# Supplementary material
Source: Research Square preprint supplement (doi:10.21203/rs.3.rs-9392286/v1)
Supplement: Supplementary file 1 [file 17e467940813b19746484287.xlsx]

## Sheet: Table S3（GSE128033_sample_anno）
Table S3: The cell type in the GSE128033
sample_id	sample_celltype	celltype	condition	dataset
GSM3660641	GSM3660641|B_cell	B_cell	subject status: normal/healthy donor	GSE128033
GSM3660641	GSM3660641|Smooth_muscle_cells	Smooth_muscle_cells	subject status: normal/healthy donor	GSE128033
GSM3660641	GSM3660641|GMP	GMP	subject status: normal/healthy donor	GSE128033
GSM3660641	GSM3660641|CMP	CMP	subject status: normal/healthy donor	GSE128033
GSM3660641	GSM3660641|DC	DC	subject status: normal/healthy donor	GSE128033
GSM3660641	GSM3660641|Hepatocytes	Hepatocytes	subject status: normal/healthy donor	GSE128033
GSM3660641	GSM3660641|T_cells	T_cells	subject status: normal/healthy donor	GSE128033
GSM3660641	GSM3660641|Endothelial_cells	Endothelial_cells	subject status: normal/healthy donor	GSE128033
GSM3660641	GSM3660641|Neutrophils	Neutrophils	subject status: normal/healthy donor	GSE128033
GSM3660641	GSM3660641|Epithelial_cells	Epithelial_cells	subject status: normal/healthy donor	GSE128033
GSM3660641	GSM3660641|HSC_CD34+	HSC_CD34+	subject status: normal/healthy donor	GSE128033
GSM3660641	GSM3660641|NK_cell	NK_cell	subject status: normal/healthy donor	GSE128033
GSM3660641	GSM3660641|MEP	MEP	subject status: normal/healthy donor	GSE128033
GSM3660641	GSM3660641|BM	BM	subject status: normal/healthy donor	GSE128033
GSM3660641	GSM3660641|Pre-B_cell_CD34-	Pre-B_cell_CD34-	subject status: normal/healthy donor	GSE128033
GSM3660641	GSM3660641|Fibroblasts	Fibroblasts	subject status: normal/healthy donor	GSE128033
GSM3660641	GSM3660641|Pro-B_cell_CD34+	Pro-B_cell_CD34+	subject status: normal/healthy donor	GSE128033
GSM3660641	GSM3660641|Monocyte	Monocyte	subject status: normal/healthy donor	GSE128033
GSM3660641	GSM3660641|Macrophage	Macrophage	subject status: normal/healthy donor	GSE128033
GSM3660641	GSM3660641|HSC_-G-CSF	HSC_-G-CSF	subject status: normal/healthy donor	GSE128033
GSM3660641	GSM3660641|Tissue_stem_cells	Tissue_stem_cells	subject status: normal/healthy donor	GSE128033
GSM3660641	GSM3660641|Chondrocytes	Chondrocytes	subject status: normal/healthy donor	GSE128033
GSM3660641	GSM3660641|Myelocyte	Myelocyte	subject status: normal/healthy donor	GSE128033
GSM3660642	GSM3660642|Smooth_muscle_cells	Smooth_muscle_cells	subject status: normal/healthy donor	GSE128033
GSM3660642	GSM3660642|T_cells	T_cells	subject status: normal/healthy donor	GSE128033
GSM3660642	GSM3660642|HSC_CD34+	HSC_CD34+	subject status: normal/healthy donor	GSE128033
GSM3660642	GSM3660642|Erythroblast	Erythroblast	subject status: normal/healthy donor	GSE128033
GSM3660642	GSM3660642|Neurons	Neurons	subject status: normal/healthy donor	GSE128033
GSM3660642	GSM3660642|Pre-B_cell_CD34-	Pre-B_cell_CD34-	subject status: normal/healthy donor	GSE128033
GSM3660642	GSM3660642|Fibroblasts	Fibroblasts	subject status: normal/healthy donor	GSE128033
GSM3660642	GSM3660642|Pro-Myelocyte	Pro-Myelocyte	subject status: normal/healthy donor	GSE128033
GSM3660642	GSM3660642|Neutrophils	Neutrophils	subject status: normal/healthy donor	GSE128033
GSM3660642	GSM3660642|Hepatocytes	Hepatocytes	subject status: normal/healthy donor	GSE128033
GSM3660642	GSM3660642|DC	DC	subject status: normal/healthy donor	GSE128033
GSM3660642	GSM3660642|CMP	CMP	subject status: normal/healthy donor	GSE128033
GSM3660642	GSM3660642|GMP	GMP	subject status: normal/healthy donor	GSE128033
GSM3660642	GSM3660642|Endothelial_cells	Endothelial_cells	subject status: normal/healthy donor	GSE128033
GSM3660642	GSM3660642|Epithelial_cells	Epithelial_cells	subject status: normal/healthy donor	GSE128033
GSM3660642	GSM3660642|NK_cell	NK_cell	subject status: normal/healthy donor	GSE128033
GSM3660642	GSM3660642|Monocyte	Monocyte	subject status: normal/healthy donor	GSE128033
GSM3660642	GSM3660642|MEP	MEP	subject status: normal/healthy donor	GSE128033
GSM3660642	GSM3660642|Chondrocytes	Chondrocytes	subject status: normal/healthy donor	GSE128033
GSM3660642	GSM3660642|Tissue_stem_cells	Tissue_stem_cells	subject status: normal/healthy donor	GSE128033
GSM3660642	GSM3660642|Macrophage	Macrophage	subject status: normal/healthy donor	GSE128033
GSM3660642	GSM3660642|HSC_-G-CSF	HSC_-G-CSF	subject status: normal/healthy donor	GSE128033
GSM3660642	GSM3660642|B_cell	B_cell	subject status: normal/healthy donor	GSE128033
GSM3660642	GSM3660642|BM	BM	subject status: normal/healthy donor	GSE128033
GSM3660643	GSM3660643|B_cell	B_cell	subject status: normal/healthy donor	GSE128033
GSM3660643	GSM3660643|Pro-B_cell_CD34+	Pro-B_cell_CD34+	subject status: normal/healthy donor	GSE128033
GSM3660643	GSM3660643|Neutrophils	Neutrophils	subject status: normal/healthy donor	GSE128033
GSM3660643	GSM3660643|Pre-B_cell_CD34-	Pre-B_cell_CD34-	subject status: normal/healthy donor	GSE128033
GSM3660643	GSM3660643|CMP	CMP	subject status: normal/healthy donor	GSE128033
GSM3660643	GSM3660643|NK_cell	NK_cell	subject status: normal/healthy donor	GSE128033
GSM3660643	GSM3660643|Macrophage	Macrophage	subject status: normal/healthy donor	GSE128033
GSM3660643	GSM3660643|Neurons	Neurons	subject status: normal/healthy donor	GSE128033
GSM3660643	GSM3660643|Erythroblast	Erythroblast	subject status: normal/healthy donor	GSE128033
GSM3660643	GSM3660643|Fibroblasts	Fibroblasts	subject status: normal/healthy donor	GSE128033
GSM3660643	GSM3660643|GMP	GMP	subject status: normal/healthy donor	GSE128033
GSM3660643	GSM3660643|Endothelial_cells	Endothelial_cells	subject status: normal/healthy donor	GSE128033
GSM3660643	GSM3660643|Chondrocytes	Chondrocytes	subject status: normal/healthy donor	GSE128033
GSM3660643	GSM3660643|T_cells	T_cells	subject status: normal/healthy donor	GSE128033
GSM3660643	GSM3660643|Monocyte	Monocyte	subject status: normal/healthy donor	GSE128033
GSM3660643	GSM3660643|Smooth_muscle_cells	Smooth_muscle_cells	subject status: normal/healthy donor	GSE128033
GSM3660643	GSM3660643|Hepatocytes	Hepatocytes	subject status: normal/healthy donor	GSE128033
GSM3660643	GSM3660643|Epithelial_cells	Epithelial_cells	subject status: normal/healthy donor	GSE128033
GSM3660643	GSM3660643|HSC_CD34+	HSC_CD34+	subject status: normal/healthy donor	GSE128033
GSM3660643	GSM3660643|HSC_-G-CSF	HSC_-G-CSF	subject status: normal/healthy donor	GSE128033
GSM3660643	GSM3660643|BM	BM	subject status: normal/healthy donor	GSE128033
GSM3660643	GSM3660643|DC	DC	subject status: normal/healthy donor	GSE128033
GSM3660643	GSM3660643|Tissue_stem_cells	Tissue_stem_cells	subject status: normal/healthy donor	GSE128033
GSM3660643	GSM3660643|Myelocyte	Myelocyte	subject status: normal/healthy donor	GSE128033
GSM3660643	GSM3660643|MEP	MEP	subject status: normal/healthy donor	GSE128033
GSM3660644	GSM3660644|Pro-B_cell_CD34+	Pro-B_cell_CD34+	subject status: normal/healthy donor	GSE128033
GSM3660644	GSM3660644|NK_cell	NK_cell	subject status: normal/healthy donor	GSE128033
GSM3660644	GSM3660644|GMP	GMP	subject status: normal/healthy donor	GSE128033
GSM3660644	GSM3660644|T_cells	T_cells	subject status: normal/healthy donor	GSE128033
GSM3660644	GSM3660644|Hepatocytes	Hepatocytes	subject status: normal/healthy donor	GSE128033
GSM3660644	GSM3660644|CMP	CMP	subject status: normal/healthy donor	GSE128033
GSM3660644	GSM3660644|Endothelial_cells	Endothelial_cells	subject status: normal/healthy donor	GSE128033
GSM3660644	GSM3660644|Keratinocytes	Keratinocytes	subject status: normal/healthy donor	GSE128033
GSM3660644	GSM3660644|HSC_CD34+	HSC_CD34+	subject status: normal/healthy donor	GSE128033
GSM3660644	GSM3660644|BM	BM	subject status: normal/healthy donor	GSE128033
GSM3660644	GSM3660644|Neurons	Neurons	subject status: normal/healthy donor	GSE128033
GSM3660644	GSM3660644|Chondrocytes	Chondrocytes	subject status: normal/healthy donor	GSE128033
GSM3660644	GSM3660644|Smooth_muscle_cells	Smooth_muscle_cells	subject status: normal/healthy donor	GSE128033
GSM3660644	GSM3660644|B_cell	B_cell	subject status: normal/healthy donor	GSE128033
GSM3660644	GSM3660644|Tissue_stem_cells	Tissue_stem_cells	subject status: normal/healthy donor	GSE128033
GSM3660644	GSM3660644|DC	DC	subject status: normal/healthy donor	GSE128033
GSM3660644	GSM3660644|Monocyte	Monocyte	subject status: normal/healthy donor	GSE128033
GSM3660644	GSM3660644|Neutrophils	Neutrophils	subject status: normal/healthy donor	GSE128033
GSM3660644	GSM3660644|Epithelial_cells	Epithelial_cells	subject status: normal/healthy donor	GSE128033
GSM3660644	GSM3660644|Myelocyte	Myelocyte	subject status: normal/healthy donor	GSE128033
GSM3660644	GSM3660644|Macrophage	Macrophage	subject status: normal/healthy donor	GSE128033
GSM3660644	GSM3660644|HSC_-G-CSF	HSC_-G-CSF	subject status: normal/healthy donor	GSE128033
GSM3660644	GSM3660644|Pre-B_cell_CD34-	Pre-B_cell_CD34-	subject status: normal/healthy donor	GSE128033
GSM3660644	GSM3660644|Fibroblasts	Fibroblasts	subject status: normal/healthy donor	GSE128033
GSM3660645	GSM3660645|MEP	MEP	subject status: normal/healthy donor	GSE128033
GSM3660645	GSM3660645|Platelets	Platelets	subject status: normal/healthy donor	GSE128033
GSM3660645	GSM3660645|Smooth_muscle_cells	Smooth_muscle_cells	subject status: normal/healthy donor	GSE128033
GSM3660645	GSM3660645|CMP	CMP	subject status: normal/healthy donor	GSE128033
GSM3660645	GSM3660645|HSC_CD34+	HSC_CD34+	subject status: normal/healthy donor	GSE128033
GSM3660645	GSM3660645|Neurons	Neurons	subject status: normal/healthy donor	GSE128033
GSM3660645	GSM3660645|Hepatocytes	Hepatocytes	subject status: normal/healthy donor	GSE128033
GSM3660645	GSM3660645|Pro-B_cell_CD34+	Pro-B_cell_CD34+	subject status: normal/healthy donor	GSE128033
GSM3660645	GSM3660645|Neutrophils	Neutrophils	subject status: normal/healthy donor	GSE128033
GSM3660645	GSM3660645|Tissue_stem_cells	Tissue_stem_cells	subject status: normal/healthy donor	GSE128033
GSM3660645	GSM3660645|Macrophage	Macrophage	subject status: normal/healthy donor	GSE128033
GSM3660645	GSM3660645|NK_cell	NK_cell	subject status: normal/healthy donor	GSE128033
GSM3660645	GSM3660645|B_cell	B_cell	subject status: normal/healthy donor	GSE128033
GSM3660645	GSM3660645|Epithelial_cells	Epithelial_cells	subject status: normal/healthy donor	GSE128033
GSM3660645	GSM3660645|Chondrocytes	Chondrocytes	subject status: normal/healthy donor	GSE128033
GSM3660645	GSM3660645|Fibroblasts	Fibroblasts	subject status: normal/healthy donor	GSE128033
GSM3660645	GSM3660645|Keratinocytes	Keratinocytes	subject status: normal/healthy donor	GSE128033
GSM3660645	GSM3660645|GMP	GMP	subject status: normal/healthy donor	GSE128033
GSM3660645	GSM3660645|DC	DC	subject status: normal/healthy donor	GSE128033
GSM3660645	GSM3660645|T_cells	T_cells	subject status: normal/healthy donor	GSE128033
GSM3660645	GSM3660645|Monocyte	Monocyte	subject status: normal/healthy donor	GSE128033
GSM3660645	GSM3660645|Endothelial_cells	Endothelial_cells	subject status: normal/healthy donor	GSE128033
GSM3660645	GSM3660645|HSC_-G-CSF	HSC_-G-CSF	subject status: normal/healthy donor	GSE128033
GSM3660645	GSM3660645|Myelocyte	Myelocyte	subject status: normal/healthy donor	GSE128033
GSM3660645	GSM3660645|BM	BM	subject status: normal/healthy donor	GSE128033
GSM3660645	GSM3660645|Pre-B_cell_CD34-	Pre-B_cell_CD34-	subject status: normal/healthy donor	GSE128033
GSM3660646	GSM3660646|MEP	MEP	subject status: normal/healthy donor	GSE128033
GSM3660646	GSM3660646|Monocyte	Monocyte	subject status: normal/healthy donor	GSE128033
GSM3660646	GSM3660646|CMP	CMP	subject status: normal/healthy donor	GSE128033
GSM3660646	GSM3660646|NK_cell	NK_cell	subject status: normal/healthy donor	GSE128033
GSM3660646	GSM3660646|Keratinocytes	Keratinocytes	subject status: normal/healthy donor	GSE128033
GSM3660646	GSM3660646|Pro-B_cell_CD34+	Pro-B_cell_CD34+	subject status: normal/healthy donor	GSE128033
GSM3660646	GSM3660646|Hepatocytes	Hepatocytes	subject status: normal/healthy donor	GSE128033
GSM3660646	GSM3660646|Smooth_muscle_cells	Smooth_muscle_cells	subject status: normal/healthy donor	GSE128033
GSM3660646	GSM3660646|Endothelial_cells	Endothelial_cells	subject status: normal/healthy donor	GSE128033
GSM3660646	GSM3660646|Macrophage	Macrophage	subject status: normal/healthy donor	GSE128033
GSM3660646	GSM3660646|Chondrocytes	Chondrocytes	subject status: normal/healthy donor	GSE128033
GSM3660646	GSM3660646|Neurons	Neurons	subject status: normal/healthy donor	GSE128033
GSM3660646	GSM3660646|Fibroblasts	Fibroblasts	subject status: normal/healthy donor	GSE128033
GSM3660646	GSM3660646|B_cell	B_cell	subject status: normal/healthy donor	GSE128033
GSM3660646	GSM3660646|HSC_CD34+	HSC_CD34+	subject status: normal/healthy donor	GSE128033
GSM3660646	GSM3660646|Pre-B_cell_CD34-	Pre-B_cell_CD34-	subject status: normal/healthy donor	GSE128033
GSM3660646	GSM3660646|T_cells	T_cells	subject status: normal/healthy donor	GSE128033
GSM3660646	GSM3660646|Myelocyte	Myelocyte	subject status: normal/healthy donor	GSE128033
GSM3660646	GSM3660646|GMP	GMP	subject status: normal/healthy donor	GSE128033
GSM3660646	GSM3660646|Neutrophils	Neutrophils	subject status: normal/healthy donor	GSE128033
GSM3660646	GSM3660646|HSC_-G-CSF	HSC_-G-CSF	subject status: normal/healthy donor	GSE128033
GSM3660646	GSM3660646|DC	DC	subject status: normal/healthy donor	GSE128033
GSM3660646	GSM3660646|Epithelial_cells	Epithelial_cells	subject status: normal/healthy donor	GSE128033
GSM3660646	GSM3660646|BM	BM	subject status: normal/healthy donor	GSE128033
GSM3660646	GSM3660646|Tissue_stem_cells	Tissue_stem_cells	subject status: normal/healthy donor	GSE128033
GSM3660647	GSM3660647|Fibroblasts	Fibroblasts	subject status: normal/healthy donor	GSE128033
GSM3660647	GSM3660647|Keratinocytes	Keratinocytes	subject status: normal/healthy donor	GSE128033
GSM3660647	GSM3660647|HSC_CD34+	HSC_CD34+	subject status: normal/healthy donor	GSE128033
GSM3660647	GSM3660647|Hepatocytes	Hepatocytes	subject status: normal/healthy donor	GSE128033
GSM3660647	GSM3660647|Monocyte	Monocyte	subject status: normal/healthy donor	GSE128033
GSM3660647	GSM3660647|Chondrocytes	Chondrocytes	subject status: normal/healthy donor	GSE128033
GSM3660647	GSM3660647|Smooth_muscle_cells	Smooth_muscle_cells	subject status: normal/healthy donor	GSE128033
GSM3660647	GSM3660647|Macrophage	Macrophage	subject status: normal/healthy donor	GSE128033
GSM3660647	GSM3660647|Neurons	Neurons	subject status: normal/healthy donor	GSE128033
GSM3660647	GSM3660647|T_cells	T_cells	subject status: normal/healthy donor	GSE128033
GSM3660647	GSM3660647|Neutrophils	Neutrophils	subject status: normal/healthy donor	GSE128033
GSM3660647	GSM3660647|Myelocyte	Myelocyte	subject status: normal/healthy donor	GSE128033
GSM3660647	GSM3660647|NK_cell	NK_cell	subject status: normal/healthy donor	GSE128033
GSM3660647	GSM3660647|HSC_-G-CSF	HSC_-G-CSF	subject status: normal/healthy donor	GSE128033
GSM3660647	GSM3660647|DC	DC	subject status: normal/healthy donor	GSE128033
GSM3660647	GSM3660647|Tissue_stem_cells	Tissue_stem_cells	subject status: normal/healthy donor	GSE128033
GSM3660647	GSM3660647|Epithelial_cells	Epithelial_cells	subject status: normal/healthy donor	GSE128033
GSM3660647	GSM3660647|GMP	GMP	subject status: normal/healthy donor	GSE128033
GSM3660647	GSM3660647|Endothelial_cells	Endothelial_cells	subject status: normal/healthy donor	GSE128033
GSM3660647	GSM3660647|BM	BM	subject status: normal/healthy donor	GSE128033
GSM3660647	GSM3660647|CMP	CMP	subject status: normal/healthy donor	GSE128033
GSM3660647	GSM3660647|B_cell	B_cell	subject status: normal/healthy donor	GSE128033
GSM3660647	GSM3660647|Pre-B_cell_CD34-	Pre-B_cell_CD34-	subject status: normal/healthy donor	GSE128033
GSM3660648	GSM3660648|T_cells	T_cells	subject status: normal/healthy donor	GSE128033
GSM3660648	GSM3660648|Monocyte	Monocyte	subject status: normal/healthy donor	GSE128033
GSM3660648	GSM3660648|Keratinocytes	Keratinocytes	subject status: normal/healthy donor	GSE128033
GSM3660648	GSM3660648|Neurons	Neurons	subject status: normal/healthy donor	GSE128033
GSM3660648	GSM3660648|CMP	CMP	subject status: normal/healthy donor	GSE128033
GSM3660648	GSM3660648|Neutrophils	Neutrophils	subject status: normal/healthy donor	GSE128033
GSM3660648	GSM3660648|Hepatocytes	Hepatocytes	subject status: normal/healthy donor	GSE128033
GSM3660648	GSM3660648|NK_cell	NK_cell	subject status: normal/healthy donor	GSE128033
GSM3660648	GSM3660648|Macrophage	Macrophage	subject status: normal/healthy donor	GSE128033
GSM3660648	GSM3660648|DC	DC	subject status: normal/healthy donor	GSE128033
GSM3660648	GSM3660648|Pro-Myelocyte	Pro-Myelocyte	subject status: normal/healthy donor	GSE128033
GSM3660648	GSM3660648|Epithelial_cells	Epithelial_cells	subject status: normal/healthy donor	GSE128033
GSM3660648	GSM3660648|GMP	GMP	subject status: normal/healthy donor	GSE128033
GSM3660648	GSM3660648|Endothelial_cells	Endothelial_cells	subject status: normal/healthy donor	GSE128033
GSM3660648	GSM3660648|Fibroblasts	Fibroblasts	subject status: normal/healthy donor	GSE128033
GSM3660648	GSM3660648|Chondrocytes	Chondrocytes	subject status: normal/healthy donor	GSE128033
GSM3660648	GSM3660648|B_cell	B_cell	subject status: normal/healthy donor	GSE128033
GSM3660648	GSM3660648|HSC_-G-CSF	HSC_-G-CSF	subject status: normal/healthy donor	GSE128033
GSM3660648	GSM3660648|Myelocyte	Myelocyte	subject status: normal/healthy donor	GSE128033
GSM3660648	GSM3660648|Smooth_muscle_cells	Smooth_muscle_cells	subject status: normal/healthy donor	GSE128033
GSM3660648	GSM3660648|Pro-B_cell_CD34+	Pro-B_cell_CD34+	subject status: normal/healthy donor	GSE128033
GSM3660648	GSM3660648|Pre-B_cell_CD34-	Pre-B_cell_CD34-	subject status: normal/healthy donor	GSE128033
GSM3660648	GSM3660648|Tissue_stem_cells	Tissue_stem_cells	subject status: normal/healthy donor	GSE128033
GSM3660648	GSM3660648|BM	BM	subject status: normal/healthy donor	GSE128033
GSM3660648	GSM3660648|HSC_CD34+	HSC_CD34+	subject status: normal/healthy donor	GSE128033
GSM3660652	GSM3660652|Macrophage	Macrophage	subject status: idiopathic pulmonary fibrosis (IPF)	GSE128033
GSM3660652	GSM3660652|DC	DC	subject status: idiopathic pulmonary fibrosis (IPF)	GSE128033
GSM3660652	GSM3660652|Pre-B_cell_CD34-	Pre-B_cell_CD34-	subject status: idiopathic pulmonary fibrosis (IPF)	GSE128033
GSM3660652	GSM3660652|HSC_-G-CSF	HSC_-G-CSF	subject status: idiopathic pulmonary fibrosis (IPF)	GSE128033
GSM3660652	GSM3660652|CMP	CMP	subject status: idiopathic pulmonary fibrosis (IPF)	GSE128033
GSM3660652	GSM3660652|Tissue_stem_cells	Tissue_stem_cells	subject status: idiopathic pulmonary fibrosis (IPF)	GSE128033
GSM3660652	GSM3660652|Neutrophils	Neutrophils	subject status: idiopathic pulmonary fibrosis (IPF)	GSE128033
GSM3660652	GSM3660652|Hepatocytes	Hepatocytes	subject status: idiopathic pulmonary fibrosis (IPF)	GSE128033
GSM3660652	GSM3660652|GMP	GMP	subject status: idiopathic pulmonary fibrosis (IPF)	GSE128033
GSM3660652	GSM3660652|BM	BM	subject status: idiopathic pulmonary fibrosis (IPF)	GSE128033
GSM3660652	GSM3660652|NK_cell	NK_cell	subject status: idiopathic pulmonary fibrosis (IPF)	GSE128033
GSM3660652	GSM3660652|T_cells	T_cells	subject status: idiopathic pulmonary fibrosis (IPF)	GSE128033
GSM3660652	GSM3660652|Chondrocytes	Chondrocytes	subject status: idiopathic pulmonary fibrosis (IPF)	GSE128033
GSM3660652	GSM3660652|Endothelial_cells	Endothelial_cells	subject status: idiopathic pulmonary fibrosis (IPF)	GSE128033
GSM3660652	GSM3660652|Monocyte	Monocyte	subject status: idiopathic pulmonary fibrosis (IPF)	GSE128033
GSM3660652	GSM3660652|B_cell	B_cell	subject status: idiopathic pulmonary fibrosis (IPF)	GSE128033
GSM3660652	GSM3660652|Neurons	Neurons	subject status: idiopathic pulmonary fibrosis (IPF)	GSE128033
GSM3660652	GSM3660652|Epithelial_cells	Epithelial_cells	subject status: idiopathic pulmonary fibrosis (IPF)	GSE128033
GSM3660652	GSM3660652|Fibroblasts	Fibroblasts	subject status: idiopathic pulmonary fibrosis (IPF)	GSE128033
GSM3660652	GSM3660652|Smooth_muscle_cells	Smooth_muscle_cells	subject status: idiopathic pulmonary fibrosis (IPF)	GSE128033
GSM3660652	GSM3660652|Myelocyte	Myelocyte	subject status: idiopathic pulmonary fibrosis (IPF)	GSE128033
GSM3660652	GSM3660652|HSC_CD34+	HSC_CD34+	subject status: idiopathic pulmonary fibrosis (IPF)	GSE128033
GSM3660653	GSM3660653|Neutrophils	Neutrophils	subject status: idiopathic pulmonary fibrosis (IPF)	GSE128033
GSM3660653	GSM3660653|GMP	GMP	subject status: idiopathic pulmonary fibrosis (IPF)	GSE128033
GSM3660653	GSM3660653|Keratinocytes	Keratinocytes	subject status: idiopathic pulmonary fibrosis (IPF)	GSE128033
GSM3660653	GSM3660653|Myelocyte	Myelocyte	subject status: idiopathic pulmonary fibrosis (IPF)	GSE128033
GSM3660653	GSM3660653|T_cells	T_cells	subject status: idiopathic pulmonary fibrosis (IPF)	GSE128033
GSM3660653	GSM3660653|Smooth_muscle_cells	Smooth_muscle_cells	subject status: idiopathic pulmonary fibrosis (IPF)	GSE128033
GSM3660653	GSM3660653|HSC_-G-CSF	HSC_-G-CSF	subject status: idiopathic pulmonary fibrosis (IPF)	GSE128033
GSM3660653	GSM3660653|Pre-B_cell_CD34-	Pre-B_cell_CD34-	subject status: idiopathic pulmonary fibrosis (IPF)	GSE128033
GSM3660653	GSM3660653|Monocyte	Monocyte	subject status: idiopathic pulmonary fibrosis (IPF)	GSE128033
GSM3660653	GSM3660653|NK_cell	NK_cell	subject status: idiopathic pulmonary fibrosis (IPF)	GSE128033
GSM3660653	GSM3660653|Neurons	Neurons	subject status: idiopathic pulmonary fibrosis (IPF)	GSE128033
GSM3660653	GSM3660653|Hepatocytes	Hepatocytes	subject status: idiopathic pulmonary fibrosis (IPF)	GSE128033
GSM3660653	GSM3660653|Macrophage	Macrophage	subject status: idiopathic pulmonary fibrosis (IPF)	GSE128033
GSM3660653	GSM3660653|BM	BM	subject status: idiopathic pulmonary fibrosis (IPF)	GSE128033
GSM3660653	GSM3660653|Endothelial_cells	Endothelial_cells	subject status: idiopathic pulmonary fibrosis (IPF)	GSE128033
GSM3660653	GSM3660653|Tissue_stem_cells	Tissue_stem_cells	subject status: idiopathic pulmonary fibrosis (IPF)	GSE128033
GSM3660653	GSM3660653|B_cell	B_cell	subject status: idiopathic pulmonary fibrosis (IPF)	GSE128033
GSM3660653	GSM3660653|Fibroblasts	Fibroblasts	subject status: idiopathic pulmonary fibrosis (IPF)	GSE128033
GSM3660653	GSM3660653|CMP	CMP	subject status: idiopathic pulmonary fibrosis (IPF)	GSE128033
GSM3660653	GSM3660653|HSC_CD34+	HSC_CD34+	subject status: idiopathic pulmonary fibrosis (IPF)	GSE128033
GSM3660653	GSM3660653|DC	DC	subject status: idiopathic pulmonary fibrosis (IPF)	GSE128033
GSM3660653	GSM3660653|Pro-Myelocyte	Pro-Myelocyte	subject status: idiopathic pulmonary fibrosis (IPF)	GSE128033
GSM3660653	GSM3660653|Chondrocytes	Chondrocytes	subject status: idiopathic pulmonary fibrosis (IPF)	GSE128033
GSM3660653	GSM3660653|Pro-B_cell_CD34+	Pro-B_cell_CD34+	subject status: idiopathic pulmonary fibrosis (IPF)	GSE128033
GSM3660653	GSM3660653|Epithelial_cells	Epithelial_cells	subject status: idiopathic pulmonary fibrosis (IPF)	GSE128033
GSM3660654	GSM3660654|Neutrophils	Neutrophils	subject status: idiopathic pulmonary fibrosis (IPF)	GSE128033
GSM3660654	GSM3660654|Monocyte	Monocyte	subject status: idiopathic pulmonary fibrosis (IPF)	GSE128033
GSM3660654	GSM3660654|NK_cell	NK_cell	subject status: idiopathic pulmonary fibrosis (IPF)	GSE128033
GSM3660654	GSM3660654|Neurons	Neurons	subject status: idiopathic pulmonary fibrosis (IPF)	GSE128033
GSM3660654	GSM3660654|T_cells	T_cells	subject status: idiopathic pulmonary fibrosis (IPF)	GSE128033
GSM3660654	GSM3660654|DC	DC	subject status: idiopathic pulmonary fibrosis (IPF)	GSE128033
GSM3660654	GSM3660654|Pre-B_cell_CD34-	Pre-B_cell_CD34-	subject status: idiopathic pulmonary fibrosis (IPF)	GSE128033
GSM3660654	GSM3660654|Keratinocytes	Keratinocytes	subject status: idiopathic pulmonary fibrosis (IPF)	GSE128033
GSM3660654	GSM3660654|HSC_-G-CSF	HSC_-G-CSF	subject status: idiopathic pulmonary fibrosis (IPF)	GSE128033
GSM3660654	GSM3660654|Tissue_stem_cells	Tissue_stem_cells	subject status: idiopathic pulmonary fibrosis (IPF)	GSE128033
GSM3660654	GSM3660654|Fibroblasts	Fibroblasts	subject status: idiopathic pulmonary fibrosis (IPF)	GSE128033
GSM3660654	GSM3660654|GMP	GMP	subject status: idiopathic pulmonary fibrosis (IPF)	GSE128033
GSM3660654	GSM3660654|Epithelial_cells	Epithelial_cells	subject status: idiopathic pulmonary fibrosis (IPF)	GSE128033
GSM3660654	GSM3660654|B_cell	B_cell	subject status: idiopathic pulmonary fibrosis (IPF)	GSE128033
GSM3660654	GSM3660654|CMP	CMP	subject status: idiopathic pulmonary fibrosis (IPF)	GSE128033
GSM3660654	GSM3660654|Macrophage	Macrophage	subject status: idiopathic pulmonary fibrosis (IPF)	GSE128033
GSM3660654	GSM3660654|HSC_CD34+	HSC_CD34+	subject status: idiopathic pulmonary fibrosis (IPF)	GSE128033
GSM3660654	GSM3660654|Hepatocytes	Hepatocytes	subject status: idiopathic pulmonary fibrosis (IPF)	GSE128033
GSM3660654	GSM3660654|Smooth_muscle_cells	Smooth_muscle_cells	subject status: idiopathic pulmonary fibrosis (IPF)	GSE128033
GSM3660654	GSM3660654|Chondrocytes	Chondrocytes	subject status: idiopathic pulmonary fibrosis (IPF)	GSE128033
GSM3660654	GSM3660654|Myelocyte	Myelocyte	subject status: idiopathic pulmonary fibrosis (IPF)	GSE128033
GSM3660654	GSM3660654|Endothelial_cells	Endothelial_cells	subject status: idiopathic pulmonary fibrosis (IPF)	GSE128033
GSM3660655	GSM3660655|Neurons	Neurons	subject status: idiopathic pulmonary fibrosis (IPF)	GSE128033
GSM3660655	GSM3660655|T_cells	T_cells	subject status: idiopathic pulmonary fibrosis (IPF)	GSE128033
GSM3660655	GSM3660655|Hepatocytes	Hepatocytes	subject status: idiopathic pulmonary fibrosis (IPF)	GSE128033
GSM3660655	GSM3660655|HSC_CD34+	HSC_CD34+	subject status: idiopathic pulmonary fibrosis (IPF)	GSE128033
GSM3660655	GSM3660655|Neutrophils	Neutrophils	subject status: idiopathic pulmonary fibrosis (IPF)	GSE128033
GSM3660655	GSM3660655|GMP	GMP	subject status: idiopathic pulmonary fibrosis (IPF)	GSE128033
GSM3660655	GSM3660655|B_cell	B_cell	subject status: idiopathic pulmonary fibrosis (IPF)	GSE128033
GSM3660655	GSM3660655|Monocyte	Monocyte	subject status: idiopathic pulmonary fibrosis (IPF)	GSE128033
GSM3660655	GSM3660655|BM	BM	subject status: idiopathic pulmonary fibrosis (IPF)	GSE128033
GSM3660655	GSM3660655|Endothelial_cells	Endothelial_cells	subject status: idiopathic pulmonary fibrosis (IPF)	GSE128033
GSM3660655	GSM3660655|DC	DC	subject status: idiopathic pulmonary fibrosis (IPF)	GSE128033
GSM3660655	GSM3660655|NK_cell	NK_cell	subject status: idiopathic pulmonary fibrosis (IPF)	GSE128033
GSM3660655	GSM3660655|Keratinocytes	Keratinocytes	subject status: idiopathic pulmonary fibrosis (IPF)	GSE128033
GSM3660655	GSM3660655|Epithelial_cells	Epithelial_cells	subject status: idiopathic pulmonary fibrosis (IPF)	GSE128033
GSM3660655	GSM3660655|Smooth_muscle_cells	Smooth_muscle_cells	subject status: idiopathic pulmonary fibrosis (IPF)	GSE128033
GSM3660655	GSM3660655|CMP	CMP	subject status: idiopathic pulmonary fibrosis (IPF)	GSE128033
GSM3660655	GSM3660655|Macrophage	Macrophage	subject status: idiopathic pulmonary fibrosis (IPF)	GSE128033
GSM3660655	GSM3660655|HSC_-G-CSF	HSC_-G-CSF	subject status: idiopathic pulmonary fibrosis (IPF)	GSE128033
GSM3660655	GSM3660655|Tissue_stem_cells	Tissue_stem_cells	subject status: idiopathic pulmonary fibrosis (IPF)	GSE128033
GSM3660655	GSM3660655|Myelocyte	Myelocyte	subject status: idiopathic pulmonary fibrosis (IPF)	GSE128033
GSM3660655	GSM3660655|Fibroblasts	Fibroblasts	subject status: idiopathic pulmonary fibrosis (IPF)	GSE128033
GSM3660655	GSM3660655|Pro-Myelocyte	Pro-Myelocyte	subject status: idiopathic pulmonary fibrosis (IPF)	GSE128033
GSM3660655	GSM3660655|Pre-B_cell_CD34-	Pre-B_cell_CD34-	subject status: idiopathic pulmonary fibrosis (IPF)	GSE128033
GSM3660655	GSM3660655|Chondrocytes	Chondrocytes	subject status: idiopathic pulmonary fibrosis (IPF)	GSE128033
GSM3660656	GSM3660656|NK_cell	NK_cell	subject status: idiopathic pulmonary fibrosis (IPF)	GSE128033
GSM3660656	GSM3660656|Hepatocytes	Hepatocytes	subject status: idiopathic pulmonary fibrosis (IPF)	GSE128033
GSM3660656	GSM3660656|DC	DC	subject status: idiopathic pulmonary fibrosis (IPF)	GSE128033
GSM3660656	GSM3660656|Epithelial_cells	Epithelial_cells	subject status: idiopathic pulmonary fibrosis (IPF)	GSE128033
GSM3660656	GSM3660656|Monocyte	Monocyte	subject status: idiopathic pulmonary fibrosis (IPF)	GSE128033
GSM3660656	GSM3660656|Macrophage	Macrophage	subject status: idiopathic pulmonary fibrosis (IPF)	GSE128033
GSM3660656	GSM3660656|Keratinocytes	Keratinocytes	subject status: idiopathic pulmonary fibrosis (IPF)	GSE128033
GSM3660656	GSM3660656|HSC_CD34+	HSC_CD34+	subject status: idiopathic pulmonary fibrosis (IPF)	GSE128033
GSM3660656	GSM3660656|GMP	GMP	subject status: idiopathic pulmonary fibrosis (IPF)	GSE128033
GSM3660656	GSM3660656|CMP	CMP	subject status: idiopathic pulmonary fibrosis (IPF)	GSE128033
GSM3660656	GSM3660656|Neutrophils	Neutrophils	subject status: idiopathic pulmonary fibrosis (IPF)	GSE128033
GSM3660656	GSM3660656|T_cells	T_cells	subject status: idiopathic pulmonary fibrosis (IPF)	GSE128033
GSM3660656	GSM3660656|Tissue_stem_cells	Tissue_stem_cells	subject status: idiopathic pulmonary fibrosis (IPF)	GSE128033
GSM3660656	GSM3660656|Fibroblasts	Fibroblasts	subject status: idiopathic pulmonary fibrosis (IPF)	GSE128033
GSM3660656	GSM3660656|Smooth_muscle_cells	Smooth_muscle_cells	subject status: idiopathic pulmonary fibrosis (IPF)	GSE128033
GSM3660656	GSM3660656|HSC_-G-CSF	HSC_-G-CSF	subject status: idiopathic pulmonary fibrosis (IPF)	GSE128033
GSM3660656	GSM3660656|B_cell	B_cell	subject status: idiopathic pulmonary fibrosis (IPF)	GSE128033
GSM3660656	GSM3660656|Neurons	Neurons	subject status: idiopathic pulmonary fibrosis (IPF)	GSE128033
GSM3660656	GSM3660656|Myelocyte	Myelocyte	subject status: idiopathic pulmonary fibrosis (IPF)	GSE128033
GSM3660656	GSM3660656|Pre-B_cell_CD34-	Pre-B_cell_CD34-	subject status: idiopathic pulmonary fibrosis (IPF)	GSE128033
GSM3660656	GSM3660656|Endothelial_cells	Endothelial_cells	subject status: idiopathic pulmonary fibrosis (IPF)	GSE128033
GSM3660656	GSM3660656|Chondrocytes	Chondrocytes	subject status: idiopathic pulmonary fibrosis (IPF)	GSE128033
GSM3660651	GSM3660651|Neutrophils	Neutrophils	subject status: idiopathic pulmonary fibrosis (IPF)	GSE128033
GSM3660651	GSM3660651|DC	DC	subject status: idiopathic pulmonary fibrosis (IPF)	GSE128033
GSM3660651	GSM3660651|Hepatocytes	Hepatocytes	subject status: idiopathic pulmonary fibrosis (IPF)	GSE128033
GSM3660651	GSM3660651|T_cells	T_cells	subject status: idiopathic pulmonary fibrosis (IPF)	GSE128033
GSM3660651	GSM3660651|GMP	GMP	subject status: idiopathic pulmonary fibrosis (IPF)	GSE128033
GSM3660651	GSM3660651|Fibroblasts	Fibroblasts	subject status: idiopathic pulmonary fibrosis (IPF)	GSE128033
GSM3660651	GSM3660651|Smooth_muscle_cells	Smooth_muscle_cells	subject status: idiopathic pulmonary fibrosis (IPF)	GSE128033
GSM3660651	GSM3660651|Monocyte	Monocyte	subject status: idiopathic pulmonary fibrosis (IPF)	GSE128033
GSM3660651	GSM3660651|Endothelial_cells	Endothelial_cells	subject status: idiopathic pulmonary fibrosis (IPF)	GSE128033
GSM3660651	GSM3660651|HSC_CD34+	HSC_CD34+	subject status: idiopathic pulmonary fibrosis (IPF)	GSE128033
GSM3660651	GSM3660651|Epithelial_cells	Epithelial_cells	subject status: idiopathic pulmonary fibrosis (IPF)	GSE128033
GSM3660651	GSM3660651|BM	BM	subject status: idiopathic pulmonary fibrosis (IPF)	GSE128033
GSM3660651	GSM3660651|Chondrocytes	Chondrocytes	subject status: idiopathic pulmonary fibrosis (IPF)	GSE128033
GSM3660651	GSM3660651|Pre-B_cell_CD34-	Pre-B_cell_CD34-	subject status: idiopathic pulmonary fibrosis (IPF)	GSE128033
GSM3660651	GSM3660651|Myelocyte	Myelocyte	subject status: idiopathic pulmonary fibrosis (IPF)	GSE128033
GSM3660651	GSM3660651|NK_cell	NK_cell	subject status: idiopathic pulmonary fibrosis (IPF)	GSE128033
GSM3660651	GSM3660651|HSC_-G-CSF	HSC_-G-CSF	subject status: idiopathic pulmonary fibrosis (IPF)	GSE128033
GSM3660651	GSM3660651|Tissue_stem_cells	Tissue_stem_cells	subject status: idiopathic pulmonary fibrosis (IPF)	GSE128033
GSM3660651	GSM3660651|Macrophage	Macrophage	subject status: idiopathic pulmonary fibrosis (IPF)	GSE128033
GSM3660651	GSM3660651|Neurons	Neurons	subject status: idiopathic pulmonary fibrosis (IPF)	GSE128033
GSM3660657	GSM3660657|DC	DC	subject status: idiopathic pulmonary fibrosis (IPF)	GSE128033
GSM3660657	GSM3660657|NK_cell	NK_cell	subject status: idiopathic pulmonary fibrosis (IPF)	GSE128033
GSM3660657	GSM3660657|Smooth_muscle_cells	Smooth_muscle_cells	subject status: idiopathic pulmonary fibrosis (IPF)	GSE128033
GSM3660657	GSM3660657|Endothelial_cells	Endothelial_cells	subject status: idiopathic pulmonary fibrosis (IPF)	GSE128033
GSM3660657	GSM3660657|Hepatocytes	Hepatocytes	subject status: idiopathic pulmonary fibrosis (IPF)	GSE128033
GSM3660657	GSM3660657|HSC_CD34+	HSC_CD34+	subject status: idiopathic pulmonary fibrosis (IPF)	GSE128033
GSM3660657	GSM3660657|HSC_-G-CSF	HSC_-G-CSF	subject status: idiopathic pulmonary fibrosis (IPF)	GSE128033
GSM3660657	GSM3660657|BM	BM	subject status: idiopathic pulmonary fibrosis (IPF)	GSE128033
GSM3660657	GSM3660657|Neurons	Neurons	subject status: idiopathic pulmonary fibrosis (IPF)	GSE128033
GSM3660657	GSM3660657|T_cells	T_cells	subject status: idiopathic pulmonary fibrosis (IPF)	GSE128033
GSM3660657	GSM3660657|Pre-B_cell_CD34-	Pre-B_cell_CD34-	subject status: idiopathic pulmonary fibrosis (IPF)	GSE128033
GSM3660657	GSM3660657|Fibroblasts	Fibroblasts	subject status: idiopathic pulmonary fibrosis (IPF)	GSE128033
GSM3660657	GSM3660657|Chondrocytes	Chondrocytes	subject status: idiopathic pulmonary fibrosis (IPF)	GSE128033
GSM3660657	GSM3660657|Neutrophils	Neutrophils	subject status: idiopathic pulmonary fibrosis (IPF)	GSE128033
GSM3660657	GSM3660657|Macrophage	Macrophage	subject status: idiopathic pulmonary fibrosis (IPF)	GSE128033
GSM3660657	GSM3660657|Epithelial_cells	Epithelial_cells	subject status: idiopathic pulmonary fibrosis (IPF)	GSE128033
GSM3660657	GSM3660657|Keratinocytes	Keratinocytes	subject status: idiopathic pulmonary fibrosis (IPF)	GSE128033
GSM3660657	GSM3660657|GMP	GMP	subject status: idiopathic pulmonary fibrosis (IPF)	GSE128033
GSM3660657	GSM3660657|Monocyte	Monocyte	subject status: idiopathic pulmonary fibrosis (IPF)	GSE128033
GSM3660657	GSM3660657|Tissue_stem_cells	Tissue_stem_cells	subject status: idiopathic pulmonary fibrosis (IPF)	GSE128033
GSM3660658	GSM3660658|Smooth_muscle_cells	Smooth_muscle_cells	subject status: idiopathic pulmonary fibrosis (IPF)	GSE128033
GSM3660658	GSM3660658|NK_cell	NK_cell	subject status: idiopathic pulmonary fibrosis (IPF)	GSE128033
GSM3660658	GSM3660658|Neurons	Neurons	subject status: idiopathic pulmonary fibrosis (IPF)	GSE128033
GSM3660658	GSM3660658|Pre-B_cell_CD34-	Pre-B_cell_CD34-	subject status: idiopathic pulmonary fibrosis (IPF)	GSE128033
GSM3660658	GSM3660658|DC	DC	subject status: idiopathic pulmonary fibrosis (IPF)	GSE128033
GSM3660658	GSM3660658|Macrophage	Macrophage	subject status: idiopathic pulmonary fibrosis (IPF)	GSE128033
GSM3660658	GSM3660658|Hepatocytes	Hepatocytes	subject status: idiopathic pulmonary fibrosis (IPF)	GSE128033
GSM3660658	GSM3660658|HSC_-G-CSF	HSC_-G-CSF	subject status: idiopathic pulmonary fibrosis (IPF)	GSE128033
GSM3660658	GSM3660658|CMP	CMP	subject status: idiopathic pulmonary fibrosis (IPF)	GSE128033
GSM3660658	GSM3660658|Epithelial_cells	Epithelial_cells	subject status: idiopathic pulmonary fibrosis (IPF)	GSE128033
GSM3660658	GSM3660658|HSC_CD34+	HSC_CD34+	subject status: idiopathic pulmonary fibrosis (IPF)	GSE128033
GSM3660658	GSM3660658|BM	BM	subject status: idiopathic pulmonary fibrosis (IPF)	GSE128033
GSM3660658	GSM3660658|Neutrophils	Neutrophils	subject status: idiopathic pulmonary fibrosis (IPF)	GSE128033
GSM3660658	GSM3660658|Chondrocytes	Chondrocytes	subject status: idiopathic pulmonary fibrosis (IPF)	GSE128033
GSM3660658	GSM3660658|Fibroblasts	Fibroblasts	subject status: idiopathic pulmonary fibrosis (IPF)	GSE128033
GSM3660658	GSM3660658|GMP	GMP	subject status: idiopathic pulmonary fibrosis (IPF)	GSE128033
GSM3660658	GSM3660658|Monocyte	Monocyte	subject status: idiopathic pulmonary fibrosis (IPF)	GSE128033
GSM3660658	GSM3660658|T_cells	T_cells	subject status: idiopathic pulmonary fibrosis (IPF)	GSE128033
GSM3660658	GSM3660658|Myelocyte	Myelocyte	subject status: idiopathic pulmonary fibrosis (IPF)	GSE128033
GSM3660658	GSM3660658|Endothelial_cells	Endothelial_cells	subject status: idiopathic pulmonary fibrosis (IPF)	GSE128033
GSM3660658	GSM3660658|Tissue_stem_cells	Tissue_stem_cells	subject status: idiopathic pulmonary fibrosis (IPF)	GSE128033

## Sheet: Table S3（GSE279404_sample_anno）
Table S3: The cell type in the GSE279404
sample_id	sample_celltype	celltype	condition	dataset
GSM8686555	GSM8686555|B_cell	B_cell	IPF	GSE279404
GSM8686555	GSM8686555|Epithelial_cells	Epithelial_cells	IPF	GSE279404
GSM8686555	GSM8686555|Smooth_muscle_cells	Smooth_muscle_cells	IPF	GSE279404
GSM8686555	GSM8686555|Endothelial_cells	Endothelial_cells	IPF	GSE279404
GSM8686555	GSM8686555|T_cells	T_cells	IPF	GSE279404
GSM8686555	GSM8686555|Macrophage	Macrophage	IPF	GSE279404
GSM8686556	GSM8686556|Macrophage	Macrophage	IPF	GSE279404
GSM8686556	GSM8686556|Smooth_muscle_cells	Smooth_muscle_cells	IPF	GSE279404
GSM8686556	GSM8686556|Endothelial_cells	Endothelial_cells	IPF	GSE279404
GSM8686556	GSM8686556|B_cell	B_cell	IPF	GSE279404
GSM8686556	GSM8686556|Epithelial_cells	Epithelial_cells	IPF	GSE279404
GSM8686556	GSM8686556|T_cells	T_cells	IPF	GSE279404
GSM8686557	GSM8686557|B_cell	B_cell	IPF	GSE279404
GSM8686557	GSM8686557|Epithelial_cells	Epithelial_cells	IPF	GSE279404
GSM8686557	GSM8686557|T_cells	T_cells	IPF	GSE279404
GSM8686557	GSM8686557|Macrophage	Macrophage	IPF	GSE279404
GSM8686557	GSM8686557|Endothelial_cells	Endothelial_cells	IPF	GSE279404
GSM8686557	GSM8686557|Smooth_muscle_cells	Smooth_muscle_cells	IPF	GSE279404
GSM8686558	GSM8686558|Macrophage	Macrophage	IPF	GSE279404
GSM8686558	GSM8686558|Neutrophils	Neutrophils	IPF	GSE279404
GSM8686558	GSM8686558|Endothelial_cells	Endothelial_cells	IPF	GSE279404
GSM8686558	GSM8686558|Epithelial_cells	Epithelial_cells	IPF	GSE279404
GSM8686558	GSM8686558|B_cell	B_cell	IPF	GSE279404
GSM8686558	GSM8686558|Smooth_muscle_cells	Smooth_muscle_cells	IPF	GSE279404
GSM8686558	GSM8686558|T_cells	T_cells	IPF	GSE279404
GSM8686560	GSM8686560|T_cells	T_cells	IPF	GSE279404
GSM8686560	GSM8686560|Epithelial_cells	Epithelial_cells	IPF	GSE279404
GSM8686560	GSM8686560|Macrophage	Macrophage	IPF	GSE279404
GSM8686560	GSM8686560|B_cell	B_cell	IPF	GSE279404
GSM8686560	GSM8686560|Smooth_muscle_cells	Smooth_muscle_cells	IPF	GSE279404
GSM8686560	GSM8686560|Endothelial_cells	Endothelial_cells	IPF	GSE279404
GSM8686561	GSM8686561|B_cell	B_cell	IPF	GSE279404
GSM8686561	GSM8686561|T_cells	T_cells	IPF	GSE279404
GSM8686561	GSM8686561|Macrophage	Macrophage	IPF	GSE279404
GSM8686561	GSM8686561|Smooth_muscle_cells	Smooth_muscle_cells	IPF	GSE279404
GSM8686561	GSM8686561|Epithelial_cells	Epithelial_cells	IPF	GSE279404
GSM8686561	GSM8686561|Endothelial_cells	Endothelial_cells	IPF	GSE279404
GSM8686563	GSM8686563|Smooth_muscle_cells	Smooth_muscle_cells	IPF	GSE279404
GSM8686563	GSM8686563|Macrophage	Macrophage	IPF	GSE279404
GSM8686563	GSM8686563|Epithelial_cells	Epithelial_cells	IPF	GSE279404
GSM8686563	GSM8686563|T_cells	T_cells	IPF	GSE279404
GSM8686563	GSM8686563|B_cell	B_cell	IPF	GSE279404
GSM8686563	GSM8686563|Endothelial_cells	Endothelial_cells	IPF	GSE279404
GSM8686565	GSM8686565|Macrophage	Macrophage	IPF	GSE279404
GSM8686565	GSM8686565|T_cells	T_cells	IPF	GSE279404
GSM8686565	GSM8686565|Epithelial_cells	Epithelial_cells	IPF	GSE279404
GSM8686565	GSM8686565|Endothelial_cells	Endothelial_cells	IPF	GSE279404
GSM8686565	GSM8686565|Smooth_muscle_cells	Smooth_muscle_cells	IPF	GSE279404
GSM8686565	GSM8686565|B_cell	B_cell	IPF	GSE279404
GSM8686566	GSM8686566|T_cells	T_cells	IPF	GSE279404
GSM8686566	GSM8686566|Smooth_muscle_cells	Smooth_muscle_cells	IPF	GSE279404
GSM8686566	GSM8686566|Endothelial_cells	Endothelial_cells	IPF	GSE279404
GSM8686566	GSM8686566|B_cell	B_cell	IPF	GSE279404
GSM8686566	GSM8686566|Macrophage	Macrophage	IPF	GSE279404
GSM8686566	GSM8686566|Neutrophils	Neutrophils	IPF	GSE279404
GSM8686566	GSM8686566|Epithelial_cells	Epithelial_cells	IPF	GSE279404
GSM8686567	GSM8686567|T_cells	T_cells	IPF	GSE279404
GSM8686567	GSM8686567|B_cell	B_cell	IPF	GSE279404
GSM8686567	GSM8686567|Epithelial_cells	Epithelial_cells	IPF	GSE279404
GSM8686567	GSM8686567|Macrophage	Macrophage	IPF	GSE279404
GSM8686567	GSM8686567|Endothelial_cells	Endothelial_cells	IPF	GSE279404
GSM8686567	GSM8686567|Smooth_muscle_cells	Smooth_muscle_cells	IPF	GSE279404
GSM8686568	GSM8686568|Neutrophils	Neutrophils	IPF	GSE279404
GSM8686568	GSM8686568|Endothelial_cells	Endothelial_cells	IPF	GSE279404
GSM8686568	GSM8686568|Epithelial_cells	Epithelial_cells	IPF	GSE279404
GSM8686568	GSM8686568|Macrophage	Macrophage	IPF	GSE279404
GSM8686568	GSM8686568|B_cell	B_cell	IPF	GSE279404
GSM8686568	GSM8686568|T_cells	T_cells	IPF	GSE279404
GSM8686568	GSM8686568|Smooth_muscle_cells	Smooth_muscle_cells	IPF	GSE279404
GSM8686569	GSM8686569|Epithelial_cells	Epithelial_cells	IPF	GSE279404
GSM8686569	GSM8686569|Macrophage	Macrophage	IPF	GSE279404
GSM8686569	GSM8686569|T_cells	T_cells	IPF	GSE279404
GSM8686569	GSM8686569|B_cell	B_cell	IPF	GSE279404
GSM8686569	GSM8686569|Smooth_muscle_cells	Smooth_muscle_cells	IPF	GSE279404
GSM8686569	GSM8686569|Endothelial_cells	Endothelial_cells	IPF	GSE279404
GSM8686570	GSM8686570|T_cells	T_cells	IPF	GSE279404
GSM8686570	GSM8686570|Epithelial_cells	Epithelial_cells	IPF	GSE279404
GSM8686570	GSM8686570|Endothelial_cells	Endothelial_cells	IPF	GSE279404
GSM8686570	GSM8686570|Smooth_muscle_cells	Smooth_muscle_cells	IPF	GSE279404
GSM8686570	GSM8686570|B_cell	B_cell	IPF	GSE279404
GSM8686570	GSM8686570|Macrophage	Macrophage	IPF	GSE279404
GSM8686571	GSM8686571|Endothelial_cells	Endothelial_cells	IPF	GSE279404
GSM8686571	GSM8686571|T_cells	T_cells	IPF	GSE279404
GSM8686571	GSM8686571|Smooth_muscle_cells	Smooth_muscle_cells	IPF	GSE279404
GSM8686571	GSM8686571|Epithelial_cells	Epithelial_cells	IPF	GSE279404
GSM8686571	GSM8686571|Macrophage	Macrophage	IPF	GSE279404
GSM8686571	GSM8686571|B_cell	B_cell	IPF	GSE279404
GSM8686571	GSM8686571|Tissue_stem_cells	Tissue_stem_cells	IPF	GSE279404
GSM8686572	GSM8686572|B_cell	B_cell	IPF	GSE279404
GSM8686572	GSM8686572|Macrophage	Macrophage	IPF	GSE279404
GSM8686572	GSM8686572|T_cells	T_cells	IPF	GSE279404
GSM8686572	GSM8686572|Smooth_muscle_cells	Smooth_muscle_cells	IPF	GSE279404
GSM8686572	GSM8686572|Epithelial_cells	Epithelial_cells	IPF	GSE279404
GSM8686572	GSM8686572|Endothelial_cells	Endothelial_cells	IPF	GSE279404
GSM8686573	GSM8686573|Smooth_muscle_cells	Smooth_muscle_cells	control	GSE279404
GSM8686573	GSM8686573|Epithelial_cells	Epithelial_cells	control	GSE279404
GSM8686573	GSM8686573|B_cell	B_cell	control	GSE279404
GSM8686573	GSM8686573|T_cells	T_cells	control	GSE279404
GSM8686573	GSM8686573|Macrophage	Macrophage	control	GSE279404
GSM8686573	GSM8686573|Endothelial_cells	Endothelial_cells	control	GSE279404
GSM8686577	GSM8686577|Neutrophils	Neutrophils	control	GSE279404
GSM8686577	GSM8686577|Epithelial_cells	Epithelial_cells	control	GSE279404
GSM8686577	GSM8686577|T_cells	T_cells	control	GSE279404
GSM8686577	GSM8686577|Smooth_muscle_cells	Smooth_muscle_cells	control	GSE279404
GSM8686577	GSM8686577|Endothelial_cells	Endothelial_cells	control	GSE279404
GSM8686577	GSM8686577|B_cell	B_cell	control	GSE279404
GSM8686577	GSM8686577|Macrophage	Macrophage	control	GSE279404
GSM8686581	GSM8686581|Smooth_muscle_cells	Smooth_muscle_cells	control	GSE279404
GSM8686581	GSM8686581|Endothelial_cells	Endothelial_cells	control	GSE279404
GSM8686581	GSM8686581|B_cell	B_cell	control	GSE279404
GSM8686581	GSM8686581|T_cells	T_cells	control	GSE279404
GSM8686581	GSM8686581|Epithelial_cells	Epithelial_cells	control	GSE279404
GSM8686581	GSM8686581|Macrophage	Macrophage	control	GSE279404
GSM8686581	GSM8686581|Neutrophils	Neutrophils	control	GSE279404
GSM8686582	GSM8686582|Epithelial_cells	Epithelial_cells	control	GSE279404
GSM8686582	GSM8686582|B_cell	B_cell	control	GSE279404
GSM8686582	GSM8686582|T_cells	T_cells	control	GSE279404
GSM8686582	GSM8686582|Endothelial_cells	Endothelial_cells	control	GSE279404
GSM8686582	GSM8686582|Smooth_muscle_cells	Smooth_muscle_cells	control	GSE279404
GSM8686582	GSM8686582|Macrophage	Macrophage	control	GSE279404
GSM8686583	GSM8686583|Endothelial_cells	Endothelial_cells	control	GSE279404
GSM8686583	GSM8686583|B_cell	B_cell	control	GSE279404
GSM8686583	GSM8686583|Macrophage	Macrophage	control	GSE279404
GSM8686583	GSM8686583|Smooth_muscle_cells	Smooth_muscle_cells	control	GSE279404
GSM8686583	GSM8686583|Epithelial_cells	Epithelial_cells	control	GSE279404
GSM8686583	GSM8686583|T_cells	T_cells	control	GSE279404
GSM8686559	GSM8686559|T_cells	T_cells	IPF	GSE279404
GSM8686559	GSM8686559|Epithelial_cells	Epithelial_cells	IPF	GSE279404
GSM8686559	GSM8686559|Macrophage	Macrophage	IPF	GSE279404
GSM8686559	GSM8686559|Endothelial_cells	Endothelial_cells	IPF	GSE279404
GSM8686559	GSM8686559|Smooth_muscle_cells	Smooth_muscle_cells	IPF	GSE279404
GSM8686562	GSM8686562|Smooth_muscle_cells	Smooth_muscle_cells	IPF	GSE279404
GSM8686562	GSM8686562|Endothelial_cells	Endothelial_cells	IPF	GSE279404
GSM8686562	GSM8686562|Macrophage	Macrophage	IPF	GSE279404
GSM8686562	GSM8686562|Epithelial_cells	Epithelial_cells	IPF	GSE279404
GSM8686562	GSM8686562|T_cells	T_cells	IPF	GSE279404
GSM8686564	GSM8686564|T_cells	T_cells	IPF	GSE279404
GSM8686564	GSM8686564|Smooth_muscle_cells	Smooth_muscle_cells	IPF	GSE279404
GSM8686564	GSM8686564|Epithelial_cells	Epithelial_cells	IPF	GSE279404
GSM8686564	GSM8686564|Macrophage	Macrophage	IPF	GSE279404
GSM8686564	GSM8686564|Endothelial_cells	Endothelial_cells	IPF	GSE279404
GSM8686574	GSM8686574|T_cells	T_cells	control	GSE279404
GSM8686574	GSM8686574|Neutrophils	Neutrophils	control	GSE279404
GSM8686574	GSM8686574|Smooth_muscle_cells	Smooth_muscle_cells	control	GSE279404
GSM8686574	GSM8686574|Epithelial_cells	Epithelial_cells	control	GSE279404
GSM8686574	GSM8686574|Macrophage	Macrophage	control	GSE279404
GSM8686574	GSM8686574|Endothelial_cells	Endothelial_cells	control	GSE279404
GSM8686575	GSM8686575|Neutrophils	Neutrophils	control	GSE279404
GSM8686575	GSM8686575|Epithelial_cells	Epithelial_cells	control	GSE279404
GSM8686575	GSM8686575|Macrophage	Macrophage	control	GSE279404
GSM8686575	GSM8686575|T_cells	T_cells	control	GSE279404
GSM8686575	GSM8686575|Smooth_muscle_cells	Smooth_muscle_cells	control	GSE279404
GSM8686575	GSM8686575|Endothelial_cells	Endothelial_cells	control	GSE279404
GSM8686576	GSM8686576|T_cells	T_cells	control	GSE279404
GSM8686576	GSM8686576|Macrophage	Macrophage	control	GSE279404
GSM8686576	GSM8686576|Epithelial_cells	Epithelial_cells	control	GSE279404
GSM8686576	GSM8686576|Tissue_stem_cells	Tissue_stem_cells	control	GSE279404
GSM8686576	GSM8686576|Endothelial_cells	Endothelial_cells	control	GSE279404
GSM8686576	GSM8686576|Smooth_muscle_cells	Smooth_muscle_cells	control	GSE279404
GSM8686578	GSM8686578|Epithelial_cells	Epithelial_cells	control	GSE279404
GSM8686578	GSM8686578|Macrophage	Macrophage	control	GSE279404
GSM8686578	GSM8686578|Tissue_stem_cells	Tissue_stem_cells	control	GSE279404
GSM8686578	GSM8686578|Neutrophils	Neutrophils	control	GSE279404
GSM8686578	GSM8686578|Smooth_muscle_cells	Smooth_muscle_cells	control	GSE279404
GSM8686578	GSM8686578|T_cells	T_cells	control	GSE279404
GSM8686578	GSM8686578|Endothelial_cells	Endothelial_cells	control	GSE279404
GSM8686579	GSM8686579|Smooth_muscle_cells	Smooth_muscle_cells	control	GSE279404
GSM8686579	GSM8686579|Epithelial_cells	Epithelial_cells	control	GSE279404
GSM8686579	GSM8686579|T_cells	T_cells	control	GSE279404
GSM8686579	GSM8686579|Tissue_stem_cells	Tissue_stem_cells	control	GSE279404
GSM8686579	GSM8686579|Endothelial_cells	Endothelial_cells	control	GSE279404
GSM8686579	GSM8686579|Macrophage	Macrophage	control	GSE279404
GSM8686580	GSM8686580|Smooth_muscle_cells	Smooth_muscle_cells	control	GSE279404
GSM8686580	GSM8686580|Epithelial_cells	Epithelial_cells	control	GSE279404
GSM8686580	GSM8686580|Endothelial_cells	Endothelial_cells	control	GSE279404
GSM8686580	GSM8686580|T_cells	T_cells	control	GSE279404
GSM8686580	GSM8686580|Neutrophils	Neutrophils	control	GSE279404
GSM8686580	GSM8686580|Macrophage	Macrophage	control	GSE279404
GSM8686580	GSM8686580|Tissue_stem_cells	Tissue_stem_cells	control	GSE279404

## Sheet: Table S3（GSE283885_sample_anno）
Table S3: The cell type in the GSE283885
sample_id	sample_celltype	celltype	condition	dataset
GSM8673824	GSM8673824|B_cell	B_cell	control	GSE283885
GSM8673824	GSM8673824|Macrophage	Macrophage	control	GSE283885
GSM8673824	GSM8673824|Endothelial_cells	Endothelial_cells	control	GSE283885
GSM8673824	GSM8673824|NK_cell	NK_cell	control	GSE283885
GSM8673824	GSM8673824|Epithelial_cells	Epithelial_cells	control	GSE283885
GSM8673824	GSM8673824|Smooth_muscle_cells	Smooth_muscle_cells	control	GSE283885
GSM8673824	GSM8673824|Monocyte	Monocyte	control	GSE283885
GSM8673824	GSM8673824|Neutrophils	Neutrophils	control	GSE283885
GSM8673824	GSM8673824|T_cells	T_cells	control	GSE283885
GSM8673825	GSM8673825|Macrophage	Macrophage	control	GSE283885
GSM8673825	GSM8673825|B_cell	B_cell	control	GSE283885
GSM8673825	GSM8673825|Smooth_muscle_cells	Smooth_muscle_cells	control	GSE283885
GSM8673825	GSM8673825|Monocyte	Monocyte	control	GSE283885
GSM8673825	GSM8673825|Epithelial_cells	Epithelial_cells	control	GSE283885
GSM8673825	GSM8673825|Endothelial_cells	Endothelial_cells	control	GSE283885
GSM8673826	GSM8673826|Monocyte	Monocyte	control	GSE283885
GSM8673826	GSM8673826|Epithelial_cells	Epithelial_cells	control	GSE283885
GSM8673826	GSM8673826|Endothelial_cells	Endothelial_cells	control	GSE283885
GSM8673826	GSM8673826|Smooth_muscle_cells	Smooth_muscle_cells	control	GSE283885
GSM8673826	GSM8673826|Tissue_stem_cells	Tissue_stem_cells	control	GSE283885
GSM8673826	GSM8673826|B_cell	B_cell	control	GSE283885
GSM8673826	GSM8673826|T_cells	T_cells	control	GSE283885
GSM8673826	GSM8673826|Macrophage	Macrophage	control	GSE283885
GSM8673827	GSM8673827|Monocyte	Monocyte	control	GSE283885
GSM8673827	GSM8673827|Endothelial_cells	Endothelial_cells	control	GSE283885
GSM8673827	GSM8673827|T_cells	T_cells	control	GSE283885
GSM8673827	GSM8673827|NK_cell	NK_cell	control	GSE283885
GSM8673827	GSM8673827|B_cell	B_cell	control	GSE283885
GSM8673827	GSM8673827|Smooth_muscle_cells	Smooth_muscle_cells	control	GSE283885
GSM8673827	GSM8673827|Macrophage	Macrophage	control	GSE283885
GSM8673827	GSM8673827|Neutrophils	Neutrophils	control	GSE283885
GSM8673827	GSM8673827|Epithelial_cells	Epithelial_cells	control	GSE283885
GSM8673827	GSM8673827|Tissue_stem_cells	Tissue_stem_cells	control	GSE283885
GSM8673828	GSM8673828|Endothelial_cells	Endothelial_cells	control	GSE283885
GSM8673828	GSM8673828|Macrophage	Macrophage	control	GSE283885
GSM8673828	GSM8673828|Monocyte	Monocyte	control	GSE283885
GSM8673828	GSM8673828|Epithelial_cells	Epithelial_cells	control	GSE283885
GSM8673828	GSM8673828|NK_cell	NK_cell	control	GSE283885
GSM8673828	GSM8673828|T_cells	T_cells	control	GSE283885
GSM8673828	GSM8673828|Neutrophils	Neutrophils	control	GSE283885
GSM8673828	GSM8673828|B_cell	B_cell	control	GSE283885
GSM8673828	GSM8673828|Smooth_muscle_cells	Smooth_muscle_cells	control	GSE283885
GSM8673828	GSM8673828|Tissue_stem_cells	Tissue_stem_cells	control	GSE283885
GSM8673829	GSM8673829|Monocyte	Monocyte	control	GSE283885
GSM8673829	GSM8673829|Neutrophils	Neutrophils	control	GSE283885
GSM8673829	GSM8673829|Epithelial_cells	Epithelial_cells	control	GSE283885
GSM8673829	GSM8673829|NK_cell	NK_cell	control	GSE283885
GSM8673829	GSM8673829|Macrophage	Macrophage	control	GSE283885
GSM8673829	GSM8673829|Endothelial_cells	Endothelial_cells	control	GSE283885
GSM8673829	GSM8673829|T_cells	T_cells	control	GSE283885
GSM8673829	GSM8673829|B_cell	B_cell	control	GSE283885
GSM8673829	GSM8673829|Smooth_muscle_cells	Smooth_muscle_cells	control	GSE283885
GSM8673829	GSM8673829|Tissue_stem_cells	Tissue_stem_cells	control	GSE283885
GSM8673830	GSM8673830|Neutrophils	Neutrophils	control	GSE283885
GSM8673830	GSM8673830|Monocyte	Monocyte	control	GSE283885
GSM8673830	GSM8673830|Endothelial_cells	Endothelial_cells	control	GSE283885
GSM8673830	GSM8673830|Epithelial_cells	Epithelial_cells	control	GSE283885
GSM8673830	GSM8673830|Macrophage	Macrophage	control	GSE283885
GSM8673830	GSM8673830|NK_cell	NK_cell	control	GSE283885
GSM8673830	GSM8673830|T_cells	T_cells	control	GSE283885
GSM8673830	GSM8673830|Tissue_stem_cells	Tissue_stem_cells	control	GSE283885
GSM8673830	GSM8673830|Smooth_muscle_cells	Smooth_muscle_cells	control	GSE283885
GSM8673830	GSM8673830|B_cell	B_cell	control	GSE283885
GSM8673831	GSM8673831|Epithelial_cells	Epithelial_cells	control	GSE283885
GSM8673831	GSM8673831|Monocyte	Monocyte	control	GSE283885
GSM8673831	GSM8673831|Macrophage	Macrophage	control	GSE283885
GSM8673831	GSM8673831|Neutrophils	Neutrophils	control	GSE283885
GSM8673831	GSM8673831|T_cells	T_cells	control	GSE283885
GSM8673831	GSM8673831|B_cell	B_cell	control	GSE283885
GSM8673831	GSM8673831|Smooth_muscle_cells	Smooth_muscle_cells	control	GSE283885
GSM8673831	GSM8673831|Endothelial_cells	Endothelial_cells	control	GSE283885
GSM8673831	GSM8673831|NK_cell	NK_cell	control	GSE283885
GSM8673831	GSM8673831|Tissue_stem_cells	Tissue_stem_cells	control	GSE283885
GSM8673832	GSM8673832|Epithelial_cells	Epithelial_cells	control	GSE283885
GSM8673832	GSM8673832|Macrophage	Macrophage	control	GSE283885
GSM8673832	GSM8673832|Smooth_muscle_cells	Smooth_muscle_cells	control	GSE283885
GSM8673832	GSM8673832|Monocyte	Monocyte	control	GSE283885
GSM8673832	GSM8673832|B_cell	B_cell	control	GSE283885
GSM8673832	GSM8673832|Tissue_stem_cells	Tissue_stem_cells	control	GSE283885
GSM8673832	GSM8673832|Neutrophils	Neutrophils	control	GSE283885
GSM8673832	GSM8673832|T_cells	T_cells	control	GSE283885
GSM8673832	GSM8673832|Endothelial_cells	Endothelial_cells	control	GSE283885
GSM8673832	GSM8673832|NK_cell	NK_cell	control	GSE283885
GSM8673833	GSM8673833|B_cell	B_cell	IPF	GSE283885
GSM8673833	GSM8673833|Macrophage	Macrophage	IPF	GSE283885
GSM8673833	GSM8673833|Epithelial_cells	Epithelial_cells	IPF	GSE283885
GSM8673833	GSM8673833|Tissue_stem_cells	Tissue_stem_cells	IPF	GSE283885
GSM8673833	GSM8673833|Endothelial_cells	Endothelial_cells	IPF	GSE283885
GSM8673833	GSM8673833|Smooth_muscle_cells	Smooth_muscle_cells	IPF	GSE283885
GSM8673834	GSM8673834|Endothelial_cells	Endothelial_cells	IPF	GSE283885
GSM8673834	GSM8673834|Macrophage	Macrophage	IPF	GSE283885
GSM8673834	GSM8673834|Epithelial_cells	Epithelial_cells	IPF	GSE283885
GSM8673834	GSM8673834|Smooth_muscle_cells	Smooth_muscle_cells	IPF	GSE283885
GSM8673834	GSM8673834|B_cell	B_cell	IPF	GSE283885
GSM8673835	GSM8673835|Macrophage	Macrophage	IPF	GSE283885
GSM8673835	GSM8673835|Smooth_muscle_cells	Smooth_muscle_cells	IPF	GSE283885
GSM8673835	GSM8673835|T_cells	T_cells	IPF	GSE283885
GSM8673835	GSM8673835|Epithelial_cells	Epithelial_cells	IPF	GSE283885
GSM8673835	GSM8673835|Monocyte	Monocyte	IPF	GSE283885
GSM8673835	GSM8673835|Endothelial_cells	Endothelial_cells	IPF	GSE283885
GSM8673835	GSM8673835|Tissue_stem_cells	Tissue_stem_cells	IPF	GSE283885
GSM8673835	GSM8673835|B_cell	B_cell	IPF	GSE283885
GSM8673835	GSM8673835|NK_cell	NK_cell	IPF	GSE283885
GSM8673835	GSM8673835|Neutrophils	Neutrophils	IPF	GSE283885
GSM8673836	GSM8673836|Macrophage	Macrophage	IPF	GSE283885
GSM8673836	GSM8673836|Endothelial_cells	Endothelial_cells	IPF	GSE283885
GSM8673836	GSM8673836|Tissue_stem_cells	Tissue_stem_cells	IPF	GSE283885
GSM8673836	GSM8673836|B_cell	B_cell	IPF	GSE283885
GSM8673836	GSM8673836|Smooth_muscle_cells	Smooth_muscle_cells	IPF	GSE283885
GSM8673836	GSM8673836|Monocyte	Monocyte	IPF	GSE283885
GSM8673836	GSM8673836|Epithelial_cells	Epithelial_cells	IPF	GSE283885
GSM8673836	GSM8673836|T_cells	T_cells	IPF	GSE283885
GSM8673836	GSM8673836|Neutrophils	Neutrophils	IPF	GSE283885
GSM8673837	GSM8673837|B_cell	B_cell	IPF	GSE283885
GSM8673837	GSM8673837|T_cells	T_cells	IPF	GSE283885
GSM8673837	GSM8673837|Macrophage	Macrophage	IPF	GSE283885
GSM8673837	GSM8673837|Monocyte	Monocyte	IPF	GSE283885
GSM8673837	GSM8673837|Neutrophils	Neutrophils	IPF	GSE283885
GSM8673837	GSM8673837|Smooth_muscle_cells	Smooth_muscle_cells	IPF	GSE283885
GSM8673837	GSM8673837|Epithelial_cells	Epithelial_cells	IPF	GSE283885
GSM8673837	GSM8673837|NK_cell	NK_cell	IPF	GSE283885
GSM8673837	GSM8673837|Tissue_stem_cells	Tissue_stem_cells	IPF	GSE283885
GSM8673837	GSM8673837|Endothelial_cells	Endothelial_cells	IPF	GSE283885
GSM8673838	GSM8673838|Macrophage	Macrophage	IPF	GSE283885
GSM8673838	GSM8673838|B_cell	B_cell	IPF	GSE283885
GSM8673838	GSM8673838|Smooth_muscle_cells	Smooth_muscle_cells	IPF	GSE283885
GSM8673838	GSM8673838|NK_cell	NK_cell	IPF	GSE283885
GSM8673838	GSM8673838|T_cells	T_cells	IPF	GSE283885
GSM8673838	GSM8673838|Epithelial_cells	Epithelial_cells	IPF	GSE283885
GSM8673838	GSM8673838|Monocyte	Monocyte	IPF	GSE283885
GSM8673838	GSM8673838|Endothelial_cells	Endothelial_cells	IPF	GSE283885

## Sheet: Table S3（GSE190889_sample_anno）
Table S3: The cell type in the GSE190889
sample_id	sample_celltype	celltype	condition	dataset
GSM5733429	GSM5733429|Epithelial_cells	Epithelial_cells	control	GSE190889
GSM5733430	GSM5733430|Epithelial_cells	Epithelial_cells	control	GSE190889
GSM5733431	GSM5733431|Epithelial_cells	Epithelial_cells	control	GSE190889
GSM5733432	GSM5733432|Epithelial_cells	Epithelial_cells	IPF	GSE190889
GSM5733433	GSM5733433|Epithelial_cells	Epithelial_cells	IPF	GSE190889
GSM5733434	GSM5733434|Epithelial_cells	Epithelial_cells	IPF	GSE190889

## Sheet: Table S3（GSE132771_sample_anno）
Table S3: The cell type in the GSE132771
sample_id	sample_celltype	celltype	condition	dataset
GSM3891623	GSM3891623|B_cell	B_cell	control	GSE132771
GSM3891623	GSM3891623|Macrophage	Macrophage	control	GSE132771
GSM3891623	GSM3891623|Monocyte	Monocyte	control	GSE132771
GSM3891623	GSM3891623|Epithelial_cells	Epithelial_cells	control	GSE132771
GSM3891623	GSM3891623|T_cells	T_cells	control	GSE132771
GSM3891623	GSM3891623|CMP	CMP	control	GSE132771
GSM3891623	GSM3891623|NK_cell	NK_cell	control	GSE132771
GSM3891623	GSM3891623|Endothelial_cells	Endothelial_cells	control	GSE132771
GSM3891623	GSM3891623|Smooth_muscle_cells	Smooth_muscle_cells	control	GSE132771
GSM3891623	GSM3891623|Tissue_stem_cells	Tissue_stem_cells	control	GSE132771
GSM3891625	GSM3891625|B_cell	B_cell	control	GSE132771
GSM3891625	GSM3891625|Epithelial_cells	Epithelial_cells	control	GSE132771
GSM3891625	GSM3891625|T_cells	T_cells	control	GSE132771
GSM3891625	GSM3891625|NK_cell	NK_cell	control	GSE132771
GSM3891625	GSM3891625|Monocyte	Monocyte	control	GSE132771
GSM3891625	GSM3891625|Macrophage	Macrophage	control	GSE132771
GSM3891625	GSM3891625|Smooth_muscle_cells	Smooth_muscle_cells	control	GSE132771
GSM3891625	GSM3891625|Endothelial_cells	Endothelial_cells	control	GSE132771
GSM3891625	GSM3891625|Tissue_stem_cells	Tissue_stem_cells	control	GSE132771
GSM3891627	GSM3891627|Epithelial_cells	Epithelial_cells	IPF	GSE132771
GSM3891627	GSM3891627|T_cells	T_cells	IPF	GSE132771
GSM3891627	GSM3891627|B_cell	B_cell	IPF	GSE132771
GSM3891627	GSM3891627|Smooth_muscle_cells	Smooth_muscle_cells	IPF	GSE132771
GSM3891627	GSM3891627|Monocyte	Monocyte	IPF	GSE132771
GSM3891627	GSM3891627|Endothelial_cells	Endothelial_cells	IPF	GSE132771
GSM3891627	GSM3891627|CMP	CMP	IPF	GSE132771
GSM3891627	GSM3891627|Macrophage	Macrophage	IPF	GSE132771
GSM3891629	GSM3891629|Epithelial_cells	Epithelial_cells	IPF	GSE132771
GSM3891629	GSM3891629|Smooth_muscle_cells	Smooth_muscle_cells	IPF	GSE132771
GSM3891629	GSM3891629|Monocyte	Monocyte	IPF	GSE132771
GSM3891629	GSM3891629|Endothelial_cells	Endothelial_cells	IPF	GSE132771
GSM3891629	GSM3891629|T_cells	T_cells	IPF	GSE132771
GSM3891629	GSM3891629|Macrophage	Macrophage	IPF	GSE132771
GSM3891629	GSM3891629|B_cell	B_cell	IPF	GSE132771
GSM3891631	GSM3891631|Endothelial_cells	Endothelial_cells	IPF	GSE132771
GSM3891631	GSM3891631|CMP	CMP	IPF	GSE132771
GSM3891631	GSM3891631|NK_cell	NK_cell	IPF	GSE132771
GSM3891631	GSM3891631|Smooth_muscle_cells	Smooth_muscle_cells	IPF	GSE132771
GSM3891631	GSM3891631|Epithelial_cells	Epithelial_cells	IPF	GSE132771
GSM3891631	GSM3891631|Macrophage	Macrophage	IPF	GSE132771
GSM3891631	GSM3891631|Monocyte	Monocyte	IPF	GSE132771
GSM3891631	GSM3891631|T_cells	T_cells	IPF	GSE132771
GSM3891631	GSM3891631|B_cell	B_cell	IPF	GSE132771
GSM3891621	GSM3891621|Monocyte	Monocyte	control	GSE132771
GSM3891621	GSM3891621|CMP	CMP	control	GSE132771
GSM3891621	GSM3891621|Epithelial_cells	Epithelial_cells	control	GSE132771
GSM3891621	GSM3891621|Macrophage	Macrophage	control	GSE132771
GSM3891621	GSM3891621|Tissue_stem_cells	Tissue_stem_cells	control	GSE132771
GSM3891621	GSM3891621|Endothelial_cells	Endothelial_cells	control	GSE132771
GSM3891621	GSM3891621|Smooth_muscle_cells	Smooth_muscle_cells	control	GSE132771

## Sheet: Table S3（GSE136831_sample_anno）
Table S3: The cell type in the GSE136831
sample_id	sample_celltype	celltype	condition	dataset
GSM4058900	GSM4058900|Epithelial_cells	Epithelial_cells	Control	GSE136831
GSM4058900	GSM4058900|Macrophage	Macrophage	Control	GSE136831
GSM4058900	GSM4058900|NK_cell	NK_cell	Control	GSE136831
GSM4058900	GSM4058900|Smooth_muscle_cells	Smooth_muscle_cells	Control	GSE136831
GSM4058902	GSM4058902|Macrophage	Macrophage	Control	GSE136831
GSM4058902	GSM4058902|NK_cell	NK_cell	Control	GSE136831
GSM4058902	GSM4058902|Epithelial_cells	Epithelial_cells	Control	GSE136831
GSM4058903	GSM4058903|Macrophage	Macrophage	Control	GSE136831
GSM4058903	GSM4058903|NK_cell	NK_cell	Control	GSE136831
GSM4058903	GSM4058903|Epithelial_cells	Epithelial_cells	Control	GSE136831
GSM4058903	GSM4058903|Smooth_muscle_cells	Smooth_muscle_cells	Control	GSE136831
GSM4058904	GSM4058904|Macrophage	Macrophage	Control	GSE136831
GSM4058904	GSM4058904|NK_cell	NK_cell	Control	GSE136831
GSM4058904	GSM4058904|Epithelial_cells	Epithelial_cells	Control	GSE136831
GSM4058904	GSM4058904|Smooth_muscle_cells	Smooth_muscle_cells	Control	GSE136831
GSM4058905	GSM4058905|Epithelial_cells	Epithelial_cells	Control	GSE136831
GSM4058905	GSM4058905|NK_cell	NK_cell	Control	GSE136831
GSM4058906	GSM4058906|Smooth_muscle_cells	Smooth_muscle_cells	Control	GSE136831
GSM4058906	GSM4058906|NK_cell	NK_cell	Control	GSE136831
GSM4058906	GSM4058906|Epithelial_cells	Epithelial_cells	Control	GSE136831
GSM4058906	GSM4058906|Macrophage	Macrophage	Control	GSE136831
GSM4058907	GSM4058907|Smooth_muscle_cells	Smooth_muscle_cells	Control	GSE136831
GSM4058907	GSM4058907|NK_cell	NK_cell	Control	GSE136831
GSM4058907	GSM4058907|Epithelial_cells	Epithelial_cells	Control	GSE136831
GSM4058907	GSM4058907|Macrophage	Macrophage	Control	GSE136831
GSM4058908	GSM4058908|NK_cell	NK_cell	Control	GSE136831
GSM4058908	GSM4058908|Epithelial_cells	Epithelial_cells	Control	GSE136831
GSM4058908	GSM4058908|Macrophage	Macrophage	Control	GSE136831
GSM4058909	GSM4058909|Epithelial_cells	Epithelial_cells	Control	GSE136831
GSM4058909	GSM4058909|Macrophage	Macrophage	Control	GSE136831
GSM4058909	GSM4058909|NK_cell	NK_cell	Control	GSE136831
GSM4058909	GSM4058909|Smooth_muscle_cells	Smooth_muscle_cells	Control	GSE136831
GSM4058910	GSM4058910|NK_cell	NK_cell	Control	GSE136831
GSM4058910	GSM4058910|Epithelial_cells	Epithelial_cells	Control	GSE136831
GSM4058910	GSM4058910|Macrophage	Macrophage	Control	GSE136831
GSM4058911	GSM4058911|Smooth_muscle_cells	Smooth_muscle_cells	Control	GSE136831
GSM4058911	GSM4058911|Epithelial_cells	Epithelial_cells	Control	GSE136831
GSM4058911	GSM4058911|NK_cell	NK_cell	Control	GSE136831
GSM4058911	GSM4058911|Macrophage	Macrophage	Control	GSE136831
GSM4058912	GSM4058912|Smooth_muscle_cells	Smooth_muscle_cells	Control	GSE136831
GSM4058912	GSM4058912|NK_cell	NK_cell	Control	GSE136831
GSM4058912	GSM4058912|Epithelial_cells	Epithelial_cells	Control	GSE136831
GSM4058912	GSM4058912|Macrophage	Macrophage	Control	GSE136831
GSM4058913	GSM4058913|Epithelial_cells	Epithelial_cells	Control	GSE136831
GSM4058913	GSM4058913|NK_cell	NK_cell	Control	GSE136831
GSM4058913	GSM4058913|Macrophage	Macrophage	Control	GSE136831
GSM4058914	GSM4058914|NK_cell	NK_cell	Control	GSE136831
GSM4058914	GSM4058914|Macrophage	Macrophage	Control	GSE136831
GSM4058914	GSM4058914|Epithelial_cells	Epithelial_cells	Control	GSE136831
GSM4058914	GSM4058914|Smooth_muscle_cells	Smooth_muscle_cells	Control	GSE136831
GSM4058915	GSM4058915|Macrophage	Macrophage	Control	GSE136831
GSM4058915	GSM4058915|Epithelial_cells	Epithelial_cells	Control	GSE136831
GSM4058915	GSM4058915|NK_cell	NK_cell	Control	GSE136831
GSM4058916	GSM4058916|Epithelial_cells	Epithelial_cells	Control	GSE136831
GSM4058916	GSM4058916|NK_cell	NK_cell	Control	GSE136831
GSM4058916	GSM4058916|Macrophage	Macrophage	Control	GSE136831
GSM4058916	GSM4058916|Smooth_muscle_cells	Smooth_muscle_cells	Control	GSE136831
GSM4058917	GSM4058917|Epithelial_cells	Epithelial_cells	Control	GSE136831
GSM4058917	GSM4058917|NK_cell	NK_cell	Control	GSE136831
GSM4058917	GSM4058917|Macrophage	Macrophage	Control	GSE136831
GSM4058917	GSM4058917|Smooth_muscle_cells	Smooth_muscle_cells	Control	GSE136831
GSM4058918	GSM4058918|NK_cell	NK_cell	Control	GSE136831
GSM4058918	GSM4058918|Macrophage	Macrophage	Control	GSE136831
GSM4058918	GSM4058918|Epithelial_cells	Epithelial_cells	Control	GSE136831
GSM4058919	GSM4058919|Smooth_muscle_cells	Smooth_muscle_cells	Control	GSE136831
GSM4058919	GSM4058919|NK_cell	NK_cell	Control	GSE136831
GSM4058919	GSM4058919|Epithelial_cells	Epithelial_cells	Control	GSE136831
GSM4058919	GSM4058919|Macrophage	Macrophage	Control	GSE136831
GSM4058920	GSM4058920|Epithelial_cells	Epithelial_cells	Control	GSE136831
GSM4058920	GSM4058920|NK_cell	NK_cell	Control	GSE136831
GSM4058920	GSM4058920|Macrophage	Macrophage	Control	GSE136831
GSM4058921	GSM4058921|Epithelial_cells	Epithelial_cells	Control	GSE136831
GSM4058921	GSM4058921|Smooth_muscle_cells	Smooth_muscle_cells	Control	GSE136831
GSM4058921	GSM4058921|NK_cell	NK_cell	Control	GSE136831
GSM4058921	GSM4058921|Macrophage	Macrophage	Control	GSE136831
GSM4058922	GSM4058922|NK_cell	NK_cell	Control	GSE136831
GSM4058922	GSM4058922|Macrophage	Macrophage	Control	GSE136831
GSM4058922	GSM4058922|Epithelial_cells	Epithelial_cells	Control	GSE136831
GSM4058923	GSM4058923|NK_cell	NK_cell	Control	GSE136831
GSM4058923	GSM4058923|Smooth_muscle_cells	Smooth_muscle_cells	Control	GSE136831
GSM4058923	GSM4058923|Macrophage	Macrophage	Control	GSE136831
GSM4058923	GSM4058923|Epithelial_cells	Epithelial_cells	Control	GSE136831
GSM4058924	GSM4058924|NK_cell	NK_cell	Control	GSE136831
GSM4058924	GSM4058924|Macrophage	Macrophage	Control	GSE136831
GSM4058924	GSM4058924|Epithelial_cells	Epithelial_cells	Control	GSE136831
GSM4058925	GSM4058925|NK_cell	NK_cell	Control	GSE136831
GSM4058925	GSM4058925|Macrophage	Macrophage	Control	GSE136831
GSM4058925	GSM4058925|Epithelial_cells	Epithelial_cells	Control	GSE136831
GSM4058926	GSM4058926|Epithelial_cells	Epithelial_cells	Control	GSE136831
GSM4058926	GSM4058926|Smooth_muscle_cells	Smooth_muscle_cells	Control	GSE136831
GSM4058926	GSM4058926|Macrophage	Macrophage	Control	GSE136831
GSM4058926	GSM4058926|NK_cell	NK_cell	Control	GSE136831
GSM4058927	GSM4058927|Macrophage	Macrophage	Control	GSE136831
GSM4058927	GSM4058927|NK_cell	NK_cell	Control	GSE136831
GSM4058927	GSM4058927|Epithelial_cells	Epithelial_cells	Control	GSE136831
GSM4058947	GSM4058947|Macrophage	Macrophage	IPF	GSE136831
GSM4058947	GSM4058947|NK_cell	NK_cell	IPF	GSE136831
GSM4058947	GSM4058947|Epithelial_cells	Epithelial_cells	IPF	GSE136831
GSM4058947	GSM4058947|Smooth_muscle_cells	Smooth_muscle_cells	IPF	GSE136831
GSM4058948	GSM4058948|NK_cell	NK_cell	IPF	GSE136831
GSM4058948	GSM4058948|Macrophage	Macrophage	IPF	GSE136831
GSM4058948	GSM4058948|Epithelial_cells	Epithelial_cells	IPF	GSE136831
GSM4058948	GSM4058948|Smooth_muscle_cells	Smooth_muscle_cells	IPF	GSE136831
GSM4058949	GSM4058949|NK_cell	NK_cell	IPF	GSE136831
GSM4058949	GSM4058949|Epithelial_cells	Epithelial_cells	IPF	GSE136831
GSM4058949	GSM4058949|Macrophage	Macrophage	IPF	GSE136831
GSM4058950	GSM4058950|Smooth_muscle_cells	Smooth_muscle_cells	IPF	GSE136831
GSM4058950	GSM4058950|Macrophage	Macrophage	IPF	GSE136831
GSM4058950	GSM4058950|Epithelial_cells	Epithelial_cells	IPF	GSE136831
GSM4058950	GSM4058950|NK_cell	NK_cell	IPF	GSE136831
GSM4058951	GSM4058951|Smooth_muscle_cells	Smooth_muscle_cells	IPF	GSE136831
GSM4058951	GSM4058951|Epithelial_cells	Epithelial_cells	IPF	GSE136831
GSM4058951	GSM4058951|NK_cell	NK_cell	IPF	GSE136831
GSM4058951	GSM4058951|Macrophage	Macrophage	IPF	GSE136831
GSM4058952	GSM4058952|NK_cell	NK_cell	IPF	GSE136831
GSM4058952	GSM4058952|Epithelial_cells	Epithelial_cells	IPF	GSE136831
GSM4058952	GSM4058952|Smooth_muscle_cells	Smooth_muscle_cells	IPF	GSE136831
GSM4058952	GSM4058952|Macrophage	Macrophage	IPF	GSE136831
GSM4058953	GSM4058953|Smooth_muscle_cells	Smooth_muscle_cells	IPF	GSE136831
GSM4058953	GSM4058953|NK_cell	NK_cell	IPF	GSE136831
GSM4058953	GSM4058953|Macrophage	Macrophage	IPF	GSE136831
GSM4058953	GSM4058953|Epithelial_cells	Epithelial_cells	IPF	GSE136831
GSM4058954	GSM4058954|Epithelial_cells	Epithelial_cells	IPF	GSE136831
GSM4058954	GSM4058954|NK_cell	NK_cell	IPF	GSE136831
GSM4058954	GSM4058954|Macrophage	Macrophage	IPF	GSE136831
GSM4058954	GSM4058954|Smooth_muscle_cells	Smooth_muscle_cells	IPF	GSE136831
GSM4058955	GSM4058955|NK_cell	NK_cell	IPF	GSE136831
GSM4058955	GSM4058955|Macrophage	Macrophage	IPF	GSE136831
GSM4058955	GSM4058955|Epithelial_cells	Epithelial_cells	IPF	GSE136831
GSM4058955	GSM4058955|Smooth_muscle_cells	Smooth_muscle_cells	IPF	GSE136831
GSM4058956	GSM4058956|NK_cell	NK_cell	IPF	GSE136831
GSM4058956	GSM4058956|Macrophage	Macrophage	IPF	GSE136831
GSM4058956	GSM4058956|Epithelial_cells	Epithelial_cells	IPF	GSE136831
GSM4058957	GSM4058957|NK_cell	NK_cell	IPF	GSE136831
GSM4058957	GSM4058957|Smooth_muscle_cells	Smooth_muscle_cells	IPF	GSE136831
GSM4058957	GSM4058957|Epithelial_cells	Epithelial_cells	IPF	GSE136831
GSM4058957	GSM4058957|Macrophage	Macrophage	IPF	GSE136831
GSM4058958	GSM4058958|NK_cell	NK_cell	IPF	GSE136831
GSM4058958	GSM4058958|Smooth_muscle_cells	Smooth_muscle_cells	IPF	GSE136831
GSM4058958	GSM4058958|Epithelial_cells	Epithelial_cells	IPF	GSE136831
GSM4058958	GSM4058958|Macrophage	Macrophage	IPF	GSE136831
GSM4058959	GSM4058959|NK_cell	NK_cell	IPF	GSE136831
GSM4058959	GSM4058959|Epithelial_cells	Epithelial_cells	IPF	GSE136831
GSM4058959	GSM4058959|Smooth_muscle_cells	Smooth_muscle_cells	IPF	GSE136831
GSM4058959	GSM4058959|Macrophage	Macrophage	IPF	GSE136831
GSM4058960	GSM4058960|Macrophage	Macrophage	IPF	GSE136831
GSM4058960	GSM4058960|Epithelial_cells	Epithelial_cells	IPF	GSE136831
GSM4058960	GSM4058960|Smooth_muscle_cells	Smooth_muscle_cells	IPF	GSE136831
GSM4058960	GSM4058960|NK_cell	NK_cell	IPF	GSE136831
GSM4058961	GSM4058961|NK_cell	NK_cell	IPF	GSE136831
GSM4058961	GSM4058961|Epithelial_cells	Epithelial_cells	IPF	GSE136831
GSM4058961	GSM4058961|Macrophage	Macrophage	IPF	GSE136831
GSM4058962	GSM4058962|NK_cell	NK_cell	IPF	GSE136831
GSM4058962	GSM4058962|Macrophage	Macrophage	IPF	GSE136831
GSM4058962	GSM4058962|Epithelial_cells	Epithelial_cells	IPF	GSE136831
GSM4058962	GSM4058962|Smooth_muscle_cells	Smooth_muscle_cells	IPF	GSE136831
GSM4058963	GSM4058963|Macrophage	Macrophage	IPF	GSE136831
GSM4058963	GSM4058963|Epithelial_cells	Epithelial_cells	IPF	GSE136831
GSM4058963	GSM4058963|Smooth_muscle_cells	Smooth_muscle_cells	IPF	GSE136831
GSM4058963	GSM4058963|NK_cell	NK_cell	IPF	GSE136831
GSM4058964	GSM4058964|Macrophage	Macrophage	IPF	GSE136831
GSM4058964	GSM4058964|Epithelial_cells	Epithelial_cells	IPF	GSE136831
GSM4058964	GSM4058964|Smooth_muscle_cells	Smooth_muscle_cells	IPF	GSE136831
GSM4058964	GSM4058964|NK_cell	NK_cell	IPF	GSE136831
GSM4058965	GSM4058965|Epithelial_cells	Epithelial_cells	IPF	GSE136831
GSM4058965	GSM4058965|Smooth_muscle_cells	Smooth_muscle_cells	IPF	GSE136831
GSM4058965	GSM4058965|NK_cell	NK_cell	IPF	GSE136831
GSM4058965	GSM4058965|Macrophage	Macrophage	IPF	GSE136831
GSM4058966	GSM4058966|NK_cell	NK_cell	IPF	GSE136831
GSM4058966	GSM4058966|Smooth_muscle_cells	Smooth_muscle_cells	IPF	GSE136831
GSM4058966	GSM4058966|Macrophage	Macrophage	IPF	GSE136831
GSM4058966	GSM4058966|Epithelial_cells	Epithelial_cells	IPF	GSE136831
GSM4058967	GSM4058967|Macrophage	Macrophage	IPF	GSE136831
GSM4058967	GSM4058967|NK_cell	NK_cell	IPF	GSE136831
GSM4058967	GSM4058967|Epithelial_cells	Epithelial_cells	IPF	GSE136831
GSM4058967	GSM4058967|Smooth_muscle_cells	Smooth_muscle_cells	IPF	GSE136831
GSM4058968	GSM4058968|Epithelial_cells	Epithelial_cells	IPF	GSE136831
GSM4058968	GSM4058968|NK_cell	NK_cell	IPF	GSE136831
GSM4058968	GSM4058968|Smooth_muscle_cells	Smooth_muscle_cells	IPF	GSE136831
GSM4058968	GSM4058968|Macrophage	Macrophage	IPF	GSE136831
GSM4058969	GSM4058969|Epithelial_cells	Epithelial_cells	IPF	GSE136831
GSM4058969	GSM4058969|Smooth_muscle_cells	Smooth_muscle_cells	IPF	GSE136831
GSM4058969	GSM4058969|Macrophage	Macrophage	IPF	GSE136831
GSM4058969	GSM4058969|NK_cell	NK_cell	IPF	GSE136831
GSM4058970	GSM4058970|NK_cell	NK_cell	IPF	GSE136831
GSM4058970	GSM4058970|Smooth_muscle_cells	Smooth_muscle_cells	IPF	GSE136831
GSM4058970	GSM4058970|Epithelial_cells	Epithelial_cells	IPF	GSE136831
GSM4058970	GSM4058970|Macrophage	Macrophage	IPF	GSE136831
GSM4058971	GSM4058971|Macrophage	Macrophage	IPF	GSE136831
GSM4058971	GSM4058971|NK_cell	NK_cell	IPF	GSE136831
GSM4058971	GSM4058971|Epithelial_cells	Epithelial_cells	IPF	GSE136831
GSM4058971	GSM4058971|Smooth_muscle_cells	Smooth_muscle_cells	IPF	GSE136831
GSM4058972	GSM4058972|NK_cell	NK_cell	IPF	GSE136831
GSM4058972	GSM4058972|Epithelial_cells	Epithelial_cells	IPF	GSE136831
GSM4058972	GSM4058972|Macrophage	Macrophage	IPF	GSE136831
GSM4058972	GSM4058972|Smooth_muscle_cells	Smooth_muscle_cells	IPF	GSE136831
GSM4058973	GSM4058973|Macrophage	Macrophage	IPF	GSE136831
GSM4058973	GSM4058973|Smooth_muscle_cells	Smooth_muscle_cells	IPF	GSE136831
GSM4058973	GSM4058973|Epithelial_cells	Epithelial_cells	IPF	GSE136831
GSM4058973	GSM4058973|NK_cell	NK_cell	IPF	GSE136831
GSM4058974	GSM4058974|Smooth_muscle_cells	Smooth_muscle_cells	IPF	GSE136831
GSM4058974	GSM4058974|NK_cell	NK_cell	IPF	GSE136831
GSM4058974	GSM4058974|Epithelial_cells	Epithelial_cells	IPF	GSE136831
GSM4058974	GSM4058974|Macrophage	Macrophage	IPF	GSE136831
GSM4058975	GSM4058975|NK_cell	NK_cell	IPF	GSE136831
GSM4058975	GSM4058975|Epithelial_cells	Epithelial_cells	IPF	GSE136831
GSM4058975	GSM4058975|Macrophage	Macrophage	IPF	GSE136831
GSM4058975	GSM4058975|Smooth_muscle_cells	Smooth_muscle_cells	IPF	GSE136831
GSM4058976	GSM4058976|NK_cell	NK_cell	IPF	GSE136831
GSM4058976	GSM4058976|Epithelial_cells	Epithelial_cells	IPF	GSE136831
GSM4058976	GSM4058976|Macrophage	Macrophage	IPF	GSE136831
GSM4058976	GSM4058976|Smooth_muscle_cells	Smooth_muscle_cells	IPF	GSE136831
GSM4058977	GSM4058977|Epithelial_cells	Epithelial_cells	IPF	GSE136831
GSM4058977	GSM4058977|Macrophage	Macrophage	IPF	GSE136831
GSM4058977	GSM4058977|NK_cell	NK_cell	IPF	GSE136831
GSM4058977	GSM4058977|Smooth_muscle_cells	Smooth_muscle_cells	IPF	GSE136831

## Sheet: Table S3(GSE239664_sample_anno)
Table S3: The cell type in the GSE239664
sample_id	sample_celltype	celltype	condition	dataset
GSM7669640	GSM7669640|Endothelial_cells	Endothelial_cells	IPF	GSE239664
GSM7669640	GSM7669640|Tissue_stem_cells	Tissue_stem_cells	IPF	GSE239664
GSM7669640	GSM7669640|Macrophage	Macrophage	IPF	GSE239664
GSM7669640	GSM7669640|Epithelial_cells	Epithelial_cells	IPF	GSE239664
GSM7669640	GSM7669640|Smooth_muscle_cells	Smooth_muscle_cells	IPF	GSE239664
GSM7669641	GSM7669641|Tissue_stem_cells	Tissue_stem_cells	IPF	GSE239664
GSM7669641	GSM7669641|Smooth_muscle_cells	Smooth_muscle_cells	IPF	GSE239664
GSM7669641	GSM7669641|Macrophage	Macrophage	IPF	GSE239664
GSM7669641	GSM7669641|Endothelial_cells	Endothelial_cells	IPF	GSE239664
GSM7669641	GSM7669641|Epithelial_cells	Epithelial_cells	IPF	GSE239664
GSM7669643	GSM7669643|Epithelial_cells	Epithelial_cells	IPF	GSE239664
GSM7669643	GSM7669643|Tissue_stem_cells	Tissue_stem_cells	IPF	GSE239664
GSM7669643	GSM7669643|Macrophage	Macrophage	IPF	GSE239664
GSM7669643	GSM7669643|Endothelial_cells	Endothelial_cells	IPF	GSE239664
GSM7669643	GSM7669643|Smooth_muscle_cells	Smooth_muscle_cells	IPF	GSE239664
GSM7669644	GSM7669644|Smooth_muscle_cells	Smooth_muscle_cells	IPF	GSE239664
GSM7669644	GSM7669644|Macrophage	Macrophage	IPF	GSE239664
GSM7669644	GSM7669644|Epithelial_cells	Epithelial_cells	IPF	GSE239664
GSM7669644	GSM7669644|Endothelial_cells	Endothelial_cells	IPF	GSE239664
GSM7669645	GSM7669645|Macrophage	Macrophage	control	GSE239664
GSM7669645	GSM7669645|Fibroblasts	Fibroblasts	control	GSE239664
GSM7669645	GSM7669645|Smooth_muscle_cells	Smooth_muscle_cells	control	GSE239664
GSM7669645	GSM7669645|Epithelial_cells	Epithelial_cells	control	GSE239664
GSM7669645	GSM7669645|Endothelial_cells	Endothelial_cells	control	GSE239664
GSM7669637	GSM7669637|Smooth_muscle_cells	Smooth_muscle_cells	IPF	GSE239664
GSM7669637	GSM7669637|Epithelial_cells	Epithelial_cells	IPF	GSE239664
GSM7669638	GSM7669638|Tissue_stem_cells	Tissue_stem_cells	IPF	GSE239664
GSM7669638	GSM7669638|Smooth_muscle_cells	Smooth_muscle_cells	IPF	GSE239664
GSM7669638	GSM7669638|Epithelial_cells	Epithelial_cells	IPF	GSE239664
GSM7669638	GSM7669638|Neurons	Neurons	IPF	GSE239664
GSM7669639	GSM7669639|Tissue_stem_cells	Tissue_stem_cells	IPF	GSE239664
GSM7669639	GSM7669639|Epithelial_cells	Epithelial_cells	IPF	GSE239664
GSM7669639	GSM7669639|Smooth_muscle_cells	Smooth_muscle_cells	IPF	GSE239664
GSM7669642	GSM7669642|Smooth_muscle_cells	Smooth_muscle_cells	IPF	GSE239664
GSM7669642	GSM7669642|Epithelial_cells	Epithelial_cells	IPF	GSE239664
GSM7669642	GSM7669642|Tissue_stem_cells	Tissue_stem_cells	IPF	GSE239664
GSM7669646	GSM7669646|Epithelial_cells	Epithelial_cells	IPF	GSE239664
GSM7669646	GSM7669646|Smooth_muscle_cells	Smooth_muscle_cells	IPF	GSE239664
GSM7669646	GSM7669646|Macrophage	Macrophage	IPF	GSE239664

## Sheet: Table S3（GSE249513_sample_anno）
Table S3: The cell type in the GSE249513
Sample_id	sample_celltype	celltype	dataset	barcodes	condition
GSM7949203	GSM7949203|B_cell	B_cell	GSE249513	AGGTCCGGTACGCACC-1_1_1_1	control
GSM7949203	GSM7949203|B_cell	B_cell	GSE249513	AGGTCCGGTCTCAACA-1_1_1_1	control
GSM7949203	GSM7949203|B_cell	B_cell	GSE249513	AGGTCCGGTGCTCTTC-1_1_1_1	control
GSM7949203	GSM7949203|B_cell	B_cell	GSE249513	AGGTCCGTCCAAGCCG-1_1_1_1	control
GSM7949203	GSM7949203|B_cell	B_cell	GSE249513	AGGTCCGTCCCATTAT-1_1_1_1	control
GSM7949203	GSM7949203|B_cell	B_cell	GSE249513	AGGTCCGTCGAATGCT-1_1_1_1	control
GSM7949203	GSM7949203|B_cell	B_cell	GSE249513	AGGTCCGTCGACCAGC-1_1_1_1	control
GSM7949203	GSM7949203|B_cell	B_cell	GSE249513	AGGTCCGTCGAGAACG-1_1_1_1	control
GSM7949203	GSM7949203|B_cell	B_cell	GSE249513	AGTAGTCAGCGTTGCC-1_1_1_1	control
GSM7949203	GSM7949203|B_cell	B_cell	GSE249513	AGTAGTCCAGGCGATA-1_1_1_1	control
GSM7949203	GSM7949203|B_cell	B_cell	GSE249513	AGTAGTCGTCCCTACT-1_1_1_1	control
GSM7949203	GSM7949203|B_cell	B_cell	GSE249513	AGTCTTTAGGATGGAA-1_1_1_1	control
GSM7949203	GSM7949203|B_cell	B_cell	GSE249513	AGTCTTTCAAGAAGAG-1_1_1_1	control
GSM7949203	GSM7949203|B_cell	B_cell	GSE249513	AGTCTTTGTGTAAGTA-1_1_1_1	control
GSM7949203	GSM7949203|B_cell	B_cell	GSE249513	AGTCTTTGTTATCGGT-1_1_1_1	control
GSM7949203	GSM7949203|B_cell	B_cell	GSE249513	AGTCTTTGTTCAGTAC-1_1_1_1	control
GSM7949203	GSM7949203|B_cell	B_cell	GSE249513	AGTCTTTTCCCACTTG-1_1_1_1	control
GSM7949203	GSM7949203|B_cell	B_cell	GSE249513	AGTGAGGAGAGGTACC-1_1_1_1	control
GSM7949203	GSM7949203|B_cell	B_cell	GSE249513	AGTGAGGAGTACGATA-1_1_1_1	control
GSM7949203	GSM7949203|B_cell	B_cell	GSE249513	AGTGAGGAGTTCGCAT-1_1_1_1	control
GSM7949203	GSM7949203|B_cell	B_cell	GSE249513	AGTGAGGGTTTAGCTG-1_1_1_1	control
GSM7949203	GSM7949203|B_cell	B_cell	GSE249513	AGTGAGGTCCCGGATG-1_1_1_1	control
GSM7949203	GSM7949203|B_cell	B_cell	GSE249513	AGTGAGGTCTGTGCAA-1_1_1_1	control
GSM7949203	GSM7949203|B_cell	B_cell	GSE249513	AGTGGGAAGGAGTCTG-1_1_1_1	control
GSM7949203	GSM7949203|B_cell	B_cell	GSE249513	AGTGGGAAGTTAAGTG-1_1_1_1	control
GSM7949203	GSM7949203|B_cell	B_cell	GSE249513	AGTGGGACACGTTGGC-1_1_1_1	control
GSM7949203	GSM7949203|B_cell	B_cell	GSE249513	AGTGGGACAGACGCAA-1_1_1_1	control
GSM7949203	GSM7949203|B_cell	B_cell	GSE249513	AGTGGGACAGTTAACC-1_1_1_1	control
GSM7949203	GSM7949203|B_cell	B_cell	GSE249513	AGTGGGAGTAGTAGTA-1_1_1_1	control
GSM7949203	GSM7949203|B_cell	B_cell	GSE249513	AGTGGGATCAGCTTAG-1_1_1_1	control
GSM7949203	GSM7949203|B_cell	B_cell	GSE249513	AGTGTCACATAAAGGT-1_1_1_1	control
GSM7949203	GSM7949203|B_cell	B_cell	GSE249513	AGTGTCACATATACGC-1_1_1_1	control
GSM7949203	GSM7949203|B_cell	B_cell	GSE249513	AGTGTCAGTTCCTCCA-1_1_1_1	control
GSM7949203	GSM7949203|B_cell	B_cell	GSE249513	AGTGTCATCAGGTAAA-1_1_1_1	control
GSM7949203	GSM7949203|B_cell	B_cell	GSE249513	AGTGTCATCCCGGATG-1_1_1_1	control
GSM7949203	GSM7949203|B_cell	B_cell	GSE249513	AGTTGGTAGGCAGGTT-1_1_1_1	control
GSM7949203	GSM7949203|B_cell	B_cell	GSE249513	AGTTGGTAGTCCGGTC-1_1_1_1	control
GSM7949203	GSM7949203|B_cell	B_cell	GSE249513	AGTTGGTAGTGGTAGC-1_1_1_1	control
GSM7949203	GSM7949203|B_cell	B_cell	GSE249513	AGTTGGTGTATAAACG-1_1_1_1	control
GSM7949203	GSM7949203|B_cell	B_cell	GSE249513	AGTTGGTGTGGTCTCG-1_1_1_1	control
GSM7949203	GSM7949203|B_cell	B_cell	GSE249513	AGTTGGTGTGTCTGAT-1_1_1_1	control
GSM7949203	GSM7949203|B_cell	B_cell	GSE249513	AGTTGGTTCCAGGGCT-1_1_1_1	control
GSM7949203	GSM7949203|B_cell	B_cell	GSE249513	AGTTGGTTCTTCAACT-1_1_1_1	control
GSM7949203	GSM7949203|B_cell	B_cell	GSE249513	ATAACGCAGCGTTGCC-1_1_1_1	control
GSM7949203	GSM7949203|B_cell	B_cell	GSE249513	ATAACGCAGGCTATCT-1_1_1_1	control
GSM7949203	GSM7949203|B_cell	B_cell	GSE249513	ATAACGCAGGGATGGG-1_1_1_1	control
GSM7949203	GSM7949203|B_cell	B_cell	GSE249513	ATAACGCAGGTACTCT-1_1_1_1	control
GSM7949203	GSM7949203|B_cell	B_cell	GSE249513	ATAACGCAGTGAATTG-1_1_1_1	control
GSM7949203	GSM7949203|B_cell	B_cell	GSE249513	ATAACGCCATCTATGG-1_1_1_1	control
GSM7949203	GSM7949203|B_cell	B_cell	GSE249513	ATAACGCGTACTTCTT-1_1_1_1	control
GSM7949203	GSM7949203|B_cell	B_cell	GSE249513	ATAACGCGTCTAAACC-1_1_1_1	control
GSM7949203	GSM7949203|B_cell	B_cell	GSE249513	ATAACGCGTGGTAACG-1_1_1_1	control
GSM7949203	GSM7949203|B_cell	B_cell	GSE249513	ATAACGCGTTAGGGTG-1_1_1_1	control
GSM7949203	GSM7949203|B_cell	B_cell	GSE249513	ATAACGCGTTTGTTGG-1_1_1_1	control
GSM7949203	GSM7949203|B_cell	B_cell	GSE249513	ATAACGCTCGAGGTAG-1_1_1_1	control
GSM7949203	GSM7949203|B_cell	B_cell	GSE249513	ATAAGAGAGATGGGTC-1_1_1_1	control
GSM7949203	GSM7949203|B_cell	B_cell	GSE249513	ATAAGAGAGCCAGTAG-1_1_1_1	control
GSM7949203	GSM7949203|B_cell	B_cell	GSE249513	ATAAGAGAGTCCCACG-1_1_1_1	control
GSM7949203	GSM7949203|B_cell	B_cell	GSE249513	ATAAGAGCACGGTTTA-1_1_1_1	control
GSM7949203	GSM7949203|B_cell	B_cell	GSE249513	ATAAGAGTCCAGGGCT-1_1_1_1	control
GSM7949203	GSM7949203|B_cell	B_cell	GSE249513	ATAAGAGTCCGTTGTC-1_1_1_1	control
GSM7949203	GSM7949203|B_cell	B_cell	GSE249513	ATAAGAGTCTCACATT-1_1_1_1	control
GSM7949203	GSM7949203|B_cell	B_cell	GSE249513	ATAGACCAGCAACGGT-1_1_1_1	control
GSM7949203	GSM7949203|B_cell	B_cell	GSE249513	ATAGACCAGTGTTAGA-1_1_1_1	control
GSM7949203	GSM7949203|B_cell	B_cell	GSE249513	ATAGACCCAAACCCAT-1_1_1_1	control
GSM7949203	GSM7949203|B_cell	B_cell	GSE249513	ATAGACCCACCACGTG-1_1_1_1	control
GSM7949203	GSM7949203|B_cell	B_cell	GSE249513	ATAGACCGTCAAAGAT-1_1_1_1	control
GSM7949203	GSM7949203|B_cell	B_cell	GSE249513	ATAGACCGTCGCGGTT-1_1_1_1	control
GSM7949203	GSM7949203|B_cell	B_cell	GSE249513	ATAGACCTCCGCATAA-1_1_1_1	control
GSM7949203	GSM7949203|B_cell	B_cell	GSE249513	ATCACGAAGAAAGTGG-1_1_1_1	control
GSM7949203	GSM7949203|B_cell	B_cell	GSE249513	ATCACGAAGGAGCGTT-1_1_1_1	control
GSM7949203	GSM7949203|B_cell	B_cell	GSE249513	ATCACGAGTCCGAGTC-1_1_1_1	control
GSM7949203	GSM7949203|B_cell	B_cell	GSE249513	ATCACGAGTGGCCCTA-1_1_1_1	control
GSM7949203	GSM7949203|B_cell	B_cell	GSE249513	ATCACGAGTTGGGACA-1_1_1_1	control
GSM7949203	GSM7949203|B_cell	B_cell	GSE249513	ATCATCTAGATCACGG-1_1_1_1	control
GSM7949203	GSM7949203|B_cell	B_cell	GSE249513	ATCATCTAGCTGCAAG-1_1_1_1	control
GSM7949203	GSM7949203|B_cell	B_cell	GSE249513	ATCATCTAGGACATTA-1_1_1_1	control
GSM7949203	GSM7949203|B_cell	B_cell	GSE249513	ATCATCTAGTCGCCGT-1_1_1_1	control
GSM7949203	GSM7949203|B_cell	B_cell	GSE249513	ATCATCTCACAGCCCA-1_1_1_1	control
GSM7949203	GSM7949203|B_cell	B_cell	GSE249513	ATCATCTCACATCCAA-1_1_1_1	control
GSM7949203	GSM7949203|B_cell	B_cell	GSE249513	ATCATCTGTGGTACAG-1_1_1_1	control
GSM7949203	GSM7949203|B_cell	B_cell	GSE249513	ATCATCTTCCGTACAA-1_1_1_1	control
GSM7949203	GSM7949203|B_cell	B_cell	GSE249513	ATCATCTTCCTTGACC-1_1_1_1	control
GSM7949203	GSM7949203|B_cell	B_cell	GSE249513	ATCATGGAGCTGCGAA-1_1_1_1	control
GSM7949203	GSM7949203|B_cell	B_cell	GSE249513	ATCATGGCAAACTGCT-1_1_1_1	control
GSM7949203	GSM7949203|B_cell	B_cell	GSE249513	ATCATGGGTAGCGTAG-1_1_1_1	control
GSM7949203	GSM7949203|B_cell	B_cell	GSE249513	ATCATGGGTTATGTGC-1_1_1_1	control
GSM7949203	GSM7949203|B_cell	B_cell	GSE249513	ATCATGGTCAGTGTTG-1_1_1_1	control
GSM7949203	GSM7949203|B_cell	B_cell	GSE249513	ATCATGGTCCAGTATG-1_1_1_1	control
GSM7949203	GSM7949203|B_cell	B_cell	GSE249513	ATCATGGTCTTCGGTC-1_1_1_1	control
GSM7949203	GSM7949203|B_cell	B_cell	GSE249513	ATCCACCAGATGTGTA-1_1_1_1	control
GSM7949203	GSM7949203|B_cell	B_cell	GSE249513	ATCCACCAGCAGGCTA-1_1_1_1	control
GSM7949203	GSM7949203|B_cell	B_cell	GSE249513	ATCCACCAGTGATCGG-1_1_1_1	control
GSM7949203	GSM7949203|B_cell	B_cell	GSE249513	ATCCACCAGTGTACGG-1_1_1_1	control
GSM7949203	GSM7949203|B_cell	B_cell	GSE249513	ATCCACCCACGTCTCT-1_1_1_1	control
GSM7949203	GSM7949203|B_cell	B_cell	GSE249513	ATCCACCCATACGCTA-1_1_1_1	control
GSM7949203	GSM7949203|B_cell	B_cell	GSE249513	ATCCACCCATGGTCTA-1_1_1_1	control
GSM7949203	GSM7949203|B_cell	B_cell	GSE249513	ATCCACCGTAAATGTG-1_1_1_1	control
GSM7949203	GSM7949203|B_cell	B_cell	GSE249513	ATCCACCGTGATAAGT-1_1_1_1	control
GSM7949203	GSM7949203|B_cell	B_cell	GSE249513	ATCCACCTCCTGTAGA-1_1_1_1	control
GSM7949203	GSM7949203|B_cell	B_cell	GSE249513	ATCCGAAAGACCCACC-1_1_1_1	control
GSM7949203	GSM7949203|B_cell	B_cell	GSE249513	ATCCGAAAGGCAATTA-1_1_1_1	control
GSM7949203	GSM7949203|B_cell	B_cell	GSE249513	ATCCGAAAGTGACATA-1_1_1_1	control
GSM7949203	GSM7949203|B_cell	B_cell	GSE249513	ATCCGAACAAAGGTGC-1_1_1_1	control
GSM7949203	GSM7949203|B_cell	B_cell	GSE249513	ATCCGAACACTAAGTC-1_1_1_1	control
GSM7949203	GSM7949203|B_cell	B_cell	GSE249513	ATCCGAAGTAAAGTCA-1_1_1_1	control
GSM7949203	GSM7949203|B_cell	B_cell	GSE249513	ATCCGAAGTAGGCTGA-1_1_1_1	control
GSM7949203	GSM7949203|B_cell	B_cell	GSE249513	ATCCGAAGTCCAGTTA-1_1_1_1	control
GSM7949203	GSM7949203|B_cell	B_cell	GSE249513	ATCCGAAGTCCCGACA-1_1_1_1	control
GSM7949203	GSM7949203|B_cell	B_cell	GSE249513	ATCCGAAGTCTCCATC-1_1_1_1	control
GSM7949203	GSM7949203|B_cell	B_cell	GSE249513	ATCCGAAGTTGGTAAA-1_1_1_1	control
GSM7949203	GSM7949203|B_cell	B_cell	GSE249513	ATCCGAATCTTTACGT-1_1_1_1	control
GSM7949203	GSM7949203|B_cell	B_cell	GSE249513	ATCGAGTAGTGTACGG-1_1_1_1	control
GSM7949203	GSM7949203|B_cell	B_cell	GSE249513	ATCGAGTCAAACTGCT-1_1_1_1	control
GSM7949203	GSM7949203|B_cell	B_cell	GSE249513	ATCGAGTCAGGCTCAC-1_1_1_1	control
GSM7949203	GSM7949203|B_cell	B_cell	GSE249513	ATCGAGTTCTGCGACG-1_1_1_1	control
GSM7949203	GSM7949203|B_cell	B_cell	GSE249513	ATCGAGTTCTTTACGT-1_1_1_1	control
GSM7949203	GSM7949203|B_cell	B_cell	GSE249513	ATCTACTAGAATTGTG-1_1_1_1	control
GSM7949203	GSM7949203|B_cell	B_cell	GSE249513	ATCTACTAGGCAGGTT-1_1_1_1	control
GSM7949203	GSM7949203|B_cell	B_cell	GSE249513	ATCTACTCACAAGCCC-1_1_1_1	control
GSM7949203	GSM7949203|B_cell	B_cell	GSE249513	ATCTACTGTACCGTAT-1_1_1_1	control
GSM7949203	GSM7949203|B_cell	B_cell	GSE249513	ATCTACTGTCCTCTTG-1_1_1_1	control
GSM7949203	GSM7949203|B_cell	B_cell	GSE249513	ATCTGCCAGGGATACC-1_1_1_1	control
GSM7949203	GSM7949203|B_cell	B_cell	GSE249513	ATCTGCCCAATGGAAT-1_1_1_1	control
GSM7949203	GSM7949203|B_cell	B_cell	GSE249513	ATCTGCCCAGCTGCAC-1_1_1_1	control
GSM7949203	GSM7949203|B_cell	B_cell	GSE249513	ATCTGCCGTACAGCAG-1_1_1_1	control
GSM7949203	GSM7949203|B_cell	B_cell	GSE249513	ATCTGCCGTACAGTTC-1_1_1_1	control
GSM7949203	GSM7949203|B_cell	B_cell	GSE249513	ATCTGCCGTACTCGCG-1_1_1_1	control
GSM7949203	GSM7949203|B_cell	B_cell	GSE249513	ATCTGCCGTCAGAAGC-1_1_1_1	control
GSM7949203	GSM7949203|B_cell	B_cell	GSE249513	ATGAGGGCATACGCTA-1_1_1_1	control
GSM7949203	GSM7949203|B_cell	B_cell	GSE249513	ATGAGGGCATATGAGA-1_1_1_1	control
GSM7949203	GSM7949203|B_cell	B_cell	GSE249513	ATGAGGGCATGGGACA-1_1_1_1	control
GSM7949203	GSM7949203|B_cell	B_cell	GSE249513	ATGAGGGGTAGGACAC-1_1_1_1	control
GSM7949203	GSM7949203|B_cell	B_cell	GSE249513	ATGAGGGGTCCGTCAG-1_1_1_1	control
GSM7949203	GSM7949203|B_cell	B_cell	GSE249513	ATGAGGGGTCTAGTGT-1_1_1_1	control
GSM7949203	GSM7949203|B_cell	B_cell	GSE249513	ATGAGGGGTGATGCCC-1_1_1_1	control
GSM7949203	GSM7949203|B_cell	B_cell	GSE249513	ATGAGGGTCAAAGTAG-1_1_1_1	control
GSM7949203	GSM7949203|B_cell	B_cell	GSE249513	ATGAGGGTCAACCAAC-1_1_1_1	control
GSM7949203	GSM7949203|B_cell	B_cell	GSE249513	ATGAGGGTCAATCTCT-1_1_1_1	control
GSM7949203	GSM7949203|B_cell	B_cell	GSE249513	ATGAGGGTCGTAGATC-1_1_1_1	control
GSM7949203	GSM7949203|B_cell	B_cell	GSE249513	ATGAGGGTCTGCTGCT-1_1_1_1	control
GSM7949203	GSM7949203|B_cell	B_cell	GSE249513	ATGCGATAGAACTCGG-1_1_1_1	control
GSM7949203	GSM7949203|B_cell	B_cell	GSE249513	ATGCGATCAAACCCAT-1_1_1_1	control
GSM7949203	GSM7949203|B_cell	B_cell	GSE249513	ATGCGATCATCTGGTA-1_1_1_1	control
GSM7949203	GSM7949203|B_cell	B_cell	GSE249513	ATGCGATGTGACAAAT-1_1_1_1	control
GSM7949203	GSM7949203|B_cell	B_cell	GSE249513	ATGCGATTCACATGCA-1_1_1_1	control
GSM7949203	GSM7949203|B_cell	B_cell	GSE249513	ATGCGATTCGTCCAGG-1_1_1_1	control
GSM7949203	GSM7949203|B_cell	B_cell	GSE249513	ATGGGAGAGCTGATAA-1_1_1_1	control
GSM7949203	GSM7949203|B_cell	B_cell	GSE249513	ATGGGAGAGTGACTCT-1_1_1_1	control
GSM7949203	GSM7949203|B_cell	B_cell	GSE249513	ATGGGAGGTCAGCTAT-1_1_1_1	control
GSM7949203	GSM7949203|B_cell	B_cell	GSE249513	ATGGGAGGTCGCTTTC-1_1_1_1	control
GSM7949203	GSM7949203|B_cell	B_cell	GSE249513	ATGGGAGGTTCTGGTA-1_1_1_1	control
GSM7949203	GSM7949203|B_cell	B_cell	GSE249513	ATGGGAGTCACAAACC-1_1_1_1	control
GSM7949203	GSM7949203|B_cell	B_cell	GSE249513	ATGGGAGTCGGTCCGA-1_1_1_1	control
GSM7949203	GSM7949203|B_cell	B_cell	GSE249513	ATGGGAGTCTTGCAAG-1_1_1_1	control
GSM7949203	GSM7949203|B_cell	B_cell	GSE249513	ATGTGTGAGAGAGCTC-1_1_1_1	control
GSM7949203	GSM7949203|B_cell	B_cell	GSE249513	ATGTGTGAGCGATTCT-1_1_1_1	control
GSM7949203	GSM7949203|B_cell	B_cell	GSE249513	ATGTGTGAGTTAGGTA-1_1_1_1	control
GSM7949203	GSM7949203|B_cell	B_cell	GSE249513	ATGTGTGCAACAACCT-1_1_1_1	control
GSM7949203	GSM7949203|B_cell	B_cell	GSE249513	ATGTGTGCAATGAAAC-1_1_1_1	control
GSM7949203	GSM7949203|B_cell	B_cell	GSE249513	ATGTGTGCACCCATTC-1_1_1_1	control
GSM7949203	GSM7949203|B_cell	B_cell	GSE249513	ATGTGTGCACTGCCAG-1_1_1_1	control
GSM7949203	GSM7949203|B_cell	B_cell	GSE249513	ATGTGTGCAGCTCGCA-1_1_1_1	control
GSM7949203	GSM7949203|B_cell	B_cell	GSE249513	ATGTGTGCATATGCTG-1_1_1_1	control
GSM7949203	GSM7949203|B_cell	B_cell	GSE249513	ATGTGTGGTCCCTACT-1_1_1_1	control
GSM7949203	GSM7949203|B_cell	B_cell	GSE249513	ATGTGTGGTCTCCACT-1_1_1_1	control
GSM7949203	GSM7949203|B_cell	B_cell	GSE249513	ATTACTCAGGGTATCG-1_1_1_1	control
GSM7949203	GSM7949203|B_cell	B_cell	GSE249513	ATTACTCAGGGTTTCT-1_1_1_1	control
GSM7949203	GSM7949203|B_cell	B_cell	GSE249513	ATTACTCCAACTGCGC-1_1_1_1	control
GSM7949203	GSM7949203|B_cell	B_cell	GSE249513	ATTACTCCAGGCGATA-1_1_1_1	control
GSM7949203	GSM7949203|B_cell	B_cell	GSE249513	ATTACTCGTTACCGAT-1_1_1_1	control
GSM7949203	GSM7949203|B_cell	B_cell	GSE249513	ATTACTCTCTGCAAGT-1_1_1_1	control
GSM7949203	GSM7949203|B_cell	B_cell	GSE249513	ATTACTCTCTGGAGCC-1_1_1_1	control
GSM7949203	GSM7949203|B_cell	B_cell	GSE249513	ATTACTCTCTTAGCCC-1_1_1_1	control
GSM7949203	GSM7949203|B_cell	B_cell	GSE249513	ATTACTCTCTTCGGTC-1_1_1_1	control
GSM7949203	GSM7949203|B_cell	B_cell	GSE249513	ATTATCCAGAGCTGGT-1_1_1_1	control
GSM7949203	GSM7949203|B_cell	B_cell	GSE249513	ATTATCCAGCGTTCCG-1_1_1_1	control
GSM7949203	GSM7949203|B_cell	B_cell	GSE249513	ATTATCCAGCTATGCT-1_1_1_1	control
GSM7949203	GSM7949203|B_cell	B_cell	GSE249513	ATTATCCCATAAGACA-1_1_1_1	control
GSM7949203	GSM7949203|B_cell	B_cell	GSE249513	ATTATCCGTGGTGTAG-1_1_1_1	control
GSM7949203	GSM7949203|B_cell	B_cell	GSE249513	ATTATCCTCCATGAGT-1_1_1_1	control
GSM7949203	GSM7949203|B_cell	B_cell	GSE249513	ATTATCCTCCGTACAA-1_1_1_1	control
GSM7949203	GSM7949203|B_cell	B_cell	GSE249513	ATTCTACAGAGGTAGA-1_1_1_1	control
GSM7949203	GSM7949203|B_cell	B_cell	GSE249513	ATTCTACAGCTGCCCA-1_1_1_1	control
GSM7949203	GSM7949203|B_cell	B_cell	GSE249513	ATTCTACAGGGCTCTC-1_1_1_1	control
GSM7949203	GSM7949203|B_cell	B_cell	GSE249513	ATTCTACCAATGACCT-1_1_1_1	control
GSM7949203	GSM7949203|B_cell	B_cell	GSE249513	ATTCTACCACACATGT-1_1_1_1	control
GSM7949203	GSM7949203|B_cell	B_cell	GSE249513	ATTCTACCATGCCCGA-1_1_1_1	control
GSM7949203	GSM7949203|B_cell	B_cell	GSE249513	ATTCTACGTCATACTG-1_1_1_1	control
GSM7949203	GSM7949203|B_cell	B_cell	GSE249513	ATTCTACGTTCTGTTT-1_1_1_1	control
GSM7949203	GSM7949203|B_cell	B_cell	GSE249513	ATTGGACAGAACAATC-1_1_1_1	control
GSM7949203	GSM7949203|B_cell	B_cell	GSE249513	ATTGGACAGCCACGCT-1_1_1_1	control
GSM7949203	GSM7949203|B_cell	B_cell	GSE249513	ATTGGACAGCCCAGCT-1_1_1_1	control
GSM7949203	GSM7949203|B_cell	B_cell	GSE249513	ATTGGACAGTGTTTGC-1_1_1_1	control
GSM7949203	GSM7949203|B_cell	B_cell	GSE249513	ATTGGACCAATGTAAG-1_1_1_1	control
GSM7949203	GSM7949203|B_cell	B_cell	GSE249513	ATTGGACCACTAAGTC-1_1_1_1	control
GSM7949203	GSM7949203|B_cell	B_cell	GSE249513	ATTGGACCAGCTCCGA-1_1_1_1	control
GSM7949203	GSM7949203|B_cell	B_cell	GSE249513	ATTGGACCATTCGACA-1_1_1_1	control
GSM7949203	GSM7949203|B_cell	B_cell	GSE249513	ATTGGACGTCGGCATC-1_1_1_1	control
GSM7949203	GSM7949203|B_cell	B_cell	GSE249513	ATTGGACTCTCGTATT-1_1_1_1	control
GSM7949203	GSM7949203|B_cell	B_cell	GSE249513	ATTGGTGAGACAGAGA-1_1_1_1	control
GSM7949203	GSM7949203|B_cell	B_cell	GSE249513	ATTGGTGAGATACACA-1_1_1_1	control
GSM7949203	GSM7949203|B_cell	B_cell	GSE249513	ATTGGTGAGTGGCACA-1_1_1_1	control
GSM7949203	GSM7949203|B_cell	B_cell	GSE249513	ATTGGTGAGTTCGCAT-1_1_1_1	control
GSM7949203	GSM7949203|B_cell	B_cell	GSE249513	ATTGGTGCAATTGCTG-1_1_1_1	control
GSM7949203	GSM7949203|B_cell	B_cell	GSE249513	ATTGGTGCATGCCCGA-1_1_1_1	control
GSM7949203	GSM7949203|B_cell	B_cell	GSE249513	ATTGGTGCATGGTCAT-1_1_1_1	control
GSM7949203	GSM7949203|B_cell	B_cell	GSE249513	ATTGGTGGTCGCATCG-1_1_1_1	control
GSM7949203	GSM7949203|B_cell	B_cell	GSE249513	ATTGGTGGTCGGCTCA-1_1_1_1	control
GSM7949203	GSM7949203|B_cell	B_cell	GSE249513	ATTGGTGGTTGATTGC-1_1_1_1	control
GSM7949203	GSM7949203|B_cell	B_cell	GSE249513	ATTGGTGTCAACTCTT-1_1_1_1	control
GSM7949203	GSM7949203|B_cell	B_cell	GSE249513	ATTGGTGTCAGCGATT-1_1_1_1	control
GSM7949203	GSM7949203|B_cell	B_cell	GSE249513	ATTGGTGTCGCGATCG-1_1_1_1	control
GSM7949203	GSM7949203|B_cell	B_cell	GSE249513	ATTTCTGAGAGGTAGA-1_1_1_1	control
GSM7949203	GSM7949203|B_cell	B_cell	GSE249513	ATTTCTGAGGATGTAT-1_1_1_1	control
GSM7949203	GSM7949203|B_cell	B_cell	GSE249513	ATTTCTGCAAGACACG-1_1_1_1	control
GSM7949203	GSM7949203|B_cell	B_cell	GSE249513	ATTTCTGGTCTGATCA-1_1_1_1	control
GSM7949203	GSM7949203|B_cell	B_cell	GSE249513	ATTTCTGGTGATGTCT-1_1_1_1	control
GSM7949203	GSM7949203|B_cell	B_cell	GSE249513	ATTTCTGGTGTGGTTT-1_1_1_1	control
GSM7949203	GSM7949203|B_cell	B_cell	GSE249513	ATTTCTGGTTATGTGC-1_1_1_1	control
GSM7949203	GSM7949203|B_cell	B_cell	GSE249513	ATTTCTGTCAGATAAG-1_1_1_1	control
GSM7949203	GSM7949203|B_cell	B_cell	GSE249513	CAACCAAAGAAACGCC-1_1_1_1	control
GSM7949203	GSM7949203|B_cell	B_cell	GSE249513	CAACCAACAACCGCCA-1_1_1_1	control
GSM7949203	GSM7949203|B_cell	B_cell	GSE249513	CAACCAACACAGCCCA-1_1_1_1	control
GSM7949203	GSM7949203|B_cell	B_cell	GSE249513	CAACCAACATGAGCGA-1_1_1_1	control
GSM7949203	GSM7949203|B_cell	B_cell	GSE249513	CAACCAAGTAACGCGA-1_1_1_1	control
GSM7949203	GSM7949203|B_cell	B_cell	GSE249513	CAACCAAGTTCAGCGC-1_1_1_1	control
GSM7949203	GSM7949203|B_cell	B_cell	GSE249513	CAACCAAGTTTGTGTG-1_1_1_1	control
GSM7949203	GSM7949203|B_cell	B_cell	GSE249513	CAACCTCAGGGATGGG-1_1_1_1	control
GSM7949203	GSM7949203|B_cell	B_cell	GSE249513	CAACCTCAGGTAGCCA-1_1_1_1	control
GSM7949203	GSM7949203|B_cell	B_cell	GSE249513	CAACCTCGTCCGAATT-1_1_1_1	control
GSM7949203	GSM7949203|B_cell	B_cell	GSE249513	CAACCTCGTCTACCTC-1_1_1_1	control
GSM7949203	GSM7949203|B_cell	B_cell	GSE249513	CAACCTCGTCTCCATC-1_1_1_1	control
GSM7949203	GSM7949203|B_cell	B_cell	GSE249513	CAACCTCGTCTTCTCG-1_1_1_1	control
GSM7949203	GSM7949203|B_cell	B_cell	GSE249513	CAACCTCTCTCCTATA-1_1_1_1	control
GSM7949203	GSM7949203|B_cell	B_cell	GSE249513	CAACCTCTCTGCGTAA-1_1_1_1	control
GSM7949203	GSM7949203|B_cell	B_cell	GSE249513	CAACCTCTCTTGAGGT-1_1_1_1	control
GSM7949203	GSM7949203|B_cell	B_cell	GSE249513	CAACTAGAGCCACGCT-1_1_1_1	control
GSM7949203	GSM7949203|B_cell	B_cell	GSE249513	CAACTAGAGGCAAAGA-1_1_1_1	control
GSM7949203	GSM7949203|B_cell	B_cell	GSE249513	CAACTAGAGTGCAAGC-1_1_1_1	control
GSM7949203	GSM7949203|B_cell	B_cell	GSE249513	CAACTAGCACCAGGTC-1_1_1_1	control
GSM7949203	GSM7949203|B_cell	B_cell	GSE249513	CAACTAGCACTCAGGC-1_1_1_1	control
GSM7949203	GSM7949203|B_cell	B_cell	GSE249513	CAACTAGGTTTAGCTG-1_1_1_1	control
GSM7949203	GSM7949203|B_cell	B_cell	GSE249513	CAACTAGTCAGCTTAG-1_1_1_1	control
GSM7949203	GSM7949203|B_cell	B_cell	GSE249513	CAACTAGTCGTCCAGG-1_1_1_1	control
GSM7949203	GSM7949203|B_cell	B_cell	GSE249513	CAAGAAAAGCCACGCT-1_1_1_1	control
GSM7949203	GSM7949203|B_cell	B_cell	GSE249513	CAAGAAAAGCTAACAA-1_1_1_1	control
GSM7949203	GSM7949203|B_cell	B_cell	GSE249513	CAAGAAAAGTAGATGT-1_1_1_1	control
GSM7949203	GSM7949203|B_cell	B_cell	GSE249513	CAAGAAACAATTGCTG-1_1_1_1	control
GSM7949203	GSM7949203|B_cell	B_cell	GSE249513	CAAGAAACAGACACTT-1_1_1_1	control
GSM7949203	GSM7949203|B_cell	B_cell	GSE249513	CAAGAAAGTCCAGTGC-1_1_1_1	control
GSM7949203	GSM7949203|B_cell	B_cell	GSE249513	CAAGAAAGTCGACTGC-1_1_1_1	control
GSM7949203	GSM7949203|B_cell	B_cell	GSE249513	CAAGAAAGTCGGGTCT-1_1_1_1	control
GSM7949203	GSM7949203|B_cell	B_cell	GSE249513	CAAGATCAGTGTCCAT-1_1_1_1	control
GSM7949203	GSM7949203|B_cell	B_cell	GSE249513	CAAGATCCAATGTTGC-1_1_1_1	control
GSM7949203	GSM7949203|B_cell	B_cell	GSE249513	CAAGATCCACCTGGTG-1_1_1_1	control
GSM7949203	GSM7949203|B_cell	B_cell	GSE249513	CAAGATCGTCTAAACC-1_1_1_1	control
GSM7949203	GSM7949203|B_cell	B_cell	GSE249513	CAAGATCGTTCACGGC-1_1_1_1	control
GSM7949203	GSM7949203|B_cell	B_cell	GSE249513	CAAGATCTCCCACTTG-1_1_1_1	control
GSM7949203	GSM7949203|B_cell	B_cell	GSE249513	CAAGGCCGTAGCACGA-1_1_1_1	control
GSM7949203	GSM7949203|B_cell	B_cell	GSE249513	CAAGGCCGTCAAAGCG-1_1_1_1	control
GSM7949203	GSM7949203|B_cell	B_cell	GSE249513	CAAGGCCGTTTAAGCC-1_1_1_1	control
GSM7949203	GSM7949203|B_cell	B_cell	GSE249513	CAAGGCCTCACAACGT-1_1_1_1	control
GSM7949203	GSM7949203|B_cell	B_cell	GSE249513	CAAGGCCTCTCTAGGA-1_1_1_1	control
GSM7949203	GSM7949203|B_cell	B_cell	GSE249513	CAAGTTGAGTCAAGCG-1_1_1_1	control
GSM7949203	GSM7949203|B_cell	B_cell	GSE249513	CAAGTTGCAAGCCGTC-1_1_1_1	control
GSM7949203	GSM7949203|B_cell	B_cell	GSE249513	CAAGTTGCAAGGTGTG-1_1_1_1	control
GSM7949203	GSM7949203|B_cell	B_cell	GSE249513	CAAGTTGCAAGTTCTG-1_1_1_1	control
GSM7949203	GSM7949203|B_cell	B_cell	GSE249513	CAAGTTGCAGTATCTG-1_1_1_1	control
GSM7949203	GSM7949203|B_cell	B_cell	GSE249513	CAAGTTGCATCCCACT-1_1_1_1	control
GSM7949203	GSM7949203|B_cell	B_cell	GSE249513	CAAGTTGGTAAATGAC-1_1_1_1	control
GSM7949203	GSM7949203|B_cell	B_cell	GSE249513	CAAGTTGGTACCCAAT-1_1_1_1	control
GSM7949203	GSM7949203|B_cell	B_cell	GSE249513	CAAGTTGGTGCATCTA-1_1_1_1	control
GSM7949203	GSM7949203|B_cell	B_cell	GSE249513	CAAGTTGTCATCTGTT-1_1_1_1	control
GSM7949203	GSM7949203|B_cell	B_cell	GSE249513	CACAAACAGCGAAGGG-1_1_1_1	control
GSM7949203	GSM7949203|B_cell	B_cell	GSE249513	CACAAACAGCTAGTCT-1_1_1_1	control
GSM7949203	GSM7949203|B_cell	B_cell	GSE249513	CACAAACAGGGTTCCC-1_1_1_1	control
GSM7949203	GSM7949203|B_cell	B_cell	GSE249513	CACAAACCAAGCCATT-1_1_1_1	control
GSM7949203	GSM7949203|B_cell	B_cell	GSE249513	CACAAACCACTAAGTC-1_1_1_1	control
GSM7949203	GSM7949203|B_cell	B_cell	GSE249513	CACAAACCAGGTCTCG-1_1_1_1	control
GSM7949203	GSM7949203|B_cell	B_cell	GSE249513	CACAAACCATGCCTTC-1_1_1_1	control
GSM7949203	GSM7949203|B_cell	B_cell	GSE249513	CACAAACCATGTCCTC-1_1_1_1	control
GSM7949203	GSM7949203|B_cell	B_cell	GSE249513	CACAAACGTGGCTCCA-1_1_1_1	control
GSM7949203	GSM7949203|B_cell	B_cell	GSE249513	CACAAACGTTCTGTTT-1_1_1_1	control
GSM7949203	GSM7949203|B_cell	B_cell	GSE249513	CACACAAAGAAGGTGA-1_1_1_1	control
GSM7949203	GSM7949203|B_cell	B_cell	GSE249513	CACACAAAGAGTGAGA-1_1_1_1	control
GSM7949203	GSM7949203|B_cell	B_cell	GSE249513	CACACAAAGCCGTCGT-1_1_1_1	control
GSM7949203	GSM7949203|B_cell	B_cell	GSE249513	CACACAAGTCTTGTCC-1_1_1_1	control
GSM7949203	GSM7949203|B_cell	B_cell	GSE249513	CACACAATCGGATGTT-1_1_1_1	control
GSM7949203	GSM7949203|B_cell	B_cell	GSE249513	CACACCTAGCGGCTTC-1_1_1_1	control
GSM7949203	GSM7949203|B_cell	B_cell	GSE249513	CACACCTAGGCATGTG-1_1_1_1	control
GSM7949203	GSM7949203|B_cell	B_cell	GSE249513	CACACCTCACGGTGTC-1_1_1_1	control
GSM7949203	GSM7949203|B_cell	B_cell	GSE249513	CACACCTCACTAGTAC-1_1_1_1	control
GSM7949203	GSM7949203|B_cell	B_cell	GSE249513	CACACCTCATTTGCTT-1_1_1_1	control
GSM7949203	GSM7949203|B_cell	B_cell	GSE249513	CACACCTGTAGAGGAA-1_1_1_1	control
GSM7949203	GSM7949203|B_cell	B_cell	GSE249513	CACACCTGTAGTACCT-1_1_1_1	control
GSM7949203	GSM7949203|B_cell	B_cell	GSE249513	CACACCTGTGTTCGAT-1_1_1_1	control
GSM7949203	GSM7949203|B_cell	B_cell	GSE249513	CACACCTTCAGCGACC-1_1_1_1	control
GSM7949203	GSM7949203|B_cell	B_cell	GSE249513	CACACCTTCCACGCAG-1_1_1_1	control
GSM7949203	GSM7949203|B_cell	B_cell	GSE249513	CACACCTTCCGGGTGT-1_1_1_1	control
GSM7949203	GSM7949203|B_cell	B_cell	GSE249513	CACACCTTCCTTGACC-1_1_1_1	control
GSM7949203	GSM7949203|B_cell	B_cell	GSE249513	CACACCTTCGTTACGA-1_1_1_1	control
GSM7949203	GSM7949203|B_cell	B_cell	GSE249513	CACACTCAGAGCTGCA-1_1_1_1	control
GSM7949203	GSM7949203|B_cell	B_cell	GSE249513	CACACTCAGCACCGTC-1_1_1_1	control
GSM7949203	GSM7949203|B_cell	B_cell	GSE249513	CACACTCAGCGTAATA-1_1_1_1	control
GSM7949203	GSM7949203|B_cell	B_cell	GSE249513	CACACTCAGGCATTGG-1_1_1_1	control
GSM7949203	GSM7949203|B_cell	B_cell	GSE249513	CACACTCAGGCTAGCA-1_1_1_1	control
GSM7949203	GSM7949203|B_cell	B_cell	GSE249513	CACACTCCAAACCTAC-1_1_1_1	control
GSM7949203	GSM7949203|B_cell	B_cell	GSE249513	CACACTCCAAGCGTAG-1_1_1_1	control
GSM7949203	GSM7949203|B_cell	B_cell	GSE249513	CACACTCCAATGTAAG-1_1_1_1	control
GSM7949203	GSM7949203|B_cell	B_cell	GSE249513	CACACTCCAGTAACGG-1_1_1_1	control
GSM7949203	GSM7949203|B_cell	B_cell	GSE249513	CACACTCCATGCCTAA-1_1_1_1	control
GSM7949203	GSM7949203|B_cell	B_cell	GSE249513	CACACTCGTAACGTTC-1_1_1_1	control
GSM7949203	GSM7949203|B_cell	B_cell	GSE249513	CACACTCGTAGCTGCC-1_1_1_1	control
GSM7949203	GSM7949203|B_cell	B_cell	GSE249513	CACACTCGTATGGTTC-1_1_1_1	control
GSM7949203	GSM7949203|B_cell	B_cell	GSE249513	CACACTCGTGTCAATC-1_1_1_1	control
GSM7949203	GSM7949203|B_cell	B_cell	GSE249513	CACAGGCAGAATTCCC-1_1_1_1	control
GSM7949203	GSM7949203|B_cell	B_cell	GSE249513	CACAGGCAGCTCAACT-1_1_1_1	control
GSM7949203	GSM7949203|B_cell	B_cell	GSE249513	CACAGGCAGGAGTTTA-1_1_1_1	control
GSM7949203	GSM7949203|B_cell	B_cell	GSE249513	CACAGGCCAACACCCG-1_1_1_1	control
GSM7949203	GSM7949203|B_cell	B_cell	GSE249513	CACAGGCGTATGAATG-1_1_1_1	control
GSM7949203	GSM7949203|B_cell	B_cell	GSE249513	CACAGGCGTGACTCAT-1_1_1_1	control
GSM7949203	GSM7949203|B_cell	B_cell	GSE249513	CACAGGCTCAAACAAG-1_1_1_1	control
GSM7949203	GSM7949203|B_cell	B_cell	GSE249513	CACAGGCTCACTTCAT-1_1_1_1	control
GSM7949203	GSM7949203|B_cell	B_cell	GSE249513	CACAGGCTCCGCAAGC-1_1_1_1	control
GSM7949203	GSM7949203|B_cell	B_cell	GSE249513	CACAGTACAAAGTCAA-1_1_1_1	control
GSM7949203	GSM7949203|B_cell	B_cell	GSE249513	CACAGTACATGGATGG-1_1_1_1	control
GSM7949203	GSM7949203|B_cell	B_cell	GSE249513	CACAGTAGTGATGTCT-1_1_1_1	control
GSM7949203	GSM7949203|B_cell	B_cell	GSE249513	CACAGTAGTGCATCTA-1_1_1_1	control
GSM7949203	GSM7949203|B_cell	B_cell	GSE249513	CACAGTAGTGGCCCTA-1_1_1_1	control
GSM7949203	GSM7949203|B_cell	B_cell	GSE249513	CACAGTATCATGTAGC-1_1_1_1	control
GSM7949203	GSM7949203|B_cell	B_cell	GSE249513	CACAGTATCATTCACT-1_1_1_1	control
GSM7949203	GSM7949203|B_cell	B_cell	GSE249513	CACAGTATCGACCAGC-1_1_1_1	control
GSM7949203	GSM7949203|B_cell	B_cell	GSE249513	CACATAGAGAGTAATC-1_1_1_1	control
GSM7949203	GSM7949203|B_cell	B_cell	GSE249513	CACATAGAGCATCATC-1_1_1_1	control
GSM7949203	GSM7949203|B_cell	B_cell	GSE249513	CACATAGAGGTGATTA-1_1_1_1	control
GSM7949203	GSM7949203|B_cell	B_cell	GSE249513	CACATAGAGTCTCCTC-1_1_1_1	control
GSM7949203	GSM7949203|B_cell	B_cell	GSE249513	CACATAGCAAGCTGTT-1_1_1_1	control
GSM7949203	GSM7949203|B_cell	B_cell	GSE249513	CACATAGCAAGTTCTG-1_1_1_1	control
GSM7949203	GSM7949203|B_cell	B_cell	GSE249513	CACATAGCAGTGGGAT-1_1_1_1	control
GSM7949203	GSM7949203|B_cell	B_cell	GSE249513	CACATAGCATAGGATA-1_1_1_1	control
GSM7949203	GSM7949203|B_cell	B_cell	GSE249513	CACATAGGTCAGAGGT-1_1_1_1	control
GSM7949203	GSM7949203|B_cell	B_cell	GSE249513	CACATAGGTCGCCATG-1_1_1_1	control
GSM7949203	GSM7949203|B_cell	B_cell	GSE249513	CACATAGGTCGTGGCT-1_1_1_1	control
GSM7949203	GSM7949203|B_cell	B_cell	GSE249513	CACATAGTCAACCAAC-1_1_1_1	control
GSM7949203	GSM7949203|B_cell	B_cell	GSE249513	CACATAGTCGCGATCG-1_1_1_1	control
GSM7949203	GSM7949203|B_cell	B_cell	GSE249513	CACATAGTCGTACCGG-1_1_1_1	control
GSM7949203	GSM7949203|B_cell	B_cell	GSE249513	CACATAGTCGTTTATC-1_1_1_1	control
GSM7949203	GSM7949203|B_cell	B_cell	GSE249513	CACATAGTCTAGAGTC-1_1_1_1	control
GSM7949203	GSM7949203|B_cell	B_cell	GSE249513	CACATTTAGAGCTTCT-1_1_1_1	control
GSM7949203	GSM7949203|B_cell	B_cell	GSE249513	CACATTTCAATAAGCA-1_1_1_1	control
GSM7949203	GSM7949203|B_cell	B_cell	GSE249513	CACATTTCAATGGTCT-1_1_1_1	control
GSM7949203	GSM7949203|B_cell	B_cell	GSE249513	CACATTTCATAGGATA-1_1_1_1	control
GSM7949203	GSM7949203|B_cell	B_cell	GSE249513	CACATTTCATTGAGCT-1_1_1_1	control
GSM7949203	GSM7949203|B_cell	B_cell	GSE249513	CACATTTGTAACGACG-1_1_1_1	control
GSM7949203	GSM7949203|B_cell	B_cell	GSE249513	CACATTTGTTTGCATG-1_1_1_1	control
GSM7949203	GSM7949203|B_cell	B_cell	GSE249513	CACATTTTCGGACAAG-1_1_1_1	control
GSM7949203	GSM7949203|B_cell	B_cell	GSE249513	CACATTTTCGTGGTCG-1_1_1_1	control
GSM7949203	GSM7949203|B_cell	B_cell	GSE249513	CACCACTAGGGCACTA-1_1_1_1	control
GSM7949203	GSM7949203|B_cell	B_cell	GSE249513	CACCACTCAGCCTTTC-1_1_1_1	control
GSM7949203	GSM7949203|B_cell	B_cell	GSE249513	CACCACTCAGGACCCT-1_1_1_1	control
GSM7949203	GSM7949203|B_cell	B_cell	GSE249513	CACCACTCATCGTCGG-1_1_1_1	control
GSM7949203	GSM7949203|B_cell	B_cell	GSE249513	CACCACTGTCATACTG-1_1_1_1	control
GSM7949203	GSM7949203|B_cell	B_cell	GSE249513	CACCACTTCAATCTCT-1_1_1_1	control
GSM7949203	GSM7949203|B_cell	B_cell	GSE249513	CACCACTTCACAATGC-1_1_1_1	control
GSM7949203	GSM7949203|B_cell	B_cell	GSE249513	CACCACTTCGGCCGAT-1_1_1_1	control
GSM7949203	GSM7949203|B_cell	B_cell	GSE249513	CACCAGGAGGCTAGGT-1_1_1_1	control
GSM7949203	GSM7949203|B_cell	B_cell	GSE249513	CACCAGGAGGGTATCG-1_1_1_1	control
GSM7949203	GSM7949203|B_cell	B_cell	GSE249513	CACCAGGCAAATCCGT-1_1_1_1	control
GSM7949203	GSM7949203|B_cell	B_cell	GSE249513	CACCAGGCAAGCCGTC-1_1_1_1	control
GSM7949203	GSM7949203|B_cell	B_cell	GSE249513	CACCAGGCAATCACAC-1_1_1_1	control
GSM7949203	GSM7949203|B_cell	B_cell	GSE249513	CACCAGGCACCGGAAA-1_1_1_1	control
GSM7949203	GSM7949203|B_cell	B_cell	GSE249513	CACCAGGCACTGCCAG-1_1_1_1	control
GSM7949203	GSM7949203|B_cell	B_cell	GSE249513	CACCAGGCATAGACTC-1_1_1_1	control
GSM7949203	GSM7949203|B_cell	B_cell	GSE249513	CACCAGGCATCTACGA-1_1_1_1	control
GSM7949203	GSM7949203|B_cell	B_cell	GSE249513	CACCAGGGTACTCGCG-1_1_1_1	control
GSM7949203	GSM7949203|B_cell	B_cell	GSE249513	CACCAGGGTCCAGTAT-1_1_1_1	control
GSM7949203	GSM7949203|B_cell	B_cell	GSE249513	CACCAGGTCACGCATA-1_1_1_1	control
GSM7949203	GSM7949203|B_cell	B_cell	GSE249513	CACCAGGTCAGTTCGA-1_1_1_1	control
GSM7949203	GSM7949203|B_cell	B_cell	GSE249513	CACCAGGTCGCCTGTT-1_1_1_1	control
GSM7949203	GSM7949203|B_cell	B_cell	GSE249513	CACCAGGTCTTCTGGC-1_1_1_1	control
GSM7949203	GSM7949203|B_cell	B_cell	GSE249513	CACCTTGAGCTGCAAG-1_1_1_1	control
GSM7949203	GSM7949203|B_cell	B_cell	GSE249513	CACCTTGAGTAGGCCA-1_1_1_1	control
GSM7949203	GSM7949203|B_cell	B_cell	GSE249513	CACCTTGCAGACGCAA-1_1_1_1	control
GSM7949203	GSM7949203|B_cell	B_cell	GSE249513	CACCTTGGTACAGACG-1_1_1_1	control
GSM7949203	GSM7949203|B_cell	B_cell	GSE249513	CACCTTGGTAGCGCAA-1_1_1_1	control
GSM7949203	GSM7949203|B_cell	B_cell	GSE249513	CACCTTGGTGGTCTCG-1_1_1_1	control
GSM7949203	GSM7949203|B_cell	B_cell	GSE249513	CACCTTGTCGACGGAA-1_1_1_1	control
GSM7949203	GSM7949203|B_cell	B_cell	GSE249513	CACTCCAAGTTAACGA-1_1_1_1	control
GSM7949203	GSM7949203|B_cell	B_cell	GSE249513	CACTCCACAAGTTCTG-1_1_1_1	control
GSM7949203	GSM7949203|B_cell	B_cell	GSE249513	CACTCCACACAGAGGT-1_1_1_1	control
GSM7949203	GSM7949203|B_cell	B_cell	GSE249513	CACTCCAGTCGAACAG-1_1_1_1	control
GSM7949203	GSM7949203|B_cell	B_cell	GSE249513	CACTCCAGTGTATGGG-1_1_1_1	control
GSM7949203	GSM7949203|B_cell	B_cell	GSE249513	CACTCCAGTTTGACAC-1_1_1_1	control
GSM7949203	GSM7949203|B_cell	B_cell	GSE249513	CACTCCATCGCGTTTC-1_1_1_1	control
GSM7949203	GSM7949203|B_cell	B_cell	GSE249513	CACTCCATCTCCAGGG-1_1_1_1	control
GSM7949203	GSM7949203|B_cell	B_cell	GSE249513	CACTCCATCTTGTCAT-1_1_1_1	control
GSM7949203	GSM7949203|B_cell	B_cell	GSE249513	CAGAATCAGAAACCTA-1_1_1_1	control
GSM7949203	GSM7949203|B_cell	B_cell	GSE249513	CAGAATCCACGGTGTC-1_1_1_1	control
GSM7949203	GSM7949203|B_cell	B_cell	GSE249513	CAGAATCCAGATAATG-1_1_1_1	control
GSM7949203	GSM7949203|B_cell	B_cell	GSE249513	CAGAATCCATCCTAGA-1_1_1_1	control
GSM7949203	GSM7949203|B_cell	B_cell	GSE249513	CAGAATCGTGCAGACA-1_1_1_1	control
GSM7949203	GSM7949203|B_cell	B_cell	GSE249513	CAGAATCGTTACTGAC-1_1_1_1	control
GSM7949203	GSM7949203|B_cell	B_cell	GSE249513	CAGAATCGTTAGGGTG-1_1_1_1	control
GSM7949203	GSM7949203|B_cell	B_cell	GSE249513	CAGAATCTCTTTAGGG-1_1_1_1	control
GSM7949203	GSM7949203|B_cell	B_cell	GSE249513	CAGAGAGAGCCGATTT-1_1_1_1	control
GSM7949203	GSM7949203|B_cell	B_cell	GSE249513	CAGAGAGCAAGTTAAG-1_1_1_1	control
GSM7949203	GSM7949203|B_cell	B_cell	GSE249513	CAGAGAGCATCGGTTA-1_1_1_1	control
GSM7949203	GSM7949203|B_cell	B_cell	GSE249513	CAGAGAGCATGCAACT-1_1_1_1	control
GSM7949203	GSM7949203|B_cell	B_cell	GSE249513	CAGAGAGCATTCCTGC-1_1_1_1	control
GSM7949203	GSM7949203|B_cell	B_cell	GSE249513	CAGAGAGGTATAGTAG-1_1_1_1	control
GSM7949203	GSM7949203|B_cell	B_cell	GSE249513	CAGAGAGGTCAACATC-1_1_1_1	control
GSM7949203	GSM7949203|B_cell	B_cell	GSE249513	CAGAGAGGTGACTCAT-1_1_1_1	control
GSM7949203	GSM7949203|B_cell	B_cell	GSE249513	CAGAGAGTCATCGGAT-1_1_1_1	control
GSM7949203	GSM7949203|B_cell	B_cell	GSE249513	CAGAGAGTCATCTGTT-1_1_1_1	control
GSM7949203	GSM7949203|B_cell	B_cell	GSE249513	CAGAGAGTCGTTTATC-1_1_1_1	control
GSM7949203	GSM7949203|B_cell	B_cell	GSE249513	CAGAGAGTCTCTGTCG-1_1_1_1	control
GSM7949203	GSM7949203|B_cell	B_cell	GSE249513	CAGATCAAGACACGAC-1_1_1_1	control
GSM7949203	GSM7949203|B_cell	B_cell	GSE249513	CAGATCAAGCACACAG-1_1_1_1	control
GSM7949203	GSM7949203|B_cell	B_cell	GSE249513	CAGATCAAGGCTCTTA-1_1_1_1	control
GSM7949203	GSM7949203|B_cell	B_cell	GSE249513	CAGATCACACATCTTT-1_1_1_1	control
GSM7949203	GSM7949203|B_cell	B_cell	GSE249513	CAGATCAGTTTCGCTC-1_1_1_1	control
GSM7949203	GSM7949203|B_cell	B_cell	GSE249513	CAGCAGCAGCCACTAT-1_1_1_1	control
GSM7949203	GSM7949203|B_cell	B_cell	GSE249513	CAGCAGCCACCAGGTC-1_1_1_1	control
GSM7949203	GSM7949203|B_cell	B_cell	GSE249513	CAGCAGCCATGCATGT-1_1_1_1	control
GSM7949203	GSM7949203|B_cell	B_cell	GSE249513	CAGCAGCGTAGGACAC-1_1_1_1	control
GSM7949203	GSM7949203|B_cell	B_cell	GSE249513	CAGCAGCGTCGGATCC-1_1_1_1	control
GSM7949203	GSM7949203|B_cell	B_cell	GSE249513	CAGCAGCGTCTAGCGC-1_1_1_1	control
GSM7949203	GSM7949203|B_cell	B_cell	GSE249513	CAGCAGCTCCCTAACC-1_1_1_1	control
GSM7949203	GSM7949203|B_cell	B_cell	GSE249513	CAGCAGCTCCCTCAGT-1_1_1_1	control
GSM7949203	GSM7949203|B_cell	B_cell	GSE249513	CAGCAGCTCTATCCCG-1_1_1_1	control
GSM7949203	GSM7949203|B_cell	B_cell	GSE249513	CAGCAGCTCTCTAGGA-1_1_1_1	control
GSM7949203	GSM7949203|B_cell	B_cell	GSE249513	CAGCATAAGCTACCGC-1_1_1_1	control
GSM7949203	GSM7949203|B_cell	B_cell	GSE249513	CAGCATAAGGCCCTTG-1_1_1_1	control
GSM7949203	GSM7949203|B_cell	B_cell	GSE249513	CAGCATACACTACAGT-1_1_1_1	control
GSM7949203	GSM7949203|B_cell	B_cell	GSE249513	CAGCATAGTGCTGTAT-1_1_1_1	control
GSM7949203	GSM7949203|B_cell	B_cell	GSE249513	CAGCATATCCCGGATG-1_1_1_1	control
GSM7949203	GSM7949203|B_cell	B_cell	GSE249513	CAGCCGAAGGACATTA-1_1_1_1	control
GSM7949203	GSM7949203|B_cell	B_cell	GSE249513	CAGCCGATCAGTCAGT-1_1_1_1	control
GSM7949203	GSM7949203|B_cell	B_cell	GSE249513	CAGCCGATCGACCAGC-1_1_1_1	control
GSM7949203	GSM7949203|B_cell	B_cell	GSE249513	CAGCCGATCGCCATAA-1_1_1_1	control
GSM7949203	GSM7949203|B_cell	B_cell	GSE249513	CAGCCGATCTCAAGTG-1_1_1_1	control
GSM7949203	GSM7949203|B_cell	B_cell	GSE249513	CAGCCGATCTCTTGAT-1_1_1_1	control
GSM7949203	GSM7949203|B_cell	B_cell	GSE249513	CAGCGACCAAGGGTCA-1_1_1_1	control
GSM7949203	GSM7949203|B_cell	B_cell	GSE249513	CAGCGACCACGAGAGT-1_1_1_1	control
GSM7949203	GSM7949203|B_cell	B_cell	GSE249513	CAGCGACCAGTAGAGC-1_1_1_1	control
GSM7949203	GSM7949203|B_cell	B_cell	GSE249513	CAGCGACTCAACACGT-1_1_1_1	control
GSM7949203	GSM7949203|B_cell	B_cell	GSE249513	CAGCGACTCACCGGGT-1_1_1_1	control
GSM7949203	GSM7949203|B_cell	B_cell	GSE249513	CAGCGACTCCTGTACC-1_1_1_1	control
GSM7949203	GSM7949203|B_cell	B_cell	GSE249513	CAGCGACTCGGCCGAT-1_1_1_1	control
GSM7949203	GSM7949203|B_cell	B_cell	GSE249513	CAGCGACTCGTTGCCT-1_1_1_1	control
GSM7949203	GSM7949203|B_cell	B_cell	GSE249513	CAGCGACTCTTGTATC-1_1_1_1	control
GSM7949203	GSM7949203|B_cell	B_cell	GSE249513	CAGCTAAAGGGCTTCC-1_1_1_1	control
GSM7949203	GSM7949203|B_cell	B_cell	GSE249513	CAGCTAACAAGCGTAG-1_1_1_1	control
GSM7949203	GSM7949203|B_cell	B_cell	GSE249513	CAGCTAACACCCATGG-1_1_1_1	control
GSM7949203	GSM7949203|B_cell	B_cell	GSE249513	CAGCTAACAGTGGGAT-1_1_1_1	control
GSM7949203	GSM7949203|B_cell	B_cell	GSE249513	CAGCTAACATCCGTGG-1_1_1_1	control
GSM7949203	GSM7949203|B_cell	B_cell	GSE249513	CAGCTAAGTAGCTCCG-1_1_1_1	control
GSM7949203	GSM7949203|B_cell	B_cell	GSE249513	CAGCTAAGTCACTGGC-1_1_1_1	control
GSM7949203	GSM7949203|B_cell	B_cell	GSE249513	CAGCTAAGTGAGGCTA-1_1_1_1	control
GSM7949203	GSM7949203|B_cell	B_cell	GSE249513	CAGCTAAGTGTGAAAT-1_1_1_1	control
GSM7949203	GSM7949203|B_cell	B_cell	GSE249513	CAGCTAATCACCTTAT-1_1_1_1	control
GSM7949203	GSM7949203|B_cell	B_cell	GSE249513	CAGCTAATCGTTGACA-1_1_1_1	control
GSM7949203	GSM7949203|B_cell	B_cell	GSE249513	CAGCTGGAGCAGCCTC-1_1_1_1	control
GSM7949203	GSM7949203|B_cell	B_cell	GSE249513	CAGCTGGAGCTGCAAG-1_1_1_1	control
GSM7949203	GSM7949203|B_cell	B_cell	GSE249513	CAGCTGGAGTCTCAAC-1_1_1_1	control
GSM7949203	GSM7949203|B_cell	B_cell	GSE249513	CAGCTGGGTAGCGTCC-1_1_1_1	control
GSM7949203	GSM7949203|B_cell	B_cell	GSE249513	CAGCTGGGTCCAACTA-1_1_1_1	control
GSM7949203	GSM7949203|B_cell	B_cell	GSE249513	CAGCTGGGTCTTGCGG-1_1_1_1	control
GSM7949203	GSM7949203|B_cell	B_cell	GSE249513	CAGCTGGTCGGGAGTA-1_1_1_1	control
GSM7949203	GSM7949203|B_cell	B_cell	GSE249513	CAGCTGGTCTAACCGA-1_1_1_1	control
GSM7949203	GSM7949203|B_cell	B_cell	GSE249513	CAGCTGGTCTATCGCC-1_1_1_1	control
GSM7949203	GSM7949203|B_cell	B_cell	GSE249513	CAGGTGCAGTCAAGCG-1_1_1_1	control
GSM7949203	GSM7949203|B_cell	B_cell	GSE249513	CAGGTGCCAAACCCAT-1_1_1_1	control
GSM7949203	GSM7949203|B_cell	B_cell	GSE249513	CAGGTGCCAGAGTGTG-1_1_1_1	control
GSM7949203	GSM7949203|B_cell	B_cell	GSE249513	CAGGTGCCAGTTCATG-1_1_1_1	control
GSM7949203	GSM7949203|B_cell	B_cell	GSE249513	CAGGTGCGTGTTTGTG-1_1_1_1	control
GSM7949203	GSM7949203|B_cell	B_cell	GSE249513	CAGGTGCGTTACGTCA-1_1_1_1	control
GSM7949203	GSM7949203|B_cell	B_cell	GSE249513	CAGGTGCTCAATAAGG-1_1_1_1	control
GSM7949203	GSM7949203|B_cell	B_cell	GSE249513	CAGGTGCTCATGGTCA-1_1_1_1	control
GSM7949203	GSM7949203|B_cell	B_cell	GSE249513	CAGGTGCTCTTGAGAC-1_1_1_1	control
GSM7949203	GSM7949203|B_cell	B_cell	GSE249513	CAGGTGCTCTTTCCTC-1_1_1_1	control
GSM7949203	GSM7949203|B_cell	B_cell	GSE249513	CAGTAACAGCGAGAAA-1_1_1_1	control
GSM7949203	GSM7949203|B_cell	B_cell	GSE249513	CAGTAACAGTAGGCCA-1_1_1_1	control
GSM7949203	GSM7949203|B_cell	B_cell	GSE249513	CAGTAACGTGAGTATA-1_1_1_1	control
GSM7949203	GSM7949203|B_cell	B_cell	GSE249513	CAGTAACGTTAAGACA-1_1_1_1	control
GSM7949203	GSM7949203|B_cell	B_cell	GSE249513	CAGTAACTCAATCTCT-1_1_1_1	control
GSM7949203	GSM7949203|B_cell	B_cell	GSE249513	CAGTAACTCAGAGCTT-1_1_1_1	control
GSM7949203	GSM7949203|B_cell	B_cell	GSE249513	CAGTAACTCCAAACTG-1_1_1_1	control
GSM7949203	GSM7949203|B_cell	B_cell	GSE249513	CAGTAACTCCAATGGT-1_1_1_1	control
GSM7949203	GSM7949203|B_cell	B_cell	GSE249513	CAGTAACTCCCACTTG-1_1_1_1	control
GSM7949203	GSM7949203|B_cell	B_cell	GSE249513	CAGTAACTCTAAGCCA-1_1_1_1	control
GSM7949203	GSM7949203|B_cell	B_cell	GSE249513	CAGTAACTCTTACCTA-1_1_1_1	control
GSM7949203	GSM7949203|B_cell	B_cell	GSE249513	CAGTCCTAGTCACGCC-1_1_1_1	control
GSM7949203	GSM7949203|B_cell	B_cell	GSE249513	CAGTCCTCAAAGGTGC-1_1_1_1	control
GSM7949203	GSM7949203|B_cell	B_cell	GSE249513	CAGTCCTCACACGCTG-1_1_1_1	control
GSM7949203	GSM7949203|B_cell	B_cell	GSE249513	CAGTCCTCACCTTGTC-1_1_1_1	control
GSM7949203	GSM7949203|B_cell	B_cell	GSE249513	CAGTCCTCAGCGATCC-1_1_1_1	control
GSM7949203	GSM7949203|B_cell	B_cell	GSE249513	CAGTCCTCATACAGCT-1_1_1_1	control
GSM7949203	GSM7949203|B_cell	B_cell	GSE249513	CAGTCCTCATGAGCGA-1_1_1_1	control
GSM7949203	GSM7949203|B_cell	B_cell	GSE249513	CAGTCCTGTTCACCTC-1_1_1_1	control
GSM7949203	GSM7949203|B_cell	B_cell	GSE249513	CAGTCCTTCACCCGAG-1_1_1_1	control
GSM7949203	GSM7949203|B_cell	B_cell	GSE249513	CAGTCCTTCACGCATA-1_1_1_1	control
GSM7949203	GSM7949203|B_cell	B_cell	GSE249513	CATATGGAGGAGTACC-1_1_1_1	control
GSM7949203	GSM7949203|B_cell	B_cell	GSE249513	CATATGGCACAGAGGT-1_1_1_1	control
GSM7949203	GSM7949203|B_cell	B_cell	GSE249513	CATATGGCAGTACACT-1_1_1_1	control
GSM7949203	GSM7949203|B_cell	B_cell	GSE249513	CATATGGCATTGCGGC-1_1_1_1	control
GSM7949203	GSM7949203|B_cell	B_cell	GSE249513	CATATGGGTAGAAGGA-1_1_1_1	control
GSM7949203	GSM7949203|B_cell	B_cell	GSE249513	CATATGGGTTTGACAC-1_1_1_1	control
GSM7949203	GSM7949203|B_cell	B_cell	GSE249513	CATATGGTCAGTTGAC-1_1_1_1	control
GSM7949203	GSM7949203|B_cell	B_cell	GSE249513	CATATGGTCATCGATG-1_1_1_1	control
GSM7949203	GSM7949203|B_cell	B_cell	GSE249513	CATATGGTCCAGAGGA-1_1_1_1	control
GSM7949203	GSM7949203|B_cell	B_cell	GSE249513	CATATGGTCGTAGATC-1_1_1_1	control
GSM7949203	GSM7949203|B_cell	B_cell	GSE249513	CATATGGTCTATGTGG-1_1_1_1	control
GSM7949203	GSM7949203|B_cell	B_cell	GSE249513	CATATTCCAGCGTTCG-1_1_1_1	control
GSM7949203	GSM7949203|B_cell	B_cell	GSE249513	CATATTCCAGGACCCT-1_1_1_1	control
GSM7949203	GSM7949203|B_cell	B_cell	GSE249513	CATATTCGTTGCGTTA-1_1_1_1	control
GSM7949203	GSM7949203|B_cell	B_cell	GSE249513	CATATTCTCACAAACC-1_1_1_1	control
GSM7949203	GSM7949203|B_cell	B_cell	GSE249513	CATATTCTCAGCACAT-1_1_1_1	control
GSM7949203	GSM7949203|B_cell	B_cell	GSE249513	CATATTCTCTGCAAGT-1_1_1_1	control
GSM7949203	GSM7949203|B_cell	B_cell	GSE249513	CATCAAGCAAGTCTGT-1_1_1_1	control
GSM7949203	GSM7949203|B_cell	B_cell	GSE249513	CATCAAGCACCATCCT-1_1_1_1	control
GSM7949203	GSM7949203|B_cell	B_cell	GSE249513	CATCAAGGTAGCTAAA-1_1_1_1	control
GSM7949203	GSM7949203|B_cell	B_cell	GSE249513	CATCAAGGTCTAGCCG-1_1_1_1	control
GSM7949203	GSM7949203|B_cell	B_cell	GSE249513	CATCAAGGTTCAGACT-1_1_1_1	control
GSM7949203	GSM7949203|B_cell	B_cell	GSE249513	CATCAAGTCATCGCTC-1_1_1_1	control
GSM7949203	GSM7949203|B_cell	B_cell	GSE249513	CATCAAGTCGCGCCAA-1_1_1_1	control
GSM7949203	GSM7949203|B_cell	B_cell	GSE249513	CATCAGAAGAGTACAT-1_1_1_1	control
GSM7949203	GSM7949203|B_cell	B_cell	GSE249513	CATCAGAAGCAGCGTA-1_1_1_1	control
GSM7949203	GSM7949203|B_cell	B_cell	GSE249513	CATCAGAAGGAGTCTG-1_1_1_1	control
GSM7949203	GSM7949203|B_cell	B_cell	GSE249513	CATCAGAGTAGCTAAA-1_1_1_1	control
GSM7949203	GSM7949203|B_cell	B_cell	GSE249513	CATCAGAGTTGCGTTA-1_1_1_1	control
GSM7949203	GSM7949203|B_cell	B_cell	GSE249513	CATCAGATCGGCCGAT-1_1_1_1	control
GSM7949203	GSM7949203|B_cell	B_cell	GSE249513	CATCAGATCTCCAACC-1_1_1_1	control
GSM7949203	GSM7949203|B_cell	B_cell	GSE249513	CATCAGATCTGTACGA-1_1_1_1	control
GSM7949203	GSM7949203|B_cell	B_cell	GSE249513	CATCCACAGAGTAAGG-1_1_1_1	control
GSM7949203	GSM7949203|B_cell	B_cell	GSE249513	CATCCACAGGATTCGG-1_1_1_1	control
GSM7949203	GSM7949203|B_cell	B_cell	GSE249513	CATCCACAGGCAGTCA-1_1_1_1	control
GSM7949203	GSM7949203|B_cell	B_cell	GSE249513	CATCCACCAAACCTAC-1_1_1_1	control
GSM7949203	GSM7949203|B_cell	B_cell	GSE249513	CATCCACGTCTCTTTA-1_1_1_1	control
GSM7949203	GSM7949203|B_cell	B_cell	GSE249513	CATCCACGTGCAGACA-1_1_1_1	control
GSM7949203	GSM7949203|B_cell	B_cell	GSE249513	CATCCACTCCGATATG-1_1_1_1	control
GSM7949203	GSM7949203|B_cell	B_cell	GSE249513	CATCGAAAGAGGTTAT-1_1_1_1	control
GSM7949203	GSM7949203|B_cell	B_cell	GSE249513	CATCGAAAGGGATCTG-1_1_1_1	control
GSM7949203	GSM7949203|B_cell	B_cell	GSE249513	CATCGAACATGCAACT-1_1_1_1	control
GSM7949203	GSM7949203|B_cell	B_cell	GSE249513	CATCGAAGTAAATGTG-1_1_1_1	control
GSM7949203	GSM7949203|B_cell	B_cell	GSE249513	CATCGAAGTCAATACC-1_1_1_1	control
GSM7949203	GSM7949203|B_cell	B_cell	GSE249513	CATCGAAGTCCGTGAC-1_1_1_1	control
GSM7949203	GSM7949203|B_cell	B_cell	GSE249513	CATCGAAGTTAAGAAC-1_1_1_1	control
GSM7949203	GSM7949203|B_cell	B_cell	GSE249513	CATCGAATCTCAAACG-1_1_1_1	control
GSM7949203	GSM7949203|B_cell	B_cell	GSE249513	CATCGGGAGTACACCT-1_1_1_1	control
GSM7949203	GSM7949203|B_cell	B_cell	GSE249513	CATCGGGAGTGTACCT-1_1_1_1	control
GSM7949203	GSM7949203|B_cell	B_cell	GSE249513	CATCGGGCACCACCAG-1_1_1_1	control
GSM7949203	GSM7949203|B_cell	B_cell	GSE249513	CATCGGGCAGTATAAG-1_1_1_1	control
GSM7949203	GSM7949203|B_cell	B_cell	GSE249513	CATCGGGCATGGTTGT-1_1_1_1	control
GSM7949203	GSM7949203|B_cell	B_cell	GSE249513	CATCGGGCATGTTGAC-1_1_1_1	control
GSM7949203	GSM7949203|B_cell	B_cell	GSE249513	CATCGGGGTCTGCCAG-1_1_1_1	control
GSM7949203	GSM7949203|B_cell	B_cell	GSE249513	CATCGGGTCACCACCT-1_1_1_1	control
GSM7949203	GSM7949203|B_cell	B_cell	GSE249513	CATCGGGTCGTTACAG-1_1_1_1	control
GSM7949203	GSM7949203|B_cell	B_cell	GSE249513	CATCGGGTCTGGTATG-1_1_1_1	control
GSM7949203	GSM7949203|B_cell	B_cell	GSE249513	CATCGGGTCTTGTCAT-1_1_1_1	control
GSM7949203	GSM7949203|B_cell	B_cell	GSE249513	CATGACAAGCCCAGCT-1_1_1_1	control
GSM7949203	GSM7949203|B_cell	B_cell	GSE249513	CATGACAAGGTGACCA-1_1_1_1	control
GSM7949203	GSM7949203|B_cell	B_cell	GSE249513	CATGACAAGGTGGGTT-1_1_1_1	control
GSM7949203	GSM7949203|B_cell	B_cell	GSE249513	CATGACAAGTACGCCC-1_1_1_1	control
GSM7949203	GSM7949203|B_cell	B_cell	GSE249513	CATGACACAATGTTGC-1_1_1_1	control
GSM7949203	GSM7949203|B_cell	B_cell	GSE249513	CATGACACATCAGTCA-1_1_1_1	control
GSM7949203	GSM7949203|B_cell	B_cell	GSE249513	CATGACACATCCGTGG-1_1_1_1	control
GSM7949203	GSM7949203|B_cell	B_cell	GSE249513	CATGACAGTCATACTG-1_1_1_1	control
GSM7949203	GSM7949203|B_cell	B_cell	GSE249513	CATGACAGTCATCCCT-1_1_1_1	control
GSM7949203	GSM7949203|B_cell	B_cell	GSE249513	CATGACAGTCTCACCT-1_1_1_1	control
GSM7949203	GSM7949203|B_cell	B_cell	GSE249513	CATGACAGTCTGCAAT-1_1_1_1	control
GSM7949203	GSM7949203|B_cell	B_cell	GSE249513	CATGACAGTTGTGGAG-1_1_1_1	control
GSM7949203	GSM7949203|B_cell	B_cell	GSE249513	CATGCCTAGTGTCCCG-1_1_1_1	control
GSM7949203	GSM7949203|B_cell	B_cell	GSE249513	CATGCCTCAAACGCGA-1_1_1_1	control
GSM7949203	GSM7949203|B_cell	B_cell	GSE249513	CATGCCTCAAGAAGAG-1_1_1_1	control
GSM7949203	GSM7949203|B_cell	B_cell	GSE249513	CATGCCTCAATCGGTT-1_1_1_1	control
GSM7949203	GSM7949203|B_cell	B_cell	GSE249513	CATGCCTCACGGATAG-1_1_1_1	control
GSM7949203	GSM7949203|B_cell	B_cell	GSE249513	CATGCCTCACTACAGT-1_1_1_1	control
GSM7949203	GSM7949203|B_cell	B_cell	GSE249513	CATGCCTGTCCGAATT-1_1_1_1	control
GSM7949203	GSM7949203|B_cell	B_cell	GSE249513	CATGCCTGTGAGGGAG-1_1_1_1	control
GSM7949203	GSM7949203|B_cell	B_cell	GSE249513	CATGCCTTCCTATTCA-1_1_1_1	control
GSM7949203	GSM7949203|B_cell	B_cell	GSE249513	CATGCCTTCTGGTGTA-1_1_1_1	control
GSM7949203	GSM7949203|B_cell	B_cell	GSE249513	CATGCCTTCTTGTATC-1_1_1_1	control
GSM7949203	GSM7949203|B_cell	B_cell	GSE249513	CATGGCGCACAGTCGC-1_1_1_1	control
GSM7949203	GSM7949203|B_cell	B_cell	GSE249513	CATGGCGGTTAAAGTG-1_1_1_1	control
GSM7949203	GSM7949203|B_cell	B_cell	GSE249513	CATGGCGGTTCGTGAT-1_1_1_1	control
GSM7949203	GSM7949203|B_cell	B_cell	GSE249513	CATGGCGTCACGAAGG-1_1_1_1	control
GSM7949203	GSM7949203|B_cell	B_cell	GSE249513	CATGGCGTCCCGGATG-1_1_1_1	control
GSM7949203	GSM7949203|B_cell	B_cell	GSE249513	CATGGCGTCCTCTAGC-1_1_1_1	control
GSM7949203	GSM7949203|B_cell	B_cell	GSE249513	CATTATCAGCAGACTG-1_1_1_1	control
GSM7949203	GSM7949203|B_cell	B_cell	GSE249513	CATTATCAGCGATAGC-1_1_1_1	control
GSM7949203	GSM7949203|B_cell	B_cell	GSE249513	CATTATCCAAACCTAC-1_1_1_1	control
GSM7949203	GSM7949203|B_cell	B_cell	GSE249513	CATTATCCAAGGGTCA-1_1_1_1	control
GSM7949203	GSM7949203|B_cell	B_cell	GSE249513	CATTATCCAAGGTGTG-1_1_1_1	control
GSM7949203	GSM7949203|B_cell	B_cell	GSE249513	CATTATCCACGGTAGA-1_1_1_1	control
GSM7949203	GSM7949203|B_cell	B_cell	GSE249513	CATTATCGTTTGTTGG-1_1_1_1	control
GSM7949203	GSM7949203|B_cell	B_cell	GSE249513	CATTATCTCCCATTTA-1_1_1_1	control
GSM7949203	GSM7949203|B_cell	B_cell	GSE249513	CATTATCTCGAATGCT-1_1_1_1	control
GSM7949203	GSM7949203|B_cell	B_cell	GSE249513	CATTATCTCGCGGATC-1_1_1_1	control
GSM7949203	GSM7949203|B_cell	B_cell	GSE249513	CATTATCTCGGCCGAT-1_1_1_1	control
GSM7949203	GSM7949203|B_cell	B_cell	GSE249513	CATTATCTCTAGAGTC-1_1_1_1	control
GSM7949203	GSM7949203|B_cell	B_cell	GSE249513	CATTATCTCTGATTCT-1_1_1_1	control
GSM7949203	GSM7949203|B_cell	B_cell	GSE249513	CATTCGCAGAAACGAG-1_1_1_1	control
GSM7949203	GSM7949203|B_cell	B_cell	GSE249513	CATTCGCAGACCGGAT-1_1_1_1	control
GSM7949203	GSM7949203|B_cell	B_cell	GSE249513	CATTCGCAGATGCGAC-1_1_1_1	control
GSM7949203	GSM7949203|B_cell	B_cell	GSE249513	CATTCGCAGCCAGAAC-1_1_1_1	control
GSM7949203	GSM7949203|B_cell	B_cell	GSE249513	CATTCGCAGCCCGAAA-1_1_1_1	control
GSM7949203	GSM7949203|B_cell	B_cell	GSE249513	CATTCGCAGTCGAGTG-1_1_1_1	control
GSM7949203	GSM7949203|B_cell	B_cell	GSE249513	CATTCGCAGTGCAAGC-1_1_1_1	control
GSM7949203	GSM7949203|B_cell	B_cell	GSE249513	CATTCGCAGTGTACCT-1_1_1_1	control
GSM7949203	GSM7949203|B_cell	B_cell	GSE249513	CATTCGCCAGTTCCCT-1_1_1_1	control
GSM7949203	GSM7949203|B_cell	B_cell	GSE249513	CATTCGCGTCACCTAA-1_1_1_1	control
GSM7949203	GSM7949203|B_cell	B_cell	GSE249513	CATTCGCGTGCCTGCA-1_1_1_1	control
GSM7949203	GSM7949203|B_cell	B_cell	GSE249513	CATTCGCTCACCTTAT-1_1_1_1	control
GSM7949203	GSM7949203|B_cell	B_cell	GSE249513	CATTCGCTCAGGTTCA-1_1_1_1	control
GSM7949203	GSM7949203|B_cell	B_cell	GSE249513	CATTCGCTCAGTTCGA-1_1_1_1	control
GSM7949203	GSM7949203|B_cell	B_cell	GSE249513	CCAATCCAGAGCCTAG-1_1_1_1	control
GSM7949203	GSM7949203|B_cell	B_cell	GSE249513	CCAATCCAGATATGGT-1_1_1_1	control
GSM7949203	GSM7949203|B_cell	B_cell	GSE249513	CCAATCCAGGATATAC-1_1_1_1	control
GSM7949203	GSM7949203|B_cell	B_cell	GSE249513	CCAATCCAGTCCCACG-1_1_1_1	control
GSM7949203	GSM7949203|B_cell	B_cell	GSE249513	CCAATCCCAAGTCTGT-1_1_1_1	control
GSM7949203	GSM7949203|B_cell	B_cell	GSE249513	CCAATCCGTTAGGGTG-1_1_1_1	control
GSM7949203	GSM7949203|B_cell	B_cell	GSE249513	CCAATCCGTTATCGGT-1_1_1_1	control
GSM7949203	GSM7949203|B_cell	B_cell	GSE249513	CCACCTAAGTACGTTC-1_1_1_1	control
GSM7949203	GSM7949203|B_cell	B_cell	GSE249513	CCACCTACACATCTTT-1_1_1_1	control
GSM7949203	GSM7949203|B_cell	B_cell	GSE249513	CCACCTACAGGTCGTC-1_1_1_1	control
GSM7949203	GSM7949203|B_cell	B_cell	GSE249513	CCACCTAGTCCGTGAC-1_1_1_1	control
GSM7949203	GSM7949203|B_cell	B_cell	GSE249513	CCACCTAGTGTATGGG-1_1_1_1	control
GSM7949203	GSM7949203|B_cell	B_cell	GSE249513	CCACCTAGTGTGACCC-1_1_1_1	control
GSM7949203	GSM7949203|B_cell	B_cell	GSE249513	CCACCTATCAGCTGGC-1_1_1_1	control
GSM7949203	GSM7949203|B_cell	B_cell	GSE249513	CCACCTATCAGTTGAC-1_1_1_1	control
GSM7949203	GSM7949203|B_cell	B_cell	GSE249513	CCACGGAAGAGACGAA-1_1_1_1	control
GSM7949203	GSM7949203|B_cell	B_cell	GSE249513	CCACGGAAGCCACGTC-1_1_1_1	control
GSM7949203	GSM7949203|B_cell	B_cell	GSE249513	CCACGGAAGGTCGGAT-1_1_1_1	control
GSM7949203	GSM7949203|B_cell	B_cell	GSE249513	CCACGGAAGTCTCGGC-1_1_1_1	control
GSM7949203	GSM7949203|B_cell	B_cell	GSE249513	CCACGGACATAAGACA-1_1_1_1	control
GSM7949203	GSM7949203|B_cell	B_cell	GSE249513	CCACGGACATGCAATC-1_1_1_1	control
GSM7949203	GSM7949203|B_cell	B_cell	GSE249513	CCACGGAGTATCGCAT-1_1_1_1	control
GSM7949203	GSM7949203|B_cell	B_cell	GSE249513	CCACGGAGTGAGGGAG-1_1_1_1	control
GSM7949203	GSM7949203|B_cell	B_cell	GSE249513	CCACGGATCCTGTACC-1_1_1_1	control
GSM7949203	GSM7949203|B_cell	B_cell	GSE249513	CCACTACAGGCGCTCT-1_1_1_1	control
GSM7949203	GSM7949203|B_cell	B_cell	GSE249513	CCACTACAGTGGGATC-1_1_1_1	control
GSM7949203	GSM7949203|B_cell	B_cell	GSE249513	CCACTACCAATCCAAC-1_1_1_1	control
GSM7949203	GSM7949203|B_cell	B_cell	GSE249513	CCACTACCAGAGCCAA-1_1_1_1	control
GSM7949203	GSM7949203|B_cell	B_cell	GSE249513	CCACTACCAGTATGCT-1_1_1_1	control
GSM7949203	GSM7949203|B_cell	B_cell	GSE249513	CCACTACCATCCAACA-1_1_1_1	control
GSM7949203	GSM7949203|B_cell	B_cell	GSE249513	CCACTACGTAGGCTGA-1_1_1_1	control
GSM7949203	GSM7949203|B_cell	B_cell	GSE249513	CCACTACGTTCGTCTC-1_1_1_1	control
GSM7949203	GSM7949203|B_cell	B_cell	GSE249513	CCACTACTCCGGCACA-1_1_1_1	control
GSM7949203	GSM7949203|B_cell	B_cell	GSE249513	CCACTACTCGAGAGCA-1_1_1_1	control
GSM7949203	GSM7949203|B_cell	B_cell	GSE249513	CCAGCGAAGCCAGGAT-1_1_1_1	control
GSM7949203	GSM7949203|B_cell	B_cell	GSE249513	CCAGCGAAGCCATCGC-1_1_1_1	control
GSM7949203	GSM7949203|B_cell	B_cell	GSE249513	CCAGCGAAGGGAACGG-1_1_1_1	control
GSM7949203	GSM7949203|B_cell	B_cell	GSE249513	CCAGCGAAGTGGAGAA-1_1_1_1	control
GSM7949203	GSM7949203|B_cell	B_cell	GSE249513	CCAGCGAGTATAGGGC-1_1_1_1	control
GSM7949203	GSM7949203|B_cell	B_cell	GSE249513	CCAGCGATCAGTTGAC-1_1_1_1	control
GSM7949203	GSM7949203|B_cell	B_cell	GSE249513	CCAGCGATCCCATTAT-1_1_1_1	control
GSM7949203	GSM7949203|B_cell	B_cell	GSE249513	CCAGCGATCCGCAGTG-1_1_1_1	control
GSM7949203	GSM7949203|B_cell	B_cell	GSE249513	CCAGCGATCGATGAGG-1_1_1_1	control
GSM7949203	GSM7949203|B_cell	B_cell	GSE249513	CCAGCGATCTCCTATA-1_1_1_1	control
GSM7949203	GSM7949203|B_cell	B_cell	GSE249513	CCAGCGATCTCTTATG-1_1_1_1	control
GSM7949203	GSM7949203|B_cell	B_cell	GSE249513	CCAGCGATCTGAAAGA-1_1_1_1	control
GSM7949203	GSM7949203|B_cell	B_cell	GSE249513	CCATGTCAGAAACCGC-1_1_1_1	control
GSM7949203	GSM7949203|B_cell	B_cell	GSE249513	CCATGTCAGACGCACA-1_1_1_1	control
GSM7949203	GSM7949203|B_cell	B_cell	GSE249513	CCATGTCAGTATCTCG-1_1_1_1	control
GSM7949203	GSM7949203|B_cell	B_cell	GSE249513	CCATGTCCACAGCGTC-1_1_1_1	control
GSM7949203	GSM7949203|B_cell	B_cell	GSE249513	CCATGTCGTACACCGC-1_1_1_1	control
GSM7949203	GSM7949203|B_cell	B_cell	GSE249513	CCATGTCGTCAACATC-1_1_1_1	control
GSM7949203	GSM7949203|B_cell	B_cell	GSE249513	CCATGTCGTGAGGGTT-1_1_1_1	control
GSM7949203	GSM7949203|B_cell	B_cell	GSE249513	CCATGTCGTTTGTTTC-1_1_1_1	control
GSM7949203	GSM7949203|B_cell	B_cell	GSE249513	CCATGTCTCTTGCCGT-1_1_1_1	control
GSM7949203	GSM7949203|B_cell	B_cell	GSE249513	CCATTCGAGCACACAG-1_1_1_1	control
GSM7949203	GSM7949203|B_cell	B_cell	GSE249513	CCATTCGAGCTACCGC-1_1_1_1	control
GSM7949203	GSM7949203|B_cell	B_cell	GSE249513	CCATTCGAGGGCACTA-1_1_1_1	control
GSM7949203	GSM7949203|B_cell	B_cell	GSE249513	CCATTCGAGGGTCTCC-1_1_1_1	control
GSM7949203	GSM7949203|B_cell	B_cell	GSE249513	CCATTCGAGTAGGCCA-1_1_1_1	control
GSM7949203	GSM7949203|B_cell	B_cell	GSE249513	CCATTCGCAATCAGAA-1_1_1_1	control
GSM7949203	GSM7949203|B_cell	B_cell	GSE249513	CCATTCGCACGCTTTC-1_1_1_1	control
GSM7949203	GSM7949203|B_cell	B_cell	GSE249513	CCATTCGCACTACAGT-1_1_1_1	control
GSM7949203	GSM7949203|B_cell	B_cell	GSE249513	CCATTCGCAGTAGAGC-1_1_1_1	control
GSM7949203	GSM7949203|B_cell	B_cell	GSE249513	CCATTCGCATCCCACT-1_1_1_1	control
GSM7949203	GSM7949203|B_cell	B_cell	GSE249513	CCATTCGGTAAATGAC-1_1_1_1	control
GSM7949203	GSM7949203|B_cell	B_cell	GSE249513	CCATTCGGTAGAGGAA-1_1_1_1	control
GSM7949203	GSM7949203|B_cell	B_cell	GSE249513	CCATTCGGTCAGAAGC-1_1_1_1	control
GSM7949203	GSM7949203|B_cell	B_cell	GSE249513	CCATTCGGTCTAAAGA-1_1_1_1	control
GSM7949203	GSM7949203|B_cell	B_cell	GSE249513	CCATTCGGTCTGATTG-1_1_1_1	control
GSM7949203	GSM7949203|B_cell	B_cell	GSE249513	CCATTCGTCGTCGTTC-1_1_1_1	control
GSM7949203	GSM7949203|B_cell	B_cell	GSE249513	CCATTCGTCGTTTAGG-1_1_1_1	control
GSM7949203	GSM7949203|B_cell	B_cell	GSE249513	CCATTCGTCTCTAGGA-1_1_1_1	control
GSM7949203	GSM7949203|B_cell	B_cell	GSE249513	CCATTCGTCTTGCATT-1_1_1_1	control
GSM7949203	GSM7949203|B_cell	B_cell	GSE249513	CCCAATCAGGCCCTTG-1_1_1_1	control
GSM7949203	GSM7949203|B_cell	B_cell	GSE249513	CCCAATCAGGCTATCT-1_1_1_1	control
GSM7949203	GSM7949203|B_cell	B_cell	GSE249513	CCCAATCCATGGTCAT-1_1_1_1	control
GSM7949203	GSM7949203|B_cell	B_cell	GSE249513	CCCAATCGTACCGCTG-1_1_1_1	control
GSM7949203	GSM7949203|B_cell	B_cell	GSE249513	CCCAATCTCCAAACTG-1_1_1_1	control
GSM7949203	GSM7949203|B_cell	B_cell	GSE249513	CCCAATCTCCGAAGAG-1_1_1_1	control
GSM7949203	GSM7949203|B_cell	B_cell	GSE249513	CCCAATCTCTGCGACG-1_1_1_1	control
GSM7949203	GSM7949203|B_cell	B_cell	GSE249513	CCCAGTTAGGGTGTTG-1_1_1_1	control
GSM7949203	GSM7949203|B_cell	B_cell	GSE249513	CCCAGTTCAAACAACA-1_1_1_1	control
GSM7949203	GSM7949203|B_cell	B_cell	GSE249513	CCCAGTTCAATCGGTT-1_1_1_1	control
GSM7949203	GSM7949203|B_cell	B_cell	GSE249513	CCCAGTTCACCACCAG-1_1_1_1	control
GSM7949203	GSM7949203|B_cell	B_cell	GSE249513	CCCAGTTCACCGTTGG-1_1_1_1	control
GSM7949203	GSM7949203|B_cell	B_cell	GSE249513	CCCAGTTCATCACGTA-1_1_1_1	control
GSM7949203	GSM7949203|B_cell	B_cell	GSE249513	CCCAGTTGTCTCCCTA-1_1_1_1	control
GSM7949203	GSM7949203|B_cell	B_cell	GSE249513	CCCAGTTGTGCAGACA-1_1_1_1	control
GSM7949203	GSM7949203|B_cell	B_cell	GSE249513	CCCAGTTTCACTTACT-1_1_1_1	control
GSM7949203	GSM7949203|B_cell	B_cell	GSE249513	CCCAGTTTCCTCCTAG-1_1_1_1	control
GSM7949203	GSM7949203|B_cell	B_cell	GSE249513	CCCAGTTTCTTGGGTA-1_1_1_1	control
GSM7949203	GSM7949203|B_cell	B_cell	GSE249513	CCCATACCACATCCGG-1_1_1_1	control
GSM7949203	GSM7949203|B_cell	B_cell	GSE249513	CCCATACTCCTTGCCA-1_1_1_1	control
GSM7949203	GSM7949203|B_cell	B_cell	GSE249513	CCCTCCTAGATCCCAT-1_1_1_1	control
GSM7949203	GSM7949203|B_cell	B_cell	GSE249513	CCCTCCTAGCCAGAAC-1_1_1_1	control
GSM7949203	GSM7949203|B_cell	B_cell	GSE249513	CCCTCCTAGCGCTTAT-1_1_1_1	control
GSM7949203	GSM7949203|B_cell	B_cell	GSE249513	CCCTCCTAGCTGTCTA-1_1_1_1	control
GSM7949203	GSM7949203|B_cell	B_cell	GSE249513	CCCTCCTAGGACGAAA-1_1_1_1	control
GSM7949203	GSM7949203|B_cell	B_cell	GSE249513	CCCTCCTAGTCGATAA-1_1_1_1	control
GSM7949203	GSM7949203|B_cell	B_cell	GSE249513	CCCTCCTAGTGTTTGC-1_1_1_1	control
GSM7949203	GSM7949203|B_cell	B_cell	GSE249513	CCCTCCTCACAGGTTT-1_1_1_1	control
GSM7949203	GSM7949203|B_cell	B_cell	GSE249513	CCCTCCTCACGTCAGC-1_1_1_1	control
GSM7949203	GSM7949203|B_cell	B_cell	GSE249513	CCCTCCTCAGCCACCA-1_1_1_1	control
GSM7949203	GSM7949203|B_cell	B_cell	GSE249513	CCCTCCTCATCTGGTA-1_1_1_1	control
GSM7949203	GSM7949203|B_cell	B_cell	GSE249513	CCCTCCTGTAAACACA-1_1_1_1	control
GSM7949203	GSM7949203|B_cell	B_cell	GSE249513	CCCTCCTGTAGCGATG-1_1_1_1	control
GSM7949203	GSM7949203|B_cell	B_cell	GSE249513	CCCTCCTGTCATGCAT-1_1_1_1	control
GSM7949203	GSM7949203|B_cell	B_cell	GSE249513	CCCTCCTGTTCCAACA-1_1_1_1	control
GSM7949203	GSM7949203|B_cell	B_cell	GSE249513	CCCTCCTTCAAACAAG-1_1_1_1	control
GSM7949203	GSM7949203|B_cell	B_cell	GSE249513	CCCTCCTTCACCCGAG-1_1_1_1	control
GSM7949203	GSM7949203|B_cell	B_cell	GSE249513	CCCTCCTTCACCTCGT-1_1_1_1	control
GSM7949203	GSM7949203|B_cell	B_cell	GSE249513	CCCTCCTTCATGTGGT-1_1_1_1	control
GSM7949203	GSM7949203|B_cell	B_cell	GSE249513	CCGGGATAGGACCACA-1_1_1_1	control
GSM7949203	GSM7949203|B_cell	B_cell	GSE249513	CCGGGATAGTTCGATC-1_1_1_1	control
GSM7949203	GSM7949203|B_cell	B_cell	GSE249513	CCGGGATCAGCGTTCG-1_1_1_1	control
GSM7949203	GSM7949203|B_cell	B_cell	GSE249513	CCGGGATCAGGTTTCA-1_1_1_1	control
GSM7949203	GSM7949203|B_cell	B_cell	GSE249513	CCGGGATCATAGACTC-1_1_1_1	control
GSM7949203	GSM7949203|B_cell	B_cell	GSE249513	CCGGGATTCCTTTCTC-1_1_1_1	control
GSM7949203	GSM7949203|B_cell	B_cell	GSE249513	CCGGTAGAGAACAACT-1_1_1_1	control
GSM7949203	GSM7949203|B_cell	B_cell	GSE249513	CCGGTAGAGACGACGT-1_1_1_1	control
GSM7949203	GSM7949203|B_cell	B_cell	GSE249513	CCGGTAGAGGTGGGTT-1_1_1_1	control
GSM7949203	GSM7949203|B_cell	B_cell	GSE249513	CCGGTAGCAGCAGTTT-1_1_1_1	control
GSM7949203	GSM7949203|B_cell	B_cell	GSE249513	CCGGTAGCAGGAACGT-1_1_1_1	control
GSM7949203	GSM7949203|B_cell	B_cell	GSE249513	CCGGTAGGTCCTAGCG-1_1_1_1	control
GSM7949203	GSM7949203|B_cell	B_cell	GSE249513	CCGGTAGGTCTCCATC-1_1_1_1	control
GSM7949203	GSM7949203|B_cell	B_cell	GSE249513	CCGGTAGTCCTCAATT-1_1_1_1	control
GSM7949203	GSM7949203|B_cell	B_cell	GSE249513	CCGTACTAGCGGCTTC-1_1_1_1	control
GSM7949203	GSM7949203|B_cell	B_cell	GSE249513	CCGTACTAGCTAGTTC-1_1_1_1	control
GSM7949203	GSM7949203|B_cell	B_cell	GSE249513	CCGTACTGTCGCTTCT-1_1_1_1	control
GSM7949203	GSM7949203|B_cell	B_cell	GSE249513	CCGTACTGTGTGCCTG-1_1_1_1	control
GSM7949203	GSM7949203|B_cell	B_cell	GSE249513	CCGTACTGTTTCGCTC-1_1_1_1	control
GSM7949203	GSM7949203|B_cell	B_cell	GSE249513	CCGTACTTCACCACCT-1_1_1_1	control
GSM7949203	GSM7949203|B_cell	B_cell	GSE249513	CCGTACTTCACGACTA-1_1_1_1	control
GSM7949203	GSM7949203|B_cell	B_cell	GSE249513	CCGTACTTCTGCAAGT-1_1_1_1	control
GSM7949203	GSM7949203|B_cell	B_cell	GSE249513	CCGTGGAAGCAGCGTA-1_1_1_1	control
GSM7949203	GSM7949203|B_cell	B_cell	GSE249513	CCGTGGAAGTAGGCCA-1_1_1_1	control
GSM7949203	GSM7949203|B_cell	B_cell	GSE249513	CCGTGGAAGTCATGCT-1_1_1_1	control
GSM7949203	GSM7949203|B_cell	B_cell	GSE249513	CCGTGGAAGTCTTGCA-1_1_1_1	control
GSM7949203	GSM7949203|B_cell	B_cell	GSE249513	CCGTGGAAGTGCTGCC-1_1_1_1	control
GSM7949203	GSM7949203|B_cell	B_cell	GSE249513	CCGTGGACAAGTACCT-1_1_1_1	control
GSM7949203	GSM7949203|B_cell	B_cell	GSE249513	CCGTGGACAATGGACG-1_1_1_1	control
GSM7949203	GSM7949203|B_cell	B_cell	GSE249513	CCGTGGAGTCGAGATG-1_1_1_1	control
GSM7949203	GSM7949203|B_cell	B_cell	GSE249513	CCGTGGATCGATAGAA-1_1_1_1	control
GSM7949203	GSM7949203|B_cell	B_cell	GSE249513	CCGTGGATCTCATTCA-1_1_1_1	control
GSM7949203	GSM7949203|B_cell	B_cell	GSE249513	CCGTTCAAGCCAACAG-1_1_1_1	control
GSM7949203	GSM7949203|B_cell	B_cell	GSE249513	CCGTTCAAGCTAAACA-1_1_1_1	control
GSM7949203	GSM7949203|B_cell	B_cell	GSE249513	CCGTTCAGTCAAAGAT-1_1_1_1	control
GSM7949203	GSM7949203|B_cell	B_cell	GSE249513	CCGTTCAGTCACCCAG-1_1_1_1	control
GSM7949203	GSM7949203|B_cell	B_cell	GSE249513	CCGTTCAGTCGCCATG-1_1_1_1	control
GSM7949203	GSM7949203|B_cell	B_cell	GSE249513	CCGTTCAGTCTTCAAG-1_1_1_1	control
GSM7949203	GSM7949203|B_cell	B_cell	GSE249513	CCGTTCATCAGCGATT-1_1_1_1	control
GSM7949203	GSM7949203|B_cell	B_cell	GSE249513	CCGTTCATCAGCTTAG-1_1_1_1	control
GSM7949203	GSM7949203|B_cell	B_cell	GSE249513	CCGTTCATCGGGAGTA-1_1_1_1	control
GSM7949203	GSM7949203|B_cell	B_cell	GSE249513	CCTAAAGAGATAGGAG-1_1_1_1	control
GSM7949203	GSM7949203|B_cell	B_cell	GSE249513	CCTAAAGAGCGATCCC-1_1_1_1	control
GSM7949203	GSM7949203|B_cell	B_cell	GSE249513	CCTAAAGAGTGAACAT-1_1_1_1	control
GSM7949203	GSM7949203|B_cell	B_cell	GSE249513	CCTAAAGCAAGGACTG-1_1_1_1	control
GSM7949203	GSM7949203|B_cell	B_cell	GSE249513	CCTAAAGCAAGGCTCC-1_1_1_1	control
GSM7949203	GSM7949203|B_cell	B_cell	GSE249513	CCTAAAGCAATGTAAG-1_1_1_1	control
GSM7949203	GSM7949203|B_cell	B_cell	GSE249513	CCTAAAGCACGAAAGC-1_1_1_1	control
GSM7949203	GSM7949203|B_cell	B_cell	GSE249513	CCTAAAGCACTTCGAA-1_1_1_1	control
GSM7949203	GSM7949203|B_cell	B_cell	GSE249513	CCTAAAGGTAACGTTC-1_1_1_1	control
GSM7949203	GSM7949203|B_cell	B_cell	GSE249513	CCTAAAGGTCGCTTTC-1_1_1_1	control
GSM7949203	GSM7949203|B_cell	B_cell	GSE249513	CCTAAAGGTTGAGGTG-1_1_1_1	control
GSM7949203	GSM7949203|B_cell	B_cell	GSE249513	CCTAAAGTCGGCATCG-1_1_1_1	control
GSM7949203	GSM7949203|B_cell	B_cell	GSE249513	CCTAAAGTCGTCTGAA-1_1_1_1	control
GSM7949203	GSM7949203|B_cell	B_cell	GSE249513	CCTACACAGGAGTCTG-1_1_1_1	control
GSM7949203	GSM7949203|B_cell	B_cell	GSE249513	CCTACACAGGGCTTCC-1_1_1_1	control
GSM7949203	GSM7949203|B_cell	B_cell	GSE249513	CCTACACAGTGCTGCC-1_1_1_1	control
GSM7949203	GSM7949203|B_cell	B_cell	GSE249513	CCTACACCATCGATGT-1_1_1_1	control
GSM7949203	GSM7949203|B_cell	B_cell	GSE249513	CCTACACGTCTTCTCG-1_1_1_1	control
GSM7949203	GSM7949203|B_cell	B_cell	GSE249513	CCTACACGTGCTCTTC-1_1_1_1	control
GSM7949203	GSM7949203|B_cell	B_cell	GSE249513	CCTACACGTTTACTCT-1_1_1_1	control
GSM7949203	GSM7949203|B_cell	B_cell	GSE249513	CCTACACTCAAGCCTA-1_1_1_1	control
GSM7949203	GSM7949203|B_cell	B_cell	GSE249513	CCTACACTCTTTCCTC-1_1_1_1	control
GSM7949203	GSM7949203|B_cell	B_cell	GSE249513	CCTACCAAGAAGGCCT-1_1_1_1	control
GSM7949203	GSM7949203|B_cell	B_cell	GSE249513	CCTACCAAGCCGGTAA-1_1_1_1	control
GSM7949203	GSM7949203|B_cell	B_cell	GSE249513	CCTACCAAGCGTAGTG-1_1_1_1	control
GSM7949203	GSM7949203|B_cell	B_cell	GSE249513	CCTACCAAGCTGCAAG-1_1_1_1	control
GSM7949203	GSM7949203|B_cell	B_cell	GSE249513	CCTACCAAGGACATTA-1_1_1_1	control
GSM7949203	GSM7949203|B_cell	B_cell	GSE249513	CCTACCAAGGAGCGTT-1_1_1_1	control
GSM7949203	GSM7949203|B_cell	B_cell	GSE249513	CCTACCAAGGGATGGG-1_1_1_1	control
GSM7949203	GSM7949203|B_cell	B_cell	GSE249513	CCTACCACACAGAGGT-1_1_1_1	control
GSM7949203	GSM7949203|B_cell	B_cell	GSE249513	CCTACCAGTAAGTGGC-1_1_1_1	control
GSM7949203	GSM7949203|B_cell	B_cell	GSE249513	CCTACCATCGTTGACA-1_1_1_1	control
GSM7949203	GSM7949203|B_cell	B_cell	GSE249513	CCTAGCTAGAGCAATT-1_1_1_1	control
GSM7949203	GSM7949203|B_cell	B_cell	GSE249513	CCTAGCTAGATAGGAG-1_1_1_1	control
GSM7949203	GSM7949203|B_cell	B_cell	GSE249513	CCTAGCTAGCGTCAAG-1_1_1_1	control
GSM7949203	GSM7949203|B_cell	B_cell	GSE249513	CCTAGCTCAATCGGTT-1_1_1_1	control
GSM7949203	GSM7949203|B_cell	B_cell	GSE249513	CCTAGCTCACGTCAGC-1_1_1_1	control
GSM7949203	GSM7949203|B_cell	B_cell	GSE249513	CCTAGCTCAGCCACCA-1_1_1_1	control
GSM7949203	GSM7949203|B_cell	B_cell	GSE249513	CCTAGCTCATTTCACT-1_1_1_1	control
GSM7949203	GSM7949203|B_cell	B_cell	GSE249513	CCTAGCTGTCGACTAT-1_1_1_1	control
GSM7949203	GSM7949203|B_cell	B_cell	GSE249513	CCTAGCTGTCGTTGTA-1_1_1_1	control
GSM7949203	GSM7949203|B_cell	B_cell	GSE249513	CCTATTAAGAAACGAG-1_1_1_1	control
GSM7949203	GSM7949203|B_cell	B_cell	GSE249513	CCTATTACATCACGAT-1_1_1_1	control
GSM7949203	GSM7949203|B_cell	B_cell	GSE249513	CCTATTAGTCACCCAG-1_1_1_1	control
GSM7949203	GSM7949203|B_cell	B_cell	GSE249513	CCTATTATCTTACCTA-1_1_1_1	control
GSM7949203	GSM7949203|B_cell	B_cell	GSE249513	CCTCAGTAGAGCTGGT-1_1_1_1	control
GSM7949203	GSM7949203|B_cell	B_cell	GSE249513	CCTCAGTAGATAGTCA-1_1_1_1	control
GSM7949203	GSM7949203|B_cell	B_cell	GSE249513	CCTCAGTCATTGGGCC-1_1_1_1	control
GSM7949203	GSM7949203|B_cell	B_cell	GSE249513	CCTCAGTGTTGGTAAA-1_1_1_1	control
GSM7949203	GSM7949203|B_cell	B_cell	GSE249513	CCTCAGTTCATGGTCA-1_1_1_1	control
GSM7949203	GSM7949203|B_cell	B_cell	GSE249513	CCTCAGTTCCAAACAC-1_1_1_1	control
GSM7949203	GSM7949203|B_cell	B_cell	GSE249513	CCTCAGTTCGATGAGG-1_1_1_1	control
GSM7949203	GSM7949203|B_cell	B_cell	GSE249513	CCTCAGTTCTAACCGA-1_1_1_1	control
GSM7949203	GSM7949203|B_cell	B_cell	GSE249513	CCTCTGAAGAACTCGG-1_1_1_1	control
GSM7949203	GSM7949203|B_cell	B_cell	GSE249513	CCTCTGAAGGGAAACA-1_1_1_1	control
GSM7949203	GSM7949203|B_cell	B_cell	GSE249513	CCTCTGACACCGTTGG-1_1_1_1	control
GSM7949203	GSM7949203|B_cell	B_cell	GSE249513	CCTCTGACACTGTCGG-1_1_1_1	control
GSM7949203	GSM7949203|B_cell	B_cell	GSE249513	CCTCTGACAGTGACAG-1_1_1_1	control
GSM7949203	GSM7949203|B_cell	B_cell	GSE249513	CCTCTGAGTTCAGACT-1_1_1_1	control
GSM7949203	GSM7949203|B_cell	B_cell	GSE249513	CCTCTGATCCTGTACC-1_1_1_1	control
GSM7949203	GSM7949203|B_cell	B_cell	GSE249513	CCTCTGATCTGAGTGT-1_1_1_1	control
GSM7949203	GSM7949203|B_cell	B_cell	GSE249513	CCTTACGAGTACATGA-1_1_1_1	control
GSM7949203	GSM7949203|B_cell	B_cell	GSE249513	CCTTACGCACCTGGTG-1_1_1_1	control
GSM7949203	GSM7949203|B_cell	B_cell	GSE249513	CCTTACGCATAAGACA-1_1_1_1	control
GSM7949203	GSM7949203|B_cell	B_cell	GSE249513	CCTTACGGTACTCGCG-1_1_1_1	control
GSM7949203	GSM7949203|B_cell	B_cell	GSE249513	CCTTACGTCAACCAAC-1_1_1_1	control
GSM7949203	GSM7949203|B_cell	B_cell	GSE249513	CCTTACGTCCACTCCA-1_1_1_1	control
GSM7949203	GSM7949203|B_cell	B_cell	GSE249513	CCTTACGTCCCGACTT-1_1_1_1	control
GSM7949203	GSM7949203|B_cell	B_cell	GSE249513	CCTTACGTCTAGAGTC-1_1_1_1	control
GSM7949203	GSM7949203|B_cell	B_cell	GSE249513	CCTTACGTCTGTCTCG-1_1_1_1	control
GSM7949203	GSM7949203|B_cell	B_cell	GSE249513	CCTTACGTCTTCGGTC-1_1_1_1	control
GSM7949203	GSM7949203|B_cell	B_cell	GSE249513	CCTTCCCAGGATTCGG-1_1_1_1	control
GSM7949203	GSM7949203|B_cell	B_cell	GSE249513	CCTTCCCAGTACGACG-1_1_1_1	control
GSM7949203	GSM7949203|B_cell	B_cell	GSE249513	CCTTCCCAGTGATCGG-1_1_1_1	control
GSM7949203	GSM7949203|B_cell	B_cell	GSE249513	CCTTCCCCAAACTGCT-1_1_1_1	control
GSM7949203	GSM7949203|B_cell	B_cell	GSE249513	CCTTCCCCAAAGCAAT-1_1_1_1	control
GSM7949203	GSM7949203|B_cell	B_cell	GSE249513	CCTTCCCCAGTTCATG-1_1_1_1	control
GSM7949203	GSM7949203|B_cell	B_cell	GSE249513	CCTTCCCCATTACCTT-1_1_1_1	control
GSM7949203	GSM7949203|B_cell	B_cell	GSE249513	CCTTCCCCATTGCGGC-1_1_1_1	control
GSM7949203	GSM7949203|B_cell	B_cell	GSE249513	CCTTCCCGTAGCACGA-1_1_1_1	control
GSM7949203	GSM7949203|B_cell	B_cell	GSE249513	CCTTCCCGTCATGCAT-1_1_1_1	control
GSM7949203	GSM7949203|B_cell	B_cell	GSE249513	CCTTCCCGTCCATGAT-1_1_1_1	control
GSM7949203	GSM7949203|B_cell	B_cell	GSE249513	CCTTCCCTCTACGAGT-1_1_1_1	control
GSM7949203	GSM7949203|B_cell	B_cell	GSE249513	CCTTCGAAGCCTTGAT-1_1_1_1	control
GSM7949203	GSM7949203|B_cell	B_cell	GSE249513	CCTTCGACAGTCACTA-1_1_1_1	control
GSM7949203	GSM7949203|B_cell	B_cell	GSE249513	CCTTCGAGTCTCCATC-1_1_1_1	control
GSM7949203	GSM7949203|B_cell	B_cell	GSE249513	CCTTCGAGTGTATGGG-1_1_1_1	control
GSM7949203	GSM7949203|B_cell	B_cell	GSE249513	CCTTCGAGTTCTCATT-1_1_1_1	control
GSM7949203	GSM7949203|B_cell	B_cell	GSE249513	CCTTCGATCACAAACC-1_1_1_1	control
GSM7949203	GSM7949203|B_cell	B_cell	GSE249513	CCTTCGATCATCACCC-1_1_1_1	control
GSM7949203	GSM7949203|B_cell	B_cell	GSE249513	CCTTTCTCAAACGCGA-1_1_1_1	control
GSM7949203	GSM7949203|B_cell	B_cell	GSE249513	CCTTTCTCAGCAGTTT-1_1_1_1	control
GSM7949203	GSM7949203|B_cell	B_cell	GSE249513	CCTTTCTCATGTAAGA-1_1_1_1	control
GSM7949203	GSM7949203|B_cell	B_cell	GSE249513	CCTTTCTGTCGACTAT-1_1_1_1	control
GSM7949203	GSM7949203|B_cell	B_cell	GSE249513	CCTTTCTGTTATGTGC-1_1_1_1	control
GSM7949203	GSM7949203|B_cell	B_cell	GSE249513	CCTTTCTTCCATGAAC-1_1_1_1	control
GSM7949203	GSM7949203|B_cell	B_cell	GSE249513	CCTTTCTTCTAACCGA-1_1_1_1	control
GSM7949203	GSM7949203|B_cell	B_cell	GSE249513	CCTTTCTTCTGGTGTA-1_1_1_1	control
GSM7949203	GSM7949203|B_cell	B_cell	GSE249513	CGAACATAGAAGGGTA-1_1_1_1	control
GSM7949203	GSM7949203|B_cell	B_cell	GSE249513	CGAACATAGCGATATA-1_1_1_1	control
GSM7949203	GSM7949203|B_cell	B_cell	GSE249513	CGAACATAGCGCTTAT-1_1_1_1	control
GSM7949203	GSM7949203|B_cell	B_cell	GSE249513	CGAACATAGGCTACGA-1_1_1_1	control
GSM7949203	GSM7949203|B_cell	B_cell	GSE249513	CGAACATAGGTCATCT-1_1_1_1	control
GSM7949203	GSM7949203|B_cell	B_cell	GSE249513	CGAACATAGTCTCAAC-1_1_1_1	control
GSM7949203	GSM7949203|B_cell	B_cell	GSE249513	CGAACATCACTGTCGG-1_1_1_1	control
GSM7949203	GSM7949203|B_cell	B_cell	GSE249513	CGAACATCAGATCTGT-1_1_1_1	control
GSM7949203	GSM7949203|B_cell	B_cell	GSE249513	CGAACATCATCCGCGA-1_1_1_1	control
GSM7949203	GSM7949203|B_cell	B_cell	GSE249513	CGAACATGTCAATACC-1_1_1_1	control
GSM7949203	GSM7949203|B_cell	B_cell	GSE249513	CGAACATGTTACAGAA-1_1_1_1	control
GSM7949203	GSM7949203|B_cell	B_cell	GSE249513	CGAACATGTTTGGCGC-1_1_1_1	control
GSM7949203	GSM7949203|B_cell	B_cell	GSE249513	CGAACATTCCAAGCCG-1_1_1_1	control
GSM7949203	GSM7949203|B_cell	B_cell	GSE249513	CGAACATTCGTAGGAG-1_1_1_1	control
GSM7949203	GSM7949203|B_cell	B_cell	GSE249513	CGAATGTAGACTTTCG-1_1_1_1	control
GSM7949203	GSM7949203|B_cell	B_cell	GSE249513	CGAATGTAGATCTGCT-1_1_1_1	control
GSM7949203	GSM7949203|B_cell	B_cell	GSE249513	CGAATGTCAGTGAGTG-1_1_1_1	control
GSM7949203	GSM7949203|B_cell	B_cell	GSE249513	CGAATGTCATAGAAAC-1_1_1_1	control
GSM7949203	GSM7949203|B_cell	B_cell	GSE249513	CGAATGTCATCCGGGT-1_1_1_1	control
GSM7949203	GSM7949203|B_cell	B_cell	GSE249513	CGAATGTGTAGAGGAA-1_1_1_1	control
GSM7949203	GSM7949203|B_cell	B_cell	GSE249513	CGAATGTTCCTCATTA-1_1_1_1	control
GSM7949203	GSM7949203|B_cell	B_cell	GSE249513	CGACCTTAGAAACGCC-1_1_1_1	control
GSM7949203	GSM7949203|B_cell	B_cell	GSE249513	CGACCTTAGGCAATTA-1_1_1_1	control
GSM7949203	GSM7949203|B_cell	B_cell	GSE249513	CGACCTTCAGCTGGCT-1_1_1_1	control
GSM7949203	GSM7949203|B_cell	B_cell	GSE249513	CGACCTTCAGGTCCAC-1_1_1_1	control
GSM7949203	GSM7949203|B_cell	B_cell	GSE249513	CGACCTTCATGTAGTC-1_1_1_1	control
GSM7949203	GSM7949203|B_cell	B_cell	GSE249513	CGACCTTGTATATGGA-1_1_1_1	control
GSM7949203	GSM7949203|B_cell	B_cell	GSE249513	CGACCTTGTCCCGACA-1_1_1_1	control
GSM7949203	GSM7949203|B_cell	B_cell	GSE249513	CGACCTTGTCTCACCT-1_1_1_1	control
GSM7949203	GSM7949203|B_cell	B_cell	GSE249513	CGACCTTGTCTTCGTC-1_1_1_1	control
GSM7949203	GSM7949203|B_cell	B_cell	GSE249513	CGACCTTGTTAGAACA-1_1_1_1	control
GSM7949203	GSM7949203|B_cell	B_cell	GSE249513	CGACCTTGTTCAGCGC-1_1_1_1	control
GSM7949203	GSM7949203|B_cell	B_cell	GSE249513	CGACCTTGTTCTGGTA-1_1_1_1	control
GSM7949203	GSM7949203|B_cell	B_cell	GSE249513	CGACCTTTCCGTAGGC-1_1_1_1	control
GSM7949203	GSM7949203|B_cell	B_cell	GSE249513	CGACCTTTCTTGCCGT-1_1_1_1	control
GSM7949203	GSM7949203|B_cell	B_cell	GSE249513	CGACTTCAGAGTACCG-1_1_1_1	control
GSM7949203	GSM7949203|B_cell	B_cell	GSE249513	CGACTTCAGGCATGGT-1_1_1_1	control
GSM7949203	GSM7949203|B_cell	B_cell	GSE249513	CGACTTCAGGTAGCTG-1_1_1_1	control
GSM7949203	GSM7949203|B_cell	B_cell	GSE249513	CGACTTCCACCTCGTT-1_1_1_1	control
GSM7949203	GSM7949203|B_cell	B_cell	GSE249513	CGACTTCCATGTAAGA-1_1_1_1	control
GSM7949203	GSM7949203|B_cell	B_cell	GSE249513	CGACTTCGTAGTGAAT-1_1_1_1	control
GSM7949203	GSM7949203|B_cell	B_cell	GSE249513	CGACTTCGTCTTGCGG-1_1_1_1	control
GSM7949203	GSM7949203|B_cell	B_cell	GSE249513	CGACTTCTCAACGGGA-1_1_1_1	control
GSM7949203	GSM7949203|B_cell	B_cell	GSE249513	CGACTTCTCAGTTGAC-1_1_1_1	control
GSM7949203	GSM7949203|B_cell	B_cell	GSE249513	CGACTTCTCCGCATAA-1_1_1_1	control
GSM7949203	GSM7949203|B_cell	B_cell	GSE249513	CGACTTCTCGGTGTCG-1_1_1_1	control
GSM7949203	GSM7949203|B_cell	B_cell	GSE249513	CGAGAAGAGAGGTACC-1_1_1_1	control
GSM7949203	GSM7949203|B_cell	B_cell	GSE249513	CGAGAAGAGAGGTTGC-1_1_1_1	control
GSM7949203	GSM7949203|B_cell	B_cell	GSE249513	CGAGAAGCAAACGTGG-1_1_1_1	control
GSM7949203	GSM7949203|B_cell	B_cell	GSE249513	CGAGAAGCACCGAAAG-1_1_1_1	control
GSM7949203	GSM7949203|B_cell	B_cell	GSE249513	CGAGAAGCATCTCCCA-1_1_1_1	control
GSM7949203	GSM7949203|B_cell	B_cell	GSE249513	CGAGAAGGTCACCCAG-1_1_1_1	control
GSM7949203	GSM7949203|B_cell	B_cell	GSE249513	CGAGAAGGTCATACTG-1_1_1_1	control
GSM7949203	GSM7949203|B_cell	B_cell	GSE249513	CGAGAAGGTCGAGATG-1_1_1_1	control
GSM7949203	GSM7949203|B_cell	B_cell	GSE249513	CGAGAAGGTCTTGCGG-1_1_1_1	control
GSM7949203	GSM7949203|B_cell	B_cell	GSE249513	CGAGAAGGTGTTCTTT-1_1_1_1	control
GSM7949203	GSM7949203|B_cell	B_cell	GSE249513	CGAGAAGTCGGTTAAC-1_1_1_1	control
GSM7949203	GSM7949203|B_cell	B_cell	GSE249513	CGAGAAGTCTAAGCCA-1_1_1_1	control
GSM7949203	GSM7949203|B_cell	B_cell	GSE249513	CGAGCACAGCGTGTCC-1_1_1_1	control
GSM7949203	GSM7949203|B_cell	B_cell	GSE249513	CGAGCACCAAATCCGT-1_1_1_1	control
GSM7949203	GSM7949203|B_cell	B_cell	GSE249513	CGAGCACCACTTAAGC-1_1_1_1	control
GSM7949203	GSM7949203|B_cell	B_cell	GSE249513	CGAGCACCAGTCAGAG-1_1_1_1	control
GSM7949203	GSM7949203|B_cell	B_cell	GSE249513	CGAGCACCAGTGGAGT-1_1_1_1	control
GSM7949203	GSM7949203|B_cell	B_cell	GSE249513	CGAGCACCATCGACGC-1_1_1_1	control
GSM7949203	GSM7949203|B_cell	B_cell	GSE249513	CGAGCACCATTGTGCA-1_1_1_1	control
GSM7949203	GSM7949203|B_cell	B_cell	GSE249513	CGAGCACGTCATGCAT-1_1_1_1	control
GSM7949203	GSM7949203|B_cell	B_cell	GSE249513	CGAGCACGTGATGCCC-1_1_1_1	control
GSM7949203	GSM7949203|B_cell	B_cell	GSE249513	CGAGCACTCAGCTGGC-1_1_1_1	control
GSM7949203	GSM7949203|B_cell	B_cell	GSE249513	CGAGCACTCCACGAAT-1_1_1_1	control
GSM7949203	GSM7949203|B_cell	B_cell	GSE249513	CGAGCCAAGGAATGGA-1_1_1_1	control
GSM7949203	GSM7949203|B_cell	B_cell	GSE249513	CGAGCCAAGTAGTGCG-1_1_1_1	control
GSM7949203	GSM7949203|B_cell	B_cell	GSE249513	CGAGCCACACCAGATT-1_1_1_1	control
GSM7949203	GSM7949203|B_cell	B_cell	GSE249513	CGAGCCAGTATTAGCC-1_1_1_1	control
GSM7949203	GSM7949203|B_cell	B_cell	GSE249513	CGAGCCAGTCAGTGGA-1_1_1_1	control
GSM7949203	GSM7949203|B_cell	B_cell	GSE249513	CGAGCCAGTCCGTTAA-1_1_1_1	control
GSM7949203	GSM7949203|B_cell	B_cell	GSE249513	CGAGCCAGTGAGGCTA-1_1_1_1	control
GSM7949203	GSM7949203|B_cell	B_cell	GSE249513	CGAGCCAGTGGTGTAG-1_1_1_1	control
GSM7949203	GSM7949203|B_cell	B_cell	GSE249513	CGAGCCATCTGACCTC-1_1_1_1	control
GSM7949203	GSM7949203|B_cell	B_cell	GSE249513	CGATCGGAGATGCCAG-1_1_1_1	control
GSM7949203	GSM7949203|B_cell	B_cell	GSE249513	CGATCGGAGTGGTAAT-1_1_1_1	control
GSM7949203	GSM7949203|B_cell	B_cell	GSE249513	CGATCGGCATCCGTGG-1_1_1_1	control
GSM7949203	GSM7949203|B_cell	B_cell	GSE249513	CGATCGGGTCTAAAGA-1_1_1_1	control
GSM7949203	GSM7949203|B_cell	B_cell	GSE249513	CGATCGGTCTCGCATC-1_1_1_1	control
GSM7949203	GSM7949203|B_cell	B_cell	GSE249513	CGATCGGTCTTAACCT-1_1_1_1	control
GSM7949203	GSM7949203|B_cell	B_cell	GSE249513	CGATCGGTCTTGAGGT-1_1_1_1	control
GSM7949203	GSM7949203|B_cell	B_cell	GSE249513	CGATGGCCAAAGCGGT-1_1_1_1	control
GSM7949203	GSM7949203|B_cell	B_cell	GSE249513	CGATGGCCACAGAGGT-1_1_1_1	control
GSM7949203	GSM7949203|B_cell	B_cell	GSE249513	CGATGGCCACCCATGG-1_1_1_1	control
GSM7949203	GSM7949203|B_cell	B_cell	GSE249513	CGATGGCCAGTGGAGT-1_1_1_1	control
GSM7949203	GSM7949203|B_cell	B_cell	GSE249513	CGATGGCGTACTTGAC-1_1_1_1	control
GSM7949203	GSM7949203|B_cell	B_cell	GSE249513	CGATGGCGTCAGAATA-1_1_1_1	control
GSM7949203	GSM7949203|B_cell	B_cell	GSE249513	CGATGGCGTTCACCTC-1_1_1_1	control
GSM7949203	GSM7949203|B_cell	B_cell	GSE249513	CGATGGCGTTGCCTCT-1_1_1_1	control
GSM7949203	GSM7949203|B_cell	B_cell	GSE249513	CGATGGCTCGTTTGCC-1_1_1_1	control
GSM7949203	GSM7949203|B_cell	B_cell	GSE249513	CGATGTAAGACAAAGG-1_1_1_1	control
GSM7949203	GSM7949203|B_cell	B_cell	GSE249513	CGATGTAAGCAGATCG-1_1_1_1	control
GSM7949203	GSM7949203|B_cell	B_cell	GSE249513	CGATGTAAGGATGGTC-1_1_1_1	control
GSM7949203	GSM7949203|B_cell	B_cell	GSE249513	CGATGTAAGTAAGTAC-1_1_1_1	control
GSM7949203	GSM7949203|B_cell	B_cell	GSE249513	CGATGTAAGTGCCATT-1_1_1_1	control
GSM7949203	GSM7949203|B_cell	B_cell	GSE249513	CGATGTACAAGTAGTA-1_1_1_1	control
GSM7949203	GSM7949203|B_cell	B_cell	GSE249513	CGATGTAGTGTTCGAT-1_1_1_1	control
GSM7949203	GSM7949203|B_cell	B_cell	GSE249513	CGATGTAGTTCAGGCC-1_1_1_1	control
GSM7949203	GSM7949203|B_cell	B_cell	GSE249513	CGATGTATCTGGGCCA-1_1_1_1	control
GSM7949203	GSM7949203|B_cell	B_cell	GSE249513	CGATTGAAGGCTACGA-1_1_1_1	control
GSM7949203	GSM7949203|B_cell	B_cell	GSE249513	CGATTGAAGTACGCGA-1_1_1_1	control
GSM7949203	GSM7949203|B_cell	B_cell	GSE249513	CGATTGAAGTTAGCGG-1_1_1_1	control
GSM7949203	GSM7949203|B_cell	B_cell	GSE249513	CGATTGAGTGAGCGAT-1_1_1_1	control
GSM7949203	GSM7949203|B_cell	B_cell	GSE249513	CGATTGATCACAATGC-1_1_1_1	control
GSM7949203	GSM7949203|B_cell	B_cell	GSE249513	CGATTGATCCAATGGT-1_1_1_1	control
GSM7949203	GSM7949203|B_cell	B_cell	GSE249513	CGATTGATCTGTGCAA-1_1_1_1	control
GSM7949203	GSM7949203|B_cell	B_cell	GSE249513	CGCCAAGAGGCTATCT-1_1_1_1	control
GSM7949203	GSM7949203|B_cell	B_cell	GSE249513	CGCCAAGAGTGCAAGC-1_1_1_1	control
GSM7949203	GSM7949203|B_cell	B_cell	GSE249513	CGCCAAGCAAATCCGT-1_1_1_1	control
GSM7949203	GSM7949203|B_cell	B_cell	GSE249513	CGCCAAGCAATTCCTT-1_1_1_1	control
GSM7949203	GSM7949203|B_cell	B_cell	GSE249513	CGCCAAGCATGGGAAC-1_1_1_1	control
GSM7949203	GSM7949203|B_cell	B_cell	GSE249513	CGCCAAGCATTTCAGG-1_1_1_1	control
GSM7949203	GSM7949203|B_cell	B_cell	GSE249513	CGCCAAGGTCGCTTTC-1_1_1_1	control
GSM7949203	GSM7949203|B_cell	B_cell	GSE249513	CGCCAAGGTGTTGAGG-1_1_1_1	control
GSM7949203	GSM7949203|B_cell	B_cell	GSE249513	CGCCAAGTCCCGACTT-1_1_1_1	control
GSM7949203	GSM7949203|B_cell	B_cell	GSE249513	CGCCAAGTCTACTCAT-1_1_1_1	control
GSM7949203	GSM7949203|B_cell	B_cell	GSE249513	CGCGGTAAGAAGGACA-1_1_1_1	control
GSM7949203	GSM7949203|B_cell	B_cell	GSE249513	CGCGGTAAGATCCCAT-1_1_1_1	control
GSM7949203	GSM7949203|B_cell	B_cell	GSE249513	CGCGGTAAGGGATGGG-1_1_1_1	control
GSM7949203	GSM7949203|B_cell	B_cell	GSE249513	CGCGGTACAAGCCGTC-1_1_1_1	control
GSM7949203	GSM7949203|B_cell	B_cell	GSE249513	CGCGGTAGTAAACCTC-1_1_1_1	control
GSM7949203	GSM7949203|B_cell	B_cell	GSE249513	CGCGGTAGTGTATGGG-1_1_1_1	control
GSM7949203	GSM7949203|B_cell	B_cell	GSE249513	CGCGGTAGTTATCACG-1_1_1_1	control
GSM7949203	GSM7949203|B_cell	B_cell	GSE249513	CGCGGTATCAACGGCC-1_1_1_1	control
GSM7949203	GSM7949203|B_cell	B_cell	GSE249513	CGCGGTATCACCTCGT-1_1_1_1	control
GSM7949203	GSM7949203|B_cell	B_cell	GSE249513	CGCGGTATCTATCGCC-1_1_1_1	control
GSM7949203	GSM7949203|B_cell	B_cell	GSE249513	CGCGTTTAGATCCCAT-1_1_1_1	control
GSM7949203	GSM7949203|B_cell	B_cell	GSE249513	CGCGTTTAGGGTATCG-1_1_1_1	control
GSM7949203	GSM7949203|B_cell	B_cell	GSE249513	CGCGTTTCACCTATCC-1_1_1_1	control
GSM7949203	GSM7949203|B_cell	B_cell	GSE249513	CGCGTTTGTCTAGTGT-1_1_1_1	control
GSM7949203	GSM7949203|B_cell	B_cell	GSE249513	CGCGTTTGTGATGCCC-1_1_1_1	control
GSM7949203	GSM7949203|B_cell	B_cell	GSE249513	CGCGTTTGTGGCGAAT-1_1_1_1	control
GSM7949203	GSM7949203|B_cell	B_cell	GSE249513	CGCGTTTGTTCCAACA-1_1_1_1	control
GSM7949203	GSM7949203|B_cell	B_cell	GSE249513	CGCGTTTGTTGCTCCT-1_1_1_1	control
GSM7949203	GSM7949203|B_cell	B_cell	GSE249513	CGCGTTTTCAACACAC-1_1_1_1	control
GSM7949203	GSM7949203|B_cell	B_cell	GSE249513	CGCGTTTTCAGTTTGG-1_1_1_1	control
GSM7949203	GSM7949203|B_cell	B_cell	GSE249513	CGCGTTTTCTTTAGGG-1_1_1_1	control
GSM7949203	GSM7949203|B_cell	B_cell	GSE249513	CGCTATCAGAAACCAT-1_1_1_1	control
GSM7949203	GSM7949203|B_cell	B_cell	GSE249513	CGCTATCAGACGACGT-1_1_1_1	control
GSM7949203	GSM7949203|B_cell	B_cell	GSE249513	CGCTATCAGCAATATG-1_1_1_1	control
GSM7949203	GSM7949203|B_cell	B_cell	GSE249513	CGCTATCAGCCACCTG-1_1_1_1	control
GSM7949203	GSM7949203|B_cell	B_cell	GSE249513	CGCTATCAGGATTCGG-1_1_1_1	control
GSM7949203	GSM7949203|B_cell	B_cell	GSE249513	CGCTATCAGTCTCCTC-1_1_1_1	control
GSM7949203	GSM7949203|B_cell	B_cell	GSE249513	CGCTATCCAATCACAC-1_1_1_1	control
GSM7949203	GSM7949203|B_cell	B_cell	GSE249513	CGCTATCTCACTCTTA-1_1_1_1	control
GSM7949203	GSM7949203|B_cell	B_cell	GSE249513	CGCTATCTCACTTACT-1_1_1_1	control
GSM7949203	GSM7949203|B_cell	B_cell	GSE249513	CGCTGGACAAAGTCAA-1_1_1_1	control
GSM7949203	GSM7949203|B_cell	B_cell	GSE249513	CGCTGGACAAATCCGT-1_1_1_1	control
GSM7949203	GSM7949203|B_cell	B_cell	GSE249513	CGCTGGACAAGAGTCG-1_1_1_1	control
GSM7949203	GSM7949203|B_cell	B_cell	GSE249513	CGCTGGACATCGATTG-1_1_1_1	control
GSM7949203	GSM7949203|B_cell	B_cell	GSE249513	CGCTGGACATTTCACT-1_1_1_1	control
GSM7949203	GSM7949203|B_cell	B_cell	GSE249513	CGCTGGAGTATCACCA-1_1_1_1	control
GSM7949203	GSM7949203|B_cell	B_cell	GSE249513	CGCTGGAGTATTAGCC-1_1_1_1	control
GSM7949203	GSM7949203|B_cell	B_cell	GSE249513	CGCTGGAGTGGACGAT-1_1_1_1	control
GSM7949203	GSM7949203|B_cell	B_cell	GSE249513	CGCTGGATCACTGGGC-1_1_1_1	control
GSM7949203	GSM7949203|B_cell	B_cell	GSE249513	CGCTGGATCGCGTAGC-1_1_1_1	control
GSM7949203	GSM7949203|B_cell	B_cell	GSE249513	CGCTGGATCTTGTACT-1_1_1_1	control
GSM7949203	GSM7949203|B_cell	B_cell	GSE249513	CGCTTCAAGAAACGAG-1_1_1_1	control
GSM7949203	GSM7949203|B_cell	B_cell	GSE249513	CGCTTCAAGAATTGTG-1_1_1_1	control
GSM7949203	GSM7949203|B_cell	B_cell	GSE249513	CGCTTCAAGATGCGAC-1_1_1_1	control
GSM7949203	GSM7949203|B_cell	B_cell	GSE249513	CGCTTCAAGTGTTAGA-1_1_1_1	control
GSM7949203	GSM7949203|B_cell	B_cell	GSE249513	CGCTTCACAAGGGTCA-1_1_1_1	control
GSM7949203	GSM7949203|B_cell	B_cell	GSE249513	CGCTTCAGTACTTGAC-1_1_1_1	control
GSM7949203	GSM7949203|B_cell	B_cell	GSE249513	CGCTTCAGTCAAACTC-1_1_1_1	control
GSM7949203	GSM7949203|B_cell	B_cell	GSE249513	CGCTTCAGTCATACTG-1_1_1_1	control
GSM7949203	GSM7949203|B_cell	B_cell	GSE249513	CGCTTCAGTCATGCCG-1_1_1_1	control
GSM7949203	GSM7949203|B_cell	B_cell	GSE249513	CGCTTCATCAGTACGT-1_1_1_1	control
GSM7949203	GSM7949203|B_cell	B_cell	GSE249513	CGCTTCATCTCTTATG-1_1_1_1	control
GSM7949203	GSM7949203|B_cell	B_cell	GSE249513	CGGACACAGAAACGAG-1_1_1_1	control
GSM7949203	GSM7949203|B_cell	B_cell	GSE249513	CGGACACAGCCAGAAC-1_1_1_1	control
GSM7949203	GSM7949203|B_cell	B_cell	GSE249513	CGGACACCAGGTCCAC-1_1_1_1	control
GSM7949203	GSM7949203|B_cell	B_cell	GSE249513	CGGACACCAGGTTTCA-1_1_1_1	control
GSM7949203	GSM7949203|B_cell	B_cell	GSE249513	CGGACACCAGTATCTG-1_1_1_1	control
GSM7949203	GSM7949203|B_cell	B_cell	GSE249513	CGGACACGTAATAGCA-1_1_1_1	control
GSM7949203	GSM7949203|B_cell	B_cell	GSE249513	CGGACACGTACAGTTC-1_1_1_1	control
GSM7949203	GSM7949203|B_cell	B_cell	GSE249513	CGGACACGTTTAAGCC-1_1_1_1	control
GSM7949203	GSM7949203|B_cell	B_cell	GSE249513	CGGACACTCACAATGC-1_1_1_1	control
GSM7949203	GSM7949203|B_cell	B_cell	GSE249513	CGGACACTCGTTACGA-1_1_1_1	control
GSM7949203	GSM7949203|B_cell	B_cell	GSE249513	CGGACGTAGAGCTGGT-1_1_1_1	control
GSM7949203	GSM7949203|B_cell	B_cell	GSE249513	CGGACGTAGCTAAACA-1_1_1_1	control
GSM7949203	GSM7949203|B_cell	B_cell	GSE249513	CGGACGTCAAGTTGTC-1_1_1_1	control
GSM7949203	GSM7949203|B_cell	B_cell	GSE249513	CGGACGTCACACAGAG-1_1_1_1	control
GSM7949203	GSM7949203|B_cell	B_cell	GSE249513	CGGACGTCAGCATGAG-1_1_1_1	control
GSM7949203	GSM7949203|B_cell	B_cell	GSE249513	CGGACGTCATGGATGG-1_1_1_1	control
GSM7949203	GSM7949203|B_cell	B_cell	GSE249513	CGGACGTGTTTCGCTC-1_1_1_1	control
GSM7949203	GSM7949203|B_cell	B_cell	GSE249513	CGGACGTTCCACGACG-1_1_1_1	control
GSM7949203	GSM7949203|B_cell	B_cell	GSE249513	CGGACTGAGACAAAGG-1_1_1_1	control
GSM7949203	GSM7949203|B_cell	B_cell	GSE249513	CGGACTGAGATGTAAC-1_1_1_1	control
GSM7949203	GSM7949203|B_cell	B_cell	GSE249513	CGGACTGAGGAATTAC-1_1_1_1	control
GSM7949203	GSM7949203|B_cell	B_cell	GSE249513	CGGACTGAGGATCGCA-1_1_1_1	control
GSM7949203	GSM7949203|B_cell	B_cell	GSE249513	CGGACTGAGGGAACGG-1_1_1_1	control
GSM7949203	GSM7949203|B_cell	B_cell	GSE249513	CGGACTGAGTGGAGAA-1_1_1_1	control
GSM7949203	GSM7949203|B_cell	B_cell	GSE249513	CGGACTGCACATTCGA-1_1_1_1	control
GSM7949203	GSM7949203|B_cell	B_cell	GSE249513	CGGACTGCAGCCTATA-1_1_1_1	control
GSM7949203	GSM7949203|B_cell	B_cell	GSE249513	CGGACTGGTCCAACTA-1_1_1_1	control
GSM7949203	GSM7949203|B_cell	B_cell	GSE249513	CGGACTGTCCAAACAC-1_1_1_1	control
GSM7949203	GSM7949203|B_cell	B_cell	GSE249513	CGGACTGTCCGATATG-1_1_1_1	control
GSM7949203	GSM7949203|B_cell	B_cell	GSE249513	CGGACTGTCGGCGCAT-1_1_1_1	control
GSM7949203	GSM7949203|B_cell	B_cell	GSE249513	CGGACTGTCGTTTGCC-1_1_1_1	control
GSM7949203	GSM7949203|B_cell	B_cell	GSE249513	CGGACTGTCTGCTGCT-1_1_1_1	control
GSM7949203	GSM7949203|B_cell	B_cell	GSE249513	CGGAGCTAGCGTTTAC-1_1_1_1	control
GSM7949203	GSM7949203|B_cell	B_cell	GSE249513	CGGAGCTAGTGCCAGA-1_1_1_1	control
GSM7949203	GSM7949203|B_cell	B_cell	GSE249513	CGGAGCTAGTGGTAGC-1_1_1_1	control
GSM7949203	GSM7949203|B_cell	B_cell	GSE249513	CGGAGCTCAGCTTAAC-1_1_1_1	control
GSM7949203	GSM7949203|B_cell	B_cell	GSE249513	CGGAGCTCATCACCCT-1_1_1_1	control
GSM7949203	GSM7949203|B_cell	B_cell	GSE249513	CGGAGCTGTAATAGCA-1_1_1_1	control
GSM7949203	GSM7949203|B_cell	B_cell	GSE249513	CGGAGCTGTCAAACTC-1_1_1_1	control
GSM7949203	GSM7949203|B_cell	B_cell	GSE249513	CGGAGCTGTCAGAAGC-1_1_1_1	control
GSM7949203	GSM7949203|B_cell	B_cell	GSE249513	CGGAGCTGTCGCGGTT-1_1_1_1	control
GSM7949203	GSM7949203|B_cell	B_cell	GSE249513	CGGAGCTGTGTCCTCT-1_1_1_1	control
GSM7949203	GSM7949203|B_cell	B_cell	GSE249513	CGGAGCTTCACCGGGT-1_1_1_1	control
GSM7949203	GSM7949203|B_cell	B_cell	GSE249513	CGGAGCTTCACGCGGT-1_1_1_1	control
GSM7949203	GSM7949203|B_cell	B_cell	GSE249513	CGGAGCTTCGGGAGTA-1_1_1_1	control
GSM7949203	GSM7949203|B_cell	B_cell	GSE249513	CGGAGCTTCTGGCGAC-1_1_1_1	control
GSM7949203	GSM7949203|B_cell	B_cell	GSE249513	CGGAGTCAGACCTAGG-1_1_1_1	control
GSM7949203	GSM7949203|B_cell	B_cell	GSE249513	CGGAGTCAGAGCTATA-1_1_1_1	control
GSM7949203	GSM7949203|B_cell	B_cell	GSE249513	CGGAGTCAGCGATATA-1_1_1_1	control
GSM7949203	GSM7949203|B_cell	B_cell	GSE249513	CGGAGTCAGTGGCACA-1_1_1_1	control
GSM7949203	GSM7949203|B_cell	B_cell	GSE249513	CGGAGTCCAAGCCATT-1_1_1_1	control
GSM7949203	GSM7949203|B_cell	B_cell	GSE249513	CGGAGTCCACTACAGT-1_1_1_1	control
GSM7949203	GSM7949203|B_cell	B_cell	GSE249513	CGGAGTCCATTTGCCC-1_1_1_1	control
GSM7949203	GSM7949203|B_cell	B_cell	GSE249513	CGGAGTCTCGGTTAAC-1_1_1_1	control
GSM7949203	GSM7949203|B_cell	B_cell	GSE249513	CGGAGTCTCGTTTGCC-1_1_1_1	control
GSM7949203	GSM7949203|B_cell	B_cell	GSE249513	CGGCTAGAGCTAGTCT-1_1_1_1	control
GSM7949203	GSM7949203|B_cell	B_cell	GSE249513	CGGCTAGAGTCGTTTG-1_1_1_1	control
GSM7949203	GSM7949203|B_cell	B_cell	GSE249513	CGGCTAGAGTTCGCAT-1_1_1_1	control
GSM7949203	GSM7949203|B_cell	B_cell	GSE249513	CGGCTAGCACCAACCG-1_1_1_1	control
GSM7949203	GSM7949203|B_cell	B_cell	GSE249513	CGGCTAGCACTGAAGG-1_1_1_1	control
GSM7949203	GSM7949203|B_cell	B_cell	GSE249513	CGGCTAGGTAAGGGCT-1_1_1_1	control
GSM7949203	GSM7949203|B_cell	B_cell	GSE249513	CGGCTAGGTCAGAAGC-1_1_1_1	control
GSM7949203	GSM7949203|B_cell	B_cell	GSE249513	CGGCTAGGTCAGCTAT-1_1_1_1	control
GSM7949203	GSM7949203|B_cell	B_cell	GSE249513	CGGCTAGGTCGCATAT-1_1_1_1	control
GSM7949203	GSM7949203|B_cell	B_cell	GSE249513	CGGCTAGGTGTAACGG-1_1_1_1	control
GSM7949203	GSM7949203|B_cell	B_cell	GSE249513	CGGCTAGGTTGGTTTG-1_1_1_1	control
GSM7949203	GSM7949203|B_cell	B_cell	GSE249513	CGGCTAGTCCCTAACC-1_1_1_1	control
GSM7949203	GSM7949203|B_cell	B_cell	GSE249513	CGGCTAGTCCGTTGCT-1_1_1_1	control
GSM7949203	GSM7949203|B_cell	B_cell	GSE249513	CGGCTAGTCGGAGCAA-1_1_1_1	control
GSM7949203	GSM7949203|B_cell	B_cell	GSE249513	CGGCTAGTCGTTGCCT-1_1_1_1	control
GSM7949203	GSM7949203|B_cell	B_cell	GSE249513	CGGCTAGTCTGGAGCC-1_1_1_1	control
GSM7949203	GSM7949203|B_cell	B_cell	GSE249513	CGGGTCAAGAAACCAT-1_1_1_1	control
GSM7949203	GSM7949203|B_cell	B_cell	GSE249513	CGGGTCAAGGCTACGA-1_1_1_1	control
GSM7949203	GSM7949203|B_cell	B_cell	GSE249513	CGGGTCAAGTGCAAGC-1_1_1_1	control
GSM7949203	GSM7949203|B_cell	B_cell	GSE249513	CGGGTCACACACCGAC-1_1_1_1	control
GSM7949203	GSM7949203|B_cell	B_cell	GSE249513	CGGGTCACACGGTAAG-1_1_1_1	control
GSM7949203	GSM7949203|B_cell	B_cell	GSE249513	CGGGTCACACTGTCGG-1_1_1_1	control
GSM7949203	GSM7949203|B_cell	B_cell	GSE249513	CGGGTCACATAGGATA-1_1_1_1	control
GSM7949203	GSM7949203|B_cell	B_cell	GSE249513	CGGGTCAGTTTGCATG-1_1_1_1	control
GSM7949203	GSM7949203|B_cell	B_cell	GSE249513	CGGGTCATCCGCATCT-1_1_1_1	control
GSM7949203	GSM7949203|B_cell	B_cell	GSE249513	CGGGTCATCTCAAACG-1_1_1_1	control
GSM7949203	GSM7949203|B_cell	B_cell	GSE249513	CGGTTAAAGAAACCTA-1_1_1_1	control
GSM7949203	GSM7949203|B_cell	B_cell	GSE249513	CGGTTAAAGAATAGGG-1_1_1_1	control
GSM7949203	GSM7949203|B_cell	B_cell	GSE249513	CGGTTAAAGCTTATCG-1_1_1_1	control
GSM7949203	GSM7949203|B_cell	B_cell	GSE249513	CGGTTAACACCGATAT-1_1_1_1	control
GSM7949203	GSM7949203|B_cell	B_cell	GSE249513	CGGTTAACAGGGTATG-1_1_1_1	control
GSM7949203	GSM7949203|B_cell	B_cell	GSE249513	CGGTTAACAGGTCCAC-1_1_1_1	control
GSM7949203	GSM7949203|B_cell	B_cell	GSE249513	CGGTTAACATGACGGA-1_1_1_1	control
GSM7949203	GSM7949203|B_cell	B_cell	GSE249513	CGGTTAACATTTCACT-1_1_1_1	control
GSM7949203	GSM7949203|B_cell	B_cell	GSE249513	CGGTTAAGTACAGCAG-1_1_1_1	control
GSM7949203	GSM7949203|B_cell	B_cell	GSE249513	CGGTTAAGTACCGTTA-1_1_1_1	control
GSM7949203	GSM7949203|B_cell	B_cell	GSE249513	CGGTTAAGTAGCGCAA-1_1_1_1	control
GSM7949203	GSM7949203|B_cell	B_cell	GSE249513	CGGTTAAGTAGCGTCC-1_1_1_1	control
GSM7949203	GSM7949203|B_cell	B_cell	GSE249513	CGGTTAAGTCCGAAGA-1_1_1_1	control
GSM7949203	GSM7949203|B_cell	B_cell	GSE249513	CGGTTAAGTCGCTTCT-1_1_1_1	control
GSM7949203	GSM7949203|B_cell	B_cell	GSE249513	CGGTTAAGTGGCGAAT-1_1_1_1	control
GSM7949203	GSM7949203|B_cell	B_cell	GSE249513	CGGTTAATCAGGATCT-1_1_1_1	control
GSM7949203	GSM7949203|B_cell	B_cell	GSE249513	CGGTTAATCCATTCTA-1_1_1_1	control
GSM7949203	GSM7949203|B_cell	B_cell	GSE249513	CGGTTAATCTCATTCA-1_1_1_1	control
GSM7949203	GSM7949203|B_cell	B_cell	GSE249513	CGTAGCGAGAATGTTG-1_1_1_1	control
GSM7949203	GSM7949203|B_cell	B_cell	GSE249513	CGTAGCGAGATATGGT-1_1_1_1	control
GSM7949203	GSM7949203|B_cell	B_cell	GSE249513	CGTAGCGAGCACGCCT-1_1_1_1	control
GSM7949203	GSM7949203|B_cell	B_cell	GSE249513	CGTAGCGAGCGACGTA-1_1_1_1	control
GSM7949203	GSM7949203|B_cell	B_cell	GSE249513	CGTAGCGAGCGCCTTG-1_1_1_1	control
GSM7949203	GSM7949203|B_cell	B_cell	GSE249513	CGTAGCGCAATGAATG-1_1_1_1	control
GSM7949203	GSM7949203|B_cell	B_cell	GSE249513	CGTAGCGCAGCATGAG-1_1_1_1	control
GSM7949203	GSM7949203|B_cell	B_cell	GSE249513	CGTAGCGCAGGAACGT-1_1_1_1	control
GSM7949203	GSM7949203|B_cell	B_cell	GSE249513	CGTAGCGCATCATCCC-1_1_1_1	control
GSM7949203	GSM7949203|B_cell	B_cell	GSE249513	CGTAGCGCATTTCAGG-1_1_1_1	control
GSM7949203	GSM7949203|B_cell	B_cell	GSE249513	CGTAGCGGTCTGCGGT-1_1_1_1	control
GSM7949203	GSM7949203|B_cell	B_cell	GSE249513	CGTAGCGTCACAATGC-1_1_1_1	control
GSM7949203	GSM7949203|B_cell	B_cell	GSE249513	CGTAGGCAGACTGGGT-1_1_1_1	control
GSM7949203	GSM7949203|B_cell	B_cell	GSE249513	CGTAGGCAGCGGATCA-1_1_1_1	control
GSM7949203	GSM7949203|B_cell	B_cell	GSE249513	CGTAGGCAGCTCAACT-1_1_1_1	control
GSM7949203	GSM7949203|B_cell	B_cell	GSE249513	CGTAGGCAGTCCCACG-1_1_1_1	control
GSM7949203	GSM7949203|B_cell	B_cell	GSE249513	CGTAGGCCACGACTCG-1_1_1_1	control
GSM7949203	GSM7949203|B_cell	B_cell	GSE249513	CGTAGGCCAGACACTT-1_1_1_1	control
GSM7949203	GSM7949203|B_cell	B_cell	GSE249513	CGTAGGCCAGCAGTTT-1_1_1_1	control
GSM7949203	GSM7949203|B_cell	B_cell	GSE249513	CGTAGGCCAGCTCCGA-1_1_1_1	control
GSM7949203	GSM7949203|B_cell	B_cell	GSE249513	CGTAGGCCAGTATAAG-1_1_1_1	control
GSM7949203	GSM7949203|B_cell	B_cell	GSE249513	CGTAGGCCATGGTAGG-1_1_1_1	control
GSM7949203	GSM7949203|B_cell	B_cell	GSE249513	CGTAGGCGTATGCTTG-1_1_1_1	control
GSM7949203	GSM7949203|B_cell	B_cell	GSE249513	CGTAGGCTCACATGCA-1_1_1_1	control
GSM7949203	GSM7949203|B_cell	B_cell	GSE249513	CGTAGGCTCCAGGGCT-1_1_1_1	control
GSM7949203	GSM7949203|B_cell	B_cell	GSE249513	CGTAGGCTCCGCGCAA-1_1_1_1	control
GSM7949203	GSM7949203|B_cell	B_cell	GSE249513	CGTAGGCTCGAGAACG-1_1_1_1	control
GSM7949203	GSM7949203|B_cell	B_cell	GSE249513	CGTAGGCTCGGCTACG-1_1_1_1	control
GSM7949203	GSM7949203|B_cell	B_cell	GSE249513	CGTAGGCTCGTTACAG-1_1_1_1	control
GSM7949203	GSM7949203|B_cell	B_cell	GSE249513	CGTCACTAGAGTCTGG-1_1_1_1	control
GSM7949203	GSM7949203|B_cell	B_cell	GSE249513	CGTCACTAGATGTTAG-1_1_1_1	control
GSM7949203	GSM7949203|B_cell	B_cell	GSE249513	CGTCACTCAGCTCCGA-1_1_1_1	control
GSM7949203	GSM7949203|B_cell	B_cell	GSE249513	CGTCACTCATATGCTG-1_1_1_1	control
GSM7949203	GSM7949203|B_cell	B_cell	GSE249513	CGTCACTGTAAGTTCC-1_1_1_1	control
GSM7949203	GSM7949203|B_cell	B_cell	GSE249513	CGTCACTGTATTAGCC-1_1_1_1	control
GSM7949203	GSM7949203|B_cell	B_cell	GSE249513	CGTCACTGTCTGATTG-1_1_1_1	control
GSM7949203	GSM7949203|B_cell	B_cell	GSE249513	CGTCACTGTGCACTTA-1_1_1_1	control
GSM7949203	GSM7949203|B_cell	B_cell	GSE249513	CGTCACTGTTAAAGAC-1_1_1_1	control
GSM7949203	GSM7949203|B_cell	B_cell	GSE249513	CGTCACTGTTCCACTC-1_1_1_1	control
GSM7949203	GSM7949203|B_cell	B_cell	GSE249513	CGTCACTTCACAATGC-1_1_1_1	control
GSM7949203	GSM7949203|B_cell	B_cell	GSE249513	CGTCACTTCTCGCTTG-1_1_1_1	control
GSM7949203	GSM7949203|B_cell	B_cell	GSE249513	CGTCACTTCTGGCGAC-1_1_1_1	control
GSM7949203	GSM7949203|B_cell	B_cell	GSE249513	CGTCAGGAGCTAGTGG-1_1_1_1	control
GSM7949203	GSM7949203|B_cell	B_cell	GSE249513	CGTCAGGAGGAGTTGC-1_1_1_1	control
GSM7949203	GSM7949203|B_cell	B_cell	GSE249513	CGTCAGGCAAGCCCAC-1_1_1_1	control
GSM7949203	GSM7949203|B_cell	B_cell	GSE249513	CGTCAGGCAATACGCT-1_1_1_1	control
GSM7949203	GSM7949203|B_cell	B_cell	GSE249513	CGTCAGGTCATCGGAT-1_1_1_1	control
GSM7949203	GSM7949203|B_cell	B_cell	GSE249513	CGTCCATCAGCTCCGA-1_1_1_1	control
GSM7949203	GSM7949203|B_cell	B_cell	GSE249513	CGTCCATCATTCACTT-1_1_1_1	control
GSM7949203	GSM7949203|B_cell	B_cell	GSE249513	CGTCCATGTAACGCGA-1_1_1_1	control
GSM7949203	GSM7949203|B_cell	B_cell	GSE249513	CGTCCATTCAGCATGT-1_1_1_1	control
GSM7949203	GSM7949203|B_cell	B_cell	GSE249513	CGTCCATTCCGCAGTG-1_1_1_1	control
GSM7949203	GSM7949203|B_cell	B_cell	GSE249513	CGTCCATTCCGCGGTA-1_1_1_1	control
GSM7949203	GSM7949203|B_cell	B_cell	GSE249513	CGTCTACCACTTAAGC-1_1_1_1	control
GSM7949203	GSM7949203|B_cell	B_cell	GSE249513	CGTCTACCATCTCGCT-1_1_1_1	control
GSM7949203	GSM7949203|B_cell	B_cell	GSE249513	CGTCTACCATGTTCCC-1_1_1_1	control
GSM7949203	GSM7949203|B_cell	B_cell	GSE249513	CGTCTACCATTCACTT-1_1_1_1	control
GSM7949203	GSM7949203|B_cell	B_cell	GSE249513	CGTCTACGTACATGTC-1_1_1_1	control
GSM7949203	GSM7949203|B_cell	B_cell	GSE249513	CGTCTACGTTGGAGGT-1_1_1_1	control
GSM7949203	GSM7949203|B_cell	B_cell	GSE249513	CGTCTACTCACTCCTG-1_1_1_1	control
GSM7949203	GSM7949203|B_cell	B_cell	GSE249513	CGTCTACTCAGCAACT-1_1_1_1	control
GSM7949203	GSM7949203|B_cell	B_cell	GSE249513	CGTCTACTCCGTTGCT-1_1_1_1	control
GSM7949203	GSM7949203|B_cell	B_cell	GSE249513	CGTCTACTCCTTGACC-1_1_1_1	control
GSM7949203	GSM7949203|B_cell	B_cell	GSE249513	CGTCTACTCGCGTAGC-1_1_1_1	control
GSM7949203	GSM7949203|B_cell	B_cell	GSE249513	CGTCTACTCGCTGATA-1_1_1_1	control
GSM7949203	GSM7949203|B_cell	B_cell	GSE249513	CGTGAGCAGACTCGGA-1_1_1_1	control
GSM7949203	GSM7949203|B_cell	B_cell	GSE249513	CGTGAGCAGATGGCGT-1_1_1_1	control
GSM7949203	GSM7949203|B_cell	B_cell	GSE249513	CGTGAGCAGCGTGAAC-1_1_1_1	control
GSM7949203	GSM7949203|B_cell	B_cell	GSE249513	CGTGAGCAGGACTGGT-1_1_1_1	control
GSM7949203	GSM7949203|B_cell	B_cell	GSE249513	CGTGAGCAGGCACATG-1_1_1_1	control
GSM7949203	GSM7949203|B_cell	B_cell	GSE249513	CGTGAGCAGTACGTAA-1_1_1_1	control
GSM7949203	GSM7949203|B_cell	B_cell	GSE249513	CGTGAGCCAACACCCG-1_1_1_1	control
GSM7949203	GSM7949203|B_cell	B_cell	GSE249513	CGTGAGCGTCTCCCTA-1_1_1_1	control
GSM7949203	GSM7949203|B_cell	B_cell	GSE249513	CGTGTAAAGCTAGGCA-1_1_1_1	control
GSM7949203	GSM7949203|B_cell	B_cell	GSE249513	CGTGTAACAAGTACCT-1_1_1_1	control
GSM7949203	GSM7949203|B_cell	B_cell	GSE249513	CGTGTAACACCTTGTC-1_1_1_1	control
GSM7949203	GSM7949203|B_cell	B_cell	GSE249513	CGTGTAACATGGTAGG-1_1_1_1	control
GSM7949203	GSM7949203|B_cell	B_cell	GSE249513	CGTGTAAGTTCCGTCT-1_1_1_1	control
GSM7949203	GSM7949203|B_cell	B_cell	GSE249513	CGTGTAATCTGCTGTC-1_1_1_1	control
GSM7949203	GSM7949203|B_cell	B_cell	GSE249513	CGTGTCTAGAAGGTTT-1_1_1_1	control
GSM7949203	GSM7949203|B_cell	B_cell	GSE249513	CGTGTCTAGCCAGGAT-1_1_1_1	control
GSM7949203	GSM7949203|B_cell	B_cell	GSE249513	CGTGTCTAGGTGTGGT-1_1_1_1	control
GSM7949203	GSM7949203|B_cell	B_cell	GSE249513	CGTGTCTAGTCATGCT-1_1_1_1	control
GSM7949203	GSM7949203|B_cell	B_cell	GSE249513	CGTGTCTCACATCCGG-1_1_1_1	control
GSM7949203	GSM7949203|B_cell	B_cell	GSE249513	CGTGTCTCAGGCGATA-1_1_1_1	control
GSM7949203	GSM7949203|B_cell	B_cell	GSE249513	CGTGTCTCATACTACG-1_1_1_1	control
GSM7949203	GSM7949203|B_cell	B_cell	GSE249513	CGTGTCTGTAGGCATG-1_1_1_1	control
GSM7949203	GSM7949203|B_cell	B_cell	GSE249513	CGTGTCTGTTACTGAC-1_1_1_1	control
GSM7949203	GSM7949203|B_cell	B_cell	GSE249513	CGTGTCTGTTCGTCTC-1_1_1_1	control
GSM7949203	GSM7949203|B_cell	B_cell	GSE249513	CGTGTCTTCAACCATG-1_1_1_1	control
GSM7949203	GSM7949203|B_cell	B_cell	GSE249513	CGTGTCTTCCGCGCAA-1_1_1_1	control
GSM7949203	GSM7949203|B_cell	B_cell	GSE249513	CGTTAGAAGACAGAGA-1_1_1_1	control
GSM7949203	GSM7949203|B_cell	B_cell	GSE249513	CGTTAGAAGCCTCGTG-1_1_1_1	control
GSM7949203	GSM7949203|B_cell	B_cell	GSE249513	CGTTAGACAACTGCTA-1_1_1_1	control
GSM7949203	GSM7949203|B_cell	B_cell	GSE249513	CGTTAGACAAGTCATC-1_1_1_1	control
GSM7949203	GSM7949203|B_cell	B_cell	GSE249513	CGTTAGACAAGTCTAC-1_1_1_1	control
GSM7949203	GSM7949203|B_cell	B_cell	GSE249513	CGTTAGACAGTGACAG-1_1_1_1	control
GSM7949203	GSM7949203|B_cell	B_cell	GSE249513	CGTTAGACAGTTCATG-1_1_1_1	control
GSM7949203	GSM7949203|B_cell	B_cell	GSE249513	CGTTAGACATGCCTAA-1_1_1_1	control
GSM7949203	GSM7949203|B_cell	B_cell	GSE249513	CGTTAGAGTGCAGGTA-1_1_1_1	control
GSM7949203	GSM7949203|B_cell	B_cell	GSE249513	CGTTAGATCTAACTTC-1_1_1_1	control
GSM7949203	GSM7949203|B_cell	B_cell	GSE249513	CGTTCTGAGCTCCTCT-1_1_1_1	control
GSM7949203	GSM7949203|B_cell	B_cell	GSE249513	CGTTCTGCAAAGGAAG-1_1_1_1	control
GSM7949203	GSM7949203|B_cell	B_cell	GSE249513	CGTTCTGCACAGATTC-1_1_1_1	control
GSM7949203	GSM7949203|B_cell	B_cell	GSE249513	CGTTCTGCACATCTTT-1_1_1_1	control
GSM7949203	GSM7949203|B_cell	B_cell	GSE249513	CGTTCTGCAGGCAGTA-1_1_1_1	control
GSM7949203	GSM7949203|B_cell	B_cell	GSE249513	CGTTCTGCATATACGC-1_1_1_1	control
GSM7949203	GSM7949203|B_cell	B_cell	GSE249513	CGTTCTGGTAAGAGAG-1_1_1_1	control
GSM7949203	GSM7949203|B_cell	B_cell	GSE249513	CGTTCTGGTGAGCGAT-1_1_1_1	control
GSM7949203	GSM7949203|B_cell	B_cell	GSE249513	CGTTCTGTCAGAGACG-1_1_1_1	control
GSM7949203	GSM7949203|B_cell	B_cell	GSE249513	CGTTCTGTCAGGTTCA-1_1_1_1	control
GSM7949203	GSM7949203|B_cell	B_cell	GSE249513	CGTTCTGTCTCCGGTT-1_1_1_1	control
GSM7949203	GSM7949203|B_cell	B_cell	GSE249513	CGTTCTGTCTGCGACG-1_1_1_1	control
GSM7949203	GSM7949203|B_cell	B_cell	GSE249513	CGTTGGGAGATGCCTT-1_1_1_1	control
GSM7949203	GSM7949203|B_cell	B_cell	GSE249513	CGTTGGGAGCCAGAAC-1_1_1_1	control
GSM7949203	GSM7949203|B_cell	B_cell	GSE249513	CGTTGGGAGGTAGCCA-1_1_1_1	control
GSM7949203	GSM7949203|B_cell	B_cell	GSE249513	CGTTGGGAGTGTTGAA-1_1_1_1	control
GSM7949203	GSM7949203|B_cell	B_cell	GSE249513	CGTTGGGCATATGAGA-1_1_1_1	control
GSM7949203	GSM7949203|B_cell	B_cell	GSE249513	CGTTGGGCATGCAATC-1_1_1_1	control
GSM7949203	GSM7949203|B_cell	B_cell	GSE249513	CGTTGGGGTACCAGTT-1_1_1_1	control
GSM7949203	GSM7949203|B_cell	B_cell	GSE249513	CGTTGGGGTTCGAATC-1_1_1_1	control
GSM7949203	GSM7949203|B_cell	B_cell	GSE249513	CTAACTTAGTAATCCC-1_1_1_1	control
GSM7949203	GSM7949203|B_cell	B_cell	GSE249513	CTAACTTAGTCCATAC-1_1_1_1	control
GSM7949203	GSM7949203|B_cell	B_cell	GSE249513	CTAACTTAGTCGCCGT-1_1_1_1	control
GSM7949203	GSM7949203|B_cell	B_cell	GSE249513	CTAACTTCAAGTTAAG-1_1_1_1	control
GSM7949203	GSM7949203|B_cell	B_cell	GSE249513	CTAACTTCAGATCCAT-1_1_1_1	control
GSM7949203	GSM7949203|B_cell	B_cell	GSE249513	CTAACTTCATTATCTC-1_1_1_1	control
GSM7949203	GSM7949203|B_cell	B_cell	GSE249513	CTAACTTGTATAGGGC-1_1_1_1	control
GSM7949203	GSM7949203|B_cell	B_cell	GSE249513	CTAACTTGTCAAAGAT-1_1_1_1	control
GSM7949203	GSM7949203|B_cell	B_cell	GSE249513	CTAACTTGTCCTGCTT-1_1_1_1	control
GSM7949203	GSM7949203|B_cell	B_cell	GSE249513	CTAACTTGTCGGCTCA-1_1_1_1	control
GSM7949203	GSM7949203|B_cell	B_cell	GSE249513	CTAACTTGTTACCGAT-1_1_1_1	control
GSM7949203	GSM7949203|B_cell	B_cell	GSE249513	CTAACTTGTTACGACT-1_1_1_1	control
GSM7949203	GSM7949203|B_cell	B_cell	GSE249513	CTAACTTTCATGCTCC-1_1_1_1	control
GSM7949203	GSM7949203|B_cell	B_cell	GSE249513	CTAAGACGTAACGCGA-1_1_1_1	control
GSM7949203	GSM7949203|B_cell	B_cell	GSE249513	CTAAGACGTCTGATTG-1_1_1_1	control
GSM7949203	GSM7949203|B_cell	B_cell	GSE249513	CTAAGACGTGAGGCTA-1_1_1_1	control
GSM7949203	GSM7949203|B_cell	B_cell	GSE249513	CTAAGACGTTCAGTAC-1_1_1_1	control
GSM7949203	GSM7949203|B_cell	B_cell	GSE249513	CTAATGGAGAAGGTGA-1_1_1_1	control
GSM7949203	GSM7949203|B_cell	B_cell	GSE249513	CTAATGGAGTAGCCGA-1_1_1_1	control
GSM7949203	GSM7949203|B_cell	B_cell	GSE249513	CTAATGGAGTGGCACA-1_1_1_1	control
GSM7949203	GSM7949203|B_cell	B_cell	GSE249513	CTAATGGCAGCGATCC-1_1_1_1	control
GSM7949203	GSM7949203|B_cell	B_cell	GSE249513	CTACACCAGAGTAAGG-1_1_1_1	control
GSM7949203	GSM7949203|B_cell	B_cell	GSE249513	CTACACCAGGAGTCTG-1_1_1_1	control
GSM7949203	GSM7949203|B_cell	B_cell	GSE249513	CTACACCAGTCGATAA-1_1_1_1	control
GSM7949203	GSM7949203|B_cell	B_cell	GSE249513	CTACACCAGTGTTGAA-1_1_1_1	control
GSM7949203	GSM7949203|B_cell	B_cell	GSE249513	CTACACCCAGACAGGT-1_1_1_1	control
GSM7949203	GSM7949203|B_cell	B_cell	GSE249513	CTACACCCAGGCTGAA-1_1_1_1	control
GSM7949203	GSM7949203|B_cell	B_cell	GSE249513	CTACACCGTCGGATCC-1_1_1_1	control
GSM7949203	GSM7949203|B_cell	B_cell	GSE249513	CTACACCTCCGCAAGC-1_1_1_1	control
GSM7949203	GSM7949203|B_cell	B_cell	GSE249513	CTACACCTCGTTTGCC-1_1_1_1	control
GSM7949203	GSM7949203|B_cell	B_cell	GSE249513	CTACACCTCTCTGAGA-1_1_1_1	control
GSM7949203	GSM7949203|B_cell	B_cell	GSE249513	CTACACCTCTCTTATG-1_1_1_1	control
GSM7949203	GSM7949203|B_cell	B_cell	GSE249513	CTACATTGTAGCGTGA-1_1_1_1	control
GSM7949203	GSM7949203|B_cell	B_cell	GSE249513	CTACATTGTCGCATAT-1_1_1_1	control
GSM7949203	GSM7949203|B_cell	B_cell	GSE249513	CTACATTGTCTGGAGA-1_1_1_1	control
GSM7949203	GSM7949203|B_cell	B_cell	GSE249513	CTACATTGTGTCTGAT-1_1_1_1	control
GSM7949203	GSM7949203|B_cell	B_cell	GSE249513	CTACATTGTTGAGTTC-1_1_1_1	control
GSM7949203	GSM7949203|B_cell	B_cell	GSE249513	CTACATTTCAACACTG-1_1_1_1	control
GSM7949203	GSM7949203|B_cell	B_cell	GSE249513	CTACATTTCCCTCTTT-1_1_1_1	control
GSM7949203	GSM7949203|B_cell	B_cell	GSE249513	CTACATTTCTGCAGTA-1_1_1_1	control
GSM7949203	GSM7949203|B_cell	B_cell	GSE249513	CTACCCAAGCAATATG-1_1_1_1	control
GSM7949203	GSM7949203|B_cell	B_cell	GSE249513	CTACCCAAGCCACGTC-1_1_1_1	control
GSM7949203	GSM7949203|B_cell	B_cell	GSE249513	CTACCCAAGGATGCGT-1_1_1_1	control
GSM7949203	GSM7949203|B_cell	B_cell	GSE249513	CTACCCAAGGGTCTCC-1_1_1_1	control
GSM7949203	GSM7949203|B_cell	B_cell	GSE249513	CTACCCACAAGTTAAG-1_1_1_1	control
GSM7949203	GSM7949203|B_cell	B_cell	GSE249513	CTACCCACATGAAGTA-1_1_1_1	control
GSM7949203	GSM7949203|B_cell	B_cell	GSE249513	CTACCCAGTCAATGTC-1_1_1_1	control
GSM7949203	GSM7949203|B_cell	B_cell	GSE249513	CTACCCAGTCGATTGT-1_1_1_1	control
GSM7949203	GSM7949203|B_cell	B_cell	GSE249513	CTACCCATCAAGAAGT-1_1_1_1	control
GSM7949203	GSM7949203|B_cell	B_cell	GSE249513	CTACGTCAGGCTCTTA-1_1_1_1	control
GSM7949203	GSM7949203|B_cell	B_cell	GSE249513	CTACGTCAGTTGCAGG-1_1_1_1	control
GSM7949203	GSM7949203|B_cell	B_cell	GSE249513	CTACGTCCACAGGCCT-1_1_1_1	control
GSM7949203	GSM7949203|B_cell	B_cell	GSE249513	CTACGTCCACGAAATA-1_1_1_1	control
GSM7949203	GSM7949203|B_cell	B_cell	GSE249513	CTACGTCCATCAGTCA-1_1_1_1	control
GSM7949203	GSM7949203|B_cell	B_cell	GSE249513	CTACGTCGTTAAGATG-1_1_1_1	control
GSM7949203	GSM7949203|B_cell	B_cell	GSE249513	CTACGTCGTTTCCACC-1_1_1_1	control
GSM7949203	GSM7949203|B_cell	B_cell	GSE249513	CTACGTCTCAACGGCC-1_1_1_1	control
GSM7949203	GSM7949203|B_cell	B_cell	GSE249513	CTACGTCTCGAACTGT-1_1_1_1	control
GSM7949203	GSM7949203|B_cell	B_cell	GSE249513	CTAGAGTAGCTGTCTA-1_1_1_1	control
GSM7949203	GSM7949203|B_cell	B_cell	GSE249513	CTAGAGTAGGCCCGTT-1_1_1_1	control
GSM7949203	GSM7949203|B_cell	B_cell	GSE249513	CTAGAGTAGGTGTGGT-1_1_1_1	control
GSM7949203	GSM7949203|B_cell	B_cell	GSE249513	CTAGAGTCACGGCTAC-1_1_1_1	control
GSM7949203	GSM7949203|B_cell	B_cell	GSE249513	CTAGAGTCAGCCTTTC-1_1_1_1	control
GSM7949203	GSM7949203|B_cell	B_cell	GSE249513	CTAGAGTCATATGAGA-1_1_1_1	control
GSM7949203	GSM7949203|B_cell	B_cell	GSE249513	CTAGAGTGTAGCGATG-1_1_1_1	control
GSM7949203	GSM7949203|B_cell	B_cell	GSE249513	CTAGAGTGTCCGTCAG-1_1_1_1	control
GSM7949203	GSM7949203|B_cell	B_cell	GSE249513	CTAGAGTGTCTGATCA-1_1_1_1	control
GSM7949203	GSM7949203|B_cell	B_cell	GSE249513	CTAGAGTGTGCGCTTG-1_1_1_1	control
GSM7949203	GSM7949203|B_cell	B_cell	GSE249513	CTAGAGTTCACGGTTA-1_1_1_1	control
GSM7949203	GSM7949203|B_cell	B_cell	GSE249513	CTAGCCTAGTCCGTAT-1_1_1_1	control
GSM7949203	GSM7949203|B_cell	B_cell	GSE249513	CTAGCCTCACACATGT-1_1_1_1	control
GSM7949203	GSM7949203|B_cell	B_cell	GSE249513	CTAGCCTGTCGACTGC-1_1_1_1	control
GSM7949203	GSM7949203|B_cell	B_cell	GSE249513	CTAGCCTGTGAGGCTA-1_1_1_1	control
GSM7949203	GSM7949203|B_cell	B_cell	GSE249513	CTAGCCTTCAATAAGG-1_1_1_1	control
GSM7949203	GSM7949203|B_cell	B_cell	GSE249513	CTAGCCTTCGTCCGTT-1_1_1_1	control
GSM7949203	GSM7949203|B_cell	B_cell	GSE249513	CTAGCCTTCTACCTGC-1_1_1_1	control
GSM7949203	GSM7949203|B_cell	B_cell	GSE249513	CTAGTGAAGCAGCCTC-1_1_1_1	control
GSM7949203	GSM7949203|B_cell	B_cell	GSE249513	CTAGTGAAGGCATGGT-1_1_1_1	control
GSM7949203	GSM7949203|B_cell	B_cell	GSE249513	CTAGTGAAGTCAAGGC-1_1_1_1	control
GSM7949203	GSM7949203|B_cell	B_cell	GSE249513	CTAGTGAAGTGCTGCC-1_1_1_1	control
GSM7949203	GSM7949203|B_cell	B_cell	GSE249513	CTAGTGACAACTGCTA-1_1_1_1	control
GSM7949203	GSM7949203|B_cell	B_cell	GSE249513	CTAGTGACACAGCGTC-1_1_1_1	control
GSM7949203	GSM7949203|B_cell	B_cell	GSE249513	CTAGTGAGTACCGTTA-1_1_1_1	control
GSM7949203	GSM7949203|B_cell	B_cell	GSE249513	CTAGTGATCACCAGGC-1_1_1_1	control
GSM7949203	GSM7949203|B_cell	B_cell	GSE249513	CTAGTGATCCTTTACA-1_1_1_1	control
GSM7949203	GSM7949203|B_cell	B_cell	GSE249513	CTCACACAGTACGATA-1_1_1_1	control
GSM7949203	GSM7949203|B_cell	B_cell	GSE249513	CTCACACAGTGTACCT-1_1_1_1	control
GSM7949203	GSM7949203|B_cell	B_cell	GSE249513	CTCACACCATCACAAC-1_1_1_1	control
GSM7949203	GSM7949203|B_cell	B_cell	GSE249513	CTCACACCATGATCCA-1_1_1_1	control
GSM7949203	GSM7949203|B_cell	B_cell	GSE249513	CTCACACCATGTAGTC-1_1_1_1	control
GSM7949203	GSM7949203|B_cell	B_cell	GSE249513	CTCACACGTGTTTGTG-1_1_1_1	control
GSM7949203	GSM7949203|B_cell	B_cell	GSE249513	CTCACACGTTACGGAG-1_1_1_1	control
GSM7949203	GSM7949203|B_cell	B_cell	GSE249513	CTCACACGTTATCCGA-1_1_1_1	control
GSM7949203	GSM7949203|B_cell	B_cell	GSE249513	CTCACACTCGTGGGAA-1_1_1_1	control
GSM7949203	GSM7949203|B_cell	B_cell	GSE249513	CTCAGAAAGAATAGGG-1_1_1_1	control
GSM7949203	GSM7949203|B_cell	B_cell	GSE249513	CTCAGAAAGGCTAGAC-1_1_1_1	control
GSM7949203	GSM7949203|B_cell	B_cell	GSE249513	CTCAGAAAGTTCGCAT-1_1_1_1	control
GSM7949203	GSM7949203|B_cell	B_cell	GSE249513	CTCAGAACAGGGATTG-1_1_1_1	control
GSM7949203	GSM7949203|B_cell	B_cell	GSE249513	CTCAGAACATAAAGGT-1_1_1_1	control
GSM7949203	GSM7949203|B_cell	B_cell	GSE249513	CTCAGAAGTATTCGTG-1_1_1_1	control
GSM7949203	GSM7949203|B_cell	B_cell	GSE249513	CTCAGAAGTCTACCTC-1_1_1_1	control
GSM7949203	GSM7949203|B_cell	B_cell	GSE249513	CTCAGAATCGGCGCAT-1_1_1_1	control
GSM7949203	GSM7949203|B_cell	B_cell	GSE249513	CTCATTAAGATCGATA-1_1_1_1	control
GSM7949203	GSM7949203|B_cell	B_cell	GSE249513	CTCATTAAGGACCACA-1_1_1_1	control
GSM7949203	GSM7949203|B_cell	B_cell	GSE249513	CTCATTACACATCCAA-1_1_1_1	control
GSM7949203	GSM7949203|B_cell	B_cell	GSE249513	CTCATTACAGGGTTAG-1_1_1_1	control
GSM7949203	GSM7949203|B_cell	B_cell	GSE249513	CTCATTAGTACAGTGG-1_1_1_1	control
GSM7949203	GSM7949203|B_cell	B_cell	GSE249513	CTCATTAGTACCTACA-1_1_1_1	control
GSM7949203	GSM7949203|B_cell	B_cell	GSE249513	CTCATTAGTGCAACGA-1_1_1_1	control
GSM7949203	GSM7949203|B_cell	B_cell	GSE249513	CTCATTAGTTTGACTG-1_1_1_1	control
GSM7949203	GSM7949203|B_cell	B_cell	GSE249513	CTCATTATCAAAGTAG-1_1_1_1	control
GSM7949203	GSM7949203|B_cell	B_cell	GSE249513	CTCATTATCAAGCCTA-1_1_1_1	control
GSM7949203	GSM7949203|B_cell	B_cell	GSE249513	CTCATTATCGTGACAT-1_1_1_1	control
GSM7949203	GSM7949203|B_cell	B_cell	GSE249513	CTCCTAGAGGCAATTA-1_1_1_1	control
GSM7949203	GSM7949203|B_cell	B_cell	GSE249513	CTCCTAGCATTTCACT-1_1_1_1	control
GSM7949203	GSM7949203|B_cell	B_cell	GSE249513	CTCCTAGGTGACGCCT-1_1_1_1	control
GSM7949203	GSM7949203|B_cell	B_cell	GSE249513	CTCCTAGGTGGCTCCA-1_1_1_1	control
GSM7949203	GSM7949203|B_cell	B_cell	GSE249513	CTCCTAGTCAACACCA-1_1_1_1	control
GSM7949203	GSM7949203|B_cell	B_cell	GSE249513	CTCCTAGTCGGCCGAT-1_1_1_1	control
GSM7949203	GSM7949203|B_cell	B_cell	GSE249513	CTCGAAAAGACAAAGG-1_1_1_1	control
GSM7949203	GSM7949203|B_cell	B_cell	GSE249513	CTCGAAAAGGCGACAT-1_1_1_1	control
GSM7949203	GSM7949203|B_cell	B_cell	GSE249513	CTCGAAAAGTCTCGGC-1_1_1_1	control
GSM7949203	GSM7949203|B_cell	B_cell	GSE249513	CTCGAAACACATGACT-1_1_1_1	control
GSM7949203	GSM7949203|B_cell	B_cell	GSE249513	CTCGAAACACCTCGTT-1_1_1_1	control
GSM7949203	GSM7949203|B_cell	B_cell	GSE249513	CTCGAAAGTGCGAAAC-1_1_1_1	control
GSM7949203	GSM7949203|B_cell	B_cell	GSE249513	CTCGAAATCAGTTGAC-1_1_1_1	control
GSM7949203	GSM7949203|B_cell	B_cell	GSE249513	CTCGAAATCATATCGG-1_1_1_1	control
GSM7949203	GSM7949203|B_cell	B_cell	GSE249513	CTCGAAATCGGCGGTT-1_1_1_1	control
GSM7949203	GSM7949203|B_cell	B_cell	GSE249513	CTCGAGGAGACGACGT-1_1_1_1	control
GSM7949203	GSM7949203|B_cell	B_cell	GSE249513	CTCGAGGAGGGTCTCC-1_1_1_1	control
GSM7949203	GSM7949203|B_cell	B_cell	GSE249513	CTCGAGGAGGTACTCT-1_1_1_1	control
GSM7949203	GSM7949203|B_cell	B_cell	GSE249513	CTCGAGGCAATAGAGT-1_1_1_1	control
GSM7949203	GSM7949203|B_cell	B_cell	GSE249513	CTCGAGGGTAATCACC-1_1_1_1	control
GSM7949203	GSM7949203|B_cell	B_cell	GSE249513	CTCGAGGGTAGCTGCC-1_1_1_1	control
GSM7949203	GSM7949203|B_cell	B_cell	GSE249513	CTCGAGGGTCTGCAAT-1_1_1_1	control
GSM7949203	GSM7949203|B_cell	B_cell	GSE249513	CTCGAGGTCAGTTCGA-1_1_1_1	control
GSM7949203	GSM7949203|B_cell	B_cell	GSE249513	CTCGAGGTCATCGGAT-1_1_1_1	control
GSM7949203	GSM7949203|B_cell	B_cell	GSE249513	CTCGAGGTCATGGTCA-1_1_1_1	control
GSM7949203	GSM7949203|B_cell	B_cell	GSE249513	CTCGAGGTCTGACCTC-1_1_1_1	control
GSM7949203	GSM7949203|B_cell	B_cell	GSE249513	CTCGGAGTCTCTAAGG-1_1_1_1	control
GSM7949203	GSM7949203|B_cell	B_cell	GSE249513	CTCGGGAAGACCTAGG-1_1_1_1	control
GSM7949203	GSM7949203|B_cell	B_cell	GSE249513	CTCGGGAAGCCACGTC-1_1_1_1	control
GSM7949203	GSM7949203|B_cell	B_cell	GSE249513	CTCGGGACAGTCCTTC-1_1_1_1	control
GSM7949203	GSM7949203|B_cell	B_cell	GSE249513	CTCGGGAGTCAAACTC-1_1_1_1	control
GSM7949203	GSM7949203|B_cell	B_cell	GSE249513	CTCGGGAGTTAGAACA-1_1_1_1	control
GSM7949203	GSM7949203|B_cell	B_cell	GSE249513	CTCGGGATCAAACGGG-1_1_1_1	control
GSM7949203	GSM7949203|B_cell	B_cell	GSE249513	CTCGGGATCACCTTAT-1_1_1_1	control
GSM7949203	GSM7949203|B_cell	B_cell	GSE249513	CTCGGGATCCAGAGGA-1_1_1_1	control
GSM7949203	GSM7949203|B_cell	B_cell	GSE249513	CTCGGGATCGCCAGCA-1_1_1_1	control
GSM7949203	GSM7949203|B_cell	B_cell	GSE249513	CTCGGGATCGCGGATC-1_1_1_1	control
GSM7949203	GSM7949203|B_cell	B_cell	GSE249513	CTCGGGATCGTCTGCT-1_1_1_1	control
GSM7949203	GSM7949203|B_cell	B_cell	GSE249513	CTCGGGATCTGCGTAA-1_1_1_1	control
GSM7949203	GSM7949203|B_cell	B_cell	GSE249513	CTCGTACAGATCGATA-1_1_1_1	control
GSM7949203	GSM7949203|B_cell	B_cell	GSE249513	CTCGTACAGCCACGCT-1_1_1_1	control
GSM7949203	GSM7949203|B_cell	B_cell	GSE249513	CTCGTACAGGAGCGAG-1_1_1_1	control
GSM7949203	GSM7949203|B_cell	B_cell	GSE249513	CTCGTACAGTGGGTTG-1_1_1_1	control
GSM7949203	GSM7949203|B_cell	B_cell	GSE249513	CTCGTACCACCACCAG-1_1_1_1	control
GSM7949203	GSM7949203|B_cell	B_cell	GSE249513	CTCGTACCACGCATCG-1_1_1_1	control
GSM7949203	GSM7949203|B_cell	B_cell	GSE249513	CTCGTACGTAAAGTCA-1_1_1_1	control
GSM7949203	GSM7949203|B_cell	B_cell	GSE249513	CTCGTACGTAAGTAGT-1_1_1_1	control
GSM7949203	GSM7949203|B_cell	B_cell	GSE249513	CTCGTACGTCCGCTGA-1_1_1_1	control
GSM7949203	GSM7949203|B_cell	B_cell	GSE249513	CTCGTACGTTCAACCA-1_1_1_1	control
GSM7949203	GSM7949203|B_cell	B_cell	GSE249513	CTCGTACTCACAGTAC-1_1_1_1	control
GSM7949203	GSM7949203|B_cell	B_cell	GSE249513	CTCGTACTCCGCATAA-1_1_1_1	control
GSM7949203	GSM7949203|B_cell	B_cell	GSE249513	CTCGTACTCGTCCGTT-1_1_1_1	control
GSM7949203	GSM7949203|B_cell	B_cell	GSE249513	CTCGTACTCTGCCAGG-1_1_1_1	control
GSM7949203	GSM7949203|B_cell	B_cell	GSE249513	CTCGTCAAGAGGTTAT-1_1_1_1	control
GSM7949203	GSM7949203|B_cell	B_cell	GSE249513	CTCGTCAAGCGACGTA-1_1_1_1	control
GSM7949203	GSM7949203|B_cell	B_cell	GSE249513	CTCGTCAAGGCACATG-1_1_1_1	control
GSM7949203	GSM7949203|B_cell	B_cell	GSE249513	CTCGTCAAGGCTATCT-1_1_1_1	control
GSM7949203	GSM7949203|B_cell	B_cell	GSE249513	CTCGTCACAAAGTGCG-1_1_1_1	control
GSM7949203	GSM7949203|B_cell	B_cell	GSE249513	CTCGTCAGTCCCTTGT-1_1_1_1	control
GSM7949203	GSM7949203|B_cell	B_cell	GSE249513	CTCGTCAGTGACGCCT-1_1_1_1	control
GSM7949203	GSM7949203|B_cell	B_cell	GSE249513	CTCGTCAGTGGTGTAG-1_1_1_1	control
GSM7949203	GSM7949203|B_cell	B_cell	GSE249513	CTCGTCATCCTGTACC-1_1_1_1	control
GSM7949203	GSM7949203|B_cell	B_cell	GSE249513	CTCGTCATCGTTTGCC-1_1_1_1	control
GSM7949203	GSM7949203|B_cell	B_cell	GSE249513	CTCGTCATCTAAGCCA-1_1_1_1	control
GSM7949203	GSM7949203|B_cell	B_cell	GSE249513	CTCTAATAGCCACGCT-1_1_1_1	control
GSM7949203	GSM7949203|B_cell	B_cell	GSE249513	CTCTAATAGCGTTTAC-1_1_1_1	control
GSM7949203	GSM7949203|B_cell	B_cell	GSE249513	CTCTAATAGGAGTCTG-1_1_1_1	control
GSM7949203	GSM7949203|B_cell	B_cell	GSE249513	CTCTAATAGTTACGGG-1_1_1_1	control
GSM7949203	GSM7949203|B_cell	B_cell	GSE249513	CTCTAATCAGACAGGT-1_1_1_1	control
GSM7949203	GSM7949203|B_cell	B_cell	GSE249513	CTCTAATCAGTGGAGT-1_1_1_1	control
GSM7949203	GSM7949203|B_cell	B_cell	GSE249513	CTCTAATGTATCACCA-1_1_1_1	control
GSM7949203	GSM7949203|B_cell	B_cell	GSE249513	CTCTAATGTGCGATAG-1_1_1_1	control
GSM7949203	GSM7949203|B_cell	B_cell	GSE249513	CTCTAATGTTGTCGCG-1_1_1_1	control
GSM7949203	GSM7949203|B_cell	B_cell	GSE249513	CTCTAATTCAACACGT-1_1_1_1	control
GSM7949203	GSM7949203|B_cell	B_cell	GSE249513	CTCTAATTCCAAACAC-1_1_1_1	control
GSM7949203	GSM7949203|B_cell	B_cell	GSE249513	CTCTAATTCGCGGATC-1_1_1_1	control
GSM7949203	GSM7949203|B_cell	B_cell	GSE249513	CTCTACGAGAATCTCC-1_1_1_1	control
GSM7949203	GSM7949203|B_cell	B_cell	GSE249513	CTCTACGAGGAGCGTT-1_1_1_1	control
GSM7949203	GSM7949203|B_cell	B_cell	GSE249513	CTCTACGAGTGGGCTA-1_1_1_1	control
GSM7949203	GSM7949203|B_cell	B_cell	GSE249513	CTCTACGCAAAGCGGT-1_1_1_1	control
GSM7949203	GSM7949203|B_cell	B_cell	GSE249513	CTCTACGCAATGTTGC-1_1_1_1	control
GSM7949203	GSM7949203|B_cell	B_cell	GSE249513	CTCTACGCACTTAAGC-1_1_1_1	control
GSM7949203	GSM7949203|B_cell	B_cell	GSE249513	CTCTACGGTAAAGGAG-1_1_1_1	control
GSM7949203	GSM7949203|B_cell	B_cell	GSE249513	CTCTACGGTTAAGATG-1_1_1_1	control
GSM7949203	GSM7949203|B_cell	B_cell	GSE249513	CTCTACGTCACTGGGC-1_1_1_1	control
GSM7949203	GSM7949203|B_cell	B_cell	GSE249513	CTCTGGTAGCGTCTAT-1_1_1_1	control
GSM7949203	GSM7949203|B_cell	B_cell	GSE249513	CTCTGGTCAAAGCAAT-1_1_1_1	control
GSM7949203	GSM7949203|B_cell	B_cell	GSE249513	CTCTGGTCATGCCCGA-1_1_1_1	control
GSM7949203	GSM7949203|B_cell	B_cell	GSE249513	CTCTGGTCATTAACCG-1_1_1_1	control
GSM7949203	GSM7949203|B_cell	B_cell	GSE249513	CTCTGGTGTATAATGG-1_1_1_1	control
GSM7949203	GSM7949203|B_cell	B_cell	GSE249513	CTCTGGTGTATTAGCC-1_1_1_1	control
GSM7949203	GSM7949203|B_cell	B_cell	GSE249513	CTCTGGTGTGACGGTA-1_1_1_1	control
GSM7949203	GSM7949203|B_cell	B_cell	GSE249513	CTCTGGTGTTCTGAAC-1_1_1_1	control
GSM7949203	GSM7949203|B_cell	B_cell	GSE249513	CTCTGGTTCCTCAATT-1_1_1_1	control
GSM7949203	GSM7949203|B_cell	B_cell	GSE249513	CTGAAACAGAAGGACA-1_1_1_1	control
GSM7949203	GSM7949203|B_cell	B_cell	GSE249513	CTGAAACAGCGTTCCG-1_1_1_1	control
GSM7949203	GSM7949203|B_cell	B_cell	GSE249513	CTGAAACAGGCGCTCT-1_1_1_1	control
GSM7949203	GSM7949203|B_cell	B_cell	GSE249513	CTGAAACAGTGAACGC-1_1_1_1	control
GSM7949203	GSM7949203|B_cell	B_cell	GSE249513	CTGAAACCAGGTCTCG-1_1_1_1	control
GSM7949203	GSM7949203|B_cell	B_cell	GSE249513	CTGAAACCATATGCTG-1_1_1_1	control
GSM7949203	GSM7949203|B_cell	B_cell	GSE249513	CTGAAACCATGTAAGA-1_1_1_1	control
GSM7949203	GSM7949203|B_cell	B_cell	GSE249513	CTGAAACGTCTGATTG-1_1_1_1	control
GSM7949203	GSM7949203|B_cell	B_cell	GSE249513	CTGAAACGTGTGAAAT-1_1_1_1	control
GSM7949203	GSM7949203|B_cell	B_cell	GSE249513	CTGAAGTAGACTCGGA-1_1_1_1	control
GSM7949203	GSM7949203|B_cell	B_cell	GSE249513	CTGAAGTAGCGTCTAT-1_1_1_1	control
GSM7949203	GSM7949203|B_cell	B_cell	GSE249513	CTGAAGTAGGTGTTAA-1_1_1_1	control
GSM7949203	GSM7949203|B_cell	B_cell	GSE249513	CTGAAGTAGTGGGATC-1_1_1_1	control
GSM7949203	GSM7949203|B_cell	B_cell	GSE249513	CTGAAGTCACATGGGA-1_1_1_1	control
GSM7949203	GSM7949203|B_cell	B_cell	GSE249513	CTGAAGTGTAAGGATT-1_1_1_1	control
GSM7949203	GSM7949203|B_cell	B_cell	GSE249513	CTGAAGTGTACCGTAT-1_1_1_1	control
GSM7949203	GSM7949203|B_cell	B_cell	GSE249513	CTGAAGTGTCGCTTCT-1_1_1_1	control
GSM7949203	GSM7949203|B_cell	B_cell	GSE249513	CTGAAGTGTGCAACTT-1_1_1_1	control
GSM7949203	GSM7949203|B_cell	B_cell	GSE249513	CTGAAGTTCCTGCCAT-1_1_1_1	control
GSM7949203	GSM7949203|B_cell	B_cell	GSE249513	CTGAAGTTCGGTTCGG-1_1_1_1	control
GSM7949203	GSM7949203|B_cell	B_cell	GSE249513	CTGATAGAGAACTCGG-1_1_1_1	control
GSM7949203	GSM7949203|B_cell	B_cell	GSE249513	CTGATAGAGAATTGTG-1_1_1_1	control
GSM7949203	GSM7949203|B_cell	B_cell	GSE249513	CTGATAGAGATCCGAG-1_1_1_1	control
GSM7949203	GSM7949203|B_cell	B_cell	GSE249513	CTGATAGAGCCCAATT-1_1_1_1	control
GSM7949203	GSM7949203|B_cell	B_cell	GSE249513	CTGATAGAGGCCGAAT-1_1_1_1	control
GSM7949203	GSM7949203|B_cell	B_cell	GSE249513	CTGATAGGTAGCGCTC-1_1_1_1	control
GSM7949203	GSM7949203|B_cell	B_cell	GSE249513	CTGATAGGTCGAAAGC-1_1_1_1	control
GSM7949203	GSM7949203|B_cell	B_cell	GSE249513	CTGATAGGTGAGGGAG-1_1_1_1	control
GSM7949203	GSM7949203|B_cell	B_cell	GSE249513	CTGATAGTCAACACTG-1_1_1_1	control
GSM7949203	GSM7949203|B_cell	B_cell	GSE249513	CTGATAGTCTACCAGA-1_1_1_1	control
GSM7949203	GSM7949203|B_cell	B_cell	GSE249513	CTGATCCAGAGGGCTT-1_1_1_1	control
GSM7949203	GSM7949203|B_cell	B_cell	GSE249513	CTGATCCCACGGCCAT-1_1_1_1	control
GSM7949203	GSM7949203|B_cell	B_cell	GSE249513	CTGATCCCAGCTCGCA-1_1_1_1	control
GSM7949203	GSM7949203|B_cell	B_cell	GSE249513	CTGATCCGTAGCGTCC-1_1_1_1	control
GSM7949203	GSM7949203|B_cell	B_cell	GSE249513	CTGATCCGTGGTTTCA-1_1_1_1	control
GSM7949203	GSM7949203|B_cell	B_cell	GSE249513	CTGATCCGTTGGTAAA-1_1_1_1	control
GSM7949203	GSM7949203|B_cell	B_cell	GSE249513	CTGATCCTCCCGACTT-1_1_1_1	control
GSM7949203	GSM7949203|B_cell	B_cell	GSE249513	CTGATCCTCGGAAACG-1_1_1_1	control
GSM7949203	GSM7949203|B_cell	B_cell	GSE249513	CTGATCCTCGGCCGAT-1_1_1_1	control
GSM7949203	GSM7949203|B_cell	B_cell	GSE249513	CTGATCCTCTTACCGC-1_1_1_1	control
GSM7949203	GSM7949203|B_cell	B_cell	GSE249513	CTGCCTAAGAGACTTA-1_1_1_1	control
GSM7949203	GSM7949203|B_cell	B_cell	GSE249513	CTGCCTAAGAGTCGGT-1_1_1_1	control
GSM7949203	GSM7949203|B_cell	B_cell	GSE249513	CTGCCTAAGATCGATA-1_1_1_1	control
GSM7949203	GSM7949203|B_cell	B_cell	GSE249513	CTGCCTAAGGGAGTAA-1_1_1_1	control
GSM7949203	GSM7949203|B_cell	B_cell	GSE249513	CTGCCTAAGTACGCGA-1_1_1_1	control
GSM7949203	GSM7949203|B_cell	B_cell	GSE249513	CTGCCTACACCCATTC-1_1_1_1	control
GSM7949203	GSM7949203|B_cell	B_cell	GSE249513	CTGCCTACACGCTTTC-1_1_1_1	control
GSM7949203	GSM7949203|B_cell	B_cell	GSE249513	CTGCCTACATTACCTT-1_1_1_1	control
GSM7949203	GSM7949203|B_cell	B_cell	GSE249513	CTGCCTAGTTCCCGAG-1_1_1_1	control
GSM7949203	GSM7949203|B_cell	B_cell	GSE249513	CTGCCTATCGGATGTT-1_1_1_1	control
GSM7949203	GSM7949203|B_cell	B_cell	GSE249513	CTGCCTATCTATGTGG-1_1_1_1	control
GSM7949203	GSM7949203|B_cell	B_cell	GSE249513	CTGCGGAAGCTAACTC-1_1_1_1	control
GSM7949203	GSM7949203|B_cell	B_cell	GSE249513	CTGCGGAAGTACGCCC-1_1_1_1	control
GSM7949203	GSM7949203|B_cell	B_cell	GSE249513	CTGCGGACAGGGTACA-1_1_1_1	control
GSM7949203	GSM7949203|B_cell	B_cell	GSE249513	CTGCGGAGTATAGGGC-1_1_1_1	control
GSM7949203	GSM7949203|B_cell	B_cell	GSE249513	CTGCGGAGTGATGCCC-1_1_1_1	control
GSM7949203	GSM7949203|B_cell	B_cell	GSE249513	CTGCGGATCACCGTAA-1_1_1_1	control
GSM7949203	GSM7949203|B_cell	B_cell	GSE249513	CTGCGGATCCAGTAGT-1_1_1_1	control
GSM7949203	GSM7949203|B_cell	B_cell	GSE249513	CTGCGGATCTGCTGTC-1_1_1_1	control
GSM7949203	GSM7949203|B_cell	B_cell	GSE249513	CTGCTGTAGCTAGTCT-1_1_1_1	control
GSM7949203	GSM7949203|B_cell	B_cell	GSE249513	CTGCTGTAGGTGTTAA-1_1_1_1	control
GSM7949203	GSM7949203|B_cell	B_cell	GSE249513	CTGCTGTAGTGGACGT-1_1_1_1	control
GSM7949203	GSM7949203|B_cell	B_cell	GSE249513	CTGCTGTCAAGCTGGA-1_1_1_1	control
GSM7949203	GSM7949203|B_cell	B_cell	GSE249513	CTGCTGTCATTGGTAC-1_1_1_1	control
GSM7949203	GSM7949203|B_cell	B_cell	GSE249513	CTGCTGTGTAAAGTCA-1_1_1_1	control
GSM7949203	GSM7949203|B_cell	B_cell	GSE249513	CTGCTGTGTCGCGGTT-1_1_1_1	control
GSM7949203	GSM7949203|B_cell	B_cell	GSE249513	CTGCTGTGTGCAGTAG-1_1_1_1	control
GSM7949203	GSM7949203|B_cell	B_cell	GSE249513	CTGCTGTGTGGACGAT-1_1_1_1	control
GSM7949203	GSM7949203|B_cell	B_cell	GSE249513	CTGCTGTTCAGTTCGA-1_1_1_1	control
GSM7949203	GSM7949203|B_cell	B_cell	GSE249513	CTGCTGTTCGGTGTTA-1_1_1_1	control
GSM7949203	GSM7949203|B_cell	B_cell	GSE249513	CTGCTGTTCTCGCTTG-1_1_1_1	control
GSM7949203	GSM7949203|B_cell	B_cell	GSE249513	CTGGTCTCATAAGACA-1_1_1_1	control
GSM7949203	GSM7949203|B_cell	B_cell	GSE249513	CTGGTCTCATTACGAC-1_1_1_1	control
GSM7949203	GSM7949203|B_cell	B_cell	GSE249513	CTGGTCTGTAGCGCTC-1_1_1_1	control
GSM7949203	GSM7949203|B_cell	B_cell	GSE249513	CTGGTCTGTGATGTCT-1_1_1_1	control
GSM7949203	GSM7949203|B_cell	B_cell	GSE249513	CTGGTCTGTTCTGTTT-1_1_1_1	control
GSM7949203	GSM7949203|B_cell	B_cell	GSE249513	CTGGTCTTCCTAGGGC-1_1_1_1	control
GSM7949203	GSM7949203|B_cell	B_cell	GSE249513	CTGTGCTAGGGTATCG-1_1_1_1	control
GSM7949203	GSM7949203|B_cell	B_cell	GSE249513	CTGTGCTCAATAGAGT-1_1_1_1	control
GSM7949203	GSM7949203|B_cell	B_cell	GSE249513	CTGTGCTCACTGAAGG-1_1_1_1	control
GSM7949203	GSM7949203|B_cell	B_cell	GSE249513	CTGTGCTGTAAGGATT-1_1_1_1	control
GSM7949203	GSM7949203|B_cell	B_cell	GSE249513	CTGTGCTGTTGGGACA-1_1_1_1	control
GSM7949203	GSM7949203|B_cell	B_cell	GSE249513	CTGTGCTTCACAACGT-1_1_1_1	control
GSM7949203	GSM7949203|B_cell	B_cell	GSE249513	CTGTGCTTCAGGTAAA-1_1_1_1	control
GSM7949203	GSM7949203|B_cell	B_cell	GSE249513	CTGTGCTTCTCCAACC-1_1_1_1	control
GSM7949203	GSM7949203|B_cell	B_cell	GSE249513	CTGTGCTTCTGGTGTA-1_1_1_1	control
GSM7949203	GSM7949203|B_cell	B_cell	GSE249513	CTGTTTACAGCCAGAA-1_1_1_1	control
GSM7949203	GSM7949203|B_cell	B_cell	GSE249513	CTGTTTACAGCCTGTG-1_1_1_1	control
GSM7949203	GSM7949203|B_cell	B_cell	GSE249513	CTGTTTACATGAAGTA-1_1_1_1	control
GSM7949203	GSM7949203|B_cell	B_cell	GSE249513	CTGTTTAGTGCCTTGG-1_1_1_1	control
GSM7949203	GSM7949203|B_cell	B_cell	GSE249513	CTGTTTAGTGCGAAAC-1_1_1_1	control
GSM7949203	GSM7949203|B_cell	B_cell	GSE249513	CTGTTTATCATGTCTT-1_1_1_1	control
GSM7949203	GSM7949203|B_cell	B_cell	GSE249513	CTGTTTATCCAATGGT-1_1_1_1	control
GSM7949203	GSM7949203|B_cell	B_cell	GSE249513	CTGTTTATCGCAGGCT-1_1_1_1	control
GSM7949203	GSM7949203|B_cell	B_cell	GSE249513	CTGTTTATCGTAGGAG-1_1_1_1	control
GSM7949203	GSM7949203|B_cell	B_cell	GSE249513	CTTAACTAGAATTGTG-1_1_1_1	control
GSM7949203	GSM7949203|B_cell	B_cell	GSE249513	CTTAACTAGGAACTGC-1_1_1_1	control
GSM7949203	GSM7949203|B_cell	B_cell	GSE249513	CTTAACTGTACTTAGC-1_1_1_1	control
GSM7949203	GSM7949203|B_cell	B_cell	GSE249513	CTTAACTGTCCCTTGT-1_1_1_1	control
GSM7949203	GSM7949203|B_cell	B_cell	GSE249513	CTTAACTGTGCCTGGT-1_1_1_1	control
GSM7949203	GSM7949203|B_cell	B_cell	GSE249513	CTTAACTGTGCGATAG-1_1_1_1	control
GSM7949203	GSM7949203|B_cell	B_cell	GSE249513	CTTAACTTCGGATGGA-1_1_1_1	control
GSM7949203	GSM7949203|B_cell	B_cell	GSE249513	CTTAACTTCGTTACAG-1_1_1_1	control
GSM7949203	GSM7949203|B_cell	B_cell	GSE249513	CTTACCGAGAGGTACC-1_1_1_1	control
GSM7949203	GSM7949203|B_cell	B_cell	GSE249513	CTTACCGAGCACGCCT-1_1_1_1	control
GSM7949203	GSM7949203|B_cell	B_cell	GSE249513	CTTACCGAGCCCGAAA-1_1_1_1	control
GSM7949203	GSM7949203|B_cell	B_cell	GSE249513	CTTACCGAGCTAGTTC-1_1_1_1	control
GSM7949203	GSM7949203|B_cell	B_cell	GSE249513	CTTACCGAGGCTACGA-1_1_1_1	control
GSM7949203	GSM7949203|B_cell	B_cell	GSE249513	CTTACCGCAGTGAGTG-1_1_1_1	control
GSM7949203	GSM7949203|B_cell	B_cell	GSE249513	CTTACCGCATGCAATC-1_1_1_1	control
GSM7949203	GSM7949203|B_cell	B_cell	GSE249513	CTTACCGGTCGCATAT-1_1_1_1	control
GSM7949203	GSM7949203|B_cell	B_cell	GSE249513	CTTACCGGTCTGGTCG-1_1_1_1	control
GSM7949203	GSM7949203|B_cell	B_cell	GSE249513	CTTACCGTCCGTCAAA-1_1_1_1	control
GSM7949203	GSM7949203|B_cell	B_cell	GSE249513	CTTACCGTCCTATTCA-1_1_1_1	control
GSM7949203	GSM7949203|B_cell	B_cell	GSE249513	CTTAGGAAGACTAGAT-1_1_1_1	control
GSM7949203	GSM7949203|B_cell	B_cell	GSE249513	CTTAGGAAGCCATCGC-1_1_1_1	control
GSM7949203	GSM7949203|B_cell	B_cell	GSE249513	CTTAGGAAGTCCAGGA-1_1_1_1	control
GSM7949203	GSM7949203|B_cell	B_cell	GSE249513	CTTAGGACAGATGGCA-1_1_1_1	control
GSM7949203	GSM7949203|B_cell	B_cell	GSE249513	CTTAGGACAGGTCGTC-1_1_1_1	control
GSM7949203	GSM7949203|B_cell	B_cell	GSE249513	CTTAGGACATCACAAC-1_1_1_1	control
GSM7949203	GSM7949203|B_cell	B_cell	GSE249513	CTTAGGAGTCGCTTTC-1_1_1_1	control
GSM7949203	GSM7949203|B_cell	B_cell	GSE249513	CTTAGGATCACCTTAT-1_1_1_1	control
GSM7949203	GSM7949203|B_cell	B_cell	GSE249513	CTTAGGATCGAGGTAG-1_1_1_1	control
GSM7949203	GSM7949203|B_cell	B_cell	GSE249513	CTTCTCTAGAGTCGGT-1_1_1_1	control
GSM7949203	GSM7949203|B_cell	B_cell	GSE249513	CTTCTCTAGTACGCCC-1_1_1_1	control
GSM7949203	GSM7949203|B_cell	B_cell	GSE249513	CTTCTCTCAAAGAATC-1_1_1_1	control
GSM7949203	GSM7949203|B_cell	B_cell	GSE249513	CTTCTCTCACTTACGA-1_1_1_1	control
GSM7949203	GSM7949203|B_cell	B_cell	GSE249513	CTTCTCTCATTGCGGC-1_1_1_1	control
GSM7949203	GSM7949203|B_cell	B_cell	GSE249513	CTTCTCTTCCGTACAA-1_1_1_1	control
GSM7949203	GSM7949203|B_cell	B_cell	GSE249513	CTTCTCTTCGAACTGT-1_1_1_1	control
GSM7949203	GSM7949203|B_cell	B_cell	GSE249513	CTTCTCTTCTTACCTA-1_1_1_1	control
GSM7949203	GSM7949203|B_cell	B_cell	GSE249513	CTTGGCTAGAGTTGGC-1_1_1_1	control
GSM7949203	GSM7949203|B_cell	B_cell	GSE249513	CTTGGCTAGATCCTGT-1_1_1_1	control
GSM7949203	GSM7949203|B_cell	B_cell	GSE249513	CTTGGCTAGTGGAGTC-1_1_1_1	control
GSM7949203	GSM7949203|B_cell	B_cell	GSE249513	CTTGGCTCAGACAAAT-1_1_1_1	control
GSM7949203	GSM7949203|B_cell	B_cell	GSE249513	CTTGGCTGTAACGCGA-1_1_1_1	control
GSM7949203	GSM7949203|B_cell	B_cell	GSE249513	CTTGGCTGTATATGGA-1_1_1_1	control
GSM7949203	GSM7949203|B_cell	B_cell	GSE249513	CTTGGCTGTGGCGAAT-1_1_1_1	control
GSM7949203	GSM7949203|B_cell	B_cell	GSE249513	CTTGGCTGTTCAACCA-1_1_1_1	control
GSM7949203	GSM7949203|B_cell	B_cell	GSE249513	CTTGGCTGTTGCTCCT-1_1_1_1	control
GSM7949203	GSM7949203|B_cell	B_cell	GSE249513	CTTGGCTTCCTTTACA-1_1_1_1	control
GSM7949203	GSM7949203|B_cell	B_cell	GSE249513	CTTGGCTTCGTCACGG-1_1_1_1	control
GSM7949203	GSM7949203|B_cell	B_cell	GSE249513	CTTGGCTTCTTAACCT-1_1_1_1	control
GSM7949203	GSM7949203|B_cell	B_cell	GSE249513	CTTTGCGAGTGTCCAT-1_1_1_1	control
GSM7949203	GSM7949203|B_cell	B_cell	GSE249513	CTTTGCGCACGTCTCT-1_1_1_1	control
GSM7949203	GSM7949203|B_cell	B_cell	GSE249513	CTTTGCGGTCATGCCG-1_1_1_1	control
GSM7949203	GSM7949203|B_cell	B_cell	GSE249513	CTTTGCGGTGCGGTAA-1_1_1_1	control
GSM7949203	GSM7949203|B_cell	B_cell	GSE249513	CTTTGCGGTTATCCGA-1_1_1_1	control
GSM7949203	GSM7949203|B_cell	B_cell	GSE249513	CTTTGCGGTTCCACTC-1_1_1_1	control
GSM7949203	GSM7949203|B_cell	B_cell	GSE249513	GAAACTCAGCCCGAAA-1_1_1_1	control
GSM7949203	GSM7949203|B_cell	B_cell	GSE249513	GAAACTCAGGCTAGCA-1_1_1_1	control
GSM7949203	GSM7949203|B_cell	B_cell	GSE249513	GAAACTCAGTGCCAGA-1_1_1_1	control
GSM7949203	GSM7949203|B_cell	B_cell	GSE249513	GAAACTCAGTGTCCCG-1_1_1_1	control
GSM7949203	GSM7949203|B_cell	B_cell	GSE249513	GAAACTCCAGCTCGCA-1_1_1_1	control
GSM7949203	GSM7949203|B_cell	B_cell	GSE249513	GAAACTCCAGCTGGCT-1_1_1_1	control
GSM7949203	GSM7949203|B_cell	B_cell	GSE249513	GAAACTCCATCACGAT-1_1_1_1	control
GSM7949203	GSM7949203|B_cell	B_cell	GSE249513	GAAACTCGTCCGAACC-1_1_1_1	control
GSM7949203	GSM7949203|B_cell	B_cell	GSE249513	GAAACTCGTGCAGACA-1_1_1_1	control
GSM7949203	GSM7949203|B_cell	B_cell	GSE249513	GAAACTCGTTGATTGC-1_1_1_1	control
GSM7949203	GSM7949203|B_cell	B_cell	GSE249513	GAAACTCTCCGCGGTA-1_1_1_1	control
GSM7949203	GSM7949203|B_cell	B_cell	GSE249513	GAAATGAAGGGTCTCC-1_1_1_1	control
GSM7949203	GSM7949203|B_cell	B_cell	GSE249513	GAAATGAAGTACGATA-1_1_1_1	control
GSM7949203	GSM7949203|B_cell	B_cell	GSE249513	GAAATGAAGTGAATTG-1_1_1_1	control
GSM7949203	GSM7949203|B_cell	B_cell	GSE249513	GAAATGAGTCGTTGTA-1_1_1_1	control
GSM7949203	GSM7949203|B_cell	B_cell	GSE249513	GAAATGAGTGCTGTAT-1_1_1_1	control
GSM7949203	GSM7949203|B_cell	B_cell	GSE249513	GAAATGATCACTATTC-1_1_1_1	control
GSM7949203	GSM7949203|B_cell	B_cell	GSE249513	GAAATGATCCTTTCGG-1_1_1_1	control
GSM7949203	GSM7949203|B_cell	B_cell	GSE249513	GAAATGATCGTCCAGG-1_1_1_1	control
GSM7949203	GSM7949203|B_cell	B_cell	GSE249513	GAACATCAGAGTAAGG-1_1_1_1	control
GSM7949203	GSM7949203|B_cell	B_cell	GSE249513	GAACATCAGCGTAATA-1_1_1_1	control
GSM7949203	GSM7949203|B_cell	B_cell	GSE249513	GAACATCAGTCATCCA-1_1_1_1	control
GSM7949203	GSM7949203|B_cell	B_cell	GSE249513	GAACATCAGTCTTGCA-1_1_1_1	control
GSM7949203	GSM7949203|B_cell	B_cell	GSE249513	GAACATCCACAGAGGT-1_1_1_1	control
GSM7949203	GSM7949203|B_cell	B_cell	GSE249513	GAACATCCACCATCCT-1_1_1_1	control
GSM7949203	GSM7949203|B_cell	B_cell	GSE249513	GAACATCCAGGACCCT-1_1_1_1	control
GSM7949203	GSM7949203|B_cell	B_cell	GSE249513	GAACATCCATATACGC-1_1_1_1	control
GSM7949203	GSM7949203|B_cell	B_cell	GSE249513	GAACATCGTAGCGTCC-1_1_1_1	control
GSM7949203	GSM7949203|B_cell	B_cell	GSE249513	GAACATCGTCTGGAGA-1_1_1_1	control
GSM7949203	GSM7949203|B_cell	B_cell	GSE249513	GAACATCTCACTTCAT-1_1_1_1	control
GSM7949203	GSM7949203|B_cell	B_cell	GSE249513	GAACATCTCCGCGCAA-1_1_1_1	control
GSM7949203	GSM7949203|B_cell	B_cell	GSE249513	GAACCTAAGCGTAATA-1_1_1_1	control
GSM7949203	GSM7949203|B_cell	B_cell	GSE249513	GAACCTAAGCTAGTCT-1_1_1_1	control
GSM7949203	GSM7949203|B_cell	B_cell	GSE249513	GAACCTAAGTAGGCCA-1_1_1_1	control
GSM7949203	GSM7949203|B_cell	B_cell	GSE249513	GAACCTACACTAAGTC-1_1_1_1	control
GSM7949203	GSM7949203|B_cell	B_cell	GSE249513	GAACCTACAGGGTTAG-1_1_1_1	control
GSM7949203	GSM7949203|B_cell	B_cell	GSE249513	GAACCTAGTCCAGTAT-1_1_1_1	control
GSM7949203	GSM7949203|B_cell	B_cell	GSE249513	GAACCTAGTCTTGATG-1_1_1_1	control
GSM7949203	GSM7949203|B_cell	B_cell	GSE249513	GAACCTAGTGTATGGG-1_1_1_1	control
GSM7949203	GSM7949203|B_cell	B_cell	GSE249513	GAACGGAAGCGTTCCG-1_1_1_1	control
GSM7949203	GSM7949203|B_cell	B_cell	GSE249513	GAACGGAAGTCGTTTG-1_1_1_1	control
GSM7949203	GSM7949203|B_cell	B_cell	GSE249513	GAACGGAGTAAAGTCA-1_1_1_1	control
GSM7949203	GSM7949203|B_cell	B_cell	GSE249513	GAACGGAGTTGTTTGG-1_1_1_1	control
GSM7949203	GSM7949203|B_cell	B_cell	GSE249513	GAAGCAGCACGGTGTC-1_1_1_1	control
GSM7949203	GSM7949203|B_cell	B_cell	GSE249513	GAAGCAGCAGGGTATG-1_1_1_1	control
GSM7949203	GSM7949203|B_cell	B_cell	GSE249513	GAAGCAGCATAACCTG-1_1_1_1	control
GSM7949203	GSM7949203|B_cell	B_cell	GSE249513	GAAGCAGCATGACGGA-1_1_1_1	control
GSM7949203	GSM7949203|B_cell	B_cell	GSE249513	GAAGCAGGTACCGAGA-1_1_1_1	control
GSM7949203	GSM7949203|B_cell	B_cell	GSE249513	GAAGCAGGTCAATGTC-1_1_1_1	control
GSM7949203	GSM7949203|B_cell	B_cell	GSE249513	GAAGCAGGTCTCTCTG-1_1_1_1	control
GSM7949203	GSM7949203|B_cell	B_cell	GSE249513	GAAGCAGTCAACACAC-1_1_1_1	control
GSM7949203	GSM7949203|B_cell	B_cell	GSE249513	GAAGCAGTCTATCGCC-1_1_1_1	control
GSM7949203	GSM7949203|B_cell	B_cell	GSE249513	GAATAAGAGAAGGTGA-1_1_1_1	control
GSM7949203	GSM7949203|B_cell	B_cell	GSE249513	GAATAAGAGAATTGTG-1_1_1_1	control
GSM7949203	GSM7949203|B_cell	B_cell	GSE249513	GAATAAGAGCATCATC-1_1_1_1	control
GSM7949203	GSM7949203|B_cell	B_cell	GSE249513	GAATAAGAGCTGCAAG-1_1_1_1	control
GSM7949203	GSM7949203|B_cell	B_cell	GSE249513	GAATAAGAGGTAAACT-1_1_1_1	control
GSM7949203	GSM7949203|B_cell	B_cell	GSE249513	GAATAAGAGTTGTCGT-1_1_1_1	control
GSM7949203	GSM7949203|B_cell	B_cell	GSE249513	GAATAAGCAATGCCAT-1_1_1_1	control
GSM7949203	GSM7949203|B_cell	B_cell	GSE249513	GAATAAGCACAGGAGT-1_1_1_1	control
GSM7949203	GSM7949203|B_cell	B_cell	GSE249513	GAATAAGGTGCGGTAA-1_1_1_1	control
GSM7949203	GSM7949203|B_cell	B_cell	GSE249513	GAATAAGTCCAAGTAC-1_1_1_1	control
GSM7949203	GSM7949203|B_cell	B_cell	GSE249513	GAATAAGTCGGACAAG-1_1_1_1	control
GSM7949203	GSM7949203|B_cell	B_cell	GSE249513	GAATAAGTCGGCGGTT-1_1_1_1	control
GSM7949203	GSM7949203|B_cell	B_cell	GSE249513	GAATGAACACTCAGGC-1_1_1_1	control
GSM7949203	GSM7949203|B_cell	B_cell	GSE249513	GAATGAACATAGTAAG-1_1_1_1	control
GSM7949203	GSM7949203|B_cell	B_cell	GSE249513	GAATGAAGTGCACTTA-1_1_1_1	control
GSM7949203	GSM7949203|B_cell	B_cell	GSE249513	GAATGAAGTTATGTGC-1_1_1_1	control
GSM7949203	GSM7949203|B_cell	B_cell	GSE249513	GAATGAATCCTGTACC-1_1_1_1	control
GSM7949203	GSM7949203|B_cell	B_cell	GSE249513	GAATGAATCTAACGGT-1_1_1_1	control
GSM7949203	GSM7949203|B_cell	B_cell	GSE249513	GAATGAATCTGAAAGA-1_1_1_1	control
GSM7949203	GSM7949203|B_cell	B_cell	GSE249513	GAATGAATCTTTCCTC-1_1_1_1	control
GSM7949203	GSM7949203|B_cell	B_cell	GSE249513	GACACGCAGATCGATA-1_1_1_1	control
GSM7949203	GSM7949203|B_cell	B_cell	GSE249513	GACACGCAGTCGAGTG-1_1_1_1	control
GSM7949203	GSM7949203|B_cell	B_cell	GSE249513	GACACGCCACGGCGTT-1_1_1_1	control
GSM7949203	GSM7949203|B_cell	B_cell	GSE249513	GACACGCGTCTCCCTA-1_1_1_1	control
GSM7949203	GSM7949203|B_cell	B_cell	GSE249513	GACACGCGTTCCCTTG-1_1_1_1	control
GSM7949203	GSM7949203|B_cell	B_cell	GSE249513	GACACGCTCATCATTC-1_1_1_1	control
GSM7949203	GSM7949203|B_cell	B_cell	GSE249513	GACACGCTCCGAAGAG-1_1_1_1	control
GSM7949203	GSM7949203|B_cell	B_cell	GSE249513	GACACGCTCCGTCAAA-1_1_1_1	control
GSM7949203	GSM7949203|B_cell	B_cell	GSE249513	GACACGCTCGGTCCGA-1_1_1_1	control
GSM7949203	GSM7949203|B_cell	B_cell	GSE249513	GACACGCTCTAAGCCA-1_1_1_1	control
GSM7949203	GSM7949203|B_cell	B_cell	GSE249513	GACAGAGAGGCTCATT-1_1_1_1	control
GSM7949203	GSM7949203|B_cell	B_cell	GSE249513	GACAGAGCAGATGGCA-1_1_1_1	control
GSM7949203	GSM7949203|B_cell	B_cell	GSE249513	GACAGAGCATCGGACC-1_1_1_1	control
GSM7949203	GSM7949203|B_cell	B_cell	GSE249513	GACAGAGCATGGGAAC-1_1_1_1	control
GSM7949203	GSM7949203|B_cell	B_cell	GSE249513	GACAGAGCATGTAGTC-1_1_1_1	control
GSM7949203	GSM7949203|B_cell	B_cell	GSE249513	GACAGAGGTTGGTGGA-1_1_1_1	control
GSM7949203	GSM7949203|B_cell	B_cell	GSE249513	GACAGAGTCCACTGGG-1_1_1_1	control
GSM7949203	GSM7949203|B_cell	B_cell	GSE249513	GACCAATAGGCATTGG-1_1_1_1	control
GSM7949203	GSM7949203|B_cell	B_cell	GSE249513	GACCAATAGGCTCAGA-1_1_1_1	control
GSM7949203	GSM7949203|B_cell	B_cell	GSE249513	GACCAATCAGTGGGAT-1_1_1_1	control
GSM7949203	GSM7949203|B_cell	B_cell	GSE249513	GACCAATGTTCCCGAG-1_1_1_1	control
GSM7949203	GSM7949203|B_cell	B_cell	GSE249513	GACCAATGTTGGACCC-1_1_1_1	control
GSM7949203	GSM7949203|B_cell	B_cell	GSE249513	GACCTGGAGAAACCGC-1_1_1_1	control
GSM7949203	GSM7949203|B_cell	B_cell	GSE249513	GACCTGGAGATACACA-1_1_1_1	control
GSM7949203	GSM7949203|B_cell	B_cell	GSE249513	GACCTGGAGTACGTAA-1_1_1_1	control
GSM7949203	GSM7949203|B_cell	B_cell	GSE249513	GACCTGGAGTGGACGT-1_1_1_1	control
GSM7949203	GSM7949203|B_cell	B_cell	GSE249513	GACCTGGAGTGTACCT-1_1_1_1	control
GSM7949203	GSM7949203|B_cell	B_cell	GSE249513	GACCTGGGTATAATGG-1_1_1_1	control
GSM7949203	GSM7949203|B_cell	B_cell	GSE249513	GACCTGGTCATTCACT-1_1_1_1	control
GSM7949203	GSM7949203|B_cell	B_cell	GSE249513	GACCTGGTCGAACGGA-1_1_1_1	control
GSM7949203	GSM7949203|B_cell	B_cell	GSE249513	GACGCGTAGATTACCC-1_1_1_1	control
GSM7949203	GSM7949203|B_cell	B_cell	GSE249513	GACGCGTAGCTACCTA-1_1_1_1	control
GSM7949203	GSM7949203|B_cell	B_cell	GSE249513	GACGCGTAGGTTACCT-1_1_1_1	control
GSM7949203	GSM7949203|B_cell	B_cell	GSE249513	GACGCGTCATGGTAGG-1_1_1_1	control
GSM7949203	GSM7949203|B_cell	B_cell	GSE249513	GACGCGTGTCACTTCC-1_1_1_1	control
GSM7949203	GSM7949203|B_cell	B_cell	GSE249513	GACGCGTTCAACACCA-1_1_1_1	control
GSM7949203	GSM7949203|B_cell	B_cell	GSE249513	GACGCGTTCAACGGGA-1_1_1_1	control
GSM7949203	GSM7949203|B_cell	B_cell	GSE249513	GACGCGTTCTCCCTGA-1_1_1_1	control
GSM7949203	GSM7949203|B_cell	B_cell	GSE249513	GACGCGTTCTCGTATT-1_1_1_1	control
GSM7949203	GSM7949203|B_cell	B_cell	GSE249513	GACGCGTTCTGGTATG-1_1_1_1	control
GSM7949203	GSM7949203|B_cell	B_cell	GSE249513	GACGGCTAGATCCTGT-1_1_1_1	control
GSM7949203	GSM7949203|B_cell	B_cell	GSE249513	GACGGCTCAACCGCCA-1_1_1_1	control
GSM7949203	GSM7949203|B_cell	B_cell	GSE249513	GACGGCTCACAGCGTC-1_1_1_1	control
GSM7949203	GSM7949203|B_cell	B_cell	GSE249513	GACGGCTCACCGAATT-1_1_1_1	control
GSM7949203	GSM7949203|B_cell	B_cell	GSE249513	GACGGCTCACTCTGTC-1_1_1_1	control
GSM7949203	GSM7949203|B_cell	B_cell	GSE249513	GACGGCTGTACGAAAT-1_1_1_1	control
GSM7949203	GSM7949203|B_cell	B_cell	GSE249513	GACGGCTGTAGAGTGC-1_1_1_1	control
GSM7949203	GSM7949203|B_cell	B_cell	GSE249513	GACGGCTGTCACTTCC-1_1_1_1	control
GSM7949203	GSM7949203|B_cell	B_cell	GSE249513	GACGGCTGTCCTCTTG-1_1_1_1	control
GSM7949203	GSM7949203|B_cell	B_cell	GSE249513	GACGGCTTCCAGAAGG-1_1_1_1	control
GSM7949203	GSM7949203|B_cell	B_cell	GSE249513	GACGGCTTCTCGTATT-1_1_1_1	control
GSM7949203	GSM7949203|B_cell	B_cell	GSE249513	GACGTGCAGCGACGTA-1_1_1_1	control
GSM7949203	GSM7949203|B_cell	B_cell	GSE249513	GACGTGCAGGTGATAT-1_1_1_1	control
GSM7949203	GSM7949203|B_cell	B_cell	GSE249513	GACGTGCCAAGCTGGA-1_1_1_1	control
GSM7949203	GSM7949203|B_cell	B_cell	GSE249513	GACGTGCCACTAGTAC-1_1_1_1	control
GSM7949203	GSM7949203|B_cell	B_cell	GSE249513	GACGTGCCATGCATGT-1_1_1_1	control
GSM7949203	GSM7949203|B_cell	B_cell	GSE249513	GACGTGCGTAGCGTGA-1_1_1_1	control
GSM7949203	GSM7949203|B_cell	B_cell	GSE249513	GACGTGCGTCGCATAT-1_1_1_1	control
GSM7949203	GSM7949203|B_cell	B_cell	GSE249513	GACGTGCTCATGTAGC-1_1_1_1	control
GSM7949203	GSM7949203|B_cell	B_cell	GSE249513	GACGTGCTCCGAACGC-1_1_1_1	control
GSM7949203	GSM7949203|B_cell	B_cell	GSE249513	GACGTGCTCCGCGGTA-1_1_1_1	control
GSM7949203	GSM7949203|B_cell	B_cell	GSE249513	GACGTGCTCTGTTTGT-1_1_1_1	control
GSM7949203	GSM7949203|B_cell	B_cell	GSE249513	GACGTTAAGACCACGA-1_1_1_1	control
GSM7949203	GSM7949203|B_cell	B_cell	GSE249513	GACGTTAAGAGACTTA-1_1_1_1	control
GSM7949203	GSM7949203|B_cell	B_cell	GSE249513	GACGTTAAGATGCCAG-1_1_1_1	control
GSM7949203	GSM7949203|B_cell	B_cell	GSE249513	GACGTTAAGTGCGTGA-1_1_1_1	control
GSM7949203	GSM7949203|B_cell	B_cell	GSE249513	GACGTTAAGTGTCTCA-1_1_1_1	control
GSM7949203	GSM7949203|B_cell	B_cell	GSE249513	GACGTTACACCCATTC-1_1_1_1	control
GSM7949203	GSM7949203|B_cell	B_cell	GSE249513	GACGTTACACTAAGTC-1_1_1_1	control
GSM7949203	GSM7949203|B_cell	B_cell	GSE249513	GACGTTAGTACGCACC-1_1_1_1	control
GSM7949203	GSM7949203|B_cell	B_cell	GSE249513	GACGTTAGTAGCACGA-1_1_1_1	control
GSM7949203	GSM7949203|B_cell	B_cell	GSE249513	GACGTTAGTCACAAGG-1_1_1_1	control
GSM7949203	GSM7949203|B_cell	B_cell	GSE249513	GACGTTAGTCAGAATA-1_1_1_1	control
GSM7949203	GSM7949203|B_cell	B_cell	GSE249513	GACGTTAGTCTAGTGT-1_1_1_1	control
GSM7949203	GSM7949203|B_cell	B_cell	GSE249513	GACGTTATCAGAGCTT-1_1_1_1	control
GSM7949203	GSM7949203|B_cell	B_cell	GSE249513	GACGTTATCGCCGTGA-1_1_1_1	control
GSM7949203	GSM7949203|B_cell	B_cell	GSE249513	GACGTTATCTTGTCAT-1_1_1_1	control
GSM7949203	GSM7949203|B_cell	B_cell	GSE249513	GACTAACCAGACAGGT-1_1_1_1	control
GSM7949203	GSM7949203|B_cell	B_cell	GSE249513	GACTAACGTCAAGCGA-1_1_1_1	control
GSM7949203	GSM7949203|B_cell	B_cell	GSE249513	GACTAACGTGTTAAGA-1_1_1_1	control
GSM7949203	GSM7949203|B_cell	B_cell	GSE249513	GACTACAAGAGTCTGG-1_1_1_1	control
GSM7949203	GSM7949203|B_cell	B_cell	GSE249513	GACTACAAGTCCGTAT-1_1_1_1	control
GSM7949203	GSM7949203|B_cell	B_cell	GSE249513	GACTACACAAGTTAAG-1_1_1_1	control
GSM7949203	GSM7949203|B_cell	B_cell	GSE249513	GACTACATCGTTGCCT-1_1_1_1	control
GSM7949203	GSM7949203|B_cell	B_cell	GSE249513	GACTACATCTAACCGA-1_1_1_1	control
GSM7949203	GSM7949203|B_cell	B_cell	GSE249513	GACTGCGAGATTACCC-1_1_1_1	control
GSM7949203	GSM7949203|B_cell	B_cell	GSE249513	GACTGCGAGGCGACAT-1_1_1_1	control
GSM7949203	GSM7949203|B_cell	B_cell	GSE249513	GACTGCGAGTCTCAAC-1_1_1_1	control
GSM7949203	GSM7949203|B_cell	B_cell	GSE249513	GACTGCGAGTGGGATC-1_1_1_1	control
GSM7949203	GSM7949203|B_cell	B_cell	GSE249513	GACTGCGCACAGGCCT-1_1_1_1	control
GSM7949203	GSM7949203|B_cell	B_cell	GSE249513	GACTGCGCAGGAACGT-1_1_1_1	control
GSM7949203	GSM7949203|B_cell	B_cell	GSE249513	GACTGCGGTCCGCTGA-1_1_1_1	control
GSM7949203	GSM7949203|B_cell	B_cell	GSE249513	GACTGCGTCAACACCA-1_1_1_1	control
GSM7949203	GSM7949203|B_cell	B_cell	GSE249513	GACTGCGTCCAAACAC-1_1_1_1	control
GSM7949203	GSM7949203|B_cell	B_cell	GSE249513	GACTGCGTCCGGCACA-1_1_1_1	control
GSM7949203	GSM7949203|B_cell	B_cell	GSE249513	GACTGCGTCGCCGTGA-1_1_1_1	control
GSM7949203	GSM7949203|B_cell	B_cell	GSE249513	GACTGCGTCTGCTGTC-1_1_1_1	control
GSM7949203	GSM7949203|B_cell	B_cell	GSE249513	GACTGCGTCTTGACGA-1_1_1_1	control
GSM7949203	GSM7949203|B_cell	B_cell	GSE249513	GAGCAGAAGGAGTACC-1_1_1_1	control
GSM7949203	GSM7949203|B_cell	B_cell	GSE249513	GAGCAGAAGGGTGTGT-1_1_1_1	control
GSM7949203	GSM7949203|B_cell	B_cell	GSE249513	GAGCAGAAGTGCGATG-1_1_1_1	control
GSM7949203	GSM7949203|B_cell	B_cell	GSE249513	GAGCAGAGTCAAGCGA-1_1_1_1	control
GSM7949203	GSM7949203|B_cell	B_cell	GSE249513	GAGCAGAGTCGAACAG-1_1_1_1	control
GSM7949203	GSM7949203|B_cell	B_cell	GSE249513	GAGGTGAAGCTAAGAT-1_1_1_1	control
GSM7949203	GSM7949203|B_cell	B_cell	GSE249513	GAGGTGAAGGGATACC-1_1_1_1	control
GSM7949203	GSM7949203|B_cell	B_cell	GSE249513	GAGGTGACAAGACGTG-1_1_1_1	control
GSM7949203	GSM7949203|B_cell	B_cell	GSE249513	GAGGTGACAGCTGTGC-1_1_1_1	control
GSM7949203	GSM7949203|B_cell	B_cell	GSE249513	GAGTCCGAGAAACGAG-1_1_1_1	control
GSM7949203	GSM7949203|B_cell	B_cell	GSE249513	GAGTCCGCACCGGAAA-1_1_1_1	control
GSM7949203	GSM7949203|B_cell	B_cell	GSE249513	GAGTCCGCAGCTGGCT-1_1_1_1	control
GSM7949203	GSM7949203|B_cell	B_cell	GSE249513	GAGTCCGCATGACGGA-1_1_1_1	control
GSM7949203	GSM7949203|B_cell	B_cell	GSE249513	GAGTCCGCATGGGAAC-1_1_1_1	control
GSM7949203	GSM7949203|B_cell	B_cell	GSE249513	GAGTCCGGTTCGGGCT-1_1_1_1	control
GSM7949203	GSM7949203|B_cell	B_cell	GSE249513	GATCAGTAGAAACCGC-1_1_1_1	control
GSM7949203	GSM7949203|B_cell	B_cell	GSE249513	GATCAGTAGCACCGTC-1_1_1_1	control
GSM7949203	GSM7949203|B_cell	B_cell	GSE249513	GATCAGTCAAGCCGCT-1_1_1_1	control
GSM7949203	GSM7949203|B_cell	B_cell	GSE249513	GATCAGTCACAGCCCA-1_1_1_1	control
GSM7949203	GSM7949203|B_cell	B_cell	GSE249513	GATCAGTCACCAGATT-1_1_1_1	control
GSM7949203	GSM7949203|B_cell	B_cell	GSE249513	GATCAGTCACGACTCG-1_1_1_1	control
GSM7949203	GSM7949203|B_cell	B_cell	GSE249513	GATCAGTCAGACTCGC-1_1_1_1	control
GSM7949203	GSM7949203|B_cell	B_cell	GSE249513	GATCAGTCAGATCTGT-1_1_1_1	control
GSM7949203	GSM7949203|B_cell	B_cell	GSE249513	GATCAGTGTACATGTC-1_1_1_1	control
GSM7949203	GSM7949203|B_cell	B_cell	GSE249513	GATCAGTGTCCAACTA-1_1_1_1	control
GSM7949203	GSM7949203|B_cell	B_cell	GSE249513	GATCGATAGTGGGCTA-1_1_1_1	control
GSM7949203	GSM7949203|B_cell	B_cell	GSE249513	GATCGATAGTGTTGAA-1_1_1_1	control
GSM7949203	GSM7949203|B_cell	B_cell	GSE249513	GATCGATCAGACTCGC-1_1_1_1	control
GSM7949203	GSM7949203|B_cell	B_cell	GSE249513	GATCGATCAGGAATCG-1_1_1_1	control
GSM7949203	GSM7949203|B_cell	B_cell	GSE249513	GATCGATCAGGGTACA-1_1_1_1	control
GSM7949203	GSM7949203|B_cell	B_cell	GSE249513	GATCGATGTTCCCTTG-1_1_1_1	control
GSM7949203	GSM7949203|B_cell	B_cell	GSE249513	GATCGATTCCCATTAT-1_1_1_1	control
GSM7949203	GSM7949203|B_cell	B_cell	GSE249513	GATCGATTCCTCATTA-1_1_1_1	control
GSM7949203	GSM7949203|B_cell	B_cell	GSE249513	GATCGATTCTCCCTGA-1_1_1_1	control
GSM7949203	GSM7949203|B_cell	B_cell	GSE249513	GATCGCGAGATCCCGC-1_1_1_1	control
GSM7949203	GSM7949203|B_cell	B_cell	GSE249513	GATCGCGAGCATCATC-1_1_1_1	control
GSM7949203	GSM7949203|B_cell	B_cell	GSE249513	GATCGCGAGCCCAATT-1_1_1_1	control
GSM7949203	GSM7949203|B_cell	B_cell	GSE249513	GATCGCGGTATTAGCC-1_1_1_1	control
GSM7949203	GSM7949203|B_cell	B_cell	GSE249513	GATCGCGGTGATGTCT-1_1_1_1	control
GSM7949203	GSM7949203|B_cell	B_cell	GSE249513	GATCGCGGTGCAGGTA-1_1_1_1	control
GSM7949203	GSM7949203|B_cell	B_cell	GSE249513	GATCGCGGTTACTGAC-1_1_1_1	control
GSM7949203	GSM7949203|B_cell	B_cell	GSE249513	GATCGCGTCCCTAACC-1_1_1_1	control
GSM7949203	GSM7949203|B_cell	B_cell	GSE249513	GATCGCGTCGAGCCCA-1_1_1_1	control
GSM7949203	GSM7949203|B_cell	B_cell	GSE249513	GATCGTAAGAGGGCTT-1_1_1_1	control
GSM7949203	GSM7949203|B_cell	B_cell	GSE249513	GATCGTACACTGTCGG-1_1_1_1	control
GSM7949203	GSM7949203|B_cell	B_cell	GSE249513	GATCGTAGTCAAAGCG-1_1_1_1	control
GSM7949203	GSM7949203|B_cell	B_cell	GSE249513	GATCGTAGTGCACTTA-1_1_1_1	control
GSM7949203	GSM7949203|B_cell	B_cell	GSE249513	GATCGTATCTAGCACA-1_1_1_1	control
GSM7949203	GSM7949203|B_cell	B_cell	GSE249513	GATCGTATCTCTGCTG-1_1_1_1	control
GSM7949203	GSM7949203|B_cell	B_cell	GSE249513	GATCGTATCTGTGCAA-1_1_1_1	control
GSM7949203	GSM7949203|B_cell	B_cell	GSE249513	GATCGTATCTTAGCCC-1_1_1_1	control
GSM7949203	GSM7949203|B_cell	B_cell	GSE249513	GATCGTATCTTGCATT-1_1_1_1	control
GSM7949203	GSM7949203|B_cell	B_cell	GSE249513	GATCTAGCATTGTGCA-1_1_1_1	control
GSM7949203	GSM7949203|B_cell	B_cell	GSE249513	GATCTAGGTACAGCAG-1_1_1_1	control
GSM7949203	GSM7949203|B_cell	B_cell	GSE249513	GATCTAGGTTACCAGT-1_1_1_1	control
GSM7949203	GSM7949203|B_cell	B_cell	GSE249513	GATCTAGGTTACGGAG-1_1_1_1	control
GSM7949203	GSM7949203|B_cell	B_cell	GSE249513	GATCTAGTCTGGCGAC-1_1_1_1	control
GSM7949203	GSM7949203|B_cell	B_cell	GSE249513	GATGAAAAGAAGGTTT-1_1_1_1	control
GSM7949203	GSM7949203|B_cell	B_cell	GSE249513	GATGAAAAGCTGTCTA-1_1_1_1	control
GSM7949203	GSM7949203|B_cell	B_cell	GSE249513	GATGAAACAAACCCAT-1_1_1_1	control
GSM7949203	GSM7949203|B_cell	B_cell	GSE249513	GATGAAACACAGACTT-1_1_1_1	control
GSM7949203	GSM7949203|B_cell	B_cell	GSE249513	GATGAAACATCCTAGA-1_1_1_1	control
GSM7949203	GSM7949203|B_cell	B_cell	GSE249513	GATGAAACATGCATGT-1_1_1_1	control
GSM7949203	GSM7949203|B_cell	B_cell	GSE249513	GATGAAAGTCTAGGTT-1_1_1_1	control
GSM7949203	GSM7949203|B_cell	B_cell	GSE249513	GATGAAAGTCTTGTCC-1_1_1_1	control
GSM7949203	GSM7949203|B_cell	B_cell	GSE249513	GATGAAAGTGCAGACA-1_1_1_1	control
GSM7949203	GSM7949203|B_cell	B_cell	GSE249513	GATGAAAGTTATTCTC-1_1_1_1	control
GSM7949203	GSM7949203|B_cell	B_cell	GSE249513	GATGAGGAGCGATTCT-1_1_1_1	control
GSM7949203	GSM7949203|B_cell	B_cell	GSE249513	GATGAGGAGCTAGCCC-1_1_1_1	control
GSM7949203	GSM7949203|B_cell	B_cell	GSE249513	GATGAGGCAAGCCTAT-1_1_1_1	control
GSM7949203	GSM7949203|B_cell	B_cell	GSE249513	GATGAGGCAATCACAC-1_1_1_1	control
GSM7949203	GSM7949203|B_cell	B_cell	GSE249513	GATGAGGCACCCATTC-1_1_1_1	control
GSM7949203	GSM7949203|B_cell	B_cell	GSE249513	GATGAGGGTCCGAAGA-1_1_1_1	control
GSM7949203	GSM7949203|B_cell	B_cell	GSE249513	GATGAGGGTTCACGGC-1_1_1_1	control
GSM7949203	GSM7949203|B_cell	B_cell	GSE249513	GATGCTAAGACTACAA-1_1_1_1	control
GSM7949203	GSM7949203|B_cell	B_cell	GSE249513	GATGCTAAGATGTAAC-1_1_1_1	control
GSM7949203	GSM7949203|B_cell	B_cell	GSE249513	GATGCTAAGCCCAATT-1_1_1_1	control
GSM7949203	GSM7949203|B_cell	B_cell	GSE249513	GATGCTAAGGCTAGCA-1_1_1_1	control
GSM7949203	GSM7949203|B_cell	B_cell	GSE249513	GATGCTACAGTCCTTC-1_1_1_1	control
GSM7949203	GSM7949203|B_cell	B_cell	GSE249513	GATGCTACATCAGTAC-1_1_1_1	control
GSM7949203	GSM7949203|B_cell	B_cell	GSE249513	GATGCTAGTACTCAAC-1_1_1_1	control
GSM7949203	GSM7949203|B_cell	B_cell	GSE249513	GATGCTAGTGGACGAT-1_1_1_1	control
GSM7949203	GSM7949203|B_cell	B_cell	GSE249513	GATGCTATCGGTGTTA-1_1_1_1	control
GSM7949203	GSM7949203|B_cell	B_cell	GSE249513	GATGCTATCTGTTGAG-1_1_1_1	control
GSM7949203	GSM7949203|B_cell	B_cell	GSE249513	GATGCTATCTTCAACT-1_1_1_1	control
GSM7949203	GSM7949203|B_cell	B_cell	GSE249513	GATTCAGAGGTAGCTG-1_1_1_1	control
GSM7949203	GSM7949203|B_cell	B_cell	GSE249513	GATTCAGAGTGTCCCG-1_1_1_1	control
GSM7949203	GSM7949203|B_cell	B_cell	GSE249513	GATTCAGCATGGGAAC-1_1_1_1	control
GSM7949203	GSM7949203|B_cell	B_cell	GSE249513	GATTCAGGTAGGACAC-1_1_1_1	control
GSM7949203	GSM7949203|B_cell	B_cell	GSE249513	GATTCAGGTCAGATAA-1_1_1_1	control
GSM7949203	GSM7949203|B_cell	B_cell	GSE249513	GATTCAGTCACCTTAT-1_1_1_1	control
GSM7949203	GSM7949203|B_cell	B_cell	GSE249513	GATTCAGTCACGAAGG-1_1_1_1	control
GSM7949203	GSM7949203|B_cell	B_cell	GSE249513	GCAAACTAGAAGGACA-1_1_1_1	control
GSM7949203	GSM7949203|B_cell	B_cell	GSE249513	GCAAACTAGCAGCGTA-1_1_1_1	control
GSM7949203	GSM7949203|B_cell	B_cell	GSE249513	GCAAACTAGGCTATCT-1_1_1_1	control
GSM7949203	GSM7949203|B_cell	B_cell	GSE249513	GCAAACTAGTTACCCA-1_1_1_1	control
GSM7949203	GSM7949203|B_cell	B_cell	GSE249513	GCAAACTCAAACGCGA-1_1_1_1	control
GSM7949203	GSM7949203|B_cell	B_cell	GSE249513	GCAAACTCAATCTGCA-1_1_1_1	control
GSM7949203	GSM7949203|B_cell	B_cell	GSE249513	GCAAACTCAATTCCTT-1_1_1_1	control
GSM7949203	GSM7949203|B_cell	B_cell	GSE249513	GCAAACTGTAGCACGA-1_1_1_1	control
GSM7949203	GSM7949203|B_cell	B_cell	GSE249513	GCAAACTGTCCCGACA-1_1_1_1	control
GSM7949203	GSM7949203|B_cell	B_cell	GSE249513	GCAAACTGTGTGAAAT-1_1_1_1	control
GSM7949203	GSM7949203|B_cell	B_cell	GSE249513	GCAAACTGTTCGGCAC-1_1_1_1	control
GSM7949203	GSM7949203|B_cell	B_cell	GSE249513	GCAAACTTCAGTCAGT-1_1_1_1	control
GSM7949203	GSM7949203|B_cell	B_cell	GSE249513	GCAAACTTCCGCATAA-1_1_1_1	control
GSM7949203	GSM7949203|B_cell	B_cell	GSE249513	GCAAACTTCCTGCAGG-1_1_1_1	control
GSM7949203	GSM7949203|B_cell	B_cell	GSE249513	GCAAACTTCTCCAACC-1_1_1_1	control
GSM7949203	GSM7949203|B_cell	B_cell	GSE249513	GCAAACTTCTCGAGTA-1_1_1_1	control
GSM7949203	GSM7949203|B_cell	B_cell	GSE249513	GCAATCAAGAGTCTGG-1_1_1_1	control
GSM7949203	GSM7949203|B_cell	B_cell	GSE249513	GCAATCAAGCACACAG-1_1_1_1	control
GSM7949203	GSM7949203|B_cell	B_cell	GSE249513	GCAATCACAAAGGAAG-1_1_1_1	control
GSM7949203	GSM7949203|B_cell	B_cell	GSE249513	GCAATCACAACACGCC-1_1_1_1	control
GSM7949203	GSM7949203|B_cell	B_cell	GSE249513	GCAATCACAAGTTCTG-1_1_1_1	control
GSM7949203	GSM7949203|B_cell	B_cell	GSE249513	GCAATCAGTACAGACG-1_1_1_1	control
GSM7949203	GSM7949203|B_cell	B_cell	GSE249513	GCAATCAGTCCAGTGC-1_1_1_1	control
GSM7949203	GSM7949203|B_cell	B_cell	GSE249513	GCAATCAGTCGCCATG-1_1_1_1	control
GSM7949203	GSM7949203|B_cell	B_cell	GSE249513	GCAATCATCTAACGGT-1_1_1_1	control
GSM7949203	GSM7949203|B_cell	B_cell	GSE249513	GCAATCATCTATCGCC-1_1_1_1	control
GSM7949203	GSM7949203|B_cell	B_cell	GSE249513	GCAATCATCTCTGAGA-1_1_1_1	control
GSM7949203	GSM7949203|B_cell	B_cell	GSE249513	GCACATAAGTACACCT-1_1_1_1	control
GSM7949203	GSM7949203|B_cell	B_cell	GSE249513	GCACATACACAAGACG-1_1_1_1	control
GSM7949203	GSM7949203|B_cell	B_cell	GSE249513	GCACATACAGTTAACC-1_1_1_1	control
GSM7949203	GSM7949203|B_cell	B_cell	GSE249513	GCACATACATTCCTGC-1_1_1_1	control
GSM7949203	GSM7949203|B_cell	B_cell	GSE249513	GCACATAGTCAGAAGC-1_1_1_1	control
GSM7949203	GSM7949203|B_cell	B_cell	GSE249513	GCACATAGTCAGAGGT-1_1_1_1	control
GSM7949203	GSM7949203|B_cell	B_cell	GSE249513	GCACATAGTCTAAAGA-1_1_1_1	control
GSM7949203	GSM7949203|B_cell	B_cell	GSE249513	GCACATAGTGACTACT-1_1_1_1	control
GSM7949203	GSM7949203|B_cell	B_cell	GSE249513	GCACATAGTTTGCATG-1_1_1_1	control
GSM7949203	GSM7949203|B_cell	B_cell	GSE249513	GCACATATCTGGTATG-1_1_1_1	control
GSM7949203	GSM7949203|B_cell	B_cell	GSE249513	GCACTCTAGCCACCTG-1_1_1_1	control
GSM7949203	GSM7949203|B_cell	B_cell	GSE249513	GCACTCTAGCGTAGTG-1_1_1_1	control
GSM7949203	GSM7949203|B_cell	B_cell	GSE249513	GCACTCTAGTGGGTTG-1_1_1_1	control
GSM7949203	GSM7949203|B_cell	B_cell	GSE249513	GCACTCTGTATTAGCC-1_1_1_1	control
GSM7949203	GSM7949203|B_cell	B_cell	GSE249513	GCACTCTGTCCGTCAG-1_1_1_1	control
GSM7949203	GSM7949203|B_cell	B_cell	GSE249513	GCACTCTGTGAGGCTA-1_1_1_1	control
GSM7949203	GSM7949203|B_cell	B_cell	GSE249513	GCACTCTGTGCACGAA-1_1_1_1	control
GSM7949203	GSM7949203|B_cell	B_cell	GSE249513	GCACTCTGTTCGCGAC-1_1_1_1	control
GSM7949203	GSM7949203|B_cell	B_cell	GSE249513	GCACTCTTCAGGCAAG-1_1_1_1	control
GSM7949203	GSM7949203|B_cell	B_cell	GSE249513	GCACTCTTCATGTCCC-1_1_1_1	control
GSM7949203	GSM7949203|B_cell	B_cell	GSE249513	GCACTCTTCTTTAGGG-1_1_1_1	control
GSM7949203	GSM7949203|B_cell	B_cell	GSE249513	GCAGCCAAGCCACGTC-1_1_1_1	control
GSM7949203	GSM7949203|B_cell	B_cell	GSE249513	GCAGCCAAGTATGACA-1_1_1_1	control
GSM7949203	GSM7949203|B_cell	B_cell	GSE249513	GCAGCCAAGTGTCTCA-1_1_1_1	control
GSM7949203	GSM7949203|B_cell	B_cell	GSE249513	GCAGCCATCTTGTATC-1_1_1_1	control
GSM7949203	GSM7949203|B_cell	B_cell	GSE249513	GCAGTTAAGACCCACC-1_1_1_1	control
GSM7949203	GSM7949203|B_cell	B_cell	GSE249513	GCAGTTAAGAGCCTAG-1_1_1_1	control
GSM7949203	GSM7949203|B_cell	B_cell	GSE249513	GCAGTTAAGATCCCAT-1_1_1_1	control
GSM7949203	GSM7949203|B_cell	B_cell	GSE249513	GCAGTTACACCATCCT-1_1_1_1	control
GSM7949203	GSM7949203|B_cell	B_cell	GSE249513	GCAGTTACATTAACCG-1_1_1_1	control
GSM7949203	GSM7949203|B_cell	B_cell	GSE249513	GCAGTTAGTCCAGTGC-1_1_1_1	control
GSM7949203	GSM7949203|B_cell	B_cell	GSE249513	GCAGTTATCAGTTCGA-1_1_1_1	control
GSM7949203	GSM7949203|B_cell	B_cell	GSE249513	GCAGTTATCCCTCTTT-1_1_1_1	control
GSM7949203	GSM7949203|B_cell	B_cell	GSE249513	GCAGTTATCCGTTGTC-1_1_1_1	control
GSM7949203	GSM7949203|B_cell	B_cell	GSE249513	GCAGTTATCTTCCTTC-1_1_1_1	control
GSM7949203	GSM7949203|B_cell	B_cell	GSE249513	GCATACACACATTTCT-1_1_1_1	control
GSM7949203	GSM7949203|B_cell	B_cell	GSE249513	GCATACAGTCCTGCTT-1_1_1_1	control
GSM7949203	GSM7949203|B_cell	B_cell	GSE249513	GCATACAGTCTTCGTC-1_1_1_1	control
GSM7949203	GSM7949203|B_cell	B_cell	GSE249513	GCATACAGTGACGGTA-1_1_1_1	control
GSM7949203	GSM7949203|B_cell	B_cell	GSE249513	GCATACAGTGCGCTTG-1_1_1_1	control
GSM7949203	GSM7949203|B_cell	B_cell	GSE249513	GCATACAGTTCCGGCA-1_1_1_1	control
GSM7949203	GSM7949203|B_cell	B_cell	GSE249513	GCATACATCAGAGCTT-1_1_1_1	control
GSM7949203	GSM7949203|B_cell	B_cell	GSE249513	GCATGATAGAGACGAA-1_1_1_1	control
GSM7949203	GSM7949203|B_cell	B_cell	GSE249513	GCATGATAGCACAGGT-1_1_1_1	control
GSM7949203	GSM7949203|B_cell	B_cell	GSE249513	GCATGATAGGGTCTCC-1_1_1_1	control
GSM7949203	GSM7949203|B_cell	B_cell	GSE249513	GCATGATAGGGTTTCT-1_1_1_1	control
GSM7949203	GSM7949203|B_cell	B_cell	GSE249513	GCATGATGTACAGCAG-1_1_1_1	control
GSM7949203	GSM7949203|B_cell	B_cell	GSE249513	GCATGATGTCCAACTA-1_1_1_1	control
GSM7949203	GSM7949203|B_cell	B_cell	GSE249513	GCATGATTCGCCAGCA-1_1_1_1	control
GSM7949203	GSM7949203|B_cell	B_cell	GSE249513	GCATGATTCGGCCGAT-1_1_1_1	control
GSM7949203	GSM7949203|B_cell	B_cell	GSE249513	GCATGATTCTTCAACT-1_1_1_1	control
GSM7949203	GSM7949203|B_cell	B_cell	GSE249513	GCATGCGAGTAGATGT-1_1_1_1	control
GSM7949203	GSM7949203|B_cell	B_cell	GSE249513	GCATGCGCAGATCGGA-1_1_1_1	control
GSM7949203	GSM7949203|B_cell	B_cell	GSE249513	GCATGCGCATTCTTAC-1_1_1_1	control
GSM7949203	GSM7949203|B_cell	B_cell	GSE249513	GCATGCGGTAGGGACT-1_1_1_1	control
GSM7949203	GSM7949203|B_cell	B_cell	GSE249513	GCATGCGGTTACTGAC-1_1_1_1	control
GSM7949203	GSM7949203|B_cell	B_cell	GSE249513	GCATGCGTCAACACTG-1_1_1_1	control
GSM7949203	GSM7949203|B_cell	B_cell	GSE249513	GCATGCGTCCTAGGGC-1_1_1_1	control
GSM7949203	GSM7949203|B_cell	B_cell	GSE249513	GCATGTATCCGTACAA-1_1_1_1	control
GSM7949203	GSM7949203|B_cell	B_cell	GSE249513	GCATGTATCGTGGACC-1_1_1_1	control
GSM7949203	GSM7949203|B_cell	B_cell	GSE249513	GCCAAATAGTTATCGC-1_1_1_1	control
GSM7949203	GSM7949203|B_cell	B_cell	GSE249513	GCCAAATCAAGACACG-1_1_1_1	control
GSM7949203	GSM7949203|B_cell	B_cell	GSE249513	GCCAAATCATCGACGC-1_1_1_1	control
GSM7949203	GSM7949203|B_cell	B_cell	GSE249513	GCCAAATCATGTCCTC-1_1_1_1	control
GSM7949203	GSM7949203|B_cell	B_cell	GSE249513	GCCAAATGTTACCAGT-1_1_1_1	control
GSM7949203	GSM7949203|B_cell	B_cell	GSE249513	GCCAAATTCAACTCTT-1_1_1_1	control
GSM7949203	GSM7949203|B_cell	B_cell	GSE249513	GCCAAATTCCAACCAA-1_1_1_1	control
GSM7949203	GSM7949203|B_cell	B_cell	GSE249513	GCCAAATTCCTAGTGA-1_1_1_1	control
GSM7949203	GSM7949203|B_cell	B_cell	GSE249513	GCCAAATTCGTTTGCC-1_1_1_1	control
GSM7949203	GSM7949203|B_cell	B_cell	GSE249513	GCCAAATTCTTACCGC-1_1_1_1	control
GSM7949203	GSM7949203|B_cell	B_cell	GSE249513	GCCTCTAAGGGTCTCC-1_1_1_1	control
GSM7949203	GSM7949203|B_cell	B_cell	GSE249513	GCCTCTACACAACGTT-1_1_1_1	control
GSM7949203	GSM7949203|B_cell	B_cell	GSE249513	GCCTCTACAGGACGTA-1_1_1_1	control
GSM7949203	GSM7949203|B_cell	B_cell	GSE249513	GCCTCTAGTAATAGCA-1_1_1_1	control
GSM7949203	GSM7949203|B_cell	B_cell	GSE249513	GCCTCTAGTAGCGCTC-1_1_1_1	control
GSM7949203	GSM7949203|B_cell	B_cell	GSE249513	GCCTCTAGTTGTTTGG-1_1_1_1	control
GSM7949203	GSM7949203|B_cell	B_cell	GSE249513	GCCTCTATCCCTAATT-1_1_1_1	control
GSM7949203	GSM7949203|B_cell	B_cell	GSE249513	GCGACCAAGATACACA-1_1_1_1	control
GSM7949203	GSM7949203|B_cell	B_cell	GSE249513	GCGACCAAGGTGCAAC-1_1_1_1	control
GSM7949203	GSM7949203|B_cell	B_cell	GSE249513	GCGACCACAATGTAAG-1_1_1_1	control
GSM7949203	GSM7949203|B_cell	B_cell	GSE249513	GCGACCAGTGTCGCTG-1_1_1_1	control
GSM7949203	GSM7949203|B_cell	B_cell	GSE249513	GCGACCATCTACCTGC-1_1_1_1	control
GSM7949203	GSM7949203|B_cell	B_cell	GSE249513	GCGAGAAAGAGGACGG-1_1_1_1	control
GSM7949203	GSM7949203|B_cell	B_cell	GSE249513	GCGAGAACAAGGTGTG-1_1_1_1	control
GSM7949203	GSM7949203|B_cell	B_cell	GSE249513	GCGAGAACACACGCTG-1_1_1_1	control
GSM7949203	GSM7949203|B_cell	B_cell	GSE249513	GCGAGAACACGGCCAT-1_1_1_1	control
GSM7949203	GSM7949203|B_cell	B_cell	GSE249513	GCGAGAATCGTAGGAG-1_1_1_1	control
GSM7949203	GSM7949203|B_cell	B_cell	GSE249513	GCGAGAATCGTGGTCG-1_1_1_1	control
GSM7949203	GSM7949203|B_cell	B_cell	GSE249513	GCGCAACAGCCAACAG-1_1_1_1	control
GSM7949203	GSM7949203|B_cell	B_cell	GSE249513	GCGCAACAGCGTTGCC-1_1_1_1	control
GSM7949203	GSM7949203|B_cell	B_cell	GSE249513	GCGCAACAGGATCGCA-1_1_1_1	control
GSM7949203	GSM7949203|B_cell	B_cell	GSE249513	GCGCAACAGTAAGTAC-1_1_1_1	control
[truncated: 329,629+ more rows]

## Sheet: Table S3(GSE143706_sample_anno)
Table S3: The cell type in the GSE143706
sample_id	sample_celltype	celltype	condition	dataset
GSM4272915	GSM4272915|Epithelial_cells	Epithelial_cells	control	GSE143706
GSM4272916	GSM4272916|Epithelial_cells	Epithelial_cells	control	GSE143706
GSM4272916	GSM4272916|Macrophage	Macrophage	control	GSE143706
GSM4272918	GSM4272918|Epithelial_cells	Epithelial_cells	control	GSE143706
GSM4272919	GSM4272919|Epithelial_cells	Epithelial_cells	control	GSE143706
GSM4272920	GSM4272920|Epithelial_cells	Epithelial_cells	control	GSE143706
GSM4272920	GSM4272920|Macrophage	Macrophage	control	GSE143706
GSM4272923	GSM4272923|Epithelial_cells	Epithelial_cells	IPF	GSE143706
GSM4272923	GSM4272923|Macrophage	Macrophage	IPF	GSE143706
GSM4272926	GSM4272926|Epithelial_cells	Epithelial_cells	IPF	GSE143706
GSM4272926	GSM4272926|Macrophage	Macrophage	IPF	GSE143706
