# Supplementary material
Source: Research Square preprint supplement (doi:10.21203/rs.3.rs-9392286/v1)
Supplement: Supplementary file 2 [file 23f5d411b1ffaa553d80c85b.xlsx]

## Sheet: Table S5(MEs_T Cells)
Table S5：MEs in the T Cell
	MEblue	MEturquoise	MEgrey
GSM3660641|T_cells	0.145336833828493	-0.201189	-0.203355
GSM3660642|T_cells	0.463830668297907	-0.0728948	-0.0808774
GSM3660643|T_cells	0.436422689073962	-0.0838708	-0.0948757
GSM3660644|T_cells	0.175373918817309	-0.204754	-0.20916
GSM3660645|T_cells	0.386061147003954	-0.0946912	-0.0990394
GSM3660646|T_cells	0.173236037830107	-0.208274	-0.214823
GSM3660647|T_cells	-0.0662015	-0.191983	-0.197637
GSM3660648|T_cells	0.0790672972468958	-0.216506	-0.224844
GSM3660651|T_cells	-0.0429352	-0.202558	-0.208255
GSM3660652|T_cells	-0.0063027	-0.218559	-0.225402
GSM3660653|T_cells	0.0183624569290932	-0.213656	-0.220756
GSM3660654|T_cells	0.0311606516532876	-0.241716	-0.247783
GSM3660655|T_cells	0.0711103244914569	-0.235629	-0.239249
GSM3660656|T_cells	0.0437885987844728	-0.228228	-0.23231
GSM3660657|T_cells	-0.107698	-0.218264	-0.225114
GSM3660658|T_cells	0.0646089599187661	-0.213725	-0.215844
GSM8686555|T_cells	-0.167389	0.119791305931765	0.108796229767362
GSM8686556|T_cells	-0.105726	0.100184699403117	0.110705229024833
GSM8686557|T_cells	-0.076809	0.129446481082402	0.104212481467174
GSM8686558|T_cells	0.0418379095812083	0.0836408980862925	0.10779183152854
GSM8686559|T_cells	-0.0717419	0.0874886317998295	0.112242035181083
GSM8686560|T_cells	-0.221668	0.0852160367746834	0.114000191321493
GSM8686561|T_cells	-0.119686	0.0629013615779173	0.114390375395499
GSM8686562|T_cells	-0.110234	0.105038614898739	0.111993129257296
GSM8686563|T_cells	-0.0707423	0.151697189586853	0.102208377856993
GSM8686564|T_cells	-0.13545	0.18988967396543	0.0954004213558135
GSM8686565|T_cells	-0.046707	0.0984636435827579	0.110664965595325
GSM8686566|T_cells	0.0770219777009691	0.0105235048512392	0.115559448545433
GSM8686567|T_cells	-0.0747307	0.131142274420329	0.105808303373087
GSM8686568|T_cells	-0.082704	0.0588009650093647	0.114461811086997
GSM8686569|T_cells	-0.155132	0.0676564022553227	0.115704699107915
GSM8686570|T_cells	-0.0661833	0.120744458096018	0.10491243595923
GSM8686571|T_cells	-0.0889323	0.178681119809025	0.0942321554063317
GSM8686572|T_cells	0.0157910899052967	0.0999640700573208	0.106058309045866
GSM8686573|T_cells	-0.0764981	0.0971897774291727	0.113050614890893
GSM8686574|T_cells	-0.0459385	0.115854425150946	0.106137256989775
GSM8686575|T_cells	0.0102686455470846	0.0537580798680749	0.113976939335645
GSM8686576|T_cells	-0.0935634	0.185729272165446	0.0922078035075454
GSM8686577|T_cells	0.154454897857434	0.0463300331444172	0.114656862521288
GSM8686578|T_cells	-0.0266295	0.113066008004256	0.107390590077981
GSM8686579|T_cells	-0.205418	0.169509968708616	0.102313066634327
GSM8686580|T_cells	-0.121287	0.108127840009357	0.108797879544713
GSM8686581|T_cells	0.114442048880264	0.0343814951515276	0.116011626296042
GSM8686582|T_cells	-0.0394234	0.100371470282224	0.110287609845049
GSM8686583|T_cells	-0.0764451	0.1409087045903	0.105351596605738

## Sheet: Table S5(MEs_SM)
Table S5: MEs in SM Cell
	MEblue	MEbrown	MEturquoise	MEgrey
GSM3660641|Smooth_muscle_cells	-0.0650927	-0.117994	-0.192253	-0.203219
GSM3660642|Smooth_muscle_cells	0.0175572623995929	-0.0142332	-0.141324	-0.166977
GSM3660643|Smooth_muscle_cells	-0.205147	-0.241725	-0.282386	-0.265007
GSM3660644|Smooth_muscle_cells	0.0311222998213687	-0.0342964	-0.131371	-0.161973
GSM3660645|Smooth_muscle_cells	-0.0701183	-0.092284	-0.195427	-0.206407
GSM3660646|Smooth_muscle_cells	-0.00570382	-0.0529948	-0.154619	-0.178067
GSM3660647|Smooth_muscle_cells	-0.0768438	-0.148354	-0.199901	-0.210107
GSM3660648|Smooth_muscle_cells	-0.0356801	-0.0743902	-0.173232	-0.191124
GSM3660651|Smooth_muscle_cells	0.0403223881482866	-0.0122987	-0.12587	-0.158312
GSM3660652|Smooth_muscle_cells	-0.0675507	-0.136884	-0.194753	-0.205037
GSM3660653|Smooth_muscle_cells	0.0526505821015077	0.00988369090723985	-0.117133	-0.151331
GSM3660654|Smooth_muscle_cells	-0.103068	-0.121922	-0.216394	-0.220267
GSM3660655|Smooth_muscle_cells	-0.134766	-0.194075	-0.237766	-0.235031
GSM3660656|Smooth_muscle_cells	-0.019793	-0.0389038	-0.162977	-0.182971
GSM3660657|Smooth_muscle_cells	-0.171417	-0.237173	-0.259824	-0.250164
GSM3660658|Smooth_muscle_cells	-0.0524021	-0.11836	-0.183685	-0.197624
GSM8686555|Smooth_muscle_cells	0.0973120057678769	0.00120435507115193	0.144021956843597	0.105997949591066
GSM8686556|Smooth_muscle_cells	0.0776996189446413	-0.0563499	0.153567415336948	0.108323374088937
GSM8686557|Smooth_muscle_cells	0.230730893172841	-0.0818774	0.155467028234898	0.102117214557597
GSM8686558|Smooth_muscle_cells	-0.0451149	0.135728512696984	0.0937899910041143	0.109741876886093
GSM8686559|Smooth_muscle_cells	-0.0301783	-0.145227	0.130282077342758	0.111354000840748
GSM8686560|Smooth_muscle_cells	-0.177021	-0.0752205	0.1390398513244	0.102447619039211
GSM8686561|Smooth_muscle_cells	-0.0993736	0.119957040069857	0.092036352012907	0.111208277746093
GSM8686562|Smooth_muscle_cells	-0.0327233	-0.198531	0.152837033422767	0.102340870437327
GSM8686563|Smooth_muscle_cells	0.147287496395487	0.0229958151238758	0.135622048630516	0.0994019241375168
GSM8686564|Smooth_muscle_cells	0.238475048982538	-0.0713101	0.14643010607326	0.102688301030899
GSM8686565|Smooth_muscle_cells	0.0161000889455251	0.212609239754123	0.101910587922978	0.111331311899875
GSM8686566|Smooth_muscle_cells	-0.300192	0.148325028004006	0.0552355827316882	0.113602853685387
GSM8686567|Smooth_muscle_cells	0.197699885264545	0.0730400496802784	0.132515968153524	0.10797191348781
GSM8686568|Smooth_muscle_cells	-0.153915	0.0750473786295675	0.0948231542053222	0.111921304534707
GSM8686569|Smooth_muscle_cells	-0.130239	0.0368536988261791	0.098568549022434	0.113767899837737
GSM8686570|Smooth_muscle_cells	0.0873518714759729	0.0604340153164144	0.119753263058251	0.108141900000183
GSM8686571|Smooth_muscle_cells	0.322425531655649	0.199776837999353	0.0839931955170315	0.106261901457883
GSM8686572|Smooth_muscle_cells	0.044552084345972	0.0557660725571328	0.137334080095911	0.107294893047581
GSM8686573|Smooth_muscle_cells	0.0985582523487137	0.0348907253787914	0.122705004193928	0.113234563144342
GSM8686574|Smooth_muscle_cells	0.18743118968329	0.179808213210074	0.105332552681402	0.110449127376744
GSM8686575|Smooth_muscle_cells	-0.206743	-0.0220493	0.131265003669825	0.104912576820647
GSM8686576|Smooth_muscle_cells	0.448589378967445	0.227488714621981	-0.178406	0.129263436732782
GSM8686577|Smooth_muscle_cells	-0.191539	0.34885442733412	0.0331406906989183	0.118521465348816
GSM8686578|Smooth_muscle_cells	0.0463202382469135	-0.00895822	0.13440601630096	0.11016467199518
GSM8686579|Smooth_muscle_cells	0.178636320524523	-0.322593	0.10391766332999	0.109047303931355
GSM8686580|Smooth_muscle_cells	0.0178970148757972	-0.0216016	0.132874746888827	0.11074367146909
GSM8686581|Smooth_muscle_cells	-0.18355	0.0933603136120351	0.105503388835694	0.108594036713421
GSM8686582|Smooth_muscle_cells	-0.0102993	0.317116089908254	0.0552259552777612	0.114439687730726
GSM8686583|Smooth_muscle_cells	-0.0102487	0.286465428682728	0.0557192684937825	0.118330324730457

## Sheet: Table S5(MEs_Macrophage)
	Table S5: MEs in Macrophage Cell
	MEblack	MEblue	MEbrown	MEturquoise	MEpurple	MEred	MEmagenta	MEyellow	MEgreen	MEpink	MEgrey
GSM3660641|Macrophage	-0.0311427	-0.242282	-0.377215	0.195978295787056	-0.318067	-0.444285	-0.271788	-0.148324	-0.388731	-0.314831	0.235070777554282
GSM3660642|Macrophage	-0.135783	-0.18523	-0.229631	0.184255695888449	-0.00158229	-0.196229	0.0661977324409889	0.112030192553384	-0.0738587	-0.0729656	0.195201132411236
GSM3660643|Macrophage	-0.136487	-0.21448	-0.267695	0.206031360618682	-0.045176	-0.255252	0.0518428117751699	0.111394184543567	-0.0877103	-0.0896618	0.212084285273867
GSM3660644|Macrophage	-0.103107	-0.173903	-0.219634	0.188250629502594	-0.132517	-0.151223	0.0848678256311445	0.126209043469581	-0.0525962	-0.0430714	0.19869980106785
GSM3660645|Macrophage	-0.0381113	-0.184578	-0.216304	0.190544624920331	0.119033014675332	-0.0894074	0.0220796625424796	-0.0385989	-0.129948	-0.240444	0.197294389826776
GSM3660646|Macrophage	0.0402121346616952	-0.172175	-0.236476	0.192486667907584	0.0613787174487659	-0.111228	-0.00373642	-0.0268282	-0.195997	-0.178364	0.205287399181688
GSM3660647|Macrophage	-0.0290227	-0.190943	-0.220273	0.21534245855066	0.0717784504220162	-0.0655572	0.0559636566823765	0.0419984959840169	-0.136161	-0.154549	0.212268536985786
GSM3660648|Macrophage	-0.00717161	-0.197479	-0.182132	0.216263509961649	0.162067	0.0152589629077029	0.0901908102229079	0.0717325177168692	-0.0857853	-0.127569	0.208236203325311
GSM3660651|Macrophage	-0.232174	-0.205019	-0.0840943	0.204569967128986	0.185013060091788	0.260009371042662	0.175467505516965	0.166787790126273	0.0314913754826548	-0.00834106	0.198205468718723
GSM3660652|Macrophage	-0.0893199	-0.198859	-0.117876	0.205368712011046	0.147632106476482	0.125359830258695	0.171088824690333	0.128288026327802	0.0176338082558074	-0.0323059	0.20521843909973
GSM3660653|Macrophage	-0.22445	-0.210759	-0.0877043	0.207440307645197	0.150363241360114	0.238994707521949	0.18998185892151	0.183238410932042	0.0487660666954928	0.00383926764725765	0.204026496388107
GSM3660654|Macrophage	-0.324592	-0.211208	-0.0255615	0.180206073065166	0.180381016366654	0.176133535339982	0.305825699829498	0.349860971183161	0.238367498815723	0.177347816606378	0.175206211158225
GSM3660655|Macrophage	0.0281500617560846	-0.183953	-0.245143	0.201405026529451	-0.025473	-0.134908	-0.0274446	0.0247619312889685	-0.169458	-0.1165	0.209192495027689
GSM3660656|Macrophage	-0.339265	-0.211672	-0.0265385	0.1802425725136	0.162376319681698	0.173380989355977	0.3053331536907	0.357912971488731	0.242460355588306	0.184254010490347	0.177175882413287
GSM3660657|Macrophage	-0.357887	-0.20082	-0.0633681	0.184730347751488	0.149672681797418	0.0755491891862424	0.285226524202169	0.327718885630623	0.196183805988031	0.153165108667023	0.177696113920992
GSM3660658|Macrophage	-0.208607	-0.193141	-0.121891	0.202441763872895	0.20533604685808	0.128570655519003	0.113775976683842	0.115877545648583	-0.0336008	-0.0531803	0.191160775388128
GSM8686555|Macrophage	0.0984015445405039	0.102342623388052	0.0933574195671874	-0.0832547	-0.0711061	0.0436373911652838	-0.0819704	-0.022549	-0.000935685	0.0871229560273678	-0.108553
GSM8686556|Macrophage	0.211512689580226	0.123520562182266	0.111473744872453	-0.102672	-0.0702945	0.0864915588690842	-0.0906028	-0.0893809	-0.0318416	0.0263643904836213	-0.111017
GSM8686557|Macrophage	0.0897782200993516	0.0939707720907174	0.0869735218984924	-0.0825255	-0.148036	-0.0472415	0.00555013803081946	0.0214721038793114	0.0786206175373547	0.155353343744475	-0.105465
GSM8686558|Macrophage	-0.0252283	0.106324327139424	0.15890953590112	-0.11177	-0.0250052	0.133130214182561	0.0181538903853354	0.0716276682033568	0.154805120844443	0.196707969917017	-0.11029
GSM8686559|Macrophage	-0.0175173	0.126316018379153	0.199870583703313	-0.154591	-0.0307768	0.0660234686331427	0.0994719992054036	0.185562048077243	0.260237389460331	0.347481523689075	-0.125016
GSM8686560|Macrophage	0.154890642336334	0.14138857121278	0.10523512149378	-0.172365	-0.264045	-0.0870514	-0.0714905	-0.0102484	0.0523393210050057	0.159297474866264	-0.124011
GSM8686561|Macrophage	0.0570764438455223	0.104299988554025	0.134832304197333	-0.125479	-0.0839587	0.055825971921245	-0.0405203	0.0875969478669393	0.125353764433667	0.232291487846418	-0.1045
GSM8686562|Macrophage	0.0784316175243463	0.115520474400852	0.185128184887252	-0.138463	0.0360488291604338	0.0883873876165421	0.0936730994294399	0.067838891196404	0.161615728522455	0.223602145959081	-0.117778
GSM8686563|Macrophage	0.147696232864071	0.118597530131413	0.0329459953498616	-0.124277	-0.140344	-0.0773135	-0.141752	-0.0120997	-0.107618	0.115019300687784	-0.116228
GSM8686564|Macrophage	0.164254692270619	0.11339407037271	-0.0429672	-0.12959	-0.306221	-0.294347	-0.293691	-0.0947314	-0.243643	0.0533403126503793	-0.116451
GSM8686565|Macrophage	-0.0624579	0.100298274456303	0.0886666927673347	-0.0771087	0.0604816479108777	0.0451344030876862	-0.0594865	-0.198007	-0.0363681	-0.156652	-0.0973771
GSM8686566|Macrophage	-0.0627157	0.121204867451813	0.208277895692297	-0.148592	-0.0538421	0.0827101325505056	0.115393268402785	0.104834408000927	0.259771108734042	0.258007642514396	-0.10976
GSM8686567|Macrophage	-0.0293682	0.0816727775558253	0.133876351449825	-0.0706741	0.0239604988750434	0.188150370541819	0.0739860708715853	-0.143388	0.0677001860059269	-0.0945478	-0.103212
GSM8686568|Macrophage	0.132804903035896	0.147899669642308	0.0974301849386102	-0.125415	-0.0659041	0.0548662029287906	-0.151649	-0.0224871	-0.0149956	0.107418454861147	-0.118625
GSM8686569|Macrophage	0.206166512171509	0.16096277211681	-0.0398163	-0.138573	-0.306542	-0.243976	-0.385721	-0.171618	-0.271074	-0.0669006	-0.119559
GSM8686570|Macrophage	-0.161956	0.0905244736581644	0.0759521084810499	-0.0920523	-0.159714	-0.111172	-0.159747	0.119242897709057	0.052844981193364	0.233378645741329	-0.109206
GSM8686571|Macrophage	0.0944571430701266	0.0476042924128729	0.0189751670150643	-0.0302723	-0.117287	0.0292433949039456	-0.143117	-0.0953295	-0.132316	-0.00629178	-0.101017
GSM8686572|Macrophage	0.220306270791163	0.108939351675546	0.0916454579262905	-0.0911511	0.00519242479656603	0.0917853976372347	-0.067788	-0.164373	-0.0273084	-0.107459	-0.103779
GSM8686573|Macrophage	0.116862777462512	0.0889095589336566	0.162471194367575	-0.0861743	0.202448005243876	0.111228524716511	0.151282891472449	-0.0633565	0.208591996336276	-0.0266696	-0.10551
GSM8686574|Macrophage	0.0275564404078914	0.0962840259051493	0.105037422981862	-0.0658534	0.143298971253266	0.0999169756647044	0.0211130620593365	-0.106499	0.0747460208404251	-0.0928551	-0.106988
GSM8686575|Macrophage	0.0348511790212581	0.137923427206202	0.154056642319137	-0.142404	0.0722480861581997	-0.00995611	0.054934777543339	-0.173564	0.133308730044812	-0.144372	-0.108841
GSM8686576|Macrophage	0.0506341417123432	0.0562592311648491	0.0057963151304047	-0.0377662	0.0673466057934949	-0.110052	-0.112745	-0.147413	-0.074503	-0.103719	-0.109526
GSM8686577|Macrophage	0.0516078645719691	0.0903430842854834	0.0441672185315726	-0.0872755	0.0913734547947742	0.123825626507082	-0.186882	-0.218231	-0.135887	-0.206907	-0.0833833
GSM8686578|Macrophage	0.205035586321954	0.111108084724587	0.11960646842978	-0.103186	0.0579020224502749	0.0193988255440612	0.0122315376533303	-0.064745	0.0916194014762211	0.0363411814833777	-0.117328
GSM8686579|Macrophage	-0.0240018	0.104110918956684	0.0384290988805386	-0.126503	-0.00974078	-0.118625	-0.106355	-0.169527	-0.0902466	-0.0996607	-0.120264
GSM8686580|Macrophage	0.0526565518973976	0.128390236996961	0.094161188269913	-0.13233	0.162087837656474	0.07480443287914	-0.0915457	-0.20026	-0.0468921	-0.099773	-0.121733
GSM8686581|Macrophage	-0.016487	0.126667187136056	0.210728241742619	-0.127496	0.23076286316335	0.177279942571305	0.106968731099323	-0.0601869	0.215627379885467	0.0436600737598734	-0.109045
GSM8686582|Macrophage	0.187583309221739	0.108300130146316	0.063671916381644	-0.114265	-0.0736315	-0.0345552	-0.0263614	-0.0971916	0.0144164385602933	-0.00397788	-0.108392
GSM8686583|Macrophage	0.205927560513889	0.123423364720277	-0.0173544	-0.13348	-0.298918	-0.182719	-0.156209	-0.237048	-0.159025	-0.152424	-0.109171

## Sheet: Table S5(MEs_Epithelial)
Table S5：MEs in the Epithelial Cell
	MEturquoise	MEgreen	MEyellow	MEblue	MEbrown	MEblack	MEred	MEgrey
GSM3660641|Epithelial_cells	-0.0287589	-0.0984959	-0.109642	-0.173754	-0.295828	-0.204456	-0.292948	-0.113895
GSM3660642|Epithelial_cells	0.183543000109247	0.0441346052655652	-0.0672178	-0.184742	-0.240017	0.0856731147147347	-0.0841499	-0.210171
GSM3660643|Epithelial_cells	0.168093962535394	-0.107645	-0.206394	-0.244991	-0.277318	0.0825655633331323	-0.12796	-0.223916
GSM3660644|Epithelial_cells	0.226270604183932	0.143967675135429	0.0172153663589369	-0.167699	-0.179731	0.151842111834788	-0.0111901	-0.215676
GSM3660645|Epithelial_cells	0.220970984157418	-0.00445326	-0.183129	-0.268648	-0.188756	0.16058702694118	0.0124043000478335	-0.202165
GSM3660646|Epithelial_cells	0.219523690545311	0.0717091358529963	-0.0947955	-0.202403	-0.177204	0.157192421578775	-0.0128656	-0.210938
GSM3660647|Epithelial_cells	0.21993792988933	0.0809675108420498	-0.0787076	-0.204637	-0.182609	0.135979601796283	-0.0427287	-0.208587
GSM3660648|Epithelial_cells	0.230436102292549	0.178924898200277	0.0440976370180461	-0.153752	-0.1721	0.115649077125826	-0.0394651	-0.20758
GSM3660651|Epithelial_cells	0.177555143200392	0.129801462405698	-0.0325673	-0.159786	-0.184597	-0.00163702	-0.157406	-0.188311
GSM3660652|Epithelial_cells	0.205083758441314	0.150988597702299	0.00313153092481006	-0.170303	-0.16208	0.104556020871248	-0.0468717	-0.198036
GSM3660653|Epithelial_cells	0.1987038583759	0.229860100397559	0.0839522917304608	-0.117995	-0.188066	-0.0197269	-0.167944	-0.207428
GSM3660654|Epithelial_cells	0.215241321830698	0.306656682591094	0.217122269825336	-0.0536568	-0.170145	-0.245002	-0.320534	-0.212031
GSM3660655|Epithelial_cells	0.220589729627741	0.0976083706032385	-0.0389421	-0.213741	-0.19139	0.146158398402853	-0.015688	-0.201915
GSM3660656|Epithelial_cells	0.214676593171237	0.295223328383323	0.192970989752438	-0.0667826	-0.164165	-0.270524	-0.30673	-0.208975
GSM3660657|Epithelial_cells	0.199630005167182	0.245400671129038	0.121609239371293	-0.105319	-0.16248	-0.239639	-0.294958	-0.196966
GSM3660658|Epithelial_cells	0.194997758645344	0.13749977086457	-0.0194985	-0.166853	-0.179208	0.0900353204374276	-0.0516831	-0.185764
GSM8686555|Epithelial_cells	-0.0993635	0.0191394053075309	0.114107664838311	0.143257327536132	0.0915782016236183	-0.0581786	0.0252036561329762	0.104761888754913
GSM8686556|Epithelial_cells	-0.109791	-0.0380749	0.0437946755516679	0.116446961968805	0.121903681833144	0.087560656141477	0.143698170409475	0.11278304856151
GSM8686557|Epithelial_cells	-0.103816	0.0504369571340497	0.148389327459124	0.158236218582884	0.0870861074677722	-0.0548825	-0.00346634	0.0984919533356591
GSM8686558|Epithelial_cells	-0.101121	-0.00974706	0.0810133876204075	0.145926161060098	0.124713432354104	-0.153193	-0.0274522	0.111743390646775
GSM8686559|Epithelial_cells	-0.165576	0.0426554609441237	0.174256380204701	0.216675803158182	0.136098703708042	-0.24144	-0.101677	0.125864127347525
GSM8686560|Epithelial_cells	-0.169565	-0.0529789	0.069103337969903	0.147248040357202	0.14124724635955	-0.063525	0.0435768398676244	0.127153566767503
GSM8686561|Epithelial_cells	-0.125802	0.0319599531043587	0.141740862215806	0.189027191125939	0.113332420460069	-0.162345	-0.0618034	0.104690275929147
GSM8686562|Epithelial_cells	-0.144473	-0.0137276	0.0864245045037733	0.150293743450734	0.124231345740799	-0.0282796	0.0594264035910234	0.119080492121149
GSM8686563|Epithelial_cells	-0.122371	0.0713662743927726	0.162386639494605	0.180202395113303	0.09400764300022	-0.0846086	0.000615706627918263	0.112772111532646
GSM8686564|Epithelial_cells	-0.129302	0.0740021008725889	0.177324581731401	0.184267610447988	0.0816207195944964	-0.0750448	0.011372517730373	0.115851605113031
GSM8686565|Epithelial_cells	-0.0708434	-0.199457	-0.169971	-0.0321516	0.0872168823703643	0.174681967539614	0.216185791535994	0.102432006866033
GSM8686566|Epithelial_cells	-0.114774	-0.0373059	0.0608638609210295	0.146480316831927	0.143713415739005	-0.136444	-0.00302892	0.109180353882361
GSM8686567|Epithelial_cells	-0.0728584	-0.309031	-0.371612	-0.121781	0.0576705554060353	0.163704092068389	0.209890261057052	0.0964068313532502
GSM8686568|Epithelial_cells	-0.132545	0.0350307652540163	0.171793046291815	0.214406644114122	0.140509427989613	-0.164534	-0.0314755	0.109667266050218
GSM8686569|Epithelial_cells	-0.142794	0.0279420100951174	0.172658683215952	0.214753608016915	0.135271641586213	-0.14249	-0.0120877	0.112844341225733
GSM8686570|Epithelial_cells	-0.12314	0.0853333586546673	0.192827956588171	0.202359146583632	0.0814816150941176	-0.372667	-0.25362	0.102324431680651
GSM8686571|Epithelial_cells	-0.0417159	0.0493445789169137	0.0965045256375036	0.0987975197760328	0.0352947889030524	-0.0243264	-0.00269675	0.0902402269622246
GSM8686572|Epithelial_cells	-0.0965882	-0.203219	-0.176876	-0.0246425	0.10447237665077	0.129952499241669	0.197840023112325	0.109813203362275
GSM8686573|Epithelial_cells	-0.0905314	-0.143595	-0.0615953	0.0287151262235615	0.121813300461215	0.12504106456856	0.180262621087474	0.107589067704482
GSM8686574|Epithelial_cells	-0.0738107	-0.17467	-0.142592	-0.0152718	0.101379484282115	0.111154055555873	0.151680376520036	0.108166963186685
GSM8686575|Epithelial_cells	-0.123633	-0.337694	-0.359783	-0.080835	0.174679321381912	0.167512282042797	0.262828362520302	0.118638795230622
GSM8686576|Epithelial_cells	-0.0351384	0.0942198691747212	0.155650380966373	0.139817467799064	0.0330135602414934	-0.0149431	-0.00641089	0.0997563671283859
GSM8686577|Epithelial_cells	-0.0427257	-0.189647	-0.173722	-0.0223508	0.136174386359815	-0.170396	-0.0584097	0.0937284804196127
GSM8686578|Epithelial_cells	-0.117139	-0.0645692	0.0307175842522226	0.0920717367851221	0.129182247631795	0.148936320259353	0.186868623293229	0.122961476448062
GSM8686579|Epithelial_cells	-0.121162	-0.219355	-0.218664	-0.0288089	0.0742033889161372	0.181051019026512	0.218523357653279	0.119891871374051
GSM8686580|Epithelial_cells	-0.113119	-0.188722	-0.201597	-0.00704008	0.0908965980613904	0.158941588828721	0.195044580727369	0.116822856283831
GSM8686581|Epithelial_cells	-0.11091	-0.185603	-0.10074	0.0480360762094502	0.17313851328019	0.0532266144688572	0.127868936882745	0.11857318536529
GSM8686582|Epithelial_cells	-0.0797447	-0.0457362	0.0340866580183022	0.0896860147064708	0.0898510449317821	0.0913205443838991	0.139526233119593	0.108493161762756
GSM8686583|Epithelial_cells	-0.092142	-0.0704454	0.0143029849531384	0.081237889410728	0.0899108622547789	0.104961024904296	0.152433865196976	0.111629806285751

## Sheet: Table S5(MEs_Endothelial)
Table S5：MEs in the Endothelial Cell
	MEpurple	MEmagenta	MEgreen	MEyellow	MEbrown	MEblue	MEred	MEturquoise	MEblack	MEpink	MEgrey
GSM3660641|Endothelial_cells	-0.252008	-0.137615	-0.253677	-0.267671	-0.329582	-0.31915	-0.286277	0.128096444533697	-0.166838	-0.0216491	-0.24769
GSM3660642|Endothelial_cells	-0.125258	-0.138138	-0.200136	-0.209392	-0.218594	-0.229012	-0.230155	0.191087314589765	-0.102455	0.0594469087817311	-0.215075
GSM3660643|Endothelial_cells	-0.111765	-0.117977	-0.214238	-0.21401	-0.254585	-0.260701	-0.231573	0.177960180840344	-0.0919974	0.103837687471175	-0.22823
GSM3660644|Endothelial_cells	-0.0485258	-0.124216	-0.194563	-0.15548	-0.243246	-0.180945	-0.177448	0.192378381457215	-0.0491143	0.100383297039015	-0.206729
GSM3660645|Endothelial_cells	-0.0541116	-0.165742	-0.20369	-0.157037	-0.160576	-0.160552	-0.184101	0.212890450585552	-0.135262	0.00927460058311524	-0.1933
GSM3660646|Endothelial_cells	-0.0753217	-0.155603	-0.194198	-0.193963	-0.19999	-0.180779	-0.190736	0.210545560383306	-0.0785185	0.0469632189945057	-0.202143
GSM3660647|Endothelial_cells	-0.0865052	-0.144076	-0.190403	-0.185146	-0.201369	-0.207909	-0.207776	0.204537768691228	-0.0545922	0.0333401935399789	-0.210871
GSM3660648|Endothelial_cells	-0.0214951	-0.17907	-0.192061	-0.193692	-0.154431	-0.191135	-0.203029	0.229682917536361	-0.0451496	0.096006918150384	-0.20465
GSM3660651|Endothelial_cells	-0.0370774	-0.131503	-0.0971398	-0.148046	-0.168149	-0.172659	-0.172415	0.197960319649105	0.0238592217352134	0.135077474366082	-0.186515
GSM3660652|Endothelial_cells	0.0297839593424903	-0.113853	-0.116405	-0.151992	-0.184381	-0.177833	-0.177131	0.200427515080026	0.0284033166223143	0.114865564220233	-0.192264
GSM3660653|Endothelial_cells	0.00522320182744731	-0.138024	-0.128732	-0.140856	-0.1519	-0.170933	-0.188679	0.219116100331583	0.0312827539423011	0.132105777200365	-0.199391
GSM3660654|Endothelial_cells	0.155404833154148	-0.177895	-0.0756804	-0.0507261	-0.118464	-0.159029	-0.177473	0.203903414856803	0.274797600338034	0.320699243574515	-0.172783
GSM3660655|Endothelial_cells	-0.140973	-0.158209	-0.212494	-0.194424	-0.203328	-0.204966	-0.215069	0.213354577398779	-0.0689871	0.0600836451845886	-0.213035
GSM3660656|Endothelial_cells	0.153046327725486	-0.153409	-0.0658135	-0.0540406	-0.113582	-0.160403	-0.173348	0.201931454470298	0.256917446410734	0.336319485050995	-0.175157
GSM3660657|Endothelial_cells	0.0678995321788814	-0.114069	-0.0833426	-0.059407	-0.115916	-0.17333	-0.170885	0.177025411648017	0.173245201010025	0.317514575213709	-0.168793
GSM3660658|Endothelial_cells	-0.0918708	-0.102074	-0.115032	-0.135797	-0.137526	-0.164866	-0.180414	0.200621811003516	-0.00260812	0.0839985398822136	-0.182753
GSM8686555|Endothelial_cells	-0.0709282	-0.064975	0.177444660577994	0.00895849736465823	0.115176892536298	0.0931873743656142	0.0984325529511957	-0.0929216	0.0792102462676237	-0.0650611	0.106721819548612
GSM8686556|Endothelial_cells	-0.0646703	0.0240577822556368	0.194458804463809	0.0331722340778508	0.10770973728905	0.114300936554574	0.115510720267655	-0.123407	0.0318112490584952	-0.0822606	0.11358341134451
GSM8686557|Endothelial_cells	-0.0293111	-0.0708761	0.15889075160572	0.0127968944685211	0.156021340307922	0.0693771326045808	0.0822428351786369	-0.0922167	0.117338321900854	0.0145929260512871	0.104938278454674
GSM8686558|Endothelial_cells	0.0139362440281742	0.120920758417563	0.218552469321324	0.153196784776969	0.0362794332874006	0.122311375952479	0.109354384990247	-0.10538	0.19159943649314	0.0547580829690524	0.1075139626063
GSM8686559|Endothelial_cells	0.0496595563218066	0.241722129612718	0.227618778284763	0.13634058949537	0.0597373900036737	0.134350053250993	0.13073714512801	-0.148129	0.270011050720816	0.171297201254951	0.113346179090207
GSM8686560|Endothelial_cells	0.0620949146195994	0.116038600050169	0.19187297800461	0.152712398065343	0.0594071555636966	0.142746377842097	0.138593231648415	-0.150671	0.126280516896694	0.0207554724488987	0.112659427561452
GSM8686561|Endothelial_cells	-0.0339864	0.0381577532817435	0.250150664924185	0.0718769816293622	0.00568028419167348	0.127215698064369	0.111640239187702	-0.125525	0.254385185294393	0.1194940971836	0.10889626425848
GSM8686562|Endothelial_cells	0.0667564013980912	0.228893781612784	0.180060545196329	0.132399561080566	0.0965780730913477	0.121670731746836	0.133398005161695	-0.138592	0.158469240910236	0.0653268958446215	0.113841137401452
GSM8686563|Endothelial_cells	-0.0515638	0.167862243500122	0.168002706906093	0.0308794116017172	0.147822530447196	0.0858962907098552	0.102828616581706	-0.108446	0.166380140681853	0.0892296708458133	0.113683984145556
GSM8686564|Endothelial_cells	0.00724181774863782	0.308939343003372	0.109118865538626	0.0651692333234201	0.183846726552328	0.0561585826122335	0.0908981916679424	-0.104425	0.106445037808257	0.0545522088764701	0.117593324182883
GSM8686565|Endothelial_cells	-0.196627	-0.146485	-0.0194278	-0.096155	0.156326700434295	0.0978101612307232	0.0914647251329131	-0.0786041	-0.260516	-0.294483	0.10669285497602
GSM8686566|Endothelial_cells	0.0540609818073922	0.0887207572136173	0.197548579725624	0.164504828624535	-0.0378341	0.159577593891296	0.128799677078423	-0.135691	0.155370793571907	0.0649074775190066	0.106432251091187
GSM8686567|Endothelial_cells	0.128637397508526	-0.016898	0.0151066276052448	0.128100768777359	0.142512920978458	0.0864438044510691	0.0995288524205178	-0.0750237	-0.132318	-0.232344	0.104417556140098
GSM8686568|Endothelial_cells	-0.196382	0.00776564660426065	0.12105319706624	-0.0240937	0.0881882913139273	0.145325610825506	0.126870147169269	-0.127731	0.0288298963700813	-0.0230138	0.112924881157763
GSM8686569|Endothelial_cells	-0.43543	-0.0279001	0.0748974558627824	-0.208376	0.114611985862533	0.128621753051664	0.115463233902583	-0.145796	-0.126987	-0.130371	0.11753214832159
GSM8686570|Endothelial_cells	-0.117705	0.221724748387246	0.219838001586606	0.00990580429322621	0.0844106513275943	0.0878697914873334	0.0968244956525757	-0.109483	0.255721920883515	0.147900273105616	0.108678902962765
GSM8686571|Endothelial_cells	-0.261902	0.0883992805075611	0.101080190717978	-0.120719	0.210723158368934	0.0256208751549638	0.0468362542942966	-0.049486	0.0155049848650731	-0.11815	0.110465513777746
GSM8686572|Endothelial_cells	-0.0798632	-0.0856839	-0.00138993	0.00834182829488269	0.136544650013452	0.102870794995247	0.0987657155986908	-0.0865377	-0.19118	-0.243331	0.103290514870612
GSM8686573|Endothelial_cells	0.249346750182961	-0.0973633	-0.0640057	0.207818758439595	0.110424524005919	0.109619981561242	0.108731445413861	-0.0994001	-0.145692	-0.138042	0.105477998124553
GSM8686574|Endothelial_cells	0.185304623939137	-0.0140491	0.000184155357477757	0.17083139446961	0.143710349678964	0.0976121698739329	0.106214130350795	-0.0740955	-0.120678	-0.156766	0.106626821408746
GSM8686575|Endothelial_cells	0.213768829898009	0.0176183929019162	0.00808078725183984	0.205798330287568	0.0720833335727198	0.148460076757479	0.142652659240744	-0.141792	-0.238285	-0.221227	0.11658319250771
GSM8686576|Endothelial_cells	0.293768039988195	0.331957709508012	-0.128206	0.193321396707968	0.200461910509992	0.0367168414461129	0.0662714905940796	-0.0459981	-0.152697	-0.117399	0.105488650672897
GSM8686577|Endothelial_cells	0.130743404856763	0.0179939780599007	-0.0529798	0.163828756093689	0.0047563653774944	0.139987066132345	0.11301769736242	-0.0761577	-0.193066	-0.191286	0.0990784039601157
GSM8686578|Endothelial_cells	0.224503660257877	0.0400107595749476	0.0345703439314131	0.201701616369419	0.146926306356582	0.108897343602645	0.118760038812916	-0.119159	-0.0192648	-0.0321859	0.118389698964692
GSM8686579|Endothelial_cells	0.248404460143035	0.321736191988072	-0.0706028	0.202832274324938	0.139129274087268	0.0765196157381336	0.110605869234963	-0.129848	-0.149828	-0.147016	0.115710945712683
GSM8686580|Endothelial_cells	0.0494670286928415	0.275752294650629	-0.013292	0.116354431573483	0.124683326294744	0.111833411221261	0.128206874117461	-0.127089	-0.200564	-0.218334	0.116274707505633
GSM8686581|Endothelial_cells	0.20001896973447	0.0417481030262989	-0.00593459	0.233809440251021	0.0230999522782325	0.160078908828872	0.145618198746732	-0.1295	-0.105323	-0.129251	0.108507960791023
GSM8686582|Endothelial_cells	0.0537112851631089	0.0250472785791173	0.133632781637132	0.117292469567895	0.051635335608928	0.112729468430896	0.103750946462457	-0.100216	0.104446408292847	-0.0356888	0.109169841951413
GSM8686583|Endothelial_cells	-0.0595013	0.0506356561781351	0.111281523879912	0.0390778622886666	0.0749645158408639	0.110392994032185	0.104490173859481	-0.120199	-0.0183892	-0.154872	0.114856797485912
