# Supplementary material
Source: Research Square preprint supplement (doi:10.21203/rs.3.rs-9392286/v1)
Supplement: Supplementary file 3 [file 25f6a413af82248d9038fd84.xlsx]

## Sheet: Table S8(train_Feature matrix)
Table S8: Feature Matrix for model testing(Training set)
	Endothelial_cells__SAMD11	Endothelial_cells__NOC2L	Endothelial_cells__KLHL17	Endothelial_cells__HES4	Endothelial_cells__ISG15	Endothelial_cells__AGRN	Endothelial_cells__C1ORF159	Endothelial_cells__TNFRSF4	Endothelial_cells__SDF4	Endothelial_cells__B3GALT6	Endothelial_cells__UBE2J2	Endothelial_cells__ACAP3	Endothelial_cells__PUSL1	Endothelial_cells__CPTP	Endothelial_cells__DVL1	Endothelial_cells__MXRA8	Endothelial_cells__AURKAIP1	Endothelial_cells__CCNL2	Endothelial_cells__ANKRD65	Endothelial_cells__VWA1	Endothelial_cells__ATAD3C	Endothelial_cells__ATAD3B	Endothelial_cells__ATAD3A	Endothelial_cells__SSU72	Endothelial_cells__MIB2	Endothelial_cells__MMP23B	Endothelial_cells__CDK11B	Endothelial_cells__SLC35E2B	Endothelial_cells__CDK11A	Endothelial_cells__NADK	Endothelial_cells__GNB1	Endothelial_cells__PRKCZ	Endothelial_cells__FAAP20	Endothelial_cells__SKI	Endothelial_cells__RER1	Endothelial_cells__PEX10	Endothelial_cells__PANK4	Endothelial_cells__TNFRSF14	Endothelial_cells__PRDM16	Endothelial_cells__ARHGEF16	Endothelial_cells__MEGF6	Endothelial_cells__TPRG1L	Endothelial_cells__WRAP73	Endothelial_cells__LRRC47	Endothelial_cells__CEP104	Endothelial_cells__DFFB	Endothelial_cells__C1ORF174	Endothelial_cells__NPHP4	Endothelial_cells__KCNAB2
GSM3660641	-0.19832	-0.710424	-0.0434453	0.0399807001584719	0.885738211149543	-1.14994	-0.750072	0.222708934325512	-1.20564	-1.78968	-2.16891	-1.32795	-1.69453	-1.37005	-1.5865	-1.33411	-0.923621	0.221424521824611	0.189729920396019	-0.920831	-0.232806	-1.60745	-1.82417	-1.50045	1.44775406694011	-1.24843	-0.49249	-1.20363	0.21738857807997	-1.03866	-2.30153	-2.16245	0.154640390539103	-1.73589	-2.13729	-1.78862	1.12488983431611	-2.4939	-0.105158	-0.182066	-1.13088	-0.763389	-0.701723	-1.80566	-1.51061	0.843457785602336	-0.129905	-1.14947	-1.3996
GSM3660642	-0.408011	1.2921719987544	-0.424841	0.0163004110641603	-0.767847	-1.31385	-0.957692	-0.0488603	-0.879053	0.471738895538204	0.330051353535807	1.44235157645922	0.380601968138984	-0.0794895	-0.130176	-1.50842	1.45219342095738	-0.273769	-1.20031	-1.08235	-0.505556	1.04533635074548	-0.655347	0.192185106025532	-0.0236791	-0.17904	0.697735779553513	-1.38665	0.786783232605675	0.354805099432236	-1.08125	0.339010794835169	0.631560397945687	0.242371053533404	0.184210368371025	0.403800550080431	-0.903124	-0.0740075	-0.406757	-0.428751	0.173928279634454	1.98522389182937	1.25791663156932	-0.0518934	0.204112882380326	0.532905250886054	0.0301080797774445	1.18788206576724	0.290733195606889
GSM3660643	-0.278319	0.979877373315646	-0.188951	-0.95412	-0.41573	0.693075069736782	-0.829281	0.119102970834509	-0.716488	-0.166986	-1.04758	-0.0427812	-0.205508	-1.45854	1.35678815534497	-1.40061	0.586301403251569	-2.0443	0.119614779439645	-0.98245	-0.336862	0.230734962869023	0.115747377907976	-0.129413	0.640242244521179	-0.0601553	0.0787898137198942	-1.27346	-2.04892	-2.05475	-0.652752	-0.707092	-0.0254727	-1.80692	-0.812648	0.53141732063601	-0.737286	-0.067438	-0.220221	1.34292346113728	-1.22036	0.182403327406531	-0.798062	-0.547236	0.727305849940277	-1.31332	-0.251648	-1.25297	0.0205237500925757
GSM3660644	-0.312639	-0.245565	-0.251374	-2.55038	-1.03214	-1.2393	-0.863262	0.0746549493018558	0.161962896625141	0.591124069616626	-0.676738	0.557639263447581	-0.244931	-1.49651	-0.0111201	-0.285073	-1.00414	-0.161046	1.29579381193352	-1.00889	1.40868261718297	0.598324734525935	-1.9387	-0.81392	0.118762344105772	-0.0916157	-0.609123	-1.30341	0.0937944212038262	-1.20001	0.109235970515011	-0.0271568	1.00302079155831	1.17478267530699	-1.16586	0.0828719803826943	0.978709192167354	-1.16302	-0.269584	-0.316554	0.996353063822163	-0.956484	0.438866760867993	0.0406918640396331	-1.61912	-1.36415	1.14912137057911	1.31127605004859	-0.665964
GSM3660645	-0.705102	0.605340396562998	-0.965203	0.611325181381359	-0.665827	0.359468290251941	-1.25185	1.87249571711786	-1.42626	0.0998450300247196	1.0040491245782	0.586447004845322	0.0393428267729913	0.766094264600022	0.824018832806665	-0.611312	-0.544933	0.467236980974545	-1.4607	0.24183877230215	-0.891989	0.225738477198474	0.677777451374499	0.694886806479786	1.5881605409581	0.135241921735591	-2.41369	0.11383745001484	0.125209211928425	0.409819821358963	1.19394654058958	1.4098784477927	-0.98635	-0.0214104	0.1991987756382	-2.28729	0.476865762616094	1.09069585769019	-0.834063	-0.778253	-1.6977	0.705300049951802	-0.033753	0.82175018263113	0.322217139531323	1.04066970149013	-0.422009	1.3488710146606	0.804047115206354
GSM3660646	-0.620229	-2.31723	-0.810833	0.17923095422319	0.905554999469397	-0.403911	0.828514394603196	-0.869609	0.0176542317376795	1.12784861391149	1.01523774112057	-1.74623	-0.598251	0.393679421986737	-0.395097	-0.00879974	-0.546693	-1.19384	-0.180053	-0.185707	-0.781594	-0.0938595	-0.226811	1.31188370300139	-0.340635	-1.63518	0.160010709591062	0.187914651343472	-0.930613	-0.240071	1.01704357539546	1.17268849798929	0.985252118057704	1.27593882499083	0.22739486518819	-0.219796	-1.17449	0.218763808789535	1.26754352330573	-0.678408	0.652324025493638	-1.47603	0.750331810658979	0.904142692467703	0.00268206368232096	0.218610182970744	1.80162528866767	0.0853389401111644	0.504349648601581
GSM3660647	-0.361966	-0.320207	-0.341092	0.625360378146605	0.90329938125942	-1.27786	0.450604419221215	0.418515181660338	1.53473710259915	-0.271695	0.408714570360718	0.926635020270555	0.917679783408221	-0.0285524	-0.0726967	0.205885096966451	1.52903560634465	-0.888592	-1.15996	-1.04688	-0.445664	1.08904941362034	0.454260242815725	0.648303736841761	0.0450908525695991	-1.39844	0.423502152559091	-0.145218	1.52842612936945	0.672803220278296	0.715002907970754	-0.0825363	-0.44898	0.56279203756335	0.103860695262075	1.00627729302764	-0.844246	-0.646133	1.63900386151335	-0.374582	-1.31392	0.753098237978242	-2.55619	-0.628439	0.946744105847386	-1.4372	0.801237210198419	-1.3612	1.22546054421626
GSM3660648	-0.679735	-0.324643	-0.919065	0.631071839560769	1.32138005087336	0.0498040808636723	0.76959648184107	1.03883016126069	1.62203925835224	-0.669473	-0.134161	-0.440749	0.914312312891498	1.14244348142937	1.2487084498188	0.553842207149399	0.29250565872734	0.36251870485027	0.328671928244195	1.02219618920178	1.7635817176541	-0.757885	1.09247900669126	1.28285639272024	-0.429509	0.544888356959204	1.61973518570035	0.998092928146878	0.15263390411487	0.445620837806003	0.456072391565038	0.387414365174073	-1.70329	0.988064514644113	-0.163563	0.693593652343181	1.32760034927766	0.88000952397949	-0.797578	-0.748411	0.585768968061924	-1.57654	-0.510817	0.846375685080632	0.645127941639582	0.13048233281526	-0.383405	0.836320353983496	0.709594892660281
GSM3660652	1.73900553207758	0.981512964327757	-0.186985	0.616263587065754	1.05074802629749	-0.135802	0.534495649412162	-0.425404	0.305225119140767	-1.88847	0.962363730660693	-1.40619	0.530817168061616	1.58770413863544	0.0330726318104104	0.626710556368109	0.220609445199552	-0.119205	0.68144067532525	0.571402667225777	1.45472986749737	-0.375772	-0.524326	-0.12541	-1.4137	0.913844417102568	0.0798925692214643	0.855185583299692	0.132067803116657	0.7923834369998	0.300283632918912	-0.705879	1.98785244945699	-0.0157778	0.425896625141162	-0.511995	1.02397692720137	0.125256515723993	-0.218666	-0.274907	0.320193548448484	0.184229014744762	-0.0261134	-1.88227	-1.58552	-1.31172	-1.86535	-1.25158	0.2768268594339
GSM3660653	2.3508689728668	0.0960344017557762	-0.870664	0.15362389837791	0.427754618798134	1.0062963173056	0.162322044318206	0.367015224521488	0.125994094371047	0.164909572589194	-0.0886997	0.950110678478763	-2.21695	0.823594007384818	0.888904164433765	1.55305405167687	-0.47123	1.52245479506867	0.351994881642689	0.849056843058593	-0.824381	1.18150923625185	0.729853318906322	-1.69593	-0.389765	2.03111332204089	1.10055854627494	0.527109237183985	0.793572192206594	1.01763266010286	-0.603106	0.0638211612790523	-0.450704	-0.917715	1.52748717317624	0.472408820197964	0.5433294432361	1.00733954752536	-0.759304	-0.717106	0.615532115547099	0.261307730228867	0.407980605901653	0.669044557910626	-0.635955	0.169892744329369	-1.46351	0.0427787742921084	-1.21871
GSM3660654	-0.67474	-0.7935	1.59329682608823	0.963091502437559	-1.58442	1.12953203641355	1.50362568759193	0.61005600737642	0.700722490100491	0.665503545007994	-0.631552	0.616547528300131	0.920049525053607	-0.374558	-0.463145	0.940933789591059	-0.452224	0.945094002195175	0.978430081334401	2.0861446653762	-0.852497	0.553454573033731	0.917872018691603	-0.510022	-0.422049	0.163073175709592	-0.978555	1.60005426540473	-0.989546	1.13454996679877	0.285245157407963	1.28752842394926	-1.15317	0.00554688153078834	0.126651206206605	0.904438364173264	-1.24419	-0.147613	2.10957131398263	2.12528903630283	1.41494559118065	0.224796447549335	0.00280936107892723	1.17747601207652	1.08712376709839	1.08563481087073	0.598070541985513	0.0148115267203129	-1.2538
GSM3660655	0.825243528375467	1.0757136503031	1.81825798829486	-1.16643	0.271885446635121	0.922491346752877	-1.09932	-1.60881	0.769522343270312	1.52912769620045	1.39315057152681	-0.313176	0.700476847709731	0.470201207432392	-2.02683	0.0487008388956517	1.3771187465286	-0.195486	-1.32569	-0.132427	-0.691619	-0.0281903	0.26481114366527	1.15992807205565	-1.82266	0.662843484125866	0.230583510967939	0.248288912193407	1.13017852679324	-0.941589	1.06308991966708	-1.0133	0.14354002867252	0.618108850411791	1.64142884625548	0.263043972024222	-1.08604	0.889701032394144	-0.6125	-0.597032	0.0139364932910392	-0.278274	0.833632240500289	-0.19076	0.767265168442167	0.3210546009569	0.513476113723504	0.17483566937937	1.62272428151505
GSM3660656	-0.676058	-0.319079	1.59089998058954	0.834683376726165	-1.30039	1.35998731242805	1.50232091953753	-1.7707	-1.01042	0.136201337973497	-0.365927	0.197342170438118	0.556891572233106	-0.376015	0.334075722766967	1.21920200208742	-1.51492	1.35751166380579	1.38103117833697	0.588887165346347	0.935975020355521	-2.06099	0.916551737171224	-0.514902	1.00198273316206	0.161865205405376	0.103051734252481	0.781884722470818	-0.990971	0.647465355786089	-0.501278	0.0380732683201721	-0.137893	-0.369883	-0.156768	0.449842013328374	0.514003871097156	0.380345283732206	-0.792289	1.62785605321899	0.589881422748283	0.754357020720212	0.935123111558325	0.646780828938367	0.648617910813231	1.08368317344511	-0.37781	0.0131065517715166	-0.916195
[truncated: 5,000 more columns]

## Sheet: Table S8(train_features_meta)
Table S8：Feature meta(Training set)
feature	celltype	gene	nonmiss_rate
Endothelial_cells__SAMD11	Endothelial_cells	SAMD11	1
Endothelial_cells__NOC2L	Endothelial_cells	NOC2L	1
Endothelial_cells__KLHL17	Endothelial_cells	KLHL17	1
Endothelial_cells__HES4	Endothelial_cells	HES4	1
Endothelial_cells__ISG15	Endothelial_cells	ISG15	1
Endothelial_cells__AGRN	Endothelial_cells	AGRN	1
Endothelial_cells__C1ORF159	Endothelial_cells	C1ORF159	1
Endothelial_cells__TNFRSF4	Endothelial_cells	TNFRSF4	1
Endothelial_cells__SDF4	Endothelial_cells	SDF4	1
Endothelial_cells__B3GALT6	Endothelial_cells	B3GALT6	1
Endothelial_cells__UBE2J2	Endothelial_cells	UBE2J2	1
Endothelial_cells__ACAP3	Endothelial_cells	ACAP3	1
Endothelial_cells__PUSL1	Endothelial_cells	PUSL1	1
Endothelial_cells__CPTP	Endothelial_cells	CPTP	1
Endothelial_cells__DVL1	Endothelial_cells	DVL1	1
Endothelial_cells__MXRA8	Endothelial_cells	MXRA8	1
Endothelial_cells__AURKAIP1	Endothelial_cells	AURKAIP1	1
Endothelial_cells__CCNL2	Endothelial_cells	CCNL2	1
Endothelial_cells__ANKRD65	Endothelial_cells	ANKRD65	1
Endothelial_cells__VWA1	Endothelial_cells	VWA1	1
Endothelial_cells__ATAD3C	Endothelial_cells	ATAD3C	1
Endothelial_cells__ATAD3B	Endothelial_cells	ATAD3B	1
Endothelial_cells__ATAD3A	Endothelial_cells	ATAD3A	1
Endothelial_cells__SSU72	Endothelial_cells	SSU72	1
Endothelial_cells__MIB2	Endothelial_cells	MIB2	1
Endothelial_cells__MMP23B	Endothelial_cells	MMP23B	1
Endothelial_cells__CDK11B	Endothelial_cells	CDK11B	1
Endothelial_cells__SLC35E2B	Endothelial_cells	SLC35E2B	1
Endothelial_cells__CDK11A	Endothelial_cells	CDK11A	1
Endothelial_cells__NADK	Endothelial_cells	NADK	1
Endothelial_cells__GNB1	Endothelial_cells	GNB1	1
Endothelial_cells__PRKCZ	Endothelial_cells	PRKCZ	1
Endothelial_cells__FAAP20	Endothelial_cells	FAAP20	1
Endothelial_cells__SKI	Endothelial_cells	SKI	1
Endothelial_cells__RER1	Endothelial_cells	RER1	1
Endothelial_cells__PEX10	Endothelial_cells	PEX10	1
Endothelial_cells__PANK4	Endothelial_cells	PANK4	1
Endothelial_cells__TNFRSF14	Endothelial_cells	TNFRSF14	1
Endothelial_cells__PRDM16	Endothelial_cells	PRDM16	1
Endothelial_cells__ARHGEF16	Endothelial_cells	ARHGEF16	1
Endothelial_cells__MEGF6	Endothelial_cells	MEGF6	1
Endothelial_cells__TPRG1L	Endothelial_cells	TPRG1L	1
Endothelial_cells__WRAP73	Endothelial_cells	WRAP73	1
Endothelial_cells__LRRC47	Endothelial_cells	LRRC47	1
Endothelial_cells__CEP104	Endothelial_cells	CEP104	1
Endothelial_cells__DFFB	Endothelial_cells	DFFB	1
Endothelial_cells__C1ORF174	Endothelial_cells	C1ORF174	1
Endothelial_cells__NPHP4	Endothelial_cells	NPHP4	1
Endothelial_cells__KCNAB2	Endothelial_cells	KCNAB2	1
Endothelial_cells__RNF207	Endothelial_cells	RNF207	1
Endothelial_cells__ICMT	Endothelial_cells	ICMT	1
Endothelial_cells__ACOT7	Endothelial_cells	ACOT7	1
Endothelial_cells__TNFRSF25	Endothelial_cells	TNFRSF25	1
Endothelial_cells__PLEKHG5	Endothelial_cells	PLEKHG5	1
Endothelial_cells__NOL9	Endothelial_cells	NOL9	1
Endothelial_cells__ZBTB48	Endothelial_cells	ZBTB48	1
Endothelial_cells__KLHL21	Endothelial_cells	KLHL21	1
Endothelial_cells__PHF13	Endothelial_cells	PHF13	1
Endothelial_cells__THAP3	Endothelial_cells	THAP3	1
Endothelial_cells__DNAJC11	Endothelial_cells	DNAJC11	1
Endothelial_cells__CAMTA1	Endothelial_cells	CAMTA1	1
Endothelial_cells__VAMP3	Endothelial_cells	VAMP3	1
Endothelial_cells__PER3	Endothelial_cells	PER3	1
Endothelial_cells__PARK7	Endothelial_cells	PARK7	1
Endothelial_cells__ERRFI1	Endothelial_cells	ERRFI1	1
Endothelial_cells__RERE	Endothelial_cells	RERE	1
Endothelial_cells__ENO1	Endothelial_cells	ENO1	1
Endothelial_cells__GPR157	Endothelial_cells	GPR157	1
Endothelial_cells__H6PD	Endothelial_cells	H6PD	1
Endothelial_cells__SPSB1	Endothelial_cells	SPSB1	1
Endothelial_cells__SLC25A33	Endothelial_cells	SLC25A33	1
Endothelial_cells__TMEM201	Endothelial_cells	TMEM201	1
Endothelial_cells__PIK3CD	Endothelial_cells	PIK3CD	1
Endothelial_cells__CLSTN1	Endothelial_cells	CLSTN1	1
Endothelial_cells__CTNNBIP1	Endothelial_cells	CTNNBIP1	1
Endothelial_cells__LZIC	Endothelial_cells	LZIC	1
Endothelial_cells__NMNAT1	Endothelial_cells	NMNAT1	1
Endothelial_cells__RBP7	Endothelial_cells	RBP7	1
Endothelial_cells__UBE4B	Endothelial_cells	UBE4B	1
Endothelial_cells__KIF1B	Endothelial_cells	KIF1B	1
Endothelial_cells__PGD	Endothelial_cells	PGD	1
Endothelial_cells__DFFA	Endothelial_cells	DFFA	1
Endothelial_cells__PEX14	Endothelial_cells	PEX14	1
Endothelial_cells__CASZ1	Endothelial_cells	CASZ1	1
Endothelial_cells__TARDBP	Endothelial_cells	TARDBP	1
Endothelial_cells__SRM	Endothelial_cells	SRM	1
Endothelial_cells__EXOSC10	Endothelial_cells	EXOSC10	1
Endothelial_cells__MTOR	Endothelial_cells	MTOR	1
Endothelial_cells__UBIAD1	Endothelial_cells	UBIAD1	1
Endothelial_cells__FBXO44	Endothelial_cells	FBXO44	1
Endothelial_cells__FBXO6	Endothelial_cells	FBXO6	1
Endothelial_cells__MAD2L2	Endothelial_cells	MAD2L2	1
Endothelial_cells__AGTRAP	Endothelial_cells	AGTRAP	1
Endothelial_cells__MTHFR	Endothelial_cells	MTHFR	1
Endothelial_cells__CLCN6	Endothelial_cells	CLCN6	1
Endothelial_cells__KIAA2013	Endothelial_cells	KIAA2013	1
Endothelial_cells__PLOD1	Endothelial_cells	PLOD1	1
Endothelial_cells__MFN2	Endothelial_cells	MFN2	1
Endothelial_cells__MIIP	Endothelial_cells	MIIP	1
Endothelial_cells__TNFRSF1B	Endothelial_cells	TNFRSF1B	1
Endothelial_cells__VPS13D	Endothelial_cells	VPS13D	1
Endothelial_cells__DHRS3	Endothelial_cells	DHRS3	1
Endothelial_cells__PDPN	Endothelial_cells	PDPN	1
Endothelial_cells__PRDM2	Endothelial_cells	PRDM2	1
Endothelial_cells__KAZN	Endothelial_cells	KAZN	1
Endothelial_cells__TMEM51	Endothelial_cells	TMEM51	1
Endothelial_cells__FHAD1	Endothelial_cells	FHAD1	1
Endothelial_cells__EFHD2	Endothelial_cells	EFHD2	1
Endothelial_cells__CASP9	Endothelial_cells	CASP9	1
Endothelial_cells__DNAJC16	Endothelial_cells	DNAJC16	1
Endothelial_cells__DDI2	Endothelial_cells	DDI2	1
Endothelial_cells__PLEKHM2	Endothelial_cells	PLEKHM2	1
Endothelial_cells__FBLIM1	Endothelial_cells	FBLIM1	1
Endothelial_cells__SPEN	Endothelial_cells	SPEN	1
Endothelial_cells__ZBTB17	Endothelial_cells	ZBTB17	1
Endothelial_cells__EPHA2	Endothelial_cells	EPHA2	1
Endothelial_cells__ARHGEF19	Endothelial_cells	ARHGEF19	1
Endothelial_cells__FBXO42	Endothelial_cells	FBXO42	1
Endothelial_cells__SZRD1	Endothelial_cells	SZRD1	1
Endothelial_cells__NECAP2	Endothelial_cells	NECAP2	1
Endothelial_cells__NBPF1	Endothelial_cells	NBPF1	1
Endothelial_cells__CROCC	Endothelial_cells	CROCC	1
Endothelial_cells__MFAP2	Endothelial_cells	MFAP2	1
Endothelial_cells__ATP13A2	Endothelial_cells	ATP13A2	1
Endothelial_cells__SDHB	Endothelial_cells	SDHB	1
Endothelial_cells__RCC2	Endothelial_cells	RCC2	1
Endothelial_cells__ARHGEF10L	Endothelial_cells	ARHGEF10L	1
Endothelial_cells__ALDH4A1	Endothelial_cells	ALDH4A1	1
Endothelial_cells__IFFO2	Endothelial_cells	IFFO2	1
Endothelial_cells__UBR4	Endothelial_cells	UBR4	1
Endothelial_cells__EMC1	Endothelial_cells	EMC1	1
Endothelial_cells__MRTO4	Endothelial_cells	MRTO4	1
Endothelial_cells__AKR7A2	Endothelial_cells	AKR7A2	1
Endothelial_cells__CAPZB	Endothelial_cells	CAPZB	1
Endothelial_cells__NBL1	Endothelial_cells	NBL1	1
Endothelial_cells__TMCO4	Endothelial_cells	TMCO4	1
Endothelial_cells__OTUD3	Endothelial_cells	OTUD3	1
Endothelial_cells__PLA2G2A	Endothelial_cells	PLA2G2A	1
Endothelial_cells__PLA2G5	Endothelial_cells	PLA2G5	1
Endothelial_cells__CAMK2N1	Endothelial_cells	CAMK2N1	1
Endothelial_cells__MUL1	Endothelial_cells	MUL1	1
Endothelial_cells__CDA	Endothelial_cells	CDA	1
Endothelial_cells__PINK1	Endothelial_cells	PINK1	1
Endothelial_cells__DDOST	Endothelial_cells	DDOST	1
Endothelial_cells__KIF17	Endothelial_cells	KIF17	1
Endothelial_cells__HP1BP3	Endothelial_cells	HP1BP3	1
Endothelial_cells__EIF4G3	Endothelial_cells	EIF4G3	1
Endothelial_cells__ECE1	Endothelial_cells	ECE1	1
Endothelial_cells__NBPF3	Endothelial_cells	NBPF3	1
Endothelial_cells__ALPL	Endothelial_cells	ALPL	1
Endothelial_cells__RAP1GAP	Endothelial_cells	RAP1GAP	1
Endothelial_cells__USP48	Endothelial_cells	USP48	1
Endothelial_cells__HSPG2	Endothelial_cells	HSPG2	1
Endothelial_cells__ZBTB40	Endothelial_cells	ZBTB40	1
Endothelial_cells__C1QB	Endothelial_cells	C1QB	1
Endothelial_cells__EPHB2	Endothelial_cells	EPHB2	1
Endothelial_cells__KDM1A	Endothelial_cells	KDM1A	1
Endothelial_cells__LUZP1	Endothelial_cells	LUZP1	1
Endothelial_cells__HNRNPR	Endothelial_cells	HNRNPR	1
Endothelial_cells__ZNF436	Endothelial_cells	ZNF436	1
Endothelial_cells__TCEA3	Endothelial_cells	TCEA3	1
Endothelial_cells__ASAP3	Endothelial_cells	ASAP3	1
Endothelial_cells__ID3	Endothelial_cells	ID3	1
Endothelial_cells__PITHD1	Endothelial_cells	PITHD1	1
Endothelial_cells__LYPLA2	Endothelial_cells	LYPLA2	1
Endothelial_cells__GALE	Endothelial_cells	GALE	1
Endothelial_cells__HMGCL	Endothelial_cells	HMGCL	1
Endothelial_cells__FUCA1	Endothelial_cells	FUCA1	1
Endothelial_cells__PNRC2	Endothelial_cells	PNRC2	1
Endothelial_cells__SRSF10	Endothelial_cells	SRSF10	1
Endothelial_cells__IFNLR1	Endothelial_cells	IFNLR1	1
Endothelial_cells__STPG1	Endothelial_cells	STPG1	1
Endothelial_cells__NIPAL3	Endothelial_cells	NIPAL3	1
Endothelial_cells__RCAN3	Endothelial_cells	RCAN3	1
Endothelial_cells__NCMAP	Endothelial_cells	NCMAP	1
Endothelial_cells__SRRM1	Endothelial_cells	SRRM1	1
Endothelial_cells__CLIC4	Endothelial_cells	CLIC4	1
Endothelial_cells__RUNX3	Endothelial_cells	RUNX3	1
Endothelial_cells__SYF2	Endothelial_cells	SYF2	1
Endothelial_cells__RSRP1	Endothelial_cells	RSRP1	1
Endothelial_cells__TMEM50A	Endothelial_cells	TMEM50A	1
Endothelial_cells__LDLRAP1	Endothelial_cells	LDLRAP1	1
Endothelial_cells__MAN1C1	Endothelial_cells	MAN1C1	1
Endothelial_cells__MTFR1L	Endothelial_cells	MTFR1L	1
Endothelial_cells__PAQR7	Endothelial_cells	PAQR7	1
Endothelial_cells__STMN1	Endothelial_cells	STMN1	1
Endothelial_cells__PAFAH2	Endothelial_cells	PAFAH2	1
Endothelial_cells__PDIK1L	Endothelial_cells	PDIK1L	1
Endothelial_cells__FAM110D	Endothelial_cells	FAM110D	1
Endothelial_cells__ZNF593	Endothelial_cells	ZNF593	1
Endothelial_cells__CNKSR1	Endothelial_cells	CNKSR1	1
Endothelial_cells__CEP85	Endothelial_cells	CEP85	1
Endothelial_cells__SH3BGRL3	Endothelial_cells	SH3BGRL3	1
Endothelial_cells__UBXN11	Endothelial_cells	UBXN11	1
Endothelial_cells__DHDDS	Endothelial_cells	DHDDS	1
Endothelial_cells__ARID1A	Endothelial_cells	ARID1A	1
Endothelial_cells__PIGV	Endothelial_cells	PIGV	1
Endothelial_cells__ZDHHC18	Endothelial_cells	ZDHHC18	1
Endothelial_cells__SFN	Endothelial_cells	SFN	1
Endothelial_cells__GPN2	Endothelial_cells	GPN2	1
Endothelial_cells__GPATCH3	Endothelial_cells	GPATCH3	1
Endothelial_cells__NUDC	Endothelial_cells	NUDC	1
Endothelial_cells__TRNP1	Endothelial_cells	TRNP1	1
Endothelial_cells__SLC9A1	Endothelial_cells	SLC9A1	1
Endothelial_cells__WDTC1	Endothelial_cells	WDTC1	1
Endothelial_cells__TMEM222	Endothelial_cells	TMEM222	1
Endothelial_cells__SYTL1	Endothelial_cells	SYTL1	1
Endothelial_cells__MAP3K6	Endothelial_cells	MAP3K6	1
Endothelial_cells__FCN3	Endothelial_cells	FCN3	1
Endothelial_cells__WASF2	Endothelial_cells	WASF2	1
Endothelial_cells__AHDC1	Endothelial_cells	AHDC1	1
Endothelial_cells__FGR	Endothelial_cells	FGR	1
Endothelial_cells__IFI6	Endothelial_cells	IFI6	1
Endothelial_cells__FAM76A	Endothelial_cells	FAM76A	1
Endothelial_cells__STX12	Endothelial_cells	STX12	1
Endothelial_cells__PPP1R8	Endothelial_cells	PPP1R8	1
Endothelial_cells__THEMIS2	Endothelial_cells	THEMIS2	1
Endothelial_cells__RPA2	Endothelial_cells	RPA2	1
Endothelial_cells__XKR8	Endothelial_cells	XKR8	1
Endothelial_cells__EYA3	Endothelial_cells	EYA3	1
Endothelial_cells__PTAFR	Endothelial_cells	PTAFR	1
Endothelial_cells__DNAJC8	Endothelial_cells	DNAJC8	1
Endothelial_cells__SESN2	Endothelial_cells	SESN2	1
Endothelial_cells__PHACTR4	Endothelial_cells	PHACTR4	1
Endothelial_cells__RCC1	Endothelial_cells	RCC1	1
Endothelial_cells__TRNAU1AP	Endothelial_cells	TRNAU1AP	1
Endothelial_cells__TAF12	Endothelial_cells	TAF12	1
Endothelial_cells__GMEB1	Endothelial_cells	GMEB1	1
Endothelial_cells__YTHDF2	Endothelial_cells	YTHDF2	1
Endothelial_cells__EPB41	Endothelial_cells	EPB41	1
Endothelial_cells__SRSF4	Endothelial_cells	SRSF4	1
Endothelial_cells__MECR	Endothelial_cells	MECR	1
Endothelial_cells__PTPRU	Endothelial_cells	PTPRU	1
Endothelial_cells__LAPTM5	Endothelial_cells	LAPTM5	1
Endothelial_cells__SDC3	Endothelial_cells	SDC3	1
Endothelial_cells__PUM1	Endothelial_cells	PUM1	1
Endothelial_cells__SNRNP40	Endothelial_cells	SNRNP40	1
Endothelial_cells__ZCCHC17	Endothelial_cells	ZCCHC17	1
Endothelial_cells__SERINC2	Endothelial_cells	SERINC2	1
Endothelial_cells__TINAGL1	Endothelial_cells	TINAGL1	1
Endothelial_cells__PEF1	Endothelial_cells	PEF1	1
Endothelial_cells__COL16A1	Endothelial_cells	COL16A1	1
Endothelial_cells__SPOCD1	Endothelial_cells	SPOCD1	1
Endothelial_cells__KHDRBS1	Endothelial_cells	KHDRBS1	1
Endothelial_cells__TMEM39B	Endothelial_cells	TMEM39B	1
Endothelial_cells__KPNA6	Endothelial_cells	KPNA6	1
Endothelial_cells__TXLNA	Endothelial_cells	TXLNA	1
Endothelial_cells__TMEM234	Endothelial_cells	TMEM234	1
Endothelial_cells__EIF3I	Endothelial_cells	EIF3I	1
Endothelial_cells__FAM167B	Endothelial_cells	FAM167B	1
Endothelial_cells__LCK	Endothelial_cells	LCK	1
Endothelial_cells__HDAC1	Endothelial_cells	HDAC1	1
Endothelial_cells__MARCKSL1	Endothelial_cells	MARCKSL1	1
Endothelial_cells__FAM229A	Endothelial_cells	FAM229A	1
Endothelial_cells__BSDC1	Endothelial_cells	BSDC1	1
Endothelial_cells__ZBTB8A	Endothelial_cells	ZBTB8A	1
Endothelial_cells__ZBTB8OS	Endothelial_cells	ZBTB8OS	1
Endothelial_cells__RBBP4	Endothelial_cells	RBBP4	1
Endothelial_cells__SYNC	Endothelial_cells	SYNC	1
Endothelial_cells__KIAA1522	Endothelial_cells	KIAA1522	1
Endothelial_cells__YARS	Endothelial_cells	YARS	1
Endothelial_cells__S100PBP	Endothelial_cells	S100PBP	1
Endothelial_cells__TMEM54	Endothelial_cells	TMEM54	1
Endothelial_cells__RNF19B	Endothelial_cells	RNF19B	1
Endothelial_cells__AZIN2	Endothelial_cells	AZIN2	1
Endothelial_cells__TRIM62	Endothelial_cells	TRIM62	1
Endothelial_cells__ZNF362	Endothelial_cells	ZNF362	1
Endothelial_cells__PHC2	Endothelial_cells	PHC2	1
Endothelial_cells__SMIM12	Endothelial_cells	SMIM12	1
Endothelial_cells__GJA4	Endothelial_cells	GJA4	1
Endothelial_cells__ZMYM6	Endothelial_cells	ZMYM6	1
Endothelial_cells__ZMYM1	Endothelial_cells	ZMYM1	1
Endothelial_cells__SFPQ	Endothelial_cells	SFPQ	1
Endothelial_cells__ZMYM4	Endothelial_cells	ZMYM4	1
Endothelial_cells__KIAA0319L	Endothelial_cells	KIAA0319L	1
Endothelial_cells__NCDN	Endothelial_cells	NCDN	1
Endothelial_cells__PSMB2	Endothelial_cells	PSMB2	1
Endothelial_cells__C1ORF216	Endothelial_cells	C1ORF216	1
Endothelial_cells__AGO4	Endothelial_cells	AGO4	1
Endothelial_cells__AGO1	Endothelial_cells	AGO1	1
Endothelial_cells__AGO3	Endothelial_cells	AGO3	1
Endothelial_cells__ADPRHL2	Endothelial_cells	ADPRHL2	1
Endothelial_cells__TRAPPC3	Endothelial_cells	TRAPPC3	1
Endothelial_cells__MAP7D1	Endothelial_cells	MAP7D1	1
Endothelial_cells__THRAP3	Endothelial_cells	THRAP3	1
Endothelial_cells__SH3D21	Endothelial_cells	SH3D21	1
Endothelial_cells__EVA1B	Endothelial_cells	EVA1B	1
Endothelial_cells__STK40	Endothelial_cells	STK40	1
Endothelial_cells__LSM10	Endothelial_cells	LSM10	1
Endothelial_cells__OSCP1	Endothelial_cells	OSCP1	1
Endothelial_cells__CSF3R	Endothelial_cells	CSF3R	1
Endothelial_cells__ZC3H12A	Endothelial_cells	ZC3H12A	1
Endothelial_cells__MEAF6	Endothelial_cells	MEAF6	1
Endothelial_cells__SNIP1	Endothelial_cells	SNIP1	1
Endothelial_cells__DNALI1	Endothelial_cells	DNALI1	1
Endothelial_cells__GNL2	Endothelial_cells	GNL2	1
Endothelial_cells__C1ORF109	Endothelial_cells	C1ORF109	1
Endothelial_cells__YRDC	Endothelial_cells	YRDC	1
Endothelial_cells__C1ORF122	Endothelial_cells	C1ORF122	1
Endothelial_cells__MTF1	Endothelial_cells	MTF1	1
Endothelial_cells__INPP5B	Endothelial_cells	INPP5B	1
Endothelial_cells__SF3A3	Endothelial_cells	SF3A3	1
Endothelial_cells__FHL3	Endothelial_cells	FHL3	1
Endothelial_cells__RRAGC	Endothelial_cells	RRAGC	1
Endothelial_cells__MYCBP	Endothelial_cells	MYCBP	1
Endothelial_cells__AKIRIN1	Endothelial_cells	AKIRIN1	1
Endothelial_cells__NDUFS5	Endothelial_cells	NDUFS5	1
Endothelial_cells__MACF1	Endothelial_cells	MACF1	1
Endothelial_cells__PABPC4	Endothelial_cells	PABPC4	1
Endothelial_cells__HEYL	Endothelial_cells	HEYL	1
Endothelial_cells__PPIE	Endothelial_cells	PPIE	1
Endothelial_cells__TRIT1	Endothelial_cells	TRIT1	1
Endothelial_cells__MFSD2A	Endothelial_cells	MFSD2A	1
Endothelial_cells__CAP1	Endothelial_cells	CAP1	1
Endothelial_cells__PPT1	Endothelial_cells	PPT1	1
Endothelial_cells__RLF	Endothelial_cells	RLF	1
Endothelial_cells__ZMPSTE24	Endothelial_cells	ZMPSTE24	1
Endothelial_cells__SMAP2	Endothelial_cells	SMAP2	1
Endothelial_cells__ZNF684	Endothelial_cells	ZNF684	1
Endothelial_cells__NFYC	Endothelial_cells	NFYC	1
Endothelial_cells__CITED4	Endothelial_cells	CITED4	1
Endothelial_cells__CTPS1	Endothelial_cells	CTPS1	1
Endothelial_cells__SCMH1	Endothelial_cells	SCMH1	1
Endothelial_cells__HIVEP3	Endothelial_cells	HIVEP3	1
Endothelial_cells__FOXJ3	Endothelial_cells	FOXJ3	1
Endothelial_cells__PPCS	Endothelial_cells	PPCS	1
Endothelial_cells__CCDC30	Endothelial_cells	CCDC30	1
Endothelial_cells__PPIH	Endothelial_cells	PPIH	1
Endothelial_cells__YBX1	Endothelial_cells	YBX1	1
Endothelial_cells__P3H1	Endothelial_cells	P3H1	1
Endothelial_cells__SVBP	Endothelial_cells	SVBP	1
Endothelial_cells__ERMAP	Endothelial_cells	ERMAP	1
Endothelial_cells__ZNF691	Endothelial_cells	ZNF691	1
Endothelial_cells__SLC2A1	Endothelial_cells	SLC2A1	1
Endothelial_cells__FAM183A	Endothelial_cells	FAM183A	1
Endothelial_cells__EBNA1BP2	Endothelial_cells	EBNA1BP2	1
Endothelial_cells__TMEM125	Endothelial_cells	TMEM125	1
Endothelial_cells__TIE1	Endothelial_cells	TIE1	1
Endothelial_cells__ELOVL1	Endothelial_cells	ELOVL1	1
Endothelial_cells__MED8	Endothelial_cells	MED8	1
Endothelial_cells__SZT2	Endothelial_cells	SZT2	1
Endothelial_cells__HYI	Endothelial_cells	HYI	1
Endothelial_cells__PTPRF	Endothelial_cells	PTPRF	1
Endothelial_cells__KDM4A	Endothelial_cells	KDM4A	1
Endothelial_cells__ST3GAL3	Endothelial_cells	ST3GAL3	1
Endothelial_cells__IPO13	Endothelial_cells	IPO13	1
Endothelial_cells__DPH2	Endothelial_cells	DPH2	1
Endothelial_cells__ATP6V0B	Endothelial_cells	ATP6V0B	1
Endothelial_cells__B4GALT2	Endothelial_cells	B4GALT2	1
Endothelial_cells__CCDC24	Endothelial_cells	CCDC24	1
Endothelial_cells__DMAP1	Endothelial_cells	DMAP1	1
Endothelial_cells__ERI3	Endothelial_cells	ERI3	1
Endothelial_cells__RNF220	Endothelial_cells	RNF220	1
Endothelial_cells__TMEM53	Endothelial_cells	TMEM53	1
Endothelial_cells__PLK3	Endothelial_cells	PLK3	1
Endothelial_cells__BTBD19	Endothelial_cells	BTBD19	1
Endothelial_cells__EIF2B3	Endothelial_cells	EIF2B3	1
Endothelial_cells__HECTD3	Endothelial_cells	HECTD3	1
Endothelial_cells__UROD	Endothelial_cells	UROD	1
Endothelial_cells__ZSWIM5	Endothelial_cells	ZSWIM5	1
Endothelial_cells__MUTYH	Endothelial_cells	MUTYH	1
Endothelial_cells__TOE1	Endothelial_cells	TOE1	1
Endothelial_cells__TESK2	Endothelial_cells	TESK2	1
Endothelial_cells__PRDX1	Endothelial_cells	PRDX1	1
Endothelial_cells__AKR1A1	Endothelial_cells	AKR1A1	1
Endothelial_cells__NASP	Endothelial_cells	NASP	1
Endothelial_cells__CCDC17	Endothelial_cells	CCDC17	1
Endothelial_cells__GPBP1L1	Endothelial_cells	GPBP1L1	1
Endothelial_cells__TMEM69	Endothelial_cells	TMEM69	1
Endothelial_cells__IPP	Endothelial_cells	IPP	1
Endothelial_cells__MAST2	Endothelial_cells	MAST2	1
Endothelial_cells__PIK3R3	Endothelial_cells	PIK3R3	1
Endothelial_cells__TSPAN1	Endothelial_cells	TSPAN1	1
Endothelial_cells__POMGNT1	Endothelial_cells	POMGNT1	1
Endothelial_cells__LURAP1	Endothelial_cells	LURAP1	1
Endothelial_cells__LRRC41	Endothelial_cells	LRRC41	1
Endothelial_cells__UQCRH	Endothelial_cells	UQCRH	1
Endothelial_cells__NSUN4	Endothelial_cells	NSUN4	1
Endothelial_cells__FAAH	Endothelial_cells	FAAH	1
Endothelial_cells__MKNK1	Endothelial_cells	MKNK1	1
Endothelial_cells__MOB3C	Endothelial_cells	MOB3C	1
Endothelial_cells__ATPAF1	Endothelial_cells	ATPAF1	1
Endothelial_cells__EFCAB14	Endothelial_cells	EFCAB14	1
Endothelial_cells__CYP4B1	Endothelial_cells	CYP4B1	1
Endothelial_cells__CYP4X1	Endothelial_cells	CYP4X1	1
Endothelial_cells__PDZK1IP1	Endothelial_cells	PDZK1IP1	1
Endothelial_cells__TAL1	Endothelial_cells	TAL1	1
Endothelial_cells__CMPK1	Endothelial_cells	CMPK1	1
Endothelial_cells__TRABD2B	Endothelial_cells	TRABD2B	1
Endothelial_cells__SPATA6	Endothelial_cells	SPATA6	1
Endothelial_cells__AGBL4	Endothelial_cells	AGBL4	1
Endothelial_cells__FAF1	Endothelial_cells	FAF1	1
Endothelial_cells__CDKN2C	Endothelial_cells	CDKN2C	1
Endothelial_cells__RNF11	Endothelial_cells	RNF11	1
Endothelial_cells__TTC39A	Endothelial_cells	TTC39A	1
Endothelial_cells__EPS15	Endothelial_cells	EPS15	1
Endothelial_cells__OSBPL9	Endothelial_cells	OSBPL9	1
Endothelial_cells__NRDC	Endothelial_cells	NRDC	1
Endothelial_cells__TXNDC12	Endothelial_cells	TXNDC12	1
Endothelial_cells__KTI12	Endothelial_cells	KTI12	1
Endothelial_cells__BTF3L4	Endothelial_cells	BTF3L4	1
Endothelial_cells__ZFYVE9	Endothelial_cells	ZFYVE9	1
Endothelial_cells__CC2D1B	Endothelial_cells	CC2D1B	1
Endothelial_cells__PRPF38A	Endothelial_cells	PRPF38A	1
Endothelial_cells__GPX7	Endothelial_cells	GPX7	1
Endothelial_cells__COA7	Endothelial_cells	COA7	1
Endothelial_cells__ZYG11B	Endothelial_cells	ZYG11B	1
Endothelial_cells__ECHDC2	Endothelial_cells	ECHDC2	1
Endothelial_cells__SCP2	Endothelial_cells	SCP2	1
Endothelial_cells__PODN	Endothelial_cells	PODN	1
Endothelial_cells__CPT2	Endothelial_cells	CPT2	1
Endothelial_cells__MAGOH	Endothelial_cells	MAGOH	1
Endothelial_cells__LRP8	Endothelial_cells	LRP8	1
Endothelial_cells__NDC1	Endothelial_cells	NDC1	1
Endothelial_cells__YIPF1	Endothelial_cells	YIPF1	1
Endothelial_cells__HSPB11	Endothelial_cells	HSPB11	1
Endothelial_cells__LRRC42	Endothelial_cells	LRRC42	1
Endothelial_cells__TMEM59	Endothelial_cells	TMEM59	1
Endothelial_cells__TCEANC2	Endothelial_cells	TCEANC2	1
Endothelial_cells__CYB5RL	Endothelial_cells	CYB5RL	1
Endothelial_cells__SSBP3	Endothelial_cells	SSBP3	1
Endothelial_cells__ACOT11	Endothelial_cells	ACOT11	1
Endothelial_cells__MROH7	Endothelial_cells	MROH7	1
Endothelial_cells__TTC4	Endothelial_cells	TTC4	1
Endothelial_cells__DHCR24	Endothelial_cells	DHCR24	1
Endothelial_cells__USP24	Endothelial_cells	USP24	1
Endothelial_cells__PLPP3	Endothelial_cells	PLPP3	1
Endothelial_cells__PRKAA2	Endothelial_cells	PRKAA2	1
Endothelial_cells__DAB1	Endothelial_cells	DAB1	1
Endothelial_cells__OMA1	Endothelial_cells	OMA1	1
Endothelial_cells__TACSTD2	Endothelial_cells	TACSTD2	1
Endothelial_cells__MYSM1	Endothelial_cells	MYSM1	1
Endothelial_cells__JUN	Endothelial_cells	JUN	1
Endothelial_cells__FGGY	Endothelial_cells	FGGY	1
Endothelial_cells__HOOK1	Endothelial_cells	HOOK1	1
Endothelial_cells__NFIA	Endothelial_cells	NFIA	1
Endothelial_cells__TM2D1	Endothelial_cells	TM2D1	1
Endothelial_cells__USP1	Endothelial_cells	USP1	1
Endothelial_cells__DOCK7	Endothelial_cells	DOCK7	1
Endothelial_cells__ATG4C	Endothelial_cells	ATG4C	1
Endothelial_cells__ALG6	Endothelial_cells	ALG6	1
Endothelial_cells__ITGB3BP	Endothelial_cells	ITGB3BP	1
Endothelial_cells__EFCAB7	Endothelial_cells	EFCAB7	1
Endothelial_cells__PGM1	Endothelial_cells	PGM1	1
Endothelial_cells__ROR1	Endothelial_cells	ROR1	1
Endothelial_cells__CACHD1	Endothelial_cells	CACHD1	1
Endothelial_cells__RAVER2	Endothelial_cells	RAVER2	1
Endothelial_cells__JAK1	Endothelial_cells	JAK1	1
Endothelial_cells__AK4	Endothelial_cells	AK4	1
Endothelial_cells__DNAJC6	Endothelial_cells	DNAJC6	1
Endothelial_cells__LEPROT	Endothelial_cells	LEPROT	1
Endothelial_cells__LEPR	Endothelial_cells	LEPR	1
Endothelial_cells__PDE4B	Endothelial_cells	PDE4B	1
Endothelial_cells__SGIP1	Endothelial_cells	SGIP1	1
Endothelial_cells__TCTEX1D1	Endothelial_cells	TCTEX1D1	1
Endothelial_cells__WDR78	Endothelial_cells	WDR78	1
Endothelial_cells__MIER1	Endothelial_cells	MIER1	1
Endothelial_cells__SLC35D1	Endothelial_cells	SLC35D1	1
Endothelial_cells__SERBP1	Endothelial_cells	SERBP1	1
Endothelial_cells__GADD45A	Endothelial_cells	GADD45A	1
Endothelial_cells__GNG12	Endothelial_cells	GNG12	1
Endothelial_cells__WLS	Endothelial_cells	WLS	1
Endothelial_cells__LRRC40	Endothelial_cells	LRRC40	1
Endothelial_cells__SRSF11	Endothelial_cells	SRSF11	1
Endothelial_cells__ANKRD13C	Endothelial_cells	ANKRD13C	1
Endothelial_cells__CTH	Endothelial_cells	CTH	1
Endothelial_cells__ZRANB2	Endothelial_cells	ZRANB2	1
Endothelial_cells__NEGR1	Endothelial_cells	NEGR1	1
Endothelial_cells__FPGT	Endothelial_cells	FPGT	1
Endothelial_cells__TNNI3K	Endothelial_cells	TNNI3K	1
Endothelial_cells__ERICH3	Endothelial_cells	ERICH3	1
Endothelial_cells__CRYZ	Endothelial_cells	CRYZ	1
Endothelial_cells__TYW3	Endothelial_cells	TYW3	1
Endothelial_cells__SLC44A5	Endothelial_cells	SLC44A5	1
Endothelial_cells__ACADM	Endothelial_cells	ACADM	1
Endothelial_cells__RABGGTB	Endothelial_cells	RABGGTB	1
Endothelial_cells__ST6GALNAC3	Endothelial_cells	ST6GALNAC3	1
Endothelial_cells__ST6GALNAC5	Endothelial_cells	ST6GALNAC5	1
Endothelial_cells__PIGK	Endothelial_cells	PIGK	1
Endothelial_cells__USP33	Endothelial_cells	USP33	1
Endothelial_cells__NEXN	Endothelial_cells	NEXN	1
Endothelial_cells__FUBP1	Endothelial_cells	FUBP1	1
Endothelial_cells__DNAJB4	Endothelial_cells	DNAJB4	1
Endothelial_cells__GIPC2	Endothelial_cells	GIPC2	1
Endothelial_cells__PTGFR	Endothelial_cells	PTGFR	1
Endothelial_cells__IFI44L	Endothelial_cells	IFI44L	1
Endothelial_cells__IFI44	Endothelial_cells	IFI44	1
Endothelial_cells__ADGRL4	Endothelial_cells	ADGRL4	1
Endothelial_cells__ADGRL2	Endothelial_cells	ADGRL2	1
Endothelial_cells__TTLL7	Endothelial_cells	TTLL7	1
Endothelial_cells__PRKACB	Endothelial_cells	PRKACB	1
Endothelial_cells__RPF1	Endothelial_cells	RPF1	1
Endothelial_cells__GNG5	Endothelial_cells	GNG5	1
Endothelial_cells__CTBS	Endothelial_cells	CTBS	1
Endothelial_cells__SSX2IP	Endothelial_cells	SSX2IP	1
Endothelial_cells__LPAR3	Endothelial_cells	LPAR3	1
Endothelial_cells__MCOLN2	Endothelial_cells	MCOLN2	1
Endothelial_cells__MCOLN3	Endothelial_cells	MCOLN3	1
Endothelial_cells__SYDE2	Endothelial_cells	SYDE2	1
Endothelial_cells__C1ORF52	Endothelial_cells	C1ORF52	1
Endothelial_cells__BCL10	Endothelial_cells	BCL10	1
Endothelial_cells__DDAH1	Endothelial_cells	DDAH1	1
Endothelial_cells__ZNHIT6	Endothelial_cells	ZNHIT6	1
Endothelial_cells__ODF2L	Endothelial_cells	ODF2L	1
Endothelial_cells__SH3GLB1	Endothelial_cells	SH3GLB1	1
Endothelial_cells__HS2ST1	Endothelial_cells	HS2ST1	1
Endothelial_cells__LMO4	Endothelial_cells	LMO4	1
Endothelial_cells__PKN2	Endothelial_cells	PKN2	1
Endothelial_cells__GTF2B	Endothelial_cells	GTF2B	1
Endothelial_cells__RBMXL1	Endothelial_cells	RBMXL1	1
Endothelial_cells__GBP3	Endothelial_cells	GBP3	1
Endothelial_cells__GBP1	Endothelial_cells	GBP1	1
Endothelial_cells__GBP2	Endothelial_cells	GBP2	1
Endothelial_cells__GBP4	Endothelial_cells	GBP4	1
Endothelial_cells__GBP5	Endothelial_cells	GBP5	1
Endothelial_cells__LRRC8B	Endothelial_cells	LRRC8B	1
Endothelial_cells__LRRC8C	Endothelial_cells	LRRC8C	1
Endothelial_cells__LRRC8D	Endothelial_cells	LRRC8D	1
Endothelial_cells__ZNF326	Endothelial_cells	ZNF326	1
Endothelial_cells__ZNF644	Endothelial_cells	ZNF644	1
Endothelial_cells__HFM1	Endothelial_cells	HFM1	1
Endothelial_cells__CDC7	Endothelial_cells	CDC7	1
Endothelial_cells__TGFBR3	Endothelial_cells	TGFBR3	1
Endothelial_cells__BTBD8	Endothelial_cells	BTBD8	1
Endothelial_cells__GLMN	Endothelial_cells	GLMN	1
Endothelial_cells__RPAP2	Endothelial_cells	RPAP2	1
Endothelial_cells__EVI5	Endothelial_cells	EVI5	1
Endothelial_cells__MTF2	Endothelial_cells	MTF2	1
Endothelial_cells__TMED5	Endothelial_cells	TMED5	1
Endothelial_cells__CCDC18	Endothelial_cells	CCDC18	1
Endothelial_cells__DR1	Endothelial_cells	DR1	1
Endothelial_cells__FNBP1L	Endothelial_cells	FNBP1L	1
Endothelial_cells__BCAR3	Endothelial_cells	BCAR3	1
Endothelial_cells__DNTTIP2	Endothelial_cells	DNTTIP2	1
Endothelial_cells__GCLM	Endothelial_cells	GCLM	1
Endothelial_cells__ARHGAP29	Endothelial_cells	ARHGAP29	1
Endothelial_cells__ABCD3	Endothelial_cells	ABCD3	1
Endothelial_cells__F3	Endothelial_cells	F3	1
Endothelial_cells__SLC44A3	Endothelial_cells	SLC44A3	1
Endothelial_cells__CNN3	Endothelial_cells	CNN3	1
Endothelial_cells__ALG14	Endothelial_cells	ALG14	1
Endothelial_cells__RWDD3	Endothelial_cells	RWDD3	1
Endothelial_cells__PTBP2	Endothelial_cells	PTBP2	1
Endothelial_cells__DPYD	Endothelial_cells	DPYD	1
Endothelial_cells__SNX7	Endothelial_cells	SNX7	1
Endothelial_cells__PALMD	Endothelial_cells	PALMD	1
Endothelial_cells__FRRS1	Endothelial_cells	FRRS1	1
Endothelial_cells__AGL	Endothelial_cells	AGL	1
Endothelial_cells__SLC35A3	Endothelial_cells	SLC35A3	1
Endothelial_cells__MFSD14A	Endothelial_cells	MFSD14A	1
Endothelial_cells__SASS6	Endothelial_cells	SASS6	1
Endothelial_cells__TRMT13	Endothelial_cells	TRMT13	1
Endothelial_cells__DBT	Endothelial_cells	DBT	1
Endothelial_cells__RTCA	Endothelial_cells	RTCA	1
Endothelial_cells__CDC14A	Endothelial_cells	CDC14A	1
Endothelial_cells__VCAM1	Endothelial_cells	VCAM1	1
Endothelial_cells__EXTL2	Endothelial_cells	EXTL2	1
Endothelial_cells__SLC30A7	Endothelial_cells	SLC30A7	1
Endothelial_cells__DPH5	Endothelial_cells	DPH5	1
Endothelial_cells__S1PR1	Endothelial_cells	S1PR1	1
Endothelial_cells__RNPC3	Endothelial_cells	RNPC3	1
Endothelial_cells__AMY2B	Endothelial_cells	AMY2B	1
Endothelial_cells__NTNG1	Endothelial_cells	NTNG1	1
Endothelial_cells__VAV3	Endothelial_cells	VAV3	1
Endothelial_cells__SLC25A24	Endothelial_cells	SLC25A24	1
Endothelial_cells__FAM102B	Endothelial_cells	FAM102B	1
Endothelial_cells__HENMT1	Endothelial_cells	HENMT1	1
Endothelial_cells__PRPF38B	Endothelial_cells	PRPF38B	1
Endothelial_cells__STXBP3	Endothelial_cells	STXBP3	1
Endothelial_cells__GPSM2	Endothelial_cells	GPSM2	1
Endothelial_cells__CLCC1	Endothelial_cells	CLCC1	1
Endothelial_cells__WDR47	Endothelial_cells	WDR47	1
Endothelial_cells__TAF13	Endothelial_cells	TAF13	1
Endothelial_cells__TMEM167B	Endothelial_cells	TMEM167B	1
Endothelial_cells__KIAA1324	Endothelial_cells	KIAA1324	1
Endothelial_cells__SARS	Endothelial_cells	SARS	1
Endothelial_cells__SORT1	Endothelial_cells	SORT1	1
Endothelial_cells__PSMA5	Endothelial_cells	PSMA5	1
Endothelial_cells__CYB561D1	Endothelial_cells	CYB561D1	1
Endothelial_cells__GNAI3	Endothelial_cells	GNAI3	1
Endothelial_cells__AMPD2	Endothelial_cells	AMPD2	1
Endothelial_cells__GSTM4	Endothelial_cells	GSTM4	1
Endothelial_cells__GSTM2	Endothelial_cells	GSTM2	1
Endothelial_cells__GSTM3	Endothelial_cells	GSTM3	1
Endothelial_cells__CSF1	Endothelial_cells	CSF1	1
Endothelial_cells__AHCYL1	Endothelial_cells	AHCYL1	1
Endothelial_cells__STRIP1	Endothelial_cells	STRIP1	1
Endothelial_cells__KCNC4	Endothelial_cells	KCNC4	1
Endothelial_cells__RBM15	Endothelial_cells	RBM15	1
Endothelial_cells__SLC16A4	Endothelial_cells	SLC16A4	1
Endothelial_cells__LAMTOR5	Endothelial_cells	LAMTOR5	1
Endothelial_cells__CD53	Endothelial_cells	CD53	1
Endothelial_cells__LRIF1	Endothelial_cells	LRIF1	1
Endothelial_cells__DRAM2	Endothelial_cells	DRAM2	1
Endothelial_cells__CEPT1	Endothelial_cells	CEPT1	1
Endothelial_cells__DENND2D	Endothelial_cells	DENND2D	1
Endothelial_cells__CHI3L2	Endothelial_cells	CHI3L2	1
Endothelial_cells__PIFO	Endothelial_cells	PIFO	1
Endothelial_cells__WDR77	Endothelial_cells	WDR77	1
Endothelial_cells__C1ORF162	Endothelial_cells	C1ORF162	1
Endothelial_cells__RAP1A	Endothelial_cells	RAP1A	1
Endothelial_cells__DDX20	Endothelial_cells	DDX20	1
Endothelial_cells__KCND3	Endothelial_cells	KCND3	1
Endothelial_cells__CTTNBP2NL	Endothelial_cells	CTTNBP2NL	1
Endothelial_cells__WNT2B	Endothelial_cells	WNT2B	1
Endothelial_cells__ST7L	Endothelial_cells	ST7L	1
Endothelial_cells__CAPZA1	Endothelial_cells	CAPZA1	1
Endothelial_cells__MOV10	Endothelial_cells	MOV10	1
Endothelial_cells__RHOC	Endothelial_cells	RHOC	1
Endothelial_cells__SLC16A1	Endothelial_cells	SLC16A1	1
Endothelial_cells__LRIG2	Endothelial_cells	LRIG2	1
Endothelial_cells__MAGI3	Endothelial_cells	MAGI3	1
Endothelial_cells__PHTF1	Endothelial_cells	PHTF1	1
Endothelial_cells__RSBN1	Endothelial_cells	RSBN1	1
Endothelial_cells__PTPN22	Endothelial_cells	PTPN22	1
Endothelial_cells__AP4B1	Endothelial_cells	AP4B1	1
Endothelial_cells__HIPK1	Endothelial_cells	HIPK1	1
Endothelial_cells__OLFML3	Endothelial_cells	OLFML3	1
Endothelial_cells__TRIM33	Endothelial_cells	TRIM33	1
Endothelial_cells__BCAS2	Endothelial_cells	BCAS2	1
Endothelial_cells__DENND2C	Endothelial_cells	DENND2C	1
Endothelial_cells__NRAS	Endothelial_cells	NRAS	1
Endothelial_cells__CSDE1	Endothelial_cells	CSDE1	1
Endothelial_cells__SIKE1	Endothelial_cells	SIKE1	1
Endothelial_cells__TSPAN2	Endothelial_cells	TSPAN2	1
Endothelial_cells__VANGL1	Endothelial_cells	VANGL1	1
Endothelial_cells__SLC22A15	Endothelial_cells	SLC22A15	1
Endothelial_cells__ATP1A1	Endothelial_cells	ATP1A1	1
Endothelial_cells__CD58	Endothelial_cells	CD58	1
Endothelial_cells__IGSF3	Endothelial_cells	IGSF3	1
Endothelial_cells__CD2	Endothelial_cells	CD2	1
Endothelial_cells__PTGFRN	Endothelial_cells	PTGFRN	1
Endothelial_cells__TTF2	Endothelial_cells	TTF2	1
Endothelial_cells__MAN1A2	Endothelial_cells	MAN1A2	1
Endothelial_cells__GDAP2	Endothelial_cells	GDAP2	1
Endothelial_cells__WDR3	Endothelial_cells	WDR3	1
Endothelial_cells__SPAG17	Endothelial_cells	SPAG17	1
Endothelial_cells__WARS2	Endothelial_cells	WARS2	1
Endothelial_cells__ZNF697	Endothelial_cells	ZNF697	1
Endothelial_cells__PHGDH	Endothelial_cells	PHGDH	1
Endothelial_cells__NOTCH2	Endothelial_cells	NOTCH2	1
Endothelial_cells__SEC22B	Endothelial_cells	SEC22B	1
Endothelial_cells__NBPF26	Endothelial_cells	NBPF26	1
Endothelial_cells__SRGAP2C	Endothelial_cells	SRGAP2C	1
Endothelial_cells__NBPF15	Endothelial_cells	NBPF15	1
Endothelial_cells__SRGAP2B	Endothelial_cells	SRGAP2B	1
Endothelial_cells__NBPF20	Endothelial_cells	NBPF20	1
Endothelial_cells__GPR89A	Endothelial_cells	GPR89A	1
Endothelial_cells__RNF115	Endothelial_cells	RNF115	1
Endothelial_cells__POLR3C	Endothelial_cells	POLR3C	1
Endothelial_cells__PIAS3	Endothelial_cells	PIAS3	1
Endothelial_cells__ITGA10	Endothelial_cells	ITGA10	1
Endothelial_cells__PEX11B	Endothelial_cells	PEX11B	1
Endothelial_cells__RBM8A	Endothelial_cells	RBM8A	1
Endothelial_cells__LIX1L	Endothelial_cells	LIX1L	1
Endothelial_cells__POLR3GL	Endothelial_cells	POLR3GL	1
Endothelial_cells__TXNIP	Endothelial_cells	TXNIP	1
Endothelial_cells__NBPF12	Endothelial_cells	NBPF12	1
Endothelial_cells__PRKAB2	Endothelial_cells	PRKAB2	1
Endothelial_cells__FMO5	Endothelial_cells	FMO5	1
Endothelial_cells__BCL9	Endothelial_cells	BCL9	1
Endothelial_cells__ACP6	Endothelial_cells	ACP6	1
Endothelial_cells__GJA5	Endothelial_cells	GJA5	1
Endothelial_cells__GPR89B	Endothelial_cells	GPR89B	1
Endothelial_cells__NBPF11	Endothelial_cells	NBPF11	1
Endothelial_cells__PDE4DIP	Endothelial_cells	PDE4DIP	1
Endothelial_cells__NBPF19	Endothelial_cells	NBPF19	1
Endothelial_cells__HIST2H2BE	Endothelial_cells	HIST2H2BE	1
Endothelial_cells__BOLA1	Endothelial_cells	BOLA1	1
Endothelial_cells__SF3B4	Endothelial_cells	SF3B4	1
Endothelial_cells__MTMR11	Endothelial_cells	MTMR11	1
Endothelial_cells__OTUD7B	Endothelial_cells	OTUD7B	1
Endothelial_cells__VPS45	Endothelial_cells	VPS45	1
Endothelial_cells__PLEKHO1	Endothelial_cells	PLEKHO1	1
Endothelial_cells__ANP32E	Endothelial_cells	ANP32E	1
Endothelial_cells__APH1A	Endothelial_cells	APH1A	1
Endothelial_cells__C1ORF54	Endothelial_cells	C1ORF54	1
Endothelial_cells__PRPF3	Endothelial_cells	PRPF3	1
Endothelial_cells__RPRD2	Endothelial_cells	RPRD2	1
Endothelial_cells__TARS2	Endothelial_cells	TARS2	1
Endothelial_cells__ECM1	Endothelial_cells	ECM1	1
Endothelial_cells__ADAMTSL4	Endothelial_cells	ADAMTSL4	1
Endothelial_cells__MCL1	Endothelial_cells	MCL1	1
Endothelial_cells__ENSA	Endothelial_cells	ENSA	1
Endothelial_cells__GOLPH3L	Endothelial_cells	GOLPH3L	1
Endothelial_cells__CTSS	Endothelial_cells	CTSS	1
Endothelial_cells__CTSK	Endothelial_cells	CTSK	1
Endothelial_cells__ARNT	Endothelial_cells	ARNT	1
Endothelial_cells__SETDB1	Endothelial_cells	SETDB1	1
Endothelial_cells__CERS2	Endothelial_cells	CERS2	1
Endothelial_cells__BNIPL	Endothelial_cells	BNIPL	1
Endothelial_cells__C1ORF56	Endothelial_cells	C1ORF56	1
Endothelial_cells__CDC42SE1	Endothelial_cells	CDC42SE1	1
Endothelial_cells__GABPB2	Endothelial_cells	GABPB2	1
Endothelial_cells__SEMA6C	Endothelial_cells	SEMA6C	1
Endothelial_cells__SCNM1	Endothelial_cells	SCNM1	1
Endothelial_cells__VPS72	Endothelial_cells	VPS72	1
Endothelial_cells__PIP5K1A	Endothelial_cells	PIP5K1A	1
Endothelial_cells__PSMD4	Endothelial_cells	PSMD4	1
Endothelial_cells__ZNF687	Endothelial_cells	ZNF687	1
Endothelial_cells__PI4KB	Endothelial_cells	PI4KB	1
Endothelial_cells__RFX5	Endothelial_cells	RFX5	1
Endothelial_cells__SELENBP1	Endothelial_cells	SELENBP1	1
Endothelial_cells__PSMB4	Endothelial_cells	PSMB4	1
Endothelial_cells__POGZ	Endothelial_cells	POGZ	1
Endothelial_cells__CGN	Endothelial_cells	CGN	1
Endothelial_cells__TUFT1	Endothelial_cells	TUFT1	1
Endothelial_cells__SNX27	Endothelial_cells	SNX27	1
Endothelial_cells__TDRKH	Endothelial_cells	TDRKH	1
Endothelial_cells__RORC	Endothelial_cells	RORC	1
Endothelial_cells__THEM4	Endothelial_cells	THEM4	1
Endothelial_cells__S100A10	Endothelial_cells	S100A10	1
Endothelial_cells__S100A11	Endothelial_cells	S100A11	1
Endothelial_cells__S100A6	Endothelial_cells	S100A6	1
Endothelial_cells__S100A4	Endothelial_cells	S100A4	1
Endothelial_cells__S100A2	Endothelial_cells	S100A2	1
Endothelial_cells__S100A16	Endothelial_cells	S100A16	1
Endothelial_cells__S100A14	Endothelial_cells	S100A14	1
Endothelial_cells__S100A13	Endothelial_cells	S100A13	1
Endothelial_cells__CHTOP	Endothelial_cells	CHTOP	1
Endothelial_cells__SNAPIN	Endothelial_cells	SNAPIN	1
Endothelial_cells__ILF2	Endothelial_cells	ILF2	1
Endothelial_cells__NPR1	Endothelial_cells	NPR1	1
Endothelial_cells__INTS3	Endothelial_cells	INTS3	1
Endothelial_cells__SLC27A3	Endothelial_cells	SLC27A3	1
Endothelial_cells__GATAD2B	Endothelial_cells	GATAD2B	1
Endothelial_cells__DENND4B	Endothelial_cells	DENND4B	1
Endothelial_cells__CRTC2	Endothelial_cells	CRTC2	1
Endothelial_cells__SLC39A1	Endothelial_cells	SLC39A1	1
Endothelial_cells__CREB3L4	Endothelial_cells	CREB3L4	1
Endothelial_cells__JTB	Endothelial_cells	JTB	1
Endothelial_cells__RAB13	Endothelial_cells	RAB13	1
Endothelial_cells__C1ORF43	Endothelial_cells	C1ORF43	1
Endothelial_cells__UBAP2L	Endothelial_cells	UBAP2L	1
Endothelial_cells__HAX1	Endothelial_cells	HAX1	1
Endothelial_cells__ATP8B2	Endothelial_cells	ATP8B2	1
Endothelial_cells__IL6R	Endothelial_cells	IL6R	1
Endothelial_cells__SHE	Endothelial_cells	SHE	1
Endothelial_cells__TDRD10	Endothelial_cells	TDRD10	1
Endothelial_cells__UBE2Q1	Endothelial_cells	UBE2Q1	1
Endothelial_cells__ADAR	Endothelial_cells	ADAR	1
Endothelial_cells__KCNN3	Endothelial_cells	KCNN3	1
Endothelial_cells__PMVK	Endothelial_cells	PMVK	1
Endothelial_cells__PBXIP1	Endothelial_cells	PBXIP1	1
Endothelial_cells__PYGO2	Endothelial_cells	PYGO2	1
Endothelial_cells__SHC1	Endothelial_cells	SHC1	1
Endothelial_cells__CKS1B	Endothelial_cells	CKS1B	1
Endothelial_cells__FLAD1	Endothelial_cells	FLAD1	1
Endothelial_cells__ZBTB7B	Endothelial_cells	ZBTB7B	1
Endothelial_cells__ADAM15	Endothelial_cells	ADAM15	1
Endothelial_cells__EFNA1	Endothelial_cells	EFNA1	1
Endothelial_cells__SLC50A1	Endothelial_cells	SLC50A1	1
Endothelial_cells__DPM3	Endothelial_cells	DPM3	1
Endothelial_cells__KRTCAP2	Endothelial_cells	KRTCAP2	1
Endothelial_cells__MUC1	Endothelial_cells	MUC1	1
Endothelial_cells__THBS3	Endothelial_cells	THBS3	1
Endothelial_cells__MTX1	Endothelial_cells	MTX1	1
Endothelial_cells__GBA	Endothelial_cells	GBA	1
Endothelial_cells__FAM189B	Endothelial_cells	FAM189B	1
Endothelial_cells__SCAMP3	Endothelial_cells	SCAMP3	1
Endothelial_cells__CLK2	Endothelial_cells	CLK2	1
Endothelial_cells__FDPS	Endothelial_cells	FDPS	1
Endothelial_cells__RUSC1	Endothelial_cells	RUSC1	1
Endothelial_cells__ASH1L	Endothelial_cells	ASH1L	1
Endothelial_cells__MSTO1	Endothelial_cells	MSTO1	1
Endothelial_cells__YY1AP1	Endothelial_cells	YY1AP1	1
Endothelial_cells__DAP3	Endothelial_cells	DAP3	1
Endothelial_cells__GON4L	Endothelial_cells	GON4L	1
Endothelial_cells__SYT11	Endothelial_cells	SYT11	1
Endothelial_cells__RIT1	Endothelial_cells	RIT1	1
Endothelial_cells__ARHGEF2	Endothelial_cells	ARHGEF2	1
Endothelial_cells__SSR2	Endothelial_cells	SSR2	1
Endothelial_cells__UBQLN4	Endothelial_cells	UBQLN4	1
Endothelial_cells__LAMTOR2	Endothelial_cells	LAMTOR2	1
Endothelial_cells__RAB25	Endothelial_cells	RAB25	1
Endothelial_cells__LMNA	Endothelial_cells	LMNA	1
Endothelial_cells__SEMA4A	Endothelial_cells	SEMA4A	1
Endothelial_cells__SLC25A44	Endothelial_cells	SLC25A44	1
Endothelial_cells__PMF1	Endothelial_cells	PMF1	1
Endothelial_cells__SMG5	Endothelial_cells	SMG5	1
Endothelial_cells__GLMP	Endothelial_cells	GLMP	1
Endothelial_cells__CCT3	Endothelial_cells	CCT3	1
Endothelial_cells__MEF2D	Endothelial_cells	MEF2D	1
Endothelial_cells__GPATCH4	Endothelial_cells	GPATCH4	1
Endothelial_cells__NES	Endothelial_cells	NES	1
Endothelial_cells__ISG20L2	Endothelial_cells	ISG20L2	1
Endothelial_cells__RRNAD1	Endothelial_cells	RRNAD1	1
Endothelial_cells__HDGF	Endothelial_cells	HDGF	1
Endothelial_cells__PRCC	Endothelial_cells	PRCC	1
Endothelial_cells__PEAR1	Endothelial_cells	PEAR1	1
Endothelial_cells__ARHGEF11	Endothelial_cells	ARHGEF11	1
Endothelial_cells__ETV3	Endothelial_cells	ETV3	1
Endothelial_cells__MNDA	Endothelial_cells	MNDA	1
Endothelial_cells__PYHIN1	Endothelial_cells	PYHIN1	1
Endothelial_cells__IFI16	Endothelial_cells	IFI16	1
Endothelial_cells__AIM2	Endothelial_cells	AIM2	1
Endothelial_cells__CADM3	Endothelial_cells	CADM3	1
Endothelial_cells__ACKR1	Endothelial_cells	ACKR1	1
Endothelial_cells__DUSP23	Endothelial_cells	DUSP23	1
Endothelial_cells__SLAMF8	Endothelial_cells	SLAMF8	1
Endothelial_cells__CFAP45	Endothelial_cells	CFAP45	1
Endothelial_cells__TAGLN2	Endothelial_cells	TAGLN2	1
Endothelial_cells__PIGM	Endothelial_cells	PIGM	1
Endothelial_cells__IGSF8	Endothelial_cells	IGSF8	1
Endothelial_cells__PEA15	Endothelial_cells	PEA15	1
Endothelial_cells__DCAF8	Endothelial_cells	DCAF8	1
Endothelial_cells__PEX19	Endothelial_cells	PEX19	1
Endothelial_cells__COPA	Endothelial_cells	COPA	1
Endothelial_cells__NCSTN	Endothelial_cells	NCSTN	1
Endothelial_cells__VANGL2	Endothelial_cells	VANGL2	1
Endothelial_cells__CD84	Endothelial_cells	CD84	1
Endothelial_cells__CD48	Endothelial_cells	CD48	1
Endothelial_cells__F11R	Endothelial_cells	F11R	1
Endothelial_cells__TSTD1	Endothelial_cells	TSTD1	1
Endothelial_cells__USF1	Endothelial_cells	USF1	1
Endothelial_cells__ARHGAP30	Endothelial_cells	ARHGAP30	1
Endothelial_cells__PFDN2	Endothelial_cells	PFDN2	1
Endothelial_cells__NIT1	Endothelial_cells	NIT1	1
Endothelial_cells__DEDD	Endothelial_cells	DEDD	1
Endothelial_cells__UFC1	Endothelial_cells	UFC1	1
Endothelial_cells__USP21	Endothelial_cells	USP21	1
Endothelial_cells__PPOX	Endothelial_cells	PPOX	1
Endothelial_cells__B4GALT3	Endothelial_cells	B4GALT3	1
Endothelial_cells__ADAMTS4	Endothelial_cells	ADAMTS4	1
Endothelial_cells__NDUFS2	Endothelial_cells	NDUFS2	1
Endothelial_cells__TOMM40L	Endothelial_cells	TOMM40L	1
Endothelial_cells__SDHC	Endothelial_cells	SDHC	1
Endothelial_cells__FCGR2A	Endothelial_cells	FCGR2A	1
Endothelial_cells__HSPA6	Endothelial_cells	HSPA6	1
Endothelial_cells__FCGR2B	Endothelial_cells	FCGR2B	1
Endothelial_cells__DUSP12	Endothelial_cells	DUSP12	1
Endothelial_cells__ATF6	Endothelial_cells	ATF6	1
Endothelial_cells__OLFML2B	Endothelial_cells	OLFML2B	1
Endothelial_cells__NOS1AP	Endothelial_cells	NOS1AP	1
Endothelial_cells__UHMK1	Endothelial_cells	UHMK1	1
Endothelial_cells__UAP1	Endothelial_cells	UAP1	1
Endothelial_cells__DDR2	Endothelial_cells	DDR2	1
Endothelial_cells__HSD17B7	Endothelial_cells	HSD17B7	1
Endothelial_cells__RGS5	Endothelial_cells	RGS5	1
Endothelial_cells__PBX1	Endothelial_cells	PBX1	1
Endothelial_cells__MGST3	Endothelial_cells	MGST3	1
Endothelial_cells__ALDH9A1	Endothelial_cells	ALDH9A1	1
Endothelial_cells__TMCO1	Endothelial_cells	TMCO1	1
Endothelial_cells__UCK2	Endothelial_cells	UCK2	1
Endothelial_cells__FAM78B	Endothelial_cells	FAM78B	1
Endothelial_cells__POGK	Endothelial_cells	POGK	1
Endothelial_cells__TADA1	Endothelial_cells	TADA1	1
Endothelial_cells__POU2F1	Endothelial_cells	POU2F1	1
Endothelial_cells__CD247	Endothelial_cells	CD247	1
Endothelial_cells__CREG1	Endothelial_cells	CREG1	1
Endothelial_cells__RCSD1	Endothelial_cells	RCSD1	1
Endothelial_cells__MPZL1	Endothelial_cells	MPZL1	1
Endothelial_cells__MPC2	Endothelial_cells	MPC2	1
Endothelial_cells__DCAF6	Endothelial_cells	DCAF6	1
Endothelial_cells__GPR161	Endothelial_cells	GPR161	1
Endothelial_cells__TIPRL	Endothelial_cells	TIPRL	1
Endothelial_cells__SFT2D2	Endothelial_cells	SFT2D2	1
Endothelial_cells__TBX19	Endothelial_cells	TBX19	1
Endothelial_cells__DPT	Endothelial_cells	DPT	1
Endothelial_cells__ATP1B1	Endothelial_cells	ATP1B1	1
Endothelial_cells__NME7	Endothelial_cells	NME7	1
Endothelial_cells__BLZF1	Endothelial_cells	BLZF1	1
Endothelial_cells__SLC19A2	Endothelial_cells	SLC19A2	1
Endothelial_cells__SELP	Endothelial_cells	SELP	1
Endothelial_cells__C1ORF112	Endothelial_cells	C1ORF112	1
Endothelial_cells__SELL	Endothelial_cells	SELL	1
Endothelial_cells__SELE	Endothelial_cells	SELE	1
Endothelial_cells__SCYL3	Endothelial_cells	SCYL3	1
Endothelial_cells__KIFAP3	Endothelial_cells	KIFAP3	1
Endothelial_cells__GORAB	Endothelial_cells	GORAB	1
Endothelial_cells__PRRX1	Endothelial_cells	PRRX1	1
Endothelial_cells__FMO3	Endothelial_cells	FMO3	1
Endothelial_cells__FMO2	Endothelial_cells	FMO2	1
Endothelial_cells__FMO4	Endothelial_cells	FMO4	1
Endothelial_cells__PRRC2C	Endothelial_cells	PRRC2C	1
Endothelial_cells__VAMP4	Endothelial_cells	VAMP4	1
Endothelial_cells__DNM3	Endothelial_cells	DNM3	1
Endothelial_cells__PIGC	Endothelial_cells	PIGC	1
Endothelial_cells__SUCO	Endothelial_cells	SUCO	1
Endothelial_cells__PRDX6	Endothelial_cells	PRDX6	1
Endothelial_cells__KLHL20	Endothelial_cells	KLHL20	1
Endothelial_cells__CENPL	Endothelial_cells	CENPL	1
Endothelial_cells__DARS2	Endothelial_cells	DARS2	1
Endothelial_cells__ZBTB37	Endothelial_cells	ZBTB37	1
Endothelial_cells__RC3H1	Endothelial_cells	RC3H1	1
Endothelial_cells__RABGAP1L	Endothelial_cells	RABGAP1L	1
Endothelial_cells__KIAA0040	Endothelial_cells	KIAA0040	1
Endothelial_cells__TNR	Endothelial_cells	TNR	1
Endothelial_cells__SEC16B	Endothelial_cells	SEC16B	1
Endothelial_cells__RASAL2	Endothelial_cells	RASAL2	1
Endothelial_cells__RALGPS2	Endothelial_cells	RALGPS2	1
Endothelial_cells__ANGPTL1	Endothelial_cells	ANGPTL1	1
Endothelial_cells__FAM20B	Endothelial_cells	FAM20B	1
Endothelial_cells__TOR3A	Endothelial_cells	TOR3A	1
Endothelial_cells__ABL2	Endothelial_cells	ABL2	1
Endothelial_cells__SOAT1	Endothelial_cells	SOAT1	1
Endothelial_cells__TOR1AIP2	Endothelial_cells	TOR1AIP2	1
Endothelial_cells__TOR1AIP1	Endothelial_cells	TOR1AIP1	1
Endothelial_cells__CEP350	Endothelial_cells	CEP350	1
Endothelial_cells__QSOX1	Endothelial_cells	QSOX1	1
Endothelial_cells__ACBD6	Endothelial_cells	ACBD6	1
Endothelial_cells__XPR1	Endothelial_cells	XPR1	1
Endothelial_cells__KIAA1614	Endothelial_cells	KIAA1614	1
Endothelial_cells__STX6	Endothelial_cells	STX6	1
Endothelial_cells__IER5	Endothelial_cells	IER5	1
Endothelial_cells__GLUL	Endothelial_cells	GLUL	1
Endothelial_cells__RNASEL	Endothelial_cells	RNASEL	1
Endothelial_cells__RGS16	Endothelial_cells	RGS16	1
Endothelial_cells__NPL	Endothelial_cells	NPL	1
Endothelial_cells__DHX9	Endothelial_cells	DHX9	1
Endothelial_cells__LAMC1	Endothelial_cells	LAMC1	1
Endothelial_cells__LAMC2	Endothelial_cells	LAMC2	1
Endothelial_cells__SMG7	Endothelial_cells	SMG7	1
Endothelial_cells__NCF2	Endothelial_cells	NCF2	1
Endothelial_cells__ARPC5	Endothelial_cells	ARPC5	1
Endothelial_cells__RGL1	Endothelial_cells	RGL1	1
Endothelial_cells__TSEN15	Endothelial_cells	TSEN15	1
Endothelial_cells__C1ORF21	Endothelial_cells	C1ORF21	1
Endothelial_cells__EDEM3	Endothelial_cells	EDEM3	1
Endothelial_cells__RNF2	Endothelial_cells	RNF2	1
Endothelial_cells__TRMT1L	Endothelial_cells	TRMT1L	1
Endothelial_cells__SWT1	Endothelial_cells	SWT1	1
Endothelial_cells__IVNS1ABP	Endothelial_cells	IVNS1ABP	1
Endothelial_cells__HMCN1	Endothelial_cells	HMCN1	1
Endothelial_cells__PRG4	Endothelial_cells	PRG4	1
Endothelial_cells__TPR	Endothelial_cells	TPR	1
Endothelial_cells__PTGS2	Endothelial_cells	PTGS2	1
Endothelial_cells__PLA2G4A	Endothelial_cells	PLA2G4A	1
Endothelial_cells__RGS1	Endothelial_cells	RGS1	1
Endothelial_cells__RGS2	Endothelial_cells	RGS2	1
Endothelial_cells__UCHL5	Endothelial_cells	UCHL5	1
Endothelial_cells__GLRX2	Endothelial_cells	GLRX2	1
Endothelial_cells__CDC73	Endothelial_cells	CDC73	1
Endothelial_cells__KCNT2	Endothelial_cells	KCNT2	1
Endothelial_cells__CFH	Endothelial_cells	CFH	1
Endothelial_cells__ZBTB41	Endothelial_cells	ZBTB41	1
Endothelial_cells__DENND1B	Endothelial_cells	DENND1B	1
Endothelial_cells__NEK7	Endothelial_cells	NEK7	1
Endothelial_cells__PTPRC	Endothelial_cells	PTPRC	1
Endothelial_cells__NR5A2	Endothelial_cells	NR5A2	1
Endothelial_cells__ZNF281	Endothelial_cells	ZNF281	1
Endothelial_cells__DDX59	Endothelial_cells	DDX59	1
Endothelial_cells__CAMSAP2	Endothelial_cells	CAMSAP2	1
Endothelial_cells__KIF21B	Endothelial_cells	KIF21B	1
Endothelial_cells__TMEM9	Endothelial_cells	TMEM9	1
Endothelial_cells__PKP1	Endothelial_cells	PKP1	1
Endothelial_cells__LAD1	Endothelial_cells	LAD1	1
Endothelial_cells__PHLDA3	Endothelial_cells	PHLDA3	1
Endothelial_cells__CSRP1	Endothelial_cells	CSRP1	1
Endothelial_cells__NAV1	Endothelial_cells	NAV1	1
Endothelial_cells__IPO9	Endothelial_cells	IPO9	1
Endothelial_cells__SHISA4	Endothelial_cells	SHISA4	1
Endothelial_cells__LMOD1	Endothelial_cells	LMOD1	1
Endothelial_cells__TIMM17A	Endothelial_cells	TIMM17A	1
Endothelial_cells__RNPEP	Endothelial_cells	RNPEP	1
Endothelial_cells__ELF3	Endothelial_cells	ELF3	1
Endothelial_cells__ARL8A	Endothelial_cells	ARL8A	1
Endothelial_cells__PTPN7	Endothelial_cells	PTPN7	1
Endothelial_cells__UBE2T	Endothelial_cells	UBE2T	1
Endothelial_cells__PPP1R12B	Endothelial_cells	PPP1R12B	1
Endothelial_cells__KDM5B	Endothelial_cells	KDM5B	1
Endothelial_cells__RABIF	Endothelial_cells	RABIF	1
Endothelial_cells__KLHL12	Endothelial_cells	KLHL12	1
Endothelial_cells__ADIPOR1	Endothelial_cells	ADIPOR1	1
Endothelial_cells__CYB5R1	Endothelial_cells	CYB5R1	1
Endothelial_cells__TMEM183A	Endothelial_cells	TMEM183A	1
Endothelial_cells__CHI3L1	Endothelial_cells	CHI3L1	1
Endothelial_cells__BTG2	Endothelial_cells	BTG2	1
Endothelial_cells__FMOD	Endothelial_cells	FMOD	1
Endothelial_cells__PRELP	Endothelial_cells	PRELP	1
Endothelial_cells__ATP2B4	Endothelial_cells	ATP2B4	1
Endothelial_cells__ZC3H11A	Endothelial_cells	ZC3H11A	1
Endothelial_cells__ZBED6	Endothelial_cells	ZBED6	1
Endothelial_cells__SNRPE	Endothelial_cells	SNRPE	1
Endothelial_cells__SOX13	Endothelial_cells	SOX13	1
Endothelial_cells__PLEKHA6	Endothelial_cells	PLEKHA6	1
Endothelial_cells__PPP1R15B	Endothelial_cells	PPP1R15B	1
Endothelial_cells__PIK3C2B	Endothelial_cells	PIK3C2B	1
Endothelial_cells__MDM4	Endothelial_cells	MDM4	1
Endothelial_cells__NFASC	Endothelial_cells	NFASC	1
Endothelial_cells__RBBP5	Endothelial_cells	RBBP5	1
Endothelial_cells__DSTYK	Endothelial_cells	DSTYK	1
Endothelial_cells__NUAK2	Endothelial_cells	NUAK2	1
Endothelial_cells__CDK18	Endothelial_cells	CDK18	1
Endothelial_cells__ELK4	Endothelial_cells	ELK4	1
Endothelial_cells__NUCKS1	Endothelial_cells	NUCKS1	1
Endothelial_cells__RAB29	Endothelial_cells	RAB29	1
Endothelial_cells__SLC41A1	Endothelial_cells	SLC41A1	1
Endothelial_cells__SLC26A9	Endothelial_cells	SLC26A9	1
Endothelial_cells__RAB7B	Endothelial_cells	RAB7B	1
Endothelial_cells__CTSE	Endothelial_cells	CTSE	1
Endothelial_cells__SRGAP2	Endothelial_cells	SRGAP2	1
Endothelial_cells__IKBKE	Endothelial_cells	IKBKE	1
Endothelial_cells__RASSF5	Endothelial_cells	RASSF5	1
Endothelial_cells__EIF2D	Endothelial_cells	EIF2D	1
Endothelial_cells__DYRK3	Endothelial_cells	DYRK3	1
Endothelial_cells__MAPKAPK2	Endothelial_cells	MAPKAPK2	1
Endothelial_cells__FCMR	Endothelial_cells	FCMR	1
Endothelial_cells__PIGR	Endothelial_cells	PIGR	1
Endothelial_cells__C1ORF116	Endothelial_cells	C1ORF116	1
Endothelial_cells__PFKFB2	Endothelial_cells	PFKFB2	1
Endothelial_cells__YOD1	Endothelial_cells	YOD1	1
Endothelial_cells__C4BPA	Endothelial_cells	C4BPA	1
Endothelial_cells__CD55	Endothelial_cells	CD55	1
Endothelial_cells__CR1	Endothelial_cells	CR1	1
Endothelial_cells__CD46	Endothelial_cells	CD46	1
Endothelial_cells__CD34	Endothelial_cells	CD34	1
Endothelial_cells__PLXNA2	Endothelial_cells	PLXNA2	1
Endothelial_cells__LAMB3	Endothelial_cells	LAMB3	1
Endothelial_cells__G0S2	Endothelial_cells	G0S2	1
Endothelial_cells__HSD11B1	Endothelial_cells	HSD11B1	1
Endothelial_cells__TRAF3IP3	Endothelial_cells	TRAF3IP3	1
Endothelial_cells__IRF6	Endothelial_cells	IRF6	1
Endothelial_cells__HHAT	Endothelial_cells	HHAT	1
Endothelial_cells__RCOR3	Endothelial_cells	RCOR3	1
Endothelial_cells__TRAF5	Endothelial_cells	TRAF5	1
Endothelial_cells__SLC30A1	Endothelial_cells	SLC30A1	1
Endothelial_cells__LPGAT1	Endothelial_cells	LPGAT1	1
Endothelial_cells__INTS7	Endothelial_cells	INTS7	1
Endothelial_cells__PPP2R5A	Endothelial_cells	PPP2R5A	1
Endothelial_cells__NENF	Endothelial_cells	NENF	1
Endothelial_cells__ATF3	Endothelial_cells	ATF3	1
Endothelial_cells__BATF3	Endothelial_cells	BATF3	1
Endothelial_cells__NSL1	Endothelial_cells	NSL1	1
Endothelial_cells__TATDN3	Endothelial_cells	TATDN3	1
Endothelial_cells__FLVCR1	Endothelial_cells	FLVCR1	1
Endothelial_cells__ANGEL2	Endothelial_cells	ANGEL2	1
Endothelial_cells__PROX1	Endothelial_cells	PROX1	1
Endothelial_cells__SMYD2	Endothelial_cells	SMYD2	1
Endothelial_cells__PTPN14	Endothelial_cells	PTPN14	1
Endothelial_cells__CENPF	Endothelial_cells	CENPF	1
Endothelial_cells__KCTD3	Endothelial_cells	KCTD3	1
Endothelial_cells__ESRRG	Endothelial_cells	ESRRG	1
Endothelial_cells__GPATCH2	Endothelial_cells	GPATCH2	1
Endothelial_cells__SPATA17	Endothelial_cells	SPATA17	1
Endothelial_cells__RRP15	Endothelial_cells	RRP15	1
Endothelial_cells__TGFB2	Endothelial_cells	TGFB2	1
Endothelial_cells__LYPLAL1	Endothelial_cells	LYPLAL1	1
Endothelial_cells__EPRS	Endothelial_cells	EPRS	1
Endothelial_cells__BPNT1	Endothelial_cells	BPNT1	1
Endothelial_cells__IARS2	Endothelial_cells	IARS2	1
Endothelial_cells__RAB3GAP2	Endothelial_cells	RAB3GAP2	1
Endothelial_cells__MARK1	Endothelial_cells	MARK1	1
Endothelial_cells__C1ORF115	Endothelial_cells	C1ORF115	1
Endothelial_cells__MARC2	Endothelial_cells	MARC2	1
Endothelial_cells__MARC1	Endothelial_cells	MARC1	1
Endothelial_cells__HLX	Endothelial_cells	HLX	1
Endothelial_cells__DUSP10	Endothelial_cells	DUSP10	1
Endothelial_cells__TAF1A	Endothelial_cells	TAF1A	1
Endothelial_cells__MIA3	Endothelial_cells	MIA3	1
Endothelial_cells__AIDA	Endothelial_cells	AIDA	1
Endothelial_cells__BROX	Endothelial_cells	BROX	1
Endothelial_cells__DISP1	Endothelial_cells	DISP1	1
Endothelial_cells__TLR5	Endothelial_cells	TLR5	1
Endothelial_cells__SUSD4	Endothelial_cells	SUSD4	1
Endothelial_cells__CAPN8	Endothelial_cells	CAPN8	1
Endothelial_cells__CAPN2	Endothelial_cells	CAPN2	1
Endothelial_cells__TP53BP2	Endothelial_cells	TP53BP2	1
Endothelial_cells__FBXO28	Endothelial_cells	FBXO28	1
Endothelial_cells__DEGS1	Endothelial_cells	DEGS1	1
Endothelial_cells__NVL	Endothelial_cells	NVL	1
Endothelial_cells__CNIH4	Endothelial_cells	CNIH4	1
Endothelial_cells__WDR26	Endothelial_cells	WDR26	1
Endothelial_cells__CNIH3	Endothelial_cells	CNIH3	1
Endothelial_cells__DNAH14	Endothelial_cells	DNAH14	1
Endothelial_cells__LBR	Endothelial_cells	LBR	1
Endothelial_cells__ENAH	Endothelial_cells	ENAH	1
Endothelial_cells__SRP9	Endothelial_cells	SRP9	1
Endothelial_cells__EPHX1	Endothelial_cells	EPHX1	1
Endothelial_cells__TMEM63A	Endothelial_cells	TMEM63A	1
Endothelial_cells__PYCR2	Endothelial_cells	PYCR2	1
Endothelial_cells__SDE2	Endothelial_cells	SDE2	1
Endothelial_cells__H3F3A	Endothelial_cells	H3F3A	1
Endothelial_cells__ACBD3	Endothelial_cells	ACBD3	1
Endothelial_cells__LIN9	Endothelial_cells	LIN9	1
Endothelial_cells__PARP1	Endothelial_cells	PARP1	1
Endothelial_cells__ITPKB	Endothelial_cells	ITPKB	1
Endothelial_cells__PSEN2	Endothelial_cells	PSEN2	1
Endothelial_cells__CDC42BPA	Endothelial_cells	CDC42BPA	1
Endothelial_cells__ZNF678	Endothelial_cells	ZNF678	1
Endothelial_cells__SNAP47	Endothelial_cells	SNAP47	1
Endothelial_cells__JMJD4	Endothelial_cells	JMJD4	1
Endothelial_cells__WNT9A	Endothelial_cells	WNT9A	1
Endothelial_cells__ARF1	Endothelial_cells	ARF1	1
Endothelial_cells__C1ORF35	Endothelial_cells	C1ORF35	1
Endothelial_cells__GUK1	Endothelial_cells	GUK1	1
Endothelial_cells__IBA57	Endothelial_cells	IBA57	1
Endothelial_cells__OBSCN	Endothelial_cells	OBSCN	1
Endothelial_cells__TRIM11	Endothelial_cells	TRIM11	1
Endothelial_cells__RNF187	Endothelial_cells	RNF187	1
Endothelial_cells__RHOU	Endothelial_cells	RHOU	1
Endothelial_cells__RAB4A	Endothelial_cells	RAB4A	1
Endothelial_cells__CCSAP	Endothelial_cells	CCSAP	1
Endothelial_cells__NUP133	Endothelial_cells	NUP133	1
Endothelial_cells__ABCB10	Endothelial_cells	ABCB10	1
Endothelial_cells__TAF5L	Endothelial_cells	TAF5L	1
Endothelial_cells__URB2	Endothelial_cells	URB2	1
Endothelial_cells__GALNT2	Endothelial_cells	GALNT2	1
Endothelial_cells__COG2	Endothelial_cells	COG2	1
Endothelial_cells__CAPN9	Endothelial_cells	CAPN9	1
Endothelial_cells__C1ORF198	Endothelial_cells	C1ORF198	1
Endothelial_cells__TTC13	Endothelial_cells	TTC13	1
Endothelial_cells__ARV1	Endothelial_cells	ARV1	1
Endothelial_cells__FAM89A	Endothelial_cells	FAM89A	1
Endothelial_cells__C1ORF131	Endothelial_cells	C1ORF131	1
Endothelial_cells__GNPAT	Endothelial_cells	GNPAT	1
Endothelial_cells__EXOC8	Endothelial_cells	EXOC8	1
Endothelial_cells__SPRTN	Endothelial_cells	SPRTN	1
Endothelial_cells__EGLN1	Endothelial_cells	EGLN1	1
Endothelial_cells__TSNAX	Endothelial_cells	TSNAX	1
Endothelial_cells__DISC1	Endothelial_cells	DISC1	1
Endothelial_cells__SIPA1L2	Endothelial_cells	SIPA1L2	1
Endothelial_cells__NTPCR	Endothelial_cells	NTPCR	1
Endothelial_cells__KCNK1	Endothelial_cells	KCNK1	1
Endothelial_cells__SLC35F3	Endothelial_cells	SLC35F3	1
Endothelial_cells__COA6	Endothelial_cells	COA6	1
Endothelial_cells__TARBP1	Endothelial_cells	TARBP1	1
Endothelial_cells__IRF2BP2	Endothelial_cells	IRF2BP2	1
Endothelial_cells__TOMM20	Endothelial_cells	TOMM20	1
Endothelial_cells__RBM34	Endothelial_cells	RBM34	1
Endothelial_cells__ARID4B	Endothelial_cells	ARID4B	1
Endothelial_cells__GGPS1	Endothelial_cells	GGPS1	1
Endothelial_cells__TBCE	Endothelial_cells	TBCE	1
Endothelial_cells__B3GALNT2	Endothelial_cells	B3GALNT2	1
Endothelial_cells__LYST	Endothelial_cells	LYST	1
Endothelial_cells__NID1	Endothelial_cells	NID1	1
Endothelial_cells__GPR137B	Endothelial_cells	GPR137B	1
Endothelial_cells__ERO1B	Endothelial_cells	ERO1B	1
Endothelial_cells__LGALS8	Endothelial_cells	LGALS8	1
Endothelial_cells__HEATR1	Endothelial_cells	HEATR1	1
Endothelial_cells__MTR	Endothelial_cells	MTR	1
Endothelial_cells__RYR2	Endothelial_cells	RYR2	1
Endothelial_cells__CHRM3	Endothelial_cells	CHRM3	1
Endothelial_cells__FH	Endothelial_cells	FH	1
Endothelial_cells__KMO	Endothelial_cells	KMO	1
Endothelial_cells__OPN3	Endothelial_cells	OPN3	1
Endothelial_cells__CHML	Endothelial_cells	CHML	1
Endothelial_cells__PLD5	Endothelial_cells	PLD5	1
Endothelial_cells__CEP170	Endothelial_cells	CEP170	1
Endothelial_cells__SDCCAG8	Endothelial_cells	SDCCAG8	1
Endothelial_cells__AKT3	Endothelial_cells	AKT3	1
Endothelial_cells__ZBTB18	Endothelial_cells	ZBTB18	1
Endothelial_cells__ADSS	Endothelial_cells	ADSS	1
Endothelial_cells__DESI2	Endothelial_cells	DESI2	1
Endothelial_cells__COX20	Endothelial_cells	COX20	1
Endothelial_cells__HNRNPU	Endothelial_cells	HNRNPU	1
Endothelial_cells__EFCAB2	Endothelial_cells	EFCAB2	1
Endothelial_cells__KIF26B	Endothelial_cells	KIF26B	1
Endothelial_cells__SMYD3	Endothelial_cells	SMYD3	1
Endothelial_cells__TFB2M	Endothelial_cells	TFB2M	1
Endothelial_cells__CNST	Endothelial_cells	CNST	1
Endothelial_cells__SCCPDH	Endothelial_cells	SCCPDH	1
Endothelial_cells__AHCTF1	Endothelial_cells	AHCTF1	1
Endothelial_cells__ZNF670	Endothelial_cells	ZNF670	1
Endothelial_cells__ZNF669	Endothelial_cells	ZNF669	1
Endothelial_cells__ZNF124	Endothelial_cells	ZNF124	1
Endothelial_cells__ZNF496	Endothelial_cells	ZNF496	1
Endothelial_cells__NLRP3	Endothelial_cells	NLRP3	1
Endothelial_cells__SH3BP5L	Endothelial_cells	SH3BP5L	1
Endothelial_cells__ZNF672	Endothelial_cells	ZNF672	1
Endothelial_cells__ZNF692	Endothelial_cells	ZNF692	1
Endothelial_cells__PGBD2	Endothelial_cells	PGBD2	1
Endothelial_cells__SH3YL1	Endothelial_cells	SH3YL1	1
Endothelial_cells__ACP1	Endothelial_cells	ACP1	1
Endothelial_cells__TMEM18	Endothelial_cells	TMEM18	1
Endothelial_cells__SNTG2	Endothelial_cells	SNTG2	1
Endothelial_cells__PXDN	Endothelial_cells	PXDN	1
Endothelial_cells__TRAPPC12	Endothelial_cells	TRAPPC12	1
Endothelial_cells__ADI1	Endothelial_cells	ADI1	1
Endothelial_cells__RNASEH1	Endothelial_cells	RNASEH1	1
Endothelial_cells__CMPK2	Endothelial_cells	CMPK2	1
Endothelial_cells__RSAD2	Endothelial_cells	RSAD2	1
Endothelial_cells__RNF144A	Endothelial_cells	RNF144A	1
Endothelial_cells__ID2	Endothelial_cells	ID2	1
Endothelial_cells__KIDINS220	Endothelial_cells	KIDINS220	1
Endothelial_cells__MBOAT2	Endothelial_cells	MBOAT2	1
Endothelial_cells__ASAP2	Endothelial_cells	ASAP2	1
Endothelial_cells__ITGB1BP1	Endothelial_cells	ITGB1BP1	1
Endothelial_cells__CPSF3	Endothelial_cells	CPSF3	1
Endothelial_cells__IAH1	Endothelial_cells	IAH1	1
Endothelial_cells__ADAM17	Endothelial_cells	ADAM17	1
Endothelial_cells__YWHAQ	Endothelial_cells	YWHAQ	1
Endothelial_cells__TAF1B	Endothelial_cells	TAF1B	1
Endothelial_cells__GRHL1	Endothelial_cells	GRHL1	1
Endothelial_cells__KLF11	Endothelial_cells	KLF11	1
Endothelial_cells__RRM2	Endothelial_cells	RRM2	1
Endothelial_cells__HPCAL1	Endothelial_cells	HPCAL1	1
Endothelial_cells__ODC1	Endothelial_cells	ODC1	1
Endothelial_cells__NOL10	Endothelial_cells	NOL10	1
Endothelial_cells__PDIA6	Endothelial_cells	PDIA6	1
Endothelial_cells__ROCK2	Endothelial_cells	ROCK2	1
Endothelial_cells__E2F6	Endothelial_cells	E2F6	1
Endothelial_cells__LPIN1	Endothelial_cells	LPIN1	1
Endothelial_cells__TRIB2	Endothelial_cells	TRIB2	1
Endothelial_cells__NBAS	Endothelial_cells	NBAS	1
Endothelial_cells__DDX1	Endothelial_cells	DDX1	1
Endothelial_cells__FAM49A	Endothelial_cells	FAM49A	1
Endothelial_cells__SMC6	Endothelial_cells	SMC6	1
Endothelial_cells__GEN1	Endothelial_cells	GEN1	1
Endothelial_cells__KCNS3	Endothelial_cells	KCNS3	1
Endothelial_cells__RDH14	Endothelial_cells	RDH14	1
Endothelial_cells__TTC32	Endothelial_cells	TTC32	1
Endothelial_cells__WDR35	Endothelial_cells	WDR35	1
Endothelial_cells__LAPTM4A	Endothelial_cells	LAPTM4A	1
Endothelial_cells__SDC1	Endothelial_cells	SDC1	1
Endothelial_cells__PUM2	Endothelial_cells	PUM2	1
Endothelial_cells__RHOB	Endothelial_cells	RHOB	1
Endothelial_cells__HS1BP3	Endothelial_cells	HS1BP3	1
Endothelial_cells__LDAH	Endothelial_cells	LDAH	1
Endothelial_cells__KLHL29	Endothelial_cells	KLHL29	1
Endothelial_cells__ATAD2B	Endothelial_cells	ATAD2B	1
Endothelial_cells__UBXN2A	Endothelial_cells	UBXN2A	1
Endothelial_cells__FKBP1B	Endothelial_cells	FKBP1B	1
Endothelial_cells__SF3B6	Endothelial_cells	SF3B6	1
Endothelial_cells__FAM228B	Endothelial_cells	FAM228B	1
Endothelial_cells__TP53I3	Endothelial_cells	TP53I3	1
Endothelial_cells__ITSN2	Endothelial_cells	ITSN2	1
Endothelial_cells__NCOA1	Endothelial_cells	NCOA1	1
Endothelial_cells__PTRHD1	Endothelial_cells	PTRHD1	1
Endothelial_cells__CENPO	Endothelial_cells	CENPO	1
Endothelial_cells__ADCY3	Endothelial_cells	ADCY3	1
Endothelial_cells__DNAJC27	Endothelial_cells	DNAJC27	1
Endothelial_cells__EFR3B	Endothelial_cells	EFR3B	1
Endothelial_cells__DNMT3A	Endothelial_cells	DNMT3A	1
Endothelial_cells__DTNB	Endothelial_cells	DTNB	1
Endothelial_cells__ASXL2	Endothelial_cells	ASXL2	1
Endothelial_cells__KIF3C	Endothelial_cells	KIF3C	1
Endothelial_cells__RAB10	Endothelial_cells	RAB10	1
Endothelial_cells__HADHA	Endothelial_cells	HADHA	1
Endothelial_cells__HADHB	Endothelial_cells	HADHB	1
Endothelial_cells__SLC35F6	Endothelial_cells	SLC35F6	1
Endothelial_cells__MAPRE3	Endothelial_cells	MAPRE3	1
Endothelial_cells__TMEM214	Endothelial_cells	TMEM214	1
Endothelial_cells__AGBL5	Endothelial_cells	AGBL5	1
Endothelial_cells__OST4	Endothelial_cells	OST4	1
Endothelial_cells__EMILIN1	Endothelial_cells	EMILIN1	1
Endothelial_cells__KHK	Endothelial_cells	KHK	1
Endothelial_cells__PREB	Endothelial_cells	PREB	1
Endothelial_cells__SLC5A6	Endothelial_cells	SLC5A6	1
Endothelial_cells__ATRAID	Endothelial_cells	ATRAID	1
Endothelial_cells__CAD	Endothelial_cells	CAD	1
Endothelial_cells__MPV17	Endothelial_cells	MPV17	1
Endothelial_cells__GTF3C2	Endothelial_cells	GTF3C2	1
Endothelial_cells__EIF2B4	Endothelial_cells	EIF2B4	1
Endothelial_cells__SNX17	Endothelial_cells	SNX17	1
Endothelial_cells__ZNF513	Endothelial_cells	ZNF513	1
Endothelial_cells__PPM1G	Endothelial_cells	PPM1G	1
Endothelial_cells__NRBP1	Endothelial_cells	NRBP1	1
Endothelial_cells__KRTCAP3	Endothelial_cells	KRTCAP3	1
Endothelial_cells__IFT172	Endothelial_cells	IFT172	1
Endothelial_cells__ZNF512	Endothelial_cells	ZNF512	1
Endothelial_cells__GPN1	Endothelial_cells	GPN1	1
Endothelial_cells__SUPT7L	Endothelial_cells	SUPT7L	1
Endothelial_cells__SLC4A1AP	Endothelial_cells	SLC4A1AP	1
Endothelial_cells__RBKS	Endothelial_cells	RBKS	1
Endothelial_cells__FOSL2	Endothelial_cells	FOSL2	1
Endothelial_cells__PPP1CB	Endothelial_cells	PPP1CB	1
Endothelial_cells__TRMT61B	Endothelial_cells	TRMT61B	1
Endothelial_cells__WDR43	Endothelial_cells	WDR43	1
Endothelial_cells__CLIP4	Endothelial_cells	CLIP4	1
Endothelial_cells__YPEL5	Endothelial_cells	YPEL5	1
Endothelial_cells__LBH	Endothelial_cells	LBH	1
Endothelial_cells__LCLAT1	Endothelial_cells	LCLAT1	1
Endothelial_cells__CAPN13	Endothelial_cells	CAPN13	1
Endothelial_cells__GALNT14	Endothelial_cells	GALNT14	1
Endothelial_cells__EHD3	Endothelial_cells	EHD3	1
Endothelial_cells__MEMO1	Endothelial_cells	MEMO1	1
Endothelial_cells__DPY30	Endothelial_cells	DPY30	1
Endothelial_cells__SPAST	Endothelial_cells	SPAST	1
Endothelial_cells__SLC30A6	Endothelial_cells	SLC30A6	1
Endothelial_cells__NLRC4	Endothelial_cells	NLRC4	1
Endothelial_cells__YIPF4	Endothelial_cells	YIPF4	1
Endothelial_cells__BIRC6	Endothelial_cells	BIRC6	1
Endothelial_cells__TTC27	Endothelial_cells	TTC27	1
Endothelial_cells__LTBP1	Endothelial_cells	LTBP1	1
Endothelial_cells__RASGRP3	Endothelial_cells	RASGRP3	1
Endothelial_cells__FAM98A	Endothelial_cells	FAM98A	1
Endothelial_cells__CRIM1	Endothelial_cells	CRIM1	1
Endothelial_cells__FEZ2	Endothelial_cells	FEZ2	1
Endothelial_cells__STRN	Endothelial_cells	STRN	1
Endothelial_cells__HEATR5B	Endothelial_cells	HEATR5B	1
Endothelial_cells__GPATCH11	Endothelial_cells	GPATCH11	1
Endothelial_cells__EIF2AK2	Endothelial_cells	EIF2AK2	1
Endothelial_cells__CEBPZOS	Endothelial_cells	CEBPZOS	1
Endothelial_cells__CEBPZ	Endothelial_cells	CEBPZ	1
Endothelial_cells__NDUFAF7	Endothelial_cells	NDUFAF7	1
Endothelial_cells__PRKD3	Endothelial_cells	PRKD3	1
Endothelial_cells__QPCT	Endothelial_cells	QPCT	1
Endothelial_cells__CDC42EP3	Endothelial_cells	CDC42EP3	1
Endothelial_cells__RMDN2	Endothelial_cells	RMDN2	1
Endothelial_cells__CYP1B1	Endothelial_cells	CYP1B1	1
Endothelial_cells__ATL2	Endothelial_cells	ATL2	1
Endothelial_cells__HNRNPLL	Endothelial_cells	HNRNPLL	1
Endothelial_cells__GALM	Endothelial_cells	GALM	1
Endothelial_cells__SRSF7	Endothelial_cells	SRSF7	1
Endothelial_cells__GEMIN6	Endothelial_cells	GEMIN6	1
Endothelial_cells__DHX57	Endothelial_cells	DHX57	1
Endothelial_cells__MORN2	Endothelial_cells	MORN2	1
Endothelial_cells__SOS1	Endothelial_cells	SOS1	1
Endothelial_cells__MAP4K3	Endothelial_cells	MAP4K3	1
Endothelial_cells__THUMPD2	Endothelial_cells	THUMPD2	1
Endothelial_cells__SLC8A1	Endothelial_cells	SLC8A1	1
Endothelial_cells__PKDCC	Endothelial_cells	PKDCC	1
Endothelial_cells__EML4	Endothelial_cells	EML4	1
Endothelial_cells__COX7A2L	Endothelial_cells	COX7A2L	1
Endothelial_cells__MTA3	Endothelial_cells	MTA3	1
Endothelial_cells__ZFP36L2	Endothelial_cells	ZFP36L2	1
Endothelial_cells__THADA	Endothelial_cells	THADA	1
Endothelial_cells__PLEKHH2	Endothelial_cells	PLEKHH2	1
Endothelial_cells__DYNC2LI1	Endothelial_cells	DYNC2LI1	1
Endothelial_cells__LRPPRC	Endothelial_cells	LRPPRC	1
Endothelial_cells__PPM1B	Endothelial_cells	PPM1B	1
Endothelial_cells__PREPL	Endothelial_cells	PREPL	1
Endothelial_cells__CAMKMT	Endothelial_cells	CAMKMT	1
Endothelial_cells__SRBD1	Endothelial_cells	SRBD1	1
Endothelial_cells__PRKCE	Endothelial_cells	PRKCE	1
Endothelial_cells__EPAS1	Endothelial_cells	EPAS1	1
Endothelial_cells__RHOQ	Endothelial_cells	RHOQ	1
Endothelial_cells__PIGF	Endothelial_cells	PIGF	1
Endothelial_cells__CRIPT	Endothelial_cells	CRIPT	1
Endothelial_cells__SOCS5	Endothelial_cells	SOCS5	1
Endothelial_cells__MCFD2	Endothelial_cells	MCFD2	1
Endothelial_cells__TTC7A	Endothelial_cells	TTC7A	1
Endothelial_cells__CALM2	Endothelial_cells	CALM2	1
Endothelial_cells__EPCAM	Endothelial_cells	EPCAM	1
Endothelial_cells__MSH2	Endothelial_cells	MSH2	1
Endothelial_cells__MSH6	Endothelial_cells	MSH6	1
Endothelial_cells__FBXO11	Endothelial_cells	FBXO11	1
Endothelial_cells__FOXN2	Endothelial_cells	FOXN2	1
Endothelial_cells__PPP1R21	Endothelial_cells	PPP1R21	1
Endothelial_cells__STON1	Endothelial_cells	STON1	1
Endothelial_cells__ASB3	Endothelial_cells	ASB3	1
Endothelial_cells__ERLEC1	Endothelial_cells	ERLEC1	1
Endothelial_cells__PSME4	Endothelial_cells	PSME4	1
Endothelial_cells__ACYP2	Endothelial_cells	ACYP2	1
Endothelial_cells__SPTBN1	Endothelial_cells	SPTBN1	1
Endothelial_cells__EML6	Endothelial_cells	EML6	1
Endothelial_cells__RTN4	Endothelial_cells	RTN4	1
Endothelial_cells__CLHC1	Endothelial_cells	CLHC1	1
Endothelial_cells__MTIF2	Endothelial_cells	MTIF2	1
Endothelial_cells__CCDC88A	Endothelial_cells	CCDC88A	1
Endothelial_cells__CFAP36	Endothelial_cells	CFAP36	1
Endothelial_cells__PPP4R3B	Endothelial_cells	PPP4R3B	1
Endothelial_cells__PNPT1	Endothelial_cells	PNPT1	1
Endothelial_cells__EFEMP1	Endothelial_cells	EFEMP1	1
Endothelial_cells__CCDC85A	Endothelial_cells	CCDC85A	1
Endothelial_cells__VRK2	Endothelial_cells	VRK2	1
Endothelial_cells__FANCL	Endothelial_cells	FANCL	1
Endothelial_cells__BCL11A	Endothelial_cells	BCL11A	1
Endothelial_cells__PAPOLG	Endothelial_cells	PAPOLG	1
Endothelial_cells__REL	Endothelial_cells	REL	1
Endothelial_cells__PUS10	Endothelial_cells	PUS10	1
Endothelial_cells__PEX13	Endothelial_cells	PEX13	1
Endothelial_cells__KIAA1841	Endothelial_cells	KIAA1841	1
Endothelial_cells__C2ORF74	Endothelial_cells	C2ORF74	1
Endothelial_cells__USP34	Endothelial_cells	USP34	1
Endothelial_cells__XPO1	Endothelial_cells	XPO1	1
Endothelial_cells__FAM161A	Endothelial_cells	FAM161A	1
Endothelial_cells__CCT4	Endothelial_cells	CCT4	1
Endothelial_cells__COMMD1	Endothelial_cells	COMMD1	1
Endothelial_cells__B3GNT2	Endothelial_cells	B3GNT2	1
Endothelial_cells__EHBP1	Endothelial_cells	EHBP1	1
Endothelial_cells__WDPCP	Endothelial_cells	WDPCP	1
Endothelial_cells__MDH1	Endothelial_cells	MDH1	1
Endothelial_cells__UGP2	Endothelial_cells	UGP2	1
Endothelial_cells__VPS54	Endothelial_cells	VPS54	1
Endothelial_cells__PELI1	Endothelial_cells	PELI1	1
Endothelial_cells__LGALSL	Endothelial_cells	LGALSL	1
Endothelial_cells__AFTPH	Endothelial_cells	AFTPH	1
Endothelial_cells__SERTAD2	Endothelial_cells	SERTAD2	1
Endothelial_cells__SLC1A4	Endothelial_cells	SLC1A4	1
Endothelial_cells__CEP68	Endothelial_cells	CEP68	1
Endothelial_cells__RAB1A	Endothelial_cells	RAB1A	1
Endothelial_cells__ACTR2	Endothelial_cells	ACTR2	1
Endothelial_cells__SPRED2	Endothelial_cells	SPRED2	1
Endothelial_cells__MEIS1	Endothelial_cells	MEIS1	1
Endothelial_cells__ETAA1	Endothelial_cells	ETAA1	1
Endothelial_cells__C1D	Endothelial_cells	C1D	1
Endothelial_cells__WDR92	Endothelial_cells	WDR92	1
Endothelial_cells__PNO1	Endothelial_cells	PNO1	1
Endothelial_cells__PPP3R1	Endothelial_cells	PPP3R1	1
Endothelial_cells__CNRIP1	Endothelial_cells	CNRIP1	1
Endothelial_cells__PLEK	Endothelial_cells	PLEK	1
Endothelial_cells__APLF	Endothelial_cells	APLF	1
Endothelial_cells__ARHGAP25	Endothelial_cells	ARHGAP25	1
Endothelial_cells__GKN2	Endothelial_cells	GKN2	1
Endothelial_cells__ANTXR1	Endothelial_cells	ANTXR1	1
Endothelial_cells__GFPT1	Endothelial_cells	GFPT1	1
Endothelial_cells__NFU1	Endothelial_cells	NFU1	1
Endothelial_cells__AAK1	Endothelial_cells	AAK1	1
Endothelial_cells__ANXA4	Endothelial_cells	ANXA4	1
Endothelial_cells__GMCL1	Endothelial_cells	GMCL1	1
Endothelial_cells__SNRNP27	Endothelial_cells	SNRNP27	1
Endothelial_cells__MXD1	Endothelial_cells	MXD1	1
Endothelial_cells__PCBP1	Endothelial_cells	PCBP1	1
Endothelial_cells__C2ORF42	Endothelial_cells	C2ORF42	1
Endothelial_cells__TIA1	Endothelial_cells	TIA1	1
Endothelial_cells__PCYOX1	Endothelial_cells	PCYOX1	1
Endothelial_cells__SNRPG	Endothelial_cells	SNRPG	1
Endothelial_cells__FAM136A	Endothelial_cells	FAM136A	1
Endothelial_cells__TGFA	Endothelial_cells	TGFA	1
Endothelial_cells__TEX261	Endothelial_cells	TEX261	1
Endothelial_cells__NAGK	Endothelial_cells	NAGK	1
Endothelial_cells__MCEE	Endothelial_cells	MCEE	1
Endothelial_cells__MPHOSPH10	Endothelial_cells	MPHOSPH10	1
Endothelial_cells__ZNF638	Endothelial_cells	ZNF638	1
Endothelial_cells__DYSF	Endothelial_cells	DYSF	1
Endothelial_cells__EXOC6B	Endothelial_cells	EXOC6B	1
Endothelial_cells__SPR	Endothelial_cells	SPR	1
Endothelial_cells__SFXN5	Endothelial_cells	SFXN5	1
Endothelial_cells__RAB11FIP5	Endothelial_cells	RAB11FIP5	1
Endothelial_cells__SMYD5	Endothelial_cells	SMYD5	1
Endothelial_cells__PRADC1	Endothelial_cells	PRADC1	1
Endothelial_cells__ALMS1	Endothelial_cells	ALMS1	1
Endothelial_cells__TPRKB	Endothelial_cells	TPRKB	1
Endothelial_cells__DUSP11	Endothelial_cells	DUSP11	1
Endothelial_cells__STAMBP	Endothelial_cells	STAMBP	1
Endothelial_cells__ACTG2	Endothelial_cells	ACTG2	1
Endothelial_cells__DGUOK	Endothelial_cells	DGUOK	1
Endothelial_cells__TET3	Endothelial_cells	TET3	1
Endothelial_cells__BOLA3	Endothelial_cells	BOLA3	1
Endothelial_cells__MOB1A	Endothelial_cells	MOB1A	1
Endothelial_cells__MTHFD2	Endothelial_cells	MTHFD2	1
Endothelial_cells__SLC4A5	Endothelial_cells	SLC4A5	1
Endothelial_cells__DCTN1	Endothelial_cells	DCTN1	1
Endothelial_cells__WDR54	Endothelial_cells	WDR54	1
Endothelial_cells__RTKN	Endothelial_cells	RTKN	1
Endothelial_cells__INO80B	Endothelial_cells	INO80B	1
Endothelial_cells__WBP1	Endothelial_cells	WBP1	1
Endothelial_cells__MOGS	Endothelial_cells	MOGS	1
Endothelial_cells__CCDC142	Endothelial_cells	CCDC142	1
Endothelial_cells__TTC31	Endothelial_cells	TTC31	1
Endothelial_cells__PCGF1	Endothelial_cells	PCGF1	1
Endothelial_cells__AUP1	Endothelial_cells	AUP1	1
Endothelial_cells__HTRA2	Endothelial_cells	HTRA2	1
Endothelial_cells__DOK1	Endothelial_cells	DOK1	1
Endothelial_cells__HK2	Endothelial_cells	HK2	1
Endothelial_cells__POLE4	Endothelial_cells	POLE4	1
Endothelial_cells__TACR1	Endothelial_cells	TACR1	1
Endothelial_cells__EVA1A	Endothelial_cells	EVA1A	1
Endothelial_cells__GCFC2	Endothelial_cells	GCFC2	1
Endothelial_cells__SUCLG1	Endothelial_cells	SUCLG1	1
Endothelial_cells__DNAH6	Endothelial_cells	DNAH6	1
Endothelial_cells__TRABD2A	Endothelial_cells	TRABD2A	1
Endothelial_cells__TMSB10	Endothelial_cells	TMSB10	1
Endothelial_cells__KCMF1	Endothelial_cells	KCMF1	1
Endothelial_cells__TCF7L1	Endothelial_cells	TCF7L1	1
Endothelial_cells__TGOLN2	Endothelial_cells	TGOLN2	1
Endothelial_cells__RETSAT	Endothelial_cells	RETSAT	1
Endothelial_cells__ELMOD3	Endothelial_cells	ELMOD3	1
Endothelial_cells__CAPG	Endothelial_cells	CAPG	1
Endothelial_cells__MAT2A	Endothelial_cells	MAT2A	1
Endothelial_cells__GGCX	Endothelial_cells	GGCX	1
Endothelial_cells__VAMP8	Endothelial_cells	VAMP8	1
Endothelial_cells__VAMP5	Endothelial_cells	VAMP5	1
Endothelial_cells__RNF181	Endothelial_cells	RNF181	1
Endothelial_cells__TMEM150A	Endothelial_cells	TMEM150A	1
Endothelial_cells__USP39	Endothelial_cells	USP39	1
Endothelial_cells__C2ORF68	Endothelial_cells	C2ORF68	1
Endothelial_cells__SFTPB	Endothelial_cells	SFTPB	1
Endothelial_cells__GNLY	Endothelial_cells	GNLY	1
Endothelial_cells__ATOH8	Endothelial_cells	ATOH8	1
Endothelial_cells__ST3GAL5	Endothelial_cells	ST3GAL5	1
Endothelial_cells__POLR1A	Endothelial_cells	POLR1A	1
Endothelial_cells__PTCD3	Endothelial_cells	PTCD3	1
Endothelial_cells__IMMT	Endothelial_cells	IMMT	1
Endothelial_cells__REEP1	Endothelial_cells	REEP1	1
Endothelial_cells__KDM3A	Endothelial_cells	KDM3A	1
Endothelial_cells__CHMP3	Endothelial_cells	CHMP3	1
Endothelial_cells__RNF103	Endothelial_cells	RNF103	1
Endothelial_cells__RMND5A	Endothelial_cells	RMND5A	1
Endothelial_cells__KRCC1	Endothelial_cells	KRCC1	1
Endothelial_cells__THNSL2	Endothelial_cells	THNSL2	1
Endothelial_cells__EIF2AK3	Endothelial_cells	EIF2AK3	1
Endothelial_cells__RPIA	Endothelial_cells	RPIA	1
Endothelial_cells__IGKC	Endothelial_cells	IGKC	1
Endothelial_cells__ZNF514	Endothelial_cells	ZNF514	1
Endothelial_cells__PROM2	Endothelial_cells	PROM2	1
Endothelial_cells__FAHD2A	Endothelial_cells	FAHD2A	1
Endothelial_cells__ANKRD36C	Endothelial_cells	ANKRD36C	1
Endothelial_cells__STARD7	Endothelial_cells	STARD7	1
Endothelial_cells__TMEM127	Endothelial_cells	TMEM127	1
Endothelial_cells__CIAO1	Endothelial_cells	CIAO1	1
Endothelial_cells__SNRNP200	Endothelial_cells	SNRNP200	1
Endothelial_cells__ARID5A	Endothelial_cells	ARID5A	1
Endothelial_cells__KANSL3	Endothelial_cells	KANSL3	1
Endothelial_cells__LMAN2L	Endothelial_cells	LMAN2L	1
Endothelial_cells__CNNM4	Endothelial_cells	CNNM4	1
Endothelial_cells__CNNM3	Endothelial_cells	CNNM3	1
Endothelial_cells__ANKRD23	Endothelial_cells	ANKRD23	1
Endothelial_cells__ANKRD39	Endothelial_cells	ANKRD39	1
Endothelial_cells__SEMA4C	Endothelial_cells	SEMA4C	1
Endothelial_cells__FAHD2B	Endothelial_cells	FAHD2B	1
Endothelial_cells__ANKRD36	Endothelial_cells	ANKRD36	1
Endothelial_cells__ANKRD36B	Endothelial_cells	ANKRD36B	1
Endothelial_cells__COX5B	Endothelial_cells	COX5B	1
Endothelial_cells__ACTR1B	Endothelial_cells	ACTR1B	1
Endothelial_cells__ZAP70	Endothelial_cells	ZAP70	1
Endothelial_cells__TMEM131	Endothelial_cells	TMEM131	1
Endothelial_cells__INPP4A	Endothelial_cells	INPP4A	1
Endothelial_cells__COA5	Endothelial_cells	COA5	1
Endothelial_cells__UNC50	Endothelial_cells	UNC50	1
Endothelial_cells__MGAT4A	Endothelial_cells	MGAT4A	1
Endothelial_cells__KIAA1211L	Endothelial_cells	KIAA1211L	1
Endothelial_cells__TSGA10	Endothelial_cells	TSGA10	1
Endothelial_cells__LIPT1	Endothelial_cells	LIPT1	1
Endothelial_cells__MITD1	Endothelial_cells	MITD1	1
Endothelial_cells__TXNDC9	Endothelial_cells	TXNDC9	1
Endothelial_cells__EIF5B	Endothelial_cells	EIF5B	1
Endothelial_cells__REV1	Endothelial_cells	REV1	1
Endothelial_cells__AFF3	Endothelial_cells	AFF3	1
Endothelial_cells__LONRF2	Endothelial_cells	LONRF2	1
Endothelial_cells__CHST10	Endothelial_cells	CHST10	1
Endothelial_cells__PDCL3	Endothelial_cells	PDCL3	1
Endothelial_cells__NPAS2	Endothelial_cells	NPAS2	1
Endothelial_cells__TBC1D8	Endothelial_cells	TBC1D8	1
Endothelial_cells__CNOT11	Endothelial_cells	CNOT11	1
Endothelial_cells__RNF149	Endothelial_cells	RNF149	1
Endothelial_cells__MAP4K4	Endothelial_cells	MAP4K4	1
Endothelial_cells__IL1R2	Endothelial_cells	IL1R2	1
Endothelial_cells__IL1R1	Endothelial_cells	IL1R1	1
Endothelial_cells__IL1RL1	Endothelial_cells	IL1RL1	1
Endothelial_cells__IL18R1	Endothelial_cells	IL18R1	1
Endothelial_cells__IL18RAP	Endothelial_cells	IL18RAP	1
Endothelial_cells__MFSD9	Endothelial_cells	MFSD9	1
Endothelial_cells__TMEM182	Endothelial_cells	TMEM182	1
Endothelial_cells__TGFBRAP1	Endothelial_cells	TGFBRAP1	1
Endothelial_cells__C2ORF49	Endothelial_cells	C2ORF49	1
Endothelial_cells__FHL2	Endothelial_cells	FHL2	1
Endothelial_cells__NCK2	Endothelial_cells	NCK2	1
Endothelial_cells__UXS1	Endothelial_cells	UXS1	1
Endothelial_cells__SULT1C2	Endothelial_cells	SULT1C2	1
Endothelial_cells__SULT1C4	Endothelial_cells	SULT1C4	1
Endothelial_cells__GCC2	Endothelial_cells	GCC2	1
Endothelial_cells__LIMS1	Endothelial_cells	LIMS1	1
Endothelial_cells__CCDC138	Endothelial_cells	CCDC138	1
Endothelial_cells__SH3RF3	Endothelial_cells	SH3RF3	1
Endothelial_cells__SOWAHC	Endothelial_cells	SOWAHC	1
Endothelial_cells__MALL	Endothelial_cells	MALL	1
Endothelial_cells__NPHP1	Endothelial_cells	NPHP1	1
Endothelial_cells__ACOXL	Endothelial_cells	ACOXL	1
Endothelial_cells__BCL2L11	Endothelial_cells	BCL2L11	1
Endothelial_cells__ANAPC1	Endothelial_cells	ANAPC1	1
Endothelial_cells__MERTK	Endothelial_cells	MERTK	1
Endothelial_cells__TMEM87B	Endothelial_cells	TMEM87B	1
Endothelial_cells__FBLN7	Endothelial_cells	FBLN7	1
Endothelial_cells__ZC3H8	Endothelial_cells	ZC3H8	1
Endothelial_cells__ZC3H6	Endothelial_cells	ZC3H6	1
Endothelial_cells__TTL	Endothelial_cells	TTL	1
Endothelial_cells__POLR1B	Endothelial_cells	POLR1B	1
Endothelial_cells__CHCHD5	Endothelial_cells	CHCHD5	1
Endothelial_cells__SLC20A1	Endothelial_cells	SLC20A1	1
Endothelial_cells__PSD4	Endothelial_cells	PSD4	1
Endothelial_cells__CBWD2	Endothelial_cells	CBWD2	1
Endothelial_cells__RABL2A	Endothelial_cells	RABL2A	1
Endothelial_cells__SLC35F5	Endothelial_cells	SLC35F5	1
Endothelial_cells__ACTR3	Endothelial_cells	ACTR3	1
Endothelial_cells__DPP10	Endothelial_cells	DPP10	1
Endothelial_cells__DDX18	Endothelial_cells	DDX18	1
Endothelial_cells__CCDC93	Endothelial_cells	CCDC93	1
Endothelial_cells__INSIG2	Endothelial_cells	INSIG2	1
Endothelial_cells__MARCO	Endothelial_cells	MARCO	1
Endothelial_cells__STEAP3	Endothelial_cells	STEAP3	1
Endothelial_cells__C2ORF76	Endothelial_cells	C2ORF76	1
Endothelial_cells__DBI	Endothelial_cells	DBI	1
Endothelial_cells__TMEM37	Endothelial_cells	TMEM37	1
Endothelial_cells__SCTR	Endothelial_cells	SCTR	1
Endothelial_cells__CFAP221	Endothelial_cells	CFAP221	1
Endothelial_cells__PTPN4	Endothelial_cells	PTPN4	1
Endothelial_cells__EPB41L5	Endothelial_cells	EPB41L5	1
Endothelial_cells__TMEM185B	Endothelial_cells	TMEM185B	1
Endothelial_cells__RALB	Endothelial_cells	RALB	1
Endothelial_cells__INHBB	Endothelial_cells	INHBB	1
Endothelial_cells__GLI2	Endothelial_cells	GLI2	1
Endothelial_cells__TFCP2L1	Endothelial_cells	TFCP2L1	1
Endothelial_cells__CLASP1	Endothelial_cells	CLASP1	1
Endothelial_cells__NIFK	Endothelial_cells	NIFK	1
Endothelial_cells__TSN	Endothelial_cells	TSN	1
Endothelial_cells__GYPC	Endothelial_cells	GYPC	1
Endothelial_cells__BIN1	Endothelial_cells	BIN1	1
Endothelial_cells__ERCC3	Endothelial_cells	ERCC3	1
Endothelial_cells__MAP3K2	Endothelial_cells	MAP3K2	1
Endothelial_cells__IWS1	Endothelial_cells	IWS1	1
Endothelial_cells__MYO7B	Endothelial_cells	MYO7B	1
Endothelial_cells__LIMS2	Endothelial_cells	LIMS2	1
Endothelial_cells__WDR33	Endothelial_cells	WDR33	1
Endothelial_cells__SFT2D3	Endothelial_cells	SFT2D3	1
Endothelial_cells__POLR2D	Endothelial_cells	POLR2D	1
Endothelial_cells__AMMECR1L	Endothelial_cells	AMMECR1L	1
Endothelial_cells__SAP130	Endothelial_cells	SAP130	1
Endothelial_cells__UGGT1	Endothelial_cells	UGGT1	1
Endothelial_cells__HS6ST1	Endothelial_cells	HS6ST1	1
Endothelial_cells__SMPD4	Endothelial_cells	SMPD4	1
Endothelial_cells__MZT2B	Endothelial_cells	MZT2B	1
Endothelial_cells__CCDC115	Endothelial_cells	CCDC115	1
Endothelial_cells__IMP4	Endothelial_cells	IMP4	1
Endothelial_cells__PTPN18	Endothelial_cells	PTPN18	1
Endothelial_cells__FAM168B	Endothelial_cells	FAM168B	1
Endothelial_cells__PLEKHB2	Endothelial_cells	PLEKHB2	1
Endothelial_cells__MZT2A	Endothelial_cells	MZT2A	1
Endothelial_cells__GPR39	Endothelial_cells	GPR39	1
Endothelial_cells__NCKAP5	Endothelial_cells	NCKAP5	1
Endothelial_cells__MGAT5	Endothelial_cells	MGAT5	1
Endothelial_cells__TMEM163	Endothelial_cells	TMEM163	1
Endothelial_cells__CCNT2	Endothelial_cells	CCNT2	1
Endothelial_cells__RAB3GAP1	Endothelial_cells	RAB3GAP1	1
Endothelial_cells__ZRANB3	Endothelial_cells	ZRANB3	1
Endothelial_cells__R3HDM1	Endothelial_cells	R3HDM1	1
Endothelial_cells__UBXN4	Endothelial_cells	UBXN4	1
Endothelial_cells__MCM6	Endothelial_cells	MCM6	1
Endothelial_cells__DARS	Endothelial_cells	DARS	1
Endothelial_cells__CXCR4	Endothelial_cells	CXCR4	1
Endothelial_cells__HNMT	Endothelial_cells	HNMT	1
Endothelial_cells__SPOPL	Endothelial_cells	SPOPL	1
Endothelial_cells__LRP1B	Endothelial_cells	LRP1B	1
Endothelial_cells__KYNU	Endothelial_cells	KYNU	1
Endothelial_cells__ARHGAP15	Endothelial_cells	ARHGAP15	1
Endothelial_cells__GTDC1	Endothelial_cells	GTDC1	1
Endothelial_cells__ZEB2	Endothelial_cells	ZEB2	1
Endothelial_cells__ACVR2A	Endothelial_cells	ACVR2A	1
Endothelial_cells__ORC4	Endothelial_cells	ORC4	1
Endothelial_cells__MBD5	Endothelial_cells	MBD5	1
Endothelial_cells__EPC2	Endothelial_cells	EPC2	1
Endothelial_cells__LYPD6B	Endothelial_cells	LYPD6B	1
Endothelial_cells__MMADHC	Endothelial_cells	MMADHC	1
Endothelial_cells__RND3	Endothelial_cells	RND3	1
Endothelial_cells__RBM43	Endothelial_cells	RBM43	1
Endothelial_cells__NMI	Endothelial_cells	NMI	1
Endothelial_cells__RIF1	Endothelial_cells	RIF1	1
Endothelial_cells__NEB	Endothelial_cells	NEB	1
Endothelial_cells__ARL5A	Endothelial_cells	ARL5A	1
Endothelial_cells__CACNB4	Endothelial_cells	CACNB4	1
Endothelial_cells__STAM2	Endothelial_cells	STAM2	1
Endothelial_cells__FMNL2	Endothelial_cells	FMNL2	1
Endothelial_cells__PRPF40A	Endothelial_cells	PRPF40A	1
Endothelial_cells__ARL6IP6	Endothelial_cells	ARL6IP6	1
Endothelial_cells__NR4A2	Endothelial_cells	NR4A2	1
Endothelial_cells__GPD2	Endothelial_cells	GPD2	1
Endothelial_cells__GALNT5	Endothelial_cells	GALNT5	1
Endothelial_cells__CYTIP	Endothelial_cells	CYTIP	1
Endothelial_cells__ACVR1	Endothelial_cells	ACVR1	1
Endothelial_cells__CCDC148	Endothelial_cells	CCDC148	1
Endothelial_cells__PKP4	Endothelial_cells	PKP4	1
Endothelial_cells__TANC1	Endothelial_cells	TANC1	1
Endothelial_cells__WDSUB1	Endothelial_cells	WDSUB1	1
Endothelial_cells__BAZ2B	Endothelial_cells	BAZ2B	1
Endothelial_cells__MARCH7	Endothelial_cells	2025-03-07	1
Endothelial_cells__CD302	Endothelial_cells	CD302	1
Endothelial_cells__LY75	Endothelial_cells	LY75	1
Endothelial_cells__PLA2R1	Endothelial_cells	PLA2R1	1
Endothelial_cells__ITGB6	Endothelial_cells	ITGB6	1
Endothelial_cells__RBMS1	Endothelial_cells	RBMS1	1
Endothelial_cells__TANK	Endothelial_cells	TANK	1
Endothelial_cells__PSMD14	Endothelial_cells	PSMD14	1
Endothelial_cells__DPP4	Endothelial_cells	DPP4	1
Endothelial_cells__FAP	Endothelial_cells	FAP	1
Endothelial_cells__IFIH1	Endothelial_cells	IFIH1	1
Endothelial_cells__GCA	Endothelial_cells	GCA	1
Endothelial_cells__FIGN	Endothelial_cells	FIGN	1
Endothelial_cells__GRB14	Endothelial_cells	GRB14	1
Endothelial_cells__COBLL1	Endothelial_cells	COBLL1	1
Endothelial_cells__CSRNP3	Endothelial_cells	CSRNP3	1
Endothelial_cells__GALNT3	Endothelial_cells	GALNT3	1
Endothelial_cells__TTC21B	Endothelial_cells	TTC21B	1
Endothelial_cells__SCN1A	Endothelial_cells	SCN1A	1
Endothelial_cells__SCN9A	Endothelial_cells	SCN9A	1
Endothelial_cells__SCN7A	Endothelial_cells	SCN7A	1
Endothelial_cells__STK39	Endothelial_cells	STK39	1
Endothelial_cells__CERS6	Endothelial_cells	CERS6	1
Endothelial_cells__NOSTRIN	Endothelial_cells	NOSTRIN	1
Endothelial_cells__SPC25	Endothelial_cells	SPC25	1
Endothelial_cells__LRP2	Endothelial_cells	LRP2	1
Endothelial_cells__BBS5	Endothelial_cells	BBS5	1
Endothelial_cells__FASTKD1	Endothelial_cells	FASTKD1	1
Endothelial_cells__PPIG	Endothelial_cells	PPIG	1
Endothelial_cells__PHOSPHO2	Endothelial_cells	PHOSPHO2	1
Endothelial_cells__KLHL23	Endothelial_cells	KLHL23	1
Endothelial_cells__METTL5	Endothelial_cells	METTL5	1
Endothelial_cells__UBR3	Endothelial_cells	UBR3	1
Endothelial_cells__GORASP2	Endothelial_cells	GORASP2	1
Endothelial_cells__TLK1	Endothelial_cells	TLK1	1
Endothelial_cells__METTL8	Endothelial_cells	METTL8	1
Endothelial_cells__DCAF17	Endothelial_cells	DCAF17	1
Endothelial_cells__CYBRD1	Endothelial_cells	CYBRD1	1
Endothelial_cells__DYNC1I2	Endothelial_cells	DYNC1I2	1
Endothelial_cells__SLC25A12	Endothelial_cells	SLC25A12	1
Endothelial_cells__HAT1	Endothelial_cells	HAT1	1
Endothelial_cells__METAP1D	Endothelial_cells	METAP1D	1
Endothelial_cells__ITGA6	Endothelial_cells	ITGA6	1
Endothelial_cells__PDK1	Endothelial_cells	PDK1	1
Endothelial_cells__RAPGEF4	Endothelial_cells	RAPGEF4	1
Endothelial_cells__SP3	Endothelial_cells	SP3	1
Endothelial_cells__OLA1	Endothelial_cells	OLA1	1
Endothelial_cells__CIR1	Endothelial_cells	CIR1	1
Endothelial_cells__SCRN3	Endothelial_cells	SCRN3	1
Endothelial_cells__GPR155	Endothelial_cells	GPR155	1
Endothelial_cells__WIPF1	Endothelial_cells	WIPF1	1
Endothelial_cells__CHN1	Endothelial_cells	CHN1	1
Endothelial_cells__ATF2	Endothelial_cells	ATF2	1
Endothelial_cells__HOXD3	Endothelial_cells	HOXD3	1
Endothelial_cells__MTX2	Endothelial_cells	MTX2	1
Endothelial_cells__HNRNPA3	Endothelial_cells	HNRNPA3	1
Endothelial_cells__NFE2L2	Endothelial_cells	NFE2L2	1
Endothelial_cells__AGPS	Endothelial_cells	AGPS	1
Endothelial_cells__RBM45	Endothelial_cells	RBM45	1
Endothelial_cells__OSBPL6	Endothelial_cells	OSBPL6	1
Endothelial_cells__PRKRA	Endothelial_cells	PRKRA	1
Endothelial_cells__PLEKHA3	Endothelial_cells	PLEKHA3	1
Endothelial_cells__TTN	Endothelial_cells	TTN	1
Endothelial_cells__CCDC141	Endothelial_cells	CCDC141	1
Endothelial_cells__SESTD1	Endothelial_cells	SESTD1	1
Endothelial_cells__ZNF385B	Endothelial_cells	ZNF385B	1
Endothelial_cells__CWC22	Endothelial_cells	CWC22	1
Endothelial_cells__UBE2E3	Endothelial_cells	UBE2E3	1
Endothelial_cells__ITGA4	Endothelial_cells	ITGA4	1
Endothelial_cells__PDE1A	Endothelial_cells	PDE1A	1
Endothelial_cells__DNAJC10	Endothelial_cells	DNAJC10	1
Endothelial_cells__FRZB	Endothelial_cells	FRZB	1
Endothelial_cells__NCKAP1	Endothelial_cells	NCKAP1	1
Endothelial_cells__NUP35	Endothelial_cells	NUP35	1
Endothelial_cells__ZNF804A	Endothelial_cells	ZNF804A	1
Endothelial_cells__ZC3H15	Endothelial_cells	ZC3H15	1
Endothelial_cells__ITGAV	Endothelial_cells	ITGAV	1
Endothelial_cells__FAM171B	Endothelial_cells	FAM171B	1
Endothelial_cells__CALCRL	Endothelial_cells	CALCRL	1
Endothelial_cells__TFPI	Endothelial_cells	TFPI	1
Endothelial_cells__GULP1	Endothelial_cells	GULP1	1
Endothelial_cells__COL3A1	Endothelial_cells	COL3A1	1
Endothelial_cells__COL5A2	Endothelial_cells	COL5A2	1
Endothelial_cells__WDR75	Endothelial_cells	WDR75	1
Endothelial_cells__SLC40A1	Endothelial_cells	SLC40A1	1
Endothelial_cells__ASNSD1	Endothelial_cells	ASNSD1	1
Endothelial_cells__ANKAR	Endothelial_cells	ANKAR	1
Endothelial_cells__OSGEPL1	Endothelial_cells	OSGEPL1	1
Endothelial_cells__ORMDL1	Endothelial_cells	ORMDL1	1
Endothelial_cells__PMS1	Endothelial_cells	PMS1	1
Endothelial_cells__C2ORF88	Endothelial_cells	C2ORF88	1
Endothelial_cells__HIBCH	Endothelial_cells	HIBCH	1
Endothelial_cells__INPP1	Endothelial_cells	INPP1	1
Endothelial_cells__MFSD6	Endothelial_cells	MFSD6	1
Endothelial_cells__NEMP2	Endothelial_cells	NEMP2	1
Endothelial_cells__NAB1	Endothelial_cells	NAB1	1
Endothelial_cells__GLS	Endothelial_cells	GLS	1
Endothelial_cells__STAT1	Endothelial_cells	STAT1	1
Endothelial_cells__STAT4	Endothelial_cells	STAT4	1
Endothelial_cells__MYO1B	Endothelial_cells	MYO1B	1
Endothelial_cells__NABP1	Endothelial_cells	NABP1	1
Endothelial_cells__SLC39A10	Endothelial_cells	SLC39A10	1
Endothelial_cells__DNAH7	Endothelial_cells	DNAH7	1
Endothelial_cells__STK17B	Endothelial_cells	STK17B	1
Endothelial_cells__HECW2	Endothelial_cells	HECW2	1
Endothelial_cells__GTF3C3	Endothelial_cells	GTF3C3	1
Endothelial_cells__PGAP1	Endothelial_cells	PGAP1	1
Endothelial_cells__ANKRD44	Endothelial_cells	ANKRD44	1
Endothelial_cells__SF3B1	Endothelial_cells	SF3B1	1
Endothelial_cells__COQ10B	Endothelial_cells	COQ10B	1
Endothelial_cells__HSPD1	Endothelial_cells	HSPD1	1
Endothelial_cells__HSPE1	Endothelial_cells	HSPE1	1
Endothelial_cells__MOB4	Endothelial_cells	MOB4	1
Endothelial_cells__RFTN2	Endothelial_cells	RFTN2	1
Endothelial_cells__PLCL1	Endothelial_cells	PLCL1	1
Endothelial_cells__SATB2	Endothelial_cells	SATB2	1
Endothelial_cells__FTCDNL1	Endothelial_cells	FTCDNL1	1
Endothelial_cells__C2ORF69	Endothelial_cells	C2ORF69	1
Endothelial_cells__TYW5	Endothelial_cells	TYW5	1
Endothelial_cells__SPATS2L	Endothelial_cells	SPATS2L	1
Endothelial_cells__KCTD18	Endothelial_cells	KCTD18	1
Endothelial_cells__AOX1	Endothelial_cells	AOX1	1
Endothelial_cells__BZW1	Endothelial_cells	BZW1	1
Endothelial_cells__CLK1	Endothelial_cells	CLK1	1
Endothelial_cells__PPIL3	Endothelial_cells	PPIL3	1
Endothelial_cells__NIF3L1	Endothelial_cells	NIF3L1	1
Endothelial_cells__ORC2	Endothelial_cells	ORC2	1
Endothelial_cells__FAM126B	Endothelial_cells	FAM126B	1
Endothelial_cells__NDUFB3	Endothelial_cells	NDUFB3	1
Endothelial_cells__CFLAR	Endothelial_cells	CFLAR	1
Endothelial_cells__CASP10	Endothelial_cells	CASP10	1
Endothelial_cells__CASP8	Endothelial_cells	CASP8	1
Endothelial_cells__TRAK2	Endothelial_cells	TRAK2	1
Endothelial_cells__STRADB	Endothelial_cells	STRADB	1
Endothelial_cells__TMEM237	Endothelial_cells	TMEM237	1
Endothelial_cells__ALS2	Endothelial_cells	ALS2	1
Endothelial_cells__NOP58	Endothelial_cells	NOP58	1
Endothelial_cells__BMPR2	Endothelial_cells	BMPR2	1
Endothelial_cells__FAM117B	Endothelial_cells	FAM117B	1
Endothelial_cells__ICA1L	Endothelial_cells	ICA1L	1
Endothelial_cells__WDR12	Endothelial_cells	WDR12	1
Endothelial_cells__CARF	Endothelial_cells	CARF	1
Endothelial_cells__NBEAL1	Endothelial_cells	NBEAL1	1
Endothelial_cells__CYP20A1	Endothelial_cells	CYP20A1	1
Endothelial_cells__ABI2	Endothelial_cells	ABI2	1
Endothelial_cells__RAPH1	Endothelial_cells	RAPH1	1
Endothelial_cells__PARD3B	Endothelial_cells	PARD3B	1
Endothelial_cells__NRP2	Endothelial_cells	NRP2	1
Endothelial_cells__INO80D	Endothelial_cells	INO80D	1
Endothelial_cells__NDUFS1	Endothelial_cells	NDUFS1	1
Endothelial_cells__EEF1B2	Endothelial_cells	EEF1B2	1
Endothelial_cells__ZDBF2	Endothelial_cells	ZDBF2	1
Endothelial_cells__ADAM23	Endothelial_cells	ADAM23	1
Endothelial_cells__FASTKD2	Endothelial_cells	FASTKD2	1
Endothelial_cells__KLF7	Endothelial_cells	KLF7	1
Endothelial_cells__CREB1	Endothelial_cells	CREB1	1
Endothelial_cells__METTL21A	Endothelial_cells	METTL21A	1
Endothelial_cells__CCNYL1	Endothelial_cells	CCNYL1	1
Endothelial_cells__FZD5	Endothelial_cells	FZD5	1
Endothelial_cells__PLEKHM3	Endothelial_cells	PLEKHM3	1
Endothelial_cells__IDH1	Endothelial_cells	IDH1	1
Endothelial_cells__PIKFYVE	Endothelial_cells	PIKFYVE	1
Endothelial_cells__MAP2	Endothelial_cells	MAP2	1
Endothelial_cells__RPE	Endothelial_cells	RPE	1
Endothelial_cells__KANSL1L	Endothelial_cells	KANSL1L	1
Endothelial_cells__ACADL	Endothelial_cells	ACADL	1
Endothelial_cells__LANCL1	Endothelial_cells	LANCL1	1
Endothelial_cells__ERBB4	Endothelial_cells	ERBB4	1
Endothelial_cells__IKZF2	Endothelial_cells	IKZF2	1
Endothelial_cells__SPAG16	Endothelial_cells	SPAG16	1
Endothelial_cells__BARD1	Endothelial_cells	BARD1	1
Endothelial_cells__ATIC	Endothelial_cells	ATIC	1
Endothelial_cells__FN1	Endothelial_cells	FN1	1
Endothelial_cells__MREG	Endothelial_cells	MREG	1
Endothelial_cells__PECR	Endothelial_cells	PECR	1
Endothelial_cells__XRCC5	Endothelial_cells	XRCC5	1
Endothelial_cells__SMARCAL1	Endothelial_cells	SMARCAL1	1
Endothelial_cells__IGFBP2	Endothelial_cells	IGFBP2	1
Endothelial_cells__IGFBP5	Endothelial_cells	IGFBP5	1
Endothelial_cells__TNS1	Endothelial_cells	TNS1	1
Endothelial_cells__ARPC2	Endothelial_cells	ARPC2	1
Endothelial_cells__AAMP	Endothelial_cells	AAMP	1
Endothelial_cells__PNKD	Endothelial_cells	PNKD	1
Endothelial_cells__TMBIM1	Endothelial_cells	TMBIM1	1
Endothelial_cells__SLC11A1	Endothelial_cells	SLC11A1	1
Endothelial_cells__CTDSP1	Endothelial_cells	CTDSP1	1
Endothelial_cells__USP37	Endothelial_cells	USP37	1
Endothelial_cells__ZNF142	Endothelial_cells	ZNF142	1
Endothelial_cells__BCS1L	Endothelial_cells	BCS1L	1
Endothelial_cells__RNF25	Endothelial_cells	RNF25	1
Endothelial_cells__STK36	Endothelial_cells	STK36	1
Endothelial_cells__TTLL4	Endothelial_cells	TTLL4	1
Endothelial_cells__CYP27A1	Endothelial_cells	CYP27A1	1
Endothelial_cells__NHEJ1	Endothelial_cells	NHEJ1	1
Endothelial_cells__CNPPD1	Endothelial_cells	CNPPD1	1
Endothelial_cells__ZFAND2B	Endothelial_cells	ZFAND2B	1
Endothelial_cells__ABCB6	Endothelial_cells	ABCB6	1
Endothelial_cells__ATG9A	Endothelial_cells	ATG9A	1
Endothelial_cells__ANKZF1	Endothelial_cells	ANKZF1	1
Endothelial_cells__STK16	Endothelial_cells	STK16	1
Endothelial_cells__TUBA4A	Endothelial_cells	TUBA4A	1
Endothelial_cells__DNAJB2	Endothelial_cells	DNAJB2	1
Endothelial_cells__DNPEP	Endothelial_cells	DNPEP	1
Endothelial_cells__DES	Endothelial_cells	DES	1
Endothelial_cells__SPEG	Endothelial_cells	SPEG	1
Endothelial_cells__GMPPA	Endothelial_cells	GMPPA	1
Endothelial_cells__CHPF	Endothelial_cells	CHPF	1
Endothelial_cells__OBSL1	Endothelial_cells	OBSL1	1
Endothelial_cells__STK11IP	Endothelial_cells	STK11IP	1
Endothelial_cells__EPHA4	Endothelial_cells	EPHA4	1
Endothelial_cells__SGPP2	Endothelial_cells	SGPP2	1
Endothelial_cells__FARSB	Endothelial_cells	FARSB	1
Endothelial_cells__ACSL3	Endothelial_cells	ACSL3	1
Endothelial_cells__AP1S3	Endothelial_cells	AP1S3	1
Endothelial_cells__WDFY1	Endothelial_cells	WDFY1	1
Endothelial_cells__SERPINE2	Endothelial_cells	SERPINE2	1
Endothelial_cells__FAM124B	Endothelial_cells	FAM124B	1
Endothelial_cells__CUL3	Endothelial_cells	CUL3	1
Endothelial_cells__DOCK10	Endothelial_cells	DOCK10	1
Endothelial_cells__IRS1	Endothelial_cells	IRS1	1
Endothelial_cells__RHBDD1	Endothelial_cells	RHBDD1	1
Endothelial_cells__COL4A4	Endothelial_cells	COL4A4	1
Endothelial_cells__COL4A3	Endothelial_cells	COL4A3	1
Endothelial_cells__MFF	Endothelial_cells	MFF	1
Endothelial_cells__AGFG1	Endothelial_cells	AGFG1	1
Endothelial_cells__SLC19A3	Endothelial_cells	SLC19A3	1
Endothelial_cells__PID1	Endothelial_cells	PID1	1
Endothelial_cells__TRIP12	Endothelial_cells	TRIP12	1
Endothelial_cells__FBXO36	Endothelial_cells	FBXO36	1
Endothelial_cells__SLC16A14	Endothelial_cells	SLC16A14	1
Endothelial_cells__SP110	Endothelial_cells	SP110	1
Endothelial_cells__SP140	Endothelial_cells	SP140	1
Endothelial_cells__SP140L	Endothelial_cells	SP140L	1
Endothelial_cells__SP100	Endothelial_cells	SP100	1
Endothelial_cells__CAB39	Endothelial_cells	CAB39	1
Endothelial_cells__ITM2C	Endothelial_cells	ITM2C	1
Endothelial_cells__PSMD1	Endothelial_cells	PSMD1	1
Endothelial_cells__ARMC9	Endothelial_cells	ARMC9	1
Endothelial_cells__B3GNT7	Endothelial_cells	B3GNT7	1
Endothelial_cells__NCL	Endothelial_cells	NCL	1
Endothelial_cells__PDE6D	Endothelial_cells	PDE6D	1
Endothelial_cells__COPS7B	Endothelial_cells	COPS7B	1
Endothelial_cells__DIS3L2	Endothelial_cells	DIS3L2	1
Endothelial_cells__TIGD1	Endothelial_cells	TIGD1	1
Endothelial_cells__EIF4E2	Endothelial_cells	EIF4E2	1
Endothelial_cells__GIGYF2	Endothelial_cells	GIGYF2	1
Endothelial_cells__INPP5D	Endothelial_cells	INPP5D	1
Endothelial_cells__ATG16L1	Endothelial_cells	ATG16L1	1
Endothelial_cells__DGKD	Endothelial_cells	DGKD	1
Endothelial_cells__USP40	Endothelial_cells	USP40	1
Endothelial_cells__ARL4C	Endothelial_cells	ARL4C	1
Endothelial_cells__SH3BP4	Endothelial_cells	SH3BP4	1
Endothelial_cells__AGAP1	Endothelial_cells	AGAP1	1
Endothelial_cells__IQCA1	Endothelial_cells	IQCA1	1
Endothelial_cells__ACKR3	Endothelial_cells	ACKR3	1
Endothelial_cells__COPS8	Endothelial_cells	COPS8	1
Endothelial_cells__COL6A3	Endothelial_cells	COL6A3	1
Endothelial_cells__MLPH	Endothelial_cells	MLPH	1
Endothelial_cells__RAB17	Endothelial_cells	RAB17	1
Endothelial_cells__LRRFIP1	Endothelial_cells	LRRFIP1	1
Endothelial_cells__RBM44	Endothelial_cells	RBM44	1
Endothelial_cells__RAMP1	Endothelial_cells	RAMP1	1
Endothelial_cells__UBE2F	Endothelial_cells	UBE2F	1
Endothelial_cells__SCLY	Endothelial_cells	SCLY	1
Endothelial_cells__ILKAP	Endothelial_cells	ILKAP	1
Endothelial_cells__PER2	Endothelial_cells	PER2	1
Endothelial_cells__TRAF3IP1	Endothelial_cells	TRAF3IP1	1
Endothelial_cells__ASB1	Endothelial_cells	ASB1	1
Endothelial_cells__TWIST2	Endothelial_cells	TWIST2	1
Endothelial_cells__HDAC4	Endothelial_cells	HDAC4	1
Endothelial_cells__NDUFA10	Endothelial_cells	NDUFA10	1
Endothelial_cells__GPC1	Endothelial_cells	GPC1	1
Endothelial_cells__ANKMY1	Endothelial_cells	ANKMY1	1
Endothelial_cells__RNPEPL1	Endothelial_cells	RNPEPL1	1
Endothelial_cells__SNED1	Endothelial_cells	SNED1	1
Endothelial_cells__MTERF4	Endothelial_cells	MTERF4	1
Endothelial_cells__PASK	Endothelial_cells	PASK	1
Endothelial_cells__PPP1R7	Endothelial_cells	PPP1R7	1
Endothelial_cells__HDLBP	Endothelial_cells	HDLBP	1
Endothelial_cells__FARP2	Endothelial_cells	FARP2	1
Endothelial_cells__STK25	Endothelial_cells	STK25	1
Endothelial_cells__BOK	Endothelial_cells	BOK	1
Endothelial_cells__THAP4	Endothelial_cells	THAP4	1
Endothelial_cells__ATG4B	Endothelial_cells	ATG4B	1
Endothelial_cells__DTYMK	Endothelial_cells	DTYMK	1
Endothelial_cells__ING5	Endothelial_cells	ING5	1
Endothelial_cells__D2HGDH	Endothelial_cells	D2HGDH	1
Endothelial_cells__CHL1	Endothelial_cells	CHL1	1
Endothelial_cells__CNTN6	Endothelial_cells	CNTN6	1
Endothelial_cells__CNTN4	Endothelial_cells	CNTN4	1
Endothelial_cells__TRNT1	Endothelial_cells	TRNT1	1
Endothelial_cells__CRBN	Endothelial_cells	CRBN	1
Endothelial_cells__SUMF1	Endothelial_cells	SUMF1	1
Endothelial_cells__LRRN1	Endothelial_cells	LRRN1	1
Endothelial_cells__SETMAR	Endothelial_cells	SETMAR	1
Endothelial_cells__ITPR1	Endothelial_cells	ITPR1	1
Endothelial_cells__BHLHE40	Endothelial_cells	BHLHE40	1
Endothelial_cells__ARL8B	Endothelial_cells	ARL8B	1
Endothelial_cells__EDEM1	Endothelial_cells	EDEM1	1
Endothelial_cells__LMCD1	Endothelial_cells	LMCD1	1
Endothelial_cells__RAD18	Endothelial_cells	RAD18	1
Endothelial_cells__SRGAP3	Endothelial_cells	SRGAP3	1
Endothelial_cells__THUMPD3	Endothelial_cells	THUMPD3	1
Endothelial_cells__SETD5	Endothelial_cells	SETD5	1
Endothelial_cells__MTMR14	Endothelial_cells	MTMR14	1
Endothelial_cells__BRPF1	Endothelial_cells	BRPF1	1
Endothelial_cells__OGG1	Endothelial_cells	OGG1	1
Endothelial_cells__CAMK1	Endothelial_cells	CAMK1	1
Endothelial_cells__TADA3	Endothelial_cells	TADA3	1
Endothelial_cells__ARPC4	Endothelial_cells	ARPC4	1
Endothelial_cells__TTLL3	Endothelial_cells	TTLL3	1
Endothelial_cells__RPUSD3	Endothelial_cells	RPUSD3	1
Endothelial_cells__JAGN1	Endothelial_cells	JAGN1	1
Endothelial_cells__IL17RC	Endothelial_cells	IL17RC	1
Endothelial_cells__CRELD1	Endothelial_cells	CRELD1	1
Endothelial_cells__EMC3	Endothelial_cells	EMC3	1
Endothelial_cells__FANCD2	Endothelial_cells	FANCD2	1
Endothelial_cells__BRK1	Endothelial_cells	BRK1	1
Endothelial_cells__VHL	Endothelial_cells	VHL	1
Endothelial_cells__IRAK2	Endothelial_cells	IRAK2	1
Endothelial_cells__TATDN2	Endothelial_cells	TATDN2	1
Endothelial_cells__SEC13	Endothelial_cells	SEC13	1
Endothelial_cells__HRH1	Endothelial_cells	HRH1	1
Endothelial_cells__ATG7	Endothelial_cells	ATG7	1
Endothelial_cells__VGLL4	Endothelial_cells	VGLL4	1
Endothelial_cells__TAMM41	Endothelial_cells	TAMM41	1
Endothelial_cells__SYN2	Endothelial_cells	SYN2	1
Endothelial_cells__PPARG	Endothelial_cells	PPARG	1
Endothelial_cells__TSEN2	Endothelial_cells	TSEN2	1
Endothelial_cells__MKRN2	Endothelial_cells	MKRN2	1
Endothelial_cells__RAF1	Endothelial_cells	RAF1	1
Endothelial_cells__CAND2	Endothelial_cells	CAND2	1
Endothelial_cells__IQSEC1	Endothelial_cells	IQSEC1	1
Endothelial_cells__NUP210	Endothelial_cells	NUP210	1
Endothelial_cells__HDAC11	Endothelial_cells	HDAC11	1
Endothelial_cells__FBLN2	Endothelial_cells	FBLN2	1
Endothelial_cells__CHCHD4	Endothelial_cells	CHCHD4	1
Endothelial_cells__TMEM43	Endothelial_cells	TMEM43	1
Endothelial_cells__XPC	Endothelial_cells	XPC	1
Endothelial_cells__LSM3	Endothelial_cells	LSM3	1
Endothelial_cells__SLC6A6	Endothelial_cells	SLC6A6	1
Endothelial_cells__CCDC174	Endothelial_cells	CCDC174	1
Endothelial_cells__FGD5	Endothelial_cells	FGD5	1
Endothelial_cells__NR2C2	Endothelial_cells	NR2C2	1
Endothelial_cells__RBSN	Endothelial_cells	RBSN	1
Endothelial_cells__CAPN7	Endothelial_cells	CAPN7	1
Endothelial_cells__SH3BP5	Endothelial_cells	SH3BP5	1
Endothelial_cells__METTL6	Endothelial_cells	METTL6	1
Endothelial_cells__EAF1	Endothelial_cells	EAF1	1
Endothelial_cells__COLQ	Endothelial_cells	COLQ	1
Endothelial_cells__HACL1	Endothelial_cells	HACL1	1
Endothelial_cells__BTD	Endothelial_cells	BTD	1
[truncated: 22,526 more rows]
