# Supplementary material
Source: Research Square preprint supplement (doi:10.21203/rs.3.rs-9392286/v1)
Supplement: Supplementary file 4 [file 33da83dee66f8cf771d28cfc.xlsx]

## Sheet: Table S17(Hallmark_GSEA_NEcells
Table S17：Hallmark GSEA of Neutrophils in response to Exposure A (test set)
pathway	pval	padj	log2err	ES	NES	size	leadingEdge	leadingEdgeSize	overlap_exposureA_leadingEdge	overlap_frac	neglog10FDR	Direction
HALLMARK_INTERFERON_GAMMA_RESPONSE	0.00872729776251592	0.0610910843376115	0.380730400722792	-0.520935	-1.79517	14	BTG1|B2M|PELI1|IFITM2|NFKBIA|TXNIP|NAMPT|LCP2	8	1	0.125	1.21402216627965	Down (negative NES)
HALLMARK_INFLAMMATORY_RESPONSE	0.0400471142520613	0.110036275695284	0.245041785430996	-0.413783	-1.54186	18	CXCL8|MXD1|LYN|NFKBIA|NAMPT|IL18RAP|LCP2|CSF3R|TLR2	9	5	0.555555555555556	0.958464117231453	Down (negative NES)
HALLMARK_COMPLEMENT	0.0471584038694075	0.110036275695284	0.227987202850442	-0.426403	-1.53283	16	S100A12|LYN|S100A9|USP15|GCA|LCP2	6	1	0.166666666666667	0.958464117231453	Down (negative NES)
HALLMARK_ALLOGRAFT_REJECTION	0.0732009925558313	0.128101736972705	0.183023938384487	-0.425388	-1.46591	14	IFNGR1|B2M|LYN|IL18RAP|LCP2|TLR2|SRGN|SPI1|PTPRC|PRKCB|NCF4	11	3	0.272727272727273	0.892444981476652	Down (negative NES)
HALLMARK_TNFA_SIGNALING_VIA_NFKB	0.403930131004367	0.565502183406113	0.0596037042575973	-0.243887	-1.05284	31	JUNB|MXD1|BTG1|PNRC1|NFKBIA|CFLAR|BCL2A1|NAMPT	8	3	0.375	0.247565713922617	Down (negative NES)
HALLMARK_HYPOXIA	0.640099626400996	0.746782897467829	0.0444181153081573	-0.258289	-0.870752	13	ANXA2|BTG1|PNRC1	3	1	0.333333333333333	0.126805636652792	Down (negative NES)
HALLMARK_APOPTOSIS	0.799501867995019	0.799501867995019	0.0341204536062472	-0.218654	-0.737133	13	IFNGR1|TXNIP|CFLAR	3	1	0.333333333333333	0.0971805172098277	Down (negative NES)

## Sheet: TableS17(Hallmark_GSEA_Encells)
Table S17: Hallmark GSEA of Endothelial Cell in response to Exposure A (test set).
pathway	pval	padj	log2err	ES	NES	size	leadingEdge	leadingEdgeSize	overlap_exposureA_leadingEdge	overlap_frac	neglog10FDR	Direction
HALLMARK_OXIDATIVE_PHOSPHORYLATION	7.75987170991806e-11	3.40723173977881e-09	0.839088935621274	-0.373259	-2.21918	172	NDUFV2|NQO2|ACAT1|ACAA2|ETFA|ATP6V1G1|GRPEL1|CYCS|NDUFA6|CYC1|COX4I1|UQCRFS1|ATP6V1D|GPX4|SLC25A5|DLD|SDHB|BAX|ALAS1|UQCR11|NDUFA7|ECH1|ATP6V1F|ISCU|PRDX3|TIMM10|UQCR10|COX6A1|VDAC1|COX7A2L|COX6C|ISCA1|MGST3|COX6B1|LDHB|NDUFB6|SLC25A6|ECHS1|MTRR|HCCS|SLC25A20|POR|SDHA|NDUFB8|NNT|GPI|TOMM22|ATP6V0E1|SDHC|NDUFA1|DECR1|COX17|VDAC2|UQCRC2|MPC1|MTRF1|AIFM1|MDH1|ETFDH|VDAC3|NDUFS8	61	11	0.180327868852459	8.46759832728199	Down (negative NES)
HALLMARK_EPITHELIAL_MESENCHYMAL_TRANSITION	1.36289269591152e-10	3.40723173977881e-09	0.826657301178302	0.473681318759998	2.09993846027318	168	THBS2|COL1A1|SFRP4|VCAM1|THY1|COL1A2|SDC1|MGP|PDLIM4|MMP14|LUM|POSTN|IGFBP4|LOX|COL5A1|COL6A2|PLOD2|TNC|ECM1|NNMT|MMP2|COL6A3|FBLN1|FSTL3|COL5A2|COL16A1|ITGA2|SLIT2|BMP1|BGN|GPC1|FUCA1|CTHRC1|FBLN2|SPP1|DST|WNT5A|TGM2|COL4A1|CDH11|FAP|PCOLCE|SGCB|COL7A1|LOXL1|IL32|ITGB3|ELN|SLIT3|PMEPA1|DCN|IGFBP2|SPARC|CD59|FSTL1|PFN2|COL3A1|SGCD|CXCL12|DPYSL3|FBN1|CALD1|ECM2|RHOB|EFEMP2|COL4A2|TIMP3|ITGB5|TGFBI…	71	16	0.225352112676056	8.46759832728199	Up (positive NES)
HALLMARK_COAGULATION	1.08502153309847e-06	1.80836922183078e-05	0.643551836150722	0.485017759578508	2.00449987660654	89	CFH|MMP14|MMP7|CTSK|MMP2|A2M|CTSE|LGMN|ITGA2|RAPGEF3|CLU|BMP1|C1R|CFI|C3|F3|CAPN2|PRSS23|S100A13|C1S|DUSP6|ITGB3|DUSP14|PLAT|F8|SPARC|CAPN5|VWF|CFD|USP11|FBN1	31	15	0.483870967741936	4.7427128932009	Up (positive NES)
HALLMARK_APICAL_JUNCTION	2.14454931658151e-05	0.000268068664572688	0.575610261071129	0.399143144663093	1.75445052343528	154	MDK|ACTG1|IRS1|VCAM1|THY1|ITGA9|PKD1|MMP2|ITGB4|CDH3|COL16A1|LIMA1|NLGN2|ITGA2|SLIT2|CLDN7|BMP1|ADAM15|ADAM23|CLDN4|PCDH1|MPZL2|JUP|CDH11|ITGA3|DLG1|CDH1|NF2|ITGA10|CX3CL1|ALOX15B|MAPK11|ICAM5|AKT2|SGCE|BAIAP2|VWF|EGFR|CTNND1|JAM3|PIK3R3|FBN1|EXOC4|CD276|RASA1|PARVA|TIAL1|CDK8|TGFBI|TAOK2|CLDN11|SORBS3|MAPK14|ADAM9|PECAM1|GNAI1|TJP1|GAMT|TSPAN4|NFASC|ACTN4|ZYX|VCL|SDC3|SHC1|PARD6G|CD274|INPPL1|LA…	77	19	0.246753246753247	3.57175394915971	Up (positive NES)
HALLMARK_ALLOGRAFT_REJECTION	2.74984107995716e-05	0.000274984107995716	0.575610261071129	-0.328878	-1.88597	119	LCK|CD3D|UBE2D1|GZMA|LY86|TPD52|IFNGR2|NCF4|ZAP70|CD247|WAS|PTPRC|IRF8|KLRD1|TLR2|IFNGR1|NLRP3|B2M|CFP|RIPK2|CTSS|STAT4|CD2|SOCS1|FAS|CAPG|CD96|LTB|IL18|CCL2|CD74|GPR65|SPI1	33	14	0.424242424242424	3.56069240438501	Down (negative NES)
HALLMARK_UV_RESPONSE_DN	7.08778098405257e-05	0.000590648415337715	0.538434096309916	0.406229555699016	1.75895465479181	132	IRS1|COL1A1|COL1A2|MMP16|CDON|LTBP1|FHL2|COL5A2|SYNE1|SMAD3|F3|NFIB|IGFBP5|ID1|MET|DLG1|RBPMS|ITGB3|BHLHE40|MYC|SYNJ2|MAP2K5|COL3A1|PIK3R3|CDK13|SPOP|TGFBR2|DDAH1|TGFBR3|ICA1|SLC7A1|YTHDC1|DBP|MAPK14|KIT|PMP22|TJP1|ATRN|EFEMP1|SLC22A18|SIPA1L1|RUNX1|MAP1B|CDC42BPA|BMPR1A|PLPP3|ADD3|CAP2|GJA1|TFPI|MGLL|HAS2|IGF1R|ANXA4|DYRK1A|PIAS3|APBB2|SERPINE1|MTA1|ERBB2	60	24	0.4	3.22867095687616	Up (positive NES)
HALLMARK_MYOGENESIS	0.000115705630009279	0.000826468785780565	0.538434096309916	0.397260681581793	1.71842822330381	131	PC|COL1A1|IGFBP7|NAV2|DMPK|COL15A1|APP|COL6A2|ERBB3|ITGB4|COL6A3|AGRN|CLU|ABLIM1|SSPN|PLXNB2|EFS|APLNR|BHLHE40|KLF5|PDLIM7|MEF2C|MAPRE3|SPARC|AKT2|IGF1|CKB|PSEN2|COL3A1|SGCD|CFD|AGL|TSC2|PICK1|MYO1C|DMD|SMTN|COL4A2|ITGB5|SPTAN1|TEAD4|LPIN1|SORBS3|MYL6B|DAPK2|IGFBP3|SLC6A8|FGF2|WWTR1	49	8	0.163265306122449	3.08277354429368	Up (positive NES)
HALLMARK_ESTROGEN_RESPONSE_EARLY	0.000152181761707011	0.000951136010668817	0.518848077743792	0.37982141121902	1.67538157803321	159	NAV2|OLFML3|IGFBP4|FOXC1|OLFM1|DHRS3|FHL2|UGCG|TPBG|NBL1|JAK2|KRT19|CLDN7|ABLIM1|FLNB|KRT18|TJP3|TGM2|KRT8|MUC1|PRSS23|INHBB|EGR3|CANT1|KRT15|IL6ST|SCNN1A|RHOD|BHLHE40|MYC|FRK|ELF3|SFN|MAST4|AKAP1|SLC1A4|CXCL12|SLC2A1|RAPGEFL1|FARP1|SLC16A1|ESRP2|CCND1|SLC26A2|SYBU|XBP1|KLF10|SLC24A3|CBFA2T3|ALDH3B1|KAZN|SLC22A5|AR|CELSR1|MED24|SNX24|TFF3|AFF1|SLC7A2|ADD3|GJA1|NCOR2|AMFR|KLK10|ABHD2|IGF1R|PDLIM3|…	71	23	0.323943661971831	3.02175737532401	Up (positive NES)
HALLMARK_FATTY_ACID_METABOLISM	0.000257099310118897	0.00142832950066054	0.49849310876659	-0.285198	-1.64928	124	ACAA2|MIF|CA2|LGALS1|DLD|IDI1|ACSL1|HSDL2|HPGD|ECH1|CA4|PSME1|ACSM3|ACADL|HSD17B4|NBN|GLUL|ECHS1|HMGCL|HCCS|SDHA|S100A10|SDHC|ALAD|MAOA|G0S2|PTS|DECR1|ACAT2|OSTC|ACADS|MDH1|ETFDH|AADAT|UROS|BLVRA|PRDX6|YWHAH|ADSL|ACADM|IDH1|ACOT8	42	13	0.30952380952381	2.84517159381229	Down (negative NES)
HALLMARK_TNFA_SIGNALING_VIA_NFKB	0.000286242553335401	0.00143121276667701	0.49849310876659	-0.25613	-1.52932	175	NINJ1|NFKBIE|PDE4B|CD83|IFNGR2|CXCL2|SDC4|FOS|KLF2|TNFAIP8|ZC3H12A|CD44|PPP1R15A|BCL2A1|EHD1|KLF6|TLR2|BMP2|BTG3|CEBPB|NAMPT|RIPK2|LITAF|NR4A3|ID2|EIF1|KYNU|CDKN1A|SLC16A6|PHLDA1|DUSP1|MAP3K8|PTPRE|PLAUR|PLEK|IL7R|BTG1|IL18|SOD2|KLF4|CCL2|SAT1|NFKBIA|MCL1|JUNB|AREG|MAP2K3|TANK|G0S2|SLC2A3|OLR1	51	20	0.392156862745098	2.8443	Down (negative NES)
HALLMARK_ADIPOGENESIS	0.00102565159620773	0.00466205271003512	0.45505986738723	-0.244072	-1.45732	175	ACAA2|GHITM|REEP5|DDT|GRPEL1|ATP1B3|CYC1|TALDO1|GPX4|DLD|SDHB|UQCR11|APLP2|ECH1|IFNGR1|GPAT4|FAH|PRDX3|MCCC1|UQCR10|LPL|COX6A1|ACADL|CMPK1|GPX3|MGST3|ECHS1|BCL2L13|DHRS7|POR|PIM3|G3BP2|UBC|APOE|SDHC|TANK|CYP4B1|DECR1|ACADS|AIFM1|PEX14|SULT1A1|DRAM2|SLC1A5|CD302|PPP1R15B|CAT|NDUFB7	48	11	0.229166666666667	2.33142282057349	Down (negative NES)
HALLMARK_COMPLEMENT	0.00191962341778782	0.00799843090744925	0.45505986738723	-0.242873	-1.43358	155	LCK|GZMA|GNG2|ANXA5|CA2|GCA|CD55|STX4|GNAI2|WAS|CASP1|RABIF|RHOG|EHD1|CEBPB|CTSS|CTSL|USP16|ATOX1|LIPA|KYNU|KCNIP2|CTSC|PLAUR|PLEK|GNB2|PSMB9|GMFB|CTSD|SPOCK2|AKAP10|HSPA5|PFN1|LTA4H|LGALS3|CTSB|DOCK10|PCLO|MMP15|OLR1|APOBEC3G|TIMP2|LYN|CDH13|CALM1|DPP4|FYN	47	14	0.297872340425532	2.09699520239225	Down (negative NES)
HALLMARK_KRAS_SIGNALING_DN	0.00449984789418204	0.0160708853363644	0.407017918923954	0.400942871282106	1.61324417424564	71	SLC25A23|TCF7L1|ZBTB16|DTNB|SPHK2|SLC16A7|KRT15|ENTPD7|THRB|GTF3C5|SYNPO|BMPR1B|COPZ2|IFI44L|IGFBP2|PDK2|CDKAL1|CYP39A1|KRT5|KMT2D|EDN1|CCDC106|TENM2|TFCP2L1|BTG2|THNSL2|MTHFR	27	3	0.111111111111111	1.79396019752996	Up (positive NES)
HALLMARK_ESTROGEN_RESPONSE_LATE	0.00434346892450516	0.0160708853363644	0.407017918923954	0.343706644235785	1.50309622973457	141	MDK|XRCC3|IGFBP4|FOXC1|OLFM1|TPBG|NBL1|JAK2|KRT19|FLNB|SLC29A1|TJP3|KLK11|PRSS23|EGR3|CDH1|PERP|IL6ST|SCNN1A|HSPA4L|ALDH3A2|TSPAN13|FRK|SFN|CKB|SLC1A4|CXCL12|RAPGEFL1|AGR2|TRIM29|FARP1|SLC16A1|CCND1|HOMER2|SLC26A2|XBP1|DCXR|SLC24A3|ST6GALNAC2|DLG5|ALDH3B1|SERPINA1|SLC22A5|TFF3|UGDH|LSR|AFF1|MEST|SLC2A8|ADD3|NCOR2|AMFR|KLK10|TST|UNC13B|ABHD2|BATF|PDLIM3|GALE|EMP2|NAB2|MYOF|TIAM1|GPER1|ST14|LAMC2|R…	68	20	0.294117647058824	1.79396019752996	Up (positive NES)
HALLMARK_HEDGEHOG_SIGNALING	0.00908100205025746	0.0283781314070546	0.380730400722792	0.506624559513684	1.65336993427468	25	THY1|OPHN1|UNC5C|NRP2|PML|RASA1|RTN1|CDK6|CELSR1|DPYSL2|ADGRG1|ETS2|TLE1|HEY2|VEGFA|HEY1|TLE3|CRMP1|MYH9	19	2	0.105263157894737	1.5470162045911	Up (positive NES)
HALLMARK_CHOLESTEROL_HOMEOSTASIS	0.00856110403476573	0.0283781314070546	0.380730400722792	-0.289339	-1.46323	67	S100A11|ANXA5|MVD|FABP5|IDI1|HMGCR|ECH1|SCD|CXCL16|LPL|GUSB|PLAUR|ATF5|FBXO6|TRIB3|LGALS3|CYP51A1|ALCAM|ACAT2	19	2	0.105263157894737	1.5470162045911	Down (negative NES)
HALLMARK_MTORC1_SIGNALING	0.0103719344697706	0.0305056896169724	0.380730400722792	-0.217679	-1.29773	176	SERP1|CORO1A|INSIG1|IFI30|SDF2L1|SORD|ATP6V1D|TOMM40|IDI1|UCHL5|PPP1R15A|HMGCR|CFP|SCD|NAMPT|UBE2D3|DDIT4|CTSC|CDKN1A|EIF2S2|SLA|MTHFD2|GMPS|TUBA4A|RAB1A|PSMD12|M6PR|GPI|TRIB3|HSPA5|GTF2H1|LTA4H|CYP51A1|EEF1E1|PSMD14|MAP2K3|ACTR2|SLC2A3|GLRX|G6PD|FADS1|PGK1|EDEM1|RPN1|YKT6|SLC1A5|ENO1|DDIT3|TM7SF2|FGL2|SRD5A1|SSR1|TXNRD1	53	22	0.415094339622642	1.51561915282336	Down (negative NES)
HALLMARK_INFLAMMATORY_RESPONSE	0.027163326030003	0.0754536834166749	0.352487857583619	-0.219102	-1.29152	152	P2RX4|LCK|EMP3|C5AR1|CXCL8|ADRM1|PDE4B|IFNGR2|LAMP3|CSF3R|CD55|SEMA4D|RHOG|GNA15|NMI|KLF6|TLR2|CYBB|SLC31A2|NLRP3|NAMPT|PTGER2|RIPK2|AQP9|GPR132|CDKN1A|BEST1|TNFRSF1B|PTPRE|PLAUR|IL7R	31	13	0.419354838709677	1.12231955445049	Down (negative NES)
HALLMARK_WNT_BETA_CATENIN_SIGNALING	0.0362079922354627	0.0862095053225301	0.321775918075361	0.42948248328334	1.50348268274444	34	DLL1|HDAC11|TP53|JAG1|CUL1|LEF1|AXIN2|MYC|CSNK1E|PSEN2	10	5	0.5	1.06444484691849	Up (positive NES)
HALLMARK_NOTCH_SIGNALING	0.0357583230579531	0.0862095053225301	0.266350657088526	0.435226965661337	1.48822001662256	30	DLL1|HEYL|WNT5A|JAG1|CUL1|PSEN2|CCND1|FBXW11|MAML2|DTX2|NOTCH3|PSENEN|WNT2	13	6	0.461538461538462	1.06444484691849	Up (positive NES)
HALLMARK_ANGIOGENESIS	0.0350877192982456	0.0862095053225301	0.271288554688953	0.438210761390795	1.46919625523201	28	APP|LUM|POSTN|TNFRSF21|COL5A2|SPP1|JAG1|SLCO2A1|FSTL1|COL3A1	10	2	0.2	1.06444484691849	Up (positive NES)
HALLMARK_MYC_TARGETS_V2	0.0501165501165501	0.113901250264887	0.216542836735348	0.364641263631891	1.39990201310796	53	NOLC1|WDR74|PPAN|NOP56|HK2|UTP20|MYC|CDK4|LAS1L|TCOF1|NIP7|NOP2|IPO4|DCTPP1|BYSL|PUS1|MYBBP1A|MPHOSPH10|NOC4L|NOP16|PES1|PPRC1|PA2G4|WDR43|SRM|TMEM97|MRTO4	27	4	0.148148148148148	0.943471508755306	Up (positive NES)
HALLMARK_GLYCOLYSIS	0.0656779661016949	0.142778187177598	0.178219874951973	0.290124114330515	1.27713212100197	158	PC|CHPF|EGLN3|SDC1|GMPPB|COL5A1|P4HA2|PLOD2|GCLC|AGRN|MXI1|TPBG|NASP|FUT8|GPC1|MET|HS2ST1|HK2|XYLT2|PAM|NOL3|PFKP|DCN|ZNF292|CAPN5|B4GALT4|ELF3|EGFR|AGL|SLC37A4|HS6ST2|PMM2|CHPF2|PGM2|TGFBI|CASP6|QSOX1|EXT2|STC1|ALDH7A1|IGFBP3|MED24|PYGB|GPC4|TFF3|ERO1A|PPP2CB|CYB5A|CLN6|PPIA|RPE|RBCK1|GFPT1|EXT1|PGLS|GOT2|SDC3|PAXIP1|HDLBP|GALE	60	13	0.216666666666667	0.845338136481389	Up (positive NES)
HALLMARK_APICAL_SURFACE	0.0704573547589617	0.146786155747837	0.186432558434075	0.409758247624708	1.38802725794368	29	THY1|APP|CROCC|ADAM10|CX3CL1|EFNA5|SULF2|HSPB1|ATP8B1|FLOT2|EPHB4|SRPX|DCBLD2	13	3	0.230769230769231	0.833314903315368	Up (positive NES)
HALLMARK_MITOTIC_SPINDLE	0.0938477580813347	0.187695516162669	0.14551614609036	0.280182033007589	1.24533189468298	175	TUBGCP6|OPHN1|FLNB|MID1|FGD6|DST|STAU1|CTTN|MYO1E|DLG1|NUMA1|SYNPO|KIF3B|PXN|TLK1|ARHGEF12|ARFGEF1|PLEKHG2|SORBS2|RASAL2|FARP1|CEP131|RASA1|BCR|WASF2|MARCKS|SAC3D1|MARK4|CLIP1|NEDD9|TAOK2|SPTAN1|SPTBN1|PALLD|RANBP9|CNTROB|ATG4B|CYTH2|KATNA1|SASS6|MAP3K11|CEP192|CLASP1|CDC42BPA|CENPJ|ACTN4|ARFIP2|UXT|RICTOR|ARHGAP27|VCL|KIF3C|TBCD|CDC42EP4|NCK1|SMC4|HOOK3|YWHAE|TIAM1|MAP1S|KIFAP3|ARHGAP5|RAB3GAP1|…	64	9	0.140625	0.726546102067358	Up (positive NES)
HALLMARK_P53_PATHWAY	0.131386861313869	0.252667040988209	0.120433371642259	0.271214955803784	1.20547570860241	175	DGKA|STEAP3|ZBTB16|FDXR|SDC1|APP|ITGB4|KRT17|TRAFD1|FUCA1|EPHX1|RAP2B|PRKAB1|SLC35D1|INHBB|TP53|HEXIM1|PLXNB2|ATF3|RAD9A|RAB40C|PERP|ZMAT3|ALOX15B|PTPN14|TM7SF3|HSPA4L|EPS8L2|CTSF|CSRNP2|NDRG1|SFN|BAIAP2|WWP1|TSC22D1|ACVR1B|EPHA2|FOXO3|CD81|RRAD|EI24|TAP1|JAG2|BTG2|TSPYL2|DCXR	46	14	0.304347826086957	0.5974514056879	Up (positive NES)
HALLMARK_KRAS_SIGNALING_UP	0.158006362672322	0.282154219057719	0.109250039480711	0.270845255882156	1.18975595084793	151	TRIB2|CXCL10|MAP7|CFH|CROT|CMKLR1|ALDH1A3|ITGA2|IL33|FUCA1|ST6GAL1|SPP1|TSPAN7|MPZL2|JUP|KCNN4|PLVAP|DUSP6|TRIB1|EVI5|PIGR|CAB39L|PLAT|CDADC1|TSPAN13|ADGRL4|TSPAN1|AVL9|AKT2|BTBD3|TMEM176B|PTBP2|SPON1|SPARCL1|GADD45G	35	13	0.371428571428571	0.549513451331255	Up (positive NES)
HALLMARK_IL2_STAT5_SIGNALING	0.153444676409186	0.282154219057719	0.110122263835536	0.267947751055447	1.18796391147537	166	CXCL10|TNFRSF21|ECM1|SH3BGRL2|PRAF2|DHRS3|GBP4|TWSG1|PTH1R|SELP|SPP1|ITGA6|TGM2|MUC1|COL6A1|MYO1E|UMPS|HK2|BHLHE40|MYC|IKZF4|LCLAT1|NDRG1|ST3GAL4|PLPP1|BMPR2|PLAGL1|TNFSF10|SPRY4|AHR|CDCP1|WLS|RHOB|MYO1C|CSF1|CD81|IL4R|XBP1|ODC1|AHNAK|IRF6|NOP2|BCL2L1|ITIH5|IL3RA|RGS16|CKAP4|CASP3|IGF1R|ITGAV|BATF|ANXA4|RABGAP1L|MAP6|EMP1|PRNP|PUS1|CCND2|UCK2|SWAP70|PLEC|LRIG1|TIAM1	63	21	0.333333333333333	0.549513451331255	Up (positive NES)
HALLMARK_REACTIVE_OXYGEN_SPECIES_PATHWAY	0.227544910179641	0.382689556509299	0.231126709673834	-0.24928	-1.16042	44	LAMTOR5|CDKN2D|FTL|NDUFA6|GPX4|ATOX1|GPX3|SOD2|JUNB|GLRX2|HMOX2|GLRX|G6PD|PRDX6|CAT|TXNRD1	16	4	0.25	0.417153389388434	Down (negative NES)
HALLMARK_G2M_CHECKPOINT	0.229613733905579	0.382689556509299	0.0875697115548511	0.259794525934628	1.12982060507773	135	HMGB3|NASP|NOLC1|SLC12A2|SMAD3|HIRA|HNRNPD|PDS5B|PURA|CUL1|NUMA1|PRIM2|EFNA5|MYC|KMT5A|RASAL2|UPF1|PML|CDK4|FOXN3|CCND1|TRA2B|DMD|MARCKS|ODC1|SLC7A1|YTHDC1|NUP98|KATNA1|MAPK14|ILF3|PRMT5|CKS1B|LIG3|SMARCC1|KPNB1|SMC4|HSPA8|UCK2|CASP8AP2|SFPQ|MNAT1|TOP1|BARD1|CUL3|TMPO|RBM14|MT2A|CDKN1B|DTYMK|ABL1|MCM3|NUP50|KIF22|CBX1|XPO1|MEIS2|DKC1|TLE3|SYNCRIP	60	22	0.366666666666667	0.417153389388434	Up (positive NES)
HALLMARK_HYPOXIA	0.294736842105263	0.475382003395586	0.0732558655828455	0.248620700588272	1.09883428058302	161	PPARGC1A|LOX|COL5A1|P4HA2|PGF|TMEM45A|MXI1|CP|TPBG|TGFB3|BGN|GPC1|F3|TGM2|WSB1|ATF3|SELENBP1|HK2|BHLHE40|PAM|NDST1|PFKP|DCN|ZNF292|NDRG1|EFNA1|ATP7A|EGFR|CHST3|SLC2A1|SLC37A4|LXN|FOXO3|AMPD3|PGM2|TGFBI|CASP6|NEDD4L|AKAP12|STC1|IGFBP3|GPC4|ERO1A|EXT1|XPNPEP1|CSRP2|SDC3|ACKR3|HDLBP|SRPX|PKP1|IL6|SERPINE1|ILVBL|HS3ST1|KLF7|GBE1|CCNG2|STC2|ENO2|RRAGD|MT2A|AK4|SCARB1|CDKN1B|MAP3K1|FOSL2|PLIN2|VEGFA|MT…	73	23	0.315068493150685	0.322957263444882	Up (positive NES)
HALLMARK_INTERFERON_ALPHA_RESPONSE	0.329268292682927	0.514481707317073	0.0702812841717392	0.261710279751032	1.0900755334471	92	CXCL10|NCOA7|TRAFD1|GBP4|HERC6|IRF1|SLC25A28|STAT2|C1S|PARP14|IFITM1|RTP4|IFI44L|MOV10|CD47|PARP9|DDX60|GBP2|CSF1|IL4R|TAP1|CNP|IFI44|ADAR|BST2|UBA7|IRF7|IFIH1|TRIM14|LAP3|IL15|IFIT3	32	7	0.21875	0.288630062208617	Up (positive NES)
HALLMARK_ANDROGEN_RESPONSE	0.386917960088692	0.586239333467715	0.0623861492893626	0.253139702320661	1.05437736838744	92	MAP7|ALDH1A3|KRT19|ARID5B|DHCR24|KRT8|ABCC4|SLC38A2|ZBTB10|BMPR1B|PMEPA1|SRF|LMAN1|NDRG1|PLPP1|TSC22D1|ADAMTS1|CCND1|HOMER2|SLC26A2|LIFR|CDK6|MAK|APPBP2|AKAP12|CDC14B|PGM3|AKT1|MAF|SEC24D|TMPRSS2|ABHD2|PIAS1|ITGAV	34	7	0.205882352941176	0.231925046124631	Up (positive NES)
HALLMARK_APOPTOSIS	0.418629550321199	0.612005365526492	0.0570059526582387	0.237367124058317	1.03805275579787	141	FDXR|APP|LUM|WEE1|ERBB3|MMP2|CLU|KRT18|BGN|IRF1|EGR3|ATF3|SLC20A1|PPP2R5B|LEF1|PLAT|DCN|RNASEL|CD38|PSEN2|TNFSF10|GCH1|DAP|CREBBP|ADD1|PAK1|CCND1|RHOB|TIMP3|HSPB1|TAP1|BTG2|NEDD9|SPTAN1|TGFBR3|CASP6	36	11	0.305555555555556	0.213244770324482	Up (positive NES)
HALLMARK_TGF_BETA_SIGNALING	0.428403755868545	0.612005365526492	0.0602484086158019	0.270490171976018	1.03323236092588	52	ACVR1|SMAD3|ID1|CDH1|SLC20A1|PMEPA1|ARID4B|LTBP2|BMPR2|KLF10|SMURF1|SPTBN1|TJP1|WWTR1|BMPR1A|TGFBR1|NCOR2|TRIM33|SERPINE1	19	13	0.68421052631579	0.213244770324482	Up (positive NES)
HALLMARK_SPERMATOGENESIS	0.504694835680751	0.700965049556599	0.0525898950623616	0.255733208293117	0.984488939267634	54	MAP7|SLC12A2|NF2|HSPA4L|PACRG|JAM3|MLF1|SIRT1|NPHP1|PSMG1|LPIN1|CFTR|ZC3H14|CCT6B|IFT88	15	4	0.266666666666667	0.154303635618382	Up (positive NES)
HALLMARK_INTERFERON_GAMMA_RESPONSE	0.536458333333333	0.721324050035403	0.0443293451680314	0.219564519913494	0.976109286219884	173	CXCL10|VCAM1|CFH|NLRC5|SECTM1|CMKLR1|TRAFD1|GBP4|JAK2|HERC6|IDO1|ARID5B|IRF1|C1R|SELP|SSPN|SLC25A28|STAT2|C1S|PARP14|STAT1|RTP4|IFI44L|PFKP|CD38|PML|TNFSF10|GCH1|OAS3|OAS2|DDX60|IL4R|TAP1|XAF1|VAMP5|CD40|IFI44|EIF4E3|ADAR|BST2|RNF213|SOCS3|IRF7|IFIH1|NOD1|TRIM14|LAP3|RBCK1|CASP3|LATS2|IL15	51	18	0.352941176470588	0.141869587533294	Up (positive NES)
HALLMARK_PROTEIN_SECRETION	0.548206278026906	0.721324050035403	0.0466948041282054	0.233956371796018	0.966903807406915	89	ERGIC3|TSPAN8|KRT18|SSPN|DST|ADAM10|RER1|PAM|AP2B1|ARFGEF1|LMAN1|ATP7A|EGFR|CLCN3|ATP1A1|SCRN1|GALC|VPS45|GBF1|ICA1|ABCA1	21	4	0.19047619047619	0.141869587533294	Up (positive NES)
HALLMARK_E2F_TARGETS	0.597014925373134	0.765403750478377	0.0404934829859503	0.217112090343501	0.951678337306186	144	HMGB3|POLD1|WEE1|HELLS|PRDX4|NASP|NOLC1|RPA1|LIG1|HNRNPD|PDS5B|TP53|RPA3|NOP56|PRIM2|RBBP7|MYC|BRMS1L|CDK4|MXD3|TFRC|TRA2B|MMS22L|DEK|PAICS|SSRP1|ILF3|DCTPP1|NUP153|CSE1L|CKS1B|ZW10|POP7|WDR90|SMC4|RAD50|PNN|MLH1|CCP110|NUP205|ING3|DUT|BARD1|ORC2|TMPO|DNMT1|PA2G4|CDKN1B|MCM3|KIF22|PCNA|XPO1|NUP107|SNRPB|SYNCRIP|NME1|RAD21|HMGA1|POLE|RAD51C|PPP1R8|KPNA2|DDX39A	63	17	0.26984126984127	0.116109414063344	Up (positive NES)
HALLMARK_IL6_JAK_STAT3_SIGNALING	0.651927437641723	0.814909297052154	0.0392758570896778	0.22345562909422	0.893265825769006	68	CXCL10|TNFRSF21|A2M|OSMR|IRF1|STAT2|STAT1|IL6ST|ITGB3|CD38|ACVR1B|PDGFC|IL1R1|CSF1|IL4R	15	8	0.533333333333333	0.0888907274341328	Up (positive NES)
HALLMARK_BILE_ACID_METABOLISM	0.727777777777778	0.887533875338753	0.0331626424471441	0.210511528286418	0.862151161657376	80	NUDT12|RBP1|FDXR|CROT|ABCA5|GSTK1|SLC29A1|DHCR24|EFHC1|CYP46A1|ABCA6|CYP39A1|ABCA8|TFCP2L1|ABCD3|EPHX2	16	1	0.0625	0.0518150618312586	Up (positive NES)
HALLMARK_HEME_METABOLISM	0.777777777777778	0.925925925925926	0.0274480081801021	0.193294772266026	0.849635322349533	154	PC|P4HA2|GCLC|CTSE|MXI1|C3|FBXO34|ERMAP|SELENBP1|LRP10|BTRC|PPP2R5B|PIGQ|ARHGEF12|BCAM|TFDP2|RBM5|SLC11A2|ACKR1|CLCN3|NFE2L1|SLC2A1|TNRC6B|ADD1|TFRC|RANBP10|HDGF|UBAC1|FOXO3|BTG2|BMP2K	31	8	0.258064516129032	0.0334237554869497	Up (positive NES)
HALLMARK_UNFOLDED_PROTEIN_RESPONSE	0.829545454545455	0.953864123029005	0.163180127180689	-0.146341	-0.820852	102	SERP1|CNOT4|YWHAZ|EXOSC1|EIF4A3|DCP2|CEBPB|GOSR2|FKBP14|DDIT4|DNAJC3|MTHFD2|CCL2|HSPA5|EDC4|SLC30A5|NOP14|ERN1|EIF4EBP1|EXOSC4|EDEM1|IFIT1	22	6	0.272727272727273	0.0205134856958235	Down (negative NES)
HALLMARK_XENOBIOTIC_METABOLISM	0.839400428265525	0.953864123029005	0.0240035948793451	0.186666742078148	0.816330091198413	141	PC|IGFBP4|GCLC|PTGDS|TKFC|FBLN1|NFS1|CROT|ATOH8|AOX1|LCAT|EPHX1|SLC35D1|JUP|IGF1|TMEM176B|GCH1|CNDP2|ENPEP|SPINT2|MCCC2|IL1R1|EPHA2|ABCC3|DCXR|ATP2A2|PROS1|CASP6|PGRMC1|GSS|UPB1|SHMT2|UGDH|MTHFD1|CYB5A|ENTPD5|GSTM4	37	11	0.297297297297297	0.0205134856958235	Up (positive NES)
HALLMARK_DNA_REPAIR	0.875268817204301	0.972520908004779	0.0218679438176212	0.180661242616563	0.787978708734699	138	POLD1|POLR1C|POLL|TAF1C|ITPA|AAAS|LIG1|TP53|CANT1|TYMS|RPA3|POLR2F|SF3A3|GTF3C5|UMPS|BCAM|NME4|GTF2H3|USP11|GTF2H5|IMPDH2|SNAPC4|SAC3D1|VPS28|NT5C|POLR2A|SSRP1|GMPR2|NELFB|RRM2B|TAF10|NFX1|SRSF6|SUPT5H|CETN2|POLH|DDB1|NME3|SNAPC5|NELFE|NELFCD|SMAD5|DUT|ERCC4|ERCC3|PNP|TK2|ELL|TARBP2|POM121|EDF1|GTF2A2	52	12	0.230769230769231	0.0121010531040588	Up (positive NES)
HALLMARK_UV_RESPONSE_UP	0.90249187432286	0.980969428611805	0.0204893625108019	0.179643177659335	0.770071000846145	123	NTRK3|MMP14|OLFM1|POLG2|PTPRD|IRF1|EPHX1|HYAL2|ATF3|IL6ST|NR4A1|IGFBP2|STK25|FGF18|GCH1|TFRC|DDX21|MGAT1|RHOB|RRAD|TAP1|BTG2|CNP|MARK2|RXRB	25	8	0.32	0.00834452696467975	Up (positive NES)
HALLMARK_MYC_TARGETS_V1	0.961538461538461	0.99009900990099	0.199915231309662	-0.134676	-0.798468	161	CNBP|PSMB3|UBE2L3|CYC1|BUB3|RSL1D1|AP3S1|GSPT1|UBE2E1|PRDX3|SNRPD2|VDAC1|SRSF2|SNRPA1|NCBP2|EIF2S2|PCBP1|CBX3|GLO1|RAD23B|PSMD8	21	10	0.476190476190476	0.00432137378264258	Down (negative NES)
HALLMARK_PEROXISOME	0.99009900990099	0.99009900990099	0.137250779610133	-0.124788	-0.653448	82	CNBP|IDI1|ACSL1|ECH1|ABCD1|HSD17B4|PEX6|HMGCL|CLN8|SOD2|SCGB1A1|FADS1|PEX14|VPS4B|SLC25A17|CAT|YWHAH|IDH1|ACOT8|ABCB9|ALDH9A1|BCL10|SCP2|ECI2|SLC25A19|MLYCD|ITGB1BP1	27	7	0.259259259259259	0.00432137378264258	Down (negative NES)
HALLMARK_PI3K_AKT_MTOR_SIGNALING	0.982281284606866	0.99009900990099	0.016356070983033	0.149608176375729	0.623998136516088	93	STAT2|CAB39L|SFN|EGFR|CDK4|SLC2A1|MAPK8|PIK3R3|TSC2|THEM4|GNA14|SMAD2|IRAK4|CALR|AKT1|CSNK2B|PLCB1|NOD1|AKT1S1|ACACA|ATF1|NCK1|TIAM1|PAK4|TRAF2|HRAS|PTPN11|PRKAG1|CDKN1B|ECSIT|ADCY2|GSK3B|MKNK2|TNFRSF1A|MAPK10	35	23	0.657142857142857	0.00432137378264258	Up (positive NES)
HALLMARK_PANCREAS_BETA_CELLS	0.98062015503876	0.99009900990099	0.0785029047348687	-0.167158	-0.567489	15	SRP9|VDR|DPP4|SPCS1	4	1	0.25	0.00432137378264258	Down (negative NES)

## Sheet: TableS17(Hallmark_GSEA_EPcells)
Table S17:Hallmark GSEA of Epithelial Cell in response to Exposure A (test set).
pathway	pval	padj	log2err	ES	NES	size	leadingEdge	leadingEdgeSize	overlap_exposureA_leadingEdge	overlap_frac	neglog10FDR	Direction
HALLMARK_EPITHELIAL_MESENCHYMAL_TRANSITION	6.22381797504584e-18	2.987432628022e-16	1.0959292864312	0.573128186953842	2.33475957279077	155	IL32|TIMP1|DPYSL3|FZD8|SPARC|ITGB5|TIMP3|LOX|PDLIM4|SFRP4|TGM2|POSTN|FN1|FSTL1|PMP22|COL1A1|FBLN2|IGFBP3|MGP|COL3A1|LUM|GPC1|SPP1|MMP14|PMEPA1|DST|TAGLN|BASP1|ABI3BP|ELN|FBLN1|COL6A3|VIM|PCOLCE|PFN2|IL15|CALD1|COL5A1|COL1A2|TNC|SLC6A8|COL5A2|EFEMP2|ADAM12|IGFBP2|CRLF1|GLIPR1|LOXL1|TGFBI|TGFBR3|FSTL3|FBN1|VEGFA|CAP2|CXCL6|ITGA2|SLIT3|ACTA2|COL6A2|BGN|COLGALT1|LRP1|PLOD2|ANPEP|FUCA1|CAPG|LGALS1|TPM…	80	19	0.2375	15.5247018800549	Up (positive NES)
HALLMARK_CHOLESTEROL_HOMEOSTASIS	5.61312709928593e-09	1.34715050382862e-07	0.761460801445585	-0.463432	-2.51295	68	ACAT2|EBP|TRIB3|ALDOC|CYP51A1|DHCR7|FABP5|LSS|HMGCR|ECH1|SC5D|FDPS|TMEM97|FADS2|ACSS2|IDI1|MVK|FASN|FDFT1|HSD17B7|MVD|PCYT2|PDK3|STARD4|HMGCS1|TM7SF2|GSTM2|TNFRSF12A|SCD	29	10	0.344827586206897	6.87058388213079	Down (negative NES)
HALLMARK_ESTROGEN_RESPONSE_EARLY	5.53998373306334e-06	8.86397397290135e-05	0.610526878385931	0.418748646903522	1.71010318408001	161	KRT15|FHL2|SYNGR1|TSKU|TGM2|SLC26A2|RAPGEFL1|PRSS23|SLC1A4|REEP1|AR|INHBB|XBP1|SULT2B1|THSD4|KRT19|MYB|SLC2A1|SLC1A1|FOXC1|PODXL|ABLIM1|KAZN|KLK10|WFS1|SLC39A6|CANT1|RAB31|CELSR1|SLC24A3|TFF3|SLC27A2|OVOL2|CCND1|IGFBP4|KLF4|AMFR|KRT8|GLA|CLDN7|ASB13|NBL1|ADD3|IGF1R|RHOBTB3|MSMB|SLC22A5|SCNN1A|UGCG|BAG1|CELSR2|TOB1|TFAP2C|B4GALT1|DHRS3|ALDH3B1|PDLIM3|NAV2|SH3BP5|SYBU|TMPRSS3|FCMR|BCL2|TPBG	64	16	0.25	4.05237152782344	Up (positive NES)
HALLMARK_INTERFERON_ALPHA_RESPONSE	2.41373169871524e-05	0.000231718243076663	0.575610261071129	0.465585400269679	1.80943868903997	89	EPSTI1|BST2|PARP12|IFI27|IFIH1|OAS1|LY6E|DDX60|TRIM14|RTP4|IFI44|GBP4|IL15|LAP3|IFI44L|PSME2|TAP1|STAT2|CD74|CMTR1|SLC25A28|IFI35|SAMD9|UBA7|ADAR|PSMB9|C1S|CASP1|MOV10|IFIT3|B2M|LGALS3BP|LPAR6|CNP|PROCR|PLSCR1|ISG15|IL7|PSME1|IRF9|IRF2|UBE2L6|PSMB8|NMI	44	9	0.204545454545455	3.63503977304802	Up (positive NES)
HALLMARK_UV_RESPONSE_DN	1.93608550467148e-05	0.000231718243076663	0.575610261071129	0.424524806771797	1.70311908595278	130	FHL2|PDLIM5|RND3|PMP22|COL1A1|COL3A1|LTBP1|SYNJ2|AKT3|COL1A2|KIT|COL5A2|VAV2|ERBB2|PIAS3|IGFBP5|PLCB4|MTA1|INPP4B|NRP1|PEX14|CDON|MAP1B|GCNT1|TGFBR3|CAP2|ABCC1|PRKAR2B|ID1|BMPR1A|DLG1|ACVR2A|ZMIZ1|FBLN5|SERPINE1|SMAD7|ADD3|AGGF1|IGF1R|ANXA2|WDR37|SCAF8|NFIB|PLPP3|SRI|SLC22A18|PIK3R3|CDKN1B|FYN|LPAR1|RXRA|DYRK1A|ADGRL2|PIK3CD|PTEN|PRKCE|MAGI2|APBB2|YTHDC1|SPOP|KCNMA1|PDGFRB|CDC42BPA|MGMT|ATRX|VLDL…	69	24	0.347826086956522	3.63503977304802	Up (positive NES)
HALLMARK_ANGIOGENESIS	3.80735422001522e-05	0.000304588337601218	0.557332238758646	0.622733858428417	1.9734712337743	28	SLCO2A1|TIMP1|POSTN|FSTL1|COL3A1|LUM|SPP1|APP|COL5A2|VAV2|JAG2|NRP1|VEGFA|CXCL6	14	3	0.214285714285714	3.51628672940576	Up (positive NES)
HALLMARK_INTERFERON_GAMMA_RESPONSE	5.17689944650348e-05	0.000354987390617381	0.557332238758646	0.399209005094432	1.63106581936605	166	EPSTI1|CFH|BST2|PARP12|IFI27|MX2|IFIH1|VAMP5|OAS2|LY6E|XAF1|SAMHD1|PFKP|DDX60|TRIM14|RTP4|IFI44|GBP4|IL15|LAP3|IFI44L|TNFSF10|SECTM1|PSME2|MYD88|TAP1|STAT2|CD74|CMTR1|PSMB10|SLC25A28|PTPN6|IFI35|CD69|ADAR|SSPN|NCOA3|PSMB9|C1S|CASP1|PML|OAS3|TNFAIP2|IFIT3|B2M|LGALS3BP|SERPING1|APOL6|CASP7|ST8SIA4|TOR1B|STAT1|IRF8|SRI|PLSCR1|IFNAR2|ISG15|IL7|PSME1|CCL5|LCP2|IRF9|IRF2|SOCS1|PLA2G4A|UBE2L6|TAPBP|PSMB…	86	20	0.232558139534884	3.44978707309293	Up (positive NES)
HALLMARK_COAGULATION	0.000495700849049772	0.00297420509429863	0.477270815362862	0.423037537159422	1.65137778285874	92	TIMP1|CFH|SPARC|CRIP2|TIMP3|A2M|FN1|PRSS23|CLU|CAPN5|MMP7|MMP14|S100A13|VWF|CTSK|GSN|PECAM1|CFD|FBN1|ITGA2|RGN|LRP1|CTSO|C1S|F8|CTSB|ACOX2|SERPINE1|MMP2|LAMP2|KLF7|USP11|SERPING1|WDR1|C3|GNG12|TFPI2	37	11	0.297297297297297	2.52662908683928	Up (positive NES)
HALLMARK_MYOGENESIS	0.00089818552219124	0.00479032278501994	0.477270815362862	0.398037141641367	1.58751552421617	123	SPARC|ITGB5|ITGB4|MB|BDKRB2|CLU|COL1A1|IGFBP3|COL3A1|REEP1|AEBP1|TAGLN|COL6A3|SH3BGR|IGFBP7|APP|APOD|TNNI2|ABLIM1|SLC6A8|MRAS|ADAM12|GSN|SPDEF|PDLIM7|MAPRE3|CFD|COL6A2|ATP6AP1|IGF1|SSPN|PLXNB2|SORBS3|MYH11|SPTAN1|TPM2|COL4A2|FXYD1|BAG1|GPX3|AGRN	41	4	0.0975609756097561	2.31963522165226	Up (positive NES)
HALLMARK_COMPLEMENT	0.0062592287417552	0.030044297960425	0.407017918923954	0.346508483874596	1.41016275891889	153	TIMP1|CFH|APOBEC3G|FN1|CP|CLU|MMP14|S100A13|LAP3|DOCK4|RBSN|CBLB|CTSL|CTSS|LRP1|CTSO|PRCP|GNAI2|CTSC|VCPIP1|ZEB1|PSMB9|C1S|LGALS3|CASP1|DGKH|LIPA|TIMP2|LTF|F8|CTSB|SERPINE1|LAMP2|ERAP2|COL4A2|CTSD|SERPING1|PDP1|CASP7|C3|CD55|TFPI2|DUSP5|RNF4|PLSCR1|PLAT|CPQ|CCL5|LCP2|KYNU|IRF2|CDH13|PLA2G4A|FYN|ATOX1|DYRK2|RCE1|KIF2A|GPD2|LYN|GNG2|FCER1G|CASP3|C1QA|PSEN1|PLEK|CFB|HSPA1A|IRF1|CALM1|ANG|GNAI3|CALM3	73	24	0.328767123287671	1.52223793961132	Up (positive NES)
HALLMARK_ESTROGEN_RESPONSE_LATE	0.0100190562470553	0.0437195181689687	0.380730400722792	0.348405364463915	1.41836757409865	152	MDK|KLK11|SLC26A2|RAPGEFL1|PRSS23|SLC1A4|CXCL14|XBP1|SULT2B1|PLXNB1|KRT19|CPE|MYB|AGR2|FOXC1|ST14|KLK10|FGFR3|WFS1|RAB31|HOMER2|SLC24A3|PTPN6|PRKAR2B|PDCD4|TFF3|SLC27A2|OVOL2|CCND1|DNAJC12|IGFBP4|CCNA1|KLF4|AMFR|LTF|TRIM29|ALDH3A2|ACOX2|GLA|NBL1|PERP|ADD3|SLC22A5|SCNN1A|BAG1|CELSR2|TOB1|TFAP2C|TFPI2|ALDH3B1|PDLIM3|ID2	52	12	0.230769230769231	1.35932463303778	Up (positive NES)
HALLMARK_P53_PATHWAY	0.0143448609685658	0.0573794438742631	0.380730400722792	0.336936923502679	1.38137091772775	176	STEAP3|ZMAT3|ITGB4|KRT17|PTPN14|RAD9A|CD82|PLK2|INHBB|ZBTB16|APP|PHLDA3|CDKN2A|ST14|TP53|HRAS|FDXR|ZFP36L1|JAG2|DDB2|SERPINB5|TP63|DDIT4|PIDD1|CLCA2|TAP1|NDRG1|STOM|CTSF|AEN|FUCA1|KLF4|SDC1|CASP1|PLXNB2|TM7SF3|CSRNP2|HEXIM1|CCP110|PERP|CTSD|TOB1|RAD51C|MXD4|PDGFA|RAP2B|BAIAP2|DEF6|EPHX1|ANKRA2|ABCC5|ATF3|WWP1|PROCR|CD81|TGFB1|NOL8|BTG2|TGFA|TRIAP1|TPRKB|SOCS1|CDH13|SESN1|FOS|RXRA|SP1|VAMP8|DGKA|M…	73	18	0.246575342465753	1.24124366528328	Up (positive NES)
HALLMARK_KRAS_SIGNALING_UP	0.0174293542501277	0.0643545387697024	0.352487857583619	0.33825992682823	1.37465025935087	150	IL33|CFH|KCNN4|ST6GAL1|IGFBP3|SPP1|SPARCL1|TSPAN1|PCSK1N|ADGRL4|AKAP12|TMEM176B|TMEM176A|CXCR4|APOD|CPE|CAB39L|ACE|EREG|ITGB2|ERO1A|MTMR10|SOX9|NRP1|PECAM1|ITGA2|LY96|ALDH1A3|CTSS|ITGBL1|PRDM1|EMP1|FUCA1|TSPAN7|KLF4|LAPTM5|PIGR|GNG11|SLPI|MAFB|CD37|DNMBP|IRF8|ID2|LAT2|BTC|PLAT|AVL9|F2RL1|ABCB1|TRIB2|AKT2|SATB1|GYPC|PSMB8|LCP1	56	20	0.357142857142857	1.19142081794182	Up (positive NES)
HALLMARK_HYPOXIA	0.0261569416498994	0.0896809427996551	0.282013350011725	0.323580274161996	1.31979085441673	157	LOX|TGM2|TMEM45A|CHST3|CP|HS3ST1|IGFBP3|PFKP|PLAC8|GPC1|SULT2B1|LXN|AKAP12|CXCR4|COL5A1|SLC2A1|ACKR3|ERO1A|TGFB3|PAM|DDIT4|ZNF292|TGFBI|ADM|NDRG1|VEGFA|BGN|CASP6|DCN|SDC3|SAP30|IRS2|SERPINE1|KLF7|ANXA2|ANKZF1|CDKN1C|KDELR3|KDM3A|FOSL2|IDS|RBPJ|PKP1|ATF3|HEXA|BCL2|TPBG|UGP2	48	17	0.354166666666667	1.04729983472915	Up (positive NES)
HALLMARK_APOPTOSIS	0.0380385871838255	0.121723478988242	0.321775918075361	0.332610736732808	1.34835879445941	141	TIMP1|TIMP3|CLU|IGFBP6|LUM|APP|EREG|BID|TNFSF10|WEE1|ERBB2|GSN|FDXR|TGFBR3|TAP1|BGN|PAK1|PDCD4|GSR|CD69|CASP6|EMP1|DCN|CCND1|CCNA1|TGFB2|LGALS3|CASP1|TIMP2|CASP2|BCAP31|MMP2|SMAD7|SPTAN1|DNM1L|GPX3|XIAP|RHOB|CASP7|GNA15|SOD1|ERBB3|LEF1|ATF3|ANXA1|BCL2L1|CD14|PLAT|BTG2|CDKN1B|SATB1|PPT1|GCH1|PTK2|CREBBP|FEZ1|CTNNB1|CASP3|PSEN1|SLC20A1|BAX|DNAJA1|IRF1|PDGFRB|CD38|MGMT|IFNGR1|CASP8|GADD45A	69	31	0.449275362318841	0.914625643532043	Up (positive NES)
HALLMARK_WNT_BETA_CATENIN_SIGNALING	0.047244094488189	0.141732283464567	0.219250346703755	0.430159645530963	1.43135135114926	36	FZD8|HEY1|TP53|JAG2|WNT5B|NCSTN|HEY2|PTCH1|RBPJ|LEF1|GNAI1|HDAC2|JAG1|CTNNB1|AXIN2|NCOR2|CSNK1E|ADAM17|DLL1|PSEN2	20	9	0.45	0.848531215852651	Up (positive NES)
HALLMARK_ANDROGEN_RESPONSE	0.0588235294117647	0.166089965397924	0.186432558434075	0.334507257755177	1.3040500805453	93	SLC26A2|PDLIM5|BMPR1B|CDC14B|PMEPA1|AKAP12|SRF|KRT19|PLPP1|SPDEF|ACTN1|INPP4B|NDRG1|HOMER2|ALDH1A3|MAF|PIAS1|GSR|CCND1|ZMIZ1|KRT8|APPBP2|AKT1|B2M|IQGAP2|ELK4|SLC38A2|HERC3|B4GALT1|ZBTB10|ITGAV|LIFR|STK39	33	6	0.181818181818182	0.779656605380961	Up (positive NES)
HALLMARK_HEDGEHOG_SIGNALING	0.0658198614318707	0.170897832817337	0.186432558434075	0.450104010361631	1.38985364790972	25	ADGRG1|HEY1|NRP1|CELSR1|VEGFA|HEY2|PML|TLE3|PTCH1|NRP2|NF1|AMOT|VLDLR|RASA1|TLE1|OPHN1	16	3	0.1875	0.767263444601904	Up (positive NES)
HALLMARK_PROTEIN_SECRETION	0.0712074303405573	0.170897832817337	0.16823816568964	0.333148508385021	1.29738477369532	90	TSPAN8|DST|ABCA1|ZW10|PAM|TMED10|SCRN1|MON2|CTSC|SSPN|STX16|OCRL|GLA|LAMP2|DNM1L|ADAM10|SOD1|SEC31A|VPS45|CD63|SCAMP1|CAV2|STX7|ARFGEF1|CLTC|GALC|NAPG|PPT1|ERGIC3|CLCN3|RER1|COPB1|AP2B1|AP1G1|CLTA|ARCN1|CLN5|SEC24D|KRT18|ATP7A|BET1|VPS4B|COPB2|YKT6|AP3B1|TSG101|ARFGAP3|RAB2A|RAB9A|ARFIP1|SEC22B|ARFGEF2|RAB22A|AP2S1	54	12	0.222222222222222	0.767263444601904	Up (positive NES)
HALLMARK_GLYCOLYSIS	0.0704225352112676	0.170897832817337	0.166933848713193	0.302685487206931	1.23662240513899	163	B3GNT3|GPR87|IL13RA1|IGFBP3|CAPN5|PFKP|GPC1|GCLC|GNE|CHST6|CXCR4|COL5A1|SLC16A3|B4GALT4|ERO1A|PAM|SOX9|PKM|EGLN3|DDIT4|ZNF292|TGFBI|VEGFA|PKP2|TFF3|PLOD2|CASP6|SLC35A3|DCN|HOMER1|SDC3|HS6ST2|SDC1|SAP30|BPNT1|ALG1|IRS2|NT5E|ANKZF1|AGRN|ME2|KDELR3|B4GALT1|SOD1|ALDH7A1|PHKA2|PRPS1|TPBG|UGP2|TGFA|FUT8|KIF2A|AGL|GMPPA|GALK2|MXI1|GOT1|CLDN3|P4HA2|POLR3K|PYGL|AK3|GUSB|PAXIP1|ANG|VLDLR|NASP|MDH1|PGM2|NDU…	82	23	0.280487804878049	0.767263444601904	Up (positive NES)
HALLMARK_APICAL_JUNCTION	0.110998990918264	0.253711979241747	0.130105630751129	0.297832873409823	1.21012987737957	148	MDK|ITGB4|LAYN|MYH10|ARHGEF6|CD99|VWF|CLDN8|AKT3|CX3CL1|DSC3|VAV2|HRAS|THBS3|CLDN5|ACTN1|PARVA|TGFBI|COL17A1|PECAM1|EPB41L2|RAC2|FBN1|ITGA2|GNAI2|SDC3|DLG1|VCL|SORBS3|ACTG1|CDH3|PARD6G|MMP2|PKD1|CLDN7|ADAM15|GAMT|MAP4K2|B4GALT1|BAIAP2|TIAL1|SHROOM2|MYL9|JAM3|GNAI1|INPPL1|ACTB|AKT2|PIK3R3|LDLRAP1|PTK2|SYK|SHC1|CTNND1|PTEN|CDH11|CDK8|LIMA1|MYL12B|RSU1|NFASC|NF1|NEGR1|PBX2|PIK3CB|RASA1|CAP1|VASP|MPZ…	74	19	0.256756756756757	0.595659026685382	Up (positive NES)
HALLMARK_KRAS_SIGNALING_DN	0.121369294605809	0.264805733685402	0.12563992130984	0.325793461860491	1.25176279124451	83	CAMK1D|KRT15|SYNPO|KRT5|SLC5A5|BMPR1B|MFSD6|ZBTB16|HSD11B2|CLDN8|SCGB1A1|IFI44L|KRT4|EFHD1|IGFBP2|FGFR3|NR4A2|CCNA1|TGFB2|CELSR2|GAMT|PKP1|BARD1|ZC2HC1C|STAG3|BTG2|SPTBN2	27	5	0.185185185185185	0.577072615603288	Up (positive NES)
HALLMARK_NOTCH_SIGNALING	0.144632768361582	0.301842299189388	0.119348440591015	0.396721723867853	1.27091322850098	29	NOTCH3|DTX4|MAML2|PSENEN|CCND1|SAP30|DTX2|RBX1|HES1|TCF7L2|JAG1|ST3GAL6|SKP1|NOTCH2|DLL1|PSEN2	16	6	0.375	0.520219899691963	Up (positive NES)
HALLMARK_ALLOGRAFT_REJECTION	0.211934156378601	0.423868312757202	0.0897104652742981	0.296514486252524	1.16474888532706	104	TIMP1|LY75|INHBB|IL15|CDKN2A|LY86|EREG|ITGB2|GCNT1|TAP1|CD74|PSMB10|PTPN6|CD4|CTSS|SRGN|CSK|CAPG|TGFB2|ACVR2A|TAP2|AKT1|B2M|IKBKB|ST8SIA4|STAT1|IRF8|TGFB1|IFNAR2|IL7|CCL5|GALNT1|LCP2|SOCS1|TAPBP|EIF4G3	36	14	0.388888888888889	0.37276904889314	Up (positive NES)
HALLMARK_TGF_BETA_SIGNALING	0.25	0.444444444444444	0.083129129135339	0.320371326845221	1.14858650786521	52	PMEPA1|HIPK2|RAB31|ID1|BMPR1A|SERPINE1|SMAD7|TRIM33|XIAP|CDKN1C|APC|ID2|TGFB1|FNTA|BMPR2|ACVR1|CTNNB1|FKBP1A|SLC20A1|ARID4B|ENG|NCOR2|WWTR1|PPM1A|CDK9|MAP3K7|LTBP2	27	15	0.555555555555556	0.352182518111363	Up (positive NES)
HALLMARK_PI3K_AKT_MTOR_SIGNALING	0.232198142414861	0.444444444444444	0.0847985102819124	0.293162392501912	1.14252214855146	91	PRKAA2|GNA14|VAV3|CXCR4|SLC2A1|CAB39L|HRAS|MYD88|STAT2|SMAD2|MAP2K6|AKT1|PRKAR2A|CAB39|ACTR2|DAPP1|TBK1|CSNK2B|RPTOR|CLTC|PIK3R3|CDKN1B|ARPC3|SLA|HSP90B1|PDK1|GSK3B|PTEN|PIKFYVE|PLCB1|PPP2R1B|CALR|PFN1|MKNK2|NCK1|CFL1|TIAM1|YWHAB|RIPK1|MAP3K7|ACTR3|RAC1|PIN1	43	26	0.604651162790698	0.352182518111363	Up (positive NES)
HALLMARK_IL2_STAT5_SIGNALING	0.245472837022133	0.444444444444444	0.080419996876154	0.273463035620113	1.1153770555611	157	TGM2|WLS|ITIH5|SPP1|XBP1|IKZF2|SNX9|GBP4|CTSZ|TWSG1|GLIPR2|PLPP1|TNFSF10|LRRC8C|MAP6|NRP1|ST3GAL4|HIPK2|NDRG1|COL6A1|IL3RA|EMP1|CAPG|SNX14|NCOA3|CDCP1|PLEC|AHNAK|NT5E|DRC1|IGF1R|PTCH1|CDKN1C|RHOB|CDC42SE2|IRF8|DHRS3|CD48|RHOH|PLSCR1|BCL2L1|CD81|ITGAV|ALCAM|BMPR2|BCL2|PHLDA1|ABCB1|PTGER2|SOCS1|NCS1|IL18R1|IRF6|BATF|SMPDL3A|FGL2|AMACR|UCK2	58	16	0.275862068965517	0.352182518111363	Up (positive NES)
HALLMARK_SPERMATOGENESIS	0.268292682926829	0.45993031358885	0.0785029047348687	0.309436226444996	1.14597494386956	63	GSTM3|PCSK1N|ACE|PACRG|ALOX15|SIRT1|RAD17|CCNA1|CRISP2|TEKT2|IDE|PRKAR2A|NPHP1|IFT88|ZC2HC1C|RFC4|STAM2|JAM3|TLE4|VDAC3|COIL|HSPA2|SLC12A2|TNNI3|HSPA4L|MLF1|TSN|ARL4A|PHKG2	29	7	0.241379310344828	0.337307965528142	Up (positive NES)
HALLMARK_INFLAMMATORY_RESPONSE	0.318181818181818	0.526645768025078	0.0673623868166279	0.267866097823009	1.08654955490971	144	TIMP1|BST2|RGS1|LY6E|CD82|CALCRL|SLC4A4|RTP4|MMP14|CYBB|IL15|ABCA1|TACR1|CX3CL1|PCDH7|PTAFR|PTGER4|EREG|TNFSF10|ITGB8|ADM|CXCL6|CD69|KCNJ2|ACVR2A|HRH1|SERPINE1|GNA15|CD55|SLC31A1|ATP2A2|CD48|SRI|PDPN|CD14|TPBG|BTG2|PTGER2|CCL5|LCP2|TAPBP|MARCO|IL18R1|GCH1|NMI|LPAR1	46	14	0.304347826086957	0.278481401331318	Up (positive NES)
HALLMARK_APICAL_SURFACE	0.430022573363431	0.68803611738149	0.0582216241124161	0.323774105231503	1.04096471703229	30	GSTM3|APP|CX3CL1|RTN4RL1|ADAM10|SULF2|B4GALT1|EFNA5|CROCC|ATP6V0A4|SHROOM2|ATP8B1|LYN	13	4	0.307692307692308	0.162388763555507	Up (positive NES)
HALLMARK_MITOTIC_SPINDLE	0.446231155778895	0.690938563786675	0.0511147954416412	0.249371243205263	1.02417888155224	181	SYNPO|PDLIM5|PALLD|MYH10|CEP131|DST|DOCK4|MARCKS|TUBGCP2|ARAP3|GSN|STK38L|SORBS2|MID1|EPB41L2|NCK2|KIF3B|DLG1|VCL|MARK4|SPTAN1|PXN|GEMIN4|LATS1|APC|EZR|TLK1|CCDC88A|ALMS1|PKD2|SHROOM2|ARFGEF1|PCGF5|CKAP5|ARHGEF7|RANBP9|MYO9B|KIF3C|NET1|CNTRL|KIFAP3|BCR|CDC27|CLASP1|ARHGEF3|RAPGEF6|MAP3K11|FARP1|CAPZB|PPP4R2|ALS2|HDAC6|FLNB|ABR|RICTOR|NF1|PLEKHG2|CDC42BPA|ARL8A|MYO1E|CEP250|RASA1|ARFIP2|RASAL2|NUM…	82	9	0.109756097560976	0.160560567089791	Up (positive NES)
HALLMARK_XENOBIOTIC_METABOLISM	0.463782696177062	0.695674044265594	0.0493910105981501	0.250122060287476	1.02034657866417	158	SLC46A3|PDLIM5|ABCC3|PTGDS|NDRG2|GCLC|FBLN1|AKR1C3|TMEM176B|APOE|ALDH3A1|ADH1C|ACSM1|SMOX|CYP2J2|GSS|GSTA3|ATOH8|XDH|PSMB10|DHRS1|GSR|CASP6|HES6|IGF1|ACOX3|IGFBP4|NMT1|TGFB2|CES1|ABHD6|ACOX2|SERPINE1|FMO3|ITIH4|GSTM4|IRF8|LEAP2|ATP2A2|EPHX1|ID2	41	17	0.414634146341463	0.157594199951984	Up (positive NES)
HALLMARK_FATTY_ACID_METABOLISM	0.603776779505345	0.85617617379949	0.143902565267782	-0.159016	-0.977291	131	ACAT2|ACOT2|CA2|ACADL|G0S2|ACSM3|ECH1|IDI1|ENO3|ACAA2|FASN|AADAT|HSD17B7|MIF|CD36	15	5	0.333333333333333	0.0674368621492037	Down (negative NES)
HALLMARK_DNA_REPAIR	0.606458123107972	0.85617617379949	0.0372254009247509	0.23610543668903	0.953688073114462	138	TK2|CCNO|TP53|ERCC3|DDB2|SUPT5H|POLR2A|RPA3|CANT1|MPC2|ERCC4|DAD1|TAF10|CETN2|BCAP31|NELFE|USP11|POLR2I|GTF2H5|GTF2B|RRM2B|SUPT4H1|NT5C3A|TAF1C|RBX1|RFC4|DDB1|RPA2|GTF2H3|POLR2K|SRSF6|SF3A3|REV3L|DGCR8|NME1|HCLS1|BCAM|UMPS|AK3|AAAS|ARL6IP1|SMAD5|RNMT|ERCC1|NFX1|ADCY6|NUDT21|GUK1|SNAPC5|TAF13|ERCC5|SURF1|NME4|XPC|EDF1|GTF3C5|POLR2F|CSTF3|SDCBP|PCNA|GTF2A2|VPS28|DUT|TSG101|POLD3	65	11	0.169230769230769	0.0674368621492037	Up (positive NES)
HALLMARK_PANCREAS_BETA_CELLS	0.663030303030303	0.909298701298701	0.0415717899246479	0.315816365373121	0.872653735506109	15	AKT3|LMO2|FOXO1|MAFB	4	2	0.5	0.0412934291911827	Up (positive NES)
HALLMARK_REACTIVE_OXYGEN_SPECIES_PATHWAY	0.701312910284464	0.935083880379285	0.0341946045318573	0.248240074919848	0.859156278409971	43	FES|PFKP|GCLC|IPCEF1|ABCC1|GSR|SBNO2|GPX3|SOD1|GCLM|ATOX1|PRDX1|PDLIM1|NDUFB4|SCAF4	15	5	0.333333333333333	0.0291494296067141	Up (positive NES)
HALLMARK_BILE_ACID_METABOLISM	0.738366080661841	0.941484145145472	0.0289274314524646	0.222537124406256	0.861497581804736	86	RBP1|OPTN|AR|SULT2B1|ABCA1|BBOX1|ALDH1A1|EFHC1|FDXR|LIPE|SLC27A2|GSTK1|EPHX2|SOD1|GCLM|SLC22A18|ABCA5|ABCA2|RXRA|AMACR|CROT|PEX1|AQP9|PEX26|NUDT12|TFCP2L1|PRDX5|ABCD3|ALDH9A1|HSD17B11|ABCA8|CYP39A1	32	11	0.34375	0.0261869892254479	Up (positive NES)
HALLMARK_PEROXISOME	0.745341614906832	0.941484145145472	0.0285038599247822	0.221940783049061	0.86039166553033	88	SULT2B1|HSD11B2|CRABP2|SCGB1A1|ALDH1A1|ECI2|HRAS|PEX11B|ERCC3|PEX14|SMARCC1|SLC27A2|GSTK1|EPHX2|IDE|DHRS3|SOD1|FABP6|SEMA3C|ABCC5	20	8	0.4	0.0261869892254479	Up (positive NES)
HALLMARK_IL6_JAK_STAT3_SIGNALING	0.803837953091685	0.989339019189766	0.0261139619405561	0.217862570208244	0.803071855551797	62	A2M|IL13RA1|PDGFC|MYD88|LEPR|STAT2|IL3RA|STAT1|TGFB1|CD14|STAM2|IL7|IRF9|SOCS1|IL18R1|CD9|IL15RA|IL10RB|IRF1|IL4R|CD38|IFNAR1|IFNGR1	23	7	0.304347826086957	0.00465486216020237	Up (positive NES)
HALLMARK_UV_RESPONSE_UP	0.90761421319797	1	0.0157837626630889	0.191479086675671	0.763687583040289	123	MMP14|FOSB|PRKACA|SLC6A8|NAT1|BID|IGFBP2|POLG2|TAP1|HYAL2|RXRB|CDC34|GPX3|CDKN1C|RHOB|CNP|PDLIM3|EPHX1|ATF3|RFC4|UROD|BTG2|ABCB1|GGH|HSPA2|FOS|DGAT1|PPT1|GCH1|CYB5R1|NR4A1|LYN|DNAJB1|CASP3|STARD3|DNAJA1|PRPF3|TMBIM6|POLE3|GRINA|IRF1|ARRB2|CDKN2B|CLTB|MARK2|IL6ST|ATP6V1F|RASGRP1|CDC5L|IL6|NXF1|PPIF|YKT6	53	17	0.320754716981132	0	Up (positive NES)
HALLMARK_TNFA_SIGNALING_VIA_NFKB	0.927492447129909	1	0.0134461833974729	0.185951967438967	0.761526833649841	174	IFIH1|DUSP4|PDLIM5|PLK2|PMEPA1|ABCA1|FOSB|MARCKS|ACKR3|TNC|PTGER4|TAP1|VEGFA|CXCL6|CD69|DNAJB4|NR4A2|CCND1|KLF4|TNFAIP2|IRS2|LITAF|SERPINE1|RHOB|B4GALT1|FOSL2|ZBTB10|ID2|DUSP5|PLPP3|ATF3|BCL2A1|F2RL1|PHLDA1|BTG2|HES1|CCL5|KYNU|FOS|B4GALT5|GCH1|JAG1|NR4A1	43	18	0.418604651162791	0	Up (positive NES)
HALLMARK_HEME_METABOLISM	0.925478348439074	1	0.013628036219219	0.184892764631076	0.753610217944271	156	UCP2|OPTN|SNCA|SEC14L1|GCLC|SLC22A4|ALDH1L1|DMTN|SLC2A1|SLC6A8|LMO2|XPO7|SMOX|BTRC|TSPAN5|RBM38|HTATIP2|TNRC6B|CIR1|MBOAT2|KDM7A|CTSB|LAMP2|RBM5|NFE2L1|C3|UBAC1|NARF|BMP2K|TNS1|CDR2|SYNJ1|GCLM|UROD|BTG2|PPOX	36	7	0.194444444444444	0	Up (positive NES)
HALLMARK_UNFOLDED_PROTEIN_RESPONSE	0.94575230296827	1	0.0131702144400005	0.175932476777549	0.691568654098262	102	SLC1A4|WIPI1|DNAJA4|XBP1|ERO1A|DDIT4|WFS1|VEGFA|CNOT6|ALDH18A1|GEMIN4|KDELR3|POP4|SEC31A|NOP56|ATF3|YWHAZ|BANF1|DCTN1|ARFGAP1|DDX10|FUS|SHC1|SPCS1|HSP90B1|CNOT2	26	9	0.346153846153846	0	Up (positive NES)
HALLMARK_MYC_TARGETS_V1	0.977844914400806	1	0.00801915843678622	0.160221324488826	0.654318525425551	161	CSTF2|RUVBL2|NDUFAB1|SMARCC1|PRPS2|PSMD1|RRM1|NOP56|LSM2|PSMD7|PSMB3|RFC4|ERH|VDAC3|SF3A1|HDAC2|PSMC6|NCBP1|NME1|FAM120A|HSPE1|SSBP1|SNRPB2|TRA2B|PSMD14|EXOSC7|UBA2|POLE3|SYNCRIP|PTGES3|PSMA7|PRDX4|TXNL4A|TARDBP|SET|CCT5|PCNA|SRSF7|DUT|XPO1|HNRNPD|PCBP1|PSMC4|IFRD1|BUB3|PA2G4|HPRT1|ORC2|TCP1|EIF3J|EIF4G2|UBE2L3|KPNB1|DHX15|YWHAE|KPNA2|CANX|DEK|VDAC1|CCT4|NOP16|HNRNPA3|CLNS1A|TRIM28|EIF1AX|PPIA|US…	88	32	0.363636363636364	0	Up (positive NES)
HALLMARK_ADIPOGENESIS	0.997991967871486	1	0.00382852089890286	0.138000594599646	0.565773575740421	176	UCP2|ITIH5|SPARCL1|FZD4|ABCA1|LTC4S|APOE|LIPE|PEX14|VEGFB|NDUFAB1|CHCHD10|STOM|PDCD4|CHUK|SSPN|NMT1|ENPP2|EPHX2|COL4A1|ANGPT1|NDUFS3|GPX3|TOB1|SLC27A1|C3|SOD1|ELMOD3|LAMA4|RTN3|LIFR|CD151|SAMM50|GPAT4|DNAJC15|DGAT1|REEP5|GPD2|HIBCH|CDKN2C|BCL6|NDUFB7|ACOX1|COX7B|MTCH2|UBC|RIOK3|IDH3A|ARL4A|COQ9|IFNGR1|ADCY6|GADD45A|COQ3	54	18	0.333333333333333	0	Up (positive NES)
HALLMARK_G2M_CHECKPOINT	1	1	0.00409492237559551	0.113065756178558	0.459593495567886	149	HMGB3|CASP8AP2|MARCKS|SMARCC1|FOXN3|MNAT1|CCND1|PML|PURA|SAP30|TLE3|UPF1|MEIS2|SS18|ODF2|ORC5|EFNA5|BARD1|TGFB1|RPA2|CDKN1B|CTCF|HIRA|CDC27|UCK2|CDKN2C|YTHDC1|SLC12A2|KMT5A|TRA2B|SYNCRIP|E2F3|ATRX|RASAL2|NASP|NUMA1|SRSF10|MAPK14|NOTCH2|CHMP1A|MEIS1|RBL1|UBE2S|KATNA1	44	7	0.159090909090909	0	Up (positive NES)
HALLMARK_MYC_TARGETS_V2	1	1	0.0121212734616549	0.121772305481289	0.438939725578816	54	IPO4|TCOF1|NOC4L|TBRG4|NOP56|TFB2M|HSPE1|PRMT3|MPHOSPH10|RABEPK|FARSA|WDR74|NIP7|SUPV3L1|UNG|PA2G4|LAS1L|IMP4|MAP3K6|NOP16|NDUFAF4|UTP20|GNL3|DCTPP1	24	4	0.166666666666667	0	Up (positive NES)
HALLMARK_OXIDATIVE_PHOSPHORYLATION	1	1	0.00434551079568136	0.103167201604874	0.421960691267333	172	SLC25A12|MAOB|NDUFAB1|ECI1|TIMM9|ATP6AP1|MFN2|OAT|NDUFS3|ATP1B1|GLUD1|PDP1|CASP7|NDUFS6|TCIRG1|SUCLA2|VDAC3|NDUFA3|NDUFS1|NDUFA1|COX15|PDK4|OGDH|TIMM17A|NDUFB3|NDUFB2|TIMM8B|NDUFB7|NDUFB4|BAX|COX7B|NDUFA2|IDH3A|NDUFC1|TIMM50|NDUFB1|COX6B1|NDUFA8|MDH1|GPI|CPT1A|LRPPRC|SURF1|CS|UQCRB|NQO2|POLR2F|ATP6V1F|ETFB|BDH2|SUPV3L1|NDUFA5|HCCS|ISCA1|NDUFS8|COX8A|NDUFB5|NDUFA4|ISCU|NDUFA9|ETFDH|SLC25A20|ATP6V1…	104	20	0.192307692307692	0	Up (positive NES)
HALLMARK_E2F_TARGETS				-0.133598		155	PTTG1|CTPS1|DIAPH3|LBR|SHMT1|CDK4|MELK|RFC3|TK1|TIPIN|RACGAP1|DONSON|POLA2|BRCA2|MKI67|TIMELESS|MMS22L|DNMT1|CDC25B|BRCA1|HMGA1|SPAG5|EXOSC8|BRMS1L|CHEK1|POLD1|CKS2|SMC4|POLE|RFC2|HELLS|TCF19|E2F8|MCM3|PMS2	35	7	0.2
HALLMARK_MTORC1_SIGNALING				-0.232929		179	EBP|FADS1|PHGDH|SHMT2|TRIB3|CYP51A1|SLC7A11|DHCR7|HMGCR|ELOVL6|SC5D|LTA4H|ENO1|MAP2K3|TMEM97|FADS2|GLRX|IDI1|CTH|PSAT1|INSIG1|SLC1A5	22	10	0.454545454545455

## Sheet: TableS17(Hallmark_GSEA_DC)
Table S17:Hallmark GSEA of DC in response to Exposure A (test set).
pathway	pval	padj	log2err	ES	NES	size	leadingEdge	leadingEdgeSize	overlap_exposureA_leadingEdge	overlap_frac	neglog10FDR	Direction
HALLMARK_TNFA_SIGNALING_VIA_NFKB	0.386363636363636	0.386363636363636	0.0817515582532145	0.437971628137152	1.06031157450576	11	FOS|IER2|CEBPD|PPP1R15A|HBEGF	5	2	0.4	0.413003755107914	Up (positive NES)

## Sheet: TableS17(Hallmark_GSEA_Bcell)
Table S17:Hallmark GSEA of B Cell in response to Exposure A (test set).
pathway	pval	padj	log2err	ES	NES	size	leadingEdge	leadingEdgeSize	overlap_exposureA_leadingEdge	overlap_frac	neglog10FDR	Direction
HALLMARK_COMPLEMENT	0.0331365755873156	0.434338747099768	0.321775918075361	0.46848708375332	1.69697727350913	10	HSPA5|CTSH	2	1	0.5	0.362171425758645	Up (positive NES)
HALLMARK_IL2_STAT5_SIGNALING	0.0587424054182695	0.434338747099768	0.321775918075361	0.358475152457791	1.63096273097313	18	RHOH|ADAM19|AHNAK|ALCAM|BCL2|CCND3|CD44|CDC42SE2|HIPK2|HUWE1|IRF4|IRF8|ITGA6|KLF6|MAPKAPK2|NCOA3	16	6	0.375	0.362171425758645	Up (positive NES)
HALLMARK_APOPTOSIS	0.0482758620689655	0.434338747099768	0.271288554688953	0.333003195179617	1.57533536441412	20	BIRC3|ADD1|BCL2L11|BTG2|CD38|CD44|CFLAR|CREBBP|CYLD|DAP|DNAJC3	11	6	0.545454545454545	0.362171425758645	Up (positive NES)
HALLMARK_UV_RESPONSE_UP	0.0874316939890711	0.434338747099768	0.204294756516886	0.417879161528977	1.51366273432015	10	BCL2L11|BTG1|BTG2|CCND3|EIF5|FOS|GLS|HNRNPU|LYN	9	5	0.555555555555556	0.362171425758645	Up (positive NES)
HALLMARK_G2M_CHECKPOINT	0.0904872389791183	0.434338747099768	0.227987202850442	-0.289968	-1.43382	18	HSPA8|YTHDC1|TRA2B|TOP1|STAG1|SRSF2|SMARCC1|SLC7A5|SLC38A1|SFPQ	10	4	0.4	0.362171425758645	Down (negative NES)
HALLMARK_HYPOXIA	0.196308724832215	0.557618213660245	0.12563992130984	0.23528500045749	1.23804049351564	25	HSPA5|MYH9|ANXA2|BCL2|BTG1|CXCR4|DDIT4|DUSP1|ETS1|EXT1|FOS|FOXO3|HDLBP|ISG20|JUN|KLF6	16	8	0.5	0.253663049180217	Up (positive NES)
HALLMARK_ESTROGEN_RESPONSE_EARLY	0.253968253968254	0.557618213660245	0.11146266692298	0.311672278338945	1.1897979436662	11	AFF1|BCL2|CD44|ELF1|ELOVL5|FKBP5|FOS	7	4	0.571428571428571	0.253663049180217	Up (positive NES)
HALLMARK_HEME_METABOLISM	0.265625	0.557618213660245	0.107554375265169	0.263359402285678	1.17701108875801	17	MARK3|ADD1|BACH1|BTG2|CAST|CCND3	6	3	0.5	0.253663049180217	Up (positive NES)
HALLMARK_MTORC1_SIGNALING	0.292469352014011	0.557618213660245	0.102080107662747	0.25284199999793	1.15036112264403	18	HSPA5|ACTR3|BTG2|CXCR4|DAPP1|DDIT4|EDEM1|ELOVL5	8	3	0.375	0.253663049180217	Up (positive NES)
HALLMARK_MYC_TARGETS_V1	0.286975717439294	0.557618213660245	0.118287526124085	-0.307028	-1.13994	10	HNRNPA2B1|TRA2B|SRSF2|SMARCC1|HNRNPU|HNRNPD|HNRNPC|HNRNPA3|GNL3|FAM120A	10	2	0.2	0.253663049180217	Down (negative NES)
HALLMARK_UNFOLDED_PROTEIN_RESPONSE	0.297391304347826	0.557618213660245	0.100633389423036	0.24521611302057	1.13756341882284	19	HSPA5|ATF6|CNOT4|DDIT4|DNAJC3|EDEM1|EIF2AK3|ERN1|FUS|HERPUD1|HSP90B1	11	4	0.363636363636364	0.253663049180217	Up (positive NES)
HALLMARK_INTERFERON_GAMMA_RESPONSE	0.288834951456311	0.557618213660245	0.124434168630393	-0.189731	-1.1372	28	B2M|ZBP1|TXNIP|TAPBP|STAT3|STAT2|ST8SIA4|SP110|SLAMF7|RNF213|PTPN2|PTPN1|PELI1|PDE4B|PARP14|NLRC5|NCOA3	17	5	0.294117647058824	0.253663049180217	Down (negative NES)
HALLMARK_MITOTIC_SPINDLE	0.345058626465662	0.557618213660245	0.0897104652742981	0.191688336735441	1.09234658906335	30	MYH9|ABI1|AKAP13|ARFGEF1|BCL2L11|CAPZB|CCDC88A|CLASP1|CLIP1|CNTRL|DLG1|DOCK2|EPB41|EZR	14	1	0.0714285714285714	0.253663049180217	Up (positive NES)
HALLMARK_KRAS_SIGNALING_UP	0.348511383537653	0.557618213660245	0.0916795246008379	0.238901746935917	1.08693682936012	18	BIRC3|CD37|CTSS|CXCR4|DOCK2|ETS1|HDAC9|IKZF1|IRF8|LAPTM5|LCP1|MAP3K1|NIN|PECAM1|PRDM1|RABGAP1L	16	7	0.4375	0.253663049180217	Up (positive NES)
HALLMARK_ANDROGEN_RESPONSE	0.327146171693736	0.557618213660245	0.112843355675562	-0.219764	-1.08668	18	B2M|UBE2J1|TPD52|TNFAIP8|SPCS3|SLC38A2|SEC24D|SAT1|PTK2B|PIAS1	10	1	0.1	0.253663049180217	Down (negative NES)
HALLMARK_APICAL_JUNCTION	0.39344262295082	0.558620689655172	0.0870515867946735	0.287994408078078	1.0431877043243	10	MYH9|ACTB|ARPC2	3	2	0.666666666666667	0.252882983356325	Up (positive NES)
HALLMARK_TNFA_SIGNALING_VIA_NFKB	0.418965517241379	0.558620689655172	0.0806388495950661	0.216474167208399	1.02407248945929	20	BIRC3|ATP2B1|BTG1|BTG2|CCNL1|CD44|CFLAR	7	3	0.428571428571429	0.252882983356325	Up (positive NES)
HALLMARK_INTERFERON_ALPHA_RESPONSE	0.403973509933775	0.558620689655172	0.0965629554309422	-0.275172	-1.02166	10	B2M|TXNIP|STAT2|SP110	4	0	0	0.252882983356325	Down (negative NES)
HALLMARK_UV_RESPONSE_DN	0.460869565217391	0.582151029748284	0.0760837160951725	0.215579472371702	1.00007833334592	19	ANXA2|ATP2B1|ATRX|ATXN1|CDK13|CELF2|DLG1|DUSP1|DYRK1A	9	3	0.333333333333333	0.234964329994046	Up (positive NES)
HALLMARK_ESTROGEN_RESPONSE_LATE	0.597122302158273	0.716546762589928	0.0647943366000727	0.211630377057886	0.875661261860198	14	AFF1|BCL2|CD44|DNAJC1|ELOVL5|FKBP5|FOS|ISG20|JAK1	9	6	0.666666666666667	0.144755461830396	Up (positive NES)
HALLMARK_PROTEIN_SECRETION	0.642361111111111	0.734126984126984	0.0596037042575973	0.185955129373317	0.831074369793732	17	ADAM10|AP3B1|ARFGEF1|ARFGEF2	4	0	0	0.13422881237853	Up (positive NES)
HALLMARK_P53_PATHWAY	0.830935251798561	0.887410207939509	0.0492917662312669	0.170384138785626	0.704997042693802	14	BTG1|BTG2|CCND3|DDIT4|FBXW7|FOS|FOXO3	7	3	0.428571428571429	0.0518755798719971	Up (positive NES)
HALLMARK_ALLOGRAFT_REJECTION	0.850434782608696	0.887410207939509	0.0466948041282054	0.140842762165164	0.673127	21	ABI1|CCND3|CD47|CD74|CTSS|EIF3A|EIF4G3|ETS1|HCLS1|HDAC9|IFNAR2|IRF4|IRF8	13	3	0.230769230769231	0.0518755798719971	Up (positive NES)
HALLMARK_PI3K_AKT_MTOR_SIGNALING	0.996330275229358	0.996330275229358	0.0419081748591401	0.110608097063664	0.467201735873077	15	ACTR3|CAB39|CXCR4|DAPP1|GRB2|HSP90B1|ITPR2|MAPK8|PDK1|PRKCB|RPTOR|SQSTM1|STAT2	13	7	0.538461538461538	0.00159667268779549	Up (positive NES)
