# Supplementary material
Source: Research Square preprint supplement (doi:10.21203/rs.3.rs-9392286/v1)
Supplement: Supplementary file 5 [file 40333a74de48ebac61852502.xlsx]

## Sheet: Table S9(trainmodel.riskMatrix）
Table S9: Risk Matrix of Model(Training set)
id	SVM	glmBoost+SVM	Ridge	Lasso+SVM	glmBoost+Ridge	Enet[alpha=0.1]	glmBoost+Enet[alpha=0.1]	Enet[alpha=0.2]	Enet[alpha=0.3]	glmBoost+Enet[alpha=0.3]	glmBoost+Enet[alpha=0.2]	Enet[alpha=0.4]	glmBoost+Enet[alpha=0.4]	Lasso+glmBoost	Enet[alpha=0.5]	glmBoost	glmBoost+Enet[alpha=0.5]	Enet[alpha=0.6]	glmBoost+Enet[alpha=0.6]	glmBoost+Enet[alpha=0.7]	glmBoost+Enet[alpha=0.8]	Enet[alpha=0.8]	Enet[alpha=0.9]	Lasso	Enet[alpha=0.7]	glmBoost+Enet[alpha=0.9]	glmBoost+Lasso
GSM3660641	0.0575413727423281	0.0669187446795791	0.0262486662079284	0.0635245136866361	0.0458956609172266	0.000496726232233418	0.00106169748885083	0.000262871779280365	0.000200903778249447	0.000111150753983374	0.000183280249731771	0.000236296569262484	7.65675352699827e-05	0.105942241783465	0.000273558407951369	0.0993262543847606	8.0437831940009e-05	0.000302462480634152	9.17006500293184e-05	0.000120405269277892	0.000157942473937478	0.000413048482831503	0.262276564013363	0.185146288929777	0.000375530496226301	0.0319444204921753	0.0727393299248047
GSM3660642	0.0576021295598166	0.0669451900555235	0.070094604602442	0.0635148982816975	0.0910692704985308	0.00238399432062605	0.00838481111574069	0.0013001223966544	0.000965163981295674	0.00156142098954751	0.00236243582031184	0.00100779631177915	0.001117851179057	0.121216595280408	0.00102315054488414	0.092177357854337	0.00104742989005319	0.00098864451317144	0.000989827015359883	0.00100994491421719	0.000934877367719596	0.00106151620072737	0.175889577572279	0.122568818421883	0.00106350401445101	0.0495032231134614	0.0774541760248113
GSM3660643	0.0575761768908944	0.0669152017123389	0.0165728309019824	0.0635793607653037	0.0100781363620145	4.02198617139273e-05	5.10308235686959e-06	1.25088606727398e-05	6.46999863208203e-06	3.74973107998197e-08	1.20315076204832e-07	5.65444791710188e-06	1.45993042847637e-08	0.02356011223541	4.40309096252212e-06	0.0156734309411218	1.30898627148458e-08	2.74183859954168e-06	1.29035251592599e-08	1.53905035036336e-08	1.54192021315366e-08	8.06036335974888e-07	0.172426063768204	0.0574999679511747	1.66145836958986e-06	0.00172994638270732	0.00780911222126287
GSM3660644	0.057585010510132	0.0669187433363622	0.0694104966448525	0.063514889045562	0.0522149867571594	0.00212504769151135	0.00183401384107018	0.00111185054792868	0.000798417455378643	0.000240365211171577	0.000369357610721871	0.000783696480261058	0.000174087892294613	0.120475244667006	0.000739419449759015	0.11197741471137	0.000187634955029889	0.000652061177020482	0.00022061786435378	0.000284872137079712	0.000334754223824231	0.00056921157998079	0.251467004760212	0.157832625952945	0.000630507513026221	0.0423243986168438	0.0818343514045282
GSM3660645	0.0576364232258094	0.0669719379936973	0.0668666097860371	0.063474452270126	0.104300638719238	0.00148303482553933	0.00699812058426051	0.000769922053848734	0.000556816490281415	0.00121908201530608	0.00183018894738394	0.000610798195341685	0.000893568635643644	0.189464470430711	0.000657477830331759	0.167642303114925	0.000884068369754134	0.000676687835797662	0.000899016421814716	0.00102440001462745	0.00107780169620474	0.000823876293957149	0.385068958054064	0.331274502780852	0.000780037394209523	0.0865916970033464	0.166374722464173
GSM3660646	0.0575952546878525	0.0669007205022951	0.0138208345568927	0.0636056425191324	0.0139664602777234	2.29560706853152e-05	0.000250311672718904	6.67968440544763e-06	3.30953307655938e-06	2.83611376518492e-05	4.26619859482064e-05	3.58096206588828e-06	2.1814398256919e-05	0.0355537003761187	3.86446398819691e-06	0.0397753751983517	2.69993671578983e-05	4.03863407306145e-06	3.83733875172403e-05	6.3630439677642e-05	9.61614141181274e-05	7.89804248040726e-06	0.137502530552955	0.069148448653638	5.72426804823042e-06	0.0153970804231559	0.0328581821109042
GSM3660647	0.0575427945768014	0.0668837658167893	0.0889404636835292	0.0635773384309161	0.0940580893061761	0.00210911373171915	0.00512890511042597	0.000995507347387892	0.000637136108296079	0.000671490795967856	0.00112871671711491	0.000595357997481268	0.000439679920761745	0.0126895568844465	0.000530572057443216	0.0196386642729037	0.000388906526789789	0.000432477468006186	0.000338762242210316	0.000323062407442776	0.000255671181831138	0.000319344861764286	0.107593243723773	0.0388593686972062	0.00037849130963975	0.016334423566516	0.0147124553447581
GSM3660648	0.0576390454369894	0.0757895684865253	0.0657381790503896	0.0634720178317354	0.126750495020834	0.00241145284173446	0.0116795672145943	0.00135243889641013	0.00102742335775331	0.00225105498019348	0.0033778213869873	0.00103574418452974	0.00161954975922201	0.0446361727348801	0.00100436503706677	0.0594385184568401	0.00151704678103596	0.000920464146250668	0.00143634565966216	0.00145415682784898	0.00131346478182489	0.00081986100800662	0.172481173012258	0.0852923999632236	0.000918525074822815	0.0400807260195623	0.0412175091009739
GSM3660652	0.898150384277703	0.953838367364827	0.891181050143033	0.987022205952153	0.945300681445808	0.996926955609685	0.999076370549014	0.998364613665539	0.998805625678691	0.99990983392404	0.999852851599956	0.998801953619575	0.999935775393525	0.937003635318467	0.998838802359177	0.936713717214607	0.999928742556509	0.998933945913746	0.999914209344256	0.99987655309122	0.999845045277482	0.998979114931929	0.602009864488353	0.745739697500393	0.998917233200561	0.957959622485848	0.900977874148911
GSM3660653	0.938586881316134	0.915630466016166	0.928509232580203	0.943906194507465	0.859618735498594	0.99835114009105	0.991893303062756	0.999166253758339	0.999418875049901	0.998694121293927	0.997999467452224	0.999409075679719	0.999053922481011	0.876115384990564	0.999417128588364	0.895006598691902	0.999066313703047	0.99945702622499	0.999052654688986	0.998917396873095	0.998879703324615	0.99944029688101	0.627884317007485	0.735399036616927	0.99943853787655	0.919578807019295	0.85819137373354
GSM3660654	0.976621129033382	0.961201288666113	0.969462842400309	0.990538923690351	0.968325905030411	0.999575554514138	0.999850216079386	0.999796050906574	0.999859842625149	0.999994478393882	0.999988124300322	0.999862803142802	0.999996908642475	0.991248822695007	0.999872002634852	0.989920821618781	0.99999697986916	0.999889840741295	0.999996916047504	0.999996143026705	0.999996285010001	0.999929836547451	0.794071384547589	0.930429379362596	0.999898679685742	0.992680377701598	0.984485442978779
GSM3660655	0.741571151121907	0.799319928587238	0.810901786535735	0.86527010466583	0.71191478124097	0.994144597301775	0.973898375296267	0.996890717730059	0.99774026011557	0.995320048805401	0.99286838213669	0.997668586292136	0.996670937185337	0.777241337395394	0.997656590759884	0.794628984713085	0.996876037950502	0.9977593842145	0.997022398710475	0.996930163585194	0.997108848465878	0.997649470532896	0.468126991721849	0.587524023063974	0.997612330546857	0.849450801439439	0.769870404726688
GSM3660656	0.976615718022345	0.953834347413432	0.982252403737297	0.987031432676657	0.9765062740032	0.999929251448785	0.999939207760309	0.999970466528107	0.99997979129602	0.999998640945354	0.999996605269854	0.999978667136759	0.99999933209761	0.994793585614548	0.999978671691022	0.994898786567748	0.999999397581067	0.999980224102473	0.999999447666064	0.999999365744915	0.999999463049271	0.999985716005984	0.843202521003276	0.953285443280264	0.999979243432185	0.99642455406373	0.991475089098117

## Sheet: TableS9(trainmodel.classMatrix)
Table S9: Class Matrix of Model(Training set)
id	SVM	glmBoost+SVM	Ridge	Lasso+SVM	glmBoost+Ridge	Enet[alpha=0.1]	glmBoost+Enet[alpha=0.1]	Enet[alpha=0.2]	Enet[alpha=0.3]	glmBoost+Enet[alpha=0.3]	glmBoost+Enet[alpha=0.2]	Enet[alpha=0.4]	glmBoost+Enet[alpha=0.4]	Lasso+glmBoost	Enet[alpha=0.5]	glmBoost	glmBoost+Enet[alpha=0.5]	Enet[alpha=0.6]	glmBoost+Enet[alpha=0.6]	glmBoost+Enet[alpha=0.7]	glmBoost+Enet[alpha=0.8]	Enet[alpha=0.8]	Enet[alpha=0.9]	Lasso	Enet[alpha=0.7]	glmBoost+Enet[alpha=0.9]	glmBoost+Lasso
GSM3660641	0	0	0	0	0	0	0	0	0	0	0	0	0	0	0	0	0	0	0	0	0	0	0	0	0	0	0
GSM3660642	0	0	0	0	0	0	0	0	0	0	0	0	0	0	0	0	0	0	0	0	0	0	0	0	0	0	0
GSM3660643	0	0	0	0	0	0	0	0	0	0	0	0	0	0	0	0	0	0	0	0	0	0	0	0	0	0	0
GSM3660644	0	0	0	0	0	0	0	0	0	0	0	0	0	0	0	0	0	0	0	0	0	0	0	0	0	0	0
GSM3660645	0	0	0	0	0	0	0	0	0	0	0	0	0	0	0	0	0	0	0	0	0	0	0	0	0	0	0
GSM3660646	0	0	0	0	0	0	0	0	0	0	0	0	0	0	0	0	0	0	0	0	0	0	0	0	0	0	0
GSM3660647	0	0	0	0	0	0	0	0	0	0	0	0	0	0	0	0	0	0	0	0	0	0	0	0	0	0	0
GSM3660648	0	0	0	0	0	0	0	0	0	0	0	0	0	0	0	0	0	0	0	0	0	0	0	0	0	0	0
GSM3660652	1	1	1	1	1	1	1	1	1	1	1	1	1	1	1	1	1	1	1	1	1	1	1	1	1	1	1
GSM3660653	1	1	1	1	1	1	1	1	1	1	1	1	1	1	1	1	1	1	1	1	1	1	1	1	1	1	1
GSM3660654	1	1	1	1	1	1	1	1	1	1	1	1	1	1	1	1	1	1	1	1	1	1	1	1	1	1	1
GSM3660655	1	1	1	1	1	1	1	1	1	1	1	1	1	1	1	1	1	1	1	1	1	1	0	1	1	1	1
GSM3660656	1	1	1	1	1	1	1	1	1	1	1	1	1	1	1	1	1	1	1	1	1	1	1	1	1	1	1

## Sheet: Table S9(trainmodel.celltype)
Table S9: Model and Celltype(Training set)
features	algorithm
B_cell	SVM
DC	SVM
Endothelial_cells	SVM
Epithelial_cells	SVM
Fibroblasts	SVM
Macrophage	SVM
Monocyte	SVM
Neutrophils	SVM
NK_cell	SVM
Smooth_muscle_cells	SVM
T_cells	SVM
Tissue_stem_cells	SVM
Fibroblasts	glmBoost+SVM
Macrophage	glmBoost+SVM
Monocyte	glmBoost+SVM
Neutrophils	glmBoost+SVM
Smooth_muscle_cells	glmBoost+SVM
T_cells	glmBoost+SVM
B_cell	Ridge
DC	Ridge
Endothelial_cells	Ridge
Epithelial_cells	Ridge
Fibroblasts	Ridge
Macrophage	Ridge
Monocyte	Ridge
Neutrophils	Ridge
NK_cell	Ridge
Smooth_muscle_cells	Ridge
T_cells	Ridge
Tissue_stem_cells	Ridge
Fibroblasts	Lasso+SVM
Macrophage	Lasso+SVM
Monocyte	Lasso+SVM
Neutrophils	Lasso+SVM
Smooth_muscle_cells	Lasso+SVM
Fibroblasts	glmBoost+Ridge
Macrophage	glmBoost+Ridge
Monocyte	glmBoost+Ridge
Neutrophils	glmBoost+Ridge
Smooth_muscle_cells	glmBoost+Ridge
T_cells	glmBoost+Ridge
B_cell	Enet[alpha=0.1]
DC	Enet[alpha=0.1]
Endothelial_cells	Enet[alpha=0.1]
Epithelial_cells	Enet[alpha=0.1]
Fibroblasts	Enet[alpha=0.1]
Macrophage	Enet[alpha=0.1]
Monocyte	Enet[alpha=0.1]
Neutrophils	Enet[alpha=0.1]
NK_cell	Enet[alpha=0.1]
Smooth_muscle_cells	Enet[alpha=0.1]
T_cells	Enet[alpha=0.1]
Tissue_stem_cells	Enet[alpha=0.1]
Fibroblasts	glmBoost+Enet[alpha=0.1]
Macrophage	glmBoost+Enet[alpha=0.1]
Monocyte	glmBoost+Enet[alpha=0.1]
Neutrophils	glmBoost+Enet[alpha=0.1]
Smooth_muscle_cells	glmBoost+Enet[alpha=0.1]
T_cells	glmBoost+Enet[alpha=0.1]
B_cell	Enet[alpha=0.2]
DC	Enet[alpha=0.2]
Endothelial_cells	Enet[alpha=0.2]
Epithelial_cells	Enet[alpha=0.2]
Fibroblasts	Enet[alpha=0.2]
Macrophage	Enet[alpha=0.2]
Monocyte	Enet[alpha=0.2]
Neutrophils	Enet[alpha=0.2]
NK_cell	Enet[alpha=0.2]
Smooth_muscle_cells	Enet[alpha=0.2]
T_cells	Enet[alpha=0.2]
Tissue_stem_cells	Enet[alpha=0.2]
B_cell	Enet[alpha=0.3]
DC	Enet[alpha=0.3]
Endothelial_cells	Enet[alpha=0.3]
Epithelial_cells	Enet[alpha=0.3]
Fibroblasts	Enet[alpha=0.3]
Macrophage	Enet[alpha=0.3]
Monocyte	Enet[alpha=0.3]
Neutrophils	Enet[alpha=0.3]
NK_cell	Enet[alpha=0.3]
Smooth_muscle_cells	Enet[alpha=0.3]
T_cells	Enet[alpha=0.3]
Tissue_stem_cells	Enet[alpha=0.3]
Fibroblasts	glmBoost+Enet[alpha=0.3]
Macrophage	glmBoost+Enet[alpha=0.3]
Monocyte	glmBoost+Enet[alpha=0.3]
Neutrophils	glmBoost+Enet[alpha=0.3]
Smooth_muscle_cells	glmBoost+Enet[alpha=0.3]
T_cells	glmBoost+Enet[alpha=0.3]
Fibroblasts	glmBoost+Enet[alpha=0.2]
Macrophage	glmBoost+Enet[alpha=0.2]
Monocyte	glmBoost+Enet[alpha=0.2]
Neutrophils	glmBoost+Enet[alpha=0.2]
Smooth_muscle_cells	glmBoost+Enet[alpha=0.2]
T_cells	glmBoost+Enet[alpha=0.2]
DC	Enet[alpha=0.4]
Endothelial_cells	Enet[alpha=0.4]
Epithelial_cells	Enet[alpha=0.4]
Fibroblasts	Enet[alpha=0.4]
Macrophage	Enet[alpha=0.4]
Monocyte	Enet[alpha=0.4]
Neutrophils	Enet[alpha=0.4]
NK_cell	Enet[alpha=0.4]
Smooth_muscle_cells	Enet[alpha=0.4]
T_cells	Enet[alpha=0.4]
Tissue_stem_cells	Enet[alpha=0.4]
Fibroblasts	glmBoost+Enet[alpha=0.4]
Macrophage	glmBoost+Enet[alpha=0.4]
Monocyte	glmBoost+Enet[alpha=0.4]
Neutrophils	glmBoost+Enet[alpha=0.4]
Smooth_muscle_cells	glmBoost+Enet[alpha=0.4]
T_cells	glmBoost+Enet[alpha=0.4]
Fibroblasts	Lasso+glmBoost
Macrophage	Lasso+glmBoost
Monocyte	Lasso+glmBoost
Neutrophils	Lasso+glmBoost
Smooth_muscle_cells	Lasso+glmBoost
DC	Enet[alpha=0.5]
Endothelial_cells	Enet[alpha=0.5]
Epithelial_cells	Enet[alpha=0.5]
Fibroblasts	Enet[alpha=0.5]
Macrophage	Enet[alpha=0.5]
Monocyte	Enet[alpha=0.5]
Neutrophils	Enet[alpha=0.5]
NK_cell	Enet[alpha=0.5]
Smooth_muscle_cells	Enet[alpha=0.5]
T_cells	Enet[alpha=0.5]
Tissue_stem_cells	Enet[alpha=0.5]
Fibroblasts	glmBoost
Macrophage	glmBoost
Monocyte	glmBoost
Neutrophils	glmBoost
Smooth_muscle_cells	glmBoost
T_cells	glmBoost
Fibroblasts	glmBoost+Enet[alpha=0.5]
Macrophage	glmBoost+Enet[alpha=0.5]
Monocyte	glmBoost+Enet[alpha=0.5]
Neutrophils	glmBoost+Enet[alpha=0.5]
Smooth_muscle_cells	glmBoost+Enet[alpha=0.5]
T_cells	glmBoost+Enet[alpha=0.5]
DC	Enet[alpha=0.6]
Endothelial_cells	Enet[alpha=0.6]
Epithelial_cells	Enet[alpha=0.6]
Fibroblasts	Enet[alpha=0.6]
Macrophage	Enet[alpha=0.6]
Monocyte	Enet[alpha=0.6]
Neutrophils	Enet[alpha=0.6]
NK_cell	Enet[alpha=0.6]
Smooth_muscle_cells	Enet[alpha=0.6]
T_cells	Enet[alpha=0.6]
Tissue_stem_cells	Enet[alpha=0.6]
Fibroblasts	glmBoost+Enet[alpha=0.6]
Macrophage	glmBoost+Enet[alpha=0.6]
Monocyte	glmBoost+Enet[alpha=0.6]
Neutrophils	glmBoost+Enet[alpha=0.6]
Smooth_muscle_cells	glmBoost+Enet[alpha=0.6]
T_cells	glmBoost+Enet[alpha=0.6]
Fibroblasts	glmBoost+Enet[alpha=0.7]
Macrophage	glmBoost+Enet[alpha=0.7]
Monocyte	glmBoost+Enet[alpha=0.7]
Neutrophils	glmBoost+Enet[alpha=0.7]
Smooth_muscle_cells	glmBoost+Enet[alpha=0.7]
T_cells	glmBoost+Enet[alpha=0.7]
Fibroblasts	glmBoost+Enet[alpha=0.8]
Macrophage	glmBoost+Enet[alpha=0.8]
Neutrophils	glmBoost+Enet[alpha=0.8]
Smooth_muscle_cells	glmBoost+Enet[alpha=0.8]
T_cells	glmBoost+Enet[alpha=0.8]
DC	Enet[alpha=0.8]
Endothelial_cells	Enet[alpha=0.8]
Fibroblasts	Enet[alpha=0.8]
Macrophage	Enet[alpha=0.8]
Monocyte	Enet[alpha=0.8]
Neutrophils	Enet[alpha=0.8]
NK_cell	Enet[alpha=0.8]
Smooth_muscle_cells	Enet[alpha=0.8]
T_cells	Enet[alpha=0.8]
Fibroblasts	Enet[alpha=0.9]
Monocyte	Enet[alpha=0.9]
Neutrophils	Enet[alpha=0.9]
Fibroblasts	Lasso
Macrophage	Lasso
Monocyte	Lasso
Neutrophils	Lasso
Smooth_muscle_cells	Lasso
DC	Enet[alpha=0.7]
Endothelial_cells	Enet[alpha=0.7]
Epithelial_cells	Enet[alpha=0.7]
Fibroblasts	Enet[alpha=0.7]
Macrophage	Enet[alpha=0.7]
Monocyte	Enet[alpha=0.7]
Neutrophils	Enet[alpha=0.7]
NK_cell	Enet[alpha=0.7]
Smooth_muscle_cells	Enet[alpha=0.7]
T_cells	Enet[alpha=0.7]
Fibroblasts	glmBoost+Enet[alpha=0.9]
Macrophage	glmBoost+Enet[alpha=0.9]
Monocyte	glmBoost+Enet[alpha=0.9]
Neutrophils	glmBoost+Enet[alpha=0.9]
Smooth_muscle_cells	glmBoost+Enet[alpha=0.9]
T_cells	glmBoost+Enet[alpha=0.9]
Fibroblasts	glmBoost+Lasso
Macrophage	glmBoost+Lasso
Monocyte	glmBoost+Lasso
Neutrophils	glmBoost+Lasso
Smooth_muscle_cells	glmBoost+Lasso
T_cells	glmBoost+Lasso
