# Supplementary material
Source: Research Square preprint supplement (doi:10.21203/rs.3.rs-9392286/v1)
Supplement: Supplementary file 6 [file 46bec3d179b68eec1aa969df.xlsx]

## Sheet: Table S14(Model Threshold Sens 
Table S14: Model Threshold Sensitivity
Model	Threshold	Sens	Spec	Youden	Flipped	UsedMidpoint
OOF_Lasso+glmBoost	0.499179486474853	1	1	1	FALSE	TRUE

## Sheet: Table S14(Train_vs_Test)
Table S14: The Final Generalization Ability Assessment of the Training Set and the Test Set
	TP	FP	TN	FN	Accuracy	Precision	Recall	F1	Specificity	BalancedAcc
Train_OOF	5	0	8	0	1	1	1	1	1	1
Test_n5	2	0	2	1	0.8	1	0.667	0.8	1	0.833
