# Supplementary material
Source: Research Square preprint supplement (doi:10.21203/rs.3.rs-9392286/v1)
Supplement: Supplementary file 7 [file 4808842ccb80f483376e3964.xlsx]

## Sheet: Table S16(EN_DEG)
Table S16: The Differential Genes of Endothelial Cells in the Testing Set
logFC	AveExpr	t	P.Value	adj.P.Val	B	feature	gene	cell_type
3.72148008959606	0.905604714848964	11.1776160064935	1.20565037173984e-05	0.0568058579297685	3.56678358276083	Endothelial_cells__NRGN	NRGN	Endothelial_cells
4.60524825003925	-4.88895	10.2808608425444	2.07685170265584e-05	0.0568058579297685	3.16299026825816	Endothelial_cells__LDHB	LDHB	Endothelial_cells
-3.79697	-0.219967	-9.22545	4.16987877250348e-05	0.0568058579297685	2.6148213583746	Endothelial_cells__CYP3A5	CYP3A5	Endothelial_cells
3.50070354969831	-3.64021	9.11051039883513	4.51751295596049e-05	0.0568058579297685	2.54976380467514	Endothelial_cells__C4ORF48	C4ORF48	Endothelial_cells
-2.91312	-2.11969	-8.91728	5.17877449756065e-05	0.0568058579297685	2.43782686558861	Endothelial_cells__WIPI1	WIPI1	Endothelial_cells
-3.53392	1.57858148839457	-8.86661	5.36993420609202e-05	0.0568058579297685	2.40792722882066	Endothelial_cells__B3GALNT1	B3GALNT1	Endothelial_cells
4.00680748319099	-0.557477	8.74476588533798	5.86324594025267e-05	0.0568058579297685	2.33508968311901	Endothelial_cells__DUSP14	DUSP14	Endothelial_cells
5.86604696915398	-0.49924	8.61417568436117	6.44993825013633e-05	0.0568058579297685	2.25551420705171	Endothelial_cells__IGHG3	IGHG3	Endothelial_cells
3.67624463143325	-1.05091	8.35232086236713	7.83858706474925e-05	0.0568058579297685	2.09110330852345	Endothelial_cells__CCND2	CCND2	Endothelial_cells
2.78653266434879	1.99203876230889	8.22634705150389	8.62537369219039e-05	0.0568058579297685	2.00963145190666	Endothelial_cells__SPRY1	SPRY1	Endothelial_cells
-3.59595	2.4610212631053	-7.71588	0.000128745193211985	0.0568058579297685	1.66282829574142	Endothelial_cells__IFNGR1	IFNGR1	Endothelial_cells
2.56782819314994	0.996610441231002	7.57778843950339	0.000144016691819291	0.0568058579297685	1.56420730102601	Endothelial_cells__IPO11	IPO11	Endothelial_cells
-3.04077	0.916238582714403	-7.4901	0.00015477560215477	0.0568058579297685	1.5004722497454	Endothelial_cells__GLO1	GLO1	Endothelial_cells
2.59155227454768	1.73544753923976	7.44455514037689	0.000160720497746239	0.0568058579297685	1.46702345090007	Endothelial_cells__ANKRD28	ANKRD28	Endothelial_cells
3.4647313163293	-2.54854	7.44039764639779	0.000161275906929164	0.0568058579297685	1.4639582700247	Endothelial_cells__SLC43A3	SLC43A3	Endothelial_cells
-2.89409	0.546082116334085	-7.42211	0.000163745009522315	0.0568058579297685	1.4504511750152	Endothelial_cells__TSPAN15	TSPAN15	Endothelial_cells
3.92611514839923	-3.78194	7.40427299154166	0.000166194295301631	0.0568058579297685	1.43724089460224	Endothelial_cells__MFSD10	MFSD10	Endothelial_cells
2.84513821968813	0.984658815335941	7.3959847192865	0.000167346523453346	0.0568058579297685	1.43108970666536	Endothelial_cells__ZC3H15	ZC3H15	Endothelial_cells
-6.5595	-3.54515	-7.36459	0.00017179331110154	0.0568058579297685	1.40771918634691	Endothelial_cells__CLEC4E	CLEC4E	Endothelial_cells
2.39205795786859	-0.138981	7.32148338823028	0.000178118983691688	0.0568058579297685	1.37543913400559	Endothelial_cells__ABLIM2	ABLIM2	Endothelial_cells
2.93592718857483	1.54852758012018	7.1952318722627	0.000198212606482686	0.0568058579297685	1.27963942930146	Endothelial_cells__CPNE5	CPNE5	Endothelial_cells
5.23188660601302	26.2873097673914	7.14516302015482	0.000206881001430064	0.0568058579297685	1.24111955285499	Endothelial_cells__CTSB	CTSB	Endothelial_cells
-3.64704	0.740955890135379	-7.05988	0.000222649284395894	0.0568058579297685	1.17481106847729	Endothelial_cells__SULT1A2	SULT1A2	Endothelial_cells
2.52615540925012	0.577537221430851	7.01427515135508	0.000231636708795177	0.0568058579297685	1.13898190631446	Endothelial_cells__MYL6B	MYL6B	Endothelial_cells
2.68979507274121	-2.27053	7.00308683957141	0.000233903489254766	0.0568058579297685	1.13015341849571	Endothelial_cells__EFCAB2	EFCAB2	Endothelial_cells
-3.05517	-0.0865043	-6.96374	0.000242076972560733	0.0568058579297685	1.09897995715599	Endothelial_cells__TMOD1	TMOD1	Endothelial_cells
2.85832782673946	0.0178376354593748	6.95134193446997	0.000244718094897401	0.0568058579297685	1.08912001846908	Endothelial_cells__SLC29A1	SLC29A1	Endothelial_cells
4.70058373549373	0.14045934849054	6.94201376010266	0.000246727113058744	0.0568058579297685	1.08168726747365	Endothelial_cells__HSPB1	HSPB1	Endothelial_cells
3.29112251382998	0.536135137957361	6.94054908126828	0.000247044249782415	0.0568058579297685	1.08051921136084	Endothelial_cells__TESC	TESC	Endothelial_cells
-2.42771	-0.534301	-6.91268	0.000253167271649741	0.0568058579297685	1.05824200023458	Endothelial_cells__HIPK2	HIPK2	Endothelial_cells
2.23052676824847	-0.63844	6.88298481397368	0.000259880187036541	0.0568058579297685	1.03439900491757	Endothelial_cells__JAK3	JAK3	Endothelial_cells
-2.82296	-3.22005	-6.87876	0.000260851255936511	0.0568058579297685	1.03099848600524	Endothelial_cells__CDCA7L	CDCA7L	Endothelial_cells
-2.97778	0.602517203767957	-6.87768	0.000261101042527439	0.0568058579297685	1.03012572015574	Endothelial_cells__PCTP	PCTP	Endothelial_cells
-3.30993	1.79293130718724	-6.86803	0.000263337571154489	0.0568058579297685	1.02234634260898	Endothelial_cells__PLLP	PLLP	Endothelial_cells
2.93607314169952	-1.12935	6.83678028961982	0.000270728683135396	0.0568058579297685	0.997076848024782	Endothelial_cells__PAFAH1B3	PAFAH1B3	Endothelial_cells
2.45538754086088	0.048282772452272	6.81562233479575	0.00027586622872048	0.0568058579297685	0.97989550316346	Endothelial_cells__ARID5B	ARID5B	Endothelial_cells
-2.8742	2.44205698249095	-6.80917	0.000277454233920147	0.0568058579297685	0.974646301166579	Endothelial_cells__PON2	PON2	Endothelial_cells
-3.32962	1.10119425280557	-6.78898	0.000282493167118952	0.0568058579297685	0.958177081661381	Endothelial_cells__RALA	RALA	Endothelial_cells
4.83778806140257	1.74255898486746	6.72697062361478	0.000298621689484065	0.0568058579297685	0.90728014952951	Endothelial_cells__PLEKHO1	PLEKHO1	Endothelial_cells
-2.43459	-2.32145	-6.71535	0.00030175793951802	0.0568058579297685	0.897687740449036	Endothelial_cells__CHPT1	CHPT1	Endothelial_cells
2.35547999693791	0.419208875247308	6.70458532823811	0.000304697320509367	0.0568058579297685	0.888783249716764	Endothelial_cells__OAF	OAF	Endothelial_cells
-2.94619	11.6779085604357	-6.70411	0.00030482919392671	0.0568058579297685	0.888385675352503	Endothelial_cells__RNF13	RNF13	Endothelial_cells
2.32510826176953	-0.747617	6.67607922643921	0.000312636883188779	0.0568058579297685	0.865134098031564	Endothelial_cells__PRKAG2	PRKAG2	Endothelial_cells
3.24664514875457	-1.17113	6.64754207461733	0.000320819406774707	0.0568058579297685	0.841352514351024	Endothelial_cells__HNRNPC	HNRNPC	Endothelial_cells
-3.67631	1.79299150579811	-6.63703	0.000323893647831084	0.0568058579297685	0.832566690536505	Endothelial_cells__VIPR1	VIPR1	Endothelial_cells
3.32104117070243	2.66686909355309	6.60342375643244	0.000333948903298709	0.0568058579297685	0.804375060752085	Endothelial_cells__SERBP1	SERBP1	Endothelial_cells
3.74113465835973	-3.58549	6.5957062425967	0.000336307280436664	0.0568058579297685	0.797880203972579	Endothelial_cells__OSBP2	OSBP2	Endothelial_cells
-3.63208	0.62947834911937	-6.5924	0.000337323586755377	0.0568058579297685	0.795094727174884	Endothelial_cells__INPP5K	INPP5K	Endothelial_cells
2.89939205154519	1.4835520682183	6.58546757889402	0.000339465101441512	0.0568058579297685	0.789251404058869	Endothelial_cells__OLFM1	OLFM1	Endothelial_cells
3.56030762841648	-1.8445	6.57970107992647	0.000341258307880383	0.0568058579297685	0.784385456145538	Endothelial_cells__ST13	ST13	Endothelial_cells
-2.07489	0.249309965181706	-6.45837	0.000381577553769674	0.0608697678428502	0.680969058601645	Endothelial_cells__MARVELD2	MARVELD2	Endothelial_cells
3.01813289786313	-4.94554	6.44630276727256	0.000385872446864837	0.0608697678428502	0.670575297281164	Endothelial_cells__DNPH1	DNPH1	Endothelial_cells
-2.30286	-2.15721	-6.44146	0.000387612362810412	0.0608697678428502	0.666396085037285	Endothelial_cells__ABR	ABR	Endothelial_cells
-2.66065	-0.535753	-6.37789	0.000411275972978656	0.0624202942172303	0.611271023509564	Endothelial_cells__RNF144B	RNF144B	Endothelial_cells
2.939	-1.42618	6.37475096643474	0.000412485423759181	0.0624202942172303	0.608535725686714	Endothelial_cells__SPATA6L	SPATA6L	Endothelial_cells
2.47452516694381	1.06433280217825	6.30870514726764	0.000438895370346676	0.0639866454343547	0.550644918026898	Endothelial_cells__EBF1	EBF1	Endothelial_cells
-3.38946	0.2954233857473	-6.30004	0.000442499156050483	0.0639866454343547	0.543005324664858	Endothelial_cells__TLR3	TLR3	Endothelial_cells
3.54371298895081	-3.1972	6.2716532181487	0.000454541288340666	0.0639866454343547	0.517902720914363	Endothelial_cells__TGIF1	TGIF1	Endothelial_cells
3.03179095599206	-3.5089	6.26218924912833	0.000458637553730495	0.0639866454343547	0.509508812493769	Endothelial_cells__TTC7A	TTC7A	Endothelial_cells
2.09662054238576	0.850369971287469	6.2494460364673	0.000464218902183951	0.0639866454343547	0.498186605296856	Endothelial_cells__COPS8	COPS8	Endothelial_cells
2.51380849027997	4.14067402322237	6.23874742670015	0.000468963759641432	0.0639866454343547	0.488663402787518	Endothelial_cells__EFHD2	EFHD2	Endothelial_cells
-2.18406	-0.0604847	-6.2054	0.000484105531249774	0.0649872634934173	0.45887894296727	Endothelial_cells__SEC22C	SEC22C	Endothelial_cells
2.34375404386671	-0.188825	6.12211638626747	0.000524385292741179	0.0677644607672504	0.383796134342246	Endothelial_cells__AKAP13	AKAP13	Endothelial_cells
-2.35646	1.71679764422177	-6.10134	0.000535013739522386	0.0677644607672504	0.364907738580021	Endothelial_cells__TRIM56	TRIM56	Endothelial_cells
-2.19894	1.4281169878854	-6.1012	0.000535084152931365	0.0677644607672504	0.364783808410727	Endothelial_cells__PKN1	PKN1	Endothelial_cells
-2.08152	0.551118443994148	-6.08689	0.0005425418644496	0.0677644607672504	0.351745832658828	Endothelial_cells__PDK4	PDK4	Endothelial_cells
-3.02108	-4.91238	-6.08128	0.000545502687901692	0.0677644607672504	0.346617235301657	Endothelial_cells__FAM49A	FAM49A	Endothelial_cells
-3.11329	-2.63072	-6.06386	0.000554797769185324	0.0679056151901389	0.330688716080832	Endothelial_cells__PEX2	PEX2	Endothelial_cells
2.75033679114907	0.511636598237664	6.01281092179099	0.000583083383719086	0.0701752402072038	0.283748218199638	Endothelial_cells__PDE7B	PDE7B	Endothelial_cells
4.32618165476462	0.949327991285342	5.98158598923757	0.000601181185825829	0.0701752402072038	0.254849732522445	Endothelial_cells__HSPD1	HSPD1	Endothelial_cells
2.7168884922332	-0.713088	5.97869557552378	0.000602888093537392	0.0701752402072038	0.252167472109416	Endothelial_cells__TOP1MT	TOP1MT	Endothelial_cells
-2.74209	1.92364452319602	-5.97166	0.000607066838269695	0.0701752402072038	0.245631636197241	Endothelial_cells__PRX	PRX	Endothelial_cells
2.06414469904551	4.04268258544061	5.91029629023442	0.000644911885369366	0.072200599930455	0.188336120290128	Endothelial_cells__ATP2B1	ATP2B1	Endothelial_cells
-2.31497	0.0775853572844476	-5.90818	0.000646265352402463	0.072200599930455	0.186347519307162	Endothelial_cells__ZNF274	ZNF274	Endothelial_cells
3.70666961461852	-4.95508	5.9014049266625	0.000650612158450574	0.072200599930455	0.179987921270658	Endothelial_cells__ERP29	ERP29	Endothelial_cells
-2.15276	2.0795497186742	-5.84743	0.000686451128220047	0.0751754307917823	0.129060946994286	Endothelial_cells__ID1	ID1	Endothelial_cells
3.89743378915645	0.182243915225264	5.83055765571496	0.000698106695558051	0.0752888116462274	0.11304944156525	Endothelial_cells__IGHG1	IGHG1	Endothelial_cells
2.85049729491394	0.168638532747556	5.81990587622378	0.00070557819396921	0.0752888116462274	0.102920646639611	Endothelial_cells__ANKRD29	ANKRD29	Endothelial_cells
4.27408320628586	0.784110767574723	5.77798742679862	0.000735864357967084	0.0766059956259405	0.0628951318220015	Endothelial_cells__PNP	PNP	Endothelial_cells
2.14020463793605	-5.72352	5.76699780846753	0.00074404361360318	0.0766059956259405	0.0523580617916908	Endothelial_cells__PYGL	PYGL	Endothelial_cells
-3.87363	1.12651238748558	-5.75808	0.000750753611120357	0.0766059956259405	0.0437968940430746	Endothelial_cells__STXBP6	STXBP6	Endothelial_cells
2.60881970087558	0.954902780292068	5.74136940640109	0.000763516954863501	0.0766059956259405	0.0277142103067503	Endothelial_cells__LAPTM4B	LAPTM4B	Endothelial_cells
2.67095466829118	-3.70789	5.7271451416267	0.000774571107287676	0.0766059956259405	0.0139935128367563	Endothelial_cells__SERPINF1	SERPINF1	Endothelial_cells
3.19838585600663	-3.51767	5.72450353367736	0.000776643672181099	0.0766059956259405	0.0114420465593925	Endothelial_cells__PLIN3	PLIN3	Endothelial_cells
2.05970020887813	-1.82674	5.7075849958169	0.000790065965772252	0.0766059956259405	-0.00492429	Endothelial_cells__ASGR1	ASGR1	Endothelial_cells
2.15242995304214	0.716265385130032	5.69410176363062	0.000800949071142561	0.0766059956259405	-0.0179986	Endothelial_cells__CD79B	CD79B	Endothelial_cells
2.22468898153721	1.06727266811591	5.68450367532649	0.000808798574968964	0.0766059956259405	-0.0273225	Endothelial_cells__FAM171B	FAM171B	Endothelial_cells
-2.83624	0.742557768377943	-5.68214	0.000810745800482464	0.0766059956259405	-0.0296219	Endothelial_cells__MEIS1	MEIS1	Endothelial_cells
3.01572660543897	-0.624502	5.67198330932484	0.000819167801358729	0.0766059956259405	-0.0395062	Endothelial_cells__APEX1	APEX1	Endothelial_cells
-2.35818	0.283481658727874	-5.62821	0.000856611480214098	0.078117287900826	-0.0822952	Endothelial_cells__NCALD	NCALD	Endothelial_cells
-5.12497	-0.966853	-5.61824	0.000865397545135826	0.078117287900826	-0.0920735	Endothelial_cells__RCSD1	RCSD1	Endothelial_cells
-1.97907	0.858780967325138	-5.60656	0.000875828972098736	0.078117287900826	-0.103559	Endothelial_cells__ARL2BP	ARL2BP	Endothelial_cells
3.79400304549521	1.06913317414612	5.60606903346669	0.00087627251270724	0.078117287900826	-0.104044	Endothelial_cells__INO80B	INO80B	Endothelial_cells
2.45857346300681	1.17837180278453	5.59944111995184	0.000882257006209016	0.078117287900826	-0.110571	Endothelial_cells__CA5B	CA5B	Endothelial_cells
-4.2765	0.652601624249916	-5.55998	0.000918846499975694	0.0805006254662916	-0.149567	Endothelial_cells__DNAJC1	DNAJC1	Endothelial_cells
2.18640182519429	-0.565984	5.51246066105413	0.000965185016401602	0.0818662690813652	-0.196851	Endothelial_cells__TRAF4	TRAF4	Endothelial_cells
2.53449912257997	0.747785355415144	5.5030968817773	0.000974620792604808	0.0818662690813652	-0.206209	Endothelial_cells__UCK2	UCK2	Endothelial_cells
-2.61196	-1.94048	-5.48329	0.000994925507090962	0.0818662690813652	-0.226054	Endothelial_cells__RENBP	RENBP	Endothelial_cells
-2.0117	6.31839247442009	-5.4761	0.00100240921300236	0.0818662690813652	-0.233269	Endothelial_cells__ALDH2	ALDH2	Endothelial_cells
-4.47276	0.00186718321993091	-5.45771	0.00102184180119991	0.0818662690813652	-0.251764	Endothelial_cells__LPL	LPL	Endothelial_cells
-5.09387	-0.386922	-5.44454	0.0010360168675307	0.0818662690813652	-0.265041	Endothelial_cells__CD82	CD82	Endothelial_cells
-1.89433	-2.00969	-5.44317	0.00103751165364296	0.0818662690813652	-0.266431	Endothelial_cells__MOAP1	MOAP1	Endothelial_cells
-2.67664	-2.38418	-5.44296	0.00103774169849635	0.0818662690813652	-0.266644	Endothelial_cells__DRAM1	DRAM1	Endothelial_cells
2.70241804076412	1.17209033453445	5.43254728218258	0.00104912246407212	0.0818662690813652	-0.277161	Endothelial_cells__CLSTN3	CLSTN3	Endothelial_cells
-2.51242	0.598623970348456	-5.42666	0.00105561768278672	0.0818662690813652	-0.283113	Endothelial_cells__FAXDC2	FAXDC2	Endothelial_cells
-2.83981	0.866692276906112	-5.4219	0.00106090438054362	0.0818662690813652	-0.287932	Endothelial_cells__MYL12B	MYL12B	Endothelial_cells
2.41372863481811	-4.4995	5.41001441767072	0.00107424291770462	0.0818662690813652	-0.299987	Endothelial_cells__PPIF	PPIF	Endothelial_cells
2.06814709707209	-0.480603	5.40794000039894	0.00107658914165591	0.0818662690813652	-0.302092	Endothelial_cells__INSIG1	INSIG1	Endothelial_cells
1.90998880760391	0.908782798039263	5.40314523409225	0.00108203410373538	0.0818662690813652	-0.306961	Endothelial_cells__NREP	NREP	Endothelial_cells
-5.87199	-0.246895	-5.38513	0.00110277485287756	0.0818662690813652	-0.325293	Endothelial_cells__C2ORF88	C2ORF88	Endothelial_cells
3.30192987153959	1.69865603421231	5.37612208420262	0.00111330312877576	0.0818662690813652	-0.334471	Endothelial_cells__ABL2	ABL2	Endothelial_cells
2.33256635762962	2.60391710811247	5.37126764138832	0.00111902660529415	0.0818662690813652	-0.339425	Endothelial_cells__CD200	CD200	Endothelial_cells
-3.07942	0.288254023089386	-5.36942	0.00112121853238804	0.0818662690813652	-0.341316	Endothelial_cells__PAPSS2	PAPSS2	Endothelial_cells
1.79656153358664	1.18747968905796	5.36932940417271	0.00112132099907192	0.0818662690813652	-0.341404	Endothelial_cells__BACE2	BACE2	Endothelial_cells
-1.95526	-0.0194354	-5.35164	0.00114250317563837	0.0826874254855489	-0.359492	Endothelial_cells__INMT	INMT	Endothelial_cells
-1.8793	-0.156111	-5.32718	0.00117253347235451	0.0834372353123885	-0.384586	Endothelial_cells__PDCD1LG2	PDCD1LG2	Endothelial_cells
-1.87256	2.05635079829904	-5.32555	0.00117456630417958	0.0834372353123885	-0.386262	Endothelial_cells__TFPI	TFPI	Endothelial_cells
1.79297122439388	-0.817004	5.31566578518858	0.00118698058609982	0.0834372353123885	-0.396436	Endothelial_cells__COMMD6	COMMD6	Endothelial_cells
-1.89461	-1.83648	-5.31011	0.00119401510340086	0.0834372353123885	-0.402156	Endothelial_cells__N4BP2L1	N4BP2L1	Endothelial_cells
1.84553771752699	1.79337489848855	5.30308503712324	0.00120298789348632	0.0834372353123885	-0.409404	Endothelial_cells__C1ORF54	C1ORF54	Endothelial_cells
-1.86807	0.116150555536648	-5.28926	0.00122085110910095	0.0836550539790317	-0.423679	Endothelial_cells__PPP1R21	PPP1R21	Endothelial_cells
-2.9574	-0.28269	-5.28515	0.00122623051609298	0.0836550539790317	-0.427939	Endothelial_cells__ASF1A	ASF1A	Endothelial_cells
2.35555557763112	0.0483985395625616	5.26394943708673	0.00125434418310793	0.0848772897236366	-0.449907	Endothelial_cells__COL1A1	COL1A1	Endothelial_cells
2.45336176064443	-1.83029	5.24218866755933	0.00128395576439093	0.0854879012337752	-0.472534	Endothelial_cells__DUSP4	DUSP4	Endothelial_cells
-1.78494	-1.70342	-5.23698	0.0012911532016648	0.0854879012337752	-0.477957	Endothelial_cells__ATF7IP2	ATF7IP2	Endothelial_cells
-2.65541	-0.852783	-5.22951	0.00130156560266059	0.0854879012337752	-0.485751	Endothelial_cells__BACH2	BACH2	Endothelial_cells
-2.48447	7.16058104719114	-5.22123	0.00131321340344509	0.0854879012337752	-0.494397	Endothelial_cells__CEBPB	CEBPB	Endothelial_cells
4.28383969495345	0.35004805201795	5.21931748402706	0.00131592183862479	0.0854879012337752	-0.496397	Endothelial_cells__RSL1D1	RSL1D1	Endothelial_cells
-1.9622	-2.09885	-5.21294	0.001324995705774	0.0854879012337752	-0.503069	Endothelial_cells__QDPR	QDPR	Endothelial_cells
1.83718345763893	-4.0378	5.19570090909318	0.00134986442541179	0.0864224739438643	-0.521128	Endothelial_cells__PEBP1	PEBP1	Endothelial_cells
2.13674166851272	0.891908468642047	5.17716915251636	0.00137718317552546	0.0865171547935709	-0.540596	Endothelial_cells__RBP7	RBP7	Endothelial_cells
1.86811770517022	2.65829506133875	5.17592965755468	0.00137903226856356	0.0865171547935709	-0.541901	Endothelial_cells__CNPY3	CNPY3	Endothelial_cells
2.69646883264328	-3.27195	5.16078375993801	0.00140185211115741	0.0865171547935709	-0.557857	Endothelial_cells__SCCPDH	SCCPDH	Endothelial_cells
3.74973885307941	-1.36921	5.14152144484066	0.00143148451436465	0.0865171547935709	-0.578203	Endothelial_cells__ZNF208	ZNF208	Endothelial_cells
1.84569249208619	1.49603014467541	5.13680691487731	0.00143884309814325	0.0865171547935709	-0.583192	Endothelial_cells__TSHZ2	TSHZ2	Endothelial_cells
-2.93274	-2.61521	-5.13672	0.0014389716221352	0.0865171547935709	-0.583279	Endothelial_cells__PIK3IP1	PIK3IP1	Endothelial_cells
3.4964894936763	-0.129071	5.13078031491856	0.00144831107275328	0.0865171547935709	-0.589575	Endothelial_cells__PPP1R14B	PPP1R14B	Endothelial_cells
1.81056046925914	-0.29024	5.12450455828816	0.00145824435169566	0.0865171547935709	-0.596228	Endothelial_cells__SFMBT2	SFMBT2	Endothelial_cells
-2.28976	1.76484855918773	-5.11996	0.00146548707842006	0.0865171547935709	-0.601051	Endothelial_cells__KCNMB4	KCNMB4	Endothelial_cells
-2.9791	-5.13	-5.11165	0.00147882683419693	0.0865171547935709	-0.609874	Endothelial_cells__HOPX	HOPX	Endothelial_cells
-2.26832	0.569341395117277	-5.10719	0.00148604278244313	0.0865171547935709	-0.614615	Endothelial_cells__WNT2B	WNT2B	Endothelial_cells
3.22650590817976	0.860496479351111	5.10482587801308	0.00148988747122791	0.0865171547935709	-0.617131	Endothelial_cells__LEF1	LEF1	Endothelial_cells
1.70016928427726	0.265533867747171	5.09699051300727	0.00150269903522187	0.0865171547935709	-0.625472	Endothelial_cells__PGM2L1	PGM2L1	Endothelial_cells
-4.34671	-0.496215	-5.09418	0.00150731757372006	0.0865171547935709	-0.628462	Endothelial_cells__ARHGAP6	ARHGAP6	Endothelial_cells
1.74972517176443	-0.192023	5.09038687214993	0.00151359197651521	0.0865171547935709	-0.632509	Endothelial_cells__BMP1	BMP1	Endothelial_cells
-3.88091	2.06567726691564	-5.07481	0.00153963972991282	0.0865171547935709	-0.649139	Endothelial_cells__SLC6A4	SLC6A4	Endothelial_cells
-2.31353	-2.08728	-5.06955	0.00154854029481417	0.0865171547935709	-0.654758	Endothelial_cells__TBXAS1	TBXAS1	Endothelial_cells
1.65271	0.365477501998076	5.06832545586852	0.00155062590940147	0.0865171547935709	-0.656071	Endothelial_cells__FBXO31	FBXO31	Endothelial_cells
-2.49501	-1.37007	-5.06587	0.00155481651885785	0.0865171547935709	-0.658702	Endothelial_cells__APOL6	APOL6	Endothelial_cells
-2.46106	0.781517106755601	-5.06328	0.00155924224667015	0.0865171547935709	-0.661474	Endothelial_cells__CD36	CD36	Endothelial_cells
2.22309772858482	-2.04678	5.04726330225465	0.00158692638555826	0.0870897336215912	-0.678639	Endothelial_cells__MZT2A	MZT2A	Endothelial_cells
2.28396801080522	-0.267735	5.04522520990342	0.00159048894755279	0.0870897336215912	-0.680827	Endothelial_cells__MYO1E	MYO1E	Endothelial_cells
9.80549664145502	3.92107217808907	5.02614310416455	0.0016242797305095	0.0883586940982388	-0.701343	Endothelial_cells__MYO18A	MYO18A	Endothelial_cells
-4.04047	0.882339229246968	-5.01243	0.00164905480146329	0.0889960868579368	-0.716123	Endothelial_cells__AFF3	AFF3	Endothelial_cells
2.90960819188245	-0.282139	5.00787342019857	0.00165738236969605	0.0889960868579368	-0.721042	Endothelial_cells__MGLL	MGLL	Endothelial_cells
-2.27415	-1.53546	-4.98388	0.00170200384707557	0.09080626935391	-0.746997	Endothelial_cells__MATK	MATK	Endothelial_cells
3.44052315717334	1.1738550413042	4.96095231797781	0.00174589214292798	0.0921456450284453	-0.771886	Endothelial_cells__HIF1A	HIF1A	Endothelial_cells
2.31007141799642	0.447904972848662	4.95538403219799	0.00175674051442209	0.0921456450284453	-0.777944	Endothelial_cells__PFDN2	PFDN2	Endothelial_cells
-1.7792	-0.783391	-4.95355	0.00176032170605825	0.0921456450284453	-0.779936	Endothelial_cells__NEK7	NEK7	Endothelial_cells
2.43331453160315	-1.19109	4.9455233419921	0.00177613600083643	0.0923923745935099	-0.788684	Endothelial_cells__C12ORF45	C12ORF45	Endothelial_cells
-1.66332	1.70590260237104	-4.92977	0.00180762333824547	0.092837208307498	-0.805879	Endothelial_cells__PAK4	PAK4	Endothelial_cells
-2.04023	2.22846422571649	-4.92668	0.00181386676235544	0.092837208307498	-0.809254	Endothelial_cells__PRKCE	PRKCE	Endothelial_cells
-2.58234	-0.103303	-4.90025	0.00186829493377429	0.092837208307498	-0.838202	Endothelial_cells__IL7R	IL7R	Endothelial_cells
2.07879122324632	-1.7116	4.89648148968353	0.00187620534085766	0.092837208307498	-0.842341	Endothelial_cells__C9ORF16	C9ORF16	Endothelial_cells
1.85415577911406	1.23215864226891	4.88986528045837	0.00189017920336698	0.092837208307498	-0.84961	Endothelial_cells__DHX33	DHX33	Endothelial_cells
1.69757286363648	-0.635942	4.88722144429333	0.00189579547845772	0.092837208307498	-0.852517	Endothelial_cells__CNN2	CNN2	Endothelial_cells
2.3232984696025	-1.36771	4.87824323138298	0.00191500671176908	0.092837208307498	-0.862397	Endothelial_cells__CNPY2	CNPY2	Endothelial_cells
-2.25999	4.52138627099363	-4.87448	0.00192312326469544	0.092837208307498	-0.866542	Endothelial_cells__SLC9A3R2	SLC9A3R2	Endothelial_cells
2.96515054111226	-3.45685	4.87210862867665	0.00192825771385719	0.092837208307498	-0.869155	Endothelial_cells__PLP2	PLP2	Endothelial_cells
2.61471599265249	-1.75678	4.8674820267304	0.0019383187857989	0.092837208307498	-0.874257	Endothelial_cells__EXOSC5	EXOSC5	Endothelial_cells
-1.67702	-0.151478	-4.86148	0.00195144845281527	0.092837208307498	-0.880875	Endothelial_cells__ZNF765	ZNF765	Endothelial_cells
-2.72454	-3.15026	-4.85746	0.0019603069713941	0.092837208307498	-0.885316	Endothelial_cells__RNF135	RNF135	Endothelial_cells
-2.33861	-0.866352	-4.85322	0.00196969905552729	0.092837208307498	-0.890003	Endothelial_cells__UNC13B	UNC13B	Endothelial_cells
-3.20145	-0.387951	-4.84824	0.00198078755257337	0.092837208307498	-0.895508	Endothelial_cells__IL18R1	IL18R1	Endothelial_cells
3.33196014970344	-1.62476	4.84218629132398	0.00199436911268476	0.092837208307498	-0.902211	Endothelial_cells__OST4	OST4	Endothelial_cells
2.47600139929612	-1.33376	4.84074208483267	0.00199762310875208	0.092837208307498	-0.90381	Endothelial_cells__DAP	DAP	Endothelial_cells
3.73804917771671	1.84938598467494	4.83988853766616	0.00199954904100292	0.092837208307498	-0.904755	Endothelial_cells__CCDC3	CCDC3	Endothelial_cells
1.76143178629167	-2.13605	4.83805473675495	0.00200369378534762	0.092837208307498	-0.906787	Endothelial_cells__VEGFB	VEGFB	Endothelial_cells
3.12218963434911	0.610513312704565	4.83351388463385	0.00201399812775165	0.092837208307498	-0.911819	Endothelial_cells__DUSP23	DUSP23	Endothelial_cells
2.6859010814698	2.04670925741164	4.83184999552664	0.00201778863976791	0.092837208307498	-0.913664	Endothelial_cells__EIF2S2	EIF2S2	Endothelial_cells
2.14075381803987	-0.383885	4.83135069888224	0.00201892763470589	0.092837208307498	-0.914218	Endothelial_cells__MAN1C1	MAN1C1	Endothelial_cells
2.6545903707624	-0.862552	4.81761708016738	0.00205053846935995	0.0937727015411145	-0.929464	Endothelial_cells__PRDX4	PRDX4	Endothelial_cells
-1.83326	-2.14984	-4.79668	0.00209979167446785	0.0950206341600793	-0.952767	Endothelial_cells__ARHGAP4	ARHGAP4	Endothelial_cells
2.13654717145631	-2.42912	4.79524179625086	0.00210322406266203	0.0950206341600793	-0.954371	Endothelial_cells__GRAMD4	GRAMD4	Endothelial_cells
2.18717509492758	-0.58197	4.79154310794385	0.0021120770539006	0.0950206341600793	-0.958497	Endothelial_cells__AHI1	AHI1	Endothelial_cells
2.17630842564501	-1.62563	4.77921884254344	0.00214187573183677	0.0958431812692334	-0.972259	Endothelial_cells__MOB3B	MOB3B	Endothelial_cells
-2.90585	-4.17406	-4.75363	0.00220525931836534	0.0979279951045897	-1.00092	Endothelial_cells__TNS3	TNS3	Endothelial_cells
-1.68166	-0.0614053	-4.75095	0.00221199844763461	0.0979279951045897	-1.00392	Endothelial_cells__KIAA1324L	KIAA1324L	Endothelial_cells
1.76904648142286	1.1932543621142	4.74521300343917	0.00222654681722632	0.0980505246548923	-1.01036	Endothelial_cells__HACD3	HACD3	Endothelial_cells
2.1770334596743	0.564264614890048	4.72326319698824	0.00228316954912278	0.100014842933415	-1.03506	Endothelial_cells__NOB1	NOB1	Endothelial_cells
1.60715131906284	1.55191631769686	4.7041061252508	0.00233389543958694	0.101261353721149	-1.05669	Endothelial_cells__EML4	EML4	Endothelial_cells
-1.70629	1.07483191038396	-4.70334	0.00233595817787583	0.101261353721149	-1.05756	Endothelial_cells__CAPZA2	CAPZA2	Endothelial_cells
-1.55475	2.36870481068252	-4.68545	0.00238449073483432	0.101772681872578	-1.0778	Endothelial_cells__GIMAP8	GIMAP8	Endothelial_cells
-2.05497	0.0616015913303084	-4.68381	0.00238900052574753	0.101772681872578	-1.07966	Endothelial_cells__CD274	CD274	Endothelial_cells
-2.1322	2.85277327406526	-4.67979	0.00240008404978595	0.101772681872578	-1.08422	Endothelial_cells__PPARGC1B	PPARGC1B	Endothelial_cells
-3.12916	-1.42943	-4.67634	0.00240964527770081	0.101772681872578	-1.08813	Endothelial_cells__ZNF618	ZNF618	Endothelial_cells
1.68197178168981	-1.54897	4.6736285181592	0.00241719290515545	0.101772681872578	-1.09121	Endothelial_cells__SLBP	SLBP	Endothelial_cells
-1.77828	-2.54587	-4.66555	0.00243983431324352	0.101772681872578	-1.1004	Endothelial_cells__ZNF655	ZNF655	Endothelial_cells
1.6992299222418	2.12628188931112	4.66111328772369	0.00245234819331874	0.101772681872578	-1.10544	Endothelial_cells__MAPK12	MAPK12	Endothelial_cells
3.14617703407439	-1.30981	4.65962085244922	0.00245657813203322	0.101772681872578	-1.10714	Endothelial_cells__NBEA	NBEA	Endothelial_cells
-1.76766	-0.254505	-4.65919	0.00245780476467477	0.101772681872578	-1.10763	Endothelial_cells__TMEM135	TMEM135	Endothelial_cells
-2.76445	-3.95779	-4.64822	0.00248915285765631	0.102254450951406	-1.12012	Endothelial_cells__MKRN1	MKRN1	Endothelial_cells
-1.54678	-0.880123	-4.64654	0.00249401099881478	0.102254450951406	-1.12204	Endothelial_cells__FAM3A	FAM3A	Endothelial_cells
-3.00133	-0.82778	-4.63234	0.00253533907801797	0.103439348756586	-1.13824	Endothelial_cells__EXPH5	EXPH5	Endothelial_cells
1.93314921065238	0.1221936704214	4.61368484483287	0.00259081125391651	0.10518693690901	-1.15958	Endothelial_cells__GLIS3	GLIS3	Endothelial_cells
3.14610198487377	-2.38957	4.60944252345835	0.00260361229216316	0.105193519940165	-1.16444	Endothelial_cells__GPI	GPI	Endothelial_cells
1.58693583609388	0.691452682788963	4.60118135351667	0.00262874158031781	0.105695730304276	-1.17392	Endothelial_cells__SBNO2	SBNO2	Endothelial_cells
1.98561042229495	0.571668906830297	4.59510023935735	0.00264741110060467	0.105742165568986	-1.1809	Endothelial_cells__LAMC1	LAMC1	Endothelial_cells
-2.04862	1.0867999383009	-4.59254	0.00265530609202428	0.105742165568986	-1.18384	Endothelial_cells__STX12	STX12	Endothelial_cells
-1.63399	0.0422555121899422	-4.58086	0.00269170599349472	0.106681280875508	-1.19727	Endothelial_cells__MAP4K2	MAP4K2	Endothelial_cells
1.89628226085693	-1.18342	4.57619370453287	0.00270640004255664	0.106755296465398	-1.20265	Endothelial_cells__CLIP2	CLIP2	Endothelial_cells
2.95781414616597	-1.58391	4.57158257413674	0.00272100668561962	0.106825182284963	-1.20796	Endothelial_cells__HMGN1	HMGN1	Endothelial_cells
-3.05958	0.751176854052969	-4.56704	0.00273546989043243	0.106888807033189	-1.21319	Endothelial_cells__RPN1	RPN1	Endothelial_cells
-1.49972	1.49318776248665	-4.55392	0.00277778504024324	0.10803506957918	-1.22835	Endothelial_cells__TSPAN14	TSPAN14	Endothelial_cells
1.87385774307872	-0.0570656	4.53188010775129	0.00285044490845576	0.109715021056455	-1.25386	Endothelial_cells__RTKN	RTKN	Endothelial_cells
-1.50808	-0.776178	-4.53017	0.00285618281673771	0.109715021056455	-1.25584	Endothelial_cells__SENP2	SENP2	Endothelial_cells
-1.47386	-1.32174	-4.52733	0.00286571144555574	0.109715021056455	-1.25913	Endothelial_cells__MADD	MADD	Endothelial_cells
2.67760681235507	-1.28043	4.52225796947971	0.00288283128790501	0.109715021056455	-1.26502	Endothelial_cells__KCNJ15	KCNJ15	Endothelial_cells
-1.67985	1.59075986479711	-4.52106	0.00288689049758063	0.109715021056455	-1.26641	Endothelial_cells__TOX2	TOX2	Endothelial_cells
-1.65636	-1.42869	-4.50584	0.00293904196965887	0.111074715824643	-1.28411	Endothelial_cells__SSH2	SSH2	Endothelial_cells
1.4822326002741	-0.48032	4.50279111829917	0.00294960539491912	0.111074715824643	-1.28765	Endothelial_cells__LY96	LY96	Endothelial_cells
1.68186277740732	0.336072213449174	4.49902959423103	0.0029627041827551	0.111074715824643	-1.29203	Endothelial_cells__PPAT	PPAT	Endothelial_cells
3.56288018708576	0.330846741769551	4.47842245140849	0.0030356158703325	0.11329789636223	-1.31607	Endothelial_cells__ARHGAP20	ARHGAP20	Endothelial_cells
1.66102834978501	0.563695548542734	4.47120224465903	0.0030616297642425	0.113730284984552	-1.32451	Endothelial_cells__TRMT10C	TRMT10C	Endothelial_cells
2.41284154228401	1.03439468874938	4.46764684041485	0.00307453011192169	0.113730284984552	-1.32867	Endothelial_cells__CPVL	CPVL	Endothelial_cells
1.67956074869025	1.61514629741255	4.46321808765969	0.00309068340575747	0.113821937991679	-1.33386	Endothelial_cells__CMIP	CMIP	Endothelial_cells
1.54437791021841	0.89738408941806	4.45913399604149	0.00310566276498134	0.11386974093806	-1.33864	Endothelial_cells__EPS8	EPS8	Endothelial_cells
1.45854761239811	0.217534094352178	4.45233179722661	0.0031307898512329	0.114287561104436	-1.34662	Endothelial_cells__JMJD8	JMJD8	Endothelial_cells
3.25173756042492	1.22651156061668	4.44456423811067	0.00315975806309148	0.114841337812709	-1.35573	Endothelial_cells__GNL3	GNL3	Endothelial_cells
1.89350259180538	0.196615878622925	4.43779366043298	0.00318524986243552	0.11526449828283	-1.36368	Endothelial_cells__SNAPC1	SNAPC1	Endothelial_cells
-1.95638	-0.970165	-4.42791	0.00322285867871852	0.11612057481807	-1.3753	Endothelial_cells__PCSK6	PCSK6	Endothelial_cells
2.3841028896518	2.31166690661752	4.42401633952134	0.00323782722009195	0.116157051520799	-1.37989	Endothelial_cells__PLCB1	PLCB1	Endothelial_cells
-1.52169	-0.470731	-4.41036	0.00329088190078245	0.117553691245546	-1.39599	Endothelial_cells__APPL2	APPL2	Endothelial_cells
-1.98476	-0.270511	-4.40486	0.00331252848634251	0.117582837101464	-1.40248	Endothelial_cells__SRP9	SRP9	Endothelial_cells
1.94792652090923	-0.473189	4.40298326653541	0.0033199527476684	0.117582837101464	-1.4047	Endothelial_cells__FBLN2	FBLN2	Endothelial_cells
2.1609769869888	-0.764028	4.39630518908984	0.00334650699730304	0.117638841431621	-1.41259	Endothelial_cells__ZNRD1	ZNRD1	Endothelial_cells
2.22828898254185	-3.07931	4.39307778996985	0.00335942419332741	0.117638841431621	-1.41641	Endothelial_cells__PABPC4	PABPC4	Endothelial_cells
-3.35703	-1.52462	-4.39174	0.00336477973514297	0.117638841431621	-1.41798	Endothelial_cells__PDE5A	PDE5A	Endothelial_cells
1.45985490911712	-1.08668	4.3847704828687	0.00339292691292968	0.117638841431621	-1.42624	Endothelial_cells__FAM136A	FAM136A	Endothelial_cells
1.48229136208388	-1.0393	4.38339864268579	0.00339849484117167	0.117638841431621	-1.42786	Endothelial_cells__TTC23	TTC23	Endothelial_cells
-2.3973	-0.781824	-4.37994	0.0034125720004397	0.117638841431621	-1.43196	Endothelial_cells__P2RY1	P2RY1	Endothelial_cells
-3.41451	1.08536471060534	-4.37642	0.00342699494734639	0.117638841431621	-1.43614	Endothelial_cells__TMEM38A	TMEM38A	Endothelial_cells
3.52076901033427	-0.189036	4.37456090733151	0.00343460752948262	0.117638841431621	-1.43834	Endothelial_cells__SESN3	SESN3	Endothelial_cells
1.80732004740883	-2.74978	4.36787455989418	0.00346221070253932	0.118098277365716	-1.44627	Endothelial_cells__CKS1B	CKS1B	Endothelial_cells
1.48363556329138	-1.46385	4.35076898141899	0.00353394836432192	0.120053274433679	-1.4666	Endothelial_cells__HDHD3	HDHD3	Endothelial_cells
-1.59282	0.0165966895233988	-4.33688	0.00359338986440427	0.121576357079011	-1.48314	Endothelial_cells__PLAGL1	PLAGL1	Endothelial_cells
-1.75741	-1.28343	-4.32761	0.00363370599138631	0.122305217354549	-1.49421	Endothelial_cells__CTDSPL	CTDSPL	Endothelial_cells
-4.00584	-0.432215	-4.32519	0.00364432222803413	0.122305217354549	-1.4971	Endothelial_cells__SULT1A1	SULT1A1	Endothelial_cells
2.49320137256135	41.7545823693898	4.3143684527024	0.0036921266646919	0.123411928635465	-1.51003	Endothelial_cells__SERF2	SERF2	Endothelial_cells
-2.88006	0.561323739739857	-4.29283	0.00378939758321969	0.125824853222602	-1.53583	Endothelial_cells__ZNF449	ZNF449	Endothelial_cells
2.01732122917632	2.65189596673947	4.29170417525108	0.00379454982084261	0.125824853222602	-1.53718	Endothelial_cells__EIF3J	EIF3J	Endothelial_cells
3.71901937737368	2.93164894179161	4.28250790185647	0.00383699906842966	0.126727552565635	-1.54822	Endothelial_cells__RUNDC3B	RUNDC3B	Endothelial_cells
-2.49587	2.34795939424594	-4.27436	0.00387504500368105	0.127478259152717	-1.55802	Endothelial_cells__DAAM1	DAAM1	Endothelial_cells
2.40608348406741	-5.81945	4.26860117809991	0.00390218889775007	0.127865819669188	-1.56495	Endothelial_cells__PTK2B	PTK2B	Endothelial_cells
-1.44982	-0.835612	-4.25605	0.00396205807917444	0.129318468207721	-1.58007	Endothelial_cells__REEP3	REEP3	Endothelial_cells
1.44841551075451	-1.57933	4.2389225154257	0.00404543170147777	0.130936472194727	-1.60075	Endothelial_cells__NDUFB2	NDUFB2	Endothelial_cells
1.80385919836936	-2.37076	4.23752465077553	0.00405231980745297	0.130936472194727	-1.60244	Endothelial_cells__GPRC5A	GPRC5A	Endothelial_cells
-1.53531	2.66675939330662	-4.23357	0.00407187863423742	0.130936472194727	-1.60723	Endothelial_cells__F8	F8	Endothelial_cells
1.8129987144132	2.10075413293953	4.23195092009192	0.00407991357847703	0.130936472194727	-1.60918	Endothelial_cells__MAP7D3	MAP7D3	Endothelial_cells
2.87368859787481	-0.828429	4.22986571561184	0.00409028989194148	0.130936472194727	-1.61171	Endothelial_cells__NLN	NLN	Endothelial_cells
2.32927189861766	-0.305748	4.22290272408731	0.00412514993062954	0.131463845778808	-1.62014	Endothelial_cells__KLHL4	KLHL4	Endothelial_cells
1.72969509638962	-0.679074	4.22028205288526	0.00413835487132615	0.131463845778808	-1.62332	Endothelial_cells__MYO5C	MYO5C	Endothelial_cells
1.66635379375044	1.16358161669343	4.20986714419927	0.00419129497104503	0.132639346174935	-1.63595	Endothelial_cells__UHRF2	UHRF2	Endothelial_cells
1.79877367698936	-0.754624	4.20580676817886	0.00421213589830091	0.132793966218025	-1.64088	Endothelial_cells__POLR3E	POLR3E	Endothelial_cells
-1.60337	0.871003489400687	-4.19794	0.00425284780628891	0.133146373383725	-1.65044	Endothelial_cells__NCOA3	NCOA3	Endothelial_cells
1.40127352104084	-0.120464	4.19443328907751	0.00427112287651217	0.133146373383725	-1.6547	Endothelial_cells__HMG20B	HMG20B	Endothelial_cells
-1.58666	-0.3779	-4.1944	0.00427130622293099	0.133146373383725	-1.65474	Endothelial_cells__IPP	IPP	Endothelial_cells
1.68382555011389	-0.442656	4.18615885215961	0.00431460826188406	0.133994345386795	-1.66477	Endothelial_cells__PGAM5	PGAM5	Endothelial_cells
1.59214388559502	-0.435842	4.17474592586718	0.00437538896961721	0.135001406852452	-1.67868	Endothelial_cells__SIAE	SIAE	Endothelial_cells
2.20261800413157	-1.26985	4.1739847378037	0.00437947613242366	0.135001406852452	-1.67961	Endothelial_cells__ZDHHC13	ZDHHC13	Endothelial_cells
2.04089737747812	-1.56827	4.16275425690273	0.00444026826612474	0.136055145756822	-1.69332	Endothelial_cells__IGBP1	IGBP1	Endothelial_cells
1.7679927360219	2.82202632147493	4.15577769762191	0.00447850035476482	0.136055145756822	-1.70184	Endothelial_cells__CD74	CD74	Endothelial_cells
-1.64896	1.25587266177366	-4.15322	0.00449261377898982	0.136055145756822	-1.70497	Endothelial_cells__MYO6	MYO6	Endothelial_cells
-1.61956	1.38696697383801	-4.15119	0.00450384189609196	0.136055145756822	-1.70746	Endothelial_cells__STARD3	STARD3	Endothelial_cells
1.69732108083122	0.718298406252075	4.14768171851563	0.00452332136029951	0.136055145756822	-1.71175	Endothelial_cells__ATP1A1	ATP1A1	Endothelial_cells
2.30799006219532	0.890564072760057	4.14335408489415	0.00454748213572458	0.136055145756822	-1.71705	Endothelial_cells__BYSL	BYSL	Endothelial_cells
2.26152009651968	4.19566999107142	4.14254989160076	0.004551987485461	0.136055145756822	-1.71803	Endothelial_cells__ACTN1	ACTN1	Endothelial_cells
1.39220317649116	-0.356159	4.14105491514857	0.00456037587063732	0.136055145756822	-1.71986	Endothelial_cells__SH3TC1	SH3TC1	Endothelial_cells
-1.61328	2.27150598287539	-4.14098	0.00456078164918337	0.136055145756822	-1.71995	Endothelial_cells__FGR	FGR	Endothelial_cells
-1.44729	-0.146171	-4.13073	0.00461879394237127	0.136412606402116	-1.73253	Endothelial_cells__ZNF500	ZNF500	Endothelial_cells
4.01849047759438	0.460675632476885	4.12750180913463	0.00463720307828352	0.136412606402116	-1.73649	Endothelial_cells__RAB13	RAB13	Endothelial_cells
-2.06442	-1.24883	-4.12533	0.00464964373281988	0.136412606402116	-1.73915	Endothelial_cells__SLC17A5	SLC17A5	Endothelial_cells
1.63179825917198	-0.99023	4.12499354620066	0.00465157684065215	0.136412606402116	-1.73957	Endothelial_cells__PTGS2	PTGS2	Endothelial_cells
1.76591244863388	0.55360955014056	4.11987107125326	0.0046810838625173	0.136412606402116	-1.74586	Endothelial_cells__TERF2	TERF2	Endothelial_cells
1.59054192040242	-0.394431	4.11857108608281	0.00468860485744857	0.136412606402116	-1.74746	Endothelial_cells__PDK1	PDK1	Endothelial_cells
-2.22895	-3.17141	-4.11656	0.00470029219863449	0.136412606402116	-1.74993	Endothelial_cells__NABP1	NABP1	Endothelial_cells
2.14077057855758	-2.95268	4.11593734192201	0.00470388297938331	0.136412606402116	-1.75069	Endothelial_cells__LIMD1	LIMD1	Endothelial_cells
-1.82679	0.0753195565430886	-4.09234	0.00484324737500894	0.139531168002738	-1.77975	Endothelial_cells__EVI5	EVI5	Endothelial_cells
1.71106295579887	-0.599549	4.09165914089558	0.00484732331662082	0.139531168002738	-1.78059	Endothelial_cells__COPRS	COPRS	Endothelial_cells
1.52177013443703	0.766093921973376	4.08883425429934	0.00486432296156843	0.139531168002738	-1.78408	Endothelial_cells__SYBU	SYBU	Endothelial_cells
-1.8003	1.28442315997067	-4.08489	0.00488817630289927	0.139531168002738	-1.78895	Endothelial_cells__TPM1	TPM1	Endothelial_cells
2.15955539398512	3.53328252677532e-05	4.08372398352183	0.00489524222717765	0.139531168002738	-1.79038	Endothelial_cells__MDK	MDK	Endothelial_cells
1.74433799659437	0.726880906955775	4.07230887765862	0.00496509074805079	0.140892378986263	-1.80449	Endothelial_cells__RBMX	RBMX	Endothelial_cells
1.9741282095001	1.24738493900977	4.07040373537567	0.00497685443012873	0.140892378986263	-1.80685	Endothelial_cells__ACTG1	ACTG1	Endothelial_cells
-1.63949	-0.529486	-4.06715	0.00499702200504364	0.140983776772807	-1.81087	Endothelial_cells__TMEM9B	TMEM9B	Endothelial_cells
-2.62489	0.765031156736912	-4.06183	0.0050301584600476	0.141439219131676	-1.81746	Endothelial_cells__ST8SIA6	ST8SIA6	Endothelial_cells
2.55788223011994	0.604299063071188	4.05599596039651	0.00506681514617568	0.141739727552999	-1.82469	Endothelial_cells__TMEM70	TMEM70	Endothelial_cells
2.13258681899504	-0.922068	4.04689639429537	0.00512455069750904	0.141739727552999	-1.83597	Endothelial_cells__GOLM1	GOLM1	Endothelial_cells
2.76437897120968	4.61394476051432	4.04285999724453	0.00515039193035162	0.141739727552999	-1.84098	Endothelial_cells__THBS1	THBS1	Endothelial_cells
-1.32705	6.85445324889202	-4.04057	0.00516509556885272	0.141739727552999	-1.84382	Endothelial_cells__LAMP1	LAMP1	Endothelial_cells
1.63953807300089	-1.96393	4.03780126147642	0.00518298032002433	0.141739727552999	-1.84727	Endothelial_cells__METRNL	METRNL	Endothelial_cells
1.40276989990385	3.06135646517432	4.03734055689954	0.00518595940140215	0.141739727552999	-1.84784	Endothelial_cells__PKM	PKM	Endothelial_cells
-2.2792	-1.64064	-4.0365	0.0051914126352287	0.141739727552999	-1.84889	Endothelial_cells__ZFP30	ZFP30	Endothelial_cells
1.45206362938666	-1.39024	4.03408805822316	0.00520704475157491	0.141739727552999	-1.85188	Endothelial_cells__STMN1	STMN1	Endothelial_cells
-1.49298	-1.33942	-4.0333	0.00521216916386229	0.141739727552999	-1.85286	Endothelial_cells__MAP3K5	MAP3K5	Endothelial_cells
2.65438500380172	-2.27953	4.02764091844844	0.00524911890386135	0.141739727552999	-1.8599	Endothelial_cells__BCKDK	BCKDK	Endothelial_cells
-2.57381	0.457871044509338	-4.02417	0.00527189384411444	0.141739727552999	-1.86421	Endothelial_cells__NMD3	NMD3	Endothelial_cells
1.83702034426689	-2.36983	4.0185959943005	0.00530877612742586	0.141739727552999	-1.87116	Endothelial_cells__PHLDA2	PHLDA2	Endothelial_cells
1.76149641116536	-1.76031	4.01205377492132	0.00535238973944034	0.141739727552999	-1.87931	Endothelial_cells__MARVELD1	MARVELD1	Endothelial_cells
-2.03747	-0.480586	-4.01062	0.0053619957607466	0.141739727552999	-1.8811	Endothelial_cells__OCLN	OCLN	Endothelial_cells
-1.38993	-0.593345	-4.00751	0.00538292111996212	0.141739727552999	-1.88498	Endothelial_cells__EEPD1	EEPD1	Endothelial_cells
2.66654185803479	-0.734593	4.00658639325351	0.00538913942219505	0.141739727552999	-1.88613	Endothelial_cells__TIMM10	TIMM10	Endothelial_cells
-1.39917	1.18685312511912	-4.00434	0.00540432394728655	0.141739727552999	-1.88894	Endothelial_cells__WWC3	WWC3	Endothelial_cells
1.46769563689812	-1.26106	4.00159521635493	0.00542292990509623	0.141739727552999	-1.89236	Endothelial_cells__NHSL1	NHSL1	Endothelial_cells
2.10334305854399	1.27506663121029	4.00083206036735	0.00542811694716892	0.141739727552999	-1.89331	Endothelial_cells__ABI3	ABI3	Endothelial_cells
2.46085519970385	-0.593364	4.0005877312422	0.00542977876017157	0.141739727552999	-1.89362	Endothelial_cells__NUTF2	NUTF2	Endothelial_cells
-2.36122	-0.307494	-3.99923	0.0054389993159508	0.141739727552999	-1.89531	Endothelial_cells__CMPK2	CMPK2	Endothelial_cells
1.3549184136099	0.377461286041888	3.99721979583097	0.00545274281337694	0.141739727552999	-1.89782	Endothelial_cells__EMC10	EMC10	Endothelial_cells
1.45207947876344	-0.171107	3.98368465764902	0.00554611084824127	0.141739727552999	-1.91475	Endothelial_cells__MYO1B	MYO1B	Endothelial_cells
1.50254967881678	1.37161615896837	3.98250149405244	0.00555435544737036	0.141739727552999	-1.91623	Endothelial_cells__ATP11C	ATP11C	Endothelial_cells
4.34281533717797	0.564235724382438	3.98090191020324	0.00556552313556805	0.141739727552999	-1.91823	Endothelial_cells__AQP3	AQP3	Endothelial_cells
2.52459971008666	-0.0920795	3.98018505192257	0.00557053595127933	0.141739727552999	-1.91913	Endothelial_cells__RFX2	RFX2	Endothelial_cells
1.41184758709356	3.13427836300375	3.97945368600004	0.00557565531489254	0.141739727552999	-1.92004	Endothelial_cells__CFAP20	CFAP20	Endothelial_cells
2.37871512407786	-4.08229	3.97843154943223	0.00558281863407781	0.141739727552999	-1.92132	Endothelial_cells__RGS2	RGS2	Endothelial_cells
-1.54413	1.61302405007147	-3.9778	0.00558723239202279	0.141739727552999	-1.92211	Endothelial_cells__CCDC68	CCDC68	Endothelial_cells
-1.95925	3.02402535926346	-3.97743	0.00558985979805084	0.141739727552999	-1.92258	Endothelial_cells__SH3BP5	SH3BP5	Endothelial_cells
2.52094455021574	7.32623101451489	3.97671059634864	0.00559490218143943	0.141739727552999	-1.92348	Endothelial_cells__CTSC	CTSC	Endothelial_cells
-2.15936	-0.490767	-3.97377	0.0056156079713717	0.141739727552999	-1.92716	Endothelial_cells__MARCH2	2025-03-02	Endothelial_cells
1.37521447696787	-0.18355	3.97366931321115	0.00561632646495211	0.141739727552999	-1.92729	Endothelial_cells__PLEKHF1	PLEKHF1	Endothelial_cells
-1.29205	-0.774446	-3.97317	0.00561986183978009	0.141739727552999	-1.92792	Endothelial_cells__UBR7	UBR7	Endothelial_cells
3.55327961178007	0.936382653633962	3.96880692665793	0.00565076647203869	0.142088608298423	-1.93338	Endothelial_cells__ZNF593	ZNF593	Endothelial_cells
2.41064492701043	1.42030197425689	3.9583643146252	0.00572551557434285	0.142510480579699	-1.94649	Endothelial_cells__GRAMD1A	GRAMD1A	Endothelial_cells
-6.86037	21.3071	-3.95144	0.00577566207012966	0.142510480579699	-1.95518	Endothelial_cells__AREG	AREG	Endothelial_cells
1.88728286000202	2.40625721287137	3.94949652422355	0.00578984277241625	0.142510480579699	-1.95763	Endothelial_cells__DDX21	DDX21	Endothelial_cells
2.31293165102539	-2.95272	3.94861117036373	0.00579630848517267	0.142510480579699	-1.95874	Endothelial_cells__BID	BID	Endothelial_cells
1.31172349402467	-0.747205	3.94798967415266	0.00580085197694986	0.142510480579699	-1.95952	Endothelial_cells__SIK3	SIK3	Endothelial_cells
-1.53754	1.2646252934237	-3.94392	0.00583066529208125	0.142510480579699	-1.96463	Endothelial_cells__CPM	CPM	Endothelial_cells
4.53293337287875	-4.93772	3.94122206413701	0.00585058032205386	0.142510480579699	-1.96803	Endothelial_cells__TMED3	TMED3	Endothelial_cells
-1.53322	0.781368088799521	-3.93974	0.00586151674229279	0.142510480579699	-1.9699	Endothelial_cells__SERINC1	SERINC1	Endothelial_cells
2.04235719823905	-0.509678	3.93931938167899	0.00586464514895419	0.142510480579699	-1.97043	Endothelial_cells__UBALD2	UBALD2	Endothelial_cells
-2.20309	-1.28975	-3.93585	0.0058903851503677	0.142510480579699	-1.97479	Endothelial_cells__IFI27L2	IFI27L2	Endothelial_cells
-1.7167	0.691907235441892	-3.93547	0.00589321404561576	0.142510480579699	-1.97527	Endothelial_cells__YIPF6	YIPF6	Endothelial_cells
-1.61635	0.138456019433279	-3.932	0.00591908804803441	0.142510480579699	-1.97964	Endothelial_cells__CTDSP2	CTDSP2	Endothelial_cells
-2.58959	1.19545286758654	-3.93103	0.00592635538003088	0.142510480579699	-1.98087	Endothelial_cells__CLIC5	CLIC5	Endothelial_cells
-1.75524	2.30154365245293	-3.93006	0.00593365368618977	0.142510480579699	-1.98209	Endothelial_cells__ST6GALNAC3	ST6GALNAC3	Endothelial_cells
-1.9486	0.411726219300516	-3.93002	0.00593392562330945	0.142510480579699	-1.98214	Endothelial_cells__NSL1	NSL1	Endothelial_cells
3.09462795416854	-1.03207	3.92900944910708	0.00594150387614508	0.142510480579699	-1.98341	Endothelial_cells__TIMM13	TIMM13	Endothelial_cells
1.99356371258136	-0.0594328	3.92365248010203	0.00598187390805798	0.143066484301053	-1.99017	Endothelial_cells__ZNF579	ZNF579	Endothelial_cells
1.35045501861057	-1.07094	3.90758555992215	0.00610476531803189	0.145587282928308	-2.01045	Endothelial_cells__CHID1	CHID1	Endothelial_cells
-1.44113	-0.086318	-3.90319	0.00613888286769898	0.145681523188514	-2.01601	Endothelial_cells__MPPE1	MPPE1	Endothelial_cells
1.52306983360044	1.13710277767798	3.90256585562882	0.00614372397442852	0.145681523188514	-2.0168	Endothelial_cells__GADD45A	GADD45A	Endothelial_cells
2.82193348650458	2.0093551491881	3.89828295721225	0.0061771792694043	0.146058701872875	-2.02222	Endothelial_cells__NDRG1	NDRG1	Endothelial_cells
-1.48811	0.153940990077718	-3.89553	0.00619881273260157	0.146155009556495	-2.0257	Endothelial_cells__TOR4A	TOR4A	Endothelial_cells
1.70149513772138	-0.621877	3.88966449902495	0.00624510684859562	0.146768982374464	-2.03313	Endothelial_cells__SLC6A6	SLC6A6	Endothelial_cells
1.26256124547689	-0.508153	3.88325787287624	0.00629613091480816	0.146768982374464	-2.04125	Endothelial_cells__RCC2	RCC2	Endothelial_cells
4.13235077147694	-2.85312	3.88139939481138	0.00631101750451668	0.146768982374464	-2.0436	Endothelial_cells__SLC25A6	SLC25A6	Endothelial_cells
1.51083195980129	-1.49806	3.87987154070284	0.00632328459403197	0.146768982374464	-2.04554	Endothelial_cells__MTHFS	MTHFS	Endothelial_cells
-2.36733	0.133954027582347	-3.87924	0.00632833512864648	0.146768982374464	-2.04634	Endothelial_cells__HSD17B12	HSD17B12	Endothelial_cells
-1.38116	-0.346799	-3.87775	0.00634037047637478	0.146768982374464	-2.04823	Endothelial_cells__ZNF200	ZNF200	Endothelial_cells
1.33174455184437	0.309221746995669	3.87624165956907	0.00635253347494481	0.146768982374464	-2.05015	Endothelial_cells__ABLIM3	ABLIM3	Endothelial_cells
2.17692939839777	1.7219207521444	3.87458569043136	0.00636592606478212	0.146768982374464	-2.05225	Endothelial_cells__RASGRF2	RASGRF2	Endothelial_cells
1.75496670541461	0.10559035200812	3.87096580113686	0.00639530941184751	0.146976604394266	-2.05684	Endothelial_cells__LDOC1	LDOC1	Endothelial_cells
1.81401242718383	-3.74239	3.86913220772095	0.00641024959691442	0.146976604394266	-2.05917	Endothelial_cells__UBE2F	UBE2F	Endothelial_cells
-2.00211	-2.21062	-3.8648	0.0064456893495321	0.147205298672306	-2.06467	Endothelial_cells__PTX3	PTX3	Endothelial_cells
1.41155389802833	1.44389983298826	3.86221288972126	0.00646697306524703	0.147205298672306	-2.06796	Endothelial_cells__HABP4	HABP4	Endothelial_cells
1.58470723355401	0.258209777833253	3.8598578423155	0.00648640433677035	0.147205298672306	-2.07096	Endothelial_cells__GMDS	GMDS	Endothelial_cells
1.95789237309949	-2.79526	3.85930558910358	0.00649097015652243	0.147205298672306	-2.07166	Endothelial_cells__ZNF581	ZNF581	Endothelial_cells
1.79515648253271	2.3222919673259	3.85566414438525	0.00652116432490283	0.147488181185234	-2.07629	Endothelial_cells__FAM124B	FAM124B	Endothelial_cells
1.46487731662661	-0.0810206	3.85156475543808	0.00655533947561922	0.147650813030618	-2.08151	Endothelial_cells__PRR7	PRR7	Endothelial_cells
-1.31981	-0.412216	-3.85055	0.00656383525427474	0.147650813030618	-2.0828	Endothelial_cells__PNRC2	PNRC2	Endothelial_cells
1.35240096668621	-0.14174	3.84062313572392	0.00664751797293902	0.149130167355179	-2.09545	Endothelial_cells__LPCAT2	LPCAT2	Endothelial_cells
2.52498554042482	0.47488259716851	3.82990487843867	0.00673918941725189	0.150780305160719	-2.10912	Endothelial_cells__FXYD5	FXYD5	Endothelial_cells
2.1919487075093	2.75610433435873	3.82560591861059	0.00677634492765057	0.151205144323956	-2.11461	Endothelial_cells__PITPNC1	PITPNC1	Endothelial_cells
-1.40873	-1.96535	-3.81838	0.00683931957816064	0.15220229104019	-2.12384	Endothelial_cells__PLGRKT	PLGRKT	Endothelial_cells
3.6473308312996	-5.87202	3.81298701432366	0.00688670718971926	0.152848170506756	-2.13073	Endothelial_cells__SH3PXD2B	SH3PXD2B	Endothelial_cells
1.30222093262504	1.52082387589017	3.80468925053958	0.00696034646808481	0.15374178985778	-2.14135	Endothelial_cells__JAG2	JAG2	Endothelial_cells
-1.37968	-0.788257	-3.80254	0.0069795589119957	0.15374178985778	-2.1441	Endothelial_cells__NUDT12	NUDT12	Endothelial_cells
2.27502094706618	-0.111843	3.80121	0.00699149212814008	0.15374178985778	-2.14581	Endothelial_cells__MLEC	MLEC	Endothelial_cells
1.30628452900282	0.837187449486399	3.80016516253198	0.00700085766623796	0.15374178985778	-2.14715	Endothelial_cells__GRWD1	GRWD1	Endothelial_cells
1.34912355640333	1.03249504389204	3.79493201032856	0.00704803953329308	0.154370613251575	-2.15385	Endothelial_cells__TGFB1	TGFB1	Endothelial_cells
1.7946501116503	-0.687078	3.79087856462196	0.00708482373019676	0.154621605774433	-2.15905	Endothelial_cells__MYO1D	MYO1D	Endothelial_cells
1.98878719423776	0.191753901522332	3.78957977507833	0.00709665425998241	0.154621605774433	-2.16072	Endothelial_cells__SRSF9	SRSF9	Endothelial_cells
-1.56439	1.04263271726526	-3.77862	0.0071973260614242	0.156405600024109	-2.17478	Endothelial_cells__GBE1	GBE1	Endothelial_cells
1.3225532940942	-1.66342	3.77266603519564	0.00725270370533379	0.157198575363263	-2.18244	Endothelial_cells__AMBRA1	AMBRA1	Endothelial_cells
1.42130881362547	1.91757366120062	3.76945571201236	0.00728274335327953	0.157284036621363	-2.18657	Endothelial_cells__TNFRSF10A	TNFRSF10A	Endothelial_cells
-1.45609	0.0635686156723388	-3.76821	0.00729444168398967	0.157284036621363	-2.18817	Endothelial_cells__ACYP1	ACYP1	Endothelial_cells
1.76302346965568	0.222315110513671	3.76544	0.00732050463870073	0.157438139813711	-2.19173	Endothelial_cells__CXXC5	CXXC5	Endothelial_cells
2.81781524261118	-1.47404	3.75841448154142	0.00738709883506947	0.158281502384829	-2.20077	Endothelial_cells__DEDD2	DEDD2	Endothelial_cells
-1.95366	1.19475721635748	-3.7573	0.0073977537459688	0.158281502384829	-2.20221	Endothelial_cells__PRICKLE1	PRICKLE1	Endothelial_cells
1.94483477603692	0.581219062523394	3.75122095617215	0.00745596463937786	0.159117932547544	-2.21004	Endothelial_cells__MGMT	MGMT	Endothelial_cells
-2.02308	-0.129942	-3.74808	0.00748627403893492	0.159356160680448	-2.21409	Endothelial_cells__SEMA3A	SEMA3A	Endothelial_cells
-1.36034	0.118526772828193	-3.74473	0.00751866563001678	0.159525897293702	-2.21841	Endothelial_cells__NUMB	NUMB	Endothelial_cells
-1.45526	0.853062350437025	-3.7433	0.00753258171770094	0.159525897293702	-2.22025	Endothelial_cells__CFLAR	CFLAR	Endothelial_cells
-1.48841	1.31943912619143	-3.74065	0.00755847222539954	0.159667929776651	-2.22368	Endothelial_cells__NKTR	NKTR	Endothelial_cells
1.44295116694113	-1.10507	3.73857973156768	0.00757868471387212	0.159689602211538	-2.22635	Endothelial_cells__ANXA6	ANXA6	Endothelial_cells
1.88508442779876	-0.112881	3.73625553839276	0.0076014865127621	0.159765586479088	-2.22935	Endothelial_cells__IMPDH2	IMPDH2	Endothelial_cells
1.59814917849643	0.0335245452031804	3.72574567971687	0.00770553238461079	0.16046585518378	-2.24293	Endothelial_cells__AHSA1	AHSA1	Endothelial_cells
-1.66282	2.20156485452168	-3.72551	0.00770791351509305	0.16046585518378	-2.24324	Endothelial_cells__TNFSF10	TNFSF10	Endothelial_cells
-1.19453	0.648115345657964	-3.72306	0.00773236865131271	0.16046585518378	-2.2464	Endothelial_cells__DCBLD1	DCBLD1	Endothelial_cells
-3.48479	-2.4467	-3.72268	0.00773616985499733	0.16046585518378	-2.24689	Endothelial_cells__AR	AR	Endothelial_cells
1.55176207419202	2.60932571490457	3.71456105813802	0.00781796526159795	0.16046585518378	-2.2574	Endothelial_cells__SLC16A3	SLC16A3	Endothelial_cells
1.48564339743815	-0.21865	3.71353706245776	0.0078283478805516	0.16046585518378	-2.25872	Endothelial_cells__SMIM10L1	SMIM10L1	Endothelial_cells
-2.13648	-2.95998	-3.71343	0.00782943653955014	0.16046585518378	-2.25886	Endothelial_cells__STON2	STON2	Endothelial_cells
-2.62531	-1.93759	-3.71226	0.00784127850503456	0.16046585518378	-2.26037	Endothelial_cells__FAS	FAS	Endothelial_cells
2.19657068968212	-2.89747	3.70880228058338	0.00787655100316649	0.16046585518378	-2.26486	Endothelial_cells__EIF4E2	EIF4E2	Endothelial_cells
1.47502077136515	0.515261199581644	3.70407212430314	0.0079250299908741	0.16046585518378	-2.27099	Endothelial_cells__SH3GL1	SH3GL1	Endothelial_cells
-1.32324	0.36571272950405	-3.70398	0.00792595932233824	0.16046585518378	-2.2711	Endothelial_cells__ALS2CL	ALS2CL	Endothelial_cells
-1.22977	-0.910055	-3.70257	0.0079404974280617	0.16046585518378	-2.27293	Endothelial_cells__MED30	MED30	Endothelial_cells
1.83589264654934	-3.91991	3.70190705086982	0.00794732797104528	0.16046585518378	-2.27379	Endothelial_cells__QPCT	QPCT	Endothelial_cells
-2.00428	-0.278047	-3.70101	0.00795662801870754	0.16046585518378	-2.27496	Endothelial_cells__LCAT	LCAT	Endothelial_cells
1.31324766109165	1.06060688202292	3.6980640940988	0.00798707481380365	0.16046585518378	-2.27878	Endothelial_cells__ELMO1	ELMO1	Endothelial_cells
-1.45874	-0.422197	-3.69659	0.00800241604505975	0.16046585518378	-2.28069	Endothelial_cells__ST5	ST5	Endothelial_cells
-2.1597	-0.931221	-3.69651	0.00800322494547147	0.16046585518378	-2.2808	Endothelial_cells__KDM7A	KDM7A	Endothelial_cells
1.60034794867791	-0.619724	3.69580556835257	0.0080105351838757	0.16046585518378	-2.28171	Endothelial_cells__SYNGAP1	SYNGAP1	Endothelial_cells
-1.885	1.15269237022281	-3.69503	0.00801856377607186	0.16046585518378	-2.28271	Endothelial_cells__TTC1	TTC1	Endothelial_cells
1.30371105486543	0.0548833221425942	3.69373077733193	0.00803215314371904	0.16046585518378	-2.2844	Endothelial_cells__ANKH	ANKH	Endothelial_cells
1.47216070577976	0.17532374163935	3.69122274668387	0.00805837000638105	0.16046585518378	-2.28766	Endothelial_cells__ADA	ADA	Endothelial_cells
1.47584072197633	-1.77384	3.69116636845702	0.008058960406923	0.16046585518378	-2.28773	Endothelial_cells__G6PD	G6PD	Endothelial_cells
2.90198	-1.35407	3.68459735060113	0.00812807550835766	0.160713509664273	-2.29626	Endothelial_cells__RNF19B	RNF19B	Endothelial_cells
-2.17245	-0.991199	-3.68453	0.00812875322875003	0.160713509664273	-2.29634	Endothelial_cells__RCOR3	RCOR3	Endothelial_cells
-1.41651	1.18679830248935	-3.68448	0.00812932687356227	0.160713509664273	-2.29641	Endothelial_cells__APOL3	APOL3	Endothelial_cells
2.06528975840888	0.857342934915223	3.67349016071657	0.00824641055576141	0.162641884018015	-2.3107	Endothelial_cells__ZNF436	ZNF436	Endothelial_cells
2.0291312370572	0.675271999461344	3.66969390243248	0.00828728438518928	0.163061626330805	-2.31564	Endothelial_cells__SLC39A14	SLC39A14	Endothelial_cells
-1.53175	-0.182451	-3.66148	0.00837647804193743	0.164427893261899	-2.32634	Endothelial_cells__MRAS	MRAS	Endothelial_cells
-1.41253	-0.464024	-3.65561	0.00844086044765431	0.16530183883724	-2.33399	Endothelial_cells__DAZAP2	DAZAP2	Endothelial_cells
-1.22781	1.49211644908262	-3.65303	0.00846929042333998	0.165469258670091	-2.33735	Endothelial_cells__SORBS1	SORBS1	Endothelial_cells
1.26593164393075	-0.141342	3.64514794576934	0.00855694609400795	0.166485072563515	-2.34764	Endothelial_cells__AHCTF1	AHCTF1	Endothelial_cells
-3.66496	-2.50944	-3.64476	0.00856128932562593	0.166485072563515	-2.34814	Endothelial_cells__SCN9A	SCN9A	Endothelial_cells
-1.32557	0.248913128887195	-3.63925	0.00862309820140671	0.166821089133071	-2.35533	Endothelial_cells__ASB8	ASB8	Endothelial_cells
-1.97418	-1.25382	-3.63621	0.00865744451032019	0.166821089133071	-2.3593	Endothelial_cells__DCK	DCK	Endothelial_cells
-1.19134	0.692993674912515	-3.63459	0.00867584809125594	0.166821089133071	-2.36143	Endothelial_cells__FOXN3	FOXN3	Endothelial_cells
2.00749886006932	1.04549281591744	3.63287218946659	0.00869537422911319	0.166821089133071	-2.36367	Endothelial_cells__BZW2	BZW2	Endothelial_cells
3.86264437885687	-5.19837	3.63188707417477	0.00870658798106014	0.166821089133071	-2.36496	Endothelial_cells__TRAF3	TRAF3	Endothelial_cells
1.16601562866699	0.467892588842184	3.63098229719999	0.00871690107596856	0.166821089133071	-2.36614	Endothelial_cells__LYRM1	LYRM1	Endothelial_cells
-1.48185	0.182631648254297	-3.62918	0.00873750201045074	0.166821089133071	-2.3685	Endothelial_cells__CASZ1	CASZ1	Endothelial_cells
-1.38517	3.37966579281022	-3.62726	0.0087594882866454	0.166821089133071	-2.37101	Endothelial_cells__PTPRM	PTPRM	Endothelial_cells
-1.28683	0.0184925951951134	-3.62691	0.00876351012330729	0.166821089133071	-2.37147	Endothelial_cells__LYSMD4	LYSMD4	Endothelial_cells
1.69034536267597	-1.80977	3.62555857114142	0.00877900240781989	0.166821089133071	-2.37324	Endothelial_cells__PHPT1	PHPT1	Endothelial_cells
-1.95752	-0.942816	-3.6231	0.00880726519505403	0.166976920770922	-2.37645	Endothelial_cells__VASN	VASN	Endothelial_cells
1.52316857263377	-3.21359	3.61869279357481	0.00885830562122207	0.16753744998167	-2.38222	Endothelial_cells__TRABD	TRABD	Endothelial_cells
1.6025364648409	-1.17294	3.6164978940441	0.00888382175741705	0.16753744998167	-2.3851	Endothelial_cells__IPMK	IPMK	Endothelial_cells
-1.82608	2.97133548664444	-3.61359	0.00891780510758173	0.16753744998167	-2.38891	Endothelial_cells__PCDH12	PCDH12	Endothelial_cells
-2.29689	-1.74523	-3.61287	0.00892617366916748	0.16753744998167	-2.38985	Endothelial_cells__L3MBTL4	L3MBTL4	Endothelial_cells
-2.57101	2.13879603955868	-3.60491	0.00901982363713389	0.16753744998167	-2.40028	Endothelial_cells__ESM1	ESM1	Endothelial_cells
-1.36467	-1.38457	-3.60264	0.00904676932380026	0.16753744998167	-2.40326	Endothelial_cells__FBXO7	FBXO7	Endothelial_cells
1.36172878141487	-2.23535	3.60123543327663	0.00906347425812255	0.16753744998167	-2.40511	Endothelial_cells__KRT8	KRT8	Endothelial_cells
-1.18574	1.3873791022788	-3.59968	0.00908194770903942	0.16753744998167	-2.40714	Endothelial_cells__ADIPOR2	ADIPOR2	Endothelial_cells
1.6966185189322	-0.914186	3.59926095905317	0.00908700234479302	0.16753744998167	-2.4077	Endothelial_cells__CARD19	CARD19	Endothelial_cells
-1.32794	-0.452829	-3.5976	0.00910689753877322	0.16753744998167	-2.40988	Endothelial_cells__TUBE1	TUBE1	Endothelial_cells
2.66790379282385	1.96619962613985	3.59742208990867	0.00910897420507638	0.16753744998167	-2.41011	Endothelial_cells__ARPC5L	ARPC5L	Endothelial_cells
1.36872788769454	-2.05082	3.5972063189305	0.00911155613972183	0.16753744998167	-2.41039	Endothelial_cells__SGMS2	SGMS2	Endothelial_cells
-1.21753	0.0184271563732886	-3.59613	0.00912442322677157	0.16753744998167	-2.4118	Endothelial_cells__UVSSA	UVSSA	Endothelial_cells
1.64367230441685	0.8241637225622	3.59587326411027	0.00912752522407772	0.16753744998167	-2.41214	Endothelial_cells__GPR68	GPR68	Endothelial_cells
1.89373983735234	-0.130629	3.59493590412259	0.00913877235271873	0.16753744998167	-2.41337	Endothelial_cells__DGAT1	DGAT1	Endothelial_cells
1.32894009445378	1.68664870508067	3.59072798291437	0.00918944779600138	0.168096206606856	-2.4189	Endothelial_cells__GRB10	GRB10	Endothelial_cells
-1.32068	-0.152163	-3.58702	0.00923436785258157	0.168547464116308	-2.42377	Endothelial_cells__CCDC82	CCDC82	Endothelial_cells
1.19039402072949	1.24048458007547	3.58081727433413	0.00931001069231913	0.168740863513354	-2.43193	Endothelial_cells__HNRNPD	HNRNPD	Endothelial_cells
1.54247447715242	0.431002792749944	3.57982861296775	0.00932213152979722	0.168740863513354	-2.43323	Endothelial_cells__ECD	ECD	Endothelial_cells
-3.08261	0.358919441542342	-3.57766	0.00934873621703141	0.168740863513354	-2.43608	Endothelial_cells__DISP1	DISP1	Endothelial_cells
1.83831918808198	-1.69783	3.57694189884232	0.00935762032548279	0.168740863513354	-2.43702	Endothelial_cells__TXNDC17	TXNDC17	Endothelial_cells
1.4867069278472	-0.215392	3.57575721095283	0.00937222709963096	0.168740863513354	-2.43858	Endothelial_cells__EPHX2	EPHX2	Endothelial_cells
1.53897940737134	1.19167325874176	3.57533000960427	0.00937750040693934	0.168740863513354	-2.43915	Endothelial_cells__KLF16	KLF16	Endothelial_cells
1.80439654184942	1.11754819968267	3.57457062283673	0.0093868821106191	0.168740863513354	-2.44014	Endothelial_cells__CISD1	CISD1	Endothelial_cells
-1.23751	-0.931093	-3.57253	0.00941209746618197	0.168829498299639	-2.44283	Endothelial_cells__PYM1	PYM1	Endothelial_cells
-1.86478	-0.513414	-3.56462	0.00951080887356786	0.16936114177021	-2.45325	Endothelial_cells__ANKRD44	ANKRD44	Endothelial_cells
1.31853367176045	-1.5362	3.56186040276251	0.00954542948404758	0.16936114177021	-2.45688	Endothelial_cells__TP53I11	TP53I11	Endothelial_cells
-1.90471	-0.632036	-3.5593	0.00957767376428844	0.16936114177021	-2.46025	Endothelial_cells__VPS4B	VPS4B	Endothelial_cells
1.62982378357735	-1.6083	3.55831889299825	0.0095901221550979	0.16936114177021	-2.46155	Endothelial_cells__TCFL5	TCFL5	Endothelial_cells
3.2911259508964	28.1070262959619	3.5581215222819	0.00959261957669759	0.16936114177021	-2.46181	Endothelial_cells__CYBA	CYBA	Endothelial_cells
1.36956625691554	2.45942538974299	3.55752702957308	0.00960014622749668	0.16936114177021	-2.4626	Endothelial_cells__TFRC	TFRC	Endothelial_cells
1.21887730024743	-1.70583	3.55492155072506	0.0096332088678019	0.16936114177021	-2.46603	Endothelial_cells__IGFBP6	IGFBP6	Endothelial_cells
1.25277870082153	-0.216253	3.55486386092749	0.00963394232790576	0.16936114177021	-2.46611	Endothelial_cells__URB1	URB1	Endothelial_cells
-3.80609	3.11466267380888	-3.55469	0.00963611853166439	0.16936114177021	-2.46633	Endothelial_cells__GADD45B	GADD45B	Endothelial_cells
1.97484680867197	-1.95675	3.55309287266504	0.00965648792437619	0.16936114177021	-2.46844	Endothelial_cells__FBXO32	FBXO32	Endothelial_cells
2.11281496621415	-0.313514	3.55176650579872	0.00967341073781321	0.16936114177021	-2.47019	Endothelial_cells__CDA	CDA	Endothelial_cells
-1.32118	-0.311222	-3.55011	0.00969464915360051	0.16936114177021	-2.47239	Endothelial_cells__MVB12B	MVB12B	Endothelial_cells
-1.32757	-0.0530877	-3.5492	0.00970626752665989	0.16936114177021	-2.47358	Endothelial_cells__EIF2AK2	EIF2AK2	Endothelial_cells
-1.51354	-0.40244	-3.54368	0.00977726087819419	0.169462826333027	-2.48087	Endothelial_cells__TRMT1L	TRMT1L	Endothelial_cells
1.30643381553499	-0.444145	3.54358472993405	0.00977851388528782	0.169462826333027	-2.48099	Endothelial_cells__GPS2	GPS2	Endothelial_cells
-1.97227	0.510580893178102	-3.54084	0.00981407814057709	0.169462826333027	-2.48462	Endothelial_cells__ARRDC2	ARRDC2	Endothelial_cells
1.22225055674591	-0.0789686	3.54045814817152	0.00981900443696958	0.169462826333027	-2.48512	Endothelial_cells__BHLHE40	BHLHE40	Endothelial_cells
-1.90275	-2.42865	-3.54005	0.0098242768539306	0.169462826333027	-2.48566	Endothelial_cells__ARMT1	ARMT1	Endothelial_cells
-2.14198	-0.923271	-3.53842	0.00984552451285213	0.169462826333027	-2.48782	Endothelial_cells__SERPINB1	SERPINB1	Endothelial_cells
1.31627215849535	1.50190156972922	3.5377194825333	0.00985462068306923	0.169462826333027	-2.48874	Endothelial_cells__ATP8B1	ATP8B1	Endothelial_cells
1.56588927362346	0.887913378166722	3.53027691562826	0.00995212038873188	0.17041859353062	-2.49858	Endothelial_cells__LOXL2	LOXL2	Endothelial_cells
-1.14741	-0.0490874	-3.52827	0.00997855699235061	0.17041859353062	-2.50123	Endothelial_cells__TRIM4	TRIM4	Endothelial_cells
-1.18694	0.962363013319533	-3.52803	0.00998181683651637	0.17041859353062	-2.50156	Endothelial_cells__SMPD1	SMPD1	Endothelial_cells
1.52118908004297	-1.42248	3.52600699751003	0.0100085291457746	0.17041859353062	-2.50423	Endothelial_cells__PRPS2	PRPS2	Endothelial_cells
-1.66887	1.03370179553471	-3.5257	0.0100125786659225	0.17041859353062	-2.50464	Endothelial_cells__AMMECR1	AMMECR1	Endothelial_cells
2.13985590347521	-0.231117	3.51781444020184	0.0101177314505541	0.171786962143956	-2.51508	Endothelial_cells__ROBO1	ROBO1	Endothelial_cells
-1.84149	0.433025036947825	-3.51658	0.0101342542848351	0.171786962143956	-2.51671	Endothelial_cells__CTSO	CTSO	Endothelial_cells
1.73111951371372	0.78246282562336	3.51473506691477	0.010159111072214	0.171819901079068	-2.51916	Endothelial_cells__FBL	FBL	Endothelial_cells
-1.7974	0.286417490531632	-3.51337	0.0101774854297706	0.171819901079068	-2.52096	Endothelial_cells__CPAMD8	CPAMD8	Endothelial_cells
-1.16732	0.96437491069633	-3.51114	0.0102076954732237	0.171932159374688	-2.52392	Endothelial_cells__TMEM50B	TMEM50B	Endothelial_cells
-1.60357	-1.49816	-3.50983	0.010225449824639	0.171932159374688	-2.52566	Endothelial_cells__AKAP7	AKAP7	Endothelial_cells
1.55852546008878	-0.157663	3.50576385980095	0.0102807119016496	0.172243054405884	-2.53105	Endothelial_cells__WDR74	WDR74	Endothelial_cells
1.38932262299876	0.367446849890491	3.50171416175788	0.0103361194796131	0.172243054405884	-2.53642	Endothelial_cells__TFB2M	TFB2M	Endothelial_cells
1.61845410996446	-2.21256	3.50151622778145	0.0103388358703373	0.172243054405884	-2.53668	Endothelial_cells__KRT18	KRT18	Endothelial_cells
-1.593	-0.136097	-3.50135	0.0103410893194765	0.172243054405884	-2.5369	Endothelial_cells__LPCAT3	LPCAT3	Endothelial_cells
-1.1465	-0.262173	-3.50089	0.0103474140577847	0.172243054405884	-2.53751	Endothelial_cells__KIF20B	KIF20B	Endothelial_cells
3.14128844018952	-1.8261	3.49837436997865	0.0103820575428407	0.172474780297531	-2.54085	Endothelial_cells__EIF3H	EIF3H	Endothelial_cells
1.74263891315835	0.392906187003547	3.4966995352156	0.0104051777045866	0.172514529950745	-2.54307	Endothelial_cells__SLC27A5	SLC27A5	Endothelial_cells
1.32381396548002	-0.344631	3.49472689838391	0.0104324803855858	0.172623328527297	-2.54569	Endothelial_cells__MYOF	MYOF	Endothelial_cells
2.61093721248145	-4.10112	3.49199354809001	0.0104704401629976	0.172907685469503	-2.54932	Endothelial_cells__CD24	CD24	Endothelial_cells
1.62042117720106	1.42234232802906	3.48939429820771	0.0105066763518679	0.173162509458606	-2.55278	Endothelial_cells__ENTPD1	ENTPD1	Endothelial_cells
1.69789695346906	-1.68468	3.48372582371897	0.0105861724108756	0.1733955316252	-2.56031	Endothelial_cells__TCEA3	TCEA3	Endothelial_cells
1.87371106644446	-1.0689	3.48207949263143	0.0106093827898511	0.1733955316252	-2.5625	Endothelial_cells__APRT	APRT	Endothelial_cells
1.15334007456657	0.612907294868473	3.48168672472269	0.0106149282622346	0.1733955316252	-2.56302	Endothelial_cells__SOX4	SOX4	Endothelial_cells
-1.35578	-2.99318	-3.48153	0.0106170829562548	0.1733955316252	-2.56322	Endothelial_cells__MPC1	MPC1	Endothelial_cells
2.06101555068947	3.71089920803656	3.48097525138772	0.0106249815125378	0.1733955316252	-2.56397	Endothelial_cells__MARCKSL1	MARCKSL1	Endothelial_cells
1.98905294384258	-0.448934	3.47636576161121	0.010690364635125	0.174121144536488	-2.5701	Endothelial_cells__CLCF1	CLCF1	Endothelial_cells
1.54133191887656	0.566526260026206	3.46826335391643	0.0108063506653909	0.175666516773533	-2.58088	Endothelial_cells__FADS3	FADS3	Endothelial_cells
4.74913394397632	0.695246863463169	3.4641150209752	0.0108662604736451	0.176296073922316	-2.58641	Endothelial_cells__DNAJC2	DNAJC2	Endothelial_cells
-1.55729	0.954929406338285	-3.46057	0.0109177624761858	0.17644975281537	-2.59113	Endothelial_cells__TECPR1	TECPR1	Endothelial_cells
-1.60792	-1.63214	-3.46054	0.0109181332091693	0.17644975281537	-2.59116	Endothelial_cells__AMIGO2	AMIGO2	Endothelial_cells
4.11322019294026	-1.45734	3.45395247315443	0.0110145505888784	0.177446531945189	-2.59995	Endothelial_cells__EIF3L	EIF3L	Endothelial_cells
-1.25985	-1.42579	-3.45249	0.0110360735552917	0.177446531945189	-2.6019	Endothelial_cells__ATP6AP2	ATP6AP2	Endothelial_cells
2.43987620841516	1.34246094899305	3.45196743030716	0.0110437707013827	0.177446531945189	-2.6026	Endothelial_cells__NOP16	NOP16	Endothelial_cells
-1.42165	-0.601337	-3.44585	0.011134416009756	0.17845605281635	-2.61077	Endothelial_cells__GIN1	GIN1	Endothelial_cells
1.3506141396433	-1.74374	3.44483310008508	0.0111494830547281	0.17845605281635	-2.61212	Endothelial_cells__CELSR1	CELSR1	Endothelial_cells
1.69253978767751	0.230036967467049	3.43572888719684	0.0112859756403786	0.179481794440368	-2.62428	Endothelial_cells__NTMT1	NTMT1	Endothelial_cells
1.26000854886083	0.128391302960863	3.43370982480947	0.0113164899587964	0.179481794440368	-2.62698	Endothelial_cells__CALHM2	CALHM2	Endothelial_cells
1.17228719210404	1.61851987048788	3.43161573738018	0.011348232363116	0.179481794440368	-2.62977	Endothelial_cells__MATN2	MATN2	Endothelial_cells
1.28313708804235	-0.290492	3.43132713527713	0.0113526145643539	0.179481794440368	-2.63016	Endothelial_cells__LTBP3	LTBP3	Endothelial_cells
1.28077238903598	0.68592661680413	3.43106480026777	0.0113565995066833	0.179481794440368	-2.63051	Endothelial_cells__EIF2B4	EIF2B4	Endothelial_cells
-2.10299	-2.94202	-3.4278	0.0114063911814201	0.179481794440368	-2.63488	Endothelial_cells__B4GALT4	B4GALT4	Endothelial_cells
1.6098887845745	-1.52686	3.42534911272633	0.0114437987195572	0.179481794440368	-2.63815	Endothelial_cells__ANP32B	ANP32B	Endothelial_cells
-1.46587	-0.881693	-3.42492	0.0114503772004269	0.179481794440368	-2.63873	Endothelial_cells__RILPL2	RILPL2	Endothelial_cells
1.78362798777125	1.35463637840653	3.42337080476894	0.0114741483395067	0.179481794440368	-2.6408	Endothelial_cells__GAR1	GAR1	Endothelial_cells
2.44174047468439	1.87547738005246	3.42245752586699	0.0114881884651428	0.179481794440368	-2.64202	Endothelial_cells__IGFBP7	IGFBP7	Endothelial_cells
2.28420087344326	0.245575105563594	3.42081346576196	0.0115135099257907	0.179481794440368	-2.64422	Endothelial_cells__METTL1	METTL1	Endothelial_cells
-1.20532	1.41238891373318	-3.42012	0.0115242145165743	0.179481794440368	-2.64515	Endothelial_cells__KLF9	KLF9	Endothelial_cells
1.12650528796043	0.648281106272811	3.41836504225901	0.0115513318484371	0.179481794440368	-2.6475	Endothelial_cells__RALBP1	RALBP1	Endothelial_cells
2.21920880163577	-0.179384	3.41731330529171	0.0115676197045695	0.179481794440368	-2.64891	Endothelial_cells__RRP12	RRP12	Endothelial_cells
1.34831525663781	-0.359291	3.41723511126902	0.0115688316565354	0.179481794440368	-2.64901	Endothelial_cells__TPBG	TPBG	Endothelial_cells
1.7221524249018	-0.651006	3.41548724099271	0.0115959582394675	0.179481794440368	-2.65135	Endothelial_cells__IER5L	IER5L	Endothelial_cells
1.18893649262894	2.13709689972272	3.41529932746408	0.0115988787062327	0.179481794440368	-2.6516	Endothelial_cells__AFAP1	AFAP1	Endothelial_cells
1.12344905918097	-2.10328	3.41257523188574	0.0116413047203702	0.179481794440368	-2.65525	Endothelial_cells__SMCO4	SMCO4	Endothelial_cells
1.55025237504414	-2.33507	3.40959515520405	0.0116879095324476	0.179481794440368	-2.65924	Endothelial_cells__TMEM147	TMEM147	Endothelial_cells
-1.7729	-0.625732	-3.40894	0.0116981512097874	0.179481794440368	-2.66012	Endothelial_cells__ARHGAP18	ARHGAP18	Endothelial_cells
1.69550849561638	0.719845821531291	3.40781377034553	0.011715864444844	0.179481794440368	-2.66163	Endothelial_cells__TMA16	TMA16	Endothelial_cells
1.41663743735297	-0.289128	3.40713514905852	0.0117265328973113	0.179481794440368	-2.66254	Endothelial_cells__NELFCD	NELFCD	Endothelial_cells
1.60976829793084	-0.359385	3.40616279308298	0.0117418373756624	0.179481794440368	-2.66384	Endothelial_cells__TGFB3	TGFB3	Endothelial_cells
1.20056257261562	0.263230843755848	3.4060532505748	0.0117435628805385	0.179481794440368	-2.66399	Endothelial_cells__LTV1	LTV1	Endothelial_cells
1.47583469351774	-0.82207	3.40547457463809	0.0117526826829269	0.179481794440368	-2.66477	Endothelial_cells__FHL2	FHL2	Endothelial_cells
1.18837729764009	-0.364148	3.40091257598553	0.0118248471105439	0.180253118133804	-2.67088	Endothelial_cells__LAGE3	LAGE3	Endothelial_cells
1.28566769556673	-0.521421	3.39849091912513	0.0118633485977276	0.180509415683523	-2.67413	Endothelial_cells__NR4A2	NR4A2	Endothelial_cells
2.15352050081669	1.55386991726873	3.39444541549602	0.011927969555239	0.181119967358171	-2.67956	Endothelial_cells__SNRPD1	SNRPD1	Endothelial_cells
-1.37113	-0.806536	-3.39326	0.0119469977267375	0.181119967358171	-2.68115	Endothelial_cells__KBTBD3	KBTBD3	Endothelial_cells
-1.57306	-0.400172	-3.38689	0.0120496732677248	0.181854318119959	-2.6897	Endothelial_cells__NEIL2	NEIL2	Endothelial_cells
-4.16927	0.139451421994755	-3.3863	0.0120591559505569	0.181854318119959	-2.69049	Endothelial_cells__TXNIP	TXNIP	Endothelial_cells
-1.87892	-1.74097	-3.38619	0.0120609856544776	0.181854318119959	-2.69064	Endothelial_cells__PLAU	PLAU	Endothelial_cells
-1.63436	-1.92616	-3.38314	0.0121106310155045	0.182136004902066	-2.69474	Endothelial_cells__GDAP2	GDAP2	Endothelial_cells
1.44216451584511	-0.993688	3.38055479934661	0.0121527596508539	0.182136004902066	-2.69821	Endothelial_cells__HIST1H2AC	HIST1H2AC	Endothelial_cells
-1.12095	-0.345302	-3.37943	0.0121712084055435	0.182136004902066	-2.69973	Endothelial_cells__WDR20	WDR20	Endothelial_cells
2.89407362222725	-0.163625	3.37936402891294	0.0121722413957091	0.182136004902066	-2.69981	Endothelial_cells__BCL7C	BCL7C	Endothelial_cells
-3.49945	-4.35349	-3.37834	0.0121890850330951	0.182136004902066	-2.70119	Endothelial_cells__CBR1	CBR1	Endothelial_cells
-1.16604	-0.31629	-3.37678	0.0122145985162505	0.182177065311282	-2.70328	Endothelial_cells__HDAC11	HDAC11	Endothelial_cells
1.47282589583823	-1.03573	3.37550498219804	0.0122356096971052	0.182177065311282	-2.705	Endothelial_cells__AMD1	AMD1	Endothelial_cells
1.12308949836136	-0.0734494	3.37239079925097	0.01228700629425	0.182599988200825	-2.70919	Endothelial_cells__ADAT2	ADAT2	Endothelial_cells
-1.51066	0.697993594141301	-3.36941	0.0123363666415349	0.182599988200825	-2.71319	Endothelial_cells__MYLIP	MYLIP	Endothelial_cells
2.5894010860346	-0.848129	3.36876053813211	0.0123472144161065	0.182599988200825	-2.71407	Endothelial_cells__NPM3	NPM3	Endothelial_cells
-1.51287	1.84888910686315	-3.36758	0.0123669095597669	0.182599988200825	-2.71566	Endothelial_cells__ITGA1	ITGA1	Endothelial_cells
-2.13584	0.216751052265541	-3.36717	0.012373710602579	0.182599988200825	-2.71621	Endothelial_cells__NDFIP1	NDFIP1	Endothelial_cells
2.97115991998224	3.42731072714426	3.36464792051843	0.0124158071372018	0.182896925314922	-2.71961	Endothelial_cells__HMOX1	HMOX1	Endothelial_cells
-1.58741	-0.262964	-3.35886	0.0125130163459565	0.184003242133209	-2.7274	Endothelial_cells__TXNRD1	TXNRD1	Endothelial_cells
3.90663070715969	-2.16808	3.35362712280728	0.0126016528133514	0.184688538733818	-2.73445	Endothelial_cells__ASPH	ASPH	Endothelial_cells
1.76636907443943	-0.0939383	3.35348906987753	0.0126039997597992	0.184688538733818	-2.73463	Endothelial_cells__POLR1C	POLR1C	Endothelial_cells
-1.09671	-2.03169	-3.3496	0.0126703610758979	0.185334648918627	-2.73988	Endothelial_cells__RXRA	RXRA	Endothelial_cells
1.34137535843276	-0.545985	3.34537158371555	0.0127428315932985	0.186067697107059	-2.74558	Endothelial_cells__NSMF	NSMF	Endothelial_cells
1.23905741547383	1.70298901750767	3.34345898758297	0.0127757817183787	0.1861574268757	-2.74816	Endothelial_cells__RAI14	RAI14	Endothelial_cells
1.17789534507171	0.159590980539063	3.34242057010527	0.0127937099811247	0.1861574268757	-2.74956	Endothelial_cells__DGKA	DGKA	Endothelial_cells
-1.25481	-1.0543	-3.34032	0.0128301279979767	0.186361527621571	-2.7524	Endothelial_cells__ZNF652	ZNF652	Endothelial_cells
1.7251409216435	-0.133504	3.33731643837622	0.0128822277539369	0.186597552204456	-2.75644	Endothelial_cells__FKBP4	FKBP4	Endothelial_cells
1.38690895831314	1.08073862496267	3.33612673496238	0.0129029547306039	0.186597552204456	-2.75805	Endothelial_cells__ISYNA1	ISYNA1	Endothelial_cells
1.34904235840689	7.37569836654715	3.33551446295042	0.0129136357166607	0.186597552204456	-2.75888	Endothelial_cells__CD81	CD81	Endothelial_cells
1.51588252969497	-0.780197	3.33024499648762	0.013005955457458	0.187425257453422	-2.76599	Endothelial_cells__SLC2A1	SLC2A1	Endothelial_cells
-1.38838	0.747763685534853	-3.32968	0.0130159556419654	0.187425257453422	-2.76676	Endothelial_cells__SH3D19	SH3D19	Endothelial_cells
1.12334494224332	-1.43333	3.32459536955946	0.0131057258481483	0.188110550418868	-2.77362	Endothelial_cells__GPR160	GPR160	Endothelial_cells
1.23362053348646	-1.26391	3.32375525067071	0.013120632317484	0.188110550418868	-2.77476	Endothelial_cells__MMP14	MMP14	Endothelial_cells
-1.18102	0.0572305363420458	-3.32315	0.0131313504497612	0.188110550418868	-2.77557	Endothelial_cells__PGBD1	PGBD1	Endothelial_cells
-1.81105	-1.32473	-3.32096	0.0131703621921397	0.188345231142918	-2.77854	Endothelial_cells__VAMP7	VAMP7	Endothelial_cells
1.47409542680085	-2.08092	3.31388201880916	0.0132971905940008	0.189038852493085	-2.78811	Endothelial_cells__SPG21	SPG21	Endothelial_cells
2.29419580423019	1.88385889807278	3.31383692610036	0.0132980028098377	0.189038852493085	-2.78817	Endothelial_cells__CDH24	CDH24	Endothelial_cells
1.56064673489539	-0.436518	3.31289420500852	0.0133149954635299	0.189038852493085	-2.78944	Endothelial_cells__LLPH	LLPH	Endothelial_cells
3.43117	2.68760558241553	3.31209	0.0133294625082324	0.189038852493085	-2.79053	Endothelial_cells__CRIP1	CRIP1	Endothelial_cells
1.78709924407939	-2.32716	3.31192837071306	0.01333242898155	0.189038852493085	-2.79075	Endothelial_cells__ALKBH7	ALKBH7	Endothelial_cells
-3.17809	-0.661113	-3.30909	0.0133837922186515	0.189050566585725	-2.79459	Endothelial_cells__LTK	LTK	Endothelial_cells
-1.89252	1.29191697838672	-3.30878	0.0133894094896452	0.189050566585725	-2.79501	Endothelial_cells__TCN2	TCN2	Endothelial_cells
1.23846502761515	-1.43532	3.30734056677428	0.0134155760815761	0.189050566585725	-2.79696	Endothelial_cells__C12ORF73	C12ORF73	Endothelial_cells
-1.11344	-0.242755	-3.30652	0.0134305069446504	0.189050566585725	-2.79807	Endothelial_cells__CDK14	CDK14	Endothelial_cells
1.61969195850709	0.279680237513725	3.30451036432584	0.0134671475275171	0.189050566585725	-2.80079	Endothelial_cells__SMAD3	SMAD3	Endothelial_cells
1.79428905668822	0.943849598936891	3.30437932045446	0.0134695405485204	0.189050566585725	-2.80097	Endothelial_cells__NLGN2	NLGN2	Endothelial_cells
-1.30323	0.0418586740372176	-3.2948	0.013645748367175	0.18975912784787	-2.81395	Endothelial_cells__TUBD1	TUBD1	Endothelial_cells
1.48671306431636	2.08405098615393	3.29289076001507	0.013681124880113	0.18975912784787	-2.81653	Endothelial_cells__EVL	EVL	Endothelial_cells
1.37997413866063	0.412854361274007	3.29176651833155	0.0137020212823252	0.18975912784787	-2.81806	Endothelial_cells__AK4	AK4	Endothelial_cells
-1.31358	0.1664507932332	-3.29122	0.0137121274621758	0.18975912784787	-2.81879	Endothelial_cells__ZNF397	ZNF397	Endothelial_cells
1.14236323067778	-0.725954	3.29056744559228	0.0137243464243081	0.18975912784787	-2.81968	Endothelial_cells__ATAD3B	ATAD3B	Endothelial_cells
-1.68788	-1.68084	-3.28977	0.0137392076973409	0.18975912784787	-2.82076	Endothelial_cells__PTER	PTER	Endothelial_cells
1.08583290512006	5.62267006980674	3.28916584409444	0.0137504919975715	0.18975912784787	-2.82158	Endothelial_cells__COMT	COMT	Endothelial_cells
1.55480146174362	-1.12454	3.28912866909873	0.0137511861915669	0.18975912784787	-2.82163	Endothelial_cells__PBDC1	PBDC1	Endothelial_cells
-2.32512	-2.52711	-3.28686	0.0137936317650622	0.18975912784787	-2.82471	Endothelial_cells__RASGRP2	RASGRP2	Endothelial_cells
-1.39089	-1.8395	-3.28377	0.013851601903408	0.18975912784787	-2.8289	Endothelial_cells__ACER3	ACER3	Endothelial_cells
1.37475312244992	0.754374713015447	3.28325888989095	0.0138612709122564	0.18975912784787	-2.82959	Endothelial_cells__MEX3C	MEX3C	Endothelial_cells
-1.63849	-0.574592	-3.2809	0.0139058686520515	0.18975912784787	-2.8328	Endothelial_cells__PDZD2	PDZD2	Endothelial_cells
1.1930627199324	-0.0485832	3.28087651960783	0.0139062211482513	0.18975912784787	-2.83283	Endothelial_cells__SVIL	SVIL	Endothelial_cells
1.13907288227484	1.62262861874554	3.28049166496147	0.0139134972287008	0.18975912784787	-2.83335	Endothelial_cells__BRIX1	BRIX1	Endothelial_cells
-1.41361	0.441614126966347	-3.28007	0.0139214813131461	0.18975912784787	-2.83392	Endothelial_cells__SLC7A7	SLC7A7	Endothelial_cells
1.61637298931427	-1.85122	3.27929060723947	0.0139362308210563	0.18975912784787	-2.83498	Endothelial_cells__LIMS1	LIMS1	Endothelial_cells
1.28409414069797	-1.65202	3.27771580293328	0.0139660992214282	0.18975912784787	-2.83712	Endothelial_cells__PTPN2	PTPN2	Endothelial_cells
-1.33797	-0.624923	-3.27648	0.0139895955438736	0.18975912784787	-2.8388	Endothelial_cells__PARP14	PARP14	Endothelial_cells
-1.23015	2.06732432322421	-3.27618	0.0139952597138921	0.18975912784787	-2.8392	Endothelial_cells__ID3	ID3	Endothelial_cells
-1.48176	-0.279866	-3.27602	0.013998288852772	0.18975912784787	-2.83942	Endothelial_cells__PRRG4	PRRG4	Endothelial_cells
-1.26434	-1.98123	-3.276	0.0139988110655524	0.18975912784787	-2.83945	Endothelial_cells__MZT1	MZT1	Endothelial_cells
-1.38733	7.20919012509576	-3.27321	0.0140519858493507	0.19010213426867	-2.84324	Endothelial_cells__KLF4	KLF4	Endothelial_cells
1.38019925659627	1.25825608138927	3.2722763751602	0.0140697963125677	0.19010213426867	-2.8445	Endothelial_cells__SHC1	SHC1	Endothelial_cells
-1.49854	-0.955101	-3.27018	0.0141099552828797	0.190335750112492	-2.84735	Endothelial_cells__LMO7	LMO7	Endothelial_cells
2.34297536583772	19.7383431590809	3.26860094990777	0.0141403329725901	0.19043687917616	-2.8495	Endothelial_cells__LTA4H	LTA4H	Endothelial_cells
1.36371847257755	-1.13399	3.26467060075216	0.014216182789827	0.191149094280662	-2.85484	Endothelial_cells__CPNE1	CPNE1	Endothelial_cells
-1.6757	-1.5316	-3.26158	0.0142762239594779	0.191165578808803	-2.85904	Endothelial_cells__PCGF5	PCGF5	Endothelial_cells
2.47128822131633	-2.74433	3.26036869574946	0.014299704633844	0.191165578808803	-2.86068	Endothelial_cells__PDGFD	PDGFD	Endothelial_cells
1.17237585331229	-0.0983405	3.26023906320749	0.0143022296311949	0.191165578808803	-2.86086	Endothelial_cells__NET1	NET1	Endothelial_cells
-1.15545	-1.79434	-3.25988	0.0143092821816514	0.191165578808803	-2.86135	Endothelial_cells__SESN1	SESN1	Endothelial_cells
-1.15143	0.514557123379735	-3.25869	0.0143323549265287	0.191166971239581	-2.86296	Endothelial_cells__RAB5A	RAB5A	Endothelial_cells
-2.0113	0.142214358021715	-3.25711	0.0143633901671652	0.191274394178106	-2.86512	Endothelial_cells__FAM192A	FAM192A	Endothelial_cells
-1.10705	0.611429873641652	-3.25363	0.0144316005085326	0.191742593343956	-2.86985	Endothelial_cells__TULP3	TULP3	Endothelial_cells
2.22328696689125	0.747772477250931	3.25296810707023	0.01444462405703	0.191742593343956	-2.87075	Endothelial_cells__PAICS	PAICS	Endothelial_cells
2.06673756651467	-2.9281	3.25030309645546	0.0144971964581193	0.192134022485553	-2.87438	Endothelial_cells__NEK6	NEK6	Endothelial_cells
-1.32557	-0.107551	-3.24684	0.0145659150557112	0.192350117103611	-2.8791	Endothelial_cells__ZNF136	ZNF136	Endothelial_cells
-1.35936	1.39255201539337	-3.24388	0.0146246545853194	0.192350117103611	-2.88311	Endothelial_cells__PREX1	PREX1	Endothelial_cells
-2.75634	-1.00585	-3.24309	0.0146404945444203	0.192350117103611	-2.88419	Endothelial_cells__IFIT1	IFIT1	Endothelial_cells
-1.1332	-0.349507	-3.24218	0.0146586654811265	0.192350117103611	-2.88543	Endothelial_cells__MFSD11	MFSD11	Endothelial_cells
-1.21262	1.89373608248387	-3.24147	0.0146728863101116	0.192350117103611	-2.8864	Endothelial_cells__IL4R	IL4R	Endothelial_cells
-1.34701	0.307249171607351	-3.24051	0.0146921851176267	0.192350117103611	-2.88771	Endothelial_cells__CNOT8	CNOT8	Endothelial_cells
-1.54198	2.90613599211502	-3.23998	0.0147028614564406	0.192350117103611	-2.88844	Endothelial_cells__N4BP3	N4BP3	Endothelial_cells
2.0944302409919	-1.28631	3.23976518412367	0.014707098805407	0.192350117103611	-2.88872	Endothelial_cells__PPIA	PPIA	Endothelial_cells
1.29270173367328	0.0495820993809168	3.23809258010014	0.0147407141084648	0.192350117103611	-2.891	Endothelial_cells__GADD45GIP1	GADD45GIP1	Endothelial_cells
-1.11222	0.766204522643102	-3.23583	0.0147863536370743	0.192350117103611	-2.89409	Endothelial_cells__AAMDC	AAMDC	Endothelial_cells
-1.11329	1.11902100642445	-3.2335	0.0148333574182515	0.192350117103611	-2.89726	Endothelial_cells__ADD1	ADD1	Endothelial_cells
1.56369303731732	0.795762350962436	3.23301564730602	0.0148432544379509	0.192350117103611	-2.89792	Endothelial_cells__DKC1	DKC1	Endothelial_cells
-1.12759	-0.707881	-3.23147	0.0148745891393799	0.192350117103611	-2.90003	Endothelial_cells__PTPDC1	PTPDC1	Endothelial_cells
2.22946991078943	-3.73963	3.22955342548085	0.0149136210144915	0.192350117103611	-2.90264	Endothelial_cells__UQCRH	UQCRH	Endothelial_cells
1.64140904635248	3.51917377359839	3.22849724383158	0.0149351581844107	0.192350117103611	-2.90408	Endothelial_cells__LITAF	LITAF	Endothelial_cells
-1.39068	-0.979847	-3.22809	0.014943492259153	0.192350117103611	-2.90464	Endothelial_cells__FARP1	FARP1	Endothelial_cells
-1.20429	5.49107689840013	-3.22797	0.0149459745676056	0.192350117103611	-2.9048	Endothelial_cells__AKR1C3	AKR1C3	Endothelial_cells
1.64246245828296	-2.1171	3.22710793053815	0.0149635392774956	0.192350117103611	-2.90598	Endothelial_cells__KIF3C	KIF3C	Endothelial_cells
1.36843657874576	-0.783815	3.22635955576855	0.0149788511710293	0.192350117103611	-2.907	Endothelial_cells__KLHL21	KLHL21	Endothelial_cells
-1.22787	0.833692613654304	-3.22607	0.0149847423023229	0.192350117103611	-2.90739	Endothelial_cells__SLC30A4	SLC30A4	Endothelial_cells
-1.42306	0.407705530892557	-3.22254	0.0150572292865488	0.192350117103611	-2.9122	Endothelial_cells__MXD4	MXD4	Endothelial_cells
1.1212344894592	0.327387985335895	3.22224565399218	0.0150633232616188	0.192350117103611	-2.91261	Endothelial_cells__CCDC12	CCDC12	Endothelial_cells
1.29980093868525	-0.528325	3.22219990740568	0.0150642654605176	0.192350117103611	-2.91267	Endothelial_cells__ST6GALNAC1	ST6GALNAC1	Endothelial_cells
-2.2708	-1.64193	-3.21959	0.0151181019403714	0.192350117103611	-2.91623	Endothelial_cells__CA2	CA2	Endothelial_cells
1.47461895920639	-0.0928527	3.21919644508972	0.0151262635120699	0.192350117103611	-2.91677	Endothelial_cells__TES	TES	Endothelial_cells
-1.14933	-0.828167	-3.21771	0.0151570994158291	0.192350117103611	-2.9188	Endothelial_cells__ARFGAP2	ARFGAP2	Endothelial_cells
-1.1809	-0.955613	-3.21542	0.0152045561532959	0.192350117103611	-2.92192	Endothelial_cells__ORC4	ORC4	Endothelial_cells
1.24207434603079	3.67503312462141	3.21379429151259	0.0152384659829742	0.192350117103611	-2.92414	Endothelial_cells__LMNA	LMNA	Endothelial_cells
1.20821707242249	1.08609858983631	3.21085074381562	0.0152999788783033	0.192350117103611	-2.92816	Endothelial_cells__NOL7	NOL7	Endothelial_cells
-1.27292	2.34424919835346	-3.21071	0.0153029610174176	0.192350117103611	-2.92836	Endothelial_cells__FLYWCH2	FLYWCH2	Endothelial_cells
1.17712102520329	0.711556560541487	3.2102086692885	0.0153134320111727	0.192350117103611	-2.92904	Endothelial_cells__RRP36	RRP36	Endothelial_cells
-1.37223	-2.24424	-3.20992	0.015319417024915	0.192350117103611	-2.92943	Endothelial_cells__MCEE	MCEE	Endothelial_cells
2.05819936501944	1.56852183981227	3.20872470217655	0.0153445735640549	0.192350117103611	-2.93107	Endothelial_cells__SEMA6B	SEMA6B	Endothelial_cells
-1.25204	-1.01832	-3.20828	0.015353971001885	0.192350117103611	-2.93168	Endothelial_cells__KLHL12	KLHL12	Endothelial_cells
1.64997793286497	-2.36037	3.20793007235418	0.0153612770611265	0.192350117103611	-2.93215	Endothelial_cells__UBA52	UBA52	Endothelial_cells
1.29134412175183	-1.36578	3.20665503714589	0.0153881196748754	0.192350117103611	-2.9339	Endothelial_cells__C20ORF27	C20ORF27	Endothelial_cells
-1.31969	-1.02362	-3.20618	0.0153982268154697	0.192350117103611	-2.93455	Endothelial_cells__TAF12	TAF12	Endothelial_cells
1.38886862295468	-1.93771	3.20614927748612	0.0153987810863421	0.192350117103611	-2.93459	Endothelial_cells__KIF22	KIF22	Endothelial_cells
2.08972662758396	-1.33971	3.20538923182452	0.0154148177469793	0.192350117103611	-2.93562	Endothelial_cells__MYO5A	MYO5A	Endothelial_cells
-1.76948	-1.14841	-3.20369	0.0154508166329438	0.192510698856275	-2.93795	Endothelial_cells__FAM110A	FAM110A	Endothelial_cells
-1.22125	-0.430854	-3.20109	0.015505926542808	0.192908559963813	-2.9415	Endothelial_cells__TPCN1	TPCN1	Endothelial_cells
3.55629435211819	-0.750702	3.19413157090988	0.0156544588682345	0.194465762925844	-2.95102	Endothelial_cells__ENO1	ENO1	Endothelial_cells
-1.17019	0.0446995996183398	-3.19147	0.0157116080429247	0.194835233817054	-2.95465	Endothelial_cells__JADE1	JADE1	Endothelial_cells
-1.76055	1.07955538951723	-3.19057	0.0157310197194594	0.194835233817054	-2.95588	Endothelial_cells__EPB41L2	EPB41L2	Endothelial_cells
2.74685700397609	-0.107362	3.18755204246358	0.0157963637892402	0.19522172392368	-2.96002	Endothelial_cells__SMOX	SMOX	Endothelial_cells
-1.0244	1.74443364125191	-3.18696	0.0158091363600336	0.19522172392368	-2.96082	Endothelial_cells__EPAS1	EPAS1	Endothelial_cells
1.19468297045766	0.0822081347297762	3.1851334057099	0.0158488741308373	0.195232790142048	-2.96333	Endothelial_cells__PRPF31	PRPF31	Endothelial_cells
2.21604165855074	-1.00627	3.18362845813817	0.0158816420174828	0.195232790142048	-2.96539	Endothelial_cells__HSPA9	HSPA9	Endothelial_cells
-1.36191	-0.988584	-3.18129	0.0159327366662021	0.195232790142048	-2.96859	Endothelial_cells__GYG1	GYG1	Endothelial_cells
1.25744937945657	-1.66538	3.18067184769021	0.0159462292137522	0.195232790142048	-2.96944	Endothelial_cells__COLGALT1	COLGALT1	Endothelial_cells
1.245	-0.289238	3.17947142505868	0.0159725327482969	0.195232790142048	-2.97108	Endothelial_cells__DPAGT1	DPAGT1	Endothelial_cells
1.03225245332938	0.338209138523212	3.17818816803169	0.0160007027617295	0.195232790142048	-2.97284	Endothelial_cells__UBTD1	UBTD1	Endothelial_cells
2.13410318691842	-0.896868	3.17813520628311	0.0160018665193992	0.195232790142048	-2.97291	Endothelial_cells__IGHM	IGHM	Endothelial_cells
-2.4432	-1.82595	-3.17685	0.0160302209169773	0.195232790142048	-2.97468	Endothelial_cells__CYLD	CYLD	Endothelial_cells
-1.27462	-0.206401	-3.17502	0.0160705780804606	0.195232790142048	-2.97718	Endothelial_cells__LRRC57	LRRC57	Endothelial_cells
-1.44096	-2.47498	-3.17308	0.016113413948797	0.195232790142048	-2.97984	Endothelial_cells__ZDHHC7	ZDHHC7	Endothelial_cells
-1.55042	-1.26421	-3.17293	0.0161166090368364	0.195232790142048	-2.98004	Endothelial_cells__SASS6	SASS6	Endothelial_cells
-1.36057	-0.245477	-3.17242	0.0161280033005211	0.195232790142048	-2.98074	Endothelial_cells__ENC1	ENC1	Endothelial_cells
1.73224657647805	-0.176938	3.17202667904072	0.0161367028789216	0.195232790142048	-2.98128	Endothelial_cells__RHOU	RHOU	Endothelial_cells
1.06476542769324	0.751505906240343	3.17145832278863	0.0161493102190484	0.195232790142048	-2.98206	Endothelial_cells__MLKL	MLKL	Endothelial_cells
1.10767269206028	0.750327361558827	3.16990121721279	0.0161839041830731	0.195232790142048	-2.98419	Endothelial_cells__BIN3	BIN3	Endothelial_cells
1.83158753272856	-1.22415	3.16983644877738	0.0161853448513772	0.195232790142048	-2.98428	Endothelial_cells__GNGT2	GNGT2	Endothelial_cells
2.02172162456038	-0.735036	3.16424241227895	0.0163102948269811	0.196455258820498	-2.99195	Endothelial_cells__GGCT	GGCT	Endothelial_cells
-1.19393	-0.705412	-3.15989	0.0164082428808493	0.19687982522747	-2.99792	Endothelial_cells__CEP250	CEP250	Endothelial_cells
4.02542	-4.21769	3.15959969840238	0.0164147802397844	0.19687982522747	-2.99832	Endothelial_cells__PRDX6	PRDX6	Endothelial_cells
1.36718991779063	2.04025558274967	3.15883115051632	0.016432145628264	0.19687982522747	-2.99937	Endothelial_cells__METAP2	METAP2	Endothelial_cells
-1.55262	0.719126940264802	-3.15789	0.0164533342577819	0.19687982522747	-3.00066	Endothelial_cells__ABHD6	ABHD6	Endothelial_cells
1.25874191601917	-0.58408	3.15611443232889	0.0164936878651059	0.19687982522747	-3.0031	Endothelial_cells__POLR1E	POLR1E	Endothelial_cells
1.59503331646727	1.42143220451659	3.15582538307721	0.0165002502513908	0.19687982522747	-3.0035	Endothelial_cells__ABHD17A	ABHD17A	Endothelial_cells
-1.13231	-0.595621	-3.15535	0.0165111279597229	0.19687982522747	-3.00416	Endothelial_cells__SNX18	SNX18	Endothelial_cells
1.40718494760408	0.677060591182282	3.15197392203961	0.0165879585630899	0.197512988727607	-3.00878	Endothelial_cells__EGR3	EGR3	Endothelial_cells
1.52361841561696	-2.33176	3.1497825665808	0.0166380843571903	0.197826823006993	-3.01179	Endothelial_cells__PFKFB3	PFKFB3	Endothelial_cells
-1.07578	-1.0485	-3.14761	0.0166880091441431	0.198044345780407	-3.01478	Endothelial_cells__ISCA2	ISCA2	Endothelial_cells
-1.2251	0.547998820646677	-3.14691	0.0167039686096174	0.198044345780407	-3.01573	Endothelial_cells__SIPA1	SIPA1	Endothelial_cells
2.63305540375225	-0.752241	3.14530450441728	0.0167410218717703	0.198201315844586	-3.01794	Endothelial_cells__PRMT2	PRMT2	Endothelial_cells
2.69456147560438	-1.39172	3.14123834879259	0.0168350813432677	0.198863137946219	-3.02353	Endothelial_cells__DNAJC4	DNAJC4	Endothelial_cells
1.23485184469092	2.32178595935514	3.13939813593032	0.0168778353839896	0.198863137946219	-3.02606	Endothelial_cells__FSCN1	FSCN1	Endothelial_cells
-1.31397	0.903147192186711	-3.13894	0.0168885637932524	0.198863137946219	-3.02669	Endothelial_cells__ANKRD46	ANKRD46	Endothelial_cells
1.60216225128353	0.853790303866101	3.13717966353104	0.0169295320928398	0.198863137946219	-3.02911	Endothelial_cells__DLG4	DLG4	Endothelial_cells
-1.11273	0.967221443619489	-3.13674	0.0169397009570067	0.198863137946219	-3.0297	Endothelial_cells__DOLK	DOLK	Endothelial_cells
2.23085943112871	-2.23915	3.13671927230655	0.0169402817258043	0.198863137946219	-3.02974	Endothelial_cells__IFNGR2	IFNGR2	Endothelial_cells
1.47617953376622	-0.58649	3.13540179759922	0.0169710836862437	0.198904467756302	-3.03155	Endothelial_cells__MAPKAPK2	MAPKAPK2	Endothelial_cells
-1.19356	0.352685538772368	-3.1331	0.0170250748584606	0.198904467756302	-3.03472	Endothelial_cells__UNC5B	UNC5B	Endothelial_cells
-1.36364	1.3046934447958	-3.13263	0.017036159663968	0.198904467756302	-3.03536	Endothelial_cells__ARC	ARC	Endothelial_cells
1.61158509658664	2.06329794227569	3.1319544179033	0.0170519656759583	0.198904467756302	-3.03629	Endothelial_cells__CHD7	CHD7	Endothelial_cells
-1.3223	-0.168502	-3.13029	0.0170911297842672	0.198904467756302	-3.03858	Endothelial_cells__ARHGEF37	ARHGEF37	Endothelial_cells
-1.47587	-3.20271	-3.13006	0.0170964761323954	0.198904467756302	-3.03889	Endothelial_cells__APOBEC3G	APOBEC3G	Endothelial_cells
1.3351443312395	1.34360937783905	3.12944546347352	0.0171110896207512	0.198904467756302	-3.03974	Endothelial_cells__RALGDS	RALGDS	Endothelial_cells
1.70284706568168	-0.429512	3.12711329184007	0.0171662442827587	0.199267295907114	-3.04295	Endothelial_cells__LSM7	LSM7	Endothelial_cells
-1.38574	-1.07048	-3.1256	0.0172022030074644	0.199406595586527	-3.04503	Endothelial_cells__BLZF1	BLZF1	Endothelial_cells
1.46762983072381	0.315434049289852	3.12268294085478	0.0172715440810155	0.199931935168696	-3.04904	Endothelial_cells__RRP1	RRP1	Endothelial_cells
-1.13371	0.645470525531851	-3.12068	0.0173192715305928	0.200205967984895	-3.05179	Endothelial_cells__FYN	FYN	Endothelial_cells
1.41930558898482	-0.772992	3.11761012737334	0.017392962511138	0.200778955589738	-3.05603	Endothelial_cells__SNX3	SNX3	Endothelial_cells
-1.14774	-0.942827	-3.11614	0.0174282138692961	0.200907235504365	-3.05804	Endothelial_cells__HPS5	HPS5	Endothelial_cells
-1.10269	1.55401117421446	-3.11348	0.0174925599967471	0.201370092466011	-3.06172	Endothelial_cells__PDIA5	PDIA5	Endothelial_cells
1.06018461164496	-0.537732	3.11199661708882	0.0175283868573384	0.201424928387256	-3.06375	Endothelial_cells__PRPF8	PRPF8	Endothelial_cells
-1.64202	-0.945984	-3.11127	0.0175460338332229	0.201424928387256	-3.06476	Endothelial_cells__ZMAT5	ZMAT5	Endothelial_cells
-2.06805	-0.427681	-3.11028	0.0175699264699205	0.201424928387256	-3.06611	Endothelial_cells__NDUFA5	NDUFA5	Endothelial_cells
1.63285100001958	0.375847731876422	3.10823905331378	0.01761966636314	0.201540970158991	-3.06893	Endothelial_cells__DCTPP1	DCTPP1	Endothelial_cells
-1.53356	-0.651392	-3.10783	0.0176295402259804	0.201540970158991	-3.06949	Endothelial_cells__ZC3H12C	ZC3H12C	Endothelial_cells
1.07034763681348	-0.114093	3.10688460165181	0.0176526934093361	0.201540970158991	-3.0708	Endothelial_cells__ADGRA2	ADGRA2	Endothelial_cells
-1.34976	-0.409605	-3.10427	0.017716554683688	0.201992992647035	-3.0744	Endothelial_cells__PLEKHF2	PLEKHF2	Endothelial_cells
1.23429261311069	0.0529289107258353	3.10183323492498	0.0177764508284266	0.202351613912505	-3.07776	Endothelial_cells__NME4	NME4	Endothelial_cells
1.24059799583829	1.40190906173876	3.10101300572508	0.0177966335917282	0.202351613912505	-3.07889	Endothelial_cells__PUM3	PUM3	Endothelial_cells
-1.11903	0.0791766407646096	-3.09906	0.0178447489666229	0.202371108860523	-3.08158	Endothelial_cells__NXPE3	NXPE3	Endothelial_cells
1.52751056578793	-2.82565	3.09897134708592	0.0178469775205604	0.202371108860523	-3.0817	Endothelial_cells__CUTA	CUTA	Endothelial_cells
1.39589948100722	-0.597896	3.09711139875363	0.0178929731994924	0.202423954138542	-3.08427	Endothelial_cells__SPRYD4	SPRYD4	Endothelial_cells
-1.13387	-1.07863	-3.09682	0.0179002799766871	0.202423954138542	-3.08468	Endothelial_cells__PHF21A	PHF21A	Endothelial_cells
-1.2322	0.232573229738201	-3.09406	0.0179688262190594	0.202807277631494	-3.08848	Endothelial_cells__SLC12A4	SLC12A4	Endothelial_cells
1.08542818591111	0.209841007332274	3.09348923937837	0.0179829113170783	0.202807277631494	-3.08926	Endothelial_cells__RSL24D1	RSL24D1	Endothelial_cells
1.1306470945989	3.81840296046288	3.0915380401584	0.0180315595102683	0.202816247728158	-3.09196	Endothelial_cells__VIM	VIM	Endothelial_cells
-1.32963	-0.310428	-3.0915	0.0180324430276147	0.202816247728158	-3.092	Endothelial_cells__AKTIP	AKTIP	Endothelial_cells
-1.26014	0.175940794685665	-3.08743	0.0181345370925864	0.203632499347084	-3.09763	Endothelial_cells__HERC6	HERC6	Endothelial_cells
-1.16103	-0.166968	-3.08595	0.0181717390213533	0.203632499347084	-3.09967	Endothelial_cells__TTLL3	TTLL3	Endothelial_cells
3.91901580425545	-4.60845	3.08463357276964	0.0182048363878013	0.203632499347084	-3.10148	Endothelial_cells__ECHDC2	ECHDC2	Endothelial_cells
1.81879085565442	2.98128837909598	3.08414709885385	0.0182171119606819	0.203632499347084	-3.10215	Endothelial_cells__EIF5B	EIF5B	Endothelial_cells
-1.24545	-0.854704	-3.08282	0.0182505973443212	0.203632499347084	-3.10398	Endothelial_cells__DERA	DERA	Endothelial_cells
-1.5329	-1.34304	-3.08277	0.0182518135904031	0.203632499347084	-3.10405	Endothelial_cells__ZBTB37	ZBTB37	Endothelial_cells
1.03106408783753	0.395284693281883	3.08074902977827	0.0183031048713642	0.203768466146872	-3.10685	Endothelial_cells__PRPF38B	PRPF38B	Endothelial_cells
1.04772078689587	0.152931564891236	3.08036046581027	0.0183129655986856	0.203768466146872	-3.10738	Endothelial_cells__IRF2BP2	IRF2BP2	Endothelial_cells
-1.2103	0.988402678473664	-3.07817	0.0183686992462964	0.204115732746228	-3.11041	Endothelial_cells__GEMIN5	GEMIN5	Endothelial_cells
1.40385216038552	-0.024441	3.07676014862779	0.0184046022605134	0.204242006152337	-3.11235	Endothelial_cells__ESRRA	ESRRA	Endothelial_cells
1.38594761760322	-2.2272	3.07200183987288	0.0185264640092466	0.205320585817522	-3.11893	Endothelial_cells__LDLRAD4	LDLRAD4	Endothelial_cells
2.00884818305606	1.0317577159763	3.06839435016204	0.0186194266122687	0.205569324917075	-3.12391	Endothelial_cells__TPD52L1	TPD52L1	Endothelial_cells
1.36649081298527	0.227370505361749	3.06817567251586	0.0186250777639479	0.205569324917075	-3.12421	Endothelial_cells__ST6GALNAC4	ST6GALNAC4	Endothelial_cells
1.0052746257378	1.42982719536319	3.06745848830249	0.0186436243580571	0.205569324917075	-3.12521	Endothelial_cells__MTUS1	MTUS1	Endothelial_cells
-1.33234	2.7026742439998	-3.0673	0.0186477039904351	0.205569324917075	-3.12542	Endothelial_cells__SEC14L1	SEC14L1	Endothelial_cells
-1.09148	0.319702128859828	-3.06559	0.0186920036738832	0.205682116433839	-3.12779	Endothelial_cells__SH3RF1	SH3RF1	Endothelial_cells
1.91811876377722	-1.39065	3.06422855927501	0.0187273957630912	0.205682116433839	-3.12967	Endothelial_cells__YARS2	YARS2	Endothelial_cells
-3.22048	-0.845525	-3.06191	0.0187877111102765	0.205682116433839	-3.13287	Endothelial_cells__CDKN2B	CDKN2B	Endothelial_cells
1.74974893323565	-1.45412	3.06048629504033	0.0188249574354755	0.205682116433839	-3.13484	Endothelial_cells__EIF2D	EIF2D	Endothelial_cells
-1.23487	-0.703818	-3.05886	0.0188674978136267	0.205682116433839	-3.13709	Endothelial_cells__METTL7A	METTL7A	Endothelial_cells
1.44959575859278	-0.330269	3.05882290479127	0.0188684962772243	0.205682116433839	-3.13714	Endothelial_cells__TEX264	TEX264	Endothelial_cells
1.56436292865434	2.55393774431735	3.05830325641677	0.0188821199529436	0.205682116433839	-3.13786	Endothelial_cells__PRCP	PRCP	Endothelial_cells
-1.26942	0.739627738135749	-3.05778	0.0188958046364789	0.205682116433839	-3.13859	Endothelial_cells__PARN	PARN	Endothelial_cells
4.2031002573933	1.21587141188506	3.05742657102549	0.0189051278869341	0.205682116433839	-3.13908	Endothelial_cells__ADAM23	ADAM23	Endothelial_cells
1.44228302588141	-0.624166	3.05630095001663	0.0189347127865896	0.205682116433839	-3.14063	Endothelial_cells__SPATA20	SPATA20	Endothelial_cells
-1.15703	0.134841889019667	-3.05572	0.018949887694702	0.205682116433839	-3.14143	Endothelial_cells__DCAF10	DCAF10	Endothelial_cells
-1.61925	0.0429234563113668	-3.05465	0.0189780949634102	0.205682116433839	-3.14291	Endothelial_cells__ACTR10	ACTR10	Endothelial_cells
-1.06253	-0.860637	-3.05461	0.0189791980561322	0.205682116433839	-3.14297	Endothelial_cells__STRADB	STRADB	Endothelial_cells
1.4184200416618	-0.750976	3.05248849528745	0.0190352835181681	0.205771849210839	-3.14591	Endothelial_cells__ARHGEF7	ARHGEF7	Endothelial_cells
-1.4155	-0.990242	-3.05153	0.019060602513377	0.205771849210839	-3.14723	Endothelial_cells__CHAMP1	CHAMP1	Endothelial_cells
2.76527459394537	-0.438302	3.05046785061204	0.0190888179324861	0.205771849210839	-3.1487	Endothelial_cells__REXO2	REXO2	Endothelial_cells
0.996334196824033	-0.36528	3.04931157925518	0.0191195240529817	0.205771849210839	-3.1503	Endothelial_cells__CTDNEP1	CTDNEP1	Endothelial_cells
1.07909678336958	-0.343649	3.0482461875587	0.0191478633688719	0.205771849210839	-3.15178	Endothelial_cells__KMT2B	KMT2B	Endothelial_cells
-1.16665	4.23324276008781	-3.04823	0.0191483800718927	0.205771849210839	-3.15181	Endothelial_cells__PECAM1	PECAM1	Endothelial_cells
1.05415779434416	-1.973	3.04777012536497	0.019160541047507	0.205771849210839	-3.15244	Endothelial_cells__SLC25A26	SLC25A26	Endothelial_cells
-1.80878	-0.690981	-3.04386	0.0192648985333062	0.206519308601758	-3.15785	Endothelial_cells__MAP7	MAP7	Endothelial_cells
-1.00756	-2.0245	-3.04331	0.0192797672454122	0.206519308601758	-3.15861	Endothelial_cells__WDR41	WDR41	Endothelial_cells
-0.985417	1.98647562114672	-3.04115	0.0193377901117703	0.20684576549487	-3.1616	Endothelial_cells__GRK5	GRK5	Endothelial_cells
-1.31553	0.425403298400793	-3.04033	0.0193599484945938	0.20684576549487	-3.16274	Endothelial_cells__ARRB1	ARRB1	Endothelial_cells
-1.40434	-0.447772	-3.03817	0.0194181168275886	0.206864948798365	-3.16573	Endothelial_cells__IPPK	IPPK	Endothelial_cells
-1.23122	0.274160017768449	-3.03816	0.0194183858239005	0.206864948798365	-3.16574	Endothelial_cells__FBXL3	FBXL3	Endothelial_cells
1.28687493723243	-1.21725	3.03611813790779	0.0194736424375226	0.206864948798365	-3.16857	Endothelial_cells__HSD3B7	HSD3B7	Endothelial_cells
-1.07923	-1.05013	-3.03592	0.0194790385053632	0.206864948798365	-3.16885	Endothelial_cells__ADI1	ADI1	Endothelial_cells
1.01812382812923	-0.6681	3.03566172935689	0.0194860170440848	0.206864948798365	-3.16921	Endothelial_cells__RHPN1	RHPN1	Endothelial_cells
1.29903819978131	0.221739034257465	3.03299978912497	0.0195583573475389	0.20713044695346	-3.17289	Endothelial_cells__TOMM34	TOMM34	Endothelial_cells
-1.05211	-1.33824	-3.03255	0.0195705655227875	0.20713044695346	-3.17351	Endothelial_cells__HIBADH	HIBADH	Endothelial_cells
-0.997045	0.710226108795608	-3.03188	0.0195888920432523	0.20713044695346	-3.17445	Endothelial_cells__DENND6A	DENND6A	Endothelial_cells
1.37375230196355	2.20294796553136	3.03081423881227	0.0196179652437864	0.20713044695346	-3.17592	Endothelial_cells__SERPINH1	SERPINH1	Endothelial_cells
-1.11597	-0.0590704	-3.03017	0.0196354586863246	0.20713044695346	-3.17681	Endothelial_cells__BCL2L1	BCL2L1	Endothelial_cells
-1.58353	-1.2248	-3.02717	0.0197176986218204	0.207324288323555	-3.18097	Endothelial_cells__SPG11	SPG11	Endothelial_cells
-1.90513	0.371563450131723	-3.02542	0.0197658129392911	0.207324288323555	-3.18339	Endothelial_cells__NR3C2	NR3C2	Endothelial_cells
1.1597243754094	0.582641725498337	3.02502410098718	0.0197768206156018	0.207324288323555	-3.18395	Endothelial_cells__UBAP2	UBAP2	Endothelial_cells
1.71397161134314	1.15460216819326	3.02462685981796	0.0197877692278148	0.207324288323555	-3.1845	Endothelial_cells__CCT2	CCT2	Endothelial_cells
-1.25709	-0.9688	-3.02416	0.0198007643895021	0.207324288323555	-3.18515	Endothelial_cells__ACADS	ACADS	Endothelial_cells
1.08257960448358	0.0611940502344918	3.02368480846167	0.0198137595047627	0.207324288323555	-3.18581	Endothelial_cells__COX20	COX20	Endothelial_cells
-1.1054	0.350858249228242	-3.02316	0.0198282029923765	0.207324288323555	-3.18653	Endothelial_cells__THRA	THRA	Endothelial_cells
3.91788301678853	-2.55854	3.01959198002699	0.0199270993760381	0.207821331852657	-3.19148	Endothelial_cells__MTHFD2	MTHFD2	Endothelial_cells
1.50831845399046	-0.664154	3.01916919218199	0.0199388466215021	0.207821331852657	-3.19207	Endothelial_cells__YDJC	YDJC	Endothelial_cells
-1.95423	-0.309326	-3.01736	0.0199891489485437	0.207821331852657	-3.19458	Endothelial_cells__SMAD7	SMAD7	Endothelial_cells
-1.00277	-0.539035	-3.01695	0.0200005239799383	0.207821331852657	-3.19514	Endothelial_cells__HS1BP3	HS1BP3	Endothelial_cells
-1.71602	-1.21014	-3.01695	0.0200005871457381	0.207821331852657	-3.19514	Endothelial_cells__HINT2	HINT2	Endothelial_cells
1.45547623519281	-1.81241	3.01294362366405	0.0201126814210031	0.208379358470358	-3.20071	Endothelial_cells__SSR4	SSR4	Endothelial_cells
1.27238835539827	-0.406464	3.01235944356945	0.0201290759069233	0.208379358470358	-3.20152	Endothelial_cells__RNF217	RNF217	Endothelial_cells
2.98703394818801	2.98981446946864	3.01174666559985	0.0201462882515791	0.208379358470358	-3.20237	Endothelial_cells__ABCB1	ABCB1	Endothelial_cells
-1.13285	0.863908689275154	-3.00972	0.0202033271554629	0.208379358470358	-3.20518	Endothelial_cells__ITGA3	ITGA3	Endothelial_cells
-1.34868	0.429989235034554	-3.00829	0.0202436932060979	0.208379358470358	-3.20717	Endothelial_cells__BCL7B	BCL7B	Endothelial_cells
-2.33966	-0.945979	-3.00776	0.0202586108324966	0.208379358470358	-3.2079	Endothelial_cells__PLXNC1	PLXNC1	Endothelial_cells
-1.54839	0.648903066843281	-3.00689	0.0202833243115255	0.208379358470358	-3.20911	Endothelial_cells__STX17	STX17	Endothelial_cells
-1.50145	-1.93504	-3.00659	0.0202918751206249	0.208379358470358	-3.20953	Endothelial_cells__ADH5	ADH5	Endothelial_cells
1.60972771414168	-0.525505	3.00637909190969	0.0202977294396737	0.208379358470358	-3.20982	Endothelial_cells__SAMM50	SAMM50	Endothelial_cells
1.74829507581663	0.08530827997214	3.0061345786872	0.020304656940942	0.208379358470358	-3.21016	Endothelial_cells__FARSA	FARSA	Endothelial_cells
1.54528620092883	-1.26608	3.0036721350838	0.020374562814551	0.208822628825161	-3.21358	Endothelial_cells__COL6A3	COL6A3	Endothelial_cells
-0.9842	-0.486068	-3.00285	0.020398029224421	0.208822628825161	-3.21472	Endothelial_cells__C1D	C1D	Endothelial_cells
1.16814682192724	-1.73963	2.99927	0.0205000444465663	0.209609176816672	-3.21968	Endothelial_cells__PLEKHJ1	PLEKHJ1	Endothelial_cells
-1.18946	0.840833641448808	-2.99496	0.020623894195934	0.210393585720288	-3.22567	Endothelial_cells__PHAX	PHAX	Endothelial_cells
-1.13979	-1.25165	-2.99484	0.0206273177877875	0.210393585720288	-3.22584	Endothelial_cells__DBNL	DBNL	Endothelial_cells
-1.10066	0.4185935306958	-2.99293	0.0206826605115537	0.210516017234831	-3.2285	Endothelial_cells__ATP10D	ATP10D	Endothelial_cells
-1.54002	1.38569906978398	-2.99267	0.0206899077373653	0.210516017234831	-3.22885	Endothelial_cells__TAF7	TAF7	Endothelial_cells
1.33344523773365	-0.190894	2.99120735037202	0.020732372901088	0.210675185822882	-3.23089	Endothelial_cells__TNK2	TNK2	Endothelial_cells
1.67787688973302	0.221915148006675	2.98953400532385	0.0207809138541868	0.210675185822882	-3.23322	Endothelial_cells__HMOX2	HMOX2	Endothelial_cells
-1.13671	-0.704904	-2.98877	0.0208030280713742	0.210675185822882	-3.23428	Endothelial_cells__AP5Z1	AP5Z1	Endothelial_cells
2.10594723594279	1.64620894396279	2.98825499576918	0.0208180972641236	0.210675185822882	-3.235	Endothelial_cells__NXT1	NXT1	Endothelial_cells
3.40759991884664	0.760576819938001	2.98710245005332	0.0208516647058966	0.210675185822882	-3.2366	Endothelial_cells__CBX3	CBX3	Endothelial_cells
3.43518827334278	-1.31621	2.9869048473958	0.0208574255818881	0.210675185822882	-3.23687	Endothelial_cells__EEF1B2	EEF1B2	Endothelial_cells
1.24070562647879	1.22640143769235	2.9856207948925	0.0208949018867671	0.210686137542535	-3.23866	Endothelial_cells__GPATCH4	GPATCH4	Endothelial_cells
1.19098271269802	-0.742282	2.98513368827519	0.0209091372834475	0.210686137542535	-3.23934	Endothelial_cells__MAFG	MAFG	Endothelial_cells
-1.20926	-0.791882	-2.98379	0.0209484419112656	0.210800868615281	-3.2412	Endothelial_cells__PLEKHH3	PLEKHH3	Endothelial_cells
0.977162171131552	1.37321071446766	2.9827390802783	0.0209792683245012	0.210800868615281	-3.24267	Endothelial_cells__CYP27A1	CYP27A1	Endothelial_cells
-1.982	-0.849873	-2.98181	0.0210064626747294	0.210800868615281	-3.24395	Endothelial_cells__ST3GAL3	ST3GAL3	Endothelial_cells
1.73475273907577	2.27510976100775	2.98102061027195	0.0210297513431964	0.210800868615281	-3.24505	Endothelial_cells__PLVAP	PLVAP	Endothelial_cells
1.13156710002052	1.18735210674644	2.97959391574202	0.021071761044416	0.210800868615281	-3.24704	Endothelial_cells__EPHA4	EPHA4	Endothelial_cells
1.35352787971819	-0.402512	2.97956923352544	0.0210724886084241	0.210800868615281	-3.24707	Endothelial_cells__PSMD14	PSMD14	Endothelial_cells
-1.28462	-0.346816	-2.97698	0.0211490345321959	0.211312622342697	-3.25068	Endothelial_cells__ALDH9A1	ALDH9A1	Endothelial_cells
-2.04886	-0.429223	-2.97507	0.0212055860184384	0.211623612028133	-3.25333	Endothelial_cells__MEGF8	MEGF8	Endothelial_cells
1.55934405311106	0.910459134238629	2.9723520983695	0.0212863793873053	0.212175491785081	-3.25711	Endothelial_cells__NFATC2	NFATC2	Endothelial_cells
1.77988009791216	0.524025719797802	2.97004031020105	0.0213553795822664	0.212608641463162	-3.26033	Endothelial_cells__GRPEL1	GRPEL1	Endothelial_cells
1.2125576385332	0.238766547674703	2.96787680386915	0.0214201692505302	0.212998887302465	-3.26334	Endothelial_cells__SQLE	SQLE	Endothelial_cells
1.11535464147784	-1.09052	2.96688224195059	0.0214500230262397	0.213041219149634	-3.26473	Endothelial_cells__PLEKHB2	PLEKHB2	Endothelial_cells
-1.86471	2.0888433355446	-2.96526	0.0214987113883154	0.213270291877174	-3.26698	Endothelial_cells__CMTM8	CMTM8	Endothelial_cells
2.14300683315936	6.71286241627649	2.96378881202806	0.0215431613745424	0.213456823952758	-3.26903	Endothelial_cells__COTL1	COTL1	Endothelial_cells
1.00419579065629	-1.20009	2.96259610882879	0.02157918644832	0.213559534850615	-3.2707	Endothelial_cells__ZFAND3	ZFAND3	Endothelial_cells
1.10628204913652	-0.790271	2.96108531464544	0.0216249111865834	0.213757881004672	-3.2728	Endothelial_cells__CRTAP	CRTAP	Endothelial_cells
-1.2695	-0.352662	-2.95981	0.0216636730836946	0.213793347927322	-3.27458	Endothelial_cells__GTF2E1	GTF2E1	Endothelial_cells
-2.36397	-0.584183	-2.95892	0.021690697187858	0.213793347927322	-3.27582	Endothelial_cells__RTP4	RTP4	Endothelial_cells
1.91063970929128	-2.61831	2.95842882884989	0.021705560374695	0.213793347927322	-3.2765	Endothelial_cells__ARHGEF28	ARHGEF28	Endothelial_cells
-0.983975	-0.356701	-2.95509	0.0218075083583735	0.214543607643903	-3.28116	Endothelial_cells__RNF34	RNF34	Endothelial_cells
1.06818051072393	-0.180225	2.95336557394277	0.021860163222669	0.214652250060469	-3.28355	Endothelial_cells__NUMBL	NUMBL	Endothelial_cells
-1.01452	2.17371438612461	-2.95304	0.0218701319297462	0.214652250060469	-3.28401	Endothelial_cells__GIMAP6	GIMAP6	Endothelial_cells
1.01756131401003	0.294103284085584	2.95138042304335	0.0219210970112214	0.214899046436273	-3.28632	Endothelial_cells__SF3A3	SF3A3	Endothelial_cells
1.60380992863828	-1.36456	2.94820462206175	0.0220189527441743	0.215323123551602	-3.29075	Endothelial_cells__POLR1D	POLR1D	Endothelial_cells
1.11651536177786	-0.891931	2.94765867632322	0.0220358215794593	0.215323123551602	-3.29151	Endothelial_cells__KLHDC4	KLHDC4	Endothelial_cells
2.11210261960127	-2.97742	2.94745985657735	0.0220419681924745	0.215323123551602	-3.29178	Endothelial_cells__APH1B	APH1B	Endothelial_cells
-1.45454	-1.55555	-2.94265	0.0221912114779739	0.216526908711813	-3.29849	Endothelial_cells__CXCL8	CXCL8	Endothelial_cells
1.48748953635362	-0.984143	2.94156031090581	0.0222251860617683	0.216604477274119	-3.30001	Endothelial_cells__DTX3	DTX3	Endothelial_cells
-1.02653	0.488076273926694	-2.94063	0.0222541856085696	0.216633434877338	-3.3013	Endothelial_cells__ASCC1	ASCC1	Endothelial_cells
-1.1764	-1.55733	-2.93702	0.0223673216660751	0.217070264434683	-3.30634	Endothelial_cells__ENOSF1	ENOSF1	Endothelial_cells
1.11722925038952	-0.00305896	2.93670598752738	0.0223771549139591	0.217070264434683	-3.30678	Endothelial_cells__WDR18	WDR18	Endothelial_cells
1.91983021793287	-0.356789	2.93670129718872	0.0223773022810234	0.217070264434683	-3.30678	Endothelial_cells__ZNF512B	ZNF512B	Endothelial_cells
-0.948685	-0.143203	-2.93495	0.0224324809583799	0.21720403987265	-3.30923	Endothelial_cells__PIAS1	PIAS1	Endothelial_cells
0.974007083786832	3.33233447881608	2.93460446044453	0.0224432865902293	0.21720403987265	-3.30971	Endothelial_cells__CORO1C	CORO1C	Endothelial_cells
1.48387521076588	-0.802882	2.93287732081184	0.0224977920757196	0.217473150693128	-3.31212	Endothelial_cells__LYPLA2	LYPLA2	Endothelial_cells
1.54646230450096	-1.13778	2.93128532651756	0.0225481569566742	0.217473150693128	-3.31434	Endothelial_cells__ABHD14A	ABHD14A	Endothelial_cells
-1.23847	-0.622058	-2.93124	0.0225494808420245	0.217473150693128	-3.3144	Endothelial_cells__CTNS	CTNS	Endothelial_cells
1.10688450961455	-0.400186	2.93003921066467	0.0225876629254355	0.217589257556018	-3.31608	Endothelial_cells__FAM210A	FAM210A	Endothelial_cells
1.51076664751505	-1.93599	2.92919229662974	0.022614554773287	0.217596461708749	-3.31726	Endothelial_cells__FUZ	FUZ	Endothelial_cells
-7.32596	-1.38295	-2.92772	0.0226613079034853	0.217794533118601	-3.31931	Endothelial_cells__HPGD	HPGD	Endothelial_cells
1.15936179553076	1.44748396667027	2.92534929161097	0.0227370079464148	0.217924827562723	-3.32262	Endothelial_cells__MCTP1	MCTP1	Endothelial_cells
1.37217301179719	-2.28873	2.92481916651429	0.0227539549022593	0.217924827562723	-3.32336	Endothelial_cells__CERS6	CERS6	Endothelial_cells
0.982623357459176	-0.566054	2.92379821829248	0.0227866301529655	0.217924827562723	-3.32479	Endothelial_cells__RNF220	RNF220	Endothelial_cells
1.44468618075028	0.347340124396938	2.92326358218323	0.022803760919209	0.217924827562723	-3.32554	Endothelial_cells__FAM98B	FAM98B	Endothelial_cells
1.21113228744295	-2.76799	2.92320052953673	0.0228057821467177	0.217924827562723	-3.32562	Endothelial_cells__ACAT2	ACAT2	Endothelial_cells
-0.937292	-0.217316	-2.9205	0.0228925153848706	0.218277357538876	-3.32939	Endothelial_cells__CPT2	CPT2	Endothelial_cells
-0.972345	-0.256926	-2.92032	0.0228982433685081	0.218277357538876	-3.32964	Endothelial_cells__HSPBAP1	HSPBAP1	Endothelial_cells
0.98312939917715	-0.586468	2.9196051283261	0.0229213517348285	0.218277357538876	-3.33064	Endothelial_cells__TP53BP1	TP53BP1	Endothelial_cells
-1.25714	-0.721925	-2.91632	0.0230274328140586	0.219036940927325	-3.33523	Endothelial_cells__PXMP4	PXMP4	Endothelial_cells
-1.05689	5.31260271502486	-2.91357	0.0231168056876716	0.219636043080468	-3.33908	Endothelial_cells__SGK1	SGK1	Endothelial_cells
1.06224435010514	0.796552635395481	2.91208181493739	0.0231651919979059	0.219844803875223	-3.34115	Endothelial_cells__WDR12	WDR12	Endothelial_cells
1.37118365793935	1.51583795952496	2.91121562728928	0.0231934421941315	0.219862208863048	-3.34236	Endothelial_cells__RND1	RND1	Endothelial_cells
1.13762723268455	-1.00327	2.90972689513985	0.0232420816185247	0.2199653355778	-3.34444	Endothelial_cells__HMGB3	HMGB3	Endothelial_cells
-0.99317	1.2029064794024	-2.90913	0.0232616397759862	0.2199653355778	-3.34528	Endothelial_cells__UBLCP1	UBLCP1	Endothelial_cells
1.37384152351761	1.09149306649814	2.90648462601473	0.02334838641124	0.2199653355778	-3.34897	Endothelial_cells__TCEAL4	TCEAL4	Endothelial_cells
-1.6107	-0.300346	-2.90635	0.0233527855481703	0.2199653355778	-3.34916	Endothelial_cells__ERAP2	ERAP2	Endothelial_cells
-1.44213	-0.887698	-2.90593	0.0233667014307788	0.2199653355778	-3.34975	Endothelial_cells__MIEN1	MIEN1	Endothelial_cells
-0.955464	0.114106914597177	-2.90581	0.0233706395038637	0.2199653355778	-3.34992	Endothelial_cells__ZNF7	ZNF7	Endothelial_cells
-1.12935	0.808789268260978	-2.90524	0.0233893213968945	0.2199653355778	-3.35071	Endothelial_cells__PLEKHA3	PLEKHA3	Endothelial_cells
1.07129662982225	-0.872666	2.90422144852404	0.0234228947085778	0.220032452211617	-3.35213	Endothelial_cells__HMCES	HMCES	Endothelial_cells
1.5117798816067	-1.06578	2.90194053742881	0.023498241667304	0.220491392781253	-3.35532	Endothelial_cells__PCSK5	PCSK5	Endothelial_cells
-0.971144	-0.843387	-2.90058	0.0235434215055781	0.220512925167912	-3.35723	Endothelial_cells__MIER3	MIER3	Endothelial_cells
-0.966909	0.95143660748621	-2.90027	0.0235535252281958	0.220512925167912	-3.35766	Endothelial_cells__PRIMPOL	PRIMPOL	Endothelial_cells
1.02847	-1.52918	2.89841205651647	0.0236153065548756	0.220578092817854	-3.36026	Endothelial_cells__FUCA2	FUCA2	Endothelial_cells
-1.3446	0.39150343899962	-2.89785	0.0236338541099758	0.220578092817854	-3.36103	Endothelial_cells__RNF115	RNF115	Endothelial_cells
1.48852204349477	2.42507581446581	2.89767035181078	0.0236399926461043	0.220578092817854	-3.36129	Endothelial_cells__CPLX1	CPLX1	Endothelial_cells
1.59920413484433	-0.485716	2.89628002868062	0.0236863402833647	0.220588452042105	-3.36324	Endothelial_cells__ERGIC3	ERGIC3	Endothelial_cells
0.977869776945124	0.422476441619577	2.89604724191756	0.0236941098312678	0.220588452042105	-3.36356	Endothelial_cells__KDM2A	KDM2A	Endothelial_cells
-0.94719	-2.31902	-2.89276	0.0238039706176902	0.221121592274692	-3.36815	Endothelial_cells__CMC1	CMC1	Endothelial_cells
1.03202755483031	-0.208287	2.89246594988922	0.0238139805455379	0.221121592274692	-3.36857	Endothelial_cells__RUFY3	RUFY3	Endothelial_cells
-0.98043	0.141633566868615	-2.89196	0.0238310787300731	0.221121592274692	-3.36928	Endothelial_cells__TSPYL5	TSPYL5	Endothelial_cells
1.34094427384502	4.69525531114395	2.89057394193935	0.0238775676214785	0.221306230861432	-3.37122	Endothelial_cells__RDX	RDX	Endothelial_cells
-1.1686	-0.576487	-2.88936	0.023918318781748	0.221437338398764	-3.37291	Endothelial_cells__DHRS3	DHRS3	Endothelial_cells
-1.42212	-0.123705	-2.88604	0.0240308312131619	0.222231786874607	-3.37757	Endothelial_cells__ZNF143	ZNF143	Endothelial_cells
1.03385214100003	-1.6306	2.8834718470877	0.024117864453413	0.222789107486966	-3.38115	Endothelial_cells__DESI1	DESI1	Endothelial_cells
1.14889138229252	-0.98288	2.8793311693931	0.0242591424378752	0.22384572340403	-3.38695	Endothelial_cells__CAMK1D	CAMK1D	Endothelial_cells
-1.24736	1.11681892981557	-2.87842	0.0242901898273863	0.223883997711336	-3.38822	Endothelial_cells__IL6	IL6	Endothelial_cells
-1.80765	0.179092659762008	-2.87612	0.0243691563432998	0.224000167784332	-3.39144	Endothelial_cells__NEO1	NEO1	Endothelial_cells
1.15556179162702	-0.718709	2.87585411648503	0.0243784540802914	0.224000167784332	-3.39181	Endothelial_cells__SLC30A1	SLC30A1	Endothelial_cells
-1.49509	-1.90135	-2.87521	0.0244006807302992	0.224000167784332	-3.39272	Endothelial_cells__KBTBD11	KBTBD11	Endothelial_cells
-1.33103	0.581137913532585	-2.87319	0.024470276909297	0.224000167784332	-3.39554	Endothelial_cells__FAM122C	FAM122C	Endothelial_cells
-1.24935	-0.309621	-2.87315	0.0244717620574444	0.224000167784332	-3.3956	Endothelial_cells__SUN2	SUN2	Endothelial_cells
-2.39851	-2.6955	-2.87232	0.0245003109811723	0.224000167784332	-3.39676	Endothelial_cells__TTN	TTN	Endothelial_cells
-0.971547	-0.144435	-2.87134	0.0245344338378711	0.224000167784332	-3.39814	Endothelial_cells__ZNF362	ZNF362	Endothelial_cells
-0.962131	-1.24926	-2.87118	0.0245397107809809	0.224000167784332	-3.39835	Endothelial_cells__ANKMY2	ANKMY2	Endothelial_cells
0.993184138390478	0.177530456230039	2.87095002811956	0.0245477890796187	0.224000167784332	-3.39868	Endothelial_cells__DIAPH1	DIAPH1	Endothelial_cells
2.40607346695519	-0.866857	2.87025387083924	0.0245719275726415	0.224000167784332	-3.39966	Endothelial_cells__C16ORF91	C16ORF91	Endothelial_cells
-1.24884	-0.332937	-2.86911	0.0246116724007444	0.224117012463234	-3.40126	Endothelial_cells__GATA3	GATA3	Endothelial_cells
1.62205514271043	1.58718808848779	2.86674078742074	0.0246941233678903	0.224473167019507	-3.40458	Endothelial_cells__NOS3	NOS3	Endothelial_cells
-1.05702	-1.38118	-2.8659	0.0247235235653915	0.224473167019507	-3.40576	Endothelial_cells__LACTB2	LACTB2	Endothelial_cells
1.38665345549686	0.0580506355175128	2.86555085310354	0.0247356584472871	0.224473167019507	-3.40624	Endothelial_cells__POLD2	POLD2	Endothelial_cells
1.16229386962505	-1.42601	2.86489265442392	0.0247586648232497	0.224473167019507	-3.40716	Endothelial_cells__NT5DC2	NT5DC2	Endothelial_cells
3.0868382613321	0.062638984481663	2.86326133622123	0.0248157827319563	0.224550210406291	-3.40945	Endothelial_cells__NME1	NME1	Endothelial_cells
-1.73919	-1.23647	-2.86292	0.0248278362150247	0.224550210406291	-3.40993	Endothelial_cells__C1GALT1	C1GALT1	Endothelial_cells
1.29003819142938	-0.124721	2.86234006916758	0.0248481008992184	0.224550210406291	-3.41074	Endothelial_cells__SUGT1	SUGT1	Endothelial_cells
1.28448129834316	-0.867628	2.85981611623872	0.0249368695836406	0.225107988660131	-3.41428	Endothelial_cells__SMURF1	SMURF1	Endothelial_cells
-0.941027	-0.227052	-2.85794	0.0250032239555497	0.225462440933955	-3.41691	Endothelial_cells__ANKS1A	ANKS1A	Endothelial_cells
1.25571347208687	-0.295063	2.85495934240546	0.0251086289943928	0.226096131710807	-3.42108	Endothelial_cells__PQBP1	PQBP1	Endothelial_cells
1.75356279974784	-2.86401	2.85441861040042	0.0251278291280183	0.226096131710807	-3.42184	Endothelial_cells__RAB4A	RAB4A	Endothelial_cells
-1.4042	-0.504211	-2.85267	0.0251898960436811	0.226409832366693	-3.42429	Endothelial_cells__OARD1	OARD1	Endothelial_cells
-1.02128	1.60267268315037	-2.85145	0.0252334966435188	0.226477375062518	-3.426	Endothelial_cells__PRPSAP1	PRPSAP1	Endothelial_cells
-0.946546	0.0476613684905942	-2.85082	0.0252559295918781	0.226477375062518	-3.42688	Endothelial_cells__ATG4C	ATG4C	Endothelial_cells
-1.18956	2.45432547831355	-2.8499	0.0252889703564116	0.226477375062518	-3.42818	Endothelial_cells__FUOM	FUOM	Endothelial_cells
1.3810542309065	0.365088620348279	2.8487145355581	0.0253313149533239	0.226477375062518	-3.42984	Endothelial_cells__ARNTL2	ARNTL2	Endothelial_cells
-1.65246	-0.324544	-2.84865	0.0253334658396257	0.226477375062518	-3.42992	Endothelial_cells__OSBPL1A	OSBPL1A	Endothelial_cells
1.59413940948872	-0.548521	2.84665815273099	0.0254051001168445	0.226874086129288	-3.43272	Endothelial_cells__BLOC1S4	BLOC1S4	Endothelial_cells
-1.06105	-0.0318027	-2.84577	0.0254371356087126	0.226916698468719	-3.43397	Endothelial_cells__SETBP1	SETBP1	Endothelial_cells
-1.83484	1.78579287265341	-2.84415	0.0254954619018475	0.227193500437984	-3.43624	Endothelial_cells__ITM2B	ITM2B	Endothelial_cells
-1.20038	5.2656648825126	-2.84047	0.0256283783353393	0.228133682229978	-3.44139	Endothelial_cells__AKR1B1	AKR1B1	Endothelial_cells
2.33038134485421	0.489786716142502	2.83863608864812	0.0256951170145563	0.228306825716659	-3.44397	Endothelial_cells__EIF3D	EIF3D	Endothelial_cells
1.83584516914865	-2.71165	2.83842787498395	0.0257026908201982	0.228306825716659	-3.44426	Endothelial_cells__EIF3K	EIF3K	Endothelial_cells
1.24200941890981	-0.0596249	2.83607805196754	0.0257883295771672	0.228823312442178	-3.44756	Endothelial_cells__HM13	HM13	Endothelial_cells
1.23475518207333	0.340821515525899	2.83348684286879	0.025883114899548	0.229394163241931	-3.45119	Endothelial_cells__SLC35E4	SLC35E4	Endothelial_cells
-1.15314	1.0850981682178	-2.83192	0.0259405465466763	0.229394163241931	-3.45339	Endothelial_cells__SLC31A2	SLC31A2	Endothelial_cells
2.47168544657367	-1.29762	2.83155263863901	0.0259541069054008	0.229394163241931	-3.45391	Endothelial_cells__TXNDC5	TXNDC5	Endothelial_cells
-1.13546	2.42985084273153	-2.83131	0.0259629102215426	0.229394163241931	-3.45424	Endothelial_cells__MTRF1L	MTRF1L	Endothelial_cells
1.2514035228136	-1.10932	2.82952759059653	0.0260286534326278	0.229731158557541	-3.45675	Endothelial_cells__NOA1	NOA1	Endothelial_cells
-0.974055	-0.430299	-2.82839	0.0260705458481315	0.22985715370127	-3.45834	Endothelial_cells__ZNF318	ZNF318	Endothelial_cells
1.41940354727434	3.58350370857229	2.8276447592104	0.0260981673623814	0.229857192547196	-3.45939	Endothelial_cells__HSP90AB1	HSP90AB1	Endothelial_cells
-1.87026	-0.0481752	-2.82497	0.0261972903173	0.230187062476607	-3.46315	Endothelial_cells__RSAD2	RSAD2	Endothelial_cells
0.982210333178963	0.170973583666383	2.82445680951461	0.0262163130917361	0.230187062476607	-3.46387	Endothelial_cells__NR2C2AP	NR2C2AP	Endothelial_cells
-1.19499	-1.26	-2.8244	0.0262185912805266	0.230187062476607	-3.46395	Endothelial_cells__CTBS	CTBS	Endothelial_cells
1.21613294394319	0.934299109018124	2.82178819921205	0.0263156458913578	0.230795701531898	-3.46761	Endothelial_cells__CCDC85C	CCDC85C	Endothelial_cells
-4.42646	-3.39399	-2.81769	0.0264690066953331	0.231602494277456	-3.47337	Endothelial_cells__MBP	MBP	Endothelial_cells
-1.74988	-2.11654	-2.817	0.0264948613917418	0.231602494277456	-3.47434	Endothelial_cells__FAM214B	FAM214B	Endothelial_cells
1.26688064582787	-0.955278	2.81603671853198	0.0265310836022905	0.231602494277456	-3.47569	Endothelial_cells__GRHPR	GRHPR	Endothelial_cells
1.8438778752398	-0.345931	2.81601117180097	0.0265320446648275	0.231602494277456	-3.47573	Endothelial_cells__IFFO2	IFFO2	Endothelial_cells
-1.30444	-1.70037	-2.81523	0.0265612774559967	0.231602494277456	-3.47682	Endothelial_cells__GALC	GALC	Endothelial_cells
-1.08996	-0.662432	-2.81488	0.0265745983461457	0.231602494277456	-3.47731	Endothelial_cells__GABPB1	GABPB1	Endothelial_cells
-2.3348	0.947173844618892	-2.81351	0.0266262351702051	0.231809785901273	-3.47924	Endothelial_cells__SYNE1	SYNE1	Endothelial_cells
0.963076790099491	-0.00430667	2.81179175235063	0.0266912831508507	0.232133280736186	-3.48165	Endothelial_cells__CBLB	CBLB	Endothelial_cells
-0.967072	-0.38283	-2.80981	0.0267662473060952	0.232161192378209	-3.48443	Endothelial_cells__TMEM167B	TMEM167B	Endothelial_cells
2.1475945092949	-0.8002	2.80980709809126	0.0267665310118049	0.232161192378209	-3.48444	Endothelial_cells__MID2	MID2	Endothelial_cells
-1.18287	1.50406887556852	-2.8095	0.0267781742980993	0.232161192378209	-3.48487	Endothelial_cells__SPOP	SPOP	Endothelial_cells
-1.73778	-2.14338	-2.80816	0.0268292920695861	0.232292524529669	-3.48676	Endothelial_cells__TMEM51	TMEM51	Endothelial_cells
-1.31277	1.65581532895564	-2.80764	0.026849141967745	0.232292524529669	-3.48749	Endothelial_cells__GRAP	GRAP	Endothelial_cells
1.3190748154908	2.58413266450032	2.80130047915264	0.0270916004069531	0.233696077989696	-3.49639	Endothelial_cells__ETS1	ETS1	Endothelial_cells
2.1163640311782	0.959226048228347	2.80120412606258	0.02709530615493	0.233696077989696	-3.49653	Endothelial_cells__MPZL2	MPZL2	Endothelial_cells
0.92427502215908	-0.349259	2.8011963725047	0.0270956043806388	0.233696077989696	-3.49654	Endothelial_cells__RAI1	RAI1	Endothelial_cells
4.8209644976336	39.1157594644608	2.79886220086554	0.0271855412425425	0.233983228713921	-3.49982	Endothelial_cells__ANXA2	ANXA2	Endothelial_cells
-1.38869	-0.526692	-2.79846	0.0272009469678317	0.233983228713921	-3.50038	Endothelial_cells__SCYL3	SCYL3	Endothelial_cells
-1.86044	-2.1105	-2.79815	0.0272132362603719	0.233983228713921	-3.50083	Endothelial_cells__SMIM14	SMIM14	Endothelial_cells
-2.41823	0.403575367815933	-2.79703	0.0272562291752979	0.234111037591336	-3.50239	Endothelial_cells__KLHDC1	KLHDC1	Endothelial_cells
1.50599332235919	-0.0475929	2.79516538274636	0.0273286256681762	0.23449087776931	-3.50502	Endothelial_cells__MAPKBP1	MAPKBP1	Endothelial_cells
1.26277346021665	0.844073173816257	2.79282946905045	0.0274194454475865	0.235027852173288	-3.5083	Endothelial_cells__RNPS1	RNPS1	Endothelial_cells
-0.914036	-0.452071	-2.79144	0.0274734987474966	0.235248899254542	-3.51025	Endothelial_cells__POU2F1	POU2F1	Endothelial_cells
-0.901093	0.926531242990441	-2.79067	0.0275037020446597	0.235265480079859	-3.51134	Endothelial_cells__IL15RA	IL15RA	Endothelial_cells
-2.23478	0.572171688692771	-2.78975	0.0275395131377243	0.235329946453059	-3.51262	Endothelial_cells__YME1L1	YME1L1	Endothelial_cells
1.43823134866227	-4.24407	2.78849863569359	0.0275886692679754	0.235508199299856	-3.51439	Endothelial_cells__UBXN11	UBXN11	Endothelial_cells
1.98707057581287	0.877386293754737	2.78417974575484	0.027758521961255	0.236092426554964	-3.52046	Endothelial_cells__PDLIM7	PDLIM7	Endothelial_cells
0.970078300178073	0.942444535124214	2.78407088752073	0.0277628173205276	0.236092426554964	-3.52062	Endothelial_cells__WDR43	WDR43	Endothelial_cells
-1.06879	-0.434001	-2.78385	0.02777163620805	0.236092426554964	-3.52093	Endothelial_cells__SNX11	SNX11	Endothelial_cells
-2.18487	-7.7099	-2.78323	0.0277958945346324	0.236092426554964	-3.52179	Endothelial_cells__BCAT1	BCAT1	Endothelial_cells
-0.920777	-0.304596	-2.78316	0.0277989400485239	0.236092426554964	-3.5219	Endothelial_cells__GBP1	GBP1	Endothelial_cells
-0.929949	-0.50262	-2.78202	0.0278439536072896	0.236233665518319	-3.5235	Endothelial_cells__KDM6A	KDM6A	Endothelial_cells
1.13810710302195	0.283861037781998	2.78110503960633	0.027880114219839	0.236299583148391	-3.52479	Endothelial_cells__REXO4	REXO4	Endothelial_cells
-1.15912	2.53721369479644	-2.77977	0.0279330871523039	0.236336685879885	-3.52667	Endothelial_cells__SERPINB6	SERPINB6	Endothelial_cells
-0.980688	-0.629001	-2.77956	0.0279412830596908	0.236336685879885	-3.52696	Endothelial_cells__COX11	COX11	Endothelial_cells
1.07976013150935	0.976939333189861	2.77536447729225	0.0281086332095602	0.237510816449918	-3.53286	Endothelial_cells__PDCD11	PDCD11	Endothelial_cells
-1.33515	0.0746699481575988	-2.77199	0.0282436953205513	0.238410016382301	-3.53761	Endothelial_cells__IL13RA1	IL13RA1	Endothelial_cells
1.21149198450155	-0.609676	2.76813938339706	0.0283990528089641	0.239386348470822	-3.54303	Endothelial_cells__NRP2	NRP2	Endothelial_cells
-1.58528	-0.486141	-2.76739	0.0284292081521439	0.239386348470822	-3.54408	Endothelial_cells__FKBP5	FKBP5	Endothelial_cells
1.00660917906209	-1.71402	2.76674426967242	0.0284554934339302	0.239386348470822	-3.545	Endothelial_cells__MBD2	MBD2	Endothelial_cells
-1.05993	-0.762852	-2.76578	0.0284944563405813	0.239386348470822	-3.54635	Endothelial_cells__PGPEP1	PGPEP1	Endothelial_cells
1.83128059337441	1.85504869233468	2.7655680912039	0.0285031684890766	0.239386348470822	-3.54665	Endothelial_cells__PRAF2	PRAF2	Endothelial_cells
-1.16212	1.85968610518812	-2.76426	0.0285562574770177	0.239590454618164	-3.54849	Endothelial_cells__TAL1	TAL1	Endothelial_cells
0.948701237068827	0.496118017939554	2.76296359401807	0.0286090380331881	0.239615591358686	-3.55032	Endothelial_cells__SNAPC2	SNAPC2	Endothelial_cells
1.04713384229738	1.42324834948098	2.76266412540365	0.0286212375375132	0.239615591358686	-3.55074	Endothelial_cells__CHCHD10	CHCHD10	Endothelial_cells
1.96571485077098	-0.403646	2.76195193836195	0.0286502720022151	0.239615591358686	-3.55174	Endothelial_cells__KIFC3	KIFC3	Endothelial_cells
-2.08114	4.56315928626105	-2.76106	0.0286866150987666	0.239615591358686	-3.553	Endothelial_cells__STX11	STX11	Endothelial_cells
1.10479894547839	0.317450560347665	2.75906863174512	0.0287681356144892	0.239615591358686	-3.5558	Endothelial_cells__GARS	GARS	Endothelial_cells
1.19676128469393	-2.07187	2.75892550515477	0.0287739995985814	0.239615591358686	-3.556	Endothelial_cells__VDAC1	VDAC1	Endothelial_cells
-1.06205	0.696771005784347	-2.75891	0.028774511605306	0.239615591358686	-3.55602	Endothelial_cells__ZNF467	ZNF467	Endothelial_cells
-1.10441	0.813993114114941	-2.75855	0.0287895700298793	0.239615591358686	-3.55654	Endothelial_cells__BTN3A3	BTN3A3	Endothelial_cells
1.29434067399213	-0.641358	2.75584621813905	0.0289004646839708	0.240119882692502	-3.56034	Endothelial_cells__ASL	ASL	Endothelial_cells
-1.02227	-1.44554	-2.75485	0.0289413627094119	0.240119882692502	-3.56174	Endothelial_cells__BIN1	BIN1	Endothelial_cells
1.16257215979931	-0.016632	2.75460988697749	0.0289514045784434	0.240119882692502	-3.56208	Endothelial_cells__OXCT1	OXCT1	Endothelial_cells
1.35389359798734	0.0121338135074316	2.75409961946331	0.0289724563650217	0.240119882692502	-3.5628	Endothelial_cells__FHL3	FHL3	Endothelial_cells
2.33006279681347	-2.2505	2.75356788494137	0.0289944109222594	0.240119882692502	-3.56355	Endothelial_cells__NDUFS5	NDUFS5	Endothelial_cells
2.51989173808267	-0.158732	2.74912568949055	0.0291785074127403	0.241404291447553	-3.5698	Endothelial_cells__CCT4	CCT4	Endothelial_cells
2.00203295661834	-3.19253	2.74760138655657	0.0292419613330476	0.241687497459174	-3.57195	Endothelial_cells__PFDN5	PFDN5	Endothelial_cells
-1.04732	-0.990643	-2.74691	0.0292708155038865	0.241687497459174	-3.57293	Endothelial_cells__PICK1	PICK1	Endothelial_cells
1.40939921017813	-0.297316	2.74507485705818	0.0293474556159044	0.241999900675004	-3.57551	Endothelial_cells__GPSM1	GPSM1	Endothelial_cells
-1.22947	0.614014719627189	-2.74423	0.0293827833051315	0.241999900675004	-3.5767	Endothelial_cells__MYL12A	MYL12A	Endothelial_cells
-1.18448	-0.616476	-2.74331	0.0294214005087073	0.241999900675004	-3.578	Endothelial_cells__FAM221A	FAM221A	Endothelial_cells
-0.947563	0.133766240319163	-2.74301	0.0294341725500252	0.241999900675004	-3.57843	Endothelial_cells__C5ORF51	C5ORF51	Endothelial_cells
1.20400519208914	-0.327447	2.74207703655337	0.0294731473490898	0.241999900675004	-3.57973	Endothelial_cells__AP1S1	AP1S1	Endothelial_cells
1.31828499975083	1.19343452490488	2.74142238178237	0.0295006706709846	0.241999900675004	-3.58066	Endothelial_cells__PTMS	PTMS	Endothelial_cells
1.11811095449415	-2.03687	2.74114874583041	0.0295121830091468	0.241999900675004	-3.58104	Endothelial_cells__ATXN1	ATXN1	Endothelial_cells
-0.986809	0.025634838138598	-2.73717	0.0296799278972322	0.243135866032149	-3.58664	Endothelial_cells__ERCC3	ERCC3	Endothelial_cells
1.2624212426332	-1.28742	2.7354732936268	0.0297520259225197	0.243265363685768	-3.58904	Endothelial_cells__PAPOLA	PAPOLA	Endothelial_cells
-1.40957	-0.392969	-2.73501	0.0297717803846471	0.243265363685768	-3.5897	Endothelial_cells__VAV3	VAV3	Endothelial_cells
-1.25215	-1.01226	-2.73473	0.0297834201124351	0.243265363685768	-3.59008	Endothelial_cells__VPS50	VPS50	Endothelial_cells
1.23499321657581	1.70932159535705	2.73361462274856	0.0298310170051253	0.243348590680976	-3.59166	Endothelial_cells__TUSC1	TUSC1	Endothelial_cells
0.903462480850297	-0.802312	2.73311974128999	0.02985208591677	0.243348590680976	-3.59236	Endothelial_cells__NFKBID	NFKBID	Endothelial_cells
-1.43281	-1.61788	-2.73069	0.0299559294912871	0.243621128189936	-3.59579	Endothelial_cells__TMED7	TMED7	Endothelial_cells
1.16768924257378	-1.06328	2.73053470872198	0.0299623944089789	0.243621128189936	-3.596	Endothelial_cells__SFXN4	SFXN4	Endothelial_cells
1.22828765726727	0.0488409212020983	2.72909103210448	0.0300241850986745	0.243621128189936	-3.59804	Endothelial_cells__AIP	AIP	Endothelial_cells
-1.21806	-0.0398623	-2.72773	0.0300827085224942	0.243621128189936	-3.59996	Endothelial_cells__SAMD9	SAMD9	Endothelial_cells
1.57154877234123	0.0725580004694129	2.72680811191514	0.0301221693161027	0.243621128189936	-3.60125	Endothelial_cells__DYRK3	DYRK3	Endothelial_cells
1.63625862440801	-0.320468	2.72614730508508	0.0301505941056588	0.243621128189936	-3.60219	Endothelial_cells__SNX9	SNX9	Endothelial_cells
-0.986502	0.69443259447471	-2.72594	0.0301593793372216	0.243621128189936	-3.60247	Endothelial_cells__SHQ1	SHQ1	Endothelial_cells
1.58957305982435	-1.24349	2.72588619560183	0.0301618335605598	0.243621128189936	-3.60255	Endothelial_cells__TRMT112	TRMT112	Endothelial_cells
-1.0686	1.50690852904027	-2.72496	0.0302015384758579	0.243621128189936	-3.60385	Endothelial_cells__EFNB1	EFNB1	Endothelial_cells
-1.28774	1.56917130947202	-2.72382	0.0302508391975601	0.243621128189936	-3.60546	Endothelial_cells__RRAS	RRAS	Endothelial_cells
-0.96179	1.09702699228125	-2.72304	0.0302846928942747	0.243621128189936	-3.60657	Endothelial_cells__DENND5B	DENND5B	Endothelial_cells
-1.94489	-2.35007	-2.72303	0.0302852267688751	0.243621128189936	-3.60659	Endothelial_cells__CYB5A	CYB5A	Endothelial_cells
0.999283420486404	-0.37138	2.72262398389637	0.0303026266295683	0.243621128189936	-3.60715	Endothelial_cells__MZT2B	MZT2B	Endothelial_cells
1.2298963428138	-0.533636	2.72235473478913	0.0303142778588046	0.243621128189936	-3.60753	Endothelial_cells__SNUPN	SNUPN	Endothelial_cells
2.09419784914929	-1.3641	2.72156784283082	0.0303483560213497	0.243621128189936	-3.60864	Endothelial_cells__SLC8A1	SLC8A1	Endothelial_cells
1.09729198470954	-0.145756	2.72118131789705	0.0303651100894733	0.243621128189936	-3.60919	Endothelial_cells__NELFE	NELFE	Endothelial_cells
1.24210886977617	0.0290504946997682	2.72076600496653	0.0303831227996099	0.243621128189936	-3.60977	Endothelial_cells__NOMO1	NOMO1	Endothelial_cells
-1.07686	-0.214146	-2.71964	0.0304321900921959	0.243722095448588	-3.61137	Endothelial_cells__CAPN2	CAPN2	Endothelial_cells
1.16204490908405	-1.25586	2.71912786073799	0.0304542808202009	0.243722095448588	-3.61208	Endothelial_cells__DOT1L	DOT1L	Endothelial_cells
1.30137824902648	-2.04113	2.71557487491865	0.030609217547981	0.244525424937415	-3.61709	Endothelial_cells__YBX1	YBX1	Endothelial_cells
-2.14025	-1.15326	-2.71548	0.030613419774695	0.244525424937415	-3.61723	Endothelial_cells__AK9	AK9	Endothelial_cells
1.32593499591584	-1.47694	2.71380291062104	0.030686797205287	0.244604982300033	-3.61959	Endothelial_cells__STK17A	STK17A	Endothelial_cells
1.86084785515352	0.274374131246392	2.71345	0.0307022911506245	0.244604982300033	-3.62009	Endothelial_cells__SEMA4A	SEMA4A	Endothelial_cells
2.0441965591433	1.16672175419502	2.71303170700795	0.0307206262111412	0.244604982300033	-3.62068	Endothelial_cells__SNU13	SNU13	Endothelial_cells
1.64484845879064	2.81663633406662	2.71256912704727	0.0307409361391126	0.244604982300033	-3.62133	Endothelial_cells__LGALS9	LGALS9	Endothelial_cells
2.88471333327484	36.2921756141193	2.70979818311851	0.0308628917078146	0.245285712919365	-3.62524	Endothelial_cells__SAT1	SAT1	Endothelial_cells
0.937993534634029	1.8700049637312	2.70928736764797	0.0308854291889336	0.245285712919365	-3.62596	Endothelial_cells__SMAD1	SMAD1	Endothelial_cells
1.62721662741383	-0.112716	2.70815334193811	0.0309355247729752	0.245449354323615	-3.62756	Endothelial_cells__TRAP1	TRAP1	Endothelial_cells
-1.94326	2.12187212723287	-2.70614	0.0310245824909654	0.245772549312319	-3.6304	Endothelial_cells__ADIRF	ADIRF	Endothelial_cells
1.14660797250489	1.34761320820705	2.70580119411352	0.031039702676577	0.245772549312319	-3.63088	Endothelial_cells__TFAM	TFAM	Endothelial_cells
-1.10412	-0.539472	-2.70508	0.0310718585361255	0.245772549312319	-3.6319	Endothelial_cells__SIMC1	SIMC1	Endothelial_cells
0.908525609306713	0.081596555853321	2.70457007073947	0.0310943763577883	0.245772549312319	-3.63262	Endothelial_cells__LSM12	LSM12	Endothelial_cells
-0.941701	0.434712189748221	-2.70243	0.0311894729534226	0.245929027359535	-3.63563	Endothelial_cells__SECISBP2L	SECISBP2L	Endothelial_cells
1.08377399467849	0.17040929643846	2.70212774107714	0.0312031381805637	0.245929027359535	-3.63607	Endothelial_cells__EIF3E	EIF3E	Endothelial_cells
0.895661532286094	0.425496378357572	2.70165442875667	0.0312242618071297	0.245929027359535	-3.63673	Endothelial_cells__PPP4R2	PPP4R2	Endothelial_cells
-1.905	-1.01936	-2.70141	0.0312352551920972	0.245929027359535	-3.63708	Endothelial_cells__TMEM199	TMEM199	Endothelial_cells
-1.02892	-0.0493252	-2.70042	0.0312792023207494	0.245929027359535	-3.63847	Endothelial_cells__CDC14A	CDC14A	Endothelial_cells
1.23888786508502	0.0413864346228718	2.69990893967042	0.0313022915015989	0.245929027359535	-3.6392	Endothelial_cells__TUFM	TUFM	Endothelial_cells
1.17358356334879	-1.60661	2.69749373620981	0.0314105969958295	0.245929027359535	-3.6426	Endothelial_cells__HDLBP	HDLBP	Endothelial_cells
-0.963747	0.242514442802777	-2.69739	0.0314153155813343	0.245929027359535	-3.64275	Endothelial_cells__TMEM106B	TMEM106B	Endothelial_cells
1.15581368514177	0.293353517309571	2.69695101399213	0.0314349883922618	0.245929027359535	-3.64337	Endothelial_cells__UTP14A	UTP14A	Endothelial_cells
1.44608985014822	-4.90413	2.69668435726885	0.0314469799325782	0.245929027359535	-3.64375	Endothelial_cells__CLDN7	CLDN7	Endothelial_cells
-0.885105	0.880973086521647	-2.69583	0.0314856330407781	0.245929027359535	-3.64496	Endothelial_cells__RBMS2	RBMS2	Endothelial_cells
1.1820691551741	0.309875027477402	2.69505	0.031520695291306	0.245929027359535	-3.64606	Endothelial_cells__PSMG1	PSMG1	Endothelial_cells
1.7356314040684	1.05683906130472	2.69459555237408	0.0315410793599414	0.245929027359535	-3.64669	Endothelial_cells__HSPA8	HSPA8	Endothelial_cells
-1.01639	-0.70889	-2.69427	0.0315557246384711	0.245929027359535	-3.64715	Endothelial_cells__COX15	COX15	Endothelial_cells
-0.927753	0.509965062950802	-2.69396	0.031569928148546	0.245929027359535	-3.6476	Endothelial_cells__SLC35A3	SLC35A3	Endothelial_cells
-1.65372	0.104185529867934	-2.69358	0.0315869434395462	0.245929027359535	-3.64813	Endothelial_cells__CYP2U1	CYP2U1	Endothelial_cells
1.3122860634666	-1.01979	2.68891434145305	0.0317985	0.247344856074818	-3.65471	Endothelial_cells__UBE2R2	UBE2R2	Endothelial_cells
-1.14555	-0.9843	-2.68691	0.0318899877474268	0.247796592521214	-3.65755	Endothelial_cells__STX3	STX3	Endothelial_cells
-1.03427	0.388861791030239	-2.68633	0.0319161296627107	0.247796592521214	-3.65836	Endothelial_cells__MDC1	MDC1	Endothelial_cells
1.58304927434211	2.25721040701659	2.68568068077025	0.0319460169787837	0.247797483051646	-3.65928	Endothelial_cells__ADM5	ADM5	Endothelial_cells
-1.38902	-0.81945	-2.68465	0.0319933932499585	0.247850649612887	-3.66074	Endothelial_cells__ANAPC10	ANAPC10	Endothelial_cells
1.00327730667937	0.237502651897944	2.68412134143135	0.0320174039995797	0.247850649612887	-3.66148	Endothelial_cells__TFEB	TFEB	Endothelial_cells
-1.13229	8.19991225115002	-2.68335	0.0320527007060479	0.247850649612887	-3.66257	Endothelial_cells__ASAH1	ASAH1	Endothelial_cells
2.0720939381955	-0.0563266	2.6811257277552	0.0321550130886775	0.247850649612887	-3.66571	Endothelial_cells__TNFRSF10B	TNFRSF10B	Endothelial_cells
-0.95825	-0.858541	-2.68073	0.0321733854850532	0.247850649612887	-3.66627	Endothelial_cells__SLC11A2	SLC11A2	Endothelial_cells
1.01967562959748	0.411495601652655	2.68045711613918	0.0321858114380983	0.247850649612887	-3.66666	Endothelial_cells__OTUD4	OTUD4	Endothelial_cells
-0.995022	1.6490597102093	-2.68036	0.0321904631330708	0.247850649612887	-3.6668	Endothelial_cells__CDC42BPA	CDC42BPA	Endothelial_cells
-0.92431	-3.76593	-2.67977	0.0322175314645767	0.247850649612887	-3.66763	Endothelial_cells__DSE	DSE	Endothelial_cells
-1.36373	0.099960568392172	-2.67942	0.0322334777494051	0.247850649612887	-3.66811	Endothelial_cells__PANK4	PANK4	Endothelial_cells
-1.23948	-0.472631	-2.67905	0.0322506612436329	0.247850649612887	-3.66864	Endothelial_cells__GAPVD1	GAPVD1	Endothelial_cells
-1.10857	-1.93756	-2.67826	0.0322872176840944	0.247902687070773	-3.66976	Endothelial_cells__MEGF9	MEGF9	Endothelial_cells
-0.983357	-1.09701	-2.67706	0.0323428530231347	0.248069412695197	-3.67145	Endothelial_cells__LIN54	LIN54	Endothelial_cells
1.46049985214793	-0.397182	2.67584888851916	0.0323989223711623	0.248069412695197	-3.67316	Endothelial_cells__ACOT7	ACOT7	Endothelial_cells
1.09133483683771	-0.557224	2.67581122434715	0.0324006702506205	0.248069412695197	-3.67322	Endothelial_cells__C1ORF21	C1ORF21	Endothelial_cells
-1.11314	-0.570939	-2.67522	0.0324281534317403	0.248069412695197	-3.67405	Endothelial_cells__CBX7	CBX7	Endothelial_cells
1.32672734667769	3.27838563856781	2.67345269533617	0.0325103191842745	0.248469592810576	-3.67655	Endothelial_cells__MYADM	MYADM	Endothelial_cells
-0.88882	0.00791533635106921	-2.6715	0.0326015552337363	0.248938297440722	-3.67931	Endothelial_cells__KATNA1	KATNA1	Endothelial_cells
1.26872283923819	-0.962993	2.66826603355604	0.0327528170024738	0.249864065913464	-3.68387	Endothelial_cells__GDPD5	GDPD5	Endothelial_cells
1.51983867618628	-0.408583	2.66602816288834	0.0328580303014766	0.249913237056809	-3.68703	Endothelial_cells__PHB2	PHB2	Endothelial_cells
1.03192264900351	1.36402358142604	2.66551933091331	0.0328820022815155	0.249913237056809	-3.68775	Endothelial_cells__UGCG	UGCG	Endothelial_cells
0.988456095730597	-0.0952632	2.66526479448041	0.0328940008086121	0.249913237056809	-3.68811	Endothelial_cells__FAM126A	FAM126A	Endothelial_cells
-1.01234	0.506345608539607	-2.66462	0.0329245526875154	0.249913237056809	-3.68903	Endothelial_cells__SCARB1	SCARB1	Endothelial_cells
1.44656138368266	-0.0309373	2.66395502849763	0.0329558139682207	0.249913237056809	-3.68996	Endothelial_cells__INSR	INSR	Endothelial_cells
1.75696593469408	33.8676207533873	2.66369165321309	0.0329682583765564	0.249913237056809	-3.69034	Endothelial_cells__ARPC2	ARPC2	Endothelial_cells
-1.01019	0.827340873624731	-2.66367	0.032969450232894	0.249913237056809	-3.69037	Endothelial_cells__GBP4	GBP4	Endothelial_cells
-1.43354	-1.33574	-2.66069	0.0331104051971099	0.250753323435437	-3.69458	Endothelial_cells__RAB1A	RAB1A	Endothelial_cells
1.36737774444436	-2.41926	2.65694795688989	0.0332885753605169	0.250961917407102	-3.69986	Endothelial_cells__C11ORF49	C11ORF49	Endothelial_cells
1.04817851435321	-3.34311	2.65675037637431	0.0332980090966538	0.250961917407102	-3.70014	Endothelial_cells__CALM3	CALM3	Endothelial_cells
1.08926398960399	1.21206802777395	2.65656522273031	0.0333068520322474	0.250961917407102	-3.7004	Endothelial_cells__PAK1IP1	PAK1IP1	Endothelial_cells
-1.10932	0.857618588755019	-2.65653	0.0333086400842743	0.250961917407102	-3.70046	Endothelial_cells__PSMA3	PSMA3	Endothelial_cells
-0.927526	0.89872584667668	-2.65641	0.033314302344347	0.250961917407102	-3.70062	Endothelial_cells__SBDS	SBDS	Endothelial_cells
1.34080252176652	-0.668723	2.65462070084172	0.0333998707702522	0.250961917407102	-3.70315	Endothelial_cells__RCC1	RCC1	Endothelial_cells
-1.40199	-0.0320548	-2.65345	0.0334558583757701	0.250961917407102	-3.7048	Endothelial_cells__GPD1L	GPD1L	Endothelial_cells
0.912979989596664	2.0470349245858	2.65334441829532	0.0334610709643097	0.250961917407102	-3.70496	Endothelial_cells__C8ORF33	C8ORF33	Endothelial_cells
-1.39396	-1.55359	-2.65332	0.0334621025386867	0.250961917407102	-3.70499	Endothelial_cells__SLC15A3	SLC15A3	Endothelial_cells
1.40361123754522	4.03009669703056	2.65305832708285	0.0334748056592601	0.250961917407102	-3.70536	Endothelial_cells__TIMP2	TIMP2	Endothelial_cells
1.14480351141826	1.50633766910038	2.65278017290224	0.0334881649612915	0.250961917407102	-3.70575	Endothelial_cells__SURF6	SURF6	Endothelial_cells
1.04510817124649	-0.607089	2.65253837701882	0.033499782559088	0.250961917407102	-3.70609	Endothelial_cells__PTBP2	PTBP2	Endothelial_cells
-1.12865	-0.617931	-2.65163	0.033543622240997	0.25106435963293	-3.70738	Endothelial_cells__ORC3	ORC3	Endothelial_cells
-0.918803	-0.166626	-2.6506	0.0335932629362053	0.251068471089001	-3.70884	Endothelial_cells__TRIM65	TRIM65	Endothelial_cells
-0.980559	0.113611649310571	-2.64994	0.0336249535640202	0.251068471089001	-3.70977	Endothelial_cells__RHOBTB1	RHOBTB1	Endothelial_cells
1.2112180525125	0.0553771941819834	2.6497015712862	0.0336363979191644	0.251068471089001	-3.7101	Endothelial_cells__ACOX3	ACOX3	Endothelial_cells
0.86708383082484	-0.808992	2.64866492247035	0.0336864661493712	0.251068471089001	-3.71157	Endothelial_cells__THAP4	THAP4	Endothelial_cells
2.00448437412632	-4.32602	2.64848839898874	0.0336949996643535	0.251068471089001	-3.71182	Endothelial_cells__C12ORF75	C12ORF75	Endothelial_cells
-1.93742	-2.59029	-2.64747	0.0337442462408562	0.251210520091812	-3.71326	Endothelial_cells__CXCL1	CXCL1	Endothelial_cells
-1.26503	2.89535362754023	-2.64651	0.0337909958932413	0.251333743359649	-3.71462	Endothelial_cells__SH2D3C	SH2D3C	Endothelial_cells
0.953864918092145	-0.0479872	2.64385437658626	0.0339198277080758	0.252066719655638	-3.71837	Endothelial_cells__PIAS2	PIAS2	Endothelial_cells
1.71396281106379	-1.56412	2.63862661328563	0.0341753441932951	0.253738973881173	-3.72576	Endothelial_cells__SNRPD2	SNRPD2	Endothelial_cells
1.17359603861302	-1.68449	2.63780783299792	0.0342155452740858	0.253811036823722	-3.72692	Endothelial_cells__ARHGDIB	ARHGDIB	Endothelial_cells
-1.00849	0.258198826257302	-2.63619	0.0342953096845631	0.254176191010346	-3.72921	Endothelial_cells__SLF1	SLF1	Endothelial_cells
-1.16331	-0.527756	-2.63529	0.0343392619178629	0.254275513293926	-3.73047	Endothelial_cells__ULK4	ULK4	Endothelial_cells
2.55135533869218	-3.07705	2.63099967299556	0.0345517353679459	0.255621416415479	-3.73654	Endothelial_cells__GEM	GEM	Endothelial_cells
-1.32714	-0.763844	-2.62703	0.0347491568308994	0.256180769066819	-3.74215	Endothelial_cells__ZNF135	ZNF135	Endothelial_cells
1.0622032088688	-0.408902	2.62687251256864	0.0347572133749554	0.256180769066819	-3.74238	Endothelial_cells__BCORL1	BCORL1	Endothelial_cells
1.26375561239791	-1.58209	2.62667824076648	0.0347669169090988	0.256180769066819	-3.74265	Endothelial_cells__GSTK1	GSTK1	Endothelial_cells
1.03144885032741	-4.42162	2.62641568440277	0.0347800356285008	0.256180769066819	-3.74302	Endothelial_cells__SPINT1	SPINT1	Endothelial_cells
1.43809306213586	-1.95409	2.62639156494921	0.0347812410243308	0.256180769066819	-3.74306	Endothelial_cells__PGM1	PGM1	Endothelial_cells
-0.859411	-0.504165	-2.6249	0.0348559747448761	0.256504224404601	-3.74517	Endothelial_cells__TCAIM	TCAIM	Endothelial_cells
-0.988501	1.27688868858786	-2.62273	0.0349649850492002	0.256690367069899	-3.74824	Endothelial_cells__SERINC3	SERINC3	Endothelial_cells
1.12421670527042	-1.34081	2.62234171965982	0.0349842557911941	0.256690367069899	-3.74879	Endothelial_cells__C1ORF122	C1ORF122	Endothelial_cells
1.60369066251639	1.93438054866461	2.62204965538193	0.034998944394991	0.256690367069899	-3.7492	Endothelial_cells__RELL1	RELL1	Endothelial_cells
-1.13261	-0.114787	-2.62178	0.0350123402765166	0.256690367069899	-3.74958	Endothelial_cells__DCUN1D2	DCUN1D2	Endothelial_cells
-1.62833	-1.08272	-2.62065	0.0350694810706553	0.256690367069899	-3.75118	Endothelial_cells__ZNF445	ZNF445	Endothelial_cells
-1.39054	5.02861986078305	-2.61969	0.0351177016998245	0.256690367069899	-3.75253	Endothelial_cells__VAMP5	VAMP5	Endothelial_cells
1.65978563182842	0.121903384222688	2.61954379244745	0.0351252348498438	0.256690367069899	-3.75274	Endothelial_cells__SYNJ2	SYNJ2	Endothelial_cells
-0.93449	-0.695359	-2.61949	0.0351279980887438	0.256690367069899	-3.75282	Endothelial_cells__SLC33A1	SLC33A1	Endothelial_cells
0.957251302549143	-0.652241	2.61791605462673	0.0352075241277991	0.256789228589863	-3.75505	Endothelial_cells__SFXN3	SFXN3	Endothelial_cells
-1.2505	-0.885274	-2.61754	0.0352264365174205	0.256789228589863	-3.75557	Endothelial_cells__NAIP	NAIP	Endothelial_cells
0.939845337878819	-0.414154	2.61739148664605	0.0352340861527843	0.256789228589863	-3.75579	Endothelial_cells__PCED1A	PCED1A	Endothelial_cells
1.08483203532464	0.689982838457278	2.61397141877899	0.0354077777477963	0.257829338753201	-3.76063	Endothelial_cells__CLDN15	CLDN15	Endothelial_cells
-1.57616	0.768232776871484	-2.61211	0.0355025210352352	0.258146825646105	-3.76325	Endothelial_cells__ADRB1	ADRB1	Endothelial_cells
-0.90128	-1.15486	-2.61146	0.0355360010251623	0.258146825646105	-3.76418	Endothelial_cells__CHFR	CHFR	Endothelial_cells
1.52001661836657	0.592996822538382	2.61092622962537	0.0355631820638998	0.258146825646105	-3.76493	Endothelial_cells__HAPLN3	HAPLN3	Endothelial_cells
1.7880412225125	-2.67151	2.61068657119333	0.0355754426307921	0.258146825646105	-3.76527	Endothelial_cells__COX4I1	COX4I1	Endothelial_cells
-1.62693	-2.35031	-2.60754	0.0357368734439399	0.259011504014813	-3.76972	Endothelial_cells__PAG1	PAG1	Endothelial_cells
-0.97781	0.727344339466729	-2.60715	0.035756844660942	0.259011504014813	-3.77027	Endothelial_cells__HELZ2	HELZ2	Endothelial_cells
0.932442276727623	-0.0137094	2.60449997671525	0.0358934690189189	0.259311944086878	-3.77402	Endothelial_cells__SSBP4	SSBP4	Endothelial_cells
-1.02441	0.733772674192984	-2.6034	0.0359501406788359	0.259311944086878	-3.77558	Endothelial_cells__ARMC1	ARMC1	Endothelial_cells
1.62839573704696	-3.83199	2.60329087034787	0.0359559693383123	0.259311944086878	-3.77574	Endothelial_cells__RUNX1	RUNX1	Endothelial_cells
-0.850228	-1.21556	-2.60315	0.0359631892695228	0.259311944086878	-3.77593	Endothelial_cells__GAS2L3	GAS2L3	Endothelial_cells
-1.09018	0.306069121489445	-2.60292	0.0359752776370495	0.259311944086878	-3.77626	Endothelial_cells__RIN2	RIN2	Endothelial_cells
16.0047826999613	27.3620550782223	2.60177307338719	0.0360345868326882	0.259311944086878	-3.77788	Endothelial_cells__SCGB3A1	SCGB3A1	Endothelial_cells
0.900465524316705	1.39997834524808	2.60095921919398	0.036076815865699	0.259311944086878	-3.77903	Endothelial_cells__VGLL4	VGLL4	Endothelial_cells
-0.97221	0.352061014778012	-2.6008	0.036085135430888	0.259311944086878	-3.77926	Endothelial_cells__SLC44A1	SLC44A1	Endothelial_cells
-1.18466	-0.433442	-2.60054	0.0360988353246752	0.259311944086878	-3.77963	Endothelial_cells__FAM8A1	FAM8A1	Endothelial_cells
-1.11219	-0.83916	-2.59984	0.0361348069301987	0.259311944086878	-3.78061	Endothelial_cells__KBTBD7	KBTBD7	Endothelial_cells
-1.33747	-1.54889	-2.59972	0.0361410375033976	0.259311944086878	-3.78078	Endothelial_cells__TMEM243	TMEM243	Endothelial_cells
1.74945734745046	-1.81526	2.59869298057786	0.0361946776692048	0.259458561462262	-3.78224	Endothelial_cells__UXT	UXT	Endothelial_cells
1.42191821889637	-1.34659	2.59813383167105	0.0362238193462872	0.259458561462262	-3.78303	Endothelial_cells__DPM2	DPM2	Endothelial_cells
1.37855683029587	3.07004331438947	2.59648528900238	0.0363098802826947	0.259655725881966	-3.78536	Endothelial_cells__GSPT1	GSPT1	Endothelial_cells
0.983554516140243	3.39164835872358	2.5962601747102	0.0363216487201656	0.259655725881966	-3.78568	Endothelial_cells__MEF2C	MEF2C	Endothelial_cells
-1.24572	0.0986468727712158	-2.59581	0.036344938201669	0.259655725881966	-3.78631	Endothelial_cells__ZFP90	ZFP90	Endothelial_cells
0.902260048482793	-0.00620142	2.59461144973211	0.0364079612980764	0.259883	-3.78802	Endothelial_cells__PPTC7	PPTC7	Endothelial_cells
1.46349799704281	-1.35503	2.59220155989575	0.0365345061429778	0.260119324981531	-3.79143	Endothelial_cells__CRISPLD2	CRISPLD2	Endothelial_cells
0.926162394437282	4.23365023413857	2.59150379766068	0.0365712315142299	0.260119324981531	-3.79241	Endothelial_cells__DPP7	DPP7	Endothelial_cells
-1.09634	0.0371899166175344	-2.59074	0.0366115408494761	0.260119324981531	-3.7935	Endothelial_cells__HERC3	HERC3	Endothelial_cells
-1.5759	-0.0558768	-2.59037	0.0366312152903833	0.260119324981531	-3.79402	Endothelial_cells__TMEM123	TMEM123	Endothelial_cells
-1.06592	-0.142786	-2.58944	0.0366801908808373	0.260119324981531	-3.79534	Endothelial_cells__DSEL	DSEL	Endothelial_cells
-0.998843	1.74497269291637	-2.58938	0.0366831436700675	0.260119324981531	-3.79542	Endothelial_cells__DYNC1LI2	DYNC1LI2	Endothelial_cells
1.03895183084229	0.521898606013139	2.58901975828084	0.0367022864122513	0.260119324981531	-3.79593	Endothelial_cells__CNOT6L	CNOT6L	Endothelial_cells
1.44038191857068	-1.57175	2.58886655785595	0.0367103850697551	0.260119324981531	-3.79615	Endothelial_cells__ZNF267	ZNF267	Endothelial_cells
1.6081600826425	1.18445619689935	2.5886400849481	0.0367223605494772	0.260119324981531	-3.79647	Endothelial_cells__SLIRP	SLIRP	Endothelial_cells
-1.22074	0.847994437808609	-2.58737	0.0367896437872409	0.260374324184699	-3.79827	Endothelial_cells__PPA1	PPA1	Endothelial_cells
-1.11473	-0.265707	-2.58561	0.0368828665154143	0.26063107940865	-3.80075	Endothelial_cells__LIG4	LIG4	Endothelial_cells
1.17361862885917	-1.0919	2.58523392502187	0.0369029634548407	0.26063107940865	-3.80129	Endothelial_cells__TRMT1	TRMT1	Endothelial_cells
1.16581960335833	-0.299823	2.58491603705365	0.0369198657482636	0.26063107940865	-3.80174	Endothelial_cells__PTK7	PTK7	Endothelial_cells
-0.954777	-0.297768	-2.58136	0.0371093855881597	0.261702951055818	-3.80677	Endothelial_cells__SLC27A3	SLC27A3	Endothelial_cells
1.23267044309239	0.237334251033527	2.57990462680192	0.0371873926020528	0.261702951055818	-3.80883	Endothelial_cells__SMARCC1	SMARCC1	Endothelial_cells
2.0158497389301	-0.380288	2.57968469719981	0.0371991793243465	0.261702951055818	-3.80914	Endothelial_cells__SLC7A1	SLC7A1	Endothelial_cells
1.28693786861349	-1.3801	2.57955121483977	0.037206334961052	0.261702951055818	-3.80933	Endothelial_cells__GAMT	GAMT	Endothelial_cells
-0.941583	-2.33856	-2.57909	0.0372312511329842	0.261702951055818	-3.80999	Endothelial_cells__SIRPA	SIRPA	Endothelial_cells
-1.08057	-2.12138	-2.57854	0.0372603624896245	0.261702951055818	-3.81076	Endothelial_cells__C17ORF58	C17ORF58	Endothelial_cells
-2.2656	-1.41459	-2.57668	0.0373607522964956	0.262057959734345	-3.8134	Endothelial_cells__TPD52	TPD52	Endothelial_cells
1.18047827746709	-1.6033	2.57643342502293	0.03737387939501	0.262057959734345	-3.81374	Endothelial_cells__COX7A2L	COX7A2L	Endothelial_cells
0.879438239837606	-1.16555	2.57505000308733	0.0374484731986137	0.262109718304472	-3.8157	Endothelial_cells__NHSL2	NHSL2	Endothelial_cells
1.06273523480679	0.702737949272159	2.57462678074165	0.0374713241723307	0.262109718304472	-3.8163	Endothelial_cells__POLR3D	POLR3D	Endothelial_cells
1.33422899500066	-0.920292	2.57412116371661	0.0374986428809517	0.262109718304472	-3.81702	Endothelial_cells__DBF4	DBF4	Endothelial_cells
1.05439379999959	0.740519413123734	2.57396231345859	0.0375072299051575	0.262109718304472	-3.81724	Endothelial_cells__HSPH1	HSPH1	Endothelial_cells
-1.14512	0.00930776964763638	-2.5716	0.037635237233866	0.262783623739486	-3.82059	Endothelial_cells__NR3C1	NR3C1	Endothelial_cells
-1.54193	-0.466077	-2.57069	0.0376844727138052	0.262863994560555	-3.82187	Endothelial_cells__CCDC186	CCDC186	Endothelial_cells
-1.19416	3.15512437014401	-2.57022	0.0377099134332935	0.262863994560555	-3.82253	Endothelial_cells__PPFIBP1	PPFIBP1	Endothelial_cells
1.46818135710193	1.77539781209216	2.56805150604248	0.0378282104691343	0.263419730610225	-3.82561	Endothelial_cells__HSPG2	HSPG2	Endothelial_cells
1.16052478134552	2.68544769879897	2.56737961142471	0.0378648773864582	0.263419730610225	-3.82656	Endothelial_cells__RRBP1	RRBP1	Endothelial_cells
1.40604558031791	1.03876654613532	2.56701872665551	0.0378845869927237	0.263419730610225	-3.82707	Endothelial_cells__NIFK	NIFK	Endothelial_cells
-0.904065	-0.794026	-2.56442	0.0380270157604225	0.264189359076792	-3.83076	Endothelial_cells__PCMT1	PCMT1	Endothelial_cells
-1.48338	-0.399299	-2.56222	0.0381478319570275	0.264807677546572	-3.83387	Endothelial_cells__IFIT3	IFIT3	Endothelial_cells
-1.506	-3.03769	-2.56081	0.0382254512520103	0.265125358975402	-3.83586	Endothelial_cells__PARP8	PARP8	Endothelial_cells
1.00835405305682	-0.775114	2.55932175967517	0.0383075030792206	0.265473229082725	-3.83797	Endothelial_cells__VKORC1	VKORC1	Endothelial_cells
1.76927948260276	0.185195439822267	2.55844537163269	0.0383559670681311	0.265587948342808	-3.83921	Endothelial_cells__RRS1	RRS1	Endothelial_cells
0.956033489803849	1.14217773745672	2.55623001370731	0.0384787599169047	0.266027206313139	-3.84235	Endothelial_cells__MON1A	MON1A	Endothelial_cells
0.93045561039345	-0.675174	2.5561477029582	0.0384833300974431	0.266027206313139	-3.84246	Endothelial_cells__ZDHHC8	ZDHHC8	Endothelial_cells
1.52022851119824	0.817590714167377	2.55070108605756	0.038787001792073	0.267564564684497	-3.85018	Endothelial_cells__WDR4	WDR4	Endothelial_cells
1.00557242256146	0.155171562342581	2.55069388361575	0.0387874050018325	0.267564564684497	-3.85019	Endothelial_cells__NSA2	NSA2	Endothelial_cells
1.13984562160736	0.476251640264957	2.55043026066286	0.038802166235034	0.267564564684497	-3.85056	Endothelial_cells__POLR2H	POLR2H	Endothelial_cells
1.6683723904997	0.231319869333438	2.5491938054473	0.0388714778590692	0.267577208630352	-3.85231	Endothelial_cells__HSPE1	HSPE1	Endothelial_cells
-0.974151	-0.82132	-2.54903	0.0388804906591891	0.267577208630352	-3.85254	Endothelial_cells__MTMR10	MTMR10	Endothelial_cells
-0.971188	-0.0601018	-2.54868	0.0389004472477142	0.267577208630352	-3.85304	Endothelial_cells__VPS37A	VPS37A	Endothelial_cells
-1.03264	-0.895796	-2.5468	0.0390058004379592	0.267829135361044	-3.85569	Endothelial_cells__CMTM6	CMTM6	Endothelial_cells
-1.01688	-0.0832382	-2.5462	0.0390400481505206	0.267829135361044	-3.85655	Endothelial_cells__CYP20A1	CYP20A1	Endothelial_cells
1.94295541099153	0.775009279127548	2.54610263955158	0.0390453214704323	0.267829135361044	-3.85669	Endothelial_cells__NHP2	NHP2	Endothelial_cells
-0.876102	-0.528555	-2.54509	0.0391027209924313	0.267829135361044	-3.85813	Endothelial_cells__AUTS2	AUTS2	Endothelial_cells
0.958413170825023	-0.488742	2.54408455411251	0.0391592515766377	0.267829135361044	-3.85954	Endothelial_cells__SPRED1	SPRED1	Endothelial_cells
1.19727132111832	0.51080080766499	2.54370514536754	0.0391807094340607	0.267829135361044	-3.86008	Endothelial_cells__AVEN	AVEN	Endothelial_cells
-1.20387	1.93574824474078	-2.5435	0.0391922371474963	0.267829135361044	-3.86037	Endothelial_cells__FRY	FRY	Endothelial_cells
-1.72031	-0.507727	-2.54346	0.0391945076138113	0.267829135361044	-3.86043	Endothelial_cells__IFIT2	IFIT2	Endothelial_cells
0.928574032354776	3.17594953246174	2.53939513823761	0.0394253248432895	0.269185380369728	-3.86619	Endothelial_cells__ATP1B3	ATP1B3	Endothelial_cells
0.966323539338694	-3.36954	2.53643132393939	0.0395944559265649	0.270118571046557	-3.87038	Endothelial_cells__AKR1A1	AKR1A1	Endothelial_cells
-0.866101	0.506086848612148	-2.53498	0.0396774675877293	0.270463196341254	-3.87244	Endothelial_cells__SYNJ1	SYNJ1	Endothelial_cells
-0.911523	1.28066740573448	-2.53338	0.0397691669023821	0.270776038300405	-3.8747	Endothelial_cells__VAMP3	VAMP3	Endothelial_cells
-1.07326	-0.293576	-2.53237	0.039827432418728	0.270776038300405	-3.87613	Endothelial_cells__DPYD	DPYD	Endothelial_cells
1.41867683744946	-0.797543	2.53187695684165	0.039855820897024	0.270776038300405	-3.87683	Endothelial_cells__PRR5	PRR5	Endothelial_cells
1.06334382944213	-1.08533	2.53187440538249	0.0398559678200632	0.270776038300405	-3.87684	Endothelial_cells__SIGMAR1	SIGMAR1	Endothelial_cells
0.826921921032566	0.179335125433736	2.53135256181883	0.0398860294312503	0.270776038300405	-3.87758	Endothelial_cells__WIZ	WIZ	Endothelial_cells
0.854397468828044	-0.182374	2.53059391923385	0.0399297741670789	0.270848246620121	-3.87865	Endothelial_cells__ZCCHC3	ZCCHC3	Endothelial_cells
2.35990169376537	-1.15617	2.52937042970786	0.0400004276891159	0.270848246620121	-3.88038	Endothelial_cells__NANS	NANS	Endothelial_cells
-1.01081	-0.40243	-2.52918	0.0400114393796494	0.270848246620121	-3.88065	Endothelial_cells__PHKB	PHKB	Endothelial_cells
0.928591252890938	0.433189843102202	2.5289137251367	0.04002683447588	0.270848246620121	-3.88103	Endothelial_cells__PNN	PNN	Endothelial_cells
-0.858447	-0.704794	-2.52813	0.0400720091400942	0.270855970454344	-3.88214	Endothelial_cells__LASP1	LASP1	Endothelial_cells
1.29756895833011	-1.88244	2.52776969386756	0.0400930620689357	0.270855970454344	-3.88265	Endothelial_cells__UFC1	UFC1	Endothelial_cells
-0.867638	-1.03464	-2.52536	0.0402327304278222	0.271378096104706	-3.88606	Endothelial_cells__RECK	RECK	Endothelial_cells
-1.09668	-0.382614	-2.52531	0.040235560566287	0.271378096104706	-3.88613	Endothelial_cells__MANEA	MANEA	Endothelial_cells
1.49420000683105	-2.68979	2.52430510894717	0.0402943196247596	0.27139061314208	-3.88756	Endothelial_cells__FAM162A	FAM162A	Endothelial_cells
-1.46687	-0.915449	-2.52416	0.0403026310036779	0.27139061314208	-3.88776	Endothelial_cells__MYEF2	MYEF2	Endothelial_cells
0.899706752007713	0.222704520465161	2.5215176519197	0.0404570029736755	0.271941450708807	-3.8915	Endothelial_cells__YWHAG	YWHAG	Endothelial_cells
1.13737760733919	1.25675631329244	2.52089297474195	0.0404935540668023	0.271941450708807	-3.89239	Endothelial_cells__HNRNPM	HNRNPM	Endothelial_cells
1.33288531296556	0.52974419459905	2.52075927616229	0.0405013814795501	0.271941450708807	-3.89258	Endothelial_cells__SNRPE	SNRPE	Endothelial_cells
0.842400040348439	-0.519095	2.52052456272136	0.0405151266224824	0.271941450708807	-3.89291	Endothelial_cells__COL6A1	COL6A1	Endothelial_cells
-1.09722	-0.604856	-2.51478	0.0408528352063836	0.273961349468771	-3.90104	Endothelial_cells__ATAD1	ATAD1	Endothelial_cells
2.07501291360976	0.343041598463437	2.51429191265867	0.0408818930722352	0.273961349468771	-3.90174	Endothelial_cells__MLF1	MLF1	Endothelial_cells
-1.43397	-0.411931	-2.51337	0.0409362775835869	0.274105099218177	-3.90304	Endothelial_cells__PDE3B	PDE3B	Endothelial_cells
-0.98606	2.5176005328425	-2.51111	0.0410707168069367	0.274650287843851	-3.90625	Endothelial_cells__SPTBN1	SPTBN1	Endothelial_cells
-1.93846	-2.27602	-2.51089	0.0410836967878883	0.274650287843851	-3.90656	Endothelial_cells__ABHD10	ABHD10	Endothelial_cells
1.04498207030552	-1.08809	2.50948130611897	0.0411673288925809	0.274988505917296	-3.90855	Endothelial_cells__PDE4D	PDE4D	Endothelial_cells
0.987031389549508	-0.558484	2.50872484786364	0.0412124005533866	0.274998719840444	-3.90962	Endothelial_cells__RPP25	RPP25	Endothelial_cells
-1.08886	-2.00711	-2.50835	0.0412349396084193	0.274998719840444	-3.91016	Endothelial_cells__SOBP	SOBP	Endothelial_cells
0.959369452588067	-0.66733	2.50723256933241	0.0413014641033459	0.275194138709212	-3.91174	Endothelial_cells__TTYH3	TTYH3	Endothelial_cells
0.869585688359717	0.176592153387513	2.50674895326367	0.0413303704657593	0.275194138709212	-3.91242	Endothelial_cells__TRUB2	TRUB2	Endothelial_cells
-1.03146	2.82703987882557	-2.5049	0.0414410274566611	0.275246950597684	-3.91504	Endothelial_cells__KALRN	KALRN	Endothelial_cells
-1.17005	-2.1729	-2.50463	0.0414572534989394	0.275246950597684	-3.91542	Endothelial_cells__IQSEC1	IQSEC1	Endothelial_cells
0.98502870942905	-2.85996	2.50424911377613	0.0414801234483917	0.275246950597684	-3.91596	Endothelial_cells__CREM	CREM	Endothelial_cells
0.934317714926477	-0.4353	2.50367950806075	0.0415143242114051	0.275246950597684	-3.91677	Endothelial_cells__E2F3	E2F3	Endothelial_cells
1.45469282024465	5.41801075845606	2.50278899227939	0.041567851838496	0.275246950597684	-3.91803	Endothelial_cells__IER3	IER3	Endothelial_cells
0.89796075084169	0.622923705084713	2.50240309698024	0.0415910696335369	0.275246950597684	-3.91858	Endothelial_cells__SLC38A2	SLC38A2	Endothelial_cells
-1.08635	-2.08966	-2.50189	0.0416217998569374	0.275246950597684	-3.9193	Endothelial_cells__LAMTOR3	LAMTOR3	Endothelial_cells
0.907545914021357	-1.24956	2.50165625662721	0.0416360422011759	0.275246950597684	-3.91964	Endothelial_cells__BCL2L11	BCL2L11	Endothelial_cells
1.17700617936378	1.78211904216091	2.50137938347202	0.0416527274882919	0.275246950597684	-3.92003	Endothelial_cells__CFAP97	CFAP97	Endothelial_cells
-0.90404	-0.381799	-2.50045	0.0417088813118018	0.275246950597684	-3.92135	Endothelial_cells__RNF185	RNF185	Endothelial_cells
1.82323882357794	1.8690981629095	2.50037326382751	0.0417134178559146	0.275246950597684	-3.92145	Endothelial_cells__HTRA1	HTRA1	Endothelial_cells
-1.06225	5.76316591292685	-2.49991	0.0417411310201187	0.275246950597684	-3.9221	Endothelial_cells__ID2	ID2	Endothelial_cells
1.23023750410387	-1.84209	2.49936476457722	0.0417743436114862	0.275246950597684	-3.92288	Endothelial_cells__COX7C	COX7C	Endothelial_cells
1.28355913395682	0.261257298000178	2.49847681232165	0.041828063080613	0.275246950597684	-3.92414	Endothelial_cells__CARNMT1	CARNMT1	Endothelial_cells
-1.32283	-1.95864	-2.49837	0.0418343617092479	0.275246950597684	-3.92429	Endothelial_cells__GTDC1	GTDC1	Endothelial_cells
-4.75753	-2.02981	-2.49666	0.0419383948323588	0.275713475663287	-3.92672	Endothelial_cells__GCOM1	GCOM1	Endothelial_cells
-0.983025	-0.238318	-2.49592	0.041982930433251	0.275788421464837	-3.92776	Endothelial_cells__ITFG1	ITFG1	Endothelial_cells
-1.00887	1.73981700824461	-2.49401	0.0420993328419105	0.276147938237383	-3.93047	Endothelial_cells__MCC	MCC	Endothelial_cells
1.89538654940336	-0.204511	2.49393397107627	0.0421040170158884	0.276147938237383	-3.93058	Endothelial_cells__EDC3	EDC3	Endothelial_cells
-1.92761	-0.0393532	-2.49338	0.0421376113135774	0.276150660600712	-3.93136	Endothelial_cells__CALCOCO2	CALCOCO2	Endothelial_cells
0.99216224395075	-0.584725	2.49157412845888	0.0422481077807453	0.276504589755533	-3.93392	Endothelial_cells__MCU	MCU	Endothelial_cells
-1.362	-0.370739	-2.4914	0.0422584909908013	0.276504589755533	-3.93416	Endothelial_cells__FAM111A	FAM111A	Endothelial_cells
-0.964502	-0.635308	-2.49087	0.0422912823211334	0.276504589755533	-3.93492	Endothelial_cells__AGO4	AGO4	Endothelial_cells
-1.62947	-0.496099	-2.48904	0.0424032621285271	0.276741514211881	-3.9375	Endothelial_cells__PKIA	PKIA	Endothelial_cells
-0.88044	0.251810419429284	-2.48892	0.042410493593193	0.276741514211881	-3.93767	Endothelial_cells__BIVM	BIVM	Endothelial_cells
-1.03217	1.57147418387871	-2.48818	0.0424563521540571	0.276741514211881	-3.93873	Endothelial_cells__GINM1	GINM1	Endothelial_cells
1.04074591892556	-1.07492	2.48763760809246	0.0424896056959195	0.276741514211881	-3.93949	Endothelial_cells__GOLT1B	GOLT1B	Endothelial_cells
0.933625727825178	-1.10792	2.48756991668097	0.0424937708954444	0.276741514211881	-3.93959	Endothelial_cells__SEC24D	SEC24D	Endothelial_cells
-1.51122	-0.523854	-2.48653	0.0425580560527711	0.276799345218325	-3.94107	Endothelial_cells__TBK1	TBK1	Endothelial_cells
0.931656751589979	1.27978467288575	2.48634581873928	0.0425691651903707	0.276799345218325	-3.94132	Endothelial_cells__PRRC2C	PRRC2C	Endothelial_cells
-1.44802	-1.39659	-2.48557	0.0426169444090755	0.276893698920168	-3.94242	Endothelial_cells__RNF146	RNF146	Endothelial_cells
1.02188024279417	0.18496362271754	2.48470274959019	0.0426705821124466	0.277025939876671	-3.94365	Endothelial_cells__NKRF	NKRF	Endothelial_cells
-0.916005	1.59558057495843	-2.48413	0.0427062524334148	0.277041417773431	-3.94447	Endothelial_cells__GIMAP5	GIMAP5	Endothelial_cells
-1.17376	-1.01201	-2.48315	0.0427665805954086	0.277109924131463	-3.94585	Endothelial_cells__NUDT16L1	NUDT16L1	Endothelial_cells
-1.11827	-1.22075	-2.48288	0.0427834017192034	0.277109924131463	-3.94623	Endothelial_cells__DYM	DYM	Endothelial_cells
-1.0347	0.169228669470622	-2.48166	0.0428591874140052	0.277349272433049	-3.94797	Endothelial_cells__HPCAL1	HPCAL1	Endothelial_cells
-1.20538	-0.81015	-2.48121	0.0428870015164405	0.277349272433049	-3.9486	Endothelial_cells__SLC2A13	SLC2A13	Endothelial_cells
-1.1788	-0.413878	-2.4789	0.043030590702517	0.278037245173191	-3.95187	Endothelial_cells__CEP120	CEP120	Endothelial_cells
1.52779266405809	0.637120814720291	2.47839753267953	0.0430620897416418	0.278037245173191	-3.95258	Endothelial_cells__GNB1L	GNB1L	Endothelial_cells
-1.1387	-0.187265	-2.47789	0.0430936016188173	0.278037245173191	-3.9533	Endothelial_cells__PCNA	PCNA	Endothelial_cells
-1.55044	-1.11876	-2.47487	0.0432827455564229	0.279041279059727	-3.95758	Endothelial_cells__PLEKHA2	PLEKHA2	Endothelial_cells
1.00461088158913	-0.162853	2.47367158019447	0.0433579692716878	0.279294668596125	-3.95928	Endothelial_cells__EFTUD2	EFTUD2	Endothelial_cells
-1.61327	0.143194873789368	-2.47284	0.0434099405164174	0.279294668596125	-3.96045	Endothelial_cells__IRF2	IRF2	Endothelial_cells
1.69330847754305	1.05835633654214	2.47126024368794	0.0435097451391473	0.279294668596125	-3.96269	Endothelial_cells__MYL9	MYL9	Endothelial_cells
-1.28094	-0.987641	-2.47117	0.0435156097539251	0.279294668596125	-3.96283	Endothelial_cells__DDX60L	DDX60L	Endothelial_cells
-0.912248	5.1094456334052	-2.47086	0.0435349491187979	0.279294668596125	-3.96326	Endothelial_cells__LAMP2	LAMP2	Endothelial_cells
-0.936017	0.302560779415821	-2.47063	0.0435492031576846	0.279294668596125	-3.96358	Endothelial_cells__MAVS	MAVS	Endothelial_cells
-1.16746	-1.37123	-2.47051	0.0435569481962959	0.279294668596125	-3.96375	Endothelial_cells__TMEM129	TMEM129	Endothelial_cells
0.894183962207532	0.484127492341351	2.46933327533058	0.0436314280208812	0.279497729169884	-3.96542	Endothelial_cells__STRN4	STRN4	Endothelial_cells
0.888412629234655	-1.96166	2.46894832140054	0.0436557789163582	0.279497729169884	-3.96597	Endothelial_cells__CYTH1	CYTH1	Endothelial_cells
-0.924387	0.290992365168003	-2.46836	0.0436931962010393	0.279522269009416	-3.96681	Endothelial_cells__CAMK1	CAMK1	Endothelial_cells
0.848061873463567	0.444739020145912	2.46609155630243	0.0438369273632177	0.280224342543538	-3.97002	Endothelial_cells__SYMPK	SYMPK	Endothelial_cells
-0.80986	-0.393198	-2.46557	0.0438702773440141	0.280224342543538	-3.97076	Endothelial_cells__WDPCP	WDPCP	Endothelial_cells
-1.25297	-0.135866	-2.46483	0.0439171407704156	0.280308560300743	-3.9718	Endothelial_cells__CPEB3	CPEB3	Endothelial_cells
-1.19277	-2.95455	-2.46332	0.0440133829870678	0.280520999867894	-3.97394	Endothelial_cells__RNFT1	RNFT1	Endothelial_cells
-1.0619	-0.353986	-2.46322	0.0440201023706767	0.280520999867894	-3.97409	Endothelial_cells__ATP2A3	ATP2A3	Endothelial_cells
1.12352950323278	-0.913394	2.46202408438545	0.0440961872206254	0.280520999867894	-3.97578	Endothelial_cells__HCFC1R1	HCFC1R1	Endothelial_cells
1.3572140642456	-0.703469	2.46169673586889	0.0441171210463622	0.280520999867894	-3.97624	Endothelial_cells__CHST7	CHST7	Endothelial_cells
-1.25506	-6.85408	-2.46167	0.0441189461524778	0.280520999867894	-3.97628	Endothelial_cells__VAMP8	VAMP8	Endothelial_cells
1.26447425619831	-0.841383	2.4592365232087	0.0442747793815936	0.281209036976606	-3.97972	Endothelial_cells__ZDHHC1	ZDHHC1	Endothelial_cells
-2.1913	0.361156525984494	-2.4588	0.0443031201342003	0.281209036976606	-3.98035	Endothelial_cells__USP47	USP47	Endothelial_cells
-1.10033	-1.72681	-2.45692	0.0444239621654605	0.281209036976606	-3.98301	Endothelial_cells__LYST	LYST	Endothelial_cells
1.01486787011475	-0.620479	2.45689529095896	0.0444253530137106	0.281209036976606	-3.98304	Endothelial_cells__MPZL1	MPZL1	Endothelial_cells
0.920429259516469	-1.10349	2.45684593650609	0.0444285328686293	0.281209036976606	-3.98311	Endothelial_cells__APOO	APOO	Endothelial_cells
-0.817231	-1.53738	-2.45629	0.0444641614749501	0.281209036976606	-3.98389	Endothelial_cells__NDUFV3	NDUFV3	Endothelial_cells
-1.22833	-0.0725646	-2.45579	0.0444964769606798	0.281209036976606	-3.9846	Endothelial_cells__ADRB2	ADRB2	Endothelial_cells
-1.12578	-0.459309	-2.4554	0.0445216248806206	0.281209036976606	-3.98516	Endothelial_cells__LIN7B	LIN7B	Endothelial_cells
-0.916286	-0.321945	-2.45494	0.0445512698389447	0.281209036976606	-3.98581	Endothelial_cells__SLC38A9	SLC38A9	Endothelial_cells
-0.933884	-0.818824	-2.45406	0.0446081665089936	0.281209036976606	-3.98705	Endothelial_cells__SH3YL1	SH3YL1	Endothelial_cells
0.79178374623401	0.480734414015474	2.45406318595062	0.0446082029364365	0.281209036976606	-3.98705	Endothelial_cells__CSNK1E	CSNK1E	Endothelial_cells
-1.12247	-0.876838	-2.45361	0.0446377585407988	0.281209036976606	-3.9877	Endothelial_cells__CYP4V2	CYP4V2	Endothelial_cells
-0.984559	-1.11512	-2.45278	0.0446912389701948	0.281209036976606	-3.98887	Endothelial_cells__TMEM126B	TMEM126B	Endothelial_cells
-1.17271	-0.00703655	-2.45264	0.0447001749273158	0.281209036976606	-3.98906	Endothelial_cells__ZBTB5	ZBTB5	Endothelial_cells
1.32107186955243	-1.57273	2.4517438246516	0.0447585266208621	0.281363456998063	-3.99034	Endothelial_cells__CLNS1A	CLNS1A	Endothelial_cells
-1.00058	-0.053796	-2.45118	0.0447952332938177	0.281381680531657	-3.99114	Endothelial_cells__SMIM8	SMIM8	Endothelial_cells
0.896299928879108	0.323936134485937	2.4499324005226	0.0448762929280688	0.281620220279199	-3.9929	Endothelial_cells__MCAT	MCAT	Endothelial_cells
0.88792996115463	0.0198160135077211	2.44955481787035	0.044900880969662	0.281620220279199	-3.99344	Endothelial_cells__ORAI1	ORAI1	Endothelial_cells
0.883772866151929	0.207617798311272	2.44837543667677	0.0449777713374226	0.281742348731025	-3.99511	Endothelial_cells__ATAT1	ATAT1	Endothelial_cells
-0.844251	0.613690253993196	-2.44822	0.0449880549637789	0.281742348731025	-3.99533	Endothelial_cells__CSPP1	CSPP1	Endothelial_cells
1.26340603447869	0.113536714734516	2.44724225208965	0.0450517777952517	0.281929283150286	-3.99671	Endothelial_cells__ABL1	ABL1	Endothelial_cells
1.19422277476313	0.010310151087328	2.44616902455653	0.0451219843203324	0.282156480464408	-3.99823	Endothelial_cells__TSHZ3	TSHZ3	Endothelial_cells
-1.53431	1.53691233233192	-2.44479	0.0452121773354709	0.282508222194538	-4.00018	Endothelial_cells__IRF1	IRF1	Endothelial_cells
-1.36042	1.26811	-2.44405	0.0452609629240657	0.282555545278068	-4.00124	Endothelial_cells__NFKBIZ	NFKBIZ	Endothelial_cells
-5.03476	-3.79427	-2.44364	0.0452876483720945	0.282555545278068	-4.00181	Endothelial_cells__POF1B	POF1B	Endothelial_cells
-1.12455	1.6436066147538	-2.44248	0.0453640186535411	0.282797035122087	-4.00346	Endothelial_cells__F2RL3	F2RL3	Endothelial_cells
-1.37078	-0.631279	-2.44202	0.0453943096146952	0.282797035122087	-4.00411	Endothelial_cells__JKAMP	JKAMP	Endothelial_cells
-1.23014	-1.09853	-2.43977	0.0455427723805692	0.283285275193189	-4.00729	Endothelial_cells__MICU2	MICU2	Endothelial_cells
-0.988269	2.72197281528295	-2.43962	0.0455531402590593	0.283285275193189	-4.00752	Endothelial_cells__HECW2	HECW2	Endothelial_cells
-0.804028	-0.855903	-2.4392	0.0455803230710879	0.283285275193189	-4.0081	Endothelial_cells__BPGM	BPGM	Endothelial_cells
-0.814752	0.602997220930598	-2.43867	0.045615416290346	0.283285275193189	-4.00885	Endothelial_cells__UBA5	UBA5	Endothelial_cells
-0.8741	-0.233137	-2.43826	0.0456428636349953	0.283285275193189	-4.00944	Endothelial_cells__PARD3	PARD3	Endothelial_cells
0.918082158860305	0.709646813648098	2.43730629702843	0.0457060792172841	0.283466242418372	-4.01079	Endothelial_cells__NT5E	NT5E	Endothelial_cells
1.02352161442865	-0.951792	2.43487132468538	0.0458679156080382	0.28425812479948	-4.01423	Endothelial_cells__ATP8B2	ATP8B2	Endothelial_cells
-1.29847	-1.70376	-2.43285	0.0460027883606631	0.284776334605132	-4.0171	Endothelial_cells__KIAA0825	KIAA0825	Endothelial_cells
1.36081458070425	1.44527929575306	2.43206447066574	0.0460552011176173	0.284776334605132	-4.01821	Endothelial_cells__PNO1	PNO1	Endothelial_cells
-1.30492	-2.91781	-2.43197	0.0460616262031591	0.284776334605132	-4.01835	Endothelial_cells__MAN2A2	MAN2A2	Endothelial_cells
-0.949522	-1.09078	-2.43157	0.0460883963370314	0.284776334605132	-4.01891	Endothelial_cells__NQO2	NQO2	Endothelial_cells
-0.904289	0.353954086009974	-2.43074	0.0461441366220118	0.284909235241101	-4.02009	Endothelial_cells__NHLRC2	NHLRC2	Endothelial_cells
-1.1248	1.09764765297544	-2.42961	0.0462195875731181	0.28516354882955	-4.02168	Endothelial_cells__SFR1	SFR1	Endothelial_cells
1.36604815613112	1.72328249084776	2.42673417383635	0.0464130326307676	0.285790769644725	-4.02576	Endothelial_cells__DBN1	DBN1	Endothelial_cells
1.05864125183716	-2.13869	2.42627887202711	0.0464437301838075	0.285790769644725	-4.0264	Endothelial_cells__FBXO34	FBXO34	Endothelial_cells
-0.840443	-1.16268	-2.42589	0.046469988434251	0.285790769644725	-4.02695	Endothelial_cells__MTF1	MTF1	Endothelial_cells
0.878564840250318	-0.372484	2.4256717949302	0.0464846933128131	0.285790769644725	-4.02726	Endothelial_cells__RNASEH2C	RNASEH2C	Endothelial_cells
-1.59586	-2.16253	-2.42555	0.0464929354918848	0.285790769644725	-4.02743	Endothelial_cells__MPP7	MPP7	Endothelial_cells
-0.87393	0.280737423704198	-2.42336	0.0466407360975735	0.286269211109225	-4.03053	Endothelial_cells__FBXO8	FBXO8	Endothelial_cells
-0.934648	-0.896221	-2.4226	0.0466923552185139	0.286269211109225	-4.03161	Endothelial_cells__PRKAB2	PRKAB2	Endothelial_cells
0.801903175541225	0.903766490021916	2.42190703734498	0.0467395558665218	0.286269211109225	-4.03259	Endothelial_cells__ITGA2	ITGA2	Endothelial_cells
-1.88503	-1.26111	-2.42054	0.0468326783918534	0.286269211109225	-4.03453	Endothelial_cells__PCDH9	PCDH9	Endothelial_cells
-1.1089	4.79458722277874	-2.42036	0.046844490885835	0.286269211109225	-4.03478	Endothelial_cells__CD14	CD14	Endothelial_cells
-1.05804	-0.69968	-2.42026	0.0468518283418013	0.286269211109225	-4.03493	Endothelial_cells__NRF1	NRF1	Endothelial_cells
1.66754995549067	-0.468866	2.42022194384113	0.0468540970252083	0.286269211109225	-4.03498	Endothelial_cells__INAFM1	INAFM1	Endothelial_cells
-0.854162	0.00165293936318863	-2.41986	0.0468787322457889	0.286269211109225	-4.03549	Endothelial_cells__TM6SF1	TM6SF1	Endothelial_cells
1.01535810224844	-2.74641	2.41983670066625	0.0468803237705002	0.286269211109225	-4.03552	Endothelial_cells__SRI	SRI	Endothelial_cells
1.09351429422231	1.33621072513687	2.41870637715075	0.0469573616210286	0.286529414055587	-4.03712	Endothelial_cells__FRMD4B	FRMD4B	Endothelial_cells
-0.818586	-0.328643	-2.41754	0.0470373242654271	0.286657960081162	-4.03878	Endothelial_cells__ZC2HC1A	ZC2HC1A	Endothelial_cells
-0.815189	0.229617074163092	-2.41731	0.0470526305269286	0.286657960081162	-4.0391	Endothelial_cells__ELMSAN1	ELMSAN1	Endothelial_cells
-0.937839	-1.55957	-2.41689	0.0470817531456143	0.286657960081162	-4.0397	Endothelial_cells__FBXO38	FBXO38	Endothelial_cells
0.92650620006357	1.72586538053725	2.41558116314004	0.0471710410124367	0.286820591300357	-4.04155	Endothelial_cells__COL18A1	COL18A1	Endothelial_cells
0.931509305038033	2.83189221978709	2.41548857575911	0.0471773866983286	0.286820591300357	-4.04168	Endothelial_cells__LYAR	LYAR	Endothelial_cells
2.03711224940266	0.0286586935906028	2.41335553669057	0.0473238227524079	0.287264414870092	-4.0447	Endothelial_cells__PFKP	PFKP	Endothelial_cells
-0.910524	-1.09929	-2.41274	0.0473659107908685	0.287264414870092	-4.04557	Endothelial_cells__NBPF12	NBPF12	Endothelial_cells
-0.794605	-0.453247	-2.41208	0.0474118540087638	0.287264414870092	-4.04651	Endothelial_cells__AP5M1	AP5M1	Endothelial_cells
0.981906278717919	-1.1558	2.41155607192813	0.0474477219821466	0.287264414870092	-4.04725	Endothelial_cells__RPRD1B	RPRD1B	Endothelial_cells
1.65249025003546	0.743925621153246	2.41146963210572	0.0474536820464797	0.287264414870092	-4.04737	Endothelial_cells__ALYREF	ALYREF	Endothelial_cells
0.897102972215087	-0.412733	2.41141461758054	0.0474574757234623	0.287264414870092	-4.04745	Endothelial_cells__SLC25A44	SLC25A44	Endothelial_cells
1.2875592576209	0.568734745631464	2.41071839974122	0.0475055122841127	0.287346205480138	-4.04843	Endothelial_cells__GNL2	GNL2	Endothelial_cells
-5.35394	33.4917438126737	-2.40906	0.0476203689128065	0.287631752521871	-4.05079	Endothelial_cells__S100A4	S100A4	Endothelial_cells
-1.69266	-0.938048	-2.40865	0.0476488411148844	0.287631752521871	-4.05137	Endothelial_cells__TPP2	TPP2	Endothelial_cells
-0.878942	-0.809427	-2.40854	0.0476563963387793	0.287631752521871	-4.05152	Endothelial_cells__C3ORF38	C3ORF38	Endothelial_cells
0.85887950638258	1.52802023610244	2.40619671316082	0.0478187117484035	0.28834226691352	-4.05484	Endothelial_cells__PXDN	PXDN	Endothelial_cells
-0.852519	-0.388394	-2.40584	0.0478434062967165	0.28834226691352	-4.05534	Endothelial_cells__TLR4	TLR4	Endothelial_cells
1.23050476596796	2.14730175111405	2.40377630570444	0.0479872353249293	0.288999826055996	-4.05826	Endothelial_cells__PLPP3	PLPP3	Endothelial_cells
0.84640305861171	0.614284236084083	2.40280099645427	0.0480553147532056	0.289200567383174	-4.05964	Endothelial_cells__YTHDF2	YTHDF2	Endothelial_cells
-1.80728	0.314613161276805	-2.40179	0.0481258509417716	0.289415792910668	-4.06107	Endothelial_cells__NUAK2	NUAK2	Endothelial_cells
1.47303955754884	1.17118262064827	2.39962504461627	0.048277694072941	0.290119312468656	-4.06414	Endothelial_cells__RIOK1	RIOK1	Endothelial_cells
-1.17697	1.42597121859662	-2.3989	0.0483287562116922	0.290216621897485	-4.06517	Endothelial_cells__PPM1D	PPM1D	Endothelial_cells
2.27569082943008	-0.892366	2.39722650997375	0.0484463394307365	0.290509689416756	-4.06753	Endothelial_cells__IMP4	IMP4	Endothelial_cells
0.992780289868283	0.557430397919132	2.39721189901671	0.0484473686063268	0.290509689416756	-4.06756	Endothelial_cells__LMNB1	LMNB1	Endothelial_cells
2.41301111985776	-0.326351	2.39599311958953	0.048533296861428	0.290629716846054	-4.06928	Endothelial_cells__MZB1	MZB1	Endothelial_cells
1.77604530254673	4.35977213571809	2.39550266737466	0.0485679196340027	0.290629716846054	-4.06997	Endothelial_cells__FN1	FN1	Endothelial_cells
1.3891817735484	2.89436874137857	2.39544288256073	0.048572141791765	0.290629716846054	-4.07006	Endothelial_cells__ADAMTS6	ADAMTS6	Endothelial_cells
-1.07656	-0.596607	-2.39417	0.0486624421661803	0.29096085211862	-4.07187	Endothelial_cells__ARNTL	ARNTL	Endothelial_cells
1.47451818787135	-0.27417	2.39209521628365	0.048809165160551	0.291628630029624	-4.0748	Endothelial_cells__BATF3	BATF3	Endothelial_cells
-0.943747	2.06736461366081	-2.39141	0.0488581139173912	0.291711680153835	-4.07577	Endothelial_cells__THSD1	THSD1	Endothelial_cells
-1.74126	2.24168530402574	-2.38823	0.0490843682833844	0.292852471127318	-4.08027	Endothelial_cells__TPST2	TPST2	Endothelial_cells
0.814161076516051	-2.24408	2.3875039837058	0.0491361690383887	0.292951529302657	-4.0813	Endothelial_cells__TIPARP	TIPARP	Endothelial_cells
-1.16701	-0.0131842	-2.3833	0.0494373743522956	0.29453633982402	-4.08724	Endothelial_cells__ZNF611	ZNF611	Endothelial_cells
0.860945219686296	0.0486534512147702	2.38244215287614	0.049499298034246	0.294538442178174	-4.08846	Endothelial_cells__BCAT2	BCAT2	Endothelial_cells
-1.17073	0.0582109604475256	-2.38231	0.0495085042181024	0.294538442178174	-4.08864	Endothelial_cells__SAMD12	SAMD12	Endothelial_cells
-1.03989	0.108699574134452	-2.38174	0.0495498993041459	0.294574151363147	-4.08945	Endothelial_cells__MAF	MAF	Endothelial_cells
-0.8572	0.96558195145726	-2.37962	0.0497027566073181	0.29517806231542	-4.09245	Endothelial_cells__U2SURP	U2SURP	Endothelial_cells
-1.20121	-0.74936	-2.37935	0.0497224129960614	0.29517806231542	-4.09283	Endothelial_cells__ACAD8	ACAD8	Endothelial_cells
0.88759763064892	0.311048214874931	2.37845848695421	0.0497870165697468	0.295292568847261	-4.0941	Endothelial_cells__HSF1	HSF1	Endothelial_cells
0.901955718733823	1.21793010919013	2.37810458669053	0.0498126596974113	0.295292568847261	-4.0946	Endothelial_cells__BCR	BCR	Endothelial_cells
1.25464297452837	3.04624683902904	2.37737739320378	0.0498653936671547	0.295394783979878	-4.09563	Endothelial_cells__CD320	CD320	Endothelial_cells
0.954464578179677	1.61766648220284	2.37567515683427	0.0499890589360188	0.295916740771326	-4.09803	Endothelial_cells__NR1D1	NR1D1	Endothelial_cells
-1.39204	1.78265909627635	-2.37029	0.0503822403857419	0.298032257804215	-4.10565	Endothelial_cells__MIER2	MIER2	Endothelial_cells
1.46602655589753	-0.0502198	2.3695251899998	0.0504384727447238	0.298152989101091	-4.10674	Endothelial_cells__MTHFD1L	MTHFD1L	Endothelial_cells
-1.51225	-0.289318	-2.3684	0.0505209863258078	0.298238457436972	-4.10833	Endothelial_cells__SNAPIN	SNAPIN	Endothelial_cells
0.833709425469862	-1.85441	2.36818631122396	0.0505368602052389	0.298238457436972	-4.10863	Endothelial_cells__ETHE1	ETHE1	Endothelial_cells
0.841266617432317	1.61133877968677	2.36786595737968	0.0505604305471065	0.298238457436972	-4.10908	Endothelial_cells__NOLC1	NOLC1	Endothelial_cells
-1.47825	16.6708417228685	-2.36696	0.0506269990359586	0.298419626753742	-4.11036	Endothelial_cells__RTN4	RTN4	Endothelial_cells
1.62164756476583	-0.947711	2.36549016972376	0.0507355833792127	0.298848025806926	-4.11244	Endothelial_cells__MYH10	MYH10	Endothelial_cells
0.86143877140563	-0.00896738	2.36455330544335	0.0508048236988783	0.298852359351153	-4.11377	Endothelial_cells__NFKBIE	NFKBIE	Endothelial_cells
-1.38974	-2.57761	-2.36451	0.0508081327023767	0.298852359351153	-4.11383	Endothelial_cells__FKBP15	FKBP15	Endothelial_cells
-1.38149	-0.477955	-2.36268	0.0509437293435324	0.299438318733207	-4.11642	Endothelial_cells__CCPG1	CCPG1	Endothelial_cells
-1.24706	-0.187705	-2.36171	0.0510158950491649	0.299650878259845	-4.1178	Endothelial_cells__COMTD1	COMTD1	Endothelial_cells
-1.06534	0.893417650259367	-2.36051	0.0511050868519073	0.299963073249947	-4.1195	Endothelial_cells__HID1	HID1	Endothelial_cells
0.870529211492778	-0.288858	2.35867206741318	0.0512417022512314	0.300172378045806	-4.12209	Endothelial_cells__SUPT5H	SUPT5H	Endothelial_cells
-1.3726	-1.55125	-2.35806	0.0512874047491975	0.300172378045806	-4.12295	Endothelial_cells__LSM14B	LSM14B	Endothelial_cells
1.86624950946481	0.587416139868572	2.35793211439613	0.05129694038045	0.300172378045806	-4.12314	Endothelial_cells__R3HDM4	R3HDM4	Endothelial_cells
-1.19211	0.597975581892794	-2.35783	0.0513044482938044	0.300172378045806	-4.12328	Endothelial_cells__XXYLT1	XXYLT1	Endothelial_cells
-0.979563	-0.0585714	-2.35761	0.0513210734061254	0.300172378045806	-4.12359	Endothelial_cells__SCFD1	SCFD1	Endothelial_cells
1.78887697770969	-2.97214	2.35607633749364	0.0514357441307401	0.300631810674262	-4.12576	Endothelial_cells__C3	C3	Endothelial_cells
-0.871088	-0.496951	-2.35444	0.0515587055761283	0.301139022112362	-4.12808	Endothelial_cells__PHF20	PHF20	Endothelial_cells
1.03104700762322	-0.850781	2.35299984324433	0.0516666998548185	0.301387713611453	-4.13011	Endothelial_cells__PAFAH1B1	PAFAH1B1	Endothelial_cells
-1.07693	0.505237286327265	-2.35291	0.0516737074760955	0.301387713611453	-4.13024	Endothelial_cells__KIAA0586	KIAA0586	Endothelial_cells
-1.039	0.997509611359795	-2.35171	0.0517637269531536	0.301652770302801	-4.13193	Endothelial_cells__NFYB	NFYB	Endothelial_cells
-1.04477	-0.665438	-2.35134	0.0517916386834919	0.301652770302801	-4.13246	Endothelial_cells__NCOA2	NCOA2	Endothelial_cells
-1.1037	0.55251303296028	-2.34986	0.0519036314618343	0.301942750941419	-4.13455	Endothelial_cells__IGFBP3	IGFBP3	Endothelial_cells
-1.06901	-0.988613	-2.34972	0.0519139825299976	0.301942750941419	-4.13475	Endothelial_cells__POP5	POP5	Endothelial_cells
-0.815597	0.707589158534561	-2.34845	0.0520098326033582	0.302288992149267	-4.13654	Endothelial_cells__APPBP2	APPBP2	Endothelial_cells
1.46993140740723	6.46914555922014	2.34693040993513	0.0521254567467913	0.302749599793122	-4.13869	Endothelial_cells__CTSS	CTSS	Endothelial_cells
0.812430334241046	0.536519314761941	2.34630782079118	0.0521727501501792	0.302812970362581	-4.13957	Endothelial_cells__DDX56	DDX56	Endothelial_cells
0.796991562102909	-0.0206915	2.34571217064248	0.052218038296616	0.302864622120373	-4.14042	Endothelial_cells__DXO	DXO	Endothelial_cells
1.28729431160302	-0.129878	2.34468674602837	0.0522960970624209	0.30290965408581	-4.14187	Endothelial_cells__RNF4	RNF4	Endothelial_cells
1.53042429776893	2.57542807612758	2.34421976552571	0.0523316847380469	0.30290965408581	-4.14253	Endothelial_cells__TMEM255B	TMEM255B	Endothelial_cells
-0.838858	0.411837088599311	-2.34418	0.052334985290808	0.30290965408581	-4.14259	Endothelial_cells__CTIF	CTIF	Endothelial_cells
1.71283219770202	1.28766411840471	2.34235716861217	0.0524738762702422	0.30336527333585	-4.14516	Endothelial_cells__PLEKHG5	PLEKHG5	Endothelial_cells
2.42918833676983	-1.25847	2.3421907152569	0.0524866026196834	0.30336527333585	-4.1454	Endothelial_cells__NAA20	NAA20	Endothelial_cells
-1.57904	-2.83992	-2.34106	0.0525732075598242	0.303497107810139	-4.147	Endothelial_cells__HAGH	HAGH	Endothelial_cells
1.06430619959146	0.278825255282664	2.34034632726863	0.0526278285201719	0.303497107810139	-4.148	Endothelial_cells__C19ORF48	C19ORF48	Endothelial_cells
-1.19822	0.718539335529404	-2.34026	0.0526346733202939	0.303497107810139	-4.14813	Endothelial_cells__FNTA	FNTA	Endothelial_cells
1.01429272699688	0.539002660321593	2.33998851529869	0.0526552713778494	0.303497107810139	-4.14851	Endothelial_cells__ACBD3	ACBD3	Endothelial_cells
-1.00837	0.139252582042944	-2.33911	0.0527224901032066	0.303674245764006	-4.14975	Endothelial_cells__ATP7A	ATP7A	Endothelial_cells
-0.834077	-0.0244347	-2.33653	0.0529215680165363	0.304285317332745	-4.1534	Endothelial_cells__ATL2	ATL2	Endothelial_cells
-1.54464	3.41065890817421	-2.33615	0.0529502889782711	0.304285317332745	-4.15393	Endothelial_cells__IFI27	IFI27	Endothelial_cells
-1.40416	-0.644089	-2.33585	0.052973992697497	0.304285317332745	-4.15436	Endothelial_cells__ZNF407	ZNF407	Endothelial_cells
0.885917880870494	0.142312925236452	2.33575045491571	0.0529814302446238	0.304285317332745	-4.1545	Endothelial_cells__MCFD2	MCFD2	Endothelial_cells
1.06424764314407	3.16829394112354	2.33497173370994	0.0530415844857542	0.304285317332745	-4.1556	Endothelial_cells__ELK3	ELK3	Endothelial_cells
1.25719014987095	-0.101196	2.33488952597327	0.0530479388982114	0.304285317332745	-4.15572	Endothelial_cells__TAF1D	TAF1D	Endothelial_cells
-1.06263	-1.36049	-2.3341	0.0531092367868498	0.304427119681096	-4.15684	Endothelial_cells__KIF13B	KIF13B	Endothelial_cells
-1.47888	-3.56108	-2.33297	0.0531966050161099	0.304551114600332	-4.15843	Endothelial_cells__AGER	AGER	Endothelial_cells
1.06928838703966	0.865487269874098	2.33287303511088	0.0532040514993252	0.304551114600332	-4.15857	Endothelial_cells__PMM2	PMM2	Endothelial_cells
-1.36897	-0.0307556	-2.33198	0.0532734611944528	0.304639254653279	-4.15983	Endothelial_cells__SLC9A9	SLC9A9	Endothelial_cells
1.18859547059043	-0.663585	2.33121949860908	0.0533324152626648	0.304639254653279	-4.1609	Endothelial_cells__ZNF687	ZNF687	Endothelial_cells
1.10036578260276	-0.996149	2.33023940445765	0.0534086491592333	0.304639254653279	-4.16229	Endothelial_cells__HOMER1	HOMER1	Endothelial_cells
1.15709426234732	0.834629633775107	2.32966994935945	0.0534529937744904	0.304639254653279	-4.16309	Endothelial_cells__LXN	LXN	Endothelial_cells
1.0816605768876	1.64710495627506	2.3296432534489	0.0534550735617627	0.304639254653279	-4.16313	Endothelial_cells__RBMS1	RBMS1	Endothelial_cells
-1.39298	-0.4843	-2.32885	0.0535167102683993	0.304639254653279	-4.16425	Endothelial_cells__LGALSL	LGALSL	Endothelial_cells
-0.92056	-0.684854	-2.32865	0.0535325336715332	0.304639254653279	-4.16454	Endothelial_cells__ZNF600	ZNF600	Endothelial_cells
-1.33395	1.0240892664471	-2.32854	0.0535411052728743	0.304639254653279	-4.16469	Endothelial_cells__JADE3	JADE3	Endothelial_cells
-0.90749	-0.199283	-2.32844	0.0535488681434275	0.304639254653279	-4.16483	Endothelial_cells__RGP1	RGP1	Endothelial_cells
0.788549676327299	2.04682141663976	2.3263471949851	0.0537124945609549	0.305361401797013	-4.16779	Endothelial_cells__ATN1	ATN1	Endothelial_cells
1.23467392758331	2.8407609804711	2.32245943999103	0.0540177552037907	0.30653660186759	-4.17328	Endothelial_cells__UPP1	UPP1	Endothelial_cells
2.34375195771304	0.490906559859301	2.32245622358586	0.0540180084832441	0.30653660186759	-4.17329	Endothelial_cells__ZYX	ZYX	Endothelial_cells
-0.88336	-0.286918	-2.32231	0.0540297002210447	0.30653660186759	-4.1735	Endothelial_cells__AGL	AGL	Endothelial_cells
1.18985767260262	1.01093363920662	2.32113987098337	0.0541217680312769	0.306849778831279	-4.17515	Endothelial_cells__NAALADL1	NAALADL1	Endothelial_cells
0.937953452828557	0.037408201467734	2.32028411700807	0.0541893307066555	0.306905645236195	-4.17636	Endothelial_cells__TP53	TP53	Endothelial_cells
1.58654346273884	3.12683184517758	2.32008111604674	0.0542053704790589	0.306905645236195	-4.17664	Endothelial_cells__ARHGEF3	ARHGEF3	Endothelial_cells
0.88749534889472	0.567991493679097	2.31804464633762	0.0543665471019655	0.307608954133011	-4.17952	Endothelial_cells__PBX2	PBX2	Endothelial_cells
1.06251686189412	0.0711487957371158	2.31734068685322	0.0544223757758587	0.307715647814179	-4.18052	Endothelial_cells__GALNT1	GALNT1	Endothelial_cells
1.08393974688084	-0.43203	2.31546508897856	0.0545714090139151	0.308348837218476	-4.18316	Endothelial_cells__NSDHL	NSDHL	Endothelial_cells
-0.8171	-0.543996	-2.31412	0.0546784726166339	0.308650916447504	-4.18506	Endothelial_cells__ENTPD5	ENTPD5	Endothelial_cells
1.05186201487689	-1.30321	2.31364646880421	0.0547163126129208	0.308650916447504	-4.18573	Endothelial_cells__ADCK2	ADCK2	Endothelial_cells
1.18144392460877	-4.1018	2.3131313354773	0.0547574286056332	0.308650916447504	-4.18646	Endothelial_cells__TGFBI	TGFBI	Endothelial_cells
-0.875067	-0.556863	-2.31293	0.0547732072080937	0.308650916447504	-4.18674	Endothelial_cells__HPS3	HPS3	Endothelial_cells
0.789289874863103	0.712678952835802	2.31188412252181	0.054857107041479	0.308864704174296	-4.18822	Endothelial_cells__HNRNPAB	HNRNPAB	Endothelial_cells
0.928955313257125	1.9283093854724	2.31153096242183	0.0548853655501362	0.308864704174296	-4.18872	Endothelial_cells__ROBO3	ROBO3	Endothelial_cells
1.5838766417914	-0.177681	2.31072656545071	0.0549497857448385	0.30889769543276	-4.18986	Endothelial_cells__FAM207A	FAM207A	Endothelial_cells
-0.984988	1.60628711234771	-2.31012	0.054998662335881	0.30889769543276	-4.19072	Endothelial_cells__RBM17	RBM17	Endothelial_cells
-0.856469	-0.620726	-2.31007	0.0550025693417458	0.30889769543276	-4.19079	Endothelial_cells__NEDD4L	NEDD4L	Endothelial_cells
1.02739150607136	-0.167339	2.30855112157556	0.0551243930099195	0.309190512873865	-4.19293	Endothelial_cells__HDGF	HDGF	Endothelial_cells
-0.751468	0.082333394040155	-2.30816	0.0551555801185462	0.309190512873865	-4.19348	Endothelial_cells__COG1	COG1	Endothelial_cells
-1.10642	-1.91938	-2.30803	0.055166155426852	0.309190512873865	-4.19366	Endothelial_cells__SLC9A6	SLC9A6	Endothelial_cells
-0.792364	-0.583839	-2.30714	0.0552381343071655	0.309252640387066	-4.19493	Endothelial_cells__FHL1	FHL1	Endothelial_cells
-0.809639	0.228824848682832	-2.30677	0.0552678902608417	0.309252640387066	-4.19545	Endothelial_cells__PSEN2	PSEN2	Endothelial_cells
-0.93911	-2.18325	-2.30575	0.0553496541192888	0.309252640387066	-4.19688	Endothelial_cells__EFNA5	EFNA5	Endothelial_cells
-0.916736	-1.25894	-2.30544	0.0553747098165692	0.309252640387066	-4.19732	Endothelial_cells__GAB2	GAB2	Endothelial_cells
0.852778661781788	1.19799958561797	2.3053155305885	0.0553851381049933	0.309252640387066	-4.1975	Endothelial_cells__FLNB	FLNB	Endothelial_cells
1.23716478174291	-2.9369	2.30487946758307	0.0554203749694981	0.309252640387066	-4.19812	Endothelial_cells__ERGIC1	ERGIC1	Endothelial_cells
1.20037674890752	1.52745421077532	2.30466968433071	0.0554373350303379	0.309252640387066	-4.19841	Endothelial_cells__WDR3	WDR3	Endothelial_cells
-1.14058	0.796661317522822	-2.30335	0.0555437747229512	0.309360102389637	-4.20027	Endothelial_cells__SDC3	SDC3	Endothelial_cells
-1.07249	1.00994499074516	-2.3033	0.0555483447580997	0.309360102389637	-4.20035	Endothelial_cells__GAS6	GAS6	Endothelial_cells
0.804387234672269	0.543986252038232	2.30293872037814	0.0555774780583363	0.309360102389637	-4.20086	Endothelial_cells__HEBP2	HEBP2	Endothelial_cells
1.02816174004099	0.994549452182696	2.30222631189365	0.0556352612470086	0.309360102389637	-4.20186	Endothelial_cells__TSR1	TSR1	Endothelial_cells
-0.925525	-0.431144	-2.30187	0.0556642207271966	0.309360102389637	-4.20237	Endothelial_cells__MTFR1	MTFR1	Endothelial_cells
-1.41767	-1.45756	-2.30168	0.0556796147278237	0.309360102389637	-4.20263	Endothelial_cells__CDKL1	CDKL1	Endothelial_cells
-1.11693	0.291634651138265	-2.30113	0.0557245693091902	0.309403329126344	-4.20342	Endothelial_cells__HECTD2	HECTD2	Endothelial_cells
-0.761272	-0.250272	-2.30001	0.0558154542070394	0.309701350243459	-4.20499	Endothelial_cells__C3ORF62	C3ORF62	Endothelial_cells
1.13511539261402	-1.98997	2.29800601205893	0.0559788264431429	0.310103956545382	-4.20782	Endothelial_cells__DHRSX	DHRSX	Endothelial_cells
-1.31504	-0.129447	-2.29776	0.0559987849240614	0.310103956545382	-4.20817	Endothelial_cells__C4ORF3	C4ORF3	Endothelial_cells
-0.861434	0.218463745348672	-2.29775	0.0559997893413084	0.310103956545382	-4.20818	Endothelial_cells__TTC33	TTC33	Endothelial_cells
1.35199286926181	1.06976581599956	2.2965348472109	0.0560990983206728	0.310447337315798	-4.2099	Endothelial_cells__RPF1	RPF1	Endothelial_cells
1.0734639169633	-0.411	2.29538650430576	0.0561931615584847	0.310761251595527	-4.21152	Endothelial_cells__NFKB1	NFKB1	Endothelial_cells
-0.743283	0.54626142343731	-2.29423	0.056287847987672	0.311078193095215	-4.21315	Endothelial_cells__GNAI3	GNAI3	Endothelial_cells
1.6418563935345	-0.256177	2.29271307061309	0.0564127712912844	0.311285547786183	-4.21529	Endothelial_cells__KPNA2	KPNA2	Endothelial_cells
-1.12524	1.55844022633213	-2.2925	0.0564306486155831	0.311285547786183	-4.2156	Endothelial_cells__RAB20	RAB20	Endothelial_cells
0.844207838566569	-0.969416	2.29241185344018	0.0564375695794004	0.311285547786183	-4.21572	Endothelial_cells__PPA2	PPA2	Endothelial_cells
-1.08013	-0.72557	-2.29139	0.0565215326931898	0.31154219642743	-4.21716	Endothelial_cells__CEP97	CEP97	Endothelial_cells
-1.22606	-3.34717	-2.29033	0.056609186390078	0.311818834099682	-4.21865	Endothelial_cells__IDS	IDS	Endothelial_cells
1.02808088848806	0.0603275383957388	2.2892835604516	0.0566957697655966	0.312089214126363	-4.22013	Endothelial_cells__MDN1	MDN1	Endothelial_cells
9.68154800725402	12.4967408594507	2.28814347366463	0.0567901680432391	0.312317421594911	-4.22174	Endothelial_cells__SCGB3A2	SCGB3A2	Endothelial_cells
-1.10331	-0.652168	-2.28788	0.0568122763780722	0.312317421594911	-4.22212	Endothelial_cells__C2CD5	C2CD5	Endothelial_cells
1.38042735891623	-0.752371	2.28569170501935	0.0569937150597767	0.312835719556378	-4.2252	Endothelial_cells__OXA1L	OXA1L	Endothelial_cells
-0.801867	1.31926380415606	-2.28522	0.0570327356134837	0.312835719556378	-4.22586	Endothelial_cells__ABHD17C	ABHD17C	Endothelial_cells
0.915468627970463	3.95753455485244	2.28514454685477	0.0570392416823257	0.312835719556378	-4.22597	Endothelial_cells__FOSB	FOSB	Endothelial_cells
1.12171010116478	-0.66266	2.28471137987911	0.0570753098547629	0.312835719556378	-4.22659	Endothelial_cells__DDX41	DDX41	Endothelial_cells
-1.39261	-1.48442	-2.28448	0.057094492130979	0.312835719556378	-4.22691	Endothelial_cells__TM7SF2	TM7SF2	Endothelial_cells
-0.821899	0.035356497754856	-2.28245	0.0572640862621699	0.313558546026342	-4.22978	Endothelial_cells__MAP2K5	MAP2K5	Endothelial_cells
-0.81005	-0.0798947	-2.28088	0.0573954331516386	0.314071130914588	-4.23199	Endothelial_cells__DPY19L3	DPY19L3	Endothelial_cells
0.815077072203175	-0.243623	2.2786069575474	0.0575860777489688	0.314747885328594	-4.2352	Endothelial_cells__ANKRD10	ANKRD10	Endothelial_cells
0.895767738481056	-0.787786	2.27850389486427	0.0575947410014957	0.314747885328594	-4.23534	Endothelial_cells__GALE	GALE	Endothelial_cells
0.960849032579182	0.813854405438735	2.27741492798354	0.0576863585437905	0.31486837606257	-4.23688	Endothelial_cells__CYB5B	CYB5B	Endothelial_cells
-0.794015	0.195543211371822	-2.27734	0.0576924514592598	0.31486837606257	-4.23698	Endothelial_cells__GKAP1	GKAP1	Endothelial_cells
1.57194811348462	0.238505138281412	2.27673804445882	0.0577433811793744	0.314892578137479	-4.23783	Endothelial_cells__LDLRAD3	LDLRAD3	Endothelial_cells
-1.39119	-0.10301	-2.27639	0.057772553984853	0.314892578137479	-4.23832	Endothelial_cells__GSTCD	GSTCD	Endothelial_cells
-1.555	1.98373408945459	-2.27581	0.0578220199450124	0.314905344938905	-4.23915	Endothelial_cells__PLA1A	PLA1A	Endothelial_cells
-1.00881	-2.12927	-2.27546	0.0578514357718953	0.314905344938905	-4.23964	Endothelial_cells__ZBTB8OS	ZBTB8OS	Endothelial_cells
1.01996390704857	-2.91808	2.27501963188128	0.0578884029504415	0.314905344938905	-4.24026	Endothelial_cells__PRDX5	PRDX5	Endothelial_cells
1.52771044097379	-1.11544	2.27327072823633	0.0580363783521018	0.315504099950714	-4.24273	Endothelial_cells__ZPR1	ZPR1	Endothelial_cells
-0.898815	0.57431863033418	-2.27215	0.058131574706536	0.315815336999021	-4.24431	Endothelial_cells__ZNF559	ZNF559	Endothelial_cells
-1.35689	-1.06122	-2.26836	0.0584538931482798	0.316703843120362	-4.24965	Endothelial_cells__B3GALT4	B3GALT4	Endothelial_cells
1.10564029429528	10.4859063398749	2.26820878754265	0.0584668425738751	0.316703843120362	-4.24986	Endothelial_cells__ZNF706	ZNF706	Endothelial_cells
-1.11889	-0.270556	-2.26813	0.0584731979600438	0.316703843120362	-4.24997	Endothelial_cells__JAK2	JAK2	Endothelial_cells
0.823559476512502	0.157248931046126	2.26801310258803	0.0584835485157326	0.316703843120362	-4.25014	Endothelial_cells__CALU	CALU	Endothelial_cells
1.02373374255565	-0.16269	2.26756094266903	0.0585221687030082	0.316703843120362	-4.25078	Endothelial_cells__TMEM258	TMEM258	Endothelial_cells
1.66773208919685	-1.12389	2.2675461767117	0.0585234303399155	0.316703843120362	-4.2508	Endothelial_cells__EIF3M	EIF3M	Endothelial_cells
-0.753027	-0.758146	-2.26638	0.0586230980400022	0.316829732336263	-4.25244	Endothelial_cells__TFB1M	TFB1M	Endothelial_cells
-0.759153	0.755494706491112	-2.26593	0.0586614355025932	0.316829732336263	-4.25307	Endothelial_cells__MLH3	MLH3	Endothelial_cells
0.744239836554277	0.617732579895704	2.26590793870615	0.0586635769353145	0.316829732336263	-4.25311	Endothelial_cells__TCERG1	TCERG1	Endothelial_cells
0.935922663539965	2.13857898459722	2.26549495423896	0.0586989603823763	0.316829732336263	-4.25369	Endothelial_cells__SMARCE1	SMARCE1	Endothelial_cells
-0.78159	-0.759767	-2.26467	0.0587699105491973	0.317007106611127	-4.25486	Endothelial_cells__BRWD1	BRWD1	Endothelial_cells
-0.931025	-0.165755	-2.26365	0.0588571554748878	0.317217054621938	-4.25629	Endothelial_cells__CROT	CROT	Endothelial_cells
-1.0543	-3.30842	-2.26333	0.058885059400564	0.317217054621938	-4.25675	Endothelial_cells__CYB5R4	CYB5R4	Endothelial_cells
-0.881708	1.85135532685287	-2.26274	0.058935869343626	0.31728540785705	-4.25758	Endothelial_cells__BCAP29	BCAP29	Endothelial_cells
0.93917881894739	1.94823698580842	2.26185	0.059012516979876	0.317492681851007	-4.25883	Endothelial_cells__MXD1	MXD1	Endothelial_cells
0.920797446487595	-0.250946	2.26069833896528	0.0591115142560958	0.317819853458324	-4.26045	Endothelial_cells__FAAP20	FAAP20	Endothelial_cells
1.61903472161567	-4.80165	2.25991668355153	0.0591790225658761	0.317923247759854	-4.26155	Endothelial_cells__DMKN	DMKN	Endothelial_cells
-1.21401	-0.229449	-2.25959	0.0592071409380961	0.317923247759854	-4.26201	Endothelial_cells__PTCD1	PTCD1	Endothelial_cells
-0.756466	-0.230726	-2.25841	0.0593094096506962	0.31807633083095	-4.26368	Endothelial_cells__RMDN2	RMDN2	Endothelial_cells
1.96343983503661	-0.80998	2.25837867309854	0.0593120828366737	0.31807633083095	-4.26372	Endothelial_cells__MBOAT7	MBOAT7	Endothelial_cells
-1.00934	2.81808242560516	-2.25654	0.0594714722183002	0.318370870747587	-4.26631	Endothelial_cells__APP	APP	Endothelial_cells
3.16374000172037	38.4069	2.25645733748583	0.0594787333039685	0.318370870747587	-4.26643	Endothelial_cells__PFN1	PFN1	Endothelial_cells
-0.8778	0.656121293252295	-2.25642	0.0594817618662138	0.318370870747587	-4.26648	Endothelial_cells__GXYLT1	GXYLT1	Endothelial_cells
0.881376143820135	-0.430207	2.2555473558943	0.0595578280395035	0.318573138028784	-4.26771	Endothelial_cells__SHMT2	SHMT2	Endothelial_cells
-0.756002	-0.168112	-2.25476	0.0596260064881271	0.318675229691498	-4.26882	Endothelial_cells__FOPNL	FOPNL	Endothelial_cells
0.923579424086041	-0.418456	2.25444839263828	0.0596534912723001	0.318675229691498	-4.26926	Endothelial_cells__NIPAL2	NIPAL2	Endothelial_cells
-0.799805	-0.740882	-2.25281	0.0597965938554544	0.319234798370075	-4.27157	Endothelial_cells__COMMD8	COMMD8	Endothelial_cells
-0.901779	-0.913558	-2.25125	0.0599331702818352	0.319654370543322	-4.27377	Endothelial_cells__SPPL2A	SPPL2A	Endothelial_cells
1.35635751507028	-0.725414	2.25054335563899	0.0599946831691723	0.319654370543322	-4.27476	Endothelial_cells__FLNA	FLNA	Endothelial_cells
-0.785088	1.15703507287218	-2.25023	0.0600223355948458	0.319654370543322	-4.27521	Endothelial_cells__CFL2	CFL2	Endothelial_cells
-0.841687	-0.886382	-2.25015	0.0600288094628394	0.319654370543322	-4.27531	Endothelial_cells__TMEM50A	TMEM50A	Endothelial_cells
-0.806048	-0.505445	-2.24932	0.0601023234099478	0.319698626340519	-4.27649	Endothelial_cells__POC5	POC5	Endothelial_cells
-1.14081	1.61693418003293	-2.24879	0.0601485833315214	0.319698626340519	-4.27723	Endothelial_cells__ACAT1	ACAT1	Endothelial_cells
0.759342565745417	0.0351222493377994	2.24874636898315	0.0601523547818399	0.319698626340519	-4.2773	Endothelial_cells__COL6A2	COL6A2	Endothelial_cells
-2.78981	1.11921926542505	-2.24783	0.0602331049727985	0.31984258430426	-4.27859	Endothelial_cells__GPX3	GPX3	Endothelial_cells
0.860287414479667	0.245273401300836	2.2475643330019	0.0602562984727958	0.31984258430426	-4.27896	Endothelial_cells__GSK3A	GSK3A	Endothelial_cells
-0.939828	0.312862981989149	-2.24683	0.0603205983933077	0.319902692504615	-4.27999	Endothelial_cells__PPWD1	PPWD1	Endothelial_cells
-1.03029	-0.698269	-2.24632	0.0603657274376912	0.319902692504615	-4.28071	Endothelial_cells__MTERF1	MTERF1	Endothelial_cells
-1.08255	-0.251407	-2.24575	0.0604165230823266	0.319902692504615	-4.28152	Endothelial_cells__PARP9	PARP9	Endothelial_cells
-0.840312	0.016186716994355	-2.24569	0.060421366408417	0.319902692504615	-4.2816	Endothelial_cells__CSF1	CSF1	Endothelial_cells
0.796672059369454	0.105058503995066	2.24459889615709	0.0605178704248067	0.320209939952744	-4.28314	Endothelial_cells__SSBP3	SSBP3	Endothelial_cells
-0.897671	2.35963665531487	-2.24215	0.0607349530849681	0.321154392964542	-4.28659	Endothelial_cells__ACVRL1	ACVRL1	Endothelial_cells
1.87127619572619	1.43860419122347	2.24028807881672	0.0609001699355483	0.321695799950293	-4.28921	Endothelial_cells__RBM8A	RBM8A	Endothelial_cells
-1.06843	0.553942768188592	-2.24013	0.0609146438449672	0.321695799950293	-4.28944	Endothelial_cells__SP100	SP100	Endothelial_cells
-0.786134	-1.45878	-2.23906	0.0610092569807124	0.321991151458763	-4.29093	Endothelial_cells__GPN3	GPN3	Endothelial_cells
-1.25481	-1.69074	-2.23783	0.061119681163302	0.322369522384133	-4.29268	Endothelial_cells__VDAC3	VDAC3	Endothelial_cells
-1.75208	-0.176089	-2.23562	0.0613167481672264	0.323204113360244	-4.29578	Endothelial_cells__SULT1B1	SULT1B1	Endothelial_cells
-0.93725	0.288132007573119	-2.23284	0.061566097014889	0.324313054085393	-4.29969	Endothelial_cells__NUCKS1	NUCKS1	Endothelial_cells
1.03383854121507	1.50232576294189	2.23215882977045	0.061627778487277	0.324357429180511	-4.30065	Endothelial_cells__NIP7	NIP7	Endothelial_cells
2.26390745807315	0.420034316879341	2.23188474501297	0.0616524634102569	0.324357429180511	-4.30104	Endothelial_cells__TIMP1	TIMP1	Endothelial_cells
0.962477058280345	-1.31833	2.23064989700571	0.061763801958162	0.324429502530218	-4.30278	Endothelial_cells__IMPDH1	IMPDH1	Endothelial_cells
1.11752024390284	-0.559324	2.23059304372129	0.0617689329673488	0.324429502530218	-4.30286	Endothelial_cells__HAUS4	HAUS4	Endothelial_cells
0.926157335058298	-0.05716	2.2297788485045	0.0618424614848787	0.324429502530218	-4.304	Endothelial_cells__SLC52A2	SLC52A2	Endothelial_cells
0.79214857869055	0.315566851615465	2.22933794138612	0.0618823160250644	0.324429502530218	-4.30463	Endothelial_cells__ILF3	ILF3	Endothelial_cells
-1.0993	-1.09105	-2.22894	0.0619180380681422	0.324429502530218	-4.30518	Endothelial_cells__SLC25A4	SLC25A4	Endothelial_cells
1.75076707380242	0.33594236965617	2.22878508116029	0.0619323270174611	0.324429502530218	-4.3054	Endothelial_cells__MAP2K3	MAP2K3	Endothelial_cells
1.08730034299041	-0.200986	2.22871110474356	0.0619390219296547	0.324429502530218	-4.30551	Endothelial_cells__STAB1	STAB1	Endothelial_cells
1.0011667743174	-0.0516001	2.22627925659261	0.0621595143454689	0.325090589665587	-4.30893	Endothelial_cells__CASP2	CASP2	Endothelial_cells
-0.726759	0.218558984528188	-2.22626	0.0621612629322478	0.325090589665587	-4.30896	Endothelial_cells__RNF8	RNF8	Endothelial_cells
0.853310557999279	0.548374363397517	2.22602721057138	0.0621824124411408	0.325090589665587	-4.30928	Endothelial_cells__AGPAT5	AGPAT5	Endothelial_cells
-0.761689	-0.348183	-2.2251	0.062266430401544	0.325297972009025	-4.31058	Endothelial_cells__NSUN3	NSUN3	Endothelial_cells
-0.791405	-1.31171	-2.22457	0.0623147117958913	0.325297972009025	-4.31133	Endothelial_cells__PSEN1	PSEN1	Endothelial_cells
-0.718936	-0.489132	-2.2243	0.06233933261497	0.325297972009025	-4.31171	Endothelial_cells__RNF170	RNF170	Endothelial_cells
-0.762664	0.007722493091873	-2.22163	0.0625831307439266	0.3262524414035	-4.31547	Endothelial_cells__VBP1	VBP1	Endothelial_cells
1.23476523672687	1.74656186272978	2.22124992182064	0.0626180426106469	0.3262524414035	-4.31601	Endothelial_cells__DSTN	DSTN	Endothelial_cells
1.18674093790693	-1.6547	2.22101175087806	0.0626398415670783	0.3262524414035	-4.31634	Endothelial_cells__NTAN1	NTAN1	Endothelial_cells
-0.825728	1.47961396153988	-2.22023	0.0627113760622308	0.326273384700404	-4.31744	Endothelial_cells__CPNE8	CPNE8	Endothelial_cells
-1.33169	-0.528413	-2.22011	0.0627222654716624	0.326273384700404	-4.31761	Endothelial_cells__USP18	USP18	Endothelial_cells
-0.896623	0.128570023278135	-2.21923	0.0628028821037045	0.326488686913887	-4.31884	Endothelial_cells__PSMA4	PSMA4	Endothelial_cells
1.24999880317791	0.254169795227985	2.21643573020795	0.0630601635264806	0.32762156119282	-4.32278	Endothelial_cells__C1ORF216	C1ORF216	Endothelial_cells
1.06614303355259	-1.74909	2.21585524439932	0.0631136865915217	0.327695080162966	-4.32359	Endothelial_cells__GLMP	GLMP	Endothelial_cells
0.738211348566264	0.175244244816469	2.21184143013398	0.0634850357570154	0.329417676188054	-4.32924	Endothelial_cells__NR2F6	NR2F6	Endothelial_cells
-0.929825	-0.255415	-2.2113	0.0635354615332574	0.329473922954082	-4.33	Endothelial_cells__FBXL4	FBXL4	Endothelial_cells
0.962914719366361	1.73839627277574	2.2105971621499	0.0636006008322743	0.329606351635753	-4.33099	Endothelial_cells__FEZ2	FEZ2	Endothelial_cells
1.14888833484336	-1.32512	2.20912985870925	0.0637371543922403	0.32989259676688	-4.33305	Endothelial_cells__PLEKHA4	PLEKHA4	Endothelial_cells
-0.925886	0.849934898437604	-2.2084	0.0638047299975319	0.32989259676688	-4.33407	Endothelial_cells__GRPEL2	GRPEL2	Endothelial_cells
1.03237220367656	-1.97609	2.20803956523199	0.0638388137474092	0.32989259676688	-4.33458	Endothelial_cells__MCUR1	MCUR1	Endothelial_cells
1.70740249070421	0.797216376180543	2.20803264193539	0.0638394598016269	0.32989259676688	-4.33459	Endothelial_cells__FOSL1	FOSL1	Endothelial_cells
0.738410044910325	0.0261380476352228	2.20787667472972	0.0638540157865485	0.32989259676688	-4.33481	Endothelial_cells__DNMBP	DNMBP	Endothelial_cells
1.13036563295024	6.5042386913243	2.20706314453491	0.0639299947105538	0.330080239439168	-4.33596	Endothelial_cells__CD9	CD9	Endothelial_cells
0.859337972947964	0.720490852322868	2.2060458410463	0.0640251334805654	0.330308816710918	-4.33739	Endothelial_cells__ZNF35	ZNF35	Endothelial_cells
-1.54031	-0.254624	-2.20553	0.0640731975618328	0.330308816710918	-4.33811	Endothelial_cells__ZNF823	ZNF823	Endothelial_cells
0.85805344090987	0.661155312126654	2.20531762630571	0.064093324400833	0.330308816710918	-4.33841	Endothelial_cells__CAPRIN2	CAPRIN2	Endothelial_cells
1.28520299789816	0.367007260658699	2.20393999306761	0.0642225285406615	0.330609309283331	-4.34035	Endothelial_cells__BANF1	BANF1	Endothelial_cells
1.09453820409999	0.891475086707238	2.2029968459752	0.0643111352867738	0.330609309283331	-4.34167	Endothelial_cells__SNRPB	SNRPB	Endothelial_cells
1.39944567477677	0.987017371616853	2.20270815832425	0.0643382815914342	0.330609309283331	-4.34208	Endothelial_cells__KANK1	KANK1	Endothelial_cells
-0.817364	0.197651850847425	-2.20148	0.0644535494818951	0.330609309283331	-4.3438	Endothelial_cells__NR2C1	NR2C1	Endothelial_cells
-1.7636	-4.85209	-2.20099	0.0644999408996578	0.330609309283331	-4.34449	Endothelial_cells__SFTPD	SFTPD	Endothelial_cells
1.29990075187874	0.235978151473324	2.20084929854084	0.064513354190144	0.330609309283331	-4.34469	Endothelial_cells__EIF3B	EIF3B	Endothelial_cells
1.55717884082147	-2.47175	2.2008292434904	0.0645152456532003	0.330609309283331	-4.34472	Endothelial_cells__IFT57	IFT57	Endothelial_cells
0.894046316405243	-0.786014	2.19979560951372	0.0646128072470824	0.330609309283331	-4.34617	Endothelial_cells__GOLGA8B	GOLGA8B	Endothelial_cells
0.80202508478925	0.214555455755795	2.19979020477808	0.0646133177753333	0.330609309283331	-4.34618	Endothelial_cells__DNAAF2	DNAAF2	Endothelial_cells
-1.14055	-0.585447	-2.19924	0.064665324699822	0.330609309283331	-4.34695	Endothelial_cells__TRIQK	TRIQK	Endothelial_cells
-0.72717	-0.830962	-2.1992	0.0646686540635669	0.330609309283331	-4.347	Endothelial_cells__PIGA	PIGA	Endothelial_cells
1.8099562102533	-3.33429	2.19885016119715	0.0647021757823693	0.330609309283331	-4.3475	Endothelial_cells__TBC1D2	TBC1D2	Endothelial_cells
1.29752921292106	-0.264342	2.1987959990895	0.0647072992376808	0.330609309283331	-4.34758	Endothelial_cells__COA4	COA4	Endothelial_cells
0.961151613766525	-1.97063	2.19790563450182	0.0647915818930509	0.330609309283331	-4.34883	Endothelial_cells__NPC1	NPC1	Endothelial_cells
0.883634026673632	-0.703854	2.19721128569609	0.0648573864845565	0.330609309283331	-4.3498	Endothelial_cells__TMEM14A	TMEM14A	Endothelial_cells
-0.870378	2.96653468845716	-2.19716	0.0648625563670458	0.330609309283331	-4.34988	Endothelial_cells__EGFL7	EGFL7	Endothelial_cells
-1.23511	-1.48803	-2.19678	0.0648982684158712	0.330609309283331	-4.35041	Endothelial_cells__KHK	KHK	Endothelial_cells
1.43109777057581	-3.81185	2.1967368293284	0.0649023903239599	0.330609309283331	-4.35047	Endothelial_cells__SLC39A8	SLC39A8	Endothelial_cells
-4.59083	-5.26002	-2.19605	0.06496713773309	0.330609309283331	-4.35143	Endothelial_cells__ARID3A	ARID3A	Endothelial_cells
1.06363304054781	-0.394342	2.19591573125463	0.064980348873756	0.330609309283331	-4.35162	Endothelial_cells__BAHD1	BAHD1	Endothelial_cells
0.900224620192293	0.488270093423879	2.19585833353683	0.0649858019929748	0.330609309283331	-4.3517	Endothelial_cells__IFT43	IFT43	Endothelial_cells
-1.40977	-1.67078	-2.19538	0.0650314477293122	0.330639425443534	-4.35238	Endothelial_cells__ZNF606	ZNF606	Endothelial_cells
-1.07073	-0.323589	-2.19428	0.0651355407623977	0.330946413652823	-4.35391	Endothelial_cells__MAGT1	MAGT1	Endothelial_cells
-1.03758	-1.64311	-2.19391	0.0651713531151	0.330946413652823	-4.35444	Endothelial_cells__RCHY1	RCHY1	Endothelial_cells
-1.0246	0.196063584522191	-2.19342	0.065218118037924	0.330981949042464	-4.35513	Endothelial_cells__GSTO2	GSTO2	Endothelial_cells
0.764851356673534	0.435526898023231	2.19194893198986	0.0653583077444633	0.331491282972071	-4.35719	Endothelial_cells__TARS	TARS	Endothelial_cells
-0.777117	-0.589912	-2.19144	0.0654071232566703	0.331536837311368	-4.35791	Endothelial_cells__IFFO1	IFFO1	Endothelial_cells
-0.867133	1.80675344991879	-2.19049	0.0654976811112351	0.33167766077874	-4.35924	Endothelial_cells__PHLDB1	PHLDB1	Endothelial_cells
-1.02082	-0.253745	-2.18999	0.0655454730704631	0.33167766077874	-4.35994	Endothelial_cells__HDX	HDX	Endothelial_cells
0.848754915277217	0.082189186667288	2.18989939387713	0.0655544577653522	0.33167766077874	-4.36007	Endothelial_cells__PRKACA	PRKACA	Endothelial_cells
-0.860616	0.694150839812516	-2.18833	0.065705501789181	0.332118227539631	-4.36228	Endothelial_cells__MOCS2	MOCS2	Endothelial_cells
1.40959762610052	-2.06338	2.18746124968313	0.0657885731678581	0.332118227539631	-4.3635	Endothelial_cells__DAP3	DAP3	Endothelial_cells
1.05012189384988	-0.497941	2.18739126388884	0.0657953057854357	0.332118227539631	-4.36359	Endothelial_cells__LRRC59	LRRC59	Endothelial_cells
0.72099761431986	-2.19642	2.18733053671292	0.065801148289421	0.332118227539631	-4.36368	Endothelial_cells__PNPLA4	PNPLA4	Endothelial_cells
-0.9984	-0.639667	-2.18691	0.0658417646305592	0.332121822436451	-4.36427	Endothelial_cells__THRB	THRB	Endothelial_cells
-1.67065	-0.0962036	-2.18501	0.0660244330790793	0.332734231114707	-4.36693	Endothelial_cells__ZSCAN31	ZSCAN31	Endothelial_cells
1.66611287257912	-4.75083	2.1848201649156	0.0660431274542227	0.332734231114707	-4.3672	Endothelial_cells__RAB34	RAB34	Endothelial_cells
2.00758541489455	-0.71353	2.18388518406045	0.0661334812018666	0.33298787903396	-4.36852	Endothelial_cells__EIF3G	EIF3G	Endothelial_cells
0.923239667893425	3.02777511234401	2.18344021981766	0.0661765249979777	0.33300315450917	-4.36914	Endothelial_cells__CST3	CST3	Endothelial_cells
-0.924889	0.117677107807142	-2.18164	0.0663505570442873	0.333677151830576	-4.37166	Endothelial_cells__OSGIN1	OSGIN1	Endothelial_cells
-1.49037	-1.29904	-2.18083	0.0664293584353507	0.333871709092647	-4.3728	Endothelial_cells__CMPK1	CMPK1	Endothelial_cells
0.95405542272994	0.18978021013525	2.18023114786577	0.0664877938239526	0.333941481493617	-4.37364	Endothelial_cells__SMIM4	SMIM4	Endothelial_cells
0.760420869035492	-0.0394655	2.17956662146484	0.0665524348917427	0.333941481493617	-4.37458	Endothelial_cells__CYSLTR1	CYSLTR1	Endothelial_cells
1.34452086482995	-2.31861	2.17942618208643	0.066566104086181	0.333941481493617	-4.37477	Endothelial_cells__VASP	VASP	Endothelial_cells
0.730930013008091	0.0499365856332446	2.17903974000217	0.0666037317408872	0.333941481493617	-4.37532	Endothelial_cells__TSPYL4	TSPYL4	Endothelial_cells
-0.778827	-0.59813	-2.17808	0.0666968240654694	0.333965914857373	-4.37666	Endothelial_cells__FBXL20	FBXL20	Endothelial_cells
1.42035466986032	-0.943429	2.17791414846846	0.0667134522273254	0.333965914857373	-4.3769	Endothelial_cells__ALG3	ALG3	Endothelial_cells
-0.78665	-0.141901	-2.17775	0.0667289819065015	0.333965914857373	-4.37712	Endothelial_cells__POMGNT2	POMGNT2	Endothelial_cells
-0.743146	-0.20357	-2.17733	0.0667707831012179	0.3339742955237	-4.37772	Endothelial_cells__PIGH	PIGH	Endothelial_cells
1.80677131249271	-1.27886	2.17424117936682	0.0670727552420066	0.335260993128804	-4.38205	Endothelial_cells__POLE	POLE	Endothelial_cells
-0.84401	1.91661950268098	-2.17388	0.0671085924008876	0.335260993128804	-4.38256	Endothelial_cells__JAM3	JAM3	Endothelial_cells
-0.87389	0.789401530345735	-2.17196	0.0672965272309838	0.335998198046478	-4.38524	Endothelial_cells__SRGAP2C	SRGAP2C	Endothelial_cells
1.89862263140372	-1.26928	2.17129094556071	0.0673627697401076	0.336127297689997	-4.38619	Endothelial_cells__P3H3	P3H3	Endothelial_cells
-0.989565	0.353782936335992	-2.16977	0.0675126412042167	0.336673285046552	-4.38832	Endothelial_cells__MPG	MPG	Endothelial_cells
1.11757938332724	1.29629627910102	2.16837906196021	0.0676502533230697	0.337157520004736	-4.39027	Endothelial_cells__DFFA	DFFA	Endothelial_cells
1.09844717229039	1.03370712685499	2.1674102419549	0.0677461764562156	0.337379056627757	-4.39163	Endothelial_cells__SLC22A17	SLC22A17	Endothelial_cells
-1.11974	0.224697370286922	-2.16711	0.0677757758838893	0.337379056627757	-4.39205	Endothelial_cells__ZNF577	ZNF577	Endothelial_cells
-0.719015	1.34845347374933	-2.16551	0.067935002905652	0.33794526894484	-4.3943	Endothelial_cells__TTC28	TTC28	Endothelial_cells
0.71649078837613	0.356307330200686	2.16514765861072	0.0679707293300087	0.33794526894484	-4.3948	Endothelial_cells__DEK	DEK	Endothelial_cells
0.922214957376487	0.40266033807842	2.1642730326385	0.0680577334047406	0.338080497967943	-4.39603	Endothelial_cells__NCBP2	NCBP2	Endothelial_cells
0.89862972280279	-0.78618	2.1640577307159	0.0680791679195328	0.338080497967943	-4.39633	Endothelial_cells__POLR2A	POLR2A	Endothelial_cells
-1.63675	0.854479063020337	-2.16294	0.0681904749064914	0.338431319407709	-4.3979	Endothelial_cells__NDUFA12	NDUFA12	Endothelial_cells
-0.793099	-2.72972	-2.15973	0.068511937876216	0.339733525333736	-4.4024	Endothelial_cells__SNX2	SNX2	Endothelial_cells
0.924784734999721	-0.424408	2.15950020250161	0.0685344934561268	0.339733525333736	-4.40272	Endothelial_cells__CNIH1	CNIH1	Endothelial_cells
-1.12513	-1.32826	-2.15811	0.0686740010641432	0.340222446938609	-4.40467	Endothelial_cells__CDKN2C	CDKN2C	Endothelial_cells
-0.87277	-0.456433	-2.15727	0.0687588647533362	0.340440232803104	-4.40585	Endothelial_cells__DDX59	DDX59	Endothelial_cells
1.1695719523074	-4.52891	2.1564451979074	0.068841422199914	0.340646347782333	-4.407	Endothelial_cells__ANXA4	ANXA4	Endothelial_cells
0.908964130355094	0.635180839579681	2.15499508106758	0.0689875955423348	0.341166819785414	-4.40903	Endothelial_cells__SGCB	SGCB	Endothelial_cells
9.45405943550527	16.7840593956462	2.1540558088357	0.0690824417800612	0.34143299461725	-4.41035	Endothelial_cells__LYZ	LYZ	Endothelial_cells
1.05402422756812	-1.19139	2.15253449295736	0.0692363402243536	0.341990539873765	-4.41248	Endothelial_cells__ATP2A2	ATP2A2	Endothelial_cells
0.959406494149913	-2.4335	2.15158564941058	0.0693325011228849	0.342262400264396	-4.41381	Endothelial_cells__PTPN13	PTPN13	Endothelial_cells
1.63376083720829	-1.89931	2.15109271934478	0.0693825103038517	0.342306243781243	-4.4145	Endothelial_cells__SEC11A	SEC11A	Endothelial_cells
0.724251603608295	-0.294188	2.1506316134712	0.0694293236648773	0.342334277762307	-4.41514	Endothelial_cells__SNAP47	SNAP47	Endothelial_cells
1.00142975158069	-0.328406	2.15006623743434	0.0694867663102532	0.342414657193746	-4.41594	Endothelial_cells__RELB	RELB	Endothelial_cells
-0.813334	0.462064471478002	-2.14936	0.0695590706374195	0.342535115729714	-4.41693	Endothelial_cells__KIF1BP	KIF1BP	Endothelial_cells
-0.838485	-1.00087	-2.14902	0.0695935216507206	0.342535115729714	-4.41741	Endothelial_cells__IQCE	IQCE	Endothelial_cells
-0.981147	1.03648087709382	-2.14796	0.0697014409885022	0.342863530347106	-4.41889	Endothelial_cells__NDRG2	NDRG2	Endothelial_cells
0.879195631066736	-0.694533	2.14707460645951	0.0697915146701985	0.342885192327823	-4.42013	Endothelial_cells__DNAJC25	DNAJC25	Endothelial_cells
-0.77347	0.173266329119876	-2.14665	0.069834684488616	0.342885192327823	-4.42072	Endothelial_cells__MUL1	MUL1	Endothelial_cells
0.92952961328513	0.688876782598064	2.14617208303836	0.0698837155377516	0.342885192327823	-4.42139	Endothelial_cells__PLEKHG2	PLEKHG2	Endothelial_cells
0.712676755043282	0.817689008464212	2.14608396380364	0.0698927242664379	0.342885192327823	-4.42151	Endothelial_cells__SPATS2	SPATS2	Endothelial_cells
0.895337371196423	0.711155116853657	2.14589710600169	0.069911831236371	0.342885192327823	-4.42177	Endothelial_cells__RGS16	RGS16	Endothelial_cells
1.02350029797509	-1.03576	2.14544608264565	0.0699579718404724	0.342909422631479	-4.42241	Endothelial_cells__ARSD	ARSD	Endothelial_cells
-0.783001	1.12720895879936	-2.14391	0.0701156370405302	0.34347995708554	-4.42456	Endothelial_cells__PGRMC2	PGRMC2	Endothelial_cells
0.770858562273786	0.244774406693963	2.14309917288407	0.0701985598858697	0.343683890547114	-4.42569	Endothelial_cells__LIX1L	LIX1L	Endothelial_cells
2.30669179917484	-0.902775	2.1400054637712	0.0705169751042513	0.344089659023812	-4.43002	Endothelial_cells__UAP1	UAP1	Endothelial_cells
0.739889811212733	-0.0241475	2.13942909280232	0.0705764573381636	0.344089659023812	-4.43083	Endothelial_cells__PLEC	PLEC	Endothelial_cells
0.688639052539316	2.12062247892901	2.1392879425304	0.0705910319107576	0.344089659023812	-4.43103	Endothelial_cells__MANSC1	MANSC1	Endothelial_cells
0.927085635957594	-1.18999	2.13918123037208	0.0706020525579288	0.344089659023812	-4.43117	Endothelial_cells__EMD	EMD	Endothelial_cells
-0.89503	-1.05952	-2.13916	0.0706046719421679	0.344089659023812	-4.43121	Endothelial_cells__RDH14	RDH14	Endothelial_cells
-0.80043	-0.470858	-2.13912	0.0706081227086103	0.344089659023812	-4.43126	Endothelial_cells__ZNF623	ZNF623	Endothelial_cells
-0.874497	-0.200549	-2.13892	0.070629141880085	0.344089659023812	-4.43154	Endothelial_cells__ZNF420	ZNF420	Endothelial_cells
0.809040130434457	6.18398963840277	2.13848294300538	0.0706742105176554	0.344089659023812	-4.43215	Endothelial_cells__ARL4A	ARL4A	Endothelial_cells
-0.966449	-1.02762	-2.13831	0.0706917516253598	0.344089659023812	-4.43239	Endothelial_cells__UBA7	UBA7	Endothelial_cells
-0.738819	-0.509886	-2.13828	0.0706948596576617	0.344089659023812	-4.43243	Endothelial_cells__SSR1	SSR1	Endothelial_cells
-0.795741	-0.373156	-2.13784	0.0707409504714246	0.344112759072862	-4.43305	Endothelial_cells__CENPQ	CENPQ	Endothelial_cells
-1.25146	1.73747774898079	-2.13682	0.0708468028068583	0.344409747190086	-4.43448	Endothelial_cells__LIMA1	LIMA1	Endothelial_cells
2.10442439794501	-1.16997	2.13644945218083	0.0708847647406725	0.344409747190086	-4.435	Endothelial_cells__C19ORF53	C19ORF53	Endothelial_cells
-0.750796	-0.680865	-2.13505	0.071030242120508	0.344915230553668	-4.43696	Endothelial_cells__EIF4EBP2	EIF4EBP2	Endothelial_cells
0.915535885315866	-0.00325653	2.13455582031717	0.0710814038892873	0.344962404997398	-4.43765	Endothelial_cells__MAK16	MAK16	Endothelial_cells
-0.887918	0.530748098197299	-2.13329	0.0712127070938958	0.345230442929893	-4.43941	Endothelial_cells__ZNF507	ZNF507	Endothelial_cells
-0.790752	0.0777976827480888	-2.13271	0.0712737581259792	0.345230442929893	-4.44023	Endothelial_cells__VIPAS39	VIPAS39	Endothelial_cells
0.82714029126901	-0.797756	2.13250442123364	0.0712950440056906	0.345230442929893	-4.44052	Endothelial_cells__GSS	GSS	Endothelial_cells
-0.96979	-0.460939	-2.13202	0.0713458550320564	0.345230442929893	-4.4412	Endothelial_cells__SPSB3	SPSB3	Endothelial_cells
-1.12956	-1.91583	-2.13199	0.0713482406312692	0.345230442929893	-4.44123	Endothelial_cells__AGTRAP	AGTRAP	Endothelial_cells
0.741423470934242	-1.16762	2.1316218689243	0.0713871543819474	0.345230442929893	-4.44175	Endothelial_cells__AKR7A2	AKR7A2	Endothelial_cells
0.897571667697195	-0.0818519	2.1312405566421	0.0714269881923917	0.345230442929893	-4.44228	Endothelial_cells__GPR137	GPR137	Endothelial_cells
-0.836222	-2.65649	-2.12723	0.0718478279044526	0.346894230676643	-4.4479	Endothelial_cells__CNTRL	CNTRL	Endothelial_cells
-2.39788	-4.43208	-2.12715	0.0718560114160535	0.346894230676643	-4.44801	Endothelial_cells__FBXO6	FBXO6	Endothelial_cells
-0.786905	-0.409049	-2.12676	0.07189625710888	0.346894230676643	-4.44854	Endothelial_cells__HECTD4	HECTD4	Endothelial_cells
0.810423107434155	-1.20748	2.12503367478291	0.0720785358323808	0.347417191831563	-4.45096	Endothelial_cells__ABCC1	ABCC1	Endothelial_cells
-1.78371	0.599088890072816	-2.12492	0.072090232163072	0.347417191831563	-4.45112	Endothelial_cells__GTF3C3	GTF3C3	Endothelial_cells
-0.98209	-1.19736	-2.12431	0.0721546818520801	0.347417191831563	-4.45197	Endothelial_cells__TMEM59	TMEM59	Endothelial_cells
1.25105242726442	1.80205248054525	2.12415159694145	0.0721716117597949	0.347417191831563	-4.4522	Endothelial_cells__IL3RA	IL3RA	Endothelial_cells
-1.01749	1.22720321942136	-2.12375	0.0722139864957042	0.347420236765171	-4.45276	Endothelial_cells__CSRNP1	CSRNP1	Endothelial_cells
-1.13017	-0.976958	-2.12183	0.0724170357459477	0.348171335858633	-4.45544	Endothelial_cells__STK4	STK4	Endothelial_cells
0.880087727045142	-0.34953	2.12148451668056	0.0724537731235314	0.348171335858633	-4.45592	Endothelial_cells__TXNL4A	TXNL4A	Endothelial_cells
-0.927792	0.276819638868054	-2.12042	0.0725662069758145	0.348510410074844	-4.4574	Endothelial_cells__FKBP14	FKBP14	Endothelial_cells
-0.965343	-0.76601	-2.11977	0.0726360013787666	0.348554615158796	-4.45832	Endothelial_cells__METTL15	METTL15	Endothelial_cells
1.02030115937041	0.324521779539742	2.1191139088568	0.0727054978074498	0.348554615158796	-4.45924	Endothelial_cells__CNST	CNST	Endothelial_cells
2.01093446366666	-2.12789	2.11893530462288	0.0727244985031674	0.348554615158796	-4.45948	Endothelial_cells__TNFRSF11A	TNFRSF11A	Endothelial_cells
1.10631169039308	-1.6385	2.11870283927456	0.072749236634231	0.348554615158796	-4.45981	Endothelial_cells__MTX2	MTX2	Endothelial_cells
-0.705713	-1.69073	-2.11837	0.0727848036940991	0.348554615158796	-4.46028	Endothelial_cells__CLCN6	CLCN6	Endothelial_cells
-0.995196	2.69139095323535	-2.11729	0.0728997454200804	0.348596193609357	-4.46178	Endothelial_cells__ASRGL1	ASRGL1	Endothelial_cells
-0.834636	-0.101239	-2.1172	0.0729092181075597	0.348596193609357	-4.46191	Endothelial_cells__TMEM94	TMEM94	Endothelial_cells
0.717175943891692	0.255741151897778	2.11710842000932	0.0729191364981246	0.348596193609357	-4.46204	Endothelial_cells__USP12	USP12	Endothelial_cells
0.861171713036963	1.17390977958553	2.11617986969684	0.0730182651492616	0.348856104788591	-4.46333	Endothelial_cells__NOP56	NOP56	Endothelial_cells
1.54567148112336	-1.10364	2.11548304861814	0.0730927439184889	0.348856104788591	-4.46431	Endothelial_cells__CFH	CFH	Endothelial_cells
-1.08012	-0.516446	-2.11542	0.0730992486785178	0.348856104788591	-4.46439	Endothelial_cells__ZNF438	ZNF438	Endothelial_cells
-0.726686	-0.00225433	-2.11214	0.0734515845120697	0.350336697933499	-4.46898	Endothelial_cells__PDCL	PDCL	Endothelial_cells
0.883651007936678	0.0396494427170639	2.10962184303663	0.0737222310374942	0.351055797603103	-4.47249	Endothelial_cells__DAXX	DAXX	Endothelial_cells
-1.01216	0.263978457860759	-2.10869	0.0738223345186514	0.351055797603103	-4.47379	Endothelial_cells__PCF11	PCF11	Endothelial_cells
-0.883126	1.56862203905163	-2.10851	0.0738423473454235	0.351055797603103	-4.47405	Endothelial_cells__HLX	HLX	Endothelial_cells
-1.11975	0.047968012626595	-2.10774	0.0739256197250693	0.351055797603103	-4.47512	Endothelial_cells__CEP162	CEP162	Endothelial_cells
0.794252204000432	1.59295785951286	2.10771538470837	0.0739281506452332	0.351055797603103	-4.47515	Endothelial_cells__DDX10	DDX10	Endothelial_cells
-0.971601	0.81394717276049	-2.10714	0.073990877161463	0.351055797603103	-4.47596	Endothelial_cells__MFNG	MFNG	Endothelial_cells
1.20405204733288	0.930138137756586	2.10712420158395	0.0739921221871296	0.351055797603103	-4.47598	Endothelial_cells__EGLN3	EGLN3	Endothelial_cells
-0.970838	1.11781797673341	-2.10691	0.0740154979974713	0.351055797603103	-4.47628	Endothelial_cells__HDAC9	HDAC9	Endothelial_cells
-1.75435	1.48508042107339	-2.10681	0.0740262031487419	0.351055797603103	-4.47642	Endothelial_cells__GPER1	GPER1	Endothelial_cells
0.723292102983422	0.224874429539943	2.10661755694367	0.0740469899732718	0.351055797603103	-4.47669	Endothelial_cells__TRIM28	TRIM28	Endothelial_cells
0.895552997381897	0.815039688048503	2.10643915543927	0.0740663199076113	0.351055797603103	-4.47694	Endothelial_cells__KCNC4	KCNC4	Endothelial_cells
-0.966318	-0.331531	-2.1054	0.0741785204851119	0.351131089112662	-4.47838	Endothelial_cells__ASH2L	ASH2L	Endothelial_cells
-0.953752	0.0343480834787754	-2.10533	0.0741870677555109	0.351131089112662	-4.47849	Endothelial_cells__SLC48A1	SLC48A1	Endothelial_cells
0.745692504287957	3.62072093206412	2.10512588601306	0.0742087691636637	0.351131089112662	-4.47877	Endothelial_cells__RBM25	RBM25	Endothelial_cells
-1.71592	0.435120626090619	-2.10389	0.074343032495879	0.35136722591772	-4.48049	Endothelial_cells__CCND3	CCND3	Endothelial_cells
0.764679909893932	2.20602111974297	2.10388970152959	0.0743431076343992	0.35136722591772	-4.48049	Endothelial_cells__PA2G4	PA2G4	Endothelial_cells
0.940186051136298	1.50436550645394	2.10307885019643	0.0744313565200248	0.35144755692344	-4.48163	Endothelial_cells__SLC39A1	SLC39A1	Endothelial_cells
0.718722642821786	0.427511478532821	2.10295764941544	0.0744445563926499	0.35144755692344	-4.48179	Endothelial_cells__MICAL3	MICAL3	Endothelial_cells
1.50721227096578	-1.77224	2.10172632885562	0.0745787913171469	0.351881678079713	-4.48351	Endothelial_cells__TTF2	TTF2	Endothelial_cells
1.68348862591828	0.0402703846316472	2.10100781670171	0.0746572332604853	0.35205221100681	-4.48451	Endothelial_cells__BOK	BOK	Endothelial_cells
-0.870812	0.0343375802669298	-2.10051	0.0747113141316955	0.352071221608962	-4.48521	Endothelial_cells__CDKN2D	CDKN2D	Endothelial_cells
0.825243494815696	1.44233995305422	2.09975604880876	0.0747940894295415	0.352071221608962	-4.48626	Endothelial_cells__PRPF19	PRPF19	Endothelial_cells
0.95100172959446	5.26702030770857	2.09944873175567	0.0748277268536211	0.352071221608962	-4.48669	Endothelial_cells__HBEGF	HBEGF	Endothelial_cells
0.892730297356712	-1.46678	2.0990623984602	0.0748700344813332	0.352071221608962	-4.48723	Endothelial_cells__EHBP1L1	EHBP1L1	Endothelial_cells
-1.07341	2.28958661936083	-2.09904	0.0748727697041768	0.352071221608962	-4.48726	Endothelial_cells__CTTNBP2NL	CTTNBP2NL	Endothelial_cells
1.88621950942475	0.856262490017658	2.09769340119872	0.075020147043741	0.352440403048082	-4.48914	Endothelial_cells__ILF2	ILF2	Endothelial_cells
0.803342655767972	-2.50885	2.09754924119612	0.0750359719093118	0.352440403048082	-4.48934	Endothelial_cells__ABRACL	ABRACL	Endothelial_cells
-0.835663	0.892647897552375	-2.09634	0.075168892566608	0.352865590993727	-4.49103	Endothelial_cells__POLK	POLK	Endothelial_cells
1.0140946552064	-1.15394	2.09522514619902	0.0752915558759839	0.353242175623345	-4.49258	Endothelial_cells__MED25	MED25	Endothelial_cells
1.17161	-2.0215	2.09377071359956	0.0754519445309088	0.35334476126519	-4.49461	Endothelial_cells__COX14	COX14	Endothelial_cells
0.73924698886738	-0.381172	2.0936479096181	0.0754655024623293	0.35334476126519	-4.49478	Endothelial_cells__TSPYL2	TSPYL2	Endothelial_cells
0.745181398991739	0.0896413571902746	2.09351780715924	0.0754798688249076	0.35334476126519	-4.49496	Endothelial_cells__SAFB2	SAFB2	Endothelial_cells
0.719152464571626	-0.81251	2.09348730406061	0.0754832374780136	0.35334476126519	-4.495	Endothelial_cells__MTPN	MTPN	Endothelial_cells
0.97585415061416	-2.3224	2.09306617436641	0.0755297609004482	0.353363799873204	-4.49559	Endothelial_cells__COA6	COA6	Endothelial_cells
1.12432648635913	-0.655815	2.09232096649475	0.0756121564370719	0.353550549452668	-4.49663	Endothelial_cells__RORA	RORA	Endothelial_cells
0.918363923354498	-0.0421882	2.09142527849153	0.0757113090485445	0.353647781580704	-4.49788	Endothelial_cells__GTF3C4	GTF3C4	Endothelial_cells
-0.954102	-1.42543	-2.09137	0.0757179318487102	0.353647781580704	-4.49796	Endothelial_cells__MTMR14	MTMR14	Endothelial_cells
-0.801211	-0.646313	-2.09081	0.0757794779766317	0.353736733146105	-4.49874	Endothelial_cells__RHOT1	RHOT1	Endothelial_cells
-0.936936	-2.52398	-2.08895	0.0759859593467887	0.354501759889755	-4.50133	Endothelial_cells__TMEM106C	TMEM106C	Endothelial_cells
0.769836507698014	1.38013605475051	2.08729956919292	0.0761697053339079	0.355159920164771	-4.50363	Endothelial_cells__EBPL	EBPL	Endothelial_cells
0.715119025996994	-0.0102114	2.08662755932749	0.0762446327199409	0.355247252927815	-4.50456	Endothelial_cells__NRBP1	NRBP1	Endothelial_cells
0.842325408562504	-0.377729	2.08587645997764	0.0763284655296607	0.355247252927815	-4.50561	Endothelial_cells__CAMTA2	CAMTA2	Endothelial_cells
-0.976275	-0.0773914	-2.08574	0.0763435647000007	0.355247252927815	-4.5058	Endothelial_cells__TBC1D10A	TBC1D10A	Endothelial_cells
-1.0741	-1.27747	-2.0855	0.0763706607909031	0.355247252927815	-4.50614	Endothelial_cells__IFT81	IFT81	Endothelial_cells
0.743861324553078	-0.464253	2.08491249674925	0.0764361917535606	0.355247252927815	-4.50695	Endothelial_cells__POMGNT1	POMGNT1	Endothelial_cells
0.996675971540611	2.29563323856683	2.08483793316336	0.0764445308174596	0.355247252927815	-4.50706	Endothelial_cells__ETS2	ETS2	Endothelial_cells
1.44735149350453	3.71352789678483	2.08436438840915	0.0764975124687762	0.355282877830052	-4.50772	Endothelial_cells__CRIP2	CRIP2	Endothelial_cells
-1.30772	3.40337186174555	-2.08373	0.0765688143313009	0.355282877830052	-4.5086	Endothelial_cells__PTTG1IP	PTTG1IP	Endothelial_cells
-0.968718	0.982744015626627	-2.08363	0.0765802574585021	0.355282877830052	-4.50875	Endothelial_cells__CARD8	CARD8	Endothelial_cells
-0.871438	1.05657416681483	-2.08311	0.0766378462911557	0.355351974752807	-4.50946	Endothelial_cells__CDKN1C	CDKN1C	Endothelial_cells
-0.809493	-0.546485	-2.08163	0.0768041302021106	0.355924708057999	-4.51153	Endothelial_cells__FPGT	FPGT	Endothelial_cells
0.876497786829388	0.441500649285576	2.07987739390527	0.0770013547995243	0.356640109068693	-4.51397	Endothelial_cells__SYNE3	SYNE3	Endothelial_cells
-0.901613	5.46306740466857	-2.07851	0.077155577785908	0.357155658460574	-4.51587	Endothelial_cells__GABARAPL1	GABARAPL1	Endothelial_cells
0.925791287841094	1.46631240083749	2.07784964373271	0.0772301355229962	0.357302066680321	-4.51679	Endothelial_cells__KTN1	KTN1	Endothelial_cells
0.810219396028244	0.895941610547798	2.07735374720642	0.077286188179554	0.357362746788016	-4.51748	Endothelial_cells__SYNCRIP	SYNCRIP	Endothelial_cells
1.78844444156867	2.34919627914173	2.07695165734158	0.0773316673984875	0.357374496256308	-4.51804	Endothelial_cells__TUBB6	TUBB6	Endothelial_cells
-1.90732	-2.1356	-2.07562	0.0774819727097336	0.357785042498866	-4.51989	Endothelial_cells__P2RX7	P2RX7	Endothelial_cells
-1.22845	-2.3943	-2.07541	0.077506479830044	0.357785042498866	-4.52019	Endothelial_cells__S100A6	S100A6	Endothelial_cells
0.753015543939156	-0.0932988	2.07443111297464	0.0776173679450567	0.357971984856223	-4.52155	Endothelial_cells__PTPN23	PTPN23	Endothelial_cells
-0.903512	-0.713887	-2.07429	0.0776329968359343	0.357971984856223	-4.52174	Endothelial_cells__APOOL	APOOL	Endothelial_cells
-0.797723	0.837440900294434	-2.0729	0.0777918415347949	0.358308968217233	-4.52369	Endothelial_cells__MKLN1	MKLN1	Endothelial_cells
0.700577148086316	-0.688743	2.07289343353635	0.0777921789701478	0.358308968217233	-4.52369	Endothelial_cells__SLC39A9	SLC39A9	Endothelial_cells
-1.0353	0.23856478756996	-2.0716	0.0779396916697073	0.358341777911724	-4.52549	Endothelial_cells__IMPA1	IMPA1	Endothelial_cells
-0.752922	0.191047559917665	-2.07133	0.07797034071596	0.358341777911724	-4.52587	Endothelial_cells__PRDM4	PRDM4	Endothelial_cells
-1.43623	1.75202424554758	-2.07084	0.0780257006799474	0.358341777911724	-4.52654	Endothelial_cells__CHL1	CHL1	Endothelial_cells
0.747967624406893	0.232016395579606	2.07015439626613	0.0781045397632231	0.358341777911724	-4.5275	Endothelial_cells__QTRT1	QTRT1	Endothelial_cells
-0.8906	-0.444224	-2.06984	0.0781400539791983	0.358341777911724	-4.52793	Endothelial_cells__MRI1	MRI1	Endothelial_cells
0.978870998775764	2.40431486917265	2.06981658703857	0.078143150202105	0.358341777911724	-4.52797	Endothelial_cells__NCL	NCL	Endothelial_cells
-0.876156	0.216864035633714	-2.06977	0.0781479352327728	0.358341777911724	-4.52803	Endothelial_cells__TMEM260	TMEM260	Endothelial_cells
-1.44323	-2.85823	-2.06958	0.0781707122734321	0.358341777911724	-4.52831	Endothelial_cells__SYT17	SYT17	Endothelial_cells
-0.856326	-0.208524	-2.06943	0.0781867918644347	0.358341777911724	-4.5285	Endothelial_cells__CCDC122	CCDC122	Endothelial_cells
1.26278480979261	0.754093083782674	2.0688675527842	0.0782517234527584	0.358441989156471	-4.52929	Endothelial_cells__MLF2	MLF2	Endothelial_cells
-0.727176	-0.121792	-2.06823	0.0783251172143999	0.358499764812309	-4.53018	Endothelial_cells__MSANTD4	MSANTD4	Endothelial_cells
-1.39872	4.3791909885705	-2.06775	0.0783796774950197	0.358499764812309	-4.53084	Endothelial_cells__ZNF331	ZNF331	Endothelial_cells
1.62916184740073	-4.50285	2.06732924193573	0.078428031875328	0.358499764812309	-4.53143	Endothelial_cells__LPCAT1	LPCAT1	Endothelial_cells
0.785990243431246	0.104157549639913	2.06725431028699	0.0784366300280205	0.358499764812309	-4.53154	Endothelial_cells__MRGBP	MRGBP	Endothelial_cells
-1.06716	1.1129359187275	-2.06638	0.0785364581959004	0.35868410985461	-4.53274	Endothelial_cells__CCDC66	CCDC66	Endothelial_cells
0.759645600528022	2.33206753010694	2.06592741400227	0.0785890426359609	0.35868410985461	-4.53338	Endothelial_cells__CTSZ	CTSZ	Endothelial_cells
1.13484136984199	-0.140238	2.06551	0.0786372900935608	0.35868410985461	-4.53396	Endothelial_cells__UBE2M	UBE2M	Endothelial_cells
-1.03929	0.00839226839714562	-2.06523	0.0786697976014062	0.35868410985461	-4.53436	Endothelial_cells__MICU3	MICU3	Endothelial_cells
0.999598696121016	1.67866674069314	2.06472474728389	0.078727440783386	0.35868410985461	-4.53505	Endothelial_cells__RFC3	RFC3	Endothelial_cells
-0.846203	-0.336604	-2.06388	0.0788244194317992	0.35868410985461	-4.53622	Endothelial_cells__RBL2	RBL2	Endothelial_cells
-0.788281	-0.573298	-2.06365	0.0788507981324961	0.35868410985461	-4.53654	Endothelial_cells__FAM120AOS	FAM120AOS	Endothelial_cells
0.79564141072885	1.69899256413831	2.06346912909279	0.0788721915873266	0.35868410985461	-4.5368	Endothelial_cells__SET	SET	Endothelial_cells
0.896466573323303	0.326319893398425	2.06297030673482	0.0789297706662574	0.35868410985461	-4.53749	Endothelial_cells__HNRNPL	HNRNPL	Endothelial_cells
-0.709525	-0.49792	-2.06286	0.0789426321765128	0.35868410985461	-4.53765	Endothelial_cells__MKNK2	MKNK2	Endothelial_cells
0.821082501002592	-0.111636	2.06137357143748	0.079114363654806	0.35868410985461	-4.53971	Endothelial_cells__IARS	IARS	Endothelial_cells
0.870155866143723	-0.692218	2.06098193431015	0.079159705107804	0.35868410985461	-4.54026	Endothelial_cells__SPRY2	SPRY2	Endothelial_cells
0.83222808381107	-0.53514	2.06067791410841	0.0791949206354388	0.35868410985461	-4.54068	Endothelial_cells__CARS	CARS	Endothelial_cells
-0.669055	-0.00470607	-2.06034	0.079234209451481	0.35868410985461	-4.54115	Endothelial_cells__PRPSAP2	PRPSAP2	Endothelial_cells
-1.15845	0.758045140966426	-2.06024	0.0792457357280678	0.35868410985461	-4.54129	Endothelial_cells__SDC2	SDC2	Endothelial_cells
-0.886674	-1.15696	-2.06011	0.0792612781021568	0.35868410985461	-4.54148	Endothelial_cells__ABHD8	ABHD8	Endothelial_cells
1.5337769872409	-0.911016	2.05953494217175	0.0793274540313876	0.35868410985461	-4.54227	Endothelial_cells__STOML2	STOML2	Endothelial_cells
0.965018197906894	-0.044176	2.05931633941639	0.0793528272894546	0.35868410985461	-4.54257	Endothelial_cells__GNPNAT1	GNPNAT1	Endothelial_cells
-1.09874	0.299520527569513	-2.05929	0.079355607264072	0.35868410985461	-4.54261	Endothelial_cells__FAM204A	FAM204A	Endothelial_cells
-0.688113	-0.730447	-2.05917	0.0793692558082061	0.35868410985461	-4.54277	Endothelial_cells__MED9	MED9	Endothelial_cells
0.913009582174246	-0.779429	2.05906535308597	0.0793819692841755	0.35868410985461	-4.54292	Endothelial_cells__RRP7A	RRP7A	Endothelial_cells
1.19475518953945	-0.257977	2.05687138683762	0.0796371647498878	0.359641954537882	-4.54597	Endothelial_cells__ZBED3	ZBED3	Endothelial_cells
-1.21996	0.460599053861492	-2.05572	0.0797714533842332	0.359795019366629	-4.54757	Endothelial_cells__ILK	ILK	Endothelial_cells
-1.38852	-0.874647	-2.05533	0.0798173208251432	0.359795019366629	-4.54812	Endothelial_cells__MX1	MX1	Endothelial_cells
0.689870156925119	-0.0002635	2.05516644598126	0.0798360422894213	0.359795019366629	-4.54834	Endothelial_cells__CEP41	CEP41	Endothelial_cells
-1.43701	0.127488535537717	-2.0551	0.0798439746209496	0.359795019366629	-4.54843	Endothelial_cells__PASK	PASK	Endothelial_cells
-0.746708	0.647537805260373	-2.05386	0.0799886669969972	0.360251988861476	-4.55015	Endothelial_cells__GPATCH1	GPATCH1	Endothelial_cells
-0.821697	1.07654057240209	-2.05338	0.0800448504524748	0.360282485449613	-4.55082	Endothelial_cells__NTN4	NTN4	Endothelial_cells
-0.760565	-0.30506	-2.05294	0.0800960695520297	0.360282485449613	-4.55143	Endothelial_cells__TRAPPC2	TRAPPC2	Endothelial_cells
-0.703209	0.780203612273137	-2.05269	0.0801253010413593	0.360282485449613	-4.55177	Endothelial_cells__VSIG10	VSIG10	Endothelial_cells
0.785500294207076	-1.23913	2.05224250285047	0.0801782656070972	0.360325974431895	-4.5524	Endothelial_cells__CSK	CSK	Endothelial_cells
1.25745000419259	0.441868781016382	2.05170921118459	0.0802408402534123	0.36035852981164	-4.55314	Endothelial_cells__BOP1	BOP1	Endothelial_cells
1.07157467203082	-0.516915	2.05129497814051	0.0802894785016292	0.36035852981164	-4.55372	Endothelial_cells__CREB3	CREB3	Endothelial_cells
0.73261504467875	2.56594125523051	2.05045004433468	0.0803887795832225	0.36035852981164	-4.55489	Endothelial_cells__FAM171A1	FAM171A1	Endothelial_cells
-1.06177	-0.834039	-2.04969	0.0804781262059277	0.36035852981164	-4.55594	Endothelial_cells__ARHGEF40	ARHGEF40	Endothelial_cells
-0.791728	0.426840586740267	-2.04945	0.0805060193613949	0.36035852981164	-4.55627	Endothelial_cells__RCN2	RCN2	Endothelial_cells
0.859592528641597	-0.451653	2.04934917670341	0.0805183427411539	0.36035852981164	-4.55642	Endothelial_cells__DISC1	DISC1	Endothelial_cells
0.850924549332999	-0.498329	2.04933659868539	0.0805198242714835	0.36035852981164	-4.55644	Endothelial_cells__ACCS	ACCS	Endothelial_cells
3.19123708908366	-1.13484	2.04923422675984	0.0805318833893608	0.36035852981164	-4.55658	Endothelial_cells__EIF3F	EIF3F	Endothelial_cells
0.966960074566336	0.167770330439776	2.04884167419109	0.0805781416108823	0.360371774652001	-4.55712	Endothelial_cells__EXOSC4	EXOSC4	Endothelial_cells
-0.789876	-0.657395	-2.04741	0.080746859572872	0.360798871073223	-4.55911	Endothelial_cells__ITGB5	ITGB5	Endothelial_cells
-0.770398	-1.87777	-2.0473	0.0807603384367913	0.360798871073223	-4.55927	Endothelial_cells__PEX19	PEX19	Endothelial_cells
-0.77122	-1.85199	-2.04665	0.0808372637848059	0.360948791030547	-4.56017	Endothelial_cells__USP54	USP54	Endothelial_cells
0.908754324811385	1.70032080170347	2.04547207695404	0.0809763023920958	0.36137574520612	-4.5618	Endothelial_cells__RFTN1	RFTN1	Endothelial_cells
0.99532835569849	-0.354654	2.04466697373002	0.0810717248795102	0.361523139470093	-4.56292	Endothelial_cells__SPIN1	SPIN1	Endothelial_cells
1.33949364276058	-0.161054	2.04444316916484	0.0810982705155896	0.361523139470093	-4.56323	Endothelial_cells__SLC39A10	SLC39A10	Endothelial_cells
-0.729999	-0.264136	-2.04409	0.0811396400973367	0.361523139470093	-4.56371	Endothelial_cells__CASP7	CASP7	Endothelial_cells
-0.843882	0.0329212613743566	-2.04197	0.0813923530441621	0.362455085279059	-4.56666	Endothelial_cells__RMND5B	RMND5B	Endothelial_cells
0.859563255026625	1.09253563116566	2.04131330765805	0.081470412782804	0.362608687481967	-4.56757	Endothelial_cells__TSPAN13	TSPAN13	Endothelial_cells
0.84980553950287	0.952847684270159	2.04053885049701	0.0815627579064522	0.362806917398335	-4.56865	Endothelial_cells__RCAN1	RCAN1	Endothelial_cells
0.958148930379909	-0.376131	2.04003011479466	0.0816234754162104	0.362806917398335	-4.56935	Endothelial_cells__MYO19	MYO19	Endothelial_cells
0.845464993760024	-0.861165	2.03969096048715	0.081663978377612	0.362806917398335	-4.56982	Endothelial_cells__DUSP18	DUSP18	Endothelial_cells
-0.854573	3.98366105802478	-2.03948	0.0816893143343121	0.362806917398335	-4.57012	Endothelial_cells__BEX5	BEX5	Endothelial_cells
0.879536801125842	-0.450739	2.03799399234361	0.0818669363213061	0.363119554124585	-4.57218	Endothelial_cells__CUEDC2	CUEDC2	Endothelial_cells
1.40322808161917	-2.39867	2.03723264975372	0.0819581559753191	0.363119554124585	-4.57323	Endothelial_cells__PNMA1	PNMA1	Endothelial_cells
-0.954511	-1.71783	-2.03719	0.0819636282790801	0.363119554124585	-4.57329	Endothelial_cells__INSIG2	INSIG2	Endothelial_cells
-0.95643	0.0523286738477828	-2.03716	0.081966350526402	0.363119554124585	-4.57333	Endothelial_cells__CEP44	CEP44	Endothelial_cells
1.33492493296966	-1.38399	2.03706839226732	0.0819778495975124	0.363119554124585	-4.57346	Endothelial_cells__ZNF793	ZNF793	Endothelial_cells
0.684231189556677	0.908041459239566	2.03545266144457	0.0821718181450279	0.363600520449474	-4.5757	Endothelial_cells__BRD4	BRD4	Endothelial_cells
-0.796448	-0.609191	-2.03508	0.0822160789093305	0.363600520449474	-4.57621	Endothelial_cells__DBT	DBT	Endothelial_cells
-0.96331	1.32121875687234	-2.03507	0.0822174912274311	0.363600520449474	-4.57623	Endothelial_cells__SLFN5	SLFN5	Endothelial_cells
0.889584836139336	2.24496475087323	2.03390580487392	0.0823579455579213	0.36402824263334	-4.57784	Endothelial_cells__NDUFA13	NDUFA13	Endothelial_cells
-2.16549	-1.6421	-2.03344	0.0824144334430866	0.364084569823147	-4.57849	Endothelial_cells__DPEP2	DPEP2	Endothelial_cells
-0.702819	-0.753054	-2.03179	0.082612837798365	0.364526735925132	-4.58077	Endothelial_cells__ALMS1	ALMS1	Endothelial_cells
-0.933335	-0.554804	-2.03168	0.0826267697662758	0.364526735925132	-4.58093	Endothelial_cells__RRM1	RRM1	Endothelial_cells
1.02741911478089	0.384337250563011	2.03151939470421	0.0826459150175086	0.364526735925132	-4.58115	Endothelial_cells__PHLDA3	PHLDA3	Endothelial_cells
0.80247680930439	-1.24371	2.03099086005772	0.0827098287344016	0.364615415548954	-4.58188	Endothelial_cells__ING2	ING2	Endothelial_cells
-0.717288	0.190418558661057	-2.03014	0.0828129744491112	0.364827561918354	-4.58307	Endothelial_cells__HDAC6	HDAC6	Endothelial_cells
1.92525082269036	-1.0725	2.02901856416359	0.082948764695294	0.364827561918354	-4.58462	Endothelial_cells__AEN	AEN	Endothelial_cells
0.679618027882563	1.13853875177836	2.02895619139843	0.0829563320817072	0.364827561918354	-4.5847	Endothelial_cells__EIF4G1	EIF4G1	Endothelial_cells
-0.728437	-1.17403	-2.02842	0.083021762066368	0.364827561918354	-4.58545	Endothelial_cells__SLC35F6	SLC35F6	Endothelial_cells
-0.843454	2.28740930897219	-2.02822	0.0830461586266587	0.364827561918354	-4.58573	Endothelial_cells__EFNB2	EFNB2	Endothelial_cells
-0.770156	-1.46697	-2.0281	0.0830607575227738	0.364827561918354	-4.5859	Endothelial_cells__ZNF688	ZNF688	Endothelial_cells
0.898605597175339	0.153162261636374	2.02716725291645	0.083173667318081	0.364827561918354	-4.58718	Endothelial_cells__HNRNPA2B1	HNRNPA2B1	Endothelial_cells
-1.06358	1.28933133700736	-2.02668	0.0832333061228108	0.364827561918354	-4.58786	Endothelial_cells__ZBTB16	ZBTB16	Endothelial_cells
0.814669392575764	-0.720591	2.02644860358999	0.083261133908178	0.364827561918354	-4.58818	Endothelial_cells__SIKE1	SIKE1	Endothelial_cells
-1.07637	2.56387384526229	-2.02642	0.0832645409533347	0.364827561918354	-4.58822	Endothelial_cells__LIMS2	LIMS2	Endothelial_cells
0.996372545497539	-3.7089	2.02637206785975	0.0832704544260966	0.364827561918354	-4.58828	Endothelial_cells__HSBP1	HSBP1	Endothelial_cells
-0.73891	0.969591921564282	-2.02599	0.0833174748172838	0.364827561918354	-4.58882	Endothelial_cells__HAUS1	HAUS1	Endothelial_cells
-0.717311	-0.0761624	-2.0259	0.0833277898842713	0.364827561918354	-4.58894	Endothelial_cells__TXNDC12	TXNDC12	Endothelial_cells
0.660642774691727	0.525772671688005	2.0249441059513	0.0834445415808124	0.365106349879049	-4.59026	Endothelial_cells__ODF2L	ODF2L	Endothelial_cells
-0.859224	-0.263063	-2.02466	0.0834792002667103	0.365106349879049	-4.59066	Endothelial_cells__DCPS	DCPS	Endothelial_cells
0.651434376628524	1.0747681066892	2.02301	0.0836813292247837	0.365650647884938	-4.59295	Endothelial_cells__SAV1	SAV1	Endothelial_cells
-0.754888	-0.973339	-2.02292	0.0836915155858233	0.365650647884938	-4.59306	Endothelial_cells__MAP3K12	MAP3K12	Endothelial_cells
0.707506571915478	-2.26491	2.02255523918292	0.0837365833893002	0.365655605219908	-4.59357	Endothelial_cells__MPP1	MPP1	Endothelial_cells
0.844896067828422	-1.4817	2.02181793954837	0.0838269237735091	0.365673133248152	-4.59459	Endothelial_cells__UQCRQ	UQCRQ	Endothelial_cells
1.18899657516812	-2.88807	2.02169752782096	0.0838416868509416	0.365673133248152	-4.59476	Endothelial_cells__NBEAL1	NBEAL1	Endothelial_cells
-1.25179	0.453678817608655	-2.02145	0.0838724031443856	0.365673133248152	-4.5951	Endothelial_cells__XRN1	XRN1	Endothelial_cells
-0.733166	0.365939509968915	-2.02061	0.08397537448788	0.365930388409752	-4.59627	Endothelial_cells__SRP54	SRP54	Endothelial_cells
-0.921691	0.943404704490135	-2.01921	0.0841475205651954	0.366446541529683	-4.5982	Endothelial_cells__BAZ2B	BAZ2B	Endothelial_cells
-0.6973	3.62957743383416	-2.01893	0.084181880019795	0.366446541529683	-4.59859	Endothelial_cells__CCNL1	CCNL1	Endothelial_cells
0.754079910675324	-1.06549	2.01790780692054	0.084307645639492	0.366613308189428	-4.6	Endothelial_cells__JOSD1	JOSD1	Endothelial_cells
0.866009786081208	-0.746247	2.0175531203377	0.0843513867376591	0.366613308189428	-4.60049	Endothelial_cells__TBRG4	TBRG4	Endothelial_cells
0.734949432452935	0.596783196792358	2.01754543216228	0.0843523351174762	0.366613308189428	-4.6005	Endothelial_cells__ATF6B	ATF6B	Endothelial_cells
1.15380723198347	0.185623403901824	2.01663744836288	0.084464414428786	0.36669012191549	-4.60176	Endothelial_cells__NDST1	NDST1	Endothelial_cells
-0.823444	-0.22735	-2.01646	0.0844865078605759	0.36669012191549	-4.60201	Endothelial_cells__VPS36	VPS36	Endothelial_cells
-1.14745	-1.12606	-2.01633	0.0845021811647134	0.36669012191549	-4.60218	Endothelial_cells__SRBD1	SRBD1	Endothelial_cells
1.33519295039388	0.780493055013277	2.01564879051771	0.0845866198565814	0.366760636705228	-4.60313	Endothelial_cells__NDUFAF2	NDUFAF2	Endothelial_cells
-1.00837	2.12478553101952	-2.01533	0.0846255352601573	0.366760636705228	-4.60356	Endothelial_cells__CD58	CD58	Endothelial_cells
0.83190765598961	-0.137507	2.01513151512012	0.0846506287529428	0.366760636705228	-4.60384	Endothelial_cells__NOP2	NOP2	Endothelial_cells
-2.19946	-0.250513	-2.01441	0.0847399197380394	0.366899677602865	-4.60484	Endothelial_cells__RANBP17	RANBP17	Endothelial_cells
-0.881588	-0.720026	-2.01416	0.0847708855016592	0.366899677602865	-4.60519	Endothelial_cells__GCC2	GCC2	Endothelial_cells
0.787575539552426	0.996222860293033	2.01324712749995	0.0848842136788765	0.367199225805244	-4.60645	Endothelial_cells__PTRH2	PTRH2	Endothelial_cells
-1.55952	-0.731081	-2.01086	0.085180748501951	0.368290581704799	-4.60975	Endothelial_cells__RINT1	RINT1	Endothelial_cells
0.810270275070289	-1.92471	2.01009359315928	0.0852765492663709	0.368513353865008	-4.61081	Endothelial_cells__PSENEN	PSENEN	Endothelial_cells
-0.693423	1.53373511975009	-2.00823	0.085509315887155	0.36896653490427	-4.61339	Endothelial_cells__SYPL1	SYPL1	Endothelial_cells
-0.846943	-0.889356	-2.00789	0.0855517384826917	0.36896653490427	-4.61386	Endothelial_cells__TMEM128	TMEM128	Endothelial_cells
-1.14979	-0.995984	-2.00788	0.0855535875925325	0.36896653490427	-4.61388	Endothelial_cells__FANCM	FANCM	Endothelial_cells
0.816757	-0.669332	2.0078342428031	0.0855587423243111	0.36896653490427	-4.61394	Endothelial_cells__CSNK1G2	CSNK1G2	Endothelial_cells
-0.771711	-0.578952	-2.00667	0.0857042369909698	0.369402570935185	-4.61554	Endothelial_cells__PPM1K	PPM1K	Endothelial_cells
-0.783925	-0.491965	-2.00611	0.0857743295098398	0.36945053566043	-4.61632	Endothelial_cells__SREBF1	SREBF1	Endothelial_cells
-0.804947	-0.605113	-2.00588	0.0858041433895964	0.36945053566043	-4.61664	Endothelial_cells__MTOR	MTOR	Endothelial_cells
1.12051502721302	1.81664674947514	2.00535218539376	0.0858698177165412	0.369542136946625	-4.61737	Endothelial_cells__SVIP	SVIP	Endothelial_cells
-0.726642	0.556669888215153	-2.00492	0.0859240599231147	0.36958447066671	-4.61796	Endothelial_cells__ZNF518B	ZNF518B	Endothelial_cells
1.5777383186388	-5.32035	2.00421016539008	0.086013322623928	0.369594153604731	-4.61895	Endothelial_cells__GPR137B	GPR137B	Endothelial_cells
0.691397270309738	-1.0719	2.00411442992647	0.0860253634121675	0.369594153604731	-4.61908	Endothelial_cells__N4BP2	N4BP2	Endothelial_cells
-0.779579	7.44065487561666	-2.00384	0.0860595301797391	0.369594153604731	-4.61945	Endothelial_cells__IER2	IER2	Endothelial_cells
-0.822246	1.86203076961827	-2.00216	0.0862710682685832	0.370311552965146	-4.62177	Endothelial_cells__KAT6A	KAT6A	Endothelial_cells
-1.24047	6.35962388819758	-2.00144	0.0863620169985529	0.370510859525235	-4.62277	Endothelial_cells__BRI3	BRI3	Endothelial_cells
0.960421479179397	5.00028706997071	2.00071340525978	0.0864541994344188	0.3707152508463	-4.62378	Endothelial_cells__EIF4EBP1	EIF4EBP1	Endothelial_cells
-0.990551	1.04364574613359	-1.99906	0.08666301552368	0.371264472425269	-4.62606	Endothelial_cells__KL	KL	Endothelial_cells
0.866152519105074	0.65994478911994	1.99896891202454	0.0866749832393352	0.371264472425269	-4.62619	Endothelial_cells__RFK	RFK	Endothelial_cells
-0.963395	-0.118392	-1.99864	0.0867169997050649	0.371264472425269	-4.62664	Endothelial_cells__TTPAL	TTPAL	Endothelial_cells
3.15562259212636	0.107463299446539	1.99773363386115	0.0868316578563265	0.371264472425269	-4.62789	Endothelial_cells__BTF3	BTF3	Endothelial_cells
-1.62025	-1.09019	-1.99758	0.086850786103728	0.371264472425269	-4.6281	Endothelial_cells__SPOCK2	SPOCK2	Endothelial_cells
-0.920738	-0.419557	-1.99757	0.0868520353800416	0.371264472425269	-4.62811	Endothelial_cells__MAU2	MAU2	Endothelial_cells
0.797939284212648	-0.0243056	1.99695357390428	0.0869307398609291	0.371264472425269	-4.62897	Endothelial_cells__GANAB	GANAB	Endothelial_cells
-0.88049	0.773361266839316	-1.99663	0.0869715003805026	0.371264472425269	-4.62941	Endothelial_cells__TCF7	TCF7	Endothelial_cells
0.702964858183108	0.21519925922238	1.99644200852948	0.0869957788143371	0.371264472425269	-4.62968	Endothelial_cells__ZNF326	ZNF326	Endothelial_cells
-0.858458	1.26812384734575	-1.99619	0.0870283534424727	0.371264472425269	-4.63003	Endothelial_cells__LAP3	LAP3	Endothelial_cells
0.808585363678578	-0.520534	1.99535977399695	0.0871335296623386	0.371522729190391	-4.63117	Endothelial_cells__UBE3C	UBE3C	Endothelial_cells
-0.681649	-0.607432	-1.99401	0.0873055932484441	0.372065771944086	-4.63303	Endothelial_cells__APMAP	APMAP	Endothelial_cells
1.15072696200693	0.455309176681251	1.98877017259902	0.0879769454698489	0.374574315049416	-4.64026	Endothelial_cells__RNF145	RNF145	Endothelial_cells
-0.791728	0.0982799808942513	-1.98871	0.0879842347616974	0.374574315049416	-4.64034	Endothelial_cells__OPHN1	OPHN1	Endothelial_cells
-1.11027	-1.93944	-1.98822	0.0880479000398417	0.374653717807568	-4.64102	Endothelial_cells__TMCO3	TMCO3	Endothelial_cells
0.950342650936912	1.02808049628504	1.98769282658709	0.0881156024800858	0.374668031971763	-4.64175	Endothelial_cells__PGM5	PGM5	Endothelial_cells
-1.12535	-0.93979	-1.98724	0.0881739703273896	0.374668031971763	-4.64237	Endothelial_cells__DCTN3	DCTN3	Endothelial_cells
0.757474888942535	-1.34131	1.98612731034469	0.0883174731145469	0.374668031971763	-4.64391	Endothelial_cells__SCARB2	SCARB2	Endothelial_cells
1.38333765715376	2.36933444611556	1.98603793172524	0.0883290121123827	0.374668031971763	-4.64403	Endothelial_cells__SELP	SELP	Endothelial_cells
0.734747351733577	0.432902867961758	1.98589239774112	0.088347804091926	0.374668031971763	-4.64423	Endothelial_cells__BAIAP2L1	BAIAP2L1	Endothelial_cells
2.89696021576683	-2.68736	1.9853152911919	0.0884223614857727	0.374668031971763	-4.64503	Endothelial_cells__ODC1	ODC1	Endothelial_cells
1.32818230787135	-1.98283	1.98527485266526	0.0884275881386622	0.374668031971763	-4.64508	Endothelial_cells__ATP13A1	ATP13A1	Endothelial_cells
1.28885273903883	0.461664553101753	1.98519558528415	0.0884378342808317	0.374668031971763	-4.64519	Endothelial_cells__NDUFA8	NDUFA8	Endothelial_cells
0.79595648391879	0.0197862280293577	1.98505191716288	0.0884564078847187	0.374668031971763	-4.64539	Endothelial_cells__HSPBP1	HSPBP1	Endothelial_cells
0.862885047612018	-0.16656	1.9846311104488	0.0885108325054761	0.374707863145004	-4.64597	Endothelial_cells__PDCD6	PDCD6	Endothelial_cells
1.06671027831093	0.211551522155236	1.98410642945322	0.0885787379365334	0.374804695396933	-4.64669	Endothelial_cells__WDR46	WDR46	Endothelial_cells
0.897769823014215	-1.12964	1.9828043317687	0.0887474808158933	0.375327887617216	-4.64849	Endothelial_cells__SIPA1L3	SIPA1L3	Endothelial_cells
1.05687568857007	-0.00679224	1.98223944725937	0.0888207846516706	0.375447125777478	-4.64927	Endothelial_cells__TUBB2A	TUBB2A	Endothelial_cells
0.720504543356144	-0.143341	1.9804985597621	0.0890470720974431	0.37561131249211	-4.65167	Endothelial_cells__CBFB	CBFB	Endothelial_cells
-0.922407	-0.454653	-1.98041	0.0890582072489488	0.37561131249211	-4.65178	Endothelial_cells__JDP2	JDP2	Endothelial_cells
0.719042652815402	-0.744589	1.98005282973749	0.0891051013163747	0.37561131249211	-4.65228	Endothelial_cells__GAS8	GAS8	Endothelial_cells
-1.71324	-1.4111	-1.97967	0.0891555637967263	0.37561131249211	-4.65281	Endothelial_cells__IL7	IL7	Endothelial_cells
-0.768408	-0.478041	-1.97909	0.0892300732226076	0.37561131249211	-4.6536	Endothelial_cells__ARHGEF6	ARHGEF6	Endothelial_cells
1.07217603349651	-1.75648	1.97792793099164	0.0893822536884421	0.37561131249211	-4.65521	Endothelial_cells__TSPAN3	TSPAN3	Endothelial_cells
0.929260997812247	-0.497986	1.97706535854283	0.089495002405371	0.37561131249211	-4.6564	Endothelial_cells__TMED1	TMED1	Endothelial_cells
-1.28543	-2.14609	-1.97676	0.0895350532608973	0.37561131249211	-4.65682	Endothelial_cells__CCDC28A	CCDC28A	Endothelial_cells
1.40143271706402	0.704999891298067	1.97671720597794	0.0895405499317624	0.37561131249211	-4.65688	Endothelial_cells__TAGLN2	TAGLN2	Endothelial_cells
-1.03611	-0.727239	-1.97668	0.0895456854965148	0.37561131249211	-4.65693	Endothelial_cells__RAD51C	RAD51C	Endothelial_cells
-0.744069	-0.608512	-1.97665	0.0895498295241884	0.37561131249211	-4.65697	Endothelial_cells__PPIL2	PPIL2	Endothelial_cells
-0.806682	0.630111132245643	-1.97652	0.0895660892398005	0.37561131249211	-4.65714	Endothelial_cells__UFSP2	UFSP2	Endothelial_cells
1.28619626442181	-0.0606001	1.97647960180142	0.0895716479496862	0.37561131249211	-4.6572	Endothelial_cells__POLB	POLB	Endothelial_cells
0.77054948052605	3.63629916170384	1.97610888194795	0.0896201896506888	0.37561131249211	-4.65771	Endothelial_cells__ARHGEF15	ARHGEF15	Endothelial_cells
-0.650048	0.599974230414179	-1.97541	0.089711387294175	0.37561131249211	-4.65867	Endothelial_cells__ZNF629	ZNF629	Endothelial_cells
-0.920239	0.794710689356395	-1.97541	0.0897121810619438	0.37561131249211	-4.65868	Endothelial_cells__FBXO21	FBXO21	Endothelial_cells
0.708473540259105	0.529454149348527	1.97486253550581	0.0897835754613771	0.37561131249211	-4.65943	Endothelial_cells__SUPT6H	SUPT6H	Endothelial_cells
0.974993225510602	-1.48665	1.97471133795296	0.0898034162005318	0.37561131249211	-4.65964	Endothelial_cells__GEMIN6	GEMIN6	Endothelial_cells
-0.695319	-1.17366	-1.9746	0.0898181947122245	0.37561131249211	-4.65979	Endothelial_cells__METTL22	METTL22	Endothelial_cells
0.682372479843885	1.28745003103094	1.97448088739019	0.0898336651536016	0.37561131249211	-4.65996	Endothelial_cells__ADAMTS1	ADAMTS1	Endothelial_cells
-0.794588	-0.866002	-1.97428	0.0898604753940273	0.37561131249211	-4.66024	Endothelial_cells__TP53INP1	TP53INP1	Endothelial_cells
0.885494136939993	0.240434988701922	1.97388270391294	0.0899122296663147	0.37561131249211	-4.66078	Endothelial_cells__CDK4	CDK4	Endothelial_cells
1.17854242754558	-2.93155	1.97368444060834	0.0899382842218971	0.37561131249211	-4.66105	Endothelial_cells__ARSA	ARSA	Endothelial_cells
2.43864830495616	1.81220886809879	1.97365061225761	0.0899427304814099	0.37561131249211	-4.6611	Endothelial_cells__MRTO4	MRTO4	Endothelial_cells
1.15527579036464	-0.917112	1.97281892513018	0.0900521122446224	0.375879503616846	-4.66224	Endothelial_cells__MCTS1	MCTS1	Endothelial_cells
0.798032670093243	-0.138969	1.9723619958707	0.0901122624674627	0.375942035346713	-4.66287	Endothelial_cells__SLC12A7	SLC12A7	Endothelial_cells
0.991953609892176	-0.672305	1.97106456105555	0.0902832730324199	0.376276332824465	-4.66466	Endothelial_cells__NAV2	NAV2	Endothelial_cells
0.699959623919835	0.0210455779338042	1.97096549012995	0.0902963443865751	0.376276332824465	-4.6648	Endothelial_cells__SH3GLB1	SH3GLB1	Endothelial_cells
-0.909766	-0.0177627	-1.97015	0.0904045842665596	0.376276332824465	-4.66592	Endothelial_cells__TMEM87B	TMEM87B	Endothelial_cells
[truncated: 6,325 more rows]

## Sheet: Table S16(B_DEG)
Table S16: The Differential Genes of B Cells in the Testing Set
logFC	AveExpr	t	P.Value	adj.P.Val	B	feature	gene	cell_type
5.09274138887386	-7.305	6.24755578629138	5.79558704916212e-05	0.0429453000342913	1.92406281500854	B_cell__SUSD6	SUSD6	B_cell
6.58224031534259	14.4343306252195	4.99124717960643	0.00038625119392839	0.106005633654395	0.345894100127517	B_cell__IGHG3	IGHG3	B_cell
4.16072031969593	-7.86422	4.92551350232291	0.000429172605888239	0.106005633654395	0.255623973031081	B_cell__SIPA1L3	SIPA1L3	B_cell
3.99062297548686	-7.96628	4.44140702463095	0.000949835739066344	0.17595707066204	-0.431984	B_cell__WDFY4	WDFY4	B_cell
3.02060329581686	1.64446557796151	3.46623419548961	0.00513894128040585	0.62237683811997	-1.92308	B_cell__CD44	CD44	B_cell
3.12954612632538	-1.6119	3.43294760835135	0.00545280660725047	0.62237683811997	-1.97586	B_cell__SLC7A5	SLC7A5	B_cell
-2.73158	-3.88219	-3.36042	0.00620635143658528	0.62237683811997	-2.09113	B_cell__TBC1D22A	TBC1D22A	B_cell
3.35694223664034	-6.90346	3.31601658395029	0.00671931809036405	0.62237683811997	-2.16186	B_cell__ZHX2	ZHX2	B_cell
-3.24312	-5.06998	-3.18567	0.00848875216991499	0.698907261989667	-2.37007	B_cell__MCTP2	MCTP2	B_cell
2.43818879386636	-4.22781	3.00645241409449	0.0117198717472887	0.762089661701522	-2.65719	B_cell__SEMA4D	SEMA4D	B_cell
3.34762660167462	-6.90905	2.99946569830445	0.0118683758475467	0.762089661701522	-2.66839	B_cell__CDK13	CDK13	B_cell
2.99957244672083	-7.11789	2.96076293932618	0.0127259338307902	0.762089661701522	-2.73042	B_cell__IMMP2L	IMMP2L	B_cell
2.75470663409293	-0.36141	2.90110741723793	0.0141711214624479	0.762089661701522	-2.826	B_cell__IRF8	IRF8	B_cell
2.89656212520035	-7.17969	2.8862625013425	0.0145555942276305	0.762089661701522	-2.84977	B_cell__KDM4C	KDM4C	B_cell
-2.5714	-6.90346	-2.83223	0.0160450050017153	0.762089661701522	-2.93623	B_cell__RASA1	RASA1	B_cell
4.2869550508676	15.2096442528114	2.81822663493705	0.0164553773106941	0.762089661701522	-2.95862	B_cell__IGHG1	IGHG1	B_cell
2.56049961083026	9.37437931227397	2.77148245465863	0.017901940376296	0.780313989343256	-3.0333	B_cell__CD74	CD74	B_cell
-2.30403	-4.18711	-2.68832	0.0207945358857825	0.849450216653841	-3.16583	B_cell__CDK6	CDK6	B_cell
-2.4376	-5.30455	-2.64696	0.0224008676306504	0.849450216653841	-3.23155	B_cell__COG5	COG5	B_cell
3.13484243831735	-6.36576	2.63404164521374	0.0229271313536799	0.849450216653841	-3.25204	B_cell__ATP9B	ATP9B	B_cell
-2.18564	-4.43549	-2.53712	0.0272837455865099	0.88336303815346	-3.40528	B_cell__HDAC9	HDAC9	B_cell
3.10067202220053	2.31020291885938	2.53356393914622	0.0274582938501153	0.88336303815346	-3.41088	B_cell__JUND	JUND	B_cell
2.31482887080311	-3.04677	2.50338926546718	0.0289829057601976	0.88336303815346	-3.45836	B_cell__APBB1IP	APBB1IP	B_cell
2.34887790564751	-4.95237	2.4795712899693	0.0302444675792658	0.88336303815346	-3.49575	B_cell__NFX1	NFX1	B_cell
-2.11913	-2.84376	-2.46438	0.0310771270503599	0.88336303815346	-3.51956	B_cell__DNM2	DNM2	B_cell
-2.3008	0.432001031284108	-2.42485	0.0333492925249735	0.88336303815346	-3.58135	B_cell__SMCHD1	SMCHD1	B_cell
2.20512270637236	-5.03862	2.41258264043972	0.0340863519151144	0.88336303815346	-3.60047	B_cell__EIF4G3	EIF4G3	B_cell
1.99138352029777	-3.13016	2.40047130535728	0.034829836779877	0.88336303815346	-3.61933	B_cell__CHST11	CHST11	B_cell
2.13815679942251	-5.52075	2.39520596800852	0.035157944851489	0.88336303815346	-3.62752	B_cell__TCF3	TCF3	B_cell
2.33439170283673	0.583989220815219	2.37489573075608	0.0364518491683921	0.88336303815346	-3.65907	B_cell__UPF2	UPF2	B_cell
2.0484550790762	-4.0197	2.36717341360986	0.0369558086137075	0.88336303815346	-3.67105	B_cell__DOCK2	DOCK2	B_cell
1.98538313459204	-2.05541	2.32273903744197	0.0399890063454609	0.908738334083943	-3.73977	B_cell__DAP	DAP	B_cell
-2.01316	-5.04989	-2.29286	0.042162313327667	0.908738334083943	-3.78577	B_cell__VTI1A	VTI1A	B_cell
-1.98069	-0.342761	-2.28842	0.0424943054268775	0.908738334083943	-3.79258	B_cell__SRP54	SRP54	B_cell
-2.21073	0.526826648378152	-2.28275	0.0429228632833171	0.908738334083943	-3.80129	B_cell__EAF2	EAF2	B_cell
-1.88003	-5.56369	-2.21271	0.0485647203188073	0.954714565976414	-3.90823	B_cell__NLRC5	NLRC5	B_cell
-2.28904	-5.69842	-2.20693	0.0490609580918346	0.954714565976414	-3.91701	B_cell__FAF1	FAF1	B_cell
1.92746890511586	-3.27919	2.16656376802558	0.0526623061269255	0.954714565976414	-3.9781	B_cell__PPP4R3A	PPP4R3A	B_cell
2.77565171188527	-6.13932	2.15502847976394	0.0537366693657771	0.954714565976414	-3.99548	B_cell__HERC1	HERC1	B_cell
-1.83658	-0.425745	-2.14353	0.0548283345875463	0.954714565976414	-4.01277	B_cell__BCL2L11	BCL2L11	B_cell
-1.86985	-1.57523	-2.13297	0.0558494871713302	0.954714565976414	-4.02863	B_cell__USO1	USO1	B_cell
-1.79141	-4.72887	-2.12395	0.0567357298382942	0.954714565976414	-4.04214	B_cell__ERC1	ERC1	B_cell
2.1188725796709	-2.64629	2.09662922764946	0.0595018760522808	0.954714565976414	-4.08295	B_cell__RUBCN	RUBCN	B_cell
1.7850269425298	-5.73263	2.07690924909998	0.0615770814173081	0.954714565976414	-4.11228	B_cell__PPP6R3	PPP6R3	B_cell
-2.05669	-6.59464	-2.04506	0.0650730304017041	0.954714565976414	-4.15942	B_cell__MBD5	MBD5	B_cell
2.26375722235908	8.94681200008419	2.03853172312724	0.0658121608632751	0.954714565976414	-4.16905	B_cell__UBC	UBC	B_cell
-1.81539	3.47642040747707	-2.03623	0.0660744119133841	0.954714565976414	-4.17244	B_cell__UBE2J1	UBE2J1	B_cell
-1.81518	-2.79887	-2.017	0.0683063185126567	0.954714565976414	-4.20071	B_cell__ZCCHC7	ZCCHC7	B_cell
2.22487606269086	-4.43309	2.01683747322327	0.0683254048232004	0.954714565976414	-4.20095	B_cell__WDR70	WDR70	B_cell
1.6688850018657	-3.32366	2.00428477474364	0.0698202838218449	0.954714565976414	-4.21934	B_cell__ACYP2	ACYP2	B_cell
1.61854653251523	2.44447803070483	1.99624457192759	0.0707937478419367	0.954714565976414	-4.23109	B_cell__CTSS	CTSS	B_cell
1.65418732295035	-0.717252	1.99487435545524	0.0709609024541695	0.954714565976414	-4.23309	B_cell__CPEB4	CPEB4	B_cell
2.00741417604446	6.32188807239675	1.97403267601274	0.0735491352968844	0.954714565976414	-4.26346	B_cell__VIM	VIM	B_cell
-1.59498	-3.47778	-1.92069	0.0805786599823252	0.954714565976414	-4.34053	B_cell__FLI1	FLI1	B_cell
1.99517542609771	-4.83449	1.90269038168716	0.0830864780757048	0.954714565976414	-4.36631	B_cell__HUWE1	HUWE1	B_cell
1.68548510163283	-3.42438	1.90010081699656	0.083453232750336	0.954714565976414	-4.37001	B_cell__CNOT1	CNOT1	B_cell
2.0129824618606	-4.92489	1.88702803037822	0.0853275486084856	0.954714565976414	-4.38866	B_cell__FBXW11	FBXW11	B_cell
-1.93555	-3.29505	-1.8807	0.0862484575052839	0.954714565976414	-4.39766	B_cell__UBR5	UBR5	B_cell
-1.86843	-3.59565	-1.87663	0.0868463451195663	0.954714565976414	-4.40345	B_cell__STAG1	STAG1	B_cell
1.76529136823489	1.34438705000048	1.87479185407631	0.0871168839375024	0.954714565976414	-4.40606	B_cell__HIST1H1C	HIST1H1C	B_cell
2.03162164322146	-2.86433	1.8657135389099	0.0884666077133274	0.954714565976414	-4.41893	B_cell__MAPKAPK2	MAPKAPK2	B_cell
1.87589275406735	-4.90606	1.86363974241987	0.0887776071240071	0.954714565976414	-4.42186	B_cell__USP9X	USP9X	B_cell
1.55935486279618	-0.604433	1.85442481751272	0.0901716773900114	0.954714565976414	-4.43489	B_cell__IQGAP1	IQGAP1	B_cell
2.43274741975755	-3.73658	1.85405273535194	0.0902283858955462	0.954714565976414	-4.43542	B_cell__MAP3K2	MAP3K2	B_cell
2.07961578523794	-1.41478	1.85378318662163	0.0902694878009856	0.954714565976414	-4.4358	B_cell__CHD9	CHD9	B_cell
1.56723072999708	0.96197128538619	1.85087003081133	0.0907147916117128	0.954714565976414	-4.43991	B_cell__FNBP1	FNBP1	B_cell
-1.63526	-5.56973	-1.83991	0.0924084117648201	0.954714565976414	-4.45535	B_cell__DIDO1	DIDO1	B_cell
-1.52651	-3.72059	-1.83755	0.0927765871859399	0.954714565976414	-4.45866	B_cell__DMXL1	DMXL1	B_cell
-1.69574	-0.921356	-1.83608	0.0930069492882979	0.954714565976414	-4.46073	B_cell__SND1	SND1	B_cell
1.56876490868272	-5.19142	1.8292184055673	0.0940878493024428	0.954714565976414	-4.47036	B_cell__EHBP1L1	EHBP1L1	B_cell
1.81626055791694	-3.78787	1.81588979756212	0.0962207413066254	0.954714565976414	-4.48902	B_cell__KDM2A	KDM2A	B_cell
1.48297759843513	0.329188627569246	1.80649299363061	0.0977507873891254	0.954714565976414	-4.50214	B_cell__LRRFIP1	LRRFIP1	B_cell
-1.75598	-5.30129	-1.80155	0.0985644636530373	0.954714565976414	-4.50902	B_cell__BTAF1	BTAF1	B_cell
1.49465749565267	-3.4282	1.79931545127983	0.0989343307661448	0.954714565976414	-4.51213	B_cell__GPATCH8	GPATCH8	B_cell
-1.52251	-5.01908	-1.79393	0.0998314923772428	0.954714565976414	-4.51962	B_cell__SUGP2	SUGP2	B_cell
1.52957053874784	-6.55687	1.79164025512042	0.100214307044508	0.954714565976414	-4.52279	B_cell__PPP1R16B	PPP1R16B	B_cell
1.49434495190074	8.59336902338205	1.78553780425449	0.101242689877692	0.954714565976414	-4.53125	B_cell__CYBA	CYBA	B_cell
2.8945647188434	-5.25487	1.78245856703819	0.101765220957322	0.954714565976414	-4.53552	B_cell__KDM5D	KDM5D	B_cell
-1.47684	-1.57681	-1.76978	0.10394169377139	0.954714565976414	-4.55302	B_cell__PCF11	PCF11	B_cell
1.9865204864739	-3.33335	1.76471812664286	0.104823476189665	0.954714565976414	-4.56001	B_cell__NEDD9	NEDD9	B_cell
-2.12862	-3.19032	-1.76165	0.105360064768757	0.954714565976414	-4.56422	B_cell__CLEC2D	CLEC2D	B_cell
1.44662263628887	7.35013524768779	1.75456004121717	0.106611740904968	0.954714565976414	-4.57397	B_cell__CXCR4	CXCR4	B_cell
-1.78432	-0.204892	-1.75272	0.106938338699113	0.954714565976414	-4.57649	B_cell__ANAPC5	ANAPC5	B_cell
1.44953102028013	-3.78538	1.7421778088995	0.108828696690094	0.959022759601183	-4.59093	B_cell__ATP2A3	ATP2A3	B_cell
1.5715188480762	-3.3048	1.71332534634362	0.114156071571891	0.959022759601183	-4.63021	B_cell__RERE	RERE	B_cell
2.07108512769218	0.61543490353911	1.70121252334772	0.116461371895187	0.959022759601183	-4.64659	B_cell__AHNAK	AHNAK	B_cell
1.70940803982589	7.06602437264887	1.69573775948931	0.117516903679896	0.959022759601183	-4.65398	B_cell__KLF6	KLF6	B_cell
1.57063190118371	-0.550751	1.68376866695233	0.119854313479723	0.959022759601183	-4.67007	B_cell__YTHDC1	YTHDC1	B_cell
1.36590429238672	-6.65507	1.67148312832917	0.122296487404188	0.959022759601183	-4.68652	B_cell__GBF1	GBF1	B_cell
-1.48273	-2.70702	-1.65815	0.12499773692583	0.959022759601183	-4.70431	B_cell__CLTC	CLTC	B_cell
1.89141558870557	6.62276633923386	1.65710167589211	0.125211386573668	0.959022759601183	-4.7057	B_cell__TSC22D3	TSC22D3	B_cell
-1.42516	-2.37618	-1.64778	0.127133093487045	0.959022759601183	-4.71807	B_cell__FOXO3	FOXO3	B_cell
1.52924768765471	-1.84609	1.63989001691532	0.128780732165498	0.959022759601183	-4.72852	B_cell__NR3C1	NR3C1	B_cell
-1.47242	-6.24408	-1.63777	0.129226738001414	0.959022759601183	-4.73132	B_cell__FCRL1	FCRL1	B_cell
2.02921873505312	-3.03018	1.63392685776956	0.130038184428477	0.959022759601183	-4.73639	B_cell__MDM2	MDM2	B_cell
1.4207003337322	-4.83831	1.63038103155938	0.130791020318301	0.959022759601183	-4.74107	B_cell__LPP	LPP	B_cell
1.46639116858535	-0.314985	1.62700214503133	0.131511986295355	0.959022759601183	-4.74551	B_cell__ZBTB38	ZBTB38	B_cell
1.90724693116648	7.69018060035714	1.62338513805531	0.132287640576158	0.959022759601183	-4.75027	B_cell__FOS	FOS	B_cell
1.47744320584744	-5.24621	1.6039646085362	0.136521536219318	0.959022759601183	-4.7757	B_cell__PUM2	PUM2	B_cell
1.77994023406163	-4.48063	1.5978554678173	0.137877777595267	0.959022759601183	-4.78366	B_cell__CHD6	CHD6	B_cell
-1.3955	-2.51417	-1.58127	0.141620309758515	0.959022759601183	-4.80519	B_cell__SPEN	SPEN	B_cell
1.57808758597063	-7.97078	1.56384765397453	0.145645217811732	0.959022759601183	-4.82765	B_cell__DIP2B	DIP2B	B_cell
1.83827003930784	-4.66505	1.55666971081691	0.147332585618134	0.959022759601183	-4.83686	B_cell__TGFBR2	TGFBR2	B_cell
1.55271136224351	-0.31819	1.55467500942898	0.147804501588761	0.959022759601183	-4.83941	B_cell__EHMT1	EHMT1	B_cell
1.54523335249019	-3.32057	1.54808104773651	0.149373891071748	0.959022759601183	-4.84785	B_cell__MDFIC	MDFIC	B_cell
1.49887726173159	5.97681799115953	1.54427234099573	0.150286952309323	0.959022759601183	-4.85271	B_cell__ZFP36	ZFP36	B_cell
1.4800292257979	4.18902034663162	1.53186774367405	0.153294321425785	0.959022759601183	-4.86848	B_cell__PIM2	PIM2	B_cell
1.34542355852495	-2.31686	1.52796849036105	0.154250350090705	0.959022759601183	-4.87343	B_cell__AFF4	AFF4	B_cell
-1.25448	-4.85826	-1.51477	0.157524914585591	0.959022759601183	-4.8901	B_cell__GATAD2B	GATAD2B	B_cell
1.35681631255554	0.138310148058579	1.50943384574959	0.158865442174876	0.959022759601183	-4.89681	B_cell__KLF13	KLF13	B_cell
-1.38291	0.629071487980018	-1.50924	0.15891545150635	0.959022759601183	-4.89706	B_cell__FAM3C	FAM3C	B_cell
-2.5714	-6.90346	-1.50596	0.159743682012433	0.959022759601183	-4.90118	B_cell__TRAPPC10	TRAPPC10	B_cell
1.60433271885727	-0.963299	1.50577653289319	0.159790023896939	0.959022759601183	-4.9014	B_cell__HP1BP3	HP1BP3	B_cell
1.25876393017654	-1.04837	1.50076098108369	0.161065495474933	0.959022759601183	-4.90769	B_cell__PRPF4B	PRPF4B	B_cell
-1.4185	-1.65678	-1.49641	0.162180089916605	0.959022759601183	-4.91314	B_cell__COPB1	COPB1	B_cell
1.28399585927825	-4.92033	1.49458466795063	0.16264816062262	0.959022759601183	-4.91542	B_cell__CEP85L	CEP85L	B_cell
-1.21521	-2.53275	-1.48882	0.164136613585498	0.959022759601183	-4.9226	B_cell__PBRM1	PBRM1	B_cell
1.19629057311192	-0.539724	1.48819030893367	0.16430073811702	0.959022759601183	-4.92339	B_cell__BLNK	BLNK	B_cell
1.43601522752932	-4.82912	1.48778204777965	0.164406737321244	0.959022759601183	-4.9239	B_cell__CUL3	CUL3	B_cell
1.29893470417981	-3.65631	1.48233205823487	0.165827368393876	0.959022759601183	-4.93068	B_cell__FAM120A	FAM120A	B_cell
-1.26417	-0.539181	-1.47934	0.166610952865088	0.959022759601183	-4.93439	B_cell__CLINT1	CLINT1	B_cell
1.32961952663068	-3.44994	1.47731457947834	0.167144531275471	0.959022759601183	-4.93691	B_cell__COMMD10	COMMD10	B_cell
-1.32415	-4.28412	-1.47537	0.16765833135751	0.959022759601183	-4.93932	B_cell__DENND5B	DENND5B	B_cell
1.27458023099285	-3.89035	1.47189602059958	0.168577015189146	0.959022759601183	-4.94362	B_cell__RICTOR	RICTOR	B_cell
-1.19399	-0.191109	-1.45361	0.173488317991808	0.959022759601183	-4.96614	B_cell__ZNF207	ZNF207	B_cell
1.25115628907578	-2.33155	1.45318195411585	0.173605189717041	0.959022759601183	-4.96666	B_cell__RAPGEF1	RAPGEF1	B_cell
1.22644425680604	-1.06776	1.44862609877765	0.174848404268103	0.959022759601183	-4.97224	B_cell__RNF149	RNF149	B_cell
1.17210518062485	0.384784053544054	1.4480152600024	0.175015665026857	0.959022759601183	-4.97299	B_cell__ACAP1	ACAP1	B_cell
-1.19871	-1.74433	-1.44548	0.175711431379378	0.959022759601183	-4.97609	B_cell__UBE2H	UBE2H	B_cell
-1.30766	-2.76723	-1.44182	0.176719560296818	0.959022759601183	-4.98056	B_cell__PTK2B	PTK2B	B_cell
-1.24389	-4.80775	-1.44	0.177223858320095	0.959022759601183	-4.98278	B_cell__NT5C2	NT5C2	B_cell
1.33102012866904	0.0306196956061042	1.42897405172278	0.18029800759897	0.959022759601183	-4.99619	B_cell__SLC38A2	SLC38A2	B_cell
-1.18082	-1.01696	-1.42485	0.181460580621792	0.959022759601183	-5.00119	B_cell__PHIP	PHIP	B_cell
1.48139996470638	5.90358010938815	1.41967311757369	0.182926853583882	0.959022759601183	-5.00744	B_cell__DERL3	DERL3	B_cell
1.37784787613565	-5.20488	1.41930805817897	0.18303069110213	0.959022759601183	-5.00788	B_cell__MKLN1	MKLN1	B_cell
1.84225109607619	-6.69936	1.41628317806191	0.183893001026006	0.959022759601183	-5.01153	B_cell__MON2	MON2	B_cell
-1.41296	-1.2188	-1.41047	0.185560731567614	0.959022759601183	-5.01854	B_cell__CAPN2	CAPN2	B_cell
1.35517587547992	1.84167320355446	1.38984693749719	0.191575707953442	0.959022759601183	-5.0432	B_cell__CFLAR	CFLAR	B_cell
1.25055855255235	-0.0176573	1.36682014825529	0.198484772205949	0.959022759601183	-5.07046	B_cell__PECAM1	PECAM1	B_cell
1.54887567479588	1.75462872910454	1.36236872925395	0.199844047631554	0.959022759601183	-5.07569	B_cell__H1FX	H1FX	B_cell
-1.2824	0.897894324396248	-1.36156	0.20009241754431	0.959022759601183	-5.07664	B_cell__DNAJC3	DNAJC3	B_cell
1.15886936633404	-1.66741	1.35534857822856	0.202003412779681	0.959022759601183	-5.08392	B_cell__RAB10	RAB10	B_cell
1.2322408894418	2.41661454315389	1.35200347535296	0.203039138200571	0.959022759601183	-5.08783	B_cell__ERLEC1	ERLEC1	B_cell
1.14771722468798	-0.104365	1.3510079836081	0.203348214982572	0.959022759601183	-5.08899	B_cell__AKAP13	AKAP13	B_cell
-1.50241	-4.14809	-1.34566	0.205016371057405	0.959022759601183	-5.09523	B_cell__SETX	SETX	B_cell
1.30284582898346	-5.57999	1.33965990857356	0.206899129129431	0.959022759601183	-5.1022	B_cell__TAOK1	TAOK1	B_cell
1.66524715998011	-4.36148	1.32700402881754	0.210919493951831	0.959022759601183	-5.11683	B_cell__FCHSD2	FCHSD2	B_cell
-1.1513	-1.05919	-1.31748	0.213986319176853	0.959022759601183	-5.12778	B_cell__SCFD1	SCFD1	B_cell
-1.31341	-7.59169	-1.31423	0.215040828918834	0.959022759601183	-5.1315	B_cell__KDM6A	KDM6A	B_cell
1.90635445142063	-6.3308	1.31300711537244	0.215440487091571	0.959022759601183	-5.1329	B_cell__FAM13B	FAM13B	B_cell
-1.07858	-3.28744	-1.31285	0.215491015077654	0.959022759601183	-5.13308	B_cell__ZFC3H1	ZFC3H1	B_cell
-1.56389	-2.4657	-1.30858	0.21688806123902	0.959022759601183	-5.13797	B_cell__MARCH7	2025-03-07	B_cell
1.22417205225253	-0.997183	1.30788553661569	0.217114484678012	0.959022759601183	-5.13876	B_cell__COBLL1	COBLL1	B_cell
-1.44586	-3.74949	-1.29905	0.220027988823566	0.959022759601183	-5.14881	B_cell__EPB41	EPB41	B_cell
-1.34122	-2.37701	-1.29871	0.220139272388131	0.959022759601183	-5.14919	B_cell__LRMP	LRMP	B_cell
-1.24614	-0.0031802	-1.29351	0.221870828324187	0.959022759601183	-5.15509	B_cell__SPATS2	SPATS2	B_cell
1.15934825265056	-2.29704	1.28877779214554	0.223453986345426	0.959022759601183	-5.16044	B_cell__ARHGAP24	ARHGAP24	B_cell
1.23477525933088	6.22217751604143	1.27925706072833	0.226668553644916	0.959022759601183	-5.17116	B_cell__BTG2	BTG2	B_cell
2.33394793440496	-4.84183	1.27451587926646	0.228283305538478	0.959022759601183	-5.17647	B_cell__SMG1	SMG1	B_cell
1.1731283335028	-1.81444	1.27433789653743	0.228344104027406	0.959022759601183	-5.17667	B_cell__MYH9	MYH9	B_cell
1.47628621655217	-4.47486	1.26615385245931	0.231153950423082	0.959022759601183	-5.18581	B_cell__TTC37	TTC37	B_cell
1.07910870518088	2.80519854435386	1.26581208918212	0.231271894297789	0.959022759601183	-5.1862	B_cell__SQSTM1	SQSTM1	B_cell
1.12513160434702	-2.44903	1.26219931943492	0.232521651925915	0.959022759601183	-5.19022	B_cell__ATM	ATM	B_cell
-1.02815	-4.27092	-1.25307	0.235703996804562	0.959022759601183	-5.20034	B_cell__PICALM	PICALM	B_cell
1.92618917805867	-5.83589	1.24486654696232	0.238593498095507	0.959022759601183	-5.20939	B_cell__UBR4	UBR4	B_cell
-1.11009	-4.91376	-1.24236	0.23948228147227	0.959022759601183	-5.21215	B_cell__LENG8	LENG8	B_cell
-1.06043	7.21001803367159	-1.23507	0.242080216562847	0.959022759601183	-5.22014	B_cell__HSP90B1	HSP90B1	B_cell
-1.19922	-4.80284	-1.23007	0.243876179811793	0.959022759601183	-5.2256	B_cell__HERC4	HERC4	B_cell
1.50492856492683	-3.22526	1.22184591929189	0.246853904558756	0.959022759601183	-5.23455	B_cell__OSBPL8	OSBPL8	B_cell
1.24891009562505	3.62726677033121	1.21683608161996	0.24868145841714	0.959022759601183	-5.23998	B_cell__ANKRD28	ANKRD28	B_cell
1.04207367013578	-2.86438	1.21663616779969	0.248754608441604	0.959022759601183	-5.2402	B_cell__CCDC88A	CCDC88A	B_cell
-0.981421	-3.525	-1.21274	0.250184653243762	0.959022759601183	-5.24441	B_cell__ADK	ADK	B_cell
1.06151175889249	-6.8377	1.21246738061403	0.250283903723049	0.959022759601183	-5.2447	B_cell__TRIO	TRIO	B_cell
-1.61412	-6.51706	-1.20569	0.252787713745889	0.959022759601183	-5.25201	B_cell__RIC1	RIC1	B_cell
-1.01378	-1.24185	-1.20544	0.252878001200033	0.959022759601183	-5.25227	B_cell__UBE2K	UBE2K	B_cell
0.976439954675487	3.00130366966035	1.20451504338569	0.253221878030271	0.959022759601183	-5.25326	B_cell__CD37	CD37	B_cell
1.28265266718387	-3.75567	1.20007325820465	0.254874746449735	0.959022759601183	-5.25803	B_cell__MAP4	MAP4	B_cell
1.08996498750001	0.362852395196296	1.19954337807035	0.255072493227271	0.959022759601183	-5.25859	B_cell__IFNAR2	IFNAR2	B_cell
-1.15319	-3.10319	-1.19625	0.256305527164223	0.959022759601183	-5.26212	B_cell__SMARCC1	SMARCC1	B_cell
0.99174801958062	-1.81623	1.1921316446112	0.257851225643085	0.959022759601183	-5.26651	B_cell__WAC	WAC	B_cell
0.98462778140589	-0.589435	1.19208776606793	0.257867747026509	0.959022759601183	-5.26656	B_cell__SNRNP70	SNRNP70	B_cell
1.05519288285827	0.278979827056543	1.19006161405774	0.258631554813339	0.959022759601183	-5.26871	B_cell__POU2F2	POU2F2	B_cell
1.03774018722786	-2.18205	1.17501872718492	0.264358221197654	0.959022759601183	-5.28464	B_cell__NEMF	NEMF	B_cell
-1.17174	-5.02804	-1.17461	0.264514614998015	0.959022759601183	-5.28507	B_cell__MYO5A	MYO5A	B_cell
0.999437001410247	-0.0054912	1.17404518124384	0.26473224316534	0.959022759601183	-5.28567	B_cell__PPP2R5C	PPP2R5C	B_cell
1.14167460966696	-1.21971	1.17369608667897	0.264866461185018	0.959022759601183	-5.28604	B_cell__THEMIS2	THEMIS2	B_cell
0.970879888614768	2.50099308278002	1.17100822952427	0.265901661707889	0.959022759601183	-5.28886	B_cell__SRSF5	SRSF5	B_cell
1.17197757356784	-6.77143	1.17088895266227	0.265947673320578	0.959022759601183	-5.28899	B_cell__TCF12	TCF12	B_cell
-1.13648	-1.45875	-1.16959	0.266448744138624	0.959022759601183	-5.29035	B_cell__BCL2	BCL2	B_cell
1.01689100865805	-0.570077	1.16470991649261	0.268339804040178	0.959022759601183	-5.29547	B_cell__PDCD4	PDCD4	B_cell
-1.07106	-3.13683	-1.15994	0.27019662275139	0.959022759601183	-5.30045	B_cell__USP47	USP47	B_cell
0.963713097467911	1.94074	1.15910806610664	0.270522990557977	0.959022759601183	-5.30132	B_cell__ZFP36L1	ZFP36L1	B_cell
-0.999443	-2.12074	-1.15255	0.273098137949287	0.959022759601183	-5.30815	B_cell__ABI1	ABI1	B_cell
1.21909010975635	-0.278672	1.1523885564013	0.273160006755005	0.959022759601183	-5.30832	B_cell__CAST	CAST	B_cell
1.07068196669641	-4.71822	1.14682783950538	0.275357355511108	0.959022759601183	-5.31408	B_cell__AP3B1	AP3B1	B_cell
-0.969821	-3.92543	-1.14477	0.276173032134754	0.959022759601183	-5.3162	B_cell__DCAF8	DCAF8	B_cell
-0.924339	-0.0819055	-1.1366	0.279435644499329	0.959022759601183	-5.32462	B_cell__PNN	PNN	B_cell
-1.42217	0.707616786892233	-1.13603	0.279662743170254	0.959022759601183	-5.3252	B_cell__PELI1	PELI1	B_cell
-1.02875	-3.6099	-1.13381	0.280555953844403	0.959022759601183	-5.32749	B_cell__KAT6A	KAT6A	B_cell
0.960555290057851	6.63461856785181	1.13218298352561	0.281210001426001	0.959022759601183	-5.32915	B_cell__OAZ1	OAZ1	B_cell
1.14877070927097	0.0996443011866334	1.12961766693898	0.282245026159908	0.959022759601183	-5.33178	B_cell__KTN1	KTN1	B_cell
1.11438330187694	0.489483044786747	1.12701307661923	0.283298901554003	0.959022759601183	-5.33444	B_cell__VOPP1	VOPP1	B_cell
-2.19507	-10.2347	-1.12513	0.28406455408129	0.959022759601183	-5.33636	B_cell__BTBD9	BTBD9	B_cell
0.897774314789741	0.652953875766021	1.12195328246188	0.285354873107016	0.959022759601183	-5.33959	B_cell__CD47	CD47	B_cell
1.02393755812124	2.37550095108767	1.12163267008921	0.285485535020601	0.959022759601183	-5.33992	B_cell__TRA2B	TRA2B	B_cell
1.52512215213852	-6.88964	1.11820915232654	0.286883621222098	0.959022759601183	-5.34339	B_cell__SIK3	SIK3	B_cell
1.0718806805258	2.90096819691537	1.1161258639981	0.287736959557255	0.959022759601183	-5.3455	B_cell__S100A6	S100A6	B_cell
0.918929509610513	-0.276349	1.1139619783921	0.288625373163564	0.959022759601183	-5.34769	B_cell__PTPN2	PTPN2	B_cell
-0.976751	-4.42804	-1.10893	0.290699138292602	0.959022759601183	-5.35277	B_cell__ZFAND3	ZFAND3	B_cell
-1.27807	-2.97785	-1.09965	0.294553427020499	0.959022759601183	-5.36209	B_cell__KMT2C	KMT2C	B_cell
-0.960077	-2.6998	-1.09825	0.295139556235852	0.959022759601183	-5.36349	B_cell__GNB1	GNB1	B_cell
1.00468087415692	-1.89139	1.09754798958051	0.295432948752811	0.959022759601183	-5.36419	B_cell__RNF19A	RNF19A	B_cell
0.946162124170053	-1.5964	1.09374160307841	0.297028974909355	0.959022759601183	-5.36799	B_cell__EML4	EML4	B_cell
1.07812424372832	-0.867941	1.08862770990229	0.299183558744073	0.959022759601183	-5.37308	B_cell__SYTL1	SYTL1	B_cell
0.985343846415168	7.72624957603185	1.08741367010228	0.299696797092397	0.959022759601183	-5.37428	B_cell__XBP1	XBP1	B_cell
0.960148094319459	1.28602722895402	1.08728075200717	0.299753029115182	0.959022759601183	-5.37442	B_cell__FCRL5	FCRL5	B_cell
-0.962791	-0.423337	-1.08057	0.30260150603564	0.959022759601183	-5.38105	B_cell__UBE2G1	UBE2G1	B_cell
1.41474180811644	7.88360497329945	1.07819101874451	0.303617527279128	0.959022759601183	-5.3834	B_cell__DUSP1	DUSP1	B_cell
1.07468610834103	6.6217289243675	1.07721416144425	0.304035071058916	0.959022759601183	-5.38437	B_cell__SAT1	SAT1	B_cell
-1.09315	-1.57561	-1.06692	0.308460166785984	0.959022759601183	-5.39446	B_cell__SLC38A1	SLC38A1	B_cell
1.7297815691289	-5.95374	1.06320451891595	0.310071090303596	0.959022759601183	-5.39809	B_cell__CAMK1D	CAMK1D	B_cell
-0.847032	-2.31184	-1.05583	0.313282588636559	0.959022759601183	-5.40525	B_cell__DOCK8	DOCK8	B_cell
0.915585201523755	3.32234300393379	1.05370787168303	0.314213637097895	0.959022759601183	-5.40731	B_cell__CYTIP	CYTIP	B_cell
-0.981907	-5.68619	-1.04914	0.316221493375571	0.959022759601183	-5.41172	B_cell__TTC7A	TTC7A	B_cell
1.12808853921757	3.61666631671477	1.04638292096558	0.317437062975437	0.959022759601183	-5.41437	B_cell__MCL1	MCL1	B_cell
1.09940356246003	0.0777232856859406	1.04413112298548	0.318432935022318	0.959022759601183	-5.41654	B_cell__SEL1L	SEL1L	B_cell
0.939005703850426	2.66483282055441	1.03958676545832	0.320449794194703	0.959022759601183	-5.42089	B_cell__CCNL1	CCNL1	B_cell
0.857331043313218	-1.10777	1.0347951598889	0.322586662340831	0.959022759601183	-5.42547	B_cell__PCMTD1	PCMTD1	B_cell
-0.827949	-3.49427	-1.03318	0.323311388233289	0.959022759601183	-5.42701	B_cell__BRAF	BRAF	B_cell
-0.938244	-6.25367	-1.0294	0.325004884701783	0.959022759601183	-5.4306	B_cell__HIVEP2	HIVEP2	B_cell
-0.837082	-2.94152	-1.02907	0.325154118471098	0.959022759601183	-5.43092	B_cell__STX16	STX16	B_cell
0.922986673016087	0.621165869867365	1.0288568602772	0.325249565663272	0.959022759601183	-5.43112	B_cell__STK17B	STK17B	B_cell
0.850777422100341	8.58434893153103	1.02645644394693	0.326330589188358	0.959022759601183	-5.43339	B_cell__ACTB	ACTB	B_cell
1.48091016352219	-6.58607	1.02330186243271	0.32775528748155	0.959022759601183	-5.43638	B_cell__SGMS1	SGMS1	B_cell
0.862427954015156	-0.220801	1.0224879652754	0.328123611035021	0.959022759601183	-5.43715	B_cell__VMP1	VMP1	B_cell
-1.05334	-0.73862	-1.02108	0.328759511435609	0.959022759601183	-5.43847	B_cell__NRDC	NRDC	B_cell
0.909421977445666	-4.81497	1.0197709655364	0.32935538305922	0.959022759601183	-5.43971	B_cell__KANSL1	KANSL1	B_cell
0.854339663827612	-1.73064	1.01557180728816	0.331265804036866	0.959022759601183	-5.44366	B_cell__BRD4	BRD4	B_cell
0.83079610805513	4.54906027148037	1.01165135310235	0.333056778211659	0.959022759601183	-5.44733	B_cell__CIRBP	CIRBP	B_cell
0.989559121278118	-2.06882	1.00414069247799	0.336507704624974	0.959022759601183	-5.45434	B_cell__PDK1	PDK1	B_cell
-0.818523	-3.92572	-1.00346	0.336822095085055	0.959022759601183	-5.45497	B_cell__ADAM10	ADAM10	B_cell
0.956175154396006	1.36274978588067	0.999032465556949	0.33886969780858	0.959022759601183	-5.45908	B_cell__TAPBP	TAPBP	B_cell
-1.17788	-2.0684	-0.998986	0.338891347697771	0.959022759601183	-5.45912	B_cell__TLK1	TLK1	B_cell
-0.902369	-2.4802	-0.991843	0.342214464828861	0.959022759601183	-5.46572	B_cell__ATF6	ATF6	B_cell
0.833184673910428	-2.30478	0.991263373113664	0.342485222149503	0.959022759601183	-5.46625	B_cell__AFTPH	AFTPH	B_cell
-0.819782	-3.11752	-0.985773	0.345057127262321	0.959022759601183	-5.47129	B_cell__SP3	SP3	B_cell
-0.864318	-2.5652	-0.985037	0.345403167553764	0.959022759601183	-5.47197	B_cell__SPAG9	SPAG9	B_cell
1.06363147650704	8.47820353527666	0.984713989278603	0.345554870530057	0.959022759601183	-5.47226	B_cell__JUN	JUN	B_cell
1.2872253204315	5.91755343391792	0.982789475752178	0.346460660110458	0.959022759601183	-5.47402	B_cell__IGHM	IGHM	B_cell
-0.955076	-5.93367	-0.981037	0.347286815923151	0.959022759601183	-5.47562	B_cell__NCOA2	NCOA2	B_cell
0.858902792608762	0.530168848959351	0.97539938514665	0.349954856390247	0.959022759601183	-5.48075	B_cell__SIL1	SIL1	B_cell
-0.978999	-4.83511	-0.975209	0.350045134514775	0.959022759601183	-5.48093	B_cell__TRPM7	TRPM7	B_cell
-0.918661	-6.91289	-0.974365	0.350445885361696	0.959022759601183	-5.48169	B_cell__TNKS	TNKS	B_cell
0.96013582968892	2.03490168050817	0.971740788697406	0.351694111832459	0.959022759601183	-5.48407	B_cell__TXNDC15	TXNDC15	B_cell
-0.994818	-3.07148	-0.965485	0.354682696747631	0.959022759601183	-5.48972	B_cell__MBTPS1	MBTPS1	B_cell
0.918743258762712	-5.81045	0.956783423063708	0.358869423910919	0.959022759601183	-5.49752	B_cell__VPS53	VPS53	B_cell
-1.01194	-2.91736	-0.955811	0.359339449744651	0.959022759601183	-5.49839	B_cell__RB1CC1	RB1CC1	B_cell
0.868483166985478	2.45117290203707	0.954968817185726	0.359747004015537	0.959022759601183	-5.49914	B_cell__SON	SON	B_cell
0.852206866230123	-1.52131	0.95177315447655	0.361296218684708	0.959022759601183	-5.50199	B_cell__CHD2	CHD2	B_cell
-0.828427	3.50131973059431	-0.949799	0.36225547004553	0.959022759601183	-5.50375	B_cell__MTDH	MTDH	B_cell
-0.868839	0.299258070971596	-0.948099	0.363083478615454	0.959022759601183	-5.50525	B_cell__SRPRA	SRPRA	B_cell
0.820028162578032	-4.86861	0.946582420088969	0.363822754394091	0.959022759601183	-5.5066	B_cell__FBXO11	FBXO11	B_cell
-0.791135	-2.18445	-0.94631	0.363955567840964	0.959022759601183	-5.50684	B_cell__STX7	STX7	B_cell
-0.795032	1.55344160689023	-0.945299	0.364449195688263	0.959022759601183	-5.50773	B_cell__CTSH	CTSH	B_cell
0.894244645006277	2.59178803393547	0.944465907458088	0.364856546994886	0.959022759601183	-5.50847	B_cell__ARID5B	ARID5B	B_cell
0.772295431288002	-2.97123	0.941685308799215	0.366217878892851	0.959022759601183	-5.51093	B_cell__OGT	OGT	B_cell
0.86565220887796	-4.39928	0.940744609209989	0.366679244328365	0.959022759601183	-5.51175	B_cell__PRRC2B	PRRC2B	B_cell
0.801282180096895	-1.50187	0.940487137075187	0.366805593227857	0.959022759601183	-5.51198	B_cell__ADAR	ADAR	B_cell
-0.822769	-1.51876	-0.92449	0.37471631716207	0.959022759601183	-5.52597	B_cell__NAP1L4	NAP1L4	B_cell
0.989345648316032	-1.34086	0.918488891876796	0.377714853963566	0.959022759601183	-5.53116	B_cell__FNBP4	FNBP4	B_cell
0.807600747876613	-0.75762	0.91841317506675	0.377752792627433	0.959022759601183	-5.53123	B_cell__ARID4B	ARID4B	B_cell
0.864168425537724	1.4386441068304	0.917457736646471	0.378231754228996	0.959022759601183	-5.53205	B_cell__MS4A1	MS4A1	B_cell
1.39758748562756	-6.37248	0.915956592841237	0.378985137670625	0.959022759601183	-5.53335	B_cell__PDE4D	PDE4D	B_cell
0.791383588691411	1.26171049228372	0.915588080348889	0.379170244708158	0.959022759601183	-5.53366	B_cell__DDX24	DDX24	B_cell
-0.843881	-2.55294	-0.914655	0.379639191571667	0.959022759601183	-5.53447	B_cell__KDM5A	KDM5A	B_cell
0.877610865585164	-2.56602	0.909962168369805	0.382004049607541	0.959022759601183	-5.5385	B_cell__PARP14	PARP14	B_cell
0.899108765256718	-1.26416	0.894168835139373	0.390038073926651	0.959022759601183	-5.55192	B_cell__ANKRD11	ANKRD11	B_cell
0.889736010283442	-8.38379	0.893486290460856	0.390387902267754	0.959022759601183	-5.5525	B_cell__TRRAP	TRRAP	B_cell
-0.726701	0.201927759400404	-0.887099	0.393672093404028	0.959022759601183	-5.55787	B_cell__ATRX	ATRX	B_cell
-0.951053	-2.33969	-0.884138	0.395201073509703	0.959022759601183	-5.56034	B_cell__ITGA4	ITGA4	B_cell
-0.713093	-0.537682	-0.882201	0.396203458683607	0.959022759601183	-5.56196	B_cell__EWSR1	EWSR1	B_cell
-0.753476	-3.13729	-0.881117	0.396765111308443	0.959022759601183	-5.56286	B_cell__NCKAP1L	NCKAP1L	B_cell
-0.863705	-2.13363	-0.879786	0.397455452366275	0.959022759601183	-5.56397	B_cell__GLS	GLS	B_cell
0.766967830807096	0.582577987308871	0.879048702730836	0.397838501300659	0.959022759601183	-5.56459	B_cell__CAPZB	CAPZB	B_cell
0.876155139867023	-3.99957	0.878460709818047	0.398143994459203	0.959022759601183	-5.56507	B_cell__SP110	SP110	B_cell
-0.807979	-3.82832	-0.874976	0.399957754843776	0.959022759601183	-5.56796	B_cell__RAB3GAP1	RAB3GAP1	B_cell
1.39718807049967	-5.96533	0.866969621280624	0.404146493011342	0.959022759601183	-5.57457	B_cell__DYRK1A	DYRK1A	B_cell
-0.826524	-2.62464	-0.862626	0.406431156201304	0.959022759601183	-5.57813	B_cell__LYN	LYN	B_cell
0.870973400754939	-6.28106	0.855917907927236	0.409977358530213	0.959022759601183	-5.5836	B_cell__NLRP1	NLRP1	B_cell
1.01387635861917	-4.31035	0.855786620736354	0.410046966187688	0.959022759601183	-5.58371	B_cell__RHBDD1	RHBDD1	B_cell
0.749316472178375	1.5853880100401	0.848729632709117	0.413800300569815	0.959022759601183	-5.58942	B_cell__SRRM2	SRRM2	B_cell
0.758027662186147	1.65581683815962	0.84740648964285	0.414506598325274	0.959022759601183	-5.59048	B_cell__STK4	STK4	B_cell
-0.682727	-3.49188	-0.845268	0.415649736064932	0.959022759601183	-5.5922	B_cell__SFSWAP	SFSWAP	B_cell
-0.741805	-0.898397	-0.844816	0.41589180312055	0.959022759601183	-5.59257	B_cell__MDM4	MDM4	B_cell
0.74073024455124	2.53868179388378	0.83988450057061	0.418537265921465	0.959022759601183	-5.59652	B_cell__YWHAZ	YWHAZ	B_cell
1.00650508001451	-5.16411	0.839808941413335	0.418577887260278	0.959022759601183	-5.59658	B_cell__QKI	QKI	B_cell
-0.902277	-3.42334	-0.838853	0.419091952761596	0.959022759601183	-5.59734	B_cell__GLCCI1	GLCCI1	B_cell
-0.781562	-6.15966	-0.836274	0.420481375945052	0.959022759601183	-5.5994	B_cell__KLF12	KLF12	B_cell
-0.734896	-2.19118	-0.834519	0.42142852773954	0.959022759601183	-5.6008	B_cell__ZNF292	ZNF292	B_cell
0.834728906604297	-0.853428	0.834183473728766	0.421609610106879	0.959022759601183	-5.60106	B_cell__ADAM28	ADAM28	B_cell
0.713410794918608	-3.32516	0.833303363050778	0.422085250040863	0.959022759601183	-5.60176	B_cell__SYK	SYK	B_cell
0.682336518000516	4.3204478839112	0.82944545754138	0.424174407777772	0.959022759601183	-5.60482	B_cell__SEC62	SEC62	B_cell
0.767064019910346	-1.09261	0.828858212141212	0.424493019437901	0.959022759601183	-5.60528	B_cell__MBNL1	MBNL1	B_cell
0.81496967219503	-4.60807	0.828843048090423	0.424501248845415	0.959022759601183	-5.60529	B_cell__MAP4K4	MAP4K4	B_cell
1.21201639424398	-3.86136	0.826309640552367	0.425877598662859	0.959022759601183	-5.60729	B_cell__BCL11A	BCL11A	B_cell
0.770584077201451	-4.41527	0.823645277999019	0.427328288564094	0.959022759601183	-5.60939	B_cell__DOCK10	DOCK10	B_cell
-0.730947	-0.891883	-0.818372	0.430209354258072	0.959022759601183	-5.61352	B_cell__TPR	TPR	B_cell
-0.793015	3.15299287946734	-0.817253	0.430822184955234	0.959022759601183	-5.61439	B_cell__TRAM1	TRAM1	B_cell
-0.752848	-1.951	-0.817001	0.430960485443917	0.959022759601183	-5.61459	B_cell__PPP3CC	PPP3CC	B_cell
-0.938418	-9.48068	-0.811472	0.433997946460257	0.959022759601183	-5.61889	B_cell__RPTOR	RPTOR	B_cell
0.66089730067394	0.589739811017832	0.809642908701862	0.435006044691614	0.959022759601183	-5.62031	B_cell__RBM25	RBM25	B_cell
0.694778997806431	-3.33634	0.806665110372397	0.436650454645554	0.959022759601183	-5.62261	B_cell__ANKRD10	ANKRD10	B_cell
-0.899202	-3.7516	-0.804869	0.437644504669997	0.959022759601183	-5.62399	B_cell__SCAPER	SCAPER	B_cell
0.65475739265888	3.59562526432369	0.80243039581093	0.438995974302792	0.959022759601183	-5.62587	B_cell__TMSB4X	TMSB4X	B_cell
-0.817092	-1.12544	-0.801534	0.439493729629279	0.959022759601183	-5.62655	B_cell__STT3B	STT3B	B_cell
-0.882938	0.472411241723988	-0.791583	0.445041608390665	0.959022759601183	-5.63415	B_cell__CCPG1	CCPG1	B_cell
0.639784008616578	-0.421807	0.790622293623069	0.445579641202181	0.959022759601183	-5.63487	B_cell__SLTM	SLTM	B_cell
0.695618952693842	0.702583600675851	0.790526456954315	0.445633336409309	0.959022759601183	-5.63495	B_cell__TAF1D	TAF1D	B_cell
0.707024830202776	-0.86909	0.785345492270899	0.448542361832489	0.959022759601183	-5.63886	B_cell__RBM6	RBM6	B_cell
0.712836218222142	2.92736849166523	0.779906309488569	0.451609548578394	0.959022759601183	-5.64295	B_cell__TPM4	TPM4	B_cell
0.753879985797933	1.10054732592047	0.779315895847413	0.451943297270139	0.959022759601183	-5.64339	B_cell__AKAP9	AKAP9	B_cell
1.05628762107994	-2.94297	0.777711725087614	0.452850903338854	0.959022759601183	-5.64459	B_cell__EIF2AK3	EIF2AK3	B_cell
0.652459880166293	1.85774259839274	0.777241361664673	0.453117247104732	0.959022759601183	-5.64494	B_cell__PNISR	PNISR	B_cell
0.69865374073106	-1.62742	0.773776091985519	0.455082560845023	0.959022759601183	-5.64752	B_cell__RSF1	RSF1	B_cell
1.00756844223339	-8.31309	0.773615635689468	0.455173695216353	0.959022759601183	-5.64764	B_cell__CIITA	CIITA	B_cell
-0.652679	-2.08338	-0.771486	0.45638422949858	0.959022759601183	-5.64922	B_cell__ELOVL5	ELOVL5	B_cell
0.657829744927501	0.323257656880451	0.771026962513379	0.456645600370616	0.959022759601183	-5.64956	B_cell__CD52	CD52	B_cell
-0.766287	-5.8204	-0.76895	0.45782894171827	0.959022759601183	-5.6511	B_cell__NBAS	NBAS	B_cell
0.737449796429509	-4.4762	0.765592125372033	0.459745712365665	0.959022759601183	-5.65357	B_cell__ENTPD4	ENTPD4	B_cell
0.745521886114084	-1.84582	0.76516800863035	0.459988198066472	0.959022759601183	-5.65389	B_cell__RBM33	RBM33	B_cell
0.712272144428194	0.282783927997831	0.763705446222755	0.4608250324515	0.959022759601183	-5.65496	B_cell__CCDC50	CCDC50	B_cell
0.700385164417848	-0.712428	0.760679155898471	0.462559659217301	0.959022759601183	-5.65718	B_cell__GAS6	GAS6	B_cell
0.85048778734448	-2.7839	0.753793993507162	0.466521556409715	0.959022759601183	-5.6622	B_cell__BAZ2B	BAZ2B	B_cell
-0.619124	-0.0974173	-0.752875	0.467052232415535	0.959022759601183	-5.66287	B_cell__CSNK1A1	CSNK1A1	B_cell
0.69010371168193	9.2900826216615	0.752707375498139	0.467148778363873	0.959022759601183	-5.66299	B_cell__MZB1	MZB1	B_cell
-0.699985	-1.26259	-0.751613	0.467780928699454	0.959022759601183	-5.66378	B_cell__CLPTM1L	CLPTM1L	B_cell
0.858221748402685	-6.28871	0.751560519444226	0.467811348349394	0.959022759601183	-5.66382	B_cell__SIPA1L1	SIPA1L1	B_cell
-0.633502	-2.36274	-0.750274	0.46855519471106	0.959022759601183	-5.66475	B_cell__CYTH1	CYTH1	B_cell
0.61320161964729	1.19847302284891	0.748747099444031	0.469439246600903	0.959022759601183	-5.66586	B_cell__GNG7	GNG7	B_cell
0.627569471898895	-3.05806	0.747029134398611	0.470435045316225	0.959022759601183	-5.6671	B_cell__TNRC6A	TNRC6A	B_cell
0.623953912185235	3.27994506524366	0.744281130187419	0.472030652716096	0.959022759601183	-5.66907	B_cell__MYL6	MYL6	B_cell
-0.691507	-4.33251	-0.741969	0.473375788561065	0.959022759601183	-5.67073	B_cell__JARID2	JARID2	B_cell
-0.598011	2.36787239674847	-0.741193	0.473827949255046	0.959022759601183	-5.67129	B_cell__HSPA5	HSPA5	B_cell
-0.608202	-2.99057	-0.740508	0.474226859761939	0.959022759601183	-5.67178	B_cell__NSD1	NSD1	B_cell
0.919916589438199	-3.55362	0.739434540625912	0.474853048873503	0.959022759601183	-5.67254	B_cell__ETS1	ETS1	B_cell
0.703855071371045	-3.8254	0.738272711116046	0.475531201375514	0.959022759601183	-5.67337	B_cell__PUM1	PUM1	B_cell
0.622413022028931	1.01139599761234	0.738076727291337	0.475645655481132	0.959022759601183	-5.67351	B_cell__PTPN1	PTPN1	B_cell
0.607025615395166	-4.22436	0.737685535057907	0.475874162276066	0.959022759601183	-5.67379	B_cell__NPEPPS	NPEPPS	B_cell
-0.617263	-2.74506	-0.73675	0.476421019019741	0.959022759601183	-5.67446	B_cell__RBM5	RBM5	B_cell
-1.02638	-2.51634	-0.735128	0.477369551409647	0.959022759601183	-5.67561	B_cell__HIST1H1E	HIST1H1E	B_cell
-0.71585	-4.2715	-0.734552	0.477707104022084	0.959022759601183	-5.67602	B_cell__ATP11B	ATP11B	B_cell
0.675683370412997	-3.08422	0.732817356870282	0.47872353441782	0.959022759601183	-5.67725	B_cell__NUMB	NUMB	B_cell
0.681663708756145	-5.95269	0.730711202430179	0.479959560465197	0.959022759601183	-5.67874	B_cell__SREBF2	SREBF2	B_cell
-0.663765	5.57186176466293	-0.73025	0.480230468559665	0.959022759601183	-5.67906	B_cell__ISG20	ISG20	B_cell
-0.661535	0.07852560319387	-0.726912	0.482194447390998	0.959022759601183	-5.68141	B_cell__RSRP1	RSRP1	B_cell
0.616872861470781	1.05980960653093	0.726421426339781	0.482483194507567	0.959022759601183	-5.68176	B_cell__PRRC2C	PRRC2C	B_cell
0.594582765485974	1.91861021974247	0.726302818019007	0.482553087133603	0.959022759601183	-5.68184	B_cell__FTH1	FTH1	B_cell
0.838064196655257	4.30236942112689	0.724162108939703	0.483815624574945	0.959022759601183	-5.68334	B_cell__DDIT4	DDIT4	B_cell
-0.652899	-3.3748	-0.722497	0.484798964175018	0.959022759601183	-5.68451	B_cell__PSPC1	PSPC1	B_cell
-0.597817	-4.94726	-0.722308	0.484910992558314	0.959022759601183	-5.68464	B_cell__DMTF1	DMTF1	B_cell
-0.748584	-2.82988	-0.720667	0.485881258370805	0.959022759601183	-5.68578	B_cell__OSBPL9	OSBPL9	B_cell
0.667691258636903	-4.03506	0.718906902605914	0.486923654659303	0.959022759601183	-5.68701	B_cell__CUX1	CUX1	B_cell
0.705355060588125	0.138224263966843	0.716723836642993	0.488218365213636	0.959022759601183	-5.68853	B_cell__SEL1L3	SEL1L3	B_cell
0.608978320318957	1.77657402498513	0.71592799229549	0.488690881817079	0.959022759601183	-5.68908	B_cell__EIF4A2	EIF4A2	B_cell
-0.731421	-6.47045	-0.714079	0.489789677017469	0.959022759601183	-5.69036	B_cell__CDKAL1	CDKAL1	B_cell
0.750568089022791	-3.79737	0.713545936198417	0.490106855639513	0.959022759601183	-5.69073	B_cell__ZBTB20	ZBTB20	B_cell
-0.610629	-2.43661	-0.712236	0.490886754103142	0.959022759601183	-5.69163	B_cell__SMARCA2	SMARCA2	B_cell
-0.772392	-4.30543	-0.711406	0.491380801786287	0.959022759601183	-5.69221	B_cell__HERC2	HERC2	B_cell
-0.608202	-2.99057	-0.710345	0.492013580942447	0.959022759601183	-5.69294	B_cell__ITPR2	ITPR2	B_cell
-0.634991	-2.39523	-0.709873	0.492295129871534	0.959022759601183	-5.69326	B_cell__SLC44A1	SLC44A1	B_cell
0.613044158698888	-4.55085	0.708406597417278	0.493170395291061	0.959022759601183	-5.69427	B_cell__ITCH	ITCH	B_cell
0.566034482278576	4.10365114072153	0.695928870988736	0.500656732517559	0.959022759601183	-5.70277	B_cell__PNRC1	PNRC1	B_cell
-0.658022	-7.19846	-0.694259	0.501663741380292	0.959022759601183	-5.7039	B_cell__SPIDR	SPIDR	B_cell
0.70555546415728	-3.65997	0.693668556659498	0.502020176189499	0.959022759601183	-5.70429	B_cell__GMDS	GMDS	B_cell
-0.819332	-4.92727	-0.69293	0.502466418346688	0.959022759601183	-5.70479	B_cell__PAN3	PAN3	B_cell
-0.635704	1.24483186959592	-0.692515	0.502717172628065	0.959022759601183	-5.70507	B_cell__DNAJC1	DNAJC1	B_cell
0.75782916459305	-1.34893	0.690843800785254	0.503727237338454	0.959022759601183	-5.70619	B_cell__RALGPS2	RALGPS2	B_cell
-0.583115	-4.93844	-0.688572	0.505102637672846	0.959022759601183	-5.70772	B_cell__EXOC4	EXOC4	B_cell
0.592460721014334	-3.96952	0.688174102912645	0.505343795978167	0.959022759601183	-5.70798	B_cell__SSH2	SSH2	B_cell
0.977693093834405	-4.00196	0.687965750674147	0.505470088436234	0.959022759601183	-5.70812	B_cell__TMEM131	TMEM131	B_cell
0.551060761089294	2.41099655576466	0.686275810451317	0.506495142560469	0.959022759601183	-5.70925	B_cell__HNRNPC	HNRNPC	B_cell
-0.721574	-5.12261	-0.685996	0.506665071952407	0.959022759601183	-5.70944	B_cell__ARFGEF1	ARFGEF1	B_cell
-0.61956	-3.14348	-0.684371	0.507651722763284	0.959022759601183	-5.71052	B_cell__ARHGEF1	ARHGEF1	B_cell
0.634364145863706	-2.30458	0.683107912111346	0.508420019609412	0.959022759601183	-5.71136	B_cell__BPTF	BPTF	B_cell
-0.559783	-0.815905	-0.682928	0.508529383602496	0.959022759601183	-5.71148	B_cell__ZRANB2	ZRANB2	B_cell
0.584576672271241	0.446836285681031	0.68191651758511	0.509145063120107	0.959022759601183	-5.71215	B_cell__TCF4	TCF4	B_cell
-0.599979	1.8688281799993	-0.677628	0.511760225827432	0.959022759601183	-5.71499	B_cell__TPD52	TPD52	B_cell
-0.645361	1.56334464816154	-0.677335	0.511938763277664	0.959022759601183	-5.71518	B_cell__CD38	CD38	B_cell
0.906041957649835	-4.14604	0.673642863600812	0.514197112356409	0.959022759601183	-5.71761	B_cell__ANKHD1	ANKHD1	B_cell
0.716044773915095	-1.39756	0.672733214744665	0.51475436788072	0.959022759601183	-5.7182	B_cell__TMEM156	TMEM156	B_cell
0.590750682277219	-2.4173	0.668283345635209	0.517485523128483	0.959022759601183	-5.72111	B_cell__USP34	USP34	B_cell
0.644212182139702	16.0012987584468	0.665116463019657	0.519434423024464	0.959022759601183	-5.72317	B_cell__JCHAIN	JCHAIN	B_cell
-0.712636	5.08737418869048	-0.664872	0.519584771182401	0.959022759601183	-5.72332	B_cell__ZFP36L2	ZFP36L2	B_cell
0.614201463637654	-7.10609	0.664488664902827	0.519821281813532	0.959022759601183	-5.72357	B_cell__ITPR1	ITPR1	B_cell
-0.605162	-5.72372	-0.662454	0.521076014977122	0.959022759601183	-5.72489	B_cell__SETBP1	SETBP1	B_cell
0.658953960178288	0.069333633402626	0.661299979875581	0.521788808269916	0.959022759601183	-5.72563	B_cell__JAK1	JAK1	B_cell
0.531961549113532	-1.30299	0.660246052382086	0.522440075065748	0.959022759601183	-5.72631	B_cell__SRSF4	SRSF4	B_cell
0.572860947958624	-3.2634	0.65808401605978	0.52377757691307	0.959022759601183	-5.7277	B_cell__AKNA	AKNA	B_cell
-0.882328	-4.10614	-0.657991	0.52383530287731	0.959022759601183	-5.72776	B_cell__ANKRD36B	ANKRD36B	B_cell
-0.570654	-3.21555	-0.65796	0.523854114841631	0.959022759601183	-5.72778	B_cell__MED13L	MED13L	B_cell
0.541795146951357	-0.283206	0.65738152214957	0.524212591194817	0.959022759601183	-5.72815	B_cell__STAT3	STAT3	B_cell
0.648633885037677	-4.04649	0.654920267656427	0.525738367242407	0.959022759601183	-5.72973	B_cell__PKN2	PKN2	B_cell
0.626982875268586	-2.30901	0.654805139179924	0.525809800719326	0.959022759601183	-5.7298	B_cell__RSRC1	RSRC1	B_cell
0.589895989032979	3.34023265383433	0.653856211630803	0.526398794568657	0.959022759601183	-5.73041	B_cell__EIF5	EIF5	B_cell
-0.566748	-1.20662	-0.651143	0.528084956225482	0.959022759601183	-5.73214	B_cell__FOXP1	FOXP1	B_cell
0.770908846247046	1.18533032095038	0.64803051090705	0.530023168999977	0.959022759601183	-5.73411	B_cell__FBXW7	FBXW7	B_cell
0.549267365801385	1.7712945408469	0.647749629883535	0.530198279254537	0.959022759601183	-5.73429	B_cell__FTL	FTL	B_cell
0.549736723252149	-3.51215	0.647100054466458	0.530603373572127	0.959022759601183	-5.7347	B_cell__CCNL2	CCNL2	B_cell
-0.638565	-4.81881	-0.644615	0.53215460892423	0.959022759601183	-5.73627	B_cell__MSL2	MSL2	B_cell
0.511904101665232	-3.31542	0.639954211677127	0.535071516342104	0.959022759601183	-5.73919	B_cell__ADD1	ADD1	B_cell
-0.57483	-0.182695	-0.637215	0.536790199137009	0.959022759601183	-5.7409	B_cell__HNRNPD	HNRNPD	B_cell
-0.627556	-1.47463	-0.636717	0.537103033693806	0.959022759601183	-5.74121	B_cell__EDEM1	EDEM1	B_cell
-0.627528	-2.34584	-0.634315	0.538612895956005	0.959022759601183	-5.74271	B_cell__BLK	BLK	B_cell
0.73022592571161	-2.44384	0.630897526604916	0.540765378618052	0.959022759601183	-5.74482	B_cell__ITFG1	ITFG1	B_cell
-0.543845	-3.59651	-0.629155	0.541864822475591	0.959022759601183	-5.7459	B_cell__BRWD1	BRWD1	B_cell
0.541521301103287	0.575557432041187	0.628971495497159	0.541980692861682	0.959022759601183	-5.74601	B_cell__RAB2A	RAB2A	B_cell
0.57272101536061	0.246605670503291	0.627851979286719	0.542687813425631	0.959022759601183	-5.7467	B_cell__MPHOSPH8	MPHOSPH8	B_cell
0.591826654739418	-0.46155	0.627524367327216	0.542894842100872	0.959022759601183	-5.7469	B_cell__RAB30	RAB30	B_cell
0.698602445998682	-1.62745	0.627091195652055	0.54316864616432	0.959022759601183	-5.74716	B_cell__NCOA3	NCOA3	B_cell
-0.544051	-1.92713	-0.624559	0.544770920167718	0.959022759601183	-5.74872	B_cell__MARK3	MARK3	B_cell
0.598580157047898	-1.95104	0.623998166438502	0.545125996477665	0.959022759601183	-5.74906	B_cell__MSI2	MSI2	B_cell
-0.598656	-3.35185	-0.62236	0.546164108706747	0.959022759601183	-5.75006	B_cell__NIN	NIN	B_cell
0.608359052062964	2.57602642139013	0.61754840289695	0.549220369964654	0.961993956567532	-5.75298	B_cell__ASXL1	ASXL1	B_cell
0.566265903791309	-6.46389	0.615612470605774	0.55045268230045	0.961993956567532	-5.75415	B_cell__MICAL3	MICAL3	B_cell
0.52163686827501	-1.62579	0.611023687937771	0.553379839201158	0.962697947350271	-5.75691	B_cell__LMBRD1	LMBRD1	B_cell
-0.545982	-2.70832	-0.610826	0.553506220942344	0.962697947350271	-5.75703	B_cell__TBL1XR1	TBL1XR1	B_cell
0.490827078046321	1.33070052882786	0.608191363397436	0.55519088865607	0.962697947350271	-5.7586	B_cell__KMT2E	KMT2E	B_cell
-0.60671	3.88368230324776	-0.606846	0.556052255689496	0.962697947350271	-5.75941	B_cell__TRIP12	TRIP12	B_cell
0.508265061156409	1.44573016375358	0.602673102539941	0.558728832766598	0.965077074778669	-5.76188	B_cell__FUS	FUS	B_cell
-0.519809	-1.12853	-0.596128	0.562941428640972	0.968992733378813	-5.76574	B_cell__CPNE1	CPNE1	B_cell
0.568949538954379	-1.27403	0.595089584970171	0.563611158011158	0.968992733378813	-5.76634	B_cell__CLIC4	CLIC4	B_cell
0.61050973933531	-5.66529	0.592714409428414	0.565145117424524	0.969380861137899	-5.76773	B_cell__ZMIZ2	ZMIZ2	B_cell
-0.480729	1.54569168315101	-0.588159	0.568093344893339	0.970102396973054	-5.77037	B_cell__N4BP2L2	N4BP2L2	B_cell
-0.625464	-3.28951	-0.586419	0.569221864123347	0.970102396973054	-5.77138	B_cell__MACF1	MACF1	B_cell
0.472327705408683	5.43463273508592	0.583863615503673	0.570881282543446	0.970102396973054	-5.77285	B_cell__B2M	B2M	B_cell
-0.561011	-3.82624	-0.579235	0.573893889101706	0.970102396973054	-5.7755	B_cell__BIRC6	BIRC6	B_cell
-0.482784	1.51709302151293	-0.578121	0.574619872621805	0.970102396973054	-5.77613	B_cell__HNRNPU	HNRNPU	B_cell
-0.583214	-2.61511	-0.571891	0.578690668498731	0.970102396973054	-5.77966	B_cell__FAM214A	FAM214A	B_cell
0.513269499402164	-0.325627	0.570226280090193	0.579780991695339	0.970102396973054	-5.7806	B_cell__BANK1	BANK1	B_cell
0.545512802553554	4.98240224990757	0.569697411139097	0.580127619432768	0.970102396973054	-5.78089	B_cell__PACS1	PACS1	B_cell
-0.511189	2.06910881893694	-0.568994	0.580589101274905	0.970102396973054	-5.78129	B_cell__ELF1	ELF1	B_cell
-0.484827	0.756458454694358	-0.564674	0.583425397663727	0.970102396973054	-5.7837	B_cell__HMGN3	HMGN3	B_cell
-0.453644	-4.86076	-0.560909	0.585903967350209	0.970102396973054	-5.78579	B_cell__FOXO1	FOXO1	B_cell
-0.51889	-0.6198	-0.556109	0.589071270542934	0.970102396973054	-5.78844	B_cell__USP48	USP48	B_cell
-0.476283	-2.26841	-0.555083	0.589749593654173	0.970102396973054	-5.789	B_cell__GLG1	GLG1	B_cell
0.48414440289444	-2.23031	0.554512407246687	0.590126993094944	0.970102396973054	-5.78931	B_cell__KLHL6	KLHL6	B_cell
-0.536636	1.43838279736762	-0.553276	0.590945029451982	0.970102396973054	-5.78999	B_cell__ACADVL	ACADVL	B_cell
-0.521918	-3.96718	-0.548479	0.594124759303535	0.970102396973054	-5.7926	B_cell__ANKRD36	ANKRD36	B_cell
-0.596208	-4.29494	-0.544152	0.597001130837086	0.970102396973054	-5.79493	B_cell__PLEKHA2	PLEKHA2	B_cell
0.490397710782902	1.13989444114829	0.543170602824001	0.597654185661476	0.970102396973054	-5.79546	B_cell__BRD2	BRD2	B_cell
-0.459767	-0.733358	-0.542979	0.597781818230412	0.970102396973054	-5.79556	B_cell__U2SURP	U2SURP	B_cell
-0.487149	1.95107854224737	-0.539242	0.600273322569375	0.970102396973054	-5.79756	B_cell__GPBP1	GPBP1	B_cell
-0.469566	4.66139726611172	-0.53477	0.60326109414631	0.970102396973054	-5.79993	B_cell__TMSB10	TMSB10	B_cell
0.620046107783751	-4.9886	0.532686291342606	0.604656219248469	0.970102396973054	-5.80103	B_cell__LRRK1	LRRK1	B_cell
0.536402520382645	1.39644698905607	0.529279570557872	0.606940420694977	0.970102396973054	-5.80282	B_cell__SMAP2	SMAP2	B_cell
-0.424025	7.09480906474613	-0.527044	0.608441774517412	0.970102396973054	-5.80399	B_cell__BTG1	BTG1	B_cell
-0.469354	2.45923416049656	-0.521305	0.61230431712604	0.970102396973054	-5.80697	B_cell__HM13	HM13	B_cell
-0.431075	5.62892300868273	-0.513999	0.617239493492112	0.970102396973054	-5.81071	B_cell__SPCS2	SPCS2	B_cell
0.505273556370125	-0.916369	0.51320023168249	0.617780421074294	0.970102396973054	-5.81112	B_cell__EIF2AK4	EIF2AK4	B_cell
-0.453138	-2.31849	-0.512849	0.618018196346168	0.970102396973054	-5.8113	B_cell__COPA	COPA	B_cell
0.462232679141351	-4.64133	0.512799123336728	0.618052061818895	0.970102396973054	-5.81132	B_cell__EP300	EP300	B_cell
-0.65167	-1.11208	-0.511731	0.618775624605585	0.970102396973054	-5.81187	B_cell__SLC38A10	SLC38A10	B_cell
0.444642384707779	0.489438591785601	0.510601543285716	0.619541373422143	0.970102396973054	-5.81244	B_cell__DDX17	DDX17	B_cell
0.489965782219362	-1.99915	0.509630287123787	0.620200166348155	0.970102396973054	-5.81293	B_cell__IKZF3	IKZF3	B_cell
0.595930094597155	-3.02424	0.509592236365073	0.620225982852313	0.970102396973054	-5.81295	B_cell__CEP350	CEP350	B_cell
-0.444158	1.3502935389811	-0.505611	0.622930214268578	0.970102396973054	-5.81495	B_cell__ARGLU1	ARGLU1	B_cell
0.430105786095986	0.576956831836233	0.504805384406747	0.623477985832647	0.970102396973054	-5.81536	B_cell__LY9	LY9	B_cell
0.565651120067678	-2.12873	0.502826956768462	0.624824504039177	0.970102396973054	-5.81634	B_cell__ATF7IP	ATF7IP	B_cell
-0.646621	-5.04307	-0.502403	0.625112896333668	0.970102396973054	-5.81656	B_cell__SYNE1	SYNE1	B_cell
-0.41993	-2.66324	-0.502355	0.62514565533696	0.970102396973054	-5.81658	B_cell__NIPBL	NIPBL	B_cell
-0.67568	0.863725973639379	-0.500237	0.62658964228251	0.970102396973054	-5.81763	B_cell__TXNDC11	TXNDC11	B_cell
0.711597462127838	-7.04765	0.49920199958219	0.627295352060036	0.970102396973054	-5.81815	B_cell__LARP4B	LARP4B	B_cell
-0.429251	-3.1937	-0.497323	0.628578183461457	0.970102396973054	-5.81907	B_cell__BOD1L1	BOD1L1	B_cell
0.400829663061762	0.62306270492993	0.494667607513579	0.630392801125313	0.970102396973054	-5.82038	B_cell__CD55	CD55	B_cell
-0.40124	-3.15859	-0.492623	0.631792167825946	0.970102396973054	-5.82138	B_cell__TRAF3	TRAF3	B_cell
-0.532941	-2.39	-0.491264	0.632722966013734	0.970102396973054	-5.82205	B_cell__SYVN1	SYVN1	B_cell
-0.467584	-2.66128	-0.491229	0.632746935451458	0.970102396973054	-5.82206	B_cell__FUT8	FUT8	B_cell
-0.707864	-5.52177	-0.490685	0.633119397339514	0.970102396973054	-5.82233	B_cell__LCOR	LCOR	B_cell
-0.498852	-3.54595	-0.487606	0.635231067971669	0.970102396973054	-5.82383	B_cell__GIGYF2	GIGYF2	B_cell
0.562868216351709	-4.91105	0.487099261919235	0.635579240749945	0.970102396973054	-5.82407	B_cell__OSBPL10	OSBPL10	B_cell
-0.386276	-3.14961	-0.481274	0.639584941121266	0.970102396973054	-5.82687	B_cell__ASCC3	ASCC3	B_cell
-0.448746	-2.20802	-0.478669	0.64138065983958	0.970102396973054	-5.82812	B_cell__USP3	USP3	B_cell
-0.430306	-5.35523	-0.476583	0.642819842871647	0.970102396973054	-5.82911	B_cell__DOCK11	DOCK11	B_cell
0.464752014892967	-4.59877	0.473541331485251	0.644921169411764	0.970102396973054	-5.83054	B_cell__MBD2	MBD2	B_cell
-0.459661	-4.71147	-0.473528	0.644930348980758	0.970102396973054	-5.83055	B_cell__CAPN7	CAPN7	B_cell
0.537522353090788	0.659836663059192	0.470456993650294	0.647055416328334	0.970102396973054	-5.83199	B_cell__PTPRC	PTPRC	B_cell
-0.528193	-2.28624	-0.464958	0.650868896067129	0.970102396973054	-5.83455	B_cell__BACH1	BACH1	B_cell
0.386589004499752	-4.68672	0.463541325457796	0.651852810578995	0.970102396973054	-5.83521	B_cell__MYO9B	MYO9B	B_cell
0.380013986483354	3.10228695137442	0.462419476057228	0.652632593541753	0.970102396973054	-5.83572	B_cell__RBM39	RBM39	B_cell
-0.403015	-4.0838	-0.462127	0.65283628909989	0.970102396973054	-5.83586	B_cell__POGZ	POGZ	B_cell
-0.371498	-2.46614	-0.461712	0.653124535289802	0.970102396973054	-5.83605	B_cell__ETNK1	ETNK1	B_cell
0.471054607846461	1.91629737088895	0.46085127158771	0.653723356806089	0.970102396973054	-5.83644	B_cell__PLPP5	PLPP5	B_cell
0.455159998976582	-3.41317	0.45947986799266	0.654677926433216	0.970102396973054	-5.83707	B_cell__ELMO1	ELMO1	B_cell
0.483973917926783	-3.81519	0.454350752615538	0.658253753418812	0.970102396973054	-5.83941	B_cell__ZNF638	ZNF638	B_cell
0.395432682090814	-3.19735	0.45323978983534	0.659029453390215	0.970102396973054	-5.83991	B_cell__FOXN3	FOXN3	B_cell
0.431958987528525	-0.562989	0.44985340550014	0.661396480594066	0.970102396973054	-5.84143	B_cell__TRA2A	TRA2A	B_cell
0.407975720736593	-2.8478	0.448619646559419	0.662259818672718	0.970102396973054	-5.84198	B_cell__MEF2A	MEF2A	B_cell
-0.467318	-1.04309	-0.447601	0.662972699648925	0.970102396973054	-5.84244	B_cell__CYLD	CYLD	B_cell
-0.390821	-4.82307	-0.447194	0.663257765929426	0.970102396973054	-5.84262	B_cell__FRYL	FRYL	B_cell
0.422232348059507	-4.62428	0.44327574490425	0.666005171921573	0.970102396973054	-5.84436	B_cell__PSME4	PSME4	B_cell
0.357546575609942	-2.86771	0.441459659991864	0.667280171485619	0.970102396973054	-5.84516	B_cell__RABGAP1L	RABGAP1L	B_cell
-0.407419	-4.16206	-0.440331	0.668073116667634	0.970102396973054	-5.84566	B_cell__MAP3K1	MAP3K1	B_cell
0.365186399044501	0.154583171715848	0.433247925783273	0.673058914896548	0.970102396973054	-5.84874	B_cell__TPST2	TPST2	B_cell
0.369016325785454	-4.36716	0.432007106227662	0.673934028704433	0.970102396973054	-5.84928	B_cell__NUP210	NUP210	B_cell
-0.355711	-2.34715	-0.431095	0.67457735242414	0.970102396973054	-5.84967	B_cell__INPP5D	INPP5D	B_cell
0.376817354479984	-3.26354	0.426475918928172	0.677841113603655	0.970102396973054	-5.85165	B_cell__C11ORF80	C11ORF80	B_cell
0.38240391681743	-4.42565	0.424029223576352	0.679572555982636	0.970102396973054	-5.85269	B_cell__STAT2	STAT2	B_cell
0.343071201626571	1.71623519559069	0.423013108775003	0.680292192341495	0.970102396973054	-5.85312	B_cell__TCF25	TCF25	B_cell
0.379738989738899	5.14651734389038	0.420438970529563	0.682116740642756	0.970102396973054	-5.8542	B_cell__BICD1	BICD1	B_cell
0.377916514213718	2.16542302814437	0.419999845536802	0.682428204112918	0.970102396973054	-5.85439	B_cell__MEF2C	MEF2C	B_cell
0.43016989882863	2.45528525476246	0.418584642602918	0.683432401094939	0.970102396973054	-5.85498	B_cell__ANXA2	ANXA2	B_cell
0.353886434034138	-1.22663	0.413772828797394	0.686851522498733	0.970102396973054	-5.85698	B_cell__TAOK3	TAOK3	B_cell
0.34041710146717	0.204374010487948	0.412555718660174	0.687717523333646	0.970102396973054	-5.85748	B_cell__HCLS1	HCLS1	B_cell
0.401629114012283	-2.63218	0.409344028916563	0.690004949504892	0.970102396973054	-5.8588	B_cell__MARCH1	2025-03-01	B_cell
0.368138765572203	4.49283860890062	0.407759445011278	0.691134711200292	0.970102396973054	-5.85945	B_cell__SERP1	SERP1	B_cell
-0.329978	-0.136244	-0.405111	0.693024446721891	0.970102396973054	-5.86053	B_cell__LUC7L3	LUC7L3	B_cell
-0.377185	-1.83499	-0.40035	0.696427615373748	0.970102396973054	-5.86244	B_cell__MAN1A2	MAN1A2	B_cell
0.34942997598393	-2.88293	0.399939176594495	0.696721764966483	0.970102396973054	-5.86261	B_cell__ST8SIA4	ST8SIA4	B_cell
-0.333216	-7.67454	-0.398001	0.698109237286271	0.970102396973054	-5.86338	B_cell__VPS13D	VPS13D	B_cell
-0.326822	0.404323864918476	-0.397813	0.698244300987887	0.970102396973054	-5.86346	B_cell__JMJD1C	JMJD1C	B_cell
-0.42502	-6.02303	-0.39747	0.698490073941743	0.970102396973054	-5.86359	B_cell__GRK5	GRK5	B_cell
-0.421626	4.26464055755229	-0.396561	0.699140783568285	0.970102396973054	-5.86395	B_cell__TXNIP	TXNIP	B_cell
-0.448616	-3.7588	-0.394078	0.70092169436118	0.970102396973054	-5.86494	B_cell__RASA2	RASA2	B_cell
-0.340466	-5.56491	-0.390756	0.703306165159284	0.970102396973054	-5.86624	B_cell__STIM1	STIM1	B_cell
0.342077394985979	-2.08788	0.389033535011168	0.704544429670371	0.970102396973054	-5.86691	B_cell__ARHGAP15	ARHGAP15	B_cell
0.344917981972938	4.19613631147502	0.382338749679183	0.709364390248504	0.970102396973054	-5.8695	B_cell__SPCS3	SPCS3	B_cell
0.38020782438858	-1.95142	0.380873063781036	0.710421400811237	0.970102396973054	-5.87006	B_cell__GTF2I	GTF2I	B_cell
-0.323071	0.328134079598837	-0.372254	0.716650294454023	0.970102396973054	-5.87331	B_cell__ATP2B1	ATP2B1	B_cell
-0.292414	0.6983841723224	-0.366664	0.720700844038984	0.970102396973054	-5.87538	B_cell__WSB1	WSB1	B_cell
-0.311164	-2.7075	-0.364895	0.721984721612337	0.970102396973054	-5.87603	B_cell__CNOT4	CNOT4	B_cell
0.315032984756805	-0.414572	0.36446523700156	0.722297111107117	0.970102396973054	-5.87619	B_cell__NCOR1	NCOR1	B_cell
0.302729405836675	-0.856437	0.363903244011365	0.722705247078543	0.970102396973054	-5.8764	B_cell__BBX	BBX	B_cell
0.417252209080263	-3.85522	0.362994257165168	0.723365570452436	0.970102396973054	-5.87673	B_cell__KLHL5	KLHL5	B_cell
-0.338067	4.46017375831522	-0.362061	0.724044022947848	0.970102396973054	-5.87707	B_cell__SSR3	SSR3	B_cell
0.304859574726178	3.11906447982838	0.359565637667217	0.725858360230693	0.970102396973054	-5.87797	B_cell__UBE2E2	UBE2E2	B_cell
0.293389345289032	0.591797603900565	0.357960098857162	0.727026812856327	0.970102396973054	-5.87855	B_cell__GNL3	GNL3	B_cell
0.311249082105385	-2.49845	0.355208006589645	0.72903136660624	0.970102396973054	-5.87953	B_cell__PRKCB	PRKCB	B_cell
-0.296123	-1.71772	-0.354175	0.729784568470851	0.970102396973054	-5.8799	B_cell__PJA2	PJA2	B_cell
0.330835335646009	-3.90707	0.352831806605694	0.73076382939236	0.970102396973054	-5.88038	B_cell__KAT6B	KAT6B	B_cell
0.311126018563173	2.03785296002562	0.351273050257805	0.731901153338073	0.970102396973054	-5.88093	B_cell__SP140	SP140	B_cell
-0.412322	3.10877130750796	-0.348683	0.733792603486396	0.970102396973054	-5.88184	B_cell__PIP4K2A	PIP4K2A	B_cell
-0.479864	-3.86466	-0.348414	0.733989093960465	0.970102396973054	-5.88193	B_cell__LYST	LYST	B_cell
-0.339468	-2.10839	-0.347217	0.734863922263932	0.970102396973054	-5.88235	B_cell__CCDC88C	CCDC88C	B_cell
-0.341291	0.343793403098296	-0.34662	0.735300230440438	0.970102396973054	-5.88256	B_cell__PDXK	PDXK	B_cell
-0.29649	-4.0955	-0.346195	0.735610637898026	0.970102396973054	-5.88271	B_cell__UBR2	UBR2	B_cell
-0.309457	-2.3194	-0.346116	0.735668740061184	0.970102396973054	-5.88273	B_cell__GOLPH3	GOLPH3	B_cell
-0.318401	0.699912339043611	-0.346112	0.735671865638832	0.970102396973054	-5.88274	B_cell__HDLBP	HDLBP	B_cell
-0.315045	-1.64828	-0.344295	0.737000714306155	0.970102396973054	-5.88337	B_cell__PPP3CA	PPP3CA	B_cell
-0.285536	-2.12159	-0.342607	0.73823612364099	0.970102396973054	-5.88395	B_cell__UTRN	UTRN	B_cell
0.363803337662125	-2.58641	0.340772161704551	0.739580338171622	0.970102396973054	-5.88458	B_cell__VPS13C	VPS13C	B_cell
-0.344613	1.18100857290976	-0.34027	0.739948413996323	0.970102396973054	-5.88475	B_cell__CSDE1	CSDE1	B_cell
0.315515519502783	1.67325414096937	0.339499167513247	0.740513297682803	0.970102396973054	-5.88501	B_cell__ASH1L	ASH1L	B_cell
-0.282554	1.58634155491191	-0.3379	0.741685588767825	0.970102396973054	-5.88556	B_cell__RHOH	RHOH	B_cell
-0.356584	-3.19701	-0.332021	0.746002990056301	0.970102396973054	-5.88754	B_cell__SP140L	SP140L	B_cell
0.385800530276759	-5.12915	0.329796127045617	0.747638706399685	0.970102396973054	-5.88828	B_cell__UMAD1	UMAD1	B_cell
-0.291806	-5.53571	-0.32852	0.748577667511387	0.970102396973054	-5.8887	B_cell__LRBA	LRBA	B_cell
-0.26642	0.358142997962775	-0.32838	0.748680407626289	0.970102396973054	-5.88874	B_cell__SP100	SP100	B_cell
-0.265172	-2.40235	-0.326452	0.750100111867347	0.970102396973054	-5.88938	B_cell__RBM26	RBM26	B_cell
0.308671421389515	0.441537144913737	0.326005184401299	0.75042930628997	0.970102396973054	-5.88953	B_cell__BCLAF1	BCLAF1	B_cell
-0.321588	2.89963220378957	-0.32572	0.750639076847445	0.970102396973054	-5.88962	B_cell__SAFB	SAFB	B_cell
-0.272131	-0.547446	-0.324937	0.751216279588187	0.970102396973054	-5.88988	B_cell__WDR33	WDR33	B_cell
0.262547785613418	-0.752298	0.32250549422644	0.753008815092893	0.970102396973054	-5.89067	B_cell__WIPF1	WIPF1	B_cell
0.306315020018313	-4.69383	0.321716409888645	0.753590859143053	0.970102396973054	-5.89092	B_cell__NFAT5	NFAT5	B_cell
-0.315961	-5.28662	-0.3206	0.754414694283544	0.970102396973054	-5.89128	B_cell__ARFGEF2	ARFGEF2	B_cell
-0.359914	-4.59512	-0.317941	0.756377972862385	0.970102396973054	-5.89214	B_cell__CCDC6	CCDC6	B_cell
-0.258634	-1.11113	-0.317476	0.756721321485094	0.970102396973054	-5.89229	B_cell__PAFAH1B1	PAFAH1B1	B_cell
0.282449813919142	-4.2662	0.316679080299626	0.75731023664871	0.970102396973054	-5.89254	B_cell__PDS5A	PDS5A	B_cell
-0.317271	-5.88109	-0.316459	0.757472557210763	0.970102396973054	-5.89261	B_cell__HTT	HTT	B_cell
-0.303872	2.67884886675367	-0.31577	0.757981939147367	0.970102396973054	-5.89283	B_cell__LMAN1	LMAN1	B_cell
-0.294777	1.04801641954829	-0.315416	0.75824400484449	0.970102396973054	-5.89294	B_cell__OS9	OS9	B_cell
0.280988897690842	-3.32104	0.314973824042922	0.758570791617687	0.970102396973054	-5.89308	B_cell__MAN2A1	MAN2A1	B_cell
-0.286316	-6.53348	-0.314007	0.759286053088442	0.970102396973054	-5.89339	B_cell__VPS13B	VPS13B	B_cell
-0.29923	-3.5357	-0.313971	0.759312287683621	0.970102396973054	-5.8934	B_cell__CAB39	CAB39	B_cell
-0.294527	0.149322375283669	-0.313108	0.75995111556333	0.970102396973054	-5.89367	B_cell__TNRC6B	TNRC6B	B_cell
0.368201399347379	-3.26871	0.312633907892521	0.76030168757834	0.970102396973054	-5.89382	B_cell__DENND1B	DENND1B	B_cell
0.278701671105236	-0.240938	0.310328624645963	0.762008302371267	0.970102396973054	-5.89454	B_cell__GCC2	GCC2	B_cell
0.283269461801223	-4.92709	0.308632389005011	0.763264878472363	0.970102396973054	-5.89507	B_cell__DLG1	DLG1	B_cell
-0.271869	-1.7718	-0.30784	0.763852058859856	0.970102396973054	-5.89532	B_cell__USP15	USP15	B_cell
0.282143816872115	-0.798972	0.303382093886677	0.767158801002488	0.970102396973054	-5.89669	B_cell__NKTR	NKTR	B_cell
0.322535675500155	8.85022931343376	0.303286117071576	0.767230045693726	0.970102396973054	-5.89672	B_cell__HERPUD1	HERPUD1	B_cell
0.508363081349609	-7.49969	0.30022019160147	0.769507092931458	0.970102396973054	-5.89765	B_cell__USP24	USP24	B_cell
0.256434151719452	3.13688495365162	0.299970179192695	0.769692876072786	0.970102396973054	-5.89773	B_cell__HSPA8	HSPA8	B_cell
-0.340072	-4.26546	-0.29928	0.770205454254447	0.970102396973054	-5.89793	B_cell__GOLGA3	GOLGA3	B_cell
-0.241376	2.36041517558844	-0.299115	0.770328580057922	0.970102396973054	-5.89798	B_cell__SRSF2	SRSF2	B_cell
-0.244649	1.39415099312702	-0.298554	0.770745207860403	0.970102396973054	-5.89815	B_cell__UFM1	UFM1	B_cell
-0.254547	-1.77489	-0.297673	0.771400280071923	0.970102396973054	-5.89842	B_cell__FUBP1	FUBP1	B_cell
-0.278771	-0.114959	-0.295786	0.772804398952622	0.970102396973054	-5.89898	B_cell__CDC42SE2	CDC42SE2	B_cell
0.338327510256283	0.099596335655385	0.295369998709403	0.773113926012187	0.970102396973054	-5.89911	B_cell__TTC3	TTC3	B_cell
-0.250415	-7.62486	-0.293373	0.774600839274754	0.970102396973054	-5.8997	B_cell__HECTD4	HECTD4	B_cell
-0.26304	-0.894354	-0.291217	0.776206677305726	0.970102396973054	-5.90033	B_cell__ENTPD1	ENTPD1	B_cell
0.250335205005912	-4.76847	0.290661875556912	0.776620456113843	0.970102396973054	-5.9005	B_cell__IQSEC1	IQSEC1	B_cell
0.296472341619551	2.65032770437541	0.286134841852398	0.779997010730733	0.970102396973054	-5.90181	B_cell__TTC17	TTC17	B_cell
0.256814105206826	0.4128536482032	0.283819699958918	0.781725626705847	0.970102396973054	-5.90248	B_cell__SLAMF7	SLAMF7	B_cell
-0.265445	0.986458318521002	-0.282804	0.782484097212877	0.970102396973054	-5.90277	B_cell__EIF3A	EIF3A	B_cell
-0.231408	-0.809687	-0.282208	0.782929529993453	0.970102396973054	-5.90294	B_cell__ILF3	ILF3	B_cell
0.255220995965033	-4.43544	0.281673996829024	0.783328827533067	0.970102396973054	-5.90309	B_cell__DENND3	DENND3	B_cell
-0.249455	-1.24777	-0.281468	0.783482580248078	0.970102396973054	-5.90315	B_cell__ITSN2	ITSN2	B_cell
0.22584150541644	-0.482333	0.280183178318533	0.7844433371695	0.970102396973054	-5.90351	B_cell__ZC3HAV1	ZC3HAV1	B_cell
-0.226508	1.8330595090168	-0.279675	0.784823658247268	0.970102396973054	-5.90365	B_cell__HNRNPA3	HNRNPA3	B_cell
0.342008333972775	-5.15542	0.278759647622696	0.785508013743363	0.970102396973054	-5.90391	B_cell__CMIP	CMIP	B_cell
-0.248657	-4.80429	-0.274572	0.788642936736118	0.970119890177927	-5.90508	B_cell__AGO3	AGO3	B_cell
0.236672731018651	-4.77667	0.274345343937729	0.788812424422387	0.970119890177927	-5.90514	B_cell__ARID1B	ARID1B	B_cell
0.219687679862719	5.13510819715309	0.273494567535838	0.789449789173131	0.970119890177927	-5.90538	B_cell__DDX5	DDX5	B_cell
0.224163974774007	3.49529552924682	0.269566723627143	0.792394433134922	0.97212628303473	-5.90645	B_cell__EZR	EZR	B_cell
0.248037774689117	-0.278304	0.267113809199666	0.794235060616633	0.972773851102356	-5.90712	B_cell__RAP1A	RAP1A	B_cell
-0.214093	-1.08441	-0.262803	0.797473283946162	0.973109091124758	-5.90827	B_cell__TNFAIP8	TNFAIP8	B_cell
0.213445204891814	3.01642	0.261053060042602	0.798788525355317	0.973109091124758	-5.90873	B_cell__HNRNPDL	HNRNPDL	B_cell
0.340117656664666	18.8626352125045	0.260700180112841	0.799053887540402	0.973109091124758	-5.90883	B_cell__IGHA1	IGHA1	B_cell
-0.353046	-2.32569	-0.258018	0.801071614021712	0.973109091124758	-5.90953	B_cell__SYNE2	SYNE2	B_cell
-0.250282	-1.22795	-0.258014	0.801074960305131	0.973109091124758	-5.90953	B_cell__PRDM2	PRDM2	B_cell
0.33842443451917	4.58222200426121	0.256136485299414	0.802488110147112	0.973230261242242	-5.91002	B_cell__PDE7A	PDE7A	B_cell
0.205981958922517	1.45570955637055	0.251178854698198	0.806223700188945	0.976163009542497	-5.91129	B_cell__ANKRD12	ANKRD12	B_cell
0.202637521282595	-4.79709	0.248232317338159	0.808446319976561	0.976890289738449	-5.91203	B_cell__PHKB	PHKB	B_cell
-0.262146	1.26432183068173	-0.246888	0.809461049796771	0.976890289738449	-5.91236	B_cell__PRDM1	PRDM1	B_cell
-0.211913	-3.20939	-0.240226	0.814494171730438	0.98136614837765	-5.914	B_cell__WNK1	WNK1	B_cell
-0.199688	-2.53109	-0.237931	0.816230788520479	0.981862036191031	-5.91456	B_cell__SRPK2	SRPK2	B_cell
-0.207301	-0.343681	-0.227799	0.823907104907912	0.987557852993667	-5.91694	B_cell__FAM49B	FAM49B	B_cell
-0.206634	-2.30046	-0.227176	0.824379841981439	0.987557852993667	-5.91709	B_cell__RRBP1	RRBP1	B_cell
-0.254004	-6.95605	-0.225204	0.825875984086536	0.987557852993667	-5.91754	B_cell__PI4KA	PI4KA	B_cell
-0.196703	3.00608876104469	-0.223912	0.826857200106105	0.987557852993667	-5.91783	B_cell__SENP6	SENP6	B_cell
-0.186558	-0.0224219	-0.222895	0.827629455747729	0.987557852993667	-5.91806	B_cell__SCAF11	SCAF11	B_cell
-0.175086	0.459299446676617	-0.21777	0.831524420642869	0.989474359851373	-5.9192	B_cell__SRSF11	SRSF11	B_cell
0.183494957872841	-1.31712	0.216927894654808	0.832164680558353	0.989474359851373	-5.91939	B_cell__FNDC3A	FNDC3A	B_cell
0.235047560202317	-1.85056	0.214548985019854	0.833974572497553	0.989474359851373	-5.91991	B_cell__PCM1	PCM1	B_cell
0.188968339394354	-3.15682	0.210386086387908	0.837144141859773	0.989474359851373	-5.9208	B_cell__CCDC91	CCDC91	B_cell
-0.204834	-2.09222	-0.209347	0.837936086166942	0.989474359851373	-5.92102	B_cell__DUSP22	DUSP22	B_cell
-0.232271	0.520242224594943	-0.209338	0.83794267539723	0.989474359851373	-5.92102	B_cell__SEC61A1	SEC61A1	B_cell
-0.172091	-4.69183	-0.208498	0.838582858281596	0.989474359851373	-5.9212	B_cell__CREBBP	CREBBP	B_cell
-0.171604	-0.523283	-0.204266	0.841808973973653	0.991190363543614	-5.92208	B_cell__TM9SF2	TM9SF2	B_cell
0.21466228476207	6.16039040267751	0.20235669124274	0.843266066208815	0.991190363543614	-5.92248	B_cell__ARID2	ARID2	B_cell
0.179993102351314	-2.15719	0.199802944592598	0.845215426456783	0.991190363543614	-5.923	B_cell__XRN1	XRN1	B_cell
0.16965576586831	-1.2433	0.199577284506472	0.845387732469047	0.991190363543614	-5.92304	B_cell__SH3KBP1	SH3KBP1	B_cell
-0.189901	-2.24766	-0.197243	0.847170904029087	0.991711911351586	-5.92351	B_cell__RCSD1	RCSD1	B_cell
0.225798421406442	-0.240788	0.194812981869092	0.849027536465325	0.992074951664683	-5.92399	B_cell__CREB3L2	CREB3L2	B_cell
0.16303690920758	-1.43411	0.193237147844068	0.850232244629591	0.992074951664683	-5.9243	B_cell__MARCH6	2025-03-06	B_cell
-0.169564	-4.20731	-0.191583	0.85149752936402	0.992074951664683	-5.92462	B_cell__ANKRD17	ANKRD17	B_cell
-0.151882	4.05643418631965	-0.18769	0.854476309496202	0.99398264574048	-5.92537	B_cell__ARPC2	ARPC2	B_cell
-0.188929	-1.14193	-0.185449	0.85619174006163	0.994417052328633	-5.92579	B_cell__PDE4B	PDE4B	B_cell
-0.19233	-4.64066	-0.181002	0.859599144208619	0.995513948494156	-5.92662	B_cell__SNX29	SNX29	B_cell
0.145370995393429	-7.38739	0.172461838645016	0.866150807886422	0.995513948494156	-5.92815	B_cell__MAML2	MAML2	B_cell
-0.199377	-2.13386	-0.17183	0.866635760022722	0.995513948494156	-5.92826	B_cell__PLCG2	PLCG2	B_cell
-0.149253	0.467078632261775	-0.171739	0.866706077800004	0.995513948494156	-5.92827	B_cell__ANXA6	ANXA6	B_cell
-0.140848	-3.20862	-0.170765	0.867453582408945	0.995513948494156	-5.92844	B_cell__CELF1	CELF1	B_cell
0.196895351677985	-7.35647	0.168605169206716	0.869112931719616	0.995513948494156	-5.92881	B_cell__TRAPPC9	TRAPPC9	B_cell
-0.163678	-0.523969	-0.166693	0.870582015773423	0.995513948494156	-5.92914	B_cell__ST6GAL1	ST6GAL1	B_cell
-0.149415	0.951026693263583	-0.165996	0.871118166378413	0.995513948494156	-5.92926	B_cell__TAX1BP1	TAX1BP1	B_cell
-0.172103	-1.84977	-0.162834	0.873549049976646	0.995513948494156	-5.92978	B_cell__PHF3	PHF3	B_cell
0.165718068300317	-3.58683	0.162605978321375	0.873724768137169	0.995513948494156	-5.92982	B_cell__ACAP2	ACAP2	B_cell
-0.141043	0.144677872623874	-0.159637	0.876009221990718	0.995513948494156	-5.93031	B_cell__SF3B1	SF3B1	B_cell
-0.137302	-2.39257	-0.157812	0.877413309102745	0.995513948494156	-5.9306	B_cell__IKZF1	IKZF1	B_cell
0.195779118787015	-5.07876	0.156826122202051	0.878172620991691	0.995513948494156	-5.93076	B_cell__DGKD	DGKD	B_cell
-0.130958	-1.05303	-0.156568	0.878371241392739	0.995513948494156	-5.9308	B_cell__HSH2D	HSH2D	B_cell
-0.192322	-2.63619	-0.156406	0.878496393863995	0.995513948494156	-5.93082	B_cell__STRBP	STRBP	B_cell
0.137941868318885	-3.04135	0.156229832763648	0.878631744015085	0.995513948494156	-5.93085	B_cell__MBNL2	MBNL2	B_cell
-0.154829	-0.529611	-0.151496	0.882277906436737	0.996764425910931	-5.93159	B_cell__TP53INP1	TP53INP1	B_cell
-0.125912	-1.46532	-0.151305	0.882425726582417	0.996764425910931	-5.93162	B_cell__PPP1R12A	PPP1R12A	B_cell
0.127311951797082	4.99506112112529	0.147705755290938	0.88519999905909	0.996769609152166	-5.93216	B_cell__AFF1	AFF1	B_cell
-0.139242	0.123002563368828	-0.142214	0.889436411735273	0.996769609152166	-5.93297	B_cell__FAM107B	FAM107B	B_cell
-0.12555	6.21165969556201	-0.138222	0.892518055652694	0.996769609152166	-5.93354	B_cell__SRGN	SRGN	B_cell
0.113936584225679	-3.36624	0.137490871170322	0.893082916862226	0.996769609152166	-5.93364	B_cell__ETV6	ETV6	B_cell
-0.113281	1.1673478559497	-0.136229	0.894057402751653	0.996769609152166	-5.93382	B_cell__SFPQ	SFPQ	B_cell
-0.114397	1.32597491386725	-0.131539	0.897681636711931	0.996769609152166	-5.93445	B_cell__IFI16	IFI16	B_cell
-0.123109	-2.87856	-0.126712	0.901414234752857	0.996769609152166	-5.93508	B_cell__CNTRL	CNTRL	B_cell
-0.114189	-2.36164	-0.124176	0.903376310682795	0.996769609152166	-5.93541	B_cell__ZNF644	ZNF644	B_cell
-0.137848	1.19549557103554	-0.123722	0.903727267620416	0.996769609152166	-5.93546	B_cell__CCM2	CCM2	B_cell
-0.10655	-1.03838	-0.122598	0.904597542411895	0.996769609152166	-5.9356	B_cell__EPC1	EPC1	B_cell
-0.209965	7.34863253965941	-0.119845	0.90672838342499	0.996769609152166	-5.93594	B_cell__MGAT5	MGAT5	B_cell
0.109677490969504	-2.31492	0.118021346644617	0.908140357528267	0.996769609152166	-5.93616	B_cell__ANKRD44	ANKRD44	B_cell
-0.101506	-2.89908	-0.117578	0.90848335299125	0.996769609152166	-5.93622	B_cell__GAK	GAK	B_cell
-0.106003	-1.49082	-0.117542	0.908511619167764	0.996769609152166	-5.93622	B_cell__SEC31A	SEC31A	B_cell
-0.103864	-2.35545	-0.116839	0.909056134877746	0.996769609152166	-5.9363	B_cell__GGA2	GGA2	B_cell
-0.126133	0.643691513571323	-0.116208	0.909544928187046	0.996769609152166	-5.93638	B_cell__IRF4	IRF4	B_cell
0.0898969103629104	-0.49463	0.111099399644801	0.913503085770639	0.996769609152166	-5.93697	B_cell__GGNBP2	GGNBP2	B_cell
0.102626658608238	-0.264463	0.108355399248153	0.915630238032813	0.996769609152166	-5.93727	B_cell__LCP1	LCP1	B_cell
-0.0869777	-2.82393	-0.103402	0.919472212526062	0.996769609152166	-5.93781	B_cell__ZMYM2	ZMYM2	B_cell
-0.0955731	0.099621027787844	-0.0985711	0.923220501059242	0.996769609152166	-5.9383	B_cell__TRABD	TRABD	B_cell
-0.0781112	-3.31707	-0.0947185	0.926211483746983	0.996769609152166	-5.93868	B_cell__SETD5	SETD5	B_cell
-0.0772554	-0.737059	-0.0944119	0.926449519733606	0.996769609152166	-5.93871	B_cell__MYCBP2	MYCBP2	B_cell
-0.0896608	-1.20054	-0.0941367	0.926663220581308	0.996769609152166	-5.93873	B_cell__ZBP1	ZBP1	B_cell
-0.124156	-3.9921	-0.0938761	0.926865583789428	0.996769609152166	-5.93876	B_cell__ANKRD36C	ANKRD36C	B_cell
0.103845172929677	-2.81967	0.0934710430797981	0.927180159078146	0.996769609152166	-5.9388	B_cell__GPCPD1	GPCPD1	B_cell
-0.0950051	-2.99315	-0.092116	0.928232585357677	0.996769609152166	-5.93893	B_cell__CLIP1	CLIP1	B_cell
-0.0825143	3.65744192382305	-0.09184	0.92844690661801	0.996769609152166	-5.93895	B_cell__LAPTM5	LAPTM5	B_cell
-0.0766864	-1.24083	-0.0886298	0.930940771513996	0.996769609152166	-5.93925	B_cell__ROCK1	ROCK1	B_cell
-0.0933927	0.61840080692659	-0.0884348	0.931092285069474	0.996769609152166	-5.93926	B_cell__ELL2	ELL2	B_cell
0.085632959611446	1.34319914365275	0.0870419299850085	0.93217457844431	0.996769609152166	-5.93939	B_cell__POU2AF1	POU2AF1	B_cell
0.0689086254615801	-0.0472178	0.0859914878304213	0.93299090349943	0.996769609152166	-5.93948	B_cell__TOP1	TOP1	B_cell
-0.068965	3.50246934304218	-0.0853308	0.933504380839304	0.996769609152166	-5.93954	B_cell__HNRNPA2B1	HNRNPA2B1	B_cell
-0.0919889	-2.46647	-0.0849971	0.933763707319558	0.996769609152166	-5.93957	B_cell__SYNRG	SYNRG	B_cell
0.109470190460372	-6.29601	0.0842952065511006	0.934309295456325	0.996769609152166	-5.93963	B_cell__TBC1D5	TBC1D5	B_cell
-0.068711	0.972844725917185	-0.0838934	0.93462164059349	0.996769609152166	-5.93966	B_cell__ACTR3	ACTR3	B_cell
0.075004018340806	0.423610242301481	0.0819965824851197	0.936096169901023	0.996769609152166	-5.93982	B_cell__ERN1	ERN1	B_cell
-0.0735314	-4.29183	-0.0806058	0.937177520656542	0.996769609152166	-5.93993	B_cell__ADAM19	ADAM19	B_cell
-0.0929365	-5.60435	-0.0763529	0.940484918498341	0.996769609152166	-5.94027	B_cell__SPPL3	SPPL3	B_cell
-0.062078	-3.78589	-0.0763306	0.940502267212671	0.996769609152166	-5.94027	B_cell__H3F3A	H3F3A	B_cell
0.0666927117723301	0.920609249807466	0.0752066750570463	0.941376522188198	0.996769609152166	-5.94036	B_cell__MSN	MSN	B_cell
-0.0716061	-3.96057	-0.0749093	0.941607891063116	0.996769609152166	-5.94038	B_cell__ZEB1	ZEB1	B_cell
-0.0778213	-3.01079	-0.0733772	0.942799740686705	0.996769609152166	-5.9405	B_cell__ARIH1	ARIH1	B_cell
0.0600767146899832	-3.0462	0.0719004999510518	0.943948736592433	0.996769609152166	-5.94061	B_cell__CDK14	CDK14	B_cell
0.0572906318689697	-6.09831	0.0717551371736563	0.944061844783443	0.996769609152166	-5.94062	B_cell__KIAA0319L	KIAA0319L	B_cell
0.0606762980161245	-4.88227	0.070196888013437	0.945274413773511	0.996769609152166	-5.94073	B_cell__PHC3	PHC3	B_cell
-0.0566407	-1.62695	-0.0687661	0.946387895887295	0.996769609152166	-5.94083	B_cell__CD53	CD53	B_cell
0.0623817010246784	-5.21134	0.0683507578281533	0.946711187252335	0.996769609152166	-5.94086	B_cell__RPAP2	RPAP2	B_cell
-0.0713991	-5.13989	-0.0679818	0.946998387102733	0.996769609152166	-5.94089	B_cell__PREX1	PREX1	B_cell
-0.0580647	-3.15895	-0.0618825	0.95174673624863	0.998758841952561	-5.94129	B_cell__KMT2A	KMT2A	B_cell
-0.0509262	0.406583725958356	-0.0597456	0.953410776009389	0.998758841952561	-5.94142	B_cell__SEC14L1	SEC14L1	B_cell
0.0624708183884348	-5.51111	0.0559543961285396	0.956363659491855	0.998758841952561	-5.94164	B_cell__KIAA1109	KIAA1109	B_cell
0.0515380808015695	-3.23928	0.055320714647822	0.956857287508592	0.998758841952561	-5.94168	B_cell__EPS15	EPS15	B_cell
-0.0435428	1.66073189154751	-0.0498616	0.961110594037889	0.998758841952561	-5.94197	B_cell__CLK1	CLK1	B_cell
-0.0485253	-2.81723	-0.0494189	0.961455550832522	0.998758841952561	-5.94199	B_cell__LUC7L2	LUC7L2	B_cell
-0.038014	-2.89919	-0.0465303	0.963706696868184	0.998758841952561	-5.94213	B_cell__UBE2D3	UBE2D3	B_cell
0.0428094495379981	-2.779	0.0462831590354476	0.963899350151084	0.998758841952561	-5.94215	B_cell__RB1	RB1	B_cell
-0.0548453	2.56395671133976	-0.0398244	0.968934054076784	0.998758841952561	-5.94243	B_cell__HIST1H1D	HIST1H1D	B_cell
-0.0321231	2.12407800641189	-0.038765	0.969759938668078	0.998758841952561	-5.94247	B_cell__UBXN4	UBXN4	B_cell
0.0370154854824297	-2.45888	0.0385666217963746	0.969914638875704	0.998758841952561	-5.94248	B_cell__SECISBP2	SECISBP2	B_cell
0.0382579157033052	1.38462603947272	0.0383598928299439	0.97007581930556	0.998758841952561	-5.94249	B_cell__CELF2	CELF2	B_cell
0.0369237259721682	-0.107107	0.0380191049314569	0.970341524535059	0.998758841952561	-5.9425	B_cell__GOLGB1	GOLGB1	B_cell
0.0424324572478514	-2.5714	0.0376395645975797	0.970637448643374	0.998758841952561	-5.94251	B_cell__DAPP1	DAPP1	B_cell
-0.0316941	-1.82264	-0.0366672	0.971395610450662	0.998758841952561	-5.94255	B_cell__TM9SF3	TM9SF3	B_cell
0.0307838368043154	-4.30652	0.0336943431287988	0.973713765628414	0.998758841952561	-5.94266	B_cell__RALGAPA1	RALGAPA1	B_cell
-0.0257086	2.42202207153441	-0.0307215	0.976032165275205	0.998758841952561	-5.94275	B_cell__BIRC3	BIRC3	B_cell
0.0262772571447065	-2.15577	0.0296478168567676	0.976869538088826	0.998758841952561	-5.94279	B_cell__CNOT6L	CNOT6L	B_cell
-0.0248068	-5.68821e-05	-0.02953	0.976961444994217	0.998758841952561	-5.94279	B_cell__SEC63	SEC63	B_cell
0.0258639922354865	-3.27868	0.0219092575363983	0.982905724483118	0.998758841952561	-5.94299	B_cell__TBC1D9	TBC1D9	B_cell
0.0160499973228182	-2.63066	0.0197696939128315	0.984574828026552	0.998758841952561	-5.94303	B_cell__GALNT2	GALNT2	B_cell
-0.0150806	1.35262293394962	-0.0186557	0.98544389071309	0.998758841952561	-5.94306	B_cell__DBNL	DBNL	B_cell
0.0163558284260496	-0.516492	0.0182569563260202	0.985754982698744	0.998758841952561	-5.94306	B_cell__TANK	TANK	B_cell
0.0147967846565811	-2.92727	0.0182081358945239	0.985793070321688	0.998758841952561	-5.94306	B_cell__LUC7L	LUC7L	B_cell
-0.0140274	-0.744946	-0.0155981	0.987829360284832	0.998758841952561	-5.94311	B_cell__WASF2	WASF2	B_cell
0.0134960453955562	-2.61756	0.0145441429919273	0.988651659932477	0.998758841952561	-5.94313	B_cell__SUCLG2	SUCLG2	B_cell
0.011065132375465	-3.11747	0.0132813299844665	0.989636927336467	0.998758841952561	-5.94314	B_cell__PIAS1	PIAS1	B_cell
-0.0106522	1.53759536837312	-0.0131362	0.989750149630276	0.998758841952561	-5.94315	B_cell__GRB2	GRB2	B_cell
-0.0103668	-5.69695	-0.0124277	0.990302968474234	0.998758841952561	-5.94315	B_cell__DYM	DYM	B_cell
-0.012237	-1.03891	-0.0123776	0.990342030739514	0.998758841952561	-5.94316	B_cell__CCND3	CCND3	B_cell
-0.00817195	-3.62747	-0.00902272	0.992959684174392	0.998758841952561	-5.94319	B_cell__DENND4A	DENND4A	B_cell
0.00581223460919428	-0.673942	0.00702772227409467	0.994516326612871	0.998758841952561	-5.94321	B_cell__NGLY1	NGLY1	B_cell
0.00677797409599064	6.36575934306167	0.00610361937709834	0.995237385944981	0.998758841952561	-5.94321	B_cell__CLASP2	CLASP2	B_cell
-0.00609429	-5.77167	-0.00589493	0.995400219032205	0.998758841952561	-5.94322	B_cell__LIMD1	LIMD1	B_cell
0.00222108277364682	-6.13135	0.00229345050544462	0.998210425260714	0.998758841952561	-5.94323	B_cell__TRAK1	TRAK1	B_cell
-0.00162761	-5.09802	-0.00168261	0.998687066050893	0.998758841952561	-5.94323	B_cell__MLLT10	MLLT10	B_cell
-0.00136184	-2.80551	-0.00159062	0.998758841952561	0.998758841952561	-5.94323	B_cell__HECTD1	HECTD1	B_cell

## Sheet: Table S16(EP_DEG)
Table S16: The Differential Genes of Epithelial Cells in the Testing Set
logFC	AveExpr	t	P.Value	adj.P.Val	B	feature	gene	cell_type
4.8137132970456	-0.0286028	12.1078923866324	7.58479567773322e-06	0.0408085823555134	3.75088972699761	Epithelial_cells__SORD	SORD	Epithelial_cells
4.39604055156654	-0.442717	11.9474474121307	8.27424621969048e-06	0.0408085823555134	3.69446	Epithelial_cells__VNN2	VNN2	Epithelial_cells
-3.95557	-0.752186	-10.8192	1.5752378142244e-05	0.0492247985774707	3.25809205719655	Epithelial_cells__SLC27A3	SLC27A3	Epithelial_cells
3.85195547682007	0.531791203524636	10.4292220795795	1.9961394394757e-05	0.0492247985774707	3.08944095944161	Epithelial_cells__KCNN4	KCNN4	Epithelial_cells
5.09905360406605	0.532189614192828	9.39834065046457	3.88614889344554e-05	0.0766659453698936	2.59249951922074	Epithelial_cells__C4ORF48	C4ORF48	Epithelial_cells
-3.23513	-1.20201	-8.94123	5.33127000057512e-05	0.0819379807740912	2.34555255423415	Epithelial_cells__MCCC1	MCCC1	Epithelial_cells
-3.24835	-1.10725	-8.81914	5.81473910602837e-05	0.0819379807740912	2.27655572109515	Epithelial_cells__MLX	MLX	Epithelial_cells
-3.13421	-0.693904	-8.57338	6.94700905101088e-05	0.0856566215989642	2.13357480236338	Epithelial_cells__MFSD13A	MFSD13A	Epithelial_cells
3.2120593332268	0.977780107432128	8.19357733232365	9.22551929919522e-05	0.0899402223901375	1.90137071899189	Epithelial_cells__HRH1	HRH1	Epithelial_cells
-3.30089	-1.19423	-8.12465	9.72434804485129e-05	0.0899402223901375	1.85770589495244	Epithelial_cells__SLAIN1	SLAIN1	Epithelial_cells
-2.88492	-0.952558	-7.74819	0.000130527381233397	0.0899402223901375	1.61051220088826	Epithelial_cells__FABP5	FABP5	Epithelial_cells
3.16801765033045	0.702260272270934	7.63134256063663	0.000143358409004696	0.0899402223901375	1.53069421916397	Epithelial_cells__RBM38	RBM38	Epithelial_cells
3.87428036451197	-0.218729	7.58169824163059	0.000149237691259559	0.0899402223901375	1.49632468530214	Epithelial_cells__GPR135	GPR135	Epithelial_cells
-3.07941	-0.95902	-7.56114	0.000151751668498094	0.0899402223901375	1.48201252293044	Epithelial_cells__PLLP	PLLP	Epithelial_cells
3.80092654561569	0.756208222946916	7.51513143940701	0.000157554405029236	0.0899402223901375	1.44980472967147	Epithelial_cells__KCTD11	KCTD11	Epithelial_cells
-3.33619	-1.47783	-7.50484	0.000158886679171174	0.0899402223901375	1.44256659712872	Epithelial_cells__C1ORF21	C1ORF21	Epithelial_cells
3.82726433982257	1.27676223719405	7.47920357689884	0.000162260438842675	0.0899402223901375	1.42448785427917	Epithelial_cells__GAS2L1	GAS2L1	Epithelial_cells
-2.94126	-1.06727	-7.4653	0.00016412449341266	0.0899402223901375	1.41464920870042	Epithelial_cells__DCXR	DCXR	Epithelial_cells
2.77110875561173	0.218278837117226	7.33723328891844	0.000182478679127604	0.0912951415162129	1.32299399387832	Epithelial_cells__SLC16A3	SLC16A3	Epithelial_cells
2.82604112960628	-0.475866	7.31397593354163	0.000186055436209455	0.0912951415162129	1.30614364901238	Epithelial_cells__PSD3	PSD3	Epithelial_cells
-3.19366	-1.10722	-7.16986	0.000210070040845581	0.0912951415162129	1.20029956529213	Epithelial_cells__PEPD	PEPD	Epithelial_cells
-2.91649	-1.17155	-7.15797	0.000212202762289202	0.0912951415162129	1.19145673640694	Epithelial_cells__ECHDC3	ECHDC3	Epithelial_cells
-2.70446	0.338249702632537	-7.12106	0.000218981327219125	0.0912951415162129	1.16389515355301	Epithelial_cells__SULT1A2	SULT1A2	Epithelial_cells
3.75975110292682	0.57641508713231	6.99820809321599	0.000243371909416159	0.0912951415162129	1.07095034618275	Epithelial_cells__SUGCT	SUGCT	Epithelial_cells
3.5186065135097	-0.105711	6.9912976218079	0.000244832461056893	0.0912951415162129	1.06566687620352	Epithelial_cells__LPAR1	LPAR1	Epithelial_cells
3.68432808482847	-0.122591	6.92659162535222	0.00025899939649031	0.0912951415162129	1.01590545715534	Epithelial_cells__DNAH1	DNAH1	Epithelial_cells
-2.63099	-0.34837	-6.85933	0.000274715831833663	0.0912951415162129	0.963618384303696	Epithelial_cells__VSIG10	VSIG10	Epithelial_cells
2.73433922692411	-0.893858	6.79847797844422	0.000289867009516165	0.0912951415162129	0.915818235580825	Epithelial_cells__ETV6	ETV6	Epithelial_cells
2.42195191566559	-0.0477455	6.79332206963957	0.000291193521588974	0.0912951415162129	0.911746274194476	Epithelial_cells__TTYH3	TTYH3	Epithelial_cells
2.89557564742448	0.29576767555924	6.77202903022273	0.00029674485587386	0.0912951415162129	0.894893396348618	Epithelial_cells__GCNT1	GCNT1	Epithelial_cells
2.53601240091139	0.227680505058421	6.75748857583523	0.00030060434452528	0.0912951415162129	0.883351293284897	Epithelial_cells__BYSL	BYSL	Epithelial_cells
-2.35804	-0.757808	-6.7477	0.000303234817808304	0.0912951415162129	0.875564628283581	Epithelial_cells__ASAH1	ASAH1	Epithelial_cells
2.51763698677824	1.31567878255772	6.73349539954515	0.000307097390511902	0.0912951415162129	0.864245655996545	Epithelial_cells__COL18A1	COL18A1	Epithelial_cells
2.63329248246164	0.793326980055897	6.61471644911093	0.000341664517748854	0.0912951415162129	0.768551523721974	Epithelial_cells__DGKA	DGKA	Epithelial_cells
-2.44552	-0.241818	-6.55981	0.000359110110612693	0.0912951415162129	0.72368692699682	Epithelial_cells__AK1	AK1	Epithelial_cells
2.29927332558337	-0.537389	6.53565816614804	0.000367101831196364	0.0912951415162129	0.703820597264882	Epithelial_cells__MTMR11	MTMR11	Epithelial_cells
2.27292294214481	0.293397975376776	6.53554670767273	0.000367139169233353	0.0912951415162129	0.703728745885801	Epithelial_cells__ITPKB	ITPKB	Epithelial_cells
2.74960767644916	-0.208334	6.51981542058727	0.000372452273937564	0.0912951415162129	0.6907480020856	Epithelial_cells__SLC51A	SLC51A	Epithelial_cells
-4.38751	-1.13306	-6.51828	0.000372976652310333	0.0912951415162129	0.689476399594874	Epithelial_cells__RENBP	RENBP	Epithelial_cells
-2.62926	-0.740723	-6.5033	0.000378122780617556	0.0912951415162129	0.677086381357466	Epithelial_cells__TNIK	TNIK	Epithelial_cells
2.35314510949078	-1.08964	6.39815475145315	0.0004165974520679	0.0912951415162129	0.589223141502447	Epithelial_cells__ABCG1	ABCG1	Epithelial_cells
-2.51348	0.482795719720066	-6.39274	0.00041869393543749	0.0912951415162129	0.584659874024958	Epithelial_cells__TNNC1	TNNC1	Epithelial_cells
3.61801365610981	-1.0908	6.3918061746532	0.000419058009451114	0.0912951415162129	0.583869632931584	Epithelial_cells__RNF150	RNF150	Epithelial_cells
2.47775420067459	0.156675639384449	6.38294616080396	0.000422519353280395	0.0912951415162129	0.576389026450358	Epithelial_cells__DENND1A	DENND1A	Epithelial_cells
2.39557628788757	0.080829698103309	6.35833547882107	0.000432304196269395	0.0912951415162129	0.555552979722956	Epithelial_cells__PNMA1	PNMA1	Epithelial_cells
-2.18355	-0.340313	-6.26124	0.000473477479288288	0.0912951415162129	0.472525477206161	Epithelial_cells__GSTA4	GSTA4	Epithelial_cells
2.30732444750562	-0.127072	6.24019018864417	0.000482974766920068	0.0912951415162129	0.454351774339833	Epithelial_cells__TTC39C	TTC39C	Epithelial_cells
-2.46566	-0.948379	-6.2133	0.000495422904706939	0.0912951415162129	0.431040088881903	Epithelial_cells__GAB2	GAB2	Epithelial_cells
3.12845210978271	-0.225864	6.20315171287626	0.000500211683286635	0.0912951415162129	0.422220470770852	Epithelial_cells__NCAM1	NCAM1	Epithelial_cells
-2.53095	-1.49911	-6.18604	0.00050841031886769	0.0912951415162129	0.407305965094977	Epithelial_cells__ZNF682	ZNF682	Epithelial_cells
-4.04842	-1.39786	-6.1649	0.000518742354433491	0.0912951415162129	0.388833635593876	Epithelial_cells__LPL	LPL	Epithelial_cells
3.02346421137161	0.744986853175992	6.14651507851144	0.000527924256161504	0.0912951415162129	0.372709651036301	Epithelial_cells__TMEM40	TMEM40	Epithelial_cells
2.53930344532204	-0.949806	6.14125510152087	0.000530584442636766	0.0912951415162129	0.368088153841247	Epithelial_cells__EBF4	EBF4	Epithelial_cells
-3.79837	-0.767674	-6.11911	0.000541948349251848	0.0912951415162129	0.348591499374545	Epithelial_cells__RIMKLA	RIMKLA	Epithelial_cells
3.84439908773037	-0.479576	6.11871388553676	0.000542156505686142	0.0912951415162129	0.348238022671683	Epithelial_cells__TDP1	TDP1	Epithelial_cells
-2.155	-0.140442	-6.11399	0.000544619876373482	0.0912951415162129	0.344064704131129	Epithelial_cells__MTHFR	MTHFR	Epithelial_cells
-3.01709	-0.290314	-6.0961	0.000554049795634677	0.0912951415162129	0.328253741329097	Epithelial_cells__HLF	HLF	Epithelial_cells
-2.3177	-0.960461	-6.08731	0.000558752064303782	0.0912951415162129	0.320465262217556	Epithelial_cells__DUSP16	DUSP16	Epithelial_cells
2.98278825633964	0.434030453853114	6.06291374955626	0.000572043658507324	0.0912951415162129	0.298783819062845	Epithelial_cells__PLCH2	PLCH2	Epithelial_cells
2.27026322647932	-0.16645	6.06007594084693	0.000573612401087344	0.0912951415162129	0.296257	Epithelial_cells__FBLN2	FBLN2	Epithelial_cells
3.14650318025394	1.4255121151963	6.05456623100669	0.000576672003002399	0.0912951415162129	0.291346776592855	Epithelial_cells__BCL11B	BCL11B	Epithelial_cells
-2.15564	-0.548535	-6.03461	0.000587910922261269	0.0912951415162129	0.273522202459675	Epithelial_cells__SCD	SCD	Epithelial_cells
-2.76006	-1.96179	-6.01048	0.000601827613878244	0.0912951415162129	0.251896522042487	Epithelial_cells__RAP1GAP	RAP1GAP	Epithelial_cells
2.96486181049464	0.0609206655643504	6.00932083730922	0.000602502866509885	0.0912951415162129	0.250859417217644	Epithelial_cells__DAPP1	DAPP1	Epithelial_cells
2.75761314574344	0.577056444986529	5.98284410390936	0.000618220458753183	0.0912951415162129	0.227027849980995	Epithelial_cells__PHLDA1	PHLDA1	Epithelial_cells
2.1207241560228	0.411484638948866	5.96126548382808	0.0006313715389401	0.0912951415162129	0.207528703803989	Epithelial_cells__BHLHE41	BHLHE41	Epithelial_cells
3.18528795338431	0.107426718840752	5.93542006555592	0.000647538507442751	0.0912951415162129	0.184083361483272	Epithelial_cells__SIDT1	SIDT1	Epithelial_cells
-2.24099	0.214839663659812	-5.93306	0.000649039280122495	0.0912951415162129	0.181935426676909	Epithelial_cells__SULT1A1	SULT1A1	Epithelial_cells
2.05412544039571	0.0665590722143526	5.90077542865541	0.0006699440136837	0.0912951415162129	0.15250041128081	Epithelial_cells__DUSP4	DUSP4	Epithelial_cells
-2.12528	-0.871365	-5.89046	0.000676782286727191	0.0912951415162129	0.143062353747819	Epithelial_cells__FASN	FASN	Epithelial_cells
-2.33638	-0.810844	-5.8505	0.000704020415259923	0.0912951415162129	0.106353493677296	Epithelial_cells__NECAB3	NECAB3	Epithelial_cells
4.39429374917766	-0.333176	5.84849130451637	0.000705424955045004	0.0912951415162129	0.104497679849954	Epithelial_cells__CCDC40	CCDC40	Epithelial_cells
2.38545447303686	0.0528670536859754	5.84386116951706	0.000708667394576321	0.0912951415162129	0.10022693856339	Epithelial_cells__ST8SIA4	ST8SIA4	Epithelial_cells
2.58147731091357	-0.164486	5.82998544651663	0.000718485068990882	0.0912951415162129	0.0874089407410938	Epithelial_cells__SVOPL	SVOPL	Epithelial_cells
2.34531810957354	0.698743196600502	5.81670160352046	0.000728027213324301	0.0912951415162129	0.0751105228130342	Epithelial_cells__KIAA0825	KIAA0825	Epithelial_cells
-2.23502	-0.434188	-5.80632	0.000735584082688815	0.0912951415162129	0.0654799724196637	Epithelial_cells__PAPSS2	PAPSS2	Epithelial_cells
-2.31464	-0.976414	-5.80552	0.000736166468446433	0.0912951415162129	0.0647417154291094	Epithelial_cells__HPCAL1	HPCAL1	Epithelial_cells
-2.04857	-0.54196	-5.78688	0.000749969297920016	0.0912951415162129	0.0474066056025473	Epithelial_cells__IDI1	IDI1	Epithelial_cells
2.24841364423794	-0.189525	5.76052185299955	0.000769986260115632	0.0912951415162129	0.022803101513734	Epithelial_cells__STEAP3	STEAP3	Epithelial_cells
2.0900961463497	0.142738771577941	5.75432878177988	0.000774775430895544	0.0912951415162129	0.0170075752930643	Epithelial_cells__USP31	USP31	Epithelial_cells
-2.30382	-1.22106	-5.7425	0.000784018546320531	0.0912951415162129	0.00591872703109075	Epithelial_cells__SDC2	SDC2	Epithelial_cells
-2.31993	-0.794564	-5.73414	0.000790617440550841	0.0912951415162129	-0.0019214	Epithelial_cells__LSS	LSS	Epithelial_cells
-2.22313	-0.633656	-5.73085	0.000793235491358574	0.0912951415162129	-0.00501451	Epithelial_cells__SFTPB	SFTPB	Epithelial_cells
2.8227183299568	-0.576297	5.73017868892891	0.000793772837629041	0.0912951415162129	-0.00564814	Epithelial_cells__RHPN2	RHPN2	Epithelial_cells
-2.47883	-0.538686	-5.71551	0.000805565634485397	0.0912951415162129	-0.0194515	Epithelial_cells__CTSH	CTSH	Epithelial_cells
-2.07487	-2.31165	-5.69804	0.000819868054466066	0.0912951415162129	-0.0359344	Epithelial_cells__COMT	COMT	Epithelial_cells
2.2879	0.215033107981547	5.68662557030232	0.000829368971915232	0.0912951415162129	-0.0467319	Epithelial_cells__PHLDB3	PHLDB3	Epithelial_cells
2.84172682986992	0.643026514661082	5.68005074191054	0.000834896542707028	0.0912951415162129	-0.0529592	Epithelial_cells__CCDC114	CCDC114	Epithelial_cells
2.97661352403895	0.355568922812952	5.67641818142873	0.000837968206441768	0.0912951415162129	-0.0564026	Epithelial_cells__PZP	PZP	Epithelial_cells
-2.31656	-0.305691	-5.66365	0.000848862029113098	0.0912951415162129	-0.068518	Epithelial_cells__CABLES1	CABLES1	Epithelial_cells
2.09079878220081	0.0355353486757214	5.64017809169626	0.000869316142054585	0.0912951415162129	-0.0908674	Epithelial_cells__MARCKSL1	MARCKSL1	Epithelial_cells
3.1267888747082	1.03829168170615	5.63282140125437	0.00087583901164954	0.0912951415162129	-0.0978884	Epithelial_cells__TNS4	TNS4	Epithelial_cells
2.64450429696217	1.29303471628082	5.63280528597355	0.000875853360480848	0.0912951415162129	-0.0979038	Epithelial_cells__TMEM237	TMEM237	Epithelial_cells
-1.9719	-0.915966	-5.62479	0.000883025848247162	0.0912951415162129	-0.105566	Epithelial_cells__MID1IP1	MID1IP1	Epithelial_cells
-2.51874	-0.868306	-5.61923	0.000888035533373116	0.0912951415162129	-0.110883	Epithelial_cells__MMP28	MMP28	Epithelial_cells
2.81256322287671	-0.377436	5.61869664830102	0.000888517192371902	0.0912951415162129	-0.111392	Epithelial_cells__AZIN2	AZIN2	Epithelial_cells
-2.00226	-0.542764	-5.6029	0.000902938288424208	0.0913143919664413	-0.126529	Epithelial_cells__ALDH6A1	ALDH6A1	Epithelial_cells
-2.19643	-0.443819	-5.58415	0.000920405356371802	0.0913143919664413	-0.144555	Epithelial_cells__QDPR	QDPR	Epithelial_cells
-2.00563	-0.247233	-5.57557	0.000928515449742211	0.0913143919664413	-0.152813	Epithelial_cells__TFPI	TFPI	Epithelial_cells
-2.0896	-0.662905	-5.56631	0.000937371036564045	0.0913143919664413	-0.161751	Epithelial_cells__FADS1	FADS1	Epithelial_cells
-1.88351	-0.89886	-5.56471	0.000938904016596674	0.0913143919664413	-0.16329	Epithelial_cells__DBI	DBI	Epithelial_cells
-1.9055	-0.330144	-5.53916	0.000963866668886457	0.0913143919664413	-0.188017	Epithelial_cells__CHPT1	CHPT1	Epithelial_cells
2.49670509611175	0.446303024864706	5.52708136665266	0.000975919435767778	0.0913143919664413	-0.199735	Epithelial_cells__RPGRIP1L	RPGRIP1L	Epithelial_cells
2.60900748618469	0.476997589248427	5.49933425564158	0.00100426028077501	0.0913143919664413	-0.226751	Epithelial_cells__RSPH14	RSPH14	Epithelial_cells
-2.15773	-0.623144	-5.49832	0.00100531198657386	0.0913143919664413	-0.227739	Epithelial_cells__EPDR1	EPDR1	Epithelial_cells
3.12100362956663	0.407734157282225	5.49828838619542	0.00100534640848938	0.0913143919664413	-0.227772	Epithelial_cells__KCNH3	KCNH3	Epithelial_cells
2.2164348111886	-0.0137456	5.49734501364359	0.00100632722217108	0.0913143919664413	-0.228693	Epithelial_cells__FBXO32	FBXO32	Epithelial_cells
-1.9129	-0.435946	-5.46204	0.00104381315852408	0.0913143919664413	-0.263252	Epithelial_cells__GANC	GANC	Epithelial_cells
-2.41281	-1.67267	-5.4477	0.00105948727011652	0.0913143919664413	-0.277349	Epithelial_cells__FBP1	FBP1	Epithelial_cells
2.69600729618465	-0.262772	5.43138470340959	0.00107763681487155	0.0913143919664413	-0.293423	Epithelial_cells__PLB1	PLB1	Epithelial_cells
1.97202213364292	0.0603345376637898	5.41241040330872	0.00109918460890389	0.0913143919664413	-0.312172	Epithelial_cells__AKR1B1	AKR1B1	Epithelial_cells
2.08542988168867	-0.0687463	5.40786769999795	0.00110441468443299	0.0913143919664413	-0.316669	Epithelial_cells__CYBA	CYBA	Epithelial_cells
2.10268010340708	0.356123161499974	5.40703744670958	0.00110537357220786	0.0913143919664413	-0.317491	Epithelial_cells__AK4	AK4	Epithelial_cells
2.21073003470716	0.518238349173685	5.40275961085036	0.00111032897601018	0.0913143919664413	-0.32173	Epithelial_cells__PRSS12	PRSS12	Epithelial_cells
-2.14646	-0.711613	-5.39888	0.00111483996364454	0.0913143919664413	-0.325572	Epithelial_cells__ACSL1	ACSL1	Epithelial_cells
2.1162269893034	0.0523123524401534	5.38584595565082	0.00113016641876183	0.0913143919664413	-0.338517	Epithelial_cells__TESC	TESC	Epithelial_cells
2.97608067762781	0.542911011139263	5.38550189004485	0.00113057405493993	0.0913143919664413	-0.338858	Epithelial_cells__MYADM	MYADM	Epithelial_cells
2.75538641769242	-0.3133	5.38391419102296	0.00113245723345757	0.0913143919664413	-0.340437	Epithelial_cells__BTBD11	BTBD11	Epithelial_cells
3.11578196882637	0.00739915943168388	5.37781058931527	0.00113972948752748	0.0913143919664413	-0.346508	Epithelial_cells__NRG2	NRG2	Epithelial_cells
3.55234608250576	0.667755912200805	5.35957263309735	0.00116177252503323	0.0913143919664413	-0.364684	Epithelial_cells__ORAI2	ORAI2	Epithelial_cells
2.30573384615714	-0.412529	5.34574544220666	0.00117880240572461	0.0913143919664413	-0.3785	Epithelial_cells__VAT1	VAT1	Epithelial_cells
3.55588187758151	-0.382373	5.34367802997878	0.00118137258305091	0.0913143919664413	-0.380568	Epithelial_cells__UCK2	UCK2	Epithelial_cells
-1.98873	-0.517872	-5.33635	0.00119053437762345	0.0913143919664413	-0.387906	Epithelial_cells__RHOBTB2	RHOBTB2	Epithelial_cells
-1.87141	-0.623582	-5.33196	0.0011960539983192	0.0913143919664413	-0.3923	Epithelial_cells__FZD5	FZD5	Epithelial_cells
-2.19457	-0.44885	-5.33189	0.00119614390123523	0.0913143919664413	-0.392372	Epithelial_cells__SLC48A1	SLC48A1	Epithelial_cells
2.23073592472882	0.0810068489050769	5.32197543905624	0.00120873436066855	0.0913143919664413	-0.402322	Epithelial_cells__ECE1	ECE1	Epithelial_cells
-2.26703	-0.662412	-5.32105	0.00120992215668519	0.0913143919664413	-0.403255	Epithelial_cells__TSPAN4	TSPAN4	Epithelial_cells
2.65831440720918	-0.977398	5.31534611753865	0.00121723305715366	0.0913143919664413	-0.408982	Epithelial_cells__GPR137B	GPR137B	Epithelial_cells
-1.90211	-0.632078	-5.31529	0.00121730089518442	0.0913143919664413	-0.409035	Epithelial_cells__PNRC2	PNRC2	Epithelial_cells
-1.8772	-0.781655	-5.31521	0.00121741408454307	0.0913143919664413	-0.409123	Epithelial_cells__TMEM163	TMEM163	Epithelial_cells
-2.26921	-0.323421	-5.31274	0.00122059023089875	0.0913143919664413	-0.411601	Epithelial_cells__CDKL5	CDKL5	Epithelial_cells
-2.12659	0.178199989078872	-5.30834	0.00122629119825697	0.0913143919664413	-0.416031	Epithelial_cells__ANKRD29	ANKRD29	Epithelial_cells
2.4432817725184	0.77273643876451	5.30358419169715	0.00123247656324118	0.0913143919664413	-0.420816	Epithelial_cells__FDXR	FDXR	Epithelial_cells
1.94463683650967	0.307719706657225	5.29747102938252	0.00124048342695693	0.0913143919664413	-0.426976	Epithelial_cells__MFSD6	MFSD6	Epithelial_cells
2.32780328705599	0.02164181917118	5.28378703391616	0.00125861793915933	0.0914896279865987	-0.440785	Epithelial_cells__CCDC3	CCDC3	Epithelial_cells
2.61210961692365	0.740013525160772	5.2719599587739	0.00127453048174316	0.0914896279865987	-0.452745	Epithelial_cells__CNFN	CNFN	Epithelial_cells
2.04819066031483	-0.363764	5.26294382921733	0.00128681211810736	0.0914896279865987	-0.461878	Epithelial_cells__QSOX2	QSOX2	Epithelial_cells
2.01201116218533	0.296515879070756	5.25592073988387	0.00129647049903069	0.0914896279865987	-0.469001	Epithelial_cells__CFH	CFH	Epithelial_cells
2.26599018638185	1.20383964772552	5.24937964344976	0.00130553891513145	0.0914896279865987	-0.475643	Epithelial_cells__PLEKHA4	PLEKHA4	Epithelial_cells
-2.05227	0.0863166121098053	-5.24809	0.00130733401075202	0.0914896279865987	-0.476952	Epithelial_cells__DAPK2	DAPK2	Epithelial_cells
-1.99282	-0.400008	-5.2466	0.00130940908608068	0.0914896279865987	-0.478464	Epithelial_cells__PLEKHM2	PLEKHM2	Epithelial_cells
-2.29527	-2.34298	-5.2308	0.00133168211501648	0.0914896279865987	-0.494543	Epithelial_cells__FTL	FTL	Epithelial_cells
2.29046582583123	-0.339598	5.23010707149101	0.00133267252350558	0.0914896279865987	-0.495252	Epithelial_cells__LRRC26	LRRC26	Epithelial_cells
-2.5089	-0.217361	-5.22804	0.00133561500710363	0.0914896279865987	-0.497355	Epithelial_cells__BLVRB	BLVRB	Epithelial_cells
-1.89797	-0.793228	-5.21348	0.00135658922420612	0.0916854509559469	-0.512218	Epithelial_cells__CHODL	CHODL	Epithelial_cells
-3.06957	-1.48063	-5.21315	0.00135706364959127	0.0916854509559469	-0.512552	Epithelial_cells__ALOX15B	ALOX15B	Epithelial_cells
2.19720283420791	1.17920269247616	5.2024377681641	0.00137273577056967	0.091714666285052	-0.523509	Epithelial_cells__ITGB4	ITGB4	Epithelial_cells
1.89566404011885	0.660573960736275	5.20016092257859	0.00137609191100848	0.091714666285052	-0.52584	Epithelial_cells__TEX9	TEX9	Epithelial_cells
-2.29963	0.326130285635474	-5.18485	0.00139890534346096	0.0917815882496854	-0.54154	Epithelial_cells__TANGO2	TANGO2	Epithelial_cells
-2.13892	-0.489275	-5.18238	0.00140262407725505	0.0917815882496854	-0.544075	Epithelial_cells__PHACTR1	PHACTR1	Epithelial_cells
2.02333671561416	-0.758751	5.17079516336231	0.00142020909257468	0.0917815882496854	-0.555978	Epithelial_cells__PRDM8	PRDM8	Epithelial_cells
-2.59111	-0.4947	-5.17059	0.00142052096704697	0.0917815882496854	-0.556188	Epithelial_cells__PTPN13	PTPN13	Epithelial_cells
-2.29119	-0.866676	-5.16857	0.00142361952577067	0.0917815882496854	-0.55827	Epithelial_cells__FMO5	FMO5	Epithelial_cells
2.48000735242906	0.582256981999441	5.15355085577688	0.00144685034204007	0.092673582947294	-0.573742	Epithelial_cells__CCDC34	CCDC34	Epithelial_cells
-1.77726	-0.126216	-5.1269	0.00148913207815706	0.0947664439931694	-0.601294	Epithelial_cells__TMEM97	TMEM97	Epithelial_cells
3.03411049947125	0.896963067674259	5.11804840297981	0.00150347343003659	0.0949847049741699	-0.610468	Epithelial_cells__IER5L	IER5L	Epithelial_cells
2.16666807368534	0.187313955719939	5.1073829169884	0.00152096362574693	0.0949847049741699	-0.621542	Epithelial_cells__BID	BID	Epithelial_cells
-3.18932	-0.354039	-5.10709	0.00152145005939972	0.0949847049741699	-0.621848	Epithelial_cells__DAPK1	DAPK1	Epithelial_cells
-1.8298	-0.627886	-5.08985	0.00155020404043298	0.0959513878599724	-0.639782	Epithelial_cells__ATAD3C	ATAD3C	Epithelial_cells
4.94302246112773	-0.750586	5.07568842935356	0.00157429280695665	0.0959513878599724	-0.65456	Epithelial_cells__TGFB1	TGFB1	Epithelial_cells
-2.0878	-0.640701	-5.06435	0.00159386998440116	0.0959513878599724	-0.666409	Epithelial_cells__CLIC2	CLIC2	Epithelial_cells
-1.91496	-0.461301	-5.04555	0.00162694056728825	0.0959513878599724	-0.686109	Epithelial_cells__GALE	GALE	Epithelial_cells
3.21713568499294	0.0453622635317826	5.03322599652238	0.00164903731491501	0.0959513878599724	-0.699056	Epithelial_cells__RASA3	RASA3	Epithelial_cells
2.11425258626119	0.0988655283636822	5.03157314944956	0.00165202569288037	0.0959513878599724	-0.700794	Epithelial_cells__CLMN	CLMN	Epithelial_cells
1.73189198115016	0.597146024215954	5.03107392383284	0.00165292948852929	0.0959513878599724	-0.701319	Epithelial_cells__TMC4	TMC4	Epithelial_cells
2.1196139465553	0.639449193399431	5.02883623022533	0.00165698737525403	0.0959513878599724	-0.703673	Epithelial_cells__MX2	MX2	Epithelial_cells
2.54314588266722	0.682161123495714	5.01927260667067	0.0016744558543624	0.0959513878599724	-0.713743	Epithelial_cells__ELK3	ELK3	Epithelial_cells
-2.06477	0.0662471058179633	-5.01901	0.00167494497075676	0.0959513878599724	-0.714024	Epithelial_cells__BMP1	BMP1	Epithelial_cells
3.52988012449701	1.02989756139672	5.01885295701065	0.00167522705416896	0.0959513878599724	-0.714186	Epithelial_cells__PLAU	PLAU	Epithelial_cells
-2.59914	-1.10478	-5.00952	0.00169248988342539	0.0959513878599724	-0.724033	Epithelial_cells__STRADB	STRADB	Epithelial_cells
1.93846562654601	-0.000835858	5.0076967804117	0.00169587485789193	0.0959513878599724	-0.725953	Epithelial_cells__SDK2	SDK2	Epithelial_cells
-1.8931	-0.820018	-5.00473	0.00170141985035945	0.0959513878599724	-0.729089	Epithelial_cells__HOPX	HOPX	Epithelial_cells
1.6874373139831	0.325786563301213	5.00343033159413	0.00170384601911118	0.0959513878599724	-0.730458	Epithelial_cells__SYNGAP1	SYNGAP1	Epithelial_cells
3.37964090523155	0.621395643468246	4.99583722501421	0.00171813597050217	0.0959513878599724	-0.738484	Epithelial_cells__PKIG	PKIG	Epithelial_cells
-2.10327	-0.964922	-4.99561	0.00171857345315893	0.0959513878599724	-0.738729	Epithelial_cells__DGAT2	DGAT2	Epithelial_cells
2.1023765055193	-0.294231	4.98930634560902	0.00173053371594491	0.0959513878599724	-0.745395	Epithelial_cells__SNX9	SNX9	Epithelial_cells
-1.92497	0.325030004348969	-4.98759	0.00173380148999324	0.0959513878599724	-0.747209	Epithelial_cells__SUSD2	SUSD2	Epithelial_cells
2.83471448650555	0.0173582051969505	4.98477255698089	0.00173919893491289	0.0959513878599724	-0.750197	Epithelial_cells__PDZD4	PDZD4	Epithelial_cells
1.96159219513926	0.261433237121787	4.97942771544383	0.00174947641908123	0.0959513878599724	-0.755862	Epithelial_cells__RAMP1	RAMP1	Epithelial_cells
-2.77208	-0.605822	-4.97867	0.00175093773467103	0.0959513878599724	-0.756665	Epithelial_cells__AATK	AATK	Epithelial_cells
-1.72291	0.0818545246643714	-4.95636	0.00179460617399491	0.0965523380096091	-0.780363	Epithelial_cells__BCAT2	BCAT2	Epithelial_cells
2.03787446422593	0.363391225965155	4.95490216844005	0.00179751164312019	0.0965523380096091	-0.78192	Epithelial_cells__COL9A2	COL9A2	Epithelial_cells
2.39703945912321	0.303619470810106	4.95430037952047	0.00179870861515381	0.0965523380096091	-0.78256	Epithelial_cells__RFX3	RFX3	Epithelial_cells
-2.34861	-0.811123	-4.95145	0.00180438858392933	0.0965523380096091	-0.785595	Epithelial_cells__BNIP3L	BNIP3L	Epithelial_cells
-2.08688	-0.808964	-4.94819	0.00181090652616343	0.0965523380096091	-0.789065	Epithelial_cells__TFCP2L1	TFCP2L1	Epithelial_cells
-1.73645	-0.294409	-4.94275	0.00182186094985563	0.0965523380096091	-0.794871	Epithelial_cells__BCKDHB	BCKDHB	Epithelial_cells
2.39787056204816	0.788444090306515	4.93851640131519	0.00183042246632167	0.0965523380096091	-0.799385	Epithelial_cells__RGS12	RGS12	Epithelial_cells
-2.00032	-0.939112	-4.92422	0.00185969057860887	0.0975744035499888	-0.814662	Epithelial_cells__MMAB	MMAB	Epithelial_cells
-2.05097	-0.448619	-4.91429	0.00188031861565186	0.0980146526446686	-0.82529	Epithelial_cells__SPIRE1	SPIRE1	Epithelial_cells
2.88676522818702	0.192307937903991	4.91064501303395	0.00188795458257168	0.0980146526446686	-0.829196	Epithelial_cells__DDIT4	DDIT4	Epithelial_cells
2.05593261184999	0.0643494675771404	4.90486898906584	0.00190012760759027	0.0981301503731433	-0.83539	Epithelial_cells__KLHL5	KLHL5	Epithelial_cells
2.6381267504715	0.14054942444324	4.89300346174259	0.00192540932821503	0.0983641958488489	-0.848132	Epithelial_cells__TMEM51	TMEM51	Epithelial_cells
2.65720009389221	0.670694543653601	4.88530992873386	0.00194200180622365	0.0983641958488489	-0.856407	Epithelial_cells__KIAA1211L	KIAA1211L	Epithelial_cells
2.07455205046047	-0.0500303	4.87687026891413	0.00196038668249889	0.0983641958488489	-0.865495	Epithelial_cells__ITK	ITK	Epithelial_cells
-2.18505	-0.819091	-4.87585	0.0019626314117722	0.0983641958488489	-0.866599	Epithelial_cells__CD302	CD302	Epithelial_cells
3.05074544215394	1.78890451548727	4.87386153952494	0.00196698762945809	0.0983641958488489	-0.868738	Epithelial_cells__PDLIM7	PDLIM7	Epithelial_cells
-1.66641	-0.586597	-4.86992	0.00197566732804771	0.0983641958488489	-0.872987	Epithelial_cells__TIFA	TIFA	Epithelial_cells
-1.71919	-0.893044	-4.86507	0.00198642383434639	0.0983641958488489	-0.878226	Epithelial_cells__LGMN	LGMN	Epithelial_cells
2.05461388592504	-1.36003	4.85965780068602	0.00199848542087289	0.0983641958488489	-0.884069	Epithelial_cells__GARNL3	GARNL3	Epithelial_cells
-3.2366	-1.80287	-4.85595	0.00200680915728563	0.0983641958488489	-0.888081	Epithelial_cells__CISH	CISH	Epithelial_cells
1.71938516160935	0.397975883756965	4.85410158497586	0.00201095906393139	0.0983641958488489	-0.890075	Epithelial_cells__MARCKS	MARCKS	Epithelial_cells
-2.74078	-1.25585	-4.8526	0.00201435194256564	0.0983641958488489	-0.891702	Epithelial_cells__C2	C2	Epithelial_cells
1.94169	0.999219534643178	4.83726091586857	0.00204929830280069	0.0995777263981578	-0.908311	Epithelial_cells__TPM2	TPM2	Epithelial_cells
-2.65078	-0.815154	-4.82948	0.0020672934712437	0.0996707475402179	-0.916756	Epithelial_cells__GPM6A	GPM6A	Epithelial_cells
-1.87779	-1.51056	-4.81213	0.00210803070981346	0.0996707475402179	-0.935613	Epithelial_cells__MPP7	MPP7	Epithelial_cells
-2.81857	-1.22516	-4.81048	0.00211194603049404	0.0996707475402179	-0.937407	Epithelial_cells__ASRGL1	ASRGL1	Epithelial_cells
2.65460374586651	0.32264068832656	4.80819927081423	0.00211738624840333	0.0996707475402179	-0.939894	Epithelial_cells__LRRN1	LRRN1	Epithelial_cells
-1.86191	-0.75577	-4.80775	0.00211845572619754	0.0996707475402179	-0.940382	Epithelial_cells__SNX25	SNX25	Epithelial_cells
-2.44049	-0.8718	-4.8043	0.0021267048534604	0.0996707475402179	-0.944139	Epithelial_cells__PXMP4	PXMP4	Epithelial_cells
-1.63805	-0.196644	-4.80324	0.00212926448300821	0.0996707475402179	-0.945302	Epithelial_cells__MBIP	MBIP	Epithelial_cells
1.69073622473629	0.0238981492266698	4.80016413507086	0.00213665277544463	0.0996707475402179	-0.948651	Epithelial_cells__GOLM1	GOLM1	Epithelial_cells
2.49123215341257	1.65931764697912	4.79227353363983	0.00215576256787621	0.0996707475402179	-0.957262	Epithelial_cells__ISYNA1	ISYNA1	Epithelial_cells
1.70268544778959	0.930429741797468	4.7903270107976	0.00216050590097678	0.0996707475402179	-0.959388	Epithelial_cells__CD24	CD24	Epithelial_cells
2.41275766531986	0.841638546473255	4.77811995051502	0.00219051814163968	0.0996707475402179	-0.972733	Epithelial_cells__FHL2	FHL2	Epithelial_cells
2.10423279046349	-0.317239	4.77439295637356	0.00219977342337311	0.0996707475402179	-0.976813	Epithelial_cells__IRF5	IRF5	Epithelial_cells
1.90406673066396	-0.479988	4.77052809683436	0.00220941698798907	0.0996707475402179	-0.981046	Epithelial_cells__ADM	ADM	Epithelial_cells
-1.9227	-0.679399	-4.75704	0.00224343526470781	0.0996707475402179	-0.995836	Epithelial_cells__HSD17B4	HSD17B4	Epithelial_cells
-1.70081	-0.89735	-4.75303	0.00225367062765478	0.0996707475402179	-1.00024	Epithelial_cells__TCEA3	TCEA3	Epithelial_cells
2.04794163315886	0.0611595901963452	4.75282217390738	0.00225420135447486	0.0996707475402179	-1.00047	Epithelial_cells__PINLYP	PINLYP	Epithelial_cells
3.26652221598414	-0.545974	4.75208882204552	0.00225607788263842	0.0996707475402179	-1.00128	Epithelial_cells__PPIP5K1	PPIP5K1	Epithelial_cells
2.40631791124682	0.190548195023426	4.75063548948018	0.00225980185392418	0.0996707475402179	-1.00287	Epithelial_cells__SLC2A1	SLC2A1	Epithelial_cells
2.00524155273217	-0.0147353	4.74940216317702	0.00226296744519121	0.0996707475402179	-1.00423	Epithelial_cells__PPP2R2B	PPP2R2B	Epithelial_cells
2.53922924655494	-0.646979	4.7484740427791	0.00226535290980004	0.0996707475402179	-1.00525	Epithelial_cells__TRIM14	TRIM14	Epithelial_cells
1.86463342895049	0.55427399267822	4.74794786286348	0.00226670654349992	0.0996707475402179	-1.00583	Epithelial_cells__SYTL1	SYTL1	Epithelial_cells
2.44513307899461	-0.542455	4.74530791081542	0.00227351157710351	0.0996707475402179	-1.00873	Epithelial_cells__TRPV1	TRPV1	Epithelial_cells
-1.6473	-0.36452	-4.73379	0.00230345612524986	0.10053668681179	-1.02141	Epithelial_cells__RILP	RILP	Epithelial_cells
3.49768813672764	-0.273709	4.72908874759186	0.00231582118970833	0.100631102269969	-1.02659	Epithelial_cells__KYNU	KYNU	Epithelial_cells
-1.88158	-0.472501	-4.71973	0.00234064432089309	0.101263664830217	-1.03692	Epithelial_cells__SMIM1	SMIM1	Epithelial_cells
2.22223100437441	0.204900269240967	4.70954971923669	0.00236795650024502	0.10199791667431	-1.04817	Epithelial_cells__TSHZ3	TSHZ3	Epithelial_cells
2.02749084897432	0.425449743241012	4.70143834229892	0.00238998152837345	0.102499033895112	-1.05715	Epithelial_cells__DBN1	DBN1	Epithelial_cells
-2.1832	-0.879435	-4.6869	0.00243004107614822	0.103739557419844	-1.07327	Epithelial_cells__MEGF9	MEGF9	Epithelial_cells
1.90829371611267	-0.189905	4.67609255488258	0.00246028250348106	0.103739557419844	-1.08527	Epithelial_cells__ANPEP	ANPEP	Epithelial_cells
2.02950597667916	-0.246111	4.66994461147673	0.00247767879399487	0.103739557419844	-1.09211	Epithelial_cells__C12ORF45	C12ORF45	Epithelial_cells
2.2507703802646	0.304665489841333	4.66865836974047	0.00248133559967903	0.103739557419844	-1.09354	Epithelial_cells__VAV1	VAV1	Epithelial_cells
2.41005287088315	-0.151468	4.66522542117603	0.00249112488523895	0.103739557419844	-1.09736	Epithelial_cells__MDK	MDK	Epithelial_cells
-2.39808	-0.846251	-4.65918	0.00250848175030054	0.103739557419844	-1.1041	Epithelial_cells__TTN	TTN	Epithelial_cells
-1.67749	0.109858321012737	-4.65861	0.00251010199046535	0.103739557419844	-1.10472	Epithelial_cells__KLHL20	KLHL20	Epithelial_cells
2.40112225506763	-0.246433	4.65501254870649	0.00252050188040829	0.103739557419844	-1.10874	Epithelial_cells__LRRIQ3	LRRIQ3	Epithelial_cells
2.28902692557338	-0.0885142	4.64972396374399	0.00253586522865164	0.103739557419844	-1.11464	Epithelial_cells__SLC1A4	SLC1A4	Epithelial_cells
1.6654247199483	0.47866857185324	4.64937978590061	0.00253686866067557	0.103739557419844	-1.11502	Epithelial_cells__PLEC	PLEC	Epithelial_cells
-1.79229	0.202847764834767	-4.64722	0.00254316440387488	0.103739557419844	-1.11743	Epithelial_cells__SUOX	SUOX	Epithelial_cells
1.86899632050568	-0.406032	4.6465584304771	0.00254511079639114	0.103739557419844	-1.11817	Epithelial_cells__SLC27A2	SLC27A2	Epithelial_cells
-1.80735	-0.356771	-4.62198	0.00261817834614507	0.104457966332549	-1.14567	Epithelial_cells__DLC1	DLC1	Epithelial_cells
2.49158321791986	0.738517863737901	4.61998898318874	0.00262420302626471	0.104457966332549	-1.1479	Epithelial_cells__ZNF668	ZNF668	Epithelial_cells
-2.44429	-0.389627	-4.61909	0.00262693992467937	0.104457966332549	-1.14892	Epithelial_cells__PTPDC1	PTPDC1	Epithelial_cells
-1.7579	0.076668722330405	-4.60476	0.00267077735198276	0.104457966332549	-1.16501	Epithelial_cells__GLCCI1	GLCCI1	Epithelial_cells
-2.59191	-1.12734	-4.60044	0.00268414298896054	0.104457966332549	-1.16986	Epithelial_cells__CCDC141	CCDC141	Epithelial_cells
1.89138426966447	0.535525637134294	4.60034313837143	0.00268443810626439	0.104457966332549	-1.16997	Epithelial_cells__SLC22A18	SLC22A18	Epithelial_cells
-4.1071	-1.6293	-4.59359	0.00270550627436902	0.104457966332549	-1.17757	Epithelial_cells__MARC1	MARC1	Epithelial_cells
-1.61814	-0.328898	-4.59189	0.00271084168768202	0.104457966332549	-1.17948	Epithelial_cells__GUCD1	GUCD1	Epithelial_cells
1.68276281802044	0.727573718750047	4.58835667230546	0.00272194128874784	0.104457966332549	-1.18346	Epithelial_cells__SEMA3C	SEMA3C	Epithelial_cells
-1.57292	-0.335509	-4.5871	0.00272592150965859	0.104457966332549	-1.18488	Epithelial_cells__SCARF1	SCARF1	Epithelial_cells
1.74150447234998	0.448093345821535	4.5869805420641	0.00272628395590647	0.104457966332549	-1.18501	Epithelial_cells__TSPAN6	TSPAN6	Epithelial_cells
2.65116703221344	0.318192905373644	4.58672930960405	0.00272707760128412	0.104457966332549	-1.18529	Epithelial_cells__IQCD	IQCD	Epithelial_cells
1.60664698279718	-0.110138	4.58667548589333	0.00272724766413067	0.104457966332549	-1.18535	Epithelial_cells__ATAT1	ATAT1	Epithelial_cells
1.68068708244927	0.0181399446869952	4.58500974411738	0.0027325166026887	0.104457966332549	-1.18723	Epithelial_cells__IFT52	IFT52	Epithelial_cells
-1.70148	-0.84668	-4.58278	0.00273960063562516	0.104457966332549	-1.18975	Epithelial_cells__MSMO1	MSMO1	Epithelial_cells
2.25525493180978	-0.0364578	4.58223788667875	0.00274130934388676	0.104457966332549	-1.19036	Epithelial_cells__UNC5B	UNC5B	Epithelial_cells
1.61311046842334	-0.0248631	4.57951688939176	0.00274997126158722	0.104457966332549	-1.19342	Epithelial_cells__TNFRSF10C	TNFRSF10C	Epithelial_cells
-2.70346	-1.38978	-4.5759	0.00276154	0.104457966332549	-1.19751	Epithelial_cells__CMPK2	CMPK2	Epithelial_cells
1.82364098972986	-0.0862332	4.57514800064765	0.00276394253982109	0.104457966332549	-1.19835	Epithelial_cells__NEGR1	NEGR1	Epithelial_cells
-2.01201	-0.301707	-4.56642	0.0027920784948496	0.105118558294643	-1.20821	Epithelial_cells__TBC1D4	TBC1D4	Epithelial_cells
-1.95725	-0.173871	-4.55452	0.00283098626156087	0.106178131118009	-1.22168	Epithelial_cells__HIRIP3	HIRIP3	Epithelial_cells
2.56172349895501	-0.321617	4.54899331399679	0.00284924560120068	0.106458176553953	-1.22794	Epithelial_cells__SLC6A8	SLC6A8	Epithelial_cells
2.40454134806006	0.234225903731803	4.54446107977964	0.00286432188575474	0.106617626721075	-1.23308	Epithelial_cells__CCDC157	CCDC157	Epithelial_cells
-2.26367	-1.11512	-4.53957	0.0028806842389222	0.106645576241886	-1.23863	Epithelial_cells__EBP	EBP	Epithelial_cells
2.43149452185872	1.11591602375683	4.53778346891079	0.00288669595058633	0.106645576241886	-1.24066	Epithelial_cells__INPP5D	INPP5D	Epithelial_cells
-1.91596	-1.08616	-4.53082	0.00291023469457842	0.107114011295976	-1.24857	Epithelial_cells__AARS	AARS	Epithelial_cells
-2.37524	-0.830495	-4.52705	0.00292307024178855	0.107186486486997	-1.25285	Epithelial_cells__SLCO4C1	SLCO4C1	Epithelial_cells
-1.55946	-0.328025	-4.51782	0.00295475539520395	0.107835222779008	-1.26336	Epithelial_cells__PPP2R5A	PPP2R5A	Epithelial_cells
2.2225892193849	0.122149701645641	4.51220983479438	0.0029741911082005	0.107835222779008	-1.26975	Epithelial_cells__ST8SIA1	ST8SIA1	Epithelial_cells
-1.66014	0.21395645667953	-4.50878	0.00298615530865934	0.107835222779008	-1.27366	Epithelial_cells__CTH	CTH	Epithelial_cells
2.77566829278243	-0.0448927	4.50685166315946	0.00299289278171514	0.107835222779008	-1.27586	Epithelial_cells__RAB6B	RAB6B	Epithelial_cells
1.58297482475455	0.168065119965717	4.49726766023374	0.0030266694986822	0.107835222779008	-1.2868	Epithelial_cells__ZNF703	ZNF703	Epithelial_cells
-1.80687	-0.189844	-4.49624	0.00303033334447088	0.107835222779008	-1.28798	Epithelial_cells__C19ORF54	C19ORF54	Epithelial_cells
-2.04457	-0.179626	-4.49439	0.00303688623247387	0.107835222779008	-1.29008	Epithelial_cells__RASSF7	RASSF7	Epithelial_cells
1.92372872983569	-0.11019	4.48482536831767	0.00307115077763307	0.107835222779008	-1.30102	Epithelial_cells__LXN	LXN	Epithelial_cells
-1.54044	0.0757171557955086	-4.4847	0.00307161758536907	0.107835222779008	-1.30117	Epithelial_cells__ARRB1	ARRB1	Epithelial_cells
1.73081641922781	0.308663779071304	4.48132578984787	0.00308379182517049	0.107835222779008	-1.30503	Epithelial_cells__CLU	CLU	Epithelial_cells
1.56252576111441	0.573063964745564	4.48117286884544	0.00308434551241702	0.107835222779008	-1.3052	Epithelial_cells__KCTD1	KCTD1	Epithelial_cells
-1.76288	-0.79357	-4.47927	0.00309124105457529	0.107835222779008	-1.30738	Epithelial_cells__MAPK9	MAPK9	Epithelial_cells
1.93569130353167	0.346640890575961	4.47667162530753	0.00310069273296309	0.107835222779008	-1.31036	Epithelial_cells__ZBTB33	ZBTB33	Epithelial_cells
2.05966582643932	0.241431012720073	4.47656717406895	0.00310107320640206	0.107835222779008	-1.31048	Epithelial_cells__WDR78	WDR78	Epithelial_cells
-1.65366	-0.275866	-4.47097	0.00312153111733927	0.107835222779008	-1.31689	Epithelial_cells__PIGA	PIGA	Epithelial_cells
2.39198	0.698446135784678	4.46717129468657	0.00313551087437395	0.107835222779008	-1.32125	Epithelial_cells__SGCB	SGCB	Epithelial_cells
1.58176771504039	0.318633255719448	4.46363217142763	0.0031485919725879	0.107835222779008	-1.32531	Epithelial_cells__SGPL1	SGPL1	Epithelial_cells
-1.5093	-0.338863	-4.45954	0.00316378981970176	0.107835222779008	-1.33001	Epithelial_cells__ETV5	ETV5	Epithelial_cells
-2.43354	-1.59456	-4.44646	0.00321290926263526	0.107835222779008	-1.34505	Epithelial_cells__CD36	CD36	Epithelial_cells
1.81553585409197	0.519409777379567	4.44619874714687	0.0032139158824372	0.107835222779008	-1.34536	Epithelial_cells__MDM1	MDM1	Epithelial_cells
2.27467079215089	0.264441524932153	4.44283321966114	0.00322669855814427	0.107835222779008	-1.34923	Epithelial_cells__INPP4B	INPP4B	Epithelial_cells
1.75256163112668	0.487716547657534	4.43973435973074	0.00323851814191658	0.107835222779008	-1.3528	Epithelial_cells__MICALL2	MICALL2	Epithelial_cells
-2.13297	-1.2712	-4.43428	0.00325945504438683	0.107835222779008	-1.35909	Epithelial_cells__STX10	STX10	Epithelial_cells
1.55673977283895	0.536659242874903	4.43270597513551	0.00326550348337109	0.107835222779008	-1.3609	Epithelial_cells__CES1	CES1	Epithelial_cells
1.67805192182671	0.14392406648184	4.42788094875578	0.00328417301419883	0.107835222779008	-1.36647	Epithelial_cells__EFHD1	EFHD1	Epithelial_cells
-1.83477	-0.56856	-4.42674	0.00328860185645824	0.107835222779008	-1.36779	Epithelial_cells__LAMP3	LAMP3	Epithelial_cells
2.4472142510708	1.06873896191547	4.4244758103655	0.00329741959630794	0.107835222779008	-1.3704	Epithelial_cells__CDKN2A	CDKN2A	Epithelial_cells
-1.89849	-0.819873	-4.42434	0.00329795116176457	0.107835222779008	-1.37056	Epithelial_cells__GOLT1A	GOLT1A	Epithelial_cells
2.40510046837515	0.229132584876892	4.42312386665138	0.00330269526978634	0.107835222779008	-1.37196	Epithelial_cells__TXLNB	TXLNB	Epithelial_cells
-1.80503	-0.753131	-4.41807	0.00332248578701723	0.107835222779008	-1.3778	Epithelial_cells__KIAA1324L	KIAA1324L	Epithelial_cells
-3.23614	-1.11962	-4.41515	0.0033340173111264	0.107835222779008	-1.38118	Epithelial_cells__AFF3	AFF3	Epithelial_cells
-1.9028	-0.503279	-4.41508	0.00333427878265671	0.107835222779008	-1.38126	Epithelial_cells__DRAM1	DRAM1	Epithelial_cells
2.44557015767717	0.13550619169095	4.41455905125727	0.00333633528994926	0.107835222779008	-1.38186	Epithelial_cells__SIPA1L2	SIPA1L2	Epithelial_cells
-1.96159	-0.890844	-4.41397	0.00333864458882995	0.107835222779008	-1.38254	Epithelial_cells__TMEM170B	TMEM170B	Epithelial_cells
[truncated: 9,561 more rows]
