# Supplementary material
Source: Research Square preprint supplement (doi:10.21203/rs.3.rs-9392286/v1)
Supplement: Supplementary file 8 [file 5468466bae5a331bd3544f63.xlsx]

## Sheet: Table S18(Hallmark_GSEA_Bcells)
Table S18: Hallmark GSEA of B Cell in response to Exposure A (train set)
pathway	pval	padj	log2err	ES	NES	size	leadingEdge	leadingEdgeSize	overlap_exposureA_leadingEdge	overlap_frac	neglog10FDR	Direction
HALLMARK_TNFA_SIGNALING_VIA_NFKB	0.000372160117943826	0.00818752259476417	0.49849310876659	0.674830569641598	1.92755838179873	20	CD44|KLF6|FOS|ZFP36|CFLAR|BTG2|SQSTM1|DUSP1|SAT1|MCL1|CCNL1|JUN	12	8	0.666666666666667	2.08684748849416	Up (positive NES)
HALLMARK_IL2_STAT5_SIGNALING	0.00103802225248536	0.011418244777339	0.45505986738723	0.694262387730491	1.8626728171371	15	CD44|IRF8|HUWE1|MAPKAPK2|AHNAK|KLF6	6	3	0.5	1.9424006510904	Up (positive NES)
HALLMARK_KRAS_SIGNALING_UP	0.0486322188449848	0.321107784431138	0.252961123069611	0.514376736967529	1.43532454328844	18	IRF8|DOCK2|CTSS|CXCR4|PECAM1|CD37	6	2	0.333333333333333	0.493349165954803	Up (positive NES)
HALLMARK_APOPTOSIS	0.0583832335329341	0.321107784431138	0.227987202850442	0.494287214679482	1.41186174209238	20	CD44|DAP|NEDD9|CFLAR|BTG2|SQSTM1|PDCD4|SAT1|MCL1|JUN	10	7	0.7	0.493349165954803	Up (positive NES)
HALLMARK_ESTROGEN_RESPONSE_LATE	0.0791925465838509	0.348447204968944	0.197822021315103	0.56453285967666	1.42488159156075	12	CD44|SLC7A5|FOS|ZFP36|PDCD4|XBP1	6	5	0.833333333333333	0.457863014775688	Up (positive NES)
HALLMARK_ANDROGEN_RESPONSE	0.138643067846608	0.508357915437562	0.206587922696891	-0.427768	-1.30954	16	CDK6|UBE2J1|PTK2B	3	1	0.333333333333333	0.293830409828802	Down (negative NES)
HALLMARK_UV_RESPONSE_DN	0.202127659574468	0.520476423560124	0.116739204791222	0.441847087773001	1.23293672493814	18	CDK13|YTHDC1|NR3C1|TGFBR2	4	2	0.5	0.283598938294929	Up (positive NES)
HALLMARK_PROTEIN_SECRETION	0.194690265486726	0.520476423560124	0.172324344900946	-0.398755	-1.22072	16	USO1|CLTC|COPB1|STX16|ADAM10|STX7|ARFGEF1|TPD52	8	1	0.125	0.283598938294929	Down (negative NES)
HALLMARK_ALLOGRAFT_REJECTION	0.212922173274596	0.520476423560124	0.11101149245045	0.416399236526683	1.21039465463285	21	IRF8|CD74|EIF4G3|CTSS	4	2	0.5	0.283598938294929	Up (positive NES)
HALLMARK_P53_PATHWAY	0.289877300613497	0.637730061349693	0.0946646223153342	0.437677595095655	1.15118651074319	14	MDM2|FOS|BTG2|ZFP36L1|SAT1|JUN	6	4	0.666666666666667	0.19536311073647	Up (positive NES)
HALLMARK_INTERFERON_ALPHA_RESPONSE	0.325769854132901	0.651539708265802	0.0911073131586733	0.470693572424128	1.13025896969248	10	CD74|CD47|ADAR|PARP14|SP110	5	2	0.4	0.186059110948772	Up (positive NES)
HALLMARK_INTERFERON_GAMMA_RESPONSE	0.391549295774648	0.717840375586854	0.0736212741014394	0.340930645590256	1.05381831815664	27	IRF8|CD74|IFNAR2|PTPN2|TAPBP|ARID5B|ADAR|PARP14|SP110|CIITA|PTPN1|STAT3|NCOA3|B2M|BANK1	15	5	0.333333333333333	0.143972118026418	Up (positive NES)
HALLMARK_MTORC1_SIGNALING	0.443768996960486	0.750362844702467	0.0711327399327894	0.368491877352722	1.02824524819089	18	SLC7A5|CXCR4|BTG2|SQSTM1|XBP1|PDK1	6	5	0.833333333333333	0.124728678813683	Up (positive NES)
HALLMARK_HYPOXIA	0.477503628447025	0.750362844702467	0.0652353056017703	0.336412184148011	1.00402135914583	24	CXCR4|KLF6|NR3C1|FOS|ZFP36|MYH9|DUSP1|PDK1|JUN	9	6	0.666666666666667	0.124728678813683	Up (positive NES)
HALLMARK_MITOTIC_SPINDLE	0.678224687933426	0.886616541353383	0.0466948041282054	0.275781293486013	0.863606784782361	28	DOCK2|NEDD9|RICTOR|AKAP13|MYH9|CCDC88A|TRIO	7	0	0	0.0522641704521096	Up (positive NES)
HALLMARK_APICAL_JUNCTION	0.672727272727273	0.886616541353383	0.077274697304471	-0.309745	-0.827686	10	RASA1	1	0	0	0.0522641704521096	Down (negative NES)
HALLMARK_G2M_CHECKPOINT	0.756838905775076	0.886616541353383	0.0458620343117985	0.288391974545138	0.804733280887434	18	SLC7A5|YTHDC1|CUL3	3	2	0.666666666666667	0.0522641704521096	Up (positive NES)
HALLMARK_HEME_METABOLISM	0.744807121661721	0.886616541353383	0.0789209638180035	-0.256045	-0.801785	17	FOXO3|EPB41|PICALM	3	1	0.333333333333333	0.0522641704521096	Down (negative NES)
HALLMARK_PI3K_AKT_MTOR_SIGNALING	0.765714285714286	0.886616541353383	0.0755015292281669	-0.26881	-0.779621	14	CLTC|HSP90B1|RPTOR|ITPR2	4	3	0.75	0.0522641704521096	Down (negative NES)
HALLMARK_UV_RESPONSE_UP	0.860615883306321	0.946677471636953	0.0429311093452583	0.283332943784066	0.680356860349808	10	FOS|BTG2|SQSTM1	3	2	0.666666666666667	0.0237979577935476	Up (positive NES)
HALLMARK_UNFOLDED_PROTEIN_RESPONSE	0.948717948717949	0.980551053484603	0.035090109926935	0.210997919248846	0.596293019264287	19	SLC7A5	1	1	1	0.00852978938077279	Up (positive NES)
HALLMARK_MYC_TARGETS_V1	0.980551053484603	0.980551053484603	0.0369160593316849	0.209431232678038	0.502899429981617	10	FAM120A|TRA2B	2	1	0.5	0.00852978938077279	Up (positive NES)

## Sheet: TableS18(Hallmark_GSEA_Encells)
Table S18: Hallmark GSEA of Endothelial Cell in response to Exposure A (train set).
pathway	pval	padj	log2err	ES	NES	size	leadingEdge	leadingEdgeSize	overlap_exposureA_leadingEdge	overlap_frac	neglog10FDR	Direction
HALLMARK_MYC_TARGETS_V1	4.7065565205923e-13	2.35327826029615e-11	0.921426003494898	0.554716960342872	2.42040599054902	155	HNRNPC|SERBP1|HSPD1|APEX1|RSL1D1|EIF2S2|PRDX4|GNL3|PABPC4|EIF3J|DDX21|IMPDH2|HNRNPD|PRPS2|FBL|NOP16|SNRPD1|PPIA|PRPF31|LSM7|CCT2|CBX3|EEF1B2|PSMD14|POLD2|NME1|EIF3D|HSP90AB1|RNPS1|VDAC1|CCT4|TUFM|PHB2|SNRPD2|GSPT1|SMARCC1|HSPE1|NHP2|CLNS1A|NOLC1|HDGF|KPNA2|EIF3B|DEK|NCBP2|TXNL4A|NOP56|TRIM28|PA2G4|ILF2|SYNCRIP|SET|HNRNPA2B1|ODC1|CDK4|PPM1G|CCT3|DUT|C1QBP|CTPS1|ABCE1|STARD7|HPRT1|AP3S1|RRP9|BUB3|S…	81	34	0.419753086419753	10.6283267172072	Up (positive NES)
HALLMARK_MYC_TARGETS_V2	4.74266894019971e-09	1.18566723504993e-07	0.761460801445585	0.684990083311723	2.46251627956585	47	HSPD1|EXOSC5|GNL3|BYSL|GRWD1|WDR74|TFB2M|NOP16|RRP12|DCTPP1|FARSA|CBX3|WDR43|HSPE1|IMP4|NOLC1|NIP7|NOP56|PA2G4|TBRG4|NOP2|CDK4|MRTO4|IPO4|PUS1|PES1|RRP9	27	5	0.185185185185185	6.92603718134244	Up (positive NES)
HALLMARK_INTERFERON_ALPHA_RESPONSE	2.09701927916208e-07	3.49503213193681e-06	0.690132458796796	-0.530254	-2.19347	80	CMPK2|EIF2AK2|TXNIP|PARP14|IL4R|HERC6|RTP4|RSAD2|SAMD9|GBP4|PSMA3|HELZ2|IFIT3|IFIT2|IRF2|IRF1|IFI27|PARP9|CSF1|USP18|UBA7|MX1|LAP3|IL7|LY6E|IFI35|TMEM140|PARP12|CCRL2|DDX60|EPSTI1|OGFR|TAP1|CASP1|SAMD9L|PSMB9|IFIH1|TRIM21	38	8	0.210526315789474	5.45654882716903	Down (negative NES)
HALLMARK_MTORC1_SIGNALING	7.24786016317252e-05	0.000905982520396565	0.538434096309916	0.408526837516347	1.77715491952635	148	HSPD1|PNP|INSIG1|EIF2S2|GPI|PDK1|CTSC|SLC6A6|G6PD|ARPC5L|TFRC|BHLHE40|SLC2A1|AK4|LTA4H|PPIA|TES|ENO1|HSPA9|SERPINH1|MTHFD2|PSMD14|SQLE|PSMG1|PGM1|HSPE1|PNO1|CYB5B|SHMT2|MAP2K3|CD9|ATP2A2|SEC11A|EGLN3|STIP1|NUFIP1|DDIT4|GLA|HPRT1|RRP9|SLC1A5|DHCR7|CCT6A|FADS1|PSME3|TOMM40|DDX39A|NMT1|ETF1|ERO1A|NFIL3|XBP1|UNG|PSMC4|UFM1|EDEM1|PSMB5|SERP1|HSPA4|LGMN|P4HA1|ACACA|ABCF2|EBP|MTHFD2L|DHCR24|HSPA5|ACLY|S…	70	34	0.485714285714286	3.04288018131717	Up (positive NES)
HALLMARK_INTERFERON_GAMMA_RESPONSE	0.000146788647179826	0.00146788647179826	0.518848077743792	-0.371693	-1.68498	147	APOL6|CD274|NCOA3|CMPK2|TNFSF10|FAS|EIF2AK2|TXNIP|PARP14|IFIT1|IL4R|HERC6|RTP4|IL6|RSAD2|IL15RA|GBP4|PSMA3|VAMP5|HELZ2|IFIT3|AUTS2|IFIT2|IRF2|VAMP8|IRF1|BPGM|IFI27|JAK2|SPPL2A|USP18|MX1|CASP7|LAP3|IL7|LY6E|RAPGEF6|IFI35|PARP12|DDX60|EPSTI1|OGFR|TAP1|CD69|CASP1|SAMD9L|PSMB10|PSMB9|IFIH1|TRIM21	50	14	0.28	2.83330753200724	Down (negative NES)
HALLMARK_G2M_CHECKPOINT	0.00121249546687967	0.0101041288906639	0.45505986738723	0.39460479013097	1.65154668541008	116	UCK2|HIF1A|CKS1B|STMN1|TGFB1|HNRNPD|SNRPD1|AMD1|SMAD3|DKC1|KIF22|SQLE|HMGB3|HSPA8|GSPT1|SMARCC1|SLC7A1|DBF4|E2F3|ABL1|LMNB1|NOLC1|PAFAH1B1|KPNA2|ILF3|POLE|SYNCRIP|NCL|ODC1|CDK4|NUP98|SFPQ|CKS2|FANCC|BUB3|TLE3|HMGA1|NASP|DDX39A	39	15	0.384615384615385	1.9955	Up (positive NES)
HALLMARK_EPITHELIAL_MESENCHYMAL_TRANSITION	0.00210456630672113	0.0150326164765795	0.431707695803346	0.394171843039525	1.60912593367939	97	COL1A1|BMP1|LAMC1|FBLN2|THBS1|GADD45A|TGFB1|LOXL2|MATN2|MMP14|COLGALT1|VIM|SERPINH1|COL6A3|SAT1|GEM|HTRA1|MYL9|NT5E|ITGA2|FN1|TGFBI|CALU|FLNA|COL6A2|TIMP1|SGCB	27	9	0.333333333333333	1.82296542244406	Up (positive NES)
HALLMARK_E2F_TARGETS	0.00722145720660624	0.045134107541289	0.407017918923954	0.355821905162817	1.50075558929833	120	PRDX4|SLBP|CKS1B|STMN1|HNRNPD|TFRC|PAICS|KIF22|DCTPP1|MTHFD2|HMGB3|POLD2|NME1|GSPT1|PNN|LYAR|LMNB1|NOLC1|TP53|KPNA2|ILF3|SNRPB|POLE|DEK|NOP56|PA2G4|SYNCRIP|RFC3|TBRG4|CDK4|DUT|CTPS1|PRPS1|NAA38|CKS2|HMGA1|PMS2|NASP|DNMT1|DDX39A	40	17	0.425	1.34549514063584	Up (positive NES)
HALLMARK_IL6_JAK_STAT3_SIGNALING	0.0137161305540993	0.0762007253005518	0.380730400722792	-0.399991	-1.53166	54	IFNGR1|CD36|IL18R1|FAS|IL4R|IL6|IL15RA|IL13RA1|CXCL1|IRF1|CD14|CSF1|ACVRL1	13	5	0.384615384615385	1.11804089490019	Down (negative NES)
HALLMARK_APICAL_JUNCTION	0.015445893227286	0.0772294661364301	0.380730400722792	0.356150284053721	1.47722876384122	108	INSIG1|BMP1|CNN2|ACTN1|MDK|ACTG1|NLGN2|EVL|SHC1|FSCN1|ADAM23|MPZL2|CLDN7|ARPC2|CLDN15|GAMT|MYL9|SYMPK|MPZL1|ITGA2|MYH10|ZYX|PBX2|TGFBI|PFN1|VASP	26	4	0.153846153846154	1.11221696729556	Up (positive NES)
HALLMARK_GLYCOLYSIS	0.0174882816084093	0.079492189129133	0.352487857583619	0.350736331322144	1.46876235012703	117	PYGL|PKM|STMN1|SLC16A3|G6PD|ECD|TPBG|FKBP4|AK4|PPIA|ENO1|HDLBP|AKR1A1|FAM162A|IER3|NT5E|PFKP|PMM2|HOMER1|NSDHL|TGFBI|GALE|EGLN3|PGAM1|PGM2|B4GALT2|MDH1|AGRN|DDIT4|CITED2|PRPS1|CLN6|MDH2|SRD5A3|NASP|B3GALT6|EXT1|ERO1A|POLR3K|B3GAT3|PSMC4	41	15	0.365853658536585	1.09967554285007	Up (positive NES)
HALLMARK_UV_RESPONSE_UP	0.0202619955948276	0.0844249816451149	0.352487857583619	0.340051928493239	1.41476330837826	110	OLFM1|PPIF|PPAT|AQP3|DDX21|BID|DGAT1|TFRC|AMD1|HMOX1|FKBP4|MMP14|DLG4|ABCB1|GRPEL1|POLR2H|SIGMAR1|WIZ|BCL2L11|FOSB|CYB5B|PRKACA|STIP1|AP2S1|CEBPG|HSPA2|DNAJA1|CDC34|NXF1|IGFBP2|MARK2	31	14	0.451612903225806	1.07352902511276	Up (positive NES)
HALLMARK_INFLAMMATORY_RESPONSE	0.0240179358612471	0.0857783423615967	0.352487857583619	-0.335031	-1.4267	98	RNF144B|TLR3|CD82|IL7R|IL18R1|TNFSF10|EIF2AK2|IL4R|RTP4|CXCL8|IL6|SLC31A2|IL15RA|SLC11A2|IRF1|CD14|GNAI3|CSF1|PSEN1|P2RX7|CHST2|LY6E	22	8	0.363636363636364	1.06662235061464	Down (negative NES)
HALLMARK_HYPOXIA	0.0223536680849527	0.0857783423615967	0.352487857583619	0.327519480571069	1.38867498755884	126	GPI|PDK1|NDRG1|SLC6A6|BHLHE40|TPBG|TGFB3|HMOX1|SLC2A1|AK4|TES|ENO1|PFKFB3|GRHPR|ETS1|ANXA2|HDLBP|PGM1|FAM162A|IER3|PFKP|TIPARP|LXN|TGFBI|PRDX5|RORA|NDST1|PGM2|CP|DDIT4|BCL2|CITED2|PLIN2|PLAUR	34	15	0.441176470588235	1.06662235061464	Up (positive NES)
HALLMARK_XENOBIOTIC_METABOLISM	0.028279464711432	0.0942648823714401	0.352487857583619	-0.303811	-1.33	113	PDK4|ALDH2|PAPSS2|CD36|FAS|LCAT|CBR1|AKR1C3|CA2|ABHD6|SLC12A4|ADH5|ALDH9A1|BCAT1|CYB5A|ID2|ENTPD5|CROT|NDRG2|GABARAPL1|CAT|SAR1B	22	11	0.5	1.02565007007116	Down (negative NES)
HALLMARK_P53_PATHWAY	0.0352754551169416	0.10375133857924	0.321775918075361	0.321634452203424	1.3907618503718	142	LDHB|CCND2|TRAF4|GADD45A|NDRG1|PITPNC1|JAG2|TGFB1|ADA|RNF19B|HMOX1|DGKA|CD81|PRMT2|RALGDS|TPD52L1|SAT1|FAM162A|IER3|UPP1|TP53|MXD1|RGS16|HBEGF|TSPYL2|PHLDA3|AEN|PLXNB2|DDB2|BAX|SEC61A1|EPS8L2|DDIT4|SPHK1|TRIAP1|ZMAT3|IP6K2|FBXW7|F2R|PROCR|PTPRE	41	10	0.24390243902439	0.984006291398256	Up (positive NES)
HALLMARK_HEME_METABOLISM	0.0334798871328979	0.10375133857924	0.321775918075361	-0.299053	-1.33715	132	ARL2BP|NEK7|MKRN1|DAAM1|TMEM9B|KDM7A|FBXO7|ADD1|CA2|SEC14L1|DCAF10|CTNS|TAL1|SLC11A2|GAPVD1|NR3C1|SYNJ1|LAMP2|BPGM|HAGH|CCND3|CCDC28A|CAT|KAT2B|CLCN3|KHNYN|ALAD|TRAK2|OPTN|SLC25A38|HTATIP2|MGST3|CIR1|EZH1|TSPAN5|ATG4A|MARK3|MBOAT2|USP15	39	11	0.282051282051282	0.984006291398256	Down (negative NES)
HALLMARK_COAGULATION	0.0497335701598579	0.12998266897747	0.271288554688953	0.36071658300728	1.36067210793223	62	DUSP14|CTSB|BMP1|THBS1|MMP14|LTA4H|HTRA1|ITGA2|FN1|C3|TIMP1|CD9|CFH|CRIP2|USP11|DUSP6|CSRP1	17	11	0.647058823529412	0.886114549764032	Up (positive NES)
HALLMARK_DNA_REPAIR	0.0495867768595041	0.12998266897747	0.261663521711573	0.311254829033369	1.31692696984729	121	PNP|IMPDH2|ADA|CDA|APRT|NELFCD|POLR1C|NME4|SF3A3|POLR1D|NME1|NELFE|POLR2H|ALYREF|SUPT5H|TP53|NCBP2|POLR2A|RFC3|POLB|TAF10|USP11|POLR3C|POLD4|DDB2|SEC61A1|DUT|DDB1|HCLS1|HPRT1|ERCC2|ERCC1|EDF1|NUDT21|VPS28|UMPS|CETN2|SAC3D1|ELL|NME3|RPA3|NT5C3A|POM121|POLR2E|GPX4|BCAP31|RFC4|GTF2F1|CANT1|POLR2D	50	16	0.32	0.886114549764032	Up (positive NES)
HALLMARK_ESTROGEN_RESPONSE_EARLY	0.0519930675909879	0.12998266897747	0.261663521711573	0.32001385611708	1.31420677673338	104	OLFM1|PPIF|SYBU|AQP3|KRT8|BHLHE40|KRT18|MYOF|CELSR1|RRP12|TPBG|FHL2|FKBP4|SLC2A1|SVIL|EGR3|TPD52L1|NXT1|CLDN7|UGCG|TIPARP|FLNB|NAV2|CLIC3|MAST4|BCL2|GLA|MUC1|ISG20L2|DHCR7	30	9	0.3	0.886114549764032	Up (positive NES)
HALLMARK_ANDROGEN_RESPONSE	0.107394366197183	0.255700871898055	0.179782316298324	0.321305369582558	1.24864160380089	74	ARID5B|INSIG1|PTK2B|ACTN1|NDRG1|ANKH|KRT8|RRP12|RAB4A|SAT1|SLC38A2|SEC24D|UAP1|PA2G4|ADAMTS1|INPP4B|VAPA|PDLIM5	18	5	0.277777777777778	0.592267791098152	Up (positive NES)
HALLMARK_KRAS_SIGNALING_DN	0.15948275862069	0.318965517241379	0.161978948883402	-0.37109	-1.25437	33	SGK1|RSAD2|VPS50|CPEB3|THRB|MX1|ZBTB16|CHST2|ASB7|MTHFR|SKIL|BARD1|MFSD6|YPEL1	14	2	0.142857142857143	0.496256265159923	Down (negative NES)
HALLMARK_UNFOLDED_PROTEIN_RESPONSE	0.141638225255973	0.318965517241379	0.152144922367565	0.295378417003312	1.19687952512684	93	EXOSC5|CKS1B|SHC1|DKC1|HSPA9|MTHFD2|NHP2|NOLC1|BANF1|SEC11A|NOP56|DDX10|TSPYL2|EXOSC4|EIF4G1|EIF4EBP1|TUBB2A|YWHAZ|EEF2|CEBPG|DDIT4|RRP9|ZBTB17|SRPRB|ERN1|BAG3|EXOSC2|ALDH18A1|EIF4E|KHSRP|EIF4A3|ERO1A|XBP1|EIF2S1|EDEM1|SERP1|NOP14|SEC31A	38	13	0.342105263157895	0.496256265159923	Up (positive NES)
HALLMARK_OXIDATIVE_PHOSPHORYLATION	0.155088852988691	0.318965517241379	0.140406238523342	0.264705294141285	1.16151747329049	164	LDHB|GPI|NDUFB2|TIMM10|TIMM13|SLC25A6|UQCRH|HSPA9|GRPEL1|VDAC1|PHB2|COX4I1|COX7A2L|COX7C|OXA1L|MTX2|UQCRQ|NDUFA8|ECHS1|HTRA2|TOMM22|BDH2|BAX|SLC25A5|MDH1|FXN|ATP6V0B|MDH2|FDX1|UQCRFS1|TIMM9|NDUFV1	32	6	0.1875	0.496256265159923	Up (positive NES)
HALLMARK_ADIPOGENESIS	0.147058823529412	0.318965517241379	0.190023305279108	-0.253633	-1.15333	151	IFNGR1|ALDH2|LPL|QDPR|CD36|SULT1A1|NABP1|GBE1|SORBS1|ADIPOR2|LPCAT3|NDUFA5|ACADS|CPT2|SCARB1|ATL2|GPX3|PHLDB1|CMPK1|CDKN2C|DBT|CAT|MYLK|AGPAT3|BCL2L13|ELMOD3|PREB|DECR1|RNF11|MGST3|BCL6|COQ5|PEX14	33	6	0.181818181818182	0.496256265159923	Down (negative NES)
HALLMARK_TGF_BETA_SIGNALING	0.169565217391304	0.322192110809997	0.157402899305283	-0.334022	-1.21799	45	HIPK2|ID1|ID3|SMAD7|SPTBN1|ID2|FNTA|CDKN1C|SMURF2|BCAR3|SKIL|MAP3K7|BMPR2|KLF10	14	4	0.285714285714286	0.491885097913176	Down (negative NES)
HALLMARK_TNFA_SIGNALING_VIA_NFKB	0.173983739837398	0.322192110809997	0.132147260608774	0.261653631158503	1.14100237452558	157	TGIF1|ATP2B1|DUSP4|PTGS2|PHLDA2|GADD45A|RNF19B|BHLHE40|CLCF1|NR4A2|SMAD3|LITAF|EGR3|PFKFB3|IFNGR2|SAT1|GEM|IER3|PLPP3|TIPARP|NFKBIE|NFKB1|FOSB|MXD1|MAP2K3|FOSL1|RELB|HBEGF|ETS2|RCAN1|TUBB2A|TNIP2|SPSB1|PDLIM5|SPHK1|PLAUR|EGR2|PTGER4|PTPRE|TNFAIP2|DUSP5|NFAT5|NINJ1|NR4A3|ZBTB10|B4GALT5|NFIL3	47	12	0.25531914893617	0.491885097913176	Up (positive NES)
HALLMARK_WNT_BETA_CATENIN_SIGNALING	0.191729323308271	0.330567798807363	0.135740943810425	0.383293623372077	1.21389690911144	28	CCND2|LEF1|JAG2|CSNK1E|TP53	5	3	0.6	0.480739454096068	Up (positive NES)
HALLMARK_COMPLEMENT	0.18796992481203	0.330567798807363	0.160801401070022	-0.256978	-1.13176	120	CEBPB|CD36|F8|CPM|L3MBTL4|CTSO|CA2|APOBEC3G|FYN|ERAP2|IL6|GATA3|CXCL1|IRF2|LAMP2|IRF1|GNAI3|JAK2|PSEN1|PRDM4|CASP7|SPOCK2|LAP3|USP16|VCPIP1	25	9	0.36	0.480739454096068	Down (negative NES)
HALLMARK_UV_RESPONSE_DN	0.240677966101695	0.38819026790596	0.112378519110475	0.273766490843625	1.11850151179679	96	ATP2B1|INSIG1|COL1A1|MGLL|LAMC1|MGMT|BHLHE40|FHL2|SMAD3|ANXA2|ATXN1|SYNJ2|RUNX1|SLC7A1|SRI|PLPP3|NFKB1|ANXA4|ABCC1|INPP4B|PDLIM5|CITED2|CELF2	23	8	0.347826086956522	0.410955356757342	Up (positive NES)
HALLMARK_MITOTIC_SPINDLE	0.234375	0.38819026790596	0.14551614609036	-0.238601	-1.09252	156	ABR|ARHGAP4|SSH2|KIF20B|TUBD1|PCGF5|PREX1|FARP1|EPB41L2|SASS6|CEP250|SUN2|BIN1|CDC42BPA|KATNA1|SPTBN1|CNTRL|ALMS1|HDAC6|OPHN1|RAPGEF6|WASF2|VCL|SMC4|TAOK2|KLC1|LATS1|ARHGAP5|SHROOM1|DLG1|TUBGCP3|SORBS2|ARHGAP29|APC|RICTOR|DOCK4|ARHGAP27|CEP131|SPTAN1|RAPGEF5|CKAP5|ARAP3|PALLD|KIFAP3|KIF5B|STAU1|CDC42EP4|CENPJ|ABI1|TUBGCP5|FGD4|CLASP1|CEP192|MARCKS	54	4	0.0740740740740741	0.410955356757342	Down (negative NES)
HALLMARK_HEDGEHOG_SIGNALING	0.24866785079929	0.38854351687389	0.11331290842208	0.419094473814468	1.18806436236916	17	CELSR1|NRP2|ETS2|TLE3|MYH9|NRP1|ADGRG1	7	1	0.142857142857143	0.410560333156995	Up (positive NES)
HALLMARK_REACTIVE_OXYGEN_SPECIES_PATHWAY	0.2875226039783	0.422827358791618	0.105125131597001	0.314913118267684	1.10653405901974	42	PRDX4|SBNO2|G6PD|PRDX6|HMOX2|PFKP|ABCC1|MSRA|PDLIM1|LAMTOR5|ERCC2|PRNP|GLRX2|LSP1|FES|STK25|GPX4|SOD2	18	7	0.388888888888889	0.373836919690483	Up (positive NES)
HALLMARK_ALLOGRAFT_REJECTION	0.279646017699115	0.422827358791618	0.105520936843198	0.280572627887732	1.0972757975972	78	CCND2|HIF1A|EIF3J|CD74|TGFB1|IFNGR2|NME1|EIF3D|ETS1|DYRK3|CTSS|GALNT1|FLNA|TIMP1|STAB1|CSK|ABCE1|HCLS1|IRF7|CAPG|F2R	21	10	0.476190476190476	0.373836919690483	Up (positive NES)
HALLMARK_IL2_STAT5_SIGNALING	0.30114566284779	0.430208089782558	0.096240602328129	0.252404222190866	1.07817388396595	130	CCND2|PNP|CD79B|UCK2|MYO1E|NDRG1|BHLHE40|CD81|MAPKAPK2|ABCB1|PRAF2|SNX9|COL6A1|NT5E|BATF3|MXD1|SLC39A8|ANXA4|RGS16|PLEC|ARL4A|IL3RA|RORA|CTSZ|NOP2|PTRH2|SELP|ODC1|BCL2|PUS1|PLIN2|MUC1|SLC1A5|CAPG|EMP1|TNFRSF4	36	15	0.416666666666667	0.366321427247275	Up (positive NES)
HALLMARK_PROTEIN_SECRETION	0.322815533980583	0.448354908306365	0.116739204791222	-0.257109	-1.06543	84	STX12|YIPF6|VPS4B|VAMP7|RAB5A|GALC|TPD52|VAMP3|LAMP2|ATP7A|SNX2|STX7|CLCN3|ARFIP1|NAPA|MON2|STAM|ZW10|SNAP23|TSG101|VPS45|SCAMP1|CLN5|COPE|RAB9A|COG2|RAB14|NAPG|PPT1|COPB2|MAPK1|ARFGEF1|ATP6V1H|VAMP4|TMX1	35	7	0.2	0.348378071497317	Down (negative NES)
HALLMARK_APOPTOSIS	0.338308457711443	0.45717359150195	0.0902635484340068	0.252196840316175	1.06369453992634	120	CCND2|HSPB1|LEF1|DAP|BID|GADD45A|MGMT|ANKH|IGFBP6|KRT18|HMOX1|LMNA|EGR3|SAT1|TIMP2|IER3|BCL2L11|TIMP1|CASP2|DAP3|DFFA	21	8	0.380952380952381	0.339918864445229	Up (positive NES)
HALLMARK_MYOGENESIS	0.431034482758621	0.567150635208711	0.0791316651768349	0.251046399409139	1.01266584840377	92	MYL6B|COL1A1|MAPK12|TGFB1|BHLHE40|IGFBP7|SVIL|TPD52L1|COL6A3|PDLIM7|KIFC3|MEF2C|COL6A2|HBEGF|NAV2|PLXNB2|AGRN|AKT2|FXYD1|SPHK1|WWTR1|LPIN1	22	5	0.227272727272727	0.246301577171691	Up (positive NES)
HALLMARK_KRAS_SIGNALING_UP	0.450946643717728	0.573941562313656	0.0766746872490091	0.245658776556879	1.00628351716629	102	CCND2|LY96|PTGS2|ANKH|ADGRA2|ABCB1|PLVAP|ETS1|MPZL2|PTBP2|ITGA2|CTSS|DNMBP|RGS16|USP12|CFH|HBEGF|SPRY2|TSPAN13|ZNF277|ST6GAL1|DUSP6|AKT2|PLAUR|EMP1|GPRC5B|SDCCAG8|ETV5|PRELID3B|IRF8|ERO1A	31	10	0.32258064516129	0.241132324425547	Up (positive NES)
HALLMARK_ESTROGEN_RESPONSE_LATE	0.493103448275862	0.573941562313656	0.0721797965581253	0.244743384391081	0.987240874909682	92	SLC29A1|OLFM1|PPIF|MDK|MYOF|TPBG|FKBP4|EGR3|TPD52L1|NXT1|FLNB|GALE|CD9|TSPAN13|NAB2|CLIC3|PDCD4|BCL2|FABP5|GLA|HPRT1	21	7	0.333333333333333	0.241132324425547	Up (positive NES)
HALLMARK_FATTY_ACID_METABOLISM	0.480392156862745	0.573941562313656	0.0925528864684773	-0.225312	-0.982642	112	INMT|CD36|SERINC1|ADIPOR2|CBR1|CA2|MCEE|ACADS|ALDH9A1|HPGD|CPT2	11	5	0.454545454545455	0.241132324425547	Down (negative NES)
HALLMARK_ANGIOGENESIS	0.486187845303867	0.573941562313656	0.0762797180809272	0.347567779735308	0.9805967697088	18	CCND2|JAG2	2	1	0.5	0.241132324425547	Up (positive NES)
HALLMARK_APICAL_SURFACE	0.493589743589744	0.573941562313656	0.0833634065110386	-0.323219	-0.969429	20	ADIPOR2|AKAP7|GATA3|EFNA5|APP	5	0	0	0.241132324425547	Down (negative NES)
HALLMARK_BILE_ACID_METABOLISM	0.541202672605791	0.609126984126984	0.0806388495950661	-0.244463	-0.958601	59	NUDT12|AR|RXRA|NR3C2|ALDH9A1|CROT|SULT1B1|PEX19|CAT|BCAR3|ABCD3|NEDD4|OPTN|ABCA3|ALDH1A1|MLYCD|LIPE|PHYH|HSD17B11	19	8	0.421052631578947	0.215292160968339	Down (negative NES)
HALLMARK_CHOLESTEROL_HOMEOSTASIS	0.548214285714286	0.609126984126984	0.0686325631836726	0.254116528066562	0.956820259003383	61	ACTG1|SQLE|ACAT2|ETHE1|NSDHL|CD9|FABP5|LGALS3|PLAUR|DHCR7|CXCL16|TNFRSF12A|NFIL3|SREBF2|CLU|FASN|ATF5|LGMN|PPARG|ABCA2|EBP|MVD|S100A11|ECH1|ANXA5|SCD|HMGCS1|TMEM97	28	5	0.178571428571429	0.215292160968339	Up (positive NES)
HALLMARK_NOTCH_SIGNALING	0.725910064239829	0.789032678521553	0.0637845390312975	-0.266003	-0.838359	24	ARRB1|PSEN2|RBX1|CCND1|SKP1|HES1	6	3	0.5	0.102905009708585	Down (negative NES)
HALLMARK_PEROXISOME	0.776255707762557	0.825803944428252	0.0636424081651019	-0.208815	-0.849569	73	PEX2|VPS4B|ALDH9A1|DHRS3|ERCC3|SLC25A4|CAT|ABCD3|BCL10|HMGCL|CADM1|CNBP|PEX14|ALDH1A1|MLYCD|HSD17B11|ABCC5|IDE|LONP2|GNPAT|YWHAH|SLC25A17|PRDX1|ACSL1|FDPS|HSD17B4|ACOT8|PEX11B|MVP	29	10	0.344827586206897	0.0831230470615431	Down (negative NES)
HALLMARK_PANCREAS_BETA_CELLS	0.847457627118644	0.882768361581921	0.0559428593065705	-0.282357	-0.728352	11	SRP9|ELP4	2	0	0	0.0541532403456938	Down (negative NES)
HALLMARK_SPERMATOGENESIS	0.912885662431942	0.93151598207341	0.0454059226590179	0.202925043741669	0.723063543912006	44	PEBP1|PSMG1|PIAS2|DBF4|MLF1|ARL4A|HSPA2|LPIN1|GSTM3|PGS1|NPHP1|AGFG1	12	4	0.333333333333333	0.0308096894883525	Up (positive NES)
HALLMARK_PI3K_AKT_MTOR_SIGNALING	1	1	0.0395979123961192	0.131512154718031	0.514721146515523	77	PLCB1|PDK1|SLC2A1|PFN1|MAP2K3|CDK4|THEM4|PPP2R1B|EIF4E|RALB|CFL1|MYD88	12	7	0.583333333333333	0	Up (positive NES)

## Sheet: TableS18(Hallmark_GSEA_EPcells)
Table S18: Hallmark GSEA of Epithelial Cell in response to Exposure A (train set).
pathway	pval	padj	log2err	ES	NES	size	leadingEdge	leadingEdgeSize	overlap_exposureA_leadingEdge	overlap_frac	neglog10FDR	Direction
HALLMARK_CHOLESTEROL_HOMEOSTASIS	3.87449791732842e-10	1.93724895866421e-08	0.814035837847908	-0.63676	-2.46652	64	FABP5|LPL|SCD|FASN|IDI1|LSS|TMEM97|LGMN|EBP|ACSS2|MVK|SC5D|FDPS|FADS2|ECH1|DHCR7|ACAT2|CHKA|HMGCS1|PNRC1|FDFT1|HMGCR|MVD|STARD4|SREBF2|PDK3|CYP51A1|TM7SF2|TRIB3|NFIL3|CPEB2|LDLR	32	9	0.28125	7.71281456388266	Down (negative NES)
HALLMARK_ADIPOGENESIS	1.36441306360767e-09	3.41103265901917e-08	0.788186810800237	-0.477884	-2.1539	160	MCCC1|LPL|SULT1A1|QDPR|CD302|CD36|CAT|ECH1|DHCR7|ARAF|GPAM|GPHN|LIPE|RMDN3|PHYH|TST|ACADS|BCL2L13|MGLL|ACAA2|SORBS1|SCARB1|FAH|GBE1|CPT2|PLIN2|LPCAT3|TANK|DBT|DDT|PPM1B|ABCB8|UQCR10|ACLY|ADIPOR2|AIFM1|SLC25A1|DHRS7|MYLK|RETSAT|SLC19A1|MGST3|SCP2|APLP2|ALDH2|CHUK|MTCH2|MAP4K3|ATP1B3|ABCA1|ACADM|JAGN1|ACOX1	53	16	0.30188679245283	7.46711412240911	Down (negative NES)
HALLMARK_FATTY_ACID_METABOLISM	8.38076668470951e-09	1.39679444745159e-07	0.747739663149885	-0.51112	-2.18985	119	FASN|IDI1|ACSL1|BCKDHB|HSD17B4|CD36|SUCLG2|HPGD|CA2|ECH1|ACAT2|HMGCS1|ACADS|MGLL|ACAA2|GCDH|PRDX6|CPT2|HSDL2|ACSM3|DHCR24|SUCLA2|MCEE|NCAPH2|ADIPOR2|HSD17B11|RAP1GDS1|ETFDH|ACSL5|ALDH9A1|RETSAT|BLVRA|CRYZ|AUH|ACSS1|RDH11|G0S2|ACADVL|ENO2|ACSL4|ELOVL5|ACADM|ACAA1|HMGCL|ACOX1|UROS|SERINC1	47	12	0.25531914893617	6.85486750004596	Down (negative NES)
HALLMARK_EPITHELIAL_MESENCHYMAL_TRANSITION	7.40278193605813e-08	9.25347742007266e-07	0.704975715167238	0.531933685537648	2.18215077330491	103	FBLN2|TGFB1|TPM2|ANPEP|SLC6A8|SGCB|PFN2|GADD45A|CALD1|TIMP1|BASP1|SPOCK1|ITGA2|TGM2|LOXL1|PLOD3|SERPINE1|IGFBP2|COL1A1|TGFBI|SERPINH1|HTRA1|VIM|COL6A2|IGFBP3|LRP1|ITGB5|EFEMP2|P3H1|IL32|ADAM12|GPC1|PCOLCE|ACTA2|PLAUR|LGALS1|SPARC|COL6A3|FN1|MMP14|LOXL2|DST|WIPF1|PMEPA1|ITGAV|GLIPR1	46	13	0.282608695652174	6.03369503044528	Up (positive NES)
HALLMARK_INTERFERON_GAMMA_RESPONSE	9.57539576230852e-07	9.57539576230852e-06	0.643551836150722	0.442116849365317	1.92126546634007	158	ST8SIA4|CFH|MX2|IRF5|TRIM14|SAMHD1|PFKP|MYD88|PLSCR1|IFITM3|IFNAR2|TNFAIP2|MT2A|HERC6|CDKN1A|SSPN|PML|CCL2|ISG15|IFI44L|XAF1|C1R|UBE2L6|OAS2|LY6E|CD74|PSMB9|ZNFX1|CASP7|B2M|PSMB8|BST2|LYSMD2|RTP4|DDX60|IFITM2|SRI|PIM1|LAP3|IFI27|TAP1|SECTM1|PLA2G4A|LGALS3BP|IL4R|NLRC5|IL15RA|MX1|PSME2|SLC25A28|IL7|SERPING1|GBP4|IFI44|CD40|NMI|OGFR|ARL4A|STAT2|ARID5B|IRF2	61	13	0.213114754098361	5.01884326708939	Up (positive NES)
HALLMARK_OXIDATIVE_PHOSPHORYLATION	2.2772687235855e-06	1.89772393632125e-05	0.627256739718528	-0.413111	-1.86828	163	ALDH6A1|ACAT1|ACADSB|COX11|ECH1|MTRR|MPC1|OGDH|PHYH|ACAA2|RHOT1|SLC25A5|CYB5A|SLC25A20|NDUFS7|SUCLA2|NNT|FDX1|ETFA|UQCR10|SLC25A4|AIFM1|PDHX|ETFDH|ATP6V0E1|RETSAT|MGST3|ABCB7|SLC25A3|COX7A2L|NDUFS8|ACADVL|ACADM|ACAA1|MTRF1|ATP6V1G1|AFG3L2|CS|NDUFS1|TIMM13|ALAS1|ATP6V1E1|CYB5R3|IDH1|NDUFB6|OXA1L|COX17|IDH3A|ETFB|MTX2|HADHA|CYC1|PDHA1|UQCRQ|ATP6V1C1|GPX4|NDUFA2|NDUFA5|FH|NDUFV1|COX7A2|PDK4|IDH3B|ND…	66	10	0.151515151515152	4.72176696453906	Down (negative NES)
HALLMARK_INTERFERON_ALPHA_RESPONSE	0.000217827604503031	0.00155591146073594	0.518848077743792	0.46853011891932	1.85265881398041	83	TRIM14|PROCR|PLSCR1|IFITM3|HERC6|ISG15|IFI44L|UBE2L6|LY6E|CD74|PSMB9|B2M|PSMB8|BST2|RTP4|DDX60|IFITM2|LPAR6|LAP3|IFI27|TAP1|LGALS3BP|GBP2|IL4R|SAMD9|MOV10|MX1|PSME2|UBA7|SLC25A28|IL7|GBP4|IFI44|NMI|OGFR|STAT2|IRF2	37	5	0.135135135135135	2.80801512020485	Up (positive NES)
HALLMARK_PEROXISOME	0.00154143833269601	0.00963398957935003	0.45505986738723	-0.41431	-1.68288	83	IDI1|FADS1|ACSL1|HSD17B4|CADM1|FDPS|CAT|ECH1|ABCD3|DHCR24|ISOC1|PEX5|SLC25A4|HSD17B11|ACSL5|ALDH9A1|RETSAT|SCP2|CNBP|SOD2|SLC23A2|MVP|RDH11|ACSL4|ELOVL5|ACAA1|PEX13|HMGCL|ACOX1|CLN6|ATXN1|IDE	32	10	0.3125	2.01619382777799	Down (negative NES)
HALLMARK_ESTROGEN_RESPONSE_LATE	0.0035452077589394	0.017726038794697	0.431707695803346	-0.349526	-1.50116	116	FABP5|DCXR|TNNC1|PAPSS2|CHPT1|BLVRB|GALE|CISH|CLIC3|UNC13B|CA2|DHCR7|TSPAN13|CACNA2D2|MAPK13|ABCA3|TST|FDFT1|CAV1|IMPA2|SCARB1	21	7	0.333333333333333	1.75138830454628	Down (negative NES)
HALLMARK_MTORC1_SIGNALING	0.00341316139871633	0.017726038794697	0.431707695803346	-0.32722	-1.48001	171	SCD|IDI1|QDPR|FADS1|TMEM97|LGMN|EBP|CTH|ACACA|HK2|SC5D|FADS2|DHCR7|INSIG1|HMGCS1|LTA4H|CYB5B|BCAT1|UCHL5|HMGCR|STARD4|GBE1|HMBS|DHCR24|CYP51A1|TM7SF2|TRIB3|CCNG1|NFIL3|ACLY|ADIPOR2|LDLR|EDEM1|MTHFD2L|GGA2|DHFR|PDK1|PSMG1|GTF2H1|RRP9|ETF1|PPA1|SQLE|VLDLR|RDH11|ELOVL5	46	13	0.282608695652174	1.75138830454628	Down (negative NES)
HALLMARK_BILE_ACID_METABOLISM	0.00632208801377212	0.0287367636989642	0.407017918923954	-0.386831	-1.55055	75	IDI1|FADS1|ACSL1|TFCP2L1|HSD17B4|CAT|FADS2|HSD17B6|LIPE|ABCA3|NR3C2|PHYH|NPC1|ABCD3|DHCR24|ISOC1|PXMP2|PEX19|HSD17B11|ACSL5|ALDH9A1|RETSAT|PEX7|SCP2|SLC23A2|ABCA1|PEX13|NUDT12|ATXN1	29	10	0.344827586206897	1.54156214318934	Down (negative NES)
HALLMARK_XENOBIOTIC_METABOLISM	0.0156933090197877	0.0653887875824489	0.352487857583619	-0.315122	-1.37483	130	DCXR|RAP1GAP|PAPSS2|COMT|FBP1|BLVRB|TMEM97|CD36|CA2|CAT|ECH1|ATOH8|BCAT1|LPIN2|FAH|CYB5A|PMM1|CYFIP2|NPC1|ACP1|DDT|MAN1A1|LONP1|ID2|DHRS7|ETFDH|CNDP2|ALDH9A1|RETSAT|PROS1	30	9	0.3	1.18449671510908	Down (negative NES)
HALLMARK_HEME_METABOLISM	0.019936025738384	0.0766770220707078	0.352487857583619	-0.304546	-1.35586	144	RAP1GAP|ALDH6A1|BLVRB|CLIC2|BNIP3L|CCND3|CA1|CA2|CAT|LPIN2|ATP6V0A1|HEBP1|SLC25A38|PPP2R5B|SELENBP1|GLRX5|TNS1|HMBS|EPB41|NNT|FN3K|FOXJ2|ACP5|FBXO9|MARK3|HAGH|MGST3|BLVRA|TRAK2|ADIPOR1|KAT2B|FOXO3|CDC27|FECH|ARL2BP|SLC11A2|UROS|GDE1|GAPVD1|MXI1|DCAF11|ERMAP|BACH1|TOP1|ABCB6|GMPS|NCOA4	47	13	0.276595744680851	1.11533476229597	Down (negative NES)
HALLMARK_ANDROGEN_RESPONSE	0.0230548518097262	0.0823387564633078	0.352487857583619	-0.349598	-1.42296	84	SCD|IDI1|FADS1|DBI|CCND3|HSD17B14|HPGD|TPD52|INSIG1|HMGCS1|HMGCR|GPD1L|DHCR24|ANKH|AKT1|MERTK|ABCC4|MYL12A	18	8	0.444444444444444	1.08439569630382	Down (negative NES)
HALLMARK_MYOGENESIS	0.0452173913043478	0.150724637681159	0.282013350011725	0.332769897345827	1.36512145887478	103	NCAM1|ITGB4|TGFB1|PDLIM7|TPM2|SLC6A8|CLU|IGFBP7|TNNI2|GAA|CDKN1A|SSPN|COL1A1|APP|TNNT3|COL6A2|IGFBP3|ITGB5|ADAM12|AGRN|NQO1|SPARC|COL6A3|LSP1|SMTN|GSN|MAPRE3|AEBP1|SPHK1|DMD|TSC2|PTP4A3|MYH11|SH3BGR|MYH9	35	9	0.257142857142857	0.821815751438475	Up (positive NES)
HALLMARK_PROTEIN_SECRETION	0.0615384615384615	0.192307692307692	0.271288554688953	-0.325577	-1.33389	85	TPD52|STAM|NAPA|IGF2R|KIF1B|ATP1A1|STX12|SNX2|OCRL|ARF1|SEC22B|BET1|MAPK1|RAB9A|VAMP7|SGMS1|ABCA1|PPT1|COG2|MON2|AP3B1|RAB2A|ATP7A|VAMP4|ARFIP1|RAB5A|USO1|ARFGEF2|VPS45|VAMP3|SNAP23|COPE|AP2S1|AP3S1	34	9	0.264705882352941	0.716003343634799	Down (negative NES)
HALLMARK_ALLOGRAFT_REJECTION	0.0687830687830688	0.202303143479614	0.227987202850442	0.326898386489172	1.33719864095778	94	GCNT1|ST8SIA4|TGFB1|ITK|CDKN2A|TIMP1|IFNAR2|CCL2|CD74|IL16|B2M|IFNGR2|TAP1|EIF3J|GBP2|EIF4G3|IL4R|LYN|IL7|CD40|CSK|HDAC9|CD247|NME1|BCL10|DYRK3|CSF1|IRF7|PTPN6|FAS|TAPBP|IL18|STAT1|ETS1|IKBKB|CTSS|BCL3|CD4|HCLS1	39	18	0.461538461538462	0.693997368908662	Up (positive NES)
HALLMARK_APICAL_SURFACE	0.0900562851782364	0.250156347717323	0.204294756516886	0.481710516822494	1.38995617523268	21	SULF2|APP|AFAP1L2|RTN4RL1|PLAUR|HSPB1|LYN|EFNA5|CROCC|GSTM3|ATP8B1	11	3	0.272727272727273	0.601788472418272	Up (positive NES)
HALLMARK_ESTROGEN_RESPONSE_EARLY	0.100702576112412	0.26500677924319	0.216542836735348	-0.285292	-1.23522	127	GAB2|FASN|PAPSS2|CHPT1|BLVRB|CISH|DLC1|CLIC3|TMEM164|DHCR7|SLC19A2|ABCA3|FDFT1|DEPTOR|MUC1|SCARB1|ITPK1|AKAP1|TIPARP|MED13L|SNX24|SCNN1A|OLFM1|CD44|JAK2|TBC1D30|SYBU|MREG|TPD52L1|MYC|KLF10|ELOVL5	32	13	0.40625	0.576743016062248	Down (negative NES)
HALLMARK_P53_PATHWAY	0.116438356164384	0.291095890410959	0.169570644405628	0.276614036492938	1.20203680117913	157	DGKA|STEAP3|FDXR|ITGB4|TGFB1|DDIT4|CDKN2A|ABCC5|GADD45A|PROCR|CD82|PHLDA3|KLF4|DEF6|CDKN1A|ZMAT3|PITPNC1|APP|MDM2|VWA5A|ST14|PERP|RALGDS|HRAS|RHBDF2|PLK2|ZFP36L1|PRMT2|PLK3|BAK1|TAP1|KIF13B|CCP110|DDB2|RAD9A	35	9	0.257142857142857	0.535963925734126	Up (positive NES)
HALLMARK_INFLAMMATORY_RESPONSE	0.12695652173913	0.302277432712215	0.163180127180689	0.286551147275505	1.20486184166474	121	HRH1|LPAR1|ADM|CD82|TIMP1|SERPINE1|GNA15|CDKN1A|CCL2|TPBG|LY6E|BST2|IFNGR2|PTGER4|RTP4|ATP2A2|SRI|ADORA2B|PLAUR|MMP14|IL4R|IL15RA|SPHK1|LYN|AXL|CD40|NMI|PTAFR|BTG2|TNFSF10|GABBR1|CSF1|GPR183|IRF7|TAPBP|AQP9|IL18|IRAK2|KCNJ2|IL7R|SEMA4D|RGS1|EMP3|ITGB3	44	19	0.431818181818182	0.519594274967075	Up (positive NES)
HALLMARK_UV_RESPONSE_UP	0.140552995391705	0.319438625890239	0.179782316298324	-0.273364	-1.17406	116	SULT1A1|CCND3|RAB27A|CA2|CHKA|CYB5B|TST|CREG1|PRKCD|FURIN|NFKBIA|CXCL2|ICAM1|BTG3|NUP58|SLC25A4|CDK2|OLFM1|GLS|SOD2|IRF1|AMD1|ENO2|ACAA1|BTG1|PLCL1|EIF2S3|DGAT1|KLHDC3|PPT1|ARRB2|ALAS1|PARP2|HSPA13	34	8	0.235294117647059	0.495612570987931	Down (negative NES)
HALLMARK_COAGULATION	0.159709618874773	0.347194823640811	0.147331213699377	0.317025049250439	1.21056077484807	68	CFH|PLAU|CLU|CRIP2|TIMP1|ITGA2|SERPINE1|C1R|HTRA1|CAPN5|LRP1|USP11|DUSP14|THBD|CTSB|FYN|SPARC|A2M|FN1|GSN|MMP14	21	10	0.476190476190476	0.459426758383191	Up (positive NES)
HALLMARK_KRAS_SIGNALING_UP	0.167832167832168	0.34965034965035	0.140406238523342	0.282918582444244	1.18568475130909	120	KCNN4|CFH|PLAU|PCSK1N|TMEM176A|CROT|KLF4|ITGA2|TMEM176B|TRIB2|VWA5A|JUP|ADAM8|IKZF1|EMP1|PSMB8|IGFBP3|AKAP12|EPHB2|GYPC|LY96|CD37|NIN|PLAUR|GNG11	25	7	0.28	0.456366033129043	Up (positive NES)
HALLMARK_GLYCOLYSIS	0.18213058419244	0.36426116838488	0.132846300606183	0.270021211944021	1.15368892618996	139	SLC16A3|AK4|DDIT4|PFKP|EGLN3|B3GNT3|TPBG|GCLC|TGFBI|BIK|PKP2|CAPN5|PSMC4|IGFBP3|IL13RA1|FKBP4|KIF2A|PYGL|AGRN|GPC1|ADORA2B|GNE|LHPP|SRD5A3|B4GALT4|PRPS1|SOD1|PKM|B3GALT6|IER3|STMN1|CHPF2|ANKZF1|VCAN|EXT2|HDLBP|SLC35A3|ALDH7A1|CXCR4|XYLT2	40	15	0.375	0.438587123721137	Up (positive NES)
HALLMARK_KRAS_SIGNALING_DN	0.254083484573503	0.47810421286031	0.11331290842208	0.31336267551869	1.13405861481524	54	SIDT1|MFSD6|EFHD1|ENTPD7|IGFBP2|IFI44L|GAMT|SLC29A3|SLC5A5|RIBC2|SNN|CAMK1D|PDE6B|MX1|CELSR2|ASB7|BTG2|LFNG	18	0	0	0.320477429460611	Up (positive NES)
HALLMARK_MYC_TARGETS_V2	0.287545787545788	0.47810421286031	0.105920292736253	0.307524455588266	1.10918204762132	53	SORD|BYSL|DUSP2|GNL3|GRWD1|PES1|NOP56|AIMP2|CBX3|NOP2|HSPD1|IPO4|MCM4|EXOSC5|WDR74|RRP12|DCTPP1|WDR43	18	5	0.277777777777778	0.320477429460611	Up (positive NES)
HALLMARK_APOPTOSIS	0.283478260869565	0.47810421286031	0.103576326612592	0.259139232287371	1.09344705600273	126	FDXR|BID|CLU|IGFBP6|GADD45A|TIMP1|LEF1|IFITM3|GNA15|CDKN1A|APP|PAK1|WEE1|BIK|CASP7|EMP1|DNAJA1|TAP1|MGMT|NEDD9|GSN|BCAP31|LMNA|HSPB1|SOD1|IER3|LGALS3|ANXA1|PDCD4|SLC20A1|BTG2|BAX|RARA|BCL10|TNFSF10|SAT1	36	14	0.388888888888889	0.320477429460611	Up (positive NES)
HALLMARK_HYPOXIA	0.303819444444444	0.47810421286031	0.0992333343771191	0.253469391833713	1.07579148128321	133	AK4|DDIT4|ADM|SLC2A1|LXN|PFKP|GAA|MT2A|TGM2|SERPINE1|CP|HS3ST1|CDKN1A|CSRP2|TPBG|AMPD3|TGFBI|ANXA2|IGFBP3|AKAP12|NAGK|IDS|GPC1|ADORA2B|PIM1|PLAUR|MT1E	27	12	0.444444444444444	0.320477429460611	Up (positive NES)
HALLMARK_TNFA_SIGNALING_VIA_NFKB	0.298456260720412	0.47810421286031	0.0995791200495904	0.244231656748233	1.06649743888982	165	PHLDA1|DUSP4|PLAU|MARCKS|KYNU|HES1|GADD45A|DUSP2|KLF4|TNFAIP2|TUBB2A|SERPINE1|CDKN1A|CCL2|KLF2|PDLIM5|LITAF|IFNGR2|PTGER4|PLK2|FOSL1|PLAUR|JAG1|LAMB3|TAP1|SPSB1|SNN|TNIP2|IL15RA|FOSL2|PLPP3|SPHK1|PMEPA1|IER3|BIRC2|CLCF1|BTG2|PHLDA2|SAT1|DUSP5|CSF1|TRAF1|SERPINB8|GPR183|IFIH1|B4GALT5	46	14	0.304347826086957	0.320477429460611	Up (positive NES)
HALLMARK_PI3K_AKT_MTOR_SIGNALING	0.305986696230599	0.47810421286031	0.114266502484433	-0.261961	-1.06625	84	MAPK9|ACACA|ITPR2|NOD1|PIKFYVE|TRIB3|AKT1|MKNK1|PTPN11|CDK2|SMAD2|ARF1|PDK1|MAPK1|MAPK8|THEM4|PLA2G12A|CDK4|MKNK2|RIT1|SLA|NFKBIB|CDK1	23	16	0.695652173913044	0.320477429460611	Down (negative NES)
HALLMARK_IL2_STAT5_SIGNALING	0.283018867924528	0.47810421286031	0.12384217120105	-0.241586	-1.06539	140	HOPX|CISH|CCND3|HK2|CA2|SOCS2|SLC39A8|AGER|RGS16|SLC29A2|PLAGL1|IGF2R|MUC1|FAH|PLIN2|FURIN|POU2F1|RABGAP1L|IL1R2|MYO1C|NFKBIZ|CD83|NFIL3|CD44|SNX14|RNH1|MAP3K8|GADD45B|SPRED2	29	5	0.172413793103448	0.320477429460611	Down (negative NES)
HALLMARK_APICAL_JUNCTION	0.341549295774648	0.502278376139188	0.0931454575337804	0.251273406195144	1.0477022387393	116	ITGB4|MDK|NEGR1|ITGA2|CERCAM|IRS1|CADM2|ACTN1|GAMT|CD99|CLDN15|TGFBI|PKD1|JUP|RAC2|HRAS|AMIGO2|ZYX|SIRPA	19	4	0.210526315789474	0.299055518487029	Up (positive NES)
HALLMARK_E2F_TARGETS	0.336538461538462	0.502278376139188	0.11331290842208	-0.232854	-1.03559	146	ORC2|RACGAP1|CKS2|RFC1|SHMT1|TIMELESS|SMC4|BRCA2|KIF22|RAD1|RAD21|CIT|TMPO|ATAD2|MMS22L|POLD1|PPM1D|USP1|DCK|RFC3|PAN2|NCAPD2|UBR7|MYC|CDC25B|CDK4|SMC1A|SRSF1|PDS5B|HUS1|CDK1|TIPIN|NAA38|CTPS1|UBE2T|SMC3|TUBG1|GSPT1|ASF1A|LUC7L3|XRCC6|DONSON|NUP153|MLH1	44	13	0.295454545454545	0.299055518487029	Down (negative NES)
HALLMARK_UV_RESPONSE_DN	0.48936170212766	0.679288914583032	0.0739901439101342	0.239413293548492	0.978664897070077	105	LPAR1|GCNT1|FHL2|SLC22A18|INPP4B|LTBP1|SERPINE1|IRS1|COL1A1|PDLIM5|SYNJ2|ANXA2|KALRN|MTA1|SRI|PRKAR2B|ADORA2B|FYN|MT1E|MGMT|IGF1R|PLPP3|PIK3CD|PEX14	24	9	0.375	0.167945472667777	Up (positive NES)
HALLMARK_TGF_BETA_SIGNALING	0.502673796791444	0.679288914583032	0.0728938564822936	0.277886239100741	0.977474102227048	46	TGFB1|SMAD1|SERPINE1|IFNGR2|BCAR3|CDK9|TGFBR1|PMEPA1|SLC20A1|HIPK2|ACVR1|CDKN1C|RAB31	13	7	0.538461538461538	0.167945472667777	Up (positive NES)
HALLMARK_ANGIOGENESIS	0.493506493506494	0.679288914583032	0.0758886900606117	0.340700761606511	0.962508214453593	19	TIMP1|APP|TNFRSF21|THBD|JAG1|ITGAV|VCAN|NRP1|JAG2|LRPAP1	10	2	0.2	0.167945472667777	Up (positive NES)
HALLMARK_NOTCH_SIGNALING	0.529850746268657	0.697172034564022	0.0725351864394589	0.309601455913304	0.946269159407144	26	HES1|DLL1|PSENEN|DTX2|MAML2|JAG1|TCF7L2	7	4	0.571428571428571	0.156660041926524	Up (positive NES)
HALLMARK_MITOTIC_SPINDLE	0.571428571428571	0.732600732600733	0.0822054920415869	-0.209478	-0.951385	173	MID1IP1|AKAP13|SSH2|CNTROB|BIN1|TUBGCP5|FGD4|RACGAP1|RAPGEF5|OPHN1|ARHGEF2|RFC1|RHOF|EPB41|CENPJ|KIF1B|SMC4|BRCA2|KIF22|CEP72|KIF20B|CEP57|TAOK2|SUN2|RAPGEF6|TBCD|TUBGCP3|TSC1|NUSAP1|CDC27|KATNA1|RABGAP1|DOCK2|ALS2|SMC1A	35	3	0.0857142857142857	0.135132651376775	Down (negative NES)
HALLMARK_COMPLEMENT	0.633680555555556	0.792100694444445	0.0602484086158019	0.21631266034614	0.916121953399691	132	CFH|KYNU|CLU|APOBEC3G|TIMP1|PLSCR1|SERPINE1|CP|DGKH|C1R|PSMB9|CASP7|DYRK2|LRP1|KIF2A|CTSB|PIM1|GNAI2|LAP3|PLAUR|FYN|FN1|PLA2G4A|MMP14|RCE1|CBLB|LYN|SERPING1|ANXA5|PRCP|LGALS3	31	12	0.387096774193548	0.101219605958681	Up (positive NES)
HALLMARK_REACTIVE_OXYGEN_SPECIES_PATHWAY	0.662192393736018	0.807551699678071	0.0704500850658419	-0.25655	-0.895298	41	FTL|CAT|TXNRD2|PRDX6|MGST1|OXSR1	6	3	0.5	0.0928296644567146	Down (negative NES)
HALLMARK_PANCREAS_BETA_CELLS	0.683884297520661	0.814147973238882	0.0649407684612899	-0.311592	-0.834961	13	DPP4|STXBP1|MAFB|VDR|SEC11A	5	1	0.2	0.0892966539305754	Down (negative NES)
HALLMARK_HEDGEHOG_SIGNALING	0.720973782771536	0.838341607873879	0.0577308549299813	0.278343967809289	0.811407765705904	22	ADGRG1|PML|NRP2|AMOT|CDK6|MYH9	6	1	0.166666666666667	0.0765789787636235	Up (positive NES)
HALLMARK_IL6_JAK_STAT3_SIGNALING	0.819964349376114	0.931777669745584	0.0494904866135495	0.215512033082206	0.802153721895251	59	TGFB1|MYD88|TNFRSF21|IFNGR2|IL13RA1|PIM1|BAK1|A2M|IL4R|IL15RA|IL7|STAT2|CSF2RA|CSF1|CD9|ITGA4|FAS|STAT1|IL17RA|ITGB3|IL3RA|CBL|TNFRSF1A|CXCL1	24	13	0.541666666666667	0.0306877017247559	Up (positive NES)
HALLMARK_WNT_BETA_CATENIN_SIGNALING	0.858736059479554	0.954151177199504	0.0492917662312669	0.236490012695784	0.754272623733997	32	LEF1|DLL1|TCF7|JAG1|CSNK1E	5	4	0.8	0.0203828095495885	Up (positive NES)
HALLMARK_G2M_CHECKPOINT	0.908235294117647	0.978099914270127	0.057609110864425	-0.182772	-0.804914	137	ARID4A|RACGAP1|CKS2|SMC4|BRCA2|KIF22|KIF20B|RAD21|TMPO|CCNT1|NUSAP1|CDC27|SQLE|AMD1|KATNA1|MYC|CDC25B|CDK4|SMC1A|SRSF1|SLC38A1|PDS5B|HUS1|CDK1|DR1|TOP1|PRC1|MTF2|PAFAH1B1|CUL4A|ORC5|GSPT1|RAD23B|DTYMK|SLC12A2|E2F4	36	14	0.388888888888889	0.00961677915941658	Down (negative NES)
HALLMARK_SPERMATOGENESIS	0.919413919413919	0.978099914270127	0.0454967810085007	0.202278791130407	0.727197111478258	52	PCSK1N|NPHP1|PACRG|SPATA6|MLF1|IFT88|ALOX15|ARL4A|HSPA2|PCSK4|JAM3|VDAC3|GSTM3	13	5	0.384615384615385	0.00961677915941658	Up (positive NES)
HALLMARK_UNFOLDED_PROTEIN_RESPONSE	0.939823008849558	0.978982300884956	0.0429311093452583	0.186297993183564	0.759523602838119	98	DDIT4|SLC1A4|SLC7A5|TUBB2A|CCL2|DNAJA4|HSP90B1|ALDH18A1|WIPI1|NOP56|EXOSC10|CXXC1|EXOSC4|YWHAZ|EXOSC5|EXOSC1|NFYA|ATF3|CALR|CNOT6	20	7	0.35	0.00922515977753788	Up (positive NES)
HALLMARK_DNA_REPAIR	0.993087557603687	1	0.0524827622635459	-0.156014	-0.680667	130	AK1|CMPK2|POLR2C|STX3|TAF12|TARBP2|AGO4|POLD1|RFC3|GTF2H1|POLH|RBX1	12	1	0.0833333333333333	0	Down (negative NES)
HALLMARK_MYC_TARGETS_V1	1	1	0.0536769600638127	-0.0842865	-0.378994	159	ORC2|GLO1|ACP1|HDDC2|CDK2|USP1|CNBP|SLC25A3|EXOSC7|RRP9|ETF1|MYC|CDK4|SRSF1|STARD7|EIF4H|EIF1AX|CTPS1|PSMD3|GSPT1|RAD23B|CYC1|XRCC6|TFDP1|EIF3B|RSL1D1|VBP1|AP3S1|PSMA1|DHX15|SF3A1|SF3B3|ODC1|ABCE1|MCM7|UBA2|HNRNPU|PCBP1|EIF4G2|CUL1|PCNA|SET|SNRPD3|IMPDH2|DUT|PGK1|PPM1G|SNRPB2|SRM|PSMD8|EIF4E|YWHAQ|PRPF31|PHB2|PSMB2|PSMB3|PSMA4|SSBP1|SRSF2|MCM6|CANX|SYNCRIP|SRSF3|SNRPG|EEF1B2|TRIM28|HNRNPA2B1|VDAC…	159	62	0.389937106918239	0	Down (negative NES)
