# Supplementary material
Source: Research Square preprint supplement (doi:10.21203/rs.3.rs-9392286/v1)
Supplement: Supplementary file 9 [file 6de9d42c290124d8bf4bfe12.xlsx]

## Sheet: Table S13(testmodel.classMatrix
Table S13: Class Matrix of Model(Testing set）
id	SVM	glmBoost.SVM	Ridge	Lasso.SVM	glmBoost.Ridge	Enet.alpha.0.1.	glmBoost.Enet.alpha.0.1.	Enet.alpha.0.2.	Enet.alpha.0.3.	glmBoost.Enet.alpha.0.3.	glmBoost.Enet.alpha.0.2.	Enet.alpha.0.4.	glmBoost.Enet.alpha.0.4.	Lasso.glmBoost	Enet.alpha.0.5.	glmBoost	glmBoost.Enet.alpha.0.5.	Enet.alpha.0.6.	glmBoost.Enet.alpha.0.6.	glmBoost.Enet.alpha.0.7.	glmBoost.Enet.alpha.0.8.	Enet.alpha.0.8.	Enet.alpha.0.9.	Lasso	Enet.alpha.0.7.	glmBoost.Enet.alpha.0.9.	glmBoost.Lasso	Lasso.plsRglm	glmBoost.plsRglm	glmBoost.Stepglm.forward.	Lasso.Stepglm.forward.	RF.SVM	Stepglm.forward.	plsRglm	RF.Ridge	RF.Enet.alpha.0.1.	RF.plsRglm	RF.Stepglm.forward.	RF.Enet.alpha.0.2.	RF.Enet.alpha.0.3.	RF.Enet.alpha.0.6.	RF.Lasso	RF.Enet.alpha.0.7.	RF.glmBoost	RF.Enet.alpha.0.4.	RF.Enet.alpha.0.8.	RF.Stepglm.both.	RF.Stepglm.backward.	Stepglm.both..Ridge
GSM3891623	0	0	1	0	1	1	1	1	1	1	1	1	1	1	1	1	1	1	1	1	1	1	1	1	1	1	1	1	1	0	1	0	0	1	1	1	1	1	1	1	1	1	1	1	1	1	1	1	1
GSM3891625	0	0	1	0	1	1	1	1	1	1	1	1	1	1	1	1	1	1	1	1	1	1	1	1	1	1	1	1	1	0	1	0	0	1	1	1	1	1	1	1	1	1	1	1	1	0	1	1	1
GSM3891627	0	0	1	1	1	1	1	1	1	1	1	1	1	1	1	1	1	1	1	1	1	1	1	1	1	1	1	1	1	0	1	0	0	1	1	1	1	1	1	1	1	1	1	1	1	1	1	1	1
GSM3891629	0	0	1	1	1	1	1	1	1	1	1	1	1	1	1	1	1	1	1	1	1	1	1	1	1	1	1	1	1	0	1	0	0	1	1	1	1	1	1	1	1	1	1	1	1	0	1	1	1
GSM3891631	0	0	1	1	1	1	1	1	1	1	1	1	1	1	1	1	1	1	1	1	1	1	1	1	1	1	1	1	1	0	1	0	0	1	1	1	1	1	1	1	1	1	1	1	1	1	1	1	1
[truncated: 55 more columns]

## Sheet: TableS13(testmodel.riskMatrix)
Table S13：Risk Matrix of Model(Testing set)
id	SVM	glmBoost.SVM	Ridge	Lasso.SVM	glmBoost.Ridge	Enet.alpha.0.1.	glmBoost.Enet.alpha.0.1.	Enet.alpha.0.2.	Enet.alpha.0.3.	glmBoost.Enet.alpha.0.3.	glmBoost.Enet.alpha.0.2.	Enet.alpha.0.4.	glmBoost.Enet.alpha.0.4.	Lasso.glmBoost	Enet.alpha.0.5.	glmBoost	glmBoost.Enet.alpha.0.5.	Enet.alpha.0.6.	glmBoost.Enet.alpha.0.6.	glmBoost.Enet.alpha.0.7.	glmBoost.Enet.alpha.0.8.	Enet.alpha.0.8.	Enet.alpha.0.9.	Lasso	Enet.alpha.0.7.	glmBoost.Enet.alpha.0.9.	glmBoost.Lasso	Lasso.plsRglm	glmBoost.plsRglm	glmBoost.Stepglm.forward.	Lasso.Stepglm.forward.	RF.SVM	Stepglm.forward.	plsRglm	RF.Ridge	RF.Enet.alpha.0.1.	RF.plsRglm	RF.Stepglm.forward.	RF.Enet.alpha.0.2.	RF.Enet.alpha.0.3.	RF.Enet.alpha.0.6.	RF.Lasso	RF.Enet.alpha.0.7.	RF.glmBoost	RF.Enet.alpha.0.4.	RF.Enet.alpha.0.8.	RF.Stepglm.both.	RF.Stepglm.backward.	Stepglm.both..Ridge
GSM3891623	0.458419870731045	0.437053626517771	0.999899088479564	0.461921883315892	0.999954339002096	0.999166571897697	0.999865059478634	0.99909328039459	0.999272147533063	0.999571084820979	0.999716553089007	0.999455565259359	0.999294187380277	0.999308451562488	0.999435624792087	0.996656192184069	0.998868437407691	0.99921982541748	0.998991656855953	0.997432846693149	0.998477692112266	0.998619476792877	0.991639334173898	0.999998381916853	0.998965967112136	0.998696289920609	0.999998581531426	1	1	2.22044604925031e-16	1	0.381701511938971	2.22044604925031e-16	1	0.873283263623275	0.893432539334731	1	1	0.966607051067498	0.984269003728734	0.995137315976732	0.953793610606003	0.960259595470008	0.985367909315488	0.992471318202756	0.597231293135671	1	1	0.999954339002096
GSM3891625	0.458253175579059	0.437254986683582	0.999584023533804	0.439148145545482	0.999814603758356	0.996326312465105	0.999418204408717	0.995937569514957	0.996837189120055	0.998011219151764	0.998750377365883	0.997634267397952	0.996808283343428	0.998582691016121	0.99746080053619	0.995291451643725	0.994490896408825	0.996426389654845	0.994959863554947	0.98981328377034	0.994754510324776	0.995359051648267	0.985447118404453	0.999994860916407	0.995363888154258	0.997264812610345	0.999995235545989	1	1	1.40596465300831e-07	1	0.375427176840324	1.40596465300831e-07	1	0.946821992879458	0.939820897420651	1	1	0.981014895849024	0.990088605970024	0.994142826439756	0.851166037611255	0.921165281833132	0.951279454313986	0.994894210255588	0.436819838584331	1	1	0.999814603758356
GSM3891627	0.459365670624176	0.438576635046949	0.999996792308478	0.592374569224874	0.999997078400275	0.999945930618941	0.999988531647029	0.999919568219959	0.999920654106691	0.999943707241439	0.999970518486296	0.999926663448542	0.999904509783794	0.999762562471292	0.999915524318359	0.998687299498337	0.999853082579805	0.999899341818919	0.999863799295168	0.999776790390497	0.999884331958959	0.999899838205888	0.999084214710659	0.999999765436204	0.999877542024157	0.999937267573483	0.999999762364834	1	1	6.67688774017708e-12	1	0.380922236535604	6.67688774017708e-12	1	0.886474470338057	0.9031951219317	1	1	0.969222655706735	0.986922756232728	0.996730467044712	0.943715140055874	0.922408570796168	0.983609192718289	0.995306679363902	0.534902555070129	1	1	0.999997078400275
GSM3891629	0.45937130890247	0.438384802327674	0.999998981634158	0.548080599524298	0.999999488880291	0.999984767224251	0.999997979425398	0.999979786951329	0.999981699831772	0.99999043082788	0.99999477778866	0.999983327144111	0.999983349148499	0.999779875488483	0.999981676946489	0.998791942122378	0.999973462425813	0.999976979839088	0.999975876779516	0.999950674468484	0.999973107970827	0.999976093312094	0.999512377218825	0.999999868930045	0.999975542655649	0.999974658469494	0.99999986614454	1	1	6.34832220318723e-09	1	0.378433854702966	6.34832220318723e-09	1	0.908483027488468	0.889429834228708	1	1	0.963935489484676	0.98442030781153	0.995451934697726	0.872401139268058	0.94001708884904	0.957609470497825	0.993765185655905	0.475810293427601	1	1	0.999999488880291
GSM3891631	0.460080772860648	0.43944012180821	0.999995836262596	0.538039258394094	0.999997456605756	0.999912067462303	0.999988555405023	0.999862131222226	0.9998652227098	0.999928081228578	0.999965445665794	0.99988022992797	0.999858196048747	0.999559178298208	0.999862340029767	0.997918860427839	0.999762773806629	0.999819775768082	0.999771432137656	0.999457356793401	0.999751277099024	0.999789168562311	0.998170183230203	0.999999321601068	0.999766489110041	0.999841618814999	0.999999335671288	1	1	0.000106746900267373	1	0.373775859711634	0.000106746900267373	1	0.875545585526586	0.888695085189942	1	1	0.967518409283963	0.987374098909324	0.998314950534477	0.9806509171423	0.972838503847598	0.994166464203967	0.99552171772058	0.686863855788347	1	1	0.999997456605756
[truncated: 55 more columns]

## Sheet: Table S13(test_model.AUCmatrix)
Table S13: AUC Matrix of Model(Testing set)
Method	Overall	GSE132771
SVM	1	1
glmBoost+SVM	1	1
Ridge	1	1
Lasso+SVM	1	1
glmBoost+Ridge	1	1
Enet[alpha=0.1]	1	1
glmBoost+Enet[alpha=0.1]	1	1
Enet[alpha=0.2]	1	1
Enet[alpha=0.3]	1	1
glmBoost+Enet[alpha=0.3]	1	1
glmBoost+Enet[alpha=0.2]	1	1
Enet[alpha=0.4]	1	1
glmBoost+Enet[alpha=0.4]	1	1
Lasso+glmBoost	1	1
Enet[alpha=0.5]	1	1
glmBoost	1	1
glmBoost+Enet[alpha=0.5]	1	1
Enet[alpha=0.6]	1	1
glmBoost+Enet[alpha=0.6]	1	1
glmBoost+Enet[alpha=0.7]	1	1
glmBoost+Enet[alpha=0.8]	1	1
Enet[alpha=0.8]	1	1
Enet[alpha=0.9]	1	1
Lasso	1	1
Enet[alpha=0.7]	1	1
glmBoost+Enet[alpha=0.9]	1	1
glmBoost+Lasso	1	1
Lasso+plsRglm	0.5	0.5
glmBoost+plsRglm	0.5	0.5
glmBoost+Stepglm[forward]	0.333333333333333	0.333333333333333
Lasso+Stepglm[forward]	0.5	0.5
RF+SVM	0.666666666666667	0.666666666666667
Stepglm[forward]	0.333333333333333	0.333333333333333
plsRglm	0.5	0.5
RF+Ridge	0.5	0.5
RF+Enet[alpha=0.1]	0.833333333333333	0.833333333333333
RF+plsRglm	0.5	0.5
RF+Stepglm[forward]	0.5	0.5
RF+Enet[alpha=0.2]	0.666666666666667	0.666666666666667
RF+Enet[alpha=0.3]	0.5	0.5
RF+Enet[alpha=0.6]	1	1
RF+Lasso	0.666666666666667	0.666666666666667
RF+Enet[alpha=0.7]	0.333333333333333	0.333333333333333
RF+glmBoost	0.666666666666667	0.666666666666667
RF+Enet[alpha=0.4]	0.833333333333333	0.833333333333333
RF+Enet[alpha=0.8]	0.666666666666667	0.666666666666667
RF+Stepglm[both]	0.5	0.5
RF+Stepglm[backward]	0.5	0.5
Stepglm[both]+Ridge	1	1
Stepglm[backward]+Ridge	1	1
Stepglm[both]+plsRglm	0.5	0.5
Stepglm[backward]+plsRglm	0.5	0.5
Stepglm[both]+Enet[alpha=0.9]	1	1
Stepglm[backward]+Enet[alpha=0.9]	1	1
Stepglm[both]+Enet[alpha=0.1]	1	1
Stepglm[backward]+Enet[alpha=0.1]	1	1
Stepglm[both]+Enet[alpha=0.8]	1	1
Stepglm[backward]+Enet[alpha=0.8]	1	1
Stepglm[both]+Enet[alpha=0.2]	1	1
Stepglm[backward]+Enet[alpha=0.2]	1	1
Stepglm[both]+Lasso	1	1
Stepglm[backward]+Lasso	1	1
Stepglm[both]+Enet[alpha=0.6]	1	1
Stepglm[backward]+Enet[alpha=0.6]	1	1
Stepglm[both]+Enet[alpha=0.7]	1	1
Stepglm[backward]+Enet[alpha=0.7]	1	1
Stepglm[both]+Enet[alpha=0.4]	1	1
Stepglm[backward]+Enet[alpha=0.4]	1	1
Stepglm[both]+Enet[alpha=0.3]	1	1
Stepglm[backward]+Enet[alpha=0.3]	1	1
Stepglm[both]+glmBoost	1	1
Stepglm[backward]+glmBoost	1	1
Stepglm[both]+Enet[alpha=0.5]	1	1
Stepglm[backward]+Enet[alpha=0.5]	1	1
Stepglm[both]+SVM	1	1
Stepglm[backward]+SVM	1	1
LDA	1	1
glmBoost+LDA	1	1
RF+LDA	1	1
Stepglm[both]+LDA	1	1
Stepglm[backward]+LDA	1	1
Lasso+LDA	0.5	0.5
XGBoost	0.5	0.5
Lasso+XGBoost	0.833333333333333	0.833333333333333
glmBoost+XGBoost	0.5	0.5
RF+XGBoost	0.5	0.5
Stepglm[both]+XGBoost	0.5	0.5
Stepglm[backward]+XGBoost	0.5	0.5
NaiveBayes	0.5	0.5
Lasso+NaiveBayes	0.75	0.75
glmBoost+NaiveBayes	1	1
RF+NaiveBayes	0.5	0.5
Stepglm[both]+NaiveBayes	1	1
Stepglm[backward]+NaiveBayes	1	1
Stepglm[both]+Enet[alpha=0.8]+XGBoost	1	1
Stepglm[backward]+Enet[alpha=0.8]+glmBoost	1	1
Stepglm[both]+Enet[alpha=0.2]+GBM	1	1
Stepglm[backward]+Enet[alpha=0.2]+XGBoost	1	1
Stepglm[both]+Lasso+GBM	1	1
Stepglm[backward]+Lasso+RF	1	1
Stepglm[both]+Enet[alpha=0.6]+GBM	1	1
Stepglm[backward]+Enet[alpha=0.6]+GBM	1	1
Stepglm[both]+Enet[alpha=0.7]+GBM	1	1
Stepglm[backward]+Enet[alpha=0.7]+NaiveBayes	1	1
