# Supplementary material
Source: Research Square preprint supplement (doi:10.21203/rs.3.rs-9392286/v1)
Supplement: Supplementary file 10 [file 6f5cbcf1325867ad6bad635a.xlsx]

## Sheet: Table S7(train_celltype_scores)
Table S7: Score of all cell types in the training set
sample_id	B_cell	DC	Endothelial_cells	Epithelial_cells	Fibroblasts	Macrophage	Monocyte	Neutrophils	NK_cell	Smooth_muscle_cells	T_cells	Tissue_stem_cells
GSM3660641	-0.103816	0.14821255194271	1.26209412870655	0.848837348748004	0.220519814943286	2.85512155799246	0.731214034359487	0.379846764897726	0.216637629375869	0.0561839080376038	0.109821188069581	-0.0153554
GSM3660642	-0.0947273	0.388749783606088	1.54046993693026	1.57531125337908	0.043346547764238	3.26282971730458	0.953169255796672	0.528052143358007	-0.0811947	0.0409455329665013	0.352280201926044	0.00986283589158286
GSM3660643	-0.146788	0.296901501260521	1.5217307885756	1.51639904073661	0.229574549298025	3.16052757476311	0.612408333725134	0.0126175036628396	0.136871845929335	0.0765930586910348	0.280239488347862	0.145602368520227
GSM3660644	-0.172517	0.46373908080477	1.66835089562951	1.69887890066196	0.32391173879146	3.42801435074043	1.08599077272856	0.208935588169186	0.259639175047187	0.0727910241514105	0.262976401082582	0.0542878513682896
GSM3660645	-0.0755962	0.537085841494398	1.83041962107421	1.84884	0.277431397662508	3.44564140113904	1.00114221952925	0.658723838250885	-0.187089	0.0861259966059202	0.335868525009199	-0.182466
GSM3660646	-0.104251	0.605381592060156	1.55100568279409	1.63688407221214	0.175301347695397	3.17190455258514	1.38045844234047	0.173382787565821	0.123073822347405	0.0542845836751301	0.160277157644644	0.0178460221512587
GSM3660647	-0.0968514	0.390709113971557	1.6254133839699	1.75358213813457	-0.148601	3.37367666123949	0.895041430299928	0.600463745731911	-0.225497	0.0613706942611917	0.0874654299550011	0.102040292154732
GSM3660648	-0.135757	0.12825916906292	1.64470657538695	1.74210879634083	0.0453312483509091	3.3156641375784	0.820247020597972	0.475199124121361	-0.349327	0.0627363618091789	0.0951862631953274	-0.0599376
GSM3660652	-0.0725587	0.249322471013504	1.61876090908738	1.75509935613171	0.437032871309988	3.42908351495541	0.380458442340472	0.666273924777418	-0.212081	0.0486213127113213	0.175912336761394	-0.0344302
GSM3660653	-0.131984	0.741815938746397	1.79851801784917	1.64533016548389	0.529341485454169	3.57404036607061	0.685027307022678	0.605185187493435	0.456719512660782	0.0736974682082173	0.155370570460255	0.0793473273021877
GSM3660654	-0.0580207	1.00987063248111	1.6928923272628	1.6355425059492	0.709199815043838	3.32957282456974	0.388966057016056	0.619059595211025	0.142598548786778	0.0518770936961647	0.182286066717839	0.144452129841009
GSM3660655	-0.13454	0.0098706324811086	1.72952621015496	1.7527110014468	0.34905076995512	3.38456882766997	0.904741977319359	0.676512996947093	0.09305435544029	0.0489055454718598	0.189219457339472	0.00635980164388454
GSM3660656	-0.0717089	0.668883619688148	1.71678460909248	1.6563575262311	0.851399127313453	3.35012011330644	0.406411903293743	0.505204981954126	0.135123157386102	0.0600925715689399	0.0983911583022662	0.208015159957387

## Sheet: Table S7(train_celltype_CV_AUC)
Table S7: CV_AUC of all cell types in the training set
Celltype	CV_AUC
DC	1
Fibroblasts	1
Neutrophils	1
B_cell	0.9
Endothelial_cells	0.9
Epithelial_cells	0.9
Macrophage	0.9
Smooth_muscle_cells	0.9
Tissue_stem_cells	0.9
Monocyte	0.8
NK_cell	0.8
T_cells	0.8

## Sheet: Table S7(train_celltype_top6)
Table S7: Score ofTop 6 cell types in the training set
sample_id	sample	DC	Fibroblasts	Neutrophils	B_cell	Endothelial_cells	Epithelial_cells
1	GSM3660641	-1.02334	-0.329688	-0.419995	0.110842265464273	-2.53884	-3.11332
2	GSM3660642	-0.161288	-0.975352	0.270765375110694	0.375336291385966	-0.622104	-0.182135
3	GSM3660643	-0.490458	-0.29669	-2.13159	-1.13976	-0.751131	-0.419834
4	GSM3660644	0.107461979453767	0.0470985363144002	-1.21658	-1.88856	0.258408676433726	0.316436129406332
5	GSM3660645	0.370325591464381	-0.122288	0.879803814589167	0.932101294143306	1.37431831479724	0.921489131004305
6	GSM3660646	0.615087152982527	-0.494475	-1.38229	0.0981660808484323	-0.549561	0.0662991246835763
7	GSM3660647	-0.154266	-1.67486	0.608263479394806	0.313518076874365	-0.0372337	0.537152990992809
8	GSM3660648	-1.09485	-0.968119	0.0244264844733536	-0.818727	0.0956078351311963	0.490860301389361
9	GSM3660652	-0.660974	0.459340532596447	0.914993477659021	1.02050125727675	-0.0830387	0.543274668797326
10	GSM3660653	1.10404705843784	0.795736451922958	0.630269312600569	-0.708937	1.15466269388463	0.100377458722594
11	GSM3660654	2.06471422831695	1.45118566098967	0.694935555982017	1.44359597415991	0.4273864975629	0.0608861672637397
12	GSM3660655	-1.51913	0.138711519324505	0.962716043292217	-0.783306	0.67962580467086	0.533638124878464
13	GSM3660656	0.842668742071741	1.9693958932852	0.164278660146604	1.04523114854967	0.591894656080717	0.144870702050739
