# Supplementary material
Source: Research Square preprint supplement (doi:10.21203/rs.3.rs-9392286/v1)
Supplement: Supplementary file 11 [file 7c98db67098cb851cd71348d.xlsx]

## Sheet: TableS10(OOF_all_models)
Table S9: OOF_all_models_metrics(Training set)
TP	FP	TN	FN	Accuracy	Precision	Recall	F1	Specificity	BalancedAcc	Model
5	0	8	0	1	1	1	1	1	1	OOF_Lasso+glmBoost
5	0	8	0	1	1	1	1	1	1	OOF_Lasso+plsRglm
5	0	8	0	1	1	1	1	1	1	OOF_glmBoost+plsRglm
5	0	8	0	1	1	1	1	1	1	OOF_glmBoost+Stepglm[forward]
5	0	8	0	1	1	1	1	1	1	OOF_Lasso+Stepglm[forward]
5	0	8	0	1	1	1	1	1	1	OOF_Stepglm[forward]
5	0	8	0	1	1	1	1	1	1	OOF_Stepglm[both]+plsRglm
5	0	8	0	1	1	1	1	1	1	OOF_Stepglm[backward]+plsRglm
5	0	8	0	1	1	1	1	1	1	OOF_Stepglm[both]+glmBoost
5	0	8	0	1	1	1	1	1	1	OOF_Stepglm[backward]+glmBoost
5	0	8	0	1	1	1	1	1	1	OOF_LDA
5	0	8	0	1	1	1	1	1	1	OOF_glmBoost+LDA
5	0	8	0	1	1	1	1	1	1	OOF_Stepglm[both]+LDA
5	0	8	0	1	1	1	1	1	1	OOF_Stepglm[backward]+LDA
5	0	8	0	1	1	1	1	1	1	OOF_Lasso+LDA
5	0	8	0	1	1	1	1	1	1	OOF_XGBoost
5	0	8	0	1	1	1	1	1	1	OOF_Lasso+XGBoost
5	0	8	0	1	1	1	1	1	1	OOF_glmBoost+XGBoost
5	0	8	0	1	1	1	1	1	1	OOF_Stepglm[both]+XGBoost
5	0	8	0	1	1	1	1	1	1	OOF_Stepglm[backward]+XGBoost
5	0	8	0	1	1	1	1	1	1	OOF_NaiveBayes
5	0	8	0	1	1	1	1	1	1	OOF_Lasso+NaiveBayes
5	0	8	0	1	1	1	1	1	1	OOF_glmBoost+NaiveBayes
5	0	8	0	1	1	1	1	1	1	OOF_Stepglm[both]+NaiveBayes
5	0	8	0	1	1	1	1	1	1	OOF_Stepglm[backward]+NaiveBayes
4	0	8	1	0.923076923076923	1	0.8	0.888888888888889	1	0.9	OOF_glmBoost
4	0	8	1	0.923076923076923	1	0.8	0.888888888888889	1	0.9	OOF_plsRglm
3	1	7	2	0.769230769230769	0.75	0.6	0.666666666666667	0.875	0.7375	OOF_RF+Stepglm[forward]
3	1	7	2	0.769230769230769	0.75	0.6	0.666666666666667	0.875	0.7375	OOF_RF+Stepglm[both]
3	1	7	2	0.769230769230769	0.75	0.6	0.666666666666667	0.875	0.7375	OOF_RF+Stepglm[backward]
1	0	8	4	0.692307692307692	1	0.2	0.333333333333333	1	0.6	OOF_RF+XGBoost
2	2	6	3	0.615384615384615	0.5	0.4	0.444444444444444	0.75	0.575	OOF_RF+plsRglm
2	2	6	3	0.615384615384615	0.5	0.4	0.444444444444444	0.75	0.575	OOF_RF+glmBoost
1	1	7	4	0.615384615384615	0.5	0.2	0.285714285714286	0.875	0.5375	OOF_RF+LDA
1	1	7	4	0.615384615384615	0.5	0.2	0.285714285714286	0.875	0.5375	OOF_RF+NaiveBayes
NA	NA	NA	NA	NA	NA	NA	NA	NA	NA	OOF_SVM
NA	NA	NA	NA	NA	NA	NA	NA	NA	NA	OOF_glmBoost+SVM
NA	NA	NA	NA	NA	NA	NA	NA	NA	NA	OOF_Ridge
NA	NA	NA	NA	NA	NA	NA	NA	NA	NA	OOF_Lasso+SVM
NA	NA	NA	NA	NA	NA	NA	NA	NA	NA	OOF_glmBoost+Ridge
NA	NA	NA	NA	NA	NA	NA	NA	NA	NA	OOF_Enet[alpha=0.1]
NA	NA	NA	NA	NA	NA	NA	NA	NA	NA	OOF_glmBoost+Enet[alpha=0.1]
NA	NA	NA	NA	NA	NA	NA	NA	NA	NA	OOF_Enet[alpha=0.2]
NA	NA	NA	NA	NA	NA	NA	NA	NA	NA	OOF_Enet[alpha=0.3]
NA	NA	NA	NA	NA	NA	NA	NA	NA	NA	OOF_glmBoost+Enet[alpha=0.3]
NA	NA	NA	NA	NA	NA	NA	NA	NA	NA	OOF_glmBoost+Enet[alpha=0.2]
NA	NA	NA	NA	NA	NA	NA	NA	NA	NA	OOF_Enet[alpha=0.4]
NA	NA	NA	NA	NA	NA	NA	NA	NA	NA	OOF_glmBoost+Enet[alpha=0.4]
NA	NA	NA	NA	NA	NA	NA	NA	NA	NA	OOF_Enet[alpha=0.5]
NA	NA	NA	NA	NA	NA	NA	NA	NA	NA	OOF_glmBoost+Enet[alpha=0.5]
NA	NA	NA	NA	NA	NA	NA	NA	NA	NA	OOF_Enet[alpha=0.6]
NA	NA	NA	NA	NA	NA	NA	NA	NA	NA	OOF_glmBoost+Enet[alpha=0.6]
NA	NA	NA	NA	NA	NA	NA	NA	NA	NA	OOF_glmBoost+Enet[alpha=0.7]
NA	NA	NA	NA	NA	NA	NA	NA	NA	NA	OOF_glmBoost+Enet[alpha=0.8]
NA	NA	NA	NA	NA	NA	NA	NA	NA	NA	OOF_Enet[alpha=0.8]
NA	NA	NA	NA	NA	NA	NA	NA	NA	NA	OOF_Enet[alpha=0.9]
NA	NA	NA	NA	NA	NA	NA	NA	NA	NA	OOF_Lasso
NA	NA	NA	NA	NA	NA	NA	NA	NA	NA	OOF_Enet[alpha=0.7]
NA	NA	NA	NA	NA	NA	NA	NA	NA	NA	OOF_glmBoost+Enet[alpha=0.9]
NA	NA	NA	NA	NA	NA	NA	NA	NA	NA	OOF_glmBoost+Lasso
NA	NA	NA	NA	NA	NA	NA	NA	NA	NA	OOF_RF+SVM
NA	NA	NA	NA	NA	NA	NA	NA	NA	NA	OOF_RF+Ridge
NA	NA	NA	NA	NA	NA	NA	NA	NA	NA	OOF_RF+Enet[alpha=0.1]
NA	NA	NA	NA	NA	NA	NA	NA	NA	NA	OOF_RF+Enet[alpha=0.2]
NA	NA	NA	NA	NA	NA	NA	NA	NA	NA	OOF_RF+Enet[alpha=0.3]
NA	NA	NA	NA	NA	NA	NA	NA	NA	NA	OOF_RF+Enet[alpha=0.6]
NA	NA	NA	NA	NA	NA	NA	NA	NA	NA	OOF_RF+Lasso
NA	NA	NA	NA	NA	NA	NA	NA	NA	NA	OOF_RF+Enet[alpha=0.7]
NA	NA	NA	NA	NA	NA	NA	NA	NA	NA	OOF_RF+Enet[alpha=0.4]
NA	NA	NA	NA	NA	NA	NA	NA	NA	NA	OOF_RF+Enet[alpha=0.8]
NA	NA	NA	NA	NA	NA	NA	NA	NA	NA	OOF_Stepglm[both]+Ridge
NA	NA	NA	NA	NA	NA	NA	NA	NA	NA	OOF_Stepglm[backward]+Ridge
NA	NA	NA	NA	NA	NA	NA	NA	NA	NA	OOF_Stepglm[both]+Enet[alpha=0.9]
NA	NA	NA	NA	NA	NA	NA	NA	NA	NA	OOF_Stepglm[backward]+Enet[alpha=0.9]
NA	NA	NA	NA	NA	NA	NA	NA	NA	NA	OOF_Stepglm[both]+Enet[alpha=0.1]
NA	NA	NA	NA	NA	NA	NA	NA	NA	NA	OOF_Stepglm[backward]+Enet[alpha=0.1]
NA	NA	NA	NA	NA	NA	NA	NA	NA	NA	OOF_Stepglm[both]+Enet[alpha=0.8]
NA	NA	NA	NA	NA	NA	NA	NA	NA	NA	OOF_Stepglm[backward]+Enet[alpha=0.8]
NA	NA	NA	NA	NA	NA	NA	NA	NA	NA	OOF_Stepglm[both]+Enet[alpha=0.2]
NA	NA	NA	NA	NA	NA	NA	NA	NA	NA	OOF_Stepglm[backward]+Enet[alpha=0.2]
NA	NA	NA	NA	NA	NA	NA	NA	NA	NA	OOF_Stepglm[both]+Lasso
NA	NA	NA	NA	NA	NA	NA	NA	NA	NA	OOF_Stepglm[backward]+Lasso
NA	NA	NA	NA	NA	NA	NA	NA	NA	NA	OOF_Stepglm[both]+Enet[alpha=0.6]
NA	NA	NA	NA	NA	NA	NA	NA	NA	NA	OOF_Stepglm[backward]+Enet[alpha=0.6]
NA	NA	NA	NA	NA	NA	NA	NA	NA	NA	OOF_Stepglm[both]+Enet[alpha=0.7]
NA	NA	NA	NA	NA	NA	NA	NA	NA	NA	OOF_Stepglm[backward]+Enet[alpha=0.7]
NA	NA	NA	NA	NA	NA	NA	NA	NA	NA	OOF_Stepglm[both]+Enet[alpha=0.4]
NA	NA	NA	NA	NA	NA	NA	NA	NA	NA	OOF_Stepglm[backward]+Enet[alpha=0.4]
NA	NA	NA	NA	NA	NA	NA	NA	NA	NA	OOF_Stepglm[both]+Enet[alpha=0.3]
NA	NA	NA	NA	NA	NA	NA	NA	NA	NA	OOF_Stepglm[backward]+Enet[alpha=0.3]
NA	NA	NA	NA	NA	NA	NA	NA	NA	NA	OOF_Stepglm[both]+Enet[alpha=0.5]
NA	NA	NA	NA	NA	NA	NA	NA	NA	NA	OOF_Stepglm[backward]+Enet[alpha=0.5]
NA	NA	NA	NA	NA	NA	NA	NA	NA	NA	OOF_Stepglm[both]+SVM
NA	NA	NA	NA	NA	NA	NA	NA	NA	NA	OOF_Stepglm[backward]+SVM
NA	NA	NA	NA	NA	NA	NA	NA	NA	NA	OOF_Stepglm[both]+Enet[alpha=0.8]+XGBoost
NA	NA	NA	NA	NA	NA	NA	NA	NA	NA	OOF_Stepglm[backward]+Enet[alpha=0.8]+glmBoost
NA	NA	NA	NA	NA	NA	NA	NA	NA	NA	OOF_Stepglm[both]+Enet[alpha=0.2]+GBM
NA	NA	NA	NA	NA	NA	NA	NA	NA	NA	OOF_Stepglm[backward]+Enet[alpha=0.2]+XGBoost
NA	NA	NA	NA	NA	NA	NA	NA	NA	NA	OOF_Stepglm[both]+Lasso+GBM
NA	NA	NA	NA	NA	NA	NA	NA	NA	NA	OOF_Stepglm[backward]+Lasso+RF
NA	NA	NA	NA	NA	NA	NA	NA	NA	NA	OOF_Stepglm[both]+Enet[alpha=0.6]+GBM
NA	NA	NA	NA	NA	NA	NA	NA	NA	NA	OOF_Stepglm[backward]+Enet[alpha=0.6]+GBM
NA	NA	NA	NA	NA	NA	NA	NA	NA	NA	OOF_Stepglm[both]+Enet[alpha=0.7]+GBM
NA	NA	NA	NA	NA	NA	NA	NA	NA	NA	OOF_Stepglm[backward]+Enet[alpha=0.7]+NaiveBayes

## Sheet: Table S10(CV_oof_predictions)
Table S10: CV_oof_predictions(Training set)
sample	Type	OOF_SVM	OOF_glmBoost+SVM	OOF_Ridge	OOF_Lasso+SVM	OOF_glmBoost+Ridge	OOF_Enet[alpha=0.1]	OOF_glmBoost+Enet[alpha=0.1]	OOF_Enet[alpha=0.2]	OOF_Enet[alpha=0.3]	OOF_glmBoost+Enet[alpha=0.3]	OOF_glmBoost+Enet[alpha=0.2]	OOF_Enet[alpha=0.4]	OOF_glmBoost+Enet[alpha=0.4]	OOF_Lasso+glmBoost	OOF_Enet[alpha=0.5]	OOF_glmBoost	OOF_glmBoost+Enet[alpha=0.5]	OOF_Enet[alpha=0.6]	OOF_glmBoost+Enet[alpha=0.6]	OOF_glmBoost+Enet[alpha=0.7]	OOF_glmBoost+Enet[alpha=0.8]	OOF_Enet[alpha=0.8]	OOF_Enet[alpha=0.9]	OOF_Lasso	OOF_Enet[alpha=0.7]	OOF_glmBoost+Enet[alpha=0.9]	OOF_glmBoost+Lasso	OOF_Lasso+plsRglm	OOF_glmBoost+plsRglm	OOF_glmBoost+Stepglm[forward]	OOF_Lasso+Stepglm[forward]	OOF_RF+SVM	OOF_Stepglm[forward]	OOF_plsRglm	OOF_RF+Ridge	OOF_RF+Enet[alpha=0.1]	OOF_RF+plsRglm	OOF_RF+Stepglm[forward]	OOF_RF+Enet[alpha=0.2]	OOF_RF+Enet[alpha=0.3]	OOF_RF+Enet[alpha=0.6]	OOF_RF+Lasso	OOF_RF+Enet[alpha=0.7]	OOF_RF+glmBoost	OOF_RF+Enet[alpha=0.4]	OOF_RF+Enet[alpha=0.8]	OOF_RF+Stepglm[both]	OOF_RF+Stepglm[backward]
GSM3660641	0														1.10881100546331e-05		0.00023014038046743												1.10881100546331e-05	0.000170104692208689	3.86727260620769e-11	4.52135119433183e-10		3.86727260620769e-11	0.00023014038046743			0.395495606941548	2.22044604925031e-16						0.391676899564083			2.22044604925031e-16	2.22044604925031e-16
GSM3660642	0														0.000293703195902103		0.00190807260049626												0.000293703195902103	0.00100013162801682	2.61617617448645e-06	2.31875749627711e-11		2.61617617448645e-06	0.00190807260049626			0.00308910313503732	2.22044604925031e-16						0.00120902537447525			2.22044604925031e-16	2.22044604925031e-16
GSM3660643	0														6.38882361175273e-05		0.000222365041888433												6.38882361175273e-05	0.000238854069907351	2.22044604925031e-16	3.23654777395399e-10		2.22044604925031e-16	0.000222365041888433			0.413922687576358	5.64994945543632e-05						0.420544607084139			5.64994945543632e-05	5.64994945543632e-05
GSM3660644	0														0.000474602503326967		0.0374865631035698												0.000474602503326967	0.00176178037791106	4.37322608767545e-07	4.37476736879891e-12		4.37322608767545e-07	0.0361458842562979			0.215807833196577	2.22044604925031e-16						0.191396950202767			2.22044604925031e-16	2.22044604925031e-16
GSM3660645	0														0.00288938114079682		0.00276279778306393												0.00288938114079682	0.00272864413296312	2.22044604925031e-16	3.20746837071045e-13		2.22044604925031e-16	0.00276279778306393			0.16471153682439	2.22044604925031e-16						0.244917430811003			2.22044604925031e-16	2.22044604925031e-16
GSM3660646	0														0.000147512605261933		0.00145296080449429												0.000147512605261933	0.000672398474995696	2.22044604925031e-16	2.22044604925031e-16		2.22044604925031e-16	0.00145296080449429			0.811887488389254	7.40042518039713e-11						0.7524332064187			7.40042518039713e-11	7.40042518039713e-11
GSM3660647	0														0.000128468890064778		0.00805301341400572												0.000128468890064778	0.00356226716922623	2.22044604925031e-16	2.22044604925031e-16		2.22044604925031e-16	0.0081688558555877			0.185716548814678	0.999988291603141						0.363636363636364			0.999988291603141	0.999988291603141
GSM3660648	0														0.00459502346913491		0.00979939000026751												0.00459502346913491	0.00245378717907662	4.33123507584049e-06	2.22044604925031e-16		4.33123507584049e-06	0.00945604135989875			0.733440880337461	2.22044604925031e-16						0.760037786548071			2.22044604925031e-16	2.22044604925031e-16
GSM3660652	1														0.999893970552748		0.971767760346914												0.999893970552748	0.995079603904892	1	0.999999998612937		1	0.971767760346914			0.428456108824613	0.999679320147474						0.397401402877837			0.999679320147474	0.999679320147474
GSM3660653	1														0.993763949480571		0.976674795511586												0.993763949480571	0.9987766247581	1	0.999999994326863		1	0.976674795511586			0.687234002884303	1						0.763422048777885			1	1
GSM3660654	1														0.999650775648027		0.999471169892646												0.999650775648027	0.9997072138389	1	0.999999999999901		1	0.999458391919037			0.41697991039005	4.23475432440209e-05						0.363636363636364			4.23475432440209e-05	4.23475432440209e-05
GSM3660655	1														0.998727099105909		0.292801550775637												0.998727099105909	0.918560044967638	1	0.999999999974832		1	0.292801550775637			0.262362110913786	2.22044604925031e-16						0.303401576565099			2.22044604925031e-16	2.22044604925031e-16
GSM3660656	1														0.999536181382703		0.998835076243938												0.999536181382703	0.999679218024219	0.999999999198354	0.999999999980906		0.999999999198354	0.998885659739398			0.866777097526194	1						0.880017666245326			1	1
[truncated: 56 more columns]

## Sheet: Table S10(CV_auc_by_method)
Table S10: CV_auc_by_method(Training set)
Method	CV_AUC
Lasso+glmBoost	1
glmBoost	1
Lasso+plsRglm	1
glmBoost+plsRglm	1
glmBoost+Stepglm[forward]	1
Lasso+Stepglm[forward]	1
Stepglm[forward]	1
plsRglm	1
Stepglm[both]+plsRglm	1
Stepglm[backward]+plsRglm	1
Stepglm[both]+glmBoost	1
Stepglm[backward]+glmBoost	1
LDA	1
glmBoost+LDA	1
Stepglm[both]+LDA	1
Stepglm[backward]+LDA	1
Lasso+LDA	1
XGBoost	1
Lasso+XGBoost	1
glmBoost+XGBoost	1
Stepglm[both]+XGBoost	1
Stepglm[backward]+XGBoost	1
NaiveBayes	1
Lasso+NaiveBayes	1
glmBoost+NaiveBayes	1
Stepglm[both]+NaiveBayes	1
Stepglm[backward]+NaiveBayes	1
RF+Stepglm[forward]	0.7875
RF+Stepglm[both]	0.7875
RF+Stepglm[backward]	0.7875
RF+plsRglm	0.75
RF+glmBoost	0.6875
RF+XGBoost	0.675
RF+NaiveBayes	0.625
RF+LDA	0.575
SVM
glmBoost+SVM
Ridge
Lasso+SVM
glmBoost+Ridge
Enet[alpha=0.1]
glmBoost+Enet[alpha=0.1]
Enet[alpha=0.2]
Enet[alpha=0.3]
glmBoost+Enet[alpha=0.3]
glmBoost+Enet[alpha=0.2]
Enet[alpha=0.4]
glmBoost+Enet[alpha=0.4]
Enet[alpha=0.5]
glmBoost+Enet[alpha=0.5]
Enet[alpha=0.6]
glmBoost+Enet[alpha=0.6]
glmBoost+Enet[alpha=0.7]
glmBoost+Enet[alpha=0.8]
Enet[alpha=0.8]
Enet[alpha=0.9]
Lasso
Enet[alpha=0.7]
glmBoost+Enet[alpha=0.9]
glmBoost+Lasso
RF+SVM
RF+Ridge
RF+Enet[alpha=0.1]
RF+Enet[alpha=0.2]
RF+Enet[alpha=0.3]
RF+Enet[alpha=0.6]
RF+Lasso
RF+Enet[alpha=0.7]
RF+Enet[alpha=0.4]
RF+Enet[alpha=0.8]
Stepglm[both]+Ridge
Stepglm[backward]+Ridge
Stepglm[both]+Enet[alpha=0.9]
Stepglm[backward]+Enet[alpha=0.9]
Stepglm[both]+Enet[alpha=0.1]
Stepglm[backward]+Enet[alpha=0.1]
Stepglm[both]+Enet[alpha=0.8]
Stepglm[backward]+Enet[alpha=0.8]
Stepglm[both]+Enet[alpha=0.2]
Stepglm[backward]+Enet[alpha=0.2]
Stepglm[both]+Lasso
Stepglm[backward]+Lasso
Stepglm[both]+Enet[alpha=0.6]
Stepglm[backward]+Enet[alpha=0.6]
Stepglm[both]+Enet[alpha=0.7]
Stepglm[backward]+Enet[alpha=0.7]
Stepglm[both]+Enet[alpha=0.4]
Stepglm[backward]+Enet[alpha=0.4]
Stepglm[both]+Enet[alpha=0.3]
Stepglm[backward]+Enet[alpha=0.3]
Stepglm[both]+Enet[alpha=0.5]
Stepglm[backward]+Enet[alpha=0.5]
Stepglm[both]+SVM
Stepglm[backward]+SVM
Stepglm[both]+Enet[alpha=0.8]+XGBoost
Stepglm[backward]+Enet[alpha=0.8]+glmBoost
Stepglm[both]+Enet[alpha=0.2]+GBM
Stepglm[backward]+Enet[alpha=0.2]+XGBoost
Stepglm[both]+Lasso+GBM
Stepglm[backward]+Lasso+RF
Stepglm[both]+Enet[alpha=0.6]+GBM
Stepglm[backward]+Enet[alpha=0.6]+GBM
Stepglm[both]+Enet[alpha=0.7]+GBM
Stepglm[backward]+Enet[alpha=0.7]+NaiveBayes
