# Supplementary material
Source: Research Square preprint supplement (doi:10.21203/rs.3.rs-9392286/v1)
Supplement: Supplementary file 12 [file 80f6fc135be9822fd68a2199.xlsx]

## Sheet: Table S4(MM_GS_allcelltype)
Table S4: a cross–cell type list of core genes that represent putative key regulators of IPF-related co-expression programs
Celltype	Gene	Module	MM	p.MM	GS	p.GS
Endothelial	TNR	green	0.98941076349471	1.10729390229258e-37	0.116170620280133	0.447287357299402
Endothelial	C5ORF17	green	0.97898746157136	2.50207194875146e-31	0.122901891647953	0.421219853722205
Endothelial	MT-ND2	green	-0.942487	4.38423550467857e-22	-0.0339807	0.824625998143897
Endothelial	FTL	green	-0.97974	1.1507091418823e-31	-0.226998	0.133729892326168
Endothelial	MT-ATP6	green	-0.944449	2.11997027483775e-22	-0.00355983	0.981484280336727
Endothelial	XIST	green	-0.151453	0.320644115195727	-0.049572	0.746407097108376
Endothelial	SFTPB	green	0.963183367755123	3.68832500496563e-26	-0.0266537	0.862024223685423
Endothelial	MT-CO3	green	-0.947901	5.52623215706279e-23	0.00031488781396545	0.998362033148332
Endothelial	IGLC2	purple	0.879167054588669	1.96362407727299e-15	0.0567440725620341	0.711205324208125
Endothelial	MT-CO1	green	-0.942587	4.2273343004795e-22	0.00491237274712798	0.974451273801918
Endothelial	FTH1	purple	0.969128053371284	8.87552038296085e-28	-0.21613	0.153880177101164
Endothelial	TMEM190	green	-0.882553	1.10392575901283e-15	0.00529383155143432	0.972468079658304
Endothelial	MT-CO2	green	-0.942489	4.38070952841607e-22	-0.0284529	0.852810045221733
Endothelial	HBA2	purple	0.872336341920883	5.96642376907756e-15	-0.254329	0.0918089638186242
Endothelial	UTY	green	0.248869149756047	0.0992422617019367	0.198391815673336	0.191405544250824
Endothelial	NEAT1	magenta	0.986065844323672	3.91830621845695e-35	0.111379796968403	0.4663661473275
Endothelial	SAA1	purple	0.833233556547085	1.23673925615042e-12	-0.0681267	0.656562220796142
Endothelial	MT-CYB	green	-0.900762	3.55940687958375e-17	0.016910231802187	0.912208781948743
Endothelial	SAT1	green	0.981876021592568	1.07117637117455e-32	0.116044220738173	0.447785160236457
Endothelial	RPL21	purple	0.984635400125061	3.15824165060033e-34	-0.155132	0.308890655895895
Endothelial	MT-ND4	green	-0.907841	7.79527058731877e-18	0.00703124411477375	0.963437572230802
Endothelial	RPS17	purple	0.985232424241011	1.35501334533576e-34	-0.113437	0.458121410015069
Endothelial	SPP1	purple	0.747935088455288	3.53443214707482e-09	0.211921246114001	0.16225181784106
Endothelial	MMP7	green	-0.747713	3.59322224433141e-09	0.351851387214368	0.0177776828749326
Endothelial	GCHFR	purple	0.952932329578063	6.54576031819176e-24	-0.150883	0.322491636381795
Endothelial	NALCN	green	0.945329216440467	1.51721574626806e-22	0.117052082726498	0.443824320734604
Endothelial	RPS5	purple	0.98094884908116	3.10268940468229e-32	-0.146897	0.335585435991596
Endothelial	TMSB4X	purple	0.974523205858864	1.50636444303302e-29	-0.154671	0.310348145432656
Endothelial	RPS10	purple	0.979407056518771	1.62839521584857e-31	-0.121546	0.426402238838296
Endothelial	CFD	green	-0.958409	4.83875429631528e-25	-0.144441	0.34381666409578
Endothelial	MT-ND1	green	-0.91355	2.08964041564438e-18	-0.0315113	0.837192075951297
Endothelial	RPL7	purple	0.975742376182139	5.31252117434458e-30	-0.138665	0.363659613334591
Endothelial	PRKG1	green	0.960265451616169	1.84657208622239e-25	0.0775825698385253	0.612464238974515
Endothelial	KRT17	black	0.885576387483733	6.50089065167364e-16	0.320567033200659	0.0317987018670867
Endothelial	RPS18	purple	0.978105116267529	6.00603550464128e-31	-0.123298	0.419712736188999
Endothelial	RPL23A	purple	0.983354564204339	1.74419864781217e-33	-0.127612	0.403501297110501
Endothelial	RPL13A	purple	0.982480866552099	5.19427979504988e-33	-0.124017	0.41698745931053
Endothelial	RPL27A	purple	0.981377939913932	1.90927865718642e-32	-0.136423	0.371541419359183
Endothelial	ANO2	green	0.976420782344864	2.90644972171837e-30	0.174093218473083	0.252727537695378
Endothelial	JCHAIN	purple	0.881776288423862	1.26171800534027e-15	0.0723866164730134	0.636541042004754
Endothelial	RPS4X	purple	0.977261135105997	1.3431443429061e-30	-0.115514	0.449877239842409
Endothelial	TTTY14	green	0.308612792638846	0.0391479656129532	0.274803954953862	0.0677123333438189
Endothelial	RPS20	purple	0.982338005722047	6.17654723117557e-33	-0.138703	0.363524198157566
Endothelial	AFF3	green	0.924746587420427	1.18681448680594e-19	-0.0429569	0.779336311438446
Endothelial	USP9Y	green	0.249151101552191	0.0988474178809296	0.201607043066196	0.184162375070447
Endothelial	KDM5D	green	0.0327873519815817	0.830693377450899	0.206225047838032	0.174104775253959
Endothelial	COX8A	purple	0.94940206092744	2.99169416247687e-23	-0.0790679	0.605653663175036
Endothelial	NDUFA4	purple	0.976015381880699	4.1763107170671e-30	-0.127648	0.403369219144998
Endothelial	RPS27A	purple	0.979357064119049	1.71468919031866e-31	-0.11896	0.436378751716518
Endothelial	RPL39	purple	0.950572112829673	1.83043466741118e-23	-0.0360688	0.814034222133829
Endothelial	DDX3Y	green	-0.124213	0.416243223662685	0.104017289966447	0.49651588426177
Endothelial	IGHG3	purple	0.837049109072783	7.82910890769551e-13	0.0805037372557321	0.599101295796527
Endothelial	TUBA1B	purple	0.967316903212464	2.96960220617341e-27	-0.125168	0.412641330988748
Endothelial	RPL18A	purple	0.977534276431868	1.03862017608514e-30	-0.156831	0.30355813115165
Endothelial	NTM	blue	0.659637046891961	8.29184414768853e-07	0.0933268512002908	0.542013224452608
Endothelial	ST6GALNAC3	blue	0.977098737381128	1.56269230123629e-30	0.0849006247492484	0.579232045716952
Endothelial	RPL29	purple	0.974937664400148	1.06307553251102e-29	-0.122621	0.422291194346363
Endothelial	RPS23	green	-0.97372	2.91197943959595e-29	-0.106662	0.485573561374221
Endothelial	FAU	purple	0.971332377153684	1.84499421792902e-28	-0.147255	0.334396446653926
Endothelial	UBA52	purple	0.986173914792735	3.3178770539162e-35	-0.138735	0.363414570784501
Endothelial	ALDOA	purple	0.984008502360985	7.4159859785144e-34	-0.198913	0.190218339116139
Endothelial	MAGI1	magenta	0.974646889831973	1.35838034371401e-29	0.191482676960669	0.207648962603419
Endothelial	FBXL7	magenta	0.974293859199654	1.82231367426489e-29	0.210045218368406	0.166088806088746
Endothelial	RPL34	purple	0.96848490634321	1.37385845693441e-27	-0.107532	0.481998181339208
Endothelial	FTX	magenta	0.987545171860354	3.56005364575678e-36	0.192561860587364	0.205050225064626
Endothelial	DDX5	green	0.983540438121041	1.37258522100952e-33	0.113588714280708	0.457515787402038
Endothelial	RPL19	purple	0.975089643873955	9.34164997296372e-30	-0.139501	0.36074510844625
Endothelial	PLA2G2A	purple	0.825515203378576	3.01388633211842e-12	-0.143739	0.346190541882301
Endothelial	RPS15A	purple	0.973840823807265	2.6411754479096e-29	-0.109262	0.474936485481768
Endothelial	IGHA1	purple	0.762098275395167	1.19164747910788e-09	0.120439067691438	0.430656068237797
Endothelial	RPL12	purple	0.985719179940034	6.62327322613104e-35	-0.135472	0.374917865620231
Endothelial	SFRP2	purple	0.7962017095511	6.20428849857295e-11	0.283590182477096	0.0590516604578614
Endothelial	RPS13	purple	0.978083938184597	6.1308991693518e-31	-0.143477	0.347081319544083
Endothelial	RPS12	green	-0.970152	4.3403349876196e-28	-0.138378	0.364662598342471
Endothelial	LRRFIP1	green	0.985184874235645	1.45129878032879e-34	0.127041213225521	0.405626845604812
Endothelial	TPPP3	purple	0.94712833362226	7.52400679378253e-23	0.0627187935735388	0.682323616800696
Endothelial	DYNLL1	purple	0.976118757177444	3.80983278374391e-30	-0.0424377	0.781937790783832
Endothelial	LINC00278	green	0.190300245537063	0.21052268505779	0.202303823201356	0.182618850614508
Endothelial	B2M	green	-0.97091	2.51583801863739e-28	-0.146819	0.335845728276281
Endothelial	MACROD2	blue	0.911573952590826	3.32912391004703e-18	-0.0791188	0.605420794983878
Endothelial	NCKAP5	green	0.890111840900229	2.85539510495873e-16	-0.0586011	0.702183123294017
Endothelial	RPL35A	green	-0.980671	4.22279068871112e-32	-0.127873	0.40253421169934
Endothelial	RPL27	purple	0.986216441233276	3.10654894184548e-35	-0.129218	0.397561498378694
Endothelial	FAM183A	purple	0.828803621648517	2.07327664884413e-12	0.0704138051732736	0.645782257377345
Endothelial	MUC5AC	black	0.768698054664273	6.99650502899136e-10	0.182584345193029	0.229957115160732
Endothelial	PALM2-AKAP2	magenta	0.975581084731523	6.11626411545709e-30	0.0999764476648486	0.513479075724769
Endothelial	PHLDA2	purple	0.929071011661478	3.47386158250913e-20	-0.0912098	0.55125507816044
Endothelial	UQCRB	purple	0.970361302178491	3.73988507124677e-28	-0.0742024	0.628083293808748
Endothelial	DBI	purple	0.973199372733425	4.41808860714163e-29	-0.190594	0.209805405328907
Endothelial	RPLP1	purple	0.959260803761255	3.12724733988481e-25	-0.107708	0.481277015123422
Endothelial	BPIFB1	turquoise	0.858034836413385	5.03903909465971e-14	0.468971665070078	0.00115602918814581
Endothelial	RPL36AL	purple	0.985585911572769	8.07669689424431e-35	-0.167156	0.272419240436026
Endothelial	S100P	purple	0.86785962165612	1.19477780167887e-14	-0.0506768	0.740948999860572
Endothelial	CCL2	purple	0.866617566300509	1.44217854996009e-14	-0.000813422	0.995768798762375
Endothelial	RPL32	purple	0.977076375175132	1.59547659643268e-30	-0.129623	0.396071742177013
Endothelial	COX6A1	green	-0.97426	1.87461931251801e-29	-0.109356	0.474553282355239
Endothelial	RPS4Y1	green	0.106674995065778	0.485518312522927	0.190745852231374	0.209436463600639
Endothelial	RPS6	purple	0.972608909412325	7.01738034758136e-29	-0.115118	0.451443261951553
Endothelial	DLG2	green	0.968852657398179	1.0713482202615e-27	0.0625740463540878	0.683018241777821
Endothelial	PTPRG	green	0.975538397949432	6.34762063877648e-30	0.14418026525794	0.344697990795722
Endothelial	KALRN	blue	0.964071988421936	2.20059114975544e-26	0.203428505009204	0.180146983001932
Endothelial	HIGD2A	purple	0.964939615221059	1.31230933905972e-26	-0.157235	0.302299288874108
Endothelial	RPL26	purple	0.972855063736127	5.79354839314216e-29	-0.119603	0.433885497227506
Endothelial	FAM155A	green	0.912667649259827	2.57613363102483e-18	0.342098965213581	0.0214381808720854
Endothelial	SAP18	purple	0.96712171471943	3.36863113159202e-27	-0.142378	0.35082696269148
Endothelial	COX7C	purple	0.973828408389284	2.66792945632704e-29	-0.126432	0.407898816602488
Endothelial	RPS15	purple	0.984639358298704	3.14091767164204e-34	-0.12226	0.423669699790125
Endothelial	MUC5B	turquoise	0.89024738388807	2.78451076959212e-16	0.603089312946545	1.16208713253298e-05
Endothelial	KHDRBS2	green	0.946074413026115	1.13801795330917e-22	0.0583396223790147	0.703451234334918
Endothelial	EVI2A	green	-0.943684	2.82266529174244e-22	-0.247945	0.10054450872432
Endothelial	EIF1AY	green	-0.514802	0.000296688901747739	-0.0396945	0.795721803780112
Endothelial	KRT5	black	0.853518642094623	9.42311883303815e-14	0.31514833586495	0.0349746123698584
Endothelial	ZNF385B	greenyellow	0.850285340906895	1.4564842510022e-13	-0.268933	0.0740405170985552
Endothelial	HBB	purple	0.459159510436095	0.00151049658786199	-0.504358	0.000411401974816802
Endothelial	RPS27	purple	0.981892825178683	1.05019989171181e-32	-0.19042	0.21023109372261
Endothelial	MT1A	purple	0.756183499512752	1.8932247542235e-09	-0.0931442	0.542807649432642
Endothelial	SLC25A5	purple	0.962521984233659	5.37299576189179e-26	-0.194835	0.199651742987151
Endothelial	LUM	purple	0.856475791714547	6.26954386134718e-14	0.0795027306068014	0.603666064348714
Endothelial	NRG3	green	0.950236224837681	2.11022900086745e-23	0.0793978804034594	0.60414507106338
Endothelial	GPC5	green	0.942892339959375	3.78093352001145e-22	0.00246966454335484	0.987153955706025
Endothelial	FOLR1	purple	0.908540042716562	6.66595300842799e-18	-0.235975	0.118629277487767
Endothelial	ADGRL2	green	0.935219803311404	5.26143831329763e-21	0.125503521167421	0.411380158769397
Endothelial	RPL8	purple	0.981689307268649	1.3327899160264e-32	-0.152749	0.31647439214622
Endothelial	MT-ND5	green	-0.891202	2.33032440109854e-16	0.038656946377927	0.800951721030632
Endothelial	MECOM	blue	0.968021120247522	1.87218981564135e-27	0.196046326697159	0.196815381470404
Endothelial	CXCL10	purple	0.751932938726548	2.61953953293492e-09	0.133935153110963	0.380409087631853
Endothelial	SFTPC	greenyellow	0.728915064138159	1.36695775797003e-08	-0.249006	0.0990502237800512
Endothelial	RPS3	green	-0.985425	1.02359813314679e-34	-0.149526	0.326912595108668
Endothelial	COX6B1	purple	0.979818701909869	1.05922143798914e-31	-0.123336	0.419567677259374
Endothelial	NDUFA1	purple	0.976459977606109	2.8054154688694e-30	-0.137146	0.368987828855508
Endothelial	RPS3A	green	-0.984718	2.81361603420962e-34	-0.139463	0.360875574837684
Endothelial	SOX5	green	0.95637751998268	1.32178399078784e-24	0.171407644571797	0.26023428587485
Endothelial	PRDX1	purple	0.97724259111759	1.36664163571596e-30	-0.16477	0.279422151310673
Endothelial	ISG15	purple	0.942428187964145	4.47873492738545e-22	-0.021322	0.889432050206282
Endothelial	SORBS1	green	0.933507537530964	9.06136272864569e-21	0.061576931432629	0.687810290274368
Endothelial	S100A6	purple	0.959428650961899	2.86642181642227e-25	-0.131026	0.390935777284588
Endothelial	SDF2L1	purple	0.951892255023027	1.03638622820615e-23	-0.108437	0.4782996953324
Endothelial	PLCB1	green	0.945886587089883	1.22404062318676e-22	0.290726976103372	0.0526900366694018
Endothelial	CYCS	green	-0.972465	7.84114041906072e-29	-0.22295	0.140991184405909
Endothelial	RPL9	purple	0.982294900229769	6.50611358263789e-33	-0.129909	0.395021656167735
Endothelial	NDUFB3	green	-0.974592	1.42173481999448e-29	-0.109011	0.475959246108841
Endothelial	RPLP2	purple	0.98042615639952	5.52363949393132e-32	-0.119707	0.433485258686702
Endothelial	MT1X	purple	0.849090194168952	1.70643489013056e-13	-0.192039	0.206307300051009
Endothelial	RPS29	purple	0.983085662018717	2.45515934770036e-33	-0.108669	0.477353179366062
Endothelial	RBMS3	blue	0.98236302226614	5.99264051938703e-33	0.141566139258919	0.35360760947507
Endothelial	PARD3B	magenta	0.968218339112492	1.64224564930522e-27	0.0947313348515338	0.535923476885794
Endothelial	CHCHD2	purple	0.977410032728457	1.16793681077571e-30	-0.149808	0.325991256204566
Endothelial	LINC00472	green	0.954007578120463	4.02578385237997e-24	0.117356155865603	0.442633132173056
Endothelial	SH3RF3	green	0.956066136455988	1.53540616452057e-24	0.26178628637787	0.0823631062543563
Endothelial	PMAIP1	purple	0.897632107003575	6.71992157676247e-17	-0.0891573	0.560285695684568
Endothelial	MT-ND3	green	-0.799276	4.62540061298569e-11	0.115656480437768	0.449314102093262
Endothelial	KRT10	purple	0.947311669552253	6.99542817280102e-23	-0.0492066	0.748215275713307
Endothelial	LTB	purple	0.91812364701847	6.80383251374082e-19	-0.0421297	0.783482156986197
Endothelial	CXCL8	purple	0.789774993087783	1.12826554227225e-10	-0.172778	0.256385349352567
Endothelial	IGHG1	purple	0.77250131615007	5.10664592782335e-10	0.179070249349305	0.239203760839699
Endothelial	GALNT18	green	0.96667748350221	4.47559001030836e-27	0.115989105586844	0.448002316861878
Endothelial	RPL13	purple	0.987910129913732	1.88504399962653e-36	-0.1312	0.390302622357419
Endothelial	PTP4A1	green	-0.891927	2.03376800150125e-16	0.0501202203281831	0.74369734423881
Endothelial	RPL38	purple	0.981101713827247	2.61318485529576e-32	-0.0964609	0.528469985339575
Endothelial	PTPRM	magenta	0.98836236777691	8.34218997915183e-37	0.110755252942676	0.468884993215897
Endothelial	RPL30	purple	0.975929613640836	4.50561780012642e-30	-0.124156	0.41646163105233
Endothelial	BTBD9	magenta	0.972352482428253	8.55218146380016e-29	0.121294335377469	0.427365812344999
Endothelial	CADPS2	magenta	0.961142213870402	1.15298668381611e-25	0.147190408857674	0.334611464715974
Endothelial	VMO1	green	-0.927394	5.64522424109325e-20	-0.0230541	0.880512364384855
Endothelial	RPL24	purple	0.975917444616318	4.55429749192114e-30	-0.131088	0.390710585923321
Endothelial	MRPL23	purple	0.940806859917637	8.00554575898776e-22	-0.189176	0.213280585721561
Endothelial	TSPAN19	purple	0.761941436969186	1.20657234740441e-09	0.207705353531624	0.170966177956985
Endothelial	ARL15	green	0.95353534544712	4.99093069343657e-24	0.20872824283962	0.168821424127457
Endothelial	RPL23	purple	0.981257187909565	2.19130245995915e-32	-0.123844	0.417640386459251
Endothelial	SHANK3	green	0.975823009791745	4.94946252566725e-30	0.179156001262221	0.238975154395188
Endothelial	RPL11	purple	0.979307136974999	1.80520724856552e-31	-0.129924	0.394966091203063
Endothelial	SRP14	purple	0.968475201665423	1.38284968968031e-27	-0.1055	0.490366263154011
Endothelial	GADD45GIP1	purple	0.98494083505816	2.05714958621238e-34	-0.0971155	0.5256625539205
Endothelial	ROS1	green	0.916556816541633	1.00652059680475e-18	-0.0644413	0.674077467526354
Endothelial	CELF2	green	0.955464458080822	2.04464938358541e-24	-0.00972928	0.949423402493345
Endothelial	TRMT112	purple	0.979488032548469	1.49733405969522e-31	-0.130379	0.393300752770157
Endothelial	SF3B5	purple	0.984276551529774	5.1698592400583e-34	-0.116744	0.445033638481371
Endothelial	HSPA1B	purple	0.696013946037497	1.10764598892059e-07	-0.0567107	0.711367706170427
Endothelial	PDE4D	blue	0.960431030997971	1.69080055004125e-25	0.0867448387422472	0.570987994580993
Endothelial	IGHM	purple	0.773237457228247	4.80137049163781e-10	0.121954517100067	0.424835751647296
Endothelial	GAPDH	purple	0.979122318958959	2.18152081587587e-31	-0.126605	0.407253460110486
Endothelial	RPL18	purple	0.981604265356481	1.47116930402529e-32	-0.144459	0.343755274516988
Endothelial	MS4A8	black	0.924037160464927	1.4416811435438e-19	0.224561209183983	0.138067283329481
Endothelial	SNTN	purple	0.802441356465218	3.40061678306872e-11	0.167694063895029	0.270857432553916
Endothelial	POLR2K	purple	0.952018430448287	9.80728087329746e-24	-0.148138	0.331475946834173
Endothelial	GPR183	green	-0.930114	2.55325007370774e-20	-0.197094	0.194386759092634
Endothelial	MAGI2	blue	0.974548146725915	1.47533963912754e-29	0.149844936558064	0.325870502507022
Endothelial	RPS16	purple	0.979197636682765	2.01993240442092e-31	-0.122783	0.421673849539717
Endothelial	MAGI3	green	0.942422693738411	4.48768534244119e-22	0.0858020337881803	0.575195811593828
Endothelial	DUSP1	green	0.955343202842585	2.16511091915044e-24	0.0439319123802671	0.774457251490854
Endothelial	TUBB2A	purple	0.937090483136974	2.85558092562951e-21	-0.0708997	0.64350138210254
Endothelial	WWOX	magenta	0.974866424395018	1.1291753557115e-29	0.157575931928256	0.301238118663646
Endothelial	PSENEN	purple	0.977733096615842	8.59624220027819e-31	-0.0512678	0.738034598344933
Endothelial	RTN4	green	0.97439022021664	1.68256011700167e-29	0.0771510945137116	0.614448756891854
Endothelial	LAMTOR2	purple	0.969277539735931	8.00785682183916e-28	-0.0669501	0.662134811737531
Endothelial	RPL31	purple	0.978615693725194	3.63463453913883e-31	-0.120917	0.428813992235943
Endothelial	THSD4	blue	0.952654099182203	7.40940843199289e-24	0.160956731009213	0.290852721134635
Endothelial	TTN	green	0.873716803149245	4.79105391802012e-15	-0.196067	0.196767218679251
Endothelial	RPL10	purple	0.985476022547178	9.49901302250697e-35	-0.147031	0.335142593534145
Endothelial	MRPL51	purple	0.971634695957126	1.47335324445577e-28	-0.0801206	0.600846478753361
Endothelial	COMMD6	purple	0.969213517749958	8.36908010937309e-28	-0.0474325	0.757011554116508
Endothelial	DYNLRB1	purple	0.98374631843452	1.04928007624679e-33	-0.0973223	0.524777325819619
Endothelial	HECW2	brown	0.870997217924384	7.36370599122317e-15	0.0928969069983098	0.543884067095467
Endothelial	MUC16	turquoise	0.887254312232215	4.81463612861414e-16	0.453323297663126	0.00176441010508753
Endothelial	SNTG2	yellow	0.933499431145565	9.08439972156765e-21	0.324693817078836	0.0295432837827905
Endothelial	CARD16	purple	0.889332525166088	3.29731808071264e-16	-0.0403993	0.792174469073707
Endothelial	EEF1A1	green	-0.970178	4.26282144225106e-28	-0.123731	0.418069235822253
Endothelial	ZFPM2	blue	0.968139549719099	1.73068244728153e-27	0.209525168534746	0.167164007803203
Endothelial	MRPL54	purple	0.969711761695154	5.92211778708431e-28	-0.101235	0.508165360685197
Endothelial	BCL2A1	purple	0.936321504029519	3.67933545060967e-21	-0.237054	0.116904096664185
Endothelial	PARD3	blue	0.964244288989244	1.98791408039198e-26	0.116000290654908	0.4479582424321
Endothelial	SDS	green	-0.778712	3.0137739875628e-10	0.0476873106728287	0.755746419829229
Endothelial	RPL3	purple	0.977118778085431	1.53385754192077e-30	-0.117871	0.440621140071407
Endothelial	NDUFB11	purple	0.97409024348994	2.15484137890226e-29	-0.141227	0.354774301934188
Endothelial	UBC	green	0.947123094272278	7.53965686967931e-23	0.100203427891041	0.512518576091345
Endothelial	LDB2	green	0.968418621413552	1.43639621909525e-27	0.221825411168453	0.143059630693137
Endothelial	RPL28	purple	0.982402747251317	5.71128382650408e-33	-0.0941054	0.538633164823933
Endothelial	BTF3	purple	0.977473179984654	1.10040598628313e-30	-0.127177	0.405121817846478
Endothelial	UQCR10	purple	0.975505034558647	6.53422408656629e-30	-0.115865	0.448492770634333
Endothelial	ZFY	green	-0.0452347	0.767951195726704	0.202738338152967	0.181660998351988
Endothelial	PLEKHG1	green	0.943520227489329	2.99992632607294e-22	0.239801550398238	0.11259904219664
Endothelial	RPL14	purple	0.98080998053021	3.62207656556121e-32	-0.158107	0.299590575182574
Endothelial	LCN2	purple	0.76081272967509	1.31927176167087e-09	0.0900888784598521	0.556178444916723
Endothelial	SDK1	green	0.937989155079865	2.11486529810714e-21	0.111209138120657	0.467053710466742
Endothelial	CD48	purple	0.925565211310063	9.45928876531616e-20	-0.0770641	0.614849350314571
Endothelial	S100A2	black	0.845079996705315	2.87499392234894e-13	0.285796231755143	0.0570227831976403
Endothelial	RGS2	green	-0.935886	4.24117485791393e-21	-0.197624	0.193164553027195
Endothelial	CLEC4E	purple	0.846509481314492	2.3912240501165e-13	-0.393152	0.00754777144906986
Endothelial	RAC2	purple	0.951320674756397	1.32837427634868e-23	-0.158077	0.299685563039063
Endothelial	RPL35	purple	0.984865067969153	2.28982561105392e-34	-0.13054	0.392708666398554
Endothelial	RPL37A	purple	0.974835485398393	1.15908497078633e-29	-0.101555	0.506819298110001
Endothelial	TPT1	purple	0.973408752412855	3.74026033589335e-29	-0.097979	0.521970180839085
Endothelial	RPL10A	purple	0.989858729399641	4.39110241538027e-38	-0.135547	0.374651152334506
Endothelial	UBB	green	-0.943942	2.56442210833827e-22	-0.0826781	0.589238205414022
Endothelial	MT-ND6	green	-0.866211	1.53312435708563e-14	0.0800485421035814	0.601175196345543
Endothelial	C9ORF24	green	-0.926362	7.56582325992119e-20	-0.0325114	0.832097736633076
Endothelial	ANXA2	green	0.981242678282586	2.22774618973916e-32	0.132129758808948	0.386921580762687
Endothelial	ANKRD1	greenyellow	0.170885236645098	0.261711638068917	-0.499462	0.000477824725412203
Endothelial	NRXN3	green	0.959570709957608	2.66197600789885e-25	0.172963872136215	0.255866369057654
Endothelial	CSMD1	green	0.91044980214508	4.31818590619081e-18	0.0674467937174553	0.659780091719497
Endothelial	RPS9	purple	0.983207134430199	2.10523832580382e-33	-0.175027	0.250150885117893
Endothelial	FN1	green	0.961570168916594	9.12581363560968e-26	0.0943555199458997	0.537549722929162
Endothelial	PIFO	green	-0.914044	1.85682879569623e-18	-0.0635862	0.678166433610792
Endothelial	TTC28	magenta	0.968304978050853	1.54996949338963e-27	0.255811991503302	0.0898668932202391
Endothelial	RAD51B	blue	0.958261284731066	5.21375934197345e-25	0.190376915752796	0.21033551243639
Endothelial	NR3C2	magenta	0.976533872974733	2.62396278758512e-30	0.107538593482716	0.481972332506305
Endothelial	AUTS2	green	0.957909242307157	6.22370479310854e-25	0.070563937131922	0.645077116206461
Endothelial	RPL6	purple	0.98194139491256	9.91746508776572e-33	-0.127979	0.40214259535391
Endothelial	LAMTOR5	green	-0.982294	6.51582464185795e-33	-0.195105	0.199015908349888
Endothelial	RPS7	purple	0.981249415024081	2.21075433236052e-32	-0.12972	0.395713837641503
Endothelial	CCSER1	green	0.955057973351247	2.47565813729894e-24	0.142615700973361	0.350013699458364
Endothelial	PDE10A	green	0.931727004415935	1.57081142047725e-20	0.277969082824668	0.0644832421959363
Endothelial	MFAP4	green	-0.846954	2.25731395574636e-13	0.0386563001141003	0.800954981238799
Endothelial	COX7B	purple	0.980761074328887	3.82396469795956e-32	-0.153601	0.313749838370891
Endothelial	KIAA1217	blue	0.945100180989122	1.65608913328921e-22	0.184016908212065	0.22625892838759
Endothelial	SOD1	purple	0.977603859413261	9.72278010587544e-31	-0.0849531	0.578996647312937
Endothelial	RPS28	purple	0.985367895323972	1.11294054065862e-34	-0.111195	0.467109837351631
Endothelial	TOMM22	purple	0.959986507050976	2.14031925985636e-25	-0.0925461	0.545412923725831
Endothelial	ANAPC11	purple	0.978045450185819	6.36417643986627e-31	-0.125103	0.412885084651432
Endothelial	PRELID1	purple	0.970631145946495	3.08050062867855e-28	-0.13567	0.374213316405073
Endothelial	ACOXL	green	0.872270563693549	6.0287425454047e-15	-0.14707	0.335012477350948
Endothelial	PREX2	green	0.958397169691811	4.86734306781404e-25	0.252646582037202	0.0940522191532854
Endothelial	TXNDC17	purple	0.965323499239421	1.03966954535791e-26	-0.138976	0.362571445229613
Endothelial	GPHN	blue	0.965026081869404	1.24552848021601e-26	0.0580002491661603	0.705098070424556
Endothelial	SNRPD2	purple	0.977060122411783	1.61971407311999e-30	-0.129567	0.396277382543055
Endothelial	CHST9	turquoise	0.85207306842157	1.1462981895778e-13	0.511243659043138	0.000332034874624366
Endothelial	RGS10	green	-0.974154	2.0450710727309e-29	-0.106417	0.486582076214898
Endothelial	DOCK4	magenta	0.979119724618619	2.18730043554867e-31	0.113047856606456	0.459674366035237
Endothelial	C19ORF53	purple	0.986244203684736	2.97557630157855e-35	-0.0963658	0.528878797862382
Endothelial	TFF3	purple	0.867478607007403	1.2660378734876e-14	0.1188732140135	0.43671656939694
Endothelial	STARD13	green	0.950533221770674	1.86092518896525e-23	0.169588302974449	0.265403453669134
Endothelial	ZNF385D	yellow	0.927129324942734	6.08759783284483e-20	0.464498900702979	0.00130719436736997
Endothelial	SEC61G	purple	0.980377812930337	5.82171213047415e-32	-0.126543	0.407484098971748
Endothelial	RALGAPA2	blue	0.971834355083121	1.26826746092731e-28	0.188123067225556	0.215886349317802
Endothelial	NXN	green	0.956384593069858	1.31727691505728e-24	0.22149073549809	0.143679408064157
Endothelial	HSPE1	green	-0.932018	1.43724388880765e-20	-0.085401	0.576990125099773
Endothelial	TMEM160	purple	0.966654343138719	4.54184455636079e-27	-0.141871	0.352561042518066
Endothelial	TOMM7	purple	0.974419412228099	1.64227830203473e-29	-0.0891891	0.560145424453008
Endothelial	TSTD1	purple	0.909450351483157	5.42627625495652e-18	-0.159503	0.295290127158362
Endothelial	RPS25	purple	0.984448521821456	4.08816857858081e-34	-0.17236	0.257554554601396
Endothelial	AGAP1	magenta	0.979705455888576	1.19330068969584e-31	0.246522530628892	0.102575710590055
Endothelial	PRICKLE2	green	0.927664223604245	5.22404783055715e-20	0.191242066082594	0.208231495228659
Endothelial	TACSTD2	purple	0.832715407658227	1.31479691408171e-12	-0.0683796	0.655366468033475
Endothelial	OST4	purple	0.977741953186403	8.52377703061146e-31	-0.100913	0.509523152139603
Endothelial	UQCRQ	purple	0.983026649907521	2.64451989852703e-33	-0.156205	0.305516874517325
Endothelial	PTPRE	magenta	0.923735111781826	1.56528025828673e-19	0.0446673715905976	0.770782577936457
Endothelial	CCDC85A	green	0.942972260074094	3.6717382714029e-22	0.00377826350872047	0.980348331493859
Endothelial	EVI2B	purple	0.927203686993147	5.95991258431928e-20	-0.260086	0.0844465766607217
Endothelial	RPL41	green	-0.977672	9.11568369642021e-31	-0.123158	0.420244877747924
Endothelial	TSPAN1	green	-0.860649	3.47263458815079e-14	0.0259274630498493	0.865748897115233
Endothelial	ADAMTS9-AS2	green	0.966532414484016	4.90665254388201e-27	0.131613653134328	0.388795284713918
Endothelial	CCL23	purple	0.860324154742161	3.63877366298578e-14	-0.116284	0.446839613923292
Endothelial	HLA-B	green	0.964188201048407	2.05489913979401e-26	0.113865699874607	0.456412459106941
Endothelial	NDUFA6	purple	0.962234768367911	6.3133218398787e-26	-0.181274	0.233376031211539
Endothelial	TANC1	magenta	0.971401520174562	1.75285205332512e-28	0.197434444410668	0.193600816379416
Endothelial	EXOC6B	magenta	0.975086486222353	9.36684932383413e-30	0.0885937021201762	0.562777668512918
Endothelial	PRDX5	green	-0.965934	7.1390731559293e-27	-0.168072	0.269764646042825
Endothelial	RPSA	purple	0.981793908884754	1.17955187724569e-32	-0.157374	0.301864507339385
Endothelial	COX4I1	purple	0.978202225353522	5.46386201528052e-31	-0.169658	0.265204393681956
Endothelial	DOCK9	green	0.970206966449806	4.17530524783828e-28	0.209590016216027	0.167029660770384
Endothelial	RANBP17	green	0.96169729024458	8.50910791503592e-26	0.0183809724061538	0.904607068413617
Endothelial	TCEAL8	purple	0.961595464357995	8.99980384722808e-26	-0.137113	0.36910377820077
Endothelial	ALCAM	blue	0.924027088107622	1.44564892703224e-19	-0.0303573	0.843077875022987
Endothelial	STOX2	green	0.97946396942753	1.53519242523336e-31	0.105999190417177	0.488302671661726
Endothelial	SPCS1	purple	0.975934389090189	4.48665032519879e-30	-0.108083	0.479743674459697
Endothelial	PKHD1L1	green	0.951129662669425	1.44230227178978e-23	0.14823667205952	0.331149028180429
Endothelial	ARGLU1	green	0.94163835697331	5.95569714434593e-22	0.0161928863432501	0.915919330911616
Endothelial	RPL36	purple	0.983795772816324	9.83217863290002e-34	-0.110372	0.470432825343884
Endothelial	RPS8	purple	0.980374268363665	5.84415953125635e-32	-0.11692	0.444341469359232
Endothelial	SMAD6	green	0.902273277653802	2.59907769680867e-17	0.118202625191768	0.439326444942884
Endothelial	TNFAIP6	purple	0.844253915812407	3.19530299913571e-13	-0.10119	0.508356170746171
Endothelial	GSTP1	purple	0.975063928656818	9.548760314927e-30	-0.169194	0.26653356435057
Endothelial	CLIC1	purple	0.970493720237332	3.40109694224769e-28	-0.147053	0.335069479023859
Endothelial	EGR2	purple	0.88558343410759	6.49276143376059e-16	0.0685323632550377	0.654644907393446
Endothelial	ANK3	green	0.901128003989088	3.29995080452897e-17	-0.0111111	0.94225159170728
Endothelial	VAMP8	green	-0.964571	1.63716887801555e-26	-0.177402	0.243681379738119
Endothelial	TIMM10	purple	0.96385361612553	2.50135806079316e-26	-0.162997	0.284697648805107
Endothelial	RPAP2	green	0.908739171194141	6.37374462333161e-18	0.0802929319207568	0.600061350661462
Endothelial	POLR2J	green	-0.953502	5.06666472830881e-24	-0.101191	0.50835163042049
Endothelial	CTNNB1	blue	0.963469413163604	3.12778880172115e-26	0.139740652493277	0.359911809576726
Endothelial	FCN1	purple	0.832785529347902	1.30396757217424e-12	-0.320067	0.032081149760004
Endothelial	NAV3	green	0.96217237325953	6.53735541128814e-26	0.172057960272092	0.258403007464871
Endothelial	RPS11	purple	0.987521994855381	3.70439203519999e-36	-0.11849	0.438208757403675
Endothelial	PHACTR1	green	0.952951008852141	6.49134899060358e-24	-0.0231777	0.879876486259637
Endothelial	SUPT4H1	purple	0.964794473894454	1.43213241925076e-26	-0.0962798	0.529248229411345
Endothelial	NACA	purple	0.980165313301404	7.32342308526354e-32	-0.124596	0.41479578158676
Endothelial	C4ORF3	green	-0.968782	1.12433925671057e-27	-0.0606497	0.692277421685085
Endothelial	ERBB4	blue	0.925913050776776	8.58329129402983e-20	0.00331552638036636	0.982754753176693
Endothelial	DNPH1	purple	0.968321134785602	1.53331686843717e-27	-0.101145	0.508543460686394
Endothelial	MT-ND4L	green	-0.700129	8.65811585385249e-08	0.107698274793636	0.481318164469391
Endothelial	RAPGEF4	green	0.970070112804951	4.60140681409415e-28	0.204182027991253	0.178504333464812
Endothelial	RPL7A	purple	0.980619746792057	4.4693862175277e-32	-0.137193	0.368824362851285
Endothelial	MAML3	blue	0.952041037825133	9.71060867203312e-24	0.111397046290101	0.466296682141573
Endothelial	ATP13A4	green	0.88543609336366	6.66476056985559e-16	-0.0942323	0.538083250877094
Endothelial	NDUFC2	purple	0.969838614481758	5.41795775198661e-28	-0.111341	0.466523169535185
Endothelial	PLEKHS1	turquoise	0.854807452457745	7.89860544155915e-14	0.440489366030938	0.00245982317903101
Endothelial	UQCR11	purple	0.98372836621347	1.07429090160626e-33	-0.128082	0.401758605789056
Endothelial	EEF1B2	purple	0.980515805418992	5.0089478803741e-32	-0.110574	0.469618475157293
Endothelial	PKP4	green	0.954452783753773	3.2806458172896e-24	0.240620035406089	0.111340036041042
Endothelial	SOCS1	purple	0.926239406539187	7.83192595041221e-20	-0.209699	0.166804310655802
Endothelial	RSPH1	purple	0.843534645192674	3.50138885475399e-13	0.0890455310732454	0.56077960352382
Endothelial	DDT	purple	0.968538309657343	1.32536854779712e-27	-0.170218	0.263606553537769
Endothelial	DACH1	green	0.945009603792585	1.71427736853875e-22	0.158529045847464	0.298286459368898
Endothelial	AQP5	black	0.907201230789317	8.98685814821885e-18	0.370424627711704	0.0122530816618811
Endothelial	ABRACL	purple	0.953149403255333	5.9393768195197e-24	-0.101459	0.507222208482937
Endothelial	COX5B	purple	0.980886721032915	3.32561744568379e-32	-0.0926941	0.544767744958036
Endothelial	HP	purple	0.803970986200568	2.92501510514592e-11	-0.0667471	0.663098319508659
Endothelial	NAALADL2	green	0.963412922186578	3.23162637148927e-26	0.164890626054411	0.279064273701105
Endothelial	GNA14	green	0.960710113974656	1.45616676585748e-25	0.215067323488055	0.155962728638226
Endothelial	C22ORF34	green	0.93378338842136	8.30971690965558e-21	0.203440431119236	0.180120900486945
Endothelial	DNAH17	green	0.90747848121802	8.45086196826841e-18	0.10286010172122	0.501344038030182
Endothelial	TMTC1	green	0.942135161365909	4.98057251736874e-22	0.174948128697102	0.250368738605653
Endothelial	RNF5	green	-0.968593	1.27721120517074e-27	-0.0841924	0.582412132503084
Endothelial	MARCKSL1	purple	0.865976869296238	1.58803641685784e-14	0.150346785598443	0.324234234968869
Endothelial	NFKBIA	green	0.961850473291515	7.81861503592893e-26	0.00669453135433881	0.965187377435578
Endothelial	MYRIP	green	0.888343737472939	3.9517174142876e-16	0.313332161364248	0.0360957901767507
Endothelial	EXT1	blue	0.964573556984699	1.63469701067586e-26	0.163479403640653	0.283256593240703
Endothelial	FNDC3B	green	0.956514260406928	1.23719718713403e-24	0.0426698675887539	0.78077430638037
Endothelial	SAMD12	blue	0.960972352586438	1.26420201340304e-25	0.171826509722236	0.259053778165313
Endothelial	PTGER2	purple	0.923463238906911	1.68508069578576e-19	-0.237908	0.115552707441992
Endothelial	DANT2	green	0.959776561398184	2.39019027768334e-25	0.0186158080743203	0.903394052457589
Endothelial	TRBC2	purple	0.871012470992575	7.3461753721042e-15	-0.0454477	0.766889242825121
Endothelial	PCAT1	green	0.973444482367038	3.63497083316473e-29	0.13231522146526	0.38624956500884
Endothelial	CKS2	purple	0.908449141737297	6.80353046650206e-18	-0.305452	0.0413081331634948
Endothelial	PCBD1	purple	0.960848832445581	1.35140926411564e-25	-0.145518	0.340191832411151
Endothelial	RPL22	purple	0.986551734463354	1.835561920002e-35	-0.109922	0.472257409511219
Endothelial	LAMA2	blue	0.893896992474081	1.39734935628576e-16	0.0734031172698843	0.631800556738193
Endothelial	PLCB4	green	0.925197924943305	1.04761357489739e-19	0.315841157184124	0.0345545409575598
Endothelial	NAV2	green	0.957272840072733	8.53905501675351e-25	0.0918945309662575	0.548257762052979
Endothelial	ADAMTS6	green	0.940014203142853	1.05713684124304e-21	0.251322501841851	0.095847001063738
Endothelial	TMEM258	purple	0.9755274357419	6.40836578542912e-30	-0.176498	0.246129957049598
Endothelial	PEBP1	purple	0.96699628947955	3.65144162801275e-27	-0.249504	0.098354340728235
Endothelial	CD44	green	0.953873297799935	4.28044251227475e-24	0.0348143757842821	0.820393597148497
Endothelial	IMMP2L	blue	0.958731533340912	4.10576490941041e-25	0.0870304581724182	0.569716047312748
Endothelial	UBL5	purple	0.978471190830194	4.19492379954594e-31	-0.1752	0.249676581738823
Endothelial	ROR1	greenyellow	0.923398504476486	1.71486314940459e-19	-0.0866258	0.571518406164267
Endothelial	COX6C	purple	0.977824998212246	7.87201883894978e-31	-0.120797	0.429277218720427
Endothelial	H3F3A	purple	0.966192716061318	6.07595468759103e-27	-0.122892	0.421256734963575
Endothelial	MCTP1	green	0.881269229630673	1.37608052194885e-15	0.37634098694261	0.0108352007669243
Endothelial	XKR6	brown	0.910084781341334	4.69532023126404e-18	0.124026255085881	0.41695112511556
Endothelial	TSHZ2	green	0.827291094007484	2.46495607477013e-12	0.488831951050988	0.000656275010739109
Endothelial	YBX1	purple	0.971140341032388	2.12572335554151e-28	-0.187951	0.216315297429127
Endothelial	RPL4	purple	0.978734850427151	3.22699314866768e-31	-0.122673	0.422092436679205
Endothelial	NDUFB2	purple	0.990942477255086	3.90769555708689e-39	-0.122195	0.423915536938384
Endothelial	TIMP1	purple	0.936397478066064	3.58885040099025e-21	-0.0556695	0.716443837986024
Endothelial	PTCHD4	yellow	0.811578762642764	1.35519269130556e-11	0.617562533816712	6.20967590073293e-06
Endothelial	NDUFA2	purple	0.970055808057582	4.6482617084126e-28	-0.111142	0.46732240727306
Endothelial	RGS1	purple	0.829628075438625	1.885319215239e-12	-0.125224	0.412429136150899
Endothelial	PSMB6	purple	0.978922710613055	2.67147298793874e-31	-0.15544	0.30792074236922
Endothelial	N4BP2L2	magenta	0.94618374237764	1.09062666870687e-22	0.0501477802349877	0.743561192851388
Endothelial	ACTG2	purple	0.682454394815809	2.4252257732551e-07	0.0812157610783638	0.595863556016725
Endothelial	RAPGEF5	green	0.95711644276532	9.22246326558411e-25	0.14576659507827	0.339359350965447
Endothelial	RPS21	purple	0.973682871485324	3.00142577182405e-29	-0.112802	0.460656859083638
Endothelial	DOCK1	magenta	0.972615540953573	6.98140267664762e-29	0.228517246996057	0.131078877291997
Endothelial	PRKCE	green	0.952116639570782	9.39386747536171e-24	0.0855195076915407	0.576459496500619
Endothelial	SMDT1	purple	0.974263083945037	1.86922929838976e-29	-0.135674	0.37419797343658
Endothelial	EMC6	purple	0.959177247099822	3.26536263206373e-25	-0.106506	0.486214663405732
Endothelial	ANKRD12	magenta	0.966234564566427	5.91874895909988e-27	0.137904742916106	0.3663201912386
Endothelial	RPS26	green	-0.940151	1.00785572690926e-21	-0.158706	0.297741418473761
Endothelial	TIMM8B	purple	0.969408783915726	7.31322054934887e-28	-0.0697086	0.649098697687178
Endothelial	UQCRH	purple	0.985279158820899	1.26633101633837e-34	-0.131488	0.389253612656139
Endothelial	ZBTB20	blue	0.976684555218332	2.28799337435029e-30	0.198821500927348	0.190426032599502
Endothelial	SMYD3	blue	0.939411503954358	1.3026929901041e-21	0.0554283049103116	0.717621519152105
Endothelial	MCL1	green	0.957390363564781	8.05752103301232e-25	0.0892638508169684	0.559815345015562
Endothelial	ANXA1	green	0.931199177281503	1.84381149521951e-20	0.0704801588044475	0.645470569113211
Endothelial	ATP6V1G1	purple	0.966182649979684	6.11435711032047e-27	-0.152232	0.318133712410647
Endothelial	MORN2	green	-0.946986	7.96074364102542e-23	-0.048587	0.751283959801452
Endothelial	BCAS3	blue	0.954639899571557	3.00838796760019e-24	0.187945951940096	0.216326824525056
Endothelial	SASH1	blue	0.953212893959098	5.77237563653548e-24	0.20039242357767	0.186875264844064
Endothelial	RPL37	purple	0.976060262886208	4.01325788482793e-30	-0.0970882	0.525779726607798
Endothelial	THBS1	green	0.899422711678934	4.68359314348883e-17	-0.0370009	0.809316560717742
Endothelial	AC019117.1	green	0.918377107345994	6.38151461210225e-19	0.103041668774348	0.5005849001056
Endothelial	CDK14	blue	0.965528744435787	9.16963228600557e-27	0.150060202754818	0.32516799872889
Endothelial	SOD2	green	0.950487907612635	1.89706082625109e-23	0.0698649420672286	0.648362773309037
Endothelial	VKORC1	purple	0.969876470191005	5.2756042007054e-28	-0.0768088	0.616025042104844
Endothelial	SFTPA1	greenyellow	0.763871401483608	1.03454128741864e-09	-0.236074	0.118470391221064
Endothelial	AGBL1	greenyellow	0.82165855252227	4.62830781822282e-12	-0.131626	0.388749541094316
Endothelial	RHOG	purple	0.963168836547894	3.71921210627209e-26	-0.161881	0.288054734244183
Endothelial	MBD5	magenta	0.960377897105009	1.7393705148288e-25	0.079382366806156	0.604215958699056
Endothelial	CSF3	purple	0.604517505793628	1.09389165549371e-05	-0.118668	0.437516
Endothelial	TEKT1	black	0.886390077426606	5.62325213221262e-16	0.224639950409752	0.137925537482101
Endothelial	MRPL36	purple	0.955144890076997	2.3767993362921e-24	-0.0955253	0.532495797250376
Endothelial	RAN	purple	0.984953942077188	2.01925681883746e-34	-0.146829	0.335811180945556
Endothelial	PITPNM2	green	0.976221310717322	3.47666782340364e-30	0.076202744535297	0.618820142528612
Endothelial	EPB41L4A	green	0.963250232002329	3.54931988442919e-26	0.170338916931005	0.263262581523825
Endothelial	RPLP0	purple	0.97845269495595	4.27231315602553e-31	-0.169809	0.264772568446157
Endothelial	RPL15	green	-0.974057	2.21374505755666e-29	-0.127527	0.403818705131412
Endothelial	HSPA8	purple	0.954496001595483	3.21575603009523e-24	-0.0354357	0.817242334626219
Endothelial	ZNF407	blue	0.969568279732054	6.54616004251312e-28	0.113135874742962	0.459322708862286
Endothelial	TEAD1	magenta	0.966263597956923	5.81196717521936e-27	0.188547009809928	0.214834560560388
Endothelial	TIMM13	purple	0.987903183725254	1.90833654537368e-36	-0.123528	0.418839104698729
Endothelial	THY1	purple	0.685197680646482	2.07660969310885e-07	0.433353720460219	0.0029428886077756
Endothelial	SAA2	purple	0.638323835717083	2.38793590373816e-06	0.104941782206966	0.492675870228084
Endothelial	ZEB2	green	0.946926122786147	8.15099625587974e-23	0.0561671892308622	0.714016033345844
Endothelial	IGF1R	blue	0.937404554613121	2.57239257423414e-21	0.183549728511281	0.22746043470715
Endothelial	COBLL1	green	0.937147082211946	2.8024500710002e-21	0.121586660713899	0.426244470570398
Endothelial	NDUFAF3	purple	0.969756177814578	5.74071352442706e-28	-0.105249	0.491404364046116
Endothelial	NXT1	purple	0.958770713320427	4.02434260778588e-25	-0.121785	0.425486396154579
Endothelial	SLC4A4	blue	0.903570431308391	1.97618070989631e-17	0.289516279242462	0.0537284908708515
Endothelial	ORMDL2	purple	0.968561525667885	1.30480067229215e-27	-0.150719	0.323023765238974
Endothelial	TMEM147	purple	0.985427175076255	1.02051690517123e-34	-0.140728	0.356492536650908
Endothelial	SERTAD1	purple	0.953399131645366	5.30789562974361e-24	-0.076455	0.617656114558734
Endothelial	GPR65	purple	0.8921096501693	1.96467803282934e-16	-0.194962	0.199352588572065
Endothelial	DLEU2	green	0.951438323651919	1.26252038170778e-23	0.217135181171717	0.151927369381519
Endothelial	FCHSD2	green	0.955332775249507	2.17577973674555e-24	0.144178286755582	0.344704681349762
Endothelial	MDK	purple	0.792639346855603	8.66519308223431e-11	0.422394575147134	0.00384755951275811
Endothelial	TRAPPC9	magenta	0.972401429874894	8.23649103163697e-29	0.175050378381246	0.250087615762774
Endothelial	COX14	purple	0.978474205857152	4.18243577109243e-31	-0.103087	0.500393636078107
Endothelial	GLIS3	green	0.923799238151918	1.53822643469596e-19	0.290531455840916	0.0528566365136225
Endothelial	IL2RG	purple	0.903974766480208	1.81297362356971e-17	-0.106449	0.486449656768097
Endothelial	DNM3	green	0.972566238193549	7.2531396663093e-29	0.203604381103358	0.179762614623916
Endothelial	SHROOM4	green	0.961315584380502	1.04911193348109e-25	0.19814137458719	0.191978096999048
Endothelial	BRK1	purple	0.974932353325314	1.06787341651723e-29	-0.10698	0.484262860095018
Endothelial	CACNA1C	green	0.933764467065529	8.35932056520733e-21	0.199007571051231	0.190002973254455
Endothelial	TSC22D3	green	0.938119576520432	2.02392633491831e-21	0.0100437289344095	0.947791016641966
Endothelial	UNC13B	green	0.960769853240195	1.41013895150628e-25	0.00864223989153863	0.955068154646162
Endothelial	L3MBTL4	magenta	0.957969635371579	6.03814906598796e-25	0.0897254571429633	0.557779113915346
Endothelial	CORO1A	purple	0.912164788710469	2.89968131659322e-18	-0.181427	0.232973705718805
Endothelial	DNAJB1	purple	0.868885266052628	1.02134423319814e-14	-0.117214	0.443191707538407
Endothelial	STMN1	green	-0.974299	1.81400394918228e-29	-0.135045	0.376436438619608
Endothelial	HSD17B10	purple	0.973727032961091	2.89625018096846e-29	-0.121629	0.426083841861275
Endothelial	SELE	green	-0.1942	0.201148285779962	0.435115769320629	0.00281642985800058
Endothelial	IFI27L2	green	-0.969843	5.40026140241101e-28	-0.153343	0.314574121848337
Endothelial	RPS27L	green	-0.968119	1.75411415695693e-27	-0.0323201	0.833071472270967
Endothelial	ARPC2	green	0.988958872231152	2.70726050272874e-37	0.0836747985902902	0.584741403483156
Endothelial	FHIT	green	0.932104958196708	1.39942360146328e-20	0.027181135917175	0.859321241191517
Endothelial	SLC2A3	green	0.899386087384233	4.7186236507346e-17	0.0212973754966159	0.889558817585508
Endothelial	CCDC78	green	-0.800978	3.92314783913209e-11	0.115102098807056	0.45150509861857
Endothelial	APBB2	magenta	0.971292529120379	1.90017298184155e-28	0.188086286252747	0.21597777012184
Endothelial	NLGN4Y	green	0.258943740866817	0.0858698285836546	0.322007158795992	0.0309959828498264
Endothelial	THSD7A	green	0.932876248512029	1.10320240442079e-20	0.229328443721692	0.129679171894759
Endothelial	RYR2	green	0.958142019970699	5.53702290640627e-25	0.135866859898599	0.373513399281658
Endothelial	PTPRK	green	0.965143909260667	1.15971793116272e-26	0.148002607187507	0.331921679764203
Endothelial	RPA3	purple	0.958680797457026	4.21353358799937e-25	-0.12215	0.424087893654065
Endothelial	MPC2	green	-0.966772	4.21342687882764e-27	-0.0320439	0.834478263861919
Endothelial	CHIT1	green	-0.676228	3.42835732720563e-07	0.335226326327372	0.024381684124601
Endothelial	NDUFB10	purple	0.979210991488587	1.99249774636314e-31	-0.0889088	0.561383753631293
Endothelial	LSM3	purple	0.979187634242605	2.0407156113037e-31	-0.127318	0.404595544083681
Endothelial	TLL1	green	0.917867934898659	7.2567121322083e-19	0.303949923979304	0.042368060909555
Endothelial	NENF	purple	0.977331169811784	1.25782661391696e-30	-0.0890182	0.560900377532984
Endothelial	NME1	purple	0.966398389824241	5.33978790760525e-27	-0.0774174	0.613223707983695
Endothelial	GRK5	green	0.959751531234515	2.42176842664723e-25	0.0834596796598152	0.585710653529932
Endothelial	RNF13	blue	0.976102594466979	3.86503761656712e-30	0.0851828406159733	0.577966990867718
Endothelial	FENDRR	brown	0.797370965155122	5.55197546448401e-11	-0.0765344	0.617290031713878
Endothelial	ARHGDIB	green	-0.973528	3.40109609182575e-29	-0.0826227	0.589488613330512
Endothelial	BLOC1S4	purple	0.932535329319545	1.22592204356487e-20	-0.0561744	0.713980779352096
Endothelial	CALM3	purple	0.981968549701354	9.60430641429716e-33	-0.0962413	0.529413743682772
Endothelial	MZT2B	purple	0.986092904611168	3.75892262673799e-35	-0.0587422	0.701499566220132
Endothelial	SSR4	purple	0.984669247353287	3.01299298933968e-34	-0.145997	0.338589157581906
Endothelial	LSM10	purple	0.960008714036991	2.11539389333798e-25	-0.180759	0.234729960931415
Endothelial	MYL12A	purple	0.963457826848515	3.14882354698044e-26	-0.201398	0.18462721328838
Endothelial	TMTC2	green	0.962499818060493	5.4405329254967e-26	0.0976190415461104	0.523507945496949
Endothelial	PPP1R9A	green	0.94288212611209	3.7951092501064e-22	0.00864859527534212	0.955035146140409
Endothelial	POLR2L	purple	0.983648947092672	1.19191316966926e-33	-0.119316	0.434996316299466
Endothelial	MCC	blue	0.950416759140434	1.9551478988378e-23	0.20683156670517	0.172813830607504
Endothelial	CCDC85B	purple	0.891585129996809	2.1688450659393e-16	0.0235852624448135	0.877780168378812
Endothelial	CHSY3	blue	0.96104457685913	1.21572035141189e-25	0.145872943336728	0.33900328588788
Endothelial	DCTN3	purple	0.98554658360683	8.5606556989676e-35	-0.140919	0.355835145599576
Endothelial	TEK	green	0.941057549194096	7.32585634542136e-22	0.103618551013971	0.498176843249383
Endothelial	ROBO2	blue	0.920379513143464	3.81807213656533e-19	0.137945832408966	0.366176018632593
Endothelial	RASGRF2	green	0.897494950234047	6.90644032340757e-17	0.324215270604153	0.0297978219219964
Endothelial	TAOK1	green	0.927823943490929	4.9896474025274e-20	0.119091293422047	0.435869682857438
Endothelial	TMEM163	green	0.900340091558206	3.88249451704107e-17	-0.0514029	0.737368805269785
Endothelial	AKT3	green	0.958906181720221	3.75449723266443e-25	0.20826434213266	0.169791686898259
Endothelial	RPL5	purple	0.973415701075959	3.71955907511081e-29	-0.126083	0.409208384733118
Endothelial	ADGRV1	green	0.935499386611548	4.80777424008535e-21	-0.0379462	0.804539383109055
Endothelial	ARHGAP26	green	0.944822675593336	1.84056777815776e-22	0.18140767588881	0.233025562652021
Endothelial	NDUFB7	purple	0.97827146122329	5.1061316384272e-31	-0.127627	0.403447792405761
Endothelial	POLR2I	purple	0.985936135345837	4.77594694761073e-35	-0.118671	0.43750448199512
Endothelial	SLC25A6	purple	0.989686052277619	6.30210323027221e-38	-0.157435	0.301675306765483
Endothelial	TMSB10	purple	0.966969239345089	3.71532966645212e-27	-0.0956913	0.531780190796203
Endothelial	BMP6	green	0.89881890296783	5.2938894298948e-17	0.274401207941437	0.0681322601018096
Endothelial	SNX25	green	0.892009714789994	2.00211528872617e-16	-0.0933151	0.542064126436594
Endothelial	ZNF331	green	0.919870356446781	4.3562852973664e-19	0.0672136384189935	0.660885041116521
Endothelial	HMGA1	green	-0.908435	6.82553145687476e-18	-0.118268	0.439070978565464
Endothelial	TUBB	purple	0.965526804543995	9.18055602904277e-27	-0.0676029	0.659040660674756
Endothelial	VPS13B	magenta	0.963708650501029	2.72220875760399e-26	0.123836266705858	0.417670697078397
Endothelial	BTNL9	green	0.845559156509452	2.70336918328855e-13	-0.193395	0.203059639673583
Endothelial	TMEM108	green	0.933432717831965	9.27611324265509e-21	0.160000081850305	0.293767565904195
Endothelial	SPN	purple	0.890358449889589	2.72767390047542e-16	-0.179626	0.237724022689921
Endothelial	EFCAB1	black	0.904174263779563	1.73724109430914e-17	0.207940320958383	0.170471774929269
Endothelial	BANF1	purple	0.969303557834341	7.86534263681453e-28	-0.101138	0.508575295239595
Endothelial	C9ORF16	purple	0.974478887855198	1.56303209828139e-29	-0.0566618	0.711605881579729
Endothelial	TUBB4B	purple	0.969650715285228	6.18036751028637e-28	-0.124483	0.415224569469549
Endothelial	SF3B6	purple	0.974936006351004	1.0645711614967e-29	-0.160222	0.293089744275464
Endothelial	TMA7	purple	0.982805477778611	3.48564614980989e-33	-0.106796	0.48501936349171
Endothelial	ERG	green	0.944397173994511	2.16184030231345e-22	0.258591931273091	0.0863118112333902
Endothelial	PTMA	purple	0.967481148204622	2.66910456535609e-27	-0.0869258	0.57018203883218
Endothelial	NEBL	green	0.889545664132173	3.17040891672773e-16	-0.140561	0.357069395708885
Endothelial	SLCO2A1	green	0.949267597654881	3.1630971776529e-23	0.236135288834647	0.118371744447327
Endothelial	PRKD1	blue	0.960113017094123	2.00197326339349e-25	0.112157135018887	0.463241217305527
Endothelial	SHANK2	green	0.937448374224595	2.53507204551161e-21	0.0392746619695123	0.797837067164768
Endothelial	APRT	purple	0.971968168042318	1.146359349775e-28	-0.155839	0.30666504348053
Endothelial	WDR83OS	purple	0.973691660255619	2.98020862715199e-29	-0.148171	0.331366337364885
Endothelial	ERN2	turquoise	0.9176235392301	7.71619022868369e-19	0.513899193698117	0.000305320561669636
Endothelial	HLA-A	green	0.951737819582844	1.10860429178373e-23	0.14135257606041	0.35434163785227
Endothelial	DYSF	green	0.958694310005949	4.18457134996474e-25	0.184058484525745	0.226152213297363
Endothelial	GLIPR1	purple	0.924888361504863	1.14129969653702e-19	-0.0916729	0.549226906718662
Endothelial	CAMKMT	magenta	0.963436461406609	3.18796569370495e-26	0.0533788003661549	0.727653942844503
Endothelial	SLC6A4	brown	0.571042619454468	4.19598475402437e-05	-0.216518	0.153124150713851
Endothelial	ZNF423	green	0.932532438290024	1.22701616379015e-20	0.235854098479956	0.118823565188598
Endothelial	DPYD	blue	0.960364600481644	1.75173113550998e-25	-0.0155817	0.919082076893009
Endothelial	CDC26	purple	0.954176382389931	3.72606502865189e-24	-0.152571	0.317046063957768
Endothelial	ZDHHC14	green	0.920617526540459	3.58872745534622e-19	0.207354120214486	0.171707150157703
Endothelial	PLP2	purple	0.964333949726945	1.88513182665385e-26	-0.183298	0.228110070529544
Endothelial	SUMO2	purple	0.977922720830198	7.16583189666283e-31	-0.0948824	0.535270386310486
Endothelial	PDE7B	yellow	0.935587365853301	4.672882057715e-21	0.365744974871626	0.0134841482450149
Endothelial	RPS24	green	-0.964035	2.24849409181023e-26	-0.0955295	0.532477439767194
Endothelial	LRRK2	green	0.82424290030263	3.47603124686412e-12	-0.152244	0.318095015026863
Endothelial	MAML2	blue	0.959046510881397	3.49317233875524e-25	0.227037306117434	0.133661555568204
Endothelial	VIPR1	brown	0.810368034558553	1.5352241652114e-11	-0.14256	0.350204753517329
Endothelial	C2CD4B	purple	0.513805941374161	0.000306224766200439	0.394841984450012	0.00727093724261188
Endothelial	RPS14	purple	0.974234572893277	1.91371787230301e-29	-0.136722	0.37048378896855
Endothelial	GTF3C6	purple	0.977032721790588	1.66137211019218e-30	-0.129277	0.397345802812763
Endothelial	BBS9	blue	0.962909637418275	4.31330989606603e-26	0.193663596506523	0.202420795284409
Endothelial	FUS	green	0.958461131230349	4.71197259285569e-25	0.117495729998407	0.442086949923322
Endothelial	CUTA	purple	0.98574616440601	6.36103921917141e-35	-0.13751	0.36770726516015
Endothelial	CFAP157	black	0.88899673068636	3.50707650305016e-16	0.218716380908076	0.148893838748688
Endothelial	GPCPD1	green	0.940042954911298	1.0465992526682e-21	0.119260245829414	0.435214203920374
Endothelial	DIP2C	green	0.965448354159353	9.63284707713555e-27	0.164876827378875	0.279105067317722
Endothelial	OMG	purple	0.903175387972415	2.14903083916953e-17	-0.0595134	0.697765958318419
Endothelial	NDUFS5	purple	0.973619173415203	3.15955662403373e-29	-0.132109	0.386995412939477
Endothelial	INVS	magenta	0.940756388547553	8.14945192631729e-22	0.0725032762298232	0.635996260921315
Endothelial	ERICH3	black	0.915551256647022	1.28891525814568e-18	0.239046799520339	0.1137695778084
Endothelial	HIGD1A	purple	0.956929225850967	1.01090387665685e-24	-0.0953226	0.53336973100726
Endothelial	SMIM22	purple	0.871397415848589	6.91661429429382e-15	0.0130655271267813	0.932115583613528
Endothelial	NLGN1	green	0.946774010760879	8.6550666558341e-23	0.0879339306561674	0.565701229433227
Endothelial	ST8SIA6	green	0.867978854501665	1.17326967693649e-14	0.187391598529694	0.217709500231332
Endothelial	PITPNC1	green	0.935596178483534	4.6595703085457e-21	0.248244151548676	0.100121832904451
Endothelial	NBEA	green	0.942001061083002	5.22765934090001e-22	0.154741779054907	0.310125542933726
Endothelial	HINT1	green	-0.978085	6.12753152449615e-31	-0.111211	0.467046043137775
Endothelial	ABLIM1	green	0.952877019456643	6.70943066970955e-24	0.289303336887397	0.053912831195594
Endothelial	LAMA3	green	0.869033103300364	9.98405333197207e-15	-0.113899	0.45628126988377
Endothelial	PIK3R3	green	0.946545780154791	9.46733435865164e-23	0.227389500191778	0.133043517884019
Endothelial	FAM160A1	green	0.92904987927266	3.49543414535878e-20	-0.0411668	0.788316248848808
Endothelial	CACHD1	green	0.938130415911026	2.01653805131495e-21	0.330159531156659	0.0267618638210581
Endothelial	COL4A2	green	0.933495605331325	9.0952913701522e-21	0.26287187084678	0.0810538110491928
Endothelial	PYURF	green	-0.965282	1.06644591319417e-26	-0.0576443	0.70682689151669
Endothelial	NHP2	purple	0.971442490452814	1.70033920489789e-28	-0.113314	0.458612117107327
Endothelial	S100A14	purple	0.871107896705181	7.23739467348089e-15	-0.267721	0.0754033743877473
Endothelial	ABCA3	green	0.769719932107444	6.43272058305318e-10	-0.186656	0.219554442161126
Endothelial	PDZD2	green	0.953665251623483	4.70548290415616e-24	0.0845656271378255	0.580735324299403
Endothelial	EFNA5	green	0.931868339491495	1.50450959701206e-20	0.279010318110459	0.0634481818474691
Endothelial	DNAJB9	purple	0.953400970534004	5.30349184571112e-24	-0.177949	0.242206279494459
Endothelial	HSBP1	purple	0.975456682605769	6.81395579628198e-30	-0.0740892	0.628609000649371
Endothelial	ELMO1	blue	0.960513152884551	1.61826339360424e-25	0.161722701222728	0.288532436665516
Endothelial	BMPR1B	yellow	0.862235418664078	2.76048177284298e-14	0.276302275534927	0.0661681006050196
Endothelial	CASC15	green	0.935610478384774	4.63804653418399e-21	0.301365798657074	0.044243671746136
Endothelial	SNED1	green	0.966462937701974	5.12682898426175e-27	0.237924911048145	0.115526552856781
Endothelial	NCF1	purple	0.818954636243509	6.21439694178943e-12	-0.345039	0.0202733764974898
Endothelial	BICD1	green	0.963676058087933	2.77435682283169e-26	0.207576896158704	0.171236907045355
Endothelial	ITGA9	green	0.963129926017926	3.80313609946602e-26	0.256731342546082	0.0886788318587858
Endothelial	AC007319.1	green	0.939436413676278	1.29155057655624e-21	0.137721861636324	0.36696228944213
Endothelial	HIVEP3	green	0.96104870031601	1.21300650809924e-25	0.0968808179994885	0.526668298424465
Endothelial	ZNF521	green	0.89327733275549	1.57364679795722e-16	0.403196707417414	0.00602785149996741
Endothelial	BLOC1S1	purple	0.96424528999969	1.98673768146751e-26	-0.148309	0.330908999674998
Endothelial	PPP1R13B	green	0.952571248845715	7.68684909000081e-24	0.164403964786899	0.280505375335703
Endothelial	SEC61B	purple	0.973121034456841	4.70056718036195e-29	-0.146038	0.338452553378532
Endothelial	MEIS1	blue	0.913687459682235	2.02212973732143e-18	0.115044824600984	0.451731786321964
Endothelial	EGFR	green	0.923929814293654	1.48450538124908e-19	0.141297470500365	0.35453118923864
Endothelial	HLA-DRA	purple	0.883762192474422	8.94764753417906e-16	-0.179024	0.239326231123608
Endothelial	C11ORF96	purple	0.795734510643016	6.48458167658197e-11	-0.120981	0.428568442833863
Endothelial	COA6	purple	0.949671806849638	2.67411311088163e-23	-0.087234	0.568810483018662
Endothelial	PABPC1	green	0.962486484200374	5.48154769276821e-26	0.0945748857029221	0.536600181428393
Endothelial	FXYD3	purple	0.81211794029188	1.2815989471581e-11	-0.0652538	0.670201075955909
Endothelial	CCR7	purple	0.875811439697037	3.41748498233083e-15	0.0753701204854936	0.622668853961129
Endothelial	ZHX2	magenta	0.948551976180538	4.24410180058495e-23	0.155394178275693	0.308065084299116
Endothelial	HNRNPA0	purple	0.978125821070801	5.88630654277164e-31	-0.110841	0.468539085314454
Endothelial	RRAGA	purple	0.963468674539364	3.12912575926592e-26	-0.0405237	0.791548453244685
Endothelial	GRB10	green	0.954511164852764	3.19327982727196e-24	0.301682392714097	0.0440103113283794
Endothelial	MRFAP1	purple	0.964870805978714	1.36787418542996e-26	-0.0658278	0.667467167574682
Endothelial	CHMP2A	purple	0.984948232835973	2.03567991309254e-34	-0.130026	0.394591646376715
Endothelial	ADAMTS9	yellow	0.819173520877852	6.06901328639725e-12	0.37774089916106	0.010521084853231
Endothelial	MIR99AHG	green	0.926921416736811	6.45852748513391e-20	0.296201481010474	0.0481945644541998
Endothelial	SNRPG	purple	0.966482949132921	5.06246544235998e-27	-0.130449	0.393041806063823
Endothelial	HSPB1	purple	0.886008633219879	6.01968008659665e-16	0.0317198835090275	0.836128848422972
Endothelial	GPR39	greenyellow	0.914596708913764	1.62536225210245e-18	0.00816612639515511	0.957541193999631
Endothelial	UQCRFS1	purple	0.981236506547623	2.24342209291217e-32	-0.178722	0.240132511811139
Endothelial	CTSH	green	0.864541625435858	1.96705266249435e-14	-0.0945376	0.536761411403615
Endothelial	LDHB	green	-0.956898	1.02626297705336e-24	-0.222189	0.14238774675953
Endothelial	COL4A1	green	0.898298716942012	5.87944025353185e-17	0.340808661608735	0.0219668299910847
Endothelial	MRPL34	purple	0.97235274948251	8.55042822742477e-29	-0.077062	0.614858950405382
Endothelial	C1QBP	purple	0.977080900038849	1.58879046461338e-30	-0.0895512	0.558547460561048
Endothelial	PTK2	magenta	0.967897986024337	2.0309653369457e-27	0.184878459043332	0.224054638582656
Endothelial	RPL26L1	purple	0.959587536959328	2.6386997920505e-25	-0.109466	0.474105637131304
Endothelial	DNAAF1	black	0.904187993080472	1.73214116760526e-17	0.173592917294535	0.254114833997993
Endothelial	ABCC4	green	0.943625552225434	2.88497320567608e-22	0.128507106191851	0.400185597248673
Endothelial	COA3	green	-0.931114	1.89171058225075e-20	-0.0967453	0.527249611671275
Endothelial	CHCHD1	purple	0.969316629696497	7.79465613633749e-28	-0.0676109	0.659002672627339
Endothelial	HDAC9	green	0.879607984501067	1.82351083598233e-15	0.262875553241521	0.0810493977105214
Endothelial	AGR2	green	-0.82422	3.4850853107842e-12	0.062809241168148	0.681889701089289
Endothelial	LINC01473	blue	0.972062346096358	1.06734128290733e-28	0.140575448344934	0.357020495237613
Endothelial	ATP8B1	green	0.915151520051671	1.4208533625443e-18	0.336134693802427	0.0239742613504067
Endothelial	STX18-AS1	green	0.936205351295625	3.82187680350117e-21	0.106706580484954	0.485388381637772
Endothelial	ISOC2	green	-0.946197	1.08491205798504e-22	0.0454147524768129	0.767053416013339
Endothelial	OPHN1	blue	0.946717668373273	8.84919090208632e-23	0.148911801979576	0.328926706369508
Endothelial	SNRPD3	purple	0.968390780178503	1.46346378646632e-27	-0.114125	0.455381329934049
Endothelial	COPRS	purple	0.966122681044416	6.34797324078009e-27	-0.0733588	0.632007125805104
Endothelial	EXOC4	blue	0.947741425031501	5.89134705213399e-23	0.209390841436045	0.167442546691405
Endothelial	C12ORF57	green	-0.954957	2.59552803498003e-24	-0.079466	0.603833842472352
Endothelial	EML4	blue	0.920240774989553	3.95810858071541e-19	-0.0168474	0.912533821593516
Endothelial	SETBP1	blue	0.94436722735072	2.18635384889827e-22	0.256664957417018	0.0887642091247093
Endothelial	CD2	purple	0.888615577608753	3.7604846811157e-16	-0.0407358	0.79048208890266
Endothelial	DCN	purple	0.832561302491957	1.3388955385438e-12	-0.0553015	0.718241135961144
Endothelial	DISP1	green	0.914737158382771	1.57109916208334e-18	0.0330983090064558	0.829111463840576
Endothelial	PHB	purple	0.977485891212434	1.08726975563401e-30	-0.166301	0.27491449225593
Endothelial	RNF130	magenta	0.965921340856672	7.19605711279334e-27	0.105397259586821	0.490789641053932
Endothelial	IL6	purple	0.833452399062541	1.2051039640327e-12	-0.0142032	0.926220125332302
Endothelial	NDUFA8	green	-0.967502	2.63366643950682e-27	0.00474251273999752	0.975334421181777
Endothelial	PLXDC2	blue	0.934987107282029	5.66976070845129e-21	0.0422439687780257	0.782909281629582
Endothelial	NDUFB4	green	-0.963349	3.35250340305642e-26	-0.0749073	0.624812455374486
Endothelial	MYO1D	green	0.952668888745336	7.36089561206374e-24	0.168062240895437	0.269791603331784
Endothelial	WDPCP	magenta	0.943597564595362	2.9151038511706e-22	0.135175575066155	0.375972481882799
Endothelial	DMD	green	0.921086122832949	3.17487722350604e-19	0.125115029391321	0.412841067018021
Endothelial	C12ORF75	green	-0.918551	6.10613099806677e-19	0.104058481311353	0.496344462961676
Endothelial	MRPS33	green	-0.934089	7.54615168340087e-21	-0.0210993	0.890579960543222
Endothelial	PARK7	purple	0.974046353769829	2.23372608713752e-29	-0.126909	0.406120626740975
Endothelial	MYL12B	purple	0.974449633169155	1.60154510350154e-29	-0.16886	0.26749147926528
Endothelial	DUSP4	green	-0.86855	1.07520783256522e-14	0.123369624648596	0.419441074313974
Endothelial	IQCJ-SCHIP1	green	0.970422193895188	3.58028722209129e-28	0.0777619911362821	0.61163981810598
Endothelial	HMCN1	green	0.916522912312093	1.0149995423399e-18	0.407502948159654	0.00546252350973074
Endothelial	TBC1D8	green	0.938712710022179	1.65523441864497e-21	0.153272165611401	0.314799067369965
Endothelial	RERE	magenta	0.969301219390277	7.87805203254308e-28	0.168968003065907	0.267181353919746
Endothelial	MAPK10	green	0.887600116453567	4.52305184875474e-16	0.126838338749559	0.406383238796487
Endothelial	CLIC5	green	0.879024935824339	2.01091715230537e-15	-0.0879128	0.565795098477787
Endothelial	ZEB1	green	0.950179074266175	2.16171279640774e-23	0.242688517424245	0.108206038432096
Endothelial	MS4A6A	purple	0.900638804005164	3.65101086351612e-17	-0.114996	0.451926957551815
Endothelial	SUMO3	purple	0.96879666674153	1.11290682791445e-27	-0.147592	0.333278510917652
Endothelial	CDKAL1	blue	0.964166345623866	2.0815780119897e-26	0.182795176600038	0.229410263810299
Endothelial	SNRPE	purple	0.978025821109049	6.48638073099254e-31	-0.0815321	0.594427519432484
Endothelial	PTPRD	blue	0.941631161718001	5.97107136623622e-22	0.0616415623735144	0.687499310262099
Endothelial	RPS19BP1	purple	0.97606060218633	4.01204861766955e-30	-0.0917552	0.548867218187453
Endothelial	CDC42BPA	blue	0.970943203805454	2.45596595455063e-28	0.175253557793687	0.249529630486794
Endothelial	SCMH1	magenta	0.96283745386687	4.49420128930468e-26	0.131491496063894	0.389239550297698
Endothelial	SH3RF1	green	0.938021991482501	2.09161041021506e-21	0.119694066684504	0.433533639698286
Endothelial	CALCRL	blue	0.919667206848896	4.5905194948543e-19	0.176737293778939	0.24548033636743
Endothelial	S1PR4	purple	0.911720111394416	3.21759592187902e-18	-0.23614	0.118364706332784
Endothelial	DISC1	green	0.935504151034619	4.80037549379794e-21	0.229283283906884	0.129756798905883
Endothelial	PDE1C	brown	0.824125471205017	3.52190070836484e-12	0.084755857832037	0.579881461004721
Endothelial	CXCL1	purple	0.754702067254087	2.12165361527119e-09	0.0441442072053351	0.773396029965077
Endothelial	NR2F2-AS1	green	0.952029255952388	9.7608758729329e-24	0.221279365741689	0.144071860346508
Endothelial	TUBA1A	purple	0.939092415463892	1.45375692080806e-21	0.0120865067177051	0.937191709752012
Endothelial	PPIF	purple	0.947488056118715	6.52036312963366e-23	-0.26699	0.0762347721509937
Endothelial	MIA2	magenta	0.981063843641696	2.72709297986382e-32	0.0842392213874382	0.582201740087998
Endothelial	DYNLRB2	purple	0.817043044811778	7.63140202727622e-12	0.111985277152887	0.46393112189444
Endothelial	SPIDR	magenta	0.952989739391418	6.37989774504008e-24	0.0835981373549193	0.585086729464914
Endothelial	EXOC6	green	0.951816840755229	1.07107394151454e-23	0.258318007622371	0.0866571703852178
Endothelial	UFC1	green	-0.973793	2.74634135925541e-29	-0.0858666	0.574907179627208
Endothelial	RAI14	green	0.91762440172398	7.71452116146596e-19	0.334297531840043	0.0248042365384996
Endothelial	IFI27	green	-0.93668	3.27009636382472e-21	-0.0523496	0.732709279513538
Endothelial	MGP	purple	0.835426910924255	9.52246478950488e-13	0.215139474683005	0.155820620285902
Endothelial	CACYBP	green	-0.942297	4.69661838857996e-22	-0.122959	0.421001434602367
Endothelial	PSME1	purple	0.975801489210898	5.04397796755687e-30	-0.169959	0.264345492876335
Endothelial	MCF2L	green	0.933722246423387	8.47102142851344e-21	0.150565855769924	0.323521582707195
Endothelial	C1ORF122	purple	0.9140314745227	1.86226886232233e-18	-0.0488582	0.749940328949002
Endothelial	MED13L	blue	0.937847427966828	2.2180866850166e-21	0.128006674179153	0.402038374384269
Endothelial	RNF149	green	0.951177364189572	1.41301046745915e-23	-0.017324	0.910069463781565
Endothelial	CATSPERB	green	0.943364854318199	3.17748405192489e-22	0.162016472150571	0.287645745182246
Endothelial	ERP29	purple	0.983886829696462	8.71811252196025e-34	-0.158373	0.298768611479647
Endothelial	MEIS2	blue	0.950304573188733	2.05018888694169e-23	0.165479117790678	0.277328130779267
Endothelial	GPM6A	green	0.93626238249909	3.75124516293021e-21	-0.00100171	0.994789367739303
Endothelial	PCCA	blue	0.948715070169909	3.9705368959926e-23	0.187825237039723	0.216627392666607
Endothelial	CISD3	green	-0.960619	1.52947305617993e-25	-0.187079	0.218491801793301
Endothelial	ZBBX	black	0.884891134829093	7.33919730399589e-16	0.264631185586585	0.0789666167928272
Endothelial	GSTM3	purple	0.920460016181575	3.73898661096088e-19	-0.0361508	0.813619072428632
Endothelial	HHIP	greenyellow	0.542113431638427	0.000119839632329437	-0.501407	0.000450356027795329
Endothelial	PTPN13	green	0.884960134009411	7.25036143357413e-16	0.024246538079441	0.874380488514587
Endothelial	PLXNA2	green	0.940037292018555	1.04866678592697e-21	0.186798314717928	0.219196053088099
Endothelial	PGAM1	purple	0.945848870911283	1.24204410822071e-22	-0.102895	0.501198088398574
Endothelial	NDUFB9	purple	0.975325613588389	7.6307464777144e-30	-0.180865	0.234451243107855
Endothelial	MANF	purple	0.963007187732027	4.07983481392121e-26	-0.131085	0.390720000030475
Endothelial	PPARG	green	0.90063830834048	3.65138389442111e-17	0.00854470694605862	0.955574729220267
Endothelial	NOTCH4	green	0.934296216235018	7.06706859617908e-21	0.169540026556047	0.265541540529661
Endothelial	ESR2	yellow	0.922748637988337	2.04289223861065e-19	0.421452710305681	0.0039356247475491
Endothelial	TMEM256	green	-0.963623	2.86116859865775e-26	-0.0544063	0.722618583703746
Endothelial	TSEN34	purple	0.929332812643761	3.21688350543225e-20	-0.158253	0.299140488090239
Endothelial	MSL2	green	0.912644566551213	2.59020253074935e-18	0.0855691664166457	0.576237291095207
Endothelial	PEAK1	blue	0.967826484831939	2.12896164726644e-27	0.229765801235774	0.128929179029901
Endothelial	TMEM126A	purple	0.956898120245236	1.02639811337432e-24	-0.168561	0.268352164716484
Endothelial	UBE2S	purple	0.919782362959308	4.45631428928248e-19	0.0519109766210512	0.734866896568374
Endothelial	ELL2	blue	0.900908672773237	3.45319116780107e-17	-0.0488235	0.750112175513125
Endothelial	SNRNP25	purple	0.940076316460725	1.03449733339138e-21	-0.0393467	0.797473826135367
Endothelial	FER	blue	0.968597008246599	1.27395156189079e-27	0.028712621649301	0.85148144852656
Endothelial	DPH3	purple	0.962538699524527	5.32259522836412e-26	-0.157661	0.300972957962974
Endothelial	WWC2	green	0.931274377788719	1.80233432772275e-20	0.075578341387637	0.621705437744207
Endothelial	SAMD4A	green	0.927053045095662	6.22127397434137e-20	0.150695021131109	0.323101859557026
Endothelial	KIAA1328	magenta	0.9561449547173	1.47842407163263e-24	0.0650052935735675	0.67138572953753
Endothelial	HSPA1A	green	0.308114446965085	0.0394822451511501	0.257677488000909	0.0874689289006307
Endothelial	RSRP1	green	0.953380755161382	5.35209528507229e-24	0.123563069589602	0.418706654311909
Endothelial	TTTY10	green	0.272232625845485	0.0704289665007246	0.214294976416772	0.157489882863751
Endothelial	SYNE1	green	0.948804262802973	3.82811099511318e-23	0.0195918893962143	0.898354580475203
Endothelial	ITM2A	green	-0.883733	8.99404638499936e-16	0.0176775379957283	0.908241850314518
Endothelial	PRDX4	purple	0.958722261342723	4.1252617317682e-25	-0.0371964	0.808328250512343
Endothelial	CREG1	green	-0.969469	7.01604888647127e-28	-0.188607	0.214685371815729
Endothelial	GPSM3	purple	0.953774722832216	4.47706421772807e-24	-0.153489	0.314106481687584
Endothelial	FOXP2	blue	0.925008924192285	1.10390393131275e-19	0.0596044256748367	0.69732553809911
Endothelial	POMP	green	-0.961174	1.13343327339334e-25	-0.115293	0.45075046573689
Endothelial	TPI1	purple	0.971324474114361	1.85581503337357e-28	-0.153112	0.315310558667919
Endothelial	SCFD2	magenta	0.966024449919662	6.74910384551074e-27	0.125262304221163	0.412286897103174
Endothelial	MRPL41	purple	0.972821022325569	5.94977111280761e-29	-0.0904671	0.55451487214104
Endothelial	HIVEP2	green	0.916797087492461	9.48331182242486e-19	0.191493731565988	0.207622226199352
Endothelial	PLA2G7	green	-0.828686	2.10154968444973e-12	0.0159360289389557	0.917248388241647
Endothelial	CEP112	magenta	0.964898991172233	1.34484856098393e-26	0.127066517943032	0.40553255694065
Endothelial	CTIF	green	0.945596203393695	1.36930818097479e-22	0.0681588625189105	0.656409954556395
Endothelial	TRIO	magenta	0.95859361959484	4.40502320371555e-25	0.102110332371939	0.504485066587313
Endothelial	NEDD8	purple	0.972475454313094	7.78006191281709e-29	-0.153132	0.315247833508475
Endothelial	RTKN2	brown	0.488506527147827	0.000662575190127557	-0.417859	0.00428808688139328
Endothelial	RIMS1	yellow	0.890728320933058	2.54622254056592e-16	0.263588097928106	0.0801989498147109
Endothelial	CAPS	purple	0.893658356614626	1.46290135177444e-16	0.0615894482878122	0.687750059850985
Endothelial	ARPC3	purple	0.964227134921413	2.00817707370739e-26	-0.157671	0.300943525783188
Endothelial	CCNO	black	0.834351553312633	1.08296926835303e-12	0.316268142197458	0.0342977280486798
Endothelial	SCEL	greenyellow	0.827948864438588	2.28673781660835e-12	-0.421778	0.00390500370694461
Endothelial	CLEC16A	green	0.959269059729791	3.11390656853267e-25	0.121113081566076	0.42806192235485
Endothelial	SCAND1	purple	0.977599349546917	9.76452522124564e-31	-0.109416	0.474309901152572
Endothelial	MT1E	purple	0.79527205759111	6.77373814824444e-11	-0.243331	0.107245748756801
Endothelial	LSM2	purple	0.957665338346257	7.0297847305309e-25	-0.031252	0.838513588559466
Endothelial	CSGALNACT1	green	0.904525776048074	1.61105059458946e-17	0.327061274968496	0.0283104231108323
Endothelial	JOSD2	green	-0.870888	7.4902263497523e-15	-0.019008	0.901368844442664
Endothelial	LSM4	purple	0.975743011834352	5.3095623811076e-30	-0.120668	0.429772874554382
Endothelial	A1BG	green	-0.901917	2.80057543805059e-17	-0.0312004	0.838776725061881
Endothelial	TMEM14C	purple	0.969412573379888	7.29404255734642e-28	-0.089852	0.557221412395311
Endothelial	ULK4	blue	0.95584753290055	1.70458705335492e-24	0.178048046208005	0.241940317483579
Endothelial	SNRPB2	purple	0.95564172207799	1.87996251696868e-24	-0.139742	0.359907797716719
Endothelial	IGFBP2	green	-0.774053	4.48308083140135e-10	0.248811985865391	0.0993224615148662
Endothelial	FGD5	green	0.901662211177684	2.95325297421715e-17	0.223497102835715	0.139993465814789
Endothelial	MIPOL1	blue	0.969203018618367	8.42977916685946e-28	0.130018636476355	0.394619521255212
Endothelial	RABAC1	purple	0.975867097938885	4.76107440782544e-30	-0.149364	0.32744501765995
Endothelial	ADAMTSL1	yellow	0.922268960168392	2.32235773719734e-19	0.40685227451423	0.00554486568539919
Endothelial	GNG5	purple	0.964001983093145	2.29304496222665e-26	-0.163611	0.282863548589928
Endothelial	ITGA1	green	0.881148932180155	1.40461886602448e-15	0.201798048932453	0.18373833036477
Endothelial	COL4A3	greenyellow	0.906662724468197	1.01214504142338e-17	-0.178001	0.24206725453277
Endothelial	KIF26B	green	0.903400561322292	2.04882482344584e-17	0.325436327280474	0.029151915726228
Endothelial	ATRAID	purple	0.971055217725771	2.26276929073927e-28	-0.133437	0.382199794198973
Endothelial	LANCL1-AS1	greenyellow	0.712870679082847	3.93107779204589e-08	-0.325509	0.0291138034188341
Endothelial	PIBF1	magenta	0.94584308446318	1.24482840092789e-22	0.0952758976162154	0.533571264719333
Endothelial	PPP1CA	purple	0.978809132903184	2.99532032778095e-31	-0.156874	0.303425320226553
Endothelial	ZSWIM6	green	0.950356993639343	2.00524533048708e-23	0.152556787480546	0.317090116503225
Endothelial	CCRL2	purple	0.920409043762772	3.78887877621538e-19	-0.230311	0.127998440804352
Endothelial	RPL22L1	purple	0.968122549051963	1.75035061536767e-27	-0.161702	0.288595173400344
Endothelial	ABCB1	yellow	0.90862901801591	6.53385002831488e-18	0.327636738841275	0.0280172970557991
Endothelial	INPP5A	green	0.943597121845188	2.91558289845442e-22	0.11790581728053	0.440484348527827
Endothelial	NDUFAB1	purple	0.983215060239349	2.08414157979653e-33	-0.0799073	0.601819420285777
Endothelial	IFITM2	purple	0.945031357964648	1.70012731618796e-22	-0.158331	0.298898859263184
Endothelial	FAT4	green	0.944167432077536	2.35679392159712e-22	0.256484986811074	0.0889959889484343
Endothelial	SEMA3A	green	0.895947713827992	9.38065637592291e-17	0.244453852545516	0.105584996623357
Endothelial	TALDO1	green	-0.976262	3.35293401312991e-30	-0.280241	0.0622421057582196
Endothelial	LAMTOR1	purple	0.964625897870402	1.58437477964309e-26	-0.171263	0.260644109979343
Endothelial	PRDX2	purple	0.965872540574951	7.41728757901938e-27	-0.146905	0.335561150421186
Endothelial	CCDC141	green	0.777773619890925	3.26722124432084e-10	-0.199484	0.1889223396956
Endothelial	RBFOX2	blue	0.941402997916789	6.47863436246631e-22	0.292593762022867	0.0511205994979237
Endothelial	TCF12	blue	0.985240733736412	1.33882466069777e-34	0.225934775156727	0.135610152817539
Endothelial	MIEN1	purple	0.960768115436969	1.4114581123746e-25	-0.102436	0.503119005393386
Endothelial	BNC2	green	0.901279146643139	3.19813067225446e-17	0.386440102629739	0.00873887347092382
Endothelial	DLGAP2	yellow	0.911841103814336	3.12796386364996e-18	0.351088425112593	0.0180436042497129
Endothelial	PTPRB	green	0.926558818806965	7.15735493192914e-20	0.150912777177819	0.32239503643345
Endothelial	TCF7L1	green	0.952239683796743	8.89927963545858e-24	0.219084192302407	0.148194632484585
Endothelial	RAB7A	green	0.926559518056711	7.15594063505374e-20	0.0431184727216851	0.778527230307994
Endothelial	PACS1	green	0.944285131659719	2.2549181026294e-22	0.303535573464805	0.0426643607442607
Endothelial	NR5A2	yellow	0.914781399279453	1.55436585230239e-18	0.27698093069265	0.0654779224731136
Endothelial	CA4	brown	0.387075021831171	0.00861965560932914	-0.298655	0.0462831135258101
Endothelial	MS4A15	pink	0.657663114097358	9.17736386156262e-07	-0.366896	0.013172083637112
Endothelial	AURKAIP1	purple	0.976297196814082	3.2482033888169e-30	-0.129122	0.397914141075782
Endothelial	FGG	green	-0.312225	0.0367934391100367	-0.34637	0.0197637890997292
Endothelial	KCNQ3	blue	0.891179113541108	2.34053094289051e-16	-0.0272463	0.858987199615175
Endothelial	UGGT2	magenta	0.970257708014925	4.02708468797939e-28	0.089023854484947	0.560875385393804
Endothelial	SBF2	blue	0.951134231620053	1.43947182229947e-23	0.201832794017795	0.183661269196641
Endothelial	RBP7	purple	0.850515025460233	1.41259800285302e-13	-0.077886	0.611070254075016
Endothelial	CCDC7	green	0.965950534206552	7.06673060581359e-27	0.157602069633068	0.301156924537311
Endothelial	PHLPP1	green	0.944191423712757	2.335679047254e-22	0.146295892537388	0.33758949740369
Endothelial	MRC1	green	0.938686095829225	1.67030934982258e-21	-0.0710726	0.642690403389647
Endothelial	PLCXD3	green	0.896739922363254	8.02432405013596e-17	0.247168123830254	0.101650176289541
Endothelial	U2AF1	purple	0.711539626955283	4.27745132528632e-08	-0.112871	0.460382446783722
Endothelial	RPS6KA2	green	0.963449139908312	3.16468278050567e-26	0.167758972854668	0.270669326922432
Endothelial	PLCL1	green	0.936829778596609	3.11291731278509e-21	0.141953827795151	0.352277474133148
Endothelial	RAPGEF2	magenta	0.970609528323123	3.12894926317463e-28	0.160571480910592	0.292024287051724
Endothelial	ZNF608	blue	0.935269234693072	5.17837485540917e-21	0.247623091542507	0.101001788183606
Endothelial	GABARAPL2	green	-0.979974	8.98576357794178e-32	-0.101201	0.508306534574409
Endothelial	PVT1	yellow	0.905093605682114	1.42539530975046e-17	0.306085038446404	0.0408677502117354
Endothelial	TBC1D10C	purple	0.80394753116281	2.93180922994238e-11	-0.170572	0.262598943653875
Endothelial	PCDH17	green	0.887932162392702	4.25888320408651e-16	0.370692506911521	0.0121856173902993
Endothelial	ATP12A	black	0.794671925103267	7.16710469040573e-11	0.318444589061272	0.0330130159292494
Endothelial	LINC00342	green	0.923268402371229	1.7762383558708e-19	0.266886443003605	0.0763529962584073
Endothelial	SPECC1L	magenta	0.971610532175169	1.50021541991939e-28	0.125239305478175	0.412373409384948
Endothelial	MIR100HG	green	0.904192634962397	1.73042009613025e-17	0.200548625894087	0.186524795831165
Endothelial	ZBTB16	green	0.91653578033555	1.01177348592509e-18	0.154162228811256	0.311963268400722
Endothelial	DAD1	green	-0.973709	2.93887423755591e-29	-0.0166341	0.913636737062865
Endothelial	TBC1D5	blue	0.977763877516229	8.3468850604743e-31	0.143254839232698	0.347836154652569
Endothelial	KIAA1671	green	0.934828337238209	5.96545813994146e-21	0.308574194558806	0.0391737732795201
Endothelial	MICAL2	green	0.917801733846023	7.37854008524519e-19	0.0589980570318985	0.700259957033183
Endothelial	ARID1B	blue	0.978787926181197	3.05979144389598e-31	0.207561896263973	0.171268540103811
Endothelial	LYN	green	0.906713872368945	1.00081051370091e-17	0.0233564787395518	0.878956876438297
Endothelial	PIM2	purple	0.912408154317027	2.73855753746134e-18	-0.0709588	0.643223823710743
Endothelial	HINT2	purple	0.945256144643881	1.56027182261654e-22	-0.145086	0.341643288670378
Endothelial	POSTN	yellow	0.688168118930944	1.75208464938372e-07	0.698038842647477	9.81701536170502e-08
Endothelial	PTX3	purple	0.756125300511213	1.9017450875427e-09	-0.368801	0.0126687257900798
Endothelial	ARHGAP31	green	0.936602107647324	3.35553886245932e-21	0.130387486233563	0.393268154358088
Endothelial	ASAP2	green	0.952462719734856	8.06525726727491e-24	0.291461559182209	0.0520678887508146
Endothelial	ISCU	purple	0.973907605839864	2.50159452780607e-29	-0.162233	0.286994693392821
Endothelial	FAM120B	magenta	0.952301242130171	8.66123656904353e-24	0.157858725013487	0.300360397583986
Endothelial	SOD3	purple	0.864879256362832	1.87087334131425e-14	-0.129251	0.397441870196642
Endothelial	TMED2	purple	0.979618641088562	1.30687672738962e-31	-0.122101	0.424274313631367
Endothelial	ERC1	magenta	0.981936305563181	9.97722956059597e-33	0.184366231340559	0.225363388202761
Endothelial	MYO15B	green	0.93998789962381	1.06686542487275e-21	0.158234565920059	0.299196426134841
Endothelial	LDHA	purple	0.951047600948516	1.49404973613415e-23	-0.197624	0.193165257439809
Endothelial	ARL6IP1	green	-0.959034	3.51657101407046e-25	-0.10712	0.483688975335263
Endothelial	CD55	green	0.822482639805398	4.22659797697515e-12	-0.223674	0.139672137023329
Endothelial	SNAPIN	purple	0.948440032366756	4.44214549645211e-23	-0.124417	0.415471746818724
Endothelial	SAMSN1	purple	0.810726983352838	1.4796257242114e-11	-0.389287	0.00821522952328069
Endothelial	MAP2	blue	0.859875927713614	3.88002250763499e-14	-0.180029	0.236656689566432
Endothelial	FRYL	magenta	0.967545864688488	2.55884566198866e-27	0.218238957317856	0.149805035998054
Endothelial	CPM	green	0.849031633779764	1.71966884247483e-13	-0.0369116	0.809768622896849
Endothelial	ACTG1	purple	0.969055861308463	9.32591785851057e-28	-0.0164171	0.914759338328626
Endothelial	NAV1	green	0.915787225639715	1.21658168044987e-18	0.243661922926189	0.106754722255739
Endothelial	MRPL18	purple	0.952022082313677	9.79160324613287e-24	-0.102527	0.502738376236476
Endothelial	H2AFY	magenta	0.963091021168293	3.8888480398931e-26	0.0911579470419642	0.551482364396359
Endothelial	ST6GAL1	green	0.920299909104819	3.89783486907944e-19	0.377058191060143	0.010673282828732
Endothelial	ST6GALNAC5	greenyellow	0.922544096550016	2.15791129869903e-19	-0.199244	0.189466490382382
Endothelial	ACSL1	blue	0.898377422017257	5.78706401019553e-17	-0.172442	0.257325856775419
Endothelial	KIAA0825	blue	0.958205273045353	5.36327415202711e-25	0.176011850047257	0.24745457007918
Endothelial	RHOJ	green	0.883657198866869	9.11312768381941e-16	0.392009926271886	0.00773989442750025
Endothelial	RBP1	green	-0.906747	9.93611899375473e-18	0.0181548592679977	0.905775232150677
Endothelial	RAB11FIP3	green	0.973081709236788	4.84877328483356e-29	0.133567981403572	0.381728274001671
Endothelial	RNF7	green	-0.967407	2.80093787266557e-27	-0.117531	0.441947636001619
Endothelial	GSE1	green	0.958927120938777	3.71435619665662e-25	0.260316755878551	0.084161747832165
Endothelial	CXCL2	green	0.887180318494481	4.87930067469962e-16	0.00598697653414729	0.968864865879212
Endothelial	SCGB1A1	yellow	0.560869693444265	6.13676473124146e-05	0.301801655974314	0.04392266307126
Endothelial	PDE3A	green	0.902835244950513	2.30926066969062e-17	0.170664690589548	0.262337010053513
Endothelial	GLCCI1	green	0.872081487901334	6.21132478045524e-15	-0.00356242	0.981470804916639
Endothelial	SLC24A3	green	0.915416573557786	1.33201214127635e-18	0.0412444020447709	0.787926152122203
Endothelial	SLC9A9	green	0.905254744689277	1.37652715472863e-17	0.201204785434123	0.185057696444449
Endothelial	KANK1	green	0.89753731873468	6.84830585089057e-17	-0.0162811	0.915463074038678
Endothelial	DGKH	blue	0.95019966398821	2.14302848246951e-23	0.300130905774285	0.0451635523581327
Endothelial	MAP3K8	green	0.932964043408562	1.07354359163104e-20	0.0196803807814	0.897897895145259
Endothelial	KIF13A	magenta	0.955473826628133	2.03561250069511e-24	0.142535803993973	0.35028649393718
Endothelial	LINC00894	green	0.973278700060377	4.1485606815739e-29	0.123838759572354	0.417661250897767
Endothelial	HNRNPA1	purple	0.991375885141747	1.36751290131812e-39	-0.144754	0.34276138337857
Endothelial	MRPL12	green	-0.951138	1.43717321334572e-23	-0.0345181	0.821897279436833
Endothelial	TCF4	green	0.927159583257757	6.03533155094129e-20	0.32290138991563	0.0305060384593315
Endothelial	TACC2	green	0.877024552031087	2.80231837043554e-15	-0.132672	0.384959456307038
Endothelial	ZNF609	magenta	0.949094557260111	3.39744880987395e-23	0.23637577993058	0.117986351934958
Endothelial	TMCC1	blue	0.944688390061785	1.93670066716628e-22	0.278007548704959	0.0644447668120612
Endothelial	TMEM135	blue	0.949826728653009	2.5064988540938e-23	0.135804240668048	0.373735756009583
Endothelial	SH3D19	green	0.94628631629193	1.04787504549819e-22	0.0575039121525075	0.707508986531922
Endothelial	TMEM60	green	-0.95279	6.9743606921956e-24	-0.0185683	0.903639382615429
Endothelial	ITPR2	blue	0.946667606634677	9.02514339279551e-23	0.0821082819075073	0.591815960884256
Endothelial	JUNB	green	0.902334837692085	2.56572288918865e-17	0.114168248983193	0.455208953296751
Endothelial	TIAM2	brown	0.892400647838548	1.85940959002829e-16	0.121890945914422	0.425079012002123
Endothelial	ARHGAP6	blue	0.887800428769062	4.36188782609412e-16	-0.0976583	0.523340178881545
Endothelial	LINC00571	green	0.953449416905663	5.18871639651711e-24	-0.00419019	0.978206297694917
Endothelial	TOX2	green	0.887645395327805	4.48613584974229e-16	0.0192087220930309	0.900332398818564
Endothelial	MRPL11	purple	0.970299804445256	3.90793324911476e-28	-0.136334	0.371857528730682
Endothelial	SCGB3A1	yellow	0.838273957395429	6.74355077719223e-13	0.376583329054026	0.0107802550184762
Endothelial	PDCL3	green	-0.952753	7.09083644850614e-24	-0.120379	0.430886620466633
Endothelial	ACACA	green	0.940669451601184	8.40311446335191e-22	0.0154380193274244	0.919825872004035
Endothelial	EHBP1	blue	0.949444545281801	2.93940110597007e-23	0.10663674652085	0.485675677381588
Endothelial	PPIA	purple	0.986576622306941	1.76432891199971e-35	-0.158217	0.299251725223105
Endothelial	FBXL17	blue	0.971586573531692	1.52730956471592e-28	0.198489887960738	0.191181664125403
Endothelial	SLC22A23	green	0.912284454490711	2.81936203166195e-18	0.275586723510192	0.0669020503402134
Endothelial	DGCR6L	purple	0.945635671057074	1.34864323819969e-22	-0.0898983	0.557017669263254
Endothelial	KRT15	black	0.806750789175483	2.21690491623866e-11	0.36264626077159	0.0143560654543663
Endothelial	GAB1	green	0.941959569868606	5.30644061285865e-22	0.104860814469581	0.493011566854296
Endothelial	ARHGEF38	green	0.904003684397047	1.80180502795211e-17	-0.0199034	0.896746941723874
Endothelial	CP	turquoise	0.866938532708859	1.37396844182938e-14	0.572176289510062	4.01879276901337e-05
Endothelial	BMPR2	green	0.946574674220552	9.36063166161403e-23	0.250956242228171	0.0963481027635102
Endothelial	SLC22A3	green	0.819484442053742	5.8680061435694e-12	-0.0518938	0.734951364731569
Endothelial	SCAPER	magenta	0.950133164651133	2.20393337269629e-23	0.143013530493642	0.348657315415643
Endothelial	TRAPPC1	purple	0.977571059375213	1.00303106042779e-30	-0.140724	0.356509027975969
Endothelial	PRH1	blue	0.966269384267799	5.79090605897989e-27	0.122455804404422	0.422920285347963
Endothelial	FAM171A1	green	0.892226107363242	1.92188889695627e-16	0.390930961930637	0.00792531328549309
Endothelial	GLUL	green	0.856330522653433	6.39765335427226e-14	-0.107903	0.480478954280999
Endothelial	RBFOX1	green	0.866027731791139	1.57596541829173e-14	0.18381069524072	0.22678873323837
Endothelial	PHPT1	purple	0.970686407279364	2.95987666776376e-28	-0.0775257	0.61272550631097
Endothelial	NCALD	brown	0.836973435421968	7.90132234735944e-13	0.233290583976672	0.123002986190339
Endothelial	SFTA2	purple	0.878156946494285	2.32402423524082e-15	-0.405903	0.00566689890570464
Endothelial	RPTOR	magenta	0.965289201622105	1.06164132982408e-26	0.093215832928242	0.542496008359588
Endothelial	BACH2	green	0.914438322095838	1.68868926122249e-18	0.0814102452594003	0.59498053059521
Endothelial	TAGAP	purple	0.891178741264938	2.34069411654629e-16	-0.15002	0.325298720610469
Endothelial	NPNT	greenyellow	0.850189195738361	1.47523500109439e-13	-0.285126	0.0576330837494209
Endothelial	FOS	green	0.575928828601746	3.47996457797895e-05	-0.210744	0.164651825102089
Endothelial	CTSB	green	0.974544197801655	1.4802109585049e-29	0.143460986625735	0.347135586514011
Endothelial	MUC4	turquoise	0.827611009741713	2.37669977356286e-12	0.539931548767677	0.000129212325884194
Endothelial	RUNX1T1	green	0.90350697366629	2.00302734764249e-17	0.163402160483366	0.283487241134587
Endothelial	GTF2H5	purple	0.963615005147221	2.87461135954818e-26	0.00810422169795112	0.95786277021356
Endothelial	MACF1	magenta	0.979556346090153	1.39464243767515e-31	0.117144157379908	0.443463437447477
Endothelial	PTPN14	green	0.929322130958104	3.2270051085653e-20	0.337768622658342	0.0232557394388723
Endothelial	AP1S1	green	-0.888357	3.94247997473697e-16	0.0794377769675275	0.603962784753997
Endothelial	TSPAN8	black	0.870943453953253	7.42581428094936e-15	0.301078662399295	0.0444561889754908
Endothelial	ARAP3	green	0.946939578063254	8.10777815530566e-23	0.222821587046289	0.141226549598932
Endothelial	EPN2	green	0.935520573740445	4.77495527690181e-21	0.234950311514514	0.120284616347657
Endothelial	BUD31	purple	0.967987557198971	1.91425473408075e-27	-0.0820494	0.592082654415932
Endothelial	ARL2	green	-0.965187	1.12959936748963e-26	-0.0801434	0.600742563193293
Endothelial	SERPINF1	green	-0.874334	4.33945903276427e-15	0.123959465556317	0.417204006871514
Endothelial	ADGRF5	green	0.90007155741184	4.10241491445195e-17	0.0320818502785567	0.834284881051288
Endothelial	LILRB4	purple	0.877504382012892	2.58926122728302e-15	-0.0183586	0.904722798956937
Endothelial	SAMD5	green	0.93033893691657	2.38759952608598e-20	0.0959896901684207	0.530495714647183
Endothelial	MCU	blue	0.961531373959745	9.32233924970136e-26	0.163242745632924	0.283963641334737
Endothelial	NEDD4	green	0.939630889392908	1.20762164637534e-21	0.140495143159824	0.357298016998259
Endothelial	CD9	green	0.911823225377954	3.14105743662104e-18	0.182812590555366	0.229365135693566
Endothelial	TOX	blue	0.861052894430159	3.2765877555408e-14	-0.152219	0.318177132282881
Endothelial	LINC01376	green	0.971859620415198	1.24434307138772e-28	0.133449712704115	0.38215376936321
Endothelial	LRCH1	green	0.948372519737361	4.56580069629976e-23	0.217297684527282	0.151613530467843
Endothelial	LAMTOR4	purple	0.986917211919974	1.01874350292731e-35	-0.140744	0.356438726571749
Endothelial	CYP2B6	greenyellow	0.90096754912039	3.41140604875417e-17	0.0141486903168749	0.926502597123744
Endothelial	ATOX1	purple	0.975206530914466	8.45297887767585e-30	-0.134216	0.37940098844914
Endothelial	TSPAN9	green	0.942742205250252	3.99446520111808e-22	0.214010268424297	0.158055581090409
Endothelial	LIFR	brown	0.886263987476572	5.75147298097037e-16	0.194341797488565	0.200814018586638
Endothelial	ATF3	purple	0.806440090703569	2.28716675990026e-11	-0.0587858	0.701288058012135
Endothelial	C20ORF27	green	-0.935718	4.47980656533242e-21	-0.0706624	0.644614678567987
Endothelial	NBAS	magenta	0.96091234948061	1.30587394067626e-25	0.0336459188540368	0.826327268095324
Endothelial	LSAMP	blue	0.851361837059905	1.26135900209632e-13	-0.0561213	0.714240009598231
Endothelial	ERH	green	-0.965354	1.02046453055692e-26	-0.138872	0.362936301920151
Endothelial	ADCY4	green	0.894785769947186	1.17688368698751e-16	0.281708554462914	0.0608274789847834
Endothelial	VEGFC	green	0.877577034275772	2.55837153590372e-15	0.186708634315155	0.21942136960714
Endothelial	NLRP3	green	-0.737442	7.56137277469499e-09	-0.267278	0.0759063411440741
Endothelial	MYL6	purple	0.974444828743163	1.60795576837985e-29	-0.187099	0.218441876825568
Endothelial	ASAH1	green	0.925894343496075	8.62837278828147e-20	-0.0473176	0.757582746027799
Endothelial	HPGDS	purple	0.851497956985819	1.23852565256477e-13	-0.243917	0.106376243062794
Endothelial	NINJ1	purple	0.947997437210727	5.31465069736741e-23	-0.0708909	0.643542319737888
Endothelial	PRR13	purple	0.973671628384735	3.02877773679667e-29	-0.174936	0.250401186238863
Endothelial	LIMCH1	green	0.894031999675071	1.36150744187454e-16	0.0610899053073107	0.690155313591844
Endothelial	IRAK3	blue	0.896144251403068	9.02521659601072e-17	-0.0157369	0.918278872764624
Endothelial	TMED9	green	-0.958531	4.54870796035602e-25	-0.121289	0.427386119632527
Endothelial	OSMR	green	0.932566740263924	1.21409406891949e-20	0.223626244602191	0.139758643539132
Endothelial	EID1	green	-0.962216	6.38017215688858e-26	0.00117955956659861	0.993864283329824
Endothelial	CEMIP	green	0.892456684024206	1.83976245010587e-16	0.0898572740968373	0.557198283645709
Endothelial	CLDN4	purple	0.809219937589726	1.72657515445691e-11	-0.0532762	0.728157484112935
Endothelial	XPR1	blue	0.953203228955222	5.79750621977823e-24	0.224646842678607	0.137913135530636
Endothelial	GPC6	blue	0.85788236711212	5.14845587325619e-14	0.00991920609019589	0.948437431779605
Endothelial	OSBPL10	green	0.930578847743075	2.22229931820085e-20	0.342112915239793	0.0214325243273188
Endothelial	CACNA1D	blue	0.908986959883296	6.02708946084769e-18	0.0311174784773796	0.839199602617381
Endothelial	MAF1	purple	0.966735571214964	4.31330533857085e-27	-0.134297	0.37911100837407
Endothelial	PPIB	purple	0.972109902136399	1.02943868072389e-28	-0.163889	0.282035529656618
Endothelial	RPL36A	green	-0.9629	4.33639486033381e-26	-0.173395	0.254666286189017
Endothelial	VEPH1	greenyellow	0.804376174390457	2.80996223750807e-11	-0.3774	0.0105969506347568
Endothelial	FANCC	magenta	0.972613138361384	6.99441696515888e-29	0.0734952525168351	0.631371598142622
Endothelial	SEMA6A	green	0.917769915672691	7.43778285523865e-19	0.186537723372181	0.21985121683249
Endothelial	DKK2	blue	0.826512401018059	2.69288307573393e-12	0.0764176914995788	0.617828204150237
Endothelial	MFSD14C	magenta	0.962821355173109	4.53551783535264e-26	0.0694009304664162	0.650547538150734
Endothelial	DENND1A	green	0.946884374954285	8.28648836573786e-23	0.22241872013826	0.141965763701778
Endothelial	RNF181	purple	0.962515579008328	5.39242914242369e-26	-0.215078	0.15594175301201
Endothelial	TBCK	magenta	0.976647417415154	2.36677043031983e-30	0.181469848825469	0.232862734331704
Endothelial	HNRNPDL	green	0.902157797571074	2.66276047347707e-17	-0.059528	0.697694995020127
Endothelial	PRDM16	green	0.933639714365594	8.69348174525762e-21	0.0192476158850258	0.900131610901987
Endothelial	CASK	magenta	0.939171987083735	1.41459922781561e-21	0.0389485182136015	0.799481170056528
Endothelial	BLVRB	purple	0.921026824212127	3.22462335367193e-19	-0.378941	0.0102580726124628
Endothelial	RAB32	purple	0.928564885696185	4.02697164589802e-20	-0.247012	0.101873111189126
Endothelial	RASAL2	green	0.948886665165586	3.70085777379365e-23	0.242450445778721	0.108563277279326
Endothelial	PRDM5	green	0.95553364855264	1.97879826897836e-24	0.0828956880494841	0.588255209764471
Endothelial	SNAP25	yellow	0.675901762362116	3.49028723766215e-07	0.432175329861272	0.00303022235987903
Endothelial	ALDH2	green	0.951362829673385	1.3044111271494e-23	0.140052487633004	0.35883011369257
Endothelial	ATP11A	green	0.96262607509458	5.06637767406308e-26	0.0396854504263079	0.795767498229984
Endothelial	CD300A	purple	0.899651795874837	4.47001251215195e-17	-0.164751	0.279477278290172
Endothelial	AFAP1	green	0.931634041160477	1.61592527236544e-20	0.321492695372955	0.0312807941892505
Endothelial	LSM1	purple	0.974859611108497	1.13569815607984e-29	-0.0931268	0.542883261737183
Endothelial	PRNP	green	-0.935011	5.626669671687e-21	-0.0148494	0.922873251800592
Endothelial	PIGP	green	-0.945507	1.41711617473649e-22	-0.0838477	0.583962783275531
Endothelial	CCDC144A	green	0.933392526498636	9.39346021597901e-21	0.171986319713912	0.258604322668735
Endothelial	RBPMS	green	0.947969983118012	5.37382249345345e-23	0.22677165388894	0.134129143405207
Endothelial	FOSB	blue	0.121457867036932	0.426738310940967	0.0640200646309674	0.676090683321814
Endothelial	PIGR	purple	0.718528736756522	2.73091281298105e-08	0.113799012581066	0.456677965430831
Endothelial	EDF1	purple	0.99046923055716	1.16264589005147e-38	-0.108114	0.479617206042632
Endothelial	MRPL57	purple	0.973016366608383	5.1049186941115e-29	-0.146011	0.33854159040887
Endothelial	PFDN5	purple	0.97839672406555	4.51487417599279e-31	-0.21857	0.149172405540865
Endothelial	ROBO1	blue	0.903043856255948	2.20969794787278e-17	0.28934648995219	0.0538754332932228
Endothelial	RAB13	green	-0.975578	6.13181456837479e-30	-0.0276198	0.857074430487949
Endothelial	DUSP14	green	-0.888967	3.52603440270103e-16	0.0541834673847336	0.723709580783634
Endothelial	SSNA1	purple	0.955327916066773	2.1807683963577e-24	-0.170555	0.262647379791252
Endothelial	PRELID2	green	0.941552506151785	6.14161566412096e-22	0.214610171463131	0.156865336222249
Endothelial	PERP	purple	0.855071644481198	7.61637454706331e-14	-0.00954852	0.950361890161967
Endothelial	GKN2	purple	0.787749162390273	1.35651696074833e-10	-0.449962	0.00192721475358784
Endothelial	PLSCR4	green	0.902680942792443	2.38562616955517e-17	0.291842052614104	0.0517479711935916
Endothelial	TMEM70	green	-0.929417	3.13792812252322e-20	0.0365466658364442	0.811614974758227
Endothelial	MEA1	purple	0.952726359976605	7.17523140968765e-24	-0.122368	0.423255628403269
Endothelial	PLCG1	green	0.949651746260195	2.69658119999788e-23	0.160401388269825	0.292542519608212
Endothelial	MYO9A	blue	0.963183707740628	3.68760527334119e-26	0.0942326777283167	0.538081810249013
Endothelial	SERP1	purple	0.964361967502317	1.854065110866e-26	-0.200238	0.187221228425261
Endothelial	TMPRSS4	turquoise	0.896208800634833	8.91129220458842e-17	0.435904167156684	0.0027614149185868
Endothelial	EEF2	purple	0.982755759781755	3.70706398633113e-33	-0.122531	0.422634641852387
Endothelial	ARHGEF12	green	0.916927031708819	9.1820666362955e-19	0.316522127383576	0.0341457145729263
Endothelial	STARD9	green	0.941957201396589	5.31097162859024e-22	0.242428421743607	0.108596370914393
Endothelial	PIEZO2	green	0.892197916670729	1.93216501343929e-16	0.250962307906415	0.0963397875144326
Endothelial	VPS13D	magenta	0.918987984791802	5.46358890799372e-19	0.155084065879064	0.309043413750087
Endothelial	MT1M	purple	0.571545658450062	4.1164965149006e-05	-0.327408	0.0281333941937662
Endothelial	CD24	purple	0.788727972485579	1.2412913955257e-10	0.239024030009114	0.113805033882418
Endothelial	LAPTM4A	green	-0.969029	9.50040551026726e-28	-0.0550409	0.719514373255878
Endothelial	EPB41L4A-AS1	purple	0.942333986228586	4.6345704161199e-22	-0.134153	0.37962737338322
Endothelial	ANKRD36	green	0.95388559448351	4.25649944736001e-24	0.116566302787239	0.445730993685964
Endothelial	ZNF524	purple	0.89223430362244	1.91891092026737e-16	0.00824949808931781	0.957108113759648
Endothelial	ANKS1A	green	0.944651821019739	1.96369574557066e-22	0.171177057055288	0.260885691894781
Endothelial	CCDC115	purple	0.945213419014219	1.58598273928204e-22	-0.221759	0.143181815633246
Endothelial	SOCS3	purple	0.89404576889489	1.35790136515011e-16	-0.0234009	0.87872856978195
Endothelial	DCLK2	green	0.971659571344094	1.44617877180054e-28	0.20212978595705	0.183003512510054
Endothelial	ERCC6L2	magenta	0.963980451026216	2.32221731346554e-26	0.140140876574685	0.358523868511391
Endothelial	LMCD1-AS1	green	0.965289662466338	1.06134319507262e-26	0.202541364692941	0.182094763526146
Endothelial	UXT	green	-0.972321	8.76221627076319e-29	-0.14147	0.353937577660763
Endothelial	CAPN13	yellow	0.779276744719297	2.87023514389614e-10	0.278325487188614	0.064127449142991
Endothelial	GHITM	purple	0.964037094086753	2.24622228879356e-26	-0.199577	0.188713562224765
Endothelial	EIF4A3	purple	0.937699326960526	2.33105839564286e-21	-0.216943	0.152299620204512
Endothelial	SNX3	purple	0.970896400319655	2.54125736342953e-28	-0.0913731	0.550539744238478
Endothelial	AC098617.1	blue	0.935228999347659	5.2458902220141e-21	-0.00161829	0.991582211827844
Endothelial	MAP2K5	blue	0.92902294485926	3.52311412994876e-20	0.218031237674759	0.150202762226374
Endothelial	CORO1C	green	0.939638720929812	1.20435289826539e-21	0.118671990220956	0.43749880943524
Endothelial	LINC01515	green	0.883958278392007	8.64619343203585e-16	0.352189678818442	0.0176608394975191
Endothelial	LSM5	purple	0.958656859701591	4.26530966956861e-25	-0.0738736	0.629611496764363
Endothelial	EIF1B	purple	0.912879191513764	2.45053386210178e-18	-0.30015	0.0451491249250701
Endothelial	YAP1	blue	0.946225260576037	1.07312628790476e-22	0.150887913271488	0.32247569394053
Endothelial	DOCK6	green	0.920994490702348	3.25205918413836e-19	0.211429860370547	0.163250540110114
Endothelial	PROM1	turquoise	0.890142097410591	2.83942522756585e-16	0.413144509752991	0.00479208312421074
Endothelial	CNTN4	greenyellow	0.921298602410075	3.00254454312481e-19	-0.132932	0.384020750048499
Endothelial	FMNL2	green	0.911962730616856	3.04025395233932e-18	0.113644342239635	0.457294086388611
Endothelial	C16ORF91	purple	0.923864521686062	1.51114102913552e-19	-0.135349	0.375355699941882
Endothelial	CIB1	purple	0.964557902311546	1.65004109956116e-26	-0.13114	0.390518238667974
Endothelial	KDM4C	magenta	0.944914579758101	1.77740958815538e-22	0.158971356227872	0.296923038306661
Endothelial	BGN	purple	0.759844429006748	1.42375606068447e-09	0.205003802490893	0.17672518312595
Endothelial	KAZN	green	0.912657119140194	2.58254271189539e-18	0.24283240475594	0.107990563533658
Endothelial	MYO18A	green	0.966450186141687	5.16824787691773e-27	0.194375621797478	0.200734118605684
Endothelial	FLT1	green	0.864735963150555	1.91113584930949e-14	0.248024269033124	0.100432698989494
Endothelial	LTA4H	green	0.978221970636191	5.35947939903934e-31	0.0401926579820044	0.793214078196107
Endothelial	ZFP36L2	green	0.914160651741187	1.80539998271861e-18	0.180189280938927	0.236232215688343
Endothelial	DHRS9	green	-0.760276	1.37625736714935e-09	0.24043772377779	0.111619538665856
Endothelial	MT-ATP8	purple	0.422727142361893	0.00381687920270532	0.194850258974918	0.19961528740186
Endothelial	RAPGEF6	magenta	0.942719184659391	4.02820361579054e-22	0.0441982955946569	0.773125717596927
Endothelial	CHCHD5	purple	0.960658556780746	1.49703665013265e-25	-0.165419	0.277504417959157
Endothelial	RFTN1	green	0.920794036959077	3.4271610061825e-19	0.119027382644965	0.43611777840503
Endothelial	FCGR2B	purple	0.781663561603757	2.33172439218802e-10	0.0544511551206843	0.722398975558325
Endothelial	PCNA	purple	0.965238610593216	1.0948595170751e-26	-0.120463	0.430563337288589
Endothelial	LRRC1	green	0.902177044375451	2.65204480220878e-17	0.202527623091387	0.182125052225096
Endothelial	NPM1	purple	0.970213214101407	4.15677880483569e-28	-0.173631	0.254008735272639
Endothelial	INPP4B	blue	0.901931410231854	2.79192463097022e-17	0.236344272208008	0.118036789667069
Endothelial	HDAC4	green	0.963883136889543	2.45852503341575e-26	0.133196449115911	0.383065879032489
Endothelial	MDH2	purple	0.952927315912995	6.56043844397885e-24	-0.128477	0.40029654359183
Endothelial	HLA-DRB1	green	0.933664688624729	8.62558591029426e-21	0.0956934197465669	0.531771213640874
Endothelial	PPP1R14A	green	-0.789272	1.18125471628216e-10	-0.287805	0.0552239927125281
Endothelial	ZHX3	green	0.957858814342745	6.3827877144571e-25	0.162251177579329	0.286938607326267
Endothelial	MIF4GD	purple	0.926725287812611	6.82804456448342e-20	-0.129969	0.394802416155402
Endothelial	ETFB	green	-0.976722	2.21199481753347e-30	-0.142929	0.348945073888225
Endothelial	HULC	green	0.934293224550315	7.07377647370156e-21	0.00105057738338459	0.994535199393639
Endothelial	PIP5K1B	green	0.865556986276656	1.69108337344162e-14	-0.15139	0.320848740499036
Endothelial	NR6A1	green	0.91531046651602	1.36692493314953e-18	-0.0321453	0.833961883802191
Endothelial	WWC1	green	0.871075803272738	7.2738082637912e-15	-0.0547563	0.720906118136747
Endothelial	CBR1	green	-0.954426	3.32212983547161e-24	-0.205074	0.176574198999624
Endothelial	HIP1	green	0.910476929997131	4.29133710808035e-18	0.226241297932354	0.135066297613866
Endothelial	LMBR1	green	0.958565404484269	4.46875278784331e-25	0.193669091312303	0.202407740927257
Endothelial	HLCS	magenta	0.962089881133196	6.84518354427559e-26	0.09942818297058	0.515802859857456
Endothelial	PLAC8	green	-0.906548	1.03803270814716e-17	-0.213729	0.158615788494515
Endothelial	ZMYND10	purple	0.868335779143392	1.11105457825537e-14	-0.086273	0.573091903042053
Endothelial	KANSL1L	green	0.921693971373539	2.70525476988826e-19	0.00778608193830805	0.959515513480903
Endothelial	GTF2A2	purple	0.96544809682514	9.63436500927132e-27	-0.0698463	0.648450670753003
Endothelial	NFIA	blue	0.912661928605688	2.57961359002423e-18	0.431603243733862	0.00307343720124399
Endothelial	PFDN2	purple	0.958825856754953	3.91234508336579e-25	-0.134719	0.377602387380093
Endothelial	FAAH2	green	0.941474554605026	6.31519611825227e-22	0.152303620298033	0.31790342270723
Endothelial	ANKRD28	green	0.887848687513381	4.32388246540971e-16	0.0934369388073252	0.541534691968387
Endothelial	ACTN1	green	0.907057634453164	9.27699504041798e-18	0.198253079992798	0.191722568727835
Endothelial	JUN	green	0.779401957571749	2.83929904541552e-10	0.0629671941709554	0.681132176493771
Endothelial	TNFRSF12A	purple	0.812523819384747	1.22870333590023e-11	-0.277822	0.0646305434282247
Endothelial	MLLT10	green	0.937361001563023	2.61000320488885e-21	0.127764116294364	0.40293819273623
Endothelial	EIF3K	purple	0.985366722630807	1.11484695764827e-34	-0.107595	0.481741031936417
Endothelial	PPDPF	purple	0.967085690427399	3.44764912955154e-27	-0.21349	0.159093364531409
Endothelial	ADCY9	green	0.952757863738491	7.07535597970441e-24	0.0643219017842826	0.674647955041068
Endothelial	MKKS	green	-0.950864	1.61617397385528e-23	-0.118803	0.4369883706751
Endothelial	MIF	purple	0.95070372757461	1.73073582399692e-23	-0.22006	0.146351725780787
Endothelial	ISCA2	purple	0.945995304419173	1.17352369404687e-22	-0.167913	0.270222564767338
Endothelial	SNRPF	green	-0.888519	3.82742204800168e-16	-0.13454	0.378242403729401
Endothelial	PLEK	purple	0.840618778230534	5.04988134387012e-13	-0.288128	0.0549392738039132
Endothelial	LINC01004	green	0.961961660937099	7.35118924017819e-26	0.100928332630067	0.509457099004433
Endothelial	SYF2	purple	0.960885498635888	1.324942200203e-25	-0.171401	0.260252753742223
Endothelial	CLASP1	magenta	0.957883955402058	6.30299870117722e-25	0.209377790651239	0.16746962653855
Endothelial	CNTN6	greenyellow	0.787175675636244	1.4286281352089e-10	-0.225523	0.136342910072204
Endothelial	KIAA1324L	green	0.894807555059851	1.1719183551938e-16	0.0307517268925185	0.841065173835135
Endothelial	LINC00511	yellow	0.908987932981688	6.02576406399893e-18	0.356852354256927	0.0161153690032385
Endothelial	RNF144A	green	0.956498649596006	1.24658686700547e-24	0.191937795737701	0.206550214275207
Endothelial	RNASE1	green	-0.90439	1.65866463076296e-17	-0.0603228	0.693854692408699
Endothelial	PELI2	green	0.948569097136469	4.21456318638722e-23	0.104044001518801	0.4964047183846
Endothelial	UTRN	blue	0.972363592729143	8.4795296692391e-29	0.124722527813436	0.414320060621854
Endothelial	ARMC3	black	0.925582249985023	9.41447030070935e-20	0.370385789000984	0.0122628894701541
Endothelial	HIST1H1E	red	0.791314935229412	9.79496398808484e-11	-0.0330339	0.829439236404085
Endothelial	LTBP1	green	0.817993705130353	6.89241003276725e-12	0.463476009583979	0.00134414236383144
Endothelial	EIF4G3	blue	0.954819074043703	2.76793717449254e-24	0.258097194848411	0.0869363507173784
Endothelial	JAK2	green	0.946380401137806	1.01006703279128e-22	0.207526707332244	0.171342766089653
Endothelial	KANTR	magenta	0.978561002404127	3.83774362047867e-31	0.114709984213395	0.453058305213025
Endothelial	TRAPPC10	green	0.953681895252208	4.67005422735209e-24	0.118200709841029	0.439333911677958
Endothelial	SCN1A	greenyellow	0.788759347128263	1.23775496953852e-10	-0.389501	0.00817693314646458
Endothelial	FAF1	magenta	0.975518659015718	6.45739914911801e-30	0.199862353731487	0.188068072280211
Endothelial	ATP6AP2	purple	0.973223360172957	4.3348768755013e-29	-0.129952	0.39486484432186
Endothelial	SNRPB	purple	0.981624585993564	1.43691060783163e-32	-0.0412643	0.787826257693168
Endothelial	KLHL29	green	0.926192572163595	7.93577330219398e-20	-0.101962	0.505108361401228
Endothelial	FAM172A	blue	0.980094719170476	7.89923086430303e-32	0.198746607683594	0.190596502729826
Endothelial	CDK17	green	0.937699774510195	2.33070890790817e-21	0.2186620808491	0.148997268128658
Endothelial	POLA1	green	0.960439868193048	1.68284867828621e-25	0.188685723657802	0.214491190573531
Endothelial	TAF9	purple	0.968430202360393	1.42527804509629e-27	-0.224975	0.137324015807852
Endothelial	SIGLEC10	purple	0.696605479034564	1.0693780060339e-07	-0.488297	0.000666650629607819
Endothelial	SVBP	green	-0.945466	1.43952036420966e-22	-0.0793903	0.60417977449659
Endothelial	LRBA	blue	0.981259138689137	2.18644623492215e-32	0.117148064717525	0.443448126356323
Endothelial	C14ORF119	purple	0.965804603237443	7.7360777897674e-27	-0.1348	0.37731431524939
Endothelial	SIK3	green	0.947286396513197	7.06613459193982e-23	0.171423999120653	0.260188125809694
Endothelial	STOML2	purple	0.972853663017297	5.79989876595589e-29	-0.150062	0.325160662047729
Endothelial	AFAP1L1	green	0.909532248992035	5.32618646210092e-18	0.361952473614085	0.0145577211879544
Endothelial	SMURF1	blue	0.95461778765437	3.03940374637255e-24	0.175793901252382	0.248049787971466
Endothelial	SPATA5	blue	0.93681389306862	3.1292897548147e-21	0.122942138435923	0.421066628306951
Endothelial	TMEM59	purple	0.968839446879477	1.08101830006999e-27	-0.0906037	0.553914524953875
Endothelial	RIC1	blue	0.946444989313827	9.84867194354952e-23	0.163299936241716	0.283792671076849
Endothelial	SYT8	green	-0.316257	0.0343041439615454	0.00998537078762118	0.948093957671654
Endothelial	EBF1	green	0.878921181796351	2.04612282474838e-15	0.30482437971204	0.0417482511038501
Endothelial	HES1	purple	0.896246048356587	8.8461748157824e-17	-0.127688	0.403222193212118
Endothelial	CALM2	purple	0.982085733302203	8.35773710039612e-33	-0.128775	0.399195049343249
Endothelial	IVNS1ABP	green	0.882406810608824	1.13204884537629e-15	0.10051307656829	0.511209711568509
Endothelial	RELL1	green	0.908479828342818	6.75678815121204e-18	0.227622715429705	0.132635442686581
Endothelial	SIPA1L2	green	0.886395576043441	5.6177227097536e-16	0.335328518464484	0.0243355617404398
Endothelial	MRPS7	purple	0.940106150231978	1.02378790501406e-21	-0.193127	0.203698227228789
Endothelial	PBX1	green	0.90555626016846	1.28932692990145e-17	0.390868922899392	0.00793609027439566
Endothelial	IER2	green	0.874835483867565	4.00309942381713e-15	0.116380687102396	0.446460716974701
Endothelial	MIR181A1HG	blue	0.87923828941395	1.94031749689577e-15	0.0193438678749979	0.899634739715378
Endothelial	PRICKLE1	green	0.882962838250724	1.02827450001555e-15	0.223200413420447	0.140534053771219
Endothelial	ING2	purple	0.911156118823948	3.66855145080158e-18	-0.0972052	0.525278653675607
Endothelial	IQGAP1	green	0.93714356630955	2.80572296646394e-21	0.122312894390107	0.42346586029571
Endothelial	EML1	brown	0.906743289722175	9.94346210357613e-18	0.224091183377444	0.13891565254358
Endothelial	SRSF7	green	0.912995656645752	2.38388866370755e-18	0.117068824903122	0.44375868834538
Endothelial	TSPAN18	green	0.872318463779616	5.98330101233695e-15	0.346481138936688	0.0197218332045682
Endothelial	C3ORF14	green	-0.829126	1.99776877256532e-12	-0.281901	0.0606440258124618
Endothelial	SLCO3A1	green	0.917908072618803	7.18378051981021e-19	0.112460443250339	0.462024966526864
Endothelial	MYO1E	green	0.915083382355911	1.44458483310412e-18	0.343536398267826	0.0208618732703576
Endothelial	TANC2	green	0.919422104811167	4.88905548879371e-19	0.0639512849437468	0.676419598870959
Endothelial	ANAPC15	purple	0.962730497992393	4.77556129788077e-26	-0.241021	0.110727625544261
Endothelial	ARHGAP32	blue	0.906257921022383	1.1062473223041e-17	0.117293200019884	0.442879613095825
Endothelial	VAV3	green	0.906406593014571	1.07076087968025e-17	0.101335834445288	0.507740168991174
Endothelial	OSCAR	purple	0.854298919648882	8.46993246859443e-14	-0.170342	0.263255176959167
Endothelial	COL4A4	greenyellow	0.920709534059547	3.50362794142687e-19	-0.219846	0.146754525940362
Endothelial	NUDCD2	purple	0.947018678554966	7.85808238301502e-23	-0.162481	0.286248329857914
Endothelial	CADM1	green	0.878230247963311	2.29589362170497e-15	-0.0825035	0.5900277197578
Endothelial	C8ORF34	greenyellow	0.89540029001855	1.0441990397469e-16	-0.0395679	0.796359346586196
Endothelial	EYA2	yellow	0.814333050196081	1.01697738554077e-11	0.526620160529765	0.000202323278120714
Endothelial	NHS	yellow	0.944063668325434	2.45022390363999e-22	0.483327966804592	0.000770398693416769
Endothelial	IGKC	purple	0.287649187688822	0.0553622005303025	0.187251342946121	0.218060296863319
Endothelial	CACNA2D2	greenyellow	0.801348837552904	3.78393302339035e-11	-0.319157	0.0326011841549527
Endothelial	BRAF	green	0.949468530552345	2.91026336624568e-23	0.0973489026637502	0.524663326875101
Endothelial	SMG6	magenta	0.964434707435234	1.77566834240274e-26	0.213605325171642	0.158862734826292
Endothelial	ADGRB3	blue	0.911982942633442	3.02590641856548e-18	-0.0503938	0.742345914060854
Endothelial	ATP8A1	blue	0.942759719497724	3.96897690568897e-22	-0.000134553	0.999300087212295
Endothelial	ICAM4	purple	0.763181070361232	1.09324054485481e-09	-0.0224369	0.883688917857545
Endothelial	TRAF3IP2-AS1	blue	0.930775888793782	2.09472957256137e-20	0.0891322165387156	0.560396644722636
Endothelial	MAST4	green	0.963279759919662	3.48953427358497e-26	0.188877476124987	0.214017158421499
Endothelial	SIPA1L1	blue	0.945711566606862	1.30973559899365e-22	0.0931627280460613	0.542727018049919
Endothelial	PSAP	green	0.979611348032444	1.3168729776644e-31	0.096993558294507	0.526185047227127
Endothelial	EGR3	purple	0.554647204371002	7.69660110981091e-05	0.363605288316601	0.0140812308847953
Endothelial	TSR3	purple	0.878230425910546	2.29582572575359e-15	-0.00819363	0.957398308335772
Endothelial	CACNA2D3	green	0.813180741949528	1.14743019166231e-11	-0.209611	0.166985395002834
Endothelial	SIK2	green	0.915968845170172	1.1635510605702e-18	0.168132504257128	0.269588514937696
Endothelial	MID1	blue	0.874982054424981	3.90946220694846e-15	0.318808053451415	0.0328023922461181
Endothelial	KANSL1	blue	0.954998081126744	2.546042828105e-24	0.181960914027607	0.231579390782356
Endothelial	NDUFB5	green	-0.98382	9.52382143521472e-34	-0.0607573	0.691758391448809
Endothelial	CACNB2	blue	0.882376998245862	1.1378841732706e-15	-0.0637849	0.677215306136335
Endothelial	NDUFC1	green	-0.967319	2.96573926010189e-27	-0.0635027	0.678566446628904
Endothelial	GDF15	purple	0.698253723237375	9.69150849099685e-08	0.0865414456280916	0.571894558105092
Endothelial	BCR	green	0.930684271942349	2.15315402924191e-20	0.26017403065592	0.0843380581161306
Endothelial	AFF1	blue	0.967229636226231	3.14209819247612e-27	0.190467032027567	0.210115662906938
Endothelial	PRDX3	purple	0.954718859857823	2.90007202440571e-24	-0.155721	0.307036872888576
Endothelial	PPIC	green	-0.966915	3.84710718712016e-27	-0.107021	0.484094375228933
Endothelial	GMDS	green	0.918912578997807	5.56970279588106e-19	0.307144447000572	0.0401396015518965
Endothelial	FAM135A	blue	0.946985198023989	7.96286402562026e-23	0.0768768961996961	0.615711316146546
Endothelial	AC007952.4	green	0.887441465341392	4.65468560304393e-16	0.0519987052001621	0.734435152748785
Endothelial	DPYSL3	green	0.753826773732949	2.26851691815042e-09	0.481831605043306	0.000804351030396038
Endothelial	NBPF15	green	0.912342410385027	2.78122569156113e-18	0.0910442635109971	0.551980845617409
Endothelial	CD163	greenyellow	0.740812531268973	5.94601325892791e-09	-0.261618	0.0825674394909816
Endothelial	CC2D2B	green	0.915063841053691	1.45145994868429e-18	0.283710981767613	0.058939087386307
Endothelial	ZC3H11A	green	-0.936458	3.51791223255255e-21	-0.126201	0.408765368656747
Endothelial	ZNF428	purple	0.919358906559058	4.96896973836868e-19	0.0618836546650997	0.686334905879154
Endothelial	NEDD4L	blue	0.904685980113096	1.55646985018468e-17	0.0994742366037438	0.515607462258878
Endothelial	PLEKHA7	green	0.933423255251179	9.30361516127381e-21	0.0975652293793657	0.523737999141424
Endothelial	NHSL1	blue	0.9333183882816	9.61363326510676e-21	0.197258452282942	0.194006302530937
Endothelial	PALD1	brown	0.873397278796524	5.04178348834128e-15	0.255089740068805	0.0908088845086423
Endothelial	SORBS2	green	0.918413006760784	6.32375082003951e-19	0.198033662020683	0.19222472025465
Endothelial	DNAJA1	purple	0.934234577358649	7.20650218148074e-21	-0.0882321	0.564379141238522
Endothelial	ROMO1	purple	0.981272877909678	2.15253338754574e-32	-0.0977473	0.52295997490685
Endothelial	RFX3-AS1	blue	0.965000584112568	1.26487713254183e-26	0.160314753591985	0.292806704080809
Endothelial	DDAH2	purple	0.952904764425401	6.6268487768058e-24	-0.0813198	0.595391166164938
Endothelial	SEC11C	purple	0.96402171763229	2.26661461491624e-26	-0.171716	0.259364828760505
Endothelial	RASD1	purple	0.703826890394815	6.91422095452939e-08	0.00281276131385668	0.985369507348771
Endothelial	HERC2	green	0.95446094335145	3.26829989486208e-24	0.227791183991283	0.132341241999808
Endothelial	STXBP6	brown	0.787109429964804	1.43718653390097e-10	-0.00960844	0.950050803014381
Endothelial	PIK3C2B	green	0.913528380506848	2.10038010118563e-18	0.269088481872623	0.0738671820488832
Endothelial	ATAD2B	magenta	0.954514923308128	3.1877319012891e-24	0.136924615294392	0.369769326954695
Endothelial	MVB12B	green	0.9388572041114	1.57562083112162e-21	0.0699005445541701	0.648195261850958
Endothelial	MCTP2	blue	0.887585633179798	4.53492076001892e-16	0.149991656629065	0.325391590239329
Endothelial	PLAC9	green	-0.779681	2.77143445118966e-10	0.0352330282514883	0.81826998412755
Endothelial	WDR27	green	0.957784630705932	6.62386132990603e-25	0.24159009638157	0.109861783044676
Endothelial	TUBA4A	purple	0.9521908690686	9.09245497235047e-24	-0.170493	0.262825944714364
Endothelial	VMA21	green	-0.941169	7.04232668208373e-22	-0.0185608	0.903678122624126
Endothelial	ARHGEF18	green	0.980048314558471	8.30095604068987e-32	0.0401698204458075	0.793329002780802
Endothelial	CFAP161	brown	0.820583795035304	5.20650266943388e-12	0.0358858408421965	0.81496116526262
Endothelial	JAZF1	blue	0.946038765441906	1.15388904930634e-22	0.127346313836091	0.404490843411242
Endothelial	HSP90AA1	purple	0.907767168992039	7.92507007884967e-18	-0.0441773	0.773230798920039
Endothelial	PAM	blue	0.952759810119551	7.06922900778071e-24	0.206096402463319	0.174379481103858
Endothelial	SRI	purple	0.945823301696251	1.25439227319015e-22	-0.13909	0.362174779253552
Endothelial	KDM6A	blue	0.950704066261983	1.73048606028645e-23	0.131636464380722	0.388712356893328
Endothelial	H2AFJ	purple	0.975460786075543	6.78977994254583e-30	-0.187314	0.217904290165276
Endothelial	SLC25A11	purple	0.973309910384715	4.04687257151712e-29	-0.0869525	0.570063195021543
Endothelial	DLGAP1	blue	0.866825867549857	1.39755589537486e-14	-0.0648665	0.672047630299358
Endothelial	TTC6	greenyellow	0.873938129408572	4.62435322292819e-15	0.177073349101089	0.244569411793111
Endothelial	FAM193A	green	0.955856339737101	1.69744132882503e-24	0.183834707103929	0.22672699780574
Endothelial	FLI1	green	0.945294296208077	1.53764887148421e-22	0.259210092156498	0.0855363830586466
Endothelial	ARHGAP29	green	0.94478669705582	1.86586943777313e-22	0.116794121561487	0.444836251263613
Endothelial	KIAA1109	green	0.924186477829869	1.38406067189652e-19	0.1450812364016	0.341659550579576
Endothelial	RFX3	blue	0.926382800583331	7.5219416189765e-20	0.220735034758064	0.145086173458325
Endothelial	PRELP	green	-0.704629	6.58190345427157e-08	-0.302769	0.0432171228229594
Endothelial	ATG7	blue	0.916711576356559	9.68664355071135e-19	0.0858518781920013	0.574972998313967
Endothelial	MTUS1	green	0.88513752127694	7.02663090085506e-16	0.183741196912119	0.226967481309555
Endothelial	GAB2	green	0.908665416989595	6.48052730590248e-18	-0.0858914	0.574796422295307
Endothelial	HAGHL	purple	0.878432837575349	2.21981470618663e-15	-0.0915047	0.54996302996199
Endothelial	EPB41L5	green	0.854719289619309	7.99496906129249e-14	-0.173091	0.255512279366323
Endothelial	FBXO6	green	-0.952328	8.55801373490076e-24	-0.16881	0.26763583602061
Endothelial	RSL24D1	purple	0.96041148039633	1.70851980083898e-25	-0.169505	0.265640555573062
Endothelial	CECR2	green	0.921349988657601	2.96222215620421e-19	-0.103985	0.496651261249793
Endothelial	SERF2	green	0.9788378297988	2.91013581025926e-31	0.109465086827221	0.474111267380931
Endothelial	FTO	green	0.933761242319273	8.36780248057221e-21	0.251250422888575	0.0959454572200869
Endothelial	SMAD1	green	0.901834213648283	2.84918422389692e-17	0.278354150038362	0.0640989035120158
Endothelial	JTB	purple	0.978692810202288	3.36557060892348e-31	-0.131701	0.388479311760581
Endothelial	FLT4	brown	0.941977784544785	5.27171756525754e-22	0.267809568378126	0.0753030166873823
Endothelial	DYRK1A	blue	0.947362085744713	6.85638375644088e-23	0.148915524323951	0.328914479455469
Endothelial	ASAP1	green	0.92802634711585	4.70694056502355e-20	0.240597792416718	0.111374108285683
Endothelial	LMNA	green	0.746671451625271	3.88096440513724e-09	-0.018164	0.90572786187929
Endothelial	RGS6	brown	0.609475953918864	8.84696305162784e-06	0.0250845947015874	0.870075180441799
Endothelial	IDO1	green	-0.0614162	0.688583955120198	0.244083665270403	0.106130557775175
Endothelial	SLC11A1	green	0.803967117281942	2.92613477626477e-11	-0.168304	0.269093458003484
Endothelial	PGRMC1	purple	0.940991824722334	7.49854428376546e-22	-0.0929377	0.543706424935724
Endothelial	CHRM3	blue	0.819623468351644	5.78017425743024e-12	-0.161673	0.288682508114257
Endothelial	PLCH1	green	0.841274589548718	4.65360261601999e-13	-0.0300102	0.844850093049974
Endothelial	SMURF2	green	0.938664744151203	1.68249772895548e-21	0.11858872736992	0.437822713906468
Endothelial	CTHRC1	purple	0.622151775742996	5.05711219475578e-06	0.464790134335519	0.00129684130579866
Endothelial	SERPINE1	brown	0.563062310613387	5.65991822148675e-05	0.164457562133523	0.280346424377779
Endothelial	RFX7	blue	0.965577553243568	8.89882190673871e-27	0.252503392433178	0.0942450488843467
Endothelial	POLR2G	purple	0.970317646609293	3.85845166740974e-28	-0.173252	0.25506266706182
Endothelial	PDE3B	green	0.883476441147836	9.40483434115063e-16	0.165992247811305	0.275820121379482
Endothelial	MET	green	0.866778637819065	1.40755744558617e-14	0.310874273179287	0.0376600137178375
Endothelial	ARHGEF10	green	0.909721335791736	5.10174795637341e-18	0.198029877483207	0.192233389575791
Endothelial	PGC	purple	0.358331504667837	0.0156497126804817	-0.319297	0.0325207149353736
Endothelial	UVRAG	green	0.945400294112268	1.47642046216241e-22	0.101717047674772	0.50613665738822
Endothelial	PSMA4	purple	0.982848287200455	3.30514548092099e-33	-0.147559	0.333389569024383
Endothelial	TBC1D22A	magenta	0.941243302536977	6.85800777943233e-22	0.200333478605948	0.187007640725497
Endothelial	SLIT2	greenyellow	0.896019828309467	9.24872217726479e-17	-0.0200685	0.89589549327274
Endothelial	AKR7A2	purple	0.966800539952357	4.13843624046006e-27	-0.0542597	0.72333615913904
Endothelial	ANKS1B	green	0.95085871862849	1.61995068190659e-23	0.0607416034947273	0.691834144671356
Endothelial	SNU13	purple	0.968785349489736	1.12149139255098e-27	-0.13396	0.380320920577387
Endothelial	MOCOS	green	0.912762232504467	2.51923920138291e-18	0.12538854095943	0.411812228716408
Endothelial	CCDC3	yellow	0.835282435220733	9.68898687857219e-13	0.527635902552762	0.000195645412010069
Endothelial	NRCAM	green	0.886374965050502	5.63847575800857e-16	0.0466088400187079	0.761106164927996
Endothelial	PHLDB2	green	0.892755379854128	1.73831283436792e-16	0.00914870170597471	0.952437937856075
Endothelial	CEP85L	green	0.925686953162513	9.14345687438285e-20	0.181300132310871	0.233307398647149
Endothelial	IMP3	purple	0.96344117690573	3.17928712970851e-26	-0.146487	0.33695283832068
Endothelial	NUAK1	green	0.796409764523589	6.08317456625513e-11	0.231404599981072	0.126147812303555
Endothelial	ADARB1	green	0.93912563426139	1.43728606436472e-21	0.182388661734836	0.230465475559445
Endothelial	SAMHD1	green	0.9200532507702	4.15515528119416e-19	0.0549083428198088	0.720162392101259
Endothelial	ZFYVE9	magenta	0.972503786015276	7.61182875900223e-29	0.102161807567622	0.504269100658261
Endothelial	IL1RL1	green	0.176299473646562	0.246670547875472	-0.516887	0.000277599628092379
Endothelial	KCNT2	greenyellow	0.90052484079589	3.73773625609989e-17	-0.0247826	0.871626430354309
Endothelial	POLE4	purple	0.9714100881926	1.74174405345593e-28	-0.0642489	0.674996917530539
Endothelial	LGALS3	green	0.951078585865118	1.47430673897292e-23	0.0464163216964268	0.762064108036305
Endothelial	BAZ1A	green	0.929795260263305	2.80649017338738e-20	0.0859127372019867	0.57470100119624
Endothelial	KDELR2	purple	0.964482384251126	1.72600687160197e-26	-0.151279	0.321207940108928
Endothelial	NECAB1	greenyellow	0.440006847953059	0.00249012990735505	-0.671992	4.31845723717931e-07
Endothelial	HECTD4	magenta	0.965698798583156	8.25866410900982e-27	0.195028007467787	0.199197425523228
Endothelial	CDA	black	0.656393341711818	9.7925343594821e-07	0.0322215191791212	0.833573600153296
Endothelial	MRPS15	purple	0.975442613985701	6.89746586842361e-30	-0.239984	0.112317432179336
Endothelial	PLEKHM3	green	0.956529481429197	1.22810678522358e-24	0.0278264678602713	0.856016061471246
Endothelial	BIRC6	magenta	0.944495340672905	2.08330320145062e-22	0.170587833044755	0.262555178115556
Endothelial	SHROOM2	green	0.942770887093504	3.95280564630781e-22	0.117811987656186	0.44085074641039
Endothelial	LRP6	magenta	0.961737003428808	8.3247228310316e-26	0.148642229563996	0.329812935705801
Endothelial	SNRPD1	purple	0.976460803224572	2.80332366936699e-30	-0.136955	0.369662884248871
Endothelial	ATP9B	magenta	0.953344011923454	5.4415234166659e-24	0.0989157690508606	0.517979440815827
Endothelial	SMIM3	green	-0.883382	9.56033946088945e-16	-0.159048	0.296686106366517
Endothelial	KLHL3	green	0.881529928578732	1.3161085433214e-15	0.353089689936238	0.0173531387228065
Endothelial	HIVEP1	green	0.947105736960008	7.59172509149291e-23	0.239303855810645	0.113369878460858
Endothelial	ABI3BP	blue	0.888549884712835	3.8058772627005e-16	0.183651062787545	0.227199448467466
Endothelial	NEO1	green	0.915233153611922	1.39290875832973e-18	0.240941062396175	0.110849163864685
Endothelial	FAM189A1	brown	0.857465968349408	5.45884278678476e-14	0.152029379909878	0.318785913520804
Endothelial	ATXN7L1	blue	0.945946358733961	1.19601652149531e-22	0.226816275475657	0.134050517562332
Endothelial	ARMCX4	blue	0.955814268331105	1.73183647171216e-24	0.162593605866975	0.285908946445743
Endothelial	HIF3A	green	0.804584195360567	2.75256480855886e-11	-0.133966	0.38029698618342
Endothelial	SLC39A1	purple	0.947303569808297	7.018015238297e-23	-0.0315031	0.837233813310835
Endothelial	PDGFB	brown	0.824416063352403	3.40941890494288e-12	0.384118565355364	0.00918696156138611
Endothelial	TM4SF19	purple	0.744151009300667	4.66935502183246e-09	0.0736458018133433	0.630670936081703
Endothelial	ETV6	green	0.952550723824674	7.75709317184616e-24	0.241794206898514	0.10955265780867
Endothelial	HTATIP2	green	-0.95302	6.29497844490811e-24	-0.227227	0.133327831501121
Endothelial	PPFIBP1	green	0.954968334612622	2.58170427304803e-24	0.121608610661144	0.426160338816278
Endothelial	STAG1	magenta	0.982649093156161	4.22816742932311e-33	0.133769566561551	0.381003677509487
Endothelial	SSR2	purple	0.986509434219504	1.96296061254673e-35	-0.101548	0.506846348229285
Endothelial	CRIM1	green	0.91599714599797	1.1554878923202e-18	0.263800714016328	0.079946544158453
Endothelial	AREG	green	0.632672746466819	3.11900668088714e-06	-0.030634	0.84166591606355
Endothelial	OSMR-AS1	green	0.958885000414243	3.79552216700817e-25	0.143810287806777	0.345950505495948
Endothelial	GLA	green	-0.958117	5.60765112537172e-25	-0.189834	0.211664508469138
Endothelial	GLMP	purple	0.847005207951425	2.24224004685515e-13	-0.106537	0.48608494664212
Endothelial	ROPN1L	green	-0.886997	5.04310761950757e-16	-0.00937516	0.951262017459132
Endothelial	SF1	green	0.880272596888851	1.63008775292023e-15	0.00660759755857997	0.965639175469186
Endothelial	FBXW8	magenta	0.960099140591845	2.01672182138032e-25	0.126867107980241	0.406275926774911
Endothelial	ARHGEF11	magenta	0.957404325709937	8.00206184000609e-25	0.124223084077461	0.416206388934337
Endothelial	TRAPPC2L	purple	0.962767477006652	4.67643930645037e-26	-0.157631	0.301066169715952
Endothelial	TSPYL1	purple	0.860714594442717	3.4402614256161e-14	0.0484681926373233	0.751872669702256
Endothelial	PNRC1	purple	0.920169772449751	4.03164907455562e-19	-0.0571323	0.709316086376302
Endothelial	COL4A5	green	0.897512744735654	6.88196743368134e-17	0.282361586802191	0.0602063964069407
Endothelial	P3H2	green	0.90500882530528	1.45176283713114e-17	-0.097792	0.522768663142866
Endothelial	COX7A2	purple	0.951328324546512	1.32399484589378e-23	-0.101004	0.509137607733817
Endothelial	DAPK2	greenyellow	0.899092474809721	5.00858041293272e-17	-0.123775	0.41790110155912
Endothelial	UBE2L6	purple	0.921183574208557	3.09470407026206e-19	-0.0301091	0.844344953838957
Endothelial	CXCL17	purple	0.78877409019027	1.23609646630731e-10	0.0297196734683976	0.846333930093608
Endothelial	CAMK2D	blue	0.955035400934133	2.50196478357926e-24	0.126447	0.407843739444537
Endothelial	BAX	purple	0.940738915787811	8.19984160875518e-22	-0.0807093	0.598165827357649
Endothelial	RRS1	purple	0.918636572544172	5.97504503907186e-19	-0.14425	0.34446355333299
Endothelial	HSPA6	purple	0.754780416511633	2.10895208812795e-09	-0.0741692	0.628237515032111
Endothelial	BRI3	green	0.94406667339669	2.44746927143695e-22	0.0350792316445611	0.819049968212335
Endothelial	GBE1	blue	0.912459710533821	2.70553277082167e-18	0.0402760723460573	0.792794351651327
Endothelial	AC058791.1	purple	0.779382982946791	2.84396682598249e-10	-0.17243	0.257358474774461
Endothelial	BCAS2	purple	0.917671807575049	7.6233084785509e-19	-0.22173	0.143235870838876
Endothelial	CALM1	purple	0.971620804095658	1.48873992782954e-28	-0.131786	0.388168126904003
Endothelial	ECSCR	green	0.961393626289522	1.00531840043532e-25	0.228383568232289	0.131310617942254
Endothelial	MRPL50	green	-0.936276	3.73504514692217e-21	-0.0296609	0.846633958334519
Endothelial	DUOXA1	greenyellow	0.87679535076693	2.90985318246469e-15	-0.0884658	0.563343931074134
Endothelial	UCP2	purple	0.928126601897445	4.5726115955894e-20	-0.0642795	0.674850461660872
Endothelial	POGZ	brown	0.89220996923918	1.9277652328604e-16	0.133990250124761	0.380211366711807
Endothelial	STXBP5	blue	0.953501989632239	5.06684006756276e-24	0.138356635829565	0.364736491541771
Endothelial	HDAC8	magenta	0.946193314413668	1.0865680381101e-22	0.143187981078176	0.348063550485684
Endothelial	CDKL5	green	0.883311736059982	9.67832057620208e-16	-0.0227714	0.881967400438579
Endothelial	GFER	purple	0.964516880441117	1.69090213593866e-26	-0.134763	0.377444858929509
Endothelial	GTF3A	purple	0.975704439154725	5.49197982873158e-30	-0.0894519	0.558985318572577
Endothelial	COBL	green	0.844351640156135	3.15572326221681e-13	-0.0397827	0.795277542665022
Endothelial	NCOA2	blue	0.96591172535242	7.23914481801404e-27	0.175133737082459	0.249858588756007
Endothelial	BTRC	blue	0.929660628971259	2.92052416689832e-20	0.254607616307893	0.091441941764486
Endothelial	NSMCE3	purple	0.887011004958845	5.03037779525325e-16	-0.00892811	0.95358349814704
Endothelial	WDR7	blue	0.954911902785236	2.65066729215455e-24	0.0543004019621417	0.723136970060739
Endothelial	ESYT3	green	0.736992135597543	7.80576306943838e-09	-0.256473	0.0890118346108288
Endothelial	TMEM141	purple	0.964528285599193	1.67944604515451e-26	-0.0976649	0.523311734226853
Endothelial	GLI3	green	0.929611675945001	2.96306881709798e-20	0.247741931659171	0.100832950197042
Endothelial	FNBP1L	green	0.91946548040761	4.83491497930204e-19	0.239936385296083	0.112390895717039
Endothelial	ACADL	greenyellow	0.778552665548744	3.05543952365448e-10	-0.423693	0.00372900528196116
Endothelial	SNRPC	purple	0.965629952238868	8.61657259072865e-27	-0.118625	0.437682679927794
Endothelial	CH25H	purple	0.669463510346115	4.94746652622922e-07	0.134707683358074	0.377642353571437
Endothelial	AQP9	purple	0.70555925450825	6.21548837947952e-08	-0.371547	0.0119724596642211
Endothelial	SIPA1L3	green	0.947063449380623	7.72001408846329e-23	0.108151679495277	0.47946324093501
Endothelial	PCSK5	green	0.905337527006198	1.35204436465293e-17	0.171445311986766	0.260127979294134
Endothelial	PGLS	green	-0.955535	1.97770193782116e-24	-0.0812112	0.595884359647564
Endothelial	LMO7	greenyellow	0.852763609274545	1.04413679341157e-13	-0.0956105	0.532128390381835
Endothelial	CEBPD	green	0.796607743420592	5.96999639694557e-11	0.14488710776103	0.342312829624018
Endothelial	SUPT3H	blue	0.894406841024068	1.26650819777482e-16	0.0283030002112667	0.853576977685136
Endothelial	THRB	blue	0.965819046506159	7.667231192886e-27	0.137927279621247	0.366241111429293
Endothelial	PBDC1	purple	0.965066638605298	1.21533183733766e-26	-0.160886	0.291067850260741
Endothelial	COL8A1	greenyellow	0.88995090675291	2.94177975241113e-16	-0.0517606	0.735607182962446
Endothelial	SFMBT2	green	0.876041250908335	3.29191175253037e-15	0.161308241363622	0.28978642387707
Endothelial	PRKCH	green	0.935500540641677	4.80598113475073e-21	0.172638056734688	0.256776753900779
Endothelial	SARAF	purple	0.953022496549177	6.28705882395788e-24	-0.118593	0.437805634229367
Endothelial	ZNF438	blue	0.912502165791219	2.67862189518558e-18	0.0879722252992207	0.565531347109835
Endothelial	NOD1	green	0.943519646285201	3.00057258089107e-22	0.184853746265239	0.224117659512672
Endothelial	BTG1	green	0.933153929448987	1.01196735743667e-20	0.0302384086090009	0.843684881735806
Endothelial	ARHGEF28	green	0.910634128832793	4.13884797315152e-18	0.107124401380788	0.483671329123395
Endothelial	CPNE8	green	0.918796461927532	5.73694271331295e-19	0.193715430347346	0.202297673892069
Endothelial	PMVK	purple	0.944888982640676	1.79479017210208e-22	-0.151187	0.321506255020536
Endothelial	MAP4K3	blue	0.959849643334206	2.30021673697858e-25	0.137034385382013	0.369382073451005
Endothelial	GAREM1	blue	0.892771212479849	1.7330862524993e-16	-0.0942297	0.53809468770857
Endothelial	MSRB3	green	0.891518807978281	2.19604880675074e-16	0.17384558133923	0.253413578649739
Endothelial	MYO10	green	0.93532915581744	5.07935548827737e-21	0.143515641895825	0.34694999224059
Endothelial	LINC01290	greenyellow	0.791507364697427	9.62261993658979e-11	-0.267926	0.0751710192492123
Endothelial	S100A10	green	0.929876479775157	2.73975619374058e-20	0.0349198245662639	0.81985858829183
Endothelial	ST5	green	0.906426117962611	1.06618154099935e-17	0.250829390624787	0.0965221266106802
Endothelial	GHR	green	0.967208542568444	3.18520204387309e-27	0.0848167416962693	0.579608299690225
Endothelial	SCLT1	blue	0.916725286113209	9.65376766897364e-19	0.174941485482602	0.250387010661891
Endothelial	PDLIM4	purple	0.605696029512711	1.04041219468444e-05	0.471147134942831	0.00108830083159864
Endothelial	DST	green	0.917723307859569	7.52537866251517e-19	0.131702690226631	0.388471658854142
Endothelial	SYNE2	green	0.954327049447422	3.47659040655063e-24	0.226292494289351	0.134975619943074
Endothelial	SKP1	green	-0.958013	5.90694313270077e-25	-0.175834	0.247939050716226
Endothelial	UST	blue	0.918139850699575	6.77605845129308e-19	0.0891508408163219	0.56031438239603
Endothelial	ODC1	purple	0.895336343667611	1.05731447452518e-16	-0.225938	0.135605089656131
Endothelial	CDC14A	green	0.929584188987596	2.98721498015614e-20	0.194354777771248	0.200783353840265
Endothelial	PSMB5	purple	0.970861768161051	2.60617634571834e-28	-0.0754226	0.622426
Endothelial	SCARA5	green	-0.531544	0.000171773259187369	0.101353844472071	0.507664354891892
Endothelial	CLIC3	purple	0.644249866631417	1.79408768026678e-06	-0.363974	0.0139766412030929
Endothelial	NDUFS7	purple	0.978074103304748	6.1897216835493e-31	-0.143479	0.347074852300418
Endothelial	CHL1	yellow	0.911845785799718	3.12454350346358e-18	0.409087907949196	0.00526638799242502
Endothelial	MLLT3	blue	0.94660462645496	9.25122910807237e-23	0.154741187802343	0.31012741424576
Endothelial	USP25	green	0.921524739855628	2.82891018035285e-19	0.0531241348868312	0.728903733323968
Endothelial	FOXO1	green	0.939775446959093	1.1486233413589e-21	0.286121007451789	0.0567288721138732
Endothelial	MON2	magenta	0.962562709152273	5.25098733460272e-26	0.13029272162902	0.393615088135764
Endothelial	FOCAD	blue	0.948239660350119	4.81876930330011e-23	0.231419997174907	0.126121895708921
Endothelial	ZCRB1	green	-0.969353	7.60192929048314e-28	-0.11017	0.471251831116997
Endothelial	USP6NL	blue	0.914620824832719	1.61592018417183e-18	0.03684650281766	0.810097793661175
Endothelial	NFIB	blue	0.918402033489079	6.34135441331293e-19	0.391195327888587	0.00787953103994345
Endothelial	ZBTB46	green	0.917884884621668	7.22582855481484e-19	0.305968099182125	0.0409487818245814
Endothelial	FLRT2	green	0.724597791487349	1.82946599787784e-08	0.501368076149079	0.000450893336694491
Endothelial	PSMA2	purple	0.959033709303588	3.51627473094752e-25	-0.140201	0.358315328441815
Endothelial	GRIP1	yellow	0.843309500299813	3.60275855526215e-13	0.17773582096414	0.242780399918018
Endothelial	TMEM176B	green	-0.761339	1.2655383837534e-09	0.156156334111068	0.305669075336104
Endothelial	HPGD	purple	0.329371117951747	0.0271490717729351	-0.197119	0.194328154919042
Endothelial	TLN2	green	0.94061460482032	8.56698785105457e-22	0.145412163558417	0.340547694524084
Endothelial	FGFR2	greenyellow	0.881078939429425	1.42148046785181e-15	0.210200257106815	0.165769236844553
Endothelial	PTBP2	blue	0.946189400119185	1.08822599568073e-22	0.184211982332943	0.225758526264453
Endothelial	MPDZ	green	0.921040337039566	3.21322262194661e-19	0.262039716885806	0.0820559803656762
Endothelial	SRGN	green	0.919687745167547	4.56630585935198e-19	0.0751774620519927	0.62356081976989
Endothelial	TAGLN2	purple	0.949085454810678	3.41022273353829e-23	0.0150675935644806	0.921743565151239
Endothelial	ZFAND5	green	0.860746005493643	3.42474456852017e-14	-0.0624288	0.683715694485783
Endothelial	MID1IP1	purple	0.879610277872404	1.82280747807512e-15	-0.386024	0.008817695214365
Endothelial	HSPG2	yellow	0.824541807542637	3.36180470632395e-12	0.360802559123192	0.0148972585198267
Endothelial	PSMD8	purple	0.984348683050082	4.68655897876877e-34	-0.135541	0.374670326599557
Endothelial	CPEB3	green	0.931538082049902	1.66378292370157e-20	0.170599347070322	0.262522486673012
Endothelial	ARC	purple	0.740486624494079	6.08678528311655e-09	0.00552761766228441	0.971252712305873
Endothelial	FBXW11	green	0.967995324107672	1.90444110847671e-27	0.175909920426581	0.247732819569993
Endothelial	TUBA1C	purple	0.975466031381254	6.75899582917052e-30	-0.11311	0.45942517964817
Endothelial	LAMA4	green	0.830921638605739	1.62249814473286e-12	0.219821685301677	0.14679995855151
Endothelial	CDH13	blue	0.929743237675501	2.85004290551523e-20	0.0644600351228752	0.673988086286984
Endothelial	COX17	green	-0.959622	2.59221592654537e-25	-0.131961	0.387533186900305
Endothelial	FAM189A2	green	0.936026163333197	4.05211392378815e-21	0.0488782674158719	0.749840801966079
Endothelial	GCSH	green	-0.936021	4.05893262441316e-21	-0.0922887	0.546535809167867
Endothelial	MYO5B	green	0.835415482520307	9.53553801768039e-13	-0.024971	0.870658424251382
Endothelial	SYN3	green	0.92868127085928	3.89282772783771e-20	-0.0596012	0.697341015284814
Endothelial	EEF1D	purple	0.980690668624382	4.13351697814727e-32	-0.1388	0.363188100316341
Endothelial	PPM1L	blue	0.923883588553695	1.50331627563093e-19	0.0235347997186383	0.878039692082283
Endothelial	GALNT15	yellow	0.745536768767752	4.21903422252066e-09	0.193554777903747	0.202679444427124
Endothelial	FAT1	green	0.86523818738878	1.77351582950497e-14	0.278157514999093	0.0642949379544639
Endothelial	MEF2C-AS1	green	0.923213711830429	1.80265639787214e-19	0.304338525778048	0.0420917014585657
Endothelial	LINC00486	brown	0.856564472918418	6.19253487841388e-14	0.124642642702775	0.414621447228001
Endothelial	KLF4	green	0.86702040552714	1.35706461170748e-14	-0.0454191	0.767031767627563
Endothelial	EIF3F	purple	0.955612346843912	1.90635169631594e-24	-0.189575	0.212299660709195
Endothelial	MSLN	purple	0.470467173426594	0.0011090794728491	-0.258589	0.086315819888889
Endothelial	LRRC75A	green	-0.835978	8.91180418578349e-13	0.0210196049309884	0.890990507931622
Endothelial	CISD2	purple	0.955925402500933	1.64238478227094e-24	-0.10228	0.503771630234063
Endothelial	JAGN1	green	-0.954797	2.79679121836704e-24	-0.0691905	0.651539346873777
Endothelial	FPR3	purple	0.811276622715568	1.39815624456428e-11	-0.063442	0.678856947176031
Endothelial	JAM3	green	0.902959785929644	2.24932157528477e-17	0.235734492336565	0.119016144889892
Endothelial	PODXL	green	0.8606959164038	3.44951977156382e-14	0.221318295651407	0.143999519315637
Endothelial	SENP7	green	0.952550729624755	7.75707323587556e-24	0.186349923389808	0.220324212320444
Endothelial	FGF13	yellow	0.925939390381677	8.52019632675082e-20	0.39147067788556	0.00783208966471344
Endothelial	WRN	blue	0.946506703109648	9.61348301885919e-23	0.0968616546780338	0.526750462020724
Endothelial	SAMD12-AS1	green	0.951797457729092	1.08016621370558e-23	0.1228015672458	0.421601940765954
Endothelial	SHROOM3	greenyellow	0.927044622473319	6.23620393395582e-20	-0.0305013	0.842343008894733
Endothelial	GCNT2	green	0.827930596593563	2.29151869384847e-12	-0.0583691	0.703308369784303
Endothelial	CLU	purple	0.822711472770851	4.12102973322717e-12	0.26960195612599	0.0732968151880909
Endothelial	USP13	green	0.885535584320413	6.54815250289589e-16	0.0648102955912982	0.672315962488565
Endothelial	SEMA5A	greenyellow	0.885122108872012	7.04580725379105e-16	-0.0127957	0.933514397934795
Endothelial	ARHGAP42	blue	0.896417206742207	8.55270941894477e-17	0.0826207857093593	0.589497267936042
Endothelial	DUOX1	green	0.658429813063206	8.82348518917121e-07	-0.191764	0.206970316358038
Endothelial	WDFY3	blue	0.972327023962015	8.72089976871286e-29	0.132165590628078	0.386791692153124
Endothelial	FIS1	purple	0.974334739311914	1.7617255515875e-29	-0.0274509	0.857939413631995
Endothelial	CBLB	blue	0.906081762758825	1.14973921979872e-17	0.268646031772466	0.0743614573006004
Endothelial	COL12A1	green	0.706549147334841	5.84640527548291e-08	-0.221098	0.144408334072892
Endothelial	RNGTT	blue	0.939324278573091	1.34243458958373e-21	0.0666777375813076	0.663427436922363
Endothelial	MRPS36	green	-0.95905	3.48712902951539e-25	-0.135284	0.375587788925052
Endothelial	DGKD	green	0.881453894164318	1.3333389095528e-15	-0.16791	0.270232875835672
Endothelial	PLA2G4F	greenyellow	0.619706833055943	5.64394649691632e-06	-0.466523	0.00123671819456907
Endothelial	RAB11FIP1	green	0.775154888010589	4.0847572535975e-10	-0.245505	0.104047045635688
Endothelial	DCTN6	purple	0.953616361578482	4.8110381230037e-24	-0.242311	0.108773211855615
Endothelial	CACNA2D1	blue	0.904330774839575	1.67993830640999e-17	0.0427906863645358	0.780168947016679
Endothelial	NEGR1	magenta	0.813849200850782	1.06995137468542e-11	-0.0577363	0.70637982418746
Endothelial	LCK	purple	0.834108679090231	1.11475355436782e-12	-0.205659	0.175314768649622
Endothelial	TYMP	brown	0.920421414988706	3.77671195271507e-19	0.0955599733811453	0.532346214182187
Endothelial	PCDH9	blue	0.842438741571917	4.02152400535363e-13	0.068241873530906	0.656017510244487
Endothelial	RELN	green	0.889336133230437	3.29513022120391e-16	0.270471171870118	0.0723392162160267
Endothelial	ANAPC13	green	-0.945665	1.33335157105828e-22	-0.0840349	0.583120343555376
Endothelial	LMTK2	green	0.922664021458398	2.0897497131935e-19	-0.0305365	0.842163320946729
Endothelial	RARRES2	purple	0.866401110000022	1.48997521890054e-14	-0.117082	0.443705742254896
Endothelial	ZNF532	green	0.928182457669373	4.4993600441595e-20	0.293864561635503	0.0500739786057561
Endothelial	ARHGEF3	green	0.898100405773954	6.11843990892515e-17	0.25372772660204	0.0926061035753582
Endothelial	MRPL10	purple	0.823419299561275	3.81001693799607e-12	-0.0331169	0.829016863072974
Endothelial	COPZ1	purple	0.970157891130848	4.32358953711605e-28	-0.172327	0.257648665753754
Endothelial	NLK	green	0.946994973291478	7.93213451087786e-23	0.296345922113173	0.0480803028117375
Endothelial	CCDC124	purple	0.932585966839017	1.20690778401659e-20	-0.172278	0.257786109172867
Endothelial	RPS6KC1	blue	0.946377001946522	1.01141010980276e-22	0.108195971699874	0.479282239112355
Endothelial	VCAM1	purple	0.250064630861315	0.0975764207793572	0.602527384822739	1.18997486071737e-05
Endothelial	PRKCA	green	0.91101137504194	3.79361037276591e-18	-0.0312784	0.838378915386877
Endothelial	NEU1	purple	0.952900802049653	6.63858316726873e-24	-0.161813	0.288259731243128
Endothelial	MOSPD3	purple	0.899879934586824	4.26651723435889e-17	-0.0221556	0.885137475670616
Endothelial	TBC1D32	green	0.957096030481846	9.31540655325132e-25	0.136582041865151	0.370979442150216
Endothelial	PRDX6	green	-0.93915	1.42517439263878e-21	-0.249367	0.0985452039772128
Endothelial	EIF3I	purple	0.956935398233714	1.00785588720868e-24	-0.130856	0.391555629082623
Endothelial	SMAD3	green	0.903195777398121	2.13976917736101e-17	0.309298139068391	0.0386920394640765
Endothelial	FBXW7	blue	0.942090041932342	5.06244072496715e-22	0.160085888287878	0.293505350702658
Endothelial	MGAT5	blue	0.945966997396557	1.18648255163555e-22	0.210090355018393	0.165995723356592
Endothelial	NDUFA11	purple	0.977255999756614	1.34961258473991e-30	-0.219509	0.147390483868353
Endothelial	CDRT4	green	0.983102083578687	2.40480784174744e-33	0.183452160276117	0.227711916217538
Endothelial	RANBP1	purple	0.975621307549103	5.90562868623281e-30	-0.156232	0.305431721986163
Endothelial	HERC3	green	0.841355063751392	4.60705172638991e-13	0.0188043878529908	0.902420123155131
Endothelial	NDUFB1	purple	0.975868399745023	4.75561698100194e-30	-0.140061	0.358798973054895
Endothelial	TUSC2	purple	0.950242981718181	2.10421978332162e-23	-0.130053	0.39449509020202
Endothelial	PDE1A	yellow	0.891358265595245	2.26324514475873e-16	0.429016179352304	0.00327570056219855
Endothelial	SOX6	blue	0.934248030742113	7.17584796792939e-21	0.0802521765340515	0.6002470372723
Endothelial	SPAG6	purple	0.608406239313468	9.26429800260603e-06	0.134007001578121	0.380151264592718
Endothelial	HMBOX1	blue	0.942570000562657	4.25350109380032e-22	0.155892875418163	0.306495965409569
Endothelial	CAMK1D	green	0.911200070377651	3.63135847797053e-18	0.312497690292759	0.036620752619829
Endothelial	NQO1	green	-0.872639	5.68758298233234e-15	-0.261025	0.0832908867783098
Endothelial	PPP1R11	green	-0.92719	5.98241324704743e-20	-0.031289	0.838325037776333
Endothelial	CHMP1B	green	-0.940918	7.69625620470047e-22	-0.111351	0.4664837757061
Endothelial	WDR70	magenta	0.969099859054094	9.04889926128608e-28	0.163867268302873	0.28210028448719
Endothelial	ITGA6	green	0.897268239376717	7.22555157920285e-17	0.334283206499229	0.0248108014055218
Endothelial	RABGAP1	blue	0.948818590124504	3.8056905924798e-23	0.157636473682691	0.301050073285068
Endothelial	BST2	purple	0.876844219397762	2.88660264040184e-15	0.102089814134347	0.504571164660919
Endothelial	ANKRD36B	green	0.915930580233004	1.17453807611635e-18	0.158005410531848	0.29990576966903
Endothelial	TNFAIP3	green	0.853412048705022	9.56094819671821e-14	0.0249049916416965	0.870997538270513
Endothelial	DIAPH2	green	0.96203633276249	7.05233674462778e-26	0.0171229113534266	0.91110902457844
Endothelial	CNKSR3	yellow	0.813997654202604	1.05342751518445e-11	0.462863420640227	0.00136671187820977
Endothelial	PLCL2	green	0.921394020272893	2.92808055923811e-19	0.141837566972547	0.352676036710698
Endothelial	SMAD9	green	0.903196349474372	2.13950986529479e-17	0.290100542074675	0.0532253107540502
Endothelial	HEXIM1	purple	0.920462635770087	3.7364394708261e-19	0.038503400649178	0.801726407294022
Endothelial	ZFAND3	blue	0.965712326716564	8.19002011278329e-27	0.126178089392877	0.40885051501186
Endothelial	ECE1	green	0.856747968983842	6.03602259883632e-14	0.358974056490219	0.0154510143618013
Endothelial	NDUFB6	purple	0.965244905641333	1.09067291756149e-26	-0.13418	0.379532240679198
Endothelial	ACAD11	magenta	0.948697732015377	3.99880193931861e-23	0.0661283116534892	0.666037884640083
Endothelial	CHRM2	brown	0.357436659334229	0.0159300374566946	-0.26645	0.0768530307420257
Endothelial	DNAH14	green	0.909895137586634	4.90339477231232e-18	0.0597007705166271	0.696859693940397
Endothelial	VTI1A	blue	0.946649009186576	9.09135167279324e-23	0.069925729573151	0.648076775465273
Endothelial	GNAQ	blue	0.919850176279081	4.37903542298013e-19	0.214401535791684	0.15727853662019
Endothelial	TMEM50A	green	-0.974154	2.04553475470362e-29	-0.104809	0.493226937780859
Endothelial	RPS2	purple	0.918502407806157	6.18205057195353e-19	-0.272024	0.0706528049854665
Endothelial	KLK11	black	0.811616784056061	1.34987518354924e-11	0.11350011571719	0.457869010407384
Endothelial	ZNF593	purple	0.931983408106414	1.45250250728523e-20	-0.169148	0.266663658962223
Endothelial	VCAN	blue	0.887342812039341	4.73836114189695e-16	0.0148068542839915	0.923093675569194
Endothelial	PFN2	purple	0.831523764216687	1.5123332685525e-12	0.0554452059603802	0.717538980001993
Endothelial	NTN1	yellow	0.943164738912762	3.42092795392415e-22	0.444158473970956	0.00223981730353905
Endothelial	PLD1	blue	0.890740656841901	2.54037261201024e-16	0.150869219426577	0.322536344379278
Endothelial	VWA8	blue	0.95551701547471	1.99444178721323e-24	0.11538502641164	0.450386200105132
Endothelial	NDUFA3	purple	0.961305823741571	1.05471520093903e-25	-0.0787229	0.607232443906506
Endothelial	ZNF704	green	0.908350841417472	6.95533783077071e-18	0.114131146995512	0.45535644797698
Endothelial	CLEC1A	green	0.870936643006174	7.4337176113313e-15	0.274395695182834	0.0681380223102136
Endothelial	EPHA4	green	0.914338390687672	1.72984207413114e-18	0.254660623322646	0.0913721734464256
Endothelial	SUB1	purple	0.966177424826448	6.13438222705838e-27	-0.11089	0.468339703372421
Endothelial	AMBRA1	magenta	0.94926684752582	3.1640790746422e-23	0.0328667434294428	0.83028943076735
Endothelial	ARL6IP5	green	-0.960072	2.0453786183324e-25	-0.198519	0.191114257028319
Endothelial	AC147651.4	purple	0.866230533803119	1.52869327792331e-14	-0.128708	0.399443383189017
Endothelial	ZBTB7C	green	0.902135642080573	2.67514641346724e-17	0.281454675687256	0.0610703144125818
Endothelial	REV3L	magenta	0.934666024669121	6.28287143317995e-21	0.139733412157687	0.359936948341798
Endothelial	ZXDC	green	0.95273798975409	7.13820670802307e-24	0.087304196538635	0.56849823508577
Endothelial	FGD6	green	0.908072195745143	7.40332258138163e-18	0.333429867309713	0.0252044873341538
Endothelial	CD99	green	0.82677647248412	2.61344722489946e-12	0.0386746838379979	0.800862242142983
Endothelial	ARPC5	purple	0.95643275852077	1.28697177710894e-24	-0.236003	0.118583503727504
Endothelial	NOSTRIN	green	0.921071888685558	3.18675145698643e-19	0.151647545793228	0.32001720920529
Endothelial	CACNB4	blue	0.925009351687647	1.10377342715219e-19	-0.034839	0.820268833216203
Endothelial	NRG1	green	0.869697592222798	9.01192013333062e-15	-0.0616692	0.687366310112782
Endothelial	GULP1	blue	0.90812607134268	7.31462434890069e-18	0.220178550076851	0.146128578043396
Endothelial	ZNF718	green	0.96281061357327	4.5632864704865e-26	0.155947090170041	0.306325690551058
Endothelial	MKLN1	green	0.942155841367925	4.94347128014412e-22	0.135917902686907	0.373332208179323
Endothelial	IGFBP5	purple	0.768926963815076	6.86631921031086e-10	0.0848893590614569	0.579282571064436
Endothelial	MTHFD2	purple	0.927395426298588	5.6423159786765e-20	-0.150865	0.322549911785137
Endothelial	TMEM179B	purple	0.941804089436132	5.61181727567128e-22	-0.137291	0.368476366059706
Endothelial	PCED1B	green	0.89414676569033	1.33172641016102e-16	0.0623078283839494	0.684296466572765
Endothelial	PDXK	green	0.919565930309871	4.71171319152388e-19	0.0446417426655945	0.770910548268605
Endothelial	SLC1A1	green	0.940212046518612	9.86619092580066e-22	-0.0178843	0.907173498064648
Endothelial	LMO3	greenyellow	0.946441669380081	9.86147793951056e-23	-0.0205568	0.893376694367198
Endothelial	ARFGEF3	blue	0.867409439079084	1.27939821643824e-14	0.129699004954542	0.395792753869881
Endothelial	CFAP53	purple	0.810620914710621	1.49585414501753e-11	0.143710544765912	0.346288651767981
Endothelial	SORCS2	green	0.879345361069814	1.90577826941884e-15	0.287767209942276	0.0552577623470087
Endothelial	ITIH2	red	0.984050942878162	7.00708003689364e-34	0.0446500051372232	0.770869291443321
Endothelial	HMGB3	purple	0.779293078572515	2.86618167012377e-10	0.202979379295018	0.181131196337936
Endothelial	FIBP	purple	0.979472872099019	1.52108085449728e-31	-0.0928741	0.543983343538816
Endothelial	MPP7	green	0.903530591280507	1.99299541128956e-17	0.0463950825894682	0.762169812306753
Endothelial	RIN2	brown	0.879331649751176	1.91016852657567e-15	0.156431326926877	0.304807507896576
Endothelial	EYA1	yellow	0.6691759984979	5.02415644501057e-07	0.380538281492211	0.00991674123339773
Endothelial	PREX1	brown	0.867005149744075	1.36019939011371e-14	0.114733522627203	0.452964985099843
Endothelial	TAGLN	purple	0.893291307288135	1.56944833360057e-16	-0.220091	0.146293162653652
Endothelial	CHPF	purple	0.874380767098273	4.30730028106768e-15	-0.0456786	0.765738256617676
Endothelial	ANKHD1	green	0.951555590832871	1.19997837409752e-23	-0.0308512	0.840557579858488
Endothelial	MMP16	yellow	0.848124118731524	1.9375779608288e-13	0.593483874793206	1.73235622007051e-05
Endothelial	PHGDH	green	-0.734051	9.59476140930119e-09	-0.291543	0.0519995666492633
Endothelial	VWF	green	0.907632001510942	8.16726515826759e-18	0.275402399449355	0.0670921568506601
Endothelial	BCAR3	green	0.921882884334651	2.57328633848033e-19	0.0832105248188944	0.586834155612181
Endothelial	MIR646HG	green	0.82941276497493	1.93278945509079e-12	-0.0568882	0.710503835757628
Endothelial	ADI1	green	-0.956334	1.34959028457808e-24	-0.211192	0.163735845354633
Endothelial	TGFBR3	green	0.926343911886621	7.60483784867039e-20	0.297867464237335	0.0468899561004505
Endothelial	SGK1	green	0.847122892293711	2.20818367501905e-13	0.0654651673068331	0.669193837819228
Endothelial	SURF1	purple	0.953221553611689	5.74994718782025e-24	-0.159013	0.296795609366784
Endothelial	EMCN	green	0.889992846706771	2.91903197921071e-16	0.311321870876806	0.0373710882774149
Endothelial	TVP23C	green	0.92595150188478	8.49133205061421e-20	0.159934154271459	0.293969136393314
Endothelial	RAB34	purple	0.956955538866785	9.97970929919708e-25	-0.133945	0.380372590181167
Endothelial	RAB3C	yellow	0.754506514986681	2.15366922955474e-09	0.57176571052297	4.08215974111557e-05
Endothelial	SCTR	greenyellow	0.742895433195032	5.1159046126132e-09	-0.0655213	0.668926492811838
Endothelial	RAPGEF1	green	0.92041948631717	3.77860631340959e-19	0.107610839338965	0.481676304418005
Endothelial	PTPN21	green	0.921949425609658	2.52827666550514e-19	0.00161561081838823	0.991596144908068
Endothelial	LAMA5	brown	0.934837950359151	5.94714532891932e-21	0.116684667632817	0.445266000583968
Endothelial	RAI1	green	0.927357286268292	5.70418111019505e-20	0.30597227844633	0.0409458835945732
Endothelial	DDIT4	purple	0.852210103522852	1.12530148063125e-13	-0.0716585	0.639945541296914
Endothelial	DLC1	green	0.921638370066311	2.74530431429819e-19	0.0405566911119442	0.791382752638241
Endothelial	CELSR1	green	0.853252955923431	9.77021256028663e-14	0.216577738750561	0.153007570410142
Endothelial	ASB3	magenta	0.957799385195495	6.57523403938903e-25	0.101625828898862	0.506520120327431
Endothelial	ACACB	green	0.907948799791101	7.61033780484835e-18	0.20205783440796	0.183162710910022
Endothelial	LIMS2	green	0.874990187354586	3.90432767920037e-15	0.0195658942291572	0.89848874221419
Endothelial	MBOAT2	green	0.861047432761909	3.2791706420252e-14	0.231253949448797	0.126401598758089
Endothelial	LCLAT1	green	0.951232823069012	1.37966656677258e-23	0.221078692873739	0.144445184611572
Endothelial	SPIRE1	green	0.866719231179844	1.42023385081474e-14	-0.0503069	0.74277520153191
Endothelial	TFRC	green	0.894644875608668	1.20948175696178e-16	0.0534894964861547	0.727110910677202
Endothelial	TMEM117	blue	0.919994043395621	4.21928015516332e-19	0.173500055320035	0.254372894409651
Endothelial	MCPH1	magenta	0.952470268218103	8.03837475186004e-24	0.10221024230397	0.50406593404318
Endothelial	PSMC3	purple	0.968281981680866	1.57396889442986e-27	-0.194113	0.201354433730426
Endothelial	BEST1	purple	0.901696153947124	2.93243475298647e-17	-0.346893	0.0195668181967872
Endothelial	GADD45G	purple	0.819226954985222	6.03401272840252e-12	-0.234183	0.121536332542525
Endothelial	BATF	purple	0.862281293085017	2.74210042699759e-14	0.0338095555208758	0.825495702239766
Endothelial	RBM8A	purple	0.979936904295903	9.34640220960273e-32	-0.123869	0.417545180755126
Endothelial	ENTPD1-AS1	green	0.912604129354675	2.6150249577803e-18	0.209545013313129	0.167122886422205
Endothelial	NOS1AP	green	0.926409362241027	7.46581623796091e-20	0.129222715184992	0.39754477863801
Endothelial	TCF21	purple	0.746628777329634	3.8932052657657e-09	-0.248969	0.0991019003501154
Endothelial	RPH3AL	green	0.903452497292679	2.02635002508059e-17	0.0779964221981963	0.610563348399231
Endothelial	YIF1A	purple	0.939846457925251	1.120655406893e-21	-0.191031	0.208743131129211
Endothelial	FAM13A	greenyellow	0.868301081658945	1.11696275890738e-14	0.156527697555351	0.304505941737817
Endothelial	SLC10A7	blue	0.944235034858827	2.29775705959792e-22	0.207541058701671	0.171312491137157
Endothelial	ATP2B1	green	0.913679641326834	2.02590998880262e-18	0.104881114326868	0.492927391443833
Endothelial	POLR3GL	purple	0.934291044156419	7.0786691079634e-21	-0.142979	0.348774176071627
Endothelial	DENND5B	green	0.931440246074088	1.71396151027777e-20	0.275239368248309	0.0672606597125536
Endothelial	AGR3	purple	0.679078963726857	2.92885889680445e-07	0.108621959895973	0.477543260039402
Endothelial	DCXR	purple	0.884616960645849	7.70249231118984e-16	-0.305115	0.0415439162841815
Endothelial	PAFAH1B3	purple	0.932004604337418	1.44311079780552e-20	-0.0872495	0.568741322600808
Endothelial	LINC00639	yellow	0.871174340406196	7.16255472811139e-15	0.431116101743237	0.00311066168722744
Endothelial	CDC42	green	0.933291936210647	9.69337014166632e-21	0.092064064415585	0.547516856050566
Endothelial	LTK	brown	0.41888516964464	0.00418471748038326	-0.00982617	0.94892042961475
Endothelial	OPN3	green	-0.871088	7.2602469722473e-15	-0.229562	0.129278099579533
Endothelial	CCBE1	greenyellow	0.851192422538015	1.29033354063693e-13	-0.191098	0.208581957836081
Endothelial	SLC35F6	green	-0.872436	5.87343545826925e-15	-0.122802	0.421599630950364
Endothelial	CIITA	green	0.86026880026845	3.66777970047483e-14	0.126815369105854	0.406468929511852
Endothelial	DPH6	blue	0.938607410117676	1.71564599117701e-21	0.0255167779078189	0.867856389308015
Endothelial	HSP90AB1	purple	0.938730994361311	1.64495277156999e-21	-0.152477	0.317346769947479
Endothelial	RRAD	purple	0.784358089893322	1.83841956981916e-10	0.0923741687595672	0.546162855372671
Endothelial	LRP2	greenyellow	0.792103727373655	9.10645757981922e-11	-0.220227	0.146037067375282
Endothelial	SUMO1	purple	0.963499592966096	3.07362403182927e-26	-0.0762634	0.61854038376588
Endothelial	THADA	blue	0.941046772608186	7.35390974058882e-22	0.192150316453902	0.206038543553679
Endothelial	CDK2AP2	purple	0.93473575922022	6.14458251070873e-21	-0.141174	0.354954759366678
Endothelial	PSMB8	purple	0.954877539884315	2.69351559469808e-24	-0.0482499	0.752954969883468
Endothelial	EMC4	purple	0.95887472373155	3.81557987923653e-25	-0.0791767	0.605155962054237
Endothelial	MEF2C	green	0.9386639257226	1.68296659867708e-21	0.314638905071273	0.0352861656716427
Endothelial	ZMYM4	magenta	0.935066381441541	5.52738561372722e-21	0.240168658531782	0.112033018734247
Endothelial	CAPN8	green	0.82136819352699	4.77823492780087e-12	0.0955777388685161	0.532269647821709
Endothelial	ATG101	purple	0.951526797743086	1.21505569052874e-23	-0.139156	0.361945095991587
Endothelial	HCG17	green	0.967393577039243	2.82552056731425e-27	0.151683841226621	0.319900038925063
Endothelial	PSMD10	green	-0.881619	1.29618620448931e-15	-0.00685439	0.96435663943173
Endothelial	SCAF8	blue	0.929608394416529	2.96594172585387e-20	0.0832334765421086	0.586730620235267
Endothelial	DHRS7	purple	0.925573778057526	9.43672955070065e-20	-0.203239	0.180562226087152
Endothelial	KCNMB4	brown	0.790750634523307	1.03172703648424e-10	-0.0985734	0.519436321109752
Endothelial	ITPKB	green	0.913538571845666	2.09528205000851e-18	0.241026658480602	0.110718560336613
Endothelial	NCAM2	blue	0.81602184006105	8.50818305051283e-12	-0.0504397	0.74211957503702
Endothelial	TRRAP	green	0.908444763063034	6.81022509708791e-18	0.0870269849530773	0.569731506744008
Endothelial	CDK13	magenta	0.942613041322466	4.18730038216259e-22	0.200624763587371	0.186354136640038
Endothelial	DIRC3	green	0.934635861592937	6.34359908045023e-21	-0.0102945	0.946489364803023
Endothelial	EIF3A	green	0.888720887917026	3.68878634364973e-16	-0.0560812	0.71443533411365
Endothelial	PER3	brown	0.80961873334483	1.65769479657979e-11	0.0662714677810809	0.665357339654424
Endothelial	OBSCN	green	0.924482556810453	1.27621179715155e-19	0.127324961231515	0.404570287243272
Endothelial	PCLO	green	0.895921158572838	9.4296876015213e-17	-0.00794805	0.958674045017604
Endothelial	KCNIP1	green	0.769707287974487	6.43942791038578e-10	-0.118969	0.436344350715771
Endothelial	CCDC68	green	0.873774392976422	4.74713837151989e-15	-0.00877789	0.954363614773591
Endothelial	C15ORF61	purple	0.922980860110454	1.91936953626244e-19	-0.0705224	0.64527226267985
Endothelial	PFDN4	green	-0.895108	1.10539249466671e-16	-0.00806098	0.958087394323946
Endothelial	COL15A1	yellow	0.838271646450046	6.7454579771396e-13	0.603902320327553	1.12280180307448e-05
Endothelial	FCN3	green	-0.116282	0.446850505750832	-0.411574	0.00497112047084135
Endothelial	TJP1	green	0.957511981445605	7.58647498784761e-25	0.121231620712681	0.427606597657654
Endothelial	NCOA1	blue	0.966220455840754	5.97131120641739e-27	0.202763389402743	0.181605884786146
Endothelial	MICAL3	green	0.909535572546451	5.32216186153557e-18	0.265887252111662	0.0775024363710775
Endothelial	MPP3	green	0.815045850332168	9.43423962394652e-12	-0.0862067	0.573387823319514
Endothelial	COL18A1	green	0.743012049291695	5.07280229278019e-09	0.52811820934997	0.000192545007426781
Endothelial	GSK3B	blue	0.970821653654479	2.68334604624661e-28	0.157376327835362	0.301858632214622
Endothelial	DAB1	green	0.870513676430828	7.940432995409e-15	0.0578063513402175	0.706039574662192
Endothelial	MDH1	green	-0.980091	7.92715790766113e-32	-0.15213	0.31846070500934
Endothelial	DAB2IP	green	0.930258204018954	2.44580524309504e-20	0.30006008454778	0.0452167755444003
Endothelial	TNKS	magenta	0.951543192814292	1.20644856769572e-23	0.173008922185666	0.255740661841389
Endothelial	EVL	green	0.887208262692497	4.85478356124952e-16	0.0812283959663579	0.595806171756242
Endothelial	TNRC18	brown	0.929833975681813	2.77448929704122e-20	0.14764105443933	0.333117377324392
Endothelial	BAD	green	-0.948008	5.29184979964029e-23	-0.0594423	0.698109551550269
Endothelial	BEX4	purple	0.953279636252906	5.60164258955666e-24	-0.172962	0.255871883800153
Endothelial	CRYBG3	green	0.927205914722512	5.95612694325047e-20	0.282120639470056	0.0604349623095816
Endothelial	ZMAT2	purple	0.968319072546348	1.53543287966329e-27	-0.134567	0.37814359277798
Endothelial	ABCA6	greenyellow	0.796401139348407	6.08815093906748e-11	0.0781892432344279	0.609678553482482
Endothelial	DIS3L2	magenta	0.965139051781451	1.16314140668581e-26	0.18005122491306	0.236597450003817
Endothelial	LPP	blue	0.981993595429973	9.32384060226933e-33	0.19741701136947	0.193640955327741
Endothelial	CDK6	green	0.888646782869031	3.73910266287896e-16	0.288781773776149	0.0543664903030899
Endothelial	TACR1	yellow	0.844231124099524	3.20460120104342e-13	0.472164697535369	0.00105785380614405
Endothelial	GNG11	purple	0.739256186639098	6.64690560894066e-09	0.141160021178696	0.35500425473103
Endothelial	ACSS3	greenyellow	0.852133508053247	1.13699228375932e-13	-0.199329	0.189273135471267
Endothelial	GRPEL1	purple	0.942362498279398	4.58686776790287e-22	-0.233391	0.122837682914122
Endothelial	BCAS1	black	0.780927773347889	2.48665207739368e-10	0.372700188981089	0.0116900213536157
Endothelial	FHL2	black	0.67300803484913	4.08718685819604e-07	0.569525245793881	4.44433387176341e-05
Endothelial	ERRFI1	green	0.756139886598846	1.89960631216154e-09	-0.0599052	0.695871836244951
Endothelial	PRELID3B	purple	0.935765103256971	4.41126536413266e-21	-0.170875	0.261741466313137
Endothelial	TPRG1	blue	0.839363083738014	5.89923119943558e-13	0.0105597284054055	0.945112750580381
Endothelial	CD86	purple	0.767063848380233	7.99553838936599e-10	-0.268946	0.0740266245716549
Endothelial	MSR1	blue	0.843849642128244	3.36407983149227e-13	-0.119495	0.434302631479712
Endothelial	PPP1R12B	blue	0.96828636489246	1.56936738018394e-27	0.182987497509172	0.228912203749083
Endothelial	SRCAP	green	0.946975783168145	7.99256756373096e-23	0.107344989159933	0.482766098426127
Endothelial	SLIRP	green	-0.964151	2.10069133121643e-26	-0.115374	0.450429832498378
Endothelial	LAG3	purple	0.763255165526466	1.08679354953543e-09	-0.0527004	0.730984924599143
Endothelial	SGPP2	blue	0.846117914095827	2.51546888138191e-13	0.0923496285998467	0.546269946085759
Endothelial	BACE2	yellow	0.905747175361686	1.23685150344628e-17	0.480387582163173	0.00083837879325506
Endothelial	CCDC80	purple	0.49516262692601	0.000543931712671612	0.421118454752435	0.00396729961501891
Endothelial	SLC4A7	green	0.847984969713031	1.97321372119084e-13	0.342203587147225	0.0213957886495627
Endothelial	ZNF75D	green	0.920166239242914	4.03534225788231e-19	0.0863266185551136	0.572852801105354
Endothelial	DPY30	green	-0.971886	1.22022966653519e-28	-0.0791701	0.605186268415473
Endothelial	TNXB	green	0.835623685282846	9.30000786381646e-13	0.347801297919197	0.0192280391584917
Endothelial	ACER2	yellow	0.878809612483891	2.0846315673944e-15	0.284504271882047	0.0582040818259916
Endothelial	SIVA1	purple	0.965812014190147	7.70067888769843e-27	-0.203912	0.179091726156248
Endothelial	GRHL2	greenyellow	0.903744378085616	1.90432962851125e-17	0.131219817556818	0.390228668870086
Endothelial	RND1	purple	0.661449166961449	7.54937950458288e-07	-0.105179	0.49169457745066
Endothelial	HACD4	green	-0.927656	5.23679234977385e-20	-0.189777	0.211802554933826
Endothelial	TRMT11	green	0.917935310588062	7.13468521060431e-19	0.0786762622972684	0.607446228405626
Endothelial	CEACAM6	purple	0.387466373160845	0.00854687271165718	-0.0234932	0.87825359840119
Endothelial	TMEM230	purple	0.953901145017987	4.2264031820553e-24	-0.13952	0.360679045016183
Endothelial	CTNND1	green	0.929662188592404	2.91917830158404e-20	0.298570887958472	0.0463477894692944
Endothelial	HDDC2	green	-0.950063	2.2702905593792e-23	-0.185096	0.223499646907707
Endothelial	NPAS2	blue	0.882364563345201	1.14032653438012e-15	0.0988224405620173	0.518376364996902
Endothelial	UACA	green	0.922704279645498	2.06733034549359e-19	0.289569078533652	0.0536828620982833
Endothelial	YDJC	purple	0.851568290570761	1.22688130044184e-13	-0.0304897	0.842402448982402
Endothelial	HERC1	magenta	0.961935221605592	7.45986538661513e-26	0.122353289147329	0.423311608531828
Endothelial	SHB	green	0.920004034068352	4.20839419286179e-19	0.258331912005446	0.0866396140440358
Endothelial	AMOTL1	green	0.938957780847749	1.52236848690812e-21	0.0909508414066777	0.552390643945234
Endothelial	ATP2C2	greenyellow	0.908755190397322	6.35077351267286e-18	0.00341743779119701	0.982224758564731
Endothelial	EPAS1	green	0.830722041927848	1.66065862822992e-12	0.178762825121654	0.240024547223049
Endothelial	ELOF1	purple	0.961911084267193	7.56041320309601e-26	-0.00671344	0.965089127128048
Endothelial	CEP192	magenta	0.943150204470785	3.43928347506125e-22	0.181115537161213	0.233791704577873
Endothelial	ARHGEF26	greenyellow	0.828667200791014	2.10603426493554e-12	-0.327265	0.0282061843489154
Endothelial	AHCYL2	green	0.898598157158141	5.53527522353412e-17	0.0417923167595523	0.785175078345065
Endothelial	MTX1	purple	0.946410778548872	9.98139490008957e-23	-0.109067	0.4757291420414
Endothelial	ADGRL3	blue	0.863237015218081	2.38449723000896e-14	0.154730406683919	0.310161537704247
Endothelial	RNF139	purple	0.944457237048251	2.11345980105333e-22	-0.149065	0.328424239661868
Endothelial	TRAPPC6A	purple	0.925807128142696	8.84153284690324e-20	-0.125802	0.410260582976566
Endothelial	ANKRD36C	green	0.886496871705923	5.51677681588555e-16	0.339693142439188	0.022432642982382
Endothelial	YWHAH	purple	0.931480901057829	1.6929380054415e-20	-0.165764	0.276489008238184
Endothelial	TOB1	green	-0.836205	8.6715248877844e-13	-0.0881748	0.564632995115011
Endothelial	TNC	blue	0.414912294066338	0.00459734098587246	0.414929538127444	0.00459547590675341
Endothelial	AGBL4	green	0.870420834660345	8.05595229150527e-15	0.126880919013845	0.406224416077479
Endothelial	AC002066.1	green	0.893810352682555	1.42081998753636e-16	-0.057739	0.706366680117366
Endothelial	PPP2R5C	magenta	0.882337466656603	1.1456658604954e-15	0.0155638304232708	0.919174650076482
Endothelial	FCGRT	green	0.954088521177365	3.8793121105927e-24	0.121834892960402	0.425293568319228
Endothelial	APOBEC3G	purple	0.855039399352211	7.65030307445456e-14	0.0128649387799726	0.933155404451061
Endothelial	KIAA0355	green	0.881741492250303	1.26926888044466e-15	0.350562923182672	0.0182287092155404
Endothelial	DPCD	green	-0.920228	3.97107751702199e-19	-0.0363301	0.812711361562356
Endothelial	HERPUD1	green	0.860154300113189	3.72847416144723e-14	0.0143302180610775	0.925562252265344
Endothelial	LEF1	yellow	0.863476947496514	2.30191830642786e-14	0.605242688714789	1.06069257579611e-05
Endothelial	CYP3A5	brown	0.715935274392654	3.23066860886395e-08	0.00434512560761705	0.977400654762279
Endothelial	TMEM164	green	0.877081593889062	2.7761470105271e-15	-0.0654977	0.6690388704937
Endothelial	PEG10	purple	0.535703548775743	0.000149293374170711	-0.344836	0.0203519429523611
Endothelial	ZNF462	green	0.876870714780807	2.87407044302637e-15	0.312948117406652	0.0363366169517024
Endothelial	ECHS1	purple	0.94186060408357	5.49893413336818e-22	-0.0495559	0.746486838307483
Endothelial	RSL1D1	purple	0.972315849305052	8.79595315749199e-29	-0.171957	0.258687757818544
Endothelial	ZNF710	green	0.931982653288538	1.45283802364734e-20	0.122598339996599	0.422376535506776
Endothelial	SCGB2B2	blue	0.964231402229384	2.00311808621195e-26	0.1188161718668	0.436938236829886
Endothelial	LARP4B	green	0.920818327921858	3.40547503955807e-19	0.0634926956307021	0.678614166870733
Endothelial	SMC5-AS1	green	0.914609924657517	1.62018144500897e-18	-0.0138833	0.92787743756315
Endothelial	ABCA10	greenyellow	0.902310551549599	2.57883294688189e-17	0.0820936708141379	0.591882124243801
Endothelial	MAMDC2	greenyellow	0.827117820438027	2.51404022071781e-12	-0.0467671	0.760318731108354
Endothelial	BAG1	purple	0.95562730050477	1.89287437222215e-24	-0.0550902	0.719273247244121
Endothelial	MZT1	green	-0.923623	1.61361268409743e-19	-0.0670386	0.661714967204701
Endothelial	RALGAPA1	blue	0.96913779592408	8.81634806384858e-28	0.20280470298519	0.181515019703031
Endothelial	TNFSF12	purple	0.917843714347991	7.30106126184649e-19	-0.121561	0.426341663208988
Endothelial	MAD2L2	purple	0.940314677197095	9.51823304089727e-22	-0.109327	0.474674367004469
Endothelial	TMEM14A	green	-0.93009	2.57166806288885e-20	-0.165104	0.278432503449965
Endothelial	NDUFA12	green	-0.959811	2.34684956221806e-25	-0.224673	0.137865532557679
Endothelial	FAM32A	purple	0.950519795805243	1.87156284870754e-23	-0.0918824	0.548310900781872
Endothelial	SNHG8	purple	0.921525628614888	2.82824697260038e-19	-0.18127	0.233386855338846
Endothelial	SLC8A1	blue	0.901767263450854	2.88927142161912e-17	0.130367745534673	0.393340410435218
Endothelial	AKR1C2	purple	0.647414240683603	1.53617483038702e-06	-0.325035	0.0293626944996847
Endothelial	PIK3C2A	green	0.926218780866358	7.87749981567901e-20	0.248796039731708	0.0993448425217161
Endothelial	EBP	green	-0.951394	1.28694700171281e-23	-0.226516	0.134580493724198
Endothelial	KLHL4	yellow	0.87924591457854	1.93783828581117e-15	0.354190134734471	0.0169830848142332
Endothelial	SURF2	purple	0.893947880661139	1.38373568201093e-16	-0.135018	0.376533706808113
Endothelial	ANTXR1	blue	0.846386256453157	2.42968377660235e-13	0.414347367420367	0.00465880887682464
Endothelial	TTLL3	green	0.908559908050854	6.63624068055401e-18	0.226108158770186	0.135302322836329
Endothelial	ASCC3	blue	0.976873623929695	1.92415945285566e-30	0.180315597469224	0.235898375931911
Endothelial	DOK5	turquoise	0.680056219438306	2.77385383931868e-07	0.5213895953241	0.000240093952930625
Endothelial	SERTAD3	purple	0.954150517603307	3.77056945486431e-24	-0.0984337	0.520031249444626
Endothelial	PPP6R3	blue	0.952508264658925	7.90434695620241e-24	0.177163811077617	0.244324593546902
Endothelial	FUCA1	green	-0.909124	5.84257509908561e-18	0.0311821752480001	0.838869697361819
Endothelial	UBR3	blue	0.974230978345775	1.91939785288099e-29	0.134867409139621	0.377071808857474
Endothelial	MT2A	purple	0.678769817721865	2.97954696551603e-07	-0.191048	0.208702547804026
Endothelial	RNF180	green	0.899845144978042	4.29697052916961e-17	0.150128275656375	0.324946046284431
Endothelial	UNC5C	blue	0.839871196425703	5.54045787060286e-13	0.181490885978715	0.232807656539283
Endothelial	RFK	green	-0.891395	2.24769652425169e-16	0.0266832310642995	0.861872976569668
Endothelial	CFTR	greenyellow	0.840192197984779	5.32453673007732e-13	0.177132566252538	0.244409132992253
Endothelial	HMGN2	purple	0.975699588676706	5.51533669973184e-30	-0.162421	0.286427066819068
Endothelial	ATR	magenta	0.949474482216379	2.90307583855815e-23	0.109464150351689	0.474115072086175
Endothelial	FBLN1	purple	0.581682991820185	2.78101474886244e-05	0.101985729922148	0.505008035096958
Endothelial	MRPL15	green	-0.949686	2.65877080079237e-23	-0.0325686	0.831806529208437
Endothelial	LY96	green	-0.836033	8.85298842664942e-13	0.09450053906918	0.536921905335602
Endothelial	ARHGAP44	green	0.821374077920974	4.77515154051774e-12	-0.104366	0.495066032104944
Endothelial	MAGOH	green	-0.955089	2.43999517865505e-24	-0.120215	0.431519239766623
Endothelial	SRM	green	-0.733259	1.01385272054922e-08	0.039458958607486	0.796908402776483
Endothelial	POP4	purple	0.938723538936359	1.64913775260698e-21	-0.22613	0.135264225849671
Endothelial	C16ORF89	purple	0.729964830009376	1.27238075526184e-08	-0.0713275	0.641495710772692
Endothelial	PTGFR	greenyellow	0.769726471359476	6.42925428474018e-10	-0.311411	0.0373136879553706
Endothelial	CPXM2	yellow	0.81118783048966	1.41102440757254e-11	0.469672408343307	0.00113381409668449
Endothelial	TNNI2	purple	0.706644839655346	5.81183238932477e-08	0.00135565960579177	0.992948285019176
Endothelial	SPTLC3	green	0.921522427127892	2.83063667070706e-19	0.128492390226931	0.400240010221378
Endothelial	PDZRN4	blue	0.857663992042484	5.30909003338431e-14	0.256167003621961	0.0894066611085884
Endothelial	CLDN18	pink	0.563802496152505	5.50674678351427e-05	-0.538537	0.000135546498877945
Endothelial	SVEP1	greenyellow	0.89455397122003	1.23096634893211e-16	-0.170641	0.262403943497045
Endothelial	TMEM100	brown	0.383089290860896	0.00939186763864663	-0.236316	0.118081751688422
Endothelial	GLRX5	purple	0.931816678781286	1.52842967963426e-20	-0.0679671	0.657316830088721
Endothelial	AASS	green	0.888889725732292	3.57653419239613e-16	0.0752873430952929	0.623052029559618
Endothelial	IFITM3	green	-0.948676	4.03403523569695e-23	-0.069554	0.649826470323183
Endothelial	ADIRF	purple	0.910986089265168	3.81586839221282e-18	-0.0973381	0.524709665340903
Endothelial	CCDC171	green	0.919301364155827	5.04280972690811e-19	0.209726191770157	0.166747796252279
Endothelial	MAPK8	blue	0.943992252970338	2.51656181551575e-22	0.126100267158866	0.40914189326926
Endothelial	PLEKHH2	greenyellow	0.88638207478497	5.63130882586263e-16	0.0435809695349894	0.776212439045031
Endothelial	ITPR3	green	0.909936365746821	4.85742865732831e-18	0.0651834151423125	0.670536429244613
Endothelial	IER5	purple	0.890650264912308	2.58353535509057e-16	0.0228742328755418	0.881438063753729
Endothelial	NUDT16L1	purple	0.897471653763851	6.93860489216882e-17	-0.01848	0.904095311138204
Endothelial	ZNRF3	green	0.930457266849387	2.30466090601165e-20	0.145945234105496	0.338761380906288
Endothelial	ALS2CL	brown	0.935117617364481	5.43718173585587e-21	0.0704412676145156	0.64565324855546
Endothelial	LSM7	purple	0.976354955579361	3.08397403711545e-30	-0.0792422	0.604856399408415
Endothelial	NOVA2	green	0.911696334758779	3.23549409359961e-18	0.154154413267382	0.311988098322636
Endothelial	WNK2	turquoise	0.85152052400122	1.23477814326218e-13	0.41963099718086	0.00411097718033239
Endothelial	HSD3B7	purple	0.860604526906985	3.49516069362131e-14	0.0947983408264609	0.535633776345088
Endothelial	ROBO4	brown	0.886499969778762	5.51371670362396e-16	0.162413757414832	0.286449439038985
Endothelial	ZSWIM5	green	0.951418959721599	1.27314147168387e-23	0.160813325439743	0.291288468240813
Endothelial	DIP2B	blue	0.968010436639871	1.88548326433066e-27	0.201719549888893	0.183912518533613
Endothelial	RABGAP1L	magenta	0.955245399622823	2.26716341390216e-24	0.162008508580857	0.287669758288364
Endothelial	CDYL	green	0.897807839652178	6.48791959055697e-17	0.221368806624521	0.143905697956805
Endothelial	ADAM23	yellow	0.83910887057075	6.08686108980069e-13	0.441674050220659	0.00238679002330166
Endothelial	PCDH7	yellow	0.92846934229669	4.14036470355713e-20	0.492344313221526	0.000591615340104681
Endothelial	KRT18	purple	0.802716248022871	3.3101004865916e-11	-0.231201	0.12649042722203
Endothelial	DTNA	blue	0.877924801857927	2.41528360663032e-15	-0.0576823	0.706642167375414
Endothelial	EPHA7	green	0.205582094419455	0.175480839427878	0.0637204257488811	0.677524039941672
Endothelial	RTEL1	green	0.952006786916759	9.85742669577287e-24	0.0873978931282709	0.568081671946389
Endothelial	SLX4IP	green	0.942861386407001	3.82404939382463e-22	0.244056056852353	0.106171331734606
Endothelial	MAST2	green	0.923389259557968	1.71915705292514e-19	0.163555160192755	0.283030503488977
Endothelial	DUSP23	purple	0.944051195910877	2.46168842523485e-22	0.01131073860908	0.941215751646117
Endothelial	STK3	green	0.973625678795426	3.14305029432893e-29	0.105879315426164	0.488797430195976
Endothelial	ZFP36	blue	0.673774097123033	3.92055367861229e-07	-0.0643676	0.674429764277531
Endothelial	EDIL3	blue	0.863689769051614	2.23094226220932e-14	-0.00419929	0.978158976107381
Endothelial	CHRAC1	green	-0.909565	5.28643232424737e-18	-0.0469636	0.759341993350072
Endothelial	GADD45B	purple	0.877628504924076	2.53669928055034e-15	-0.243911	0.106385660835267
Endothelial	TMEM109	green	-0.878741	2.10861040129208e-15	0.0246405011692675	0.872356146239953
Endothelial	PDZRN3	greenyellow	0.809584581326886	1.66349058013332e-11	0.10836956550284	0.478573188196685
Endothelial	TYW1B	magenta	0.966967112444154	3.72039793476767e-27	0.0602342039110787	0.694282449240073
Endothelial	NDUFS8	purple	0.974869645660747	1.12610386643614e-29	-0.184162	0.225887026852131
Endothelial	ADRM1	purple	0.957926306053352	6.17073421978488e-25	-0.22113	0.144350205720638
Endothelial	LINC00630	blue	0.97096209021083	2.42232655380895e-28	0.138095577134889	0.365650891409278
Endothelial	PLEKHA5	greenyellow	0.812339222171023	1.25250022875669e-11	0.300446842227177	0.044926741639752
Endothelial	ENKUR	green	-0.769594	6.49963617683845e-10	0.0710613821746339	0.642742913754076
Endothelial	NFATC2	yellow	0.690132494634106	1.56413344077608e-07	0.279206867252472	0.0632542921590127
Endothelial	OSTC	purple	0.962406296712886	5.73447884771363e-26	-0.183375	0.227910359028177
Endothelial	SFN	purple	0.695353863449351	1.15185404688143e-07	0.0685606601460478	0.654511260871873
Endothelial	SPINT2	green	-0.924967	1.11671200832022e-19	-0.136587	0.370960458616763
Endothelial	CMIP	green	0.934154088021156	7.39251708563651e-21	0.347901816073344	0.0191908720408622
Endothelial	VPS54	magenta	0.934839945399208	5.94335151687332e-21	0.124395922854082	0.415553048786531
Endothelial	NTNG1	green	0.916470604701137	1.02821405654176e-18	0.00389846048158016	0.979723285611281
Endothelial	NDUFAF4	purple	0.923822698392196	1.52844039273028e-19	-0.149102	0.328300756202119
Endothelial	RP1	greenyellow	0.728625364784237	1.39419312127045e-08	0.135721389552172	0.374030076223791
Endothelial	SSBP2	blue	0.948064081368493	5.17357974593563e-23	0.166939084795918	0.273051703543038
Endothelial	PELI1	blue	0.840384144762877	5.19924892778334e-13	0.00194272614731622	0.989894683185165
Endothelial	METRN	purple	0.720908154221588	2.33687317210948e-08	0.131515700376611	0.389151499449805
Endothelial	ARHGAP12	blue	0.919313150241856	5.02760115447315e-19	0.123401718263317	0.419319179336385
Endothelial	VPS13A	green	0.943824625459636	2.67904515761037e-22	0.14155351337469	0.353650979524406
Endothelial	SKIL	green	0.925983780093058	8.41485924784953e-20	0.0787101774183243	0.607290904482017
Endothelial	PPP1R16B	green	0.8893242197933	3.30235953055281e-16	0.324760714543667	0.0295078452399041
Endothelial	RUNX3	purple	0.762442349369985	1.15951018025285e-09	-0.156396	0.304919227115977
Endothelial	HECTD2	magenta	0.958198721780862	5.38102592420455e-25	0.228834124734799	0.130530771705257
Endothelial	COL3A1	brown	0.618381572664351	5.98768829574746e-06	0.320021099098394	0.0321074619481575
Endothelial	TIFA	purple	0.934162806775302	7.37214936643438e-21	-0.0523242	0.732834109354025
Endothelial	PDZD11	green	-0.933269	9.76253834782418e-21	-0.0769872	0.615203173999985
Endothelial	TPRKB	green	-0.946161	1.10015241058079e-22	-0.0349446	0.819733139514575
Endothelial	TGFBI	purple	0.902416052785864	2.52233940930514e-17	-0.0447485	0.770377564081799
Endothelial	BHLHE41	purple	0.817152486634924	7.54267014578484e-12	-0.293555	0.050327426599712
Endothelial	RUSC2	green	0.949052645829773	3.45664535057152e-23	0.0811303299825867	0.596251624817597
Endothelial	NPAS3	green	0.897408827407524	7.02605661904415e-17	0.376209599534761	0.010865090203308
Endothelial	SPATA6L	green	0.930199419894651	2.48903223841842e-20	0.190065169268106	0.211097293952454
Endothelial	HDAC7	green	0.926450044273176	7.3806248810582e-20	0.251261963210432	0.0959296884842652
Endothelial	ADGRG6	green	0.906147300882895	1.13337226885229e-17	0.160547755483709	0.292096537158186
Endothelial	CKB	purple	0.718586499295451	2.72065287514152e-08	-0.206581	0.173346854345203
Endothelial	FAM184A	green	0.843174033148405	3.66508144921752e-13	-0.014315	0.92564131819066
Endothelial	DNAJB6	green	0.877891047761831	2.42883215602307e-15	0.039632565813565	0.796033855666451
Endothelial	ATP6V0E1	green	0.965980288468884	6.93719778238966e-27	0.0790871302166334	0.605565694989418
Endothelial	AK6	purple	0.934963523006854	5.71278596924338e-21	-0.0881939	0.564548599717333
Endothelial	NME4	purple	0.916329069604238	1.06479409559779e-18	0.0497051475143095	0.745748818752839
Endothelial	LDLRAD3	yellow	0.883325456390053	9.65525386287326e-16	0.222084146552118	0.14258184307702
Endothelial	COG5	blue	0.944421083171366	2.14245673695134e-22	0.0890722873596118	0.560661386638156
Endothelial	RNPC3	green	0.933099987292901	1.02910957616969e-20	0.112378423921402	0.46235369019486
Endothelial	RBM42	purple	0.964712079108855	1.50471563074386e-26	-0.143671	0.346423570873633
Endothelial	DMTF1	blue	0.878787930005672	2.09219463738e-15	0.0623105395084676	0.684283444914807
Endothelial	ADGRA3	green	0.903042806871434	2.21018843160325e-17	0.133878441753686	0.380612665405893
Endothelial	SRGAP1	blue	0.852840873915639	1.03325745658392e-13	0.306022438058981	0.0409111120580958
Endothelial	DNAJC19	green	-0.97503	9.82800151196291e-30	-0.0950536	0.53453101515409
Endothelial	ST13	purple	0.971852966691647	1.25060162581175e-28	-0.0587412	0.70150450112029
Endothelial	GIMAP5	green	0.85939165667933	4.15764579418248e-14	0.0456011589090585	0.766124121565317
Endothelial	MRPL14	green	-0.936796	3.1477537957085e-21	-0.317338	0.0336608898496981
Endothelial	LCORL	blue	0.870277729536964	8.23713384843016e-15	-0.0410301	0.789002624416726
Endothelial	ARHGAP23	green	0.900038680292664	4.13013805907955e-17	0.346876653844003	0.0195727862261964
Endothelial	VAMP5	purple	0.926686845530603	6.9027878462449e-20	-0.00549052	0.971445567685404
Endothelial	BCKDK	purple	0.947759127036856	5.84962871994198e-23	-0.126035	0.409386288296932
Endothelial	PLOD2	green	0.797121535788498	5.68545770116137e-11	0.275465840311901	0.0670266774355272
Endothelial	ANKAR	green	0.941644072690834	5.94351110765815e-22	0.0811804171558126	0.596024091507072
Endothelial	NUDT15	green	-0.910454	4.3140866819486e-18	-0.0814842	0.594644939840961
Endothelial	ORAI3	purple	0.928389238674963	4.23776503305862e-20	0.023574245596188	0.87783682561992
Endothelial	EDA	green	0.923553894838045	1.6441972949113e-19	-0.0315422	0.837034100921302
Endothelial	NDUFB8	purple	0.968878481508699	1.05268235824383e-27	-0.137996	0.366000629556485
Endothelial	TTC7B	green	0.912721379451461	2.54366552997084e-18	0.241599978299466	0.109846801588046
Endothelial	HACE1	green	0.920602952226375	3.60238631393875e-19	0.188927217184057	0.213894312476471
Endothelial	SH2D3C	green	0.875646109880309	3.51061604067542e-15	0.173514959045219	0.25433146559737
Endothelial	C19ORF33	purple	0.747656757801329	3.6081707346126e-09	-0.221285	0.144060982495286
Endothelial	NEURL1B	green	0.797300978915861	5.58912766757892e-11	0.521099922490541	0.000242361036449438
Endothelial	DYNLT1	purple	0.965134461388602	1.16638548364919e-26	-0.14954	0.32686581061839
Endothelial	PID1	blue	0.889143130158572	3.41411669521517e-16	-0.0784388	0.608534278823913
Endothelial	MIRLET7BHG	green	0.936250150588537	3.76628873305643e-21	0.278424763743525	0.0640286217589873
Endothelial	SPOCD1	purple	0.635018707386945	2.79348277731837e-06	-0.227302	0.133197377058666
Endothelial	SH3PXD2A	green	0.860614970857668	3.48991609694857e-14	0.339011045359837	0.0227215287972494
Endothelial	BEX2	purple	0.736012930547659	8.36340672303207e-09	-0.317433	0.0336053252801215
Endothelial	RASGEF1B	blue	0.877763172602311	2.48081581708895e-15	-0.0371857	0.808382500334732
Endothelial	ASNSD1	purple	0.951885736582973	1.039341747975e-23	-0.100582	0.5109181123345
Endothelial	SNX30	green	0.847948736672372	1.98259409485301e-13	-0.033236	0.828411177524281
Endothelial	ABLIM3	green	0.889538281612554	3.17472617082896e-16	0.330904697529775	0.026400134007729
Endothelial	STK39	blue	0.906297499334861	1.09669291565223e-17	0.0566667546454508	0.711581816260286
Endothelial	FMO5	greenyellow	0.823671023507064	3.70485395724222e-12	-0.353685	0.0171519726879837
Endothelial	DHRS4L2	green	-0.899306	4.79633329140222e-17	-0.154926	0.309542620329224
Endothelial	PSMG3	purple	0.951505278378921	1.22644165899229e-23	-0.0495393	0.746568959891231
Endothelial	CDH11	yellow	0.828140706381007	2.23709628855831e-12	0.307408949675873	0.0399594700018739
Endothelial	RHOH	purple	0.887588401258356	4.53265006527569e-16	-0.153112	0.315311718727937
Endothelial	MEDAG	black	0.499549339278025	0.000476553851120799	0.268817483231614	0.0741696149328081
Endothelial	EZR	greenyellow	0.779438201216619	2.83040308064727e-10	0.00641699119665475	0.96662980057072
Endothelial	TNFRSF4	purple	0.632719018321517	3.1122605624952e-06	0.11255720558103	0.461637316534357
Endothelial	HRH1	green	0.828596843538718	2.12311896107873e-12	0.33883882126015	0.0227949611099532
Endothelial	ADAM17	green	0.886135740229372	5.88472712292525e-16	-0.0231585	0.87997526124574
Endothelial	HPSE2	yellow	0.780602688275015	2.55814098100278e-10	0.385056327512605	0.00900363522725212
Endothelial	MRPL27	green	-0.974574	1.44420344789269e-29	-0.102828	0.501479615615281
Endothelial	MYO5C	green	0.862849849950047	2.52368942661993e-14	0.102745323160532	0.501824234272687
Endothelial	PEBP4	greenyellow	0.729602111853135	1.30434414443112e-08	-0.507882	0.000368864059555569
Endothelial	MYO1B	green	0.910532548790272	4.23678508754421e-18	0.0316753488819554	0.836355781417136
Endothelial	C6ORF226	purple	0.886052930103873	5.97231931372885e-16	-0.0609934	0.690620481698779
Endothelial	HEXA	magenta	0.938328200396984	1.88614414839781e-21	0.0906552802123336	0.553688078117042
Endothelial	LINC01169	brown	0.81533077999335	9.15450338659267e-12	-0.0100653	0.947679086688019
Endothelial	SPTSSA	purple	0.847716476464869	2.04373263655859e-13	-0.357045	0.0160539544453126
Endothelial	CYP7B1	blue	0.876304089595936	3.15365130149929e-15	0.10701694371469	0.484112626990823
Endothelial	SSH1	green	0.875333020452598	3.69360536255079e-15	0.202893425918838	0.181319992500488
Endothelial	TTLL5	blue	0.919291537544154	5.05552321380652e-19	0.145686123617769	0.339628931546715
Endothelial	CUX1	green	0.950866213815255	1.61476802639673e-23	0.0920871254781337	0.547416110030688
Endothelial	ABCA13	yellow	0.807355108080502	2.086029956716e-11	0.337391364252659	0.023420017532009
Endothelial	SHC2	green	0.892556183513003	1.80536054341998e-16	0.308620013450148	0.0391431391398611
Endothelial	TNS1	green	0.913494138530939	2.11759548006234e-18	0.127493980062018	0.403941687504287
Endothelial	HCCS	green	-0.952839	6.82497899892447e-24	-0.165701	0.276674688111793
Endothelial	USP24	blue	0.937276203913468	2.68473577669673e-21	0.0627515107792453	0.682166646698046
Endothelial	ABHD14B	green	-0.914143	1.81298523311554e-18	-0.134941	0.376807469539256
Endothelial	ABCC1	green	0.943444338294991	3.08543856722952e-22	0.192762779157761	0.204568931089071
Endothelial	CHST15	yellow	0.836295375944727	8.57705910065422e-13	0.329823781456789	0.0269261922294381
Endothelial	NRF1	magenta	0.956084724337831	1.5217826393125e-24	0.15313821649257	0.31522724828954
Endothelial	CNTNAP3B	green	0.801061330980824	3.89137205608391e-11	0.389616175943593	0.00815643306165718
Endothelial	PLA2G4C	brown	0.816030891498314	8.50001044160387e-12	0.288361369556022	0.0547343922473703
Endothelial	ADAMTS4	purple	0.430302758659408	0.00317369634265639	0.247715505899328	0.100870474914897
Endothelial	EHMT1	green	0.95410713154612	3.84635975257752e-24	0.156791272365415	0.30368213097479
Endothelial	CLPP	purple	0.963195596836915	3.66252058392011e-26	-0.147187	0.334623865335435
Endothelial	CCDC102B	brown	0.715481524297302	3.32643930996234e-08	0.0375830931740917	0.806373563889622
Endothelial	TBCD	green	0.945472119004907	1.436257279205e-22	0.298349183345228	0.0465181170458014
Endothelial	DYNLT3	purple	0.913738656840133	1.99754041282479e-18	-0.203197	0.180653471262515
Endothelial	FREM2	green	0.765461982989034	9.10363502817535e-10	-0.143947	0.345486598164692
Endothelial	RABIF	purple	0.934238188163177	7.19826258414324e-21	-0.199437	0.189028811534876
Endothelial	TRIM66	green	0.946557912001073	9.42239262289278e-23	0.131747524959934	0.388308756593297
Endothelial	SLC26A9	greenyellow	0.671571644040552	4.41751007177555e-07	-0.350245	0.0183414185030453
Endothelial	LINC00578	magenta	0.843840676107905	3.36791679111748e-13	0.178434136169279	0.240904223628874
Endothelial	SNX29	green	0.937353300693111	2.61670751111382e-21	0.109702796274847	0.473146027017893
Endothelial	DDX39B	green	0.955068233482967	2.46378783210134e-24	0.0880453355928647	0.565207081607015
Endothelial	SPTBN1	green	0.947725656218733	5.92874759995488e-23	0.13711233181842	0.369107237068508
Endothelial	SLIT3	greenyellow	0.80055271180732	4.08851156497093e-11	0.178208655084012	0.241508947885675
Endothelial	PPM1H	green	0.924589425617802	1.23928301492511e-19	0.15542302351389	0.307974185150499
Endothelial	SCAI	green	0.898830350674702	5.28164773985129e-17	0.0186279822654489	0.90333117401468
Endothelial	STRADA	green	0.971698729719642	1.40436596869348e-28	0.156517591085276	0.304537558267206
Endothelial	MAFF	purple	0.849280629410307	1.66406136132615e-13	-0.105962	0.488457463872704
Endothelial	BMPR1A	green	0.832577635608429	1.33632177739368e-12	0.0922327834680039	0.546779983761358
Endothelial	TMEM9B	purple	0.961644389747336	8.76076490704521e-26	-0.100454	0.511461359844411
Endothelial	SSB	purple	0.967943141965572	1.97130561816119e-27	-0.167301	0.27199940636964
Endothelial	ELP4	blue	0.924671294110072	1.21168222246014e-19	0.136340906191131	0.371832656076356
Endothelial	FUT8	blue	0.958476445353373	4.67547927190643e-25	0.310525421159867	0.0378864674016663
Endothelial	PXDN	green	0.871875963229673	6.4157253915331e-15	0.368359050988819	0.0127840882448266
Endothelial	DCBLD1	green	0.879857628939358	1.74843742750413e-15	0.346396486824212	0.0197538576278211
Endothelial	MMP23B	purple	0.442328056269436	0.00234729764686002	-0.154723	0.310185794910699
Endothelial	EFCAB13	green	0.928869144969085	3.68520471829018e-20	0.219884302513869	0.146681990582223
Endothelial	RASSF8	blue	0.870100241232067	8.46720926146614e-15	-0.0912429	0.551110152401089
[truncated: 27,614 more rows]

## Sheet: Table S4(MM_GS_Endothelial)
Table S4: MM and GS in Endothelial cell
Gene	Module	MM	p.MM	GS	p.GS
TNR	green	0.98941076349471	1.10729390229258e-37	0.116170620280133	0.447287357299402
C5orf17	green	0.97898746157136	2.50207194875146e-31	0.122901891647953	0.421219853722205
MT-ND2	green	-0.942487	4.38423550467857e-22	-0.0339807	0.824625998143897
FTL	green	-0.97974	1.1507091418823e-31	-0.226998	0.133729892326168
MT-ATP6	green	-0.944449	2.11997027483775e-22	-0.00355983	0.981484280336727
XIST	green	-0.151453	0.320644115195727	-0.049572	0.746407097108376
SFTPB	green	0.963183367755123	3.68832500496563e-26	-0.0266537	0.862024223685423
MT-CO3	green	-0.947901	5.52623215706279e-23	0.00031488781396545	0.998362033148332
IGLC2	purple	0.879167054588669	1.96362407727299e-15	0.0567440725620341	0.711205324208125
MT-CO1	green	-0.942587	4.2273343004795e-22	0.00491237274712798	0.974451273801918
FTH1	purple	0.969128053371284	8.87552038296085e-28	-0.21613	0.153880177101164
TMEM190	green	-0.882553	1.10392575901283e-15	0.00529383155143432	0.972468079658304
MT-CO2	green	-0.942489	4.38070952841607e-22	-0.0284529	0.852810045221733
HBA2	purple	0.872336341920883	5.96642376907756e-15	-0.254329	0.0918089638186242
UTY	green	0.248869149756047	0.0992422617019367	0.198391815673336	0.191405544250824
NEAT1	magenta	0.986065844323672	3.91830621845695e-35	0.111379796968403	0.4663661473275
SAA1	purple	0.833233556547085	1.23673925615042e-12	-0.0681267	0.656562220796142
MT-CYB	green	-0.900762	3.55940687958375e-17	0.016910231802187	0.912208781948743
SAT1	green	0.981876021592568	1.07117637117455e-32	0.116044220738173	0.447785160236457
RPL21	purple	0.984635400125061	3.15824165060033e-34	-0.155132	0.308890655895895
MT-ND4	green	-0.907841	7.79527058731877e-18	0.00703124411477375	0.963437572230802
RPS17	purple	0.985232424241011	1.35501334533576e-34	-0.113437	0.458121410015069
SPP1	purple	0.747935088455288	3.53443214707482e-09	0.211921246114001	0.16225181784106
MMP7	green	-0.747713	3.59322224433141e-09	0.351851387214368	0.0177776828749326
GCHFR	purple	0.952932329578063	6.54576031819176e-24	-0.150883	0.322491636381795
NALCN	green	0.945329216440467	1.51721574626806e-22	0.117052082726498	0.443824320734604
RPS5	purple	0.98094884908116	3.10268940468229e-32	-0.146897	0.335585435991596
TMSB4X	purple	0.974523205858864	1.50636444303302e-29	-0.154671	0.310348145432656
RPS10	purple	0.979407056518771	1.62839521584857e-31	-0.121546	0.426402238838296
CFD	green	-0.958409	4.83875429631528e-25	-0.144441	0.34381666409578
MT-ND1	green	-0.91355	2.08964041564438e-18	-0.0315113	0.837192075951297
RPL7	purple	0.975742376182139	5.31252117434458e-30	-0.138665	0.363659613334591
PRKG1	green	0.960265451616169	1.84657208622239e-25	0.0775825698385253	0.612464238974515
KRT17	black	0.885576387483733	6.50089065167364e-16	0.320567033200659	0.0317987018670867
RPS18	purple	0.978105116267529	6.00603550464128e-31	-0.123298	0.419712736188999
RPL23A	purple	0.983354564204339	1.74419864781217e-33	-0.127612	0.403501297110501
RPL13A	purple	0.982480866552099	5.19427979504988e-33	-0.124017	0.41698745931053
RPL27A	purple	0.981377939913932	1.90927865718642e-32	-0.136423	0.371541419359183
ANO2	green	0.976420782344864	2.90644972171837e-30	0.174093218473083	0.252727537695378
JCHAIN	purple	0.881776288423862	1.26171800534027e-15	0.0723866164730134	0.636541042004754
RPS4X	purple	0.977261135105997	1.3431443429061e-30	-0.115514	0.449877239842409
TTTY14	green	0.308612792638846	0.0391479656129532	0.274803954953862	0.0677123333438189
RPS20	purple	0.982338005722047	6.17654723117557e-33	-0.138703	0.363524198157566
AFF3	green	0.924746587420427	1.18681448680594e-19	-0.0429569	0.779336311438446
USP9Y	green	0.249151101552191	0.0988474178809296	0.201607043066196	0.184162375070447
KDM5D	green	0.0327873519815817	0.830693377450899	0.206225047838032	0.174104775253959
COX8A	purple	0.94940206092744	2.99169416247687e-23	-0.0790679	0.605653663175036
NDUFA4	purple	0.976015381880699	4.1763107170671e-30	-0.127648	0.403369219144998
RPS27A	purple	0.979357064119049	1.71468919031866e-31	-0.11896	0.436378751716518
RPL39	purple	0.950572112829673	1.83043466741118e-23	-0.0360688	0.814034222133829
DDX3Y	green	-0.124213	0.416243223662685	0.104017289966447	0.49651588426177
IGHG3	purple	0.837049109072783	7.82910890769551e-13	0.0805037372557321	0.599101295796527
TUBA1B	purple	0.967316903212464	2.96960220617341e-27	-0.125168	0.412641330988748
RPL18A	purple	0.977534276431868	1.03862017608514e-30	-0.156831	0.30355813115165
NTM	blue	0.659637046891961	8.29184414768853e-07	0.0933268512002908	0.542013224452608
ST6GALNAC3	blue	0.977098737381128	1.56269230123629e-30	0.0849006247492484	0.579232045716952
RPL29	purple	0.974937664400148	1.06307553251102e-29	-0.122621	0.422291194346363
RPS23	green	-0.97372	2.91197943959595e-29	-0.106662	0.485573561374221
FAU	purple	0.971332377153684	1.84499421792902e-28	-0.147255	0.334396446653926
UBA52	purple	0.986173914792735	3.3178770539162e-35	-0.138735	0.363414570784501
ALDOA	purple	0.984008502360985	7.4159859785144e-34	-0.198913	0.190218339116139
MAGI1	magenta	0.974646889831973	1.35838034371401e-29	0.191482676960669	0.207648962603419
FBXL7	magenta	0.974293859199654	1.82231367426489e-29	0.210045218368406	0.166088806088746
RPL34	purple	0.96848490634321	1.37385845693441e-27	-0.107532	0.481998181339208
FTX	magenta	0.987545171860354	3.56005364575678e-36	0.192561860587364	0.205050225064626
DDX5	green	0.983540438121041	1.37258522100952e-33	0.113588714280708	0.457515787402038
RPL19	purple	0.975089643873955	9.34164997296372e-30	-0.139501	0.36074510844625
PLA2G2A	purple	0.825515203378576	3.01388633211842e-12	-0.143739	0.346190541882301
RPS15A	purple	0.973840823807265	2.6411754479096e-29	-0.109262	0.474936485481768
IGHA1	purple	0.762098275395167	1.19164747910788e-09	0.120439067691438	0.430656068237797
RPL12	purple	0.985719179940034	6.62327322613104e-35	-0.135472	0.374917865620231
SFRP2	purple	0.7962017095511	6.20428849857295e-11	0.283590182477096	0.0590516604578614
RPS13	purple	0.978083938184597	6.1308991693518e-31	-0.143477	0.347081319544083
RPS12	green	-0.970152	4.3403349876196e-28	-0.138378	0.364662598342471
LRRFIP1	green	0.985184874235645	1.45129878032879e-34	0.127041213225521	0.405626845604812
TPPP3	purple	0.94712833362226	7.52400679378253e-23	0.0627187935735388	0.682323616800696
DYNLL1	purple	0.976118757177444	3.80983278374391e-30	-0.0424377	0.781937790783832
LINC00278	green	0.190300245537063	0.21052268505779	0.202303823201356	0.182618850614508
B2M	green	-0.97091	2.51583801863739e-28	-0.146819	0.335845728276281
MACROD2	blue	0.911573952590826	3.32912391004703e-18	-0.0791188	0.605420794983878
NCKAP5	green	0.890111840900229	2.85539510495873e-16	-0.0586011	0.702183123294017
RPL35A	green	-0.980671	4.22279068871112e-32	-0.127873	0.40253421169934
RPL27	purple	0.986216441233276	3.10654894184548e-35	-0.129218	0.397561498378694
FAM183A	purple	0.828803621648517	2.07327664884413e-12	0.0704138051732736	0.645782257377345
MUC5AC	black	0.768698054664273	6.99650502899136e-10	0.182584345193029	0.229957115160732
PALM2-AKAP2	magenta	0.975581084731523	6.11626411545709e-30	0.0999764476648486	0.513479075724769
PHLDA2	purple	0.929071011661478	3.47386158250913e-20	-0.0912098	0.55125507816044
UQCRB	purple	0.970361302178491	3.73988507124677e-28	-0.0742024	0.628083293808748
DBI	purple	0.973199372733425	4.41808860714163e-29	-0.190594	0.209805405328907
RPLP1	purple	0.959260803761255	3.12724733988481e-25	-0.107708	0.481277015123422
BPIFB1	turquoise	0.858034836413385	5.03903909465971e-14	0.468971665070078	0.00115602918814581
RPL36AL	purple	0.985585911572769	8.07669689424431e-35	-0.167156	0.272419240436026
S100P	purple	0.86785962165612	1.19477780167887e-14	-0.0506768	0.740948999860572
CCL2	purple	0.866617566300509	1.44217854996009e-14	-0.000813422	0.995768798762375
RPL32	purple	0.977076375175132	1.59547659643268e-30	-0.129623	0.396071742177013
COX6A1	green	-0.97426	1.87461931251801e-29	-0.109356	0.474553282355239
RPS4Y1	green	0.106674995065778	0.485518312522927	0.190745852231374	0.209436463600639
RPS6	purple	0.972608909412325	7.01738034758136e-29	-0.115118	0.451443261951553
DLG2	green	0.968852657398179	1.0713482202615e-27	0.0625740463540878	0.683018241777821
PTPRG	green	0.975538397949432	6.34762063877648e-30	0.14418026525794	0.344697990795722
KALRN	blue	0.964071988421936	2.20059114975544e-26	0.203428505009204	0.180146983001932
HIGD2A	purple	0.964939615221059	1.31230933905972e-26	-0.157235	0.302299288874108
RPL26	purple	0.972855063736127	5.79354839314216e-29	-0.119603	0.433885497227506
FAM155A	green	0.912667649259827	2.57613363102483e-18	0.342098965213581	0.0214381808720854
SAP18	purple	0.96712171471943	3.36863113159202e-27	-0.142378	0.35082696269148
COX7C	purple	0.973828408389284	2.66792945632704e-29	-0.126432	0.407898816602488
RPS15	purple	0.984639358298704	3.14091767164204e-34	-0.12226	0.423669699790125
MUC5B	turquoise	0.89024738388807	2.78451076959212e-16	0.603089312946545	1.16208713253298e-05
KHDRBS2	green	0.946074413026115	1.13801795330917e-22	0.0583396223790147	0.703451234334918
EVI2A	green	-0.943684	2.82266529174244e-22	-0.247945	0.10054450872432
EIF1AY	green	-0.514802	0.000296688901747739	-0.0396945	0.795721803780112
KRT5	black	0.853518642094623	9.42311883303815e-14	0.31514833586495	0.0349746123698584
ZNF385B	greenyellow	0.850285340906895	1.4564842510022e-13	-0.268933	0.0740405170985552
HBB	purple	0.459159510436095	0.00151049658786199	-0.504358	0.000411401974816802
RPS27	purple	0.981892825178683	1.05019989171181e-32	-0.19042	0.21023109372261
MT1A	purple	0.756183499512752	1.8932247542235e-09	-0.0931442	0.542807649432642
SLC25A5	purple	0.962521984233659	5.37299576189179e-26	-0.194835	0.199651742987151
LUM	purple	0.856475791714547	6.26954386134718e-14	0.0795027306068014	0.603666064348714
NRG3	green	0.950236224837681	2.11022900086745e-23	0.0793978804034594	0.60414507106338
GPC5	green	0.942892339959375	3.78093352001145e-22	0.00246966454335484	0.987153955706025
FOLR1	purple	0.908540042716562	6.66595300842799e-18	-0.235975	0.118629277487767
ADGRL2	green	0.935219803311404	5.26143831329763e-21	0.125503521167421	0.411380158769397
RPL8	purple	0.981689307268649	1.3327899160264e-32	-0.152749	0.31647439214622
MT-ND5	green	-0.891202	2.33032440109854e-16	0.038656946377927	0.800951721030632
MECOM	blue	0.968021120247522	1.87218981564135e-27	0.196046326697159	0.196815381470404
CXCL10	purple	0.751932938726548	2.61953953293492e-09	0.133935153110963	0.380409087631853
SFTPC	greenyellow	0.728915064138159	1.36695775797003e-08	-0.249006	0.0990502237800512
RPS3	green	-0.985425	1.02359813314679e-34	-0.149526	0.326912595108668
COX6B1	purple	0.979818701909869	1.05922143798914e-31	-0.123336	0.419567677259374
NDUFA1	purple	0.976459977606109	2.8054154688694e-30	-0.137146	0.368987828855508
RPS3A	green	-0.984718	2.81361603420962e-34	-0.139463	0.360875574837684
SOX5	green	0.95637751998268	1.32178399078784e-24	0.171407644571797	0.26023428587485
PRDX1	purple	0.97724259111759	1.36664163571596e-30	-0.16477	0.279422151310673
ISG15	purple	0.942428187964145	4.47873492738545e-22	-0.021322	0.889432050206282
SORBS1	green	0.933507537530964	9.06136272864569e-21	0.061576931432629	0.687810290274368
S100A6	purple	0.959428650961899	2.86642181642227e-25	-0.131026	0.390935777284588
SDF2L1	purple	0.951892255023027	1.03638622820615e-23	-0.108437	0.4782996953324
PLCB1	green	0.945886587089883	1.22404062318676e-22	0.290726976103372	0.0526900366694018
CYCS	green	-0.972465	7.84114041906072e-29	-0.22295	0.140991184405909
RPL9	purple	0.982294900229769	6.50611358263789e-33	-0.129909	0.395021656167735
NDUFB3	green	-0.974592	1.42173481999448e-29	-0.109011	0.475959246108841
RPLP2	purple	0.98042615639952	5.52363949393132e-32	-0.119707	0.433485258686702
MT1X	purple	0.849090194168952	1.70643489013056e-13	-0.192039	0.206307300051009
RPS29	purple	0.983085662018717	2.45515934770036e-33	-0.108669	0.477353179366062
RBMS3	blue	0.98236302226614	5.99264051938703e-33	0.141566139258919	0.35360760947507
PARD3B	magenta	0.968218339112492	1.64224564930522e-27	0.0947313348515338	0.535923476885794
CHCHD2	purple	0.977410032728457	1.16793681077571e-30	-0.149808	0.325991256204566
LINC00472	green	0.954007578120463	4.02578385237997e-24	0.117356155865603	0.442633132173056
SH3RF3	green	0.956066136455988	1.53540616452057e-24	0.26178628637787	0.0823631062543563
PMAIP1	purple	0.897632107003575	6.71992157676247e-17	-0.0891573	0.560285695684568
MT-ND3	green	-0.799276	4.62540061298569e-11	0.115656480437768	0.449314102093262
KRT10	purple	0.947311669552253	6.99542817280102e-23	-0.0492066	0.748215275713307
LTB	purple	0.91812364701847	6.80383251374082e-19	-0.0421297	0.783482156986197
CXCL8	purple	0.789774993087783	1.12826554227225e-10	-0.172778	0.256385349352567
IGHG1	purple	0.77250131615007	5.10664592782335e-10	0.179070249349305	0.239203760839699
GALNT18	green	0.96667748350221	4.47559001030836e-27	0.115989105586844	0.448002316861878
RPL13	purple	0.987910129913732	1.88504399962653e-36	-0.1312	0.390302622357419
PTP4A1	green	-0.891927	2.03376800150125e-16	0.0501202203281831	0.74369734423881
RPL38	purple	0.981101713827247	2.61318485529576e-32	-0.0964609	0.528469985339575
PTPRM	magenta	0.98836236777691	8.34218997915183e-37	0.110755252942676	0.468884993215897
RPL30	purple	0.975929613640836	4.50561780012642e-30	-0.124156	0.41646163105233
BTBD9	magenta	0.972352482428253	8.55218146380016e-29	0.121294335377469	0.427365812344999
CADPS2	magenta	0.961142213870402	1.15298668381611e-25	0.147190408857674	0.334611464715974
VMO1	green	-0.927394	5.64522424109325e-20	-0.0230541	0.880512364384855
RPL24	purple	0.975917444616318	4.55429749192114e-30	-0.131088	0.390710585923321
MRPL23	purple	0.940806859917637	8.00554575898776e-22	-0.189176	0.213280585721561
TSPAN19	purple	0.761941436969186	1.20657234740441e-09	0.207705353531624	0.170966177956985
ARL15	green	0.95353534544712	4.99093069343657e-24	0.20872824283962	0.168821424127457
RPL23	purple	0.981257187909565	2.19130245995915e-32	-0.123844	0.417640386459251
SHANK3	green	0.975823009791745	4.94946252566725e-30	0.179156001262221	0.238975154395188
RPL11	purple	0.979307136974999	1.80520724856552e-31	-0.129924	0.394966091203063
SRP14	purple	0.968475201665423	1.38284968968031e-27	-0.1055	0.490366263154011
GADD45GIP1	purple	0.98494083505816	2.05714958621238e-34	-0.0971155	0.5256625539205
ROS1	green	0.916556816541633	1.00652059680475e-18	-0.0644413	0.674077467526354
CELF2	green	0.955464458080822	2.04464938358541e-24	-0.00972928	0.949423402493345
TRMT112	purple	0.979488032548469	1.49733405969522e-31	-0.130379	0.393300752770157
SF3B5	purple	0.984276551529774	5.1698592400583e-34	-0.116744	0.445033638481371
HSPA1B	purple	0.696013946037497	1.10764598892059e-07	-0.0567107	0.711367706170427
PDE4D	blue	0.960431030997971	1.69080055004125e-25	0.0867448387422472	0.570987994580993
IGHM	purple	0.773237457228247	4.80137049163781e-10	0.121954517100067	0.424835751647296
GAPDH	purple	0.979122318958959	2.18152081587587e-31	-0.126605	0.407253460110486
RPL18	purple	0.981604265356481	1.47116930402529e-32	-0.144459	0.343755274516988
MS4A8	black	0.924037160464927	1.4416811435438e-19	0.224561209183983	0.138067283329481
SNTN	purple	0.802441356465218	3.40061678306872e-11	0.167694063895029	0.270857432553916
POLR2K	purple	0.952018430448287	9.80728087329746e-24	-0.148138	0.331475946834173
GPR183	green	-0.930114	2.55325007370774e-20	-0.197094	0.194386759092634
MAGI2	blue	0.974548146725915	1.47533963912754e-29	0.149844936558064	0.325870502507022
RPS16	purple	0.979197636682765	2.01993240442092e-31	-0.122783	0.421673849539717
MAGI3	green	0.942422693738411	4.48768534244119e-22	0.0858020337881803	0.575195811593828
DUSP1	green	0.955343202842585	2.16511091915044e-24	0.0439319123802671	0.774457251490854
TUBB2A	purple	0.937090483136974	2.85558092562951e-21	-0.0708997	0.64350138210254
WWOX	magenta	0.974866424395018	1.1291753557115e-29	0.157575931928256	0.301238118663646
PSENEN	purple	0.977733096615842	8.59624220027819e-31	-0.0512678	0.738034598344933
RTN4	green	0.97439022021664	1.68256011700167e-29	0.0771510945137116	0.614448756891854
LAMTOR2	purple	0.969277539735931	8.00785682183916e-28	-0.0669501	0.662134811737531
RPL31	purple	0.978615693725194	3.63463453913883e-31	-0.120917	0.428813992235943
THSD4	blue	0.952654099182203	7.40940843199289e-24	0.160956731009213	0.290852721134635
TTN	green	0.873716803149245	4.79105391802012e-15	-0.196067	0.196767218679251
RPL10	purple	0.985476022547178	9.49901302250697e-35	-0.147031	0.335142593534145
MRPL51	purple	0.971634695957126	1.47335324445577e-28	-0.0801206	0.600846478753361
COMMD6	purple	0.969213517749958	8.36908010937309e-28	-0.0474325	0.757011554116508
DYNLRB1	purple	0.98374631843452	1.04928007624679e-33	-0.0973223	0.524777325819619
HECW2	brown	0.870997217924384	7.36370599122317e-15	0.0928969069983098	0.543884067095467
MUC16	turquoise	0.887254312232215	4.81463612861414e-16	0.453323297663126	0.00176441010508753
SNTG2	yellow	0.933499431145565	9.08439972156765e-21	0.324693817078836	0.0295432837827905
CARD16	purple	0.889332525166088	3.29731808071264e-16	-0.0403993	0.792174469073707
EEF1A1	green	-0.970178	4.26282144225106e-28	-0.123731	0.418069235822253
ZFPM2	blue	0.968139549719099	1.73068244728153e-27	0.209525168534746	0.167164007803203
MRPL54	purple	0.969711761695154	5.92211778708431e-28	-0.101235	0.508165360685197
BCL2A1	purple	0.936321504029519	3.67933545060967e-21	-0.237054	0.116904096664185
PARD3	blue	0.964244288989244	1.98791408039198e-26	0.116000290654908	0.4479582424321
SDS	green	-0.778712	3.0137739875628e-10	0.0476873106728287	0.755746419829229
RPL3	purple	0.977118778085431	1.53385754192077e-30	-0.117871	0.440621140071407
NDUFB11	purple	0.97409024348994	2.15484137890226e-29	-0.141227	0.354774301934188
UBC	green	0.947123094272278	7.53965686967931e-23	0.100203427891041	0.512518576091345
LDB2	green	0.968418621413552	1.43639621909525e-27	0.221825411168453	0.143059630693137
RPL28	purple	0.982402747251317	5.71128382650408e-33	-0.0941054	0.538633164823933
BTF3	purple	0.977473179984654	1.10040598628313e-30	-0.127177	0.405121817846478
UQCR10	purple	0.975505034558647	6.53422408656629e-30	-0.115865	0.448492770634333
ZFY	green	-0.0452347	0.767951195726704	0.202738338152967	0.181660998351988
PLEKHG1	green	0.943520227489329	2.99992632607294e-22	0.239801550398238	0.11259904219664
RPL14	purple	0.98080998053021	3.62207656556121e-32	-0.158107	0.299590575182574
LCN2	purple	0.76081272967509	1.31927176167087e-09	0.0900888784598521	0.556178444916723
SDK1	green	0.937989155079865	2.11486529810714e-21	0.111209138120657	0.467053710466742
CD48	purple	0.925565211310063	9.45928876531616e-20	-0.0770641	0.614849350314571
S100A2	black	0.845079996705315	2.87499392234894e-13	0.285796231755143	0.0570227831976403
RGS2	green	-0.935886	4.24117485791393e-21	-0.197624	0.193164553027195
CLEC4E	purple	0.846509481314492	2.3912240501165e-13	-0.393152	0.00754777144906986
RAC2	purple	0.951320674756397	1.32837427634868e-23	-0.158077	0.299685563039063
RPL35	purple	0.984865067969153	2.28982561105392e-34	-0.13054	0.392708666398554
RPL37A	purple	0.974835485398393	1.15908497078633e-29	-0.101555	0.506819298110001
TPT1	purple	0.973408752412855	3.74026033589335e-29	-0.097979	0.521970180839085
RPL10A	purple	0.989858729399641	4.39110241538027e-38	-0.135547	0.374651152334506
UBB	green	-0.943942	2.56442210833827e-22	-0.0826781	0.589238205414022
MT-ND6	green	-0.866211	1.53312435708563e-14	0.0800485421035814	0.601175196345543
C9orf24	green	-0.926362	7.56582325992119e-20	-0.0325114	0.832097736633076
ANXA2	green	0.981242678282586	2.22774618973916e-32	0.132129758808948	0.386921580762687
ANKRD1	greenyellow	0.170885236645098	0.261711638068917	-0.499462	0.000477824725412203
NRXN3	green	0.959570709957608	2.66197600789885e-25	0.172963872136215	0.255866369057654
CSMD1	green	0.91044980214508	4.31818590619081e-18	0.0674467937174553	0.659780091719497
RPS9	purple	0.983207134430199	2.10523832580382e-33	-0.175027	0.250150885117893
FN1	green	0.961570168916594	9.12581363560968e-26	0.0943555199458997	0.537549722929162
PIFO	green	-0.914044	1.85682879569623e-18	-0.0635862	0.678166433610792
TTC28	magenta	0.968304978050853	1.54996949338963e-27	0.255811991503302	0.0898668932202391
RAD51B	blue	0.958261284731066	5.21375934197345e-25	0.190376915752796	0.21033551243639
NR3C2	magenta	0.976533872974733	2.62396278758512e-30	0.107538593482716	0.481972332506305
AUTS2	green	0.957909242307157	6.22370479310854e-25	0.070563937131922	0.645077116206461
RPL6	purple	0.98194139491256	9.91746508776572e-33	-0.127979	0.40214259535391
LAMTOR5	green	-0.982294	6.51582464185795e-33	-0.195105	0.199015908349888
RPS7	purple	0.981249415024081	2.21075433236052e-32	-0.12972	0.395713837641503
CCSER1	green	0.955057973351247	2.47565813729894e-24	0.142615700973361	0.350013699458364
PDE10A	green	0.931727004415935	1.57081142047725e-20	0.277969082824668	0.0644832421959363
MFAP4	green	-0.846954	2.25731395574636e-13	0.0386563001141003	0.800954981238799
COX7B	purple	0.980761074328887	3.82396469795956e-32	-0.153601	0.313749838370891
KIAA1217	blue	0.945100180989122	1.65608913328921e-22	0.184016908212065	0.22625892838759
SOD1	purple	0.977603859413261	9.72278010587544e-31	-0.0849531	0.578996647312937
RPS28	purple	0.985367895323972	1.11294054065862e-34	-0.111195	0.467109837351631
TOMM22	purple	0.959986507050976	2.14031925985636e-25	-0.0925461	0.545412923725831
ANAPC11	purple	0.978045450185819	6.36417643986627e-31	-0.125103	0.412885084651432
PRELID1	purple	0.970631145946495	3.08050062867855e-28	-0.13567	0.374213316405073
ACOXL	green	0.872270563693549	6.0287425454047e-15	-0.14707	0.335012477350948
PREX2	green	0.958397169691811	4.86734306781404e-25	0.252646582037202	0.0940522191532854
TXNDC17	purple	0.965323499239421	1.03966954535791e-26	-0.138976	0.362571445229613
GPHN	blue	0.965026081869404	1.24552848021601e-26	0.0580002491661603	0.705098070424556
SNRPD2	purple	0.977060122411783	1.61971407311999e-30	-0.129567	0.396277382543055
CHST9	turquoise	0.85207306842157	1.1462981895778e-13	0.511243659043138	0.000332034874624366
RGS10	green	-0.974154	2.0450710727309e-29	-0.106417	0.486582076214898
DOCK4	magenta	0.979119724618619	2.18730043554867e-31	0.113047856606456	0.459674366035237
C19orf53	purple	0.986244203684736	2.97557630157855e-35	-0.0963658	0.528878797862382
TFF3	purple	0.867478607007403	1.2660378734876e-14	0.1188732140135	0.43671656939694
STARD13	green	0.950533221770674	1.86092518896525e-23	0.169588302974449	0.265403453669134
ZNF385D	yellow	0.927129324942734	6.08759783284483e-20	0.464498900702979	0.00130719436736997
SEC61G	purple	0.980377812930337	5.82171213047415e-32	-0.126543	0.407484098971748
RALGAPA2	blue	0.971834355083121	1.26826746092731e-28	0.188123067225556	0.215886349317802
NXN	green	0.956384593069858	1.31727691505728e-24	0.22149073549809	0.143679408064157
HSPE1	green	-0.932018	1.43724388880765e-20	-0.085401	0.576990125099773
TMEM160	purple	0.966654343138719	4.54184455636079e-27	-0.141871	0.352561042518066
TOMM7	purple	0.974419412228099	1.64227830203473e-29	-0.0891891	0.560145424453008
TSTD1	purple	0.909450351483157	5.42627625495652e-18	-0.159503	0.295290127158362
RPS25	purple	0.984448521821456	4.08816857858081e-34	-0.17236	0.257554554601396
AGAP1	magenta	0.979705455888576	1.19330068969584e-31	0.246522530628892	0.102575710590055
PRICKLE2	green	0.927664223604245	5.22404783055715e-20	0.191242066082594	0.208231495228659
TACSTD2	purple	0.832715407658227	1.31479691408171e-12	-0.0683796	0.655366468033475
OST4	purple	0.977741953186403	8.52377703061146e-31	-0.100913	0.509523152139603
UQCRQ	purple	0.983026649907521	2.64451989852703e-33	-0.156205	0.305516874517325
PTPRE	magenta	0.923735111781826	1.56528025828673e-19	0.0446673715905976	0.770782577936457
CCDC85A	green	0.942972260074094	3.6717382714029e-22	0.00377826350872047	0.980348331493859
EVI2B	purple	0.927203686993147	5.95991258431928e-20	-0.260086	0.0844465766607217
RPL41	green	-0.977672	9.11568369642021e-31	-0.123158	0.420244877747924
TSPAN1	green	-0.860649	3.47263458815079e-14	0.0259274630498493	0.865748897115233
ADAMTS9-AS2	green	0.966532414484016	4.90665254388201e-27	0.131613653134328	0.388795284713918
CCL23	purple	0.860324154742161	3.63877366298578e-14	-0.116284	0.446839613923292
HLA-B	green	0.964188201048407	2.05489913979401e-26	0.113865699874607	0.456412459106941
NDUFA6	purple	0.962234768367911	6.3133218398787e-26	-0.181274	0.233376031211539
TANC1	magenta	0.971401520174562	1.75285205332512e-28	0.197434444410668	0.193600816379416
EXOC6B	magenta	0.975086486222353	9.36684932383413e-30	0.0885937021201762	0.562777668512918
PRDX5	green	-0.965934	7.1390731559293e-27	-0.168072	0.269764646042825
RPSA	purple	0.981793908884754	1.17955187724569e-32	-0.157374	0.301864507339385
COX4I1	purple	0.978202225353522	5.46386201528052e-31	-0.169658	0.265204393681956
DOCK9	green	0.970206966449806	4.17530524783828e-28	0.209590016216027	0.167029660770384
RANBP17	green	0.96169729024458	8.50910791503592e-26	0.0183809724061538	0.904607068413617
TCEAL8	purple	0.961595464357995	8.99980384722808e-26	-0.137113	0.36910377820077
ALCAM	blue	0.924027088107622	1.44564892703224e-19	-0.0303573	0.843077875022987
STOX2	green	0.97946396942753	1.53519242523336e-31	0.105999190417177	0.488302671661726
SPCS1	purple	0.975934389090189	4.48665032519879e-30	-0.108083	0.479743674459697
PKHD1L1	green	0.951129662669425	1.44230227178978e-23	0.14823667205952	0.331149028180429
ARGLU1	green	0.94163835697331	5.95569714434593e-22	0.0161928863432501	0.915919330911616
RPL36	purple	0.983795772816324	9.83217863290002e-34	-0.110372	0.470432825343884
RPS8	purple	0.980374268363665	5.84415953125635e-32	-0.11692	0.444341469359232
SMAD6	green	0.902273277653802	2.59907769680867e-17	0.118202625191768	0.439326444942884
TNFAIP6	purple	0.844253915812407	3.19530299913571e-13	-0.10119	0.508356170746171
GSTP1	purple	0.975063928656818	9.548760314927e-30	-0.169194	0.26653356435057
CLIC1	purple	0.970493720237332	3.40109694224769e-28	-0.147053	0.335069479023859
EGR2	purple	0.88558343410759	6.49276143376059e-16	0.0685323632550377	0.654644907393446
ANK3	green	0.901128003989088	3.29995080452897e-17	-0.0111111	0.94225159170728
VAMP8	green	-0.964571	1.63716887801555e-26	-0.177402	0.243681379738119
TIMM10	purple	0.96385361612553	2.50135806079316e-26	-0.162997	0.284697648805107
RPAP2	green	0.908739171194141	6.37374462333161e-18	0.0802929319207568	0.600061350661462
POLR2J	green	-0.953502	5.06666472830881e-24	-0.101191	0.50835163042049
CTNNB1	blue	0.963469413163604	3.12778880172115e-26	0.139740652493277	0.359911809576726
FCN1	purple	0.832785529347902	1.30396757217424e-12	-0.320067	0.032081149760004
NAV3	green	0.96217237325953	6.53735541128814e-26	0.172057960272092	0.258403007464871
RPS11	purple	0.987521994855381	3.70439203519999e-36	-0.11849	0.438208757403675
PHACTR1	green	0.952951008852141	6.49134899060358e-24	-0.0231777	0.879876486259637
SUPT4H1	purple	0.964794473894454	1.43213241925076e-26	-0.0962798	0.529248229411345
NACA	purple	0.980165313301404	7.32342308526354e-32	-0.124596	0.41479578158676
C4orf3	green	-0.968782	1.12433925671057e-27	-0.0606497	0.692277421685085
ERBB4	blue	0.925913050776776	8.58329129402983e-20	0.00331552638036636	0.982754753176693
DNPH1	purple	0.968321134785602	1.53331686843717e-27	-0.101145	0.508543460686394
MT-ND4L	green	-0.700129	8.65811585385249e-08	0.107698274793636	0.481318164469391
RAPGEF4	green	0.970070112804951	4.60140681409415e-28	0.204182027991253	0.178504333464812
RPL7A	purple	0.980619746792057	4.4693862175277e-32	-0.137193	0.368824362851285
MAML3	blue	0.952041037825133	9.71060867203312e-24	0.111397046290101	0.466296682141573
ATP13A4	green	0.88543609336366	6.66476056985559e-16	-0.0942323	0.538083250877094
NDUFC2	purple	0.969838614481758	5.41795775198661e-28	-0.111341	0.466523169535185
PLEKHS1	turquoise	0.854807452457745	7.89860544155915e-14	0.440489366030938	0.00245982317903101
UQCR11	purple	0.98372836621347	1.07429090160626e-33	-0.128082	0.401758605789056
EEF1B2	purple	0.980515805418992	5.0089478803741e-32	-0.110574	0.469618475157293
PKP4	green	0.954452783753773	3.2806458172896e-24	0.240620035406089	0.111340036041042
SOCS1	purple	0.926239406539187	7.83192595041221e-20	-0.209699	0.166804310655802
RSPH1	purple	0.843534645192674	3.50138885475399e-13	0.0890455310732454	0.56077960352382
DDT	purple	0.968538309657343	1.32536854779712e-27	-0.170218	0.263606553537769
DACH1	green	0.945009603792585	1.71427736853875e-22	0.158529045847464	0.298286459368898
AQP5	black	0.907201230789317	8.98685814821885e-18	0.370424627711704	0.0122530816618811
ABRACL	purple	0.953149403255333	5.9393768195197e-24	-0.101459	0.507222208482937
COX5B	purple	0.980886721032915	3.32561744568379e-32	-0.0926941	0.544767744958036
HP	purple	0.803970986200568	2.92501510514592e-11	-0.0667471	0.663098319508659
NAALADL2	green	0.963412922186578	3.23162637148927e-26	0.164890626054411	0.279064273701105
GNA14	green	0.960710113974656	1.45616676585748e-25	0.215067323488055	0.155962728638226
C22orf34	green	0.93378338842136	8.30971690965558e-21	0.203440431119236	0.180120900486945
DNAH17	green	0.90747848121802	8.45086196826841e-18	0.10286010172122	0.501344038030182
TMTC1	green	0.942135161365909	4.98057251736874e-22	0.174948128697102	0.250368738605653
RNF5	green	-0.968593	1.27721120517074e-27	-0.0841924	0.582412132503084
MARCKSL1	purple	0.865976869296238	1.58803641685784e-14	0.150346785598443	0.324234234968869
NFKBIA	green	0.961850473291515	7.81861503592893e-26	0.00669453135433881	0.965187377435578
MYRIP	green	0.888343737472939	3.9517174142876e-16	0.313332161364248	0.0360957901767507
EXT1	blue	0.964573556984699	1.63469701067586e-26	0.163479403640653	0.283256593240703
FNDC3B	green	0.956514260406928	1.23719718713403e-24	0.0426698675887539	0.78077430638037
SAMD12	blue	0.960972352586438	1.26420201340304e-25	0.171826509722236	0.259053778165313
PTGER2	purple	0.923463238906911	1.68508069578576e-19	-0.237908	0.115552707441992
DANT2	green	0.959776561398184	2.39019027768334e-25	0.0186158080743203	0.903394052457589
TRBC2	purple	0.871012470992575	7.3461753721042e-15	-0.0454477	0.766889242825121
PCAT1	green	0.973444482367038	3.63497083316473e-29	0.13231522146526	0.38624956500884
CKS2	purple	0.908449141737297	6.80353046650206e-18	-0.305452	0.0413081331634948
PCBD1	purple	0.960848832445581	1.35140926411564e-25	-0.145518	0.340191832411151
RPL22	purple	0.986551734463354	1.835561920002e-35	-0.109922	0.472257409511219
LAMA2	blue	0.893896992474081	1.39734935628576e-16	0.0734031172698843	0.631800556738193
PLCB4	green	0.925197924943305	1.04761357489739e-19	0.315841157184124	0.0345545409575598
NAV2	green	0.957272840072733	8.53905501675351e-25	0.0918945309662575	0.548257762052979
ADAMTS6	green	0.940014203142853	1.05713684124304e-21	0.251322501841851	0.095847001063738
TMEM258	purple	0.9755274357419	6.40836578542912e-30	-0.176498	0.246129957049598
PEBP1	purple	0.96699628947955	3.65144162801275e-27	-0.249504	0.098354340728235
CD44	green	0.953873297799935	4.28044251227475e-24	0.0348143757842821	0.820393597148497
IMMP2L	blue	0.958731533340912	4.10576490941041e-25	0.0870304581724182	0.569716047312748
UBL5	purple	0.978471190830194	4.19492379954594e-31	-0.1752	0.249676581738823
ROR1	greenyellow	0.923398504476486	1.71486314940459e-19	-0.0866258	0.571518406164267
COX6C	purple	0.977824998212246	7.87201883894978e-31	-0.120797	0.429277218720427
H3F3A	purple	0.966192716061318	6.07595468759103e-27	-0.122892	0.421256734963575
MCTP1	green	0.881269229630673	1.37608052194885e-15	0.37634098694261	0.0108352007669243
XKR6	brown	0.910084781341334	4.69532023126404e-18	0.124026255085881	0.41695112511556
TSHZ2	green	0.827291094007484	2.46495607477013e-12	0.488831951050988	0.000656275010739109
YBX1	purple	0.971140341032388	2.12572335554151e-28	-0.187951	0.216315297429127
RPL4	purple	0.978734850427151	3.22699314866768e-31	-0.122673	0.422092436679205
NDUFB2	purple	0.990942477255086	3.90769555708689e-39	-0.122195	0.423915536938384
TIMP1	purple	0.936397478066064	3.58885040099025e-21	-0.0556695	0.716443837986024
PTCHD4	yellow	0.811578762642764	1.35519269130556e-11	0.617562533816712	6.20967590073293e-06
NDUFA2	purple	0.970055808057582	4.6482617084126e-28	-0.111142	0.46732240727306
RGS1	purple	0.829628075438625	1.885319215239e-12	-0.125224	0.412429136150899
PSMB6	purple	0.978922710613055	2.67147298793874e-31	-0.15544	0.30792074236922
N4BP2L2	magenta	0.94618374237764	1.09062666870687e-22	0.0501477802349877	0.743561192851388
ACTG2	purple	0.682454394815809	2.4252257732551e-07	0.0812157610783638	0.595863556016725
RAPGEF5	green	0.95711644276532	9.22246326558411e-25	0.14576659507827	0.339359350965447
RPS21	purple	0.973682871485324	3.00142577182405e-29	-0.112802	0.460656859083638
DOCK1	magenta	0.972615540953573	6.98140267664762e-29	0.228517246996057	0.131078877291997
PRKCE	green	0.952116639570782	9.39386747536171e-24	0.0855195076915407	0.576459496500619
SMDT1	purple	0.974263083945037	1.86922929838976e-29	-0.135674	0.37419797343658
EMC6	purple	0.959177247099822	3.26536263206373e-25	-0.106506	0.486214663405732
ANKRD12	magenta	0.966234564566427	5.91874895909988e-27	0.137904742916106	0.3663201912386
RPS26	green	-0.940151	1.00785572690926e-21	-0.158706	0.297741418473761
TIMM8B	purple	0.969408783915726	7.31322054934887e-28	-0.0697086	0.649098697687178
UQCRH	purple	0.985279158820899	1.26633101633837e-34	-0.131488	0.389253612656139
ZBTB20	blue	0.976684555218332	2.28799337435029e-30	0.198821500927348	0.190426032599502
SMYD3	blue	0.939411503954358	1.3026929901041e-21	0.0554283049103116	0.717621519152105
MCL1	green	0.957390363564781	8.05752103301232e-25	0.0892638508169684	0.559815345015562
ANXA1	green	0.931199177281503	1.84381149521951e-20	0.0704801588044475	0.645470569113211
ATP6V1G1	purple	0.966182649979684	6.11435711032047e-27	-0.152232	0.318133712410647
MORN2	green	-0.946986	7.96074364102542e-23	-0.048587	0.751283959801452
BCAS3	blue	0.954639899571557	3.00838796760019e-24	0.187945951940096	0.216326824525056
SASH1	blue	0.953212893959098	5.77237563653548e-24	0.20039242357767	0.186875264844064
RPL37	purple	0.976060262886208	4.01325788482793e-30	-0.0970882	0.525779726607798
THBS1	green	0.899422711678934	4.68359314348883e-17	-0.0370009	0.809316560717742
AC019117.1	green	0.918377107345994	6.38151461210225e-19	0.103041668774348	0.5005849001056
CDK14	blue	0.965528744435787	9.16963228600557e-27	0.150060202754818	0.32516799872889
SOD2	green	0.950487907612635	1.89706082625109e-23	0.0698649420672286	0.648362773309037
VKORC1	purple	0.969876470191005	5.2756042007054e-28	-0.0768088	0.616025042104844
SFTPA1	greenyellow	0.763871401483608	1.03454128741864e-09	-0.236074	0.118470391221064
AGBL1	greenyellow	0.82165855252227	4.62830781822282e-12	-0.131626	0.388749541094316
RHOG	purple	0.963168836547894	3.71921210627209e-26	-0.161881	0.288054734244183
MBD5	magenta	0.960377897105009	1.7393705148288e-25	0.079382366806156	0.604215958699056
CSF3	purple	0.604517505793628	1.09389165549371e-05	-0.118668	0.437516
TEKT1	black	0.886390077426606	5.62325213221262e-16	0.224639950409752	0.137925537482101
MRPL36	purple	0.955144890076997	2.3767993362921e-24	-0.0955253	0.532495797250376
RAN	purple	0.984953942077188	2.01925681883746e-34	-0.146829	0.335811180945556
PITPNM2	green	0.976221310717322	3.47666782340364e-30	0.076202744535297	0.618820142528612
EPB41L4A	green	0.963250232002329	3.54931988442919e-26	0.170338916931005	0.263262581523825
RPLP0	purple	0.97845269495595	4.27231315602553e-31	-0.169809	0.264772568446157
RPL15	green	-0.974057	2.21374505755666e-29	-0.127527	0.403818705131412
HSPA8	purple	0.954496001595483	3.21575603009523e-24	-0.0354357	0.817242334626219
ZNF407	blue	0.969568279732054	6.54616004251312e-28	0.113135874742962	0.459322708862286
TEAD1	magenta	0.966263597956923	5.81196717521936e-27	0.188547009809928	0.214834560560388
TIMM13	purple	0.987903183725254	1.90833654537368e-36	-0.123528	0.418839104698729
THY1	purple	0.685197680646482	2.07660969310885e-07	0.433353720460219	0.0029428886077756
SAA2	purple	0.638323835717083	2.38793590373816e-06	0.104941782206966	0.492675870228084
ZEB2	green	0.946926122786147	8.15099625587974e-23	0.0561671892308622	0.714016033345844
IGF1R	blue	0.937404554613121	2.57239257423414e-21	0.183549728511281	0.22746043470715
COBLL1	green	0.937147082211946	2.8024500710002e-21	0.121586660713899	0.426244470570398
NDUFAF3	purple	0.969756177814578	5.74071352442706e-28	-0.105249	0.491404364046116
NXT1	purple	0.958770713320427	4.02434260778588e-25	-0.121785	0.425486396154579
SLC4A4	blue	0.903570431308391	1.97618070989631e-17	0.289516279242462	0.0537284908708515
ORMDL2	purple	0.968561525667885	1.30480067229215e-27	-0.150719	0.323023765238974
TMEM147	purple	0.985427175076255	1.02051690517123e-34	-0.140728	0.356492536650908
SERTAD1	purple	0.953399131645366	5.30789562974361e-24	-0.076455	0.617656114558734
GPR65	purple	0.8921096501693	1.96467803282934e-16	-0.194962	0.199352588572065
DLEU2	green	0.951438323651919	1.26252038170778e-23	0.217135181171717	0.151927369381519
FCHSD2	green	0.955332775249507	2.17577973674555e-24	0.144178286755582	0.344704681349762
MDK	purple	0.792639346855603	8.66519308223431e-11	0.422394575147134	0.00384755951275811
TRAPPC9	magenta	0.972401429874894	8.23649103163697e-29	0.175050378381246	0.250087615762774
COX14	purple	0.978474205857152	4.18243577109243e-31	-0.103087	0.500393636078107
GLIS3	green	0.923799238151918	1.53822643469596e-19	0.290531455840916	0.0528566365136225
IL2RG	purple	0.903974766480208	1.81297362356971e-17	-0.106449	0.486449656768097
DNM3	green	0.972566238193549	7.2531396663093e-29	0.203604381103358	0.179762614623916
SHROOM4	green	0.961315584380502	1.04911193348109e-25	0.19814137458719	0.191978096999048
BRK1	purple	0.974932353325314	1.06787341651723e-29	-0.10698	0.484262860095018
CACNA1C	green	0.933764467065529	8.35932056520733e-21	0.199007571051231	0.190002973254455
TSC22D3	green	0.938119576520432	2.02392633491831e-21	0.0100437289344095	0.947791016641966
UNC13B	green	0.960769853240195	1.41013895150628e-25	0.00864223989153863	0.955068154646162
L3MBTL4	magenta	0.957969635371579	6.03814906598796e-25	0.0897254571429633	0.557779113915346
CORO1A	purple	0.912164788710469	2.89968131659322e-18	-0.181427	0.232973705718805
DNAJB1	purple	0.868885266052628	1.02134423319814e-14	-0.117214	0.443191707538407
STMN1	green	-0.974299	1.81400394918228e-29	-0.135045	0.376436438619608
HSD17B10	purple	0.973727032961091	2.89625018096846e-29	-0.121629	0.426083841861275
SELE	green	-0.1942	0.201148285779962	0.435115769320629	0.00281642985800058
IFI27L2	green	-0.969843	5.40026140241101e-28	-0.153343	0.314574121848337
RPS27L	green	-0.968119	1.75411415695693e-27	-0.0323201	0.833071472270967
ARPC2	green	0.988958872231152	2.70726050272874e-37	0.0836747985902902	0.584741403483156
FHIT	green	0.932104958196708	1.39942360146328e-20	0.027181135917175	0.859321241191517
SLC2A3	green	0.899386087384233	4.7186236507346e-17	0.0212973754966159	0.889558817585508
CCDC78	green	-0.800978	3.92314783913209e-11	0.115102098807056	0.45150509861857
APBB2	magenta	0.971292529120379	1.90017298184155e-28	0.188086286252747	0.21597777012184
NLGN4Y	green	0.258943740866817	0.0858698285836546	0.322007158795992	0.0309959828498264
THSD7A	green	0.932876248512029	1.10320240442079e-20	0.229328443721692	0.129679171894759
RYR2	green	0.958142019970699	5.53702290640627e-25	0.135866859898599	0.373513399281658
PTPRK	green	0.965143909260667	1.15971793116272e-26	0.148002607187507	0.331921679764203
RPA3	purple	0.958680797457026	4.21353358799937e-25	-0.12215	0.424087893654065
MPC2	green	-0.966772	4.21342687882764e-27	-0.0320439	0.834478263861919
CHIT1	green	-0.676228	3.42835732720563e-07	0.335226326327372	0.024381684124601
NDUFB10	purple	0.979210991488587	1.99249774636314e-31	-0.0889088	0.561383753631293
LSM3	purple	0.979187634242605	2.0407156113037e-31	-0.127318	0.404595544083681
TLL1	green	0.917867934898659	7.2567121322083e-19	0.303949923979304	0.042368060909555
NENF	purple	0.977331169811784	1.25782661391696e-30	-0.0890182	0.560900377532984
NME1	purple	0.966398389824241	5.33978790760525e-27	-0.0774174	0.613223707983695
GRK5	green	0.959751531234515	2.42176842664723e-25	0.0834596796598152	0.585710653529932
RNF13	blue	0.976102594466979	3.86503761656712e-30	0.0851828406159733	0.577966990867718
FENDRR	brown	0.797370965155122	5.55197546448401e-11	-0.0765344	0.617290031713878
ARHGDIB	green	-0.973528	3.40109609182575e-29	-0.0826227	0.589488613330512
BLOC1S4	purple	0.932535329319545	1.22592204356487e-20	-0.0561744	0.713980779352096
CALM3	purple	0.981968549701354	9.60430641429716e-33	-0.0962413	0.529413743682772
MZT2B	purple	0.986092904611168	3.75892262673799e-35	-0.0587422	0.701499566220132
SSR4	purple	0.984669247353287	3.01299298933968e-34	-0.145997	0.338589157581906
LSM10	purple	0.960008714036991	2.11539389333798e-25	-0.180759	0.234729960931415
MYL12A	purple	0.963457826848515	3.14882354698044e-26	-0.201398	0.18462721328838
TMTC2	green	0.962499818060493	5.4405329254967e-26	0.0976190415461104	0.523507945496949
PPP1R9A	green	0.94288212611209	3.7951092501064e-22	0.00864859527534212	0.955035146140409
POLR2L	purple	0.983648947092672	1.19191316966926e-33	-0.119316	0.434996316299466
MCC	blue	0.950416759140434	1.9551478988378e-23	0.20683156670517	0.172813830607504
CCDC85B	purple	0.891585129996809	2.1688450659393e-16	0.0235852624448135	0.877780168378812
CHSY3	blue	0.96104457685913	1.21572035141189e-25	0.145872943336728	0.33900328588788
DCTN3	purple	0.98554658360683	8.5606556989676e-35	-0.140919	0.355835145599576
TEK	green	0.941057549194096	7.32585634542136e-22	0.103618551013971	0.498176843249383
ROBO2	blue	0.920379513143464	3.81807213656533e-19	0.137945832408966	0.366176018632593
RASGRF2	green	0.897494950234047	6.90644032340757e-17	0.324215270604153	0.0297978219219964
TAOK1	green	0.927823943490929	4.9896474025274e-20	0.119091293422047	0.435869682857438
TMEM163	green	0.900340091558206	3.88249451704107e-17	-0.0514029	0.737368805269785
AKT3	green	0.958906181720221	3.75449723266443e-25	0.20826434213266	0.169791686898259
RPL5	purple	0.973415701075959	3.71955907511081e-29	-0.126083	0.409208384733118
ADGRV1	green	0.935499386611548	4.80777424008535e-21	-0.0379462	0.804539383109055
ARHGAP26	green	0.944822675593336	1.84056777815776e-22	0.18140767588881	0.233025562652021
NDUFB7	purple	0.97827146122329	5.1061316384272e-31	-0.127627	0.403447792405761
POLR2I	purple	0.985936135345837	4.77594694761073e-35	-0.118671	0.43750448199512
SLC25A6	purple	0.989686052277619	6.30210323027221e-38	-0.157435	0.301675306765483
TMSB10	purple	0.966969239345089	3.71532966645212e-27	-0.0956913	0.531780190796203
BMP6	green	0.89881890296783	5.2938894298948e-17	0.274401207941437	0.0681322601018096
SNX25	green	0.892009714789994	2.00211528872617e-16	-0.0933151	0.542064126436594
ZNF331	green	0.919870356446781	4.3562852973664e-19	0.0672136384189935	0.660885041116521
HMGA1	green	-0.908435	6.82553145687476e-18	-0.118268	0.439070978565464
TUBB	purple	0.965526804543995	9.18055602904277e-27	-0.0676029	0.659040660674756
VPS13B	magenta	0.963708650501029	2.72220875760399e-26	0.123836266705858	0.417670697078397
BTNL9	green	0.845559156509452	2.70336918328855e-13	-0.193395	0.203059639673583
TMEM108	green	0.933432717831965	9.27611324265509e-21	0.160000081850305	0.293767565904195
SPN	purple	0.890358449889589	2.72767390047542e-16	-0.179626	0.237724022689921
EFCAB1	black	0.904174263779563	1.73724109430914e-17	0.207940320958383	0.170471774929269
BANF1	purple	0.969303557834341	7.86534263681453e-28	-0.101138	0.508575295239595
C9orf16	purple	0.974478887855198	1.56303209828139e-29	-0.0566618	0.711605881579729
TUBB4B	purple	0.969650715285228	6.18036751028637e-28	-0.124483	0.415224569469549
SF3B6	purple	0.974936006351004	1.0645711614967e-29	-0.160222	0.293089744275464
TMA7	purple	0.982805477778611	3.48564614980989e-33	-0.106796	0.48501936349171
ERG	green	0.944397173994511	2.16184030231345e-22	0.258591931273091	0.0863118112333902
PTMA	purple	0.967481148204622	2.66910456535609e-27	-0.0869258	0.57018203883218
NEBL	green	0.889545664132173	3.17040891672773e-16	-0.140561	0.357069395708885
SLCO2A1	green	0.949267597654881	3.1630971776529e-23	0.236135288834647	0.118371744447327
PRKD1	blue	0.960113017094123	2.00197326339349e-25	0.112157135018887	0.463241217305527
SHANK2	green	0.937448374224595	2.53507204551161e-21	0.0392746619695123	0.797837067164768
APRT	purple	0.971968168042318	1.146359349775e-28	-0.155839	0.30666504348053
WDR83OS	purple	0.973691660255619	2.98020862715199e-29	-0.148171	0.331366337364885
ERN2	turquoise	0.9176235392301	7.71619022868369e-19	0.513899193698117	0.000305320561669636
HLA-A	green	0.951737819582844	1.10860429178373e-23	0.14135257606041	0.35434163785227
DYSF	green	0.958694310005949	4.18457134996474e-25	0.184058484525745	0.226152213297363
GLIPR1	purple	0.924888361504863	1.14129969653702e-19	-0.0916729	0.549226906718662
CAMKMT	magenta	0.963436461406609	3.18796569370495e-26	0.0533788003661549	0.727653942844503
SLC6A4	brown	0.571042619454468	4.19598475402437e-05	-0.216518	0.153124150713851
ZNF423	green	0.932532438290024	1.22701616379015e-20	0.235854098479956	0.118823565188598
DPYD	blue	0.960364600481644	1.75173113550998e-25	-0.0155817	0.919082076893009
CDC26	purple	0.954176382389931	3.72606502865189e-24	-0.152571	0.317046063957768
ZDHHC14	green	0.920617526540459	3.58872745534622e-19	0.207354120214486	0.171707150157703
PLP2	purple	0.964333949726945	1.88513182665385e-26	-0.183298	0.228110070529544
SUMO2	purple	0.977922720830198	7.16583189666283e-31	-0.0948824	0.535270386310486
PDE7B	yellow	0.935587365853301	4.672882057715e-21	0.365744974871626	0.0134841482450149
RPS24	green	-0.964035	2.24849409181023e-26	-0.0955295	0.532477439767194
LRRK2	green	0.82424290030263	3.47603124686412e-12	-0.152244	0.318095015026863
MAML2	blue	0.959046510881397	3.49317233875524e-25	0.227037306117434	0.133661555568204
VIPR1	brown	0.810368034558553	1.5352241652114e-11	-0.14256	0.350204753517329
C2CD4B	purple	0.513805941374161	0.000306224766200439	0.394841984450012	0.00727093724261188
RPS14	purple	0.974234572893277	1.91371787230301e-29	-0.136722	0.37048378896855
GTF3C6	purple	0.977032721790588	1.66137211019218e-30	-0.129277	0.397345802812763
BBS9	blue	0.962909637418275	4.31330989606603e-26	0.193663596506523	0.202420795284409
FUS	green	0.958461131230349	4.71197259285569e-25	0.117495729998407	0.442086949923322
CUTA	purple	0.98574616440601	6.36103921917141e-35	-0.13751	0.36770726516015
CFAP157	black	0.88899673068636	3.50707650305016e-16	0.218716380908076	0.148893838748688
GPCPD1	green	0.940042954911298	1.0465992526682e-21	0.119260245829414	0.435214203920374
DIP2C	green	0.965448354159353	9.63284707713555e-27	0.164876827378875	0.279105067317722
OMG	purple	0.903175387972415	2.14903083916953e-17	-0.0595134	0.697765958318419
NDUFS5	purple	0.973619173415203	3.15955662403373e-29	-0.132109	0.386995412939477
INVS	magenta	0.940756388547553	8.14945192631729e-22	0.0725032762298232	0.635996260921315
ERICH3	black	0.915551256647022	1.28891525814568e-18	0.239046799520339	0.1137695778084
HIGD1A	purple	0.956929225850967	1.01090387665685e-24	-0.0953226	0.53336973100726
SMIM22	purple	0.871397415848589	6.91661429429382e-15	0.0130655271267813	0.932115583613528
NLGN1	green	0.946774010760879	8.6550666558341e-23	0.0879339306561674	0.565701229433227
ST8SIA6	green	0.867978854501665	1.17326967693649e-14	0.187391598529694	0.217709500231332
PITPNC1	green	0.935596178483534	4.6595703085457e-21	0.248244151548676	0.100121832904451
NBEA	green	0.942001061083002	5.22765934090001e-22	0.154741779054907	0.310125542933726
HINT1	green	-0.978085	6.12753152449615e-31	-0.111211	0.467046043137775
ABLIM1	green	0.952877019456643	6.70943066970955e-24	0.289303336887397	0.053912831195594
LAMA3	green	0.869033103300364	9.98405333197207e-15	-0.113899	0.45628126988377
PIK3R3	green	0.946545780154791	9.46733435865164e-23	0.227389500191778	0.133043517884019
FAM160A1	green	0.92904987927266	3.49543414535878e-20	-0.0411668	0.788316248848808
CACHD1	green	0.938130415911026	2.01653805131495e-21	0.330159531156659	0.0267618638210581
COL4A2	green	0.933495605331325	9.0952913701522e-21	0.26287187084678	0.0810538110491928
PYURF	green	-0.965282	1.06644591319417e-26	-0.0576443	0.70682689151669
NHP2	purple	0.971442490452814	1.70033920489789e-28	-0.113314	0.458612117107327
S100A14	purple	0.871107896705181	7.23739467348089e-15	-0.267721	0.0754033743877473
ABCA3	green	0.769719932107444	6.43272058305318e-10	-0.186656	0.219554442161126
PDZD2	green	0.953665251623483	4.70548290415616e-24	0.0845656271378255	0.580735324299403
EFNA5	green	0.931868339491495	1.50450959701206e-20	0.279010318110459	0.0634481818474691
DNAJB9	purple	0.953400970534004	5.30349184571112e-24	-0.177949	0.242206279494459
HSBP1	purple	0.975456682605769	6.81395579628198e-30	-0.0740892	0.628609000649371
ELMO1	blue	0.960513152884551	1.61826339360424e-25	0.161722701222728	0.288532436665516
BMPR1B	yellow	0.862235418664078	2.76048177284298e-14	0.276302275534927	0.0661681006050196
CASC15	green	0.935610478384774	4.63804653418399e-21	0.301365798657074	0.044243671746136
SNED1	green	0.966462937701974	5.12682898426175e-27	0.237924911048145	0.115526552856781
NCF1	purple	0.818954636243509	6.21439694178943e-12	-0.345039	0.0202733764974898
BICD1	green	0.963676058087933	2.77435682283169e-26	0.207576896158704	0.171236907045355
ITGA9	green	0.963129926017926	3.80313609946602e-26	0.256731342546082	0.0886788318587858
AC007319.1	green	0.939436413676278	1.29155057655624e-21	0.137721861636324	0.36696228944213
HIVEP3	green	0.96104870031601	1.21300650809924e-25	0.0968808179994885	0.526668298424465
ZNF521	green	0.89327733275549	1.57364679795722e-16	0.403196707417414	0.00602785149996741
BLOC1S1	purple	0.96424528999969	1.98673768146751e-26	-0.148309	0.330908999674998
PPP1R13B	green	0.952571248845715	7.68684909000081e-24	0.164403964786899	0.280505375335703
SEC61B	purple	0.973121034456841	4.70056718036195e-29	-0.146038	0.338452553378532
MEIS1	blue	0.913687459682235	2.02212973732143e-18	0.115044824600984	0.451731786321964
EGFR	green	0.923929814293654	1.48450538124908e-19	0.141297470500365	0.35453118923864
HLA-DRA	purple	0.883762192474422	8.94764753417906e-16	-0.179024	0.239326231123608
C11orf96	purple	0.795734510643016	6.48458167658197e-11	-0.120981	0.428568442833863
COA6	purple	0.949671806849638	2.67411311088163e-23	-0.087234	0.568810483018662
PABPC1	green	0.962486484200374	5.48154769276821e-26	0.0945748857029221	0.536600181428393
FXYD3	purple	0.81211794029188	1.2815989471581e-11	-0.0652538	0.670201075955909
CCR7	purple	0.875811439697037	3.41748498233083e-15	0.0753701204854936	0.622668853961129
ZHX2	magenta	0.948551976180538	4.24410180058495e-23	0.155394178275693	0.308065084299116
HNRNPA0	purple	0.978125821070801	5.88630654277164e-31	-0.110841	0.468539085314454
RRAGA	purple	0.963468674539364	3.12912575926592e-26	-0.0405237	0.791548453244685
GRB10	green	0.954511164852764	3.19327982727196e-24	0.301682392714097	0.0440103113283794
MRFAP1	purple	0.964870805978714	1.36787418542996e-26	-0.0658278	0.667467167574682
CHMP2A	purple	0.984948232835973	2.03567991309254e-34	-0.130026	0.394591646376715
ADAMTS9	yellow	0.819173520877852	6.06901328639725e-12	0.37774089916106	0.010521084853231
MIR99AHG	green	0.926921416736811	6.45852748513391e-20	0.296201481010474	0.0481945644541998
SNRPG	purple	0.966482949132921	5.06246544235998e-27	-0.130449	0.393041806063823
HSPB1	purple	0.886008633219879	6.01968008659665e-16	0.0317198835090275	0.836128848422972
GPR39	greenyellow	0.914596708913764	1.62536225210245e-18	0.00816612639515511	0.957541193999631
UQCRFS1	purple	0.981236506547623	2.24342209291217e-32	-0.178722	0.240132511811139
CTSH	green	0.864541625435858	1.96705266249435e-14	-0.0945376	0.536761411403615
LDHB	green	-0.956898	1.02626297705336e-24	-0.222189	0.14238774675953
COL4A1	green	0.898298716942012	5.87944025353185e-17	0.340808661608735	0.0219668299910847
MRPL34	purple	0.97235274948251	8.55042822742477e-29	-0.077062	0.614858950405382
C1QBP	purple	0.977080900038849	1.58879046461338e-30	-0.0895512	0.558547460561048
PTK2	magenta	0.967897986024337	2.0309653369457e-27	0.184878459043332	0.224054638582656
RPL26L1	purple	0.959587536959328	2.6386997920505e-25	-0.109466	0.474105637131304
DNAAF1	black	0.904187993080472	1.73214116760526e-17	0.173592917294535	0.254114833997993
ABCC4	green	0.943625552225434	2.88497320567608e-22	0.128507106191851	0.400185597248673
COA3	green	-0.931114	1.89171058225075e-20	-0.0967453	0.527249611671275
CHCHD1	purple	0.969316629696497	7.79465613633749e-28	-0.0676109	0.659002672627339
HDAC9	green	0.879607984501067	1.82351083598233e-15	0.262875553241521	0.0810493977105214
AGR2	green	-0.82422	3.4850853107842e-12	0.062809241168148	0.681889701089289
LINC01473	blue	0.972062346096358	1.06734128290733e-28	0.140575448344934	0.357020495237613
ATP8B1	green	0.915151520051671	1.4208533625443e-18	0.336134693802427	0.0239742613504067
STX18-AS1	green	0.936205351295625	3.82187680350117e-21	0.106706580484954	0.485388381637772
ISOC2	green	-0.946197	1.08491205798504e-22	0.0454147524768129	0.767053416013339
OPHN1	blue	0.946717668373273	8.84919090208632e-23	0.148911801979576	0.328926706369508
SNRPD3	purple	0.968390780178503	1.46346378646632e-27	-0.114125	0.455381329934049
COPRS	purple	0.966122681044416	6.34797324078009e-27	-0.0733588	0.632007125805104
EXOC4	blue	0.947741425031501	5.89134705213399e-23	0.209390841436045	0.167442546691405
C12orf57	green	-0.954957	2.59552803498003e-24	-0.079466	0.603833842472352
EML4	blue	0.920240774989553	3.95810858071541e-19	-0.0168474	0.912533821593516
SETBP1	blue	0.94436722735072	2.18635384889827e-22	0.256664957417018	0.0887642091247093
CD2	purple	0.888615577608753	3.7604846811157e-16	-0.0407358	0.79048208890266
DCN	purple	0.832561302491957	1.3388955385438e-12	-0.0553015	0.718241135961144
DISP1	green	0.914737158382771	1.57109916208334e-18	0.0330983090064558	0.829111463840576
PHB	purple	0.977485891212434	1.08726975563401e-30	-0.166301	0.27491449225593
RNF130	magenta	0.965921340856672	7.19605711279334e-27	0.105397259586821	0.490789641053932
IL6	purple	0.833452399062541	1.2051039640327e-12	-0.0142032	0.926220125332302
NDUFA8	green	-0.967502	2.63366643950682e-27	0.00474251273999752	0.975334421181777
PLXDC2	blue	0.934987107282029	5.66976070845129e-21	0.0422439687780257	0.782909281629582
NDUFB4	green	-0.963349	3.35250340305642e-26	-0.0749073	0.624812455374486
MYO1D	green	0.952668888745336	7.36089561206374e-24	0.168062240895437	0.269791603331784
WDPCP	magenta	0.943597564595362	2.9151038511706e-22	0.135175575066155	0.375972481882799
DMD	green	0.921086122832949	3.17487722350604e-19	0.125115029391321	0.412841067018021
C12orf75	green	-0.918551	6.10613099806677e-19	0.104058481311353	0.496344462961676
MRPS33	green	-0.934089	7.54615168340087e-21	-0.0210993	0.890579960543222
PARK7	purple	0.974046353769829	2.23372608713752e-29	-0.126909	0.406120626740975
MYL12B	purple	0.974449633169155	1.60154510350154e-29	-0.16886	0.26749147926528
DUSP4	green	-0.86855	1.07520783256522e-14	0.123369624648596	0.419441074313974
IQCJ-SCHIP1	green	0.970422193895188	3.58028722209129e-28	0.0777619911362821	0.61163981810598
HMCN1	green	0.916522912312093	1.0149995423399e-18	0.407502948159654	0.00546252350973074
TBC1D8	green	0.938712710022179	1.65523441864497e-21	0.153272165611401	0.314799067369965
RERE	magenta	0.969301219390277	7.87805203254308e-28	0.168968003065907	0.267181353919746
MAPK10	green	0.887600116453567	4.52305184875474e-16	0.126838338749559	0.406383238796487
CLIC5	green	0.879024935824339	2.01091715230537e-15	-0.0879128	0.565795098477787
ZEB1	green	0.950179074266175	2.16171279640774e-23	0.242688517424245	0.108206038432096
MS4A6A	purple	0.900638804005164	3.65101086351612e-17	-0.114996	0.451926957551815
SUMO3	purple	0.96879666674153	1.11290682791445e-27	-0.147592	0.333278510917652
CDKAL1	blue	0.964166345623866	2.0815780119897e-26	0.182795176600038	0.229410263810299
SNRPE	purple	0.978025821109049	6.48638073099254e-31	-0.0815321	0.594427519432484
PTPRD	blue	0.941631161718001	5.97107136623622e-22	0.0616415623735144	0.687499310262099
RPS19BP1	purple	0.97606060218633	4.01204861766955e-30	-0.0917552	0.548867218187453
CDC42BPA	blue	0.970943203805454	2.45596595455063e-28	0.175253557793687	0.249529630486794
SCMH1	magenta	0.96283745386687	4.49420128930468e-26	0.131491496063894	0.389239550297698
SH3RF1	green	0.938021991482501	2.09161041021506e-21	0.119694066684504	0.433533639698286
CALCRL	blue	0.919667206848896	4.5905194948543e-19	0.176737293778939	0.24548033636743
S1PR4	purple	0.911720111394416	3.21759592187902e-18	-0.23614	0.118364706332784
DISC1	green	0.935504151034619	4.80037549379794e-21	0.229283283906884	0.129756798905883
PDE1C	brown	0.824125471205017	3.52190070836484e-12	0.084755857832037	0.579881461004721
CXCL1	purple	0.754702067254087	2.12165361527119e-09	0.0441442072053351	0.773396029965077
NR2F2-AS1	green	0.952029255952388	9.7608758729329e-24	0.221279365741689	0.144071860346508
TUBA1A	purple	0.939092415463892	1.45375692080806e-21	0.0120865067177051	0.937191709752012
PPIF	purple	0.947488056118715	6.52036312963366e-23	-0.26699	0.0762347721509937
MIA2	magenta	0.981063843641696	2.72709297986382e-32	0.0842392213874382	0.582201740087998
DYNLRB2	purple	0.817043044811778	7.63140202727622e-12	0.111985277152887	0.46393112189444
SPIDR	magenta	0.952989739391418	6.37989774504008e-24	0.0835981373549193	0.585086729464914
EXOC6	green	0.951816840755229	1.07107394151454e-23	0.258318007622371	0.0866571703852178
UFC1	green	-0.973793	2.74634135925541e-29	-0.0858666	0.574907179627208
RAI14	green	0.91762440172398	7.71452116146596e-19	0.334297531840043	0.0248042365384996
IFI27	green	-0.93668	3.27009636382472e-21	-0.0523496	0.732709279513538
MGP	purple	0.835426910924255	9.52246478950488e-13	0.215139474683005	0.155820620285902
CACYBP	green	-0.942297	4.69661838857996e-22	-0.122959	0.421001434602367
PSME1	purple	0.975801489210898	5.04397796755687e-30	-0.169959	0.264345492876335
MCF2L	green	0.933722246423387	8.47102142851344e-21	0.150565855769924	0.323521582707195
C1orf122	purple	0.9140314745227	1.86226886232233e-18	-0.0488582	0.749940328949002
MED13L	blue	0.937847427966828	2.2180866850166e-21	0.128006674179153	0.402038374384269
RNF149	green	0.951177364189572	1.41301046745915e-23	-0.017324	0.910069463781565
CATSPERB	green	0.943364854318199	3.17748405192489e-22	0.162016472150571	0.287645745182246
ERP29	purple	0.983886829696462	8.71811252196025e-34	-0.158373	0.298768611479647
MEIS2	blue	0.950304573188733	2.05018888694169e-23	0.165479117790678	0.277328130779267
GPM6A	green	0.93626238249909	3.75124516293021e-21	-0.00100171	0.994789367739303
PCCA	blue	0.948715070169909	3.9705368959926e-23	0.187825237039723	0.216627392666607
CISD3	green	-0.960619	1.52947305617993e-25	-0.187079	0.218491801793301
ZBBX	black	0.884891134829093	7.33919730399589e-16	0.264631185586585	0.0789666167928272
GSTM3	purple	0.920460016181575	3.73898661096088e-19	-0.0361508	0.813619072428632
HHIP	greenyellow	0.542113431638427	0.000119839632329437	-0.501407	0.000450356027795329
PTPN13	green	0.884960134009411	7.25036143357413e-16	0.024246538079441	0.874380488514587
PLXNA2	green	0.940037292018555	1.04866678592697e-21	0.186798314717928	0.219196053088099
PGAM1	purple	0.945848870911283	1.24204410822071e-22	-0.102895	0.501198088398574
NDUFB9	purple	0.975325613588389	7.6307464777144e-30	-0.180865	0.234451243107855
MANF	purple	0.963007187732027	4.07983481392121e-26	-0.131085	0.390720000030475
PPARG	green	0.90063830834048	3.65138389442111e-17	0.00854470694605862	0.955574729220267
NOTCH4	green	0.934296216235018	7.06706859617908e-21	0.169540026556047	0.265541540529661
ESR2	yellow	0.922748637988337	2.04289223861065e-19	0.421452710305681	0.0039356247475491
TMEM256	green	-0.963623	2.86116859865775e-26	-0.0544063	0.722618583703746
TSEN34	purple	0.929332812643761	3.21688350543225e-20	-0.158253	0.299140488090239
MSL2	green	0.912644566551213	2.59020253074935e-18	0.0855691664166457	0.576237291095207
PEAK1	blue	0.967826484831939	2.12896164726644e-27	0.229765801235774	0.128929179029901
TMEM126A	purple	0.956898120245236	1.02639811337432e-24	-0.168561	0.268352164716484
UBE2S	purple	0.919782362959308	4.45631428928248e-19	0.0519109766210512	0.734866896568374
ELL2	blue	0.900908672773237	3.45319116780107e-17	-0.0488235	0.750112175513125
SNRNP25	purple	0.940076316460725	1.03449733339138e-21	-0.0393467	0.797473826135367
FER	blue	0.968597008246599	1.27395156189079e-27	0.028712621649301	0.85148144852656
DPH3	purple	0.962538699524527	5.32259522836412e-26	-0.157661	0.300972957962974
WWC2	green	0.931274377788719	1.80233432772275e-20	0.075578341387637	0.621705437744207
SAMD4A	green	0.927053045095662	6.22127397434137e-20	0.150695021131109	0.323101859557026
KIAA1328	magenta	0.9561449547173	1.47842407163263e-24	0.0650052935735675	0.67138572953753
HSPA1A	green	0.308114446965085	0.0394822451511501	0.257677488000909	0.0874689289006307
RSRP1	green	0.953380755161382	5.35209528507229e-24	0.123563069589602	0.418706654311909
TTTY10	green	0.272232625845485	0.0704289665007246	0.214294976416772	0.157489882863751
SYNE1	green	0.948804262802973	3.82811099511318e-23	0.0195918893962143	0.898354580475203
ITM2A	green	-0.883733	8.99404638499936e-16	0.0176775379957283	0.908241850314518
PRDX4	purple	0.958722261342723	4.1252617317682e-25	-0.0371964	0.808328250512343
CREG1	green	-0.969469	7.01604888647127e-28	-0.188607	0.214685371815729
GPSM3	purple	0.953774722832216	4.47706421772807e-24	-0.153489	0.314106481687584
FOXP2	blue	0.925008924192285	1.10390393131275e-19	0.0596044256748367	0.69732553809911
POMP	green	-0.961174	1.13343327339334e-25	-0.115293	0.45075046573689
TPI1	purple	0.971324474114361	1.85581503337357e-28	-0.153112	0.315310558667919
SCFD2	magenta	0.966024449919662	6.74910384551074e-27	0.125262304221163	0.412286897103174
MRPL41	purple	0.972821022325569	5.94977111280761e-29	-0.0904671	0.55451487214104
HIVEP2	green	0.916797087492461	9.48331182242486e-19	0.191493731565988	0.207622226199352
PLA2G7	green	-0.828686	2.10154968444973e-12	0.0159360289389557	0.917248388241647
CEP112	magenta	0.964898991172233	1.34484856098393e-26	0.127066517943032	0.40553255694065
CTIF	green	0.945596203393695	1.36930818097479e-22	0.0681588625189105	0.656409954556395
TRIO	magenta	0.95859361959484	4.40502320371555e-25	0.102110332371939	0.504485066587313
NEDD8	purple	0.972475454313094	7.78006191281709e-29	-0.153132	0.315247833508475
RTKN2	brown	0.488506527147827	0.000662575190127557	-0.417859	0.00428808688139328
RIMS1	yellow	0.890728320933058	2.54622254056592e-16	0.263588097928106	0.0801989498147109
CAPS	purple	0.893658356614626	1.46290135177444e-16	0.0615894482878122	0.687750059850985
ARPC3	purple	0.964227134921413	2.00817707370739e-26	-0.157671	0.300943525783188
CCNO	black	0.834351553312633	1.08296926835303e-12	0.316268142197458	0.0342977280486798
SCEL	greenyellow	0.827948864438588	2.28673781660835e-12	-0.421778	0.00390500370694461
CLEC16A	green	0.959269059729791	3.11390656853267e-25	0.121113081566076	0.42806192235485
SCAND1	purple	0.977599349546917	9.76452522124564e-31	-0.109416	0.474309901152572
MT1E	purple	0.79527205759111	6.77373814824444e-11	-0.243331	0.107245748756801
LSM2	purple	0.957665338346257	7.0297847305309e-25	-0.031252	0.838513588559466
CSGALNACT1	green	0.904525776048074	1.61105059458946e-17	0.327061274968496	0.0283104231108323
JOSD2	green	-0.870888	7.4902263497523e-15	-0.019008	0.901368844442664
LSM4	purple	0.975743011834352	5.3095623811076e-30	-0.120668	0.429772874554382
A1BG	green	-0.901917	2.80057543805059e-17	-0.0312004	0.838776725061881
TMEM14C	purple	0.969412573379888	7.29404255734642e-28	-0.089852	0.557221412395311
ULK4	blue	0.95584753290055	1.70458705335492e-24	0.178048046208005	0.241940317483579
SNRPB2	purple	0.95564172207799	1.87996251696868e-24	-0.139742	0.359907797716719
IGFBP2	green	-0.774053	4.48308083140135e-10	0.248811985865391	0.0993224615148662
FGD5	green	0.901662211177684	2.95325297421715e-17	0.223497102835715	0.139993465814789
MIPOL1	blue	0.969203018618367	8.42977916685946e-28	0.130018636476355	0.394619521255212
RABAC1	purple	0.975867097938885	4.76107440782544e-30	-0.149364	0.32744501765995
ADAMTSL1	yellow	0.922268960168392	2.32235773719734e-19	0.40685227451423	0.00554486568539919
GNG5	purple	0.964001983093145	2.29304496222665e-26	-0.163611	0.282863548589928
ITGA1	green	0.881148932180155	1.40461886602448e-15	0.201798048932453	0.18373833036477
COL4A3	greenyellow	0.906662724468197	1.01214504142338e-17	-0.178001	0.24206725453277
KIF26B	green	0.903400561322292	2.04882482344584e-17	0.325436327280474	0.029151915726228
ATRAID	purple	0.971055217725771	2.26276929073927e-28	-0.133437	0.382199794198973
LANCL1-AS1	greenyellow	0.712870679082847	3.93107779204589e-08	-0.325509	0.0291138034188341
PIBF1	magenta	0.94584308446318	1.24482840092789e-22	0.0952758976162154	0.533571264719333
PPP1CA	purple	0.978809132903184	2.99532032778095e-31	-0.156874	0.303425320226553
ZSWIM6	green	0.950356993639343	2.00524533048708e-23	0.152556787480546	0.317090116503225
CCRL2	purple	0.920409043762772	3.78887877621538e-19	-0.230311	0.127998440804352
RPL22L1	purple	0.968122549051963	1.75035061536767e-27	-0.161702	0.288595173400344
ABCB1	yellow	0.90862901801591	6.53385002831488e-18	0.327636738841275	0.0280172970557991
INPP5A	green	0.943597121845188	2.91558289845442e-22	0.11790581728053	0.440484348527827
NDUFAB1	purple	0.983215060239349	2.08414157979653e-33	-0.0799073	0.601819420285777
IFITM2	purple	0.945031357964648	1.70012731618796e-22	-0.158331	0.298898859263184
FAT4	green	0.944167432077536	2.35679392159712e-22	0.256484986811074	0.0889959889484343
SEMA3A	green	0.895947713827992	9.38065637592291e-17	0.244453852545516	0.105584996623357
TALDO1	green	-0.976262	3.35293401312991e-30	-0.280241	0.0622421057582196
LAMTOR1	purple	0.964625897870402	1.58437477964309e-26	-0.171263	0.260644109979343
PRDX2	purple	0.965872540574951	7.41728757901938e-27	-0.146905	0.335561150421186
CCDC141	green	0.777773619890925	3.26722124432084e-10	-0.199484	0.1889223396956
RBFOX2	blue	0.941402997916789	6.47863436246631e-22	0.292593762022867	0.0511205994979237
TCF12	blue	0.985240733736412	1.33882466069777e-34	0.225934775156727	0.135610152817539
MIEN1	purple	0.960768115436969	1.4114581123746e-25	-0.102436	0.503119005393386
BNC2	green	0.901279146643139	3.19813067225446e-17	0.386440102629739	0.00873887347092382
DLGAP2	yellow	0.911841103814336	3.12796386364996e-18	0.351088425112593	0.0180436042497129
PTPRB	green	0.926558818806965	7.15735493192914e-20	0.150912777177819	0.32239503643345
TCF7L1	green	0.952239683796743	8.89927963545858e-24	0.219084192302407	0.148194632484585
RAB7A	green	0.926559518056711	7.15594063505374e-20	0.0431184727216851	0.778527230307994
PACS1	green	0.944285131659719	2.2549181026294e-22	0.303535573464805	0.0426643607442607
NR5A2	yellow	0.914781399279453	1.55436585230239e-18	0.27698093069265	0.0654779224731136
CA4	brown	0.387075021831171	0.00861965560932914	-0.298655	0.0462831135258101
MS4A15	pink	0.657663114097358	9.17736386156262e-07	-0.366896	0.013172083637112
AURKAIP1	purple	0.976297196814082	3.2482033888169e-30	-0.129122	0.397914141075782
FGG	green	-0.312225	0.0367934391100367	-0.34637	0.0197637890997292
KCNQ3	blue	0.891179113541108	2.34053094289051e-16	-0.0272463	0.858987199615175
UGGT2	magenta	0.970257708014925	4.02708468797939e-28	0.089023854484947	0.560875385393804
SBF2	blue	0.951134231620053	1.43947182229947e-23	0.201832794017795	0.183661269196641
RBP7	purple	0.850515025460233	1.41259800285302e-13	-0.077886	0.611070254075016
CCDC7	green	0.965950534206552	7.06673060581359e-27	0.157602069633068	0.301156924537311
PHLPP1	green	0.944191423712757	2.335679047254e-22	0.146295892537388	0.33758949740369
MRC1	green	0.938686095829225	1.67030934982258e-21	-0.0710726	0.642690403389647
PLCXD3	green	0.896739922363254	8.02432405013596e-17	0.247168123830254	0.101650176289541
U2AF1	purple	0.711539626955283	4.27745132528632e-08	-0.112871	0.460382446783722
RPS6KA2	green	0.963449139908312	3.16468278050567e-26	0.167758972854668	0.270669326922432
PLCL1	green	0.936829778596609	3.11291731278509e-21	0.141953827795151	0.352277474133148
RAPGEF2	magenta	0.970609528323123	3.12894926317463e-28	0.160571480910592	0.292024287051724
ZNF608	blue	0.935269234693072	5.17837485540917e-21	0.247623091542507	0.101001788183606
GABARAPL2	green	-0.979974	8.98576357794178e-32	-0.101201	0.508306534574409
PVT1	yellow	0.905093605682114	1.42539530975046e-17	0.306085038446404	0.0408677502117354
TBC1D10C	purple	0.80394753116281	2.93180922994238e-11	-0.170572	0.262598943653875
PCDH17	green	0.887932162392702	4.25888320408651e-16	0.370692506911521	0.0121856173902993
ATP12A	black	0.794671925103267	7.16710469040573e-11	0.318444589061272	0.0330130159292494
LINC00342	green	0.923268402371229	1.7762383558708e-19	0.266886443003605	0.0763529962584073
SPECC1L	magenta	0.971610532175169	1.50021541991939e-28	0.125239305478175	0.412373409384948
MIR100HG	green	0.904192634962397	1.73042009613025e-17	0.200548625894087	0.186524795831165
ZBTB16	green	0.91653578033555	1.01177348592509e-18	0.154162228811256	0.311963268400722
DAD1	green	-0.973709	2.93887423755591e-29	-0.0166341	0.913636737062865
TBC1D5	blue	0.977763877516229	8.3468850604743e-31	0.143254839232698	0.347836154652569
KIAA1671	green	0.934828337238209	5.96545813994146e-21	0.308574194558806	0.0391737732795201
MICAL2	green	0.917801733846023	7.37854008524519e-19	0.0589980570318985	0.700259957033183
ARID1B	blue	0.978787926181197	3.05979144389598e-31	0.207561896263973	0.171268540103811
LYN	green	0.906713872368945	1.00081051370091e-17	0.0233564787395518	0.878956876438297
PIM2	purple	0.912408154317027	2.73855753746134e-18	-0.0709588	0.643223823710743
HINT2	purple	0.945256144643881	1.56027182261654e-22	-0.145086	0.341643288670378
POSTN	yellow	0.688168118930944	1.75208464938372e-07	0.698038842647477	9.81701536170502e-08
PTX3	purple	0.756125300511213	1.9017450875427e-09	-0.368801	0.0126687257900798
ARHGAP31	green	0.936602107647324	3.35553886245932e-21	0.130387486233563	0.393268154358088
ASAP2	green	0.952462719734856	8.06525726727491e-24	0.291461559182209	0.0520678887508146
ISCU	purple	0.973907605839864	2.50159452780607e-29	-0.162233	0.286994693392821
FAM120B	magenta	0.952301242130171	8.66123656904353e-24	0.157858725013487	0.300360397583986
SOD3	purple	0.864879256362832	1.87087334131425e-14	-0.129251	0.397441870196642
TMED2	purple	0.979618641088562	1.30687672738962e-31	-0.122101	0.424274313631367
ERC1	magenta	0.981936305563181	9.97722956059597e-33	0.184366231340559	0.225363388202761
MYO15B	green	0.93998789962381	1.06686542487275e-21	0.158234565920059	0.299196426134841
LDHA	purple	0.951047600948516	1.49404973613415e-23	-0.197624	0.193165257439809
ARL6IP1	green	-0.959034	3.51657101407046e-25	-0.10712	0.483688975335263
CD55	green	0.822482639805398	4.22659797697515e-12	-0.223674	0.139672137023329
SNAPIN	purple	0.948440032366756	4.44214549645211e-23	-0.124417	0.415471746818724
SAMSN1	purple	0.810726983352838	1.4796257242114e-11	-0.389287	0.00821522952328069
MAP2	blue	0.859875927713614	3.88002250763499e-14	-0.180029	0.236656689566432
FRYL	magenta	0.967545864688488	2.55884566198866e-27	0.218238957317856	0.149805035998054
CPM	green	0.849031633779764	1.71966884247483e-13	-0.0369116	0.809768622896849
ACTG1	purple	0.969055861308463	9.32591785851057e-28	-0.0164171	0.914759338328626
NAV1	green	0.915787225639715	1.21658168044987e-18	0.243661922926189	0.106754722255739
MRPL18	purple	0.952022082313677	9.79160324613287e-24	-0.102527	0.502738376236476
H2AFY	magenta	0.963091021168293	3.8888480398931e-26	0.0911579470419642	0.551482364396359
ST6GAL1	green	0.920299909104819	3.89783486907944e-19	0.377058191060143	0.010673282828732
ST6GALNAC5	greenyellow	0.922544096550016	2.15791129869903e-19	-0.199244	0.189466490382382
ACSL1	blue	0.898377422017257	5.78706401019553e-17	-0.172442	0.257325856775419
KIAA0825	blue	0.958205273045353	5.36327415202711e-25	0.176011850047257	0.24745457007918
RHOJ	green	0.883657198866869	9.11312768381941e-16	0.392009926271886	0.00773989442750025
RBP1	green	-0.906747	9.93611899375473e-18	0.0181548592679977	0.905775232150677
RAB11FIP3	green	0.973081709236788	4.84877328483356e-29	0.133567981403572	0.381728274001671
RNF7	green	-0.967407	2.80093787266557e-27	-0.117531	0.441947636001619
GSE1	green	0.958927120938777	3.71435619665662e-25	0.260316755878551	0.084161747832165
CXCL2	green	0.887180318494481	4.87930067469962e-16	0.00598697653414729	0.968864865879212
SCGB1A1	yellow	0.560869693444265	6.13676473124146e-05	0.301801655974314	0.04392266307126
PDE3A	green	0.902835244950513	2.30926066969062e-17	0.170664690589548	0.262337010053513
GLCCI1	green	0.872081487901334	6.21132478045524e-15	-0.00356242	0.981470804916639
SLC24A3	green	0.915416573557786	1.33201214127635e-18	0.0412444020447709	0.787926152122203
SLC9A9	green	0.905254744689277	1.37652715472863e-17	0.201204785434123	0.185057696444449
KANK1	green	0.89753731873468	6.84830585089057e-17	-0.0162811	0.915463074038678
DGKH	blue	0.95019966398821	2.14302848246951e-23	0.300130905774285	0.0451635523581327
MAP3K8	green	0.932964043408562	1.07354359163104e-20	0.0196803807814	0.897897895145259
KIF13A	magenta	0.955473826628133	2.03561250069511e-24	0.142535803993973	0.35028649393718
LINC00894	green	0.973278700060377	4.1485606815739e-29	0.123838759572354	0.417661250897767
HNRNPA1	purple	0.991375885141747	1.36751290131812e-39	-0.144754	0.34276138337857
MRPL12	green	-0.951138	1.43717321334572e-23	-0.0345181	0.821897279436833
TCF4	green	0.927159583257757	6.03533155094129e-20	0.32290138991563	0.0305060384593315
TACC2	green	0.877024552031087	2.80231837043554e-15	-0.132672	0.384959456307038
ZNF609	magenta	0.949094557260111	3.39744880987395e-23	0.23637577993058	0.117986351934958
TMCC1	blue	0.944688390061785	1.93670066716628e-22	0.278007548704959	0.0644447668120612
TMEM135	blue	0.949826728653009	2.5064988540938e-23	0.135804240668048	0.373735756009583
SH3D19	green	0.94628631629193	1.04787504549819e-22	0.0575039121525075	0.707508986531922
TMEM60	green	-0.95279	6.9743606921956e-24	-0.0185683	0.903639382615429
ITPR2	blue	0.946667606634677	9.02514339279551e-23	0.0821082819075073	0.591815960884256
JUNB	green	0.902334837692085	2.56572288918865e-17	0.114168248983193	0.455208953296751
TIAM2	brown	0.892400647838548	1.85940959002829e-16	0.121890945914422	0.425079012002123
ARHGAP6	blue	0.887800428769062	4.36188782609412e-16	-0.0976583	0.523340178881545
LINC00571	green	0.953449416905663	5.18871639651711e-24	-0.00419019	0.978206297694917
TOX2	green	0.887645395327805	4.48613584974229e-16	0.0192087220930309	0.900332398818564
MRPL11	purple	0.970299804445256	3.90793324911476e-28	-0.136334	0.371857528730682
SCGB3A1	yellow	0.838273957395429	6.74355077719223e-13	0.376583329054026	0.0107802550184762
PDCL3	green	-0.952753	7.09083644850614e-24	-0.120379	0.430886620466633
ACACA	green	0.940669451601184	8.40311446335191e-22	0.0154380193274244	0.919825872004035
EHBP1	blue	0.949444545281801	2.93940110597007e-23	0.10663674652085	0.485675677381588
PPIA	purple	0.986576622306941	1.76432891199971e-35	-0.158217	0.299251725223105
FBXL17	blue	0.971586573531692	1.52730956471592e-28	0.198489887960738	0.191181664125403
SLC22A23	green	0.912284454490711	2.81936203166195e-18	0.275586723510192	0.0669020503402134
DGCR6L	purple	0.945635671057074	1.34864323819969e-22	-0.0898983	0.557017669263254
KRT15	black	0.806750789175483	2.21690491623866e-11	0.36264626077159	0.0143560654543663
GAB1	green	0.941959569868606	5.30644061285865e-22	0.104860814469581	0.493011566854296
ARHGEF38	green	0.904003684397047	1.80180502795211e-17	-0.0199034	0.896746941723874
CP	turquoise	0.866938532708859	1.37396844182938e-14	0.572176289510062	4.01879276901337e-05
BMPR2	green	0.946574674220552	9.36063166161403e-23	0.250956242228171	0.0963481027635102
SLC22A3	green	0.819484442053742	5.8680061435694e-12	-0.0518938	0.734951364731569
SCAPER	magenta	0.950133164651133	2.20393337269629e-23	0.143013530493642	0.348657315415643
TRAPPC1	purple	0.977571059375213	1.00303106042779e-30	-0.140724	0.356509027975969
PRH1	blue	0.966269384267799	5.79090605897989e-27	0.122455804404422	0.422920285347963
FAM171A1	green	0.892226107363242	1.92188889695627e-16	0.390930961930637	0.00792531328549309
GLUL	green	0.856330522653433	6.39765335427226e-14	-0.107903	0.480478954280999
RBFOX1	green	0.866027731791139	1.57596541829173e-14	0.18381069524072	0.22678873323837
PHPT1	purple	0.970686407279364	2.95987666776376e-28	-0.0775257	0.61272550631097
NCALD	brown	0.836973435421968	7.90132234735944e-13	0.233290583976672	0.123002986190339
SFTA2	purple	0.878156946494285	2.32402423524082e-15	-0.405903	0.00566689890570464
RPTOR	magenta	0.965289201622105	1.06164132982408e-26	0.093215832928242	0.542496008359588
BACH2	green	0.914438322095838	1.68868926122249e-18	0.0814102452594003	0.59498053059521
TAGAP	purple	0.891178741264938	2.34069411654629e-16	-0.15002	0.325298720610469
NPNT	greenyellow	0.850189195738361	1.47523500109439e-13	-0.285126	0.0576330837494209
FOS	green	0.575928828601746	3.47996457797895e-05	-0.210744	0.164651825102089
CTSB	green	0.974544197801655	1.4802109585049e-29	0.143460986625735	0.347135586514011
MUC4	turquoise	0.827611009741713	2.37669977356286e-12	0.539931548767677	0.000129212325884194
RUNX1T1	green	0.90350697366629	2.00302734764249e-17	0.163402160483366	0.283487241134587
GTF2H5	purple	0.963615005147221	2.87461135954818e-26	0.00810422169795112	0.95786277021356
MACF1	magenta	0.979556346090153	1.39464243767515e-31	0.117144157379908	0.443463437447477
PTPN14	green	0.929322130958104	3.2270051085653e-20	0.337768622658342	0.0232557394388723
AP1S1	green	-0.888357	3.94247997473697e-16	0.0794377769675275	0.603962784753997
TSPAN8	black	0.870943453953253	7.42581428094936e-15	0.301078662399295	0.0444561889754908
ARAP3	green	0.946939578063254	8.10777815530566e-23	0.222821587046289	0.141226549598932
EPN2	green	0.935520573740445	4.77495527690181e-21	0.234950311514514	0.120284616347657
BUD31	purple	0.967987557198971	1.91425473408075e-27	-0.0820494	0.592082654415932
ARL2	green	-0.965187	1.12959936748963e-26	-0.0801434	0.600742563193293
SERPINF1	green	-0.874334	4.33945903276427e-15	0.123959465556317	0.417204006871514
ADGRF5	green	0.90007155741184	4.10241491445195e-17	0.0320818502785567	0.834284881051288
LILRB4	purple	0.877504382012892	2.58926122728302e-15	-0.0183586	0.904722798956937
SAMD5	green	0.93033893691657	2.38759952608598e-20	0.0959896901684207	0.530495714647183
MCU	blue	0.961531373959745	9.32233924970136e-26	0.163242745632924	0.283963641334737
NEDD4	green	0.939630889392908	1.20762164637534e-21	0.140495143159824	0.357298016998259
CD9	green	0.911823225377954	3.14105743662104e-18	0.182812590555366	0.229365135693566
TOX	blue	0.861052894430159	3.2765877555408e-14	-0.152219	0.318177132282881
LINC01376	green	0.971859620415198	1.24434307138772e-28	0.133449712704115	0.38215376936321
LRCH1	green	0.948372519737361	4.56580069629976e-23	0.217297684527282	0.151613530467843
LAMTOR4	purple	0.986917211919974	1.01874350292731e-35	-0.140744	0.356438726571749
CYP2B6	greenyellow	0.90096754912039	3.41140604875417e-17	0.0141486903168749	0.926502597123744
ATOX1	purple	0.975206530914466	8.45297887767585e-30	-0.134216	0.37940098844914
TSPAN9	green	0.942742205250252	3.99446520111808e-22	0.214010268424297	0.158055581090409
LIFR	brown	0.886263987476572	5.75147298097037e-16	0.194341797488565	0.200814018586638
ATF3	purple	0.806440090703569	2.28716675990026e-11	-0.0587858	0.701288058012135
C20orf27	green	-0.935718	4.47980656533242e-21	-0.0706624	0.644614678567987
NBAS	magenta	0.96091234948061	1.30587394067626e-25	0.0336459188540368	0.826327268095324
LSAMP	blue	0.851361837059905	1.26135900209632e-13	-0.0561213	0.714240009598231
ERH	green	-0.965354	1.02046453055692e-26	-0.138872	0.362936301920151
ADCY4	green	0.894785769947186	1.17688368698751e-16	0.281708554462914	0.0608274789847834
VEGFC	green	0.877577034275772	2.55837153590372e-15	0.186708634315155	0.21942136960714
NLRP3	green	-0.737442	7.56137277469499e-09	-0.267278	0.0759063411440741
MYL6	purple	0.974444828743163	1.60795576837985e-29	-0.187099	0.218441876825568
ASAH1	green	0.925894343496075	8.62837278828147e-20	-0.0473176	0.757582746027799
HPGDS	purple	0.851497956985819	1.23852565256477e-13	-0.243917	0.106376243062794
NINJ1	purple	0.947997437210727	5.31465069736741e-23	-0.0708909	0.643542319737888
PRR13	purple	0.973671628384735	3.02877773679667e-29	-0.174936	0.250401186238863
LIMCH1	green	0.894031999675071	1.36150744187454e-16	0.0610899053073107	0.690155313591844
IRAK3	blue	0.896144251403068	9.02521659601072e-17	-0.0157369	0.918278872764624
TMED9	green	-0.958531	4.54870796035602e-25	-0.121289	0.427386119632527
OSMR	green	0.932566740263924	1.21409406891949e-20	0.223626244602191	0.139758643539132
EID1	green	-0.962216	6.38017215688858e-26	0.00117955956659861	0.993864283329824
CEMIP	green	0.892456684024206	1.83976245010587e-16	0.0898572740968373	0.557198283645709
CLDN4	purple	0.809219937589726	1.72657515445691e-11	-0.0532762	0.728157484112935
XPR1	blue	0.953203228955222	5.79750621977823e-24	0.224646842678607	0.137913135530636
GPC6	blue	0.85788236711212	5.14845587325619e-14	0.00991920609019589	0.948437431779605
OSBPL10	green	0.930578847743075	2.22229931820085e-20	0.342112915239793	0.0214325243273188
CACNA1D	blue	0.908986959883296	6.02708946084769e-18	0.0311174784773796	0.839199602617381
MAF1	purple	0.966735571214964	4.31330533857085e-27	-0.134297	0.37911100837407
PPIB	purple	0.972109902136399	1.02943868072389e-28	-0.163889	0.282035529656618
RPL36A	green	-0.9629	4.33639486033381e-26	-0.173395	0.254666286189017
VEPH1	greenyellow	0.804376174390457	2.80996223750807e-11	-0.3774	0.0105969506347568
FANCC	magenta	0.972613138361384	6.99441696515888e-29	0.0734952525168351	0.631371598142622
SEMA6A	green	0.917769915672691	7.43778285523865e-19	0.186537723372181	0.21985121683249
DKK2	blue	0.826512401018059	2.69288307573393e-12	0.0764176914995788	0.617828204150237
MFSD14C	magenta	0.962821355173109	4.53551783535264e-26	0.0694009304664162	0.650547538150734
DENND1A	green	0.946884374954285	8.28648836573786e-23	0.22241872013826	0.141965763701778
RNF181	purple	0.962515579008328	5.39242914242369e-26	-0.215078	0.15594175301201
TBCK	magenta	0.976647417415154	2.36677043031983e-30	0.181469848825469	0.232862734331704
HNRNPDL	green	0.902157797571074	2.66276047347707e-17	-0.059528	0.697694995020127
PRDM16	green	0.933639714365594	8.69348174525762e-21	0.0192476158850258	0.900131610901987
CASK	magenta	0.939171987083735	1.41459922781561e-21	0.0389485182136015	0.799481170056528
BLVRB	purple	0.921026824212127	3.22462335367193e-19	-0.378941	0.0102580726124628
RAB32	purple	0.928564885696185	4.02697164589802e-20	-0.247012	0.101873111189126
RASAL2	green	0.948886665165586	3.70085777379365e-23	0.242450445778721	0.108563277279326
PRDM5	green	0.95553364855264	1.97879826897836e-24	0.0828956880494841	0.588255209764471
SNAP25	yellow	0.675901762362116	3.49028723766215e-07	0.432175329861272	0.00303022235987903
ALDH2	green	0.951362829673385	1.3044111271494e-23	0.140052487633004	0.35883011369257
ATP11A	green	0.96262607509458	5.06637767406308e-26	0.0396854504263079	0.795767498229984
CD300A	purple	0.899651795874837	4.47001251215195e-17	-0.164751	0.279477278290172
AFAP1	green	0.931634041160477	1.61592527236544e-20	0.321492695372955	0.0312807941892505
LSM1	purple	0.974859611108497	1.13569815607984e-29	-0.0931268	0.542883261737183
PRNP	green	-0.935011	5.626669671687e-21	-0.0148494	0.922873251800592
PIGP	green	-0.945507	1.41711617473649e-22	-0.0838477	0.583962783275531
CCDC144A	green	0.933392526498636	9.39346021597901e-21	0.171986319713912	0.258604322668735
RBPMS	green	0.947969983118012	5.37382249345345e-23	0.22677165388894	0.134129143405207
FOSB	blue	0.121457867036932	0.426738310940967	0.0640200646309674	0.676090683321814
PIGR	purple	0.718528736756522	2.73091281298105e-08	0.113799012581066	0.456677965430831
EDF1	purple	0.99046923055716	1.16264589005147e-38	-0.108114	0.479617206042632
MRPL57	purple	0.973016366608383	5.1049186941115e-29	-0.146011	0.33854159040887
PFDN5	purple	0.97839672406555	4.51487417599279e-31	-0.21857	0.149172405540865
ROBO1	blue	0.903043856255948	2.20969794787278e-17	0.28934648995219	0.0538754332932228
RAB13	green	-0.975578	6.13181456837479e-30	-0.0276198	0.857074430487949
DUSP14	green	-0.888967	3.52603440270103e-16	0.0541834673847336	0.723709580783634
SSNA1	purple	0.955327916066773	2.1807683963577e-24	-0.170555	0.262647379791252
PRELID2	green	0.941552506151785	6.14161566412096e-22	0.214610171463131	0.156865336222249
PERP	purple	0.855071644481198	7.61637454706331e-14	-0.00954852	0.950361890161967
GKN2	purple	0.787749162390273	1.35651696074833e-10	-0.449962	0.00192721475358784
PLSCR4	green	0.902680942792443	2.38562616955517e-17	0.291842052614104	0.0517479711935916
TMEM70	green	-0.929417	3.13792812252322e-20	0.0365466658364442	0.811614974758227
MEA1	purple	0.952726359976605	7.17523140968765e-24	-0.122368	0.423255628403269
PLCG1	green	0.949651746260195	2.69658119999788e-23	0.160401388269825	0.292542519608212
MYO9A	blue	0.963183707740628	3.68760527334119e-26	0.0942326777283167	0.538081810249013
SERP1	purple	0.964361967502317	1.854065110866e-26	-0.200238	0.187221228425261
TMPRSS4	turquoise	0.896208800634833	8.91129220458842e-17	0.435904167156684	0.0027614149185868
EEF2	purple	0.982755759781755	3.70706398633113e-33	-0.122531	0.422634641852387
ARHGEF12	green	0.916927031708819	9.1820666362955e-19	0.316522127383576	0.0341457145729263
STARD9	green	0.941957201396589	5.31097162859024e-22	0.242428421743607	0.108596370914393
PIEZO2	green	0.892197916670729	1.93216501343929e-16	0.250962307906415	0.0963397875144326
VPS13D	magenta	0.918987984791802	5.46358890799372e-19	0.155084065879064	0.309043413750087
MT1M	purple	0.571545658450062	4.1164965149006e-05	-0.327408	0.0281333941937662
CD24	purple	0.788727972485579	1.2412913955257e-10	0.239024030009114	0.113805033882418
LAPTM4A	green	-0.969029	9.50040551026726e-28	-0.0550409	0.719514373255878
EPB41L4A-AS1	purple	0.942333986228586	4.6345704161199e-22	-0.134153	0.37962737338322
ANKRD36	green	0.95388559448351	4.25649944736001e-24	0.116566302787239	0.445730993685964
ZNF524	purple	0.89223430362244	1.91891092026737e-16	0.00824949808931781	0.957108113759648
ANKS1A	green	0.944651821019739	1.96369574557066e-22	0.171177057055288	0.260885691894781
CCDC115	purple	0.945213419014219	1.58598273928204e-22	-0.221759	0.143181815633246
SOCS3	purple	0.89404576889489	1.35790136515011e-16	-0.0234009	0.87872856978195
DCLK2	green	0.971659571344094	1.44617877180054e-28	0.20212978595705	0.183003512510054
ERCC6L2	magenta	0.963980451026216	2.32221731346554e-26	0.140140876574685	0.358523868511391
LMCD1-AS1	green	0.965289662466338	1.06134319507262e-26	0.202541364692941	0.182094763526146
UXT	green	-0.972321	8.76221627076319e-29	-0.14147	0.353937577660763
CAPN13	yellow	0.779276744719297	2.87023514389614e-10	0.278325487188614	0.064127449142991
GHITM	purple	0.964037094086753	2.24622228879356e-26	-0.199577	0.188713562224765
EIF4A3	purple	0.937699326960526	2.33105839564286e-21	-0.216943	0.152299620204512
SNX3	purple	0.970896400319655	2.54125736342953e-28	-0.0913731	0.550539744238478
AC098617.1	blue	0.935228999347659	5.2458902220141e-21	-0.00161829	0.991582211827844
MAP2K5	blue	0.92902294485926	3.52311412994876e-20	0.218031237674759	0.150202762226374
CORO1C	green	0.939638720929812	1.20435289826539e-21	0.118671990220956	0.43749880943524
LINC01515	green	0.883958278392007	8.64619343203585e-16	0.352189678818442	0.0176608394975191
LSM5	purple	0.958656859701591	4.26530966956861e-25	-0.0738736	0.629611496764363
EIF1B	purple	0.912879191513764	2.45053386210178e-18	-0.30015	0.0451491249250701
YAP1	blue	0.946225260576037	1.07312628790476e-22	0.150887913271488	0.32247569394053
DOCK6	green	0.920994490702348	3.25205918413836e-19	0.211429860370547	0.163250540110114
PROM1	turquoise	0.890142097410591	2.83942522756585e-16	0.413144509752991	0.00479208312421074
CNTN4	greenyellow	0.921298602410075	3.00254454312481e-19	-0.132932	0.384020750048499
FMNL2	green	0.911962730616856	3.04025395233932e-18	0.113644342239635	0.457294086388611
C16orf91	purple	0.923864521686062	1.51114102913552e-19	-0.135349	0.375355699941882
CIB1	purple	0.964557902311546	1.65004109956116e-26	-0.13114	0.390518238667974
KDM4C	magenta	0.944914579758101	1.77740958815538e-22	0.158971356227872	0.296923038306661
BGN	purple	0.759844429006748	1.42375606068447e-09	0.205003802490893	0.17672518312595
KAZN	green	0.912657119140194	2.58254271189539e-18	0.24283240475594	0.107990563533658
MYO18A	green	0.966450186141687	5.16824787691773e-27	0.194375621797478	0.200734118605684
FLT1	green	0.864735963150555	1.91113584930949e-14	0.248024269033124	0.100432698989494
LTA4H	green	0.978221970636191	5.35947939903934e-31	0.0401926579820044	0.793214078196107
ZFP36L2	green	0.914160651741187	1.80539998271861e-18	0.180189280938927	0.236232215688343
DHRS9	green	-0.760276	1.37625736714935e-09	0.24043772377779	0.111619538665856
MT-ATP8	purple	0.422727142361893	0.00381687920270532	0.194850258974918	0.19961528740186
RAPGEF6	magenta	0.942719184659391	4.02820361579054e-22	0.0441982955946569	0.773125717596927
CHCHD5	purple	0.960658556780746	1.49703665013265e-25	-0.165419	0.277504417959157
RFTN1	green	0.920794036959077	3.4271610061825e-19	0.119027382644965	0.43611777840503
FCGR2B	purple	0.781663561603757	2.33172439218802e-10	0.0544511551206843	0.722398975558325
PCNA	purple	0.965238610593216	1.0948595170751e-26	-0.120463	0.430563337288589
LRRC1	green	0.902177044375451	2.65204480220878e-17	0.202527623091387	0.182125052225096
NPM1	purple	0.970213214101407	4.15677880483569e-28	-0.173631	0.254008735272639
INPP4B	blue	0.901931410231854	2.79192463097022e-17	0.236344272208008	0.118036789667069
HDAC4	green	0.963883136889543	2.45852503341575e-26	0.133196449115911	0.383065879032489
MDH2	purple	0.952927315912995	6.56043844397885e-24	-0.128477	0.40029654359183
HLA-DRB1	green	0.933664688624729	8.62558591029426e-21	0.0956934197465669	0.531771213640874
PPP1R14A	green	-0.789272	1.18125471628216e-10	-0.287805	0.0552239927125281
ZHX3	green	0.957858814342745	6.3827877144571e-25	0.162251177579329	0.286938607326267
MIF4GD	purple	0.926725287812611	6.82804456448342e-20	-0.129969	0.394802416155402
ETFB	green	-0.976722	2.21199481753347e-30	-0.142929	0.348945073888225
HULC	green	0.934293224550315	7.07377647370156e-21	0.00105057738338459	0.994535199393639
PIP5K1B	green	0.865556986276656	1.69108337344162e-14	-0.15139	0.320848740499036
NR6A1	green	0.91531046651602	1.36692493314953e-18	-0.0321453	0.833961883802191
WWC1	green	0.871075803272738	7.2738082637912e-15	-0.0547563	0.720906118136747
CBR1	green	-0.954426	3.32212983547161e-24	-0.205074	0.176574198999624
HIP1	green	0.910476929997131	4.29133710808035e-18	0.226241297932354	0.135066297613866
LMBR1	green	0.958565404484269	4.46875278784331e-25	0.193669091312303	0.202407740927257
HLCS	magenta	0.962089881133196	6.84518354427559e-26	0.09942818297058	0.515802859857456
PLAC8	green	-0.906548	1.03803270814716e-17	-0.213729	0.158615788494515
ZMYND10	purple	0.868335779143392	1.11105457825537e-14	-0.086273	0.573091903042053
KANSL1L	green	0.921693971373539	2.70525476988826e-19	0.00778608193830805	0.959515513480903
GTF2A2	purple	0.96544809682514	9.63436500927132e-27	-0.0698463	0.648450670753003
NFIA	blue	0.912661928605688	2.57961359002423e-18	0.431603243733862	0.00307343720124399
PFDN2	purple	0.958825856754953	3.91234508336579e-25	-0.134719	0.377602387380093
FAAH2	green	0.941474554605026	6.31519611825227e-22	0.152303620298033	0.31790342270723
ANKRD28	green	0.887848687513381	4.32388246540971e-16	0.0934369388073252	0.541534691968387
ACTN1	green	0.907057634453164	9.27699504041798e-18	0.198253079992798	0.191722568727835
JUN	green	0.779401957571749	2.83929904541552e-10	0.0629671941709554	0.681132176493771
TNFRSF12A	purple	0.812523819384747	1.22870333590023e-11	-0.277822	0.0646305434282247
MLLT10	green	0.937361001563023	2.61000320488885e-21	0.127764116294364	0.40293819273623
EIF3K	purple	0.985366722630807	1.11484695764827e-34	-0.107595	0.481741031936417
PPDPF	purple	0.967085690427399	3.44764912955154e-27	-0.21349	0.159093364531409
ADCY9	green	0.952757863738491	7.07535597970441e-24	0.0643219017842826	0.674647955041068
MKKS	green	-0.950864	1.61617397385528e-23	-0.118803	0.4369883706751
MIF	purple	0.95070372757461	1.73073582399692e-23	-0.22006	0.146351725780787
ISCA2	purple	0.945995304419173	1.17352369404687e-22	-0.167913	0.270222564767338
SNRPF	green	-0.888519	3.82742204800168e-16	-0.13454	0.378242403729401
PLEK	purple	0.840618778230534	5.04988134387012e-13	-0.288128	0.0549392738039132
LINC01004	green	0.961961660937099	7.35118924017819e-26	0.100928332630067	0.509457099004433
SYF2	purple	0.960885498635888	1.324942200203e-25	-0.171401	0.260252753742223
CLASP1	magenta	0.957883955402058	6.30299870117722e-25	0.209377790651239	0.16746962653855
CNTN6	greenyellow	0.787175675636244	1.4286281352089e-10	-0.225523	0.136342910072204
KIAA1324L	green	0.894807555059851	1.1719183551938e-16	0.0307517268925185	0.841065173835135
LINC00511	yellow	0.908987932981688	6.02576406399893e-18	0.356852354256927	0.0161153690032385
RNF144A	green	0.956498649596006	1.24658686700547e-24	0.191937795737701	0.206550214275207
RNASE1	green	-0.90439	1.65866463076296e-17	-0.0603228	0.693854692408699
PELI2	green	0.948569097136469	4.21456318638722e-23	0.104044001518801	0.4964047183846
UTRN	blue	0.972363592729143	8.4795296692391e-29	0.124722527813436	0.414320060621854
ARMC3	black	0.925582249985023	9.41447030070935e-20	0.370385789000984	0.0122628894701541
HIST1H1E	red	0.791314935229412	9.79496398808484e-11	-0.0330339	0.829439236404085
LTBP1	green	0.817993705130353	6.89241003276725e-12	0.463476009583979	0.00134414236383144
EIF4G3	blue	0.954819074043703	2.76793717449254e-24	0.258097194848411	0.0869363507173784
JAK2	green	0.946380401137806	1.01006703279128e-22	0.207526707332244	0.171342766089653
KANTR	magenta	0.978561002404127	3.83774362047867e-31	0.114709984213395	0.453058305213025
TRAPPC10	green	0.953681895252208	4.67005422735209e-24	0.118200709841029	0.439333911677958
SCN1A	greenyellow	0.788759347128263	1.23775496953852e-10	-0.389501	0.00817693314646458
FAF1	magenta	0.975518659015718	6.45739914911801e-30	0.199862353731487	0.188068072280211
ATP6AP2	purple	0.973223360172957	4.3348768755013e-29	-0.129952	0.39486484432186
SNRPB	purple	0.981624585993564	1.43691060783163e-32	-0.0412643	0.787826257693168
KLHL29	green	0.926192572163595	7.93577330219398e-20	-0.101962	0.505108361401228
FAM172A	blue	0.980094719170476	7.89923086430303e-32	0.198746607683594	0.190596502729826
CDK17	green	0.937699774510195	2.33070890790817e-21	0.2186620808491	0.148997268128658
POLA1	green	0.960439868193048	1.68284867828621e-25	0.188685723657802	0.214491190573531
TAF9	purple	0.968430202360393	1.42527804509629e-27	-0.224975	0.137324015807852
SIGLEC10	purple	0.696605479034564	1.0693780060339e-07	-0.488297	0.000666650629607819
SVBP	green	-0.945466	1.43952036420966e-22	-0.0793903	0.60417977449659
LRBA	blue	0.981259138689137	2.18644623492215e-32	0.117148064717525	0.443448126356323
C14orf119	purple	0.965804603237443	7.7360777897674e-27	-0.1348	0.37731431524939
SIK3	green	0.947286396513197	7.06613459193982e-23	0.171423999120653	0.260188125809694
STOML2	purple	0.972853663017297	5.79989876595589e-29	-0.150062	0.325160662047729
AFAP1L1	green	0.909532248992035	5.32618646210092e-18	0.361952473614085	0.0145577211879544
SMURF1	blue	0.95461778765437	3.03940374637255e-24	0.175793901252382	0.248049787971466
SPATA5	blue	0.93681389306862	3.1292897548147e-21	0.122942138435923	0.421066628306951
TMEM59	purple	0.968839446879477	1.08101830006999e-27	-0.0906037	0.553914524953875
RIC1	blue	0.946444989313827	9.84867194354952e-23	0.163299936241716	0.283792671076849
SYT8	green	-0.316257	0.0343041439615454	0.00998537078762118	0.948093957671654
EBF1	green	0.878921181796351	2.04612282474838e-15	0.30482437971204	0.0417482511038501
HES1	purple	0.896246048356587	8.8461748157824e-17	-0.127688	0.403222193212118
CALM2	purple	0.982085733302203	8.35773710039612e-33	-0.128775	0.399195049343249
IVNS1ABP	green	0.882406810608824	1.13204884537629e-15	0.10051307656829	0.511209711568509
RELL1	green	0.908479828342818	6.75678815121204e-18	0.227622715429705	0.132635442686581
SIPA1L2	green	0.886395576043441	5.6177227097536e-16	0.335328518464484	0.0243355617404398
MRPS7	purple	0.940106150231978	1.02378790501406e-21	-0.193127	0.203698227228789
PBX1	green	0.90555626016846	1.28932692990145e-17	0.390868922899392	0.00793609027439566
IER2	green	0.874835483867565	4.00309942381713e-15	0.116380687102396	0.446460716974701
MIR181A1HG	blue	0.87923828941395	1.94031749689577e-15	0.0193438678749979	0.899634739715378
PRICKLE1	green	0.882962838250724	1.02827450001555e-15	0.223200413420447	0.140534053771219
ING2	purple	0.911156118823948	3.66855145080158e-18	-0.0972052	0.525278653675607
IQGAP1	green	0.93714356630955	2.80572296646394e-21	0.122312894390107	0.42346586029571
EML1	brown	0.906743289722175	9.94346210357613e-18	0.224091183377444	0.13891565254358
SRSF7	green	0.912995656645752	2.38388866370755e-18	0.117068824903122	0.44375868834538
TSPAN18	green	0.872318463779616	5.98330101233695e-15	0.346481138936688	0.0197218332045682
C3orf14	green	-0.829126	1.99776877256532e-12	-0.281901	0.0606440258124618
SLCO3A1	green	0.917908072618803	7.18378051981021e-19	0.112460443250339	0.462024966526864
MYO1E	green	0.915083382355911	1.44458483310412e-18	0.343536398267826	0.0208618732703576
TANC2	green	0.919422104811167	4.88905548879371e-19	0.0639512849437468	0.676419598870959
ANAPC15	purple	0.962730497992393	4.77556129788077e-26	-0.241021	0.110727625544261
ARHGAP32	blue	0.906257921022383	1.1062473223041e-17	0.117293200019884	0.442879613095825
VAV3	green	0.906406593014571	1.07076087968025e-17	0.101335834445288	0.507740168991174
OSCAR	purple	0.854298919648882	8.46993246859443e-14	-0.170342	0.263255176959167
COL4A4	greenyellow	0.920709534059547	3.50362794142687e-19	-0.219846	0.146754525940362
NUDCD2	purple	0.947018678554966	7.85808238301502e-23	-0.162481	0.286248329857914
CADM1	green	0.878230247963311	2.29589362170497e-15	-0.0825035	0.5900277197578
C8orf34	greenyellow	0.89540029001855	1.0441990397469e-16	-0.0395679	0.796359346586196
EYA2	yellow	0.814333050196081	1.01697738554077e-11	0.526620160529765	0.000202323278120714
NHS	yellow	0.944063668325434	2.45022390363999e-22	0.483327966804592	0.000770398693416769
IGKC	purple	0.287649187688822	0.0553622005303025	0.187251342946121	0.218060296863319
CACNA2D2	greenyellow	0.801348837552904	3.78393302339035e-11	-0.319157	0.0326011841549527
BRAF	green	0.949468530552345	2.91026336624568e-23	0.0973489026637502	0.524663326875101
SMG6	magenta	0.964434707435234	1.77566834240274e-26	0.213605325171642	0.158862734826292
ADGRB3	blue	0.911982942633442	3.02590641856548e-18	-0.0503938	0.742345914060854
ATP8A1	blue	0.942759719497724	3.96897690568897e-22	-0.000134553	0.999300087212295
ICAM4	purple	0.763181070361232	1.09324054485481e-09	-0.0224369	0.883688917857545
TRAF3IP2-AS1	blue	0.930775888793782	2.09472957256137e-20	0.0891322165387156	0.560396644722636
MAST4	green	0.963279759919662	3.48953427358497e-26	0.188877476124987	0.214017158421499
SIPA1L1	blue	0.945711566606862	1.30973559899365e-22	0.0931627280460613	0.542727018049919
PSAP	green	0.979611348032444	1.3168729776644e-31	0.096993558294507	0.526185047227127
EGR3	purple	0.554647204371002	7.69660110981091e-05	0.363605288316601	0.0140812308847953
TSR3	purple	0.878230425910546	2.29582572575359e-15	-0.00819363	0.957398308335772
CACNA2D3	green	0.813180741949528	1.14743019166231e-11	-0.209611	0.166985395002834
SIK2	green	0.915968845170172	1.1635510605702e-18	0.168132504257128	0.269588514937696
MID1	blue	0.874982054424981	3.90946220694846e-15	0.318808053451415	0.0328023922461181
KANSL1	blue	0.954998081126744	2.546042828105e-24	0.181960914027607	0.231579390782356
NDUFB5	green	-0.98382	9.52382143521472e-34	-0.0607573	0.691758391448809
CACNB2	blue	0.882376998245862	1.1378841732706e-15	-0.0637849	0.677215306136335
NDUFC1	green	-0.967319	2.96573926010189e-27	-0.0635027	0.678566446628904
GDF15	purple	0.698253723237375	9.69150849099685e-08	0.0865414456280916	0.571894558105092
BCR	green	0.930684271942349	2.15315402924191e-20	0.26017403065592	0.0843380581161306
AFF1	blue	0.967229636226231	3.14209819247612e-27	0.190467032027567	0.210115662906938
PRDX3	purple	0.954718859857823	2.90007202440571e-24	-0.155721	0.307036872888576
PPIC	green	-0.966915	3.84710718712016e-27	-0.107021	0.484094375228933
GMDS	green	0.918912578997807	5.56970279588106e-19	0.307144447000572	0.0401396015518965
FAM135A	blue	0.946985198023989	7.96286402562026e-23	0.0768768961996961	0.615711316146546
AC007952.4	green	0.887441465341392	4.65468560304393e-16	0.0519987052001621	0.734435152748785
DPYSL3	green	0.753826773732949	2.26851691815042e-09	0.481831605043306	0.000804351030396038
NBPF15	green	0.912342410385027	2.78122569156113e-18	0.0910442635109971	0.551980845617409
CD163	greenyellow	0.740812531268973	5.94601325892791e-09	-0.261618	0.0825674394909816
CC2D2B	green	0.915063841053691	1.45145994868429e-18	0.283710981767613	0.058939087386307
ZC3H11A	green	-0.936458	3.51791223255255e-21	-0.126201	0.408765368656747
ZNF428	purple	0.919358906559058	4.96896973836868e-19	0.0618836546650997	0.686334905879154
NEDD4L	blue	0.904685980113096	1.55646985018468e-17	0.0994742366037438	0.515607462258878
PLEKHA7	green	0.933423255251179	9.30361516127381e-21	0.0975652293793657	0.523737999141424
NHSL1	blue	0.9333183882816	9.61363326510676e-21	0.197258452282942	0.194006302530937
PALD1	brown	0.873397278796524	5.04178348834128e-15	0.255089740068805	0.0908088845086423
SORBS2	green	0.918413006760784	6.32375082003951e-19	0.198033662020683	0.19222472025465
DNAJA1	purple	0.934234577358649	7.20650218148074e-21	-0.0882321	0.564379141238522
ROMO1	purple	0.981272877909678	2.15253338754574e-32	-0.0977473	0.52295997490685
RFX3-AS1	blue	0.965000584112568	1.26487713254183e-26	0.160314753591985	0.292806704080809
DDAH2	purple	0.952904764425401	6.6268487768058e-24	-0.0813198	0.595391166164938
SEC11C	purple	0.96402171763229	2.26661461491624e-26	-0.171716	0.259364828760505
RASD1	purple	0.703826890394815	6.91422095452939e-08	0.00281276131385668	0.985369507348771
HERC2	green	0.95446094335145	3.26829989486208e-24	0.227791183991283	0.132341241999808
STXBP6	brown	0.787109429964804	1.43718653390097e-10	-0.00960844	0.950050803014381
PIK3C2B	green	0.913528380506848	2.10038010118563e-18	0.269088481872623	0.0738671820488832
ATAD2B	magenta	0.954514923308128	3.1877319012891e-24	0.136924615294392	0.369769326954695
MVB12B	green	0.9388572041114	1.57562083112162e-21	0.0699005445541701	0.648195261850958
MCTP2	blue	0.887585633179798	4.53492076001892e-16	0.149991656629065	0.325391590239329
PLAC9	green	-0.779681	2.77143445118966e-10	0.0352330282514883	0.81826998412755
WDR27	green	0.957784630705932	6.62386132990603e-25	0.24159009638157	0.109861783044676
TUBA4A	purple	0.9521908690686	9.09245497235047e-24	-0.170493	0.262825944714364
VMA21	green	-0.941169	7.04232668208373e-22	-0.0185608	0.903678122624126
ARHGEF18	green	0.980048314558471	8.30095604068987e-32	0.0401698204458075	0.793329002780802
CFAP161	brown	0.820583795035304	5.20650266943388e-12	0.0358858408421965	0.81496116526262
JAZF1	blue	0.946038765441906	1.15388904930634e-22	0.127346313836091	0.404490843411242
HSP90AA1	purple	0.907767168992039	7.92507007884967e-18	-0.0441773	0.773230798920039
PAM	blue	0.952759810119551	7.06922900778071e-24	0.206096402463319	0.174379481103858
SRI	purple	0.945823301696251	1.25439227319015e-22	-0.13909	0.362174779253552
KDM6A	blue	0.950704066261983	1.73048606028645e-23	0.131636464380722	0.388712356893328
H2AFJ	purple	0.975460786075543	6.78977994254583e-30	-0.187314	0.217904290165276
SLC25A11	purple	0.973309910384715	4.04687257151712e-29	-0.0869525	0.570063195021543
DLGAP1	blue	0.866825867549857	1.39755589537486e-14	-0.0648665	0.672047630299358
TTC6	greenyellow	0.873938129408572	4.62435322292819e-15	0.177073349101089	0.244569411793111
FAM193A	green	0.955856339737101	1.69744132882503e-24	0.183834707103929	0.22672699780574
FLI1	green	0.945294296208077	1.53764887148421e-22	0.259210092156498	0.0855363830586466
ARHGAP29	green	0.94478669705582	1.86586943777313e-22	0.116794121561487	0.444836251263613
KIAA1109	green	0.924186477829869	1.38406067189652e-19	0.1450812364016	0.341659550579576
RFX3	blue	0.926382800583331	7.5219416189765e-20	0.220735034758064	0.145086173458325
PRELP	green	-0.704629	6.58190345427157e-08	-0.302769	0.0432171228229594
ATG7	blue	0.916711576356559	9.68664355071135e-19	0.0858518781920013	0.574972998313967
MTUS1	green	0.88513752127694	7.02663090085506e-16	0.183741196912119	0.226967481309555
GAB2	green	0.908665416989595	6.48052730590248e-18	-0.0858914	0.574796422295307
HAGHL	purple	0.878432837575349	2.21981470618663e-15	-0.0915047	0.54996302996199
EPB41L5	green	0.854719289619309	7.99496906129249e-14	-0.173091	0.255512279366323
FBXO6	green	-0.952328	8.55801373490076e-24	-0.16881	0.26763583602061
RSL24D1	purple	0.96041148039633	1.70851980083898e-25	-0.169505	0.265640555573062
CECR2	green	0.921349988657601	2.96222215620421e-19	-0.103985	0.496651261249793
SERF2	green	0.9788378297988	2.91013581025926e-31	0.109465086827221	0.474111267380931
FTO	green	0.933761242319273	8.36780248057221e-21	0.251250422888575	0.0959454572200869
SMAD1	green	0.901834213648283	2.84918422389692e-17	0.278354150038362	0.0640989035120158
JTB	purple	0.978692810202288	3.36557060892348e-31	-0.131701	0.388479311760581
FLT4	brown	0.941977784544785	5.27171756525754e-22	0.267809568378126	0.0753030166873823
DYRK1A	blue	0.947362085744713	6.85638375644088e-23	0.148915524323951	0.328914479455469
ASAP1	green	0.92802634711585	4.70694056502355e-20	0.240597792416718	0.111374108285683
LMNA	green	0.746671451625271	3.88096440513724e-09	-0.018164	0.90572786187929
RGS6	brown	0.609475953918864	8.84696305162784e-06	0.0250845947015874	0.870075180441799
IDO1	green	-0.0614162	0.688583955120198	0.244083665270403	0.106130557775175
SLC11A1	green	0.803967117281942	2.92613477626477e-11	-0.168304	0.269093458003484
PGRMC1	purple	0.940991824722334	7.49854428376546e-22	-0.0929377	0.543706424935724
CHRM3	blue	0.819623468351644	5.78017425743024e-12	-0.161673	0.288682508114257
PLCH1	green	0.841274589548718	4.65360261601999e-13	-0.0300102	0.844850093049974
SMURF2	green	0.938664744151203	1.68249772895548e-21	0.11858872736992	0.437822713906468
CTHRC1	purple	0.622151775742996	5.05711219475578e-06	0.464790134335519	0.00129684130579866
SERPINE1	brown	0.563062310613387	5.65991822148675e-05	0.164457562133523	0.280346424377779
RFX7	blue	0.965577553243568	8.89882190673871e-27	0.252503392433178	0.0942450488843467
POLR2G	purple	0.970317646609293	3.85845166740974e-28	-0.173252	0.25506266706182
PDE3B	green	0.883476441147836	9.40483434115063e-16	0.165992247811305	0.275820121379482
MET	green	0.866778637819065	1.40755744558617e-14	0.310874273179287	0.0376600137178375
ARHGEF10	green	0.909721335791736	5.10174795637341e-18	0.198029877483207	0.192233389575791
PGC	purple	0.358331504667837	0.0156497126804817	-0.319297	0.0325207149353736
UVRAG	green	0.945400294112268	1.47642046216241e-22	0.101717047674772	0.50613665738822
PSMA4	purple	0.982848287200455	3.30514548092099e-33	-0.147559	0.333389569024383
TBC1D22A	magenta	0.941243302536977	6.85800777943233e-22	0.200333478605948	0.187007640725497
SLIT2	greenyellow	0.896019828309467	9.24872217726479e-17	-0.0200685	0.89589549327274
AKR7A2	purple	0.966800539952357	4.13843624046006e-27	-0.0542597	0.72333615913904
ANKS1B	green	0.95085871862849	1.61995068190659e-23	0.0607416034947273	0.691834144671356
SNU13	purple	0.968785349489736	1.12149139255098e-27	-0.13396	0.380320920577387
MOCOS	green	0.912762232504467	2.51923920138291e-18	0.12538854095943	0.411812228716408
CCDC3	yellow	0.835282435220733	9.68898687857219e-13	0.527635902552762	0.000195645412010069
NRCAM	green	0.886374965050502	5.63847575800857e-16	0.0466088400187079	0.761106164927996
PHLDB2	green	0.892755379854128	1.73831283436792e-16	0.00914870170597471	0.952437937856075
CEP85L	green	0.925686953162513	9.14345687438285e-20	0.181300132310871	0.233307398647149
IMP3	purple	0.96344117690573	3.17928712970851e-26	-0.146487	0.33695283832068
NUAK1	green	0.796409764523589	6.08317456625513e-11	0.231404599981072	0.126147812303555
ADARB1	green	0.93912563426139	1.43728606436472e-21	0.182388661734836	0.230465475559445
SAMHD1	green	0.9200532507702	4.15515528119416e-19	0.0549083428198088	0.720162392101259
ZFYVE9	magenta	0.972503786015276	7.61182875900223e-29	0.102161807567622	0.504269100658261
IL1RL1	green	0.176299473646562	0.246670547875472	-0.516887	0.000277599628092379
KCNT2	greenyellow	0.90052484079589	3.73773625609989e-17	-0.0247826	0.871626430354309
POLE4	purple	0.9714100881926	1.74174405345593e-28	-0.0642489	0.674996917530539
LGALS3	green	0.951078585865118	1.47430673897292e-23	0.0464163216964268	0.762064108036305
BAZ1A	green	0.929795260263305	2.80649017338738e-20	0.0859127372019867	0.57470100119624
KDELR2	purple	0.964482384251126	1.72600687160197e-26	-0.151279	0.321207940108928
NECAB1	greenyellow	0.440006847953059	0.00249012990735505	-0.671992	4.31845723717931e-07
HECTD4	magenta	0.965698798583156	8.25866410900982e-27	0.195028007467787	0.199197425523228
CDA	black	0.656393341711818	9.7925343594821e-07	0.0322215191791212	0.833573600153296
MRPS15	purple	0.975442613985701	6.89746586842361e-30	-0.239984	0.112317432179336
PLEKHM3	green	0.956529481429197	1.22810678522358e-24	0.0278264678602713	0.856016061471246
BIRC6	magenta	0.944495340672905	2.08330320145062e-22	0.170587833044755	0.262555178115556
SHROOM2	green	0.942770887093504	3.95280564630781e-22	0.117811987656186	0.44085074641039
LRP6	magenta	0.961737003428808	8.3247228310316e-26	0.148642229563996	0.329812935705801
SNRPD1	purple	0.976460803224572	2.80332366936699e-30	-0.136955	0.369662884248871
ATP9B	magenta	0.953344011923454	5.4415234166659e-24	0.0989157690508606	0.517979440815827
SMIM3	green	-0.883382	9.56033946088945e-16	-0.159048	0.296686106366517
KLHL3	green	0.881529928578732	1.3161085433214e-15	0.353089689936238	0.0173531387228065
HIVEP1	green	0.947105736960008	7.59172509149291e-23	0.239303855810645	0.113369878460858
ABI3BP	blue	0.888549884712835	3.8058772627005e-16	0.183651062787545	0.227199448467466
NEO1	green	0.915233153611922	1.39290875832973e-18	0.240941062396175	0.110849163864685
FAM189A1	brown	0.857465968349408	5.45884278678476e-14	0.152029379909878	0.318785913520804
ATXN7L1	blue	0.945946358733961	1.19601652149531e-22	0.226816275475657	0.134050517562332
ARMCX4	blue	0.955814268331105	1.73183647171216e-24	0.162593605866975	0.285908946445743
HIF3A	green	0.804584195360567	2.75256480855886e-11	-0.133966	0.38029698618342
SLC39A1	purple	0.947303569808297	7.018015238297e-23	-0.0315031	0.837233813310835
PDGFB	brown	0.824416063352403	3.40941890494288e-12	0.384118565355364	0.00918696156138611
TM4SF19	purple	0.744151009300667	4.66935502183246e-09	0.0736458018133433	0.630670936081703
ETV6	green	0.952550723824674	7.75709317184616e-24	0.241794206898514	0.10955265780867
HTATIP2	green	-0.95302	6.29497844490811e-24	-0.227227	0.133327831501121
PPFIBP1	green	0.954968334612622	2.58170427304803e-24	0.121608610661144	0.426160338816278
STAG1	magenta	0.982649093156161	4.22816742932311e-33	0.133769566561551	0.381003677509487
SSR2	purple	0.986509434219504	1.96296061254673e-35	-0.101548	0.506846348229285
CRIM1	green	0.91599714599797	1.1554878923202e-18	0.263800714016328	0.079946544158453
AREG	green	0.632672746466819	3.11900668088714e-06	-0.030634	0.84166591606355
OSMR-AS1	green	0.958885000414243	3.79552216700817e-25	0.143810287806777	0.345950505495948
GLA	green	-0.958117	5.60765112537172e-25	-0.189834	0.211664508469138
GLMP	purple	0.847005207951425	2.24224004685515e-13	-0.106537	0.48608494664212
ROPN1L	green	-0.886997	5.04310761950757e-16	-0.00937516	0.951262017459132
SF1	green	0.880272596888851	1.63008775292023e-15	0.00660759755857997	0.965639175469186
FBXW8	magenta	0.960099140591845	2.01672182138032e-25	0.126867107980241	0.406275926774911
ARHGEF11	magenta	0.957404325709937	8.00206184000609e-25	0.124223084077461	0.416206388934337
TRAPPC2L	purple	0.962767477006652	4.67643930645037e-26	-0.157631	0.301066169715952
TSPYL1	purple	0.860714594442717	3.4402614256161e-14	0.0484681926373233	0.751872669702256
PNRC1	purple	0.920169772449751	4.03164907455562e-19	-0.0571323	0.709316086376302
COL4A5	green	0.897512744735654	6.88196743368134e-17	0.282361586802191	0.0602063964069407
P3H2	green	0.90500882530528	1.45176283713114e-17	-0.097792	0.522768663142866
COX7A2	purple	0.951328324546512	1.32399484589378e-23	-0.101004	0.509137607733817
DAPK2	greenyellow	0.899092474809721	5.00858041293272e-17	-0.123775	0.41790110155912
UBE2L6	purple	0.921183574208557	3.09470407026206e-19	-0.0301091	0.844344953838957
CXCL17	purple	0.78877409019027	1.23609646630731e-10	0.0297196734683976	0.846333930093608
CAMK2D	blue	0.955035400934133	2.50196478357926e-24	0.126447	0.407843739444537
BAX	purple	0.940738915787811	8.19984160875518e-22	-0.0807093	0.598165827357649
RRS1	purple	0.918636572544172	5.97504503907186e-19	-0.14425	0.34446355333299
HSPA6	purple	0.754780416511633	2.10895208812795e-09	-0.0741692	0.628237515032111
BRI3	green	0.94406667339669	2.44746927143695e-22	0.0350792316445611	0.819049968212335
GBE1	blue	0.912459710533821	2.70553277082167e-18	0.0402760723460573	0.792794351651327
AC058791.1	purple	0.779382982946791	2.84396682598249e-10	-0.17243	0.257358474774461
BCAS2	purple	0.917671807575049	7.6233084785509e-19	-0.22173	0.143235870838876
CALM1	purple	0.971620804095658	1.48873992782954e-28	-0.131786	0.388168126904003
ECSCR	green	0.961393626289522	1.00531840043532e-25	0.228383568232289	0.131310617942254
MRPL50	green	-0.936276	3.73504514692217e-21	-0.0296609	0.846633958334519
DUOXA1	greenyellow	0.87679535076693	2.90985318246469e-15	-0.0884658	0.563343931074134
UCP2	purple	0.928126601897445	4.5726115955894e-20	-0.0642795	0.674850461660872
POGZ	brown	0.89220996923918	1.9277652328604e-16	0.133990250124761	0.380211366711807
STXBP5	blue	0.953501989632239	5.06684006756276e-24	0.138356635829565	0.364736491541771
HDAC8	magenta	0.946193314413668	1.0865680381101e-22	0.143187981078176	0.348063550485684
CDKL5	green	0.883311736059982	9.67832057620208e-16	-0.0227714	0.881967400438579
GFER	purple	0.964516880441117	1.69090213593866e-26	-0.134763	0.377444858929509
GTF3A	purple	0.975704439154725	5.49197982873158e-30	-0.0894519	0.558985318572577
COBL	green	0.844351640156135	3.15572326221681e-13	-0.0397827	0.795277542665022
NCOA2	blue	0.96591172535242	7.23914481801404e-27	0.175133737082459	0.249858588756007
BTRC	blue	0.929660628971259	2.92052416689832e-20	0.254607616307893	0.091441941764486
NSMCE3	purple	0.887011004958845	5.03037779525325e-16	-0.00892811	0.95358349814704
WDR7	blue	0.954911902785236	2.65066729215455e-24	0.0543004019621417	0.723136970060739
ESYT3	green	0.736992135597543	7.80576306943838e-09	-0.256473	0.0890118346108288
TMEM141	purple	0.964528285599193	1.67944604515451e-26	-0.0976649	0.523311734226853
GLI3	green	0.929611675945001	2.96306881709798e-20	0.247741931659171	0.100832950197042
FNBP1L	green	0.91946548040761	4.83491497930204e-19	0.239936385296083	0.112390895717039
ACADL	greenyellow	0.778552665548744	3.05543952365448e-10	-0.423693	0.00372900528196116
SNRPC	purple	0.965629952238868	8.61657259072865e-27	-0.118625	0.437682679927794
CH25H	purple	0.669463510346115	4.94746652622922e-07	0.134707683358074	0.377642353571437
AQP9	purple	0.70555925450825	6.21548837947952e-08	-0.371547	0.0119724596642211
SIPA1L3	green	0.947063449380623	7.72001408846329e-23	0.108151679495277	0.47946324093501
PCSK5	green	0.905337527006198	1.35204436465293e-17	0.171445311986766	0.260127979294134
PGLS	green	-0.955535	1.97770193782116e-24	-0.0812112	0.595884359647564
LMO7	greenyellow	0.852763609274545	1.04413679341157e-13	-0.0956105	0.532128390381835
CEBPD	green	0.796607743420592	5.96999639694557e-11	0.14488710776103	0.342312829624018
SUPT3H	blue	0.894406841024068	1.26650819777482e-16	0.0283030002112667	0.853576977685136
THRB	blue	0.965819046506159	7.667231192886e-27	0.137927279621247	0.366241111429293
PBDC1	purple	0.965066638605298	1.21533183733766e-26	-0.160886	0.291067850260741
COL8A1	greenyellow	0.88995090675291	2.94177975241113e-16	-0.0517606	0.735607182962446
SFMBT2	green	0.876041250908335	3.29191175253037e-15	0.161308241363622	0.28978642387707
PRKCH	green	0.935500540641677	4.80598113475073e-21	0.172638056734688	0.256776753900779
SARAF	purple	0.953022496549177	6.28705882395788e-24	-0.118593	0.437805634229367
ZNF438	blue	0.912502165791219	2.67862189518558e-18	0.0879722252992207	0.565531347109835
NOD1	green	0.943519646285201	3.00057258089107e-22	0.184853746265239	0.224117659512672
BTG1	green	0.933153929448987	1.01196735743667e-20	0.0302384086090009	0.843684881735806
ARHGEF28	green	0.910634128832793	4.13884797315152e-18	0.107124401380788	0.483671329123395
CPNE8	green	0.918796461927532	5.73694271331295e-19	0.193715430347346	0.202297673892069
PMVK	purple	0.944888982640676	1.79479017210208e-22	-0.151187	0.321506255020536
MAP4K3	blue	0.959849643334206	2.30021673697858e-25	0.137034385382013	0.369382073451005
GAREM1	blue	0.892771212479849	1.7330862524993e-16	-0.0942297	0.53809468770857
MSRB3	green	0.891518807978281	2.19604880675074e-16	0.17384558133923	0.253413578649739
MYO10	green	0.93532915581744	5.07935548827737e-21	0.143515641895825	0.34694999224059
LINC01290	greenyellow	0.791507364697427	9.62261993658979e-11	-0.267926	0.0751710192492123
S100A10	green	0.929876479775157	2.73975619374058e-20	0.0349198245662639	0.81985858829183
ST5	green	0.906426117962611	1.06618154099935e-17	0.250829390624787	0.0965221266106802
GHR	green	0.967208542568444	3.18520204387309e-27	0.0848167416962693	0.579608299690225
SCLT1	blue	0.916725286113209	9.65376766897364e-19	0.174941485482602	0.250387010661891
PDLIM4	purple	0.605696029512711	1.04041219468444e-05	0.471147134942831	0.00108830083159864
DST	green	0.917723307859569	7.52537866251517e-19	0.131702690226631	0.388471658854142
SYNE2	green	0.954327049447422	3.47659040655063e-24	0.226292494289351	0.134975619943074
SKP1	green	-0.958013	5.90694313270077e-25	-0.175834	0.247939050716226
UST	blue	0.918139850699575	6.77605845129308e-19	0.0891508408163219	0.56031438239603
ODC1	purple	0.895336343667611	1.05731447452518e-16	-0.225938	0.135605089656131
CDC14A	green	0.929584188987596	2.98721498015614e-20	0.194354777771248	0.200783353840265
PSMB5	purple	0.970861768161051	2.60617634571834e-28	-0.0754226	0.622426
SCARA5	green	-0.531544	0.000171773259187369	0.101353844472071	0.507664354891892
CLIC3	purple	0.644249866631417	1.79408768026678e-06	-0.363974	0.0139766412030929
NDUFS7	purple	0.978074103304748	6.1897216835493e-31	-0.143479	0.347074852300418
CHL1	yellow	0.911845785799718	3.12454350346358e-18	0.409087907949196	0.00526638799242502
MLLT3	blue	0.94660462645496	9.25122910807237e-23	0.154741187802343	0.31012741424576
USP25	green	0.921524739855628	2.82891018035285e-19	0.0531241348868312	0.728903733323968
FOXO1	green	0.939775446959093	1.1486233413589e-21	0.286121007451789	0.0567288721138732
MON2	magenta	0.962562709152273	5.25098733460272e-26	0.13029272162902	0.393615088135764
FOCAD	blue	0.948239660350119	4.81876930330011e-23	0.231419997174907	0.126121895708921
ZCRB1	green	-0.969353	7.60192929048314e-28	-0.11017	0.471251831116997
USP6NL	blue	0.914620824832719	1.61592018417183e-18	0.03684650281766	0.810097793661175
NFIB	blue	0.918402033489079	6.34135441331293e-19	0.391195327888587	0.00787953103994345
ZBTB46	green	0.917884884621668	7.22582855481484e-19	0.305968099182125	0.0409487818245814
FLRT2	green	0.724597791487349	1.82946599787784e-08	0.501368076149079	0.000450893336694491
PSMA2	purple	0.959033709303588	3.51627473094752e-25	-0.140201	0.358315328441815
GRIP1	yellow	0.843309500299813	3.60275855526215e-13	0.17773582096414	0.242780399918018
TMEM176B	green	-0.761339	1.2655383837534e-09	0.156156334111068	0.305669075336104
HPGD	purple	0.329371117951747	0.0271490717729351	-0.197119	0.194328154919042
TLN2	green	0.94061460482032	8.56698785105457e-22	0.145412163558417	0.340547694524084
FGFR2	greenyellow	0.881078939429425	1.42148046785181e-15	0.210200257106815	0.165769236844553
PTBP2	blue	0.946189400119185	1.08822599568073e-22	0.184211982332943	0.225758526264453
MPDZ	green	0.921040337039566	3.21322262194661e-19	0.262039716885806	0.0820559803656762
SRGN	green	0.919687745167547	4.56630585935198e-19	0.0751774620519927	0.62356081976989
TAGLN2	purple	0.949085454810678	3.41022273353829e-23	0.0150675935644806	0.921743565151239
ZFAND5	green	0.860746005493643	3.42474456852017e-14	-0.0624288	0.683715694485783
MID1IP1	purple	0.879610277872404	1.82280747807512e-15	-0.386024	0.008817695214365
HSPG2	yellow	0.824541807542637	3.36180470632395e-12	0.360802559123192	0.0148972585198267
PSMD8	purple	0.984348683050082	4.68655897876877e-34	-0.135541	0.374670326599557
CPEB3	green	0.931538082049902	1.66378292370157e-20	0.170599347070322	0.262522486673012
ARC	purple	0.740486624494079	6.08678528311655e-09	0.00552761766228441	0.971252712305873
FBXW11	green	0.967995324107672	1.90444110847671e-27	0.175909920426581	0.247732819569993
TUBA1C	purple	0.975466031381254	6.75899582917052e-30	-0.11311	0.45942517964817
LAMA4	green	0.830921638605739	1.62249814473286e-12	0.219821685301677	0.14679995855151
CDH13	blue	0.929743237675501	2.85004290551523e-20	0.0644600351228752	0.673988086286984
COX17	green	-0.959622	2.59221592654537e-25	-0.131961	0.387533186900305
FAM189A2	green	0.936026163333197	4.05211392378815e-21	0.0488782674158719	0.749840801966079
GCSH	green	-0.936021	4.05893262441316e-21	-0.0922887	0.546535809167867
MYO5B	green	0.835415482520307	9.53553801768039e-13	-0.024971	0.870658424251382
SYN3	green	0.92868127085928	3.89282772783771e-20	-0.0596012	0.697341015284814
EEF1D	purple	0.980690668624382	4.13351697814727e-32	-0.1388	0.363188100316341
PPM1L	blue	0.923883588553695	1.50331627563093e-19	0.0235347997186383	0.878039692082283
GALNT15	yellow	0.745536768767752	4.21903422252066e-09	0.193554777903747	0.202679444427124
FAT1	green	0.86523818738878	1.77351582950497e-14	0.278157514999093	0.0642949379544639
MEF2C-AS1	green	0.923213711830429	1.80265639787214e-19	0.304338525778048	0.0420917014585657
LINC00486	brown	0.856564472918418	6.19253487841388e-14	0.124642642702775	0.414621447228001
KLF4	green	0.86702040552714	1.35706461170748e-14	-0.0454191	0.767031767627563
EIF3F	purple	0.955612346843912	1.90635169631594e-24	-0.189575	0.212299660709195
MSLN	purple	0.470467173426594	0.0011090794728491	-0.258589	0.086315819888889
LRRC75A	green	-0.835978	8.91180418578349e-13	0.0210196049309884	0.890990507931622
CISD2	purple	0.955925402500933	1.64238478227094e-24	-0.10228	0.503771630234063
JAGN1	green	-0.954797	2.79679121836704e-24	-0.0691905	0.651539346873777
FPR3	purple	0.811276622715568	1.39815624456428e-11	-0.063442	0.678856947176031
JAM3	green	0.902959785929644	2.24932157528477e-17	0.235734492336565	0.119016144889892
PODXL	green	0.8606959164038	3.44951977156382e-14	0.221318295651407	0.143999519315637
SENP7	green	0.952550729624755	7.75707323587556e-24	0.186349923389808	0.220324212320444
FGF13	yellow	0.925939390381677	8.52019632675082e-20	0.39147067788556	0.00783208966471344
WRN	blue	0.946506703109648	9.61348301885919e-23	0.0968616546780338	0.526750462020724
SAMD12-AS1	green	0.951797457729092	1.08016621370558e-23	0.1228015672458	0.421601940765954
SHROOM3	greenyellow	0.927044622473319	6.23620393395582e-20	-0.0305013	0.842343008894733
GCNT2	green	0.827930596593563	2.29151869384847e-12	-0.0583691	0.703308369784303
CLU	purple	0.822711472770851	4.12102973322717e-12	0.26960195612599	0.0732968151880909
USP13	green	0.885535584320413	6.54815250289589e-16	0.0648102955912982	0.672315962488565
SEMA5A	greenyellow	0.885122108872012	7.04580725379105e-16	-0.0127957	0.933514397934795
ARHGAP42	blue	0.896417206742207	8.55270941894477e-17	0.0826207857093593	0.589497267936042
DUOX1	green	0.658429813063206	8.82348518917121e-07	-0.191764	0.206970316358038
WDFY3	blue	0.972327023962015	8.72089976871286e-29	0.132165590628078	0.386791692153124
FIS1	purple	0.974334739311914	1.7617255515875e-29	-0.0274509	0.857939413631995
CBLB	blue	0.906081762758825	1.14973921979872e-17	0.268646031772466	0.0743614573006004
COL12A1	green	0.706549147334841	5.84640527548291e-08	-0.221098	0.144408334072892
RNGTT	blue	0.939324278573091	1.34243458958373e-21	0.0666777375813076	0.663427436922363
MRPS36	green	-0.95905	3.48712902951539e-25	-0.135284	0.375587788925052
DGKD	green	0.881453894164318	1.3333389095528e-15	-0.16791	0.270232875835672
PLA2G4F	greenyellow	0.619706833055943	5.64394649691632e-06	-0.466523	0.00123671819456907
RAB11FIP1	green	0.775154888010589	4.0847572535975e-10	-0.245505	0.104047045635688
DCTN6	purple	0.953616361578482	4.8110381230037e-24	-0.242311	0.108773211855615
CACNA2D1	blue	0.904330774839575	1.67993830640999e-17	0.0427906863645358	0.780168947016679
NEGR1	magenta	0.813849200850782	1.06995137468542e-11	-0.0577363	0.70637982418746
LCK	purple	0.834108679090231	1.11475355436782e-12	-0.205659	0.175314768649622
TYMP	brown	0.920421414988706	3.77671195271507e-19	0.0955599733811453	0.532346214182187
PCDH9	blue	0.842438741571917	4.02152400535363e-13	0.068241873530906	0.656017510244487
RELN	green	0.889336133230437	3.29513022120391e-16	0.270471171870118	0.0723392162160267
ANAPC13	green	-0.945665	1.33335157105828e-22	-0.0840349	0.583120343555376
LMTK2	green	0.922664021458398	2.0897497131935e-19	-0.0305365	0.842163320946729
RARRES2	purple	0.866401110000022	1.48997521890054e-14	-0.117082	0.443705742254896
ZNF532	green	0.928182457669373	4.4993600441595e-20	0.293864561635503	0.0500739786057561
ARHGEF3	green	0.898100405773954	6.11843990892515e-17	0.25372772660204	0.0926061035753582
MRPL10	purple	0.823419299561275	3.81001693799607e-12	-0.0331169	0.829016863072974
COPZ1	purple	0.970157891130848	4.32358953711605e-28	-0.172327	0.257648665753754
NLK	green	0.946994973291478	7.93213451087786e-23	0.296345922113173	0.0480803028117375
CCDC124	purple	0.932585966839017	1.20690778401659e-20	-0.172278	0.257786109172867
RPS6KC1	blue	0.946377001946522	1.01141010980276e-22	0.108195971699874	0.479282239112355
VCAM1	purple	0.250064630861315	0.0975764207793572	0.602527384822739	1.18997486071737e-05
PRKCA	green	0.91101137504194	3.79361037276591e-18	-0.0312784	0.838378915386877
NEU1	purple	0.952900802049653	6.63858316726873e-24	-0.161813	0.288259731243128
MOSPD3	purple	0.899879934586824	4.26651723435889e-17	-0.0221556	0.885137475670616
TBC1D32	green	0.957096030481846	9.31540655325132e-25	0.136582041865151	0.370979442150216
PRDX6	green	-0.93915	1.42517439263878e-21	-0.249367	0.0985452039772128
EIF3I	purple	0.956935398233714	1.00785588720868e-24	-0.130856	0.391555629082623
SMAD3	green	0.903195777398121	2.13976917736101e-17	0.309298139068391	0.0386920394640765
FBXW7	blue	0.942090041932342	5.06244072496715e-22	0.160085888287878	0.293505350702658
MGAT5	blue	0.945966997396557	1.18648255163555e-22	0.210090355018393	0.165995723356592
NDUFA11	purple	0.977255999756614	1.34961258473991e-30	-0.219509	0.147390483868353
CDRT4	green	0.983102083578687	2.40480784174744e-33	0.183452160276117	0.227711916217538
RANBP1	purple	0.975621307549103	5.90562868623281e-30	-0.156232	0.305431721986163
HERC3	green	0.841355063751392	4.60705172638991e-13	0.0188043878529908	0.902420123155131
NDUFB1	purple	0.975868399745023	4.75561698100194e-30	-0.140061	0.358798973054895
TUSC2	purple	0.950242981718181	2.10421978332162e-23	-0.130053	0.39449509020202
PDE1A	yellow	0.891358265595245	2.26324514475873e-16	0.429016179352304	0.00327570056219855
SOX6	blue	0.934248030742113	7.17584796792939e-21	0.0802521765340515	0.6002470372723
SPAG6	purple	0.608406239313468	9.26429800260603e-06	0.134007001578121	0.380151264592718
HMBOX1	blue	0.942570000562657	4.25350109380032e-22	0.155892875418163	0.306495965409569
CAMK1D	green	0.911200070377651	3.63135847797053e-18	0.312497690292759	0.036620752619829
NQO1	green	-0.872639	5.68758298233234e-15	-0.261025	0.0832908867783098
PPP1R11	green	-0.92719	5.98241324704743e-20	-0.031289	0.838325037776333
CHMP1B	green	-0.940918	7.69625620470047e-22	-0.111351	0.4664837757061
WDR70	magenta	0.969099859054094	9.04889926128608e-28	0.163867268302873	0.28210028448719
ITGA6	green	0.897268239376717	7.22555157920285e-17	0.334283206499229	0.0248108014055218
RABGAP1	blue	0.948818590124504	3.8056905924798e-23	0.157636473682691	0.301050073285068
BST2	purple	0.876844219397762	2.88660264040184e-15	0.102089814134347	0.504571164660919
ANKRD36B	green	0.915930580233004	1.17453807611635e-18	0.158005410531848	0.29990576966903
TNFAIP3	green	0.853412048705022	9.56094819671821e-14	0.0249049916416965	0.870997538270513
DIAPH2	green	0.96203633276249	7.05233674462778e-26	0.0171229113534266	0.91110902457844
CNKSR3	yellow	0.813997654202604	1.05342751518445e-11	0.462863420640227	0.00136671187820977
PLCL2	green	0.921394020272893	2.92808055923811e-19	0.141837566972547	0.352676036710698
SMAD9	green	0.903196349474372	2.13950986529479e-17	0.290100542074675	0.0532253107540502
HEXIM1	purple	0.920462635770087	3.7364394708261e-19	0.038503400649178	0.801726407294022
ZFAND3	blue	0.965712326716564	8.19002011278329e-27	0.126178089392877	0.40885051501186
ECE1	green	0.856747968983842	6.03602259883632e-14	0.358974056490219	0.0154510143618013
NDUFB6	purple	0.965244905641333	1.09067291756149e-26	-0.13418	0.379532240679198
ACAD11	magenta	0.948697732015377	3.99880193931861e-23	0.0661283116534892	0.666037884640083
CHRM2	brown	0.357436659334229	0.0159300374566946	-0.26645	0.0768530307420257
DNAH14	green	0.909895137586634	4.90339477231232e-18	0.0597007705166271	0.696859693940397
VTI1A	blue	0.946649009186576	9.09135167279324e-23	0.069925729573151	0.648076775465273
GNAQ	blue	0.919850176279081	4.37903542298013e-19	0.214401535791684	0.15727853662019
TMEM50A	green	-0.974154	2.04553475470362e-29	-0.104809	0.493226937780859
RPS2	purple	0.918502407806157	6.18205057195353e-19	-0.272024	0.0706528049854665
KLK11	black	0.811616784056061	1.34987518354924e-11	0.11350011571719	0.457869010407384
ZNF593	purple	0.931983408106414	1.45250250728523e-20	-0.169148	0.266663658962223
VCAN	blue	0.887342812039341	4.73836114189695e-16	0.0148068542839915	0.923093675569194
PFN2	purple	0.831523764216687	1.5123332685525e-12	0.0554452059603802	0.717538980001993
NTN1	yellow	0.943164738912762	3.42092795392415e-22	0.444158473970956	0.00223981730353905
PLD1	blue	0.890740656841901	2.54037261201024e-16	0.150869219426577	0.322536344379278
VWA8	blue	0.95551701547471	1.99444178721323e-24	0.11538502641164	0.450386200105132
NDUFA3	purple	0.961305823741571	1.05471520093903e-25	-0.0787229	0.607232443906506
ZNF704	green	0.908350841417472	6.95533783077071e-18	0.114131146995512	0.45535644797698
CLEC1A	green	0.870936643006174	7.4337176113313e-15	0.274395695182834	0.0681380223102136
EPHA4	green	0.914338390687672	1.72984207413114e-18	0.254660623322646	0.0913721734464256
SUB1	purple	0.966177424826448	6.13438222705838e-27	-0.11089	0.468339703372421
AMBRA1	magenta	0.94926684752582	3.1640790746422e-23	0.0328667434294428	0.83028943076735
ARL6IP5	green	-0.960072	2.0453786183324e-25	-0.198519	0.191114257028319
AC147651.4	purple	0.866230533803119	1.52869327792331e-14	-0.128708	0.399443383189017
ZBTB7C	green	0.902135642080573	2.67514641346724e-17	0.281454675687256	0.0610703144125818
REV3L	magenta	0.934666024669121	6.28287143317995e-21	0.139733412157687	0.359936948341798
ZXDC	green	0.95273798975409	7.13820670802307e-24	0.087304196538635	0.56849823508577
FGD6	green	0.908072195745143	7.40332258138163e-18	0.333429867309713	0.0252044873341538
CD99	green	0.82677647248412	2.61344722489946e-12	0.0386746838379979	0.800862242142983
ARPC5	purple	0.95643275852077	1.28697177710894e-24	-0.236003	0.118583503727504
NOSTRIN	green	0.921071888685558	3.18675145698643e-19	0.151647545793228	0.32001720920529
CACNB4	blue	0.925009351687647	1.10377342715219e-19	-0.034839	0.820268833216203
NRG1	green	0.869697592222798	9.01192013333062e-15	-0.0616692	0.687366310112782
GULP1	blue	0.90812607134268	7.31462434890069e-18	0.220178550076851	0.146128578043396
ZNF718	green	0.96281061357327	4.5632864704865e-26	0.155947090170041	0.306325690551058
MKLN1	green	0.942155841367925	4.94347128014412e-22	0.135917902686907	0.373332208179323
IGFBP5	purple	0.768926963815076	6.86631921031086e-10	0.0848893590614569	0.579282571064436
MTHFD2	purple	0.927395426298588	5.6423159786765e-20	-0.150865	0.322549911785137
TMEM179B	purple	0.941804089436132	5.61181727567128e-22	-0.137291	0.368476366059706
PCED1B	green	0.89414676569033	1.33172641016102e-16	0.0623078283839494	0.684296466572765
PDXK	green	0.919565930309871	4.71171319152388e-19	0.0446417426655945	0.770910548268605
SLC1A1	green	0.940212046518612	9.86619092580066e-22	-0.0178843	0.907173498064648
LMO3	greenyellow	0.946441669380081	9.86147793951056e-23	-0.0205568	0.893376694367198
ARFGEF3	blue	0.867409439079084	1.27939821643824e-14	0.129699004954542	0.395792753869881
CFAP53	purple	0.810620914710621	1.49585414501753e-11	0.143710544765912	0.346288651767981
SORCS2	green	0.879345361069814	1.90577826941884e-15	0.287767209942276	0.0552577623470087
ITIH2	red	0.984050942878162	7.00708003689364e-34	0.0446500051372232	0.770869291443321
HMGB3	purple	0.779293078572515	2.86618167012377e-10	0.202979379295018	0.181131196337936
FIBP	purple	0.979472872099019	1.52108085449728e-31	-0.0928741	0.543983343538816
MPP7	green	0.903530591280507	1.99299541128956e-17	0.0463950825894682	0.762169812306753
RIN2	brown	0.879331649751176	1.91016852657567e-15	0.156431326926877	0.304807507896576
EYA1	yellow	0.6691759984979	5.02415644501057e-07	0.380538281492211	0.00991674123339773
PREX1	brown	0.867005149744075	1.36019939011371e-14	0.114733522627203	0.452964985099843
TAGLN	purple	0.893291307288135	1.56944833360057e-16	-0.220091	0.146293162653652
CHPF	purple	0.874380767098273	4.30730028106768e-15	-0.0456786	0.765738256617676
ANKHD1	green	0.951555590832871	1.19997837409752e-23	-0.0308512	0.840557579858488
MMP16	yellow	0.848124118731524	1.9375779608288e-13	0.593483874793206	1.73235622007051e-05
PHGDH	green	-0.734051	9.59476140930119e-09	-0.291543	0.0519995666492633
VWF	green	0.907632001510942	8.16726515826759e-18	0.275402399449355	0.0670921568506601
BCAR3	green	0.921882884334651	2.57328633848033e-19	0.0832105248188944	0.586834155612181
MIR646HG	green	0.82941276497493	1.93278945509079e-12	-0.0568882	0.710503835757628
ADI1	green	-0.956334	1.34959028457808e-24	-0.211192	0.163735845354633
TGFBR3	green	0.926343911886621	7.60483784867039e-20	0.297867464237335	0.0468899561004505
SGK1	green	0.847122892293711	2.20818367501905e-13	0.0654651673068331	0.669193837819228
SURF1	purple	0.953221553611689	5.74994718782025e-24	-0.159013	0.296795609366784
EMCN	green	0.889992846706771	2.91903197921071e-16	0.311321870876806	0.0373710882774149
TVP23C	green	0.92595150188478	8.49133205061421e-20	0.159934154271459	0.293969136393314
RAB34	purple	0.956955538866785	9.97970929919708e-25	-0.133945	0.380372590181167
RAB3C	yellow	0.754506514986681	2.15366922955474e-09	0.57176571052297	4.08215974111557e-05
SCTR	greenyellow	0.742895433195032	5.1159046126132e-09	-0.0655213	0.668926492811838
RAPGEF1	green	0.92041948631717	3.77860631340959e-19	0.107610839338965	0.481676304418005
PTPN21	green	0.921949425609658	2.52827666550514e-19	0.00161561081838823	0.991596144908068
LAMA5	brown	0.934837950359151	5.94714532891932e-21	0.116684667632817	0.445266000583968
RAI1	green	0.927357286268292	5.70418111019505e-20	0.30597227844633	0.0409458835945732
DDIT4	purple	0.852210103522852	1.12530148063125e-13	-0.0716585	0.639945541296914
DLC1	green	0.921638370066311	2.74530431429819e-19	0.0405566911119442	0.791382752638241
CELSR1	green	0.853252955923431	9.77021256028663e-14	0.216577738750561	0.153007570410142
ASB3	magenta	0.957799385195495	6.57523403938903e-25	0.101625828898862	0.506520120327431
ACACB	green	0.907948799791101	7.61033780484835e-18	0.20205783440796	0.183162710910022
LIMS2	green	0.874990187354586	3.90432767920037e-15	0.0195658942291572	0.89848874221419
MBOAT2	green	0.861047432761909	3.2791706420252e-14	0.231253949448797	0.126401598758089
LCLAT1	green	0.951232823069012	1.37966656677258e-23	0.221078692873739	0.144445184611572
SPIRE1	green	0.866719231179844	1.42023385081474e-14	-0.0503069	0.74277520153191
TFRC	green	0.894644875608668	1.20948175696178e-16	0.0534894964861547	0.727110910677202
TMEM117	blue	0.919994043395621	4.21928015516332e-19	0.173500055320035	0.254372894409651
MCPH1	magenta	0.952470268218103	8.03837475186004e-24	0.10221024230397	0.50406593404318
PSMC3	purple	0.968281981680866	1.57396889442986e-27	-0.194113	0.201354433730426
BEST1	purple	0.901696153947124	2.93243475298647e-17	-0.346893	0.0195668181967872
GADD45G	purple	0.819226954985222	6.03401272840252e-12	-0.234183	0.121536332542525
BATF	purple	0.862281293085017	2.74210042699759e-14	0.0338095555208758	0.825495702239766
RBM8A	purple	0.979936904295903	9.34640220960273e-32	-0.123869	0.417545180755126
ENTPD1-AS1	green	0.912604129354675	2.6150249577803e-18	0.209545013313129	0.167122886422205
NOS1AP	green	0.926409362241027	7.46581623796091e-20	0.129222715184992	0.39754477863801
TCF21	purple	0.746628777329634	3.8932052657657e-09	-0.248969	0.0991019003501154
RPH3AL	green	0.903452497292679	2.02635002508059e-17	0.0779964221981963	0.610563348399231
YIF1A	purple	0.939846457925251	1.120655406893e-21	-0.191031	0.208743131129211
FAM13A	greenyellow	0.868301081658945	1.11696275890738e-14	0.156527697555351	0.304505941737817
SLC10A7	blue	0.944235034858827	2.29775705959792e-22	0.207541058701671	0.171312491137157
ATP2B1	green	0.913679641326834	2.02590998880262e-18	0.104881114326868	0.492927391443833
POLR3GL	purple	0.934291044156419	7.0786691079634e-21	-0.142979	0.348774176071627
DENND5B	green	0.931440246074088	1.71396151027777e-20	0.275239368248309	0.0672606597125536
AGR3	purple	0.679078963726857	2.92885889680445e-07	0.108621959895973	0.477543260039402
DCXR	purple	0.884616960645849	7.70249231118984e-16	-0.305115	0.0415439162841815
PAFAH1B3	purple	0.932004604337418	1.44311079780552e-20	-0.0872495	0.568741322600808
LINC00639	yellow	0.871174340406196	7.16255472811139e-15	0.431116101743237	0.00311066168722744
CDC42	green	0.933291936210647	9.69337014166632e-21	0.092064064415585	0.547516856050566
LTK	brown	0.41888516964464	0.00418471748038326	-0.00982617	0.94892042961475
OPN3	green	-0.871088	7.2602469722473e-15	-0.229562	0.129278099579533
CCBE1	greenyellow	0.851192422538015	1.29033354063693e-13	-0.191098	0.208581957836081
SLC35F6	green	-0.872436	5.87343545826925e-15	-0.122802	0.421599630950364
CIITA	green	0.86026880026845	3.66777970047483e-14	0.126815369105854	0.406468929511852
DPH6	blue	0.938607410117676	1.71564599117701e-21	0.0255167779078189	0.867856389308015
HSP90AB1	purple	0.938730994361311	1.64495277156999e-21	-0.152477	0.317346769947479
RRAD	purple	0.784358089893322	1.83841956981916e-10	0.0923741687595672	0.546162855372671
LRP2	greenyellow	0.792103727373655	9.10645757981922e-11	-0.220227	0.146037067375282
SUMO1	purple	0.963499592966096	3.07362403182927e-26	-0.0762634	0.61854038376588
THADA	blue	0.941046772608186	7.35390974058882e-22	0.192150316453902	0.206038543553679
CDK2AP2	purple	0.93473575922022	6.14458251070873e-21	-0.141174	0.354954759366678
PSMB8	purple	0.954877539884315	2.69351559469808e-24	-0.0482499	0.752954969883468
EMC4	purple	0.95887472373155	3.81557987923653e-25	-0.0791767	0.605155962054237
MEF2C	green	0.9386639257226	1.68296659867708e-21	0.314638905071273	0.0352861656716427
ZMYM4	magenta	0.935066381441541	5.52738561372722e-21	0.240168658531782	0.112033018734247
CAPN8	green	0.82136819352699	4.77823492780087e-12	0.0955777388685161	0.532269647821709
ATG101	purple	0.951526797743086	1.21505569052874e-23	-0.139156	0.361945095991587
HCG17	green	0.967393577039243	2.82552056731425e-27	0.151683841226621	0.319900038925063
PSMD10	green	-0.881619	1.29618620448931e-15	-0.00685439	0.96435663943173
SCAF8	blue	0.929608394416529	2.96594172585387e-20	0.0832334765421086	0.586730620235267
DHRS7	purple	0.925573778057526	9.43672955070065e-20	-0.203239	0.180562226087152
KCNMB4	brown	0.790750634523307	1.03172703648424e-10	-0.0985734	0.519436321109752
ITPKB	green	0.913538571845666	2.09528205000851e-18	0.241026658480602	0.110718560336613
NCAM2	blue	0.81602184006105	8.50818305051283e-12	-0.0504397	0.74211957503702
TRRAP	green	0.908444763063034	6.81022509708791e-18	0.0870269849530773	0.569731506744008
CDK13	magenta	0.942613041322466	4.18730038216259e-22	0.200624763587371	0.186354136640038
DIRC3	green	0.934635861592937	6.34359908045023e-21	-0.0102945	0.946489364803023
EIF3A	green	0.888720887917026	3.68878634364973e-16	-0.0560812	0.71443533411365
PER3	brown	0.80961873334483	1.65769479657979e-11	0.0662714677810809	0.665357339654424
OBSCN	green	0.924482556810453	1.27621179715155e-19	0.127324961231515	0.404570287243272
PCLO	green	0.895921158572838	9.4296876015213e-17	-0.00794805	0.958674045017604
KCNIP1	green	0.769707287974487	6.43942791038578e-10	-0.118969	0.436344350715771
CCDC68	green	0.873774392976422	4.74713837151989e-15	-0.00877789	0.954363614773591
C15orf61	purple	0.922980860110454	1.91936953626244e-19	-0.0705224	0.64527226267985
PFDN4	green	-0.895108	1.10539249466671e-16	-0.00806098	0.958087394323946
COL15A1	yellow	0.838271646450046	6.7454579771396e-13	0.603902320327553	1.12280180307448e-05
FCN3	green	-0.116282	0.446850505750832	-0.411574	0.00497112047084135
TJP1	green	0.957511981445605	7.58647498784761e-25	0.121231620712681	0.427606597657654
NCOA1	blue	0.966220455840754	5.97131120641739e-27	0.202763389402743	0.181605884786146
MICAL3	green	0.909535572546451	5.32216186153557e-18	0.265887252111662	0.0775024363710775
MPP3	green	0.815045850332168	9.43423962394652e-12	-0.0862067	0.573387823319514
COL18A1	green	0.743012049291695	5.07280229278019e-09	0.52811820934997	0.000192545007426781
GSK3B	blue	0.970821653654479	2.68334604624661e-28	0.157376327835362	0.301858632214622
DAB1	green	0.870513676430828	7.940432995409e-15	0.0578063513402175	0.706039574662192
MDH1	green	-0.980091	7.92715790766113e-32	-0.15213	0.31846070500934
DAB2IP	green	0.930258204018954	2.44580524309504e-20	0.30006008454778	0.0452167755444003
TNKS	magenta	0.951543192814292	1.20644856769572e-23	0.173008922185666	0.255740661841389
EVL	green	0.887208262692497	4.85478356124952e-16	0.0812283959663579	0.595806171756242
TNRC18	brown	0.929833975681813	2.77448929704122e-20	0.14764105443933	0.333117377324392
BAD	green	-0.948008	5.29184979964029e-23	-0.0594423	0.698109551550269
BEX4	purple	0.953279636252906	5.60164258955666e-24	-0.172962	0.255871883800153
CRYBG3	green	0.927205914722512	5.95612694325047e-20	0.282120639470056	0.0604349623095816
ZMAT2	purple	0.968319072546348	1.53543287966329e-27	-0.134567	0.37814359277798
ABCA6	greenyellow	0.796401139348407	6.08815093906748e-11	0.0781892432344279	0.609678553482482
DIS3L2	magenta	0.965139051781451	1.16314140668581e-26	0.18005122491306	0.236597450003817
LPP	blue	0.981993595429973	9.32384060226933e-33	0.19741701136947	0.193640955327741
CDK6	green	0.888646782869031	3.73910266287896e-16	0.288781773776149	0.0543664903030899
TACR1	yellow	0.844231124099524	3.20460120104342e-13	0.472164697535369	0.00105785380614405
GNG11	purple	0.739256186639098	6.64690560894066e-09	0.141160021178696	0.35500425473103
ACSS3	greenyellow	0.852133508053247	1.13699228375932e-13	-0.199329	0.189273135471267
GRPEL1	purple	0.942362498279398	4.58686776790287e-22	-0.233391	0.122837682914122
BCAS1	black	0.780927773347889	2.48665207739368e-10	0.372700188981089	0.0116900213536157
FHL2	black	0.67300803484913	4.08718685819604e-07	0.569525245793881	4.44433387176341e-05
ERRFI1	green	0.756139886598846	1.89960631216154e-09	-0.0599052	0.695871836244951
PRELID3B	purple	0.935765103256971	4.41126536413266e-21	-0.170875	0.261741466313137
TPRG1	blue	0.839363083738014	5.89923119943558e-13	0.0105597284054055	0.945112750580381
CD86	purple	0.767063848380233	7.99553838936599e-10	-0.268946	0.0740266245716549
MSR1	blue	0.843849642128244	3.36407983149227e-13	-0.119495	0.434302631479712
PPP1R12B	blue	0.96828636489246	1.56936738018394e-27	0.182987497509172	0.228912203749083
SRCAP	green	0.946975783168145	7.99256756373096e-23	0.107344989159933	0.482766098426127
SLIRP	green	-0.964151	2.10069133121643e-26	-0.115374	0.450429832498378
LAG3	purple	0.763255165526466	1.08679354953543e-09	-0.0527004	0.730984924599143
SGPP2	blue	0.846117914095827	2.51546888138191e-13	0.0923496285998467	0.546269946085759
BACE2	yellow	0.905747175361686	1.23685150344628e-17	0.480387582163173	0.00083837879325506
CCDC80	purple	0.49516262692601	0.000543931712671612	0.421118454752435	0.00396729961501891
SLC4A7	green	0.847984969713031	1.97321372119084e-13	0.342203587147225	0.0213957886495627
ZNF75D	green	0.920166239242914	4.03534225788231e-19	0.0863266185551136	0.572852801105354
DPY30	green	-0.971886	1.22022966653519e-28	-0.0791701	0.605186268415473
TNXB	green	0.835623685282846	9.30000786381646e-13	0.347801297919197	0.0192280391584917
ACER2	yellow	0.878809612483891	2.0846315673944e-15	0.284504271882047	0.0582040818259916
SIVA1	purple	0.965812014190147	7.70067888769843e-27	-0.203912	0.179091726156248
GRHL2	greenyellow	0.903744378085616	1.90432962851125e-17	0.131219817556818	0.390228668870086
RND1	purple	0.661449166961449	7.54937950458288e-07	-0.105179	0.49169457745066
HACD4	green	-0.927656	5.23679234977385e-20	-0.189777	0.211802554933826
TRMT11	green	0.917935310588062	7.13468521060431e-19	0.0786762622972684	0.607446228405626
CEACAM6	purple	0.387466373160845	0.00854687271165718	-0.0234932	0.87825359840119
TMEM230	purple	0.953901145017987	4.2264031820553e-24	-0.13952	0.360679045016183
CTNND1	green	0.929662188592404	2.91917830158404e-20	0.298570887958472	0.0463477894692944
HDDC2	green	-0.950063	2.2702905593792e-23	-0.185096	0.223499646907707
NPAS2	blue	0.882364563345201	1.14032653438012e-15	0.0988224405620173	0.518376364996902
UACA	green	0.922704279645498	2.06733034549359e-19	0.289569078533652	0.0536828620982833
YDJC	purple	0.851568290570761	1.22688130044184e-13	-0.0304897	0.842402448982402
HERC1	magenta	0.961935221605592	7.45986538661513e-26	0.122353289147329	0.423311608531828
SHB	green	0.920004034068352	4.20839419286179e-19	0.258331912005446	0.0866396140440358
AMOTL1	green	0.938957780847749	1.52236848690812e-21	0.0909508414066777	0.552390643945234
ATP2C2	greenyellow	0.908755190397322	6.35077351267286e-18	0.00341743779119701	0.982224758564731
EPAS1	green	0.830722041927848	1.66065862822992e-12	0.178762825121654	0.240024547223049
ELOF1	purple	0.961911084267193	7.56041320309601e-26	-0.00671344	0.965089127128048
CEP192	magenta	0.943150204470785	3.43928347506125e-22	0.181115537161213	0.233791704577873
ARHGEF26	greenyellow	0.828667200791014	2.10603426493554e-12	-0.327265	0.0282061843489154
AHCYL2	green	0.898598157158141	5.53527522353412e-17	0.0417923167595523	0.785175078345065
MTX1	purple	0.946410778548872	9.98139490008957e-23	-0.109067	0.4757291420414
ADGRL3	blue	0.863237015218081	2.38449723000896e-14	0.154730406683919	0.310161537704247
RNF139	purple	0.944457237048251	2.11345980105333e-22	-0.149065	0.328424239661868
TRAPPC6A	purple	0.925807128142696	8.84153284690324e-20	-0.125802	0.410260582976566
ANKRD36C	green	0.886496871705923	5.51677681588555e-16	0.339693142439188	0.022432642982382
YWHAH	purple	0.931480901057829	1.6929380054415e-20	-0.165764	0.276489008238184
TOB1	green	-0.836205	8.6715248877844e-13	-0.0881748	0.564632995115011
TNC	blue	0.414912294066338	0.00459734098587246	0.414929538127444	0.00459547590675341
AGBL4	green	0.870420834660345	8.05595229150527e-15	0.126880919013845	0.406224416077479
AC002066.1	green	0.893810352682555	1.42081998753636e-16	-0.057739	0.706366680117366
PPP2R5C	magenta	0.882337466656603	1.1456658604954e-15	0.0155638304232708	0.919174650076482
FCGRT	green	0.954088521177365	3.8793121105927e-24	0.121834892960402	0.425293568319228
APOBEC3G	purple	0.855039399352211	7.65030307445456e-14	0.0128649387799726	0.933155404451061
KIAA0355	green	0.881741492250303	1.26926888044466e-15	0.350562923182672	0.0182287092155404
DPCD	green	-0.920228	3.97107751702199e-19	-0.0363301	0.812711361562356
HERPUD1	green	0.860154300113189	3.72847416144723e-14	0.0143302180610775	0.925562252265344
LEF1	yellow	0.863476947496514	2.30191830642786e-14	0.605242688714789	1.06069257579611e-05
CYP3A5	brown	0.715935274392654	3.23066860886395e-08	0.00434512560761705	0.977400654762279
TMEM164	green	0.877081593889062	2.7761470105271e-15	-0.0654977	0.6690388704937
PEG10	purple	0.535703548775743	0.000149293374170711	-0.344836	0.0203519429523611
ZNF462	green	0.876870714780807	2.87407044302637e-15	0.312948117406652	0.0363366169517024
ECHS1	purple	0.94186060408357	5.49893413336818e-22	-0.0495559	0.746486838307483
RSL1D1	purple	0.972315849305052	8.79595315749199e-29	-0.171957	0.258687757818544
ZNF710	green	0.931982653288538	1.45283802364734e-20	0.122598339996599	0.422376535506776
SCGB2B2	blue	0.964231402229384	2.00311808621195e-26	0.1188161718668	0.436938236829886
LARP4B	green	0.920818327921858	3.40547503955807e-19	0.0634926956307021	0.678614166870733
SMC5-AS1	green	0.914609924657517	1.62018144500897e-18	-0.0138833	0.92787743756315
ABCA10	greenyellow	0.902310551549599	2.57883294688189e-17	0.0820936708141379	0.591882124243801
MAMDC2	greenyellow	0.827117820438027	2.51404022071781e-12	-0.0467671	0.760318731108354
BAG1	purple	0.95562730050477	1.89287437222215e-24	-0.0550902	0.719273247244121
MZT1	green	-0.923623	1.61361268409743e-19	-0.0670386	0.661714967204701
RALGAPA1	blue	0.96913779592408	8.81634806384858e-28	0.20280470298519	0.181515019703031
TNFSF12	purple	0.917843714347991	7.30106126184649e-19	-0.121561	0.426341663208988
MAD2L2	purple	0.940314677197095	9.51823304089727e-22	-0.109327	0.474674367004469
TMEM14A	green	-0.93009	2.57166806288885e-20	-0.165104	0.278432503449965
NDUFA12	green	-0.959811	2.34684956221806e-25	-0.224673	0.137865532557679
FAM32A	purple	0.950519795805243	1.87156284870754e-23	-0.0918824	0.548310900781872
SNHG8	purple	0.921525628614888	2.82824697260038e-19	-0.18127	0.233386855338846
SLC8A1	blue	0.901767263450854	2.88927142161912e-17	0.130367745534673	0.393340410435218
AKR1C2	purple	0.647414240683603	1.53617483038702e-06	-0.325035	0.0293626944996847
PIK3C2A	green	0.926218780866358	7.87749981567901e-20	0.248796039731708	0.0993448425217161
EBP	green	-0.951394	1.28694700171281e-23	-0.226516	0.134580493724198
KLHL4	yellow	0.87924591457854	1.93783828581117e-15	0.354190134734471	0.0169830848142332
SURF2	purple	0.893947880661139	1.38373568201093e-16	-0.135018	0.376533706808113
ANTXR1	blue	0.846386256453157	2.42968377660235e-13	0.414347367420367	0.00465880887682464
TTLL3	green	0.908559908050854	6.63624068055401e-18	0.226108158770186	0.135302322836329
ASCC3	blue	0.976873623929695	1.92415945285566e-30	0.180315597469224	0.235898375931911
DOK5	turquoise	0.680056219438306	2.77385383931868e-07	0.5213895953241	0.000240093952930625
SERTAD3	purple	0.954150517603307	3.77056945486431e-24	-0.0984337	0.520031249444626
PPP6R3	blue	0.952508264658925	7.90434695620241e-24	0.177163811077617	0.244324593546902
FUCA1	green	-0.909124	5.84257509908561e-18	0.0311821752480001	0.838869697361819
UBR3	blue	0.974230978345775	1.91939785288099e-29	0.134867409139621	0.377071808857474
MT2A	purple	0.678769817721865	2.97954696551603e-07	-0.191048	0.208702547804026
RNF180	green	0.899845144978042	4.29697052916961e-17	0.150128275656375	0.324946046284431
UNC5C	blue	0.839871196425703	5.54045787060286e-13	0.181490885978715	0.232807656539283
RFK	green	-0.891395	2.24769652425169e-16	0.0266832310642995	0.861872976569668
CFTR	greenyellow	0.840192197984779	5.32453673007732e-13	0.177132566252538	0.244409132992253
HMGN2	purple	0.975699588676706	5.51533669973184e-30	-0.162421	0.286427066819068
ATR	magenta	0.949474482216379	2.90307583855815e-23	0.109464150351689	0.474115072086175
FBLN1	purple	0.581682991820185	2.78101474886244e-05	0.101985729922148	0.505008035096958
MRPL15	green	-0.949686	2.65877080079237e-23	-0.0325686	0.831806529208437
LY96	green	-0.836033	8.85298842664942e-13	0.09450053906918	0.536921905335602
ARHGAP44	green	0.821374077920974	4.77515154051774e-12	-0.104366	0.495066032104944
MAGOH	green	-0.955089	2.43999517865505e-24	-0.120215	0.431519239766623
SRM	green	-0.733259	1.01385272054922e-08	0.039458958607486	0.796908402776483
POP4	purple	0.938723538936359	1.64913775260698e-21	-0.22613	0.135264225849671
C16orf89	purple	0.729964830009376	1.27238075526184e-08	-0.0713275	0.641495710772692
PTGFR	greenyellow	0.769726471359476	6.42925428474018e-10	-0.311411	0.0373136879553706
CPXM2	yellow	0.81118783048966	1.41102440757254e-11	0.469672408343307	0.00113381409668449
TNNI2	purple	0.706644839655346	5.81183238932477e-08	0.00135565960579177	0.992948285019176
SPTLC3	green	0.921522427127892	2.83063667070706e-19	0.128492390226931	0.400240010221378
PDZRN4	blue	0.857663992042484	5.30909003338431e-14	0.256167003621961	0.0894066611085884
CLDN18	pink	0.563802496152505	5.50674678351427e-05	-0.538537	0.000135546498877945
SVEP1	greenyellow	0.89455397122003	1.23096634893211e-16	-0.170641	0.262403943497045
TMEM100	brown	0.383089290860896	0.00939186763864663	-0.236316	0.118081751688422
GLRX5	purple	0.931816678781286	1.52842967963426e-20	-0.0679671	0.657316830088721
AASS	green	0.888889725732292	3.57653419239613e-16	0.0752873430952929	0.623052029559618
IFITM3	green	-0.948676	4.03403523569695e-23	-0.069554	0.649826470323183
ADIRF	purple	0.910986089265168	3.81586839221282e-18	-0.0973381	0.524709665340903
CCDC171	green	0.919301364155827	5.04280972690811e-19	0.209726191770157	0.166747796252279
MAPK8	blue	0.943992252970338	2.51656181551575e-22	0.126100267158866	0.40914189326926
PLEKHH2	greenyellow	0.88638207478497	5.63130882586263e-16	0.0435809695349894	0.776212439045031
ITPR3	green	0.909936365746821	4.85742865732831e-18	0.0651834151423125	0.670536429244613
IER5	purple	0.890650264912308	2.58353535509057e-16	0.0228742328755418	0.881438063753729
NUDT16L1	purple	0.897471653763851	6.93860489216882e-17	-0.01848	0.904095311138204
ZNRF3	green	0.930457266849387	2.30466090601165e-20	0.145945234105496	0.338761380906288
ALS2CL	brown	0.935117617364481	5.43718173585587e-21	0.0704412676145156	0.64565324855546
LSM7	purple	0.976354955579361	3.08397403711545e-30	-0.0792422	0.604856399408415
NOVA2	green	0.911696334758779	3.23549409359961e-18	0.154154413267382	0.311988098322636
WNK2	turquoise	0.85152052400122	1.23477814326218e-13	0.41963099718086	0.00411097718033239
HSD3B7	purple	0.860604526906985	3.49516069362131e-14	0.0947983408264609	0.535633776345088
ROBO4	brown	0.886499969778762	5.51371670362396e-16	0.162413757414832	0.286449439038985
ZSWIM5	green	0.951418959721599	1.27314147168387e-23	0.160813325439743	0.291288468240813
DIP2B	blue	0.968010436639871	1.88548326433066e-27	0.201719549888893	0.183912518533613
RABGAP1L	magenta	0.955245399622823	2.26716341390216e-24	0.162008508580857	0.287669758288364
CDYL	green	0.897807839652178	6.48791959055697e-17	0.221368806624521	0.143905697956805
ADAM23	yellow	0.83910887057075	6.08686108980069e-13	0.441674050220659	0.00238679002330166
PCDH7	yellow	0.92846934229669	4.14036470355713e-20	0.492344313221526	0.000591615340104681
KRT18	purple	0.802716248022871	3.3101004865916e-11	-0.231201	0.12649042722203
DTNA	blue	0.877924801857927	2.41528360663032e-15	-0.0576823	0.706642167375414
EPHA7	green	0.205582094419455	0.175480839427878	0.0637204257488811	0.677524039941672
RTEL1	green	0.952006786916759	9.85742669577287e-24	0.0873978931282709	0.568081671946389
SLX4IP	green	0.942861386407001	3.82404939382463e-22	0.244056056852353	0.106171331734606
MAST2	green	0.923389259557968	1.71915705292514e-19	0.163555160192755	0.283030503488977
DUSP23	purple	0.944051195910877	2.46168842523485e-22	0.01131073860908	0.941215751646117
STK3	green	0.973625678795426	3.14305029432893e-29	0.105879315426164	0.488797430195976
ZFP36	blue	0.673774097123033	3.92055367861229e-07	-0.0643676	0.674429764277531
EDIL3	blue	0.863689769051614	2.23094226220932e-14	-0.00419929	0.978158976107381
CHRAC1	green	-0.909565	5.28643232424737e-18	-0.0469636	0.759341993350072
GADD45B	purple	0.877628504924076	2.53669928055034e-15	-0.243911	0.106385660835267
TMEM109	green	-0.878741	2.10861040129208e-15	0.0246405011692675	0.872356146239953
PDZRN3	greenyellow	0.809584581326886	1.66349058013332e-11	0.10836956550284	0.478573188196685
TYW1B	magenta	0.966967112444154	3.72039793476767e-27	0.0602342039110787	0.694282449240073
NDUFS8	purple	0.974869645660747	1.12610386643614e-29	-0.184162	0.225887026852131
ADRM1	purple	0.957926306053352	6.17073421978488e-25	-0.22113	0.144350205720638
LINC00630	blue	0.97096209021083	2.42232655380895e-28	0.138095577134889	0.365650891409278
PLEKHA5	greenyellow	0.812339222171023	1.25250022875669e-11	0.300446842227177	0.044926741639752
ENKUR	green	-0.769594	6.49963617683845e-10	0.0710613821746339	0.642742913754076
NFATC2	yellow	0.690132494634106	1.56413344077608e-07	0.279206867252472	0.0632542921590127
OSTC	purple	0.962406296712886	5.73447884771363e-26	-0.183375	0.227910359028177
SFN	purple	0.695353863449351	1.15185404688143e-07	0.0685606601460478	0.654511260871873
SPINT2	green	-0.924967	1.11671200832022e-19	-0.136587	0.370960458616763
CMIP	green	0.934154088021156	7.39251708563651e-21	0.347901816073344	0.0191908720408622
VPS54	magenta	0.934839945399208	5.94335151687332e-21	0.124395922854082	0.415553048786531
NTNG1	green	0.916470604701137	1.02821405654176e-18	0.00389846048158016	0.979723285611281
NDUFAF4	purple	0.923822698392196	1.52844039273028e-19	-0.149102	0.328300756202119
RP1	greenyellow	0.728625364784237	1.39419312127045e-08	0.135721389552172	0.374030076223791
SSBP2	blue	0.948064081368493	5.17357974593563e-23	0.166939084795918	0.273051703543038
PELI1	blue	0.840384144762877	5.19924892778334e-13	0.00194272614731622	0.989894683185165
METRN	purple	0.720908154221588	2.33687317210948e-08	0.131515700376611	0.389151499449805
ARHGAP12	blue	0.919313150241856	5.02760115447315e-19	0.123401718263317	0.419319179336385
VPS13A	green	0.943824625459636	2.67904515761037e-22	0.14155351337469	0.353650979524406
SKIL	green	0.925983780093058	8.41485924784953e-20	0.0787101774183243	0.607290904482017
PPP1R16B	green	0.8893242197933	3.30235953055281e-16	0.324760714543667	0.0295078452399041
RUNX3	purple	0.762442349369985	1.15951018025285e-09	-0.156396	0.304919227115977
HECTD2	magenta	0.958198721780862	5.38102592420455e-25	0.228834124734799	0.130530771705257
COL3A1	brown	0.618381572664351	5.98768829574746e-06	0.320021099098394	0.0321074619481575
TIFA	purple	0.934162806775302	7.37214936643438e-21	-0.0523242	0.732834109354025
PDZD11	green	-0.933269	9.76253834782418e-21	-0.0769872	0.615203173999985
TPRKB	green	-0.946161	1.10015241058079e-22	-0.0349446	0.819733139514575
TGFBI	purple	0.902416052785864	2.52233940930514e-17	-0.0447485	0.770377564081799
BHLHE41	purple	0.817152486634924	7.54267014578484e-12	-0.293555	0.050327426599712
RUSC2	green	0.949052645829773	3.45664535057152e-23	0.0811303299825867	0.596251624817597
NPAS3	green	0.897408827407524	7.02605661904415e-17	0.376209599534761	0.010865090203308
SPATA6L	green	0.930199419894651	2.48903223841842e-20	0.190065169268106	0.211097293952454
HDAC7	green	0.926450044273176	7.3806248810582e-20	0.251261963210432	0.0959296884842652
ADGRG6	green	0.906147300882895	1.13337226885229e-17	0.160547755483709	0.292096537158186
CKB	purple	0.718586499295451	2.72065287514152e-08	-0.206581	0.173346854345203
FAM184A	green	0.843174033148405	3.66508144921752e-13	-0.014315	0.92564131819066
DNAJB6	green	0.877891047761831	2.42883215602307e-15	0.039632565813565	0.796033855666451
ATP6V0E1	green	0.965980288468884	6.93719778238966e-27	0.0790871302166334	0.605565694989418
AK6	purple	0.934963523006854	5.71278596924338e-21	-0.0881939	0.564548599717333
NME4	purple	0.916329069604238	1.06479409559779e-18	0.0497051475143095	0.745748818752839
LDLRAD3	yellow	0.883325456390053	9.65525386287326e-16	0.222084146552118	0.14258184307702
COG5	blue	0.944421083171366	2.14245673695134e-22	0.0890722873596118	0.560661386638156
RNPC3	green	0.933099987292901	1.02910957616969e-20	0.112378423921402	0.46235369019486
RBM42	purple	0.964712079108855	1.50471563074386e-26	-0.143671	0.346423570873633
DMTF1	blue	0.878787930005672	2.09219463738e-15	0.0623105395084676	0.684283444914807
ADGRA3	green	0.903042806871434	2.21018843160325e-17	0.133878441753686	0.380612665405893
SRGAP1	blue	0.852840873915639	1.03325745658392e-13	0.306022438058981	0.0409111120580958
DNAJC19	green	-0.97503	9.82800151196291e-30	-0.0950536	0.53453101515409
ST13	purple	0.971852966691647	1.25060162581175e-28	-0.0587412	0.70150450112029
GIMAP5	green	0.85939165667933	4.15764579418248e-14	0.0456011589090585	0.766124121565317
MRPL14	green	-0.936796	3.1477537957085e-21	-0.317338	0.0336608898496981
LCORL	blue	0.870277729536964	8.23713384843016e-15	-0.0410301	0.789002624416726
ARHGAP23	green	0.900038680292664	4.13013805907955e-17	0.346876653844003	0.0195727862261964
VAMP5	purple	0.926686845530603	6.9027878462449e-20	-0.00549052	0.971445567685404
BCKDK	purple	0.947759127036856	5.84962871994198e-23	-0.126035	0.409386288296932
PLOD2	green	0.797121535788498	5.68545770116137e-11	0.275465840311901	0.0670266774355272
ANKAR	green	0.941644072690834	5.94351110765815e-22	0.0811804171558126	0.596024091507072
NUDT15	green	-0.910454	4.3140866819486e-18	-0.0814842	0.594644939840961
ORAI3	purple	0.928389238674963	4.23776503305862e-20	0.023574245596188	0.87783682561992
EDA	green	0.923553894838045	1.6441972949113e-19	-0.0315422	0.837034100921302
NDUFB8	purple	0.968878481508699	1.05268235824383e-27	-0.137996	0.366000629556485
TTC7B	green	0.912721379451461	2.54366552997084e-18	0.241599978299466	0.109846801588046
HACE1	green	0.920602952226375	3.60238631393875e-19	0.188927217184057	0.213894312476471
SH2D3C	green	0.875646109880309	3.51061604067542e-15	0.173514959045219	0.25433146559737
C19orf33	purple	0.747656757801329	3.6081707346126e-09	-0.221285	0.144060982495286
NEURL1B	green	0.797300978915861	5.58912766757892e-11	0.521099922490541	0.000242361036449438
DYNLT1	purple	0.965134461388602	1.16638548364919e-26	-0.14954	0.32686581061839
PID1	blue	0.889143130158572	3.41411669521517e-16	-0.0784388	0.608534278823913
MIRLET7BHG	green	0.936250150588537	3.76628873305643e-21	0.278424763743525	0.0640286217589873
SPOCD1	purple	0.635018707386945	2.79348277731837e-06	-0.227302	0.133197377058666
SH3PXD2A	green	0.860614970857668	3.48991609694857e-14	0.339011045359837	0.0227215287972494
BEX2	purple	0.736012930547659	8.36340672303207e-09	-0.317433	0.0336053252801215
RASGEF1B	blue	0.877763172602311	2.48081581708895e-15	-0.0371857	0.808382500334732
ASNSD1	purple	0.951885736582973	1.039341747975e-23	-0.100582	0.5109181123345
SNX30	green	0.847948736672372	1.98259409485301e-13	-0.033236	0.828411177524281
ABLIM3	green	0.889538281612554	3.17472617082896e-16	0.330904697529775	0.026400134007729
STK39	blue	0.906297499334861	1.09669291565223e-17	0.0566667546454508	0.711581816260286
FMO5	greenyellow	0.823671023507064	3.70485395724222e-12	-0.353685	0.0171519726879837
DHRS4L2	green	-0.899306	4.79633329140222e-17	-0.154926	0.309542620329224
PSMG3	purple	0.951505278378921	1.22644165899229e-23	-0.0495393	0.746568959891231
CDH11	yellow	0.828140706381007	2.23709628855831e-12	0.307408949675873	0.0399594700018739
RHOH	purple	0.887588401258356	4.53265006527569e-16	-0.153112	0.315311718727937
MEDAG	black	0.499549339278025	0.000476553851120799	0.268817483231614	0.0741696149328081
EZR	greenyellow	0.779438201216619	2.83040308064727e-10	0.00641699119665475	0.96662980057072
TNFRSF4	purple	0.632719018321517	3.1122605624952e-06	0.11255720558103	0.461637316534357
HRH1	green	0.828596843538718	2.12311896107873e-12	0.33883882126015	0.0227949611099532
ADAM17	green	0.886135740229372	5.88472712292525e-16	-0.0231585	0.87997526124574
HPSE2	yellow	0.780602688275015	2.55814098100278e-10	0.385056327512605	0.00900363522725212
MRPL27	green	-0.974574	1.44420344789269e-29	-0.102828	0.501479615615281
MYO5C	green	0.862849849950047	2.52368942661993e-14	0.102745323160532	0.501824234272687
PEBP4	greenyellow	0.729602111853135	1.30434414443112e-08	-0.507882	0.000368864059555569
MYO1B	green	0.910532548790272	4.23678508754421e-18	0.0316753488819554	0.836355781417136
C6orf226	purple	0.886052930103873	5.97231931372885e-16	-0.0609934	0.690620481698779
HEXA	magenta	0.938328200396984	1.88614414839781e-21	0.0906552802123336	0.553688078117042
LINC01169	brown	0.81533077999335	9.15450338659267e-12	-0.0100653	0.947679086688019
SPTSSA	purple	0.847716476464869	2.04373263655859e-13	-0.357045	0.0160539544453126
CYP7B1	blue	0.876304089595936	3.15365130149929e-15	0.10701694371469	0.484112626990823
SSH1	green	0.875333020452598	3.69360536255079e-15	0.202893425918838	0.181319992500488
TTLL5	blue	0.919291537544154	5.05552321380652e-19	0.145686123617769	0.339628931546715
CUX1	green	0.950866213815255	1.61476802639673e-23	0.0920871254781337	0.547416110030688
ABCA13	yellow	0.807355108080502	2.086029956716e-11	0.337391364252659	0.023420017532009
SHC2	green	0.892556183513003	1.80536054341998e-16	0.308620013450148	0.0391431391398611
TNS1	green	0.913494138530939	2.11759548006234e-18	0.127493980062018	0.403941687504287
HCCS	green	-0.952839	6.82497899892447e-24	-0.165701	0.276674688111793
USP24	blue	0.937276203913468	2.68473577669673e-21	0.0627515107792453	0.682166646698046
ABHD14B	green	-0.914143	1.81298523311554e-18	-0.134941	0.376807469539256
ABCC1	green	0.943444338294991	3.08543856722952e-22	0.192762779157761	0.204568931089071
CHST15	yellow	0.836295375944727	8.57705910065422e-13	0.329823781456789	0.0269261922294381
NRF1	magenta	0.956084724337831	1.5217826393125e-24	0.15313821649257	0.31522724828954
CNTNAP3B	green	0.801061330980824	3.89137205608391e-11	0.389616175943593	0.00815643306165718
PLA2G4C	brown	0.816030891498314	8.50001044160387e-12	0.288361369556022	0.0547343922473703
ADAMTS4	purple	0.430302758659408	0.00317369634265639	0.247715505899328	0.100870474914897
EHMT1	green	0.95410713154612	3.84635975257752e-24	0.156791272365415	0.30368213097479
CLPP	purple	0.963195596836915	3.66252058392011e-26	-0.147187	0.334623865335435
CCDC102B	brown	0.715481524297302	3.32643930996234e-08	0.0375830931740917	0.806373563889622
TBCD	green	0.945472119004907	1.436257279205e-22	0.298349183345228	0.0465181170458014
DYNLT3	purple	0.913738656840133	1.99754041282479e-18	-0.203197	0.180653471262515
FREM2	green	0.765461982989034	9.10363502817535e-10	-0.143947	0.345486598164692
RABIF	purple	0.934238188163177	7.19826258414324e-21	-0.199437	0.189028811534876
TRIM66	green	0.946557912001073	9.42239262289278e-23	0.131747524959934	0.388308756593297
SLC26A9	greenyellow	0.671571644040552	4.41751007177555e-07	-0.350245	0.0183414185030453
LINC00578	magenta	0.843840676107905	3.36791679111748e-13	0.178434136169279	0.240904223628874
SNX29	green	0.937353300693111	2.61670751111382e-21	0.109702796274847	0.473146027017893
DDX39B	green	0.955068233482967	2.46378783210134e-24	0.0880453355928647	0.565207081607015
SPTBN1	green	0.947725656218733	5.92874759995488e-23	0.13711233181842	0.369107237068508
SLIT3	greenyellow	0.80055271180732	4.08851156497093e-11	0.178208655084012	0.241508947885675
PPM1H	green	0.924589425617802	1.23928301492511e-19	0.15542302351389	0.307974185150499
SCAI	green	0.898830350674702	5.28164773985129e-17	0.0186279822654489	0.90333117401468
STRADA	green	0.971698729719642	1.40436596869348e-28	0.156517591085276	0.304537558267206
MAFF	purple	0.849280629410307	1.66406136132615e-13	-0.105962	0.488457463872704
BMPR1A	green	0.832577635608429	1.33632177739368e-12	0.0922327834680039	0.546779983761358
TMEM9B	purple	0.961644389747336	8.76076490704521e-26	-0.100454	0.511461359844411
SSB	purple	0.967943141965572	1.97130561816119e-27	-0.167301	0.27199940636964
ELP4	blue	0.924671294110072	1.21168222246014e-19	0.136340906191131	0.371832656076356
FUT8	blue	0.958476445353373	4.67547927190643e-25	0.310525421159867	0.0378864674016663
PXDN	green	0.871875963229673	6.4157253915331e-15	0.368359050988819	0.0127840882448266
DCBLD1	green	0.879857628939358	1.74843742750413e-15	0.346396486824212	0.0197538576278211
MMP23B	purple	0.442328056269436	0.00234729764686002	-0.154723	0.310185794910699
EFCAB13	green	0.928869144969085	3.68520471829018e-20	0.219884302513869	0.146681990582223
RASSF8	blue	0.870100241232067	8.46720926146614e-15	-0.0912429	0.551110152401089
[truncated: 5,002 more rows]

## Sheet: Table S4(MM_GS2_Epithelial)
Table S4: MM and GS in Epithelial cell
Gene	Module	MM	p.MM	GS	p.GS
TNR	green	0.990555314891106	9.5740325402288e-39	0.110532856592567	0.469783688816176
SCGB1A1	green	-0.903336	2.07721049843886e-17	0.0719678437179605	0.638498199577319
C5orf17	green	0.984985410946103	1.93097585269156e-34	0.123648281172189	0.418383377517236
SCGB3A1	black	0.904377184861104	1.66329415079052e-17	0.105530198809451	0.490239817995243
RPS4Y1	green	-0.225981	0.135528623387781	0.0401817621816534	0.793268908234784
NALCN	green	0.967692467281779	2.3248916995834e-27	0.102160455200138	0.504274773960137
MSMB	black	0.797245306773151	5.61884829947262e-11	0.172835090663844	0.256225947982097
MT-CYB	green	-0.922838	1.99439963973241e-19	-0.00944082	0.950921079846455
XIST	green	-0.0177265	0.907988919673003	-0.00398124	0.979292826644359
SLPI	green	-0.979724	1.17027672971514e-31	-0.0816692	0.593805501353222
MT-ND2	green	-0.918084	6.87273914632058e-19	-0.0253174	0.8688797989138
SAA1	green	-0.891972	2.01623511157464e-16	-0.0755822	0.621687446451377
MT-ND4	green	-0.910548	4.22209713714688e-18	0.012357456164503	0.935786608060746
BPIFB1	yellow	0.924912860842064	1.13360447354563e-19	0.257779060462995	0.0873398083837628
NTM	brown	0.698890008372318	9.32858871249157e-08	0.144691774781594	0.342970938638737
MT-ATP6	green	-0.906582	1.03035853616106e-17	0.0201002361014618	0.89573155760671
TFF3	black	0.900850846813461	3.4947030990654e-17	0.0863311398808568	0.57283262601822
MT-ND1	green	-0.904573	1.59471493626277e-17	-0.00423281	0.977984694740431
SCGB3A2	green	-0.943709	2.79670049079524e-22	-0.0690199	0.652343731383409
UTY	blue	0.409349953840619	0.00523455843325253	0.219125356911351	0.148116529714676
RPL21	black	0.980666286014793	4.24617842228559e-32	-0.155194	0.308696994604137
GPC5	green	0.948984238221869	3.55537823605792e-23	0.151297766052557	0.321147768528029
RPS17	black	0.98229705129929	6.4892777638486e-33	-0.131525	0.389119187313079
MT-CO3	green	-0.918515	6.16308063808388e-19	0.0317141003059928	0.836158316874397
DDX3Y	green	-0.0366717	0.810982363692998	0.179493789465594	0.238076089727534
FKBP2	green	-0.969675	6.07488980800231e-28	-0.0423644	0.7823053262064
AC019117.1	green	0.970257554423754	4.02752568589451e-28	0.172703981047884	0.25659237510278
RPS18	black	0.973695901747682	2.97002033074295e-29	-0.173473	0.254448882093484
MT-CO1	green	-0.911129	3.69137547476095e-18	0.0285599889058121	0.852262165136278
CXCL8	green	-0.918734	5.82911777109675e-19	-0.0188004	0.902440511060456
S100A9	black	0.946153699081701	1.10345914944008e-22	-0.214754	0.156580528674678
FABP4	green	-0.876551	3.02873817223838e-15	-0.324126	0.0298454404605065
RPS10	black	0.971638835214916	1.46879794691693e-28	-0.126939	0.406006990589943
FOLR1	green	-0.962718	4.80940141383997e-26	-0.120436	0.430666777002197
RPL7	black	0.980262572349207	6.59528484916198e-32	-0.141556	0.353642360958138
RPS5	black	0.977501688713658	1.07115216609824e-30	-0.161933	0.287898298352309
BPIFA1	yellow	0.603798963897684	1.12772737117306e-05	-0.00747195	0.961148
AGBL4	green	0.945187024948505	1.60206663214978e-22	0.208871364600447	0.168522892080878
RPS4X	black	0.976680216230816	2.29706674848387e-30	-0.1404	0.357627892793103
RPL23A	black	0.982612564765647	4.42214025884594e-33	-0.163238	0.283977540341211
RPS12	black	0.977600956604433	9.74963011778321e-31	-0.189624	0.212179600064975
KDM5D	green	0.0634133339528762	0.678994217856565	0.149841375767389	0.325882130855046
RPL13A	black	0.976937495019843	1.81422801543351e-30	-0.157504	0.301462530059356
RPL18A	black	0.975556054561315	6.25093114688679e-30	-0.180889	0.234387431986121
RPL27A	black	0.981783111078316	1.19455717781909e-32	-0.153491	0.314100441235519
MUC5AC	pink	0.578770035132355	3.11691943502374e-05	0.131691749689818	0.388511416230006
RPL39	green	-0.929115	3.42933889182582e-20	-0.0627992	0.681937968126025
TTTY14	blue	0.386312536067795	0.00876299711781397	0.249634077296533	0.0981738730338592
RPS23	green	-0.977766	8.33027231098668e-31	-0.141929	0.352363399560403
RPL15	black	0.969665869849019	6.11527540882366e-28	-0.183119	0.228572186033025
IGLC2	black	0.750404338119427	2.93936921864681e-09	0.156622688708083	0.304208879329773
RPL29	black	0.979687801594469	1.21560684123447e-31	-0.158289	0.299029019673816
USP9Y	blue	0.406625153050173	0.00557386092693966	0.254794145412486	0.0911966133662006
CCL20	black	0.89691870323852	7.74508656898926e-17	-0.22881	0.130573292067432
RPS14	black	0.979057506130554	2.33035978659068e-31	-0.165551	0.277116728443025
RPS20	black	0.986143136261185	3.47929659952598e-35	-0.128675	0.399565289098851
RPLP1	green	-0.974918	1.08076008222405e-29	-0.129525	0.396432078983592
RPS13	black	0.974907579794887	1.09052691922765e-29	-0.181744	0.232145097222202
RPL19	black	0.97912864576554	2.16748701749253e-31	-0.165805	0.276368635038193
RPS15A	black	0.979454485376503	1.55036269531926e-31	-0.147179	0.334647934290224
LINC00278	blue	0.38722315788115	0.00859204290496844	0.262993163576671	0.0809085410332746
RPS6	black	0.96786383987544	2.0772162483632e-27	-0.141046	0.355397266925759
MT-CO2	green	-0.888832	3.61443784505502e-16	0.0219549495414035	0.886170929519165
PHLDA2	black	0.94223014285222	4.81232615309805e-22	-0.0956117	0.532123149114376
FCER1G	green	-0.931274	1.80274984444389e-20	-0.256673	0.0887543903526423
RPL35A	black	0.973541827904781	3.36224237278845e-29	-0.155567	0.307520996355173
RPS27A	black	0.984141796623525	6.20274935872719e-34	-0.125155	0.412691742814675
RPL27	black	0.98678436802054	1.26424248802428e-35	-0.168485	0.268570993535307
GSTA1	black	0.781189848661756	2.43039190980628e-10	0.216961185244008	0.152263932273416
UBB	green	-0.959944	2.18840683778486e-25	-0.072113	0.637819730753017
RPL34	black	0.978682246149283	3.40127389159961e-31	-0.121131	0.4279922962731
RPS2	black	0.968927640310415	1.01800237736355e-27	-0.212656	0.160766934978065
NDUFA4	black	0.97079220751423	2.74137220122253e-28	-0.133231	0.382942398895988
SFTPC	black	0.821948727698545	4.48291823311548e-12	-0.354316	0.0169413503277497
TMSB4X	black	0.971214135878485	2.01334634641379e-28	-0.160731	0.291538105301803
FTL	black	0.954958543474552	2.59354592174181e-24	-0.234475	0.121058266814018
RPS19	black	0.976908212788312	1.8638629464347e-30	-0.146038	0.33845273265896
RPL32	black	0.981635475279723	1.41886642999096e-32	-0.162891	0.285015999511841
APOC1	green	-0.938789	1.61270050120114e-21	-0.229081	0.13010572943348
C1QA	green	-0.901992	2.75707157270576e-17	-0.217397	0.151422405631379
APOE	black	0.929622539530167	2.95357683275748e-20	-0.0829951	0.587806320860771
NCKAP5	green	0.886849709447879	5.17841590382753e-16	-0.0654471	0.669279810384437
FAU	green	-0.975144	8.91518467244393e-30	-0.179672	0.237601940762448
RPL26	black	0.976067278357137	3.98832519080817e-30	-0.151726	0.319763796163736
RPL12	black	0.982024994863602	8.98323857733821e-33	-0.147715	0.33287202673451
MMP7	black	0.80084797192649	3.97295337480376e-11	0.35706495306656	0.0160477258917424
FABP5	green	-0.95507	2.46171162833852e-24	-0.287418	0.0555676321196243
RPS27	black	0.984397999782287	4.381242951278e-34	-0.192094	0.206173556433021
CCL18	green	-0.905962	1.18022486553485e-17	0.0165155871129797	0.914249901965325
CST3	black	0.969079947698584	9.17328036092456e-28	-0.0998142	0.51416608687211
COX6A1	green	-0.976606	2.45661423457807e-30	-0.118916	0.436550119650343
HULC	green	0.966276940341674	5.76351269829281e-27	0.0727844473198767	0.634684020916204
RPL30	green	-0.97304	5.01061837740065e-29	-0.13954	0.360608607357147
MT-ND3	black	0.858293539152039	4.85840254680912e-14	0.115495136638619	0.449951155280178
KHDRBS2	green	0.93951653992173	1.25632039214311e-21	0.0285796537452706	0.852161571613167
AGBL1	green	0.906076414901847	1.15108460064939e-17	-0.0184096	0.904459071975424
UBA52	black	0.98021111514306	6.97146796929972e-32	-0.152961	0.315795194764778
C1QB	green	-0.899221	4.88004816212774e-17	-0.27527	0.0672291270425718
VMO1	black	0.785542470717205	1.65426160675912e-10	0.0838403254262623	0.583996088070494
RPL8	black	0.982457275559032	5.3455109620191e-33	-0.179619	0.237743516990073
RPS15	black	0.977160061787433	1.47604736540033e-30	-0.135352	0.375343605011642
TPT1	black	0.980673586014002	4.21214511949913e-32	-0.106103	0.48787291344551
RPLP2	black	0.983914096196753	8.40863343174137e-34	-0.145235	0.341143138779461
RPS3	black	0.975323090251428	7.64735068229233e-30	-0.183843	0.226706447993298
SERPINB3	yellow	0.734125952981961	9.54475166127667e-09	0.229261970027536	0.129793448269805
RPL38	black	0.981083220975757	2.66823039132202e-32	-0.13594	0.373253774158183
SFTA2	black	0.880465119809565	1.57779543548471e-15	-0.335992	0.0240379273468122
LCN2	green	-0.910349	4.41896440924602e-18	0.0709844355285766	0.643103755200671
S100P	black	0.834892695298031	1.01520247948616e-12	0.0765973404740622	0.616999674376759
RPS29	black	0.982806710628417	3.48031914718553e-33	-0.133835	0.380770118129175
RPL3	black	0.970100603284718	4.50303230930648e-28	-0.156155	0.305672551905069
FTH1	green	-0.982126	7.96941631376205e-33	-0.17081	0.26192532255012
SPP1	black	0.659364037883779	8.40940229696859e-07	0.196643723916924	0.195427355308629
MIR100HG	blue	0.851825456069877	1.18518048061534e-13	0.354506925242722	0.0168778018532141
RPL18	black	0.981322634200209	2.0338639821804e-32	-0.176875	0.245106676054408
COX8A	black	0.975927923165186	4.51235043737808e-30	-0.130023	0.394605041538658
EIF1AY	green	-0.336731	0.0237096987014596	0.0221079200057019	0.88538309560007
CCL2	black	0.894176392657103	1.32413932570304e-16	-0.0856058	0.576073552444214
RPL24	green	-0.98132	2.04029164398865e-32	-0.171047	0.261254399031706
UQCRB	black	0.976346591110737	3.10725756075174e-30	-0.0780145	0.610480367260218
FGG	black	0.332466717235848	0.0256550850241638	-0.282538	0.0600392546921582
RPL36AL	black	0.97856624405278	3.81781869911991e-31	-0.130812	0.391715429420873
DBI	black	0.960929463381246	1.29385701608884e-25	-0.22177	0.143161495404785
PALM2-AKAP2	green	0.969963735186508	4.96089439995843e-28	0.0158678497813935	0.917601205292568
SLC25A5	black	0.953500930785939	5.06926762829157e-24	-0.223089	0.140737937495339
HLA-DRA	black	0.969840408887944	5.41112824739963e-28	-0.084573	0.58070200846722
COX7C	black	0.972950340510594	5.37680152605279e-29	-0.104438	0.494767086366508
IGKC	black	0.74466994316689	4.49568958105251e-09	0.265700020723997	0.0777193265229174
RPL31	black	0.977112816575437	1.54238163298055e-30	-0.112144	0.463295585883329
RPL11	black	0.97661414337509	2.43953995576698e-30	-0.152182	0.318293306078429
IL6	black	0.864152377914914	2.08374092113583e-14	-0.0181122	0.905995398486343
SRP14	black	0.967253736245529	3.09353072190122e-27	-0.136931	0.369745799905146
HP	black	0.759422614881692	1.47165849288087e-09	-0.100757	0.510179080546874
PTRHD1	black	0.977653055839602	9.27830220910359e-31	-0.122989	0.42088867869982
RPS3A	black	0.980827157425087	3.55361027460498e-32	-0.159358	0.295734601586791
EEF1A1	green	-0.976241	3.41746631843786e-30	-0.150782	0.322818710046745
LMNTD1	blue	0.952214785742721	8.99731598709675e-24	0.205652767728029	0.175329201069334
RPL37A	black	0.979483055559594	1.50509062707153e-31	-0.143141	0.348224355110005
KCNMB2	blue	0.966765878626888	4.23087255846868e-27	0.288839436753402	0.054316184132099
CD52	black	0.935107179271478	5.45544436090335e-21	-0.107762	0.481058967347816
RPL13	black	0.98638958589952	2.37128558414154e-35	-0.141586	0.353541008929443
RPS28	black	0.983708845497519	1.1021312375838e-33	-0.179647	0.237668831187627
RPS16	black	0.979219356723756	1.97549431361195e-31	-0.131382	0.389638293541846
DLG2	green	0.916443569225951	1.035107923107e-18	-0.0512346	0.738198120187359
TYROBP	black	0.925573111310015	9.43848349217029e-20	-0.215242	0.155618316604782
NOP10	black	0.979446181428557	1.56376247959421e-31	-0.176036	0.247389483004228
RPL23	black	0.983852358559254	9.1249164798167e-34	-0.137282	0.36850905894375
RPL14	green	-0.979846	1.02914707680983e-31	-0.174592	0.251348274676939
RPL9	black	0.98468392044827	2.95202424041608e-34	-0.149361	0.327453884855724
C1QC	green	-0.897923	6.34017143910837e-17	-0.267603	0.0755369160025306
MGP	green	-0.930965	1.9786832949883e-20	0.0241092555752845	0.875086088805857
CFAP47	blue	0.969049395308758	9.36730333716646e-28	0.250618936636623	0.0968113768649028
TUBA1B	green	-0.943935	2.57073660133355e-22	-0.100636	0.510691144636897
MIA2	brown	0.934634818835156	6.34570841996577e-21	0.0713640298601033	0.641324436229312
RP1	blue	0.956201129419961	1.43904659428178e-24	0.292290665304943	0.0513728188957073
LTF	green	-0.792923	8.43983280589187e-11	0.0668051784041303	0.662822497857376
FOSB	black	0.836864739439005	8.00614990348692e-13	-0.0250807	0.870095232117945
RPL10	black	0.981761260356067	1.22548050236935e-32	-0.177811	0.242578721853555
NPC2	green	-0.951936	1.0165951585519e-23	-0.179579	0.237850930353417
LGALS1	green	-0.940116	1.02027068305297e-21	-0.0834152	0.585911272083246
LINC00571	brown	0.938456176704167	1.80608782474542e-21	0.129446863507905	0.39671969125024
G0S2	black	0.892613375095266	1.7858635601015e-16	-0.329305	0.0271815086691804
ATP6V1F	green	-0.983215	2.08557915027719e-33	-0.164818	0.279280210419548
ANKRD1	brown	0.311925156390998	0.0369845473973916	-0.39476	0.00728420726791734
FGFBP1	green	-0.898551	5.58871481304671e-17	-0.112565	0.461606036513951
MDK	black	0.863578406021766	2.26781940756676e-14	0.257127467070341	0.0881707060898008
S100A11	green	-0.970023	4.75620148691347e-28	-0.0426519	0.780864151118469
S100A6	green	-0.962182	6.50106252952954e-26	-0.105658	0.489710072453441
GCHFR	green	-0.971656	1.45029940165774e-28	-0.159697	0.294694477029137
LINC01091	green	0.92776355100778	5.07707776575632e-20	0.254497377022009	0.09158717197942
ALKBH7	black	0.970268962807849	3.99489424708296e-28	-0.136686	0.370612935704168
NDUFA1	black	0.973021046736657	5.08615217063319e-29	-0.0526065	0.731446112829929
RPL36	black	0.981612432509585	1.45730775523948e-32	-0.151798	0.319530109027442
B2M	green	-0.973818	2.69075139571846e-29	-0.125703	0.410630478112389
ZFY	green	0.094911778183519	0.535143503118325	0.195282606754138	0.198599972789917
SDF2L1	black	0.94648850041057	9.68229152700196e-23	-0.0514669	0.737053436851652
LYZ	green	-0.875846	3.39819009435386e-15	-0.0862507	0.573191643092285
C11orf96	black	0.803469732460337	3.07349087248504e-11	-0.314596	0.0353128098653633
RPL41	green	-0.981054	2.75597243795882e-32	-0.152988	0.315708786399348
RPS8	black	0.972172373657444	9.81592758133929e-29	-0.16746	0.271537792262716
AC098617.1	green	0.957942717133977	6.12019462288906e-25	0.0553832774914846	0.717841433723294
DCDC1	blue	0.966011816964029	6.80240883290605e-27	0.252895491902414	0.0937177450732814
HBB	black	0.668491924214556	5.21108684003684e-07	-0.272311	0.0703444661318483
CSMD1	green	0.919273010514999	5.07957597706704e-19	0.100994391841898	0.509178572298359
DNAH17	green	0.930800037998778	2.0795822616807e-20	0.0509202024837842	0.739748434338281
MUC5B	pink	0.74416584673747	4.66430343426027e-09	0.585535654296137	2.38765888921445e-05
KIAA0825	green	0.952719356292583	7.19761648836976e-24	0.203199344028157	0.180648686018235
RPL28	black	0.983361248039026	1.72931662006136e-33	-0.129441	0.396742793988097
HSPA1A	black	0.705285105051695	6.32148599902699e-08	0.10513670882604	0.49186817893864
RPS7	black	0.976681906851055	2.29352737909169e-30	-0.160419	0.29248805713926
RPL6	black	0.982108778684212	8.13145055065248e-33	-0.157943	0.300097806512208
GPNMB	green	-0.895264	1.07226589655009e-16	-0.0330701	0.829254779811343
GSTA2	black	0.685174519631555	2.07934681033041e-07	0.279364330244561	0.0630993007335908
RPL35	black	0.982922515760019	3.01308488093462e-33	-0.152945	0.315846669479866
CD63	black	0.985268636144109	1.28580247928681e-34	-0.10368	0.497921263518965
LINC00271	green	0.931614565852729	1.62553110727318e-20	0.208157978547323	0.170014716759671
PTPRT	blue	0.959930730047072	2.2041625466076e-25	0.235309218179617	0.119702796750818
DNAH3	blue	0.950702860634895	1.73137530161967e-23	0.329157184331511	0.0272549401756467
CFAP54	blue	0.967796495975138	2.17138890021442e-27	0.277154161134794	0.0653026711073191
S100A8	black	0.837511244061915	7.40145609217653e-13	-0.372629	0.011707359584075
PRKG1	green	0.927283650437187	5.82545008041655e-20	-0.0812348	0.59577704979267
MRPL51	black	0.982217592267247	7.13957051025996e-33	-0.063599	0.678105404834755
H2AFZ	green	-0.971513	1.61350077294359e-28	-0.19717	0.194209861498485
NDUFB11	black	0.973897816490508	2.52160639669654e-29	-0.137426	0.36800133135058
MRPL54	black	0.97952156454678	1.4460588659943e-31	-0.0808876	0.597354775424996
PTPRD	green	0.958418196471228	4.8157363141121e-25	0.0544407518864988	0.722449895383725
RFX3-AS1	green	0.978350514739327	4.72496186960714e-31	0.156412343574601	0.304866933763571
CXCL6	black	0.801776271009001	3.62935767427008e-11	0.151910396637606	0.319169276053984
CHCHD2	black	0.97414872671579	2.05384241474498e-29	-0.163702	0.282591395339558
CASC15	green	0.940620379606417	8.54959165578238e-22	0.21276264677411	0.160552043462128
KIAA2012	blue	0.887712114794108	4.43225936118046e-16	0.297604534046574	0.0470939
AIF1	green	-0.904561	1.59874612615978e-17	-0.188267	0.215528270756889
RPS25	black	0.984024392890046	7.26029058778879e-34	-0.186111	0.220927322979702
ADM	black	0.814813854902085	9.6679405501133e-12	-0.184969	0.223824483942111
ADGB	blue	0.901188172376429	3.25905418887375e-17	0.226619874354053	0.134396845338839
ARHGEF18	green	0.976531787628655	2.62892648206206e-30	0.0402565727321827	0.792892465128676
RPL7A	black	0.983534205382935	1.3837183493209e-33	-0.18935	0.212851193728063
STX18-AS1	green	0.963428914940982	3.20190140096595e-26	0.066546316542892	0.664051491123062
ALOX5AP	black	0.893245675323739	1.58319728015186e-16	-0.262499	0.0815015696041762
TOMM7	green	-0.977781	8.21378976169312e-31	-0.0999288	0.513680816943501
S100A14	black	0.977478554122795	1.09483382219709e-30	-0.221397	0.143852453969025
RPL10A	black	0.991301841015594	1.64225509849039e-39	-0.159032	0.29673601332688
TIMP1	green	-0.938283	1.91494760965095e-21	0.0245502153168835	0.872820000860481
COX6B1	black	0.969201606931572	8.4379725065565e-28	-0.0742549	0.627839515284052
DYNLL1	green	-0.968433	1.42271416356792e-27	0.0318774468314511	0.835326066184223
BTF3	black	0.967378751486423	2.85285043203002e-27	-0.0947777	0.535723210954641
FAM160A1	brown	0.950018064288319	2.31326059936391e-23	0.102918138463696	0.501101320531987
LAGE3	black	0.962903261211781	4.32900525715236e-26	-0.1562	0.305530769167053
ALDOA	black	0.990185098030681	2.1803715959319e-38	-0.163257	0.28392014041769
SDK1	blue	0.950138538312831	2.19895127700242e-23	0.272621092992076	0.0700131051445261
CROCC2	blue	0.91491438195514	1.50508033510228e-18	0.241987453230993	0.10926059797134
FTX	brown	0.970152785665349	4.33930080517909e-28	0.176564756298697	0.245948913782218
RPS21	black	0.978905628768792	2.71795137928208e-31	-0.135139	0.376101687085825
PTCHD1-AS	brown	0.88982020391997	3.01375437514933e-16	0.242192796583458	0.108950906621329
RPL37	black	0.98094232861302	3.12539980419706e-32	-0.139245	0.361634786340911
DNAH12	blue	0.964930970462516	1.31917024497589e-26	0.327675988072356	0.0279973967935083
HLA-DPA1	black	0.967932941364381	1.98463487961228e-27	-0.0718581	0.639011442162949
S100A4	green	-0.928377	4.25332626968103e-20	-0.210476	0.165202015901323
COMMD6	black	0.96967513459953	6.07580339098387e-28	-0.0216137	0.887928602105932
TRMT112	black	0.970658465708421	3.02029384986601e-28	-0.132022	0.387311375707634
CFAP61	blue	0.968898834152835	1.03818992116594e-27	0.301716871491597	0.043984957765641
TACSTD2	green	-0.912616	2.60770932620439e-18	-0.0119802	0.93774322583263
UQCR10	green	-0.972835	5.88540279622782e-29	-0.110222	0.471042301669091
SOX5	green	0.948759502987903	3.89896645508365e-23	0.298874593344971	0.0461152860313378
RPS11	black	0.987290515981267	5.48726454768261e-36	-0.130426	0.393125945280933
SFTPA2	black	0.871198540132153	7.13547948208695e-15	-0.285798	0.0570212579146694
PCAT1	green	0.961455464693296	9.71858848027512e-26	0.116396845879377	0.446397164845559
MT1X	green	-0.916373	1.05321041163666e-18	-0.137629	0.367287551848487
CDRT4	green	0.973879664167625	2.55911840120243e-29	0.163528254591092	0.283110787730289
WFDC2	green	-0.951337	1.31929361669676e-23	0.0803963707019151	0.59959018330487
WDR49	blue	0.974769447678479	1.22546916003324e-29	0.339505206486089	0.0225119296845341
SEC61G	black	0.988595298119626	5.41366399165155e-37	-0.150326	0.324302870512718
NDUFB3	black	0.972364976666807	8.4705211831685e-29	-0.0602155	0.69437279220688
OST4	black	0.980810081618373	3.62166998148649e-32	-0.111723	0.464983906603285
PSCA	black	0.684978064952201	2.102698842648e-07	0.251213682333456	0.09599567296902
RBFOX1	green	0.931197038938888	1.8450040672121e-20	0.166355923892961	0.274754607326732
EEF1B2	green	-0.977899	7.33353318971347e-31	-0.164992	0.278766068757293
SSR4	black	0.977738469049187	8.55221481836332e-31	-0.101413	0.50741358543947
DANT2	green	0.968388982057211	1.46522853260821e-27	0.0574525381335004	0.70775869370553
C12orf74	blue	0.93003692679156	2.61233071478001e-20	0.295134283217744	0.0490456168869897
SAA2	green	-0.751991	2.60797448663994e-09	0.061918341256684	0.686168130635322
SPCS1	black	0.968581158758375	1.28764454360423e-27	-0.0654924	0.669064159289156
C8orf37-AS1	blue	0.936914807635925	3.0266572898546e-21	0.233839739140799	0.122098482709884
HHIP-AS1	black	0.811429932794401	1.3761979426762e-11	-0.402298	0.00615203867738716
SERTAD1	black	0.978839736583875	2.90455820363311e-31	-0.135466	0.374937471761169
CCDC187	blue	0.926952140028682	6.40239331673953e-20	0.287905229333667	0.0551358296150291
COX7A2	black	0.976140012749246	3.73837539753932e-30	-0.125237	0.41238239134907
PGC	black	0.676128406162641	3.44714017312122e-07	-0.210713	0.164715273283995
TOMM22	black	0.976891256059522	1.89319406002566e-30	-0.119713	0.433460908605763
BBS9	blue	0.899606231639559	4.51174297190899e-17	0.195277248073573	0.198612534647402
OAZ1	black	0.971606084175226	1.50521068671042e-28	-0.179814	0.237226971002115
POLR2J	green	-0.980219	6.91538279830946e-32	-0.0771293	0.614549114501578
CHI3L2	black	0.684316456692552	2.18315058256941e-07	-0.370371	0.0122666127028273
ANAPC11	black	0.982723104710178	3.85971524264212e-33	-0.0764956	0.617468898646628
RPS9	black	0.982042895721977	8.79440097732419e-33	-0.166702	0.273744610599283
SCGB2B2	brown	0.927528783048311	5.43097755046287e-20	0.0917145806197372	0.549044714978095
TBL1Y	blue	0.470632063893267	0.00110400843563272	0.18639503318366	0.220210534008464
SF3B5	black	0.969698133623865	5.97886303047994e-28	-0.118083	0.439793161535687
MRPL23	green	-0.958032	5.85215167109175e-25	-0.165179	0.278211473049999
TSPO	black	0.963143997293022	3.77258059638272e-26	-0.0634614	0.678764041693864
BTBD9	brown	0.976274435864899	3.31518167597227e-30	0.146353211525865	0.337398179344625
ANKFN1	blue	0.973843410109945	2.63563446803967e-29	0.304366005693983	0.0420722145689937
MT-ND5	green	-0.802082	3.52232374231472e-11	0.0952634655288713	0.533624908318802
MYO16-AS1	brown	0.721326294043773	2.27337793245302e-08	-0.366466	0.0132879959249665
GKN2	black	0.891072054279766	2.38790354528269e-16	-0.375343	0.0110639005189076
GAPDH	black	0.976394281321499	2.97671545648593e-30	-0.12271	0.421950235628962
ADIRF	green	-0.913161	2.29227482855007e-18	-0.186346	0.220334425174477
RPL4	green	-0.981392	1.87951539571768e-32	-0.19337	0.203119359739175
MROH9	blue	0.941849979085619	5.51999049623922e-22	0.293350569122134	0.0504951927366631
NDUFA2	black	0.974361319847904	1.72336526161773e-29	-0.0907155	0.55342369173157
DAB1	green	0.949262254972601	3.17009691644414e-23	0.117852815086895	0.440691297548886
SOD1	black	0.966111134342064	6.39391970066216e-27	-0.00387343	0.979853465701622
SERPINI2	blue	0.970498486578868	3.38946475132567e-28	0.266667098680151	0.0766041677271391
SH3BGRL3	green	-0.959632	2.57754028904552e-25	-0.0902326	0.55554590190013
GADD45GIP1	black	0.983041185162629	2.59662738848428e-33	-0.135254	0.375692924029604
LINC00894	brown	0.92689140642413	6.51381018575716e-20	0.207816715737746	0.170731727951367
MT1F	green	-0.934102	7.51619308604359e-21	-0.185337	0.222887373413328
RNASE1	green	-0.933638	8.69888126617064e-21	-0.0691218	0.651863169594994
KRT10	black	0.96524852741686	1.08827112189194e-26	0.017134512998543	0.911049037645801
CCDC85B	black	0.945297405644954	1.53581886415818e-22	-0.166238	0.275100724003353
NDUFC2	black	0.978254709054388	5.19058263768105e-31	-0.17062	0.262464894172378
AGR2	green	-0.956235	1.41578081809915e-24	0.0767115730435982	0.616473085376981
SFTPA1	black	0.804217978038602	2.854364958547e-11	-0.325119	0.0293184770189006
DNAH9	blue	0.939635072031658	1.20587483732107e-21	0.33426735127581	0.0248180690631146
PIP	black	0.695612866651537	1.13431518177375e-07	0.280797625616108	0.0617023808874894
C19orf53	black	0.977152377521207	1.486648111857e-30	-0.114244	0.454909533413728
UQCRQ	black	0.983488542700577	1.4679466981485e-33	-0.155078	0.309062689950996
ST6GALNAC5	green	0.873786962107691	4.7376045023493e-15	-0.0417719	0.785277483007081
RPSA	black	0.983407581983859	1.6294280020441e-33	-0.191493	0.20762509213781
ANKS1B	brown	0.948263211255946	4.77297658506582e-23	0.00982400333424133	0.948931664429371
LINC01435	blue	0.866632231700573	1.43899328352991e-14	0.212000080136634	0.162092005663181
AC234582.1	green	0.902738866261391	2.35668266064272e-17	0.241811636500148	0.109526291454627
ESRRG	blue	0.96958365142365	6.47642379674051e-28	0.292312221395604	0.0513548480545374
RAD51B	blue	0.916175933230143	1.10576294684578e-18	0.242158581259938	0.109002462376515
RPL22	black	0.977884137168674	7.43712506656871e-31	-0.0950459	0.534564307700034
CNTN6	brown	0.844902787561671	2.94103616459145e-13	0.0230577827356711	0.880493553781168
IFITM2	green	-0.960915	1.30411730506332e-25	-0.191818	0.206840167200476
TSPAN8	black	0.757954529081292	1.65043750767018e-09	0.306151711166647	0.0408216088695743
KANTR	green	0.960646961486204	1.50637755168976e-25	0.0418445348457772	0.784913026387143
STPG2	brown	0.925869222213976	8.6892649223531e-20	0.180120426267761	0.236414326154977
TMEM232	blue	0.957999956824466	5.94698433300257e-25	0.265806691383535	0.0775957001208503
EGR1	black	0.909302516733862	5.61148603007125e-18	-0.0620004	0.685773708626169
CLDN3	green	-0.914196	1.79012328387105e-18	-0.0200035	0.896230425170568
EFCAB6	blue	0.940517674162245	8.86405711571718e-22	0.209417884812988	0.167386442884781
MT1E	green	-0.921849	2.59634577743707e-19	-0.224209	0.138703298819222
DDT	black	0.970931668348795	2.47673058030791e-28	-0.14823	0.331169439619422
LRGUK	blue	0.961850671809236	7.81775581508735e-26	0.210411888190018	0.165333738758255
UBL5	black	0.974633533606878	1.37366740603002e-29	-0.147281	0.334311546062764
COX6C	black	0.95628522874969	1.38195477221322e-24	-0.105547	0.490168319051995
CCSER1	brown	0.953756402627775	4.51454084401751e-24	0.072110470116885	0.637831353516474
BOLA3	black	0.979005291049966	2.45725446646954e-31	-0.0488805	0.749829827019662
DYNLRB1	black	0.974489970349919	1.54867396523446e-29	-0.0566122	0.711847520334089
TMEM258	black	0.983566528838528	1.32690068764933e-33	-0.147607	0.333231290013301
KRT17	yellow	0.843225613073797	3.64123247204011e-13	0.394820088838905	0.00727446639758032
EIF1	black	0.973809861046985	2.70837842535181e-29	-0.222108	0.14253863915034
LY6E	green	-0.962484	5.48841666848314e-26	0.0800245267328814	0.601284698811949
CYP2F1	black	0.61119176949917	8.21356982704096e-06	0.261882763610352	0.0822460821942389
MRPS12	black	0.963315773830457	3.41791348496596e-26	-0.216316	0.153516439910965
LINC00882	blue	0.915058720209395	1.45326671932419e-18	0.196991012227419	0.194623635453872
MUC16	blue	0.754941208996942	2.08310845175991e-09	0.455076382431862	0.00168443356510424
SOD3	green	-0.937532	2.46545305066942e-21	-0.179237	0.238758060676275
ECT2L	blue	0.962351278419103	5.91440400872539e-26	0.301442186703766	0.044187274387492
MZT2B	black	0.982157458940543	7.67248802887584e-33	-0.0747527	0.625529089974274
CEBPB	black	0.951252987412769	1.36772964001864e-23	-0.130417	0.393159590876769
TXNDC17	black	0.969617382120126	6.32586967101901e-28	-0.13922	0.361720631164936
TIMM10	black	0.955479136855193	2.03050715425346e-24	-0.163258	0.283919248080707
NACA	black	0.979506484903659	1.46890730874727e-31	-0.149094	0.328329548535315
RPLP0	black	0.977719640085458	8.70746878032005e-31	-0.181732	0.232176467131088
HIGD2A	green	-0.9774	1.17903457339611e-30	-0.117467	0.442197588223733
SAP18	black	0.966195377761876	6.06583866490518e-27	-0.124708	0.41437478140078
PCBP1	black	0.976199385472839	3.5454753174061e-30	-0.13579	0.373786668401695
RPS26	green	-0.949302	3.11799588930176e-23	-0.184264	0.225625641159005
ACOXL	green	0.817738905192447	7.08356300700543e-12	-0.212902	0.160271360018831
LAMTOR2	black	0.956847822909108	1.05193120491357e-24	-0.0865855	0.571698073653121
DOCK4	green	0.959440646987823	2.84859593560112e-25	0.167054741480238	0.272714800597649
AADACL2-AS1	blue	0.914923080924645	1.50190860913862e-18	0.255504810898937	0.0902665998217066
CFL1	black	0.990886346967528	4.46032690406534e-39	-0.136293	0.372003297195388
MIR646HG	green	0.912736908639762	2.5343541492719e-18	0.135066112111544	0.376362752685015
DUSP2	black	0.907770697674566	7.91883956707858e-18	-0.0837105	0.584580391228071
CXCL3	green	-0.916541	1.01039252968298e-18	-0.0615806	0.687792728744278
TNNC1	black	0.849919374947053	1.5290836012287e-13	-0.35463	0.0168370475953836
TMEM160	black	0.967267662536481	3.06579252638001e-27	-0.13424	0.379314538636502
CPB2	turquoise	0.869795659772701	8.87627660939869e-15	-0.391783	0.007778518026177
ZBBX	blue	0.881809434267732	1.25456485560173e-15	0.286551614442291	0.0563410633168439
GRIP1	blue	0.876505729065736	3.05133112600078e-15	0.305462594274208	0.0413005771608187
VKORC1	green	-0.952758	7.07452314072887e-24	-0.159165	0.2963283068743
WWOX	brown	0.980492825582868	5.13634191174469e-32	0.179270105979252	0.238671192678156
ZDHHC12	green	-0.962799	4.5938921914528e-26	-0.171453	0.260107128570304
TCEAL8	black	0.973830295074553	2.66384727065146e-29	-0.154133	0.312057256638887
POLR2K	green	-0.946926	8.15170185456568e-23	-0.121057	0.428276195318318
CFD	green	-0.918807	5.72185655239744e-19	-0.0975981	0.523597393499318
LINC01376	brown	0.954373485671704	3.40296178493624e-24	0.175061639488621	0.250056667748586
PRDX1	black	0.959172741365564	3.27297298198074e-25	-0.184993	0.223763130566524
LAMTOR5	black	0.972410484298545	8.17932345877208e-29	-0.202173	0.182908191200739
DNAH6	blue	0.95946442674439	2.81357100626554e-25	0.291208719665183	0.0522813563297957
FAM3D	black	0.577182766815946	3.31521611151828e-05	0.274222462236571	0.0683192909470103
NEK10	blue	0.953765354066858	4.4961922472295e-24	0.309000855407553	0.0388892698848895
NRG3	green	0.81324473621023	1.13978990663145e-11	-0.259165	0.0855933762836609
KLF4	black	0.936750681202543	3.19525366314783e-21	-0.101182	0.508387078992735
JUNB	black	0.951363331960518	1.30412809452095e-23	-0.123972	0.417156915706535
ULK4	green	0.930775715589472	2.09483859068776e-20	0.219823716659123	0.146796130468695
CDC20B	blue	0.585011666841351	2.43797726350003e-05	0.13924905617784	0.361621068466359
AQP5	black	0.66586086757307	5.99194346066647e-07	0.328527020460988	0.0275687850315241
RPL5	green	-0.979921	9.5074451118108e-32	-0.154801	0.30993801703111
NLGN4Y	blue	0.509268579381685	0.000353251984648194	0.405945616869375	0.00566140254114021
SNRPD2	black	0.986015389047908	4.2328373192118e-35	-0.153855	0.312941452446562
DNAH11	blue	0.946036338870347	1.15497703018459e-22	0.21036632107684	0.165427437313465
CFAP126	black	0.796825633532788	5.84772897751886e-11	0.0848713184658514	0.579363485270718
PMAIP1	green	-0.931492	1.68700214749101e-20	-0.0750399	0.624198087211704
C4orf3	green	-0.969958	4.98127610911279e-28	-0.0746791	0.625870438565289
C20orf85	yellow	0.930933034982018	1.99800899870116e-20	0.249667115761273	0.0981279280261929
LINC01515	green	0.940617673046948	8.55774081730491e-22	0.260744573532035	0.0836349827290306
BCAS3	blue	0.915269132973619	1.38075877883269e-18	0.273741335606295	0.0688247416701743
RGS2	black	0.891289979627861	2.29241373443957e-16	-0.154397	0.311216508629121
FGF14	blue	0.955058191147805	2.47540559653549e-24	0.338074319488761	0.0231233316869914
POLR2L	black	0.984893399115612	2.20003095143479e-34	-0.1117	0.465078653430901
C12orf57	green	-0.978271	5.10997681153674e-31	-0.0951829	0.533972510557965
IGHA1	black	0.532636319216512	0.000165590397233686	0.352300271862835	0.0176227825606224
MAGEH1	black	0.938352491402348	1.87069395073985e-21	-0.215046	0.156004974993763
PFN1	black	0.988490030391527	6.58917901005789e-37	-0.146011	0.338540759678815
H3F3A	black	0.968754979346529	1.14484100637609e-27	-0.0618432	0.686529622494002
CYCS	green	-0.971242	1.97211502456667e-28	-0.18436	0.225380407144199
VWA3A	blue	0.941208783162476	6.94274342576145e-22	0.304613417553634	0.0418970982342699
PRELID1	black	0.977956801632115	6.93406401966115e-31	-0.166802	0.273450093102085
COX4I1	black	0.974678421207551	1.3229308079201e-29	-0.15312	0.315283943994679
TMEM190	yellow	0.91418272143764	1.79585046572402e-18	0.20632068225143	0.173900762241038
FBXL13	blue	0.950688319169776	1.74213503052003e-23	0.227580408202428	0.132709401495502
PTP4A1	green	-0.885896	6.14205866507831e-16	0.078765723335242	0.607036553139457
FAM155A	brown	0.706427209321241	5.89073873047547e-08	0.302726392903666	0.0432478739811867
KRT23	yellow	0.846709540717621	2.33000656165503e-13	0.292895523089139	0.0508704859034069
PTMA	green	-0.97453	1.49767546387889e-29	-0.0748411	0.625119524375603
LINC01572	blue	0.856681378347765	6.09238314717315e-14	0.186091927118782	0.22097515242832
C4orf48	green	-0.942346	4.61431710949561e-22	0.0212437658246871	0.889835106665242
NHP2	black	0.971609636585906	1.50121992850022e-28	-0.145596	0.339931604392974
TTN	red	0.915287872875749	1.37447036552689e-18	-0.343166	0.0210092484547623
COX7B	black	0.975645206859911	5.78376627757606e-30	-0.110492	0.469950741358062
GRM7	blue	0.931791839711613	1.54005897382187e-20	0.357861471939051	0.0157964316555926
S100A10	black	0.901305581319798	3.18063152275417e-17	-0.0776605	0.612105927854702
NDUFB10	black	0.975262831359623	8.05424638927333e-30	-0.0881832	0.564595912344398
UQCR11	black	0.98744828899066	4.20139668808862e-36	-0.124173	0.416397189462952
SPAG17	blue	0.941244455830918	6.85519380297006e-22	0.304089876528177	0.0422683616920059
GPR39	green	0.953887072203324	4.25363074725826e-24	0.154530096373508	0.310795977414266
SNRPD3	black	0.951843337322003	1.05876254831969e-23	-0.148072	0.331691353747256
CLCA2	yellow	0.734518005737167	9.28714630710018e-09	0.300297826626999	0.0450383103985515
NXT1	black	0.955598214610796	1.91917256954472e-24	-0.180132	0.23638317617827
CFAP46	blue	0.931995591058761	1.44709736268694e-20	0.310273523742813	0.0380506775402216
DRAIC	blue	0.955240628400597	2.27225721017165e-24	0.305510322536216	0.0412672565076731
LINC00472	brown	0.949519169090178	2.84964651712456e-23	0.135931437218664	0.373284172260343
TAPT1-AS1	blue	0.869001991221648	1.00319187795932e-14	0.200502133738812	0.186629060648024
FRMD5	green	0.912299244389032	2.80958302964317e-18	0.359878642297576	0.015174918365256
BRK1	black	0.968046243577837	1.84127999271575e-27	-0.0483337	0.752539633174597
CACNA2D3	green	0.894214479866826	1.31444588708933e-16	-0.127524	0.403829679041264
CNTN4	green	0.928014026103254	4.7237055494632e-20	-0.104336	0.495192310399965
RPS24	green	-0.962861	4.43398800946664e-26	-0.0952277	0.533779244619225
IFI27	green	-0.921034	3.21847522038905e-19	0.009687946245054	0.949638019858678
LUM	black	0.748543276927055	3.37819211314385e-09	0.108403853540708	0.47843320272504
CH25H	black	0.775380333510869	4.00744447179182e-10	0.163379442992255	0.283555098854903
PLEKHA7	brown	0.955925768734712	1.64209740332209e-24	0.158634602955274	0.297960713937098
SLC25A6	black	0.979002898908235	2.46322279939655e-31	-0.181707	0.23224248891221
CA2	black	0.755011659900665	2.0718789880707e-09	-0.43238	0.00301487139634054
DLGAP1	green	0.850740939344569	1.37065418690381e-13	0.0975087009534552	0.523979718980136
KCNQ5	blue	0.842572884490749	3.95414474297162e-13	0.334819376119365	0.0245660784268779
TTC34	blue	0.950457911558778	1.92134717972154e-23	0.250736334397229	0.0966499417548934
TFPI2	black	0.817179949049343	7.52055774489223e-12	0.0702454558998028	0.646573327170687
PTCHD4	blue	0.802558987845968	3.36160134452624e-11	0.593471507929291	1.73323267934289e-05
RNF5	green	-0.97847	4.20157211076983e-31	-0.0828759	0.588344534471554
CXCL1	green	-0.881044	1.42994893319118e-15	0.116335453222294	0.446638647286881
CLU	black	0.85991933813541	3.85601198064701e-14	0.228539317641302	0.131040645863115
KAZN	green	0.944215222967338	2.31491129856438e-22	0.317597817797839	0.0335080438360901
EIF5A	black	0.981515580668814	1.63000422759306e-32	-0.197854	0.192636901860313
EYA1	blue	0.959198614116386	3.22950166881736e-25	0.330907813234896	0.0263986301324026
SERPINB11	pink	0.569106577454937	4.51518418609659e-05	0.296967942313195	0.0475907528648946
RHOV	black	0.699846834157202	8.80663183470456e-08	0.336552967919273	0.0237885797912194
VWA3B	blue	0.895607974917794	1.00265882165467e-16	0.319584970290673	0.0323558970871308
XKR6	brown	0.955739596921532	1.7945225766408e-24	0.126439260722482	0.407873521206723
PDE4D	green	0.946577500327104	9.35025677969992e-23	0.110784679465816	0.46876615047845
GPC6	green	0.883881568839863	8.76295886810286e-16	0.11374700361024	0.45688509012382
TMEM132D	green	0.851668882747622	1.21040716016662e-13	0.240116176903558	0.11211380434445
MT-ND6	green	-0.839666	5.68261285783242e-13	0.0515979270152349	0.736408184077183
COX5B	black	0.977914112977724	7.22552667383279e-31	-0.0710183	0.642945071786749
TMA7	black	0.990017593154584	3.13202123762134e-38	-0.0999913	0.513416058617177
FBXL7	green	0.950100926802586	2.23404829704992e-23	0.10862826538382	0.477517544660537
[truncated: 6,538 more rows]

## Sheet: Table S4(MM_GS_Macrophage)
Table S4: MM and GS in Macrophage cell
Gene	Module	MM	p.MM	GS	p.GS
[truncated: 7,000 more rows]

## Sheet: Table S4(MM_GS_SM)
Table S4: MM and GS in SM Cell
[truncated: 6,603 more rows]

[truncated: 1 more sheets: Table S4(MM_GS_T Cells)]
