# Supplementary material
Source: Research Square preprint supplement (doi:10.21203/rs.3.rs-9392286/v1)
Supplement: Supplementary file 13 [file 81f64e3725090f4310bd99da.xlsx]

## Sheet: Table S12(test_celltype_score)
Table S12: ssGSEAof the Relevant Three Cells in the Test Set
sample	B_cell__ExpoA_ssGSEA	Endothelial_cells__ExpoA_ssGSEA	Epithelial_cells__ExpoA_ssGSEA
GSM3891623	6.16048295776917	9.58357953162686	9.1227248907026
GSM3891625	5.77610511329199	9.46341812715762	8.88019943920845
GSM3891627	5.75146156864002	10.2524715373475	8.98024593728573
GSM3891629	6.52179123303739	10.4634181271576	9.19811851219019
GSM3891631	5.52179123303739	9.5783877549053	8.19811851219019
