# Supplementary material
Source: Research Square preprint supplement (doi:10.21203/rs.3.rs-9392286/v1)
Supplement: Supplementary file 14 [file 9be1558686c6a3414ffe9abc.xlsx]

## Sheet: Endothelial_cells
Table S2: The differential genes of Endothelial cell in the training set
gene	logFC	Z	P.Value	adj.P	k
MDK	2.78531	10.2745	9.18E-25	1.79E-21	2
IGFBP7	1.37236	8.00729	1.17E-15	1.15E-12	2
BLVRB	-1.20118	-7.74265	9.74E-15	6.34E-12	2
TALDO1	-0.839102	-6.6024	4.05E-11	1.98E-08	2
MGP	1.67468	6.42775	1.30E-10	5.06E-08	2
CLU	1.45844	6.36582	1.94E-10	6.30E-08	2
HPCAL1	-1.12006	-6.34257	2.26E-10	6.30E-08	2
IGFBP4	1.44491	6.30424	2.90E-10	7.07E-08	2
ATP6V1D	-0.772929	-6.09985	1.06E-09	2.30E-07	2
USP16	-0.680765	-5.89116	3.83E-09	7.49E-07	2
PTGDS	1.49474	5.80009	6.63E-09	1.18E-06	2
ACAA2	-0.781104	-5.77652	7.63E-09	1.24E-06	2
CISD1	0.756892	5.62369	1.87E-08	2.81E-06	2
TAOK3	-0.649806	-5.60976	2.03E-08	2.83E-06	2
EMP2	-1.17286	-5.57875	2.42E-08	3.15E-06	2
TKT	-0.785988	-5.55212	2.82E-08	3.44E-06	2
PDLIM1	0.970585	5.532	3.17E-08	3.52E-06	2
ACTG1	0.683599	5.52785	3.24E-08	3.52E-06	2
POSTN	2.92063	5.49046	4.01E-08	4.11E-06	2
C12orf75	1.10624	5.48187	4.21E-08	4.11E-06	2
ANXA5	-0.658847	-5.45596	4.87E-08	4.53E-06	2
BLVRA	-0.707563	-5.16596	2.39E-07	2.12E-05	2
NARS	-0.711974	-5.13082	2.88E-07	2.45E-05	2
PDE4DIP	-0.857851	-5.09274	3.53E-07	2.87E-05	2
SFTA2	-1.04081	-5.04611	4.51E-07	3.52E-05	2
UGCG	1.28397	4.92333	8.51E-07	6.39E-05	2
ISOC2	0.809258	4.90822	9.19E-07	6.54E-05	2
IGFBP2	1.52052	4.90433	9.37E-07	6.54E-05	2
PTPN1	-0.738897	-4.88222	1.05E-06	7.06E-05	2
LPCAT1	-0.825806	-4.86713	1.13E-06	7.37E-05	2
IFI16	0.797936	4.85248	1.22E-06	7.68E-05	2
MLX	-0.595625	-4.82149	1.42E-06	8.70E-05	2
IDI1	-0.924047	-4.79126	1.66E-06	9.81E-05	2
IP6K2	0.431707	4.71489	2.42E-06	1.39E-04	2
SPRY1	1.72373	4.67982	2.87E-06	1.60E-04	2
PEBP1	-0.565807	-4.63239	3.61E-06	1.96E-04	2
GDF15	1.28528	4.62106	3.82E-06	2.02E-04	2
GNB4	0.772262	4.61501	3.93E-06	2.02E-04	2
MRPL14	-0.691283	-4.60832	4.06E-06	2.03E-04	2
SFTPD	-1.40446	-4.60008	4.22E-06	2.06E-04	2
CAT	-0.774924	-4.57271	4.81E-06	2.28E-04	2
SBDS	-0.812108	-4.56892	4.90E-06	2.28E-04	2
CD302	-0.712552	-4.54453	5.51E-06	2.50E-04	2
CYCS	-0.763182	-4.53007	5.90E-06	2.57E-04	2
SPARC	1.20682	4.52897	5.93E-06	2.57E-04	2
HSD17B4	-0.66507	-4.51676	6.28E-06	2.67E-04	2
EIF1B	-0.684449	-4.48148	7.41E-06	3.08E-04	2
RWDD1	-0.441923	-4.46755	7.91E-06	3.22E-04	2
PTMS	0.806713	4.40236	1.07E-05	4.27E-04	2
PRSS23	0.873319	4.39017	1.13E-05	4.42E-04	2
MARCKS	0.984903	4.35462	1.33E-05	5.10E-04	2
FTH1	-0.853504	-4.33977	1.43E-05	5.36E-04	2
SHISA5	0.72592	4.31816	1.57E-05	5.80E-04	2
EVI2B	-0.974767	-4.30287	1.69E-05	6.10E-04	2
MRPS15	-0.495433	-4.28539	1.82E-05	6.42E-04	2
HOPX	-1.08544	-4.28321	1.84E-05	6.42E-04	2
INSIG1	-0.824248	-4.27418	1.92E-05	6.57E-04	2
VPS35	-0.509558	-4.24767	2.16E-05	7.27E-04	2
S100A16	0.732241	4.23425	2.29E-05	7.59E-04	2
RIOK3	-0.519305	-4.22438	2.40E-05	7.80E-04	2
SYAP1	-0.569755	-4.19638	2.71E-05	8.68E-04	2
SERP1	-0.440244	-4.18584	2.84E-05	8.95E-04	2
SAMSN1	-1.03059	-4.17605	2.97E-05	9.09E-04	2
EID1	0.540977	4.17501	2.98E-05	9.09E-04	2
LY96	0.849536	4.12709	3.67E-05	0.00110382	2
ADH5	-0.59733	-4.12288	3.74E-05	0.00110405	2
EIF2S3	-0.432134	-4.12007	3.79E-05	0.00110405	2
SCCPDH	0.535904	4.11412	3.89E-05	0.00111624	2
BTG3	-0.728977	-4.09302	4.26E-05	0.00120518	2
PON2	-0.579736	-4.08391	4.43E-05	0.00123554	2
SOX4	1.1122	4.0682	4.74E-05	0.00130322	2
BCL2A1	-0.714468	-4.03814	5.39E-05	0.00144243	2
PFDN5	-0.449048	-4.03797	5.39E-05	0.00144243	2
DCTN6	-0.494539	-4.0205	5.81E-05	0.00152553	2
GPX3	-0.701786	-4.01844	5.86E-05	0.00152553	2
ARID5B	0.800176	4.00757	6.13E-05	0.00157644	2
NDUFA8	0.620173	4.0034	6.24E-05	0.00158366	2
RNPEP	-0.525419	-3.98674	6.70E-05	0.00167725	2
IDH1	-0.698482	-3.97891	6.92E-05	0.00171155	2
FTL	-0.966751	-3.97549	7.02E-05	0.0017146	2
IL18	-0.840064	-3.95677	7.60E-05	0.00183173	2
SERPINF1	1.0052	3.93523	8.31E-05	0.00197963	2
MKNK1	-0.377363	-3.92966	8.51E-05	0.00200161	2
RBMX	0.321587	3.9123	9.14E-05	0.00212557	2
ARL3	0.435985	3.90774	9.32E-05	0.00214061	2
MARCKSL1	1.08163	3.88257	1.03E-04	0.0023416	2
MYL12A	-0.578006	-3.87843	1.05E-04	0.0023416	2
SPAG9	-0.499766	-3.87756	1.06E-04	0.0023416	2
VEGFA	-0.8032	-3.87313	1.07E-04	0.0023578	2
GHITM	-0.477397	-3.85937	1.14E-04	0.00246688	2
NAPSA	-1.25911	-3.84963	1.18E-04	0.00253621	2
CHCHD7	-0.688755	-3.8472	1.19E-04	0.00253621	2
CCDC12	-0.498019	-3.83447	1.26E-04	0.00262141	2
MPC1	-0.511983	-3.83381	1.26E-04	0.00262141	2
POR	-0.512019	-3.81805	1.35E-04	0.00276522	2
RPL17	-0.537584	-3.81446	1.36E-04	0.00277651	2
TMEM243	-0.543355	-3.78294	1.55E-04	0.00312051	2
APP	0.652935	3.75561	1.73E-04	0.00344608	2
ECH1	-0.450925	-3.75276	1.75E-04	0.00345031	2
NUDT4	0.702156	3.74398	1.81E-04	0.00353744	2
CXCL8	-1.06277	-3.74022	1.84E-04	0.00355521	2
PSMD11	-0.328036	-3.73681	1.86E-04	0.00355763	2
SCAMP2	-0.467077	-3.73512	1.88E-04	0.00355763	2
ALG13	0.370104	3.73056	1.91E-04	0.00358785	2
SPTSSA	-0.701573	-3.72709	1.94E-04	0.00359328	2
ZC3H15	-0.359382	-3.72537	1.95E-04	0.00359328	2
GLTP	0.494096	3.71518	2.03E-04	0.00370632	2
TPPP3	1.03668	3.70054	2.15E-04	0.00389047	2
KHDRBS1	0.358554	3.69619	2.19E-04	0.00392147	2
TAGLN2	0.569359	3.69066	2.24E-04	0.00397119	2
YTHDF2	0.358031	3.68371	2.30E-04	0.00404439	2
NAMPT	-0.621533	-3.68057	2.33E-04	0.00405787	2
MID1IP1	-0.829933	-3.67345	2.39E-04	0.00413585	2
NTAN1	0.520381	3.66504	2.47E-04	0.00421788	2
TFF3	1.18446	3.66394	2.48E-04	0.00421788	2
FUCA2	-0.49757	-3.65587	2.56E-04	0.00428315	2
TGM2	0.762774	3.6521	2.60E-04	0.00428315	2
APEX1	-0.433641	-3.65208	2.60E-04	0.00428315	2
NBEAL1	-0.470042	-3.64745	2.65E-04	0.00428315	2
GGNBP2	-0.395646	-3.647	2.65E-04	0.00428315	2
PSMC1	-0.360456	-3.64695	2.65E-04	0.00428315	2
TIMM9	0.409326	3.6395	2.73E-04	0.00437292	2
FAM3C	0.558668	3.63002	2.83E-04	0.00449983	2
MORF4L2	-0.497671	-3.5943	3.25E-04	0.00512288	2
PPIF	-0.773526	-3.57969	3.44E-04	0.00537478	2
FDPS	-0.513449	-3.57201	3.54E-04	0.00549086	2
DAZAP2	-0.448968	-3.56923	3.58E-04	0.00550576	2
GPRC5A	-1.08657	-3.55535	3.77E-04	0.00575495	2
MIF	-0.54297	-3.55178	3.83E-04	0.00575495	2
HNRNPA3	-0.3273	-3.55148	3.83E-04	0.00575495	2
TNRC6B	0.423138	3.5344	4.09E-04	0.00609301	2
PIGT	0.440744	3.51224	4.44E-04	0.00657424	2
STK17A	-0.534012	-3.50702	4.53E-04	0.00665428	2
CCDC90B	0.370437	3.5037	4.59E-04	0.00668735	2
CHP1	-0.660975	-3.49753	4.70E-04	0.00679333	2
TXNIP	-0.418722	-3.49419	4.76E-04	0.00682844	2
IFNGR1	-0.747672	-3.49105	4.81E-04	0.00685863	2
MRPL23	-0.696511	-3.48568	4.91E-04	0.0069472	2
NSMCE1	0.50733	3.47612	5.09E-04	0.00714784	2
CHMP4B	0.537355	3.46063	5.39E-04	0.00751774	2
TCF4	0.843691	3.45658	5.47E-04	0.00757773	2
NFIB	0.696563	3.45326	5.54E-04	0.00760013	2
NPDC1	0.936325	3.45198	5.56E-04	0.00760013	2
PDLIM2	-0.5757	-3.44101	5.80E-04	0.00782838	2
TTC3	0.419324	3.44023	5.81E-04	0.00782838	2
DUSP6	0.783584	3.43623	5.90E-04	0.00789053	2
PRPF40A	-0.312296	-3.42046	6.25E-04	0.00830566	2
DUSP4	0.881201	3.41559	6.36E-04	0.00839834	2
RHOB	0.834524	3.41228	6.44E-04	0.00844405	2
GCA	-0.537916	-3.39369	6.90E-04	0.00885232	2
WARS	0.773771	3.39291	6.92E-04	0.00885232	2
ECHDC1	-0.488879	-3.39231	6.93E-04	0.00885232	2
NDUFA11	-0.387218	-3.39214	6.93E-04	0.00885232	2
SPP1	2.46496	3.3857	7.10E-04	0.00900384	2
SARS	-0.420872	-3.38357	7.15E-04	0.00901514	2
ADPGK	-0.347458	-3.36118	7.76E-04	0.00971621	2
BST2	0.612259	3.35165	8.03E-04	0.00994581	2
ARPC5	-0.446718	-3.34999	8.08E-04	0.00994581	2
S100A14	-0.91746	-3.34945	8.10E-04	0.00994581	2
LDHB	-0.499167	-3.33196	8.62E-04	0.0105262	2
EIF3M	-0.339487	-3.32928	8.71E-04	0.0105622	2
DAD1	0.428039	3.32217	8.93E-04	0.0107681	2
FAM49B	-0.436924	-3.30754	9.41E-04	0.011277	2
MPP1	-0.534306	-3.29705	9.77E-04	0.0116352	2
INSR	1.0084	3.29437	9.86E-04	0.0116756	2
ZFAND6	-0.433938	-3.28301	0.00102706	0.0120668	2
COX4I1	-0.356122	-3.2817	0.00103183	0.0120668	2
LSM6	-0.507475	-3.27545	0.00105495	0.0122191	2
LAMTOR5	-0.413048	-3.2748	0.00105737	0.0122191	2
PSMD2	-0.442941	-3.27232	0.00106668	0.0122542	2
RAB13	0.399055	3.2691	0.00107888	0.012322	2
ODF2L	0.406764	3.25095	0.0011502	0.0130602	2
NDUFA6	-0.542001	-3.24721	0.00116544	0.0131202	2
ADI1	-0.477863	-3.24481	0.00117529	0.0131202	2
LYPLA1	0.35427	3.24472	0.00117564	0.0131202	2
TMEM208	-0.40304	-3.23623	0.00121121	0.0134403	2
PDLIM5	0.5884	3.22943	0.00124039	0.0136863	2
RAD23A	-0.460557	-3.22537	0.00125808	0.0137376	2
CYSTM1	-0.548698	-3.22514	0.0012591	0.0137376	2
NPL	-0.863182	-3.22115	0.00127679	0.0138532	2
TAF9	-0.439459	-3.21354	0.00131107	0.0141015	2
STX12	-0.482445	-3.21288	0.00131412	0.0141015	2
RPL36AL	-0.330415	-3.20624	0.00134483	0.0143522	2
ACAT1	-0.402189	-3.19417	0.00140235	0.0148847	2
GADD45A	0.698229	3.19241	0.00141089	0.0148944	2
RPL21	-0.288696	-3.18389	0.00145309	0.0152575	2
ATP6V1G1	-0.411145	-3.17561	0.00149519	0.0156005	2
SEC13	-0.322344	-3.17435	0.00150174	0.0156005	2
SMS	-0.396378	-3.16078	0.00157349	0.0161383	2
MRPL32	-0.400105	-3.16062	0.00157432	0.0161383	2
EIF1	-0.801361	-3.1597	0.00157929	0.0161383	2
RBM17	-0.39173	-3.15772	0.00159011	0.0161383	2
PPDPF	-0.495099	-3.15647	0.00159693	0.0161383	2
SMIM20	0.511634	3.15374	0.00161192	0.0161383	2
CCT3	0.398695	3.15327	0.00161454	0.0161383	2
HPGD	-0.832771	-3.15235	0.00161961	0.0161383	2
AK2	0.29296	3.14549	0.00165809	0.0164378	2
TMEM126B	-0.387218	-3.09257	0.00198433	0.0195728	2
CD40	0.580504	3.08841	0.00201234	0.0196388	2
PRCP	0.578755	3.08767	0.0020173	0.0196388	2
ATF3	0.673278	3.0871	0.00202119	0.0196388	2
NDUFA12	-0.398787	-3.0845	0.00203895	0.019685	2
YBX1	-0.414695	-3.08346	0.00204611	0.019685	2
LUM	1.27093	3.07995	0.00207035	0.0198206	2
USP8	-0.29435	-3.06996	0.00214088	0.0203141	2
VMP1	0.56224	3.06793	0.00215545	0.0203141	2
PSMD12	-0.385879	-3.06793	0.00215548	0.0203141	2
STARD7	-0.391504	-3.06682	0.00216351	0.0203141	2
FCN3	-1.47925	-3.06322	0.00218968	0.0204615	2
HYAL2	0.755022	3.06069	0.00220831	0.0205372	2
HPRT1	0.401569	3.04916	0.00229481	0.0212406	2
NAPA	-0.397355	-3.03792	0.0023822	0.0219455	2
METTL9	0.301607	3.00802	0.00262958	0.0241106	2
NDUFB5	0.299597	2.9995	0.00270419	0.0246789	2
MTRNR2L8	1.08991	2.99455	0.00274847	0.0248223	2
PDCD4	0.521684	2.9935	0.00275797	0.0248223	2
CD46	-0.408223	-2.99349	0.00275803	0.0248223	2
C7	0.934786	2.98816	0.0028066	0.0249699	2
SLC25A5	-0.436219	-2.98784	0.00280959	0.0249699	2
ZNF655	-0.348156	-2.98749	0.00281279	0.0249699	2
LSM14A	0.273341	2.98482	0.00283743	0.0250747	2
BCL2L1	-0.354863	-2.98011	0.00288149	0.0253493	2
KDELR1	0.35957	2.97091	0.00296923	0.026004	2
IRF1	0.60346	2.9624	0.00305251	0.026614	2
FOSL2	0.628369	2.94214	0.00325955	0.0282929	2
ANP32E	-0.394261	-2.93031	0.00338623	0.0292624	2
WASF2	0.317844	2.92485	0.00344621	0.0296496	2
NDUFV2	-0.368192	-2.91731	0.0035307	0.0302432	2
PTPRC	-0.747466	-2.91491	0.00355796	0.0303436	2
STT3B	0.422714	2.90733	0.00364526	0.030953	2
STX7	-0.353369	-2.9057	0.00366433	0.0309803	2
FHL1	-0.596823	-2.9001	0.00373046	0.0314034	2
OCIAD2	0.43602	2.89008	0.00385147	0.0322829	2
PKIG	0.496805	2.88226	0.00394835	0.0328305	2
PDCD5	-0.349634	-2.88209	0.00395042	0.0328305	2
PSMA3	-0.356861	-2.88062	0.00396895	0.0328448	2
EIF4A3	-0.573942	-2.87254	0.0040719	0.033414	2
GTF2H5	0.381455	2.87253	0.00407196	0.033414	2
RABGGTB	-0.445874	-2.87023	0.00410169	0.0334673	2
MRPS5	-0.351007	-2.86938	0.00411273	0.0334673	2
MT-CO3	0.612182	2.86345	0.00419061	0.0339596	2
ZNF428	0.538034	2.85814	0.00426129	0.0343896	2
EMC3	-0.32334	-2.85577	0.00429327	0.0344468	2
TRAPPC4	0.377728	2.855	0.00430365	0.0344468	2
MGMT	0.443011	2.85323	0.00432771	0.0344917	2
OSTF1	-0.356242	-2.8515	0.0043513	0.0344917	2
CRIP2	0.611867	2.8507	0.00436224	0.0344917	2
H2AFJ	-0.324118	-2.84061	0.00450268	0.0354586	2
TM4SF1	0.824396	2.83448	0.00458997	0.0360008	2
CKS2	-0.520177	-2.82633	0.00470852	0.0366385	2
GYPC	-0.455797	-2.82631	0.00470879	0.0366385	2
HNRNPA2B1	-0.285033	-2.82162	0.00477825	0.0369216	2
TACC1	0.43655	2.8213	0.00478299	0.0369216	2
SRSF11	-0.305845	-2.81828	0.00482815	0.0370184	2
GLRX	-0.546377	-2.81793	0.00483343	0.0370184	2
MAPKAPK3	-0.474878	-2.81144	0.00493208	0.0376264	2
TSC22D1	0.408422	2.80491	0.00503309	0.0382475	2
EHD4	0.478741	2.79991	0.00511165	0.0386494	2
WBP11	-0.432048	-2.79904	0.00512555	0.0386494	2
SET	0.425644	2.78947	0.00527945	0.0396484	2
SAR1A	-0.338169	-2.78741	0.00531304	0.0396484	2
RGCC	-0.507004	-2.78706	0.00531894	0.0396484	2
MPLKIP	0.354816	2.78243	0.00539543	0.0399152	2
FOXP1	0.354076	2.78242	0.0053956	0.0399152	2
FAM107B	-0.516448	-2.77819	0.00546621	0.040285	2
HIST1H1C	-0.897919	-2.76595	0.00567568	0.0416715	2
LSM2	0.393055	2.7596	0.0057873	0.0423318	2
CCNI	0.308938	2.75335	0.00589879	0.0429864	2
DUSP23	0.463309	2.75029	0.00595425	0.0432292	2
ZNRD1	0.463451	2.74473	0.00605601	0.0438052	2
CHID1	0.489557	2.73435	0.00625045	0.044892	2
TMEM173	0.411483	2.73425	0.00625225	0.044892	2
HADHA	-0.241931	-2.72699	0.00639158	0.0456853	2
PCMTD1	0.350521	2.72606	0.00640951	0.0456853	2
ATP2A2	0.386855	2.72434	0.00644305	0.0457574	2
CORO1A	-0.674275	-2.71739	0.00657999	0.0465606	2
SFTA3	-0.89531	-2.71323	0.0066631	0.0469785	2
TAX1BP1	-0.275522	-2.70891	0.00675047	0.0474233	2
ITGB1BP1	0.24885	2.70391	0.00685278	0.0479695	2
KCTD12	0.587758	2.70033	0.00692716	0.0483169	2
OSBPL8	-0.365593	-2.69035	0.00713768	0.0496082	2
SRSF5	0.330622	2.68882	0.00717059	0.0496601	2
SFTPA2	-0.986788	-2.68597	0.00723185	0.0499074	2
SLC25A3	-0.276519	-2.68048	0.00735174	0.0504887	2
NASP	0.419812	2.67975	0.00736779	0.0504887	2
OAZ1	-0.537309	-2.67745	0.0074184	0.0505015	2
TMEM70	0.477124	2.67732	0.00742136	0.0505015	2
VAMP5	0.468531	2.67032	0.00757789	0.0513875	2
CALD1	0.427926	2.66818	0.00762632	0.0515254	2
CREG1	-0.421614	-2.6671	0.00765098	0.0515254	2
AKR7A2	0.370789	2.66203	0.00776706	0.0521274	2
ORMDL1	-0.295099	-2.65961	0.00782308	0.0522958	2
PRDX4	0.459529	2.65864	0.00784571	0.0522958	2
PSMA5	-0.314595	-2.65133	0.00801751	0.0532592	2
RPS2	-0.560992	-2.65	0.00804929	0.053289	2
LCN2	1.20562	2.64467	0.00817695	0.0539513	2
BCAS2	-0.582401	-2.64351	0.00820517	0.0539552	2
OAZ2	0.369006	2.63588	0.00839192	0.0549981	2
TRIM22	0.476717	2.63312	0.00846034	0.0550062	2
GOLGA4	-0.31353	-2.6315	0.00850097	0.0550062	2
FAM50A	-0.420645	-2.63138	0.00850377	0.0550062	2
UGP2	-0.321905	-2.6313	0.00850582	0.0550062	2
SYF2	-0.382083	-2.62869	0.00857153	0.0552482	2
PPIG	-0.228592	-2.62748	0.00860197	0.055262	2
HNRNPH2	-0.480944	-2.62298	0.00871639	0.0558135	2
SMAP1	-0.304982	-2.61758	0.00885554	0.0565192	2
RPL36A	-0.416156	-2.61261	0.00898526	0.0571603	2
RILPL2	-0.388695	-2.60797	0.00910801	0.0577531	2
IDH3B	-0.422605	-2.60577	0.00916688	0.0579383	2
TMEM14B	0.279705	2.60064	0.009305	0.058446	2
ITPA	0.411149	2.60056	0.00930707	0.058446	2
CHD2	-0.354544	-2.59831	0.00936839	0.0586425	2
CNN2	-0.504461	-2.59516	0.0094546	0.0589931	2
PEA15	0.510822	2.59113	0.009566	0.0594981	2
TDP2	-0.359387	-2.58481	0.00974318	0.0604077	2
SNX9	0.485902	2.5824	0.00981155	0.0606391	2
KRT10	0.422443	2.57934	0.00989905	0.0609869	2
DDX6	0.224166	2.57715	0.00996182	0.0610683	2
LACTB	-0.466871	-2.5767	0.0099748	0.0610683	2
SF3B6	-0.299466	-2.57297	0.0100829	0.061537	2
GRPEL1	-0.468363	-2.57017	0.0101649	0.0618443	2
MYL6	-0.353705	-2.56113	0.0104333	0.0632805	2
UROD	-0.383244	-2.55827	0.0105193	0.0636045	2
RSL24D1	-0.368558	-2.55154	0.0107249	0.0646476	2
MRPS23	-0.290557	-2.54954	0.0107865	0.0648186	2
MTIF3	0.295579	2.54682	0.0108709	0.0651253	2
ADRM1	-0.361034	-2.54046	0.0110706	0.0661191	2
SNRNP70	0.402733	2.53685	0.0111853	0.0666005	2
HSPB11	0.276221	2.53463	0.0112568	0.066822	2
MED4	-0.308473	-2.5298	0.0114127	0.067351	2
ALDOA	-0.37414	-2.52877	0.0114463	0.067351	2
TNFSF10	0.824009	2.52748	0.0114883	0.067351	2
GDI2	0.26413	2.52701	0.0115039	0.067351	2
CCDC59	-0.359114	-2.52657	0.0115183	0.067351	2
BBX	0.376756	2.51769	0.0118129	0.0688672	2
CBR1	-0.398724	-2.51657	0.0118504	0.0688807	2
MRPL47	-0.354384	-2.51247	0.0119888	0.069303	2
FIS1	0.340717	2.51232	0.0119941	0.069303	2
PIP4K2A	0.484369	2.50982	0.0120793	0.0695894	2
RNF181	-0.351167	-2.50876	0.0121157	0.069594	2
STAU1	0.210146	2.50382	0.0122861	0.0702534	2
POLR1D	-0.218873	-2.50335	0.0123024	0.0702534	2
IGFBP5	0.757864	2.49757	0.0125048	0.0710368	2
ADH1B	-0.690971	-2.49732	0.0125134	0.0710368	2
CCT7	0.318813	2.49633	0.0125487	0.0710368	2
MEAF6	-0.307472	-2.491	0.0127384	0.0719017	2
HSPB1	0.474105	2.48492	0.0129582	0.0729318	2
TRAPPC3	0.287098	2.4823	0.0130537	0.0732376	2
UQCRFS1	-0.315397	-2.48102	0.0131007	0.0732376	2
NR1H2	-0.395657	-2.48036	0.013125	0.0732376	2
RHEB	-0.314899	-2.47889	0.0131793	0.0733311	2
PFDN2	-0.345911	-2.47046	0.013494	0.0748689	2
PLEK	-0.748352	-2.4633	0.0137666	0.0761647	2
DYNLL1	0.33662	2.46228	0.0138058	0.0761657	2
MRPL33	0.280531	2.46101	0.0138548	0.0762208	2
TCEAL4	-0.347484	-2.45869	0.0139443	0.0764979	2
SPARCL1	0.722775	2.45284	0.0141735	0.0775339	2
SDCBP	-0.331856	-2.45185	0.0142126	0.0775339	2
PSMB1	-0.275084	-2.44491	0.0144888	0.0788209	2
DYNC1I2	0.271017	2.43797	0.01477	0.0800101	2
FNIP1	-0.290908	-2.4375	0.0147894	0.0800101	2
FAM177A1	-0.299962	-2.43351	0.0149531	0.0801145	2
NCOR1	-0.1767	-2.43284	0.0149808	0.0801145	2
RER1	0.330642	2.43257	0.0149922	0.0801145	2
IL6ST	0.379945	2.4319	0.01502	0.0801145	2
UBE2R2	0.250802	2.43156	0.0150338	0.0801145	2
TUBA1A	0.385145	2.42965	0.0151133	0.0801145	2
TMEM134	0.402697	2.4292	0.0151321	0.0801145	2
DYNC1H1	-0.320221	-2.42909	0.0151369	0.0801145	2
AHR	0.613402	2.4274	0.0152075	0.080271	2
MT-CO1	0.55215	2.42594	0.015269	0.0803781	2
CCT8	-0.310494	-2.42297	0.0153942	0.0807056	2
NCOA7	0.435012	2.42251	0.0154138	0.0807056	2
PEPD	-0.205534	-2.41796	0.0156076	0.0815019	2
PCGF5	-0.296863	-2.41439	0.0157618	0.0820165	2
CAPS	0.656403	2.41373	0.0157902	0.0820165	2
PNPLA8	-0.36509	-2.41236	0.0158495	0.0821064	2
OCIAD1	0.255136	2.4096	0.01597	0.0825114	2
RBX1	-0.205542	-2.40635	0.0161127	0.0826978	2
HTATIP2	-0.384147	-2.4061	0.0161239	0.0826978	2
ELOVL5	-0.370149	-2.4058	0.0161373	0.0826978	2
RCAN1	0.710238	2.40493	0.0161754	0.0826978	2
TRABD	-0.425599	-2.40346	0.0162406	0.0828141	2
TPT1	0.333872	2.38777	0.0169508	0.0861932	2
MT-ND3	1.08747	2.38402	0.0171247	0.0861932	2
HNMT	-0.445292	-2.38389	0.0171309	0.0861932	2
DBI	-0.318204	-2.38176	0.0172302	0.0861932	2
IMP4	-0.398501	-2.3815	0.0172422	0.0861932	2
RALBP1	0.262549	2.38139	0.0172476	0.0861932	2
ZNF622	-0.445358	-2.38136	0.017249	0.0861932	2
RPLP0	-0.264266	-2.3812	0.0172563	0.0861932	2
CSNK1A1	0.296559	2.37769	0.0174212	0.0867951	2
BHLHE40	0.496162	2.37313	0.0176379	0.0876509	2
SOCS3	0.53504	2.36952	0.0178114	0.0882885	2
TRA2A	0.267747	2.36289	0.0181328	0.0895611	2
PAIP1	0.237059	2.36234	0.0181599	0.0895611	2
SUN2	-0.336265	-2.35178	0.018684	0.0918541	2
TAF7	-0.333292	-2.35108	0.0187189	0.0918541	2
POLR2E	-0.340783	-2.34637	0.0189575	0.0925321	2
PIM1	-0.512632	-2.34559	0.0189968	0.0925321	2
RENBP	-0.618414	-2.34555	0.0189992	0.0925321	2
MGLL	-0.366629	-2.34019	0.0192741	0.0936376	2
ESD	-0.316386	-2.33564	0.0195102	0.0943312	2
ENO1	-0.338444	-2.33557	0.0195135	0.0943312	2
TMEM123	0.335973	2.32925	0.0198458	0.0957007	2
RPS27	-0.313664	-2.32723	0.0199532	0.0959153	2
IFT20	-0.292579	-2.32656	0.0199885	0.0959153	2
MRFAP1	0.371086	2.323	0.0201789	0.0965919	2
SLC39A1	0.436226	2.31503	0.0206115	0.0982159	2
STOM	0.521853	2.31489	0.0206188	0.0982159	2
PHF20	-0.295286	-2.31248	0.0207514	0.0986069	2
EI24	0.365023	2.30754	0.0210245	0.0996621	2
INTS6	0.343629	2.30163	0.0213562	0.10099	2
PLAC8	-0.481878	-2.29761	0.0215842	0.101821	2
EEF1A1	0.274747	2.29583	0.0216856	0.101873	2
TMEM256	0.337966	2.29559	0.0216994	0.101873	2
COX6A1	-0.275928	-2.29175	0.02192	0.102661	2
RPL18A	-0.25979	-2.28479	0.0223249	0.104307	2
RAD21	-0.280247	-2.28322	0.0224175	0.10449	2
MYC	0.662365	2.28222	0.0224765	0.104516	2
VWF	0.495802	2.27099	0.0231477	0.107243	2
CD59	0.341243	2.26995	0.0232104	0.107243	2
C9orf16	0.284072	2.26967	0.0232277	0.107243	2
THOC7	0.280428	2.26182	0.0237085	0.108967	2
ATP6V1E1	-0.261383	-2.26093	0.0237639	0.108967	2
ANXA11	-0.327557	-2.26073	0.0237757	0.108967	2
MT-ATP6	0.59416	2.25995	0.0238243	0.108967	2
POLR2F	0.258666	2.25646	0.0240419	0.109705	2
ADAMTS9	1.05059	2.2539	0.0242024	0.11018	2
GBP1	0.772765	2.24569	0.0247237	0.112292	2
RBMS1	0.328078	2.24144	0.0249978	0.113273	2
HSPA8	0.427232	2.23756	0.0252498	0.11415	2
DYNLT3	-0.402095	-2.2356	0.0253783	0.114466	2
CCPG1	-0.291168	-2.23347	0.0255183	0.114832	2
NDUFB9	-0.272367	-2.22825	0.0258641	0.116121	2
RSPH1	0.866443	2.22544	0.026052	0.116696	2
QKI	-0.409454	-2.22032	0.0263972	0.117972	2
CARD19	0.293466	2.21867	0.0265091	0.118202	2
FNBP1	0.359002	2.21683	0.026635	0.118492	2
PSME1	-0.275754	-2.2155	0.0267261	0.118627	2
NDUFS8	-0.280151	-2.21393	0.0268338	0.118835	2
ARFGAP3	-0.333667	-2.20276	0.0276116	0.122003	2
PLP2	-0.352904	-2.19743	0.0279897	0.123395	2
TOR1AIP2	-0.316645	-2.19411	0.0282275	0.124086	2
MMP19	-0.674763	-2.19347	0.0282735	0.124086	2
NDRG1	0.560928	2.18949	0.0285614	0.125068	2
ETHE1	0.300874	2.18092	0.0291891	0.127294	2
SERBP1	0.222891	2.18078	0.0292001	0.127294	2
DNTTIP2	-0.371574	-2.17856	0.0293646	0.127693	2
MT1M	-1.01098	-2.17778	0.0294224	0.127693	2
CCDC50	0.256339	2.17533	0.0296055	0.128017	2
ARID4B	0.196443	2.17503	0.029628	0.128017	2
PQBP1	-0.355974	-2.17251	0.0298174	0.128551	2
AGPAT2	-0.524083	-2.17149	0.0298938	0.128596	2
TCEA1	-0.218398	-2.16743	0.0302023	0.129637	2
HMGN2	-0.218467	-2.16518	0.030374	0.130089	2
WWTR1	0.487674	2.16197	0.0306205	0.130483	2
B2M	-0.417098	-2.16157	0.030651	0.130483	2
WAC	0.239798	2.16105	0.0306911	0.130483	2
ERLEC1	-0.237349	-2.16051	0.0307334	0.130483	2
NQO2	-0.262174	-2.15355	0.0312758	0.132498	2
COX7A2L	-0.220429	-2.15248	0.0313596	0.132566	2
COPE	-0.304883	-2.14993	0.0315604	0.133126	2
DPH3	-0.372379	-2.14453	0.0319905	0.13465	2
PSMA1	-0.318048	-2.13879	0.0324525	0.1363	2
EIF3F	-0.238166	-2.13517	0.0327467	0.137179	2
AQP1	0.488576	2.1345	0.0328021	0.137179	2
PRR13	-0.25311	-2.13353	0.0328809	0.137214	2
PAFAH1B1	-0.188881	-2.13054	0.0331273	0.137938	2
ITGAE	0.344907	2.129	0.0332543	0.137938	2
CCNH	-0.4447	-2.12862	0.033286	0.137938	2
SIVA1	-0.296748	-2.128	0.0333368	0.137938	2
EIF5	-0.281775	-2.12439	0.0336378	0.138889	2
RPL14	-0.198745	-2.12233	0.0338101	0.139101	2
MTCH2	-0.198094	-2.122	0.0338381	0.139101	2
MZT2B	0.321621	2.12123	0.0339027	0.139101	2
ACOT9	-0.198483	-2.11797	0.0341776	0.139744	2
TMSB4X	-0.327559	-2.11767	0.0342027	0.139744	2
CAPZB	0.199059	2.11514	0.0344178	0.14033	2
LDLR	-0.435235	-2.1099	0.0348673	0.141866	2
IFNGR2	-0.270252	-2.10865	0.0349747	0.142007	2
NR4A1	0.573966	2.10609	0.0351969	0.142508	2
ST13	0.206759	2.10555	0.0352438	0.142508	2
PRDX6	-0.257017	-2.10431	0.0353518	0.142649	2
CD36	-0.597436	-2.10163	0.0355858	0.143297	2
C1D	0.256013	2.1005	0.0356849	0.1434	2
METTL5	0.244167	2.09558	0.0361199	0.14485	2
MYH9	0.324084	2.09364	0.036292	0.145242	2
GLUD1	0.382549	2.08969	0.0366454	0.146269	2
TPM1	-0.365663	-2.0891	0.0366984	0.146269	2
TPM4	0.305457	2.08423	0.0371391	0.147724	2
PSMD7	-0.228396	-2.08021	0.0375059	0.148488	2
KMT2E	0.256246	2.08009	0.0375169	0.148488	2
CHIC2	-0.320077	-2.07963	0.0375592	0.148488	2
CNBP	-0.23639	-2.07841	0.0376716	0.148631	2
IGBP1	0.20772	2.07571	0.0379207	0.149313	2
SDF2L1	-0.388834	-2.06916	0.038531	0.151336	2
OXA1L	-0.240376	-2.06794	0.038646	0.151336	2
ANP32A	-0.239427	-2.06771	0.0386671	0.151336	2
MKRN1	-0.226051	-2.06381	0.039036	0.152474	2
COPS2	-0.274189	-2.06123	0.0392814	0.153127	2
NUP214	-0.164641	-2.05939	0.0394565	0.153503	2
PFDN4	0.273656	2.05823	0.0395684	0.153511	2
PCMT1	-0.213865	-2.05773	0.0396159	0.153511	2
MFGE8	-0.32544	-2.05652	0.0397327	0.153659	2
SAP30BP	-0.246846	-2.05225	0.040145	0.154689	2
PLGRKT	0.260884	2.05213	0.0401575	0.154689	2
PSMC3	-0.31297	-2.05118	0.0402493	0.154738	2
C1R	0.482458	2.04701	0.0406567	0.155867	2
AKIRIN1	0.285407	2.04609	0.0407478	0.155867	2
RPS25	-0.213843	-2.04574	0.0407823	0.155867	2
BLOC1S1	-0.271967	-2.04431	0.0409234	0.1561	2
PMVK	-0.316846	-2.04314	0.0410386	0.156235	2
MT-ND2	0.591798	2.04036	0.0413144	0.156978	2
APIP	-0.342629	-2.03548	0.0418026	0.158525	2
PPP1CA	-0.312578	-2.02999	0.042358	0.16032	2
EIF2A	-0.267353	-2.02714	0.0426484	0.161107	2
TMED3	0.344159	2.02477	0.0428912	0.161597	2
TSTA3	0.411433	2.02426	0.0429437	0.161597	2
MT-CYB	0.556883	2.02319	0.0430533	0.161698	2
WDR45B	0.252831	2.02224	0.0431519	0.161757	2
TRIB1	0.467741	2.01785	0.0436072	0.163151	2
KRT17	2.28178	2.01264	0.0441529	0.164682	2
PTBP3	0.326359	2.01233	0.0441851	0.164682	2
MGST2	0.38806	2.01056	0.0443715	0.165062	2
YWHAE	0.206544	2.00829	0.0446129	0.16528	2
HIGD2A	-0.313432	-2.00792	0.0446514	0.16528	2
DDX39A	-0.378523	-2.00762	0.0446841	0.16528	2
MT-CO2	0.417256	2.0053	0.0449307	0.165878	2
TIMM17A	-0.302531	-2.00209	0.0452749	0.166615	2
SAP18	-0.250524	-2.00185	0.0453008	0.166615	2
ODF3B	0.457433	1.99577	0.0459587	0.168717	2
NPM1	-0.223583	-1.98724	0.0468956	0.171833	2
SLC9A3R2	-0.518033	-1.98239	0.0474358	0.173443	2
AGR2	0.745983	1.9817	0.0475125	0.173443	2
OAT	0.379397	1.97626	0.048125	0.175351	2
U2SURP	-0.189992	-1.97285	0.0485131	0.176314	2
VASP	-0.326974	-1.97195	0.0486155	0.176314	2
LASP1	0.25469	1.97156	0.0486602	0.176314	2
TM9SF3	0.261164	1.96769	0.0491035	0.177409	2
VAMP8	-0.305327	-1.96622	0.0492728	0.177409	2
HSD17B12	-0.270133	-1.96577	0.049325	0.177409	2
UBXN1	-0.195028	-1.96425	0.049501	0.177409	2
PSENEN	0.370627	1.96422	0.0495043	0.177409	2
AHCYL1	-0.309309	-1.96395	0.0495364	0.177409	2
UBE2D2	-0.173348	-1.96341	0.0495981	0.177409	2
COX6B1	-0.221382	-1.96094	0.0498859	0.178112	2
TIMP3	-0.507257	-1.9565	0.0504058	0.17964	2
MT-ND5	0.455845	1.95384	0.0507206	0.180419	2
S100A13	0.337799	1.95309	0.0508093	0.180419	2
IFT57	-0.347772	-1.95162	0.050983	0.180707	2
GNG11	0.613175	1.94488	0.0517891	0.183232	2
NOP58	-0.339503	-1.94314	0.0519996	0.183644	2
MDM2	0.254313	1.94194	0.0521445	0.183824	2
SNRPD2	-0.231354	-1.93914	0.0524841	0.184687	2
RPN1	-0.234428	-1.93585	0.0528856	0.185473	2
GLA	-0.320032	-1.93576	0.0528973	0.185473	2
ZNF207	-0.167943	-1.9341	0.0531007	0.185852	2
NUDT5	-0.255516	-1.93205	0.0533538	0.186404	2
ETF1	-0.281525	-1.92885	0.0537499	0.187453	2
MT-ND4	0.431605	1.92764	0.0538994	0.187639	2
MORF4L1	-0.189705	-1.92566	0.0541467	0.187887	2
SUMF2	-0.226563	-1.92553	0.0541631	0.187887	2
COX7B	-0.267127	-1.9232	0.0544551	0.188565	2
RAB32	-0.319773	-1.9206	0.0547824	0.189363	2
UBXN4	-0.181254	-1.91906	0.0549771	0.1897	2
UQCR10	-0.254154	-1.91597	0.0553695	0.190717	2
CNIH1	0.308268	1.91369	0.0556603	0.191381	2
FAM204A	-0.174242	-1.91072	0.0560403	0.192349	2
GNB1	0.219405	1.90896	0.0562677	0.192791	2
TTC1	-0.206715	-1.90767	0.0564338	0.193021	2
CCNL1	-0.335184	-1.90258	0.0570948	0.194941	2
IDS	-0.246443	-1.89788	0.057712	0.196704	2
CACYBP	-0.358504	-1.89549	0.0580273	0.197434	2
MRPL28	-0.406313	-1.8931	0.0583443	0.198084	2
TAP1	0.462826	1.89253	0.058421	0.198084	2
NDUFA10	-0.163872	-1.88518	0.059406	0.201074	2
IL32	0.424758	1.88241	0.0597805	0.201847	2
MYL9	-0.42037	-1.88196	0.059841	0.201847	2
SPCS2	-0.237609	-1.8806	0.060027	0.202125	2
MRPL50	0.343886	1.8717	0.0612475	0.20588	2
SNX2	-0.253486	-1.86961	0.0615381	0.206501	2
NUDT16	-0.280411	-1.86683	0.061926	0.206857	2
SPAG7	-0.280363	-1.86676	0.0619346	0.206857	2
SLC25A6	-0.188254	-1.86657	0.0619619	0.206857	2
ARL2	0.245354	1.86013	0.0628677	0.209523	2
LAMTOR1	-0.265822	-1.85786	0.063189	0.210046	2
HES4	0.789038	1.8575	0.0632395	0.210046	2
METAP2	-0.196372	-1.85536	0.0635453	0.210614	2
ZNHIT1	0.224879	1.85479	0.0636264	0.210614	2
PRNP	0.36379	1.85296	0.0638878	0.211122	2
RSL1D1	-0.246239	-1.85197	0.0640298	0.211233	2
SF3B2	-0.216061	-1.85007	0.0643034	0.211778	2
SLC3A2	-0.317906	-1.8493	0.0644151	0.211789	2
ARF3	0.297947	1.84448	0.0651134	0.213725	2
ISG15	0.48202	1.84068	0.0656678	0.215183	2
WIPI1	0.218582	1.8392	0.0658863	0.215538	2
DDT	-0.284571	-1.83285	0.0668251	0.218243	2
PRDX1	-0.228171	-1.82337	0.0682474	0.222516	2
DAP3	-0.186756	-1.82126	0.0685667	0.223185	2
AFF4	0.233416	1.82003	0.0687539	0.223292	2
DSTN	-0.240455	-1.81954	0.0688284	0.223292	2
ZFAS1	-0.223278	-1.81812	0.0690457	0.223626	2
EPC1	0.216751	1.81647	0.0692987	0.224073	2
DNAJC1	-0.26795	-1.81529	0.0694797	0.224175	2
CISD3	-0.333241	-1.81477	0.0695597	0.224175	2
PMP22	-0.25169	-1.81117	0.0701145	0.225591	2
IL7R	-0.575691	-1.80926	0.0704113	0.226173	2
TLN1	-0.259033	-1.80723	0.0707264	0.226812	2
PSMC4	-0.276751	-1.80645	0.0708481	0.22683	2
EWSR1	-0.135115	-1.80283	0.0714148	0.228251	2
GNG5	-0.216887	-1.80188	0.0715639	0.228251	2
AGR3	0.656608	1.80137	0.0716442	0.228251	2
PCF11	-0.208186	-1.80064	0.0717595	0.228251	2
LARP1	-0.192345	-1.79645	0.0724228	0.229987	2
CLTC	-0.18678	-1.79528	0.0726099	0.230063	2
HMGB1	-0.173676	-1.79482	0.0726824	0.230063	2
ILF2	-0.250894	-1.79333	0.0729204	0.230332	2
RHOC	0.320799	1.79207	0.0731212	0.230332	2
SRP9	-0.200245	-1.79207	0.0731214	0.230332	2
TIPARP	-0.365573	-1.79036	0.0733957	0.230824	2
CDC26	-0.305568	-1.78839	0.0737128	0.231449	2
AMD1	-0.23034	-1.78684	0.0739629	0.231861	2
DST	-0.322847	-1.78516	0.0742357	0.232343	2
RPS9	-0.201446	-1.78421	0.07439	0.232449	2
ADAMTS1	0.565378	1.78349	0.0745073	0.232449	2
GABPB1-AS1	0.33754	1.78237	0.074689	0.232644	2
RAMP2	0.465423	1.77646	0.0756565	0.235282	2
LAMTOR3	-0.318505	-1.76964	0.0767877	0.23842	2
DHRS7	-0.332138	-1.76835	0.0770025	0.238708	2
PRDX5	-0.31426	-1.7669	0.0772452	0.239081	2
TMEM205	0.297201	1.7582	0.0787128	0.243237	2
KARS	0.241201	1.74929	0.0802411	0.247569	2
RHOG	-0.308989	-1.74399	0.0811612	0.249629	2
UBQLN1	-0.184041	-1.74397	0.0811647	0.249629	2
FAM120A	0.194452	1.74299	0.0813351	0.249676	2
ANP32B	-0.186371	-1.74228	0.0814599	0.249676	2
POLR2G	-0.232688	-1.74132	0.081627	0.249676	2
UBE2D3	-0.199481	-1.74096	0.0816911	0.249676	2
PSMB5	0.197697	1.73693	0.0824002	0.251449	2
EMC4	0.209238	1.73227	0.0832263	0.25262	2
CHURC1	-0.245554	-1.73209	0.0832569	0.25262	2
GTF2A2	0.236332	1.73192	0.0832879	0.25262	2
MPST	-0.34646	-1.73184	0.0833013	0.25262	2
DDX17	0.215809	1.73011	0.0836103	0.252839	2
SF3B5	-0.245718	-1.72961	0.0837005	0.252839	2
FXR1	0.185917	1.72926	0.083762	0.252839	2
MRPS16	0.199086	1.72748	0.0840817	0.252939	2
CCDC85B	0.38619	1.72636	0.084282	0.252939	2
RPL41	-0.198956	-1.7263	0.0842942	0.252939	2
TANK	-0.236529	-1.72619	0.0843129	0.252939	2
UBE2L6	0.350617	1.72487	0.0845517	0.253266	2
MAP2K1	-0.251202	-1.72344	0.0848095	0.253649	2
IGHA1	1.05676	1.72222	0.0850296	0.253919	2
PNN	-0.251883	-1.72105	0.0852424	0.254166	2
PLEC	0.302966	1.71821	0.0857576	0.255312	2
CLIC1	-0.273584	-1.71481	0.0863803	0.256774	2
AHSA1	0.271918	1.70718	0.0877878	0.260562	2
SNRPB	0.23501	1.70555	0.088091	0.261065	2
GPBP1	0.176824	1.70251	0.0886601	0.262353	2
TERF2IP	-0.169447	-1.69874	0.0893685	0.263665	2
ID3	0.333059	1.698	0.0895069	0.263665	2
HDDC2	-0.230474	-1.698	0.0895085	0.263665	2
TMEM258	-0.213821	-1.6919	0.090665	0.26667	2
RPS24	0.21003	1.69002	0.0910234	0.267321	2
HSBP1	0.174074	1.68904	0.0912119	0.267473	2
GOLIM4	-0.23339	-1.68681	0.0916396	0.267993	2
TBCB	0.250606	1.68669	0.0916639	0.267993	2
RNF139	-0.291873	-1.68266	0.0924411	0.269495	2
TMEM50B	-0.227273	-1.6826	0.0924534	0.269495	2
CTDSP2	0.232839	1.68062	0.0928361	0.270207	2
NUDT14	0.329565	1.67843	0.0932633	0.271047	2
CSNK1D	-0.210751	-1.6712	0.094683	0.274374	2
CCDC115	-0.28862	-1.67116	0.0946892	0.274374	2
NENF	0.23231	1.6692	0.0950787	0.275094	2
SUMO3	-0.263789	-1.65954	0.097007	0.280258	2
FGFR1OP2	0.209911	1.65437	0.0980529	0.282862	2
NUCKS1	0.138517	1.65317	0.0982969	0.283147	2
PSMD14	-0.255355	-1.64988	0.0989669	0.284657	2
GPR183	-0.439077	-1.6428	0.100425	0.288426	2
ERP44	-0.194657	-1.64177	0.100637	0.288506	2
CLK1	0.232379	1.64124	0.100748	0.288506	2
SRSF1	-0.175044	-1.64011	0.100982	0.288752	2
COPZ1	-0.187482	-1.63768	0.101488	0.28914	2
KRAS	-0.245587	-1.63728	0.101571	0.28914	2
RBBP7	-0.188252	-1.63664	0.101706	0.28914	2
DCXR	-0.294997	-1.63662	0.10171	0.28914	2
PSMD6	-0.230577	-1.63587	0.101868	0.289168	2
CLTA	-0.167625	-1.63492	0.102066	0.28931	2
MRPS25	-0.223408	-1.63279	0.102513	0.290155	2
FAM162A	-0.260743	-1.62923	0.103264	0.291858	2
RAP1A	-0.196976	-1.62627	0.103893	0.293129	2
MT-ND6	0.587567	1.6257	0.104013	0.293129	2
AK1	-0.284917	-1.6246	0.104248	0.293367	2
SRM	0.452998	1.62074	0.105073	0.295262	2
TMEM126A	-0.259079	-1.61849	0.105558	0.296199	2
GBP2	0.369024	1.61405	0.106516	0.298459	2
TGFBI	0.345375	1.61189	0.106987	0.299348	2
ISCU	-0.200025	-1.61066	0.107253	0.299665	2
PAG1	-0.436078	-1.60886	0.107647	0.300079	2
FBXL5	-0.182256	-1.60858	0.107709	0.300079	2
RPL7A	0.162146	1.60774	0.107892	0.300162	2
CCT6A	-0.194683	-1.60612	0.108248	0.300723	2
PSMB8	0.263941	1.60217	0.109119	0.302353	2
ZC3HAV1	0.194468	1.60164	0.109235	0.302353	2
MLEC	0.26154	1.60135	0.109299	0.302353	2
CNN3	0.307772	1.59878	0.10987	0.303019	2
DNAJB9	-0.336498	-1.59854	0.109923	0.303019	2
TPRKB	0.242919	1.59817	0.110005	0.303019	2
PAFAH1B2	-0.186341	-1.59726	0.110208	0.303151	2
STX10	-0.348673	-1.59298	0.111166	0.305354	2
OS9	-0.19171	-1.5912	0.111564	0.306017	2
TMOD3	-0.226208	-1.58892	0.11208	0.307	2
VCP	-0.224119	-1.58512	0.112939	0.308624	2
AP1S2	0.27233	1.5849	0.112988	0.308624	2
RANBP2	-0.193192	-1.57722	0.114745	0.312985	2
UQCRQ	-0.164098	-1.57623	0.114973	0.313169	2
ID1	0.344442	1.57216	0.115913	0.315048	2
MRPL43	0.21544	1.57185	0.115985	0.315048	2
CKLF	0.298724	1.56769	0.116954	0.316808	2
TPR	-0.186948	-1.56767	0.116958	0.316808	2
PNKD	-0.239913	-1.56557	0.117449	0.317698	2
VDAC1	-0.167257	-1.56449	0.117703	0.317944	2
RAB2A	-0.157038	-1.5624	0.118195	0.318677	2
SMAP2	-0.264095	-1.56195	0.118301	0.318677	2
FXYD5	0.189748	1.55844	0.119129	0.320317	2
MCTS1	0.197157	1.55742	0.119372	0.320317	2
SNRPN	-0.19917	-1.55692	0.119489	0.320317	2
CHCHD5	-0.252639	-1.55594	0.119722	0.320317	2
UBE2D1	-0.251226	-1.55591	0.119729	0.320317	2
ITM2A	0.428499	1.55419	0.120139	0.320972	2
STMN1	-0.245001	-1.55344	0.120318	0.321013	2
SYPL1	0.219276	1.55248	0.120547	0.321165	2
XBP1	0.253101	1.55143	0.1208	0.321165	2
H1FX	-0.414606	-1.55114	0.120869	0.321165	2
KLRD1	0.397225	1.55031	0.121067	0.321256	2
MTCH1	-0.221071	-1.54547	0.122232	0.323908	2
PRMT2	0.146747	1.5438	0.122637	0.32454	2
SEC22B	-0.277888	-1.54116	0.123277	0.325792	2
EEF1B2	0.176303	1.5399	0.123586	0.325939	2
SHKBP1	-0.264069	-1.53956	0.123667	0.325939	2
MPC2	0.236863	1.53758	0.124151	0.326774	2
POLE4	0.207952	1.53549	0.124664	0.327428	2
CFLAR	-0.228338	-1.53515	0.124746	0.327428	2
BAG3	0.381842	1.53452	0.124902	0.327428	2
ZNF511	0.191201	1.53255	0.125387	0.32763	2
FDFT1	-0.297473	-1.53235	0.125435	0.32763	2
NDUFS3	-0.220322	-1.53216	0.125483	0.32763	2
PSMC2	-0.179367	-1.52867	0.126346	0.329444	2
ARL6IP5	-0.24463	-1.5246	0.127358	0.33164	2
MT-ND1	0.395127	1.52003	0.128504	0.33418	2
LYST	-0.231532	-1.51862	0.128857	0.334652	2
ACTN4	0.245064	1.51483	0.129815	0.336692	2
ARPC5L	-0.215199	-1.51159	0.130637	0.338374	2
NDUFA1	-0.185159	-1.50993	0.131062	0.339026	2
LAPTM4A	0.224944	1.50828	0.131482	0.339662	2
PBDC1	-0.214084	-1.50587	0.132101	0.340346	2
SNHG12	-0.252579	-1.50568	0.13215	0.340346	2
SRSF4	-0.136833	-1.50477	0.132384	0.340346	2
RRAGA	0.271452	1.50453	0.132444	0.340346	2
RAMP3	0.379825	1.50094	0.13337	0.342275	2
RTN3	-0.177391	-1.49494	0.13493	0.345824	2
WIPF1	0.176643	1.49142	0.135851	0.347729	2
FGD2	-0.3885	-1.48932	0.136404	0.348686	2
TIMP1	0.390644	1.48579	0.137333	0.350295	2
GSDMD	0.31993	1.48557	0.137392	0.350295	2
SP100	-0.180481	-1.48374	0.137879	0.351079	2
NDUFA13	-0.21182	-1.48079	0.138663	0.35216	2
LRP1	-0.267829	-1.48078	0.138664	0.35216	2
OSTC	-0.190267	-1.47849	0.139276	0.352693	2
HSP90AA1	0.320499	1.47824	0.139344	0.352693	2
ACOT13	-0.22718	-1.47797	0.139416	0.352693	2
BORCS7	0.207379	1.47167	0.141109	0.356515	2
LSM10	-0.285348	-1.47037	0.141463	0.356947	2
SMIM7	-0.154046	-1.46762	0.142209	0.357104	2
VPS29	-0.130123	-1.46731	0.142292	0.357104	2
ANXA7	-0.150754	-1.46709	0.142352	0.357104	2
PFDN1	-0.179087	-1.46675	0.142444	0.357104	2
SNRPA1	-0.191547	-1.4665	0.142511	0.357104	2
TRAM1	-0.227082	-1.4661	0.142622	0.357104	2
EIF4A2	-0.135471	-1.46399	0.143196	0.357639	2
RPL4	0.141509	1.46397	0.143202	0.357639	2
MYL12B	-0.194221	-1.46247	0.143612	0.358206	2
SNRPF	-0.310806	-1.46172	0.143817	0.358221	2
MRPL51	-0.220179	-1.46111	0.143986	0.358221	2
TGFBR2	0.192183	1.4595	0.144428	0.358864	2
RAB18	-0.185847	-1.45862	0.14467	0.359009	2
PTBP1	0.220473	1.45606	0.145375	0.360301	2
TRAPPC2L	-0.230366	-1.45537	0.145567	0.36032	2
XRCC6	-0.135949	-1.44808	0.147593	0.363983	2
VAMP3	-0.196173	-1.44774	0.14769	0.363983	2
HM13	0.194243	1.44701	0.147895	0.363983	2
TAGLN	-0.35344	-1.44693	0.147918	0.363983	2
PIH1D1	0.217988	1.44671	0.147979	0.363983	2
AXL	-0.377915	-1.44303	0.149012	0.365926	2
VKORC1	0.2395	1.44199	0.149306	0.365926	2
FAM49A	-0.250381	-1.4419	0.149331	0.365926	2
EIF4E2	-0.155957	-1.44015	0.149825	0.366677	2
SERPINB6	0.227501	1.43807	0.150414	0.367659	2
CHCHD1	0.208113	1.43343	0.151734	0.370422	2
NDUFA4	-0.159524	-1.43242	0.152022	0.370661	2
SMIM3	-0.336868	-1.42739	0.153467	0.373373	2
BID	0.239731	1.42722	0.153517	0.373373	2
PLK3	0.238055	1.42642	0.153746	0.373466	2
SEC61B	-0.165163	-1.42469	0.154248	0.373811	2
SUMO1	0.14659	1.42461	0.154271	0.373811	2
VAPA	-0.165727	-1.42287	0.154774	0.374564	2
AKAP13	-0.221489	-1.4222	0.154969	0.374572	2
YIPF3	0.16854	1.42146	0.155182	0.374624	2
MRPL12	0.237732	1.41977	0.155674	0.375347	2
NCL	-0.25578	-1.41579	0.156836	0.37734	2
PPP1R7	0.161974	1.41562	0.156887	0.37734	2
WDR33	-0.14482	-1.41405	0.157348	0.377984	2
PHB	-0.205064	-1.41321	0.157594	0.378109	2
PSMB4	-0.178379	-1.4093	0.158748	0.380411	2
TEX264	0.183003	1.40589	0.159758	0.382362	2
GSTP1	-0.228711	-1.40443	0.160191	0.38293	2
PPA1	-0.208003	-1.40241	0.160792	0.383896	2
PRMT1	0.230501	1.39944	0.161682	0.38555	2
CWC15	-0.154256	-1.39623	0.162647	0.387117	2
SOCS1	-0.365241	-1.39593	0.162736	0.387117	2
UQCR11	-0.148884	-1.39345	0.163483	0.38842	2
TCF25	0.212063	1.39139	0.164108	0.389433	2
DPY30	0.166802	1.38853	0.164976	0.391016	2
DDX18	-0.170096	-1.38716	0.165393	0.391531	2
MACF1	-0.171164	-1.38461	0.166172	0.392897	2
ANAPC16	0.176459	1.38165	0.167079	0.394565	2
PECAM1	0.236278	1.38092	0.167304	0.394619	2
PAPSS1	-0.212722	-1.37767	0.168306	0.396504	2
HCFC1R1	0.218251	1.37651	0.168663	0.396866	2
PLIN3	0.211268	1.37486	0.169174	0.39759	2
TXNL4A	0.170507	1.37329	0.169663	0.39826	2
AKR1A1	-0.146838	-1.37213	0.170022	0.398624	2
RPL31	-0.116843	-1.37091	0.170404	0.399039	2
RPL28	0.167953	1.36873	0.171085	0.400154	2
VMA21	0.236068	1.36752	0.171461	0.40024	2
IL6	0.459529	1.36681	0.171685	0.40024	2
SEC11C	-0.211731	-1.36665	0.171736	0.40024	2
C1orf43	0.148569	1.35997	0.17384	0.40466	2
SEC14L1	0.235315	1.35705	0.174765	0.406329	2
RSRC2	-0.165019	-1.35601	0.175096	0.406613	2
NABP1	-0.230962	-1.35492	0.175444	0.406938	2
COMMD6	0.162122	1.35221	0.176307	0.407996	2
DYNLRB1	0.202184	1.35218	0.176318	0.407996	2
MT1E	-0.497284	-1.35018	0.176959	0.408592	2
HAGH	-0.229481	-1.35007	0.176994	0.408592	2
YWHAG	0.235179	1.34757	0.177798	0.409649	2
ACTR1A	-0.162646	-1.34734	0.177871	0.409649	2
LAMTOR2	0.233854	1.34367	0.179055	0.411889	2
FEZ2	0.145875	1.33978	0.180316	0.414303	2
YWHAH	-0.22529	-1.33858	0.180709	0.414717	2
GLRX3	-0.151262	-1.33791	0.180926	0.414727	2
SMDT1	-0.179026	-1.33043	0.183377	0.419854	2
MAPRE1	-0.199566	-1.32811	0.184141	0.421109	2
C1orf122	0.337649	1.32709	0.184479	0.421389	2
NDUFAB1	0.158629	1.32614	0.184794	0.421616	2
RPL35	-0.145214	-1.32364	0.185624	0.423015	2
GLO1	-0.210525	-1.32217	0.186111	0.423631	2
RBM47	-0.254708	-1.31823	0.187426	0.425698	2
REXO2	0.140231	1.31814	0.187455	0.425698	2
TMEM33	-0.219836	-1.31743	0.187694	0.425745	2
PDIA6	0.168194	1.31572	0.188267	0.426386	2
TNFRSF14	0.243512	1.31507	0.188486	0.426386	2
MZT2A	0.263063	1.31464	0.188631	0.426386	2
SERPINB9	0.319315	1.31194	0.189541	0.427394	2
QSOX1	-0.190654	-1.31175	0.189603	0.427394	2
BNIP2	-0.14192	-1.31137	0.189734	0.427394	2
RPS23	0.157341	1.31008	0.190169	0.427881	2
COX17	-0.174384	-1.30766	0.190988	0.429109	2
ERP29	-0.140657	-1.30717	0.191155	0.429109	2
TMEM59	0.138061	1.30396	0.192248	0.431067	2
CLDN4	-0.444187	-1.3028	0.192643	0.431458	2
TUBA4A	-0.231578	-1.30082	0.193321	0.432481	2
ZYX	0.218442	1.29858	0.194087	0.433234	2
NEDD8	-0.139904	-1.29854	0.194101	0.433234	2
PSMB6	-0.205562	-1.29511	0.195282	0.435371	2
TSPAN1	0.554678	1.29225	0.196269	0.437074	2
ISG20	-0.278259	-1.28588	0.198484	0.441502	2
PRELID1	-0.220846	-1.28465	0.198916	0.44196	2
PAIP2	-0.146912	-1.28336	0.199367	0.442458	2
RPL7	-0.14941	-1.28181	0.199908	0.443106	2
CMC2	0.171426	1.28116	0.200138	0.443106	2
CAPN2	-0.153632	-1.28059	0.200339	0.443106	2
GOLGA7	0.164363	1.27841	0.201105	0.444297	2
EIF4B	-0.131401	-1.27733	0.201486	0.444635	2
COL6A2	0.396373	1.27026	0.203992	0.449656	2
SCP2	-0.155955	-1.26745	0.204996	0.451354	2
MRPL55	-0.193447	-1.26681	0.205224	0.451354	2
CNDP2	-0.127223	-1.26598	0.205521	0.451498	2
LRRC59	-0.24284	-1.26228	0.206849	0.453905	2
PSMG2	-0.137535	-1.25977	0.207753	0.455379	2
LRP10	0.176502	1.25746	0.208589	0.456697	2
HMGN1	0.129024	1.25253	0.210378	0.459759	2
CXCL1	0.467807	1.25231	0.210458	0.459759	2
IFITM3	0.183788	1.25061	0.211078	0.460379	2
CYB5R3	0.163555	1.25024	0.211213	0.460379	2
RUNX1	0.264554	1.24724	0.212308	0.461371	2
SRSF6	0.20407	1.24716	0.212339	0.461371	2
CAPZA2	-0.172904	-1.2466	0.212544	0.461371	2
HSPA9	-0.152901	-1.24641	0.212613	0.461371	2
KRT7	-0.347854	-1.24517	0.213069	0.461846	2
UBE2F	0.13559	1.24343	0.213708	0.462427	2
UBE2E1	-0.179958	-1.24316	0.21381	0.462427	2
STRAP	-0.194544	-1.24072	0.214709	0.463857	2
RAC1	-0.127345	-1.23813	0.215669	0.465416	2
FKBP8	0.195196	1.23239	0.217803	0.46899	2
XRCC5	0.127715	1.23238	0.217805	0.46899	2
EIF1AX	-0.178191	-1.23064	0.218458	0.469878	2
IER5	0.313056	1.22969	0.218812	0.470121	2
STX8	0.144953	1.2273	0.21971	0.470588	2
DNAJC8	-0.122562	-1.22726	0.219724	0.470588	2
CLNS1A	0.107187	1.22719	0.219752	0.470588	2
LIMS1	0.175694	1.22355	0.221124	0.47245	2
H2AFV	-0.141913	-1.22299	0.221335	0.47245	2
KDSR	0.161141	1.22295	0.221347	0.47245	2
YME1L1	-0.155191	-1.22163	0.221849	0.473002	2
RPL32	-0.122402	-1.22078	0.22217	0.473171	2
MTHFD2	-0.213353	-1.21976	0.222558	0.473481	2
RPS27L	0.161713	1.21817	0.223159	0.474243	2
SH3GLB1	-0.113952	-1.21732	0.223483	0.474416	2
YTHDC1	-0.123575	-1.21494	0.22439	0.475079	2
NEDD9	-0.228409	-1.21474	0.224465	0.475079	2
UBE2I	-0.148372	-1.21445	0.224575	0.475079	2
RNF145	0.200827	1.21395	0.224769	0.475079	2
DGCR6L	0.265906	1.21278	0.225215	0.475507	2
CARD16	-0.309839	-1.21125	0.225801	0.47623	2
FDX1	-0.179451	-1.21014	0.226226	0.476392	2
ARRDC3	0.271036	1.20902	0.226654	0.476392	2
FKBP4	0.242842	1.20844	0.226879	0.476392	2
SPINT2	-0.191872	-1.20795	0.227065	0.476392	2
PRPF38B	-0.15587	-1.20738	0.227285	0.476392	2
SMCO4	-0.207345	-1.207	0.227432	0.476392	2
ANKRD37	0.347419	1.20627	0.227715	0.476392	2
TFG	0.16486	1.20501	0.228198	0.476392	2
ATP6V1H	-0.127606	-1.20492	0.228232	0.476392	2
ERGIC3	0.143642	1.2041	0.228549	0.476392	2
MRPL42	0.150038	1.2038	0.228667	0.476392	2
DDX46	-0.175873	-1.20299	0.228979	0.476392	2
ACTA2	0.319026	1.20281	0.229048	0.476392	2
ROCK1	-0.106828	-1.20064	0.229891	0.477057	2
RBM39	-0.114871	-1.19958	0.230302	0.477057	2
CLDN5	0.360788	1.19892	0.230557	0.477057	2
UCP2	0.232796	1.19856	0.230699	0.477057	2
MT-ND4L	0.404106	1.1984	0.230762	0.477057	2
RPS16	0.135892	1.19821	0.230834	0.477057	2
PPP3CA	0.22298	1.19397	0.232489	0.47958	2
PNP	0.292193	1.19383	0.232546	0.47958	2
BABAM1	-0.132978	-1.19248	0.233073	0.480024	2
MSN	0.201526	1.19151	0.233454	0.480024	2
COX6C	-0.113525	-1.19139	0.233499	0.480024	2
PNRC2	-0.148068	-1.18996	0.234063	0.480677	2
RPL24	0.125276	1.18893	0.234469	0.480934	2
NOP56	0.216058	1.18839	0.23468	0.480934	2
UQCRH	-0.117141	-1.18755	0.23501	0.481105	2
RCN1	0.235052	1.18454	0.2362	0.482674	2
SARAF	-0.152642	-1.18436	0.236271	0.482674	2
BAD	0.183676	1.18215	0.237146	0.483613	2
RAB1A	-0.130574	-1.18195	0.237225	0.483613	2
SLC16A10	-0.35663	-1.18084	0.237665	0.484003	2
ARPP19	-0.15981	-1.17739	0.239039	0.486294	2
GNA13	0.228685	1.17343	0.240625	0.487577	2
MRPL20	-0.115189	-1.17206	0.241173	0.487577	2
ARID5A	0.220164	1.1718	0.241277	0.487577	2
TRMT112	-0.171132	-1.17174	0.2413	0.487577	2
FBL	0.203502	1.17158	0.241367	0.487577	2
NAGK	0.175309	1.17157	0.241369	0.487577	2
EIF2S2	-0.150869	-1.17145	0.241417	0.487577	2
MSRB2	0.159817	1.16962	0.242153	0.488558	2
PDIA4	0.226604	1.16886	0.24246	0.488573	2
RPL15	-0.128218	-1.16836	0.242661	0.488573	2
CHMP5	0.137767	1.1668	0.243292	0.489341	2
COMMD4	-0.186516	-1.16495	0.24404	0.489975	2
FAU	-0.107381	-1.16478	0.244109	0.489975	2
TNFRSF12A	-0.350454	-1.1615	0.245438	0.491889	2
SLTM	-0.125962	-1.16119	0.245567	0.491889	2
MRPL3	-0.16753	-1.15811	0.246818	0.49389	2
SRP19	0.124599	1.15727	0.24716	0.494016	2
HNRNPF	0.16024	1.15672	0.247387	0.494016	2
ATRX	0.136809	1.15404	0.248483	0.495698	2
PFKFB3	-0.180911	-1.15177	0.249417	0.496228	2
DEGS1	0.202086	1.15134	0.249591	0.496228	2
CHMP1B	-0.21399	-1.15009	0.250109	0.496228	2
KLHDC2	-0.160361	-1.15001	0.250141	0.496228	2
RPA3	0.182523	1.14914	0.2505	0.496228	2
UBA52	-0.121683	-1.14871	0.250675	0.496228	2
RBM7	-0.224452	-1.14857	0.250733	0.496228	2
DNAJC15	-0.135404	-1.14845	0.250782	0.496228	2
ACAA1	-0.172843	-1.14308	0.253005	0.500074	2
VBP1	-0.169008	-1.14252	0.253238	0.500074	2
MGST1	-0.236513	-1.14081	0.25395	0.500398	2
NRBP1	-0.147147	-1.14017	0.254217	0.500398	2
CALM3	0.157504	1.13991	0.254325	0.500398	2
MRPL22	0.154669	1.13862	0.254862	0.500398	2
EFEMP1	0.336421	1.13814	0.255064	0.500398	2
ATRAID	-0.153504	-1.13772	0.255239	0.500398	2
AIMP1	-0.0957701	-1.13722	0.255448	0.500398	2
BZW1	-0.158045	-1.1369	0.255579	0.500398	2
KLF3	-0.159483	-1.13659	0.255708	0.500398	2
CAMTA1	0.112925	1.13492	0.256409	0.50054	2
WIPI2	0.12104	1.13489	0.256422	0.50054	2
PTTG1IP	0.145234	1.13458	0.256549	0.50054	2
MTRNR2L12	0.261619	1.13384	0.256863	0.500652	2
PGLS	0.146043	1.13292	0.257249	0.500904	2
DDX24	-0.146247	-1.13223	0.257537	0.500966	2
ARIH1	0.173052	1.12926	0.258788	0.502899	2
PSMA4	-0.117719	-1.12842	0.259144	0.50309	2
LSM8	0.0917991	1.12705	0.25972	0.503695	2
HEBP1	-0.166637	-1.12575	0.260272	0.503695	2
FBXW5	0.213482	1.12533	0.260448	0.503695	2
AKAP9	-0.184612	-1.12482	0.260666	0.503695	2
CHCHD3	-0.160973	-1.12463	0.260746	0.503695	2
UBL5	-0.126127	-1.12131	0.262155	0.505342	2
SPN	-0.365971	-1.12128	0.26217	0.505342	2
RAP1B	-0.163854	-1.1208	0.262374	0.505342	2
DDOST	-0.150344	-1.119	0.26314	0.506318	2
TCEAL8	-0.194503	-1.11777	0.263667	0.506832	2
HINT1	0.115951	1.11706	0.263967	0.506911	2
EIF3E	0.15114	1.11446	0.265081	0.508277	2
ERGIC1	-0.125424	-1.11419	0.265199	0.508277	2
ACSL3	-0.19056	-1.11012	0.266948	0.510634	2
KDELR2	-0.161296	-1.11011	0.266952	0.510634	2
DDX3X	-0.183855	-1.10914	0.267372	0.510936	2
MORN2	0.221113	1.10785	0.267927	0.511259	2
G3BP2	-0.160103	-1.10753	0.268064	0.511259	2
CXCL17	0.348756	1.1021	0.270419	0.515246	2
SSBP1	-0.117969	-1.10085	0.270963	0.515781	2
COPRS	0.22704	1.09912	0.271715	0.516565	2
FGD5-AS1	0.165116	1.09869	0.271904	0.516565	2
NEK6	-0.185	-1.09597	0.27309	0.517874	2
RHOQ	-0.217724	-1.09513	0.273459	0.517874	2
RPSA	-0.117405	-1.09498	0.273525	0.517874	2
ARHGAP18	-0.227903	-1.09469	0.273654	0.517874	2
BEX4	-0.184115	-1.09405	0.273935	0.517904	2
IDH2	0.146907	1.09211	0.274787	0.519012	2
TMEM147	-0.142581	-1.0909	0.275319	0.519289	2
RGS2	-0.226905	-1.09056	0.275465	0.519289	2
MED10	-0.135804	-1.08906	0.276127	0.51962	2
CALU	0.152442	1.08896	0.276173	0.51962	2
RPL5	0.111636	1.08529	0.277794	0.522168	2
HEXIM1	0.197968	1.08209	0.279211	0.523875	2
LPP	0.174125	1.08203	0.279239	0.523875	2
RPL10A	0.11418	1.08128	0.279572	0.523997	2
RPS11	0.112765	1.07963	0.280305	0.524867	2
CEBPG	-0.173113	-1.07775	0.281143	0.525932	2
IER3IP1	-0.147131	-1.0747	0.28251	0.527571	2
CCNDBP1	-0.140753	-1.07459	0.28256	0.527571	2
TACSTD2	-0.419335	-1.0707	0.284305	0.530322	2
SEC11A	0.0946481	1.06733	0.285822	0.532246	2
MPHOSPH6	-0.199269	-1.0672	0.285881	0.532246	2
TNIP1	0.181912	1.06523	0.286771	0.533393	2
HINT2	-0.208622	-1.06331	0.28764	0.534058	2
UBE2V2	0.111311	1.06324	0.287675	0.534058	2
NNMT	0.184117	1.06032	0.289	0.536009	2
TXNDC17	-0.175105	-1.05569	0.29111	0.539027	2
IRF7	0.260849	1.05554	0.29118	0.539027	2
GGCT	0.127581	1.05256	0.292542	0.540568	2
TUBB6	-0.181553	-1.05251	0.292565	0.540568	2
MRPL57	-0.141993	-1.05017	0.293638	0.542037	2
NDUFC1	0.152744	1.04894	0.294207	0.542574	2
PRELID3B	-0.195029	-1.04748	0.294879	0.543301	2
C9orf24	0.280481	1.04445	0.296279	0.545076	2
TAF1D	-0.13628	-1.04418	0.296401	0.545076	2
PPP1R10	0.133912	1.0429	0.296995	0.545254	2
ETFB	-0.140442	-1.04277	0.297056	0.545254	2
CCDC124	-0.190617	-1.04212	0.297357	0.545294	2
MRPL24	0.15045	1.04125	0.297761	0.545524	2
RPS19	-0.207056	-1.04018	0.298254	0.545915	2
HSD17B10	-0.171866	-1.03715	0.299664	0.547229	2
COMMD3	-0.147916	-1.03699	0.299741	0.547229	2
SMCHD1	-0.112407	-1.03683	0.299813	0.547229	2
UBE2A	-0.116974	-1.03466	0.300829	0.548571	2
RBM3	-0.125624	-1.03396	0.301153	0.548648	2
SLC25A11	0.169299	1.03235	0.301907	0.549321	2
SLC25A33	-0.187936	-1.03197	0.302084	0.549321	2
SLC38A2	0.177678	1.02889	0.303529	0.551435	2
NME3	0.221161	1.02737	0.304244	0.551521	2
ATP6V0D1	-0.124578	-1.02724	0.304306	0.551521	2
DCTN2	-0.0995244	-1.02544	0.305155	0.551521	2
LAMTOR4	-0.106445	-1.02539	0.305181	0.551521	2
RDX	-0.124001	-1.02529	0.305228	0.551521	2
HADHB	-0.101549	-1.02513	0.305303	0.551521	2
MRPL11	-0.164545	-1.02436	0.305665	0.551521	2
LUC7L3	-0.165972	-1.024	0.305836	0.551521	2
BUB3	-0.121136	-1.02213	0.306719	0.551982	2
RAB6A	-0.101146	-1.02178	0.306883	0.551982	2
PPP2CA	0.148329	1.02167	0.306939	0.551982	2
ACER3	-0.190072	-1.02019	0.30764	0.552733	2
NDUFS5	-0.119327	-1.01837	0.308504	0.553562	2
IFI27	0.185718	1.01796	0.308699	0.553562	2
MRPS7	-0.185277	-1.01742	0.308951	0.553562	2
HLA-DRA	-0.338671	-1.01426	0.310459	0.555752	2
VDAC2	-0.137533	-1.01313	0.310999	0.556209	2
HMGA1	-0.202629	-1.0112	0.311921	0.557191	2
IDH3G	-0.167966	-1.01043	0.312287	0.557191	2
POLR2L	-0.135005	-1.01018	0.312409	0.557191	2
RNASEH2B	-0.136077	-1.00934	0.312813	0.557191	2
RNF115	0.152091	1.009	0.312974	0.557191	2
C1QBP	0.135275	1.00528	0.314762	0.559678	2
ARF1	-0.113551	-1.00437	0.315198	0.559678	2
UXT	-0.107164	-1.00431	0.315231	0.559678	2
PTPN2	-0.138657	-1.00273	0.315989	0.559706	2
RPL26L1	0.185195	1.00214	0.316275	0.559706	2
WDR13	-0.154499	-1.00201	0.316338	0.559706	2
PIGR	0.343531	1.0019	0.316393	0.559706	2
PSMB7	-0.0987395	-1.00043	0.317103	0.560454	2
RPS15	-0.0873634	-0.999111	0.317741	0.561075	2
SUPT4H1	-0.165672	-0.996607	0.318956	0.56271	2
HLA-C	-0.230206	-0.993577	0.320429	0.564799	2
PSMD8	-0.11848	-0.991058	0.321657	0.566209	2
SLC34A2	-0.229302	-0.990749	0.321808	0.566209	2
SNX6	-0.0971154	-0.987924	0.32319	0.568127	2
PSMC6	-0.10345	-0.987186	0.323552	0.568252	2
ARPC4	0.120293	0.984858	0.324694	0.569746	2
MRPL34	0.131603	0.982374	0.325916	0.571108	2
UBE2B	-0.119718	-0.981651	0.326272	0.571108	2
CSRP1	-0.188801	-0.981334	0.326428	0.571108	2
ANXA4	-0.1195	-0.980876	0.326654	0.571108	2
CIRBP	0.12478	0.980312	0.326932	0.571108	2
EIF4H	0.111743	0.976223	0.328954	0.573763	2
HMOX2	-0.132344	-0.976049	0.32904	0.573763	2
TXNL1	-0.12054	-0.974783	0.329668	0.574346	2
CAPZA1	-0.153192	-0.972816	0.330645	0.575534	2
CCT5	0.130971	0.970804	0.331646	0.576762	2
RPS26	-0.235042	-0.967966	0.333062	0.578661	2
HNRNPA1	-0.0929238	-0.967428	0.33333	0.578661	2
NDUFB7	-0.116835	-0.963867	0.335113	0.581239	2
HNRNPAB	0.194396	0.963115	0.33549	0.581376	2
NR4A2	-0.214915	-0.962363	0.335867	0.581515	2
RBPJ	-0.125184	-0.9568	0.338668	0.585845	2
SNW1	-0.1074	-0.954757	0.3397	0.587111	2
NDUFB4	0.142661	0.953882	0.340143	0.587356	2
GNAS	0.13144	0.951434	0.341384	0.588978	2
CHMP3	-0.0989275	-0.950394	0.341912	0.589368	2
SMIM12	0.145956	0.948993	0.342624	0.58995	2
PNRC1	0.201333	0.948342	0.342956	0.58995	2
TMEM160	-0.173874	-0.947768	0.343248	0.58995	2
SDF2	0.137176	0.947355	0.343458	0.58995	2
ARF4	-0.164742	-0.946584	0.343851	0.590106	2
MAP3K13	-0.144673	-0.945791	0.344255	0.590281	2
CAMLG	0.121819	0.941482	0.346458	0.593537	2
TGIF1	-0.129882	-0.939032	0.347714	0.594522	2
SUCLG1	-0.0889016	-0.93869	0.34789	0.594522	2
TMED9	0.154135	0.938581	0.347946	0.594522	2
SSR4	0.120126	0.936751	0.348887	0.595362	2
PRPF4B	-0.105053	-0.936439	0.349047	0.595362	2
CHMP2B	-0.151235	-0.934869	0.349856	0.59622	2
C12orf57	0.146234	0.933223	0.350705	0.597129	2
NOL7	0.118455	0.932651	0.351	0.597129	2
RPL22L1	-0.15378	-0.929731	0.35251	0.598736	2
PRDM1	0.264991	0.929638	0.352558	0.598736	2
HNRNPK	-0.0904682	-0.92795	0.353433	0.599701	2
GIMAP4	0.258665	0.925242	0.35484	0.60093	2
RANBP1	-0.120978	-0.925046	0.354942	0.60093	2
TMED4	-0.126785	-0.924778	0.355081	0.60093	2
PDCD10	-0.107758	-0.923526	0.355733	0.601513	2
VPS26A	-0.117472	-0.919895	0.357627	0.604192	2
KRT18	-0.265724	-0.915907	0.359716	0.607195	2
WDR1	0.130126	0.913729	0.360859	0.608426	2
SMIM19	0.129628	0.913332	0.361068	0.608426	2
TAX1BP3	0.139194	0.912607	0.361449	0.608543	2
ARPC1A	0.08707	0.910781	0.362411	0.609637	2
RNASEH2C	0.122262	0.910068	0.362786	0.609744	2
BANF1	0.160506	0.908195	0.363775	0.610737	2
DNAJC19	0.117493	0.907764	0.364003	0.610737	2
TIMM8B	0.145678	0.906555	0.364642	0.610897	2
FNIP2	0.167219	0.906341	0.364755	0.610897	2
CLIP1	-0.118657	-0.905392	0.365258	0.610897	2
SLC6A6	-0.202446	-0.904512	0.365724	0.610897	2
CSDE1	-0.0992835	-0.904409	0.365779	0.610897	2
ARMCX3	-0.137718	-0.903774	0.366115	0.610897	2
RAB34	-0.153753	-0.903448	0.366288	0.610897	2
SIGIRR	0.198228	0.901969	0.367073	0.611418	2
ELF1	-0.118921	-0.901681	0.367226	0.611418	2
JMJD6	-0.148501	-0.898299	0.369026	0.613891	2
SKP1	-0.109951	-0.8942	0.371215	0.616719	2
IFI27L2	-0.141503	-0.893933	0.371358	0.616719	2
SON	0.140408	0.893223	0.371738	0.616826	2
NR3C1	-0.119991	-0.892586	0.372079	0.616867	2
JOSD2	0.186763	0.890913	0.372976	0.617049	2
OTUB1	-0.14668	-0.890315	0.373297	0.617049	2
COMMD1	-0.0940202	-0.890181	0.373369	0.617049	2
RPS17	0.105084	0.889555	0.373705	0.617049	2
POLR2K	-0.158348	-0.889438	0.373768	0.617049	2
SUCLG2	-0.112297	-0.884754	0.376289	0.620687	2
MRPL54	0.173103	0.884099	0.376643	0.620738	2
NUCB2	0.1395	0.883519	0.376956	0.620738	2
EGFL7	0.226505	0.881972	0.377792	0.62159	2
RAB11B	0.182296	0.880613	0.378527	0.622276	2
ZNF106	-0.0885362	-0.879685	0.37903	0.622578	2
AZIN1	0.124401	0.878377	0.379739	0.622749	2
TSPYL1	0.179637	0.878147	0.379864	0.622749	2
GTF3A	0.100163	0.87773	0.38009	0.622749	2
SOD1	0.093268	0.876571	0.380719	0.622959	2
XRN2	-0.105902	-0.876319	0.380856	0.622959	2
KRT19	0.290608	0.875219	0.381455	0.623372	2
PPP1R11	0.173148	0.874681	0.381748	0.623372	2
ISCA1	-0.119979	-0.871972	0.383224	0.624559	2
HNRNPM	0.0824024	0.871673	0.383387	0.624559	2
RPL37A	0.121407	0.871587	0.383434	0.624559	2
A2M	0.163727	0.869755	0.384434	0.625667	2
MALAT1	-0.126938	-0.869136	0.384772	0.625696	2
RPL39	0.24907	0.868282	0.38524	0.625935	2
QARS	-0.156816	-0.867017	0.385933	0.626429	2
SNU13	-0.104117	-0.865587	0.386717	0.626429	2
PGRMC1	0.153525	0.865489	0.386771	0.626429	2
UBE2E3	0.129678	0.865386	0.386827	0.626429	2
SNRPG	-0.118573	-0.863693	0.387757	0.62675	2
CIB1	0.127351	0.863292	0.387977	0.62675	2
MAGED2	0.159309	0.862672	0.388318	0.62675	2
EEF2	0.105251	0.862549	0.388385	0.62675	2
RAB8A	-0.115974	-0.862105	0.38863	0.62675	2
2025-03-06	-0.110691	-0.859094	0.390288	0.628905	2
ADAR	0.0975206	0.856575	0.39168	0.630628	2
TOB1	-0.218581	-0.855083	0.392505	0.631435	2
AK6	0.138352	0.854354	0.392909	0.631565	2
PPM1G	0.115033	0.853321	0.393481	0.631965	2
RPL9	0.078349	0.85159	0.394442	0.632987	2
RAB4A	-0.104736	-0.849958	0.395349	0.633921	2
COPS5	0.107295	0.844979	0.398122	0.637845	2
PPP2R1A	0.0956771	0.843401	0.399004	0.638623	2
PDCD2	0.128138	0.842491	0.399513	0.638623	2
EIF3J	-0.102954	-0.842356	0.399589	0.638623	2
TCP1	-0.124664	-0.840953	0.400374	0.639215	2
TMEM30A	-0.098852	-0.840525	0.400614	0.639215	2
GAPDH	0.11227	0.836286	0.402994	0.642019	2
IRF2BP2	0.14012	0.836224	0.403029	0.642019	2
HNRNPH1	0.083023	0.835134	0.403642	0.642472	2
CDV3	-0.117164	-0.834373	0.404071	0.64263	2
ITM2B	0.115068	0.832399	0.405184	0.643353	2
LSM3	-0.101533	-0.832399	0.405184	0.643353	2
SUGT1	0.0871978	0.829995	0.406542	0.644985	2
UQCRB	0.151195	0.828438	0.407422	0.645715	2
PDAP1	0.0934748	0.828013	0.407663	0.645715	2
NDUFB8	-0.0938547	-0.825848	0.40889	0.646186	2
GTF3C6	-0.108778	-0.825379	0.409157	0.646186	2
RPS12	0.121273	0.824756	0.40951	0.646186	2
MKNK2	0.170826	0.823917	0.409987	0.646186	2
PPIA	-0.0909853	-0.823823	0.41004	0.646186	2
RAN	-0.105048	-0.823777	0.410066	0.646186	2
TUBB4B	0.165503	0.823097	0.410453	0.646186	2
HNRNPD	0.0792028	0.822459	0.410816	0.646186	2
PSMC5	-0.130653	-0.821342	0.411451	0.646186	2
PPP1R18	-0.122963	-0.821118	0.411579	0.646186	2
MKKS	0.131584	0.821081	0.4116	0.646186	2
TMEM14C	0.104587	0.817356	0.413725	0.648606	2
RHOH	-0.184224	-0.817214	0.413806	0.648606	2
FBLN1	0.31087	0.815859	0.414581	0.649299	2
SH3BGRL	-0.0946037	-0.811258	0.417218	0.652424	2
PSMF1	-0.0822536	-0.81117	0.417268	0.652424	2
PCM1	-0.0774087	-0.81063	0.417578	0.652424	2
JAK1	-0.110068	-0.808771	0.418647	0.653571	2
SDHD	-0.106837	-0.806093	0.420189	0.655455	2
ANAPC11	-0.109197	-0.804713	0.420985	0.656173	2
HIF1A	0.155272	0.803544	0.42166	0.656195	2
CDC42EP3	0.159516	0.803525	0.421672	0.656195	2
JMJD1C	0.141351	0.799804	0.423825	0.65902	2
TP53I3	-0.169357	-0.798061	0.424835	0.65995	2
STARD3NL	-0.108364	-0.797608	0.425098	0.65995	2
UQCC2	0.0947688	0.795572	0.426281	0.66126	2
STK4	-0.150411	-0.794635	0.426826	0.66158	2
SF3B1	-0.104139	-0.793328	0.427587	0.662234	2
RBBP6	0.0923695	0.792389	0.428134	0.662556	2
P4HB	0.0947958	0.789731	0.429685	0.663364	2
NONO	-0.0928667	-0.789634	0.429742	0.663364	2
RPS3	-0.0925412	-0.789371	0.429895	0.663364	2
RBM8A	-0.093625	-0.788861	0.430193	0.663364	2
SLBP	0.103581	0.788239	0.430557	0.663364	2
SCAF11	-0.0719417	-0.788005	0.430694	0.663364	2
NUDT21	0.0961697	0.785704	0.432041	0.664914	2
NDUFB11	-0.102901	-0.783989	0.433047	0.66592	2
UFC1	0.105549	0.783426	0.433377	0.66592	2
LMAN1	-0.0950623	-0.782676	0.433817	0.666074	2
NUFIP2	0.104597	0.781866	0.434294	0.666281	2
RPS5	-0.0831681	-0.780784	0.434929	0.666732	2
USF2	0.140978	0.778114	0.436502	0.668618	2
SRP14	-0.0892987	-0.774275	0.438768	0.670774	2
GABARAPL2	0.0919212	0.774066	0.438892	0.670774	2
NDUFS4	0.108793	0.773516	0.439217	0.670774	2
EIF5B	-0.0920803	-0.773404	0.439283	0.670774	2
RPL13	-0.0861859	-0.770191	0.441187	0.672758	2
COX5B	0.086741	0.769112	0.441827	0.672758	2
COPA	0.0869998	0.769	0.441893	0.672758	2
TMEM259	0.202347	0.768887	0.441961	0.672758	2
SNX5	0.0835188	0.765616	0.443905	0.674712	2
MAGOH	-0.116756	-0.765565	0.443935	0.674712	2
SERPINB1	-0.159296	-0.764472	0.444586	0.674764	2
PIM3	-0.140951	-0.764347	0.44466	0.674764	2
LDHA	-0.0945806	-0.763263	0.445307	0.675117	2
RAB31	-0.148359	-0.762797	0.445584	0.675117	2
DECR1	0.0964415	0.761828	0.446162	0.675469	2
DDIT4	-0.157655	-0.760395	0.447019	0.676241	2
NSA2	0.0988842	0.758375	0.448227	0.67717	2
RPL22	0.0612609	0.758209	0.448326	0.67717	2
SNRPE	0.103639	0.756709	0.449224	0.67777	2
PTGES3	0.0929964	0.756386	0.449418	0.67777	2
VTI1B	0.0860382	0.75546	0.449973	0.677953	2
FIBP	0.112552	0.755026	0.450233	0.677953	2
RTCB	-0.0942919	-0.753655	0.451056	0.678669	2
DPYSL2	0.12787	0.749268	0.453696	0.682116	2
EIF4G2	-0.0835414	-0.748628	0.454081	0.68217	2
WDR83OS	-0.0887551	-0.747593	0.454706	0.682583	2
EMP1	0.262511	0.743997	0.456878	0.685317	2
WBP2	-0.114944	-0.741577	0.458344	0.686782	2
SRI	-0.112789	-0.741223	0.458558	0.686782	2
RGS1	0.210301	0.739085	0.459855	0.688099	2
C11orf96	0.284718	0.738614	0.460142	0.688099	2
MFSD10	-0.140066	-0.736423	0.461473	0.688289	2
SSU72	-0.0835886	-0.73546	0.462059	0.688289	2
RPL19	-0.0752938	-0.734647	0.462555	0.688289	2
CNOT7	0.0926678	0.734298	0.462767	0.688289	2
SCARB2	-0.0841844	-0.734173	0.462843	0.688289	2
PJA2	0.0962447	0.73354	0.463229	0.688289	2
MDM4	-0.0673399	-0.73314	0.463473	0.688289	2
BAG1	0.115876	0.732433	0.463904	0.688289	2
NUDCD2	-0.112181	-0.732175	0.464062	0.688289	2
GADD45B	-0.117758	-0.730946	0.464812	0.688289	2
SS18L2	-0.118589	-0.7306	0.465024	0.688289	2
SPNS1	-0.15051	-0.73042	0.465134	0.688289	2
PER1	-0.135623	-0.730322	0.465193	0.688289	2
NAA50	-0.102238	-0.730306	0.465203	0.688289	2
PCBD1	-0.108574	-0.729371	0.465775	0.688614	2
NME1	0.125399	0.728572	0.466263	0.688814	2
MT2A	-0.27619	-0.727706	0.466793	0.689036	2
LSM1	0.101408	0.727174	0.467119	0.689036	2
RPL11	-0.0673622	-0.726069	0.467796	0.689514	2
CALCOCO2	-0.115624	-0.723542	0.469347	0.691278	2
HNRNPH3	-0.0979417	-0.720129	0.471445	0.692642	2
NDUFB6	-0.084829	-0.720124	0.471449	0.692642	2
TMED2	-0.0810889	-0.719883	0.471597	0.692642	2
CUTA	-0.0921024	-0.719729	0.471692	0.692642	2
RNASE1	0.165134	0.719042	0.472115	0.692743	2
SDHB	-0.0722521	-0.714542	0.474892	0.695696	2
ARF6	-0.143894	-0.7145	0.474918	0.695696	2
SMIM14	0.0882174	0.71405	0.475196	0.695696	2
SSB	-0.0904963	-0.712969	0.475865	0.695698	2
COA6	0.135429	0.71276	0.475994	0.695698	2
COPS6	0.0978953	0.712321	0.476266	0.695698	2
RPL37	0.0957399	0.711657	0.476677	0.695777	2
EGLN2	-0.128283	-0.709475	0.47803	0.69695	2
RPS15A	0.0729542	0.708829	0.478431	0.69695	2
UBE2L3	0.0606399	0.708635	0.478551	0.69695	2
AKAP12	0.212917	0.705675	0.48039	0.699108	2
GADD45GIP1	-0.106793	-0.70197	0.482698	0.700827	2
NDUFB2	-0.0767669	-0.701375	0.483069	0.700827	2
SERINC1	0.101975	0.701257	0.483143	0.700827	2
ETS2	0.128099	0.701161	0.483202	0.700827	2
MTPN	-0.107162	-0.700281	0.483752	0.700827	2
HP1BP3	0.0758906	0.699969	0.483947	0.700827	2
RPL27	-0.0813498	-0.699749	0.484084	0.700827	2
TOP1	-0.112104	-0.698984	0.484562	0.700999	2
NDUFV3	0.088762	0.696846	0.485899	0.702414	2
UBXN11	-0.135616	-0.695028	0.487038	0.7032	2
CARHSP1	0.106907	0.694828	0.487163	0.7032	2
APH1A	0.132833	0.693582	0.487944	0.703807	2
SZRD1	0.0783568	0.692985	0.488319	0.703828	2
SPPL2A	-0.0922044	-0.69093	0.489609	0.704244	2
SUB1	-0.0758417	-0.690708	0.489749	0.704244	2
CIR1	-0.0736267	-0.690464	0.489903	0.704244	2
S100A6	-0.0989384	-0.690229	0.49005	0.704244	2
RIPK2	-0.125768	-0.688675	0.491028	0.70513	2
RPS8	0.070836	0.687472	0.491785	0.705699	2
CHMP4A	-0.0780606	-0.68675	0.492241	0.705812	2
EIF6	-0.127632	-0.686201	0.492586	0.705812	2
UAP1	-0.112175	-0.685483	0.493039	0.705924	2
IMP3	-0.113571	-0.68493	0.493388	0.705924	2
NDUFA3	0.0971677	0.6823	0.495049	0.707538	2
ADIRF	0.144654	0.681998	0.49524	0.707538	2
FKBP1A	0.0832309	0.680926	0.495919	0.707989	2
RBCK1	0.130456	0.678693	0.497333	0.709074	2
NEU1	-0.129489	-0.678579	0.497405	0.709074	2
CLN8	0.0934091	0.676774	0.498549	0.710098	2
TUBB	0.106852	0.6763	0.49885	0.710098	2
GCC2	0.0880767	0.672496	0.501268	0.71302	2
KRT8	0.191443	0.667644	0.504361	0.716897	2
CNOT2	0.101727	0.656546	0.511473	0.726477	2
FKBP3	0.0676875	0.655569	0.512101	0.72663	2
CCT4	0.0773163	0.655223	0.512324	0.72663	2
CLIC4	0.113921	0.651775	0.514546	0.729252	2
SURF1	-0.117595	-0.650889	0.515118	0.729448	2
ARL6IP4	-0.0785338	-0.650403	0.515432	0.729448	2
STOML2	-0.108921	-0.64512	0.51885	0.733753	2
RNF7	-0.10026	-0.644194	0.51945	0.734071	2
PLAC9	-0.1784	-0.642367	0.520635	0.735213	2
MAP7D1	-0.109947	-0.637078	0.524074	0.738476	2
SPTBN1	-0.107955	-0.636504	0.524448	0.738476	2
SURF4	0.102349	0.636345	0.524551	0.738476	2
ENY2	0.0713414	0.635012	0.525421	0.738476	2
ALG5	-0.0700132	-0.634847	0.525528	0.738476	2
KXD1	-0.0942599	-0.634254	0.525915	0.738476	2
TMEM167A	-0.0949192	-0.633269	0.526558	0.738476	2
MT1X	-0.273332	-0.633201	0.526603	0.738476	2
CDK4	0.0999208	0.632178	0.527271	0.738476	2
ARPC3	-0.0718996	-0.632143	0.527294	0.738476	2
MRPS21	-0.0676549	-0.630895	0.528109	0.738476	2
CAPN1	-0.0861334	-0.630608	0.528297	0.738476	2
NKTR	0.0787118	0.630384	0.528444	0.738476	2
TSPAN3	-0.117153	-0.630378	0.528447	0.738476	2
PCNP	-0.0745249	-0.630118	0.528617	0.738476	2
PRRC2C	0.0682088	0.629505	0.529018	0.738508	2
GSTK1	0.0709634	0.628862	0.52944	0.738568	2
TUSC2	0.0975717	0.627633	0.530244	0.739163	2
CBX6	0.0978059	0.624847	0.532072	0.74063	2
MRPL52	0.072924	0.624827	0.532085	0.74063	2
IMPDH2	0.110331	0.624294	0.532435	0.74063	2
MRPS18C	0.0943943	0.62004	0.535232	0.743832	2
NECAP2	0.104626	0.619635	0.535498	0.743832	2
PIN4	-0.139189	-0.618313	0.536369	0.744512	2
LMAN2	-0.0859757	-0.615776	0.538042	0.746071	2
PARL	0.0525269	0.615009	0.538549	0.746071	2
COX7C	-0.0753036	-0.613933	0.53926	0.746071	2
ALKBH7	-0.0984468	-0.613815	0.539337	0.746071	2
PPIB	-0.0846619	-0.613717	0.539402	0.746071	2
RNH1	-0.088464	-0.612641	0.540114	0.746368	2
PIGP	0.113381	0.612191	0.540411	0.746368	2
PDK4	0.161705	0.611659	0.540763	0.746368	2
NOSIP	0.0922452	0.610039	0.541836	0.74732	2
DEK	0.0654639	0.608533	0.542834	0.748169	2
IFITM2	-0.117582	-0.607492	0.543524	0.748592	2
NAP1L1	0.0814394	0.606545	0.544153	0.748791	2
PLEKHB2	-0.088446	-0.606119	0.544436	0.748791	2
COA3	0.109831	0.6042	0.545711	0.749634	2
ILF3	-0.104704	-0.604041	0.545816	0.749634	2
CRTAP	-0.0798792	-0.602407	0.546903	0.750222	2
ARL6IP1	-0.121119	-0.602127	0.54709	0.750222	2
CAST	-0.0747116	-0.601666	0.547397	0.750222	2
RNPS1	0.0778354	0.600845	0.547943	0.750444	2
SRSF3	0.0741003	0.599302	0.548971	0.751325	2
FBXL15	0.126583	0.598227	0.549689	0.75178	2
NFU1	0.0637953	0.597185	0.550384	0.75182	2
HIGD1A	-0.103395	-0.597029	0.550488	0.75182	2
ACTR3	-0.0646657	-0.594673	0.552062	0.753083	2
RPS14	-0.0685302	-0.594248	0.552347	0.753083	2
VDAC3	-0.0595013	-0.593915	0.552569	0.753083	2
RSU1	-0.0660867	-0.591924	0.553901	0.754372	2
MANF	-0.108365	-0.590413	0.554914	0.754522	2
C9orf78	-0.0675672	-0.590317	0.554978	0.754522	2
PSMA3-AS1	-0.0640705	-0.589769	0.555346	0.754522	2
ANAPC13	0.0962927	0.588879	0.555942	0.754522	2
LSM5	0.0859779	0.588878	0.555943	0.754522	2
PPIC	0.0820233	0.587778	0.556681	0.754909	2
DUSP3	-0.0901574	-0.587301	0.557002	0.754909	2
BROX	0.0716992	0.58482	0.558669	0.756644	2
ARL5A	0.068781	0.583969	0.559241	0.756894	2
LARP7	0.0655216	0.582256	0.560394	0.757929	2
RPL29	0.0635395	0.580946	0.561277	0.758097	2
TMEM50A	-0.074899	-0.58092	0.561294	0.758097	2
CGGBP1	-0.072878	-0.579635	0.562161	0.758371	2
SLC25A39	0.117124	0.579289	0.562394	0.758371	2
RHBDD2	0.0820122	0.578294	0.563065	0.758371	2
RPS13	-0.0605212	-0.578151	0.563162	0.758371	2
PIK3IP1	0.115513	0.577741	0.563439	0.758371	2
HSPE1	0.147668	0.57661	0.564203	0.758477	2
HSPH1	0.168585	0.576163	0.564505	0.758477	2
NINJ1	-0.106	-0.5759	0.564683	0.758477	2
CAPRIN1	0.0548679	0.575215	0.565146	0.758578	2
C4orf3	0.0711541	0.573781	0.566116	0.758832	2
PSMA2	-0.0891501	-0.573489	0.566314	0.758832	2
PPP1CC	0.0723178	0.572801	0.56678	0.758832	2
UQCRC1	-0.082114	-0.572438	0.567025	0.758832	2
KDM6B	0.125399	0.571663	0.56755	0.758832	2
ILK	-0.0926614	-0.571491	0.567667	0.758832	2
BUD31	0.0885993	0.57048	0.568352	0.759228	2
LEPROT	-0.0788496	-0.568934	0.569401	0.759315	2
NUS1	-0.0720506	-0.568674	0.569577	0.759315	2
UBB	-0.132449	-0.568665	0.569584	0.759315	2
MYLIP	0.111567	0.566909	0.570776	0.759488	2
UBE2K	0.0559538	0.566703	0.570916	0.759488	2
SKAP2	0.0886761	0.566644	0.570956	0.759488	2
GTF2B	0.0761557	0.566184	0.571269	0.759488	2
FXYD3	-0.198872	-0.564866	0.572165	0.759852	2
CMPK1	0.0504904	0.564637	0.572321	0.759852	2
PDIA3	-0.0795728	-0.559713	0.575675	0.763786	2
SRSF9	0.0705705	0.55864	0.576408	0.764239	2
SDHC	0.0590311	0.556414	0.577928	0.765266	2
CALM1	-0.0676778	-0.556358	0.577966	0.765266	2
MAFF	0.123825	0.555403	0.578619	0.765611	2
TCIRG1	-0.11801	-0.554779	0.579046	0.765658	2
DCN	0.183171	0.553833	0.579693	0.765863	2
MED28	0.0665428	0.553407	0.579985	0.765863	2
MLF2	0.0852243	0.552459	0.580634	0.766201	2
CCL2	0.195709	0.55041	0.582038	0.766938	2
SPG21	-0.0620219	-0.549996	0.582322	0.766938	2
RTF1	-0.0685217	-0.549723	0.58251	0.766938	2
ALDH1A1	-0.114608	-0.549354	0.582763	0.766938	2
TPST2	0.0977646	0.54858	0.583294	0.76712	2
CREM	0.0866485	0.547164	0.584266	0.767881	2
SERINC3	0.0733134	0.545416	0.585468	0.768164	2
ERH	-0.0716928	-0.544661	0.585987	0.768164	2
LGMN	0.0899054	0.544659	0.585988	0.768164	2
SERTAD1	0.117479	0.543158	0.587021	0.768164	2
TMA7	-0.0680403	-0.542848	0.587234	0.768164	2
PICALM	0.097747	0.5425	0.587474	0.768164	2
PHB2	0.0769967	0.542341	0.587584	0.768164	2
STUB1	0.10871	0.541955	0.587849	0.768164	2
RPS3A	-0.052566	-0.541706	0.588021	0.768164	2
AP2M1	0.0674871	0.540509	0.588846	0.768728	2
TSPAN4	0.108254	0.539632	0.589451	0.769003	2
NDUFC2	-0.0618047	-0.538512	0.590223	0.769497	2
EAPP	-0.0700307	-0.536468	0.591635	0.770823	2
MAPK1IP1L	-0.0692846	-0.535364	0.592398	0.771302	2
CD2BP2	-0.0887533	-0.534352	0.593098	0.771586	2
MRPS26	0.102362	0.533907	0.593406	0.771586	2
CPNE1	-0.0712415	-0.532642	0.594281	0.77221	2
FBXO7	0.0555406	0.53092	0.595474	0.773198	2
RRBP1	0.0813333	0.529552	0.596422	0.773198	2
SRRM1	-0.067444	-0.529451	0.596492	0.773198	2
SCAND1	-0.0800085	-0.529259	0.596626	0.773198	2
GPSM3	-0.108778	-0.527864	0.597594	0.773496	2
SNX17	0.0777391	0.527786	0.597648	0.773496	2
RPAIN	0.0480125	0.523938	0.600321	0.775343	2
SEC62	0.0502018	0.523821	0.600403	0.775343	2
HNRNPC	0.054429	0.523707	0.600482	0.775343	2
EIF3D	0.0681968	0.523449	0.600662	0.775343	2
C19orf53	0.0604803	0.521817	0.601798	0.776296	2
SHARPIN	-0.0925263	-0.520688	0.602584	0.776796	2
GNAI3	0.06113	0.519893	0.603138	0.776998	2
COPS8	0.0808271	0.51886	0.603858	0.777413	2
SSNA1	-0.0933365	-0.516848	0.605262	0.778707	2
EIF3L	-0.0485324	-0.514615	0.606822	0.7802	2
RPL38	0.0786804	0.513243	0.607781	0.780454	2
MIEN1	-0.0872141	-0.512525	0.608284	0.780454	2
ARHGDIA	-0.0868169	-0.512363	0.608397	0.780454	2
GYG1	-0.0716393	-0.512047	0.608618	0.780454	2
RABAC1	-0.078361	-0.508899	0.610823	0.782768	2
RPL6	-0.0516126	-0.507633	0.61171	0.78339	2
DDAH2	0.0914189	0.505578	0.613153	0.783949	2
NAA10	0.0819466	0.505413	0.613269	0.783949	2
JUND	0.110323	0.505296	0.613351	0.783949	2
CALM2	-0.0453782	-0.501141	0.616272	0.787167	2
CCDC47	-0.0708386	-0.49959	0.617364	0.788046	2
RPS20	-0.0573594	-0.497976	0.618501	0.788375	2
FKBP5	-0.119937	-0.497573	0.618785	0.788375	2
AIP	-0.0727167	-0.497506	0.618832	0.788375	2
CAV1	-0.128481	-0.496929	0.619239	0.788379	2
EIF4A1	-0.072196	-0.495672	0.620126	0.788626	2
PDCD6IP	0.052374	0.494877	0.620687	0.788626	2
CANX	-0.054652	-0.494869	0.620692	0.788626	2
CCNG1	0.0650071	0.494366	0.621048	0.788626	2
ATP6V1C1	0.0516382	0.490992	0.623432	0.791139	2
PCBP2	0.0404886	0.486517	0.6266	0.794643	2
BTF3	-0.0514018	-0.482423	0.629506	0.797809	2
MRPL40	0.0712971	0.479251	0.63176	0.7999	2
CMC1	-0.0760233	-0.478482	0.632307	0.7999	2
GABPB1	0.0646067	0.478374	0.632384	0.7999	2
IK	-0.0817278	-0.477388	0.633086	0.800269	2
HNRNPU	-0.0602357	-0.475385	0.634512	0.801554	2
SUPT5H	-0.0830978	-0.47398	0.635514	0.8023	2
TUFM	-0.0714028	-0.471808	0.637064	0.803738	2
PGAM1	0.0715429	0.467358	0.640244	0.806805	2
KTN1	0.0398579	0.466582	0.640799	0.806805	2
TIAL1	0.0421163	0.466449	0.640894	0.806805	2
CELF1	0.0337837	0.465987	0.641225	0.806805	2
SPCS1	-0.0583987	-0.465103	0.641858	0.806805	2
AURKAIP1	-0.0714088	-0.464941	0.641974	0.806805	2
CASP4	0.052534	0.462916	0.643424	0.807759	2
NDUFB1	-0.0583415	-0.462291	0.643872	0.807759	2
NDUFAF3	0.0723004	0.46148	0.644454	0.807759	2
RPS4X	0.0633929	0.46144	0.644483	0.807759	2
MRPS6	-0.0783078	-0.460734	0.644989	0.807759	2
TOMM7	0.0663832	0.460281	0.645315	0.807759	2
MRPL21	-0.064238	-0.459844	0.645628	0.807759	2
RPS18	-0.0544914	-0.45883	0.646356	0.808153	2
SNHG8	0.0735959	0.457336	0.647429	0.80885	2
BCKDK	-0.0742345	-0.456477	0.648047	0.80885	2
DNPH1	0.0851443	0.456221	0.648231	0.80885	2
BRD4	0.0441169	0.455396	0.648824	0.80885	2
PET100	0.0819044	0.455172	0.648985	0.80885	2
PRDX2	-0.0725725	-0.453295	0.650336	0.810017	2
EEF1D	-0.0509875	-0.451706	0.651481	0.810879	2
RNF144B	-0.0896569	-0.450792	0.65214	0.810879	2
MIDN	-0.0918185	-0.450606	0.652274	0.810879	2
NDUFS7	-0.0643803	-0.449898	0.652784	0.810997	2
CBX3	0.0456384	0.448811	0.653568	0.811454	2
THUMPD3-AS1	-0.0705908	-0.447438	0.654559	0.812121	2
PYURF	0.0693885	0.445081	0.656261	0.812121	2
SYNCRIP	-0.0485586	-0.444654	0.65657	0.812121	2
TMEM141	0.0722372	0.444513	0.656672	0.812121	2
CUEDC2	-0.0644067	-0.444225	0.65688	0.812121	2
FAM200B	-0.062901	-0.444173	0.656918	0.812121	2
MRPL18	0.075492	0.444037	0.657016	0.812121	2
YWHAQ	0.0554201	0.4426	0.658055	0.812529	2
CRELD2	0.0975054	0.44243	0.658178	0.812529	2
COX14	-0.0585729	-0.441188	0.659077	0.813125	2
MTX1	0.074607	0.439336	0.660418	0.813174	2
RPS6	-0.0577765	-0.439313	0.660434	0.813174	2
AGTRAP	-0.06674	-0.43908	0.660604	0.813174	2
ATP6AP2	-0.0537985	-0.437592	0.661682	0.813174	2
ARHGDIB	0.0796512	0.436873	0.662203	0.813174	2
JTB	-0.0604211	-0.436566	0.662426	0.813174	2
ACADVL	-0.0805805	-0.43625	0.662656	0.813174	2
MAF1	-0.0745582	-0.435849	0.662946	0.813174	2
RCN2	0.0524681	0.435704	0.663051	0.813174	2
ITGB1	0.0551697	0.435389	0.66328	0.813174	2
TRAPPC1	-0.0550858	-0.434781	0.663721	0.813204	2
TIMM13	0.0507073	0.429098	0.667852	0.817607	2
TNFSF13B	-0.114157	-0.428685	0.668152	0.817607	2
PPP1R12A	0.0531438	0.427155	0.669266	0.818458	2
PABPC4	-0.0604487	-0.42648	0.669758	0.818547	2
PDCL3	-0.0779322	-0.424387	0.671283	0.819898	2
RARRES2	0.117856	0.423422	0.671988	0.820245	2
TUBA1C	0.0558802	0.421577	0.673334	0.820928	2
RPL8	-0.0437148	-0.421503	0.673388	0.820928	2
CAV2	-0.100596	-0.420688	0.673983	0.821141	2
SUMO2	0.0433787	0.417242	0.676502	0.823695	2
FAM133B	0.0442793	0.414112	0.678792	0.825798	2
EIF3I	-0.0665156	-0.413614	0.679157	0.825798	2
RPL30	0.0499044	0.412749	0.679791	0.825798	2
PRKAR1A	-0.0510373	-0.412573	0.67992	0.825798	2
RPS7	-0.03936	-0.411822	0.68047	0.825879	2
MOB1A	-0.050549	-0.411327	0.680832	0.825879	2
TPM2	-0.10575	-0.409675	0.682045	0.826836	2
MFF	0.0491691	0.408867	0.682637	0.827041	2
RGS10	-0.0636574	-0.408041	0.683244	0.827263	2
CFAP36	0.0448314	0.407269	0.68381	0.827436	2
CYTH1	-0.0494671	-0.403916	0.686275	0.829904	2
TMEM165	-0.0526726	-0.403162	0.686829	0.83006	2
TXN2	0.0549292	0.400496	0.688791	0.831902	2
NUTF2	0.0601111	0.398643	0.690156	0.831902	2
DHRS4L2	-0.0832803	-0.398265	0.690435	0.831902	2
NAPRT	0.0841146	0.398117	0.690544	0.831902	2
SSR2	0.047142	0.397542	0.690968	0.831902	2
HSD17B11	0.0617362	0.397316	0.691134	0.831902	2
PITHD1	-0.0528655	-0.397045	0.691335	0.831902	2
SNX3	0.0404825	0.393917	0.693642	0.833961	2
EIF1AY	0.374157	0.393431	0.694001	0.833961	2
MRPS34	0.0631919	0.392731	0.694518	0.833961	2
CALR	0.0740819	0.392412	0.694754	0.833961	2
PHPT1	0.0601877	0.389011	0.697268	0.836409	2
ECHS1	0.0585685	0.388494	0.69765	0.836409	2
RPL23A	-0.0416453	-0.387692	0.698244	0.836608	2
MAPK1	-0.0490476	-0.38636	0.69923	0.837276	2
SEC63	-0.0392807	-0.384312	0.700747	0.838578	2
ATG101	0.0693738	0.38076	0.703382	0.841127	2
CCND3	0.0517246	0.379932	0.703996	0.841127	2
GRHPR	-0.0416913	-0.379699	0.704169	0.841127	2
ATOX1	-0.0440988	-0.378111	0.705348	0.841341	2
TNFAIP2	0.0777186	0.377817	0.705567	0.841341	2
CLDND1	0.0662511	0.377716	0.705641	0.841341	2
RAB9A	0.0559486	0.376443	0.706588	0.841449	2
LSM7	0.0562387	0.375708	0.707134	0.841449	2
CD48	0.0756659	0.375127	0.707566	0.841449	2
ATF4	0.05084	0.375098	0.707588	0.841449	2
COX7A2	0.0627608	0.374435	0.70808	0.841449	2
SRP72	0.0431921	0.374118	0.708317	0.841449	2
MRPS14	0.05284	0.368171	0.712746	0.845699	2
DAB2	-0.0531104	-0.368042	0.712842	0.845699	2
LAP3	0.065243	0.367571	0.713193	0.845699	2
GADD45G	0.0971109	0.366562	0.713946	0.846078	2
ODC1	-0.0783011	-0.363732	0.716058	0.848066	2
SLIRP	0.0461626	0.362377	0.71707	0.848199	2
RPL36	-0.0378416	-0.361938	0.717398	0.848199	2
CASP1	-0.0728673	-0.360537	0.718445	0.848199	2
TRA2B	0.0535459	0.360302	0.718622	0.848199	2
TNFRSF1A	0.0415596	0.359932	0.718898	0.848199	2
SSR1	-0.0364276	-0.359548	0.719185	0.848199	2
DARS	-0.0399975	-0.359514	0.71921	0.848199	2
DNAJA1	0.0760596	0.358929	0.719648	0.848203	2
NACA	0.0358283	0.358047	0.720308	0.848469	2
SNRPC	-0.0517649	-0.355397	0.722292	0.850293	2
YIF1A	-0.0568614	-0.354375	0.723058	0.850682	2
TXNDC12	-0.0365151	-0.353355	0.723823	0.851069	2
IL10RB	0.0480263	0.348581	0.727404	0.854765	2
NDUFB3	-0.053143	-0.347639	0.728111	0.855082	2
PSMB2	-0.0368202	-0.346473	0.728987	0.855216	2
CD74	0.105333	0.346322	0.729101	0.855216	2
TSG101	-0.0337011	-0.345685	0.72958	0.855264	2
CSNK2B	-0.0436891	-0.34418	0.730711	0.855498	2
ACP1	-0.0425692	-0.343953	0.730881	0.855498	2
ETNK1	0.050707	0.342785	0.73176	0.855498	2
HES1	0.093569	0.34274	0.731794	0.855498	2
FNTA	-0.0348856	-0.342393	0.732055	0.855498	2
RPL35A	-0.0350034	-0.341261	0.732907	0.855498	2
ARL2BP	-0.0607129	-0.341075	0.733047	0.855498	2
CDK5RAP3	0.068452	0.340761	0.733284	0.855498	2
CDC37	-0.0622096	-0.340065	0.733807	0.855597	2
SAT2	-0.0631953	-0.338561	0.734941	0.856408	2
WNK1	-0.0431973	-0.337482	0.735754	0.856844	2
UBE2J1	-0.0526763	-0.33576	0.737052	0.857605	2
RPS21	-0.0456236	-0.335067	0.737574	0.857605	2
NHP2	-0.0557097	-0.334868	0.737725	0.857605	2
CD151	0.060701	0.333077	0.739076	0.85857	2
PDCD6	-0.0293437	-0.332603	0.739434	0.85857	2
FKBP11	0.0521918	0.331604	0.740189	0.858935	2
RALY	0.0417513	0.330075	0.741343	0.859764	2
EDF1	0.0341543	0.325484	0.744815	0.863278	2
EPAS1	0.0814351	0.320919	0.748272	0.866429	2
POLR2J	-0.0619753	-0.320723	0.748421	0.866429	2
PAPOLA	-0.0294361	-0.320086	0.748903	0.866474	2
COA4	0.0417988	0.319449	0.749386	0.866519	2
UFM1	-0.0644672	-0.316376	0.751717	0.8687	2
C14orf119	-0.0493212	-0.315276	0.752552	0.869151	2
MDH1	-0.0416796	-0.314614	0.753055	0.869217	2
ATP13A3	0.06634	0.313132	0.754181	0.870003	2
BIRC3	-0.0740442	-0.31242	0.754721	0.870113	2
DBNL	0.0381427	0.310085	0.756497	0.870802	2
MPG	0.0544562	0.310026	0.756542	0.870802	2
DDRGK1	-0.0504314	-0.309874	0.756657	0.870802	2
MT1A	-0.185644	-0.309145	0.757212	0.870927	2
NFIC	-0.0322814	-0.307181	0.758705	0.871322	2
AP3S1	-0.0448003	-0.306969	0.758867	0.871322	2
THRAP3	0.0262856	0.306818	0.758982	0.871322	2
COX20	-0.0363746	-0.306007	0.7596	0.871322	2
MS4A6A	0.0797375	0.305762	0.759786	0.871322	2
DDX21	0.0541326	0.303863	0.761233	0.872128	2
ZBTB8OS	-0.0288987	-0.303667	0.761381	0.872128	2
GNAQ	-0.0461885	-0.301567	0.762982	0.87295	2
PSMD4	0.0376731	0.300769	0.76359	0.87295	2
KLF9	-0.0700663	-0.300527	0.763775	0.87295	2
RAB5A	0.0363267	0.30038	0.763887	0.87295	2
TMSB10	0.0389043	0.297682	0.765946	0.873974	2
TUBA1B	0.0606097	0.297655	0.765967	0.873974	2
ETFA	-0.0251323	-0.297446	0.766126	0.873974	2
PLSCR1	0.0477405	0.296689	0.766704	0.874123	2
CORO1B	-0.0551068	-0.294177	0.768623	0.8758	2
TMED10	0.0336758	0.292099	0.770211	0.877098	2
NDUFA5	0.0398337	0.289266	0.772378	0.879052	2
ICAM1	0.0738696	0.287948	0.773386	0.879687	2
TOMM22	-0.0497592	-0.28625	0.774687	0.880654	2
ZDHHC3	-0.0460329	-0.285376	0.775356	0.880902	2
HDAC2	0.0327065	0.284157	0.77629	0.88145	2
UQCRC2	0.0272879	0.283503	0.776791	0.881507	2
APRT	-0.0417339	-0.280304	0.779245	0.883428	2
EMC6	-0.0474315	-0.27987	0.779577	0.883428	2
CSRNP1	0.0576515	0.279364	0.779966	0.883428	2
UBE2N	0.0396469	0.278936	0.780294	0.883428	2
WTAP	-0.0378258	-0.275792	0.782708	0.885531	2
PUF60	-0.0533521	-0.275256	0.783119	0.885531	2
SLC25A37	0.0389218	0.273965	0.784111	0.885531	2
TOMM20	0.0328661	0.273885	0.784173	0.885531	2
NCOA4	-0.0352552	-0.273566	0.784419	0.885531	2
DYNLT1	-0.0341044	-0.271703	0.785851	0.886377	2
CLTB	0.0430448	0.270892	0.786474	0.886377	2
YY1	0.0381882	0.27082	0.78653	0.886377	2
TPI1	-0.0385514	-0.269898	0.787239	0.886507	2
CLDN7	-0.0566979	-0.26949	0.787552	0.886507	2
PMPCB	0.0276233	0.267893	0.788782	0.886935	2
CRK	0.0353108	0.267816	0.788841	0.886935	2
HLA-E	-0.0402552	-0.26537	0.790724	0.888097	2
MDH2	0.0368109	0.265293	0.790784	0.888097	2
TM2D1	-0.028903	-0.262792	0.792711	0.889749	2
GOLGB1	-0.0443382	-0.260927	0.794148	0.890143	2
CMTM6	0.0476749	0.260576	0.794419	0.890143	2
DGUOK	-0.0291484	-0.260315	0.794621	0.890143	2
DUT	-0.0308138	-0.259479	0.795266	0.890143	2
CNPY2	0.0312797	0.259383	0.79534	0.890143	2
PSMD13	0.0284316	0.257846	0.796526	0.890959	2
ANAPC5	-0.028329	-0.256057	0.797907	0.891573	2
HSPA1B	-0.132329	-0.255745	0.798148	0.891573	2
MRPL13	-0.0328679	-0.255362	0.798444	0.891573	2
HBP1	0.0415385	0.253923	0.799555	0.892303	2
KLF10	0.0498272	0.25173	0.801249	0.892757	2
XIST	-0.388908	-0.251597	0.801353	0.892757	2
GRB2	0.0271138	0.251087	0.801747	0.892757	2
ANKRD11	0.0303775	0.251031	0.80179	0.892757	2
METTL7A	-0.0578776	-0.249916	0.802652	0.892791	2
SNRPD3	-0.0350175	-0.249809	0.802735	0.892791	2
CFD	0.0569067	0.246582	0.805232	0.895059	2
SNRPD1	-0.0324177	-0.244452	0.80688	0.896067	2
FOXO3	0.042139	0.244224	0.807057	0.896067	2
POLR3GL	-0.0367227	-0.24289	0.808091	0.896539	2
ATG3	-0.029948	-0.24239	0.808478	0.896539	2
SCO2	-0.0571326	-0.241898	0.808859	0.896539	2
RPL34	0.0329279	0.239875	0.810427	0.897653	2
SPATS2L	-0.02796	-0.239415	0.810784	0.897653	2
CYB5A	-0.0449412	-0.238141	0.811772	0.898222	2
RPL13A	0.0252153	0.237567	0.812217	0.898222	2
C7orf50	0.0294718	0.236758	0.812844	0.898407	2
RPS19BP1	-0.0342573	-0.233397	0.815453	0.900393	2
HNRNPR	-0.0206877	-0.233256	0.815563	0.900393	2
BAX	-0.0453963	-0.231589	0.816857	0.901312	2
RPL27A	0.0218757	0.228909	0.818939	0.903099	2
RPL26	-0.0232143	-0.227415	0.820101	0.90387	2
CFDP1	0.0208065	0.225972	0.821223	0.904596	2
NXT1	-0.0419752	-0.223474	0.823166	0.906226	2
HNRNPA0	-0.0340581	-0.221405	0.824777	0.907487	2
FLNA	-0.0494094	-0.218173	0.827294	0.908672	2
PARK7	-0.0243226	-0.218061	0.827382	0.908672	2
PHIP	-0.0239613	-0.217965	0.827456	0.908672	2
KIF5B	-0.020981	-0.217633	0.827715	0.908672	2
IL13RA1	-0.030945	-0.216627	0.828499	0.909022	2
TAF12	0.0289621	0.214986	0.829778	0.909914	2
MRPL4	-0.0390617	-0.213659	0.830813	0.910118	2
MRPL27	0.0263158	0.213254	0.831129	0.910118	2
POLR2I	-0.031043	-0.212954	0.831363	0.910118	2
PA2G4	-0.027048	-0.209133	0.834344	0.912653	2
LLPH	-0.0279195	-0.20879	0.834613	0.912653	2
RAB11A	-0.0276341	-0.207853	0.835344	0.912941	2
NUDC	0.0291863	0.205616	0.837091	0.914303	2
C11orf58	0.0181027	0.204894	0.837655	0.914303	2
FUNDC2	0.0272972	0.20446	0.837994	0.914303	2
RPS10	-0.0275593	-0.201407	0.84038	0.915966	2
ZNF593	-0.0367913	-0.201309	0.840457	0.915966	2
SFT2D1	-0.0196469	-0.200183	0.841338	0.916153	2
PRKRA	0.0280714	0.199891	0.841566	0.916153	2
SDF4	0.0293479	0.195337	0.845129	0.9193	2
SLC35B1	0.0274373	0.194993	0.845399	0.9193	2
H3F3A	0.0200006	0.191012	0.848516	0.922177	2
EPB41L4A-AS1	0.0294584	0.189372	0.849801	0.9227	2
POLR2H	0.0326082	0.189192	0.849942	0.9227	2
EIF3H	-0.0213425	-0.187804	0.851031	0.92307	2
NANS	0.0328602	0.187187	0.851514	0.92307	2
CLEC2B	-0.0391032	-0.186948	0.851701	0.92307	2
TECR	0.0317763	0.18423	0.853833	0.924694	2
NFKBIZ	-0.0318396	-0.183352	0.854522	0.924694	2
CISD2	0.0273152	0.182118	0.85549	0.924694	2
COMMD7	0.0214997	0.182026	0.855563	0.924694	2
BCLAF1	0.0207391	0.182021	0.855566	0.924694	2
MPHOSPH8	0.0299857	0.179349	0.857664	0.926447	2
CHD1	-0.0216029	-0.177389	0.859203	0.927597	2
RAD23B	-0.0201961	-0.175057	0.861035	0.928129	2
CHTOP	0.0184094	0.175025	0.86106	0.928129	2
RHOA	-0.0171916	-0.174703	0.861313	0.928129	2
TMEM9B	0.0243969	0.174282	0.861644	0.928129	2
SNHG15	0.0321065	0.172839	0.862778	0.928129	2
GTF2I	0.0157494	0.172629	0.862943	0.928129	2
RALA	-0.0332095	-0.172528	0.863022	0.928129	2
SEC61G	-0.0276149	-0.171758	0.863628	0.928269	2
SH3BP5	0.0288602	0.168946	0.865839	0.930115	2
TMBIM4	-0.018687	-0.168363	0.866297	0.930115	2
NDUFB10	0.0194818	0.164899	0.869024	0.93165	2
NT5C	-0.0273839	-0.164796	0.869104	0.93165	2
MRPS36	-0.0268137	-0.164728	0.869158	0.93165	2
PTGER4	0.0294192	0.160272	0.872667	0.934576	2
MBNL1	-0.0228138	-0.159114	0.873579	0.934576	2
SNRPB2	-0.0249693	-0.157046	0.875208	0.934576	2
ARL4C	0.0330899	0.156995	0.875249	0.934576	2
HMGN3	0.024246	0.156026	0.876013	0.934576	2
ORMDL2	0.0275959	0.155256	0.876619	0.934576	2
ATP1B1	-0.040455	-0.154714	0.877047	0.934576	2
TRIM44	0.0168615	0.154421	0.877277	0.934576	2
TMEM248	0.0154311	0.154058	0.877564	0.934576	2
RNF213	0.0216779	0.153603	0.877923	0.934576	2
DRAM2	0.0212795	0.153456	0.878039	0.934576	2
TBCA	0.0189643	0.153418	0.878068	0.934576	2
RPN2	-0.0186402	-0.153367	0.878109	0.934576	2
OPTN	-0.0255697	-0.15031	0.88052	0.936147	2
CHD9	0.0146786	0.15028	0.880544	0.936147	2
PPP2R3C	0.0188618	0.148703	0.881788	0.93696	2
LMO4	0.0228649	0.147476	0.882756	0.937479	2
PAK2	0.0136616	0.145445	0.88436	0.938671	2
C1S	-0.0259282	-0.144353	0.885222	0.939076	2
CLPP	0.0187867	0.143554	0.885853	0.939083	2
OST4	0.0170597	0.143127	0.88619	0.939083	2
EIF3K	0.0130488	0.140443	0.88831	0.940819	2
EIF4E	0.0174362	0.138323	0.889985	0.942082	2
ABI1	0.0172004	0.137021	0.891014	0.942204	2
PIN1	0.0185958	0.136957	0.891065	0.942204	2
TMEM219	0.0166745	0.134471	0.89303	0.94377	2
KRTCAP2	0.018816	0.132762	0.894381	0.944687	2
PPA2	0.0190137	0.129275	0.89714	0.947089	2
NDUFA2	0.0176803	0.128477	0.897772	0.947244	2
G3BP1	0.0137146	0.127565	0.898493	0.947493	2
DHX36	0.0151381	0.126246	0.899537	0.948082	2
CHCHD2	-0.0135104	-0.124671	0.900784	0.948884	2
ICAM2	0.0251869	0.122705	0.90234	0.950011	2
PLEKHJ1	-0.0247864	-0.12201	0.902891	0.950079	2
ELAVL1	-0.010957	-0.121091	0.903619	0.950332	2
SNF8	-0.0158713	-0.119448	0.90492	0.951079	2
OLA1	-0.0180468	-0.118965	0.905303	0.951079	2
PARP14	0.0203953	0.118046	0.906032	0.951333	2
CTNNA1	-0.0148753	-0.115553	0.908007	0.952812	2
PABPN1	0.0216879	0.115037	0.908416	0.952812	2
VPS28	-0.0159985	-0.113192	0.909878	0.953834	2
PERP	0.0342833	0.111351	0.911338	0.954852	2
MUC1	-0.0324689	-0.109352	0.912923	0.955999	2
PNISR	0.0156702	0.106255	0.91538	0.95786	2
RPL10	0.010038	0.105876	0.915681	0.95786	2
MMADHC	-0.012137	-0.105059	0.916329	0.958025	2
LSM4	-0.0141389	-0.101439	0.919202	0.960514	2
DERL2	-0.0128872	-0.100027	0.920323	0.961171	2
DCTN3	-0.013527	-0.0985659	0.921483	0.961869	2
GPR137B	-0.0141712	-0.0971464	0.92261	0.962389	2
FAAP20	0.0159742	0.0964888	0.923132	0.962389	2
SLU7	-0.0127332	-0.0958956	0.923603	0.962389	2
RPLP1	0.0121685	0.0954566	0.923952	0.962389	2
TSTD1	-0.0224822	-0.0933172	0.925652	0.963056	2
RAB10	0.011318	0.0929614	0.925934	0.963056	2
TMCO1	-0.0091672	-0.0921044	0.926615	0.963056	2
NELFE	0.0134157	0.0917078	0.92693	0.963056	2
RPL3	-0.0121583	-0.0915463	0.927059	0.963056	2
RPL23	-0.0112938	-0.0853998	0.931944	0.967616	2
RPL18	-0.00941343	-0.0838242	0.933196	0.968402	2
DNAJB1	0.0298319	0.0822369	0.934458	0.969197	2
MEA1	0.0127602	0.0813151	0.935191	0.969442	2
FLOT1	-0.0111084	-0.0787853	0.937203	0.971012	2
RAB14	-0.00858193	-0.0746414	0.9405	0.973911	2
CHMP2A	0.00959754	0.0713209	0.943142	0.975298	2
NDFIP1	0.00797913	0.0711877	0.943248	0.975298	2
ARF5	-0.0114738	-0.0706887	0.943646	0.975298	2
SQSTM1	-0.0105411	-0.0704488	0.943836	0.975298	2
KPNB1	-0.00591397	-0.067114	0.946491	0.976709	2
POMP	-0.0104095	-0.0658094	0.94753	0.976709	2
ATG12	0.00583017	0.0656512	0.947655	0.976709	2
TRAPPC6A	0.0121503	0.0655925	0.947702	0.976709	2
ATP1A1	-0.0117997	-0.0655921	0.947703	0.976709	2
ABRACL	0.0112611	0.0630425	0.949733	0.978092	2
TMEM230	0.00732181	0.0626487	0.950046	0.978092	2
HSPD1	0.0101727	0.0593571	0.952668	0.980274	2
SFPQ	0.00735141	0.058322	0.953492	0.980606	2
DPM1	0.00833174	0.0568218	0.954687	0.980981	2
HSP90AB1	-0.00931367	-0.0566026	0.954862	0.980981	2
HAX1	0.00683392	0.0555633	0.95569	0.981315	2
WSB1	0.00683122	0.0526403	0.958019	0.98319	2
TPGS1	0.0102335	0.0494454	0.960564	0.985285	2
GUK1	-0.0063931	-0.0475779	0.962053	0.985931	2
NFE2L2	-0.00553483	-0.0472108	0.962345	0.985931	2
ERCC1	0.00808174	0.0467545	0.962709	0.985931	2
MRPL41	0.00704625	0.0454172	0.963775	0.986505	2
RPS28	0.00531872	0.0431587	0.965575	0.987695	2
MRPL36	-0.00856353	-0.0423495	0.96622	0.987695	2
REEP3	-0.00707996	-0.0418942	0.966583	0.987695	2
ENSA	-0.00456137	-0.0414214	0.96696	0.987695	2
MAX	0.0047156	0.0407106	0.967527	0.987757	2
PPCS	0.0045304	0.0382745	0.969469	0.988531	2
RPL12	-0.00373407	-0.0380628	0.969638	0.988531	2
ROMO1	0.00473292	0.0372863	0.970257	0.988531	2
APMAP	-0.00392451	-0.0372201	0.97031	0.988531	2
ASPH	-0.00564293	-0.036469	0.970908	0.988626	2
PTMA	-0.00395472	-0.0354798	0.971697	0.988913	2
PPP4C	-0.00495446	-0.0333196	0.97342	0.990082	2
NAA20	0.00398087	0.0327682	0.973859	0.990082	2
COX8A	-0.00490408	-0.031961	0.974503	0.990202	2
PFKL	-0.00545414	-0.0313491	0.974991	0.990202	2
PPP6C	0.00319067	0.029931	0.976122	0.990486	2
BRK1	-0.00345676	-0.0294741	0.976486	0.990486	2
RPLP2	-0.00348791	-0.0290904	0.976793	0.990486	2
RAB21	-0.00483582	-0.0260931	0.979183	0.992395	2
TSEN34	0.00537511	0.022807	0.981804	0.994028	2
HDLBP	-0.0022685	-0.022796	0.981813	0.994028	2
NDUFS6	-0.00258706	-0.0220301	0.982424	0.994132	2
CCT2	-0.00293863	-0.021045	0.98321	0.994379	2
TPM3	-0.00277024	-0.0203178	0.98379	0.994379	2
ELF3	0.00726919	0.019458	0.984476	0.994379	2
NAA38	-0.00277295	-0.0191705	0.984705	0.994379	2
AIDA	0.00250327	0.0169668	0.986463	0.994784	2
RPS27A	-0.00182364	-0.0169139	0.986505	0.994784	2
DNAJB11	0.00246455	0.0162977	0.986997	0.994784	2
HNRNPUL1	-0.00141355	-0.0161142	0.987143	0.994784	2
ZCRB1	-0.00194878	-0.0154633	0.987663	0.994794	2
ACTR10	0.00113012	0.0113595	0.990937	0.997553	2
EIF3G	-0.00127192	-0.00980594	0.992176	0.997553	2
SRA1	-0.001396	-0.00959725	0.992343	0.997553	2
NDUFA9	-0.000989	-0.00946916	0.992445	0.997553	2
BTF3L4	-0.0009	-0.00769569	0.99386	0.998075	2
ZMAT2	-0.000929	-0.00721542	0.994243	0.998075	2
RPS29	-0.000914	-0.00648035	0.994829	0.998075	2
TFPI	0.00114307	0.00625558	0.995009	0.998075	2
GLIPR1	0.00110431	0.00507815	0.995948	0.998505	2
NDUFV1	4.87E-04	0.00343452	0.99726	0.999306	2
PPP1R2	2.15E-04	0.00150744	0.998797	0.999785	2
TMEM179B	1.84E-04	0.00103037	0.999178	0.999785	2
ZSWIM7	5.85E-05	4.51E-04	0.999641	0.999785	2
PRDX3	-3.46e-05	-0.000269	0.999785	0.999785	2

## Sheet: DEmeta_Epithelial_cells
Table S2: The differential genes of cell types in the training set
gene	logFC	Z	P.Value	adj.P	k
CAMK1D	2.271982822395925	11.890691777499057	1.3230616099607606e-32	9.433429279020223e-29	2
MDK	2.3069339864220293	9.01414634413891	1.9840964531610888e-19	7.073303855519281e-16	2
TMEM45A	2.457761261884474	8.732700698425631	2.4866247654261074e-18	5.909878192496048e-15	2
FABP5	-1.61647	-8.61332	7.097640471903684e-18	1.1392234476936927e-14	2
ZMAT3	1.6345744805627322	8.590663491289506	8.64685350654938e-18	1.1392234476936927e-14	2
STEAP3	1.665511912673231	8.578800800811976	9.586733080171328e-18	1.1392234476936927e-14	2
GOLM1	1.474682992131814	8.338444614659013	7.527407246778818e-17	7.667201952790424e-14	2
BLVRB	-1.15417	-7.95358	1.8120442281005146e-15	1.6149844182945837e-12	2
CRIP2	1.752863892697483	7.848648602451803	4.20544117655635e-15	3.331643954316308e-12	2
FADS1	-1.97119	-7.71592	1.2011294535736094e-14	8.564053003979835e-12	2
SDR16C5	-2.03047	-7.65246	1.9717006221704605e-14	1.2780204941886711e-11	2
GSTA4	-1.62605	-7.47731	7.586128020163997e-14	4.3238021987585434e-11	2
ARPC2	-0.838061	-7.47225	7.88351032031712e-14	4.3238021987585434e-11	2
CFH	1.6282084504416792	7.432134236020917	1.0685927168536947e-13	5.4421900508334594e-11	2
LSS	-1.34109	-7.38005	1.5823283290333946e-13	7.48222306262266e-11	2
IDI1	-1.39137	-7.36961	1.7112184399243875e-13	7.48222306262266e-11	2
MLX	-0.995299	-7.36406	1.7839802533602415e-13	7.48222306262266e-11	2
SLC4A4	1.4191105711933496	7.334222792115104	2.2301184666307612e-13	8.833747037265181e-11	2
ACAT2	-1.76963	-7.32429	2.4017305436975816e-13	9.012809882401977e-11	2
IFI16	1.221955808887672	7.301076228305309	2.8547494425440617e-13	1.017718176266958e-10	2
WBP1L	0.9035592225632579	7.228037916493711	4.900219315048045e-13	1.6637411293472649e-10	2
NECAB1	-3.58491	-7.217	5.314718831920318e-13	1.7224520577996301e-10	2
MDM2	0.8055553341932539	7.209554426989953	5.613525736498117e-13	1.7401929783144164e-10	2
STX11	-1.56296	-7.1217	1.0660679229294067e-12	3.167110121036112e-10	2
SPTSSA	-1.49553	-7.11106	1.1515218812164544e-12	3.284140405229328e-10	2
FHL2	2.59763478250158	7.099793643777802	1.2494330535818062e-12	3.426329873860876e-10	2
CLU	1.781604511484314	7.0750677569520954	1.4937575640616472e-12	3.944626456207239e-10	2
KIAA1324	1.7349111710922507	7.001663494880864	2.5294102397408104e-12	6.440962503339992e-10	2
HPCAL1	-1.80341	-6.98085	2.9340294135053607e-12	7.213665420101111e-10	2
MMP7	3.178722128704385	6.915821819989963	4.65158762276012e-12	1.1055273250093219e-9	2
ZNF561	0.867143826081464	6.899481323049093	5.21927496971239e-12	1.2004332430338496e-9	2
ATP6V0A1	-1.20558	-6.88488	5.783623760242066e-12	1.2886636690789354e-9	2
CP	2.373081674040431	6.824963935640434	8.794740654482914e-12	1.883922512467897e-9	2
ATP12A	2.9956939340129196	6.821912444670914	8.98364171443317e-12	1.883922512467897e-9	2
MCCC1	-1.2362	-6.81052	9.724442602830679e-12	1.981007878805221e-9	2
ADRB2	-1.62958	-6.72655	1.7373404759120193e-11	3.4408993314590826e-9	2
ACAT1	-1.01786	-6.69717	2.1248946816885326e-11	4.094729481199794e-9	2
ACADL	-2.02304	-6.63282	3.293288676107925e-11	6.179249542276185e-9	2
TMEM97	-1.67262	-6.58763	4.468921871264838e-11	8.170105882594434e-9	2
DUSP4	1.6246216972512295	6.579373752225224	4.724338495396836e-11	8.42113336804486e-9	2
HACD1	-1.65386	-6.56267	5.2852282531130903e-11	8.933227913437145e-9	2
SARS	-0.949723	-6.5614	5.3305764545534906e-11	8.933227913437145e-9	2
ST6GAL1	1.2255494415221366	6.559813801030906	5.3875007051584455e-11	8.933227913437145e-9	2
CLIC2	-1.36668	-6.54717	5.863906952904433e-11	9.385255328496775e-9	2
PSD3	1.2554931412769679	6.545658671588493	5.923372928223771e-11	9.385255328496775e-9	2
EDNRB	-2.34043	-6.5335	6.425010569893542e-11	9.95876638333499e-9	2
ACO1	-0.78006	-6.52344	6.871350612303505e-11	1.0423985077813615e-8	2
INSIG1	-1.35129	-6.50527	7.755442623299649e-11	1.1520063730026352e-8	2
EIF2S3	-0.678393	-6.48575	8.829373830348886e-11	1.284763987967093e-8	2
TMEM87A	-0.921344	-6.47172	9.689565947057553e-11	1.381732104050407e-8	2
CDCP1	0.968904509763619	6.451336629370022	1.1086792398809618e-10	1.5499770549708348e-8	2
S100A14	-1.00567	-6.42229	1.3423668665035587e-10	1.8148233209899002e-8	2
YARS	-1.08539	-6.42154	1.3490271530499958e-10	1.8148233209899002e-8	2
ITPRIP	-1.51101	-6.35528	2.080492738014149e-10	2.747020967044608e-8	2
MVD	-1.44946	-6.3426	2.2592254296096983e-10	2.9250833875052236e-8	2
CRTAC1	-2.22975	-6.34002	2.2974006970588011e-10	2.9250833875052236e-8	2
MUC4	2.0029592294136793	6.334114872950702	2.387076234464753e-10	2.985939219602402e-8	2
LY6E	1.066544931196767	6.317564189803495	2.657180846401877e-10	3.266499902559549e-8	2
CDCA7L	-1.06465	-6.30204	2.937501909737358e-10	3.549896375665655e-8	2
C2	-1.33632	-6.28995	3.1757099170143135e-10	3.7738019513853424e-8	2
SUSD4	1.5300705596212139	6.277103479412786	3.4493852531634467e-10	3.985290167834146e-8	2
TKT	-0.910505	-6.27638	3.465469711160127e-10	3.985290167834146e-8	2
AQP5	2.81084731827489	6.27335808586455	3.533429887548953e-10	3.998945253686355e-8	2
CNOT8	-1.0333	-6.26857	3.6437702424399515e-10	4.059387785718258e-8	2
FDPS	-1.2506	-6.25479	3.9806389332833953e-10	4.366454706817017e-8	2
HLA-DQA1	1.537775138452368	6.250975365742591	4.078972177552591e-10	4.4065260039318146e-8	2
TGFB1I1	-1.24069	-6.24037	4.3653899041443033e-10	4.6455567188878924e-8	2
TSPAN4	-1.21586	-6.22875	4.70159365393115e-10	4.929759228313103e-8	2
RNF168	-0.736765	-6.20486	5.474562123696076e-10	5.635094172811157e-8	2
PDLIM4	2.2961073464406168	6.203208385596234	5.532350520291458e-10	5.635094172811157e-8	2
FMO5	-1.92418	-6.17819	6.484128711604218e-10	6.502178239173122e-8	2
PEBP1	-0.799566	-6.17621	6.566014491170615e-10	6.502178239173122e-8	2
THOC2	-0.80788	-6.15991	7.278675619592112e-10	7.109172214752295e-8	2
SLC25A3	-0.827455	-6.15372	7.568569620941736e-10	7.292419107745213e-8	2
SORL1	1.0237683420550843	6.143426525234928	8.076003821352526e-10	7.656314905876366e-8	2
ST6GALNAC1	1.5399051531517967	6.141763921397855	8.161008875828946e-10	7.656314905876366e-8	2
TP53INP1	1.0204277467710088	6.137483584240207	8.383887972743701e-10	7.763262499436699e-8	2
ENO1	-0.945388	-6.1273	8.938304599893843e-10	8.128947092418601e-8	2
TACC2	-1.16302	-6.12608	9.006827774208549e-10	8.128947092418601e-8	2
RBPMS-AS1	-1.49659	-6.10908	1.0020746417037152e-9	8.930990244184362e-8	2
DCXR	-1.15105	-6.10083	1.0552199406864612e-9	9.288540959375888e-8	2
GKN2	-1.95196	-6.07973	1.2038866728789956e-9	1.0467941436130779e-7	2
SBDS	-0.846201	-6.06816	1.2938363829933087e-9	1.1114522181617218e-7	2
CD24	1.7861690921204125	6.065594784523714	1.314662095301161e-9	1.1158977070830092e-7	2
RHOV	2.016738966504586	6.052345092814209	1.4275224903434958e-9	1.1974394536646028e-7	2
ECE1	1.4104665835929662	6.046342495599313	1.4817094344708508e-9	1.228440496253159e-7	2
SLC25A5	-1.12477	-6.04392	1.5040963709181053e-9	1.2326674855915046e-7	2
HMGCR	-1.34834	-6.03447	1.5948961165057894e-9	1.292228330759804e-7	2
POLR2C	-1.02882	-6.00697	1.8902401247228775e-9	1.514315965086979e-7	2
ECH1	-0.800456	-5.99641	2.017315876956505e-9	1.5981624669666533e-7	2
BACE2	1.4033250371762722	5.968311313019759	2.397216540460354e-9	1.8638626790597392e-7	2
BACH1	-0.831189	-5.96778	2.4049841020125666e-9	1.8638626790597392e-7	2
LMTK2	-0.856834	-5.95337	2.6268448332629076e-9	2.0139143721682294e-7	2
CCNYL1	-1.0641	-5.94738	2.724664273276537e-9	2.0572617346599617e-7	2
PPP2R5A	-0.900433	-5.9464	2.741092072828841e-9	2.0572617346599617e-7	2
AFF3	-2.17889	-5.923	3.1611255380306263e-9	2.347794279808163e-7	2
BMP2	-2.43933	-5.91806	3.257707417899042e-9	2.394582875218574e-7	2
PLPP2	1.6524897207557963	5.911260135466136	3.395003743709178e-9	2.4319400292200744e-7	2
MRPL32	-0.89151	-5.90984	3.424312628314108e-9	2.4319400292200744e-7	2
ENAH	1.113385259837193	5.909638711944822	3.4285886412042445e-9	2.4319400292200744e-7	2
STX10	-0.904267	-5.90885	3.4449641367633588e-9	2.4319400292200744e-7	2
CD302	-1.14946	-5.90063	3.621086766118509e-9	2.5312106512181343e-7	2
NPC1	-1.12543	-5.89408	3.767727707225916e-9	2.6081454905359977e-7	2
SSBP3	1.1089135364444822	5.88121631902335	4.072624831504098e-9	2.792097600829252e-7	2
GAS6	1.1536105287246479	5.868769965409887	4.390400691515269e-9	2.981291136238463e-7	2
TGM2	1.7523466195939101	5.840432869364404	5.20653622206581e-9	3.502132383332946e-7	2
PLLP	-1.25779	-5.83635	5.3356383667592536e-9	3.5554300518685495e-7	2
MICA	-1.34621	-5.81838	5.942208855261188e-9	3.9229582535196546e-7	2
SUSD2	-1.43979	-5.81593	6.029767506200216e-9	3.944242414606197e-7	2
HPN	-2.27486	-5.78145	7.405771888446937e-9	4.800286687693332e-7	2
TMC5	0.912098768105791	5.779036590955569	7.512958716169726e-9	4.825891499665778e-7	2
PACS1	1.2731280973130399	5.7741441087843315	7.734522056246986e-9	4.923851987592947e-7	2
HOXD1	-1.98471	-5.76194	8.315380580768378e-9	5.246784384148542e-7	2
NANS	0.8239063038894144	5.759161228042742	8.453293138228712e-9	5.256763538356498e-7	2
LTA4H	-0.749657	-5.75866	8.478650868316932e-9	5.256763538356498e-7	2
SCGB3A1	2.089863215337857	5.752604270054299	8.787903148553298e-9	5.366640676560741e-7	2
SPTBN1	-0.711502	-5.75225	8.806408964342311e-9	5.366640676560741e-7	2
MID1IP1	-1.39484	-5.74512	9.185493805529275e-9	5.5502178672393e-7	2
SHTN1	-0.935874	-5.73922	9.511083987857313e-9	5.698657885161567e-7	2
STYXL1	0.8027656144940931	5.732494136917701	9.896445678763381e-9	5.861876100011692e-7	2
ASRGL1	-2.06775	-5.73161	9.947924377298944e-9	5.861876100011692e-7	2
CFL2	-1.08672	-5.71126	1.1214362654188643e-8	6.477773379681693e-7	2
HSD17B6	-1.5425	-5.71091	1.123760498087352e-8	6.477773379681693e-7	2
MARC1	-1.4101	-5.71048	1.1265692834229031e-8	6.477773379681693e-7	2
PAQR5	-1.7234	-5.70509	1.1628387400103662e-8	6.632832173019129e-7	2
TSPAN8	2.394781785683843	5.699725608741354	1.2000041861332218e-8	6.790499878674502e-7	2
AGPAT2	-1.11566	-5.68031	1.3445305330797741e-8	7.548427323510858e-7	2
ARMT1	-1.11166	-5.67786	1.3639011130639217e-8	7.597355418863877e-7	2
DPYSL3	2.3487828331432428	5.674920423777154	1.3875314072512837e-8	7.669068940853995e-7	2
NPDC1	1.480437735750652	5.6686524204175734	1.439250016625897e-8	7.893732783494343e-7	2
SC5D	-1.09154	-5.66374	1.4810818972613087e-8	8.061155669826817e-7	2
CLIC6	1.237223104804552	5.658250594181488	1.5292373915281554e-8	8.260198940602839e-7	2
SNX9	1.3675431850393345	5.651077315363212	1.5944534951991336e-8	8.547709338924679e-7	2
PTPRN2	1.5483894273977743	5.642864403763932	1.6724406208817363e-8	8.898881811109536e-7	2
WIPI1	0.868927349351699	5.634995511872776	1.7506289633407715e-8	9.245914450829408e-7	2
STX3	-0.973743	-5.63261	1.7750690662071337e-8	9.306060619159459e-7	2
KLK11	1.7178112386988464	5.620036275623443	1.9091736809519342e-8	9.936064485538168e-7	2
KRT15	2.1809034206212345	5.6132935670924455	1.9851139077016426e-8	1.0256421856458486e-6	2
DENND3	-1.62611	-5.61028	2.0199414797497323e-8	1.0361282554399707e-6	2
HMGCS1	-1.45706	-5.5894	2.278541633547887e-8	1.1604287033711738e-6	2
SH2D4A	-0.737868	-5.58223	2.3746069995029894e-8	1.1932458582518354e-6	2
TMEM41B	-1.0151	-5.58209	2.3764503768830384e-8	1.1932458582518354e-6	2
FDFT1	-0.772565	-5.57866	2.4237215435353223e-8	1.2084709514270523e-6	2
NUDT16	-1.14133	-5.57377	2.4928125461387016e-8	1.2342884343033987e-6	2
ACSL1	-1.07521	-5.56809	2.575501844793832e-8	1.2664364243710358e-6	2
TMEM41A	-1.09641	-5.55682	2.7474118382884746e-8	1.3417155073285495e-6	2
LITAF	0.8192319164643447	5.55046890792911	2.8490438064381915e-8	1.3818831523744425e-6	2
USP13	-1.60347	-5.5412	3.003985588826456e-8	1.4405503878931056e-6	2
SYNGR1	1.9733535684486967	5.540158549229363	3.021979199818254e-8	1.4405503878931056e-6	2
MUC5B	3.774918625212013	5.5396590512872645	3.03061091422112e-8	1.4405503878931056e-6	2
SOX4	1.4473462688100325	5.529628363141031	3.209099086967508e-8	1.515289833780022e-6	2
RGS16	-1.47081	-5.52696	3.2582697976772296e-8	1.528385766936753e-6	2
GOLPH3L	0.8421750604800544	5.524123495123942	3.311344989841009e-8	1.5431300508213327e-6	2
ADH5	-0.831599	-5.52142	3.362701422931881e-8	1.5558576399729143e-6	2
MRPL23	-0.864202	-5.5204	3.3822992173324225e-8	1.5558576399729143e-6	2
ST14	0.7900659261154326	5.501053576593479	3.775284587128924e-8	1.7254986606557196e-6	2
SEH1L	-0.747199	-5.49811	3.838827603642698e-8	1.7433656569409194e-6	2
PIP5K1B	-1.26549	-5.48833	4.057425307759394e-8	1.8309773698939544e-6	2
PHGDH	-1.71323	-5.48633	4.1037741449722965e-8	1.8402458901668223e-6	2
AGER	-1.94802	-5.48157	4.2157943405714545e-8	1.8786633530171544e-6	2
PEBP4	-2.24877	-5.4502	5.031220143431135e-8	2.2281117778052168e-6	2
LBH	1.206444037841978	5.43920613477475	5.351850511803658e-8	2.349904379133723e-6	2
H2AFY2	0.9930585153354102	5.43853148745284	5.372151666182284e-8	2.349904379133723e-6	2
COG7	0.74006399447222	5.4293757102584355	5.655152046745193e-8	2.458611834956904e-6	2
VSIG10	-1.49672	-5.41969	5.970171562418557e-8	2.5798377721238973e-6	2
ABCC5	1.1085641282516498	5.410734386844366	6.276681105053033e-8	2.695947968616152e-6	2
MPP1	-1.21285	-5.39443	6.87401998462824e-8	2.934836077269422e-6	2
FAIM	0.8589404760542857	5.389710237846847	7.057137771945468e-8	2.9950828758316184e-6	2
SEC14L1	0.8363629108286647	5.383623349127347	7.300118015242122e-8	3.079872275069605e-6	2
LDHB	-0.873617	-5.38193	7.369195984198712e-8	3.0892127507106398e-6	2
NR2C1	-0.607711	-5.38096	7.408911365659459e-8	3.0892127507106398e-6	2
NFKBIA	-1.39058	-5.37812	7.526945352344566e-8	3.120181416407951e-6	2
FCHO2	-0.996096	-5.37016	7.866633293504663e-8	3.242144241773887e-6	2
G6PD	-0.957942	-5.36091	8.28040884061306e-8	3.3930640823891444e-6	2
CAPN13	1.947423706705193	5.354912474055857	8.559784180745617e-8	3.47565494796179e-6	2
ABCC3	1.141241049377644	5.3544973710940695	8.579456814043129e-8	3.47565494796179e-6	2
AIDA	-0.841871	-5.3483	8.878514515267219e-8	3.5764863555850437e-6	2
RPS6KA2	-1.04873	-5.34497	9.043168436071322e-8	3.6223478061341866e-6	2
NPR1	-2.084	-5.34064	9.26210171258789e-8	3.689317609539199e-6	2
MOAP1	-0.953552	-5.33877	9.358094480508694e-8	3.706845202557055e-6	2
UCP2	1.4469264132489497	5.330546378092683	9.7917722625062e-8	3.857200896777304e-6	2
SERPINF1	1.4512350806040357	5.329351458960523	9.856409572368786e-8	3.861329684120299e-6	2
PVR	-0.909228	-5.31275	1.0798506063377259e-7	4.204660276246021e-6	2
TRIB3	-1.77443	-5.31187	1.0850736196763923e-07	4.204660276246021e-6	2
SHE	-1.40049	-5.30405	1.1326415325981796e-7	4.3255853536016935e-6	2
PER2	1.2030224598585875	5.303765874091369	1.1343778518703587e-7	4.3255853536016935e-6	2
KLF13	-1.00735	-5.30295	1.139461401697708e-7	4.3255853536016935e-6	2
PROM1	2.4082233467473695	5.3026425077216865	1.1413830204406475e-7	4.3255853536016935e-6	2
DNM2	-0.839781	-5.30181	1.146613789383899e-7	4.3255853536016935e-6	2
SHISA5	0.7033750054459353	5.29823683015175	1.1692624725766705e-7	4.369174060388463e-6	2
PLK2	1.486924882981482	5.298055506606557	1.170423906780079e-7	4.369174060388463e-6	2
GTPBP4	-0.673279	-5.29615	1.1827222361019274e-7	4.369785886062412e-6	2
ZNF331	-0.892228	-5.29613	1.1828452678962768e-7	4.369785886062412e-6	2
CCDC12	-0.569851	-5.28826	1.2348333292892476e-7	4.538330741150689e-6	2
WFDC2	1.0816824501514077	5.286267647039029	1.2483720464524412e-7	4.5645603544645665e-6	2
EBP	-0.989347	-5.27835	1.3035560481680951e-7	4.7420176650196525e-6	2
CDH3	1.270622600129446	5.2723142901141	1.3471412475421486e-7	4.862350829764287e-6	2
MRPS15	-0.68482	-5.27189	1.3502741434689043e-7	4.862350829764287e-6	2
ECHDC3	-0.938552	-5.27036	1.3615486734905072e-7	4.878312583913225e-6	2
DUSP10	1.1722905583136436	5.265633415591213	1.397068162394465e-7	4.980547998936267e-6	2
MARC2	-0.888428	-5.25756	1.4597718364981738e-7	5.160825716085363e-6	2
NELFA	0.7987657435852571	5.257267792392602	1.4621133164786019e-7	5.160825716085363e-6	2
SLC25A29	1.0510007348836754	5.248661259791861	1.5320849369062455e-7	5.381165320266764e-6	2
C1orf198	-0.951624	-5.2463	1.5518701555920371e-7	5.423938337927071e-6	2
WEE1	1.1298750332963083	5.24510923226902	1.5618976353862204e-7	5.43235616600183e-6	2
PRSS8	-0.986746	-5.24031	1.603094390211015e-7	5.548574272914824e-6	2
TP53INP2	0.8761818154580662	5.239146701359041	1.6132076399187998e-7	5.556604093053643e-6	2
KCNJ8	-2.14904	-5.23786	1.6244777660130377e-7	5.568522342150461e-6	2
C14orf132	-0.981425	-5.23678	1.6340320758874572e-7	5.574313888316428e-6	2
SFTPB	-1.09602	-5.2359	1.6418035295181628e-7	5.574313888316428e-6	2
DLG5	0.9371274761594918	5.2339019192868115	1.659685443019216e-7	5.608320952003322e-6	2
CDKL5	-1.07886	-5.22502	1.7413868253897432e-7	5.856645313692863e-6	2
ITSN2	-0.751125	-5.20892	1.8993805759979865e-7	6.358020425758519e-6	2
NFIA	0.831903040426059	5.205321434010388	1.9366109263963936e-7	6.4442029044395e-6	2
CSF3R	-2.59268	-5.20469	1.9432028393471145e-7	6.4442029044395e-6	2
SHMT2	-1.12525	-5.19842	2.0099026339296402e-7	6.6345397129251555e-6	2
RAB20	-0.866812	-5.19549	2.0418412453580488e-7	6.654116407185589e-6	2
HNRNPA1	-0.669393	-5.19546	2.0421651082123278e-7	6.654116407185589e-6	2
RND3	1.4921666007405336	5.195306250948467	2.0438309862182943e-7	6.654116407185589e-6	2
ZNF226	0.6600922845960221	5.192947647004987	2.0699040523782837e-7	6.708370860662346e-6	2
ARHGAP29	-0.726195	-5.19008	2.1020049933444132e-7	6.781581720608898e-6	2
ESYT3	-1.66711	-5.18471	2.1634998576234937e-7	6.9485378310159955e-6	2
FBXO32	1.4050426185301461	5.174550903907366	2.2845982032813758e-7	7.304567349505027e-6	2
BTG3	-0.714701	-5.16109	2.4552085859265903e-7	7.787901033004256e-6	2
BANK1	-1.19702	-5.1609	2.4576125279466443e-7	7.787901033004256e-6	2
PFKFB2	-1.24989	-5.15826	2.4925738209504094e-7	7.84754308250758e-6	2
EIF2A	-0.70479	-5.15782	2.498446395132147e-7	7.84754308250758e-6	2
PTPRM	-0.857034	-5.15665	2.5141159125776213e-7	7.862125638894052e-6	2
MFSD13A	-1.35631	-5.15053	2.5975347375525204e-7	8.087520820414615e-6	2
TRADD	0.7455707498860481	5.138351160173661	2.7715959095372275e-7	8.591947319565406e-6	2
OTUD7B	-0.633993	-5.13749	2.7843597973190653e-7	8.594149504279194e-6	2
PDP2	-1.07309	-5.13457	2.8279648857878834e-7	8.691116222270521e-6	2
CA2	-2.23101	-5.12802	2.928115661659587e-7	8.960285265078478e-6	2
LUZP1	0.8448709575799429	5.126009336833541	2.9594793601377374e-7	9.017558905035072e-6	2
MSI2	0.9138312345383769	5.123202656390546	3.0038918941683913e-7	9.113935832093885e-6	2
TRIM22	0.8827806149314218	5.112436821601015	3.180293666147894e-7	9.608260101540036e-6	2
CHST15	1.1339729686839473	5.107949192513008	3.2567418829207404e-7	9.797708702626531e-6	2
PSMG1	-0.637067	-5.09953	3.4050493476527216e-7	1.020084111292601e-5	2
LPL	-1.84661	-5.09762	3.4394964431053836e-7	1.0260924535289282e-5	2
SYT15	-1.74322	-5.09447	3.4972110763685673e-7	1.0389631239378285e-5	2
FASN	-1.67292	-5.08748	3.6284929281502227e-7	1.0726293080238257e-5	2
USP16	-0.475373	-5.08685	3.6406212137695064e-7	1.0726293080238257e-5	2
CHCHD7	-0.951856	-5.08433	3.689353010293938e-7	1.0782907524474888e-5	2
RHOF	-1.13792	-5.0842	3.6918264585153544e-7	1.0782907524474888e-5	2
STAM	-1.02717	-5.08351	3.7052066528700524e-7	1.0782907524474888e-5	2
SLC27A3	-1.10628	-5.08122	3.7502148850290546e-7	1.0869525256202098e-5	2
CX3CL1	1.4198672408828181	5.078278444383456	3.8087023255877e-7	1.099435124754668e-5	2
IQCA1	1.147378851482598	5.072911212051236	3.917753250120323e-7	1.1263540594095928e-5	2
ACAA2	-0.813163	-5.0691	3.99699796057372e-7	1.144521905979543e-5	2
CDKL2	-1.26938	-5.06688	4.0439504397756847e-7	1.1533346654240252e-5	2
IPO9	-0.592255	-5.06312	4.1245804656141416e-7	1.1716437736983597e-5	2
DHCR7	-1.27566	-5.06172	4.1548967422023895e-7	1.1744741389094979e-05	2
RARRES1	1.6550885202408554	5.059941718869611	4.193846464383239e-7	1.1744741389094979e-05	2
MAPK13	-0.801181	-5.05977	4.197544152922105e-7	1.1744741389094979e-05	2
RILP	-1.12937	-5.05964	4.2004334561279377e-7	1.1744741389094979e-05	2
HSPB8	-1.5741	-5.05423	4.321253752095869e-7	1.2035366895485761e-5	2
ATP2A2	0.7231884932618279	5.051652094296602	4.38004958469515e-7	1.215165507349277e-5	2
ZNF385B	-2.55937	-5.04482	4.539501226891717e-7	1.2545210754937188e-5	2
NSMCE1	0.7845770270522487	5.044075594017816	4.5571912081086744e-7	1.2545472321936236e-5	2
ZDHHC13	0.6889300874540693	5.034403215914509	4.793397773998038e-7	1.3144971587925388e-5	2
SH3BP4	1.44107898849242	5.03338118460912	4.819035428211733e-7	1.3164644675536266e-5	2
EVA1C	0.8337524798065064	5.030667230437656	4.887758475840326e-7	1.3301419058298293e-5	2
PIGA	-1.11779	-5.02944	4.9191160422587e-7	1.3335854517606286e-5	2
EIF3M	-0.61196	-5.02338	5.076894923702193e-7	1.3711462426513876e-5	2
FILIP1	-1.05708	-5.02029	5.15943682047421e-7	1.3863838682424184e-5	2
RNF149	-0.431759	-5.01981	5.172203491619682e-7	1.3863838682424184e-5	2
RPSA	-0.63889	-5.01818	5.216211218509936e-7	1.3929432954298069e-5	2
CRIP1	1.4335050932820161	5.0097760477868505	5.449341098881848e-7	1.4497687326502827e-5	2
LTV1	-0.746648	-4.99944	5.749775025662469e-7	1.5240110012257772e-5	2
A4GALT	1.8114892658805035	4.9959628749339915	5.8542923081093e-7	1.545222011764384e-5	2
NDUFA6	-0.623727	-4.99534	5.873143971783283e-7	1.545222011764384e-5	2
VAMP5	1.0518838511831343	4.9917285982850546	5.984130249912737e-7	1.5656443942672822e-5	2
MPC1	-0.632083	-4.99139	5.994683304838262e-7	1.5656443942672822e-5	2
TNFRSF19	1.038151825117701	4.981505473179897	6.309149956670412e-7	1.6417605544182497e-5	2
CLSTN1	0.8869315515103361	4.978689919557674	6.401610735157239e-7	1.659763074242586e-5	2
AKTIP	-0.53418	-4.97792	6.427023495093914e-7	1.660314402899261e-5	2
ERICH2	-1.00604	-4.9729	6.595726262369916e-7	1.6977447021912454e-5	2
SLC39A8	-2.16024	-4.97	6.695265135077283e-7	1.7116306064336866e-5	2
PALLD	1.1078755280555657	4.969930659083381	6.697684981697034e-7	1.7116306064336866e-5	2
CERS2	-0.712228	-4.95958	7.064646517885434e-7	1.798961774018684e-5	2
HLA-A	0.8048262036839732	4.952398997651019	7.330410636914282e-7	1.8554755665949596e-5	2
PYCR1	-1.08389	-4.95214	7.340185026965343e-7	1.8554755665949596e-5	2
USP44	-1.30354	-4.95149	7.364650565867792e-7	1.8554755665949596e-5	2
IFT43	0.76080725259959	4.947225763469809	7.527864956072233e-7	1.8899182090420782e-05	2
B3GNT8	-1.82061	-4.93882	7.859776819302215e-7	1.9663231130394664e-5	2
RETSAT	-0.663315	-4.9317	8.151575656060666e-7	2.032193511458481e-5	2
CNTROB	-0.970755	-4.92848	8.287121407420896e-7	2.0587866074881877e-5	2
SNX1	-0.622835	-4.92483	8.443443780833032e-7	2.090338686018733e-5	2
POLR1D	-0.663092	-4.91962	8.671024928052266e-7	2.1392528628724105e-5	2
LGALS9	1.2669300798113352	4.917515005015535	8.764974035936317e-7	2.1549746509043427e-5	2
PLIN2	-1.68157	-4.90311	9.433065053829066e-7	2.311263018343685e-5	2
RFC1	-0.581805	-4.90166	9.502956893652735e-7	2.3204137894432875e-5	2
NPM1	-0.631893	-4.89677	9.742259938523096e-7	2.3707274184870194e-5	2
SASH1	-0.694837	-4.8917	9.996821086200832e-7	2.4243991273677527e-5	2
DDR1	0.7080774397087127	4.88991135008861	1.0088139964115031e-6	2.438252133699667e-5	2
CPD	0.7955329564324812	4.888497699093383	1.0160838517065194e-6	2.4459784410577597e-5	2
BMPR1B	1.910493173954512	4.887958152212813	1.01887180504089e-6	2.4459784410577597e-5	2
EPDR1	-1.15049	-4.8855	1.031686381943179e-6	2.468430840018412e-5	2
UGCG	1.1812473368869298	4.880736595399101	1.056903306131706e-6	2.5203078838525297e-5	2
HS3ST1	2.3323522984978537	4.866095269085939	1.1382466553488955e-6	2.7052328842125416e-5	2
BNIP3	-0.582824	-4.86411	1.1497029313289314e-6	2.7233826911545783e-5	2
KSR1	1.246625755459752	4.862769248968254	1.157547627773355e-6	2.7328856245112654e-5	2
SERINC2	0.77768871526883665	4.855400606941826	1.2014360529624447e-6	2.8271416031756538e-5	2
SFTA2	-1.90775	-4.85433	1.2079196796289127e-6	2.8330484591296535e-5	2
USP14	-0.595526	-4.85109	1.227855946954277e-6	2.870364885830818e-5	2
SMAGP	-0.99835	-4.84791	1.2476839058822266e-6	2.9071850486732926e-5	2
ASAH1	-0.683047	-4.84276	1.280484146660841e-6	2.97389314843381e-5	2
NR1H2	-0.709869	-4.84121	1.2905025363250125e-6	2.9874295727264087e-5	2
TMEM154	0.8257647263183449	4.8404191245665995	1.295655775537595e-6	2.989652323489661e-5	2
TBC1D4	-1.18235	-4.8371	1.3174584799459424e-6	3.0223285677749294e-5	2
VSTM2L	1.7476954080499512	4.836975787985884	1.3182947890294573e-6	3.0223285677749294e-5	2
IMP3	-0.79057	-4.83532	1.3293278050837524e-6	3.037854887899729e-5	2
TBC1D14	-0.497792	-4.82899	1.3722780956527126e-6	3.125988122045955e-5	2
RPL36A	-0.932655	-4.82036	1.4330287264708183e-6	3.253979241954438e-5	2
TOR4A	-0.985966	-4.81024	1.5074616562115285e-6	3.4121274948533966e-5	2
MPST	-0.708229	-4.80529	1.545271313958801e-6	3.4866406545969145e-5	2
SAMHD1	1.0223401153205152	4.8042913363118025	1.5530056394739647e-6	3.493037920961946e-5	2
LANCL1-AS1	-2.24775	-4.80196	1.5712118839939621e-6	3.5228744443009274e-5	2
BMP1	-1.7939	-4.80056	1.5822589525524794e-6	3.536522361034225e-5	2
IL32	1.0610609678586378	4.795784292025764	1.6203957794444086e-6	3.610444346074573e-5	2
LARP4	-0.504754	-4.79311	1.642155199257505e-6	3.647528526699691e-5	2
SRGAP3	1.7091093527429848	4.79196585389566	1.6515501619047779e-6	3.657003929932008e-5	2
ZFC3H1	-0.463538	-4.78464	1.7129773187476252e-6	3.7812781060899595e-5	2
BOK	-1.15347	-4.78351	1.7226179297245278e-6	3.790822789795026e-5	2
ST8SIA4	1.0863584791264749	4.776375616055019	1.784828670791592e-6	3.915639514690477e-5	2
TNFAIP2	1.424102531632988	4.773126319118079	1.8138794132016287e-6	3.9671657104685924e-5	2
HEBP1	-0.69038	-4.76886	1.8526836242892473e-6	4.0396434988325176e-5	2
CTNNBIP1	-0.896902	-4.76809	1.859801363403029e-6	4.042799914958414e-5	2
DTX2	1.0802955858176513	4.766688453400235	1.8727855695448647e-6	4.0586507935729136e-5	2
CXCL2	-1.39715	-4.76322	1.9052854936464608e-6	4.116571384757353e-5	2
EIF1B	-0.809807	-4.76177	1.9190264876187044e-6	4.133733793571409e-5	2
VIM	1.1159572275640783	4.760780260621622	1.928459290462216e-6	4.1415405846372286e-5	2
DPM2	-0.603955	-4.75973	1.938480177411048e-6	4.1437854149445024e-5	2
FHDC1	-1.23535	-4.75946	1.9411280905911133e-6	4.1437854149445024e-5	2
RHOBTB2	-1.28721	-4.75833	1.9519735758228244e-6	4.1499665206399353e-5	2
SENP5	-0.417629	-4.75795	1.9556644473141913e-6	4.1499665206399353e-5	2
WLS	0.6836671478785371	4.7564254001782915	1.970510091019705e-6	4.169061409190058e-5	2
DAPK2	-1.20017	-4.74755	2.0589875386254614e-6	4.343367204260219e-5	2
CHST9	2.3673401045314604	4.745395212758251	2.0809962228664894e-6	4.364467256840896e-5	2
GSTA1	2.4138192832509513	4.745372219932714	2.081232632995659e-6	4.364467256840896e-5	2
SLC22A23	0.760410391148185	4.74384273011602	2.097016770537791e-6	4.38467142930629e-5	2
TXNRD1	-1.11858	-4.74072	2.12958641689342e-6	4.439751798962013e-5	2
MSMO1	-1.5256	-4.73891	2.148689606173259e-6	4.466518044319341e-5	2
CLDN18	-1.87419	-4.72923	2.2537157339978166e-6	4.67121894866408e-5	2
AC058791.1	-1.12771	-4.72809	2.266430532908729e-6	4.6839564346780404e-5	2
TTN	-2.6732	-4.72417	2.3105799507533764e-6	4.761397412968663e-5	2
SNRPA1	-0.592289	-4.72109	2.345859512006318e-6	4.820166662998573e-5	2
NPTN	0.5221439260234028	4.719129306149531	2.3685623463929353e-6	4.852830324649893e-5	2
TP53BP1	0.6380300702387219	4.718495992304064	2.3759464828578998e-6	4.8540110093916405e-5	2
CEBPA	-1.52104	-4.71734	2.389532463606952e-6	4.867818990147876e-5	2
ADGRG1	1.1501259428978943	4.715170039636108	2.415089744786851e-6	4.89736889541095e-5	2
TNC	1.7787944109127045	4.71470248345989	2.4206418193275586e-6	4.89736889541095e-5	2
TTC39C	1.3171060723558488	4.713553119797191	2.4343422649693353e-6	4.89736889541095e-5	2
STK38	0.7486455541347012	4.713328402590146	2.437029586060361e-6	4.89736889541095e-5	2
MBIP	-1.27695	-4.71322	2.4383814275889025e-6	4.89736889541095e-5	2
IGF2R	-0.623991	-4.68509	2.798305148651991e-6	5.604470705024914e-5	2
THOC6	-0.861336	-4.68441	2.8076356898109474e-6	5.6074068538801274e-5	2
RPL17	-0.774183	-4.68156	2.8469394686182797e-6	5.670021902583334e-5	2
PGM2L1	1.357595090495101	4.675994645534201	2.925322391281723e-6	5.809902130874286e-5	2
PIM1	-1.02089	-4.67482	2.9421256317765654e-6	5.827043265157476e-5	2
SDC2	-0.855532	-4.66385	3.1034695413391037e-6	6.129567265858118e-5	2
BID	0.8613617014935183	4.655830163132451	3.2267785355318655e-6	6.355505789597293e-5	2
VEPH1	-2.07354	-4.65507	3.2386987331757174e-6	6.361411010342387e-5	2
SOCS6	0.6300979623062204	4.644380144692122	3.410989975766322e-6	6.68141717780601e-5	2
HMGB3	1.0719326660036306	4.636425084539243	3.544865889927405e-6	6.924628437036273e-5	2
RAB17	-0.706144	-4.6275	3.70110158999157e-6	7.210069490885216e-5	2
IGFBP7	1.358182853315215	4.625397249860898	3.7388111948940533e-6	7.263684964467193e-5	2
TMEM64	-1.21521	-4.62439	3.757049489154625e-6	7.279283385237086e-5	2
SDHA	-0.483519	-4.62263	3.7890668035666437e-6	7.321421764073216e-5	2
ETV5	-1.38444	-4.62128	3.8138540488418912e-6	7.34939982925478e-5	2
C1orf21	-0.815721	-4.6179	3.87648235322763e-6	7.441487566181268e-5	2
ZFAND1	-0.714257	-4.61757	3.882515251920661e-6	7.441487566181268e-5	2
TRIM2	0.8907604936068534	4.61347386478788	3.959940772379007e-6	7.569538259266037e-5	2
KIF1B	-0.594668	-4.60243	4.175991175969997e-6	7.961181038680769e-5	2
AGR2	1.0149715072673502	4.599542088282548	4.234206422805736e-6	8.050637811894638e-5	2
TIMP1	1.2017011105388096	4.598880038497903	4.247682739799157e-6	8.054781365629786e-5	2
CASC4	0.5268497667263335	4.598104273725096	4.263526071881627e-6	8.063379547086473e-5	2
C1orf167	-1.81937	-4.59652	4.296085288132803e-6	8.103462461478013e-5	2
MAP9	0.6746106702531138	4.595353071520597	4.320171217352755e-6	8.127393345573917e-5	2
SPRYD7	-0.66587	-4.59308	4.36758755376345e-6	8.194973489035104e-5	2
RPS2	-0.870239	-4.5919	4.392255532907268e-6	8.219627808301528e-5	2
RAD9A	0.8004234113143632	4.5854086726132275	4.530992990864267e-6	8.457062833733567e-5	2
PID1	-1.19734	-4.57807	4.69279305523582e-6	8.736191771235352e-5	2
IGSF8	-0.9513	-4.56679	4.952406707213378e-6	9.195484328758173e-5	2
RPP38	0.6753013220757556	4.562455606120649	5.055878620214912e-6	9.345355399820744e-5	2
COBLL1	-0.95041	-4.5618	5.071662057994325e-6	9.345355399820744e-5	2
TARDBP	-0.470822	-4.56177	5.072443954741414e-6	9.345355399820744e-5	2
ESAM	-1.45213	-4.56021	5.110253169763071e-6	9.390748737219251e-5	2
KRT17	2.707755045193247	4.558179256067721	5.159898975899113e-6	9.457604035516884e-5	2
RBM17	-0.389354	-4.55156	5.324841592536356e-6	9.734902706354927e-5	2
TAOK3	-0.839538	-4.54913	5.386765431366353e-6	9.822925198373937e-5	2
SMIM22	0.6789230274765651	4.5475757488982085	5.426739091886086e-6	9.870573909476477e-5	2
GAB2	-1.16999	-4.54689	5.44432954992565e-6	9.877371422638649e-5	2
ZKSCAN1	0.949843768394084	4.5385750468895445	5.663563989093292e-6	1.0249038386354104e-4	2
GLO1	-0.647093	-4.53658	5.717419070206674e-6	1.0320303283689516e-4	2
EIF4B	-0.426142	-4.53086	5.874364903445167e-6	1.0559362717174182e-4	2
ACP1	-0.664377	-4.53068	5.879476856547195e-6	1.0559362717174182e-4	2
BCAT2	-0.876147	-4.52901	5.9259943554449376e-6	1.0616165767417691e-4	2
FAM104B	0.7620583089389467	4.526973220912513	5.983451897390574e-6	1.0692233591076389e-4	2
AKR1B1	0.9199350519802305	4.5224704835558445	6.1122012162288716e-6	1.0894998667927964e-4	2
GLRX2	-0.618316	-4.52168	6.135130901282101e-6	1.090859933320234e-4	2
KANK1	-0.91026	-4.5208	6.160517271051823e-6	1.0926489587711318e-4	2
DESI2	-0.941373	-4.51181	6.427606821727728e-6	1.1371919761518288e-4	2
TIMM10B	-0.668009	-4.50629	6.59701009994822e-6	1.164274307243337e-4	2
SLC2A10	0.8582483700729349	4.505662953627455	6.616603984914427e-6	1.1648490472207372e-4	2
MIF	-0.761323	-4.50482	6.642941991356168e-6	1.1666053300091005e-4	2
HOPX	-1.37475	-4.50337	6.688278057489413e-6	1.1707058134552574e-4	2
TBC1D1	0.6194669563437478	4.5027744504369664	6.707205532423298e-6	1.1707058134552574e-4	2
PLEKHS1	2.5842477951654206	4.502510313863746	6.71554947690323e-6	1.1707058134552574e-4	2
CYBRD1	-1.03621	-4.49561	6.937236933190986e-6	1.2064024227719934e-4	2
KCTD14	-1.19482	-4.4888	7.162523868485012e-6	1.2425497611264752e-4	2
PLS3	-0.919527	-4.481	7.429387435743034e-6	1.2857168062341707e-4	2
EHD2	-0.816681	-4.48048	7.447535195001841e-6	1.2857367055777995e-4	2
PSMA6	-0.581662	-4.47874	7.508496098276518e-6	1.293129883592067e-4	2
IKBKB	0.3508707846885747	4.475240411960676	7.63253810304828e-6	1.3113252210779334e-4	2
CD82	1.1052523310175166	4.474651732961233	7.65359596685669e-6	1.3117821933578895e-4	2
CRACR2B	1.1415068383407887	4.464903262771992	8.010493701559966e-6	1.3684865885408784e-4	2
TALDO1	-0.539506	-4.46432	8.032260641375286e-6	1.3684865885408784e-4	2
RABGGTB	-0.599255	-4.46381	8.051554141809087e-6	1.3684865885408784e-4	2
PEF1	-0.559239	-4.46355	8.061211320998162e-6	1.3684865885408784e-4	2
ATP8A1	-1.13334	-4.46297	8.08322065870509e-6	1.3689634987308147e-4	2
RUNX2	1.13570623254669	4.46154949498352	8.136914706307513e-6	1.3747915131747055e-4	2
C1orf210	-0.803701	-4.46052	8.175982538303485e-6	1.3781266075201854e-4	2
CRYM	0.9651450013886755	4.455534253862554	8.368453232446923e-6	1.4072422534751547e-4	2
SYTL2	1.2086243733180644	4.450043261794141	8.585299344448858e-6	1.4403102194334203e-4	2
MTMR3	0.4822455455986462	4.44218355757077	8.905054083593732e-6	1.4904468454465567e-4	2
BST2	1.1119027875096579	4.44052879317854	8.973809646001871e-6	1.498437067353474e-4	2
SPSB2	-1.13788	-4.4325	9.314472645150193e-6	1.5516866813065629e-4	2
GBP3	0.7404062243246491	4.424133955380041	9.682992805376048e-6	1.6093179184692593e-4	2
TMEM245	-1.00956	-4.42144	9.804675562032921e-6	1.6257520176115052e-4	2
LXN	1.27499114370931	4.415549365385849	1.0075378276772413e-5	1.6667621139997054e-4	2
SIAE	-0.854412	-4.41471	1.0114730878462618e-5	1.6693988695240387e-4	2
CEBPG	-0.708274	-4.41079	1.02993575425653e-5	1.6959450179789974e-4	2
PPA1	-0.575738	-4.40756	1.0454285954587005e-5	1.7143127635199122e-4	2
H1F0	-0.763684	-4.40746	1.045899091348053e-5	1.7143127635199122e-4	2
NUPR1	-0.960919	-4.40672	1.0494710272614436e-5	1.7160168943164704e-4	2
TRAF3IP1	0.9749996199277242	4.406250699980512	1.0517522900649336e-5	1.7160168943164704e-4	2
PGS1	-0.639064	-4.40525	1.0565957551246854e-5	1.7199835009221477e-4	2
ABCB7	-0.572421	-4.40095	1.0777623623497718e-5	1.7504431989872146e-4	2
ADAM28	1.360633608173255	4.400098884603853	1.0820156035597891e-5	1.7533571030412036e-4	2
PPFIA1	-0.439757	-4.3974	1.095537559342309e-5	1.7712432648777016e-4	2
CREG1	-0.59181	-4.39637	1.1007835199717773e-5	1.7756983025789077e-4	2
WWC2	-0.840852	-4.39433	1.1111641262688274e-5	1.7874159588899077e-4	2
FAH	-1.02164	-4.39396	1.1130612703325652e-5	1.7874159588899077e-4	2
FADS2	-1.30151	-4.39288	1.1185656920121416e-5	1.792218737987993e-4	2
KIAA1324L	-1.90203	-4.39127	1.1269235611561474e-5	1.8015616571846033e-4	2
RHOT1	-0.555124	-4.38574	1.155923492630978e-5	1.8400047529287429e-4	2
SLC3A2	-0.725898	-4.38535	1.1579765541752086e-5	1.8400047529287429e-4	2
RRP9	-0.954491	-4.38522	1.158712670497904e-5	1.8400047529287429e-4	2
RAP1A	-0.60754	-4.38457	1.16212718541197e-5	1.841325962663855e-4	2
MAD1L1	-0.67336	-4.38082	1.1823315842383844e-5	1.8691849657693306e-4	2
MACROD2	-1.5499	-4.37903	1.1920930966008533e-5	1.8804477386646205e-4	2
IFFO2	0.7201108943444752	4.376278076812619	1.2072298319488101e-5	1.9001211262240653e-4	2
SLC25A38	-0.588468	-4.37571	1.2103996809668745e-5	1.9009140364083295e-4	2
ACSS2	-1.01835	-4.37376	1.2212722117522815e-5	1.9137738175370916e-4	2
MLXIP	0.4465934750460819	4.368612162784117	1.2503859444920464e-5	1.9550990754886604e-4	2
BPIFB1	2.8433940439369536	4.366062267447195	1.2650643022482294e-5	1.973280956156616e-4	2
PIK3C2A	-0.52317	-4.36563	1.2675493378958348e-5	1.973280956156616e-4	2
EIF3A	-0.497927	-4.35792	1.3130236618236292e-5	2.036003246926056e-4	2
ODF3B	1.028960091743114	4.357474584184591	1.3157177144840632e-5	2.036003246926056e-4	2
PSMD12	-0.588485	-4.35676	1.3199890903969682e-5	2.036003246926056e-4	2
ECHDC1	-0.721845	-4.35625	1.323091903515254e-5	2.036003246926056e-4	2
TP53TG1	0.8976843930064685	4.356181537223582	1.3235102119566917e-5	2.036003246926056e-4	2
SQLE	-0.889969	-4.35578	1.3259157677580991e-5	2.036003246926056e-4	2
APP	0.5361764719182556	4.355468155651766	1.3278282045169931e-5	2.036003246926056e-4	2
PFKP	1.2896951189788801	4.349444709913179	1.364826883782159e-5	2.0857924298584582e-4	2
TMEM128	-0.427361	-4.34923	1.366150160931136e-5	2.0857924298584582e-4	2
MAOA	-0.88587	-4.34487	1.3936077432697605e-5	2.1231673524601264e-4	2
TNFRSF14	0.7894039224453012	4.344388215369636	1.396643391822904e-5	2.1232553056923893e-4	2
GANC	-0.846725	-4.34266	1.4076486698020255e-5	2.1354329820613704e-4	2
DUSP23	0.7303707689964213	4.338343336417083	1.4356076334711487e-5	2.1732234451484693e-4	2
NFATC1	1.0152649615570757	4.33638557101576	1.4484477641582758e-5	2.1880153725526498e-4	2
EPHX1	0.6984662310676214	4.333867882365876	1.4651212239592101e-5	2.2056492118962339e-4	2
DNAJA4	1.648995054758639	4.333689696793305	1.466308171723443e-5	2.2056492118962339e-4	2
PHACTR1	-1.25838	-4.32866	1.500164745440066e-5	2.2518262389447727e-4	2
ADIPOR1	-0.528019	-4.32282	1.540439991691746e-5	2.304802925888783e-4	2
HYAL1	-1.34218	-4.32261	1.541922855047615e-5	2.304802925888783e-4	2
SNX24	-0.879243	-4.32106	1.552834032665153e-5	2.316256621946138e-4	2
NAB2	-1.00989	-4.3164	1.5859467352508593e-5	2.3607098585258095e-4	2
SLC44A4	1.093527609556801	4.314995080325078	1.5960645770708198e-5	2.3667018753015048e-4	2
LBR	-0.450389	-4.31453	1.599460669556896e-5	2.3667018753015048e-4	2
CPB2	-3.07775	-4.31446	1.5999302999934436e-5	2.3667018753015048e-4	2
FBXO38	-0.648851	-4.31204	1.617569721988447e-5	2.387841018173422e-4	2
EGLN2	-0.708604	-4.30667	1.6572883457158646e-5	2.441418575403743e-4	2
C2orf74	1.1494446452565694	4.300869115044386	1.701295292049114e-5	2.501079470579419e-4	2
QPRT	-1.66134	-4.29939	1.7126873252603412e-5	2.511349750111354e-4	2
SOCS5	-0.657438	-4.29905	1.7153258461489895e-5	2.511349750111354e-4	2
PSMA2	-0.594562	-4.29247	1.7669531896816227e-5	2.581634475907781e-4	2
HOMER2	0.7658931946783197	4.2885968635889755	1.7980538314469522e-5	2.621702212314268e-4	2
NUCB2	0.766084713456809	4.2830071069210804	1.8438427977404e-5	2.67877724816892e-4	2
PTPN1	-1.0031	-4.28249	1.8481080012623986e-5	2.67877724816892e-4	2
ATP8B1	0.6044232707564524	4.282449730206263	1.8484690127617232e-5	2.67877724816892e-4	2
GMDS	0.7255132138058026	4.279619875557646	1.8721278272605356e-5	2.70756012340114e-4	2
KRT19	0.8799111508297467	4.276550428771883	1.8981157511708022e-5	2.739588118592676e-4	2
BCAP29	-0.532548	-4.27541	1.907847261196157e-5	2.748070903500727e-4	2
USP25	-0.523314	-4.27434	1.9170473676491288e-5	2.7557555909956224e-4	2
FDXR	0.9764935609102551	4.267802490869933	1.974079882443827e-5	2.832030092922432e-4	2
CIAPIN1	-0.477583	-4.26416	2.0065661235892706e-5	2.8728547110826305e-4	2
EPB41L5	-0.913366	-4.25954	2.048471393793047e-5	2.9269741558606065e-4	2
PHACTR4	0.4300687931424255	4.254915514137953	2.0912796410543734e-5	2.9821647681435364e-4	2
H2AFZ	-0.781835	-4.2523	2.1158364930219574e-5	3.0111605180132845e-4	2
USP3	-0.46324	-4.25024	2.1353845071064914e-5	3.0329266007309333e-4	2
CERS6	1.096039940868714	4.249564869024533	2.1418617684708626e-5	3.0360784113712226e-4	2
MTF1	0.5697192378061932	4.245069408781888	2.185257673127611e-5	3.091445874880926e-4	2
DUOXA1	-0.80676	-4.24188	2.2165502949861387e-5	3.1295056640101327e-4	2
SNX5	-0.390713	-4.22784	2.359435028333493e-5	3.3246584490153767e-4	2
ARHGEF1	-0.857759	-4.22553	2.3837676082296306e-5	3.3523201275497566e-4	2
SSH2	-0.657841	-4.21922	2.4515093221482367e-5	3.4407995013616e-4	2
LGI3	-2.31132	-4.21839	2.4604868004177158e-5	3.446615105496722e-4	2
DPY30	0.46879453103396873	4.2162017647821095	2.4845148773577418e-5	3.473449230502098e-4	2
LURAP1L	-0.93551	-4.21569	2.4901259092765926e-5	3.474480965389844e-4	2
DNALI1	1.0626693981436193	4.211447548189261	2.537394745559963e-5	3.5324440462400217e-4	2
SOX2	1.8060111264545042	4.210869547999578	2.543896194751079e-5	3.5324440462400217e-4	2
FGFR1	-1.09675	-4.21064	2.5465304905573226e-5	3.5324440462400217e-4	2
SMC4	-0.808603	-4.20834	2.5725435540076246e-5	3.561284289623566e-4	2
PARP14	-0.562341	-4.20792	2.5773109304989622e-5	3.561284289623566e-4	2
SLC9A3R1	1.2005110164142647	4.20552251699305	2.6047965219899206e-5	3.592301586419368e-4	2
NOP58	-0.55763	-4.2012	2.6550878858583224e-5	3.65459008227217e-4	2
CCNB1IP1	-0.610719	-4.19852	2.686668583533894e-5	3.690933911482979e-4	2
LACTB	-0.602599	-4.1972	2.7023109791175837e-5	3.7052840925208406e-4	2
HHIP-AS1	-1.81937	-4.1952	2.7263090463821516e-5	3.7232245526888196e-4	2
PIFO	1.3261976606584975	4.194917901895552	2.729704398680441e-5	3.7232245526888196e-4	2
QDPR	-0.801554	-4.19481	2.7310609271476194e-5	3.7232245526888196e-4	2
PLA2G4F	-2.32276	-4.19387	2.7423469538047086e-5	3.731475912333506e-4	2
PTCD3	-0.350732	-4.19252	2.7586986115770224e-5	3.746575447722699e-4	2
TPCN1	0.6695844662052199	4.190786636763384	2.779889817073488e-5	3.768177641774519e-4	2
BDP1	-0.448801	-4.18942	2.7966663384969634e-5	3.783725046201774e-4	2
LAMC1	-0.751261	-4.18891	2.803005899049307e-5	3.7851197083752956e-4	2
RGS12	0.7997579400378695	4.1831357486653165	2.8751559284377203e-5	3.8752101644160577e-4	2
TNFSF10	1.0847371692358931	4.181824684287973	2.8917891870538432e-5	3.889567967030156e-4	2
CCDC50	-0.441132	-4.18144	2.8967189207475638e-5	3.889567967030156e-4	2
TREM1	-1.04355	-4.18099	2.9023806436179082e-5	3.889844734773625e-4	2
TUSC3	0.7959749795617714	4.179328424862473	2.9237120227969305e-5	3.911081936687076e-4	2
XBP1	0.6489744651145563	4.177185185188935	2.9513873374560797e-5	3.940710059187612e-4	2
MTRR	-1.16454	-4.17295	3.0068727427749476e-5	4.0072902160720334e-4	2
ZNF609	0.45765528446986353	4.170893544494777	3.034075856656799e-5	4.036000160067719e-4	2
MVK	-0.651079	-4.16977	3.0490368972635158e-5	4.045059964648742e-4	2
RGS10	0.963058720532984	4.169533822913079	3.052233185106624e-5	4.045059964648742e-4	2
SEC13	-0.490655	-4.16875	3.062742121664081e-5	4.051456647025027e-4	2
CCT8	-0.591841	-4.16762	3.077970185330478e-5	4.064060633593761e-4	2
GCNT2	-0.624558	-4.1671	3.084936424524808e-5	4.065729520676873e-4	2
SLC27A2	1.527512609827972	4.165985155792338	3.1001087475413574e-5	4.0781873376328186e-4	2
LIMK2	0.8190263862135428	4.163932661611728	3.128124063332862e-5	4.1074630886856915e-4	2
SRSF11	-0.421348	-4.16207	3.153811272969554e-5	4.1335798485795815e-4	2
ALDH1A3	1.6036287325160514	4.161116651772918	3.16695256982379e-5	4.1431874904300227e-4	2
FOXN3	0.7522200663629194	4.155560870124218	3.244905373610748e-5	4.237394746125391e-4	2
TNIK	-1.13845	-4.15428	3.263123684272954e-5	4.2533952228274516e-4	2
EIF3L	-0.378137	-4.15101	3.3100927254714104e-5	4.306744732228313e-4	2
PRKCZ	-0.751367	-4.15046	3.318112014316183e-5	4.3093148746947875e-4	2
ICE1	-0.42383	-4.14959	3.330651778812032e-5	4.312896912580566e-4	2
RPS27L	0.7037712004818916	4.149435074433948	3.332968020802092e-5	4.312896912580566e-4	2
MACF1	-0.514771	-4.14745	3.361942726943263e-5	4.340067192484814e-4	2
CISH	-1.15575	-4.14717	3.366139070749091e-5	4.340067192484814e-4	2
ATP1B3	-0.679491	-4.14434	3.407883601612828e-5	4.3788521712164244e-4	2
SH3KBP1	-0.638685	-4.1443	3.4085034432329814e-5	4.3788521712164244e-4	2
DHRS7	-0.715768	-4.143	3.4278853413552845e-5	4.3958313819897804e-4	2
BFAR	-0.754964	-4.14049	3.465633062183692e-5	4.436259198091513e-4	2
JAK1	-0.656169	-4.13724	3.515090471282844e-5	4.491504491083634e-4	2
HSPB11	0.7586564591623881	4.134025555389309	3.56463811871612e-5	4.546667224766715e-4	2
RPS25	-0.55696	-4.13063	3.617758431993165e-5	4.600708249617093e-4	2
SECISBP2	-0.449445	-4.13013	3.6255512137313465e-5	4.600708249617093e-4	2
OXA1L	-0.509572	-4.13004	3.626938075041925e-5	4.600708249617093e-4	2
MTCH1	-0.632201	-4.12967	3.632817313512515e-5	4.600708249617093e-4	2
RUVBL1	0.7095939269566659	4.125989186592921	3.6914461295941975e-5	4.6666686000011753e-4	2
CORO2A	0.6444544982668223	4.124497675683041	3.715447442988307e-5	4.688697392656041e-4	2
EIF3F	-0.492297	-4.11906	3.804149561461394e-5	4.7921530694734527e-4	2
DUOX1	-0.7564	-4.11616	3.852417298036774e-5	4.844397766314321e-4	2
SLC50A1	-0.610368	-4.11522	3.868105718665906e-5	4.84827643916745e-4	2
SLFN5	0.5331975716830959	4.11487890213862	3.8738273545977354e-5	4.84827643916745e-4	2
HTT	-0.411534	-4.11476	3.8759012206528004e-5	4.84827643916745e-4	2
BRAF	-0.633549	-4.11171	3.927321181907053e-5	4.903992999474131e-4	2
ADGRF5	-0.921339	-4.11113	3.937274223710644e-5	4.907826086548408e-4	2
CGNL1	-0.945782	-4.1023	4.090681220378177e-5	5.09014958137808e-4	2
ZRANB2	-0.637394	-4.10126	4.1090932630091036e-5	5.100243495591971e-4	2
SLC25A6	-0.568671	-4.10103	4.113099593219331e-5	5.100243495591971e-4	2
MMAB	-0.657878	-4.09996	4.132170153188951e-5	5.114995345874518e-4	2
PARD6B	-0.927763	-4.09871	4.154663367093592e-5	5.133285593111342e-4	2
ATP9A	0.8290804346817159	4.098334002178477	4.161345123167399e-5	5.133285593111342e-4	2
S100A4	-0.960929	-4.09506	4.2205822020290026e-5	5.1973663385953e-4	2
FUCA2	-0.568693	-4.09411	4.237865354119015e-5	5.209651719804928e-4	2
KCNQ1OT1	-0.558553	-4.09221	4.272814517143065e-5	5.243574441864037e-4	2
PKM	0.5128610452539192	4.091409965626111	4.287584035878654e-5	5.252658793095328e-4	2
SLC38A1	-0.768265	-4.08421	4.422663227158782e-5	5.408848852425749e-4	2
FAM219B	-0.584601	-4.08334	4.439237987947209e-5	5.418300959502187e-4	2
TTC37	-0.535909	-4.08301	4.445590548820167e-5	5.418300959502187e-4	2
TMEM18	-0.436289	-4.08125	4.479500591194544e-5	5.450313859252065e-4	2
DEGS1	-0.820084	-4.07978	4.5078331999357847e-5	5.475443052051472e-4	2
PLXNB2	0.6735126795737436	4.07864429454058	4.529908338698265e-5	5.49289905695895e-4	2
TCF7L2	0.5497494205578125	4.074631331567876	4.60872989586351e-5	5.578941052853131e-4	2
BCL7C	0.6129079648611884	4.074238512965778	4.616515036722787e-5	5.578941052853131e-4	2
WNT7B	0.7343977717495077	4.0711259767188475	4.678643732851806e-5	5.644455129481113e-4	2
DESI1	-0.715571	-4.07039	4.693373882835491e-5	5.652661450104231e-4	2
EFNA5	0.8790852291545402	4.069544329090872	4.7105176717266644e-5	5.656506684877219e-4	2
PSMA1	-0.448256	-4.06945	4.7124333391543733e-5	5.656506684877219e-4	2
TMEM164	-1.07163	-4.06864	4.728872848240562e-5	5.666699732429447e-4	2
DGKD	-0.91244	-4.06769	4.748169587175566e-5	5.678736925165302e-4	2
DRAM1	-1.16937	-4.06736	4.754847046737286e-5	5.678736925165302e-4	2
CCP110	0.7708073564099716	4.065432295069724	4.7943511375432686e-5	5.716341740916974e-4	2
RASSF9	0.8755849944506121	4.060764835325861	4.8912219428030476e-5	5.822105584672075e-4	2
SPPL2B	0.6532341208757967	4.059836362809528	4.9107119073109665e-5	5.835562649854531e-4	2
CLDN10	1.938209064447899	4.058748850179174	4.9336339667349176e-5	5.853046619437598e-4	2
YIPF1	0.4738082547919395	4.058082938902786	4.94771974670435e-5	5.860006942525252e-4	2
SLC25A4	-0.801622	-4.05721	4.9662701853346945e-5	5.870580880825654e-4	2
PAPSS2	-1.02238	-4.05673	4.976492299538662e-5	5.870580880825654e-4	2
ANP32E	-0.676476	-4.0565	4.98134843323916e-5	5.870580880825654e-4	2
LRP6	-0.69145	-4.05498	5.013921383378494e-5	5.899217733248953e-4	2
FZD5	-1.18621	-4.0478	5.170160902111889e-5	6.073022608246749e-4	2
NPNT	-1.26571	-4.04652	5.1984409032933645e-5	6.085632668645144e-4	2
LMCD1	1.0749864346625078	4.046410454686201	5.2009006592729126e-5	6.085632668645144e-4	2
MGAT4A	-0.590055	-4.04616	5.206502002627683e-5	6.085632668645144e-4	2
DYNLL1	0.7285835483606588	4.035385341321803	5.451275595584767e-5	6.361308510068641e-4	2
HHIP	-2.86681	-4.03207	5.5287104615091446e-5	6.441128364470621e-4	2
ARRB1	-0.653851	-4.03026	5.5716215599155506e-5	6.480532091712541e-4	2
SYTL1	0.7980757973889723	4.028138784131837	5.6220154896380634e-5	6.519683212518714e-4	2
CDK4	-0.696415	-4.02807	5.623569671387109e-5	6.519683212518714e-4	2
IMPDH2	-0.565114	-4.02412	5.718851928938684e-5	6.612004886479365e-4	2
SLC48A1	-0.671656	-4.024	5.7217489690852285e-5	6.612004886479365e-4	2
NR0B2	-1.7763	-4.0225	5.758267052673047e-5	6.643437554297545e-4	2
CDC42EP5	1.4624514409054852	4.022015215015353	5.7702329544514755e-5	6.646488039618581e-4	2
STARD4	-0.974395	-4.02149	5.7829957837340847e-5	6.650445151294197e-4	2
TTC9	0.7106410210973775	4.020759150871605	5.8010892502937836e-5	6.653059667544462e-4	2
SCFD1	-0.419755	-4.02064	5.8039314350808626e-5	6.653059667544462e-4	2
RRM2B	0.7038934171069858	4.017808771333482	5.874183642363972e-5	6.71794297476495e-4	2
MAP4	-0.509391	-4.0176	5.879377862907895e-5	6.71794297476495e-4	2
LDLR	-0.757498	-4.01613	5.916270809048857e-5	6.749281738962935e-4	2
UBN2	0.45836076950879795	4.015594366919428	5.929616634171294e-5	6.753700735086474e-4	2
ZNF562	0.44538561560300427	4.014792003228927	5.949824118896888e-5	6.765908447804595e-4	2
SYNPO	0.6945775236482905	4.012592154918864	6.005562195464308e-5	6.818416951219827e-4	2
M6PR	-0.450008	-4.01153	6.032543655042801e-5	6.838161567639932e-4	2
GGNBP2	-0.388789	-4.01017	6.0675363158222384e-5	6.861057404960333e-4	2
IFRD2	-0.656001	-4.01	6.071987689382847e-5	6.861057404960333e-4	2
MARCKS	1.230004915288607	4.008418628513235	6.11266933639531e-5	6.896096893749771e-4	2
FOSB	0.8807798325461258	4.007531151971797	6.135677062016654e-5	6.902907930309119e-4	2
STX12	-0.836181	-4.00744	6.138069604229987e-5	6.902907930309119e-4	2
RHOC	0.5832378018376799	4.006885189201353	6.152475103565858e-5	6.908212202901506e-4	2
TCEA1	-0.395145	-4.00409	6.225716279739526e-5	6.979458659519311e-4	2
USP32	-0.558626	-4.00248	6.268256895801443e-5	7.016118001108994e-4	2
GPC1	0.9250682361743414	4.000212500447749	6.328562986721156e-5	7.072516315881167e-4	2
USP12	-0.611311	-3.99895	6.362483335513036e-5	7.099296742129569e-4	2
SCD	-1.39902	-3.99804	6.386834769479386e-5	7.115333110373129e-4	2
PLXNB1	0.634125832589829	3.9938333049420685	6.50135790647983e-5	7.231619637004867e-4	2
SLCO4C1	-1.4451	-3.99055	6.591999269844576e-5	7.321020995948882e-4	2
TCF4	1.2467636315321582	3.988997587409128	6.635309641727912e-5	7.333733523909883e-4	2
LPIN1	-0.588081	-3.98898	6.63577828240051e-5	7.333733523909883e-4	2
CLCC1	-0.465089	-3.98883	6.640026962679119e-5	7.333733523909883e-4	2
MAN1A1	-0.833966	-3.98867	6.644588858970245e-5	7.333733523909883e-4	2
CHPT1	-0.770672	-3.98766	6.672932737931417e-5	7.353633759111438e-4	2
MED26	-0.58828	-3.98634	6.710044029814409e-5	7.381681986623989e-4	2
YOD1	-0.880004	-3.98602	6.719090616155637e-5	7.381681986623989e-4	2
MEGF6	-1.00393	-3.98508	6.745643417487533e-5	7.399451933336325e-4	2
DYNC1H1	-0.443168	-3.98238	6.822998176269522e-5	7.472807526390428e-4	2
CYBA	0.9267658921526953	3.9809970412292928	6.862680361494156e-5	7.504740947462167e-4	2
TP53BP2	-0.675896	-3.97982	6.89671839090765e-5	7.528551524717202e-4	2
P3H2	-2.02506	-3.97952	6.905571805280575e-5	7.528551524717202e-4	2
CERS4	0.7779732439816768	3.9775478874745764	6.962960304549447e-5	7.579527781898863e-4	2
SGPL1	0.5609696619665173	3.976538680386156	6.992562930192389e-5	7.60014842869996e-4	2
ZFAND6	-0.490574	-3.97585	7.01276992133989e-5	7.610509823311023e-4	2
FOXK2	-0.424194	-3.96938	7.205890539372278e-5	7.808206617891238e-4	2
ZNF277	-0.649746	-3.96793	7.250088751064303e-5	7.844177965870787e-4	2
MAPK14	-0.374078	-3.96478	7.346258826488748e-5	7.936185671646177e-4	2
CCSER2	-0.557968	-3.96389	7.37382288519282e-5	7.950814853003068e-4	2
TGFBR2	-0.695769	-3.96362	7.382102991147308e-5	7.950814853003068e-4	2
NCK2	0.5179018649864721	3.9619140326537625	7.43513130356284e-5	7.995850104736509e-4	2
CAT	-0.786064	-3.95949	7.510876952296556e-5	8.053415491622444e-4	2
ZNF330	-0.636273	-3.95948	7.511250072831593e-5	8.053415491622444e-4	2
ABCA3	-2.01132	-3.95902	7.525678147387739e-5	8.056769548179366e-4	2
HSD17B4	-0.678194	-3.95753	7.573024640423002e-5	8.095302201831486e-4	2
EGFL7	-1.09287	-3.95326	7.709423849888329e-5	8.228771264925716e-4	2
COLEC12	-1.52244	-3.95286	7.722171752674157e-5	8.230057488276044e-4	2
TPBG	0.5889497226183615	3.9521146113676293	7.746362153598696e-5	8.243516739575926e-4	2
S100A13	0.5879095902698487	3.951623152097348	7.762290880767373e-5	8.248157075986791e-4	2
SPRY4	-1.4447	-3.95093	7.784852936011602e-5	8.259821641928976e-4	2
H1FX	-1.01765	-3.94917	7.842300246992288e-5	8.308410217095841e-4	2
DTX4	0.9546620922337554	3.948572145835219	7.86187229233969e-5	8.316787751391987e-4	2
RAP1GDS1	-0.562633	-3.94782	7.886476612657776e-5	8.33045603677777e-4	2
EREG	1.757358970091704	3.9459364683199856	7.948869003991791e-5	8.383940236458798e-4	2
POGK	-0.690046	-3.9446	7.993476566935597e-5	8.41830241182269e-4	2
NRGN	-1.91228	-3.94425	8.005061760470945e-5	8.41830241182269e-4	2
PEPD	-0.400666	-3.94214	8.075763814098772e-5	8.480146685496944e-4	2
TXNIP	-0.973828	-3.93832	8.205363629281464e-5	8.601053954746089e-4	2
SLC39A6	0.572617373649797	3.9380387821617604	8.21503189787109e-5	8.601053954746089e-4	2
GOLIM4	-0.666329	-3.93562	8.298293043471414e-5	8.675488181811024e-4	2
LPIN2	-0.746733	-3.93388	8.358451160231732e-5	8.725586643111603e-4	2
UXS1	-0.583927	-3.93186	8.429115089577734e-5	8.78648985214755e-4	2
HAGLR	-1.67958	-3.92152	8.799061786469813e-5	9.158731465332813e-4	2
SLC26A9	-1.82078	-3.92072	8.828538307856634e-5	9.171079125682302e-4	2
NUP58	-0.941524	-3.9205	8.836649872852372e-5	9.171079125682302e-4	2
SLC39A4	-0.694799	-3.91351	9.096241218588788e-5	9.425701466095059e-4	2
KIAA1671	0.48183412815565907	3.9131914367347593	9.108426802439685e-5	9.425701466095059e-4	2
PQBP1	-0.549059	-3.90915	9.26210481250705e-5	9.570841639590619e-4	2
SCCPDH	0.47933285164878336	3.901961561185198	9.541631226829603e-5	9.845416880939952e-4	2
PPP2R3A	-0.646409	-3.89857	9.676160697605033e-5	9.969801412416748e-4	2
SCIN	-0.700811	-3.89733	9.72577793586619e-5	9.997334448723209e-4	2
PGAP2	0.5806330798181525	3.897204967538702	9.730925816849799e-5	9.997334448723209e-4	2
CTSB	0.6455388687783371	3.8958155086970736	9.786886736520867e-5	0.0010040360062071047	2
AEBP2	0.5411206669568689	3.895433087023198	9.802342136303891e-5	0.0010041767159748095	2
PDLIM1	0.6314869414615617	3.8946801879405504	9.832837579281922e-5	0.001005855551510475	2
FBP1	-0.743656	-3.89384	9.867155726655135e-5	0.0010079200620494429	2
GBE1	-0.611196	-3.89204	9.940394688128064e-5	0.0010139486999478269	2
PEG10	-1.16145	-3.88921	1.0057168235067847e-4	0.001024394421657625	2
APOL1	0.741862154740293	3.88659517228724	1.016600804444382e-4	0.0010332960084454045	2
MGLL	-0.659782	-3.8861	1.0186550421032773e-4	0.0010332960084454045	2
RFK	0.6642183091627601	3.8860694339200097	1.0188037783129303e-4	0.0010332960084454045	2
AKR1C3	0.8458429754813525	3.8831427328250534	1.0311499708527062e-4	0.0010443322858209936	2
MYADM	0.8952756226334112	3.8810078534979833	1.0402448136227092e-4	0.001050895396048637	2
WNK2	1.6732564255869484	3.880929966212032	1.0405780499443728e-4	0.001050895396048637	2
NR1D1	-1.21	-3.87914	1.0482672413412829e-4	0.0010571634272649713	2
SPATA18	1.3284994716368614	3.8783047187367417	1.0518691279888635e-4	0.0010592975822825703	2
PRKAB1	-0.558306	-3.87571	1.0631436913038935e-4	0.0010687305003953369	2
BRI3	-0.565265	-3.87546	1.0642337381215837e-4	0.0010687305003953369	2
IL13RA1	0.5347609755914924	3.8665543979583394	1.1038385097025287e-4	0.001106943540672156	2
PNN	-0.52926	-3.86476	1.1119747484972138e-4	0.001113536510784429	2
GALNT12	0.6687548389880359	3.8615614090915726	1.1266468540886587e-4	0.0011266468540886588	2
PDCD5	-0.534169	-3.86007	1.1335350178671005e-4	0.0011319474338084632	2
RBKS	0.7649583750858758	3.8588856409955827	1.1390521914525232e-4	0.0011351249389794187	2
TFPI	-1.02722	-3.8587	1.1399010607423053e-4	0.0011351249389794187	2
TSPAN1	1.4529322102763962	3.856174659836194	1.1517520957781773e-4	0.0011453267005437104	2
MRPS31	0.65025981153055	3.8552789775859364	1.1559772901810874e-4	0.0011479273090516926	2
ANKRD36C	1.1570069851852	3.85105113817333	1.1761193455449494e-4	0.0011663047195737816	2
TMEM98	0.699278956624701	3.84793165422978	1.191192724472502e-4	0.001179611684095686	2
IFT52	0.7018573191589708	3.8465526484617976	1.1979139923492208e-4	0.001184622297565873	2
PITRM1	-0.497361	-3.8456	1.2025542738387453e-4	0.0011874336775857166	2
EIF4EBP1	-0.787403	-3.84529	1.2040877263597098e-4	0.0011874336775857166	2
TGS1	-0.469149	-3.83898	1.2354681982254566e-4	0.0012166972725618102	2
SLC2A3	-1.09049	-3.83715	1.2447157627745584e-4	0.0012214695610281384	2
GLT8D1	0.556463517511048	3.837120543820675	1.2448537517897054e-4	0.0012214695610281384	2
FAM177A1	-0.534828	-3.83654	1.2478116098322444e-4	0.0012214695610281384	2
PTPRU	0.48983153619170816	3.836362009127166	1.248703049794889e-4	0.0012214695610281384	2
TM7SF3	0.5493421078884221	3.8363272285759957	1.2488798176571008e-4	0.0012214695610281384	2
MID1	0.7432496949540082	3.831249185087468	1.2749430025163066e-4	0.00124525254903305	2
TLR5	0.989668815493702	3.829679441409567	1.2831029223049409e-4	0.0012515080487050928	2
CCDC146	1.405203588960694	3.8284757761382653	1.2893931890110098e-4	0.00125592533301209	2
AK3	0.39859351798389386	3.8280382535433075	1.2916868433193374e-4	0.0012564430003911154	2
ACTR1A	-0.396752	-3.82653	1.2996141676643985e-4	0.0012624317459737277	2
CEP170	-0.636273	-3.82592	1.302854380787817e-4	0.0012638573789138959	2
ARRB2	-0.560639	-3.82555	1.3047863172261582e-4	0.0012640117448128407	2
RHOB	0.7366680614560547	3.823939943744286	1.3133591860033493e-4	0.0012705903658349906	2
IFT27	0.8993671352540002	3.821361008242794	1.3271720616956037e-4	0.0012822136585216334	2
ZNF428	0.6282005290987754	3.8128353595130307	1.373816325752337e-4	0.0013254817865513075	2
TMEM123	0.6154943669157192	3.811503735214104	1.3812396811487853e-4	0.0013308430981879512	2
PRDX6	-0.523912	-3.811	1.384033366518776e-4	0.0013317352096192813	2
AARS	-0.713357	-3.80627	1.4108063036008664e-4	0.0013543355604941408	2
DENR	0.3668325870360571	3.8061759052452366	1.4113202264335857e-4	0.0013543355604941408	2
MRPL14	-0.758493	-3.80574	1.4138069751496596e-4	0.0013548983511850906	2
PRPF40A	-0.311456	-3.80442	1.4213856439249887e-4	0.0013603328377429758	2
FEM1C	-0.761382	-3.80344	1.4269903856412266e-4	0.001363866146061923	2
CCDC34	1.4033476683465103	3.801790524079129	1.4365416105712887e-4	0.0013711568518572006	2
PLXND1	-0.833295	-3.8011	1.4405378946287327e-4	0.001372696156488342	2
SNU13	-0.383199	-3.80085	1.442004798330671e-4	0.001372696156488342	2
XPOT	-0.681118	-3.79921	1.4515990870217946e-4	0.001379986865395386	2
ADAMTS1	-0.904229	-3.7978	1.4598525643064091e-4	0.0013845167396855649	2
SPAG9	-0.746791	-3.79773	1.460247669345785e-4	0.0013845167396855649	2
CNBP	-0.467028	-3.79456	1.479027171447258e-4	0.0013994512467299912	2
RRP8	-0.429835	-3.79441	1.4799246003287703e-4	0.0013994512467299912	2
RBL2	-0.521876	-3.79365	1.484505560603636e-4	0.0014019237943184008	2
PRSS23	1.3382218214583317	3.7919270638609697	1.4948282031628665e-4	0.001409804905893021	2
MSN	-0.884042	-3.78812	1.5178951443163037e-4	0.0014296687422688567	2
MGST3	-0.542343	-3.78644	1.5282191292578153e-4	0.0014370583039852813	2
CD44	-0.740236	-3.78619	1.5297717429520736e-4	0.0014370583039852813	2
AKAP13	-0.815624	-3.7846	1.539533932016274e-4	0.0014443259125363202	2
RAD1	-0.609595	-3.78365	1.5454277997346288e-4	0.0014479500935752829	2
HSBP1	0.5200744970029896	3.780526427931803	1.5649710540178308e-4	0.0014643364324340071	2
CCDC153	1.432424233482624	3.7791961299663486	1.5733546530944192e-4	0.001470251464818245	2
GALE	-0.718494	-3.77716	1.586262830529213e-4	0.00148037355781064	2
ODF2L	0.6971062936646591	3.7745201702896556	1.6031593734076196e-4	0.0014941864486792587	2
EPRS	-0.521951	-3.77088	1.6267573670238392e-4	0.001514201047895558	2
IGFBP4	0.6230400267723376	3.768384872250633	1.643072344322637e-4	0.0015255918697672057	2
CCT6A	-0.441842	-3.76835	1.6432742720634138e-4	0.0015255918697672057	2
CNPPD1	-0.592964	-3.76697	1.6523876851278654e-4	0.0015320577626738204	2
MNAT1	0.49536007507192487	3.764743460080067	1.6672016006926966e-4	0.0015423927508071208	2
SPRY2	-0.835172	-3.76464	1.6678608848138713e-4	0.0015423927508071208	2
GARS	-0.645444	-3.76304	1.6785839315866885e-4	0.0015502983720483278	2
C11orf54	-0.601452	-3.76124	1.6907208627867315e-4	0.0015589854797677589	2
CTSS	0.5438602593098578	3.7609987261930113	1.692362919130779e-4	0.0015589854797677589	2
EMC3	-0.362506	-3.75978	1.7006457422985338e-4	0.001564594082914651	2
ANP32B	-0.332013	-3.75945	1.7028619737349308e-4	0.0015646141588569662	2
RNF128	-0.704631	-3.75869	1.7080675091290734e-4	0.0015673575740943666	2
CCNO	1.6473074612238934	3.758369158662952	1.7102443094606131e-4	0.0015673575740943666	2
GGT6	0.8892800576325082	3.7572210559051094	1.7181071545374898e-4	0.0015725422351543393	2
LRRC4	1.0884168781231804	3.756345141684979	1.7241287526890855e-4	0.0015735578227915738	2
MS4A8	2.12086192562159	3.756123112222861	1.7256582764878792e-4	0.0015735578227915738	2
C11orf96	-2.02361	-3.75582	1.7277463439581403e-4	0.0015735578227915738	2
RAD51C	0.5181425469320566	3.755762378163103	1.7281460344029226e-4	0.0015735578227915738	2
MYSM1	-0.373477	-3.75532	1.731230140672474e-4	0.0015735578227915738	2
GOLGA4	-0.418717	-3.75514	1.7324584724984367e-4	0.0015735578227915738	2
GGTLC1	-1.68232	-3.75418	1.7391260029936463e-4	0.0015776041223084859	2
ASPH	-0.561961	-3.75348	1.7439617397727185e-4	0.0015795895672175808	2
EIF5A	-0.718217	-3.75322	1.7457455525490235e-4	0.0015795895672175808	2
ANKRD29	-1.27718	-3.75271	1.7493509703342327e-4	0.0015808456804161063	2
ATP2C1	-0.53031	-3.75114	1.7603221638698563e-4	0.0015882992725563423	2
TOR1AIP2	-0.534839	-3.75089	1.7620543121908369e-4	0.0015882992725563423	2
AK1	-0.824894	-3.75054	1.7645135491737578e-4	0.0015885077784859715	2
TCTEX1D2	1.036722676527159	3.7500860423951696	1.767739038354404e-4	0.001589404709138323	2
IP6K2	0.328238342117857	3.7489913658815452	1.775471972137783e-4	0.0015943469976501753	2
HLF	-1.0623	-3.74637	1.794107454999329e-4	0.001609054862156631	2
UBTD1	-0.55898	-3.74473	1.8058502178779694e-4	0.0016159257663074975	2
USP15	-0.433316	-3.7446	1.80683037381285e-4	0.0016159257663074975	2
DDT	-0.495503	-3.74436	1.808567687957059e-4	0.0016159257663074975	2
TMEM43	-0.597276	-3.74306	1.8179150259000238e-4	0.0016222445725490827	2
SLC25A16	-0.546039	-3.74182	1.8269473078731964e-4	0.0016277456729555536	2
CCDC80	1.8408530563255725	3.7415832839051633	1.8286455596597451e-4	0.0016277456729555536	2
PIGS	-0.414222	-3.74041	1.8372031299341028e-4	0.0016333239796047572	2
FLNA	-0.754795	-3.73572	1.871762192085521e-4	0.0016596479734654083	2
UBE2Z	0.45100328870602996	3.7355903677835807	1.8727531038084975e-4	0.0016596479734654083	2
DLGAP1-AS1	0.5988981943220357	3.735450267439787	1.873796099073848e-4	0.0016596479734654083	2
CELSR1	0.7608022280240472	3.7333532630940622	1.8894729152354623e-4	0.0016714568096313706	2
FTO	0.7608682726485491	3.7324278637672745	1.8964301602976603e-4	0.0016755324712419228	2
OSBPL6	0.951398056428096	3.7291867291910346	1.9209876424217058e-4	0.001695128946839946	2
GHITM	-0.444563	-3.7284	1.9269622086948954e-4	0.0016977700218401138	2
WDR33	-0.406383	-3.72817	1.9287429420624015e-4	0.0016977700218401138	2
PTPN11	-0.547105	-3.72781	1.9315443666999255e-4	0.001698139498713991	2
PLEKHA5	0.6200300621748649	3.726210197184956	1.9438032473861858e-4	0.001706812457372353	2
TMEM176B	1.3497912149689542	3.7243847080487034	1.95792163767243e-4	0.0017170948679710242	2
IGFBP2	1.575405512657608	3.721145865888026	1.9832083703227518e-4	0.0017368644692595295	2
NARS	-0.392952	-3.72088	1.9853359641606124e-4	0.0017368644692595295	2
PTPRG	-0.98398	-3.71798	2.0082271383421995e-4	0.0017547376833798875	2
NDRG2	0.9286597102675057	3.717160102109815	2.0147477530813956e-4	0.001758280474843372	2
CPNE3	-0.457714	-3.71629	2.0217309394317357e-4	0.0017622177992846304	2
RBM38	1.0586759538422206	3.714150803956052	2.0388718933164014e-4	0.001774988595768735	2
EEA1	-0.355179	-3.71312	2.0471663235270164e-4	0.0017800360837497105	2
XRN2	-0.428641	-3.71192	2.0569571984331336e-4	0.0017863708678231718	2
AKR1C1	0.8126968727385262	3.711490206520309	2.0604264110821903e-4	0.0017872068504885665	2
C12orf75	1.443253208195214	3.7086744397946005	2.0834710327723838e-4	0.0018049998133252852	2
MAN2B2	0.5380763740450254	3.7061294603897648	2.1045075618525885e-4	0.001820769426921725	2
ATP2B4	-0.772256	-3.70586	2.1067808937032581e-4	0.001820769426921725	2
RAD21	-0.590554	-3.70504	2.1135523999375036e-4	0.0018244102435295885	2
HNRNPA2B1	-0.428747	-3.70447	2.1183574931374176e-4	0.0018263469076263345	2
FAM126B	-0.479732	-3.70249	2.134927028454486e-4	0.0018384093856135852	2
CKS2	-0.960406	-3.69859	2.1679685825474917e-4	0.0018617482146777622	2
CLDN1	1.1860830009096142	3.6984988867014907	2.1687830121278062e-4	0.0018617482146777622	2
SCPEP1	0.7172088678465867	3.6983724236662963	2.1698636274855825e-4	0.0018617482146777622	2
MORN2	1.1886755024783113	3.696724110491328	2.1839946323092845e-4	0.0018690993199517961	2
DLC1	-1.27752	-3.69653	2.1856843929439186e-4	0.0018690993199517961	2
MT-ATP6	1.0593791416950804	3.6964566507906023	2.186295698232536e-4	0.0018690993199517961	2
C12orf49	-0.765214	-3.69587	2.1913303655308954e-4	0.001871159940866501	2
ARPC5	-0.482526	-3.69229	2.222444351425484e-4	0.001895457921730108	2
SNX27	-0.519151	-3.69192	2.2256402479538527e-4	0.001895828559092501	2
NAE1	-0.40341	-3.69163	2.2281968198029675e-4	0.001895828559092501	2
VMP1	0.6838215646111908	3.690991016582788	2.2338202777656558e-4	0.0018983478641798719	2
SLC22A3	-1.23286	-3.68481	2.2887180294800966e-4	0.0019426856607372724	2
HES4	0.9988012260337176	3.684280520171562	2.2934954946559819e-4	0.0019434235845462266	2
VPS13D	-0.42574	-3.68411	2.2950387912874093e-4	0.0019434235845462266	2
SVIL	-0.61783	-3.6808	2.3250390318774278e-4	0.001962610057081404	2
ACVR1	0.5777151503588419	3.680791307773204	2.3251125293933863e-4	0.001962610057081404	2
STARD7	-0.519367	-3.6807	2.3259544154751564e-4	0.001962610057081404	2
CCDC141	-2.16392	-3.67883	2.343093707365767e-4	0.0019737352221464444	2
PBXIP1	0.5854194424381578	3.6786545814923977	2.344675642577894e-4	0.0019737352221464444	2
LDOC1	0.681204606953044	3.6766910658780336	2.362788986133632e-4	0.0019866374376335846	2
NCOR1	-0.271903	-3.67591	2.3700497049959938e-4	0.0019890016112795545	2
RUNDC1	0.6645274997603812	3.6757862445843075	2.371180041497365e-4	0.0019890016112795545	2
ZC3H15	-0.393085	-3.67005	2.4250180318533912e-4	0.0020317718645258146	2
KIAA1109	-0.505189	-3.66954	2.4298613333456176e-4	0.002033440294219983	2
TMEM167B	-0.388218	-3.66686	2.455471055011727e-4	0.002051573969166996	2
SAR1A	-0.509178	-3.66667	2.4572849504468647e-4	0.002051573969166996	2
GPHN	-0.735419	-3.66376	2.485392396964955e-4	0.0020726137766503075	2
SOX9	1.2959589162903336	3.661036923623515	2.511965505713473e-4	0.002092326408380498	2
MCUR1	-0.521435	-3.66036	2.518613124598681e-4	0.002095415586743127	2
SSBP4	0.9258730793948096	3.6594163355262532	2.527903566236933e-4	0.0021006937560919966	2
SLC2A1	1.3468187577347914	3.6571963842799873	2.5498901862069045e-4	0.002116421764763032	2
CFLAR	-0.465415	-3.65691	2.552766784987668e-4	0.002116421764763032	2
HACD2	-0.583302	-3.65564	2.56540914614797e-4	0.002124432893383859	2
TPI1	-0.542766	-3.65348	2.587082277581553e-4	0.0021398952017582912	2
ALDH18A1	0.4674875302627267	3.65252158495041	2.596777606296283e-4	0.0021454257627917146	2
SLC26A2	1.0153986556317507	3.6503517966051455	2.618813796505311e-4	0.0021611275890142207	2
ASXL2	0.36950845989619174	3.6483853198366574	2.638936507277541e-4	0.002175215872472701	2
TTC39A	-0.701797	-3.64734	2.649717330682532e-4	0.0021815802041300755	2
WAPL	-0.347472	-3.64697	2.653555386168852e-4	0.002182220288740936	2
KIF9	0.7920447276052224	3.6434729578241054	2.6898392407240473e-4	0.0022095108048804674	2
LINC-PINT	-0.479758	-3.64307	2.6940923484579447e-4	0.002210457818700247	2
PSAT1	-1.49544	-3.64195	2.7058209945003507e-4	0.0022175291598606323	2
RAD23A	-0.51633	-3.64099	2.715928680268548e-4	0.002223257346764035	2
HEBP2	0.6255096164043175	3.640201257348971	2.724250217377569e-4	0.0022275119323282187	2
USP53	-0.513008	-3.63897	2.7372562362658863e-4	0.00223558269926412	2
PLIN5	-0.698636	-3.63824	2.745073695981268e-4	0.002236723698375821	2
IQCK	1.0617122074001042	3.6380279083654354	2.7473366068507017e-4	0.002236723698375821	2
TPPP3	1.1507272003837963	3.6379596671102155	2.748064459715595e-4	0.002236723698375821	2
POLE3	-0.530622	-3.6367	2.761558899499411e-4	0.0022451442364231243	2
BNIP3L	-0.515997	-3.63569	2.7723736267080707e-4	0.0022513694713472143	2
HCAR2	1.456402970952201	3.6347612097467725	2.782382261776537e-4	0.0022569266810542332	2
RMDN2	-0.845012	-3.63019	2.832163064175394e-4	0.0022941982876309806	2
FNIP1	-0.427879	-3.62995	2.8347667481106505e-4	0.0022941982876309806	2
ADIPOR2	-0.501593	-3.6296	2.838643835104782e-4	0.002294731354228696	2
RANGRF	-0.738633	-3.62844	2.8513951352265973e-4	0.002302428914401545	2
PMEPA1	0.5692313822891811	3.627664579641675	2.859964699602259e-4	0.0023067362339552156	2
INPP5K	-0.562445	-3.62382	2.9027958253183706e-4	0.0023386366366689245	2
CYCS	-0.533843	-3.62189	2.9245850457244567e-4	0.0023518265583887706	2
AGAP1	0.492298034421172	3.6217856899100824	2.9257645964808404e-4	0.0023518265583887706	2
EIF1	-0.476828	-3.61808	2.9679709051432543e-4	0.00238306672901705	2
HIBADH	0.7004984758441041	3.6173915742911045	2.9758692610407843e-4	0.002386720790913475	2
RASSF5	-0.612035	-3.61268	3.0304863638693907e-4	0.0024277941319537926	2
PRKD2	0.5701130548479667	3.61176367217346	3.0412165524515997e-4	0.002433655894386073	2
PDLIM5	0.6943496081084067	3.6100224357355035	3.061705214739077e-4	0.002446770713327551	2
PDLIM2	-0.715959	-3.60979	3.064468789623427e-4	0.002446770713327551	2
U2SURP	-0.335381	-3.60627	3.1063081942670623e-4	0.002477402396546326	2
DCTN4	-0.455957	-3.60425	3.130527681762823e-4	0.002493928756532841	2
ATP6V1B2	-0.459668	-3.60386	3.1353183083058194e-4	0.0024949575377478227	2
NAPSA	-1.43564	-3.6027	3.149310833286409e-4	0.002501771225411769	2
PIGT	0.5415742523727866	3.6023138113604025	3.153972923064222e-4	0.002501771225411769	2
PKP4	0.5071336821140521	3.602278031146712	3.154407197258317e-4	0.002501771225411769	2
RPL15	-0.600203	-3.60151	3.1637429258476053e-4	0.002505505334264973	2
SLC30A1	1.0791237340248057	3.6013128105782215	3.1661434869182894e-4	0.002505505334264973	2
SLC25A24	-0.530397	-3.59996	3.1826907591908275e-4	0.0025158076621985145	2
HIPK2	0.5011099789156609	3.595774622522114	3.2342772741888554e-4	0.002553753816718332	2
ERN1	-0.710229	-3.59514	3.242120505416363e-4	0.0025556469369191633	2
OPTN	0.6036802694317085	3.595005793013335	3.243843587534141e-4	0.0025556469369191633	2
RABAC1	-0.540083	-3.59441	3.251331971861152e-4	0.0025587193111887433	2
COX7A2L	-0.393338	-3.59272	3.2724872296576796e-4	0.0025725285498852542	2
PTGDS	1.487950894440949	3.5918653816823713	3.283194455918157e-4	0.0025749059859187973	2
ESRP1	-0.444858	-3.59177	3.284449272041228e-4	0.0025749059859187973	2
USP8	-0.327563	-3.5913	3.2903579042707626e-4	0.0025749059859187973	2
SLC1A5	-0.623494	-3.59121	3.291413162830804e-4	0.0025749059859187973	2
SSR2	-0.451412	-3.59104	3.2935683859157687e-4	0.0025749059859187973	2
TOX	-1.07539	-3.59031	3.302848204880361e-4	0.0025793327164071165	2
SLC39A9	0.3690413896793074	3.589654114780956	3.311170239603267e-4	0.0025830026048546274	2
APOO	0.6358686254524386	3.588650944418735	3.3239352379912934e-4	0.002590126584358243	2
FOXA1	0.7418893416769958	3.587747711733334	3.335467945568836e-4	0.002596275813526834	2
ZNF544	0.5745287502015437	3.586505069779883	3.3513955165571837e-4	0.00260582879313552	2
RASSF8	-0.94445	-3.58417	3.381571399177492e-4	0.0026264274592740218	2
RDX	-0.434361	-3.5837	3.387578015926004e-4	0.0026282297337924276	2
EP400	0.4781311914462566	3.5811958473103047	3.4202514411569955e-4	0.0026506948668966715	2
MFSD6	0.5791174820142487	3.5803418553632715	3.4314497534662983e-4	0.002656486074073258	2
SREBF2	-0.447915	-3.58002	3.4356745546523635e-4	0.0026568719712224895	2
SLC6A14	-1.20325	-3.5779	3.463611732514369e-4	0.002675574393589106	2
MPP5	-0.526631	-3.57734	3.471078553481236e-4	0.0026784404855325987	2
CTSZ	0.5279562376233157	3.57629678369394	3.4849599250740806e-4	0.0026862447854895345	2
VKORC1L1	-0.47782	-3.57294	3.5299529740252014e-4	0.0027158211306784	2
MPRIP	-0.538856	-3.57287	3.530948370461258e-4	0.0027158211306784	2
IL6R	-0.764715	-3.57245	3.5365505467845905e-4	0.002717198857604971	2
MARK3	-0.438574	-3.57064	3.561104903086417e-4	0.0027331192636174547	2
IPO7	-0.51847	-3.56996	3.5703231695278923e-4	0.0027372477633047176	2
SNX25	-1.15458	-3.5696	3.575230229538317e-4	0.002737324881548403	2
PNP	-0.74614	-3.56939	3.578102089204925e-4	0.002737324881548403	2
NEBL	-0.609663	-3.56884	3.585659312616551e-4	0.0027401662271121126	2
SPAG1	0.5751026270417187	3.5670949762305657	3.6096067947639584e-4	0.0027555135381870477	2
LRP2	-1.61172	-3.56561	3.630122625544441e-4	0.0027682111572333544	2
SLC9A1	-0.596933	-3.56528	3.634740770962428e-4	0.0027687715488207386	2
FBLN5	-0.747519	-3.56323	3.6631699640285795e-4	0.0027874495030441593	2
PIP	2.064616694717013	3.5623431190071115	3.675595568042807e-4	0.0027939228571583386	2
LAMP3	-1.855	-3.55973	3.712305549902668e-4	0.0028186441275528575	2
CYP2J2	1.3253964151565047	3.5594710786264288	3.7160245159883397e-4	0.0028186441275528575	2
THG1L	-0.537945	-3.55746	3.7445678605028e-4	0.0028372761791057347	2
FAM81B	1.4952415781040163	3.5551047364053416	3.778285519747907e-4	0.002859785112080953	2
TRPM7	-0.43593	-3.55461	3.7853888729337916e-4	0.002862123294169452	2
DPAGT1	0.5171282315929996	3.552199672646916	3.820248443092194e-4	0.002885420699072812	2
RPS3	-0.575032	-3.55083	3.840191821396091e-4	0.002897414570005728	2
FMN1	-0.538167	-3.54832	3.8769330355849663e-4	0.0029220436092728132	2
ST7	-0.661552	-3.54801	3.8814668567207426e-4	0.002922371561607064	2
ST6GALNAC4	-0.768911	-3.54761	3.887432750627641e-4	0.002923775897887667	2
ARL8B	-0.554083	-3.54686	3.8985360398768675e-4	0.0029290370879159183	2
SDCCAG8	-0.636308	-3.54461	3.9318941729642474e-4	0.0029509900477089563	2
SCGB1A1	1.4051717331253126	3.543377932516898	3.9503614089109396e-4	0.002961732581023659	2
OSBPL8	-0.466456	-3.54294	3.9568616406818825e-4	0.002963489863241788	2
SPA17	0.8980235935433087	3.540412244099751	3.9950247041456487e-4	0.002988932438673502	2
IKBIP	0.5443402279310949	3.539890708175788	4.0029276516519884e-4	0.002991705886402377	2
COQ4	0.4758197999097017	3.538255152738353	4.02780640510163e-4	0.0030071476092538873	2
DPCD	0.7088733056396443	3.5371599794326207	4.0445459654983286e-4	0.003016486687657226	2
UBE2E2	-0.661623	-3.53646	4.055281955828687e-4	0.0030213333693896068	2
TCF20	0.4415871509249694	3.536045207960473	4.061651808283821e-4	0.0030229203959356624	2
VDR	-0.559329	-3.5348	4.080895546338186e-4	0.003032207211735425	2
CSRP1	-0.535433	-3.53468	4.082635235997206e-4	0.003032207211735425	2
ATP13A4	-0.725527	-3.53407	4.0921039109067294e-4	0.0030360770951888636	2
RPLP0	-0.576123	-3.53369	4.098041671737281e-4	0.0030367825270894116	2
PCDH9	-1.42799	-3.53322	4.1053485527067036e-4	0.0030367825270894116	2
RSU1	-0.416309	-3.53319	4.1058321965135945e-4	0.0030367825270894116	2
RPL4	-0.503776	-3.53269	4.1135429745787545e-4	0.0030393327884711417	2
EAF1	-0.629092	-3.53103	4.1393997455483857e-4	0.003055271240761904	2
GNAI2	0.4634693314279541	3.5306986300193435	4.144636890441808e-4	0.003055973219115832	2
RPS8	-0.503072	-3.52971	4.1601383145132e-4	0.003064234109760239	2
GALNT5	-0.552836	-3.52849	4.179359578152764e-4	0.003075215045637689	2
ACACA	-0.551827	-3.52676	4.2067540068193107e-4	0.0030921810380022353	2
RPH3AL	-0.401451	-3.52626	4.214765699651597e-4	0.0030948794478389175	2
CCDC84	-0.483205	-3.52545	4.2276175453437656e-4	0.003101122746738791	2
CHSY1	0.702590653120002	3.522884309182129	4.2687765404525446e-4	0.0031280962727057186	2
MCFD2	-0.462033	-3.52026	4.311218417993794e-4	0.0031559535236443275	2
CLPP	-0.47829	-3.51831	4.3430191986083345e-4	0.0031759719883156334	2
C12orf29	-0.512774	-3.5143	4.4092127591434073e-4	0.003220326751738817	2
DIDO1	-0.296052	-3.51409	4.412705801471002e-4	0.003220326751738817	2
FAM3D	2.107234325467363	3.51314825420239	4.4283031397155976e-4	0.00322840504971086	2
NSDHL	-0.601463	-3.5127	4.4358090414489595e-4	0.003228749754102359	2
ERP29	-0.431724	-3.51258	4.437832761599315e-4	0.003228749754102359	2
SOCS2	-1.0158	-3.51032	4.475694399569667e-4	0.0032529766634996657	2
ELK3	0.733189225050157	3.5096057324218912	4.4877159336878655e-4	0.003258392526190884	2
EML2	0.41416197333457866	3.5069023131264125	4.5335554580433533e-4	0.0032883265936774274	2
G0S2	-1.29294	-3.50522	4.562253327952279e-4	0.0033017419435419706	2
UBXN1	-0.48731	-3.50518	4.562940984240863e-4	0.0033017419435419706	2
DSP	0.8558137721444928	3.5050075540831926	4.5659432767635106e-4	0.0033017419435419706	2
TXNDC11	-0.524639	-3.50357	4.5906425287112266e-4	0.003316239233000106	2
KIF2A	0.637416282967904	3.5026521489000033	4.6065061248941406e-4	0.0033166270762087008	2
HMOX1	-1.27032	-3.50264	4.606635972676967e-4	0.0033166270762087008	2
SIX1	1.7103646292983457	3.502555224037766	4.6081824660161174e-4	0.0033166270762087008	2
CACNA2D2	-1.56823	-3.50246	4.609786020368615e-4	0.0033166270762087008	2
CAPN7	-0.369231	-3.50128	4.6303325027189366e-4	0.003328051486329236	2
NUDT2	0.6879630018656798	3.4989930221564918	4.670188028559205e-4	0.0033510343195867196	2
TMEM243	-0.898066	-3.49891	4.6717084343186524e-4	0.0033510343195867196	2
CXCL17	0.6762815956623308	3.4977057140677448	4.692786424547831e-4	0.0033627705735704556	2
LINC00342	0.9935703424598288	3.4965742110890785	4.7127338977354886e-4	0.0033736739649451843	2
PMM1	-0.745015	-3.49601	4.722720153950212e-4	0.0033770831816891046	2
ODF2	0.6243761889517045	3.4956592199448466	4.728922257879833e-4	0.0033770831816891046	2
STT3B	0.586853188931526	3.495502195142014	4.7317056080047905e-4	0.0033770831816891046	2
OSGIN2	-0.666517	-3.49509	4.7390607409543455e-4	0.0033789503083004485	2
SLC41A1	-0.579392	-3.49443	4.7507638478227424e-4	0.0033839107127848302	2
CS	-0.382179	-3.49355	4.7665230232347945e-4	0.0033917474207249584	2
FAM114A1	0.42389092926474026	3.4922997753010026	4.7888047154689734e-4	0.003402477051778205	2
SFTA3	-1.04536	-3.49217	4.7911458064310206e-4	0.003402477051778205	2
CLUAP1	0.938132008889928	3.4910707018555343	4.8108892465038736e-4	0.003413098540056977	2
UBE3A	-0.350909	-3.49076	4.816527450387356e-4	0.003413701860960422	2
TMEM11	-0.531719	-3.49024	4.825934714342983e-4	0.0034169726428267596	2
SOD2	-0.808951	-3.4883	4.86106173736326e-4	0.0034384295820833375	2
INHBB	1.1921179106390818	3.486900835205538	4.886525092518546e-4	0.0034496557628419496	2
ENKD1	0.9820343464562769	3.4868962348918924	4.886609145119732e-4	0.0034496557628419496	2
NKX2-1	-0.780932	-3.48616	4.900122212033695e-4	0.0034557736272799447	2
EFCAB14	-0.420658	-3.48275	4.962981252854689e-4	0.0034966458826930767	2
MLPH	-0.581597	-3.48072	5.000653520131615e-4	0.003512444785733842	2
IARS	-0.52766	-3.48069	5.001308238864921e-4	0.003512444785733842	2
MGP	1.0355343272207393	3.4806342582370235	5.002280493112718e-4	0.003512444785733842	2
SPATA33	0.6819194344474204	3.4804827429502176	5.005110662420173e-4	0.003512444785733842	2
SMC1A	-0.450052	-3.47786	5.054323714287265e-4	0.003543493420144366	2
LIPH	-0.65192	-3.47484	5.111648586941401e-4	0.00358016251717998	2
USP38	-0.54397	-3.474	5.127589561085167e-4	0.0035845174614436	2
EXOC7	0.5296425068607425	3.4737714920101523	5.131978855770268e-4	0.0035845174614436	2
STARD3NL	-0.5893	-3.47372	5.132948566807736e-4	0.0035845174614436	2
MTHFD2	-0.727364	-3.47185	5.168881349086119e-4	0.0036060786711334665	2
FLYWCH2	0.45333484468903323	3.471324657757318	5.178974351384283e-4	0.003609588184298137	2
TLE1	0.6198597788551479	3.4708313599448664	5.188497405942715e-4	0.003612692230250761	2
PRPF8	-0.361858	-3.47043	5.196330102507485e-4	0.003612692230250761	2
PKIG	0.8062681949064758	3.470307483210305	5.19862865110418e-4	0.003612692230250761	2
GNA15	0.6924255376399275	3.4684622260397586	5.234461090303065e-4	0.0036340513703856723	2
ARF5	-0.524876	-3.46787	5.245959603044421e-4	0.003638491436741899	2
BAG1	0.4747209601124358	3.4664587559394886	5.273626363325308e-4	0.003654125944655923	2
ZFP36L2	0.5221010783838209	3.463733009205031	5.327349841213857e-4	0.003687767414354835	2
KCNK6	0.8764116301032708	3.4600134145321455	5.401484784284847e-4	0.003735459409500578	2
ERP27	0.9583684879772212	3.4593047658294283	5.41571735970116e-4	0.0037416729432819063	2
MAN2A1	-0.545174	-3.45852	5.431584969240268e-4	0.0037466059852806527	2
CCND3	-0.441207	-3.45843	5.433366884684706e-4	0.0037466059852806527	2
NME5	1.2085204235358167	3.457569499552709	5.450716292493227e-4	0.0037523897786543494	2
UQCC2	0.40589285115187684	3.4574922007292064	5.452280239391172e-4	0.0037523897786543494	2
GLCCI1	-0.819056	-3.4567	5.468365418467745e-4	0.003759830803633078	2
RNF130	0.534112866388958	3.455692595730452	5.48880908315435e-4	0.0037702513259046735	2
ADD1	-0.307248	-3.45402	5.522979483959287e-4	0.0037900715804263445	2
TCTN1	0.7727967796410473	3.4531747549054375	5.540299598232425e-4	0.0037983015514804993	2
HNRNPR	-0.304556	-3.45188	5.566952555728317e-4	0.0038129079464306343	2
OTUD1	-0.900648	-3.45159	5.573034819013193e-4	0.0038134105815320596	2
KRCC1	0.3723450723149362	3.44974	5.61129122689313e-4	0.0038359066584609794	2
CES4A	0.776531466233508	3.448392020478194	5.639349012552609e-4	0.0038513944884578646	2
NRP1	0.7809064441955123	3.4477594930505377	5.652571305876915e-4	0.0038559459521951356	2
RAMP1	1.3545905274412289	3.44755608090228	5.656829545576594e-4	0.0038559459521951356	2
QKI	-0.710672	-3.44468	5.717288059791506e-4	0.003893434944251522	2
PSMA3	-0.532027	-3.43832	5.853252412380288e-4	0.003982222299644222	2
ZNF791	-0.300658	-3.43804	5.859414030225732e-4	0.003982614112060006	2
PLP2	-0.604511	-3.43678	5.886681395467133e-4	0.003997336985683872	2
ANPEP	1.4604165221638599	3.435111140740221	5.923108538687257e-4	0.004018245849746921	2
LPCAT1	-1.05507	-3.43477	5.93066829832795e-4	0.004019549901813525	2
DCUN1D3	-0.567509	-3.43315	5.966080717780754e-4	0.004038993828180266	2
PIGR	0.6982672791825254	3.4329425245423852	5.970686528614307e-4	0.004038993828180266	2
RPL14	-0.578967	-3.43187	5.994449409904453e-4	0.004050450176330502	2
ASL	-0.670579	-3.43159	6.00043749695184e-4	0.004050450176330502	2
FCGBP	1.1784986343152903	3.4313956950475295	6.004840027726252e-4	0.004050450176330502	2
EIF4G3	0.3597825030892882	3.4311471195712335	6.010345422942035e-4	0.004050450176330502	2
ANAPC4	0.6674301604889603	3.428963032818982	6.058920472960978e-4	0.0040793298368471936	2
COPRS	0.5725460802461696	3.4271029161023	6.100578112287902e-4	0.004103502069869126	2
CANT1	0.5686467517636178	3.4262593342745005	6.119557987133143e-4	0.004112389109166758	2
RPS28	-0.522492	-3.42548	6.13706259825635e-4	0.004120268957209771	2
GLTP	0.4404161151117085	3.4246114164971315	6.156793353418914e-4	0.004129627150505819	2
FUCA1	0.5507573080345729	3.4234714968938027	6.182673532464199e-4	0.00413586707482342	2
SGCE	-0.595864	-3.42343	6.183510630160601e-4	0.00413586707482342	2
HNRNPA3	-0.331381	-3.42326	6.187586169672622e-4	0.00413586707482342	2
DUSP14	0.721840067366905	3.4231803862050105	6.18929897452537e-4	0.00413586707482342	2
UBAC1	0.7531949424809322	3.4221954284384046	6.211764831338706e-4	0.004146992813431177	2
PCYT2	-0.6906	-3.42187	6.219129027999685e-4	0.004148025254409519	2
ARL13B	-0.5253	-3.42088	6.241953182353541e-4	0.00415935758786736	2
ETFA	-0.388862	-3.41653	6.342583016661714e-4	0.0042224665647803946	2
USP47	-0.400217	-3.41417	6.397633429692533e-4	0.004255142383741395	2
TLN1	-0.44296	-3.41287	6.428267320439576e-4	0.0042715327115316094	2
ENKUR	1.7146445962993824	3.4122949241350096	0.00064418376877633935	0.004276564498487244	2
GEM	-0.864029	-3.41142	6.462453403322343e-4	0.0042862597921570515	2
VPS4A	-0.431419	-3.41071	6.479290358804682e-4	0.004293433109505333	2
UVRAG	-0.478577	-3.40779	6.549058405855152e-4	0.004335634766364645	2
FUOM	-0.780876	-3.40701	6.567963146049332e-4	0.0043441166262830925	2
GCC2	0.4547030990827498	3.4059881349430934	6.592504422371125e-4	0.004356307370853209	2
TNFRSF21	0.8099071725256092	3.405170986434117	6.612263812244542e-4	0.004364726920831053	2
CRB3	-0.643088	-3.40496	6.617489202550306e-4	0.004364726920831053	2
FN1	0.9162572885443364	3.404431527749159	6.630192042741726e-4	0.0043690637028418215	2
SNX18	0.6894124059515189	3.4035593459959403	6.651396246310627e-4	0.004378989403157412	2
DDB2	0.6940912786844773	3.402674302717783	6.67297757592643e-4	0.004389144844682237	2
CEP290	0.5802580103707496	3.400163926404303	6.734546574003519e-4	0.004425559177202313	2
HSD17B14	-1.08946	-3.39901	6.763123592034631e-4	0.004440245967882773	2
PLEC	0.6547420947141334	3.3976008096770354	6.797953634626305e-4	0.004459007305877236	2
PAK1	0.5900960223006385	3.3958930081039904	6.840509276150731e-4	0.004482796979683338	2
ZZEF1	-0.273925	-3.39254	6.924849601071515e-4	0.004533900611169871	2
GOLT1A	-1.03581	-3.39185	6.942291041096522e-4	0.004539048484495818	2
ITGA2	0.8465422331515502	3.391723684879387	6.945444455238341e-4	0.004539048484495818	2
RPL39L	0.6677120325698713	3.391390036720961	6.953906169960378e-4	0.004540410303576038	2
IGFBP3	1.4877454200042048	3.3911395808957865	6.960264322312216e-4	0.004540410303576038	2
HSDL2	-0.562867	-3.38991	6.991500342436164e-4	0.0045537781237427345	2
GUCD1	-0.578987	-3.38983	6.993530218090175e-4	0.0045537781237427345	2
CDH26	0.7818611486178425	3.3888329889759783	7.019074734362895e-4	0.004564029770503858	2
BIK	0.7541679497360219	3.388715733408105	7.022076659526973e-4	0.004564029770503858	2
TGIF2	0.46103280405920416	3.387895182834206	7.04311744337146e-4	0.004570686180371712	2
RPL21	-0.480233	-3.38782	7.045139007333116e-4	0.004570686180371712	2
TMED5	-0.505204	-3.38707	7.064335426930263e-4	0.004577888390679122	2
CST3	0.4742080044771108	3.3868857675239936	7.069081512114605e-4	0.004577888390679122	2
KIDINS220	-0.625156	-3.38624	7.085797661307834e-4	0.004582809430742671	2
CDIP1	0.6054371915888073	3.386092993376287	7.089535486829125e-4	0.004582809430742671	2
ACTA2	0.8895475502723764	3.3838017678636922	7.148959817802064e-4	0.0046084316169542365	2
MMP28	-0.95987	-3.38355	7.155527304494256e-4	0.0046084316169542365	2
CYP4X1	0.7129169868993913	3.3833928270649687	7.159614494012939e-4	0.0046084316169542365	2
SLC25A36	-0.447844	-3.38335	7.16084331974106e-4	0.0046084316169542365	2
CETN3	0.623395653866302	3.383143918662411	7.16610685526272e-4	0.0046084316169542365	2
RIOK3	-0.432799	-3.38307	7.167953244322929e-4	0.0046084316169542365	2
ZNF22	-0.512476	-3.38125	7.215786911346861e-4	0.0046350054664777585	2
PPP1R9A	-0.457589	-3.37682	7.332950061926295e-4	0.004704187468401749	2
DCTD	-0.444664	-3.37668	7.336685083958969e-4	0.004704187468401749	2
RCOR1	-0.559487	-3.37437	7.398578685403239e-4	0.004739610604395786	2
CHD6	0.3753967994759738	3.373740126705436	7.415433820251264e-4	0.0047461439082936725	2
SND1	-0.400197	-3.3727	7.443468628200329e-4	0.004759814468077879	2
SORBS2	0.5742294618820766	3.3700376758491326	7.515790692415475e-4	0.004801755164598776	2
EXOSC10	-0.408842	-3.36918	7.539317948930005e-4	0.004812474214491579	2
EPB41L1	0.5251301744279204	3.3687416421898613	7.551217364175571e-4	0.0048157584800153684	2
ZNF131	0.27660324152193316	3.367849990955111	7.575680340221856e-4	0.00482704207558372	2
GNAI1	0.5893084398328872	3.366734030026388	7.606401070101242e-4	0.004840664188638135	2
GSTA2	2.1330972933868657	3.3665804650744384	7.610637525194039e-4	0.004840664188638135	2
SLC12A7	0.6672771649582281	3.3663188416789467	7.617860075968336e-4	0.00484093960264298	2
BASP1	1.33330570913184	3.36468699135461	7.663053869397349e-4	0.004865322714942395	2
ARF1	-0.399457	-3.36356	7.694450438440449e-4	0.004880910287017829	2
PSCA	1.8746111572328539	3.3627680916163953	7.716515867407642e-4	0.004885554416142888	2
ADK	-0.577045	-3.36271	7.71825332157702e-4	0.004885554416142888	2
SPDEF	1.2367592989609109	3.362560224296819	7.722327948096822e-4	0.004885554416142888	2
RPS27	-0.61429	-3.36183	7.742662208649251e-4	0.004894076378339465	2
ARL6IP5	-0.438092	-3.36047	7.780861669604392e-4	0.004913070352045078	2
CUL4A	-0.326649	-3.36026	7.786806784302761e-4	0.004913070352045078	2
GTF2H5	0.4099481408084114	3.360030611392577	7.79338368606309e-4	0.004913070352045078	2
BEX2	-0.80594	-3.35696	7.880436148298885e-4	0.004960110425183304	2
EDEM1	-0.655087	-3.35691	7.881914602710636e-4	0.004960110425183304	2
PAIP2B	0.7407105699426061	3.35551341605501	7.921781402655652e-4	0.0049808025926750266	2
DNAL1	0.7541493376407639	3.3539779121664335	7.965872125087739e-4	0.00500000344862055	2
SMAP1	-0.43295	-3.35396	7.966344905516051e-4	0.00500000344862055	2
RSL1D1	-0.408638	-3.3527	8.002856121088519e-4	0.005018501683672923	2
BEX4	-0.475975	-3.35023	8.074384630871888e-4	0.005058907066618327	2
COX6A1	-0.407854	-3.3497	8.089909646791986e-4	0.005064184001898758	2
DEGS2	1.1938888102125205	3.348951035496005	8.111813001578586e-4	0.005071602069642628	2
VPS51	-0.378561	-3.34881	8.115985920704403e-4	0.005071602069642628	2
ZC3H14	-0.327138	-3.34798	8.140288492536411e-4	0.005082334233956621	2
SRPRA	-0.412935	-3.34757	8.152311313895054e-4	0.0050840676527990685	2
ISOC1	-0.580628	-3.3474	8.157325939413934e-4	0.0050840676527990685	2
IL4R	0.567369384551275	3.3463344400194486	8.188756396263649e-4	0.00509919939784802	2
ORMDL1	-0.394743	-3.346	8.19859514985026e-4	0.005100871153440868	2
UCHL5	-0.512875	-3.34112	8.344088779717305e-4	0.005186865998202649	2
ERLIN1	0.5729467254799377	3.3401664785302967	8.372818225157775e-4	0.005200191110224298	2
SMIM14	0.3975924242060679	3.3389077438241674	8.410849264307382e-4	0.005219265035205538	2
PDCD4	0.8085861191791349	3.338266588738967	8.430282468336909e-4	0.005225940960738699	2
ACSS3	-1.27356	-3.33799	8.438545586892965e-4	0.005225940960738699	2
FSTL1	1.005284277885575	3.3375673093867992	8.45152487451984e-4	0.005225940960738699	2
TMEM63B	-0.634494	-3.33749	8.453910914080531e-4	0.005225940960738699	2
ZBED1	0.6344682480265491	3.3373460977577887	8.458255075304991e-4	0.005225940960738699	2
SFTPD	-1.53421	-3.33483	8.535015560906577e-4	0.0052681828281328285	2
LNX2	-0.818513	-3.33463	8.541401611951682e-4	0.0052681828281328285	2
NUCB1	-0.454179	-3.33394	8.562435540660818e-4	0.005276591651245603	2
TXNRD2	-0.506886	-3.33329	8.582645671493483e-4	0.005280211342590076	2
FHL1	-0.968208	-3.33327	8.583120541461287e-4	0.005280211342590076	2
NDNF	0.7302724631087898	3.3327953178988636	8.597816951087258e-4	0.005282655468612941	2
KLC1	-0.331945	-3.33245	8.608376511044649e-4	0.005282655468612941	2
SFTPC	-1.82251	-3.33242	8.609320693587991e-4	0.005282655468612941	2
IGKC	2.0728204307792817	3.3319123562472996	8.625141479919425e-4	0.005287812446416638	2
MED21	-0.545661	-3.32908	8.7132573226616e-4	0.00533490377111888	2
REPS2	-0.574499	-3.32897	8.716918504002097e-4	0.00533490377111888	2
D2HGDH	0.5944020883658916	3.327099678833063	8.775497681545129e-4	0.005366149096862502	2
FAM89B	0.7022831078651343	3.3203620010229304	8.990079263701332e-4	0.005492653397617009	2
SLC44A2	0.5565388817688743	3.31804139207826	9.065104980334601e-4	0.005533749872413159	2
ALOX15B	-1.62795	-3.3164	9.118668047589409e-4	0.00556168547299508	2
RNASE1	0.6372238864184325	3.3161180275075774	9.127727045432337e-4	0.00556245246443868	2
PCGF1	-0.634097	-3.31527	9.155554148824711e-4	0.005574645694374056	2
RPA2	0.580639327873322	3.3144295206733254	9.183032675671252e-4	0.005586606056103756	2
ZBTB11	-0.476443	-3.31276	9.238101015922229e-4	0.005603299130524525	2
IFT22	0.7184507786281769	3.31270174238819	9.239945916545551e-4	0.005603299130524525	2
FAM104A	0.33926328110543713	3.3125905376590854	9.243620186385118e-4	0.005603299130524525	2
TNRC6B	0.4112827165040309	3.312523216491428	9.24584517527959e-4	0.005603299130524525	2
NAB1	0.5822310888043688	3.3124046246400423	9.249765885872884e-4	0.005603299130524525	2
ING1	0.5122045360164944	3.309730495424114	9.338584086851647e-4	0.005649458655781936	2
BCR	0.3653049116220169	3.3096337626053693	9.341811718326652e-4	0.005649458655781936	2
ANXA2	0.6629700598005094	3.3083766498410228	9.383851215352794e-4	0.0056700728106326625	2
YBX1	-0.461182	-3.30741	9.416149354304508e-4	0.005684770948026345	2
CPSF2	0.35650182731059155	3.306881417836428	9.434081916399887e-4	0.0056907483977823815	2
PDZD2	-0.689364	-3.30665	9.442013120023223e-4	0.0056907483977823815	2
IFT81	0.6824628938764901	3.3056660409659036	9.475094578630637e-4	0.005702681990329715	2
LDHA	-0.592795	-3.30559	0.00094778094790192325	0.005702681990329715	2
KMT5A	0.49963265281998437	3.3052348704289245	9.489683991926851e-4	0.005703746386223211	2
IRF2	0.47720609242113893	3.3050608614033203	9.495577784638081e-4	0.005703746386223211	2
NUP35	-0.512975	-3.30401	9.531381405328043e-4	0.005715779875931958	2
C8orf34-AS1	-0.854252	-3.304	9.53164414093001e-4	0.005715779875931958	2
HEXB	-0.332648	-3.30305	9.56403218258932e-4	0.005730382307719483	2
C3	0.605781078443327	3.3022557874237157	9.591056468819587e-4	0.005741749170670332	2
PHB2	-0.404867	-3.30161	9.61324538521648e-4	0.0057502046641437505	2
DBI	-0.822921	-3.30047	9.652434722644019e-4	0.005765100007291292	2
MT-ND2	0.8131331528807589	3.300411406428682	9.654318946291448e-4	0.005765100007291292	2
MFSD2A	-1.30502	-3.29962	9.681680660297144e-4	0.005776601096896958	2
GLUD1	0.6170303022935495	3.299283758195609	9.693187547754469e-4	0.005778631038084395	2
SNTB2	-0.378483	-3.29871	9.712949061190045e-4	0.005785574503449041	2
COASY	-0.515821	-3.29649	9.790064151116785e-4	0.005826640851207235	2
INTS12	-0.768419	-3.29589	9.811164759217878e-4	0.005834329001936903	2
KLK10	1.2332201176222573	3.294695455002058	9.852839751934084e-4	0.0058509301645367495	2
IGBP1	0.34810343518712067	3.2946197607553938	9.855493867613795e-4	0.0058509301645367495	2
DAB2	-0.637108	-3.29284	9.91816947693683e-4	0.005883240297051548	2
SMS	-0.432635	-3.2926	9.926711648586605e-4	0.0058834126396028665	2
MT-CO3	0.879922098033517	3.2870223383113766	0.0010125280152222572	0.005996116900776324	2
PACSIN3	-0.545667	-3.28674	0.0010135582392127448	0.005997236718329353	2
C6orf132	0.6658733032971554	3.284914940458976	0.0010201316373609011	0.006031126512755576	2
GJA1	-1.12065	-3.28438	0.0010220819302648944	0.00603765050769569	2
RSPH3	0.6008338364772595	3.2823885487499265	0.0010293166603426893	0.0060753541293405424	2
DERA	-0.607869	-3.282	0.0010307301858151396	0.006078665198396978	2
FBLN1	1.2125306332737449	3.281458401300398	0.0010327175643238308	0.006085352259197449	2
IQCG	0.9288026438268258	3.2812012827352444	0.0010336595014324773	0.006085873034858434	2
CITED2	-0.860556	-3.27836	0.0010441112583356173	0.006142337683112996	2
TBRG1	-0.399879	-3.27684	0.0010497556983860882	0.006165533003420537	2
DDX39A	-0.655532	-3.27683	0.0010497835997408881	0.006165533003420537	2
NECAB3	-0.794566	-3.27368	0.0010615749638370714	0.006229653903010962	2
CYB561A3	0.44883578312029354	3.271434698534586	0.0010700329695041595	0.006274124237306462	2
WDR60	0.6788651853664165	3.2705829122731243	0.0010732607516737533	0.006285853856671057	2
SEL1L	-0.368326	-3.27044	0.0010737966335799926	0.006285853856671057	2
XRCC6	-0.342362	-3.26902	0.0010792227468111079	0.006312434934178178	2
RRN3	-0.422168	-3.26838	0.0010816528186793303	0.006321462784576742	2
ROPN1L	1.579474618354116	3.2680729531099293	0.0010828245062413145	0.006323127542588511	2
PLEKHB2	-0.525137	-3.26506	0.0010944232581726187	0.0063856283394196165	2
RPL7A	-0.481804	-3.26124	0.0011092805385832932	0.006463462380216029	2
LIMCH1	-0.62321	-3.26116	0.0011095761505447994	0.006463462380216029	2
C19orf48	-0.620358	-3.26051	0.0011121054639004868	0.006472907720498343	2
LATS2	-0.632311	-3.25598	0.001130002092682181	0.006567062756459721	2
SORT1	-0.444438	-3.25595	0.0011301242639798145	0.006567062756459721	2
ZBTB10	0.48880436595806853	3.2553743092182903	0.0011324300884870137	0.006573502465499857	2
CYC1	-0.572091	-3.25514	0.0011333649387079425	0.006573502465499857	2
CRBN	-0.334428	-3.25498	0.0011339983215378434	0.006573502465499857	2
PHLDA3	0.6931708276075742	3.2541280181744328	0.0011374101087208862	0.0065858163183649	2
PCK2	-0.820374	-3.25399	0.001137969944491663	0.0065858163183649	2
MORN5	1.9083997407603492	3.247418849044893	0.0011645686890260519	0.006734286093070357	2
NEK1	0.551227775237453	3.246813086008234	0.0011670500734030779	0.006742654145911892	2
FGD4	-0.634819	-3.24646	0.0011685000393944084	0.006742654145911892	2
ARL3	0.4647386647109152	3.2462900369249397	0.001169196566826134	0.006742654145911892	2
EID1	0.4612221059642941	3.246143523844163	0.0011697984822570842	0.006742654145911892	2
RSL24D1	-0.549331	-3.24395	0.0011788426502932457	0.006789295716147691	2
CCDC24	0.7287243191873177	3.242881637501478	0.0011832735732239068	0.006809314428641207	2
RBMS2	-0.593818	-3.24232	0.0011856074302121192	0.006817242723719685	2
HYI	-0.59485	-3.24157	0.0011887341062797332	0.006829713277819901	2
FURIN	-0.723328	-3.2409	0.001191545610448711	0.006840354430353711	2
CAPSL	1.8181068708293817	3.2379361061119485	0.0012039777032593043	0.006906163334061817	2
MIR22HG	-0.586391	-3.2364	0.0012104678666593346	0.006937810200386701	2
EFHD2	0.6982105382795819	3.2350857528123815	0.0012160620213553938	0.00696427486928832	2
SPP1	2.4001559475220806	3.2337772944096965	0.0012216467766300026	0.006990643272369116	2
HAT1	0.3962902824929332	3.2332439014094088	0.0012239301910032098	0.006998093233242089	2
STX7	-0.464869	-3.23287	0.0012255361966553554	0.00700036357580341	2
GRPEL1	-0.537398	-3.23259	0.001226722891895263	0.00700036357580341	2
TUBA4B	1.7184476967541515	3.2324647609153576	0.0012272727166555769	0.00700036357580341	2
DNAJC10	0.5149145306354714	3.2318181857090447	0.0012300529339274733	0.007010613444366814	2
FAM92B	1.6519386427224694	3.2312290382119677	0.0012325912805380968	0.007014264543447644	2
HIRIP3	-0.505763	-3.23106	0.001233322918098017	0.007014264543447644	2
HNRNPA1L2	-0.721742	-3.23098	0.0012336448439668087	0.007014264543447644	2
UFC1	0.5257535180061216	3.228352091919189	0.001245056259740361	0.007073506878046832	2
ZFP36L1	0.4469378857952049	3.22812058263786	0.0012460643661292262	0.007073597874603012	2
EMP2	-0.504956	-3.22744	0.001249040453392215	0.0070801432139467185	2
PRKD3	-0.40309	-3.2274	0.0012492033889403887	0.0070801432139467185	2
MAP2K3	-0.575707	-3.22325	0.001267468655348288	0.00717289599886481	2
RWDD1	-0.450874	-3.22322	0.001267580499098129	0.00717289599886481	2
AGR3	0.826893659829595	3.2227039353379348	0.0012698673357368375	0.007180138068044133	2
ATF3	0.6339569718686487	3.221663896821225	0.0012744854548436017	0.007200539851850143	2
APRT	-0.492489	-3.22113	0.0012768653163597935	0.007208273717850615	2
SLC36A4	-0.424546	-3.22072	0.001278667861792081	0.0072127388090012165	2
CPM	-0.872143	-3.21947	0.0012842812532858792	0.007238676154884047	2
PHLDA1	0.77208306531952	3.216734597759127	0.0012965848073292659	0.00730225092911348	2
FERMT2	-0.58599	-3.21221	0.0013171580352368208	0.007412262660803893	2
RPL18A	-0.557106	-3.20818	0.0013357637097198124	0.007511037263645318	2
LRRIQ1	1.3574010169094937	3.2067634994936802	0.0013423730466581435	0.0075422536033668735	2
SACM1L	-0.488654	-3.20651	0.0013435667045714895	0.007542541768899075	2
MISP	0.754988403917836	3.2062994178059028	0.0013445400544559222	0.007542541768899075	2
ASS1	0.4724767687773165	3.2042170018921805	0.0013543035864806076	0.007591340072017871	2
USP22	0.29551855719868203	3.2039511139803634	0.0013555549154791074	0.00759238534749885	2
CD36	-1.39733	-3.20333	0.0013584812383552816	0.007602803162851772	2
AP2A2	-0.410391	-3.201	0.0013695336200277178	0.007658646831998139	2
GRAMD1A	-0.499491	-3.2002	0.0013733148272634303	0.00767377329027293	2
MPC2	0.4756919395095935	3.1992695804076203	0.0013777627183719913	0.007692598419727719	2
RAB32	-0.594586	-3.19786	0.0013845035862018315	0.007724186674193317	2
DNAJB14	-0.483638	-3.19459	0.0014002929234451947	0.007805899039561597	2
SLC46A2	-1.36346	-3.19438	0.0014013395190236807	0.007805899039561597	2
CCL20	-1.48756	-3.19327	0.00140670957442608	0.007824341155228589	2
BTN3A2	0.9005408343515174	3.1932429935281004	0.0014068450716694322	0.007824341155228589	2
NFKBIB	-0.591148	-3.19291	0.0014084919686611127	0.007824973518293766	2
NDUFAF2	-0.534043	-3.1926	0.0014099700753943268	0.007824973518293766	2
MAPKAPK3	-0.672666	-3.19254	0.0014102511880795918	0.007824973518293766	2
TFAP2C	0.4449770484296225	3.1911118644105447	0.0014172639484696299	0.007857769792059457	2
PLEKHF2	0.7332921284349487	3.190618544817892	0.0014196858562980324	0.007865081705831369	2
PDCL	0.38023636388209575	3.189241877936673	0.0014264646729278084	0.007896500867993225	2
RAN	-0.639295	-3.18877	0.0014288171000785641	0.007903387062498187	2
MT-ND4	0.9094079504861369	3.1859503879456788	0.001442793365736249	0.007974509067984074	2
PAFAH1B1	-0.306902	-3.18486	0.0014482640745823183	0.007998545973487165	2
CAPS	1.229631229848955	3.1840078581156788	0.0014525106921137823	0.008015790429389526	2
PTPN6	0.5885539545817267	3.182674381266497	0.0014592161644822773	0.008046567094167546	2
NDUFC2	-0.408118	-3.18164	0.00146444978162101	0.008069186200121948	2
DNTTIP1	-0.642882	-3.1779	0.0014834698173597182	0.00816705400429642	2
LSM2	0.38778511869531673	3.177696146631167	0.001484502382828634	0.00816705400429642	2
TSR2	-0.401949	-3.17696	0.0014882547577166334	0.008181385059768386	2
RAB31	0.5605617577122611	3.1765555879989944	0.001490352245590679	0.008186603629477304	2
SFTPA1	-1.58193	-3.1762	0.001492203727360838	0.00819046387689205	2
GNPAT	-0.344272	-3.17555	0.0014955210360783075	0.008199281367321464	2
EFHC1	0.912490716397237	3.175436988075131	0.0014961101064355155	0.008199281367321464	2
POLR3H	-0.725481	-3.17035	0.0015225521164118762	0.008337785399398369	2
ZNF581	-0.616908	-3.16871	0.001531164982325138	0.008378515981564262	2
PSMB9	0.6576060586899732	3.167845082260022	0.0015357333105815991	0.008397069405250614	2
TMEM126B	-0.420111	-3.16739	0.0015381578016326267	0.008397652865760356	2
OCLN	-0.528505	-3.16738	0.0015381956020593304	0.008397652865760356	2
DEDD2	0.5765382712405733	3.167027629353968	0.0015400568555428902	0.008401381316006738	2
IFT46	0.8257608223745496	3.1661894247271958	0.0015445017956080929	0.008419187922542586	2
TOP1	-0.591255	-3.16596	0.001545730049730401	0.008419446336575829	2
IFI27	0.8594605776229671	3.165618310519728	0.0015475371382749534	0.008422725725282368	2
C11orf74	0.8586905514257964	3.1653264444244456	0.001549090460661865	0.008422725725282368	2
ETV1	-1.29051	-3.16518	0.0015498760380884245	0.008422725725282368	2
LRRC58	-0.371209	-3.16409	0.0015556650138373622	0.008447746800198318	2
TAPBP	0.34930055577992936	3.163423968543568	0.0015592507426346552	0.008460774577614226	2
EPS8L1	0.8227534629217962	3.162315250519026	0.001565200180383392	0.008486598696679533	2
PRKDC	-0.283317	-3.16017	0.0015767924708718047	0.008542956168173228	2
GSAP	-0.53025	-3.15834	0.0015867194367397402	0.008590212288499885	2
GLIPR2	0.7269743032173125	3.154700927552588	0.0016066270630796646	0.008691389195567533	2
DGKH	0.7649913829119217	3.153615396851527	0.0016126145782860907	0.008717165991796684	2
TEAD3	0.3919267506186432	3.1533682634695444	0.0016139805711097288	0.008717940509100278	2
CUL1	-0.390168	-3.1521	0.0016210192883036212	0.008749133816759647	2
CCDC47	-0.43614	-3.15188	0.0016222096642014379	0.008749133816759647	2
IVD	-0.529204	-3.14986	0.0016334701177276444	0.008803206303399928	2
MOK	1.0255395804071903	3.1493521056476066	0.0016363290911643085	0.00881195348942713	2
LAMTOR5	-0.415443	-3.14883	0.0016392750668930355	0.008821155642979127	2
PLAGL1	-0.692038	-3.14806	0.001643560072407638	0.008837543979084811	2
GPCPD1	0.43191024891630736	3.1467157181922603	0.001651154126722229	0.008870529155773918	2
RFTN1	-0.82907	-3.14653	0.0016521827095186204	0.008870529155773918	2
NCL	-0.567272	-3.1454	0.001658599045402582	0.008898277798134244	2
MAPRE3	0.5440918579323011	3.142635229190207	0.0016743435205248875	0.008975991955896578	2
DHRS9	1.8532851606059304	3.14144608757888	0.0016811575688513059	0.009005750162216237	2
CCDC167	0.5452224281525427	3.140801094326705	0.0016848641871428506	0.009016566359892604	2
RTCA	-0.356116	-3.14065	0.0016857058846755737	0.009016566359892604	2
AZIN1	0.4600159637596127	3.1401698455811258	0.0016884990969356572	0.009024736552587134	2
FMO2	1.0152026860774117	3.1377016251276237	0.0017027811658019846	0.009094254466043557	2
NDUFB9	-0.384379	-3.13682	0.0017078820239238887	0.009114669783366261	2
DNAH7	1.2118399456794842	3.1356790902532534	0.0017145670651432514	0.009143502748295724	2
ZCCHC10	0.3386762948141535	3.1344684260901454	0.0017216578060482097	0.009174454526998308	2
NEK11	1.1458060807510626	3.134156373683268	0.0017234898325232356	0.009177358107461292	2
RIPK4	0.7540036020411119	3.133845023052222	0.0017253195255400838	0.009180244938134925	2
ZMYND10	1.21369141335856	3.1335764915315365	0.0017268990209278674	0.009181797180623187	2
TJP1	-0.517316	-3.1329	0.0017308770186179837	0.009185205021246803	2
METTL3	-0.46946	-3.13282	0.0017313668271180375	0.009185205021246803	2
MLF1	0.7493903750893744	3.13281171508189	0.0017314047052672797	0.009185205021246803	2
APTR	-0.475496	-3.13178	0.001737515068895952	0.009207640491074498	2
USP36	-0.493195	-3.13157	0.0017387335567889495	0.009207640491074498	2
COL1A1	0.8479628569236288	3.1314404035099224	0.0017395108746557403	0.009207640491074498	2
NPHP3	0.4665467447265758	3.1312229746280646	0.0017407993523097368	0.009207640491074498	2
SMAP2	0.45530958807423777	3.1305525967327887	0.0017447775195669679	0.009221841152344314	2
TYMP	0.6343121268077375	3.128862254944912	0.001754845513126428	0.009268184080438098	2
SPIRE1	-0.797075	-3.12739	0.0017636360129973563	0.00930593320801722	2
CMIP	0.539778257324535	3.1272324777705354	0.0017646033235959723	0.00930593320801722	2
EEF2	-0.530031	-3.12672	0.0017676836132314645	0.00931357979615698	2
DZIP3	0.7982561041623013	3.1265563956584153	0.0017686657845717463	0.00931357979615698	2
TLR2	-0.702997	-3.12562	0.0017743092075683804	0.00933640195569192	2
PPP1R42	1.5098891738559226	3.1246000788468224	0.0017804694391524395	0.009361907891708625	2
MAF1	-0.456678	-3.12207	0.0017958684867708699	0.009435919167779147	2
ROS1	-1.19161	-3.12091	0.0018029006834081676	0.009465892395213723	2
RNF39	0.8168892637032414	3.118779817942863	0.0018160161379893686	0.00952773735383679	2
TNFRSF12A	-0.843588	-3.11703	0.001826853322404902	0.009571693920205989	2
B4GALT5	0.5127958671399491	3.116989740796975	0.0018270793023001896	0.009571693920205989	2
CD46	-0.398438	-3.11642	0.0018305991878408557	0.009583092664688181	2
CD320	-0.594351	-3.1146	0.0018419668606575947	0.009635527304833934	2
PLD3	-0.554926	-3.1111	0.001863945654961887	0.009743352287300774	2
CHI3L2	-1.78354	-3.11078	0.0018659498867165218	0.009746683291054067	2
FAM229B	1.0954783294733674	3.1098827151680677	0.0018716164432633431	0.009763833592743399	2
JKAMP	0.41153039527193386	3.109826601326077	0.0018719720226199473	0.009763833592743399	2
RNF19B	0.6043353222447484	3.104690019038265	0.0019047853341347689	0.009927718883319373	2
C9orf116	1.0908878536681264	3.103089430698176	0.0019151175876324172	0.009974279327844511	2
PHC2	-0.464564	-3.1028	0.0019170011240216254	0.009976801470273132	2
MRPS5	-0.362053	-3.10205	0.0019218650082621245	0.009994819481334025	2
RAE1	0.3355772971805039	3.101624285066763	0.0019246206139304667	0.01000185493974069	2
MRPS34	-0.444066	-3.10074	0.0019303576363721394	0.010024362671036674	2
FAM3B	0.6376782961508418	3.0994065031221147	0.0019390876893870986	0.01006236915962883	2
CREB3L4	0.733493211176698	3.0977420862401677	0.0019500105558269687	0.0101116911003973	2
RAP2C	-0.436644	-3.09736	0.0019525246820770099	0.010117369900587996	2
RNASEH2C	-0.450908	-3.09708	0.0019543987294405444	0.010119726173501148	2
GAMT	0.8298136586752072	3.0918485998541185	0.0019891427289696717	0.010289944937481359	2
SGSM2	0.5044800615611144	3.0916969588498167	0.0019901590559308264	0.010289944937481359	2
GBP1	1.0083899630267614	3.0913007897740856	0.00199281650625251	0.010296218615637969	2
KCNQ3	-0.976844	-3.09037	0.0019990434992699833	0.010320912490800131	2
ZBED5-AS1	0.6821375406559428	3.089986698505148	0.0020016545940573782	0.010326915525057241	2
ZNF622	-0.501184	-3.08956	0.002004511700849588	0.01033417818297727	2
DNAJC21	-0.462931	-3.08877	0.002009880794609389	0.010354371434656753	2
LRRC8A	0.4568040376862789	3.0871169497972417	0.0020210806477508622	0.010404552359901552	2
OAT	0.5336996796444099	3.0842248284392144	0.002040833042654845	0.010498657715821823	2
ETV6	0.5357195791611982	3.083807231670488	0.0020436997026037846	0.01050582471489905	2
HID1	0.723447995880948	3.083528875025253	0.002045612577958218	0.010506370190991371	2
EVI2B	-0.769804	-3.08336	0.0020467529025647987	0.010506370190991371	2
TMEM19	0.6111951748147469	3.081690234269647	0.0020582890904314384	0.010557986485450472	2
ARMC9	-0.591497	-3.08082	0.0020642863805148608	0.010576620320896169	2
ITGA10	-0.756378	-3.08074	0.0020648885675578496	0.010576620320896169	2
PDHX	-0.418096	-3.07933	0.002074680257237328	0.010619145896699317	2
MARVELD2	0.48402910867513166	3.077610883788831	0.0020866719040050015	0.01066824697789681	2
FAM136A	-0.357357	-3.07753	0.002087265713066767	0.01066824697789681	2
LDLRAD1	1.5691755416611142	3.0763203708135967	0.0020957253510368364	0.010703812143905905	2
ACYP1	0.5646636615232237	3.073716640065134	0.00211410129158843	0.010789937157498573	2
HECTD4	-0.215892	-3.07229	0.00212425295504054	0.010833272023247995	2
ZMIZ2	0.5189938652738331	3.0720935736421984	0.002125630793902377	0.010833272023247995	2
DOCK9	-0.523567	-3.07106	0.002132992833416032	0.010863027787325934	2
TSPAN19	1.8357001215307887	3.0703592262578847	0.002138014485070737	0.010880830320167277	2
WDR74	-0.484309	-3.06904	0.002147479585440181	0.010921205024385514	2
PLPP5	0.43620428237326203	3.067993453624303	0.002155013388717265	0.01095170738528446	2
RPL24	-0.424276	-3.06736	0.002159615027251145	0.010967275743803892	2
PPID	0.502882516464833	3.0667501291046078	0.002163996699253453	0.010978000239373505	2
TOP2B	-0.284315	-3.06662	0.0021649056757097125	0.010978000239373505	2
BAIAP2L1	0.3991251861327012	3.0664257699280406	0.002166345909789414	0.010978000239373505	2
KIF21A	0.5716022318669378	3.0654788106437247	0.002173217759646461	0.011005001865255161	2
DCTN2	-0.331377	-3.06447	0.0021805741797459545	0.01103441724740146	2
GRSF1	-0.37037	-3.06093	0.0022065372699131185	0.011157879953532294	2
CXCL6	1.4894536055496674	3.0604726203268444	0.0022098796487779555	0.011166320462341136	2
SPAG16	0.8520808641895318	3.0602749739449515	0.0022113386385449766	0.011166320462341136	2
NBEAL1	-0.494068	-3.05907	0.0022202240006680076	0.011203253449938354	2
TEKT1	1.4819168947987995	3.058704998308673	0.002222959308421069	0.01120912296254754	2
CEACAM6	0.8232482357731944	3.0580127137330053	0.0022281012280358924	0.011227110781551882	2
MANBA	-0.500273	-3.05759	0.0022312679376347436	0.011229519452550324	2
LHPP	0.4865375162367423	3.057196951774356	0.0022341742590104782	0.011229519452550324	2
ATL2	0.38802036546399954	3.057134091134621	0.0022346428609304808	0.011229519452550324	2
SNHG15	-0.75614	-3.0571	0.0022348791168539843	0.011229519452550324	2
MCAT	0.5351614989097527	3.056113624657236	0.002242262655710104	0.011258685024797916	2
SFTPA2	-1.30924	-3.05378	0.002259748259215223	0.011334494988748962	2
CHD1L	-0.46457	-3.05368	0.0022605402347827524	0.011334494988748962	2
EPB41	-0.51751	-3.05192	0.002273859720264627	0.011393267607510043	2
SPTLC2	0.335221169372413	3.0511719820527383	0.002279499659723048	0.011413506020944753	2
SLC7A6	-0.751053	-3.04651	0.0023151845215435857	0.011584046062179484	2
LAD1	-0.945783	-3.04326	0.0023403329256520247	0.011701664628260123	2
USP40	-0.303056	-3.04137	0.0023550631086103266	0.011767063745193854	2
RPS18	-0.560067	-3.03971	0.002368022765146906	0.011823531033261512	2
PLAC8	1.120860870172137	3.0393737218822934	0.002370705653712982	0.011828643324684088	2
KMT5B	0.2512772031250109	3.038499059464139	0.0023775984697879367	0.011854739223488104	2
EFCAB10	1.36857366392703	3.0377167073958264	0.0023837793701841094	0.011877251509023551	2
TUFM	-0.343994	-3.03723	0.0023876147846989848	0.011888054060686985	2
LCN2	1.1418788802826043	3.0360253241237856	0.002397192295549958	0.011927411770600976	2
B9D1	0.7140859416256526	3.0355957440951853	0.002400609914054381	0.01193608695063301	2
HTRA1	0.5474304023823239	3.03473252856994	0.002407490904726051	0.01195793273331916	2
NGLY1	-0.350646	-3.03458	0.002408725456463932	0.01195793273331916	2
ICAM1	-0.764842	-3.03441	0.0024100349702355726	0.01195793273331916	2
ZNF90	-0.963709	-3.03376	0.002415302014347371	0.011975732518982445	2
NBEA	0.7090832205970694	3.032951465695873	0.0024217454622995423	0.011996806185503736	2
CHCHD3	-0.400943	-3.03281	0.0024229173782784543	0.011996806185503736	2
RANBP2	-0.330802	-3.03107	0.0024368549983639445	0.012053837449550716	2
TSGA10	0.8830786089980647	3.030954876025509	0.0024378167745094156	0.012053837449550716	2
ERBB2	0.4217527710698683	3.029633625096979	0.0024485056321832364	0.01209829879242306	2
DAPK1	-0.530791	-3.02672	0.002472242818619904	0.012207126936814345	2
CBX3	-0.338495	-3.02555	0.0024817984605388613	0.012237951738497135	2
MEST	-0.523861	-3.02554	0.0024819184030668803	0.012237951738497135	2
RAPGEF5	-0.810419	-3.02482	0.0024877738876303156	0.012258346799449999	2
UBXN11	0.784633754512938	3.024527202276413	0.0024902207668243415	0.012261929604597759	2
PFDN6	0.5452208912078078	3.0230544886920394	0.002502371819408419	0.012313258158993808	2
SUPT6H	-0.354031	-3.02253	0.002506678309308024	0.012325942307149111	2
C4orf33	0.49132671323235516	3.0219881240453255	0.0025112040016664477	0.012339686100538781	2
CCDC90B	0.37570080282992996	3.01984010139935	0.0025290816666907055	0.012418975401862762	2
RASSF7	-0.484447	-3.01928	0.0025337574172433113	0.012433372598034969	2
ITPR3	-0.60397	-3.01828	0.0025421429379548603	0.01246594164210327	2
PFN2	0.7210749257560289	3.0179313334518714	0.0025450656575631975	0.01247169631506914	2
CCNC	-0.539167	-3.01746	0.0025490582037644522	0.012482682000577297	2
TIMM44	-0.494796	-3.017	0.002552937271915887	0.01249309728809902	2
SOD1	0.46352161170953504	3.0167336771940656	0.002555141928176387	0.012495309977981919	2
CFAP53	1.621497010655293	3.0157521149838726	0.0025634273185079466	0.012519448706224187	2
RBM23	0.37587134615224455	3.0157328976827875	0.002563589777151096	0.012519448706224187	2
PKIB	0.8207767410919198	3.015011099778428	0.002569698513082118	0.012525207981062771	2
TTBK2	0.5221188209708549	3.0149820204824254	0.002569944896329841	0.012525207981062771	2
PSMD11	-0.330152	-3.01487	0.0025709291131818975	0.012525207981062771	2
SMARCA1	-0.415448	-3.01476	0.002571795860347251	0.012525207981062771	2
SHMT1	-0.647006	-3.0135	0.00258257198683392	0.012569104618515937	2
NT5E	0.9432628839020282	3.013220383610023	0.002584911261504381	0.01257190811359225	2
SIVA1	-0.397031	-3.01279	0.002588616530435695	0.012581346872533405	2
EIF4E	-0.426354	-3.01226	0.00259307659330501	0.0125944387672103	2
FBXO9	-0.392955	-3.01059	0.002607442635543506	0.012649102669749415	2
PYGB	-0.430736	-3.01053	0.002607879512557032	0.012649102669749415	2
UNK	0.27922567002105525	3.0090317712804513	0.002620817073953812	0.012703212601829151	2
NAT9	-0.494394	-3.00851	0.0026253597415338745	0.012716586248054705	2
RASSF1	-0.584026	-3.00791	0.0026304999680507174	0.01273049765599349	2
TMEM68	0.4321289920705793	3.0077607115927414	0.002631802741225022	0.01273049765599349	2
CRK	-0.419232	-3.00513	0.0026546969571599605	0.012832535121729164	2
TMEM163	-1.05626	-3.00439	0.0026611516402517224	0.01285502113482031	2
LPCAT3	-0.420484	-3.00259	0.0026768946643521137	0.012922314798124964	2
CTNNAL1	-0.556838	-3.00215	0.0026807849082707285	0.01293233856290277	2
EIF4EBP2	-0.345064	-3.0004	0.002696235808655313	0.012993099124914934	2
FANK1	1.0180589407053404	3.0003128018211456	0.0026970247832923005	0.012993099124914934	2
ANKHD1	-0.354559	-2.99878	0.0027106629623250412	0.013049984416865324	2
S100A2	1.54757725361158	2.998223388660035	0.0027155854392555577	0.013064861121384701	2
MRS2	-0.380196	-2.99682	0.0027280868194663045	0.01311615578071123	2
XPR1	0.5795781212237869	2.9962496557946015	0.0027332256049285284	0.013132007118019142	2
UBQLN2	-0.407355	-2.99377	0.0027555497991743304	0.013230350214217491	2
GPN3	-0.522118	-2.99325	0.0027602792558064724	0.013244139363324461	2
RDH11	-0.419219	-2.99293	0.0027630884921653635	0.013248702723025583	2
TRIM25	-0.412745	-2.99189	0.0027725747018278674	0.013285253779591865	2
RPL23A	-0.432593	-2.99089	0.0027816392560656208	0.013319736666049613	2
SESN3	0.6153458080110257	2.9901691802422556	0.0027882297081434945	0.01333649904192172	2
CKS1B	-0.50463	-2.9901	0.002788880795442536	0.01333649904192172	2
MESP1	0.8951376251587869	2.9864060504254364	0.002822775584100025	0.013489537476295697	2
RBM25	-0.296208	-2.98569	0.002829380548849772	0.013512045085933606	2
SRSF10	-0.309929	-2.98521	0.002833812425110781	0.013524151667362696	2
ATP11A	-0.797394	-2.9838	0.002846935363649589	0.013577691734328809	2
CLPX	-0.394373	-2.98258	0.0028582604384442484	0.013622591528146717	2
ZYG11B	-0.353502	-2.97988	0.002883587202055659	0.013730530729877935	2
GOLT1B	-0.432223	-2.97976	0.002884759471719095	0.013730530729877935	2
MTHFR	-0.497904	-2.97903	0.0028915880673366988	0.01374893144269905	2
CFAP45	1.164075376347133	2.9789363857899	0.0028925082302798766	0.01374893144269905	2
TARS	-0.564502	-2.97873	0.0028944103920745122	0.01374893144269905	2
SELENBP1	-0.648434	-2.97817	0.002899772369157573	0.013765231020035617	2
HES1	0.686750104783852	2.9776482604705117	0.00290469120923601	0.013779406734432967	2
HIPK3	0.4683334499994491	2.9734067526195993	0.0029451387835276828	0.013953097620126724	2
CBR4	0.34373299837085514	2.9733983871717227	0.0029452190628738734	0.013953097620126724	2
CDHR3	1.5002434482644542	2.972871763599067	0.002950276847971034	0.013967778171336967	2
PANK3	-0.370388	-2.97181	0.002960518188798272	0.013998498967513297	2
KRT23	1.933460928413027	2.97161799168302	0.0029623502055703523	0.013998498967513297	2
API5	-0.348513	-2.97159	0.002962655672086615	0.013998498967513297	2
EFTUD2	-0.295889	-2.97092	0.0029691222482221852	0.014019762668757735	2
GALNT2	-0.551587	-2.96739	0.0030033501684535117	0.014171996493099628	2
RBMS3	0.7360521954961021	2.9662790072999226	0.003014269010567291	0.014214112463852372	2
WWC3	-0.609769	-2.96582	0.003018746274676238	0.014225816879340103	2
CHST12	0.6013696205091146	2.9632429003747855	0.0030441624559844845	0.01433611513287277	2
EPB41L4A-AS1	-0.413852	-2.9615	0.0030614487842332517	0.014408006489493787	2
HAGH	-0.362031	-2.9607	0.003069448298253737	0.01443612557160234	2
PPARA	0.3144106421376043	2.960344474842394	0.0030729523203258716	0.014441120804910038	2
COMMD9	-0.488839	-2.96018	0.003074561203626008	0.014441120804910038	2
AGFG1	-0.452751	-2.95955	0.0030809113795174734	0.014461420761000387	2
NMD3	-0.411972	-2.95825	0.0030938804509714293	0.014505742171299196	2
INSIG2	-0.547483	-2.9582	0.0030944226988143166	0.014505742171299196	2
HNRNPU	-0.349803	-2.95791	0.003097331767841751	0.0145098393592061	2
TLE4	0.42507972249087306	2.957360347644966	0.00310285267420807	0.014526158612674681	2
FGFR3	0.8631316498891772	2.9562707650807103	0.00311383601714309	0.014568012337421412	2
LTF	1.4123970562548962	2.955035521893807	0.0031263305294069376	0.014616876507981288	2
SLC39A11	0.38492702946718393	2.954290601966685	0.003133887486842301	0.014642606671812325	2
PNRC2	-0.414675	-2.95408	0.0031360090526431445	0.014642923736310164	2
ARHGEF2	-0.638762	-2.95341	0.0031428911712267325	0.014665454221758249	2
CCDC88C	0.49670471100952557	2.953200728339607	0.003144973889066361	0.01466557477373653	2
CYP2F1	1.6675344576048865	2.952286882117969	0.0031542972505317077	0.014699437513915737	2
COQ2	0.5576060342925144	2.950465432123265	0.0031729554792346067	0.014775207976121326	2
NFX1	-0.349486	-2.9503	0.003174701068642058	0.014775207976121326	2
ADAM15	0.4495612457432725	2.949709727428719	0.003180726108523542	0.014793592402982945	2
SEC23A	-0.414207	-2.94877	0.003190392293152062	0.014828876825406909	2
TWSG1	0.3801312874818509	2.947463294155957	0.0032039278672900814	0.014882088399855558	2
FAR1	-0.420745	-2.94666	0.003212287181521108	0.01491120286734733	2
WDR43	-0.476318	-2.94588	0.0032204213955488916	0.01493350554493307	2
ACSM3	-0.742892	-2.94579	0.003221280719229602	0.01493350554493307	2
DHX15	-0.353524	-2.94539	0.003225476191093196	0.01494323927387556	2
DPP9	-0.419207	-2.94317	0.0032487217375656947	0.015041159733015197	2
IFNAR2	0.483677126437025	2.942749979650181	0.0032531102682404754	0.015051704226187273	2
COQ9	0.35287867927602395	2.941489821937343	0.003266375766643077	0.015103280944335367	2
STOM	0.5642770313157617	2.941027412939234	0.0032712558259114	0.015116042798929542	2
PGD	-0.362254	-2.93958	0.003286529694476275	0.015176785441461038	2
VOPP1	0.47481780843327337	2.938884360016736	0.0032939594938235033	0.01520124996178743	2
ANXA5	-0.394628	-2.93782	0.0033053263306811985	0.015243840063232178	2
DOK4	-0.979362	-2.93755	0.0033081495565922656	0.015246998279575211	2
CETN2	0.8232725076708103	2.9371899123657936	0.0033120121088414584	0.015251119520814238	2
IFIT5	-0.617116	-2.93695	0.003314597802975044	0.015251119520814238	2
ULK3	-0.584998	-2.93687	0.0033154607653944	0.015251119520814238	2
NRDC	-0.274172	-2.93529	0.0033323934496364564	0.015313938774792925	2
USP24	-0.336234	-2.93519	0.0033334127599549254	0.015313938774792925	2
FAM183A	1.696460004744361	2.9349592914985614	0.0033359144983813294	0.015315563666103591	2
CTSH	-0.811124	-2.93454	0.003340463782485378	0.015320928702117613	2
NRP2	0.5611165726789948	2.9344512231076028	0.0033413806636455666	0.015320928702117613	2
ALAS1	-0.446859	-2.93338	0.0033529426205565426	0.015364062265146625	2
SSR3	-0.460141	-2.93295	0.003357554596892592	0.01537531424267449	2
ESD	-0.488787	-2.92994	0.003390278357215857	0.015515201981353699	2
LRIG3	0.5181857446704006	2.9293168345191343	0.003397079600480553	0.015536355068265777	2
RAB11B-AS1	-0.406886	-2.92842	0.0034069218365253293	0.0155713799323241	2
CEP126	1.1211879703695231	2.928118237277913	0.0034102033441667625	0.015576393237609877	2
RPS5	-0.477874	-2.92767	0.0034151401172018685	0.015588955848687145	2
WAC-AS1	0.44544931561544177	2.926837504583782	0.003424277404815	0.015618526327518131	2
METTL9	0.30396961116963694	2.926681139966853	0.0034259993234555903	0.015618526327518131	2
IGFBP5	1.3349494615997701	2.926213481111053	0.003431153981987579	0.015632030601643095	2
GCLC	1.0115691585136806	2.9245711809374426	0.0034493118221910067	0.015704721131687024	2
ATP1A1	-0.441843	-2.92385	0.0034573480027737186	0.01573126436488616	2
PPP4R2	0.316840638218208	2.9215559765776233	0.0034828768286688165	0.015837316191587156	2
MRPS25	-0.364598	-2.9182	0.0035205529401179775	0.015983750266637287	2
EIF2B4	-0.388161	-2.91813	0.00352137192792911	0.015983750266637287	2
B4GALT4	0.3803642361033829	2.918091908305764	0.003521805283153882	0.015983750266637287	2
EPHX2	0.4861716594288429	2.916066211697259	0.003544752662372428	0.01607180186617523	2
RPL6	-0.407742	-2.91598	0.003545714493056611	0.01607180186617523	2
C1orf194	1.6823567285336698	2.915761052011361	0.0035482213201869606	0.016072946640999383	2
GART	-0.349941	-2.91434	0.0035644544345971364	0.016127084451032316	2
ADD3	0.5603131299452697	2.9143153339018206	0.0035646963667358947	0.016127084451032316	2
TMEM39A	-0.437392	-2.91411	0.003567021002227849	0.016127368259914118	2
RSPH1	1.3522475744887679	2.913425860398981	0.003574867134331296	0.01615259991621175	2
RHPN1	0.7152175232534022	2.910832787037064	0.0036046687086484777	0.016276939767361397	2
RBBP7	-0.287537	-2.90993	0.0036150547174487544	0.01631163999335458	2
MAP4K4	0.3498851958858834	2.9097716720896742	0.0036169288680916677	0.01631163999335458	2
MTFR1	-0.366988	-2.90914	0.003624255762924318	0.016334351194469274	2
DNAH12	1.5343912448016193	2.9065728654472265	0.0036541178283287035	0.016458534501568953	2
CCDC78	1.5950171741422894	2.905448123388987	0.003667276349541407	0.01649775987759218	2
ZNF451	-0.322262	-2.90543	0.003667454334640057	0.01649775987759218	2
FTL	-0.658331	-2.90514	0.003670938444901346	0.01650302087777213	2
IKBKG	-0.526273	-2.90439	0.00367968651729932	0.016531924932794047	2
RMDN1	-0.438537	-2.90282	0.003698153932392829	0.016604431698967803	2
RSBN1	-0.371583	-2.90236	0.0037036213505079484	0.016608111671557128	2
CAMSAP1	0.5657320999305882	2.902359526637787	0.0037036321960414913	0.016608111671557128	2
RALGDS	0.5527404026984207	2.901295442741871	0.0037162332081692676	0.01665414379273845	2
APOC1	-0.730926	-2.90065	0.003723935247879494	0.016668341803551867	2
IFT172	0.7803017225353239	2.9004652612085198	0.0037260913711778584	0.016668341803551867	2
ASXL1	-0.270032	-2.90044	0.0037264147033466586	0.016668341803551867	2
CIB1	0.5153573820053446	2.8981668501979803	0.0037535084677215785	0.016779006504611196	2
ARPC5L	-0.540989	-2.89735	0.0037633269388608627	0.016812356562705483	2
NUDT14	0.49506639094319255	2.8965314549548116	0.003773128148984578	0.01684558779102069	2
PCMT1	-0.349232	-2.89629	0.0037760337202651807	0.016846433378967095	2
NCMAP	-0.844099	-2.89612	0.0037780430537122556	0.016846433378967095	2
GSN	0.38468694791048275	2.8954248223759502	0.0037864571382196887	0.016873399622191487	2
GNB5	0.35191208327319923	2.894368490921061	0.003799220171364089	0.016909296956637575	2
FAM49A	-0.590262	-2.89437	0.0037992557818419905	0.016909296956637575	2
PXMP4	-0.664154	-2.89399	0.0038038138100693576	0.01691581060094518	2
VASN	-0.662468	-2.89363	0.0038081261444858363	0.01691581060094518	2
C1orf116	-0.584234	-2.89358	0.0038087892047329215	0.01691581060094518	2
RPL18	-0.499074	-2.89341	0.0038108215821024494	0.01691581060094518	2
NME7	0.5318756209994503	2.8932660731783364	0.0038125817160896075	0.01691581060094518	2
UBE2R2	0.33071999855712186	2.8918305742473485	0.0038300442755958147	0.016976319066860947	2
STK24	0.4013445055331702	2.8917537067985783	0.0038309813995202335	0.016976319066860947	2
TMEM205	0.4343618139046362	2.8909703065743173	0.0038405440545970413	0.017008123670358328	2
RCHY1	-0.439793	-2.89065	0.003844438667944491	0.017014803043106284	2
RIF1	-0.274174	-2.88959	0.003857403211733389	0.01706159112882076	2
TMEM54	0.45420924850169275	2.885823690037803	0.0039039078682489964	0.017255419594214044	2
N4BP2	0.3050269804322579	2.8856497771629837	0.0039060655294616362	0.017255419594214044	2
DLG3	0.4619773649614206	2.8845908101903337	0.003919227064888854	0.01730284146913779	2
TBC1D22A	-0.292651	-2.88411	0.003925193241149792	0.017311283464411017	2
TMEM59	0.39007818197124267	2.884047512837816	0.0039259951419288374	0.017311283464411017	2
BAG5	-0.412781	-2.87957	0.003982120295487106	0.017540331715537177	2
OSCP1	0.8023073059493986	2.8793942102133516	0.003984399479692156	0.017540331715537177	2
ALKBH2	-0.55446	-2.87932	0.00398532081054281	0.017540331715537177	2
SOD3	-0.803519	-2.87789	0.004003479778118661	0.017609383601471965	2
ZNF688	0.6223249196596978	2.877294972365966	0.004011004656665113	0.01762824311236829	2
EDN1	-0.746681	-2.87716	0.004012712282100103	0.01762824311236829	2
LRPPRC	-0.380455	-2.87612	0.00402599264081297	0.017675694291253992	2
TOX3	0.9419884921630186	2.8752095865820126	0.004037593867425768	0.01771571955368968	2
NOTCH2	-0.392374	-2.87438	0.004048200670848374	0.017741918378825404	2
ENDOG	0.6646795925830391	2.8743545841463454	0.004048541543106442	0.017741918378825404	2
TFPT	0.550121229177673	2.8732296151495333	0.0040629869899848564	0.017794285773090925	2
TCEAL4	-0.34802	-2.87214	0.004077084297271357	0.017844636167240354	2
TAPBPL	0.5207487987171152	2.8719489167319976	0.004079489053660838	0.017844636167240354	2
PACSIN2	-0.424478	-2.87152	0.004085039815967429	0.01785796069150691	2
DHX32	0.33335148451633834	2.87108855766592	0.004090609092289212	0.017871349772072356	2
RIBC1	1.0448544023655442	2.870519990266689	0.00409797284747144	0.01788628169410988	2
ELOVL1	-0.47161	-2.87044	0.004099044079688015	0.01788628169410988	2
POFUT2	0.5427039204189749	2.869478435026237	0.004111493678465632	0.017929632983155933	2
IRF6	0.6711984860769497	2.8692174124190286	0.00411488845160037	0.017933468618527282	2
CCND1	0.45529526252846886	2.8660503104799373	0.004156281871083673	0.01810280375126853	2
ITPK1	-0.321224	-2.86488	0.004171690140922572	0.018147165042190116	2
TTF1	0.4018950272182873	2.8648657824544697	0.0041718602477935195	0.018147165042190116	2
NUDT4	0.4332047556981063	2.86469562118302	0.004174102478147516	0.018147165042190116	2
TMEM30A	-0.393677	-2.86446	0.004177147366402087	0.018149336211119364	2
DICER1	-0.291884	-2.86236	0.004204972816824583	0.01825910851641856	2
RPL5	-0.415481	-2.86135	0.004218413304999199	0.018296419027583104	2
RPGR	0.5604838392217023	2.8613284501237315	0.004218697458814393	0.018296419027583104	2
CLPTM1L	-0.417806	-2.85958	0.004241967109769241	0.0183861553146837	2
GGA2	-0.360168	-2.85802	0.004262919569709908	0.01846574515919298	2
C11orf97	1.3596938205045417	2.8575178877739145	0.004269685678279985	0.018483824460313474	2
SLC7A1	-0.654692	-2.85469	0.004307865592134676	0.018637792276650626	2
SECISBP2L	-0.503327	-2.85422	0.004314231097262334	0.0186540131737298	2
RABL2B	0.738714159301679	2.853035918049985	0.004330372674041062	0.018712458888431985	2
IRX2	-0.469829	-2.85058	0.004363906377727755	0.018845943351422707	2
TNS2	-0.722645	-2.85005	0.004371284371169434	0.018866378672178004	2
HYDIN	1.296428099798821	2.8477498798785303	0.0044029513688991365	0.018991556721264877	2
UQCRFS1	-0.429929	-2.84626	0.004423665582721253	0.019059137637666795	2
RNF13	-0.41341	-2.84623	0.004423965328238225	0.019059137637666795	2
C11orf24	-0.482926	-2.84537	0.004435921329585978	0.019099105724606293	2
BNIP2	-0.271864	-2.84476	0.00444447673490102	0.019124392951022494	2
SERTAD2	0.4444528806275602	2.8440760339427267	0.004454041772949696	0.01915174102026415	2
MRPS10	-0.308966	-2.8438	0.004457900958408652	0.01915174102026415	2
TNS1	-0.416958	-2.84373	0.004458890616218582	0.01915174102026415	2
THAP2	-0.550536	-2.84338	0.004463782008412187	0.01916120753761523	2
ACTR6	0.3478695450007297	2.842215619657146	0.00448011802582801	0.01921976024317311	2
PRELID3B	-0.556269	-2.84193	0.004484087617502661	0.01922522231677329	2
OAZ1	-0.491422	-2.84131	0.004492795328065802	0.01924767422621865	2
GNLY	-0.886047	-2.84118	0.004494723364187104	0.01924767422621865	2
C16orf91	-0.608054	-2.84093	0.004498181053136875	0.019250918912884704	2
CASP4	-0.347298	-2.83916	0.004523274628534646	0.01934669952096702	2
RNF146	-0.438409	-2.83853	0.004532239575220556	0.019373422165061487	2
ACBD6	-0.308123	-2.83824	0.004536248127832616	0.019378938976301108	2
PET117	-0.483903	-2.83727	0.00455007751730498	0.019407761587657134	2
MYO1C	-0.482897	-2.83705	0.004553253270403342	0.019407761587657134	2
C5orf24	-0.368478	-2.83701	0.004553795358033389	0.019407761587657134	2
PPRC1	-0.554817	-2.83701	0.004553882908295987	0.019407761587657134	2
EIF2S2	-0.383566	-2.8367	0.004558282032827925	0.01941119092436473	2
RHBDD2	0.37886868515735067	2.8365675902660503	0.004560132510282037	0.01941119092436473	2
CCDC170	1.411272800308605	2.8352904067275047	0.004578404605704712	0.019467992830106643	2
C16orf87	-0.45395	-2.83525	0.00457893744405173	0.019467992830106643	2
HIPK1	0.48949401653703883	2.834485554659069	0.00458995330020561	0.01950319846869249	2
MIIP	-0.557683	-2.83427	0.0045930372130235765	0.019504678575853546	2
PPM1B	-0.312849	-2.83396	0.004597463914938245	0.019511855781851002	2
PTER	-0.423153	-2.83173	0.004629641520107903	0.019636730540374393	2
MT-CO2	0.8148763627656835	2.8313518397893924	0.004635170239895381	0.01964078218592211	2
FNBP4	-0.318079	-2.83105	0.004639563089072229	0.01964078218592211	2
DNAL4	0.582265415312888	2.831019511755624	0.004639989040447188	0.01964078218592211	2
TM7SF2	-0.61847	-2.83091	0.004641615425424791	0.01964078218592211	2
LYST	-0.365841	-2.83058	0.0046463552004030375	0.019649177093044874	2
CADM1	-0.771857	-2.82849	0.004676770984079113	0.01976608009275879	2
ZNF264	0.3252547815816956	2.827755104838017	0.0046875650609992945	0.01979007548835791	2
AACS	-0.394366	-2.82773	0.004687999649345935	0.01979007548835791	2
SPATA13	0.5574251756408194	2.8251062894715084	0.004726493428832748	0.019940768134661238	2
MSMB	2.1795038476932933	2.822724449997813	0.004761747804167749	0.020077623798767624	2
HSD17B12	-0.424702	-2.82221	0.004769436427552064	0.020093678901997744	2
CALCOCO2	-0.442087	-2.82193	0.004773579539639136	0.020093678901997744	2
BABAM1	-0.296302	-2.8219	0.004774010106589646	0.020093678901997744	2
PSMB10	0.6151460058426723	2.8212605211413484	0.004783533804412605	0.02012174059160918	2
PHF5A	-0.369432	-2.82101	0.004787301205194801	0.02012174059160918	2
MT-ND1	0.8935237414826549	2.8208845439015438	0.004789143588213293	0.02012174059160918	2
RPL10	-0.452952	-2.81962	0.004808037701295631	0.020189227803438074	2
RPS9	-0.436391	-2.81698	0.0048478061573764926	0.020344236552145022	2
MRPS36	-0.443308	-2.81612	0.004860754669190902	0.020366733361696795	2
ARID4A	-0.384951	-2.81607	0.004861457151632241	0.020366733361696795	2
HERC1	-0.301588	-2.81605	0.004861736350856654	0.020366733361696795	2
TWIST2	-1.16156	-2.81565	0.004867888101853409	0.020380529751153734	2
DCTN6	-0.332631	-2.81459	0.004883918582119687	0.02042945297109047	2
MYO9A	-0.406978	-2.8145	0.004885303971347721	0.02042945297109047	2
CYB561	0.4763118506030521	2.8137601010005358	0.0048965755353763355	0.02046458591279793	2
ZNF165	-0.606063	-2.81318	0.004905398600752586	0.020466735538363007	2
2025-03-07	-0.359909	-2.81311	0.004906533812742974	0.020466735538363007	2
TIMP2	-0.728616	-2.81299	0.004908352928462145	0.020466735538363007	2
MYO5C	-0.255149	-2.81282	0.004910874973863335	0.020466735538363007	2
RNF135	0.36846346859491963	2.8127853524765025	0.004911442427228486	0.020466735538363007	2
MT-CO1	0.6453113732486581	2.812568400069194	0.004914756941419143	0.020468584691774823	2
YAF2	-0.334732	-2.81219	0.004920533511830403	0.020480679474226954	2
ROGDI	0.5252450373556067	2.810553410358268	0.004945637963458756	0.020573161423256086	2
CHID1	0.40861013194128454	2.8090969174649714	0.004968068813111938	0.020654420196786073	2
WDR55	-0.32832	-2.80869	0.004974416217561034	0.020668757360845086	2
ZDHHC6	-0.277618	-2.80745	0.004993604996190436	0.020736402808874673	2
CFAP52	1.3309731845578558	2.806997274545457	0.0050005664779722405	0.02074248588944763	2
BAZ2A	-0.335382	-2.80698	0.005000888253009885	0.02074248588944763	2
C17orf97	0.9221695650697069	2.805312336901574	0.005026784339055007	0.0208377746148036	2
MBD2	0.3323341736052641	2.804282196164005	0.005042874626217569	0.020892327765793882	2
NUDT3	0.40338687915688465	2.803584105001035	0.005053804917268159	0.02092545241586642	2
IGHA1	1.8878173885119252	2.802956479715628	0.00506365017512111	0.02095404860627598	2
STXBP1	-0.527883	-2.8017	0.005083375030736166	0.021012160336549707	2
YIF1A	-0.432734	-2.80153	0.005086131339793719	0.021012160336549707	2
FBXW2	-0.387398	-2.80148	0.005086915523313915	0.021012160336549707	2
MRPL45	-0.348528	-2.80132	0.0050894811923171595	0.021012160336549707	2
ACSS1	-0.455086	-2.80021	0.005106992931311884	0.021072256713109798	2
TPRKB	0.3341968090792278	2.79912600178881	0.0051241137838748865	0.021121324345393485	2
TFF3	1.3568235394195935	2.7989054672415774	0.005127614678277944	0.021121324345393485	2
ELOVL5	-0.442556	-2.7989	0.005127771730978419	0.021121324345393485	2
SMAD1	0.40110754032463536	2.7982157753273653	0.005138577207288052	0.021141399199315035	2
RPL11	-0.424536	-2.79814	0.00513985394106363	0.021141399199315035	2
WDR73	0.329867164824749	2.797891897673059	0.005143732489573641	0.021141399199315035	2
CCDC17	1.277278929881104	2.797843329126278	0.00514450597627091	0.021141399199315035	2
PCIF1	-0.411001	-2.79641	0.005167360299558022	0.021223086944613303	2
FAM120AOS	0.2576787949845203	2.7960112502149803	0.005173759940329406	0.02123713780918173	2
FBXO6	0.6140519810343416	2.794816158722259	0.0051929236465221035	0.02130353601824085	2
TMTC2	0.517055313153709	2.792086064493683	0.005236942481379872	0.02147176532043616	2
ETF1	-0.39776	-2.79132	0.005249423426732333	0.02151056840954111	2
TIMM23	-0.27253	-2.79101	0.005254322004095312	0.021518274491211704	2
UBR3	-0.345206	-2.78888	0.005289087336505829	0.02164821625102558	2
STK3	-0.383454	-2.7885	0.0052952512376426295	0.021661010513133648	2
PSMD7	-0.30584	-2.78736	0.005313930619490192	0.021724957177158874	2
KIF3A	0.41554126837482547	2.786925986810732	0.005321063053361721	0.02173703515086329	2
FAM214A	0.42003894113581786	2.7867992254964538	0.005323144811846895	0.02173703515086329	2
ANKRD26	0.6117838490604389	2.786623560633433	0.005326030912841258	0.02173703515086329	2
MYO1B	-0.530587	-2.78633	0.005330857900377375	0.02174428880417087	2
ITPR2	-0.487561	-2.7861	0.005334584870743203	0.021747049816122948	2
C5orf49	1.1981034066960767	2.7828611171080384	0.00538818655418679	0.021953011503629605	2
GPATCH2	0.3044010962722604	2.7823327977810015	0.005396966644544777	0.021976226256769996	2
CD164L2	1.0377324582342569	2.781640941169987	0.00540848408024972	0.022009581038735005	2
STRAP	-0.413362	-2.78147	0.005411331775722646	0.022009581038735005	2
SULT2B1	0.8773238950334543	2.7812279100914834	0.005415370441354309	0.02201298802383531	2
ADPGK	-0.284635	-2.78105	0.00541834417697489	0.02201298802383531	2
CLDND1	-0.395421	-2.78032	0.005430506919335075	0.022049837320534785	2
PIAS3	0.42603310177353126	2.7795889377470444	0.0054427747048674665	0.02208707094234777	2
RTCB	-0.328226	-2.77867	0.005458138731463856	0.02213681976981644	2
DCPS	0.508863048723188	2.7772758168162857	0.005481664032217987	0.022219593263055285	2
STOX1	1.0340429871941244	2.7748116621362158	0.005523368364749134	0.022371918345702603	2
CLMN	0.9416929896623469	2.7746850635622686	0.005525518682578161	0.022371918345702603	2
PPP1R7	0.3951827994615374	2.7740715990200244	0.005535949281146108	0.022401429270472048	2
TMEM150A	-0.451517	-2.77138	0.005581869244482559	0.022574434323970872	2
IER3IP1	-0.393001	-2.76859	0.005629964813178223	0.022756036914943725	2
GATA6	-0.51936	-2.76788	0.005642260526398541	0.022792814477745945	2
ZNF593	-0.479129	-2.76752	0.005648536798314852	0.022805247662505603	2
SLC35C2	-0.316229	-2.76422	0.005705841557081897	0.023023571195242742	2
BLVRA	-0.333462	-2.76383	0.005712706651152219	0.02303310278027411	2
NAPA	-0.376849	-2.76372	0.005714664630898303	0.02303310278027411	2
DTNB	0.43161641773756787	2.762602336835625	0.005734258251122712	0.023099017700850245	2
ASPSCR1	-0.443739	-2.7622	0.0057414147197462255	0.023114786534043245	2
PSMC1	-0.319208	-2.76155	0.005752722216644856	0.023147240070359947	2
H2AFJ	0.40083674743414	2.760650550182539	0.005768636355355351	0.02319674667222744	2
SMARCE1	-0.271834	-2.76049	0.005771532762486883	0.02319674667222744	2
NBL1	0.903462621987824	2.7586103758258536	0.005804769847687652	0.02331718817690871	2
AQR	-0.263525	-2.75739	0.005826542581813726	0.023391468810997674	2
NOP10	-0.38813	-2.75611	0.005849316394171435	0.023469682549489217	2
MRPL35	0.4829482343811698	2.755508696219512	0.005860094671601759	0.023499704729201657	2
C5	-0.721754	-2.75478	0.005873106480074936	0.023530470369861424	2
RPS7	-0.416456	-2.75471	0.005874367076907901	0.023530470369861424	2
CAMSAP3	-0.547115	-2.7514	0.0059340405664696835	0.023750665981522465	2
MACC1	0.4810613490613352	2.75129583251153	0.005936000950781631	0.023750665981522465	2
RAB11FIP2	-0.446474	-2.75063	0.005948093053892667	0.02378570020990169	2
SLC22A31	-1.20545	-2.75042	0.005951917857629584	0.023787653769562184	2
PSMD2	-0.365253	-2.74927	0.005972730251179007	0.023857460331039956	2
HMGB2	-0.493537	-2.74853	0.00598622730139227	0.023897984691448423	2
INSR	0.5067367699221489	2.7478520885754953	0.005998706372756572	0.02393127387798217	2
CSNK1A1	0.357820287223765	2.7477115073456133	0.006001278778938586	0.02393127387798217	2
ATF6	-0.437055	-2.74742	0.006006572912620404	0.0239389965718186	2
KMT2C	-0.320497	-2.74648	0.006023880835646083	0.023994564445897527	2
MED4	-0.322223	-2.7453	0.00604554860729448	0.02406742689559444	2
ALDH7A1	0.40932967657834046	2.744613342699238	0.00605822301059048	0.024104425259771273	2
DPY19L1	-0.599354	-2.74419	0.006065964615774036	0.024114055958025144	2
ARPC1B	-0.317723	-2.74412	0.006067407628148262	0.024114055958025144	2
TTC1	-0.259286	-2.74247	0.006097813883481767	0.024221399993997212	2
FGF7	-0.716005	-2.74051	0.006134311373171582	0.024352806286588743	2
AHCYL1	-0.382626	-2.74004	0.006143263706382633	0.024361893572788503	2
SDC1	0.42561980842663205	2.7400259142956545	0.00614343403139884	0.024361893572788503	2
SSNA1	-0.459471	-2.73984	0.006146998527276493	0.0243624788768657	2
CLSTN3	-0.499782	-2.7384	0.0061738354222549575	0.024455248089265472	2
RPL3	-0.446797	-2.73789	0.006183468026683157	0.02447980401457574	2
NNT	-0.387022	-2.73718	0.006196783940482224	0.024518906490365294	2
DHPS	-0.350529	-2.73688	0.006202411091476397	0.024527560223087472	2
RAB40B	0.3941615878787124	2.736458650531824	0.006210439941255719	0.024545696663610464	2
UBE2H	0.3999343732319658	2.73572640567464	0.006224275231520238	0.024577945719327393	2
CYB5B	-0.338748	-2.73566	0.00622549368430649	0.024577945719327393	2
DYNC1LI2	-0.243173	-2.73454	0.00624674996834583	0.024648216532543312	2
HSP90AA1	0.700113270546098	2.73404800685884	0.0062560922374495	0.024671425693039234	2
RUNX1	0.5386287426706556	2.733424634423247	0.006267946597858264	0.02470451036082334	2
ME1	-0.678059	-2.73266	0.0062824860020685245	0.024748135466711924	2
DNTTIP2	-0.472268	-2.73098	0.006314665713095168	0.024861163188497265	2
METTL21A	0.3213576961022806	2.730449037615747	0.0063248111123283615	0.024887363813963143	2
NRBP1	-0.337771	-2.73026	0.006328446419234822	0.024887933242771252	2
URM1	-0.344165	-2.72971	0.006339026539733825	0.024915798913066247	2
WBP4	-0.321614	-2.72905	0.006351751653939374	0.024952060216301784	2
IGF1R	0.4918381891218218	2.728770568918234	0.006357091560678027	0.02495894170630181	2
CORO1C	-0.506006	-2.72859	0.006360504499347881	0.02495894170630181	2
WDR54	0.9482445959865763	2.7276599710030407	0.006378532100421338	0.02500375963363067	2
CFAP157	1.4126977428746028	2.7276388996599725	0.00637893951943537	0.02500375963363067	2
ZMAT2	0.35972803155253563	2.7252214895818687	0.006425836413151301	0.025173743750422403	2
MRPS14	-0.389688	-2.72493	0.006431443494598375	0.025181873759739928	2
UBE2D2	-0.286128	-2.72444	0.006441077714986332	0.025205754175550245	2
EFCAB1	1.615625123311488	2.7240539299125315	0.006448597555166323	0.025221338764857864	2
AMFR	0.3364374683034238	2.722635007796443	0.0064763565361475265	0.02531602088965563	2
RARS2	-0.280752	-2.72201	0.00648854158332404	0.025349754240602963	2
CNOT6	0.28125480535433783	2.7216948252418494	0.0064948088916252575	0.02536034359106686	2
ARMCX1	-0.369669	-2.72105	0.006507521031386166	0.025394472563350517	2
PREP	-0.349495	-2.72089	0.006510672629145125	0.025394472563350517	2
TBC1D15	-0.298719	-2.72012	0.006525734475517411	0.025439303887610246	2
DDX21	-0.548842	-2.7199	0.0065302134190188856	0.02544285337574025	2
CHD1	-0.274912	-2.71959	0.006536253174230249	0.025452476860874755	2
APLP2	-0.342216	-2.71935	0.006541024402979131	0.02545715283473865	2
UBR2	-0.238482	-2.71883	0.006551358725147587	0.025483463017077084	2
RABL2A	0.8121898984575981	2.7185738704761166	0.006556401388422206	0.02548917224615612	2
HSPBP1	0.5029612606177428	2.717502127559433	0.006577673250440143	0.025557934755116193	2
AHCTF1	-0.259828	-2.71665	0.006594653527596454	0.025609956237343526	2
PSMA5	-0.319946	-2.71617	0.006604214018879012	0.025633122457597905	2
LCOR	0.37593899359475413	2.71581315892175	0.006611321747072046	0.025641128173519386	2
SLC41A3	0.35222011758392124	2.715705636045759	0.006613469103941396	0.025641128173519386	2
NDUFA10	-0.239221	-2.71336	0.006660545687486436	0.02579734181552393	2
ANKLE2	-0.393488	-2.71333	0.00666099667354552	0.02579734181552393	2
STXBP2	-0.39728	-2.71274	0.006672881756452281	0.02582934143512745	2
HNRNPA0	-0.401552	-2.71173	0.006693320672954777	0.025894398479743657	2
RNH1	-0.352733	-2.71016	0.006725131081524263	0.02598978866682264	2
C15orf61	-0.538056	-2.71015	0.00672526789485102	0.02598978866682264	2
EIF1AD	-0.427683	-2.7096	0.006736343057185905	0.02601848645597806	2
INF2	-0.592107	-2.70939	0.006740763479083126	0.026021463782275413	2
FAM122A	-0.386032	-2.70882	0.0067523130412771295	0.026051943714451263	2
MYCBP	0.47871996512628723	2.7081227004287056	0.006766500075908646	0.026092561136413544	2
MAGOHB	-0.352735	-2.70731	0.006783176592891737	0.026142729247198966	2
HUWE1	-0.24605	-2.70645	0.006800760719471421	0.026196339238158416	2
TMTC3	0.4328868491666342	2.7059410885223705	0.006811112766124455	0.026222048608243717	2
ZNF37A	-0.297907	-2.70478	0.006835034566411962	0.026299944122243544	2
KIAA2013	0.44811822665095924	2.703639648026914	0.006858462210318406	0.02637087090792588	2
MRPL36	-0.403233	-2.70352	0.0068608647313046995	0.02637087090792588	2
TLE3	0.5039076904812292	2.7026707866285387	0.006878483704298483	0.026424347420069064	2
C9orf135	1.4575937376652464	2.7024222077123135	0.006883629038091491	0.02642987347420158	2
DUSP5	0.7951549960911466	2.702011999804551	0.006892127491346107	0.026448261040526236	2
SLC25A1	-0.468923	-2.70024	0.006928941423266857	0.026575229880523233	2
EIF4A1	-0.429466	-2.69815	0.006972591605216931	0.026728267819998236	2
MRPL9	-0.305842	-2.69635	0.007010379892561538	0.026858682769459307	2
CELF2	-0.544285	-2.69564	0.007025271367879577	0.026887058042447	2
RPS26	-0.60662	-2.69564	0.007025328069155506	0.026887058042447	2
STRBP	0.43477355573057835	2.694137642442551	0.007057101486500796	0.026994170385595855	2
WWTR1	0.4595874354394215	2.6938773091037436	0.007062615724130995	0.02699512613387959	2
NKAP	-0.357568	-2.69377	0.007064923613719399	0.02699512613387959	2
PSENEN	0.5351074191467767	2.693577104981526	0.00706897928552693	0.026996155493201397	2
C8orf82	-0.568585	-2.69199	0.007102727141140483	0.027097611549239904	2
TANC2	-0.552751	-2.69197	0.0071031467020377815	0.027097611549239904	2
SEC24C	-0.341905	-2.69064	0.007131491081319377	0.027191193267276554	2
FRK	0.504488620743477	2.6881693726790106	0.007184494468326121	0.02737864540842611	2
RIPK2	-0.430954	-2.68786	0.00719124674354342	0.027389737864030223	2
STAT2	0.485762598809966	2.6872130576729694	0.007205097829235947	0.02741471473617326	2
ILF2	-0.409673	-2.68719	0.0072054944481891574	0.02741471473617326	2
LRRC46	1.4439394182203815	2.686788571118659	0.0072142601759452	0.027433426695727615	2
MVP	-0.351589	-2.68651	0.007220249336679624	0.027433493549738792	2
BTG1	-0.514042	-2.68643	0.007221972986375836	0.027433493549738792	2
EIF4H	-0.273886	-2.68522	0.007248239932456611	0.027518610606185108	2
PSMA7	-0.301516	-2.68443	0.0072654499822334346	0.027569270023057153	2
SLC19A2	-0.456919	-2.68405	0.0072735926675580745	0.027585487084940994	2
RAP1GAP	-0.597757	-2.68386	0.007277816843226507	0.027586833648168524	2
NONO	-0.297372	-2.68349	0.007285851083995015	0.02759553196585489	2
TANK	-0.389561	-2.68338	0.007288162327097053	0.02759553196585489	2
JAGN1	-0.43555	-2.68306	0.007295293457497748	0.02759553196585489	2
CC2D2A	0.5780989116201475	2.682893028331527	0.007298833239348547	0.02759553196585489	2
AMD1	-0.471554	-2.68276	0.007301725539547245	0.02759553196585489	2
MRPS35	-0.332887	-2.68269	0.007303333635283054	0.02759553196585489	2
IDH3B	-0.473807	-2.68245	0.007308506645695952	0.02760045147447677	2
MBOAT7	0.3432745030751693	2.6820561703438095	0.007317117273494455	0.027618341005831375	2
RPS3A	-0.456589	-2.68067	0.007347456348834966	0.027718181887403867	2
MNS1	1.0027603149587985	2.6799271462632253	0.007363818510638228	0.02776521733519332	2
ZNRF1	0.3463475377822562	2.679223654408409	0.00737930863851993	0.027808916803724684	2
ICMT	0.3932535340318455	2.678962553805251	0.007385065224115711	0.027815908635998424	2
DUSP3	-0.452681	-2.67835	0.007398541942051904	0.027850167334508253	2
EFR3A	-0.316733	-2.6782	0.007401972945146303	0.027850167334508253	2
NAF1	-0.457324	-2.67547	0.007462418189526663	0.02806278570217569	2
ARHGDIB	0.41551797973948745	2.675158291166912	0.007469397408585991	0.028074224313768114	2
SLC9A3R2	0.6541789671190772	2.6732939602519608	0.00751104003689142	0.028215866945751223	2
NT5DC2	0.5587634358269946	2.672702961707104	0.007524284265830928	0.028250735553119806	2
CSPP1	0.540230614601031	2.6725125709817767	0.0075285553638005254	0.028251894602051443	2
SVBP	0.5020581170565234	2.671416549249068	0.007553185086312744	0.02831849643531765	2
SIRT1	0.3940211856427388	2.6713693717711804	0.007554246875171693	0.02831849643531765	2
MAL2	-0.455651	-2.67042	0.007575745558679	0.02837802034852162	2
ENC1	0.6153550899721052	2.670311417695425	0.007578092647270764	0.02837802034852162	2
GNAS	0.37623648071569454	2.670036307540648	0.0075843045423719824	0.02837802034852162	2
TMEM218	0.4129900806162439	2.669959226174759	0.007586045832297645	0.02837802034852162	2
DHX40	0.36775061148658733	2.669559577575444	0.007595079755312378	0.028396915917869563	2
TMEM116	-0.427337	-2.66882	0.007611865865244539	0.028444760806705223	2
LTBP3	0.4355606527905803	2.6679532956477887	0.007631486580861208	0.02850174629046223	2
PSMD3	-0.34905	-2.66779	0.007635110156351032	0.02850174629046223	2
B9D2	0.5741569605969573	2.6668096495975204	0.0076575028934306845	0.028570379712276703	2
DAZAP2	-0.294684	-2.66578	0.0076810599550857376	0.02864328320071198	2
DNAJC9	0.3367216530867493	2.664559614433458	0.007708920146564445	0.0287321487950886	2
TMEM107	0.6489429388240017	2.66351265550932	0.0077329503049225765	0.028803286210253402	2
IVNS1ABP	0.3924849009343954	2.6633762534986616	0.007736085987746881	0.028803286210253402	2
ZNF146	0.2887175919543017	2.6620402455901937	0.007766859144093506	0.028902769153124584	2
FHOD1	-0.489747	-2.6612	0.007786160877148814	0.028959482031335963	2
PPP4R3A	0.219084249459795	2.660382814763674	0.00780518826433488	0.02901511591486324	2
CHD2	-0.378551	-2.65949	0.007825986715092348	0.029077272161859534	2
GCA	-0.392463	-2.65925	0.0078315338247282491	0.029082727172037717	2
HSPA9	-0.344531	-2.65893	0.007838983702872676	0.029095238834712222	2
RUVBL2	0.5556760092944604	2.658714202565334	0.007843947061665092	0.029098513293273728	2
DYNC2LI1	0.49002547493614	2.6577364384405477	0.00786673876136572	0.02916788734713343	2
UBE2L6	0.4231918103809879	2.6564650799464964	0.007896462860080946	0.029259545496416316	2
HLA-DOA	0.8487809742827941	2.6562353429347354	0.007901844782650904	0.029259545496416316	2
ANP32A	-0.307463	-2.65615	0.00790377063479633	0.029259545496416316	2
SP1	0.26449698089349305	2.654829731060061	0.007934844883021309	0.0293566610297219	2
ATPAF1	-0.305345	-2.65452	0.007942240194054586	0.0293566610297219	2
CCDC93	-0.250863	-2.65451	0.007942356118700358	0.0293566610297219	2
PLAGL2	-0.427869	-2.6537	0.0079614893098139	0.029409516070263188	2
LMO7	-0.531873	-2.65355	0.007964905404162443	0.029409516070263188	2
AIG1	0.3672628913659105	2.653131753668993	0.00797487353650268	0.029431080908521794	2
ERGIC3	0.3672096739516504	2.6527412812855116	0.00798410419001146	0.029449903194403368	2
UNC93B1	0.7489446884263998	2.651026668986031	0.008024750471158797	0.029584524746309317	2
SMIM15	-0.393267	-2.65046	0.008038151510842794	0.02961861512780833	2
MGST1	-0.470193	-2.64999	0.00804944366249609	0.029636278258692958	2
IRAK3	0.47628416937019846	2.6499126580735806	0.00805125820295768	0.029636278258692958	2
CDC25B	-0.809632	-2.64967	0.008056943048148848	0.029641900894376308	2
SCAPER	-0.377943	-2.64902	0.008072514251362748	0.02968387138329881	2
ODC1	-0.909214	-2.64847	0.008085717069315195	0.02971363985908916	2
DLST	-0.385785	-2.64833	0.008088944595580934	0.02971363985908916	2
RAB27A	-0.470398	-2.64624	0.008139196924795625	0.02988283937888404	2
SMC6	0.38342011955322997	2.6446094774740923	0.00817852455364531	0.03001177563947044	2
SNX30	-0.763597	-2.64314	0.008214075887258929	0.030126728948640002	2
HINT2	-0.398508	-2.64293	0.008219203702294496	0.030130037222292936	2
DDX52	-0.310272	-2.64235	0.008233263746850865	0.030166069123867763	2
PON3	-0.635276	-2.64199	0.008241972459394035	0.030179909511031406	2
CIPC	0.41156353830175574	2.641847929795829	0.008245506834149955	0.030179909511031406	2
PDP1	0.6025887710547105	2.6407581767627266	0.00827207395539579	0.030261424475404784	2
PERP	0.47361047592652533	2.6405865034180973	0.008276266160875081	0.030261424475404784	2
SNHG7	-0.629802	-2.63947	0.008303516244284295	0.0303455001649139	2
ANTXR1	0.45673780779789963	2.637490135861328	0.008352205461967263	0.030505601514766528	2
IRX3	0.47751712624097353	2.6371827979142606	0.008359776913506168	0.030505601514766528	2
TM2D3	-0.359845	-2.63717	0.008360160639530687	0.030505601514766528	2
PDAP1	-0.251467	-2.63655	0.008375293015725403	0.030545186292645587	2
LPGAT1	0.41432210534179575	2.635795663840892	0.008394026225342393	0.030597856332664247	2
KIF3B	0.3897648145082584	2.6334029626545212	0.00845339874599828	0.03079853503268663	2
MAP3K8	-0.484379	-2.63263	0.008472670631645064	0.030852983454356133	2
PPIL6	0.8058461906320613	2.6320057690702257	0.008488242152119114	0.030878628365174417	2
EIF2D	-0.249319	-2.632	0.008488374697860008	0.030878628365174417	2
PODXL	0.6630523011768028	2.630770627209748	0.00851915117699758	0.030974782198874423	2
C1QB	-0.899092	-2.62994	0.00853997965282538	0.031034686505935247	2
USO1	-0.336527	-2.62915	0.008559918689826088	0.031091299163759557	2
MPZL2	-0.427459	-2.62884	0.008567615524503767	0.031103410738142493	2
NCBP2	-0.312264	-2.62847	0.008577008641362696	0.031121664942959808	2
ECSIT	-0.312924	-2.62704	0.00861317377143999	0.031236993382689284	2
CDV3	-0.46676	-2.62538	0.008655186343858277	0.03137340042283148	2
RICTOR	-0.362996	-2.62426	0.00868371755361236	0.031460826299418765	2
MRPS12	-0.52187	-2.62318	0.008711251126204887	0.03153751720886507	2
ALG13	0.26184837808885353	2.6230858227190166	0.008713731963739719	0.03153751720886507	2
ILK	-0.404289	-2.62237	0.008731988839355729	0.03157557056898511	2
KRT7	0.4347640491291936	2.622288949011298	0.008734134525053436	0.03157557056898511	2
IDS	0.4130893162602221	2.6221564268955557	0.008737531659552262	0.03157557056898511	2
TXNL4A	0.34522195374910314	2.621178911490947	0.008762626248629035	0.03164820947749743	2
TAGLN2	0.4048339030346286	2.6210278644795717	0.008766509637876216	0.03164820947749743	2
TTC25	1.0586594434859529	2.6198690334662973	0.008796354149793387	0.03173988111742249	2
TACC1	-0.598994	-2.61859	0.008829420219045639	0.03184307848345746	2
FAM184A	-0.507771	-2.61743	0.008859401204506052	0.03193505085345205	2
RPL8	-0.417644	-2.61642	0.008885635434025393	0.032013431351491185	2
PKN2	-0.261053	-2.61528	0.008915310350515581	0.03210412262584651	2
DPH3	-0.460032	-2.61224	0.008995232273073235	0.03236997625515387	2
SNX7	0.40935543667312935	2.6121218448650847	0.008998217803326084	0.03236997625515387	2
RUFY3	-0.43368	-2.61106	0.009026202773479793	0.032454274218311104	2
LAMTOR1	-0.352819	-2.60876	0.009087099628464063	0.03265676428979273	2
KLF4	0.5474095464943457	2.6081094216609886	0.009104384595145872	0.032691657608610036	2
TMEM165	-0.367115	-2.60805	0.009105979244137382	0.032691657608610036	2
TMEM63A	0.3375776862536071	2.607477510122754	0.009121206211998117	0.03271211919022767	2
PUM3	-0.491343	-2.60739	0.00912357655030988	0.03271211919022767	2
RSPH9	1.2057568952355295	2.607318535838492	0.009125442506221998	0.03271211919022767	2
PIR	-0.490955	-2.60673	0.009141271608315708	0.03272166305432997	2
CDHR4	1.4437129312453456	2.6067049625761607	0.009141809279860256	0.03272166305432997	2
DDIT4	0.6888950261473792	2.606702584548036	0.009141872763565961	0.03272166305432997	2
DSTN	-0.485028	-2.60403	0.009213530063614025	0.032961600277756145	2
FXYD3	0.5140466195160311	2.603817145912928	0.009219192819645146	0.03296531835710627	2
RSRP1	0.31773834893529807	2.6034570224960745	0.009228883769474972	0.03298342921120629	2
ILKAP	-0.247649	-2.60244	0.009256432795127192	0.03306531354171186	2
SUCLG1	-0.27031	-2.6009	0.009297994441302583	0.03319714590209686	2
ZNF655	-0.258767	-2.5998	0.009327880107782759	0.03328717976400954	2
[truncated: 5,132 more rows]

## Sheet: DEmeta_Macrophage
Table S2: The differential genes of Marcropgage cell in the training set
gene	logFC	Z	P.Value	adj.P	k
IL1R2	-3.29707	-9.25015	2.2418111354973535e-20	2.4890829037427116e-16	2
SEL1L3	0.9906747705364917	8.555687078592092	1.1716874091321417e-17	6.504622651797085e-14	2
HMGB2	-1.2782	-7.79431	6.476275728613504e-15	2.396869647159858e-11	2
SLC28A3	3.4201837606892957	7.735213871202426	1.032294182085557e-14	2.8653905759239847e-11	2
PGD	-0.909423	-7.63689	2.2253533963093756e-14	4.941619751844599e-11	2
IL1B	-1.94097	-7.59162	3.159243745388132e-14	5.846180550840738e-11	2
MED30	-0.725881	-7.56074	4.007896224272094e-14	6.357095968299008e-11	2
H2AFY2	1.2705291676439634	7.480450425659492	7.406830518497312e-14	1.0279754905859456e-10	2
FAIM	0.9853613050113917	7.463705118039001	8.412275462540125e-14	1.0377943828953667e-10	2
GPX3	-1.38484	-7.17809	7.069060785223031e-13	7.624366765049929e-10	2
SLC29A3	1.0374809436110588	7.15916952351045	8.116726356868319e-13	7.624366765049929e-10	2
ADAMTS2	-2.15686	-7.1571	8.24033154828417e-13	7.624366765049929e-10	2
SYS1	-0.766254	-6.91724	4.605277847119313e-12	3.93326153358198e-9	2
TSHZ2	1.7577340407053106	6.894042886310087	5.422866368642361e-12	4.300720377931152e-9	2
IDI1	-1.00043	-6.88022	5.976081684137719e-12	4.423495662598739e-9	2
KCNJ5	2.263987720497617	6.716592258579689	1.8602354779669298e-11	1.2908871569916763e-8	2
EIF1B	-0.948391	-6.65402	2.851910810761689e-11	1.862633278346296e-8	2
TMEM236	-1.64727	-6.64167	3.1014175800578314e-11	1.9130577439656725e-8	2
EHD1	-0.841123	-6.58543	4.5356180089988776e-11	2.6504719344165545e-8	2
ST6GAL1	1.493943438685522	6.486940060837885	8.759716648457828e-11	4.862956697391363e-8	2
P2RY1	-1.2028	-6.35722	2.0543382607630693e-10	1.086157986154874e-7	2
FAM20A	1.083821038374931	6.265332667074699	3.7203031225711723e-10	1.8775693440867148e-7	2
RILPL2	-0.913776	-6.21905	5.001856653201615e-10	2.41459193132598e-7	2
ZC3H15	-0.480576	-6.16208	7.179699395674083e-10	3.10954800005958e-7	2
UGCG	0.9402885156728193	6.160985748184157	7.229349837455069e-10	3.10954800005958e-7	2
MAP1B	1.5749983589919563	6.1598441312379615	7.28165793042863e-10	3.10954800005958e-7	2
LRRC57	-0.468952	-6.13922	8.292896324109507e-10	3.4102232550588093e-7	2
NECAB1	-2.07814	-6.13339	8.602610891586129e-10	3.411242454617171e-7	2
NRP2	0.8036605792035318	6.108406288733991	1.0063091724112863e-9	3.852776117683625e-7	2
LILRB4	1.491103019116837	6.089851106248597	1.1301574710577765e-9	4.182712800384831e-7	2
MREG	1.250817701579613	6.071585192768161	1.2665374033001519e-9	4.5362467060779316e-7	2
ZNF532	0.6212598018274098	6.062552538544396	1.339780218991857e-9	4.648618678583309e-7	2
TP53TG1	0.7680805610645122	6.041954492217412	1.5225841551318715e-9	5.122803598311869e-7	2
BCL11A	1.1310825644487683	6.017206264813177	1.774529118107309e-9	5.794881411278074e-7	2
CHIC2	-0.573052	-6.00581	1.903751634848357e-9	6.039244114777517e-7	2
SULT1C2	2.2062733968668873	5.986787108571156	2.140266247181637e-9	6.600937817349365e-7	2
ANPEP	-1.15969	-5.96357	2.4678022214133932e-9	7.405407584960245e-7	2
CNIH3	1.1116289598877471	5.933132611194403	2.9720860224103438e-9	8.683966080742644e-7	2
GOLM1	1.045282792883489	5.9272436522401355	3.080617196472778e-9	8.770280187804424e-7	2
DHRS9	1.2668812255790822	5.919437397004776	3.230447734555189e-9	8.966915299191565e-7	2
FOLR2	1.3860175157289558	5.873510983438299	4.266607485243254e-9	1.1554181197233136e-6	2
PC	0.8829708548537321	5.868763008318388	4.390584892219049e-9	1.160682477578764e-6	2
SBDS	-0.814735	-5.83407	5.409001443088986e-9	1.39665448889807e-6	2
IGFBP2	1.3851229960645872	5.829959231019034	5.5440919218509654e-09	1.3990011956434378e-6	2
ADIPOR2	-0.576478	-5.82513	5.706730536518304e-9	1.4080406477102827e-6	2
TMEM243	-0.595764	-5.78098	7.426572888479111e-9	1.781305666246216e-6	2
HS3ST2	2.773568160417813	5.778422472830548	7.5404274802821e-9	1.781305666246216e-6	2
FLT3	-1.51658	-5.76038	8.392326696713117e-9	1.9412500690334527e-6	2
TRAF5	0.7550483288816527	5.755250952277402	8.651317860191871e-9	1.960318004116538e-6	2
FCAR	-1.7734	-5.74926	8.963530445265658e-9	1.990441570675692e-6	2
LEF1	1.1254075258427088	5.73509876823587	9.745553768912205e-9	2.1215344637422606e-6	2
TDRD3	1.0792016942219922	5.728653126607646	1.012311504418952e-8	2.1215344637422606e-6	2
ERMN	-1.44796	-5.72859	1.0127112183944862e-8	2.1215344637422606e-6	2
SRGAP3	1.521992211489524	5.71716706069433	1.0831461762815129e-8	2.2270688880099328e-6	2
PCDH7	2.1637561702107377	5.7094772614662395	1.1332369567604807e-8	2.2876963510748393e-6	2
ITGB5	0.7844553936968236	5.703944755425031	1.1706603227174802e-8	2.321043136273604e-6	2
LXN	1.1952935304663472	5.676695164076691	1.3732186603320905e-8	2.5818598115994327e-6	2
MOAP1	-0.639106	-5.67525	1.3848461847770958e-8	2.5818598115994327e-6	2
PMEPA1	0.8858573749824805	5.674840174639024	1.3881820054313066e-8	2.5818598115994327e-6	2
MSL3	-0.710467	-5.67397	1.395222810915662e-8	2.5818598115994327e-6	2
SCGB3A1	2.9396125454448714	5.669615026200922	1.4311873794738397e-8	2.6049956515242694e-6	2
MIF	-0.967231	-5.66096	1.505258136953996e-8	2.695625983000035e-6	2
PLXNA1	0.8169243100624921	5.653830481236215	1.5691097209995213e-8	2.737758842416411e-6	2
CYCS	-0.9127	-5.65285	1.578101107039992e-8	2.737758842416411e-6	2
AIG1	0.6263445029246805	5.633432741002032	1.7665743341143762e-8	3.017580743334141e-6	2
PACS1	0.47045965198992584	5.6231171323460325	1.8754214374377885e-8	3.151458295977488e-6	2
HMGCR	-0.695783	-5.62071	1.901717606327044e-8	3.151458295977488e-6	2
GPATCH11	-0.950529	-5.6107	2.0151139467133013e-8	3.2902661985820273e-6	2
SERP1	-0.566395	-5.58762	2.3020538780858065e-8	3.7043049577372045e-6	2
VANGL1	1.0681532442378385	5.582618251506566	2.3692441181886237e-8	3.757959634892613e-6	2
INSIG1	-1.1567	-5.57749	2.440198129538564e-8	3.815988708769954e-6	2
ZFAND6	-0.606956	-5.57483	2.4776622648064858e-8	3.820761684187001e-6	2
BICD1	0.8158954373716887	5.571906045154882	2.519673036320833e-8	3.832319140037015e-6	2
DNTTIP2	-0.772841	-5.56323	2.648218171432808e-8	3.973400859110604e-6	2
BNIP3L	-0.616244	-5.54771	2.8943026008814594e-8	4.284725570344912e-6	2
ZBTB46	1.0981775496388706	5.5336822344650916	3.1357685742676553e-8	4.581110326328128e-6	2
TRABD	-0.738126	-5.52518	3.291536428206663e-8	4.746224540568646e-6	2
ATP6V1D	-0.591237	-5.51902	3.408882762055268e-8	4.8524135009102095e-6	2
IRAK3	-0.673557	-5.51328	3.521981049436374e-8	4.929637290608724e-6	2
SLC36A4	-0.702255	-5.51179	3.55193175942266e-8	4.929637290608724e-6	2
RANBP10	0.5863740166948953	5.50757480537085	3.638108313403977e-8	4.986903284410415e-6	2
ADAMTS14	2.6125886559342506	5.50266488571658	3.740930808149014e-8	5.065311556448598e-6	2
SMU1	-0.447803	-5.48741	4.07867251043794e-8	5.456084443782224e-6	2
FHL2	2.1229837486955	5.478595656278484	4.2871480050166845e-8	5.6666909880595526e-6	2
ALDH18A1	0.8599167904369384	5.467166734859649	4.572858710064064e-8	5.973229442098976e-6	2
PTPRE	-0.872585	-5.45004	5.035828552028803e-8	6.501488885253e-6	2
SERPINB8	-0.671485	-5.44514	5.1763579053831155e-8	6.606103657869969e-6	2
CD302	-0.774386	-5.42195	5.895167315246519e-8	7.4379593978616025e-6	2
SLC4A8	0.8375005353853915	5.419469255761752	5.977622816071738e-8	7.457252373802754e-6	2
EYA2	2.0315754490862523	5.415734070872497	6.103776300976572e-8	7.530025363304763e-6	2
CFH	1.363047994576327	5.405924185923898	6.447506618476912e-8	7.866666591752654e-6	2
CXCL3	-1.46929	-5.40217	6.583881995551712e-8	7.945743673544637e-6	2
PYROXD1	-0.549404	-5.36553	8.071107116900431e-8	9.545717185559176e-6	2
LGMN	1.3771224822225845	5.365297813300421	8.081576289674526e-8	9.545717185559176e-6	2
SEC16B	1.1138139419998863	5.357212705705961	8.45156029503481e-8	9.87764989008121e-6	2
AKR1C2	-1.95256	-5.34693	8.945781632043512e-8	1.0346355568810324e-5	2
AMPH	-2.12865	-5.33219	9.703737131889454e-8	1.1107277667563774e-5	2
THBS1	-1.39744	-5.32488	1.0102215968543415e-7	1.1445398357014035e-5	2
CXCL8	-1.60164	-5.31648	1.0579264635233816e-7	1.1864805580303138e-5	2
NCK2	0.655162527281751	5.3126383363835155	1.0804934525710066e-7	1.188985295921182e-5	2
AATK	-1.23081	-5.31244	1.0816555407469646e-7	1.188985295921182e-5	2
HS6ST2	2.337704002718505	5.31066058993485	1.092285870340994e-7	1.188985295921182e-5	2
AHDC1	0.8453264240279537	5.304733429049777	1.1283776679476966e-7	1.2163473055556577e-5	2
GRPEL1	-0.831538	-5.30167	1.1474981581386439e-7	1.2250646201743619e-5	2
RILPL1	1.1734878670675641	5.292643368837023	1.2056088637655096e-7	1.2630238364633051e-5	2
ITGA6	0.9090920112100568	5.292613633108469	1.2058049776196555e-7	1.2630238364633051e-5	2
RNF168	-0.626912	-5.28539	1.2543900523949495e-7	1.30163483661132e-5	2
CLNK	1.4836281521580064	5.283228253645604	1.2692708553748298e-7	1.304880954372846e-5	2
CLSTN1	0.5410165029449819	5.278216084262362	1.3044758498152667e-7	1.3287702165595326e-5	2
SIGLEC10	-1.79399	-5.26951	1.367880062646762e-7	1.372018315445877e-5	2
RRN3	-0.542685	-5.26901	1.3716475998783423e-7	1.372018315445877e-5	2
TRMO	-0.629419	-5.26716	1.3854677953179738e-7	1.3734686545906662e-5	2
PSMD12	-0.55332	-5.26285	1.4184197433625513e-7	1.3936915407570272e-5	2
C15orf39	-0.784992	-5.25689	1.4651378873514088e-7	1.4269671897598853e-5	2
TAX1BP1	-0.429421	-5.25197	1.5047724791930034e-7	1.4528251162156449e-5	2
BTNL9	-2.06303	-5.24796	1.537928254155441e-7	1.4720359832661951e-5	2
HAAO	0.8543342228939766	5.232289274042903	1.674234675399563e-7	1.588805777859944e-5	2
ZMAT3	0.7966448675668791	5.229367880831287	1.7009060398960424e-7	1.600437267878454e-5	2
CNTN3	1.76275639865945	5.223824764908463	1.752646507453444e-7	1.631947906831994e-5	2
PFDN5	-0.561708	-5.22265	1.7637913070326873e-7	1.631947906831994e-5	2
NARS	-0.483655	-5.21698	1.818687420956552e-7	1.66583305627347e-5	2
CSF3R	-0.988131	-5.21424	1.8457086857630048e-7	1.66583305627347e-5	2
PTGDS	1.782400414081943	5.213283183613647	1.85527345336468e-7	1.66583305627347e-5	2
BDNF-AS	1.0009608899255025	5.212768726877024	1.8604278030974533e-7	1.66583305627347e-5	2
UBXN1	-0.609234	-5.20922	1.896372879438681e-7	1.684434246432614e-5	2
PXDC1	0.8810399355912802	5.2047146210235145	1.9429495632355937e-7	1.7121086508416506e-5	2
SLC19A3	-1.98653	-5.17865	2.234952718654447e-7	1.953911813796876e-5	2
USP15	-0.59828	-5.17158	2.32127709016586e-7	2.001097833016178e-5	2
SULT1B1	-1.41347	-5.17128	2.3249718135556782e-7	2.001097833016178e-5	2
GAS6	0.7835891518279158	5.166568234293239	2.384311834582427e-7	2.036385715336053e-5	2
WBP11	-0.45879	-5.15368	2.554267524825066e-7	2.164887963979596e-5	2
CHI3L1	2.966577997624502	5.1475468885498366	2.6391504807877193e-7	2.219885438498943e-5	2
VDR	-0.708891	-5.14433	2.6848274308381886e-7	2.24132623793958e-5	2
MARCKS	1.2699133032822476	5.1257043858547044	2.96427398693823e-7	2.4561443341026248e-5	2
SYAP1	-0.64302	-5.12424	2.987352886361505e-7	2.4569317849830953e-5	2
CD300E	-1.65065	-5.108	3.255801050124613e-7	2.6580264014362923e-5	2
KIF26B	1.7269768162151056	5.09971470276963	3.40165816240127e-7	2.7568328888424308e-5	2
SYF2	-0.617601	-5.09355	3.5141117627579406e-7	2.8273320943406822e-5	2
ACO1	-0.838105	-5.09064	3.5685206293965985e-7	2.850452125769096e-5	2
TENM4	1.7474165475445838	5.0826904648212	3.721258551134435e-7	2.951223835231831e-5	2
TAF9	-0.563349	-5.07945	3.785387637007376e-7	2.980791413737085e-5	2
PRPF38A	-0.413852	-5.07168	3.943091651481658e-7	3.0831089159437215e-5	2
GGNBP2	-0.397091	-5.06427	4.099600612690097e-7	3.183067524664206e-5	2
COL18A1	1.4258994590730314	5.05141677181548	4.385450161941234e-7	3.376936135311954e-5	2
IFNGR2	-0.486934	-5.05035	4.4101210449449096e-7	3.376936135311954e-5	2
MXD1	-1.00609	-5.04363	4.5677143797756544e-7	3.473652928674595e-5	2
CAMK1D	0.5283616751081083	5.041297776331583	4.6238530873853144e-7	3.492424546206744e-5	2
RBM7	-0.638129	-5.03873	4.6863993224980464e-7	3.507951503120873e-5	2
GHITM	-0.641655	-5.03786	4.707599513329821e-7	3.507951503120873e-5	2
SEMA6B	-1.39697	-5.03289	4.831381095062507e-7	3.5761882865652674e-5	2
IGFBP4	1.3542527573596332	5.030998215093349	4.879326912495736e-7	3.587759384731136e-5	2
GPATCH3	-0.53536	-5.01914	5.190266558806595e-7	3.791284842265106e-5	2
IKZF5	-0.497099	-5.01238	5.37611142945714e-7	3.901370274592328e-5	2
RBM34	-0.634286	-5.00883	5.476322109895593e-7	3.948285999101997e-5	2
RHOBTB3	0.7773596338841574	4.998489309274599	5.778120964554559e-7	4.13899852060963e-5	2
GLDN	-1.95545	-4.99448	5.899475359275121e-7	4.19883813551485e-5	2
ORMDL1	-0.539308	-4.99108	6.004408560336786e-7	4.2220808980401465e-5	2
PICK1	-0.681385	-4.99095	6.008185012071901e-7	4.2220808980401465e-5	2
COL14A1	2.628016685334723	4.986964399279192	6.13353619666641e-7	4.283059898841959e-5	2
ZNF330	-0.427005	-4.98262	6.272939948217641e-7	4.348163962706959e-5	2
ZDHHC14	0.6166721418825841	4.981629943236239	6.305092299340902e-7	4.348163962706959e-5	2
ARHGAP33	1.2312372528222335	4.956688653697128	7.170474171345663e-7	4.9144305385463515e-5	2
ST3GAL4	0.8302886436938895	4.952544901094362	7.324914722999794e-7	4.989480255795504e-5	2
TPST1	-1.14098	-4.95131	7.371732558109968e-7	4.990752841017986e-5	2
LRIF1	-0.685651	-4.94842	7.481708934102878e-7	5.0345099572935915e-5	2
CHIT1	4.478448775283501	4.945650184125826	7.589013463498475e-7	5.0382076195082815e-5	2
PSD3	0.6702302235975762	4.945059457219076	7.612062778086162e-7	5.0382076195082815e-5	2
HHAT	0.8047780856548258	4.944771191649795	7.623334955213828e-7	5.0382076195082815e-5	2
LRRC6	1.0927190193161114	4.941130635499895	7.76708440183513e-7	5.1028365747677783e-5	2
CDK11A	-0.682727	-4.93756	7.910472939587168e-7	5.145110850045613e-5	2
ST6GALNAC3	-1.06133	-4.93723	7.924110198665224e-7	5.145110850045613e-5	2
CALCOCO2	-0.474398	-4.92712	8.344954853828061e-7	5.35742064077111e-5	2
MAPK14	-0.419083	-4.92706	8.347597683989931e-7	5.35742064077111e-5	2
PAPPA	2.1288852676312233	4.9137457511611435	8.93526083494791e-7	5.7016207500245194e-5	2
KLHL42	0.4736307749442952	4.910490771077563	9.08487320654306e-7	5.76396269784272e-5	2
POSTN	2.5010868423264916	4.903487418393388	9.414997576770199e-7	5.9394726190272453e-5	2
RNF207	1.6984248657707186	4.889612175828905	1.0103483438582612e-6	6.337795289185466e-5	2
TM7SF3	0.44668048411739564	4.887758175443664	1.019906996563065e-6	6.361813136426804e-5	2
HNRNPA3	-0.329466	-4.88322	1.0436504920246339e-6	6.473548275390788e-5	2
ANKHD1	-0.319543	-4.87558	1.0848934193554073e-6	6.691984241723937e-5	2
ZNF326	-0.47732	-4.87277	1.1004530608713094e-6	6.720028457838795e-5	2
CROT	0.7007787246807069	4.872572380558964	1.1015447890900304e-6	6.720028457838795e-5	2
TFEB	0.8004555192768409	4.854038684884418	1.2097212174870588e-6	7.327806684759267e-5	2
ZNF618	0.9009919461421996	4.8524240179842835	1.219615163554092e-6	7.327806684759267e-5	2
ADIPOR1	-0.630726	-4.8522	1.220971121931428e-6	7.327806684759267e-5	2
MAP1LC3B	-0.699402	-4.84407	1.272068016672735e-6	7.555442527022844e-5	2
CD163	-1.15264	-4.84267	1.2810838543131807e-6	7.555442527022844e-5	2
SC5D	-0.773335	-4.84184	1.286422271635499e-6	7.555442527022844e-5	2
CHCHD6	0.5972734446644796	4.840989300129571	1.2919432962942321e-6	7.555442527022844e-5	2
PAPLN	1.2540545095302817	4.840838449282785	1.2929245070110243e-6	7.555442527022844e-5	2
C16orf87	-0.638558	-4.83828	1.3096996167686875e-6	7.613400442399338e-5	2
PALLD	0.9732220210287758	4.834602720123633	1.334118020045905e-6	7.6992049458493e-5	2
MUC5B	4.109304657294503	4.833975762697248	1.3383288791758218e-6	7.6992049458493e-5	2
SLC18B1	1.24800154028089	4.829310012211691	1.370069639649098e-6	7.841176911868007e-5	2
HPCAL1	-0.583652	-4.82708	1.3854889912884072e-6	7.888761164243685e-5	2
ACOT11	0.9205970371944404	4.825704376926359	1.3950931653251673e-6	7.90291806867619e-5	2
HMCN1	1.5485577665662362	4.822921932274159	1.4147035174468445e-6	7.973326474219449e-5	2
NDUFA6	-0.71564	-4.81714	1.4562700688038052e-6	8.166144734307399e-5	2
ARHGEF10	-0.622788	-4.81128	1.4996909367090138e-6	8.367371090593056e-5	2
TNFRSF21	0.9487810705908517	4.809667880024547	1.5118127732753146e-6	8.39282861083791e-5	2
SDR39U1	-0.459217	-4.80433	1.5527259680467864e-6	8.57707284737486e-5	2
TRIM47	0.8394608461328601	4.792219904187096	1.6494596287113285e-6	9.026912740467886e-5	2
DCTN6	-0.610039	-4.79133	1.6568076813707372e-6	9.026912740467886e-5	2
ZNF793	1.251192468960927	4.791117216394635	1.6585519220530024e-6	9.026912740467886e-5	2
ARID3B	-0.581956	-4.78016	1.7515338827231897e-6	9.486478390183208e-5	2
CP	2.7094761312524973	4.776065725113561	1.7875798854287194e-6	9.634708479570424e-5	2
CTSF	1.0844892840488973	4.774690722217601	1.7998364070272204e-6	9.653905133924265e-5	2
TMEM45A	2.066102442979865	4.773208505386567	1.8131390477803619e-6	9.670253439505209e-5	2
IFT27	0.7374793650890342	4.772414546932092	1.8203034935212002e-6	9.670253439505209e-5	2
MTRR	-0.523226	-4.76744	1.8658467252059664e-6	9.864998185696117e-5	2
CD24	1.5480948041562808	4.766376682922496	1.8756844219069286e-6	9.870011439067597e-5	2
CDK6	0.6561150594453604	4.7637428474040835	1.900346563833445e-6	9.894239449370307e-5	2
GLT1D1	-1.12078	-4.7637	1.9007862179353325e-6	9.894239449370307e-5	2
BCAS2	-0.79493	-4.76304	1.907022644479191e-6	9.894239449370307e-5	2
PDE3A	1.6045527633222145	4.7578280601805325	1.9568706720972243e-6	1.0105644219672317e-4	2
RIOK3	-0.463186	-4.7537	1.99722841363905e-6	1.0266308831775173e-4	2
SUMO3	-0.599397	-4.75173	2.016842518779067e-6	1.0319355984333633e-4	2
HNRNPA2B1	-0.430325	-4.74996	2.0345921158410917e-6	1.0362420303753963e-4	2
SLC22A15	-0.62789	-4.74784	2.0559850391743866e-6	1.0423562506827952e-4	2
ATP2B4	0.5810840583147693	4.743346277135021	2.102164771712005e-6	1.0609243391053814e-4	2
ZNF668	-0.752147	-4.74125	2.1239878708187964e-6	1.0670876619774252e-4	2
TBRG1	-0.359095	-4.73704	2.168629689184479e-6	1.0846079026583456e-4	2
FRMD4B	0.5549372769529991	4.735858068573131	2.181302091257904e-6	1.0860536824769734e-4	2
AGTPBP1	-0.529811	-4.73361	2.205578460223912e-6	1.0909891446446275e-4	2
IL18RAP	-1.85357	-4.73313	2.2108669507794398e-6	1.0909891446446275e-4	2
ADAM12	1.4279923245679655	4.731004693243333	2.234113555989467e-6	1.0975824253164183e-4	2
CHL1	2.1791888004453224	4.726413381257414	2.2852020449369857e-6	1.1177356081469318e-4	2
EREG	-1.31053	-4.7241	2.311377582747374e-6	1.1255800570721092e-4	2
TMEM39A	-0.57679	-4.72195	2.335978481185594e-6	1.1325925360962293e-4	2
SOX4	1.1182966310755096	4.71814063392911	2.380099466282464e-6	1.148967146701487e-4	2
KCNA3	-1.5183	-4.7116	2.4577715575969944e-6	1.1813263032034384e-4	2
UQCRFS1	-0.636877	-4.70581	2.528631786795654e-6	1.2090112733600855e-4	2
COL1A1	1.817687397632718	4.705121445168983	2.537148758830045e-6	1.2090112733600855e-4	2
RPL36A	-0.790602	-4.69898	2.614582968619411e-6	1.240586098315441e-4	2
LONRF3	-0.739938	-4.69238	2.700437934729602e-6	1.2758707399703308e-4	2
HCLS1	-0.609566	-4.69021	2.7292704941402426e-6	1.2840292498491148e-4	2
IFNGR1	-0.535281	-4.68848	2.75240888565385e-6	1.2884484649498007e-4	2
GALNS	0.5837703163270082	4.687778077567137	2.7618727790511805e-6	1.2884484649498007e-4	2
HELLS	0.7417311157159845	4.683388413028883	2.8217109438221065e-6	1.3076205163183984e-4	2
HSDL2	-0.505504	-4.68304	2.8265236775323392e-6	1.3076205163183984e-4	2
SLC35F2	1.339775702984042	4.681995778279627	2.840953335038766e-6	1.3086537865544926e-4	2
BACH1	-0.55177	-4.68053	2.861278974291583e-6	1.3086537865544926e-4	2
BTG1	-0.733305	-4.67958	2.874657230348063e-6	1.3086537865544926e-4	2
RPL36AL	-0.511815	-4.67866	2.887625781850231e-6	1.3086537865544926e-4	2
TTN	-1.45056	-4.67865	2.8876896127699783e-6	1.3086537865544926e-4	2
ACAA2	-0.557636	-4.67198	2.983111201853919e-6	1.3464017753733357e-4	2
NCS1	1.5385209136131857	4.669215155190818	3.023525979337264e-6	1.3540818262201617e-4	2
C3orf67	1.180856136720596	4.6691477183693735	3.0245185346536982e-6	1.3540818262201617e-4	2
PPP1R2	-0.528979	-4.66666	3.0614187784465115e-6	1.3650976986783782e-4	2
IL18R1	-1.23448	-4.6624	3.125438398922371e-6	1.3880697017294033e-4	2
CCNK	-0.443914	-4.66025	3.1583156264971842e-6	1.3970828048206468e-4	2
UTP23	-0.471271	-4.6573	3.203764203088832e-6	1.4092596702481203e-4	2
CHRM3	-1.58227	-4.65683	3.2112284659351024e-6	1.4092596702481203e-4	2
BPIFB1	3.4660306388130353	4.652698982935652	3.276183369910102e-6	1.4293252349741132e-4	2
EAPP	-0.496072	-4.65229	3.2826977836476524e-6	1.4293252349741132e-4	2
GPR161	0.9363456188554492	4.651335588469761	3.297921457525973e-6	1.4303446071449563e-4	2
ATP6V1G1	-0.543654	-4.64881	3.338596806789652e-6	1.4415340012572165e-4	2
APP	0.5807318380039611	4.648123270334566	3.3496872225917486e-6	1.4415340012572165e-4	2
CYP2R1	-0.725975	-4.64395	3.418138496448887e-6	1.4653124218560613e-4	2
RPL17	-0.766192	-4.64209	3.4490455782349452e-6	1.4728751175054845e-4	2
EPHA3	1.9972162150546622	4.638304715502193	3.5127862654486506e-6	1.4943473526925812e-4	2
MKRN1	-0.378676	-4.63694	3.5359680983605097e-6	1.498467702141097e-4	2
TXNRD1	-0.590047	-4.63393	3.587807820635119e-6	1.5146551419205982e-4	2
UBE2B	-0.432946	-4.62009	3.835706003564665e-6	1.6131758999082753e-4	2
EIF1	-0.614763	-4.61903	3.8554024744068425e-6	1.6153408933335537e-4	2
INPP5K	-0.481223	-4.61357	3.9581112499560155e-6	1.6521394439196105e-4	2
CDK2AP1	0.6112763235769684	4.609245227746694	4.041334287233974e-6	1.6805593479834763e-4	2
ZNF394	-0.439225	-4.60796	4.066412747567897e-6	1.6846783856808343e-4	2
LUCAT1	-0.981261	-4.60363	4.151988534162735e-6	1.7137371262010724e-4	2
DNAH14	0.9098880048809689	4.600793125067213	4.208852786833524e-6	1.7207862587154466e-4	2
EEF2K	0.678199033570498	4.600524850991751	4.21427737266627e-6	1.7207862587154466e-4	2
CLDN1	2.0043429136284314	4.600190496512315	4.221047503436617e-6	1.7207862587154466e-4	2
DUBR	0.7904440930838275	4.599696927824454	4.231060511837493e-6	1.7207862587154466e-4	2
TOM1	-0.516611	-4.59701	4.286068520766908e-6	1.7295496156959753e-4	2
EIF3M	-0.396855	-4.59681	4.289995418691497e-6	1.7295496156959753e-4	2
DTNB	0.4664143354579402	4.595985445338781	4.307087650566896e-6	1.7295496156959753e-4	2
NFE2L1	0.5247098578790593	4.595122807308187	4.324944744665023e-6	1.7295496156959753e-4	2
G3BP2	-0.50588	-4.59486	4.33049439938288e-6	1.7295496156959753e-4	2
RTN4RL1	1.2602985261140733	4.59189209788298	4.392454650330189e-6	1.7419055940588583e-4	2
TRPV4	1.089598933724488	4.591875273446465	4.392808847486988e-6	1.7419055940588583e-4	2
SESN2	-0.814506	-4.58954	4.442167684325112e-6	1.7552095302157195e-4	2
UBXN2B	-0.704077	-4.58825	4.469858488857648e-6	1.7594830011610863e-4	2
NOTCH3	1.0405054454144307	4.587554813349637	4.4846770181805585e-6	1.7594830011610863e-4	2
MAN2A2	-0.618811	-4.58454	4.54992478963903e-6	1.7787963006817657e-4	2
CHD1L	-0.789222	-4.57895	4.673172695871154e-6	1.8205696997283309e-4	2
CCNH	-0.801835	-4.57819	4.690183940431529e-6	1.8208081220493448e-4	2
ENPP3	1.3568925326285233	4.575295242064522	4.755488706372104e-6	1.839661660172562e-4	2
YARS	-0.482278	-4.57457	4.771886500312509e-6	1.839661660172562e-4	2
SUOX	0.6949128263719634	4.573104777184945	4.805496762723929e-6	1.8440723009085214e-4	2
DENND5B	0.6365304134704822	4.572623794617353	4.816544783062877e-6	1.8440723009085214e-4	2
ENAH	1.2383125830939656	4.57102859463524	4.853360433836106e-6	1.8517821614048898e-4	2
CRBN	-0.387639	-4.5702	4.872705782763094e-6	1.852796311849953e-4	2
CLEC4E	-1.20676	-4.56774	4.930084774826865e-6	1.8682160837850742e-4	2
ALDH7A1	0.7658789836202813	4.559641958727316	5.124090885129783e-6	1.931008692746767e-4	2
ABCD4	0.4704621721960355	4.559020102747293	5.139285225946008e-6	1.931008692746767e-4	2
DPYD	-0.717115	-4.55867	5.147965172052986e-6	1.931008692746767e-4	2
ICMT	0.4093525624869458	4.556646683605068	5.1976745355327234e-6	1.9430902480814755e-4	2
C9orf72	-0.533509	-4.55051	5.3517299529743295e-6	1.9939683781165766e-4	2
CASP8	-0.541524	-4.54938	5.38044521075987e-6	1.9979626479955465e-4	2
CBWD2	-0.568968	-4.54548	5.480949964980251e-6	2.0218738735942909e-4	2
COX4I1	-0.515998	-4.54547	5.481257641645335e-6	2.0218738735942909e-4	2
SEMA4D	-0.552696	-4.54369	5.5278886240965925e-6	2.0276332637177735e-4	2
ZNF630	0.8056604228747497	4.543476590612322	5.533395288719133e-6	2.0276332637177735e-4	2
LTBP3	0.6097161384378363	4.542581900385818	5.556939612461334e-6	2.0295625170117825e-4	2
PRPF40A	-0.309695	-4.5399	5.628004544988958e-6	2.0487781791151606e-4	2
PDE7B	1.0214737199458532	4.537540709171773	5.691404627383074e-6	2.0571058473351094e-4	2
MRPL32	-0.466796	-4.53743	5.694363472223823e-6	2.0571058473351094e-4	2
LIN7A	-0.843628	-4.53698	5.7064631268955575e-6	2.0571058473351094e-4	2
YTHDC1	-0.399608	-4.53426	5.780491882228487e-6	2.0770485879735565e-4	2
H2AFZ	-0.71127	-4.53189	5.845860590795749e-6	2.093760972245329e-4	2
SPATA2L	-0.736549	-4.53035	5.8886429727924945e-6	2.1023023449168833e-4	2
GALM	0.7162190011723979	4.525796524764513	6.016845053030549e-6	2.1386579589554252e-4	2
METTL9	-0.577266	-4.52537	6.02900064084525e-6	2.1386579589554252e-4	2
NUP214	-0.364495	-4.52316	6.092237822172505e-6	2.1542075331076852e-4	2
SARAF	-0.633187	-4.52138	6.143736152575638e-6	2.165520714350708e-4	2
PAK3	1.1476447605037465	4.515374931614046	6.320484027832959e-6	2.2207700683870047e-4	2
SPRY1	1.0208347888514206	4.514092442702418	6.358847779731688e-6	2.2272014794435626e-4	2
BNC2	0.9110199652594552	4.513194144030149	6.385851625669872e-6	2.2296261194909618e-4	2
SPTAN1	0.4012725363770214	4.5099004756092995	6.48580465353678e-6	2.2574259895993376e-4	2
HCCS	-0.553122	-4.50808	6.541543591796162e-6	2.2697112031160244e-4	2
SERPINF1	1.1294258364419132	4.500007185966155	6.795116535929012e-6	2.3503482522872218e-4	2
EMID1	1.5169674427859938	4.498360309888003	6.847956848153671e-6	2.3587743226540487e-4	2
POLE3	-0.449587	-4.49793	6.861966191274951e-6	2.3587743226540487e-4	2
TMEM167B	-0.528935	-4.49575	6.9323646424205935e-6	2.365974756583941e-4	2
ARL6IP1	-0.75024	-4.49549	6.940916261060706e-6	2.365974756583941e-4	2
PSMD5	-0.48286	-4.49531	6.946841129842068e-6	2.365974756583941e-4	2
UBXN4	-0.366836	-4.4896	7.135615363592993e-6	2.4228360055649235e-4	2
NDEL1	-0.510286	-4.48693	7.2256867455375515e-6	2.445939022429983e-4	2
CSGALNACT2	-0.601348	-4.48209	7.3914504745602505e-6	2.4944460370529624e-4	2
IRS2	-0.608915	-4.47852	7.516284732092368e-6	2.5270296834715555e-4	2
MEG3	2.033038996410738	4.4780294546554895	7.533520897316805e-6	2.5270296834715555e-4	2
DCLK1	1.7528162182042522	4.476366719082381	7.5924028257812955e-6	2.539109896826799e-4	2
TPCN1	0.9565863294226008	4.475064016123372	7.638842206902941e-6	2.5469689196169174e-4	2
SAMSN1	-1.11088	-4.47289	7.716990549688057e-6	2.5653217387181583e-4	2
PIK3R6	0.868269736681433	4.472183644371811	7.742489120051227e-6	2.5661151253710083e-4	2
MAN1C1	0.681977705147459	4.462603409383028	8.09698309874184e-6	2.6687365843372805e-4	2
NFE2L3	0.8569631183720027	4.462518554669566	8.100191199870878e-6	2.6687365843372805e-4	2
PSMA1	-0.413453	-4.46098	8.158430617108624e-6	2.6787467401089953e-4	2
WBP1L	0.4338773990340453	4.460448612985339	8.178826847671344e-6	2.6787467401089953e-4	2
CCDC28A	-0.529626	-4.45453	8.407724940785562e-6	2.7456167652218266e-4	2
LDLRAD3	-0.735444	-4.45033	8.57381753210305e-6	2.791645045716721e-4	2
CSRNP3	1.8398296322967451	4.4490853523530625	8.623674360647788e-6	2.7996683165576724e-4	2
HTRA4	1.1250000485928182	4.4468160436636675	8.715240887082385e-6	2.821146343127572e-4	2
SH3RF3	1.0172456652169355	4.44425145005983	8.81984043472489e-6	2.8423420146557026e-4	2
BTN2A1	-0.420351	-4.44396	8.831919256563249e-6	2.8423420146557026e-4	2
C9orf78	-0.517608	-4.44316	8.86469583460916e-6	2.84464502461461e-4	2
HOMER2	0.9276409341556858	4.442338719032915	8.898632991568075e-6	2.845405387897317e-4	2
CCDC59	-0.413237	-4.44186	8.918320048529823e-6	2.845405387897317e-4	2
PELO	-0.932916	-4.43954	9.015062758001725e-6	2.868029851062841e-4	2
TREM2	1.0188594044302097	4.43757591443813	9.097764031610762e-6	2.886070686942123e-4	2
RAD23A	-0.528034	-4.43602	9.16357189702872e-6	2.898664922299427e-4	2
VSIG4	-0.850264	-4.4337	9.262875371391266e-6	2.9217529900158303e-4	2
ITGB3	1.2849311136806507	4.426775446293947	9.56522164158763e-6	3.008573821148653e-4	2
NFIC	0.44146078113779175	4.419101040677682	9.91123045628481e-6	3.108598637178821e-4	2
PROM1	2.31244491245527	4.41073537522071	1.0302015488245586e-5	3.222064168056077e-4	2
MGP	1.3085544805020715	4.4038076224454015	1.0636727502044356e-5	3.312447800487142e-4	2
MAP2K3	-0.523386	-4.40352	1.0650669771898675e-5	3.312447800487142e-4	2
ARHGEF1	-0.409353	-4.40204	1.0723856495256534e-5	3.314973746245156e-4	2
PLA2R1	1.0840354312405815	4.401577176609025	1.0746682846701458e-5	3.314973746245156e-4	2
SP100	-0.421165	-4.40154	1.074836124154063e-5	3.314973746245156e-4	2
ECHDC1	-0.568743	-4.39948	1.0850856345714154e-5	3.337314626217846e-4	2
IGFBP7	1.022205324400329	4.396184253787351	1.1017042514195392e-5	3.3790669346715866e-4	2
SLC12A4	0.560021773743029	4.39497884321714	1.1078354292766558e-5	3.3885115072338043e-4	2
FCN3	-1.88256	-4.38931	1.1370924407703358e-5	3.468444332382703e-4	2
SLC25A29	0.8008502100252198	4.38861	1.1407839165158532e-5	3.470170910979594e-4	2
MORF4L1	-0.364971	-4.38204	1.175757021131584e-5	3.5630944066483147e-4	2
SUGCT	0.9136050465707298	4.3816665111787305	1.1777498398990646e-5	3.5630944066483147e-4	2
ZRANB2	-0.378923	-4.38069	1.1830540493105455e-5	3.5694155188845073e-4	2
COL3A1	1.6238883082728583	4.38001998301518	1.1866842606496495e-5	3.5706654054181727e-4	2
DIP2C	0.8073584710341	4.378939102546829	1.19258448527313e-5	3.5787204162128543e-4	2
TRAK1	0.5245364747289105	4.376958538167796	1.2034685632872368e-5	3.6016472933094856e-4	2
IVNS1ABP	-0.496696	-4.37398	1.2200014839301929e-5	3.641310880665842e-4	2
FAXC	1.651725099292824	4.371387423549113	1.234595017470046e-5	3.6749888683565473e-4	2
PPARA	0.40462469244073784	4.369661748909263	1.244391386878927e-5	3.6942453391755956e-4	2
SETMAR	0.6803150530726754	4.364856876162762	1.2720601780243923e-5	3.7663157750946207e-4	2
LINC01094	0.9468285457692476	4.361459226345951	1.2919787519664897e-5	3.811071853718957e-4	2
CBFA2T3	0.9184845166715483	4.360767217640472	1.2960719372344492e-5	3.811071853718957e-4	2
ZNF350	-0.528008	-4.36036	1.2984648952916549e-5	3.811071853718957e-4	2
CTNND1	0.4805873319163538	4.359952588301431	1.3009062708812798e-5	3.811071853718957e-4	2
PRSS23	0.9648495524075623	4.35900062906578	1.3065773735699684e-5	3.8176127838808845e-4	2
ARMT1	-0.506598	-4.35809	1.3119985097126937e-5	3.823390932635181e-4	2
PYM1	-0.477528	-4.35742	1.3160291455448334e-5	3.8250972782681374e-4	2
RSL24D1	-0.515129	-4.35477	1.3320669900745315e-5	3.861603078537213e-4	2
MIS12	-0.461964	-4.3471	1.3795177235927744e-5	3.98874616798192e-4	2
ARHGAP22	0.6341320459696624	4.339911974030395	1.4253980277304887e-5	4.110699818673147e-4	2
DBF4	-0.529034	-4.33784	1.4389047346834514e-5	4.137088573294673e-4	2
AGFG1	-0.736193	-4.33737	1.4420006105242172e-5	4.137088573294673e-4	2
GPT2	0.9164973801553798	4.335768399926659	1.4525181735468445e-5	4.156523010538818e-4	2
AP1S3	0.7066854967305511	4.333895114613056	1.46493990249151e-5	4.1812924774712684e-4	2
PLEKHH3	1.0952742358735281	4.324826828102041	1.5265173089621006e-5	4.3458773542067185e-4	2
TSG101	-0.397634	-4.32321	1.537783736663218e-5	4.366755199020897e-4	2
PGM2L1	0.8136265276663115	4.321525866097134	1.5495388241661188e-5	4.388910603243984e-4	2
TNFSF15	1.4114956871411959	4.320238893523742	1.5586037773489834e-5	4.403353114479838e-4	2
BACE2	1.163058937281984	4.316943223969352	1.5820483045073648e-5	4.4505416164577826e-4	2
TMED5	-0.601151	-4.31677	1.583323370711361e-5	4.4505416164577826e-4	2
MAP3K8	-0.664877	-4.31462	1.598759724491592e-5	4.482583136623774e-4	2
RCHY1	-0.406417	-4.31394	1.603680865613993e-5	4.485055075796515e-4	2
WNT5B	1.2439141817665453	4.312536738115449	1.6139205417983576e-5	4.5023517024088357e-4	2
NOL3	0.7677026178571879	4.306293799703036	1.660125339417282e-5	4.619642015927339e-4	2
CHURC1	-0.423763	-4.30246	1.6890961480298257e-5	4.688508632893789e-4	2
NR1H2	-0.523219	-4.30007	1.7074378064492384e-5	4.7186719760199683e-4	2
TBXAS1	-0.780639	-4.29994	1.7084626986940713e-5	4.7186719760199683e-4	2
NFKBIA	-0.829439	-4.2979	1.724239629838188e-5	4.750429928062878e-4	2
LINC00342	0.9256602824522323	4.295702005910369	1.741413790801527e-5	4.7858706235815227e-4	2
HSCB	0.37834500643200886	4.293425454766842	1.7593740357896143e-5	4.817921746257295e-4	2
TXNIP	-0.570679	-4.29313	1.7617546870039285e-5	4.817921746257295e-4	2
HAL	-1.02022	-4.29229	1.7683623612345844e-5	4.824109900930612e-4	2
WEE1	1.160270741393507	4.289582651198214	1.7900918731310075e-5	4.853528175962821e-4	2
FAM155A	1.7454904723828055	4.289477494650556	1.7909395929397565e-5	4.853528175962821e-4	2
POLR3F	-0.392264	-4.28914	1.7936621634656825e-5	4.853528175962821e-4	2
SERINC5	0.45219937771137686	4.288772646063226	1.796631613366405e-5	4.853528175962821e-4	2
ZBTB7C	1.1634392484394307	4.286179374221078	1.8177223527482272e-5	4.898585262758147e-4	2
LDHB	-0.741611	-4.28501	1.827286165466118e-5	4.912435422559396e-4	2
ATP6V0D2	1.847581503388095	4.283869545356735	1.8367063067938786e-5	4.921690306649253e-4	2
USP14	-0.39839	-4.28352	1.8395942333238224e-5	4.921690306649253e-4	2
IL1A	-1.87362	-4.28043	1.8653298331330223e-5	4.968857505035393e-4	2
ECM2	1.401374290792231	4.279700600740579	1.871448951034187e-5	4.968857505035393e-4	2
CROCC2	1.3777312354894768	4.279359822204348	1.8743163986858123e-5	4.968857505035393e-4	2
STEAP1B	1.122428417680384	4.279263813908694	1.875125006403521e-5	4.968857505035393e-4	2
TBK1	-0.427548	-4.27826	1.8836327697885257e-5	4.97951777213381e-4	2
CMYA5	1.1798444932317869	4.277081816910556	1.8935922165922343e-5	4.993955909934341e-4	2
GPX4	-0.631012	-4.27487	1.912450532346651e-5	5.031738924323429e-4	2
COX6B1	-0.456081	-4.27238	1.933990618470197e-5	5.07638246734624e-4	2
NNT-AS1	0.39309809953824243	4.270212539189831	1.9528677671147832e-5	5.113842174121566e-4	2
CNKSR3	0.981782544551014	4.265941246073319	1.990611658232787e-5	5.195881954158658e-4	2
SCRN1	0.5941852468215127	4.2656112507686395	1.9935564374237487e-5	5.195881954158658e-4	2
LRRC4C	1.331225750110938	4.264892705570381	1.999982876551882e-5	5.20042385909966e-4	2
FPR3	0.8807180632575629	4.263943304682822	2.0085042723928482e-5	5.210379190742475e-4	2
RBM39	-0.327159	-4.26107	2.0345457285838653e-5	5.265631987055164e-4	2
STX3	-0.339974	-4.25749	2.0673655911133723e-5	5.33813026933297e-4	2
AFAP1	0.9144964778529285	4.255571827743603	2.085154091209813e-5	5.362856617954025e-4	2
MOB3A	-0.479541	-4.25542	2.086601872427397e-5	5.362856617954025e-4	2
PSMA7	-0.597863	-4.25397	2.1001137795070165e-5	5.385118543618107e-4	2
EIF5	-0.552137	-4.25148	2.123620632015323e-5	5.432847897987588e-4	2
LEPROT	-0.448362	-4.25063	2.1316783760308556e-5	5.434383326195518e-4	2
KANSL2	-0.395615	-4.25039	2.134009844385523e-5	5.434383326195518e-4	2
DNAJB9	-0.68501	-4.24947	2.142788051434025e-5	5.443882683273327e-4	2
GTF2H2	-0.574623	-4.24897	2.1475462625179837e-5	5.443882683273327e-4	2
LLPH	-0.485014	-4.24828	2.1542241629027725e-5	5.448371499022661e-4	2
WDR78	1.1535078940611156	4.243444466554435	2.201148623218091e-5	5.541936891385286e-4	2
GPR132	-0.826644	-4.24344	2.2012016293802677e-5	5.541936891385286e-4	2
ASF1A	-0.468316	-4.24117	2.223549549140497e-5	5.585536344820574e-4	2
C11orf58	-0.309246	-4.23802	2.2550122286606618e-5	5.651783470613845e-4	2
FAM102A	0.722252359895475	4.23704709537219	2.2647864515533866e-5	5.663496389999381e-4	2
ANKH	0.648855417883004	4.2334724155337895	2.301104185072266e-5	5.741384217271318e-4	2
SDS	1.5682440453658084	4.2318546294153565	2.3177219837552806e-5	5.769880534895713e-4	2
LINC01089	-0.582807	-4.22746	2.3634639585927227e-5	5.870590678356824e-4	2
PSMB6	-0.590793	-4.22274	2.4135311397911138e-5	5.981570590424272e-4	2
TWISTNB	-0.71296	-4.2209	2.4333295793185636e-5	6.017206752600003e-4	2
RIMS1	2.288151538991717	4.2203670187003155	2.43904900956061e-5	6.017946922922545e-4	2
SNRPA1	-0.451629	-4.21879	2.456220898554628e-5	6.046878189945018e-4	2
DCP2	-0.364735	-4.21688	2.477026723473267e-5	6.084607900602584e-4	2
PTPRN2	0.9991346338233089	4.214771120182392	2.500316263723922e-5	6.123135272976975e-4	2
FAM160B1	-0.388561	-4.21446	2.5037408033248195e-5	6.123135272976975e-4	2
CAPN13	2.7633537880323296	4.213331527339964	2.5163129501922616e-5	6.140356634282347e-4	2
SPTLC3	1.1228895354142732	4.211109658149752	2.5411934713490962e-5	6.18747173517303e-4	2
SKA2	0.6943358765996079	4.207104026610864	2.5866409043088723e-5	6.284348787864642e-4	2
WDR83OS	-0.474125	-4.20592	2.6002110036926398e-5	6.287184383812993e-4	2
GCA	-0.726868	-4.20582	2.601385733057394e-5	6.287184383812993e-4	2
RBM48	-0.501226	-4.20552	2.604795835858756e-5	6.287184383812993e-4	2
ANK2	0.9200528124215743	4.204317168671698	2.618715152516571e-5	6.307070355399455e-4	2
GPR155	0.6173405444706048	4.203204906790873	2.6316216028592726e-5	6.324436072845563e-4	2
HPGD	-1.10342	-4.19764	2.6971292673103553e-5	6.46786744167319e-4	2
CCDC80	1.6548709594559232	4.197142531176033	2.7030383003299933e-5	6.468067725983603e-4	2
DPH3	-0.88275	-4.19192	2.7660848597653067e-5	6.604696816768646e-4	2
SYNPO	1.0509072504484123	4.189539357385066	2.795212999861615e-5	6.659924879284015e-4	2
CGGBP1	-0.419949	-4.186	2.839102993610515e-5	6.750012963181488e-4	2
SPCS3	-0.433631	-4.17997	2.9154307484131793e-5	6.916672564023831e-4	2
COMMD2	-0.579477	-4.17607	2.9659236831538083e-5	7.003395792462255e-4	2
TALDO1	-0.602931	-4.17578	2.9696424917994926e-5	7.003395792462255e-4	2
ERN2	2.9294398587905217	4.17568490037361	2.9709082394395407e-5	7.003395792462255e-4	2
ATG5	-0.351785	-4.17352	2.999253177413895e-5	7.042493732897693e-4	2
CELSR1	1.2888223175635147	4.173452698999648	3.0001797132852462e-5	7.042493732897693e-4	2
PLEKHO1	0.7733730802772002	4.172497332287416	3.01279128112892e-5	7.043691222004476e-4	2
VCPKMT	-0.388829	-4.17244	3.013519055064677e-5	7.043691222004476e-4	2
ACSF2	0.5464644383094125	4.1719739465656644	3.01972171635966e-5	7.043691222004476e-4	2
SUN2	-0.55501	-4.17061	3.037886092610794e-5	7.071205301102232e-4	2
SNU13	-0.453781	-4.16882	3.061853404474952e-5	7.112083336796107e-4	2
ARNTL	-0.510288	-4.1666	3.091814934164893e-5	7.166685013368018e-4	2
NECAP1	-0.404431	-4.16452	3.1200770542527095e-5	7.208695221412495e-4	2
DDX20	-0.555533	-4.16431	3.122923895793398e-5	7.208695221412495e-4	2
WNT5A	1.0901226626536422	4.157085436806208	3.2233346968024686e-5	7.425038410497471e-4	2
MRPS31	0.5410365050879316	4.153948492009859	3.2678676525346135e-5	7.497106025956962e-4	2
NHS	1.1931043786381434	4.153930474370016	3.268125116241709e-5	7.497106025956962e-4	2
RSL1D1	-0.463019	-4.1533	3.277136182642383e-5	7.5022769146141e-4	2
CXCL2	-0.766527	-4.15047	3.317975469469655e-5	7.58014025463407e-4	2
BLVRB	-0.631718	-4.14857	3.34565074941851e-5	7.626492772187061e-4	2
EDRF1	-0.343838	-4.14813	3.3520025874333835e-5	7.626492772187061e-4	2
SCARB1	0.6805332786308353	4.14309629114893	3.4264799022514076e-5	7.767025851668644e-4	2
CHEK2	0.5276351797779324	4.143010619358332	3.427760665871958e-5	7.767025851668644e-4	2
ZNF780A	-0.528947	-4.14062	3.4636977222591494e-5	7.832471651780721e-4	2
NCOR1	-0.307765	-4.13789	3.505131208614423e-5	7.884151497195681e-4	2
NAE1	-0.340439	-4.13776	3.507181396499133e-5	7.884151497195681e-4	2
FBLIM1	0.9144450312469853	4.13771254846087	3.507854489430484e-5	7.884151497195681e-4	2
HMGB1	-0.40395	-4.1364	3.527979809409762e-5	7.910923162624889e-4	2
SEL1L	-0.388555	-4.13601	3.534015931425691e-5	7.910923162624889e-4	2
GPN2	-0.412196	-4.13535	3.5441869152033455e-5	7.911110259018564e-4	2
CTPS2	0.4232456546417621	4.135077419975398	3.548349913528997e-5	7.911110259018564e-4	2
NSUN4	-0.418998	-4.13336	3.575015906837855e-5	7.954589501727596e-4	2
SRGAP1	0.7554693842063834	4.13270625776337	3.5851679274266555e-5	7.961223899643631e-4	2
SOGA1	0.5094598902627212	4.130519019591745	3.619451470893635e-5	8.021311313639127e-4	2
CYTH1	-0.355818	-4.12886	3.645583768434044e-5	8.036517705653909e-4	2
RPS27	-0.48756	-4.12876	3.6473026448391764e-5	8.036517705653909e-4	2
TWSG1	0.5919687517497186	4.12871089266128	3.648027491353301e-5	8.036517705653909e-4	2
TXK	-0.813741	-4.12795	3.6601447465052943e-5	8.047244974346195e-4	2
CITED2	-0.842449	-4.12688	3.67710347041519e-5	8.068553326486138e-4	2
SPP1	2.428467807629059	4.126139882026151	3.689029351277079e-5	8.078755993536372e-4	2
TRMT6	-0.730811	-4.12539	3.701070215684394e-5	8.089169804083431e-4	2
SLC4A7	0.46287448413668825	4.118373198705919	3.815564235197558e-5	8.323027446640174e-4	2
TET1	1.095039105010039	4.117698194181741	3.826753888410557e-5	8.331068318239689e-4	2
FGF13	0.994557715408844	4.116336298481409	3.8494251353768495e-5	8.364024907649543e-4	2
TERF2IP	-0.392153	-4.11543	3.864534987473318e-5	8.380455462093018e-4	2
ANP32E	-0.496963	-4.11213	3.920223849953831e-5	8.454587210754425e-4	2
CHRNE	-0.968205	-4.11187	3.9246211643976104e-5	8.454587210754425e-4	2
ETF1	-0.430223	-4.11164	3.92863214554719e-5	8.454587210754425e-4	2
VGLL3	-1.22574	-4.11161	3.929178601053124e-5	8.454587210754425e-4	2
KIAA1522	0.8094857389927674	4.108927449871877	3.975009164132032e-5	8.536658945717205e-4	2
RPL41	-0.476947	-4.10548	4.0348059641966374e-5	8.634912945954095e-4	2
ABHD4	-0.509554	-4.10539	4.036314346528123e-5	8.634912945954095e-4	2
MUC4	2.139507457077986	4.1036268948426455	4.067232030685721e-5	8.684322545519915e-4	2
BIN1	-0.558748	-4.10206	4.094793981748806e-5	8.726391090087714e-4	2
KCNE1	-0.593505	-4.09932	4.143709381084578e-5	8.813717482410358e-4	2
ING3	-0.41282	-4.09631	4.197898125560076e-5	8.908735073132516e-4	2
HUS1	-0.502535	-4.09595	4.204428693435502e-5	8.908735073132516e-4	2
RELT	-0.711013	-4.09348	4.2495387746956795e-5	8.979553588388952e-4	2
RASAL2	0.6657512165041523	4.0932315039018246	4.254026107802025e-5	8.979553588388952e-4	2
LINC00665	0.7302478669524188	4.092369972429237	4.269866798132667e-5	8.995888246616129e-4	2
KLHL22	0.48667361900259515	4.090270887193219	4.308696568116854e-5	9.060503408295725e-4	2
BFAR	-0.330814	-4.08631	4.382845517717884e-5	9.199004495883113e-4	2
SRPRA	-0.392184	-4.08524	4.403077136729408e-5	9.213709573291847e-4	2
S100A8	-1.65863	-4.08506	4.406448512490292e-5	9.213709573291847e-4	2
ST5	0.7506824628754739	4.084169694989768	4.423469745817315e-5	9.231914396204821e-4	2
TIMM10B	-0.462869	-4.08292	4.447282866569519e-5	9.264199187152227e-4	2
FRAS1	1.4923127303590331	4.081765173235796	4.469494407774613e-5	9.293033035490924e-4	2
SYNPO2	1.3229792439096875	4.079409996452258	4.515014599549537e-5	9.3545207497655e-4	2
CWF19L1	-0.386063	-4.07936	4.515917429410346e-5	9.3545207497655e-4	2
DEXI	0.7363559860701994	4.0778853796947905	4.544716030263352e-5	9.396644708382495e-4	2
MEFV	-1.17136	-4.07706	4.560858868637252e-5	9.412493683732232e-4	2
RWDD1	-0.4276	-4.07462	4.60886335560292e-5	9.493916481866276e-4	2
IFI16	0.4153684540158927	4.072676388937669	4.6475978285027624e-5	9.555977535160401e-4	2
VIM-AS1	-0.611457	-4.07189	4.663233544893334e-5	9.57040333622009e-4	2
SDC3	0.9103780639848895	4.07061519893259	4.688914687413992e-5	9.605354201910989e-4	2
HIGD2A	-0.492455	-4.06901	4.721236329296805e-5	9.653754505374296e-4	2
CHSY3	1.1121437607070814	4.066640111904622	4.76958135873327e-5	9.734680482723437e-4	2
CDON	1.3771916807553424	4.066042845511344	4.781814830559624e-5	9.741741296092387e-4	2
CTSZ	0.7337442798571392	4.064817931843416	4.806997179918413e-5	9.775108001581344e-4	2
ARAF	-0.420561	-4.06057	4.8953329133821696e-5	9.936541377930938e-4	2
MRC2	1.0313052321723148	4.059452695137843	4.9187871168432276e-5	9.965929444947146e-4	2
FPR2	-1.24744	-4.05788	4.952074298035493e-5	9.99345536704149e-4	2
DAZAP2	-0.4734	-4.05761	4.957801000472202e-5	9.99345536704149e-4	2
TBC1D2B	0.3590825338120882	4.057407045068501	4.962055661768541e-5	9.99345536704149e-4	2
RAD9A	0.5390979707300827	4.057109670113215	4.9683755404907706e-5	9.99345536704149e-4	2
ABT1	-0.508891	-4.05606	4.990672111207792e-5	0.0010020150533587725	2
RBMXL1	-0.432473	-4.05218	5.074365791843373e-5	0.0010169798445277432	2
PLEKHA5	1.0211123189672529	4.049615527242133	5.130184731167564e-5	0.0010263142535162785	2
ACSL1	-0.673253	-4.04742	5.178506281530284e-5	0.0010327576875721572	2
PAIP2	-0.486827	-4.04731	5.180996415182307e-5	0.0010327576875721572	2
VASH1	0.6594197278477115	4.046781037339221	5.192677233685164e-5	0.001033231099025204	2
BZW1	-0.465975	-4.03909	5.3658084717159706e-5	0.0010657705091495961	2
PDE8B	1.0834721253679513	4.03853875040066	5.378520911835361e-5	0.0010663547732119817	2
RABGGTB	-0.489519	-4.03788	5.3936148909921184e-5	0.0010663547732119817	2
CFAP161	-0.928459	-4.03771	5.397562663650668e-5	0.0010663547732119817	2
GABARAPL1	-0.621341	-4.03403	5.482728826155461e-5	0.001077905257030074	2
CNOT8	-0.432408	-4.03381	5.487987555406718e-5	0.001077905257030074	2
DDX24	-0.465169	-4.03374	5.489561118635522e-5	0.001077905257030074	2
MVD	-0.616822	-4.03352	5.494860627569322e-5	0.001077905257030074	2
LINC00909	-0.488912	-4.03227	5.5240159948180914e-5	0.0010817133966572357	2
EPHX1	0.6686127290972946	4.028414885370822	5.6154183289388155e-5	0.00109767587510929	2
MEF2C-AS1	0.868433506467609	4.027100521654656	5.6468894971394976e-5	0.0011006437155613737	2
CYP51A1	-0.888293	-4.02669	5.65670791632243e-5	0.0011006437155613737	2
RLIM	-0.45641	-4.02613	5.6701168474483596e-5	0.0011006437155613737	2
CEBPB	-0.703542	-4.02613	5.670253132496675e-5	0.0011006437155613737	2
HOTAIRM1	-0.553151	-4.02414	5.718474939608219e-5	0.001108066793271729	2
PGRMC2	0.47475868623245243	4.020954758099424	5.796273738928011e-5	0.001121185145005535	2
CCDC191	0.5964179119474757	4.019906363566183	5.8221277003992725e-5	0.0011212214664955112	2
LBR	-0.482566	-4.01988	5.8228354796793276e-5	0.0011212214664955112	2
SMPD1	0.5291564655612967	4.019506534302886	5.8320164388628866e-5	0.0011212214664955112	2
PHF5A	-0.464476	-4.01931	5.836854972839822e-5	0.0011212214664955112	2
COL15A1	1.6940585557966839	4.0184593629680085	5.85799094168189e-5	0.0011233380557080144	2
UHRF1	0.8430800450880651	4.014262860882559	5.963186204176829e-5	0.0011389592671500945	2
FHL1	-0.891114	-4.01422	5.964308012936145e-5	0.0011389592671500945	2
CHCHD7	-0.523332	-4.01398	5.970226906974286e-5	0.0011389592671500945	2
PLEKHM1	-0.420723	-4.0124	6.0105247532873256e-5	0.0011446802115908951	2
KLHL5	0.5248954220838765	4.01098476023958	6.046601369703627e-5	0.0011483899729991833	2
HIF3A	-1.47492	-4.01083	6.0506902116952374e-5	0.0011483899729991833	2
GTSE1	1.1345357636673923	4.006912867768151	6.151754439895044e-5	0.0011641227706335594	2
BNIP2	-0.367726	-4.00681	6.15455342125461e-5	0.0011641227706335594	2
RABIF	-0.517644	-4.0048	6.206938536839145e-5	0.0011720346696347792	2
ZNF846	0.46129130538078034	4.002869806516997	6.257874297213681e-5	0.0011796464910350342	2
WTAP	-0.40485	-4.00227	6.273708736497018e-5	0.0011806269169716338	2
ADM	-1.16091	-3.99987	6.337808697106762e-5	0.0011904963723038014	2
POLR2M	-0.466783	-3.9991	6.358387706709627e-5	0.0011904963723038014	2
TMEM38B	-0.628459	-3.99901	6.360834810455633e-5	0.0011904963723038014	2
NFATC4	1.4820177882332453	3.9987034132201726	6.369043007731767e-5	0.0011904963723038014	2
ZBTB24	-0.537044	-3.99784	6.392242803165929e-5	0.0011928247368664085	2
GNA15	-0.602743	-3.99632	6.433569167775576e-5	0.001198522121976715	2
C5AR1	-0.858845	-3.98887	6.638825739470322e-5	0.0012346881438080233	2
HADHB	-0.330649	-3.98774	6.67046943867098e-5	0.0012384986986214697	2
UPP1	-0.585337	-3.98642	6.707730959786672e-5	0.001243337843848271	2
PTGFRN	0.6770796333686497	3.985471862761638	6.73461578561755e-5	0.001246006009592076	2
FPR1	-0.86842	-3.98512	6.74457004201421e-5	0.001246006009592076	2
PSMG1	-0.421347	-3.98323	6.798378570947383e-5	0.0012538604198210762	2
ADAM28	0.9977595213083863	3.981357549382958	6.852278267207894e-5	0.0012617055655192247	2
TP63	1.2384117187698065	3.980913631724369	6.865089184895119e-5	0.0012619716096008361	2
SMNDC1	-0.344932	-3.9783	6.940838087392537e-5	0.001273038364379493	2
ACADVL	-0.450089	-3.9777	6.958623933051985e-5	0.001273038364379493	2
PSME4	-0.563134	-3.97766	6.959689157690284e-5	0.001273038364379493	2
SOCS7	0.4392210905960021	3.9764068924533293	6.9964373851417e-5	0.0012776553336715179	2
CD164	-0.525579	-3.97575	7.01584915866903e-5	0.0012790964402085755	2
PLXDC1	1.4280214748448512	3.9748757198958766	7.041601709012125e-5	0.0012816869471337972	2
PLEKHA1	0.4903622405696836	3.973850270119633	7.072003012183597e-5	0.0012851137388588296	2
CCND1	0.9450996812528489	3.9728132509823877	7.102873557976832e-5	0.0012886144626506005	2
TMEM41B	-0.358008	-3.97154	7.140832695609252e-5	0.0012933876903645928	2
DCBLD1	0.46599450469564974	3.9693589163521743	7.206626132191471e-5	0.001302193425364283	2
ZNF609	0.44286300889934643	3.968629095548655	7.228729311990904e-5	0.001302193425364283	2
TBC1D1	0.37979710712865516	3.9685042558990937	7.232516592521295e-5	0.001302193425364283	2
TCTEX1D2	0.95946499730929	3.9683775425255243	7.236362635771977e-5	0.001302193425364283	2
SYT17	0.8152303156858146	3.9656732315953813	7.318907382659269e-5	0.0013119087098632661	2
TCTN2	0.6895124111863846	3.965662989306954	7.319221698205346e-5	0.0013119087098632661	2
RPS15	-0.399885	-3.96545	7.325798433893768e-5	0.0013119087098632661	2
NUP58	-0.399596	-3.96371	7.379265796478216e-5	0.0013193556866070472	2
PPDPF	-0.698317	-3.96018	7.489342265770372e-5	0.001336883716669589	2
PBXIP1	0.5058220061270656	3.9580305594258847	7.55702910009263e-5	0.001346800868351982	2
SIAH1	-0.454616	-3.95663	7.601580625836027e-5	0.001352569706548997	2
LRRC1	0.8014409692944109	3.9554445473673834	7.639246676669026e-5	0.0013560834823469444	2
SSH2	-0.553692	-3.95524	7.645755741233786e-5	0.0013560834823469444	2
ZBTB38	0.38368734035159724	3.9533850695334745	7.705328315689696e-5	0.0013643470850949692	2
SLC6A6	-0.491975	-3.95303	7.716923078804294e-5	0.0013643470850949692	2
LINC01010	1.387650728550605	3.9515240904605218	7.765505323624148e-5	0.0013707536662670734	2
UQCR11	-0.436314	-3.95071	7.791827375469312e-5	0.0013732168150767583	2
EML2	0.45462948376576545	3.9480847800669356	7.877890804404375e-5	0.0013861841775166684	2
PRR16	-1.17726	-3.94756	7.895108641081147e-5	0.0013870156842076579	2
MTA3	0.5166226096074119	3.94552400992406	7.962565235450372e-5	0.0013966565846635938	2
ANXA3	-0.756857	-3.94376	8.02148969043612e-5	0.0014039832993370588	2
THBS3	0.854921071643714	3.9435141186471143	8.029626182824752e-5	0.0014039832993370588	2
GABBR1	0.8577615271610329	3.94188196709382	8.084476113010385e-5	0.0014113512308609167	2
WAS	-0.675237	-3.94016	8.142754659157108e-5	0.0014192936417679965	2
TNFRSF19	1.2750725842114445	3.936912355757302	8.253673446952487e-5	0.0014343286639195735	2
TCERG1	-0.254016	-3.93688	8.25485018683786e-5	0.0014343286639195735	2
TIMM23	-0.322473	-3.93547	8.30352456033223e-5	0.0014405317686463867	2
HNRNPA1	-0.337271	-3.93367	8.36591579252004e-5	0.0014490914671505463	2
ECE1	0.7398473172577519	3.9312061843237425	8.452074574761471e-5	0.0014617349533267386	2
PRR5L	0.6421656791489911	3.930578531630284	8.474170841826163e-5	0.0014632771206344616	2
DAG1	0.4595591206640823	3.927853386405231	8.570743076498263e-5	0.0014776546642602517	2
BMP2K	0.5215682639449902	3.9274348492857936	8.585666773655176e-5	0.0014779326850836187	2
SLC11A1	-0.756294	-3.92504	8.671683826457562e-5	0.0014904288780984258	2
TMEM170A	-0.421912	-3.92379	8.716504320140808e-5	0.0014958168078288005	2
COG4	0.38974325866678605	3.922878885197695	8.749714191509496e-5	0.0014991987140174372	2
FRG1	-0.447094	-3.92212	8.777426918829529e-5	0.0015016297546959054	2
NDUFB9	-0.446377	-3.919	8.89169037492821e-5	0.0015188375112742756	2
FGD6	0.6932554834465211	3.9147183042842726	9.050981546567018e-5	0.0015436720140020522	2
RPL21	-0.396056	-3.90866	9.280824864916363e-5	0.0015783768030227631	2
SDC2	1.0661271915602069	3.9086092424957197	9.282896986164679e-5	0.0015783768030227631	2
COL16A1	1.3903944333248037	3.9060851915398893	9.38034527783126e-5	0.001592507241892362	2
ALDOA	-0.66206	-3.90513	9.417429696210863e-5	0.0015929459887571037	2
SQSTM1	-0.475973	-3.90502	9.421765481054754e-5	0.0015929459887571037	2
ERGIC1	-0.501618	-3.90491	9.42597059005149e-5	0.0015929459887571037	2
TOX4	-0.303136	-3.90416	9.455365021291106e-5	0.0015954850734254582	2
ATP8B1	0.6621112581536481	3.895867864210472	9.784772603388893e-5	0.0016466460357040355	2
TGFBI	0.6624694374472335	3.8957824258629694	9.78822285476595e-5	0.0016466460357040355	2
MECP2	-0.325988	-3.89492	9.822942085440987e-5	0.0016479847829181662	2
CES1	-0.929607	-3.8948	9.828163924169933e-5	0.0016479847829181662	2
HMOX1	-1.4826	-3.89449	9.84070891718224e-5	0.0016479847829181662	2
LMLN	0.6591016815933413	3.8929853878408145	9.901811861651127e-5	0.0016555389361236539	2
CYTIP	-0.920121	-3.8925	9.921562956927794e-5	0.0016555389361236539	2
FAT1	1.1340957992567062	3.8919239792876787	9.945240969086253e-5	0.0016555389361236539	2
RRAS	0.5029917384501446	3.891918627029197	9.945460419656644e-5	0.0016555389361236539	2
NKIRAS1	-0.483854	-3.89112	9.978292564940431e-5	0.0016585176998283474	2
GCLM	-0.606115	-3.88954	1.0043604829724928e-4	0.001666878093040895	2
TMPRSS4	2.711852117225851	3.886318242193608	1.0177606490338765e-4	0.0016861809585070058	2
MED10	-0.36573	-3.88602	1.0190285716997216e-4	0.0016861809585070058	2
SLIT3	1.3035278178667657	3.885061084776345	1.0230416255220877e-4	0.0016882237329978722	2
BTN3A2	0.9159960123423414	3.884998755155278	1.0233041270895867e-4	0.0016882237329978722	2
LTV1	-0.426105	-3.88334	1.0303047986840325e-4	0.0016972513619864706	2
WNK2	2.0887599668515917	3.8815570606813403	1.0378979192403417e-4	0.0017072267551593353	2
SLC25A6	-0.466609	-3.88034	1.0430884906440066e-4	0.0017132265549734329	2
CCDC174	-0.416245	-3.87976	1.0456040939119033e-4	0.0017148216033535985	2
SDK2	0.9191315286834049	3.877550255360193	1.055135369741744e-4	0.0017271773475692406	2
PRCP	0.5114045640489289	3.8772934916160535	1.0562491389710119e-4	0.0017271773475692406	2
TIMM17B	-0.38766	-3.87457	1.0681475137156602e-4	0.0017440649771742612	2
SGK1	0.6165045865157046	3.8709916933353576	1.0839348607314464e-4	0.0017657939688892348	2
NDUFA11	-0.413372	-3.87062	1.0856094233339331e-4	0.0017657939688892348	2
NTN1	1.5147537747670514	3.8704769004584527	1.086226498019767e-4	0.0017657939688892348	2
COL7A1	1.6220353588552863	3.867334684164322	1.1003137056893154e-4	0.0017860793968228757	2
CLCN6	-0.342945	-3.86674	1.1030175624387263e-4	0.001787854597920756	2
AGER	-0.883358	-3.86377	1.1165112645584908e-4	0.0018070881297948867	2
RBL2	-0.347353	-3.86046	1.1317440392812131e-4	0.001829076283571952	2
AZIN2	1.0920879095753002	3.859248792350375	1.1373610332384005e-4	0.0018354824930299364	2
PANK1	0.9554116957722202	3.858805897714929	1.139423865097275e-4	0.001836142695816407	2
PCNP	-0.319108	-3.85704	1.1476790074682299e-4	0.0018467652202782253	2
SPECC1	0.4875478572099342	3.8563700139060004	1.1508324905041329e-4	0.0018491596442933992	2
VILL	0.8019855149265773	3.855183757313114	1.1564273306210135e-4	0.0018538177311864155	2
SRRM1	-0.361539	-3.85478	1.1583300921075157e-4	0.0018538177311864155	2
NLRP12	-0.943791	-3.85466	1.1588908406022871e-4	0.0018538177311864155	2
C12orf45	0.42671009571187607	3.8543425985875723	1.1604100902229656e-4	0.0018538177311864155	2
TTC38	-0.456553	-3.85276	1.167945160993856e-4	0.001863174586568216	2
MCAM	1.0259970258873248	3.851654842883597	1.1732230885565066e-4	0.0018689090318856376	2
ECHDC3	-0.526301	-3.84715	1.1950036650962638e-4	0.0019008776065277675	2
NQO2	-0.559123	-3.84672	1.1971138704303582e-4	0.0019015100577093372	2
DLD	-0.52763	-3.84008	1.229942926204145e-4	0.0019508651870920888	2
ARFGAP2	-0.36806	-3.83889	1.2359414159020008e-4	0.001954329122292637	2
SNRNP27	-0.433959	-3.83886	1.2360665823075125e-4	0.001954329122292637	2
LYRM1	-0.375174	-3.83859	1.237407343034967e-4	0.001954329122292637	2
FAM13A-AS1	-0.511675	-3.83798	1.2404819709368109e-4	0.0019564021766067343	2
HMGB3	0.9012027155289014	3.837092271356698	1.244997023737176e-4	0.0019596024255258337	2
ADH5	-0.384798	-3.83689	1.2460409911026196e-4	0.0019596024255258337	2
PADI4	-1.73213	-3.83596	1.2507675079839118e-4	0.0019642534145891616	2
ARL4A	-0.670936	-3.83454	1.2579961225222093e-4	0.001972815105701143	2
COL4A5	1.546425879480792	3.8333999975967217	1.2638419330414068e-4	0.001979187162561176	2
ADAMTSL1	1.5556251446093161	3.8323724721135877	1.2691339245683259e-4	0.0019846752062650875	2
CRYM	1.6828653108367053	3.831169750672599	1.275354744846081e-4	0.0019915982745465593	2
NME2	-0.651944	-3.83029	1.279928774520308e-4	0.0019959338740869353	2
NR1H3	1.1080419725566766	3.8291531439756286	1.2858497477008832e-4	0.0020023548034674484	2
MCU	0.5323922426539154	3.827868522952338	1.2925776682175697e-4	0.002007211299184949	2
PPP1R15B	-0.567286	-3.82787	1.2925840573874074e-4	0.002007211299184949	2
UIMC1	-0.279139	-3.82725	1.2958122562820092e-4	0.002009413894064127	2
NXN	1.132798202556345	3.826202828729044	1.3013507798910657e-4	0.002010555782490748	2
RNF139	-0.502698	-3.82597	1.302594207332723e-4	0.002010555782490748	2
BMPR1B	2.410905907050069	3.825796116879179	1.3035014141450998e-4	0.002010555782490748	2
FN1	1.5725824355524307	3.82574122798759	1.3037919151520657e-4	0.002010555782490748	2
TMEM100	-1.48589	-3.82394	1.3133401013586192e-4	0.002022470893950728	2
CFP	-0.999292	-3.82247	1.3212329653395692e-4	0.002031807425784659	2
AEBP2	0.3679262835914479	3.8214017671725413	1.3269526946979332e-4	0.0020377808809448343	2
MYO1E	0.3778964804115543	3.819476050163997	1.3373544311943647e-4	0.0020509179902694795	2
SRSF10	-0.282907	-3.81723	1.349561679144238e-4	0.0020658169170893227	2
EPHB2	0.8775072819180815	3.817009291525303	1.350790850947355e-4	0.0020658169170893227	2
EZH1	-0.408272	-3.8159	1.3568956694759587e-4	0.0020722988470689915	2
FAM13C	1.4710470482613722	3.815436087980783	1.359426394211295e-4	0.002073311985567034	2
STEAP2	1.4181828292128396	3.8146188668439693	1.3639327397281495e-4	0.0020773313044172353	2
FAM171A1	0.9989707165738356	3.8138311798959768	1.3682895428651168e-4	0.0020811121636207385	2
MAPRE1	-0.497651	-3.81132	1.3822928830780148e-4	0.0020974144807016214	2
COL6A3	1.37784536502845	3.8112271836376386	1.3827860937346546e-4	0.0020974144807016214	2
PDCL	-0.685202	-3.81007	1.389282537762985e-4	0.0021043934538584478	2
MRPL14	-0.514279	-3.80918	1.3942580692283526e-4	0.002107705141348395	2
SSBP1	-0.326527	-3.80901	1.3952654948131768e-4	0.002107705141348395	2
PPWD1	-0.292782	-3.8081	1.4003683019837826e-4	0.0021125393012127636	2
CBLL1	-0.399842	-3.80522	1.4167696301647538e-4	0.0021319183278439794	2
GLT8D1	0.461640699331459	3.805172391734889	1.4170546032143174e-4	0.0021319183278439794	2
SLC22A23	1.118035140823868	3.8035602977739247	1.4263125543687453e-4	0.0021429429352038134	2
NPM1	-0.434998	-3.80278	1.4308127126952668e-4	0.0021467991282507494	2
PNRC2	-0.35944	-3.80178	1.4366265736610596e-4	0.002152613339724527	2
USP38	-0.532017	-3.80124	1.4397098646005564e-4	0.0021537720310168653	2
FXN	-0.404883	-3.80097	1.4412794911695316e-4	0.0021537720310168653	2
PSMB3	-0.487616	-3.79957	1.4494607910861562e-4	0.002163086446697526	2
RPS19	-0.478449	-3.79796	1.458902885446019e-4	0.002174254864041228	2
PPP2R3B	0.758598066731048	3.7970038583973924	1.464555106920498e-4	0.002177136796315175	2
LINC00482	-0.85714	-3.79697	1.4647583417521712e-4	0.002177136796315175	2
SESN3	0.5559716728109305	3.7952985348163772	1.4746590279262942e-4	0.0021889223512119847	2
NUDCD2	-0.39064	-3.79466	1.4784846870675945e-4	0.0021916709586797733	2
MME	-1.25684	-3.79356	1.4850559926502668e-4	0.002198476891519455	2
CHMP2B	-0.348118	-3.7931	1.4878054187186226e-4	0.0021996143227740166	2
RAI14	0.9446770358169314	3.7923171839842618	1.492481166767425e-4	0.00220359287162483	2
SCAND1	-0.416276	-3.7903	1.5046294998030408e-4	0.002218579194729504	2
H3F3B	-0.692122	-3.78844	1.5159669203407356e-4	0.0022323316600189906	2
CLIC6	1.395175996607056	3.7862561502952223	1.529340287782955e-4	0.0022489835941524403	2
SNW1	-0.327447	-3.78572	1.532649265069638e-4	0.0022489835941524403	2
LYSMD3	-0.44335	-3.7856	1.5333518695608372e-4	0.0022489835941524403	2
ABHD13	-0.382728	-3.78159	1.55831392776735e-4	0.002280162153009871	2
ENKD1	1.0742008777889882	3.7815082798844	1.5588103645675054e-4	0.002280162153009871	2
PRELID3B	-0.508449	-3.7812	0.00015607702749594721	0.002280162153009871	2
SUSD6	0.3683752386124854	3.778167244149632	1.579867706923357e-4	0.0023050290604428427	2
MID1	0.9685686287606138	3.775117195047112	1.599324545821123e-4	0.002330354387434636	2
PRKCE	-0.501114	-3.77191	1.6200324760354251e-4	0.002357433890094538	2
HSPA9	-0.331566	-3.76953	1.6355595142829855e-4	0.0023769132574717263	2
PAK1	0.45554768647811983	3.769020923329255	1.6388915047986906e-4	0.0023786421408862565	2
STX11	-0.828903	-3.76859	1.6417151595745331e-4	0.002379629688871546	2
COQ10B	-0.412672	-3.76654	1.6552888727981442e-4	0.002396176317428656	2
PLEKHS1	2.361910568280456	3.765713776584195	1.6607395720859243e-4	0.002398093044930106	2
USP3	-0.412958	-3.76568	1.6609326772505192e-4	0.002398093044930106	2
JMJD6	-0.55727	-3.76504	1.6651915192982363e-4	0.002399488545153424	2
GTPBP4	-0.321896	-3.76489	1.6662319658653762e-4	0.002399488545153424	2
RPL18A	-0.445794	-3.76457	1.6683825604417216e-4	0.002399488545153424	2
TANK	-0.408781	-3.7632	1.6775568352799084e-4	0.0024070259977229404	2
MKRN2	-0.390114	-3.76314	1.6779592202445788e-4	0.0024070259977229404	2
COL1A2	1.3327569400786916	3.7592007348788865	1.704570362799319e-4	0.0024408755429354964	2
NDRG2	0.8090526729477056	3.7589978809878675	1.705952824748217e-4	0.0024408755429354964	2
NDUFB11	-0.467192	-3.75778	1.714301878814176e-4	0.002449664576637554	2
LINC00882	0.99568467661453	3.7567730398965367	1.721184629385761e-4	0.0024563384241735355	2
ZFHX2	1.0553514764986436	3.7536917779641112	1.7424910445995503e-4	0.0024835530254414388	2
ANKRD36C	0.6923060972760567	3.7519113019353583	1.7549155629764242e-4	0.002498054807144518	2
COX6A1	-0.561399	-3.75126	1.7594862286234757e-4	0.0025013541096551156	2
ARRB2	-0.539997	-3.74921	1.77391948800252e-4	0.002518648091469563	2
PSMD11	-0.320395	-3.74828	1.7805287597362054e-4	0.0025248034252044814	2
SAR1A	-0.386719	-3.74459	1.8068828978955756e-4	0.002558905716241655	2
HIC2	-0.605537	-3.74264	1.8209449504355373e-4	0.002571056287901239	2
SRP54	-0.335579	-3.74247	1.8222274652779968e-4	0.002571056287901239	2
RPS25	-0.356076	-3.74216	1.8244486854153964e-4	0.002571056287901239	2
DDX39A	-0.543075	-3.74212	1.8247251687527482e-4	0.002571056287901239	2
MARK1	1.0371896690705296	3.7415648496374323	1.828779724887077e-4	0.0025735033314855786	2
SIPA1L3	0.374359594031938	3.7399147063427063	1.8408270852582608e-4	0.0025871776110914517	2
NEK10	1.2428662381842368	3.7389596795994784	1.8478335854510232e-4	0.0025937416307538195	2
CCDC146	0.7233037633852671	3.73529613411805	1.8749441954343303e-4	0.002628320782369871	2
FANK1	0.9308183741598125	3.7346715852794063	1.879603057682703e-4	0.002628320782369871	2
PPM1A	-0.373122	-3.73439	1.8816954021860894e-4	0.002628320782369871	2
POLR2C	-0.484879	-3.73424	1.8828109357154742e-4	0.002628320782369871	2
USP16	-0.37527	-3.73394	1.8850914943678015e-4	0.002628320782369871	2
EAF1	-0.507251	-3.73373	1.886671767584245e-4	0.002628320782369871	2
CXorf40B	-0.550078	-3.73186	1.9007067990332654e-4	0.0026445548357977877	2
FTH1	-0.685675	-3.73006	1.9143781152660493e-4	0.0026602428302626964	2
C19orf44	0.8879646520554674	3.72971461342888	1.9169676912808998e-4	0.002660511534536479	2
UBA6-AS1	0.6475821149656789	3.729382108405247	1.919498865416396e-4	0.0026606986145715663	2
CCND3	-0.479421	-3.72644	1.9420078740779953e-4	0.002685935500179026	2
TMEM176B	1.0873542167276828	3.7263736672439065	1.9425436428386546e-4	0.002685935500179026	2
PDE1A	1.1477284625411033	3.725367076784364	1.950312036337287e-4	0.0026933227039120516	2
HECA	-0.470415	-3.72395	1.9612758206720508e-4	0.0027050988120399726	2
CTBS	-0.414899	-3.72296	1.9690117967215268e-4	0.002712399252977557	2
SYTL1	0.9921798531742213	3.7192815458819695	1.9979025613679592e-4	0.002748787129971307	2
MPP3	-0.576623	-3.71727	2.013892215034053e-4	0.0027673570870696894	2
MST1	0.754877810091247	3.716742427289844	2.0180799561537937e-4	0.002769683776659527	2
KIF11	0.7276631703172916	3.716023469508759	2.0238279192261456e-4	0.002774143381131839	2
PLIN2	-0.966995	-3.71189	2.057187803800664e-4	0.0028155869400068984	2
TMEM266	0.7998733188783733	3.7116489849972325	2.0591341036527077e-4	0.0028155869400068984	2
CCPG1	-0.364054	-3.71055	2.068060301385643e-4	0.0028243140868738983	2
MAGOH	-0.376676	-3.70866	2.0836157742095885e-4	0.002842062154920032	2
PCTP	-0.496993	-3.70767	2.0917326767537598e-4	0.0028496328723922695	2
NDUFA2	-0.370495	-3.70692	2.097924067158425e-4	0.0028545650634387246	2
CBLB	0.561194396951767	3.7047170023718694	2.1162687018634382e-4	0.002876001394955906	2
ARF1	-0.380914	-3.70211	2.1381055174747845e-4	0.0029021253741470087	2
AKR1C3	-1.09919	-3.69844	2.1693236443529325e-4	0.0029365855183612556	2
TOP2A	1.2174230263921653	3.698405024095437	2.1695850113725103e-4	0.0029365855183612556	2
CDC26	-0.439887	-3.69819	2.1714281820900573e-4	0.0029365855183612556	2
DNAJA2	-0.421282	-3.69768	2.1757789044410424e-4	0.002938889680779671	2
GSN	0.6023177765807008	3.6971005772828236	2.1807595860867635e-4	0.0029420381147413533	2
MEGF8	0.5983116546064657	3.695249363857315	2.1967108401458859e-4	0.0029599612206480303	2
KLHL3	0.782665148252986	3.6948046507906627	2.2005590606408488e-4	0.0029615523939751933	2
RHEB	-0.457009	-3.69273	2.2186380138852714e-4	0.002982268507042151	2
MTRF1L	-0.426011	-3.69116	2.2323125125530335e-4	0.002997021260807295	2
DSCAML1	1.090663176273468	3.6899428220773705	2.243044618489892e-4	0.0030077928018228586	2
HMCES	-0.463072	-3.68745	2.2651628012428074e-4	0.003033788007502882	2
FEM1C	-0.647307	-3.68615	2.2767452997120833e-4	0.003040160126699083	2
YWHAB	-0.367624	-3.68606	2.2774830392090667e-4	0.003040160126699083	2
SHTN1	-0.397024	-3.68599	2.2781349413794803e-4	0.003040160126699083	2
RTKN2	-1.20658	-3.68528	2.2844782673169604e-4	0.003044965450422595	2
TRIQK	-0.417591	-3.68329	2.3024224714369315e-4	0.0030652034412906775	2
ABI2	0.38846153784623555	3.6823229384481815	2.3111838247989042e-4	0.003073182515777513	2
SH3GLB1	-0.343768	-3.68154	2.3182837514610106e-4	0.0030758756958615325	2
SNHG15	-0.496853	-3.68125	2.3209469489962983e-4	0.0030758756958615325	2
ISG20L2	-0.387313	-3.68119	2.3215201595352285e-4	0.0030758756958615325	2
SCD5	1.2267218416381411	3.6797257530149787	2.3348491466277686e-4	0.0030898486382608006	2
SSBP3	0.5069040915201877	3.6787582351819443	2.3437230721540847e-4	0.003097323243766922	2
PSMB1	-0.411544	-3.67843	2.3467288111210407e-4	0.003097323243766922	2
OSER1	-0.479271	-3.6782	2.348866226471898e-4	0.003097323243766922	2
DMWD	0.9492907440189793	3.6775141162522247	2.3551804577950466e-4	0.0031019654356937605	2
NDUFA1	-0.441532	-3.67672	2.3624806347592362e-4	0.0031061954503036012	2
SNTB1	-0.706461	-3.67656	2.363987350721916e-4	0.0031061954503036012	2
CASC15	1.0272739293242343	3.6754466377984083	2.3743366687275111e-4	0.003116106386865432	2
SMARCD2	0.44350473520497863	3.6740533650424148	2.3873283821422046e-4	0.0031294577363547692	2
ASAH1	-0.479932	-3.67335	2.3938864818021132e-4	0.0031343539631425547	2
EPB41L2	0.5010404907209705	3.6722300755854635	2.4044305967535774e-4	0.003141078400978266	2
CHST9	2.080054396993885	3.672203534699056	2.4046803934355814e-4	0.003141078400978266	2
ARPC5	-0.406425	-3.67132	2.413044801815787e-4	0.00314830040359115	2
S100A4	-0.712082	-3.67025	2.423090228533708e-4	0.003157696104156075	2
PHF20L1	-0.30786	-3.66934	2.4317417512817002e-4	0.003165255412014152	2
ARHGAP42	1.1391609675883922	3.6672188720482572	2.4520290049888436e-4	0.0031879248293198046	2
GLO1	-0.40714	-3.66666	2.457381311143296e-4	0.0031911467482601185	2
PSMD7	-0.402526	-3.66609	2.462830305964924e-4	0.0031944865522346437	2
BRMS1	-0.449017	-3.66472	2.476066802710742e-4	0.003207327958746125	2
TTC21A	0.550171007528288	3.6644705075722226	2.478507960554963e-4	0.003207327958746125	2
MED29	-0.466007	-3.66161	2.506327987444765e-4	0.0032395529271943223	2
MYL12A	-0.638931	-3.65977	2.5244633177445017e-4	0.0032535675550213923	2
ARMC2	0.48746454433572906	3.659645319606382	2.5256458285001634e-4	0.0032535675550213923	2
PEX19	-0.446682	-3.65918	2.530188614911851e-4	0.0032535675550213923	2
CIT	0.9285430655968623	3.659045619748885	2.531562763541662e-4	0.0032535675550213923	2
SWAP70	0.3590113410532915	3.6590193388359014	2.531822361108244e-4	0.0032535675550213923	2
CENPF	0.7688125101850016	3.657453895192905	2.547330608503853e-4	0.0032697123406032697	2
S100A9	-1.22169	-3.65664	2.5553923140512845e-4	0.003276272616964366	2
ERH	-0.380755	-3.65442	2.577640413299651e-4	0.003300985179800003	2
FUS	0.30247920438028364	3.6533363196975497	2.588548217776241e-4	0.0033111348919319826	2
RPS2	-0.589024	-3.65196	2.602459978630133e-4	0.0033250993259758763	2
NBL1	1.1659105467806816	3.6510515907413414	2.611687663267436e-4	0.0033330538075009583	2
TBX1	0.9891544994396885	3.650723811634931	2.6150232320610835e-4	0.0033334790982289565	2
LPP	0.41236478042405866	3.650071161249929	2.621676676240628e-4	0.003338127997282075	2
SDR16C5	-1.15537	-3.64801	2.6428358178145394e-4	0.0033612149009386973	2
SMCHD1	-0.390484	-3.64698	2.6533945645427614e-4	0.0033707825915467136	2
TIPARP	-0.528906	-3.64432	2.6809735041460425e-4	0.003401925579032401	2
ZMYM6	-0.380501	-3.63797	2.7479184948110366e-4	0.0034828925853752214	2
CASP9	-0.508051	-3.63613	2.767681821043462e-4	0.003503941990769163	2
ST18	1.1257190115617588	3.6304702400148137	2.829053244921182e-4	0.0035763518531907977	2
SORBS2	0.9497591008014453	3.630263633896296	2.831318813793309e-4	0.0035763518531907977	2
CDK11B	-0.459734	-3.62831	2.8527764208750026e-4	0.0035978952539906877	2
SREBF1	0.49857953200052535	3.6281263751404236	2.854855191178777e-4	0.0035978952539906877	2
LGR4	1.0475433039122504	3.6243096499359067	2.8973431466522935e-4	0.003647301695836782	2
SPARC	0.902713176009572	3.6229875463156023	2.9121984873170526e-4	0.0036618504875063685	2
SRSF3	-0.349337	-3.62264	2.9161404096595913e-4	0.0036623201279046493	2
CD200R1	0.8146820561331968	3.6223693593921382	2.9191689752279694e-4	0.0036623201279046493	2
LPIN3	0.767468294770429	3.620752786800677	2.937470900478101e-4	0.003681121829346316	2
RUNX2	0.6797118876929108	3.6197577281216713	2.948789777722632e-4	0.0036911401242451392	2
SRP9	-0.325364	-3.61441	3.010320396082242e-4	0.003763162803299549	2
ENTPD1	0.5346081934927807	3.6134234873987827	3.0218055410623684e-4	0.003763162803299549	2
SLC4A4	1.4897903192732855	3.613200396601862	3.0244077508956687e-4	0.003763162803299549	2
FAM20C	0.7992111417589188	3.6130368587044037	3.026316647530901e-4	0.003763162803299549	2
GOLGA8A	0.6787040728486431	3.612957526355147	3.0272430610005365e-4	0.003763162803299549	2
UHRF1BP1L	-0.368576	-3.61277	3.029429382450808e-4	0.003763162803299549	2
ZNF154	0.8495327476329461	3.6127170625496805	3.030052730027737e-4	0.003763162803299549	2
AP4M1	0.4428260832877971	3.6093834315028115	3.0692565725441245e-4	0.0038051699311508007	2
DNAJB6	-0.359916	-3.60903	3.073480205384937e-4	0.0038051699311508007	2
PEX16	-0.407881	-3.60879	3.076238340678933e-4	0.0038051699311508007	2
IDS	-0.381949	-3.60868	3.0775849753881103e-4	0.0038051699311508007	2
CCNC	-0.394947	-3.60717	3.0955273071470163e-4	0.003823096739850203	2
ANXA5	-0.532635	-3.6041	3.132341906080152e-4	0.0038642657981342136	2
ABCC5	0.6457308584774926	3.5998173875270596	3.1844073563826696e-4	0.003924137056372561	2
HOMER3	0.6637079777898551	3.5987941297194377	3.196961365114639e-4	0.003935239693666058	2
ZSCAN18	0.5732919095564925	3.5981225773958374	3.205225579199004e-4	0.00394104314571944	2
VBP1	-0.386219	-3.59772	3.2102123757890864e-4	0.003942808408007326	2
PIK3R5	-0.465579	-3.59727	3.215742982090622e-4	0.003943392948557563	2
DLG5	0.6778294678013949	3.5968330252295573	3.221151078933744e-4	0.003943392948557563	2
HIST2H2AC	-0.984967	-3.59682	3.221343244476006e-4	0.003943392948557563	2
THOC6	-0.541028	-3.59561	3.2363665400451377e-4	0.003957420450894401	2
STARD3NL	-0.333965	-3.594	3.2564159107982717e-4	0.003977556199955249	2
TRIM2	1.2362661659278922	3.593627714683121	3.261056907717452e-4	0.003977934293880247	2
MCOLN3	1.1177319665818657	3.5931714207872467	3.266775202965407e-4	0.003977934293880247	2
LYRM9	0.46259331281684624	3.593115733215641	3.267473724235599e-4	0.003977934293880247	2
MLXIP	0.3462185789532669	3.5920721883610636	3.280589389105306e-4	0.003989527271329267	2
CD40	0.6752459324968828	3.591640905741879	3.2860242868678827e-4	0.003991764513905263	2
RNF34	-0.246773	-3.58811	3.330810512650532e-4	0.004041747445022826	2
PABPC1	-0.391432	-3.58745	3.339280110868832e-4	0.004047601208621904	2
PPP4C	-0.486044	-3.58645	3.35209149722774e-4	0.00405869922505121	2
ROR2	1.207941352125874	3.586118020186475	3.356371044074944e-4	0.004059453998078878	2
YPEL5	-0.55489	-3.58551	3.364170473378262e-4	0.004060538560127321	2
RBM17	-0.28382	-3.58548	3.3645820726984916e-4	0.004060538560127321	2
TMCC1	0.351104546656204	3.584461173727322	3.377748046698299e-4	0.0040720017983160925	2
DLEU1	0.6258220719930578	3.583403453037575	3.3914615427097e-4	0.004084099512874815	2
RAB5A	-0.285043	-3.58284	3.398755116625722e-4	0.004088448327182599	2
LYAR	-0.594517	-3.5824	3.4045214230083397e-4	0.004090952528101904	2
TACC1	0.44258074904594125	3.5787031329898142	3.453034277880526e-4	0.004137970563573065	2
C3orf38	-0.413975	-3.57856	3.454944168795088e-4	0.004137970563573065	2
SPATA18	1.1999776459887177	3.5783402040044674	3.4578317652763773e-4	0.004137970563573065	2
TACR1	1.5790549097999662	3.578016494760782	3.4621160746187455e-4	0.004137970563573065	2
STRAP	-0.399986	-3.57747	3.4693322522484296e-4	0.004137970563573065	2
CBX3	-0.362899	-3.57745	3.469626531496783e-4	0.004137970563573065	2
PXK	-0.30155	-3.57744	3.469738444282197e-4	0.004137970563573065	2
CMTR1	-0.309597	-3.57682	3.4779925502559215e-4	0.004143363871833851	2
LILRB5	0.9224612486018853	3.5761631483481917	3.4867409663046675e-4	0.004149333863759991	2
AOC3	-0.796837	-3.5756	3.494253392865698e-4	0.004153100179794325	2
TMEM50B	-0.325378	-3.57537	3.497386893729347e-4	0.004153100179794325	2
XPOT	-0.404764	-3.57469	3.506385087629438e-4	0.004159336926062997	2
ARMC8	-0.464319	-3.57019	3.567259346043591e-4	0.004227031005242475	2
ZKSCAN1	0.42389968268659795	3.5675322922554433	0.00036035898076534933	0.004265528532449546	2
CDH23	0.7356046116438636	3.566673305131023	3.615417420215083e-4	0.004274971205180838	2
YME1L1	-0.345464	-3.56563	3.629772694614094e-4	0.004287379385989392	2
PCYOX1L	0.608885984784412	3.5638446642116706	3.654622779954988e-4	0.0043121441791541155	2
ACAT2	-0.725412	-3.56349	3.659603096132815e-4	0.004313436642925971	2
E2F5	0.7430658603063397	3.5618333572489562	3.6827411984248064e-4	0.004330518024634239	2
ADAMTS10	0.7309050450573757	3.5616428067426464	3.68541559014474e-4	0.004330518024634239	2
ZNF775	0.6656270052616792	3.5616156979891587	3.685796211185586e-4	0.004330518024634239	2
UQCR10	-0.466621	-3.56085	3.6965390260247514e-4	0.004338548922405159	2
EIF3A	-0.356079	-3.56026	3.7048671996946366e-4	0.004343731839304071	2
ANAPC13	-0.34688	-3.55956	3.714762566707735e-4	0.004350739322590293	2
FAH	-0.716316	-3.55868	3.727276765191763e-4	0.004360795987768614	2
TMEM258	-0.412697	-3.55635	3.7604814727071535e-4	0.004395013241207108	2
PLA2G7	1.0244706878240772	3.555668774426821	3.770188240843109e-4	0.004399092835578505	2
ASTN2	0.8097224385910171	3.555549705915052	3.771896225768474e-4	0.004399092835578505	2
ENPP4	-0.716747	-3.55417	3.7917303841847983e-4	0.0044121248077754385	2
BCL7C	0.35177588368984997	3.553789495591657	3.797230187083113e-4	0.0044121248077754385	2
FAM177A1	-0.315863	-3.55372	3.798237541100442e-4	0.0044121248077754385	2
SMIM15	-0.45938	-3.55367	3.79896542937343e-4	0.0044121248077754385	2
RPF1	-0.425923	-3.55028	3.8481683915366226e-4	0.004464599127610357	2
CCDC60	1.46853411906657	3.5490499825670314	3.866236859362779e-4	0.004480879733768782	2
SPATS2	0.43552244688661884	3.54872768364577	3.870971790851778e-4	0.004481689238146746	2
DYNLT3	-0.45649	-3.548	3.881726891798378e-4	0.004489459758295562	2
SGMS1	-0.407418	-3.5477	3.886032404684305e-4	0.004489762517087392	2
NUP54	-0.312839	-3.54706	3.895492731367785e-4	0.004496014116047455	2
NAA50	-0.474392	-3.5455	3.918674662662098e-4	0.004518073185829416	2
DOCK1	0.4110817306235349	3.543689007818515	3.945703744746965e-4	0.00454451749771012	2
UNC50	-0.297995	-3.5431	3.9544995537692305e-4	0.004549928346683914	2
SCRN2	0.49379519604897715	3.538755455054474	0.00040201809156134686	0.00461697369028207	2
TBX19	0.6237561136197417	3.5382023796640354	4.0286115471538337e-4	0.00461697369028207	2
MXRA8	1.265755478089249	3.5381801102565063	4.028951349547495e-4	0.00461697369028207	2
STARD4	-0.776172	-3.53815	4.029404220375868e-4	0.00461697369028207	2
TMEM150B	-0.89131	-3.53627	4.0581493550378577e-4	0.00464511673082323	2
PTK2B	-0.452146	-3.53553	4.0696318410711653e-4	0.004652026196216592	2
MGAM	-0.973199	-3.53534	4.0725654892574323e-4	0.004652026196216592	2
TNFAIP8	-0.403886	-3.53498	4.0781296065781655e-4	0.004653594349623574	2
C11orf71	-0.526434	-3.53332	4.1036927663029024e-4	0.004677956959369725	2
PHC1	0.5738635994909064	3.5328288315009155	4.1113857112391885e-4	0.004681919543783458	2
TMEM183A	-0.349242	-3.53163	4.130057431301514e-4	0.0046983634897275325	2
SLC35D2	0.4510671162960134	3.5310334012047955	4.13939473030231e-4	0.004704165782041612	2
CYB561A3	0.37392894349642875	3.527643001880471	4.1927721681834135e-4	0.004759953924676937	2
MTFR1	-0.322704	-3.52733	4.197731884847543e-4	0.004760716763785727	2
CWC15	-0.414441	-3.52605	4.2180633587465593e-4	0.004778893619608475	2
DTX3	1.0310643670788977	3.5256365333307893	4.224663465112688e-4	0.00478123821366608	2
OTUD6B	-0.348859	-3.52538	4.228745317319724e-4	0.00478123821366608	2
RNPEP	-0.371121	-3.52508	4.2335267051316305e-4	0.004781774873558138	2
EGR1	0.9044029945817122	3.524765978054146	4.238570619497866e-4	0.004782606665476098	2
MID1IP1	-0.510092	-3.52322	4.2634476140634053e-4	0.004805792777557968	2
PPP1R14B	0.5937935029700964	3.5224942925106726	4.275062467564739e-4	0.004810091642982364	2
VGLL4	0.3626990040040243	3.5224407660038035	4.275925832318827e-4	0.004810091642982364	2
SDCBP	-0.526657	-3.52145	4.292011621162768e-4	0.004823300104227755	2
MMADHC	-0.318143	-3.52009	4.3140111136318174e-4	0.004843120869024679	2
MAP4K2	-0.584802	-3.51969	4.3205084127886207e-4	0.0048455156471911166	2
ZNF317	-0.348767	-3.51856	4.3388803893682073e-4	0.0048583117085274335	2
RASSF9	1.2907112396938	3.518455298223527	4.3406693820221686e-4	0.0048583117085274335	2
TSHZ1	0.4245933562334282	3.517844642230494	4.3506699119900445e-4	0.004864601010355032	2
NLRP3	-1.02746	-3.51417	4.411381432962483e-4	0.0049275219366380725	2
ECH1	-0.491422	-3.5106	4.4710115827227933e-4	0.0049891097088413236	2
VNN1	0.8063741358447987	3.5086662033614693	4.503597439663693e-4	0.005020425941022689	2
ESR2	1.1833129052007316	3.506253056780247	4.5446292145858125e-4	0.00505642228005649	2
DAAM1	0.3812966681327004	3.5062315574866223	4.5449963392744095e-4	0.00505642228005649	2
GPC4	0.9375878166263762	3.501958297809638	4.618519016791103e-4	0.005133074739082244	2
MIER1	-0.320824	-3.4994	4.663099207124828e-4	0.0051724663538167265	2
SYNJ2	0.6236973075798804	3.4992848229508624	4.665079667917576e-4	0.0051724663538167265	2
MIOS	-0.304178	-3.49912	4.6679377524311993e-4	0.0051724663538167265	2
RNF180	0.8162361459227591	3.496325387234325	4.717131055659139e-4	0.0052217653151528836	2
MRPL57	-0.346829	-3.49511	4.7386821009990905e-4	0.005240397148146703	2
PTP4A3	0.8489674337952823	3.4914734527699594	4.803641998946177e-4	0.005306948966596956	2
NEK11	0.5590418159366705	3.491095046125496	4.8104508973687265e-4	0.005309188500346419	2
PIGA	-0.57124	-3.49076	4.8165163170882196e-4	0.005310603839983168	2
SSPN	0.8377756882129022	3.4887613055768427	4.8526426423791134e-4	0.005340403503676794	2
PDGFA	0.6879090468646863	3.488732628774296	4.8531632308474154e-4	0.005340403503676794	2
LCLAT1	0.4149463754290416	3.4875494752929064	4.8746872393562804e-4	0.0053587774671854235	2
BCO2	0.8253437566243449	3.4871838305829503	4.8813570591399425e-4	0.005359624799424691	2
ITCH	-0.262484	-3.48698	4.885112399367547e-4	0.005359624799424691	2
DNAJC2	-0.347323	-3.48654	4.893141783194249e-4	0.005363134572438869	2
ANKRD16	0.5803936939357183	3.4861986291678337	4.899370756409678e-4	0.005364666026471071	2
UGP2	-0.327435	-3.48584	4.906018646116232e-4	0.005366652712101333	2
KLF11	-0.496844	-3.48514	4.918770627413467e-4	0.005373768065811175	2
FADS1	-0.628428	-3.48477	4.92567072902609e-4	0.005373768065811175	2
ARL6IP6	-0.366292	-3.48469	4.927043043317821e-4	0.005373768065811175	2
SDCCAG8	-0.39975	-3.48405	4.938810779232828e-4	0.005381316592916789	2
SMPDL3A	0.8361796125370938	3.4836352105131088	4.946531926254053e-4	0.005384445487960661	2
UBTD2	0.39607538737207826	3.481628646187092	4.983743218907296e-4	0.005416330052331006	2
LIMD1	0.3733014444527943	3.4815299704179345	4.985579855428522e-4	0.005416330052331006	2
PFKP	0.5516187987606673	3.4809867490441193	4.995702054268156e-4	0.005422021496435908	2
EIF2A	-0.392993	-3.4804	5.00669707410404e-4	0.005424486470034495	2
FBXO32	0.9532622782408849	3.480341814347017	5.007744422034907e-4	0.005424486470034495	2
DYNC1LI1	-0.285056	-3.47776	5.056257607688082e-4	0.005471698656740816	2
SYK	-0.438482	-3.47709	5.068841494496871e-4	0.005479975376182936	2
GLUL	-0.659735	-3.47663	5.077559606524978e-4	0.005481184065158372	2
EWSR1	-0.243115	-3.47651	5.079832840716892e-4	0.005481184065158372	2
CDHR3	0.9456364077061423	3.4749707659802813	5.10909026285221e-4	0.0055074008920823385	2
CISH	-0.541922	-3.47205	5.164984993210487e-4	0.005562252995113098	2
MYSM1	-0.290459	-3.47152	5.175282841408217e-4	0.005562794357223104	2
MFHAS1	0.46596641096582186	3.471504424158428	5.175508034775706e-4	0.005562794357223104	2
DPYSL3	1.2030621101737546	3.47032595272172	5.198271156131731e-4	0.0055763132555974445	2
STK17B	-0.657443	-3.47029	5.198962706578031e-4	0.0055763132555974445	2
LAMTOR5	-0.397968	-3.46982	5.208128255170255e-4	0.0055763132555974445	2
SLC39A11	0.38499446938344634	3.469814714225852	5.208175129293479e-4	0.0055763132555974445	2
SMC1A	-0.426882	-3.46949	5.214563357508791e-4	0.005577774273450877	2
IMMT	-0.271354	-3.4673	5.257053182299575e-4	0.005617811499814454	2
NRDC	-0.303974	-3.46664	5.270093055902288e-4	0.0056255252946104985	2
TYW5	-0.326531	-3.46642	5.274404964144402e-4	0.0056255252946104985	2
RGS5	1.0607397859255887	3.46603374584449	5.281969800051073e-4	0.0056281872063308125	2
DDIT3	-0.678385	-3.46521	5.298141385568861e-4	0.005640006117351013	2
DENND4B	-0.434667	-3.46453	5.311648646319992e-4	0.005647620909679052	2
EMC6	-0.429482	-3.46433	5.31546775701577e-4	0.005647620909679052	2
NET1	0.6314993112774208	3.46211296778628	5.359521442805666e-4	0.005685017357152912	2
MAP1LC3A	0.5486717549865444	3.4620434845380985	5.360905316526253e-4	0.005685017357152912	2
OASL	-1.18665	-3.46147	5.37232863919043e-4	0.0056916951222262735	2
NOL7	-0.441879	-3.46078	5.386199779341586e-4	0.005700951015255446	2
C1QTNF6	0.8074900423724654	3.4591940974445383	5.417943186935081e-4	0.005729087924241924	2
CEACAM19	-0.65621	-3.45709	5.460410556682363e-4	0.005768500324533234	2
NAP1L4	0.22629853575991202	3.4565821834641777	5.470723603120997e-4	0.005773901536639966	2
EXOSC10	-0.299877	-3.45432	5.51680172775966e-4	0.005817003759099288	2
NAMPT	-0.656777	-3.45333	5.537205336331565e-4	0.005829006592635088	2
TMIGD3	-1.34271	-3.45325	5.538684999756838e-4	0.005829006592635088	2
ZBTB43	-0.356248	-3.45173	5.5699505172566e-4	0.005856359904649624	2
JOSD1	-0.440252	-3.45005	5.604864904349214e-4	0.005884006529124002	2
U2AF1L5	-1.29915	-3.44995	5.606844013161483e-4	0.005884006529124002	2
CDC40	-0.299901	-3.44967	5.612822986412374e-4	0.005884718944111103	2
C3	0.9138324014280459	3.449043443100008	5.625761848105788e-4	0.0058927201697659025	2
DUSP18	0.4746458099759268	3.446648702250352	5.675861064681895e-4	0.005939593346009716	2
GINS1	0.8900984707852172	3.445458415583788	5.700916762769974e-4	0.0059545946074876475	2
SEC24C	-0.34144	-3.44546	5.700922334287462e-4	0.0059545946074876475	2
LRP5L	-0.559652	-3.44499	5.710731482815809e-4	0.0059592341779796925	2
LRPAP1	-0.704319	-3.44379	5.736276111197896e-4	0.005980269827477018	2
PEBP4	-0.879551	-3.44008	5.81540139162596e-4	0.006057073325630678	2
ASGR1	-0.604603	-3.43965	5.82465272826599e-4	0.006061023359131891	2
GINM1	-0.331382	-3.43886	5.841602470528497e-4	0.006066399557453601	2
GPS2	-0.491972	-3.43875	5.844051385902212e-4	0.006066399557453601	2
NCF4	-0.62955	-3.43865	5.846210507498292e-4	0.006066399557453601	2
SPCS2	-0.391582	-3.43783	5.864054254703613e-4	0.0060792338365989	2
ENDOD1	0.48556091477564706	3.437215662764677	5.877274366683683e-4	0.006087255344523221	2
HIVEP2	0.6077713235448583	3.4355126958655204	5.914337505162013e-4	0.006119933766991038	2
HMGCS1	-0.435537	-3.43242	5.982219201499663e-4	0.006184411526466552	2
HSD17B4	-0.486222	-3.43062	6.0221057336319e-4	0.0062198548800479056	2
KLHL2	-0.469084	-3.42951	6.046677278521504e-4	0.00623942916574575	2
RAB9A	-0.417182	-3.42854	6.068272516085013e-4	0.006255898769367864	2
DPYSL2	0.5121958526262176	3.4273339606764233	6.09538937014819e-4	0.006272507507053733	2
INTS12	-0.370035	-3.42732	6.095681887878031e-4	0.006272507507053733	2
NDUFA13	-0.478304	-3.42638	6.116826869057588e-4	0.006283355590051954	2
UAP1	-0.475986	-3.42635	6.117542459557023e-4	0.006283355590051954	2
PDCD10	-0.36023	-3.42396	6.171671320318236e-4	0.006333093037845967	2
NFASC	1.1449436080042439	3.4228439648125506	6.196963879634263e-4	0.00635317543449485	2
NRGN	0.5551523983306061	3.42232388187217	6.20883064663803e-4	0.006359469249965134	2
TPD52L1	0.7451807863326818	3.4210088246640273	6.238930781232968e-4	0.0063792230898228825	2
TMEM170B	-0.614325	-3.42098	6.23960756151279e-4	0.0063792230898228825	2
NDFIP2	0.7154786398756862	3.4194930823309813	6.273792768960292e-4	0.00640827241157002	2
MRPS15	-0.464326	-3.41901	6.284937475145604e-4	0.006413755586998312	2
SDHA	-0.304159	-3.41845	6.297905715113554e-4	0.0064210878930124685	2
ANGEL2	-0.288091	-3.41661	6.340540886281394e-4	0.00644021977855573	2
PSMD2	-0.377338	-3.41658	6.341187386445684e-4	0.00644021977855573	2
PIGQ	0.4725179937516936	3.416523867067657	6.342610379120382e-4	0.00644021977855573	2
MEGF6	0.6367992299406275	3.4163935573268907	6.345646597902686e-4	0.00644021977855573	2
GOLPH3L	0.4503432296509201	3.4163924358128592	6.345672735062568e-4	0.00644021977855573	2
IQCG	0.6079261293379998	3.4155220377169253	6.365987802396826e-4	0.006454937221005659	2
ETS2	-0.554409	-3.41524	6.372551616127619e-4	0.00645569713447673	2
CFI	1.1360193084474133	3.414052752964828	6.400418179145992e-4	0.006473609608673947	2
PIGBOS1	-0.434998	-3.41399	6.401894398202282e-4	0.006473609608673947	2
TM2D3	-0.403953	-3.41273	6.431524393843158e-4	0.006495848238120129	2
KREMEN1	0.5704601274144658	3.412291352386533	6.4419221016595e-4	0.006495848238120129	2
GOLT1B	-0.481595	-3.41209	6.44668066770916e-4	0.006495848238120129	2
TLR2	-0.664639	-3.41206	6.447288803394021e-4	0.006495848238120129	2
NSUN3	-0.374633	-3.41165	6.457117998922818e-4	0.006498208406848067	2
NAAA	-0.539061	-3.41147	6.461336648797861e-4	0.006498208406848067	2
KCNMB2	1.1065584638274497	3.4081039448012658	6.541597073590205e-4	0.006570673316752125	2
GOPC	0.28804904527862135	3.407952603718441	6.545226234646358e-4	0.006570673316752125	2
GADD45B	-0.607375	-3.40651	6.5799906054247e-4	0.006599605753570953	2
PTGER2	-0.78567	-3.40569	6.599757569027435e-4	0.006613457426797077	2
C1orf54	0.6113674295461596	3.4052056694958917	6.611424026595227e-4	0.006617151080610577	2
AK4	0.9181903346267063	3.4050430197651864	6.615363144625543e-4	0.006617151080610577	2
CTDSPL	0.5726756792357163	3.4014976427997556	6.701770653412848e-4	0.0066975481156474215	2
FOSB	0.886117150938204	3.401127212886604	6.710859017680427e-4	0.006699830072618122	2
ZNF385D	1.0361405795990013	3.4009128912437365	6.716122553205412e-4	0.006699830072618122	2
ADAP1	-0.791382	-3.40046	6.727289414198758e-4	0.0067049456342772725	2
POLR2E	-0.482066	-3.39933	6.754999782333132e-4	0.006726525792219262	2
TRAF6	-0.334546	-3.39838	6.778650897531997e-4	0.0067440287558510545	2
PTK2	0.5224325370750611	3.397257127608461	6.806497803135212e-4	0.006765671003420793	2
DGKD	-0.434514	-3.39657	6.823588224786402e-4	0.006776592134150575	2
SFTPC	-1.56787	-3.39611	6.835191729293298e-4	0.006782049487966353	2
VPS4B	-0.290542	-3.39448	6.875795298348812e-4	0.006816245999782756	2
HEATR5B	-0.546223	-3.394	6.887855602378209e-4	0.006822110682712333	2
ATP6V0B	-0.45059	-3.39153	6.95035432031316e-4	0.006877877363497061	2
PPARG	-0.83848	-3.39116	6.959853319182653e-4	0.006881144381378896	2
MAP2K1	-0.525287	-3.39039	6.979451381507247e-4	0.006890111932615981	2
TSPAN33	0.9806161198552533	3.3902128008076233	6.983838876270594e-4	0.006890111932615981	2
ANO9	0.9449461275681532	3.390067550432548	6.987540336959015e-4	0.006890111932615981	2
EYA1	1.5849991312091853	3.388263481301382	7.033666196461587e-4	0.006924467139801199	2
SEC23B	-0.278675	-3.38822	7.03485448409957e-4	0.006924467139801199	2
TMC5	1.083132781996385	3.38621345398215	7.086424003096899e-4	0.006969049221114691	2
TMUB2	-0.268971	-3.38523	7.111836778373766e-4	0.006987851659317161	2
HSPD1	-0.425869	-3.38441	7.133223638470182e-4	0.007002380083026599	2
ASPM	0.8340860690020047	3.38417545746987	7.139236471211483e-4	0.007002380083026599	2
SRSF11	-0.259881	-3.38198	7.196476150779676e-4	0.00705229255976229	2
DDIT4	-0.710074	-3.38118	7.21762680673138e-4	0.007064682239441748	2
ABCA7	-0.50133	-3.38073	7.229233782321912e-4	0.007064682239441748	2
ZBTB20	0.5244059264843577	3.380594540533326	7.232918778832441e-4	0.007064682239441748	2
PSMA2	-0.430021	-3.38053	7.2345705721384e-4	0.007064682239441748	2
IKBIP	0.43443732357544884	3.3797992903182315	7.253878136694967e-4	0.007077311858675239	2
COX17	-0.379477	-3.37864	7.284629118996818e-4	0.007097343311865576	2
SLC50A1	-0.392629	-3.37854	7.287193889513426e-4	0.007097343311865576	2
RBM8A	-0.420654	-3.3774	7.317450421843833e-4	0.007120565471843302	2
FBXO38	-0.388213	-3.37641	7.343785237171245e-4	0.007137307707224613	2
NCKAP1L	-0.346104	-3.37627	7.347512122271218e-4	0.007137307707224613	2
SEH1L	-0.37052	-3.37406	7.406707692536982e-4	0.0071885205865592754	2
TSPAN15	0.6715057800925363	3.373817797292763	7.413341908952749e-4	0.007188675564637762	2
GRIPAP1	-0.340383	-3.37249	7.449239745218724e-4	0.007217182276715838	2
PLCXD1	-0.562151	-3.37139	7.4788942586879e-4	0.007238335966883154	2
ETFDH	-0.355221	-3.3712	7.484112122833342e-4	0.007238335966883154	2
SNRPD2	-0.346547	-3.37087	7.493246396926334e-4	0.007240862902095134	2
TNFSF10	0.8678954847028866	3.3696878645575543	7.525337435807931e-4	0.007265549699980475	2
PPIF	-0.622285	-3.36891	7.546717865468116e-4	0.007279861725481537	2
SLU7	-0.381267	-3.36851	7.557590825078315e-4	0.007284021782191365	2
TMEM67	0.5648768067376864	3.3658211598061447	7.631616986545352e-4	0.007336644837715582	2
PGS1	-0.339638	-3.36571	7.634585535361961e-4	0.007336644837715582	2
DUSP2	-1.18704	-3.36562	7.637213563392383e-4	0.007336644837715582	2
STON1	-0.891546	-3.36538	7.643915920046902e-4	0.007336644837715582	2
MRPL47	-0.382178	-3.36533	7.645229286892667e-4	0.007336644837715582	2
SUMO1	-0.355951	-3.36475	7.66135558004224e-4	0.007345771243973143	2
NBPF26	-1.02101	-3.36416	7.677723087520245e-4	0.00735511298021892	2
TIMM17A	-0.378639	-3.36347	7.696895936261635e-4	0.007367123756923529	2
A4GALT	0.9759198818967206	3.3623498153953837	7.728215231481698e-4	0.0073907298634919285	2
AHCTF1	-0.389705	-3.36159	7.749463391973059e-4	0.00740467229269164	2
SLC25A5	-0.518559	-3.36089	7.769243184404547e-4	0.007408550256536675	2
ZNF607	0.8806824228942179	3.360870302933222	7.769730093328053e-4	0.007408550256536675	2
ERBB2	0.7995689544231819	3.360734906048953	7.773539627907075e-4	0.007408550256536675	2
RNF150	1.322866108761397	3.358455819192556	7.837924944672435e-4	0.007463506060094172	2
SLC25A12	0.35633348111965446	3.3578656312779316	7.854678544442127e-4	0.0074730502038509805	2
LPAR1	0.5424880052675176	3.3574012305687626	7.867884798125993e-4	0.007475793526457755	2
GYPC	-0.55197	-3.35729	7.871028219786647e-4	0.007475793526457755	2
ERV3-1	-0.387049	-3.35551	7.922011476004028e-4	0.007517785762228437	2
DHPS	-0.51535	-3.35407	7.963318012273577e-4	0.0075489444845552095	2
SORCS2	0.9612535227236988	3.353662197076534	7.974965803536529e-4	0.0075489444845552095	2
HRH1	0.6641579443649627	3.353652591799111	7.975242619457139e-4	0.0075489444845552095	2
IER3IP1	-0.336028	-3.35247	8.009448752801939e-4	0.007569329556403403	2
SLC3A2	-0.602368	-3.35243	8.010413607830315e-4	0.007569329556403403	2
MED4	-0.305563	-3.35125	8.044652355617493e-4	0.007595218971464372	2
SMURF2	0.3227562131066544	3.3492534291541878	8.102964212959422e-4	0.007643773292819751	2
KCNT2	1.0961726161192238	3.348611726689223	8.121752693708704e-4	0.007654993222262117	2
SLC4A11	1.0094416941226285	3.346906113248216	8.171888236773787e-4	0.007695048413660159	2
TBCD	0.32543385385798246	3.346665959147839	8.178970448014054e-4	0.007695048413660159	2
EFCAB6	0.6260758655583597	3.346460228190602	8.185042039568269e-4	0.007695048413660159	2
PARP4	-0.37951	-3.34515	8.223724732841739e-4	0.007724874425443471	2
HIST1H2BC	-1.18489	-3.34223	8.310886186899611e-4	0.007798700018668108	2
ZNF444	0.5086854709131811	3.3418330888518017	8.322709144905592e-4	0.007798700018668108	2
GRINA	-0.720893	-3.34181	8.323389644349912e-4	0.007798700018668108	2
MPPED2	1.0202334486252347	3.340738300612239	8.355594105749676e-4	0.007822273301529396	2
CLEC11A	0.9057347409515447	3.340387840236674	8.366146582838532e-4	0.00782555396034172	2
TATDN3	-0.399347	-3.34013	8.373945319553767e-4	0.007826255461532447	2
PLXNB2	0.5684522458263158	3.3393522499338437	8.397400825092727e-4	0.007841576228848153	2
PSME3	-0.342026	-3.33818	8.432955905842819e-4	0.00786533267891549	2
DCLK2	0.7601924488977461	3.338044977419383	8.4370091151836e-4	0.00786533267891549	2
RGS17	0.923519141456375	3.337155637352178	8.464053674716259e-4	0.007878179406696332	2
STX2	0.5053260986867797	3.337125200716727	8.464980664855196e-4	0.007878179406696332	2
PIK3CB	-0.365374	-3.33609	8.496612941725736e-4	0.007891334147368305	2
PRKRA	-0.301365	-3.33603	8.498533372816195e-4	0.007891334147368305	2
CXCL5	-1.62921	-3.33596	8.500437395525977e-4	0.007891334147368305	2
ENO3	-0.709121	-3.33489	8.533415720329537e-4	0.007913829091280798	2
PDE7A	0.31196183819085105	3.3347072622070564	8.538923940695665e-4	0.007913829091280798	2
NCBP2	-0.286391	-3.33253	8.605985244986836e-4	0.007969328955386892	2
PPP2R5C	-0.299392	-3.33133	8.643204210288696e-4	0.007997124695569615	2
LRCH1	0.3793883648917196	3.3308797408131876	8.657199407144488e-4	0.008003404247920504	2
NDUFA10	-0.223265	-3.328	8.747272141123887e-4	0.008075507116299835	2
PTCD2	0.4018477204276865	3.3279187260338077	8.74973886418869e-4	0.008075507116299835	2
ZNF512	0.31691776929175025	3.327635057847904	8.758652207910114e-4	0.008077019556846013	2
TOM1L2	0.35440336453222065	3.327252369008893	8.770690290778385e-4	0.008081408655478208	2
ITPKB	0.4640617327449141	3.3265358963715124	8.793269323678956e-4	0.008095494966899456	2
UBALD2	-0.502748	-3.32456	8.855859122820232e-4	0.008146363201381361	2
HNRNPU	-0.301554	-3.32409	8.870824554745129e-4	0.008153374588686686	2
MFGE8	-0.766473	-3.32174	8.945699121181276e-4	0.008212560617527604	2
NDUFAF2	-0.344703	-3.32141	8.956459465083329e-4	0.008212560617527604	2
ARNTL2	0.6314638319660499	3.3213781431915916	8.957408725412888e-4	0.008212560617527604	2
CLMN	0.4758274607725237	3.3195350602468205	9.016748160765329e-4	0.008260144787869428	2
RARA	-0.57468	-3.31917	9.028694519321123e-4	0.008264270012203005	2
RASSF5	-0.550892	-3.31887	9.038097301618751e-4	0.008266062136727594	2
ANKRD22	1.2700989394164217	3.3181538124483296	9.061457075277115e-4	0.008280605589037185	2
EPHA2	0.9927986123448097	3.3172803938104307	9.089834265194817e-4	0.0082997064018468791	2
MSC-AS1	0.8231224768843339	3.3160906789457383	9.128620360129119e-4	0.00832827213299208	2
PRSS12	1.2426754865731169	3.3157326803755867	9.140321516271075e-4	0.008332100968403757	2
LCA5	1.006241307325952	3.314654324682462	9.175651531710144e-4	0.0083574453614912	2
CBY1	0.5645037549988371	3.314179057436208	9.191262786310152e-4	0.008364530508384765	2
SPINT2	0.40200160374561933	3.313617432197783	9.209742394699832e-4	0.008364530508384765	2
TRPM4	0.42600874174467607	3.313542192796538	9.212220670811676e-4	0.008364530508384765	2
ANAPC7	0.2651493936271274	3.3133733676474417	9.217783774001002e-4	0.008364530508384765	2
FIGNL1	0.4893657868315477	3.313149570628535	9.225163101097932e-4	0.008364530508384765	2
TMEM8B	0.8479208764203723	3.3130444311478153	9.228631786698493e-4	0.008364530508384765	2
PCGF2	0.671501342942841	3.312012995902748	9.26272428935099e-4	0.008388583016693643	2
RPS14	-0.355637	-3.31149	9.28018295342071e-4	0.008397544525821529	2
MDM2	-0.434745	-3.31025	9.321410452030017e-4	0.00842798210495841	2
HS3ST3B1	-0.801062	-3.30884	9.36837010472518e-4	0.008458624631048975	2
RPLP0	-0.386186	-3.30877	9.370537959281491e-4	0.008458624631048975	2
KRT15	2.5080513259924353	3.307959156952599	9.397851447122619e-4	0.008475089435938289	2
MPLKIP	-0.302572	-3.30777	9.404044118775082e-4	0.008475089435938289	2
CLN3	-0.332593	-3.30717	9.424445424538003e-4	0.008486171572062502	2
NFATC2	0.7592614964231508	3.3069543154418244	9.43162723581476e-4	0.008486171572062502	2
SUPT4H1	-0.463059	-3.305	9.49770143310925e-4	0.008538702753992874	2
RGS10	0.4047288620152784	3.304700571161473	9.507791816623705e-4	0.008540858619738915	2
TRERF1	0.710498077184538	3.304186981531473	9.525227939388181e-4	0.008547072784020527	2
GOLGA7	-0.391965	-3.3038	9.538345157584962e-4	0.008547072784020527	2
B2M	-0.66051	-3.30346	9.549972432457168e-4	0.008547072784020527	2
FPGS	-0.366927	-3.30344	9.550493142946558e-4	0.008547072784020527	2
POC1A	0.7379575406312495	3.3033648836901155	9.553199428055005e-4	0.008547072784020527	2
CAPN7	-0.268788	-3.30298	9.566341028330495e-4	0.008551939165664532	2
RIT1	-0.456066	-3.30231	9.589129444979745e-4	0.008565414660306527	2
LSM6	-0.440903	-3.30115	9.629107858640834e-4	0.00859421097704897	2
MARC1	-0.719318	-3.30062	9.647144294306066e-4	0.008603393020054638	2
M6PR	-0.315222	-3.29937	9.690297750768382e-4	0.008629731274120112	2
RARRES1	0.903959520397912	3.299311698531159	9.692222731539025e-4	0.008629731274120112	2
ZFC3H1	-0.289797	-3.299	9.703022230891007e-4	0.00863242434531914	2
MBD4	-0.341669	-3.29857	9.717935581842374e-4	0.00863419673063558	2
JUP	0.7599274070843784	3.2984305339202744	9.722693359237263e-4	0.00863419673063558	2
SH3GLB2	0.5742915837940317	3.2982674131243206	9.72834378998929e-4	0.00863419673063558	2
ZC3H12A	-0.612857	-3.29775	9.746177089770113e-4	0.008643115353651563	2
CCDC69	-0.423583	-3.29598	9.80804065706176e-4	0.00867757857146295	2
LINC01355	0.6820207456389328	3.2959141909257155	9.81019744483657e-4	0.00867757857146295	2
CXADR	0.8931002624956312	3.2957804082224977	0.00098148699992352045	0.00867757857146295	2
SCAMP4	0.3273880837681897	3.295739456287167	9.816300716704914e-4	0.00867757857146295	2
LMAN1	-0.368404	-3.29304	9.91109126250349e-4	0.008754403045948787	2
NSMCE1	0.379382941375282	3.2926503470492117	9.924781786758543e-4	0.008754774481495952	2
SPRYD7	-0.274162	-3.29258	9.927281880756015e-4	0.008754774481495952	2
TRAF3IP1	0.4621985022583561	3.292126468938622	9.943288659862277e-4	0.008761931269083402	2
PIGC	-0.242085	-3.29136	9.970515968573284e-4	0.008778956288585977	2
KIF4A	1.3193322962434775	3.2906016276331913	9.997338234022399e-4	0.008795597972452511	2
CD99L2	0.3485049725946302	3.2894345501427464	0.0010038890116092524	0.008821749455708646	2
SIAH2	-0.495035	-3.28932	0.001004295353689609	0.008821749455708646	2
SEC11C	-0.407789	-3.28688	0.001013057865773206	0.008883586125388062	2
AIFM2	-0.523786	-3.28673	0.0010135708282778457	0.008883586125388062	2
SH3PXD2A	0.4858025857101759	3.2866867399208624	0.0010137353526854611	0.008883586125388062	2
WHAMM	-0.382345	-3.285	0.0010198313297476137	0.008929958402356273	2
ZNF385B	-1.16586	-3.28472	0.0010208474991940176	0.008931812280182172	2
DUS3L	-0.453715	-3.28316	0.0010265155738709618	0.00897433261156637	2
C1orf52	-0.271668	-3.28271	0.0010281403371447814	0.008981465116694341	2
USP33	-0.269295	-3.28223	0.0010298899227489942	0.00898967595305195	2
LRP12	0.5735949811015482	3.281926500967269	0.0010310047508903125	0.008992337587694531	2
SCFD1	-0.286639	-3.28051	0.0010361776229547114	0.009030361183411429	2
SAP18	-0.522385	-3.28025	0.0010371588403683876	0.009031823219302125	2
ASGR2	-1.17457	-3.27901	0.0010417147144295433	0.009064387519052681	2
WDR34	0.6452651013783578	3.278660691796806	0.0010430096255418313	0.009068548059820637	2
SCML1	-0.46469	-3.27787	0.0010459262085049208	0.009080338559208881	2
PSPC1	-0.243957	-3.27783	0.0010460948762946658	0.009080338559208881	2
SERF2	-0.348503	-3.27763	0.0010468191800222795	0.009080338559208881	2
TBP	-0.255278	-3.2766	0.0010506571158048054	0.009106515188743758	2
DPY19L4	0.3472003232147095	3.2756287942869236	0.0010542703109032334	0.00913070457251061	2
CRNKL1	-0.377047	-3.27476	0.0010574990685919266	0.009151529351968947	2
FBXO8	-0.338525	-3.27399	0.0010604203951541963	0.009169663276788973	2
2025-03-09	0.6883784573223383	3.272344454292257	0.00106659543518311	0.009214372776418284	2
SAT2	-0.380198	-3.27217	0.00106725059807925	0.009214372776418284	2
CYB5R4	-0.405136	-3.26731	0.001085728405923677	0.009366621982106128	2
SF3B5	-0.440466	-3.26637	0.001089346488134622	0.009383488489771696	2
AMY2B	-0.400612	-3.26598	0.0010908742749082335	0.009383488489771696	2
SLC40A1	0.9934394829271228	3.265863319653344	0.0010913091009943923	0.009383488489771696	2
CEP126	0.5555015799865584	3.265772216581649	0.0010916602366401423	0.009383488489771696	2
CRACR2B	0.6907819712392088	3.2657076555890288	0.0010919091352593923	0.009383488489771696	2
BCL10	-0.395709	-3.26312	0.0011019451381315381	0.00946035755162014	2
HBB	-2.25777	-3.26296	0.001102558107880434	0.00946035755162014	2
POLE2	0.6580797621682375	3.2614655791446947	0.0011083788831176347	0.009502958099810886	2
GCHFR	-0.754884	-3.26052	0.0011120660111460432	0.00951782181852629	2
ATP6AP1L	-1.07959	-3.26044	0.0011123849106850576	0.00951782181852629	2
HBEGF	-0.543648	-3.26037	0.001112684204309387	0.00951782181852629	2
TPP2	-0.234322	-3.26009	0.001113787317278813	0.009519923467087498	2
NDUFA7	-0.519588	-3.25892	0.0011183888822497018	0.009551901353552645	2
DAAM2	-0.821359	-3.25831	0.0011207642614687045	0.009564831356715623	2
RAB3IL1	0.9409864669084561	3.257308709016767	0.001124740382817167	0.009588413752270172	2
LENG1	-0.444105	-3.25718	0.0011252547166718935	0.009588413752270172	2
CATSPERB	0.9610361305933047	3.256811438918899	0.0011267125280847862	0.00959347331236609	2
PLXNA4	1.0075071829964057	3.256517886285946	0.001127878241497875	0.009594653053650374	2
ZRSR2	-0.347146	-3.25634	0.0011285793828755641	0.009594653053650374	2
PHACTR1	-0.545512	-3.25579	0.0011307624309819006	0.009605857131746016	2
TM4SF19	0.9121334793088848	3.255084770852701	0.0011335852461201573	0.009617885753253952	2
TRNT1	-0.24916	-3.255	0.001133910875529985	0.009617885753253952	2
PCOLCE2	-1.19681	-3.25452	0.0011358299229494119	0.009626808881303298	2
PCIF1	-0.406929	-3.25414	0.0011373640427288874	0.009632458403065475	2
SLC24A3	0.8143665121018059	3.2532128691016466	0.0011410798100500658	0.009656561837641678	2
STEAP3	0.43742442824095745	3.2528509908925547	0.0011425339404331598	0.009661503686694115	2
PSMA3	-0.338489	-3.25187	0.0011464941457902998	0.009687613775273744	2
DOCK8	-0.506452	-3.25054	0.0011518743706091016	0.009725673868344376	2
BICC1	1.0196760394410314	3.24753510795137	0.0011640930162249794	0.009821371397527314	2
PARM1	0.7723858866371875	3.246881588622709	0.0011667692216322096	0.00983647582975127	2
EPB41	-0.348142	-3.24555	0.0011722367631783522	0.009867779920597747	2
SGF29	-0.392531	-3.24533	0.001173128065817952	0.009867779920597747	2
PSMG3-AS1	0.6767052181753996	3.2453051173556036	0.0011732483945097183	0.009867779920597747	2
FAM204A	-0.296852	-3.24511	0.0011740374020633726	0.009867779920597747	2
RPL15	-0.483144	-3.24249	0.0011848992588379707	0.009942583115209031	2
MCM3	0.46734523124341243	3.2424624338366543	0.0011850156964722078	0.009942583115209031	2
SH3BP1	-0.605289	-3.24224	0.0011859297376350332	0.009942583115209031	2
GTF2F1	-0.280105	-3.24201	0.0011869112145250031	0.009942583115209031	2
ELF5	1.0043233134377834	3.2417733565182143	0.0011878845087266328	0.009942583115209031	2
CCDC141	-1.14823	-3.24167	0.0011883101678719613	0.009942583115209031	2
PELI1	-0.529463	-3.24104	0.0011909596781325923	0.009957247971616094	2
MRAS	0.4758555999499845	3.2407435295044418	0.0011921839154399678	0.00995998345607973	2
C19orf48	-0.362057	-3.24012	0.0011947861800012264	0.009974218764326028	2
LAMTOR3	-0.473815	-3.23589	0.0012126488326531467	0.010115732523627264	2
EFCAB13	0.5415020331196237	3.235534680985257	0.0012141513483655687	0.010120662478155337	2
EIF2S3	-0.252956	-3.23488	0.0012169176242512	0.0101361113143744	2
YBX1	-0.393527	-3.23411	0.0012202136692728365	0.010155946304300077	2
SLC9A7	0.5754311064932925	3.2327622167146255	0.0012259956326758055	0.010196426598950913	2
CCSER1	0.8464554454362028	3.2319758189277437	0.00122937458910045	0.010203144190786535	2
C21orf58	0.8305745535076842	3.231966159809356	0.0012294161453561435	0.010203144190786535	2
NBPF12	-0.392375	-3.23193	0.0012295602024022683	0.010203144190786535	2
CRIP2	0.774244993581086	3.2307245941633687	0.001234768525030657	0.010238711675440914	2
GNA14	0.8030160468761285	3.2277745718561706	0.0012475724740750596	0.01033357613839098	2
KIF16B	-0.55724	-3.22766	0.0012480703955311452	0.01033357613839098	2
HLTF	0.32059576080459773	3.2267672828578804	0.0012519724015905038	0.010358159146691031	2
MTHFD2L	-0.364699	-3.22641	0.0012535324910270197	0.010363344190523455	2
DNAH6	1.15253915402896	3.2242077813046937	0.0012632170702245962	0.01043563923415453	2
MIR4435-2HG	-0.516439	-3.22385	0.001264816275750084	0.010441081865913148	2
EPHX2	1.0724130788740145	3.22306382543947	0.0012682729043807497	0.010461838081232884	2
KAZN	0.5956146546330922	3.2224725373567193	0.0012708934819948656	0.010475672108826274	2
KCTD21	0.5592826860492083	3.221950286403703	0.0012732122448418123	0.010486999669494542	2
KIAA1324	1.448266215861962	3.221683770819477	0.0012743970625280598	0.010488977453854003	2
COL6A2	1.0440716935560936	3.2213803029688326	0.0012757473939056078	0.010492313566321455	2
GPANK1	-0.324287	-3.22004	0.0012817321954322384	0.010530042569720188	2
ADAM15	0.41700139511785517	3.219709917053098	0.0012832037310937044	0.010530042569720188	2
ZNF496	0.3840841216735039	3.219700325311535	0.0012832466630249462	0.010530042569720188	2
TRABD2A	0.5087356155865187	3.2192966960039975	0.0012850544804624026	0.010530042569720188	2
MELK	0.9273427580961643	3.2192871718182907	0.001285097166764541	0.010530042569720188	2
DKC1	-0.265731	-3.21908	0.0012860251935999797	0.010530042569720188	2
VPS28	-0.409514	-3.21849	0.0012886807474624185	0.01054401056674667	2
EDN1	0.9202139163416302	3.217398654161825	0.0012935871920342695	0.01057396802164452	2
TCF3	0.36174018881539566	3.2172524041825072	0.0012942468289124476	0.01057396802164452	2
SAT1	-0.580359	-3.2166	0.0012971778025675268	0.010582413088996646	2
AIMP1	-0.272022	-3.2166	0.001297186725580873	0.010582413088996646	2
ABTB1	-0.411109	-3.21537	0.0013027631233537842	0.010616671383041643	2
RNF166	-0.545843	-3.21525	0.001303298486452829	0.010616671383041643	2
BDH2	0.47612792257216535	3.214111050909965	0.0013084905611371355	0.010650165028973693	2
RPS19BP1	-0.447761	-3.21393	0.0013093285836755014	0.010650165028973693	2
TMEM176A	0.888583267152094	3.2135243909822453	0.0013111666113917874	0.010657308115873364	2
GSE1	0.3500753025236861	3.2122634451911174	0.0013169355201933161	0.010696368018073438	2
MRVI1	1.256248596658319	3.2119214911753797	0.0013185040142379507	0.010701279290997052	2
PSMC1	-0.356128	-3.21059	0.0013246377955504734	0.010743209235936382	2
TCTN1	0.48362364634110866	3.2101259285609607	0.0013267683300911721	0.010752634137957873	2
U2SURP	-0.236056	-3.20917	0.0013311834202097295	0.010780546691895423	2
STXBP2	-0.6573	-3.20818	0.0013357700265032395	0.010809806562875706	2
CPT1B	-0.810355	-3.20634	0.00134433669600072	0.010871209275816454	2
COX19	-0.312895	-3.20464	0.0013523014089546661	0.01092349700306476	2
ST14	0.4782251802122016	3.204543115536085	0.0013527702764310585	0.01092349700306476	2
KATNAL2	0.7313426377869369	3.20395570900155	0.001355533281210622	0.010934292889794665	2
P2RX4	-0.550667	-3.2037	0.0013567531141124426	0.010934292889794665	2
SPINT1	0.6110992335943337	3.2036312547039065	0.0013570616592035532	0.010934292889794665	2
IL1RAP	-0.692096	-3.20341	0.0013581224426157286	0.010934904626803797	2
P2RY6	0.8911283525260567	3.2031933994707043	0.0013591267450354118	0.01093506105081752	2
NFIA	0.5821227029691092	3.20174257729062	0.0013659900873865902	0.010982322911117531	2
CD46	-0.335907	-3.20122	0.0013684794248151955	0.010994375581565208	2
ARMCX2	0.54904947361535394	3.2004312520284706	0.0013722210083408919	0.0110164641038387	2
PDLIM1	0.5700851500669859	3.198206500764032	0.0013828521789843566	0.011093791722011064	2
TMEM30A	-0.334097	-3.19733	0.0013870466510824961	0.011119407196367477	2
EXOSC3	-0.322974	-3.19619	0.0013925503430039878	0.011155473635189954	2
CEP97	0.5306161721297705	3.195055597418447	0.0013980390589637573	0.011191368184336407	2
FABP4	-1.3797	-3.19483	0.0013991251799562497	0.011191993424390664	2
TCTN3	0.33362853356823663	3.1944028255990116	0.0014012044895018489	0.011196001421987447	2
C2CD2	0.3611209710915876	3.194312508353184	0.0014016429772640323	0.011196001421987447	2
MLLT3	0.6131900794267883	3.192927974504091	0.0014083807071081113	0.011241733278951373	2
DNAAF1	0.954094568694012	3.1918369774426134	0.0014137109854531784	0.011276173183539252	2
TRANK1	0.38643741721437347	3.191140698510968	0.0014171225079625883	0.011292142014678291	2
HNRNPK	-0.253689	-3.19101	0.001417747092539092	0.011292142014678291	2
CWC25	-0.365133	-3.18942	0.001425604044885991	0.01134658187123237	2
ATP2B1	-0.558183	-3.18851	0.001430092022860112	0.011374148803592997	2
CCDC47	-0.342304	-3.18816	0.0014318352483612654	0.011379861676846906	2
SNX10	-0.533432	-3.18764	0.0014343759302502613	0.011384294977824937	2
KRT19	1.1327704695718501	3.1875857317845537	0.0014346592039768985	0.011384294977824937	2
TXNRD3	0.6162813680106273	3.187422530654069	0.0014354690596194643	0.011384294977824937	2
ZNF559	0.5176714492750661	3.1868144038392376	0.0014384904894210388	0.011400114135647248	2
CHCHD2	-0.427387	-3.18477	0.001448672114743539	0.011472615185447583	2
HENMT1	-0.500304	-3.18303	0.0014574401304842694	0.011533825922143153	2
RPL14	-0.323845	-3.18251	0.0014600439563500782	0.011546202312930853	2
BTAF1	-0.273863	-3.18137	0.001465818047723599	0.011576336160646466	2
TKT	-0.372417	-3.18134	0.0014659397137592482	0.011576336160646466	2
ITSN2	-0.267818	-3.18092	0.0014680632858938196	0.011584866143055492	2
CLU	0.8719073216626648	3.180210913265291	0.001471678958007269	0.011605150192297378	2
KIAA1143	-0.299353	-3.17999	0.0014728107878204972	0.01160583263106528	2
NAT9	-0.37694	-3.17965	0.0014745369268943482	0.011611193971140387	2
OR2A1-AS1	-0.718329	-3.1779	0.0014834482695648711	0.011665253584732443	2
TEX30	-0.535865	-3.17789	0.0014835033830174016	0.011665253584732443	2
UBQLN1	-0.278001	-3.17718	0.001487142027721643	0.01168077602383815	2
ENOX1	0.8268472322067439	3.1770952919643785	0.0014875814912822792	0.01168077602383815	2
DDX19B	-0.320143	-3.17624	0.001491965713902446	0.011706922488663505	2
OTUD7A	-0.434934	-3.17603	0.001493031621803302	0.011707012780283941	2
FAM122C	0.3617045358264583	3.175195710925482	0.0014973547360421925	0.011732625006546551	2
RPGRIP1L	0.6527325330962938	3.1743670056766415	0.0015016368855814025	0.011757880353039712	2
FARP1	0.4157632676071967	3.1729773245330994	0.0015088430835036688	0.011790386230464616	2
PIGZ	0.5597928328354324	3.1729611015758814	0.001508927395525642	0.011790386230464616	2
MGLL	0.5800432068113415	3.172952125637737	0.0015089740460677492	0.011790386230464616	2
MAATS1	1.059503842088701	3.171856836271558	0.0015146765643075531	0.011826620178274797	2
CHD1	-0.419537	-3.17145	0.0015168084888589144	0.011834943536050968	2
ETV3	-0.418983	-3.16998	0.0015244694714136031	0.011886365548528958	2
MSI2	0.4693656487569744	3.167085199906852	0.001539751995753747	0.011997099234283406	2
ZNF562	0.294189707495946	3.1659031548848175	0.0015460225689672513	0.012037509525416124	2
FBF1	0.6145651752900996	3.1655822723380607	0.0015477288571875728	0.012042350035987122	2
CEBPG	-0.320057	-3.16525	0.0015495197047603398	0.012047841233861382	2
NBPF14	-0.562003	-3.16466	0.0015526465022494486	0.012061510685156563	2
PRPF3	-0.298248	-3.16451	0.0015534504440037724	0.012061510685156563	2
EBF4	0.9411808436374915	3.163800245687494	0.0015572363577610634	0.01208026356305268	2
LILRA2	-0.749136	-3.16365	0.0015580417384753163	0.01208026356305268	2
MRPS5	-0.276235	-3.16277	0.0015627311607658869	0.01210031878179786	2
KCTD1	0.9146348868167474	3.162760583816025	0.0015628079918128552	0.01210031878179786	2
COG7	0.308075932947296	3.1602204225245405	0.0015764982270656833	0.012195349220349894	2
NCF2	-0.554987	-3.16008	0.0015772783464309149	0.012195349220349894	2
ZNF561	0.43180516392795	3.1596711482454967	0.0015794730305802838	0.012203819804128666	2
COX7A2L	-0.307378	-3.15924	0.0015818061575800955	0.01221334754354089	2
FTL	-0.596609	-3.15873	0.0015845561524614562	0.012226078499499339	2
NBPF19	-0.706843	-3.15852	0.0015857187671257272	0.012226552410692326	2
CSRNP2	0.4183103104390897	3.1582966042666514	0.0015869400588078137	0.012227477774422731	2
KMT5A	0.34223177201863586	3.1568904820285053	0.0015946122472794478	0.012278071970557356	2
CORO1A	-0.769602	-3.15657	0.0015963887077845018	0.012281329131760738	2
LRRFIP1	-0.372598	-3.15641	0.0015972475246566248	0.012281329131760738	2
RPL11	-0.328148	-3.15579	0.0016006320723235983	0.012298835916269143	2
SERTAD3	-0.483619	-3.15488	0.0016056625021758871	0.012328956266707382	2
MTMR6	-0.4009	-3.1524	0.001619340248349984	0.012414527086857965	2
RDH5	0.6409762007150779	3.1523663686394046	0.0016195293128088018	0.012414527086857965	2
KLF12	0.5514713331030124	3.1522524748326552	0.0016201611950695481	0.012414527086857965	2
STK26	-0.517682	-3.15135	0.0016252027633693192	0.01244456984944107	2
XRCC1	0.3855538635232239	3.151038751923694	0.0016269090310549992	0.012449049601518715	2
PFDN2	-0.458781	-3.15034	0.001630820065790089	0.012470382362580823	2
SPINK5	1.292173216759211	3.1490073253661883	0.0016382608861207184	0.012518658374809592	2
TREM1	-0.835485	-3.14828	0.00164232136976905	0.012536749132101822	2
ISY1	-0.262928	-3.14818	0.0016428866060711656	0.012536749132101822	2
CRELD1	0.4864874171692739	3.1479340827793316	0.00164428767887566	0.012538822869887674	2
MAD1L1	-0.336733	-3.14598	0.001655333838091276	0.01261289772205812	2
ATP11B	-0.36622	-3.14569	0.0016569645774164063	0.01261289772205812	2
MXD4	0.4602459999022146	3.1456098309445704	0.0016574095088248938	0.01261289772205812	2
JADE1	0.4343050136996005	3.1439182370273118	0.0016670201006199635	0.012677345326837983	2
ITGB4	1.405514043696542	3.141826490074781	0.0016789750070892368	0.012759520536421489	2
CCL18	1.0984800084497097	3.1416074958414666	0.0016802311693280487	0.012760332881702686	2
U2AF1L4	-0.385237	-3.14096	0.0016839540872650809	0.012779864819483386	2
CTSK	0.8761916413274436	3.1405594194424054	0.0016862549686166683	0.012788585325512887	2
EFTUD2	-0.276279	-3.14031	0.0016876634556682393	0.012790530613163455	2
ANLN	0.9549389223489396	3.1397720180821067	0.0016907936050038965	0.012805512548675485	2
BLOC1S1	-0.378027	-3.13951	0.0016922785486980648	0.012808022308244453	2
WDR91	0.3739426436614914	3.139158780474068	0.0016943361300594305	0.01281485970848083	2
SLC37A2	0.5359813903461612	3.138128064070845	0.0017003057135006312	0.012851255505103817	2
HSPA12A	0.7859413253026696	3.1367842348117745	0.00170811780121876	0.012901518331246186	2
KCNMB1	0.5163908083037373	3.136552531722004	0.0017094680936171555	0.012902137939875626	2
EVI2B	-0.563753	-3.13637	0.0017105239167339388	0.012902137939875626	2
SLC31A2	-0.511085	-3.13581	0.001713830075774578	0.012909688393508669	2
ADAM17	-0.532066	-3.1358	0.0017138503730551903	0.012909688393508669	2
RPN1	-0.312939	-3.13515	0.0017176633311149565	0.012929637942623296	2
SH3BP2	-0.446248	-3.13481	0.0017196509376727772	0.012935829512859652	2
TCF4	0.596994530261602	3.1336682943643432	0.0017263588895327492	0.01297749678434808	2
NAPG	-0.273173	-3.13185	0.0017370821621557296	0.013044534604699282	2
ROBO1	0.8801208705835553	3.1317586613389294	0.0017376264685535657	0.013044534604699282	2
PLA2G4C	0.5988249647435877	3.1303471303154784	0.0017459984742624242	0.013098527743064659	2
INTS9	0.356692226452712	3.130076078513501	0.0017476103624576912	0.013101767626176736	2
ZNF692	0.4891529677325067	3.1298005968921676	0.001749249995713634	0.013105211000275625	2
GZF1	-0.484823	-3.12869	0.0017558609236124688	0.013145869072737182	2
KCNJ2	0.6116174624868547	3.126890444358342	0.0017666574700858299	0.013217788335824104	2
KBTBD8	-0.764636	-3.12631	0.0017701670411708434	0.01323512771590564	2
DNM1	0.7433230839604648	3.124678219572221	0.0017799965833923245	0.01328452849673847	2
TEX9	1.0383892435203046	3.12458369788367	0.0017805685804984375	0.01328452849673847	2
GFOD2	0.356550552498591	3.124424495483998	0.0017815323742847423	0.01328452849673847	2
FLRT2	1.0876815356340783	3.1244159259517583	0.0017815842668874235	0.01328452849673847	2
EI24	0.3144494250898898	3.124174825706274	0.0017830448133779053	0.01328452849673847	2
GNAO1	1.199466354586726	3.124024970809441	0.0017839531647876302	0.01328452849673847	2
SUSD4	1.342932985329065	3.123731454173821	0.0017857335601500412	0.013288873805861868	2
ZFHX3	0.28773295618114153	3.120048645225909	0.0018082117587851357	0.01344713674332978	2
IDH1	-0.57523	-3.11957	0.0018111456620734287	0.013459939950469397	2
NR2F2-AS1	0.9951228588013338	3.1185047291043198	0.0018177122489404698	0.013490477901594347	2
ZKSCAN8	-0.420991	-3.11819	0.0018196561789971186	0.013490477901594347	2
ZSCAN30	0.4412587335449713	3.118034987148448	0.0018206118953081637	0.013490477901594347	2
ANTXR1	1.1060989921449722	3.1179893725748133	0.0018208936935084426	0.013490477901594347	2
HSPA6	0.8269679752577874	3.1179187695661814	0.0018213299445636248	0.013490477901594347	2
CUTC	-0.365796	-3.11652	0.0018300112784080756	0.013541991426343538	2
MIR99AHG	0.7413342312316983	3.116402182585357	0.0018307240503414978	0.013541991426343538	2
ZNF428	0.3592909311231183	3.116084540498026	0.0018326972325567329	0.013542153299121697	2
ACP5	-0.619805	-3.11601	0.0018331853020426832	0.013542153299121697	2
ZNF680	0.3775077054473472	3.1156675911318223	0.001835290274474412	0.013548688774926461	2
LRRC40	-0.358471	-3.11526	0.0018378350317980502	0.01355846003857392	2
DYRK2	0.4471041313150482	3.1134827667259106	0.0018489330736037313	0.013631277500811573	2
DPH5	0.3334991466838574	3.112414514724272	0.0018556374693241972	0.013671627619048814	2
EIF4A3	-0.622576	-3.11072	0.0018663436433932312	0.013741388244426422	2
ZDHHC6	-0.250419	-3.11025	0.0018693029193198052	0.013754055873563814	2
SH3RF2	0.9278563766228322	3.109944238184687	0.001871226658627709	0.013759092444200961	2
DUSP11	-0.290534	-3.10948	0.001874142589071531	0.013771413081708279	2
COL13A1	1.0960784935277461	3.106428415364032	0.0018936215048335713	0.013896697900621417	2
NPAS3	0.8985177975125096	3.1064168229222857	0.0018936957510258673	0.013896697900621417	2
UBE2D3	-0.357144	-3.10555	0.001899235634930012	0.01392814613912016	2
NAALADL2	0.6491760549845038	3.1049954229292527	0.001902819690672873	0.013945219158772879	2
SRD5A1	0.38948122776317984	3.10476855254072	0.001904279698016795	0.013946713381979205	2
NCR3LG1	-0.403488	-3.10396	0.001909471817078818	0.013975521150313855	2
L3MBTL3	-0.516238	-3.10231	0.0019201583715685992	0.014044478524062026	2
FUBP1	-0.280851	-3.10157	0.001924948897768596	0.014066592826336903	2
NKAP	-0.281986	-3.10128	0.001926882911267045	0.014066592826336903	2
LAPTM5	-0.498118	-3.10126	0.0019269825892874386	0.014066592826336903	2
ANXA7	-0.248407	-3.10004	0.001934950579681559	0.014115477191987089	2
ISOC1	-0.378994	-3.09976	0.0019367989621570636	0.014119684095095127	2
TTC1	-0.263123	-3.09951	0.0019383961251078763	0.014122055234299704	2
ARFGAP3	-0.319308	-3.09469	0.001970216245737629	0.01434446621404911	2
COL9A2	0.550304778931407	3.0935549057144835	0.001977739533532829	0.01438980474496396	2
RBM33	-0.18048	-3.09322	0.001979964549082625	0.0143965595209328	2
SNIP1	-0.366897	-3.09026	0.001999825975591388	0.014531457988868573	2
DDX27	-0.377891	-3.08815	0.0020140721368991283	0.01462540414387902	2
GABPB2	0.3081237216458553	3.087282655415788	0.0020199542551041037	0.01465853078066723	2
FAM214B	-0.477316	-3.08626	0.0020269260157981927	0.014699516364080557	2
IDH3B	-0.38179	-3.08582	0.002029931397686813	0.014704834501546048	2
SUPT6H	-0.289294	-3.08576	0.0020303081411213266	0.014704834501546048	2
TRAM2	0.466588585533106	3.0846786489707	0.0020377219024915235	0.014748047928423698	2
NNMT	0.592700075317548	3.084502167841192	0.00203893124111775	0.014748047928423698	2
TMEM128	-0.418409	-3.08398	0.002042525766624354	0.014764429418509247	2
NRXN3	1.1811101093848795	3.083543325707542	0.002045513232016885	0.014776404303892956	2
TMEM33	-0.425268	-3.08263	0.002051819028717447	0.014812319035012884	2
PCSK9	-1.23485	-3.08222	0.002054647463386562	0.014821985857857765	2
LINC00623	-0.439089	-3.08205	0.002055827994334951	0.014821985857857765	2
KRAS	-0.32263	-3.08029	0.002067956987139896	0.01489975757833502	2
APIP	-0.6192	-3.07913	0.0020760543797271234	0.014948399337295883	2
TLR4	-0.559763	-3.07834	0.002081597140863321	0.014976547156778075	2
IRS1	0.8163071441879614	3.0781842076992105	0.0020826613356809283	0.014976547156778075	2
YEATS2	0.27950060408364763	3.0776869762091046	0.0020861392078915567	0.014991847006614855	2
EPS8L1	0.8001499003975239	3.0773149251383964	0.0020887449923803884	0.01500086393945631	2
CD84	0.5785401303926118	3.0765630782018856	0.002094019919157509	0.015029025961477585	2
AKIRIN1	-0.287986	-3.07621	0.002096485595695283	0.015035034946032312	2
CCT8	-0.365321	-3.07606	0.0020975654446009234	0.015035034946032312	2
ACP2	0.5537167281711274	3.075174360318342	0.0021037952441507217	0.01506996038439062	2
SUPT16H	-0.309241	-3.07448	0.0021087289418923343	0.01508937429864013	2
CPT1A	-0.320317	-3.07441	0.00210922353521476	0.01508937429864013	2
MSMO1	-0.717611	-3.07365	0.0021145899538561478	0.015118024634684358	2
DPF3	0.7007327375572909	3.073315651530321	0.0021169443796018083	0.015125118048081644	2
CEP44	-0.359789	-3.07304	0.0021189276456383003	0.015129552186187811	2
EMC4	-0.39543	-3.07233	0.0021239558124200825	0.015155707831169778	2
CIAPIN1	-0.249512	-3.07192	0.0021268736175871043	0.015166780845259872	2
PTGS1	0.6909121031917135	3.0716524215126673	0.002128774481924462	0.01517059247291868	2
LINC00511	1.2326297175420244	3.0705896165263833	0.002136365637222362	0.015209428982940575	2
VDAC2	-0.332464	-3.07051	0.002136963812788192	0.015209428982940575	2
ADCY6	0.9263191362600453	3.070166414098379	0.002139395292216036	0.0152169800957557	2
XRN1	-0.290676	-3.06979	0.002142069714773236	0.015222219369447568	2
TOR2A	-0.500319	-3.06968	0.0021428738966447402	0.015222219369447568	2
LUC7L2	-0.235152	-3.06918	0.0021464682430266824	0.01523674595102773	2
SLC2A1	1.0348359594562975	3.0688736498623466	0.0021486744486752737	0.01523674595102773	2
RNF6	-0.328455	-3.06882	0.002149035770450277	0.01523674595102773	2
ARID5B	0.4674457449349306	3.068305158256544	0.002152766616429469	0.01525345739771308	2
ARHGEF9	0.3047352143403414	3.068003800409134	0.002154938774433086	0.0152591104671751	2
ZZEF1	-0.282438	-3.06773	0.0021569213605254355	0.015259450156489327	2
PGM1	-0.329163	-3.06759	0.0021579077813272357	0.015259450156489327	2
ASH1L-AS1	-0.606702	-3.06743	0.0021591098077857096	0.015259450156489327	2
MLX	-0.295785	-3.06705	0.002161819692167869	0.015259754156477831	2
PCNT	-0.343141	-3.06687	0.002163105481488272	0.015259754156477831	2
TEC	-0.408873	-3.06685	0.0021632759652612903	0.015259754156477831	2
ZFAND3	-0.303614	-3.06583	0.002170661556855633	0.015302130327471807	2
SLC26A11	0.5009598675212279	3.065013818650764	0.002176599401761146	0.015334253272686551	2
LYSMD2	-0.519887	-3.06293	0.00219184767587439	0.01543188633179033	2
KIAA0930	0.5281756815219899	3.0624313817483135	0.002195468048845839	0.015438210252859566	2
TMEM50A	-0.383955	-3.06226	0.002196697348380392	0.015438210252859566	2
LZTS2	0.4712852964277155	3.062130339100297	0.0021976773551735697	0.015438210252859566	2
MON1B	-0.368617	-3.06204	0.0021983077015014837	0.015438210252859566	2
ATAT1	0.4237313619738071	3.060675076851635	0.0022083860661362177	0.015490152383090578	2
TXNL1	-0.262474	-3.06066	0.0022084942107927935	0.015490152383090578	2
PBX2	0.3622478269515193	3.060416725726124	0.002210292163096339	0.015492975938673392	2
SH2B1	0.4300370653566517	3.059727106009138	0.002215387516661541	0.015518894383276397	2
LINC00205	0.6525593766905606	3.059487126778799	0.0022171631606959737	0.015521540083989531	2
EID1	0.38462801108956546	3.0592231951236046	0.0022191175384511756	0.015525432910789795	2
B4GALT5	0.43262162268963145	3.058963607402695	0.0022210412898545457	0.015529106701042204	2
VMA21	-0.467306	-3.05842	0.0022250389096601696	0.015547266843270525	2
SHKBP1	-0.410992	-3.05812	0.002227319806297869	0.015553416232280024	2
AGFG2	0.5247321443176952	3.0572606951093593	0.0022336991688878378	0.015588159567669178	2
FAM214A	0.4205160666153975	3.0566948665768647	0.002237919625265553	0.01559715437764302	2
FMO5	-0.740687	-3.05662	0.002238483390207621	0.01559715437764302	2
USP49	0.4197557306685286	3.056523083213846	0.0022392023847575405	0.01559715437764302	2
API5	-0.258851	-3.0563	0.0022408434575397654	0.015598799316027596	2
PRKAA2	1.04929625070705	3.0560724752490347	0.002242570415971397	0.015601039679530339	2
MAGED1	0.47136555338391006	3.0541028498263456	0.0022573467720995674	0.01569400201040795	2
ZMIZ1-AS1	0.8552234650450296	3.0534343867239984	0.00226238189842697	0.0157191653430755	2
RB1	-0.24657	-3.05241	0.002270115944884902	0.01576303773361918	2
PLEKHA6	0.8145109079297305	3.051833021596131	0.00227448588684567	0.01578351050102967	2
BLNK	0.4682626889887905	3.049580596682763	0.0022916113604555194	0.015892417823321445	2
HIPK2	-0.455637	-3.04794	0.0023041953199305935	0.015969713256672523	2
DNAJC8	-0.314808	-3.0463	0.0023167372360820573	0.016046621043180963	2
DNAJB14	-0.274161	-3.04611	0.0023182395007007284	0.01604701569593528	2
FKBP9	0.5009704763218298	3.045916541184539	0.002319722150411623	0.016047274165744703	2
RGCC	-0.661557	-3.04547	0.002323167375688666	0.01606110048086629	2
ZNF207	-0.209758	-3.04402	0.002334412803295968	0.01612880233664912	2
TMEM126B	-0.29649	-3.04375	0.0023365120555152072	0.01613326701018989	2
SLC16A1-AS1	0.36907800661101137	3.042740674460481	0.0023443426556946714	0.016171074870255885	2
EMC3	-0.416731	-3.04267	0.002344900526084119	0.016171074870255885	2
DLGAP1-AS1	0.46508862414155505	3.0421615548627257	0.0023488579184695237	0.01618831127794359	2
ULK2	0.3633093704664766	3.041945283721284	0.0023505461761949417	0.016189897142861315	2
CDK1	0.6364832849668077	3.0411399904219913	0.002356842239851809	0.016223198629308516	2
HEG1	0.547838163114333	3.0403216769470705	0.002363255914407732	0.016257267916771404	2
CHN1	0.7515579297301505	3.039876096708798	0.0023667549431708795	0.016271257048932678	2
ZBTB16	0.6959421518250275	3.038158929241997	0.0023802838322087012	0.016354140711023025	2
CECR2	-0.780228	-3.03793	0.002382129137777289	0.01635534980425717	2
SCNN1G	1.6788631757091614	3.0377639237772107	0.002383405924821048	0.01635534980425717	2
ACVR1	0.3684680750479435	3.0361975633176117	0.002395823260045331	0.016430404976086048	2
CACNA1C	0.9662489931297413	3.035710197180032	0.0023996989217484796	0.01643938735712856	2
LSM4	-0.466894	-3.03566	0.002400094290363451	0.01643938735712856	2
YEATS4	-0.37617	-3.03507	0.0024047861068300807	0.01646136876950332	2
PHB	-0.398668	-3.03287	0.0024223911065949224	0.01657166263494974	2
TCAF1	0.3491352700656972	3.0319576943579443	0.0024297325462639178	0.016611650530276034	2
GPSM3	-0.624818	-3.03168	0.0024319507955514533	0.016616584420312483	2
LACC1	-0.510429	-3.03091	0.002438188207800386	0.01664346887793424	2
DCXR	-0.487167	-3.03082	0.0024388835327748366	0.01664346887793424	2
RMND1	-0.388564	-3.03045	0.0024418862952365694	0.016653724530719675	2
TVP23A	1.1270069485110674	3.030128572564032	0.00244449651676071	0.016657082722988915	2
MIR3142HG	1.0105975446609412	3.030019541361656	0.0024453791622509173	0.016657082722988915	2
IQCK	0.4357505446865665	3.026943044139298	0.0024704050140628734	0.01681723290689153	2
HS3ST1	0.9832776184489159	3.0265936070612125	0.0024732622907155115	0.016825677679948314	2
SREK1IP1	-0.227834	-3.0261	0.002477271391052052	0.016825677679948314	2
FBXO31	0.45390876807691316	3.0260778662873147	0.0024774849242990417	0.016825677679948314	2
HADHA	-0.251543	-3.02605	0.0024777071968581006	0.016825677679948314	2
NUS1	-0.377486	-3.02578	0.0024799461722731686	0.01683058823395415	2
NT5C	-0.325573	-3.02378	0.002496391597119459	0.016931848443993494	2
ZEB2-AS1	-0.610318	-3.02338	0.002499695384392759	0.016943361774772195	2
PLOD1	0.43867745869333885	3.0232033509400864	0.0025011411284203934	0.016943361774772195	2
FUT8	0.4631039748453365	3.021515217531386	0.0025151299772127314	0.017027736668898143	2
ACTR1B	0.331084068751442	3.0209168158919923	0.002520105835247752	0.01704868948331147	2
FBXL15	-0.442653	-3.02077	0.0025212958778345882	0.01704868948331147	2
PAM	0.5030957608942362	3.0202123138413826	0.002525975484691945	0.01706993658340515	2
FIGN	1.0294253020465105	3.018975779081976	0.0025363080776034117	0.0171293361226464	2
TRIOBP	0.31380057251715326	3.0182201416800396	0.002542641265022824	0.01716087958391455	2
UBN1	-0.310804	-3.01805	0.002544069872568076	0.01716087958391455	2
SOX5	1.0076253404763673	3.017465034492171	0.002548984453818322	0.01718359100834537	2
PIGH	-0.388691	-3.01674	0.0025550811346757313	0.01721423897955379	2
FAM161A	0.6924887136277392	3.015969435105968	0.002561590799310387	0.01724763046982609	2
RNF215	0.4552125131240145	3.0156682588125503	0.0025641362883914065	0.01725430618788472	2
TIGD1	-0.435829	-3.01478	0.002571679420738851	0.01729458304570773	2
CCDC82	-0.255795	-3.01373	0.0025805663604493716	0.01733823291006757	2
POR	-0.459182	-3.01365	0.0025812932541062496	0.01733823291006757	2
NFATC3	0.2674694005924032	3.0129562317029377	0.0025871622792363433	0.01736714799659076	2
TMEM199	-0.351666	-3.01154	0.0025992862411557517	0.017430901152304414	2
TRMT112	-0.371105	-3.01148	0.002599799361273179	0.017430901152304414	2
MOK	0.559230425308882	3.0101388118034875	0.0026112831842929375	0.017497330835971325	2
APLP2	-0.262732	-3.00918	0.002619537187180473	0.017542051501365976	2
CAPS2	0.4689907915558713	3.008966158588506	0.0026213831314714484	0.017543831771384865	2
SEMA3A	0.7974277891952827	3.007563369050875	0.002633512127146899	0.017614388643200012	2
NBN	-0.320836	-3.00673	0.0026407604425752497	0.017652235517105958	2
GTF3C3	-0.249056	-3.00637	0.0026438608056215175	0.017662326428890318	2
CDKL3	0.3658524739828057	3.005926725661726	0.002647727932012234	0.01767752449136009	2
LAMC1	-0.453729	-3.00525	0.0026536175094750624	0.017706199043089916	2
PDP1	0.42429518699603175	3.0046283969507064	0.002659055005121947	0.017731824457578964	2
NAB2	0.5358977692219745	3.0042769960178597	0.002662128356180641	0.017741663348543612	2
FAM192A	-0.236248	-3.00321	0.0026714769299702543	0.017783790689585213	2
NETO2	-0.545065	-3.00319	0.0026716529649849713	0.017783790689585213	2
FRK	0.9366420048027794	3.001955249220165	0.002682516067577055	0.017845401976218117	2
PROSER1	-0.294126	-3.00167	0.002685022916810407	0.0178494576848966	2
TOMM34	0.4312134249521277	3.001521467755601	0.0026863409701398016	0.0178494576848966	2
CYTH3	0.4727198962958492	3.001075211312543	0.002690281072188151	0.01786494661752694	2
NLRX1	0.4671239575238031	2.9976206383331876	0.0027209614340132408	0.018057880933561872	2
POT1-AS1	0.606659079544961	2.9962972717060743	0.0027327988100275214	0.01812099425598812	2
ZNF423	0.6263445420383333	2.996192776384096	0.0027337355110132492	0.01812099425598812	2
ENPP2	1.0454802611123606	2.9950961226668618	0.002743583674206692	0.01817402389601847	2
GEM	1.014110786632054	2.9949028170596272	0.0027453229523052573	0.01817402389601847	2
TTC3	0.3507405106760939	2.9947558311427818	0.0027466461404592442	0.01817402389601847	2
CBFA2T2	0.2576443452733869	2.9944218093272914	0.002749655218971974	0.018174868752207807	2
PTPN11	-0.249	-2.99438	0.002750047690147628	0.018174868752207807	2
FAM47E	0.7878586080867006	2.9926790748323273	0.00276540376802873	0.018257034606626168	2
ZMYM5	-0.249903	-2.99264	0.0027657689100554095	0.018257034606626168	2
PLXNB1	0.9657898004757589	2.991803679503022	0.00277334549108195	0.018296170521380207	2
SPPL3	0.2843094265935139	2.9913425239865408	0.0027775375384153055	0.018312944945976923	2
PDE10A	1.1836757007780268	2.9896337713192387	0.0027931211353431425	0.01840476199745692	2
ZNF480	-0.332057	-2.98894	0.0027994520997911398	0.018435537760368343	2
TTC32	-0.401451	-2.98873	0.0028013895943918648	0.018437361390950133	2
RAD21	-0.272129	-2.98794	0.0028086514336072826	0.01847420430529719	2
ICA1L	0.4506239178467108	2.9873588936108706	0.0028139916372149016	0.018493553718556245	2
RAB8A	-0.363617	-2.98726	0.0028149244154156584	0.018493553718556245	2
IQCA1	1.0793624606604615	2.985890493662596	0.002827538763532758	0.01856117746216527	2
ANKS6	0.6333742529170375	2.985779957289636	0.0028285609534345344	0.01856117746216527	2
PHYH	-0.477966	-2.98544	0.0028316989180122497	0.01857079331759599	2
RPS28	-0.367425	-2.9845	0.002840427201265627	0.01860544416575694	2
LYN	-0.399548	-2.98436	0.002841734994894364	0.01860544416575694	2
TCF12	0.33389394365499264	2.9843290430969884	0.0028420096645162367	0.01860544416575694	2
FGFR1OP	0.2505056420052402	2.9831552631653095	0.002852932275184546	0.01866594404913024	2
DNASE1	0.572518319940089	2.9823830803129896	0.002860138709305803	0.018702073079754022	2
ZNF608	0.9275183182439531	2.9820242077622003	0.00286349355815224	0.018712989391503426	2
NCAPH	0.8850921069916835	2.98175955674919	0.002865969896750723	0.018718155155072518	2
TSC22D4	-0.351115	-2.98143	0.0028690852715025712	0.018727486049084686	2
MAF	0.4905726981947257	2.981194929303385	0.0028712596500130964	0.018730667387835142	2
SLC9A8	-0.358572	-2.98086	0.0028743970069628165	0.01874012329319328	2
LRRC8A	0.4799521525078203	2.979962810701009	0.0028828338022164296	0.018784098419019377	2
NFATC1	0.43960649390623957	2.979288977661438	0.0028891815871723964	0.018814418277052852	2
LRIG3	0.9857841726623027	2.9788876851637154	0.002892967986943581	0.018828032566843247	2
CHD2	-0.303592	-2.97838	0.0028977821364513548	0.01884831579438746	2
GDPD3	0.9235078416225768	2.977783738182234	0.0029034076722920152	0.018873849757294055	2
RNPC3	-0.283649	-2.97698	0.0029109892376779924	0.018912061735482006	2
MYO1F	-0.499812	-2.9759	0.0029213163558193143	0.01896805584717067	2
CEP95	-0.263508	-2.97498	0.0029300818715622037	0.01901385097601119	2
TRUB1	0.3834687605116347	2.9710403508976513	0.002967927827070076	0.019241912019311178	2
ALKBH6	-0.384133	-2.97083	0.0029699154424296546	0.019241912019311178	2
CERS4	0.7072322271575465	2.9706283841492414	0.002971911574419557	0.019241912019311178	2
CENPP	0.438476485470984	2.9704724912887075	0.002973420341302839	0.019241912019311178	2
KLHL29	-0.812787	-2.9704	0.002974151810663888	0.019241912019311178	2
CHID1	0.39713521617171144	2.9702448387291627	0.002975624870499621	0.019241912019311178	2
KPNA1	-0.23	-2.96923	0.0029855163159168852	0.019294637750654934	2
DEAF1	0.48559318206557534	2.967624266888936	0.003001109424076972	0.01938412910734533	2
RAB11FIP3	0.3636832225779274	2.9671876924630993	0.003005374322873827	0.019400390178411688	2
PLAG1	-0.617631	-2.96697	0.0030074951041836103	0.01940279961751925	2
CACNA2D1	0.8399322730973954	2.9667374019703545	0.003009779005679091	0.019406258013969193	2
IQGAP3	1.034087449248402	2.965431575385426	0.003022585752430839	0.01947752153757377	2
SKAP1	-0.728846	-2.96426	0.0030340766886633886	0.019540228233311835	2
HLA-DQB2	-1.03241	-2.96325	0.0030440920776483985	0.01959336483369865	2
HDAC8	-0.287748	-2.96278	0.003048723206174225	0.01961180403137452	2
CHD7	-0.358335	-2.96217	0.0030547529026076644	0.019639213362856338	2
SDE2	-0.35662	-2.9603	0.0030734005702135795	0.019743113878904615	2
NDUFS8	-0.383729	-2.96019	0.0030744703140255856	0.019743113878904615	2
ZPR1	-0.388156	-2.95958	0.0030806315372020826	0.019771243906100997	2
RNF7	-0.361712	-2.95907	0.003085697795566447	0.019792318095998993	2
USP47	-0.2551	-2.95849	0.003091536650170979	0.01981832068524733	2
AGPAT2	-0.466131	-2.9581	0.0030953728177152335	0.019824761446119603	2
PDE9A	0.6442336057773825	2.958030743479956	0.003096112433357776	0.019824761446119603	2
CAPS	0.7508428557582261	2.9576055723991863	0.003100385604504478	0.019836565466488987	2
NAF1	-0.483619	-2.95749	0.0031015291047306924	0.019836565466488987	2
NDUFAF4	-0.337121	-2.95637	0.0031128040859405774	0.01987122593539646	2
LYST	-0.444212	-2.95628	0.0031137759123571166	0.01987122593539646	2
POMZP3	-0.484316	-2.95615	0.0031150211369421602	0.01987122593539646	2
ZMAT1	0.3984148708187399	2.9561319173759615	0.0031152381901089626	0.01987122593539646	2
RANBP17	0.6762273421019855	2.9560159973602507	0.0031164092655002534	0.01987122593539646	2
TRIB1	0.48980544207536447	2.9558895932357507	0.0031176867134522774	0.01987122593539646	2
SSB	-0.306945	-2.95381	0.003138779621850777	0.019993796671399142	2
ZKSCAN7	0.6568712983970628	2.9536382640311283	0.00314051890434298	0.019993796671399142	2
TBC1D32	0.4184080527080379	2.953405151652959	0.0031428917360915515	0.019997436645171632	2
IFNAR1	-0.296574	-2.95287	0.0031483744716680473	0.020020848659181172	2
RASSF6	1.3727002619981707	2.9509045430782255	0.00316844821717441	0.020136966545671136	2
TP53INP1	0.5121346289455506	2.9503879485239377	0.0031737514173140378	0.02015913157118865	2
TCEAL4	-0.306639	-2.94833	0.003194996221910992	0.02028247172777458	2
DIS3	-0.256058	-2.94633	0.003215716527436006	0.020402343202355414	2
NT5C3B	-0.435718	-2.9461	0.003218060235190563	0.02040555270777888	2
ZBTB49	-0.378382	-2.94559	0.0032233927565106877	0.02041497293144103	2
SS18L2	-0.328736	-2.94556	0.0032236972330100164	0.02041497293144103	2
ENTPD4	-0.207848	-2.94541	0.003225226347326567	0.02041497293144103	2
PRELID3A	0.48589624136221804	2.9452535935145447	0.003226900611967847	0.02041497293144103	2
ALOX5AP	-0.755682	-2.9447	0.0032327000881807607	0.020425467821273732	2
SP140L	-0.32318	-2.94462	0.003233475202075893	0.020425467821273732	2
SIKE1	-0.376059	-2.94457	0.0032340783959109447	0.020425467821273732	2
SMARCE1	-0.210809	-2.94418	0.003238158818804114	0.020439611918807322	2
FAU	-0.331684	-2.94343	0.0032459821655681626	0.020459416646876557	2
FAM89A	-0.825939	-2.9434	0.0032462516698202534	0.020459416646876557	2
GUF1	-0.254602	-2.94335	0.0032468244737275057	0.020459416646876557	2
PPP1R16A	0.565845326393594	2.9430968652451877	0.003249467278948183	0.02046124329978043	2
H2AFY	-0.327796	-2.94297	0.003250800070324478	0.02046124329978043	2
PTPN6	-0.510305	-2.94253	0.003255409618941245	0.020478647591560706	2
ENC1	0.6579613033859454	2.9412678441369398	0.00326871759347464	0.02055071995489747	2
LEPROTL1	-0.408657	-2.9397	0.0032852581629836007	0.02064302285433329	2
LINC00115	-0.622094	-2.93945	0.0032879235185391746	0.020648085309016097	2
ARL10	0.5237623833666613	2.9380068792889746	0.0033032969378400502	0.02073290327916228	2
COG3	-0.222829	-2.9372	0.00331186787184366	0.020774954226598957	2
RRAD	1.0710208161535515	2.9362345308612867	0.003322230409990691	0.02082818986003763	2
FGFR1OP2	-0.311443	-2.93539	0.0033312652946227064	0.020873046594918686	2
ARID4A	-0.254367	-2.93484	0.003337172288246869	0.020898265040273537	2
LCAT	0.7064023301985395	2.93451574428838	0.003340686046500309	0.02090847642293852	2
COMMD5	-0.398619	-2.93293	0.0033577834433572797	0.02099796606131856	2
PTK6	0.6571125895354081	2.932840236606108	0.0033587667950015095	0.02099796606131856	2
ZNF544	0.3200160392168094	2.932423959008936	0.0033632727305133903	0.021014303391609552	2
ZNF710	0.39769405796871277	2.932141383759573	0.0033663345603550956	0.0210216044002377	2
ADNP2	-0.303042	-2.93169	0.003371178764531579	0.021029103140755106	2
AIP	-0.393486	-2.93168	0.0033713233892231007	0.021029103140755106	2
SLC44A4	1.1395030648956703	2.931088985971273	0.0033777601054840564	0.021051702467231554	2
NIT2	-0.28438	-2.931	0.0033787385208147915	0.021051702467231554	2
CENPC	-0.346666	-2.92992	0.0033905170652892254	0.021113242274765152	2
RAPH1	0.46920705208342023	2.925358884233325	0.0034405918145633788	0.02141305544680336	2
TOX3	1.3936754396282995	2.9247364525319193	0.003447480572124875	0.02144390856711624	2
PRPF18	-0.232296	-2.92291	0.0034677367670606484	0.021555250221359703	2
PSMC4	-0.423332	-2.92278	0.00346926345542374	0.021555250221359703	2
ACAT1	-0.338555	-2.92252	0.003472150456943259	0.021561122216689602	2
NUDT2	0.3711684128300905	2.921769081798847	0.0034804948328050612	0.021593764560822376	2
NAIP	-0.474994	-2.9217	0.003481296817425205	0.021593764560822376	2
CFAP97	0.32777594048185044	2.921240338566051	0.00348640761677322	0.021612751878909115	2
RAI1	0.30517469119178164	2.9210756590796585	0.003488251046294257	0.021612751878909115	2
PPP1R14C	0.8212352468604693	2.920732438126067	0.0034920959281397284	0.021624507021826774	2
G6PD	-0.605649	-2.91942	0.00350686890152521	0.021703882616295658	2
CLCN4	-0.734427	-2.91827	0.0035197769619840667	0.02177163432251203	2
SULT1A1	-0.458802	-2.91674	0.0035370538670057017	0.021866319089846497	2
NCF1	-0.69631	-2.91589	0.0035467652491535774	0.02190750773785295	2
NDUFAF6	0.2650747999106465	2.9158101793693527	0.0035476626959073765	0.02190750773785295	2
UBE2D1	-0.417152	-2.91548	0.0035514373913300037	0.021918626656996683	2
TRIM13	-0.279818	-2.91374	0.003571310424037847	0.02202903313227345	2
NPRL2	-0.304712	-2.91283	0.0035816873981667197	0.022078350596163865	2
ZMAT2	-0.331174	-2.91269	0.003583282696053975	0.022078350596163865	2
KATNAL1	0.35745942113410945	2.9119288382882194	0.0035920445903898277	0.022111034475243718	2
IGSF8	0.3977675244584804	2.911883139730963	0.003592570133598097	0.022111034475243718	2
ZNF736	-0.368736	-2.91118	0.0036006186099900943	0.022148292757185606	2
GNG5	-0.389865	-2.91075	0.0036055759376208544	0.02216650588892821	2
WLS	0.48430184010337307	2.9093478159020822	0.0036218367082993083	0.02225415217058507	2
TSC22D1	0.43844807954600357	2.9079609414419756	0.0036379377182898594	0.022330089583226322	2
HERC3	-0.262398	-2.90794	0.0036382177840274172	0.022330089583226322	2
GMEB1	-0.286773	-2.90698	0.003649374503815218	0.02238619067174606	2
ZNF827	0.7268744575208053	2.9051965053283157	0.0036702259570021707	0.022497184007977972	2
PLPP1	0.5352789541371826	2.90508609082474	0.0036715209783352324	0.022497184007977972	2
C2orf42	0.4127708383437013	2.903952389911259	0.0036848418984649065	0.022562277341628727	2
HERC5	-0.532372	-2.90384	0.0036862083308758452	0.022562277341628727	2
DOCK3	0.6497987480286033	2.9035843836645254	0.003689175388283317	0.022567996879399265	2
PLSCR1	-0.41999	-2.90297	0.0036963898739433817	0.022599678838322337	2
MPST	-0.324421	-2.90247	0.003702297096854971	0.022623337736037835	2
APBA1	0.5060988279996496	2.9019777481278424	0.0037081487888947755	0.022646631464850766	2
DTX2	0.4261695424109109	2.901153304440354	0.0037179193749212604	0.022693820131803606	2
RASA4	0.6390644007159553	2.900568699653685	0.003724861774788435	0.022704688300345804	2
RAE1	-0.293464	-2.90054	0.0037252047195551283	0.022704688300345804	2
ARHGEF17	0.7281422389966958	2.9004868553029706	0.0037258346467828564	0.022704688300345804	2
SLC7A6OS	-0.245123	-2.89932	0.0037397301472755257	0.0227768644131652	2
IL33	0.8862956271198791	2.898180918729895	0.0037533400918993137	0.022835845794369758	2
SKP1	-0.326911	-2.89817	0.0037535277469805286	0.022835845794369758	2
KIF14	0.8960310780809758	2.897952045110207	0.0037560801632728845	0.022838859831773733	2
SEC22B	-0.384107	-2.8964	0.003774750629461289	0.022934001552188242	2
WDR26	-0.299409	-2.8963	0.003775858311933721	0.022934001552188242	2
UXT	-0.245832	-2.89513	0.003790040165927612	0.02300755383394985	2
MRPS35	-0.343737	-2.89433	0.0037996472913077294	0.023044570367476785	2
ZC3HAV1	0.3266359613397438	2.89428017895608	0.0038002889617986123	0.023044570367476785	2
STRBP	0.5514197460294392	2.89329527180719	0.0038122272725191002	0.023104344654355662	2
ABL1	0.2695503423358983	2.8929983018880563	0.003815833601530506	0.023111701302189588	2
PTCH1	0.7066921292604081	2.8928525863718066	0.0038176042680550934	0.023111701302189588	2
IL1RL1	-1.16275	-2.89233	0.0038239363172726526	0.0231374195807511	2
OARD1	-0.268223	-2.89114	0.0038385074004203116	0.023212934459077732	2
SLC25A37	-0.394967	-2.89024	0.003849418842108137	0.02326624790632915	2
KIAA1211L	0.6954735205268504	2.88865030375847	0.0038689907549820045	0.023371819560699236	2
LSM14A	-0.182329	-2.88817	0.0038749429823017813	0.0233950472716132	2
MMP2	0.7865801863881788	2.8879885047884106	0.003877140414341599	0.023395592402410202	2
HNRNPH2	-0.424265	-2.8876	0.0038818883537859346	0.023396253139706173	2
AK3	0.3067661983017751	2.8874881958593277	0.003883311767335276	0.023396253139706173	2
DGKH	0.44089854484882507	2.8873892292574923	0.003884533585354204	0.023396253139706173	2
TAP1	0.5555901430182388	2.8872964999151898	0.0038856787165287027	0.023396253139706173	2
APLF	0.4975760056182396	2.8858525710575904	0.0039035496588627106	0.023491117540570556	2
PACRGL	0.30374204361798596	2.885506785858848	0.0039078403715637295	0.023504199157893875	2
CHMP1B	-0.543853	-2.88454	0.003919818292077769	0.023556282662852174	2
TMTC2	0.48794504195771704	2.884424796217186	0.003921294043603188	0.023556282662852174	2
HAUS2	-0.432771	-2.8843	0.003922864689148309	0.023556282662852174	2
TCEA1	-0.256956	-2.88384	0.003928590620257828	0.023577914409039277	2
MRPL20	-0.276683	-2.88354	0.003932329100853293	0.023587601300256136	2
CNNM3	0.5177626521202268	2.883036861005832	0.003938613490199394	0.02361254081084442	2
FCN1	-1.14671	-2.88279	0.003941712289297171	0.02361836564925337	2
PISD	-0.228882	-2.88239	0.003946723044883346	0.02363534913613934	2
L3MBTL4	0.47927911032694337	2.882222794869334	0.003948804165319146	0.02363534913613934	2
GAS7	0.40210251077481396	2.8806937573658318	0.0039680097709047435	0.023731174740557935	2
PDE4DIP	-0.468792	-2.88061	0.003969088669117904	0.023731174740557935	2
ADRM1	-0.408047	-2.88009	0.003975644593306972	0.023757579073997476	2
CHUK	-0.263764	-2.87983	0.003978861102653226	0.02376401012520644	2
INTS6	0.3783191342940295	2.8783326528668085	0.0039978332803025105	0.023864485436128374	2
MLLT6	0.35338071743499533	2.876704289229238	0.004018519837163286	0.023975081005923677	2
TMEM182	0.502979610934427	2.8729517881574016	0.004066561693251003	0.024248675875491885	2
GNB4	0.32166259662858654	2.8722048213770055	0.004076186814437424	0.024293023188780846	2
ANXA2	0.3860998682750283	2.8714707517012115	0.00408566588836225	0.024336452982020418	2
TXN	-0.478592	-2.87113	0.004090103699820983	0.02434982379577071	2
TMBIM4	-0.286009	-2.87022	0.004101828377774319	0.024406538305695745	2
ILF2	-0.396721	-2.86874	0.004121120384192874	0.024508194764699242	2
CTNS	-0.36516	-2.86818	0.004128434832736885	0.024538550293296376	2
FRMD6	1.0542095707493515	2.8673806547506886	0.004138848724181332	0.024587285920056354	2
ITGB2-AS1	0.6406796750217192	2.8670684748854556	0.004142933634756151	0.024598391522298153	2
GMDS	0.3330880801192339	2.866316431012057	0.004152789243138671	0.02464373007299234	2
TBPL1	-0.298359	-2.86482	0.0041724974686943505	0.024740930091682243	2
METTL23	-0.253707	-2.86467	0.004174424083408707	0.024740930091682243	2
C6orf47	-0.426572	-2.86456	0.004175853642422096	0.024740930091682243	2
ASAP3	0.7506924731717024	2.863401130846736	0.004191195921052742	0.024818585766105915	2
WWC2	-0.35006	-2.86288	0.004198073266320602	0.02484605942215226	2
PLTP	0.9121662481087448	2.8626544261394447	0.0042010848375721695	0.024850636628430366	2
ALDH4A1	0.5617273454722849	2.8616185157007985	0.004214838874141887	0.02491871992523822	2
PGP	-0.551833	-2.86089	0.004224493038789195	0.024962504635272182	2
DCUN1D3	-0.331206	-2.85962	0.004241531789965983	0.025049855034038462	2
KCP	1.11926021112609	2.8586964219068056	0.004253856618253046	0.02509083955430623	2
CRAMP1	0.30558821215557985	2.858603936092598	0.004255096881309976	0.02509083955430623	2
FOXN2	-0.406905	-2.85859	0.004255250912434354	0.02509083955430623	2
SGSM2	0.42719221900396204	2.8567764800911037	0.00427967098265199	0.02522143679425958	2
ST8SIA1	0.9582662533379205	2.8557402388663453	0.004293662598716899	0.02529046993822479	2
DCAKD	0.3432599686885111	2.855554992425449	0.004296168213324477	0.025291811067095264	2
FHOD3	1.192102041616549	2.855190857612545	0.004301097309208632	0.02530741039965206	2
NRSN2-AS1	0.4796040367704785	2.8549089774231473	0.004304916489345166	0.02531490156077478	2
ANAPC11	-0.354522	-2.85476	0.004306930473593044	0.02531490156077478	2
LFNG	-0.506624	-2.85352	0.004323837222221807	0.025400827872131593	2
KLF3	-0.319361	-2.85254	0.004337123826400202	0.02546540763856237	2
EML4	-0.461834	-2.85234	0.004339900063317594	0.025468240170726873	2
NUP107	-0.292431	-2.85194	0.004345390543286535	0.025486989541526887	2
STAC	-1.19464	-2.85137	0.004353063351318996	0.025518512349363684	2
PAAF1	0.39611817161146323	2.850964616154472	0.004358681957391557	0.02553796610708098	2
DNM2	-0.289265	-2.84988	0.004373578053740618	0.025611728444452576	2
RPL13	-0.357621	-2.84956	0.004377958252315184	0.025623864246418285	2
COPE	-0.364324	-2.8492	0.004382888553781357	0.025639205275360597	2
CHML	-0.565984	-2.84878	0.004388686211433515	0.02564739269610605	2
USP32	-0.296497	-2.84877	0.004388908053913491	0.02564739269610605	2
EFNA5	1.0118104232936613	2.8479720738541188	0.004399878525398956	0.02568355094226296	2
CMKLR1	0.7952781234828057	2.8479670096491763	0.004399948539441205	0.02568355094226296	2
TRAPPC6A	-0.429583	-2.84782	0.0044020352556179785	0.02568355094226296	2
AP5Z1	-0.330283	-2.8476	0.004404991137526307	0.02568729863442993	2
RNF149	-0.417329	-2.84627	0.0044235171802241525	0.025781790683479668	2
THEM4	0.2593217818916263	2.8452690598918435	0.004437392337792343	0.025849090832375857	2
CEP70	0.5255631968376735	2.845089497189956	0.0044398946384066615	0.02585010496603522	2
G3BP1	-0.187528	-2.84485	0.004443280734965108	0.02585626100645576	2
COMMD9	-0.444564	-2.84468	0.004445668610713787	0.025856604811291345	2
LIN7C	-0.291246	-2.8435	0.004462152793904543	0.025938891345927823	2
RTN4R	0.7524131974632681	2.842976019359626	0.004469443314245284	0.02596767614760094	2
ACOX1	-0.296037	-2.84233	0.004478486197693335	0.02599073262169378	2
NR2F2	0.807434391725469	2.8422774501825745	0.0044792491689396065	0.02599073262169378	2
BTF3	-0.271089	-2.84219	0.00448043431846545	0.02599073262169378	2
SLTM	-0.223883	-2.84162	0.004488485418851035	0.02602384000287365	2
MRPL9	-0.281696	-2.84134	0.004492497818245771	0.026033509016692484	2
ZNF800	-0.259891	-2.83891	0.004526849008443506	0.026218886041078898	2
SLC25A51	-0.347457	-2.83856	0.004531760036967673	0.026233645302634032	2
CCNDBP1	-0.262218	-2.83726	0.0045502233993346825	0.026326800626791547	2
SLC39A13	0.438804126934483	2.8366652394394083	0.004558738208884444	0.026362328298564577	2
DHX29	-0.221943	-2.83326	0.004607563518737412	0.026630805699396923	2
COPG2	0.30424467695109925	2.8329677444260337	0.00461180393337145	0.026638237341302277	2
KLHL7	-0.371018	-2.83284	0.004613702794910362	0.026638237341302277	2
TSSC4	-0.319721	-2.83267	0.0046160468922512455	0.026638237341302277	2
HSPBAP1	-0.319361	-2.83144	0.0046338448599332616	0.026725352976547528	2
NCBP1	-0.257288	-2.8313	0.004635956933516215	0.026725352976547528	2
FCGBP	1.646012431839897	2.8286699990407427	0.0046741868919212975	0.026924121122717786	2
AMIGO2	-0.785102	-2.82859	0.004675286456327109	0.026924121122717786	2
SFXN2	0.5328706475150671	2.8281830511085317	0.004681303047370785	0.026944794056484096	2
PHACTR4	0.2443092882021307	2.827120950278104	0.004696858406205513	0.02702032066533669	2
ZNF620	0.45238352489024014	2.8261061157396576	0.004711765210558311	0.027086038702515493	2
AQP4-AS1	0.998575847002511	2.826011240039501	0.004713161017135903	0.027086038702515493	2
SAP30BP	-0.273789	-2.82567	0.004718227647469817	0.027101128592787054	2
CCNG1	-0.344002	-2.82542	0.004721897045940716	0.027108181437993675	2
PAQR5	-0.689027	-2.8251	0.004726596626489964	0.027121138162231558	2
RDH13	0.43602331728331006	2.8218922647341436	0.004774121237549538	0.027367687065610092	2
ZFP3	0.621565125738271	2.8218351221836224	0.004774971934203938	0.027367687065610092	2
IFT43	0.24646504236405425	2.8217016733060163	0.0047769591581691756	0.027367687065610092	2
RPL35	-0.307683	-2.82136	0.004782053676061399	0.02738274469587917	2
ERAP1	-0.302525	-2.82025	0.0047986346052031285	0.027452239709707758	2
POLI	0.32499567809842805	2.8202158802046333	0.004799135123529024	0.027452239709707758	2
SEC61B	-0.316614	-2.81957	0.004808845030263055	0.027493618110716118	2
FAM91A1	-0.273098	-2.81797	0.0048328427130126354	0.027616599404312554	2
CDH13	-0.986285	-2.81763	0.004837877395640674	0.0276251588312519	2
ANKFN1	0.8956586079882796	2.817539461448886	0.004839316754641534	0.0276251588312519	2
AZI2	-0.538738	-2.81644	0.004855984235888141	0.027692475604135597	2
ITGA3	0.6126934454870031	2.8164276805415764	0.004856097451252095	0.027692475604135597	2
CNPY3	-0.380342	-2.81625	0.004858758450018794	0.027693426627596853	2
PPM1H	0.5802414068428772	2.815251348995066	0.004873909746737078	0.02776553099949809	2
PPIG	-0.207793	-2.81462	0.00488356441615068	0.027806264467959488	2
MORC2-AS1	0.5741814663314702	2.8141269380303022	0.004890991077782158	0.027821400545466817	2
IKBKG	-0.408939	-2.81401	0.004892729342733644	0.027821400545466817	2
CD109	0.608436680869363	2.813946316687451	0.004893740004079681	0.027821400545466817	2
TRHDE	-0.968428	-2.81343	0.004901637562557433	0.027848414082642957	2
BEX4	-0.440625	-2.81318	0.00490546701454754	0.027848414082642957	2
PSMD6	-0.321402	-2.81314	0.0049060162069395315	0.027848414082642957	2
ASXL1	-0.19274	-2.81296	0.004908748986891531	0.027849688299160284	2
ZNF277	-0.307352	-2.81188	0.004925229929259691	0.027928921299576272	2
XRN2	-0.279876	-2.81147	0.004931540098247109	0.02795042864259196	2
PALD1	0.6359986220844045	2.8108589814858993	0.004940943627863044	0.027989437296001726	2
SLC15A2	0.5592448810966264	2.8105375259624426	0.004945882097700438	0.027991396840633467	2
ABCC4	0.47123627168643434	2.810508276355563	0.0049463316762427155	0.027991396840633467	2
PLAUR	-0.647569	-2.81017	0.0049514880839643715	0.028006302698041986	2
KATNA1	-0.228919	-2.80918	0.0049668512385884715	0.028073911071543434	2
CIAO1	-0.250274	-2.80907	0.004968498176671427	0.028073911071543434	2
ATP6V1F	-0.450473	-2.80782	0.004987739406444826	0.028165884189932926	2
TPK1	-0.448106	-2.80764	0.004990658435737369	0.028165884189932926	2
IGKC	1.1387886768110886	2.8075246524208968	0.004992385849390975	0.028165884189932926	2
TAOK2	0.37260816612394004	2.8071510690930155	0.0049981795824998575	0.028169951726080063	2
PKNOX1	-0.27991	-2.807	0.00500050723048496	0.028169951726080063	2
[truncated: 9,133 more rows]

## Sheet: DEmeta_Tissue_stem_cells
Table S2: The differential genes of Tissue cell in the training set
[truncated: 58 more rows]
