# Supplementary material
Source: Research Square preprint supplement (doi:10.21203/rs.3.rs-9392286/v1)
Supplement: Supplementary file 15 [file a9a423e7bd7790875c0e5bf8.xlsx]

## Sheet: Table S6(ExposureA)
Table S6: Exposure A（The intersection of the target genes in the three databases of NNK and the core genes of WGCNA）
Gene	Endothelial__MM	Epithelial__MM	Macrophage__MM	SmoothMuscle__MM	Tcell__MM	Endothelial__GS	Epithelial__GS	Macrophage__GS	SmoothMuscle__GS	Tcell__GS	Endothelial__Module	Epithelial__Module	Macrophage__Module	SmoothMuscle__Module	Tcell__Module	Gene_std
MT-CO1	-0.942587	-0.911129	0.948936343320407	-0.0834433	0.822524964067824	0.00491237274712798	0.0285599889058121	-0.0551232	0.190753495246259	-0.0769587	green	green	green	brown	turquoise	MT-CO1
SAT1	0.981876021592568	-0.867758	0.765976739222906	0.969923904723484	-0.102066	0.116044220738173	0.1281427043522	-0.28659	0.0462360236172266	-0.300743	green	green	purple	brown	blue	SAT1
MT-ND4	-0.907841	-0.910548	0.947999145134041	-0.633026	0.363568661504846	0.00703124411477375	0.012357456164503	-0.0746416	0.0913433128235813	0.182645874789871	green	green	green	brown	turquoise	MT-ND4
SPP1	0.747935088455288	0.659364037883779	0.860026334194656			0.211921246114001	0.196643723916924	0.265067697064438			purple	black	greenyellow			SPP1
MMP7	-0.747713	0.80084797192649	0.75652640345724			0.351851387214368	0.35706495306656	0.285825290390355			green	black	purple			MMP7
PRKG1	0.960265451616169	0.927283650437187	0.920402445252594	0.985702718332312		0.0775825698385253	-0.0812348	0.0823791872875795	0.0722248725817824		green	green	brown	brown		PRKG1
KDM5D	0.0327873519815817	0.0634133339528762	0.385506713467981	-0.131198		0.206225047838032	0.149841375767389	0.0939062078118346	0.10787444701328		green	green	blue	brown		KDM5D
TUBA1B	0.967316903212464	-0.943935	0.982158374178962			-0.125168	-0.100636	-0.132282			purple	green	green			TUBA1B
UBA52	0.986173914792735	0.98021111514306	0.980388490808347	-0.244731		-0.138735	-0.152961	-0.182503	-0.210217		purple	black	purple	brown		UBA52
ALDOA	0.984008502360985	0.990185098030681	0.982986477327055			-0.198913	-0.163257	-0.223463			purple	black	purple			ALDOA
MAGI1	0.974646889831973	0.981892890934446	0.951204836199359	0.955966602765601		0.191482676960669	0.0684511249219107	0.180332953535888	0.0888839843495066		magenta	brown	brown	brown		MAGI1
PLA2G2A	0.825515203378576		0.926605820338713			-0.143739		-0.0441931			purple		green			PLA2G2A
LRRFIP1	0.985184874235645			0.942379162443382	0.976748610039287	0.127041213225521			0.064805978596744	0.0447101503395218	green			brown	blue	LRRFIP1
CCL2	0.866617566300509	0.894176392657103	0.888381035740557	0.323883371613301		-0.000813422	-0.0856058	0.0577505599372021	0.194890830919621		purple	black	green	blue		CCL2
RPS27	0.981892825178683	0.984397999782287	0.984984675121706	0.598075910536837	0.814586246411734	-0.19042	-0.192094	-0.200846	-0.240031	-0.431439	purple	black	green	brown	turquoise	RPS27
FOLR1	0.908540042716562	-0.962718	0.938666477213718			-0.235975	-0.120436	-0.106582			purple	green	green			FOLR1
MECOM	0.968021120247522	0.916938643396605	0.959002655531644	0.896190987215684		0.196046326697159	0.145224983799816	0.206431313918265	0.240064917183604		blue	green	brown	brown		MECOM
CXCL10	0.751932938726548		0.773213999471879			0.133935153110963		0.225265910203729			purple		green			CXCL10
PRDX1	0.97724259111759	0.959172741365564	0.975810386655309			-0.16477	-0.184993	-0.11891			purple	black	purple			PRDX1
PLCB1	0.945886587089883	0.911617595730321	0.889091540073151	0.928053178860049	0.86460350130431	0.290726976103372	0.299195517292043	0.156215542642038	0.0814558022474733	-0.158014	green	blue	brown	brown	blue	PLCB1
LTB	0.91812364701847		0.912557827543697			-0.0421297		-0.0421139			purple		purple			LTB
CXCL8	0.789774993087783	-0.918734	0.907177276014039			-0.172778	-0.0188004	-0.254485			purple	green	green			CXCL8
PTP4A1	-0.891927	-0.885896	0.948823353588558			0.0501202203281831	0.078765723335242	-0.0521223			green	green	green			PTP4A1
ROS1	0.916556816541633	0.836642077419261	-0.858461			-0.0644413	-0.0677888	0.0388735993650291			green	green	green			ROS1
PDE4D	0.960431030997971	0.946577500327104	0.908118731678318	0.959985376629825	0.961776714799219	0.0867448387422472	0.110784679465816	0.0944125999362365	0.215580433180789	0.0831985133862001	blue	green	brown	brown	blue	PDE4D
GAPDH	0.979122318958959	0.976394281321499	0.982014566022045	0.611931636787573		-0.126605	-0.12271	-0.186561	-0.353183		purple	black	purple	blue		GAPDH
MAGI3	0.942422693738411	0.901970755152261	0.968729231295446	0.976592555295066		0.0858020337881803	0.0899137849715451	0.234353680804595	0.15439987750518		green	green	brown	brown		MAGI3
DUSP1	0.955343202842585	0.879571668838029	0.906616504831583	0.878953300606391		0.0439319123802671	-0.213744	-0.247213	0.0113610835021968		green	black	purple	brown		DUSP1
PSENEN	0.977733096615842	-0.960591	0.984966296245346			-0.0512678	-0.00258294	-0.113493			purple	green	purple			PSENEN
RTN4	0.97439022021664			0.963327146093143	0.926974077200941	0.0771510945137116			0.0660683392571486	-0.0128321	green			brown	blue	RTN4
EEF1A1	-0.970178	-0.976241	0.982377666857812	0.561676656865049	0.879289049995666	-0.123731	-0.150782	-0.145622	0.00674259659675906	-0.402958	green	green	green	blue	turquoise	EEF1A1
BCL2A1	0.936321504029519	0.766646231119803	0.886742432949573			-0.237054	-0.147663	-0.125014			purple	black	green			BCL2A1
SDS	-0.778712		0.360772972192796			0.0476873106728287		0.42982561091196			green		purple			SDS
CLEC4E	0.846509481314492		0.781808443267855			-0.393152		-0.316877			purple		purple			CLEC4E
RAC2	0.951320674756397		0.925700441843007			-0.158077		-0.133116			purple		green			RAC2
MT-ND6	-0.866211	-0.839666	0.898984982238126			0.0800485421035814	0.0515979270152349	-0.0352733			green	green	green			MT-ND6
ANXA2	0.981242678282586	0.766200299838135	0.964842626250057	0.852725271482786		0.132129758808948	0.200512124194591	-0.027363	0.243027191108241		green	black	green	brown		ANXA2
NR3C2	0.976533872974733	0.944377540102301	-0.912038	0.911538546002181	0.753233360249871	0.107538593482716	0.115023152906464	0.163667069553395	0.138816668677191	0.0162436219490804	magenta	green	green	yellow	blue	NR3C2
PDE10A	0.931727004415935	0.857600608582818	0.79424337364295	0.614890214582503		0.277969082824668	0.441656041690745	0.32802463768097	0.367819046821293		green	blue	brown	brown		PDE10A
SOD1	0.977603859413261	0.966111134342064	0.970518089225403			-0.0849531	-0.00387343	-0.0973567			purple	black	purple			SOD1
HSPE1	-0.932018	-0.918005	0.944784033776007			-0.085401	0.00906690688731087	-0.069414			green	green	green			HSPE1
TACSTD2	0.832715407658227	-0.912616	0.909706272945001			-0.0683796	-0.0119802	-0.0129072			purple	green	green			TACSTD2
PRDX5	-0.965934	-0.978742	0.985355413252254			-0.168072	-0.100997	-0.159419			green	green	green			PRDX5
RPSA	0.981793908884754	0.983407581983859	0.978683449805118	0.6347569674515		-0.157374	-0.191493	-0.165477	-0.254789		purple	black	purple	blue		RPSA
GSTP1	0.975063928656818	0.981124195307854	0.981277684887503	0.254323467719093		-0.169194	-0.0955094	-0.162752	-0.120045		purple	black	purple	blue		GSTP1
CTNNB1	0.963469413163604	0.186778866658489		0.941480584504949	0.898962815420364	0.139740652493277	0.377563124626659		0.191819474084086	0.186979491022586	blue	green		brown	blue	CTNNB1
ERBB4	0.925913050776776	0.937791655926293	0.958327949748903	0.567719945527305		0.00331552638036636	0.0431761092000419	0.155227143443641	0.254961608129891		blue	green	brown	brown		ERBB4
DNPH1	0.968321134785602	-0.96223	0.958129629917933			-0.101145	-0.0471325	-0.0689014			purple	green	green			DNPH1
RAPGEF4	0.970070112804951	0.759139977469915	0.627601086112894	0.456180642375162		0.204182027991253	-0.0692782	-0.0200118	-0.0826375		green	green	brown	yellow		RAPGEF4
EEF1B2	0.980515805418992	-0.977899	0.983231696786351	0.461939918800586		-0.110574	-0.164992	-0.135946	-0.172299		purple	green	purple	blue		EEF1B2
PEBP1	0.96699628947955	-0.970541	0.970361064539406			-0.249504	-0.241851	-0.182237			purple	green	purple			PEBP1
CD44	0.953873297799935			0.819774486720201	0.981142278937211	0.0348143757842821			0.158371020906674	0.126340913827974	green			brown	blue	CD44
ROR1	0.923398504476486	0.868291385555137	0.950427497653397	0.95002533653298		-0.0866258	-0.127738	0.261766193903309	0.204887112452889		greenyellow	brown	brown	brown		ROR1
YBX1	0.971140341032388	0.97962244472072	0.976185458484012	0.365754937703582		-0.187951	-0.186268	-0.187815	-0.212899		purple	black	purple	brown		YBX1
PSMB6	0.978922710613055	0.966702326900099	0.986981056568255			-0.15544	-0.170796	-0.217409			purple	black	green			PSMB6
DOCK1	0.972615540953573	0.959701046180851	0.969585108534976	0.950922700871888		0.228517246996057	0.145082084032482	0.243032698842078	0.173644272725093		magenta	brown	blue	yellow		DOCK1
SMYD3	0.939411503954358	0.971887544056423	0.968064439033491	0.971810603797423	0.978327187031711	0.0554283049103116	0.0711948058393147	0.159016345930914	0.172675591371485	0.105814800253652	blue	brown	blue	brown	blue	SMYD3
MCL1	0.957390363564781	0.900984443508617	0.887872244366341	0.846925890305858	0.792508931059535	0.0892638508169684	-0.146238	-0.191387	0.023761534752847	0.104887808411237	green	black	purple	brown	blue	MCL1
THBS1	0.899422711678934	0.308615981069307	-0.0449352	0.905409395241691		-0.0370009	-0.177758	-0.603537	0.00369435363035022		green	black	purple	brown		THBS1
CDK14	0.965528744435787	0.963330504109869	-0.968706	0.952060236705319		0.150060202754818	0.22037289669267	0.178906931855305	0.17531138453864		blue	brown	green	yellow		CDK14
VKORC1	0.969876470191005	-0.952758	0.976428896241704			-0.0768088	-0.159165	-0.106269			purple	green	purple			VKORC1
RAN	0.984953942077188	0.956938487837165	0.984728421369912			-0.146829	-0.224184	-0.149756			purple	black	purple			RAN
HSPA8	0.954496001595483	0.944704207385254	0.958119866984412			-0.0354357	-0.0396508	-0.0702693			purple	black	green			HSPA8
TEAD1	0.966263597956923	0.945739400846047	0.938993387599639	0.947115335323754		0.188547009809928	0.120297944335797	0.205128166941555	0.159555816514855		magenta	brown	brown	brown		TEAD1
IGF1R	0.937404554613121	0.911144691844113	0.914490418776177	0.976353083424987		0.183549728511281	0.259329477542422	0.219980028343001	0.093430294798388		blue	blue	brown	brown		IGF1R
CACNA1C	0.933764467065529	0.822868681934913	0.93142641173258	0.944928308297692		0.199007571051231	0.152711377605999	0.265609352096082	0.138603297264151		green	green	brown	yellow		CACNA1C
L3MBTL4	0.957969635371579	0.939180446781836	0.966905755732516	0.837821067753434		0.0897254571429633	0.0415716974472597	0.217003462324942	-0.157855		magenta	green	blue	yellow		L3MBTL4
HSD17B10	0.973727032961091	-0.955612	0.964272299435738			-0.121629	-0.181198	-0.212124			purple	green	purple			HSD17B10
SELE	-0.1942		0.836040063854904			0.435115769320629		0.101165987425054			green		green			SELE
ARPC2	0.988958872231152	-0.901183	0.966595957262748	0.949980727699016	0.967585004795332	0.0836747985902902	-0.367715	-0.228554	0.172412952334933	0.0323361260843915	green	green	green	brown	blue	ARPC2
SLC2A3	0.899386087384233	0.386682964867574	0.354634021506086	0.684954	0.870390662737199	0.0212973754966159	-0.530829	-0.0756786	0.076020204140206	0.00924183169860552	green	black	green	brown	blue	SLC2A3
CHIT1	-0.676228		0.686515377875793			0.335226326327372		0.754730343587953			green		black			CHIT1
TLL1	0.917867934898659	0.893893069666293	0.685420433599548	0.287201022391537		0.303949923979304	0.345752117202831	0.282879021969007	0.0286818497747503		green	blue	brown	brown		TLL1
NME1	0.966398389824241	0.954130140047885	0.983724585283202			-0.0774174	-0.111275	-0.158871			purple	black	green			NME1
TEK	0.941057549194096	0.209694207995913	0.785084162840154	0.0938397339026675		0.103618551013971	-0.288908	-0.318372	-0.403608		green	green	pink	brown		TEK
TAOK1	0.927823943490929	0.902062815700276	-0.93811	0.962074979926557	0.955040176435032	0.119091293422047	0.158566765999548	0.105791054869082	0.105697689244666	0.083032917237095	green	green	green	brown	brown	TAOK1
AKT3	0.958906181720221	0.903545799399347	0.945663639664628	0.980833620571662	0.979879386997588	0.20826434213266	0.107221346076795	0.104212802445327	0.0459544624552416	0.0420377019133485	green	green	blue	brown	blue	AKT3
SLC25A6	0.989686052277619	0.979002898908235	0.987761583155048	0.553097618263521		-0.157435	-0.181707	-0.20018	-0.252391		purple	black	purple	brown		SLC25A6
BMP6	0.89881890296783	0.781354191974406	-0.682703			0.274401207941437	0.324123714806436	0.303568535704362			green	blue	green			BMP6
TUBB4B	0.969650715285228	-0.907553	0.976138627509534			-0.124483	-0.0183394	-0.149364			purple	green	purple			TUBB4B
HLA-A	0.951737819582844	0.962811233451441	0.984176514831339	0.769257511464318	0.943690841180583	0.14135257606041	0.0376794710644202	-0.0941502	0.102875070017743	0.101914946144463	green	black	purple	brown	brown	HLA-A
SLC6A4	0.571042619454468					-0.216518					brown					SLC6A4
SUMO2	0.977922720830198	-0.973792	0.982660406571484			-0.0948824	-0.0580103	-0.131709			purple	green	purple			SUMO2
PDE7B	0.935587365853301	0.948028303707463	0.875105703871429	0.722939605457912		0.365744974871626	0.285465610707681	0.371468431806943	0.521385834324684		yellow	blue	blue	yellow		PDE7B
VIPR1	0.810368034558553		-0.102185			-0.14256		-0.268633			brown		green			VIPR1
HINT1	-0.978085	-0.971055	0.976637770312392	-0.275696		-0.111211	-0.0835678	-0.133233	-0.373672		green	green	purple	brown		HINT1
NCF1	0.818954636243509	0.741097131459476	0.769077243602857			-0.345039	-0.0861367	-0.306369			purple	black	purple			NCF1
EGFR	0.923929814293654	0.945523626536353	0.879324827097116	0.958961793973941		0.141297470500365	0.0513877427283553	0.192717218826951	0.0270833322546108		green	brown	brown	brown		EGFR
PABPC1	0.962486484200374	-0.910159	0.974328137288829	0.959262554805649	0.931868469681394	0.0945748857029221	-0.0734126	-0.233959	-0.0113678	0.035768089134356	green	green	green	brown	blue	PABPC1
CCR7	0.875811439697037		0.802260654706552			0.0753701204854936		-0.0410653			purple		purple			CCR7
HSPB1	0.886008633219879	0.888876049548859	0.909192127089721	0.446024951910859		0.0317198835090275	-0.0881333	0.014458074583315	0.255431818597175		purple	black	green	brown		HSPB1
CTSH	0.864541625435858	-0.586211	0.809160952363482			-0.0945376	-0.342188	-0.21002			green	green	green			CTSH
PTK2	0.967897986024337	0.973587033005561	0.966092485836052	0.933826961959948		0.184878459043332	0.220018977242605	0.285819773669294	0.127728433624725		magenta	brown	brown	yellow		PTK2
ABCC4	0.943625552225434	0.873561410447408	-0.92903	0.830798611373635		0.128507106191851	0.032123606452639	0.22092861515699	0.135826979610377		green	green	green	brown		ABCC4
CD2	0.888615577608753		0.841013135334157		0.897062702891739	-0.0407358		-0.0398208		0.107557355188649	purple		purple		blue	CD2
PARK7	0.974046353769829	0.975884077611821	0.977989201276896	-0.348561		-0.126909	-0.118018	-0.163648	-0.457926		purple	black	purple	brown		PARK7
MYL12B	0.974449633169155	-0.959853	0.977444504478651	0.381909027696652		-0.16886	-0.135037	-0.16137	-0.163795		purple	green	purple	blue		MYL12B
DUSP4	-0.86855	0.7110736421768	0.899473545813405			0.123369624648596	0.314835779611598	-0.0359863			green	black	purple			DUSP4
MAPK10	0.887600116453567	0.96081236677115	0.959824717511892	0.92190266288498		0.126838338749559	0.191862922609245	0.271327399579319	0.259472347721903		green	brown	brown	brown		MAPK10
CALCRL	0.919667206848896	0.357498360891007	0.807917350051337	0.701876915318741		0.176737293778939	0.0282647687042794	-0.198766	-0.100821		blue	blue	pink	yellow		CALCRL
S1PR4	0.911720111394416		0.927478865644549			-0.23614		-0.185292			purple		purple			S1PR4
PDE1C	0.824125471205017	0.809379348175867	0.715882599209401	0.785348022647201		0.084755857832037	0.168599236004041	0.119070718961997	0.195715754110416		brown	blue	brown	yellow		PDE1C
TUBA1A	0.939092415463892	-0.937357	0.96129420863594	-0.0311326		0.0120865067177051	0.00396455481010534	-0.0676232	0.241841991568542		purple	green	purple	brown		TUBA1A
PSME1	0.975801489210898	0.982018698750386	0.989452992851003			-0.169959	-0.140915	-0.187163			purple	black	purple			PSME1
GSTM3	0.920460016181575	0.867212101768079	0.926285803536275			-0.0361508	-0.0564394	-0.140339			purple	black	green			GSTM3
PTPN13	0.884960134009411	0.821661494676429	0.938839901986943	0.951901592643739		0.024246538079441	-0.040808	0.153806283484614	0.125957542271717		green	green	brown	brown		PTPN13
PGAM1	0.945848870911283	-0.918138	0.968993839594986			-0.102895	-0.0548049	-0.15101			purple	green	purple			PGAM1
PPARG	0.90063830834048	0.641081209047775	0.955147042393886	0.700263459588033		0.00854470694605862	0.059607532417768	-0.150466	-0.0732762		green	green	turquoise	yellow		PPARG
NOTCH4	0.934296216235018	0.33910648088808	0.794329324072198	0.363328519698496		0.169540026556047	0.0606744057077061	-0.108795	-0.263533		green	blue	pink	blue		NOTCH4
ESR2	0.922748637988337	0.756078202996869	0.483026275512655			0.421452710305681	0.202700137205784	0.546773005268499			yellow	blue	brown			ESR2
PEAK1	0.967826484831939	0.918782549639504	0.966940662459687	0.960689008363507	0.736111872748454	0.229765801235774	0.0645629835281602	0.206988167014274	0.0735878948669124	-0.215392	blue	green	blue	brown	blue	PEAK1
FER	0.968597008246599	0.924496590563276	0.982341813037997	0.981502971946364	0.767877704451298	0.028712621649301	0.0553814533416102	0.111517497884382	0.0842977986909751	-0.132091	blue	green	blue	brown	blue	FER
HSPA1A	0.308114446965085	0.705285105051695	0.756396872491514			0.257677488000909	0.10513670882604	0.057991753510033			green	black	purple			HSPA1A
PRDX4	0.958722261342723	0.971308781120485	0.970671372071955			-0.0371964	-0.120665	-0.108655			purple	black	green			PRDX4
PLA2G7	-0.828686		0.393865721651274			0.0159360289389557		0.361672966927396			green		green			PLA2G7
CSGALNACT1	0.904525776048074	0.82133936345973	0.818726556974853	0.896201947514793	0.923640625692439	0.327061274968496	0.232855618537136	0.108247160430866	0.343107817657413	0.121915461971922	green	green	brown	yellow	blue	CSGALNACT1
ITGA1	0.881148932180155	0.58195296142834	0.68368551741937	0.973888805321012	0.792679823930679	0.201798048932453	-0.0644801	-0.101796	0.04336594779986	0.306608124347782	green	green	magenta	brown	blue	ITGA1
CCRL2	0.920409043762772	0.847107579525711	0.933125455968911			-0.230311	-0.448633	-0.262312			purple	black	green			CCRL2
ABCB1	0.90862901801591	0.766290488402425		0.284958335663736		0.327636738841275	0.2200231767151		0.171501332685828		yellow	green		turquoise		ABCB1
PRDX2	0.965872540574951	0.971987259625437	0.964202323467394			-0.146905	-0.153229	-0.126708			purple	black	green			PRDX2
NR5A2	0.914781399279453					0.27698093069265					yellow					NR5A2
CA4	0.387075021831171		0.523271578332565			-0.298655		-0.427456			brown		purple			CA4
FGG	-0.312225	0.332466717235848				-0.34637	-0.282538				green	black				FGG
KCNQ3	0.891179113541108	0.84460534406975	0.887768161519993			-0.0272463	-0.0515504	0.154728018569737			blue	green	brown			KCNQ3
PHLPP1	0.944191423712757	0.919843168153925	-0.917192	0.905318396525724		0.146295892537388	0.183916334479641	0.162853396165012	0.0685223143271511		green	blue	green	brown		PHLPP1
MRC1	0.938686095829225	0.153599434412472	0.87207708714762	0.309452200111031		-0.0710726	-0.15261	-0.194475	-0.13058		green	green	turquoise	brown		MRC1
RPS6KA2	0.963449139908312	0.717871010440253	-0.924076	0.904120629382895		0.167758972854668	-0.171723	0.117261782468358	-0.187054		green	green	green	brown		RPS6KA2
GABARAPL2	-0.979974	0.976202267665643	0.97579499072201			-0.101201	-0.0950379	-0.146884			green	black	purple			GABARAPL2
LYN	0.906713872368945			0.734936952118338	0.730761008911772	0.0233564787395518			0.0488160282352706	-0.161967	green			brown	blue	LYN
ST6GAL1	0.920299909104819	0.668801706824141	0.856640942648868	0.696398093790198	0.960661975413805	0.377058191060143	0.560660412153815	0.576965634436865	0.334281452668164	0.188692529561323	green	green	brown	yellow	blue	ST6GAL1
ACSL1	0.898377422017257			0.462441142021561		-0.172442			-0.285624		blue			brown		ACSL1
PDE3A	0.902835244950513	0.834244370046451	0.91632002459928	0.928352503094103		0.170664690589548	0.380154935246862	0.410600963621856	0.24634368295885		green	blue	brown	brown		PDE3A
ITPR2	0.946667606634677	0.907850626186691	0.985209895213119	0.977768006558443	0.989109770138963	0.0821082819075073	0.0266749448533079	0.0565241222849406	-0.0113354	0.0752050711531174	blue	green	blue	brown	blue	ITPR2
ACACA	0.940669451601184	0.883055564603743	-0.946436	0.968604973567902	0.883612795829662	0.0154380193274244	0.00664094530022803	0.0856385264263323	0.0456221287746969	-0.00635561	green	green	green	brown	blue	ACACA
GAB1	0.941959569868606	0.890302377071162	-0.947453	0.946631467702177		0.104860814469581	-0.0235035	0.180286556607905	0.103989427847994		green	green	green	brown		GAB1
SLC22A3	0.819484442053742	0.933371196314384	0.880921664668474			-0.0518938	-0.203151	0.0277026529757672			green	red	brown			SLC22A3
PHPT1	0.970686407279364	-0.968651	0.971653024095635			-0.0775257	-0.0621764	-0.129089			purple	green	green			PHPT1
FOS	0.575928828601746	0.844978990351143	0.8374036310656	0.723512161841593		-0.210744	-0.145477	-0.219578	0.0206809464598469		green	black	purple	brown		FOS
CTSB	0.974544197801655	0.856657328351249	0.893383582646024	0.684642673552735		0.143460986625735	0.173185364654369	-0.00959624	0.232857085406272		green	black	green	brown		CTSB
SERPINF1	-0.874334	0.774333466864466	0.921434965420091	0.494136640936012		0.123959465556317	0.203696370092988	0.107983996415609	0.122832756767647		green	black	green	blue		SERPINF1
NEDD4	0.939630889392908	0.849852561509211	0.838898425809921	0.903807550028378		0.140495143159824	0.185455012708752	0.266985897594044	0.190592375926818		green	brown	brown	brown		NEDD4
ADCY4	0.894785769947186	0.342552668481589		0.564058861706875		0.281708554462914	-0.0685867		-0.0281964		green	green		turquoise		ADCY4
NLRP3	-0.737442		0.123692661522502			-0.267278		-0.38127			green		green			NLRP3
IRAK3	0.896144251403068		0.89626605676294	0.949479061493481		-0.0157369		-0.204733	0.0484274455098456		blue		blue	brown		IRAK3
CACNA1D	0.908986959883296	0.938012528318284	0.922874829845954	0.956609661235513		0.0311174784773796	0.250286572923318	0.118490804250897	0.0885491374290809		blue	green	brown	brown		CACNA1D
PRDM16	0.933639714365594	0.953613674541341	0.938559993574551	0.191281709046468		0.0192476158850258	0.0737336294145573	0.221560944875699	0.152157825887977		green	green	brown	turquoise		PRDM16
FOSB	0.121457867036932	0.836864739439005	0.816692048100123	0.59312913191067		0.0640200646309674	-0.0250807	-0.0280341	0.0561329646025022		blue	black	purple	blue		FOSB
EDF1	0.99046923055716	0.992662049005888	0.978354385372069	0.50829366907739		-0.108114	-0.10593	-0.128979	-0.0346036		purple	black	purple	turquoise		EDF1
DUSP14	-0.888967	0.826303530888155	0.915854303393192			0.0541834673847336	0.196202501043997	0.00331060725834679			green	black	green			DUSP14
PLCG1	0.949651746260195	0.801927332992562		0.828338961996219	0.914613171251015	0.160401388269825	0.079198441230838		-0.0207903	0.052387507283339	green	green		brown	brown	PLCG1
TMPRSS4	0.896208800634833	0.89758060888601	0.842498561135362			0.435904167156684	0.562970707273686	0.564080382337681			turquoise	pink	greenyellow			TMPRSS4
EIF4A3	0.937699326960526	-0.942328	0.915244843695126			-0.216943	-0.161457	-0.19781			purple	green	green			EIF4A3
SNX3	0.970896400319655	-0.969062	0.980508396187256	0.543766596376908		-0.0913731	-0.0514978	-0.124313	0.335198033555143		purple	green	green	yellow		SNX3
YAP1	0.946225260576037	0.726827932268361	0.83036811704225	0.984653759858551		0.150887913271488	0.0810116386858002	0.206493844613831	0.139814164817632		blue	green	brown	brown		YAP1
CIB1	0.964557902311546	-0.883556	0.969438287981232			-0.13114	0.0139367084223284	-0.20523			purple	green	green			CIB1
KDM4C	0.944914579758101	0.982174034220497	0.987027266951619	0.991466603512655	0.989322103990957	0.158971356227872	0.123976220653657	0.0709922604593825	0.0938008951602293	0.0671977492655106	magenta	brown	blue	brown	blue	KDM4C
FLT1	0.864735963150555	0.146984288536478	0.147175018954259	0.516749256236865		0.248024269033124	-0.0151609	0.227876684069038	-0.168202		green	green	green	blue		FLT1
LTA4H	0.978221970636191			0.00391105849924274		0.0401926579820044			0.196184525392738		green			brown		LTA4H
DHRS9	-0.760276	0.722322932724897	0.561163469854017			0.24043772377779	0.366420103333457	0.460965915483242			green	pink	greenyellow			DHRS9
HDAC4	0.963883136889543	0.976903019713313	0.978475476912764	0.979001025987571	0.975281246096568	0.133196449115911	0.15363303907206	0.126328468812953	0.138527015035385	0.123429656909045	green	green	blue	brown	blue	HDAC4
PIP5K1B	0.865556986276656	0.720223434598351	0.878001247832594	0.12791031049265		-0.15139	-0.207718	-0.0742722	-0.143968		green	green	brown	brown		PIP5K1B
NR6A1	0.91531046651602	0.931760182664841	0.952099799515568			-0.0321453	0.0673056301595647	0.100953673169777			green	green	blue			NR6A1
CBR1	-0.954426	0.923135075481055	0.954780818594954			-0.205074	-0.208248	-0.142888			green	black	green			CBR1
JUN	0.779401957571749	0.900128588844601	0.895002564008003	0.719605035940795		0.0629671941709554	-0.164606	-0.0497273	0.0744851707791021		green	black	purple	brown		JUN
MIF	0.95070372757461	0.961070546650158	0.950879172449093	0.610126697234993		-0.22006	-0.214	-0.227596	-0.270544		purple	black	green	blue		MIF
RNASE1	-0.90439	-0.933638	0.889162804942304			-0.0603228	-0.0691218	-0.0329901			green	green	purple			RNASE1
UTRN	0.972363592729143	0.923884609067736	-0.964984	0.985872836379687	0.978133630435211	0.124722527813436	0.0492666640816275	0.0930869125548326	0.0684195764132901	0.0864243099223399	blue	green	green	brown	blue	UTRN
JAK2	0.946380401137806	0.940049222214468	0.983742311839232	0.957544065740586	0.917146586215648	0.207526707332244	0.174994274042321	0.107590377955353	0.0556892197356327	0.019329419478139	green	brown	blue	brown	blue	JAK2
SCN1A	0.788759347128263	0.726209826142565	0.724549391499945			-0.389501	-0.214882	-0.122336			greenyellow	green	brown			SCN1A
FAF1	0.975518659015718	0.967485270017608	0.978814069137447	0.957842773987916	0.982672505248579	0.199862353731487	0.13377614568251	0.106650891359321	0.117438835184977	0.0900604840873577	magenta	brown	blue	yellow	blue	FAF1
CDK17	0.937699774510195	0.881760424153025	-0.924462	0.925915665095855	0.975922265676117	0.2186620808491	0.177095708794134	0.155547007146122	0.167713660829479	0.0400490945788997	green	green	green	brown	blue	CDK17
POLA1	0.960439868193048	0.93334487725763	0.982552966466554	0.931501305555496		0.188685723657802	0.0244976826433855	0.106454330159931	0.112444376586315		green	brown	blue	brown		POLA1
SIK3	0.947286396513197	0.917986947600628	-0.96727	0.968398724068814	0.980263114253663	0.171423999120653	0.122689010024528	0.110123573816866	0.146202521322396	0.0909118022390277	green	green	green	brown	blue	SIK3
SMURF1	0.95461778765437	0.918398929445559	0.967627882075561	0.980455717493948	0.93959912598249	0.175793901252382	0.188215740628802	0.159603457672622	0.09817795574187	0.115682973616327	blue	green	blue	brown	blue	SMURF1
HES1	0.896246048356587	0.904939952730759	0.963775838882605			-0.127688	0.0797686576059083	-0.101102			purple	black	green			HES1
ING2	0.911156118823948	0.931582973653877	0.946326066202473			-0.0972052	-0.0962059	-0.0729547			purple	black	green			ING2
SLCO3A1	0.917908072618803	0.89792617110331	-0.956216	0.956635799890826	0.952695480534298	0.112460443250339	0.0823367492867561	0.122905038998607	0.165447551366044	0.0373608316202333	green	green	green	brown	blue	SLCO3A1
COL4A4	0.920709534059547	0.790397087764176	0.84443815119597			-0.219846	-0.166783	0.0509657519108655			greenyellow	brown	brown			COL4A4
MAST4	0.963279759919662	0.831459111055261	0.882467572521055	0.963703480150932	0.864292323148727	0.188877476124987	0.147906572585781	0.154723573277946	0.186114378924468	0.282976780427238	green	green	brown	brown	blue	MAST4
PSAP	0.979611348032444	-0.936194	0.951488497918453	0.842906110484024		0.096993558294507	0.0236425843294581	-0.0846273	0.155607853178335		green	green	green	brown		PSAP
GDF15	0.698253723237375	-0.744247	0.849051383484845			0.0865414456280916	0.166111952139995	0.0123319739980669			purple	green	green			GDF15
PRDX3	0.954718859857823	-0.980171	0.965342810938184			-0.155721	-0.0735546	-0.184615			purple	green	green			PRDX3
DNAJA1	0.934234577358649	0.930179728886723	0.945629554547855			-0.0882321	-0.0365784	-0.117194			purple	black	green			DNAJA1
PIK3C2B	0.913528380506848	0.614906224684539		0.440935686505228		0.269088481872623	0.237012822880136		0.17951228458851		green	blue		turquoise		PIK3C2B
TUBA4A	0.9521908690686	0.916364750901149	0.935486059067383			-0.170493	-0.130857	-0.276897			purple	black	purple			TUBA4A
HSP90AA1	0.907767168992039	-0.849409	0.916063702412596	0.681102207491486	0.377686159606574	-0.0441773	0.0705790933408046	-0.0774443	0.0267269422526805	-0.0103725	purple	green	green	brown	blue	HSP90AA1
FLI1	0.945294296208077	0.381308731521181	-0.938245	0.783456728584394	0.984062409281999	0.259210092156498	0.0686103932011817	0.0809315061949747	0.0961479228439797	0.0725988844794866	green	blue	green	brown	blue	FLI1
FLT4	0.941977784544785	0.00383489281482559				0.267809568378126	-0.368376				brown	green				FLT4
DYRK1A	0.947362085744713	0.871211171733414	0.966286966360902	0.984933874080942	0.979907663468483	0.148915524323951	0.199204806810549	0.161408443050028	0.128075200055285	0.0882165605152599	blue	green	blue	brown	blue	DYRK1A
ASAP1	0.92802634711585	0.883173217464629	-0.93572	0.98145953746873	0.947958125818792	0.240597792416718	0.207907390577766	0.238006732159282	0.074004547597028	0.0471728552331204	green	green	green	brown	blue	ASAP1
IDO1	-0.0614162		0.661724181590454			0.244083665270403		0.154361825017311			green		purple			IDO1
SLC11A1	0.803967117281942	0.312690449062722	0.851541828115664			-0.168304	-0.328411	-0.277171			green	black	turquoise			SLC11A1
PGRMC1	0.940991824722334	-0.972884	0.971326097930425			-0.0929377	-0.0607301	-0.0844549			purple	green	green			PGRMC1
SERPINE1	0.563062310613387	0.13365475184877	0.146168252696192	0.737625290018747		0.164457562133523	0.110955466558791	-0.0381536	0.0579270133718137		brown	green	green	brown		SERPINE1
PDE3B	0.883476441147836	0.84180133239293	-0.935565	0.93879575493315	0.954782022636097	0.165992247811305	0.146905926201725	0.00783143410279347	0.196526978836629	0.173538540715549	green	green	green	brown	blue	PDE3B
MET	0.866778637819065	0.727171807689375	0.816073390319849			0.310874273179287	0.180656979128617	0.244099297723673			green	brown	yellow			MET
NUAK1	0.796409764523589	0.566999765515073	0.792665978322537	0.794666637267694		0.231404599981072	0.284884284912272	0.0577243460550948	-0.141844		green	blue	pink	yellow		NUAK1
SAMHD1	0.9200532507702			0.892011233322831	0.941427485023154	0.0549083428198088			-0.0515038	-0.0458129	green			brown	blue	SAMHD1
LGALS3	0.951078585865118	-0.952823	0.95750220399701	0.829491799255376		0.0464163216964268	-0.0674993	-0.105347	0.255796040572204		green	green	green	brown		LGALS3
BAZ1A	0.929795260263305			0.910444913519988	0.952037857988956	0.0859127372019867			0.114452706116451	0.119653701511043	green			brown	blue	BAZ1A
CDA	0.656393341711818		0.712097360072214			0.0322215191791212		-0.23371			black		green			CDA
HIVEP1	0.947105736960008	0.883894888973514	-0.949955	0.90656273664344	0.723132424424654	0.239303855810645	0.210368993347005	0.230912920440846	0.307679368992722	0.277693657519284	green	green	green	brown	blue	HIVEP1
DAPK2	0.899092474809721	0.803541909552921	-0.714307	0.648958286476486	0.726051650039513	-0.123775	-0.142499	-0.0294161	-0.0653316	0.140790081897763	greenyellow	green	green	yellow	brown	DAPK2
BAX	0.940738915787811	0.930607236234722	0.938436949918567			-0.0807093	-0.0299702	-0.213086			purple	black	purple			BAX
CALM1	0.971620804095658	-0.932603	0.971519864043565	0.822525251264372	0.50622116197626	-0.131786	-0.000167405	-0.136027	0.107474732798606	-0.294048	purple	green	purple	brown	blue	CALM1
HDAC8	0.946193314413668	0.930946964761641	0.96147522960683	0.981092000615657	0.915010312633251	0.143187981078176	0.0954019324978272	0.0288520944406987	0.11148497094172	-0.0446973	magenta	green	blue	brown	blue	HDAC8
THRB	0.965819046506159	0.874257822593259	-0.903678	0.955265950792043		0.137927279621247	0.115260558593848	0.128132592808319	0.116034474663959		blue	green	green	brown		THRB
NOD1	0.943519646285201	0.902083526743619	-0.975504	0.76223275124789		0.184853746265239	0.00571636320167857	0.107308940800208	0.197168815425438		green	green	green	brown		NOD1
MAP4K3	0.959849643334206	0.906889397025826	-0.957128	0.969927750827911		0.137034385382013	0.1240267699154	0.186126899687666	0.00849542537526227		blue	green	green	brown		MAP4K3
MLLT3	0.94660462645496	0.869829737379862	0.9177734053816	0.949038912298435	0.955087431392544	0.154741187802343	0.196772595625194	0.31250588792608	0.175802853445274	0.170217784709181	blue	green	brown	brown	blue	MLLT3
FOXO1	0.939775446959093	0.841785533596169	-0.914614	0.964299470133592	0.97661628804069	0.286121007451789	0.237632567518239	0.223494419529162	0.0176733686570616	0.142313637750216	green	blue	green	brown	blue	FOXO1
HPGD	0.329371117951747	0.573790845796266	0.688085044513518			-0.197119	-0.345252	-0.403863			purple	black	purple			HPGD
EEF1D	0.980690668624382	0.987109559922461	0.982475074518719	0.672239085387606	0.289899822543006	-0.1388	-0.133554	-0.17452	-0.0269404	-0.300481	purple	black	green	brown	blue	EEF1D
EIF3F	0.955612346843912	0.968652102322161	0.972674744479234	0.41812373777365		-0.189575	-0.197702	-0.185674	-0.438043		purple	black	green	blue		EIF3F
CISD2	0.955925402500933	0.972859016899698	0.972772908896001			-0.10228	-0.0537591	-0.109092			purple	black	green			CISD2
FPR3	0.811276622715568					-0.063442					purple					FPR3
SENP7	0.952550729624755	0.943565430043128	-0.972776	0.933550647224884	0.979541549412614	0.186349923389808	0.150629601748408	0.147159261373987	0.220474412174935	0.113128387175043	green	brown	green	brown	blue	SENP7
WRN	0.946506703109648	0.95957401313298	-0.936804	0.966880192457804		0.0968616546780338	0.127404725577686	0.0806912183489952	-0.00628539		blue	brown	green	brown		WRN
USP13	0.885535584320413	0.92071211451857	-0.893966	0.750751074122413		0.0648102955912982	-0.384258	0.0941926214311169	0.176221903925132		green	red	green	brown		USP13
DUOX1	0.658429813063206	0.426270234709157	0.853447362343295			-0.191764	-0.201957	-0.0661767			green	green	yellow			DUOX1
CACNA2D1	0.904330774839575	0.908657981627105	0.935443723260222	0.971998568813238		0.0427906863645358	0.282211213969247	0.32542141719424	0.120258364506766		blue	green	brown	brown		CACNA2D1
LCK	0.834108679090231		0.813535221557603		0.939818277815498	-0.205659		-0.213935		0.0315552551569531	purple		purple		brown	LCK
RPS6KC1	0.946377001946522	0.947089028029738	0.991028651819023	0.932847882779417	0.893408655510897	0.108195971699874	0.168695108608947	0.0822266887716146	0.100920367338489	0.00171596303793485	blue	green	blue	yellow	blue	RPS6KC1
VCAM1	0.250064630861315		0.818497133882175			0.602527384822739		0.229968993778903			purple		purple			VCAM1
NEU1	0.952900802049653	-0.954973	0.962240817736945			-0.161813	-0.154906	-0.152404			purple	green	green			NEU1
PRDX6	-0.93915	-0.933341	0.961889982238141	0.727769378592629		-0.249367	-0.245596	-0.17686	-0.127743		green	green	green	brown		PRDX6
EIF3I	0.956935398233714	0.97363524692697	0.985589018465787			-0.130856	-0.17025	-0.153429			purple	black	green			EIF3I
SMAD3	0.903195777398121	0.848335639674484	0.851905941871146	0.959900621364517	0.981942017764876	0.309298139068391	0.193643134786508	0.269466643578017	0.124798042001619	0.10692356793009	green	green	brown	brown	blue	SMAD3
PDE1A	0.891358265595245	0.756621560088511	0.780857792970449	0.925035167438883		0.429016179352304	0.277017783143205	0.50215504970036	0.28717497193171		yellow	brown	brown	brown		PDE1A
NQO1	-0.872639	-0.901224	0.952591936663924			-0.261025	-0.155415	-0.257481			green	green	green			NQO1
TNFAIP3	0.853412048705022	-0.642628	0.81445675664145	0.543918715285759	0.81160699662458	0.0249049916416965	-0.0874754	-0.286949	0.179252929064293	0.135594008352657	green	green	purple	brown	blue	TNFAIP3
HEXIM1	0.920462635770087	-0.912452	0.970130702504259			0.038503400649178	0.0380095365549456	-0.100273			purple	green	green			HEXIM1
ECE1	0.856747968983842	0.773192933559067		0.930683998882777		0.358974056490219	0.578406760940555		0.153458127156212		green	pink		brown		ECE1
KLK11	0.811616784056061	0.746383982926463	0.908931906483921			0.11350011571719	0.189568330727259	0.272089480606738			black	black	greenyellow			KLK11
NTN1	0.943164738912762	0.886412174355418	0.867518027744182	0.747899694274045		0.444158473970956	0.456356417838703	0.586663715458484	0.218340534430875		yellow	blue	black	brown		NTN1
PLD1	0.890740656841901	0.90938537109504	0.971437632747336	0.868638431191549		0.150869219426577	0.12816361902676	0.171434320168766	0.184259945964772		blue	brown	blue	brown		PLD1
EPHA4	0.914338390687672	0.766583804929224	0.823333642204087			0.254660623322646	0.0795459739122529	0.192483563897231			green	green	brown			EPHA4
ARPC5	0.95643275852077	-0.922162	0.950665703962801	0.391394678762846		-0.236003	-0.191278	-0.251979	-0.17459		purple	green	purple	blue		ARPC5
SLC1A1	0.940212046518612	0.832367233820345	0.681135868112736	-0.0285668		-0.0178843	0.079582530049956	0.164228159019383	-0.0699291		green	green	brown	brown		SLC1A1
MMP16	0.848124118731524			-0.0146016		0.593483874793206			0.644385037562216		yellow			brown		MMP16
PHGDH	-0.734051	-0.679124	0.737616509726922			-0.291543	-0.488709	-0.127326			green	green	purple			PHGDH
ADI1	-0.956334	-0.929366	0.975215110929023			-0.211192	-0.0463553	-0.183856			green	green	purple			ADI1
SGK1	0.847122892293711	-0.719781		0.385483375667328		0.0654651673068331	0.0180403879676641		-0.206106		green	green		brown		SGK1
LCLAT1	0.951232823069012	0.89356198734717	0.938870816593058	0.936206794779319		0.221078692873739	0.28559996642933	0.286378229771097	0.0592739377161295		green	blue	blue	brown		LCLAT1
TFRC	0.894644875608668			0.334746358376315		0.0534894964861547			-0.0378598		green			turquoise		TFRC
DCXR	0.884616960645849	0.898783338337713	0.929555184049066			-0.305115	-0.3562	-0.25328			purple	black	green			DCXR
CDC42	0.933291936210647	-0.735968	0.974458973529845	0.908527076230212	0.737249012144874	0.092064064415585	0.123693583651623	-0.12091	0.121740134089541	0.0225429449350064	green	green	green	brown	blue	CDC42
LTK	0.41888516964464					-0.00982617					brown					LTK
OPN3	-0.871088	-0.798225	0.620750382855861			-0.229562	-0.201221	-0.198112			green	green	purple			OPN3
HSP90AB1	0.938730994361311	0.943544159563369	0.959065521933504	0.535777779578439		-0.152477	-0.163276	-0.165487	-0.104846		purple	black	green	brown		HSP90AB1
SUMO1	0.963499592966096	-0.979973	0.963819559981303			-0.0762634	-0.0577837	-0.176848			purple	green	purple			SUMO1
CDK2AP2	0.93473575922022	0.968961347040487	0.967593288732862			-0.141174	-0.0756661	-0.146885			purple	black	purple			CDK2AP2
KCNMB4	0.790750634523307		0.463334836679728			-0.0985734		-0.040873			brown		brown			KCNMB4
ITPKB	0.913538571845666		-0.90944	0.66667307508424	0.941360821611904	0.241026658480602		0.313136752499115	0.0728947652767156	0.146912708084933	green		green	yellow	blue	ITPKB
TJP1	0.957511981445605	0.692629362552224		0.977683493821655		0.121231620712681	-0.0603861		0.062871740798881		green	green		brown		TJP1
NCOA1	0.966220455840754	0.934824059510415	0.983396788167184	0.982534654312845	0.983564857570708	0.202763389402743	0.0945489731934344	0.103840972639519	0.144724899336405	0.0502021482374293	blue	green	blue	brown	blue	NCOA1
GSK3B	0.970821653654479	0.96200320852067	0.981650221884362	0.952182225923416	0.966827527575486	0.157376327835362	0.0932458903949302	0.117286740793177	0.158003674456259	0.0608914659767256	blue	brown	blue	yellow	blue	GSK3B
DAB2IP	0.930258204018954	0.823859791348406	0.767784698373889	0.833023794088752		0.30006008454778	0.121638921019391	0.374210018770341	0.226875402920449		green	green	yellow	brown		DAB2IP
TNKS	0.951543192814292	0.982820960404273	0.972783902156272	0.951402818622933	0.979647153078779	0.173008922185666	0.139813927388286	0.069944289779009	0.125647309838039	0.0710599520319404	magenta	brown	blue	yellow	blue	TNKS
BAD	-0.948008	-0.961693	0.977213188845635			-0.0594423	-0.121537	-0.0934554			green	green	green			BAD
CDK6	0.888646782869031	0.838846501884297		0.897813526510735	0.901259817910618	0.288781773776149	0.232312619589233		0.272963932715815	0.132648506980177	green	brown		yellow	blue	CDK6
TACR1	0.844231124099524	0.689978703418318	0.72820169941669			0.472164697535369	0.57188039068191	0.538695370457003			yellow	blue	yellow			TACR1
CD86	0.767063848380233					-0.268946					purple					CD86
MSR1	0.843849642128244	0.536990810448335				-0.119495	-0.240809				blue	black				MSR1
LAG3	0.763255165526466		0.832698721225807			-0.0527004		-0.123322			purple		purple			LAG3
BACE2	0.905747175361686	0.568101252728835	0.720045722702457	0.841038841280878		0.480387582163173	0.528736546900435	0.492507785643526	0.32191841157782		yellow	pink	greenyellow	brown		BACE2
SLC4A7	0.847984969713031	0.806550657559621	-0.920071	0.856259826484784	0.951097439403836	0.342203587147225	0.329181543780605	0.33165028278632	0.168078835394284	0.0497345879275092	green	blue	green	brown	blue	SLC4A7
ACER2	0.878809612483891	0.910477872774039	-0.925539			0.284504271882047	0.307570178603071	0.114896373331614			yellow	green	green			ACER2
EPAS1	0.830722041927848			0.952069821841798		0.178762825121654			0.0273646829983647		green			brown		EPAS1
YWHAH	0.931480901057829	0.943644100409793	0.947622999967218			-0.165764	-0.107493	-0.07475			purple	black	green			YWHAH
AGBL4	0.870420834660345	0.945187024948505	0.877479779242355			0.126880919013845	0.208871364600447	0.23912830882042			green	green	brown			AGBL4
LEF1	0.863476947496514	0.665672475171673	0.445455722549536	0.250327577175548	0.815206035137298	0.605242688714789	0.495301438336399	0.180124872970378	0.423658418389279	-0.0524353	yellow	blue	purple	brown	blue	LEF1
ECHS1	0.94186060408357	-0.956849	0.966652381909354			-0.0495559	-0.0648246	-0.102253			purple	green	purple			ECHS1
RSL1D1	0.972315849305052	0.973564535200742	0.980425478515313			-0.171957	-0.191758	-0.215787			purple	black	green			RSL1D1
SLC8A1	0.901767263450854	0.665479473806833	-0.953838	0.932550083015013		0.130367745534673	-0.073401	0.120267447721721	0.17479236066505		blue	blue	green	brown		SLC8A1
AKR1C2	0.647414240683603	0.641282345497285	0.631048071841675			-0.325035	0.0620865491421725	-0.547127			purple	yellow	purple			AKR1C2
PIK3C2A	0.926218780866358	0.749855897488417		0.971511261245091	0.842964305424105	0.248796039731708	-0.00686718		0.0202227701391095	-0.0197487	green	green		brown	blue	PIK3C2A
EBP	-0.951394	-0.927828	0.963249510751464			-0.226516	-0.301996	-0.183213			green	green	green			EBP
PPP6R3	0.952508264658925	0.88837544040552	0.988807919018676	0.950006169152457	0.980133082851033	0.177163811077617	0.14869486957988	0.126536243247966	0.137975018219768	0.0748489691632559	blue	green	blue	yellow	blue	PPP6R3
FUCA1	-0.909124	-0.885032	0.892909729865883			0.0311821752480001	0.10159782327941	-0.0338905			green	green	green			FUCA1
RFK	-0.891395	-0.931538	0.956684458101091			0.0266832310642995	0.0465363744602382	-0.108597			green	green	purple			RFK
ATR	0.949474482216379	0.957993874535547	0.983798448636071	0.969103972786091	0.972619515916999	0.109464150351689	0.16058045316173	0.114330951523112	0.063298662774448	-0.0128056	magenta	green	blue	brown	blue	ATR
LY96	-0.836033	-0.757502	0.717039601953702			0.09450053906918	0.0837315141323487	0.0633672334219984			green	green	purple			LY96
SRM	-0.733259	0.889088159005013	0.950727868774834			0.039458958607486	-0.125798	-0.129626			green	black	purple			SRM
MAPK8	0.943992252970338	0.908982304012171	0.982077431500542	0.982504882937044	0.965733739724085	0.126100267158866	0.0954239986753678	0.0598254865121627	0.116693834635449	-0.0126554	blue	green	blue	brown	blue	MAPK8
ITPR3	0.909936365746821			0.779449513517004	0.8930314765196	0.0651834151423125			0.116917905543935	0.0400475494997523	green			yellow	brown	ITPR3
EPHA7	0.205582094419455					0.0637204257488811					green					EPHA7
DUSP23	0.944051195910877	-0.95393	0.975772665974323			0.01131073860908	0.0236399944576153	-0.0799507			purple	green	green			DUSP23
STK3	0.973625678795426	0.904100529288412	0.984284654859856	0.987465851515216		0.105879315426164	0.0416329729550218	0.115856611935977	0.097388854673339		green	green	blue	brown		STK3
ADRM1	0.957926306053352	0.963535420926304	0.982110431661739			-0.22113	-0.14746	-0.199124			purple	black	purple			ADRM1
SFN	0.695353863449351	0.85228176370082	0.765345998202314			0.0685606601460478	-0.130444	0.0775195247558313			purple	black	purple			SFN
DNAJB6	0.877891047761831			0.947683550295512	0.944758892836101	0.039632565813565			0.190734810130884	0.113751942691319	green			brown	blue	DNAJB6
NME4	0.916329069604238	-0.938516	0.951278482265712			0.0497051475143095	-0.0970328	-0.0546878			purple	green	purple			NME4
BCKDK	0.947759127036856	0.941362705203388	0.95214723972983			-0.126035	-0.0916302	-0.114426			purple	black	green			BCKDK
ORAI3	0.928389238674963	-0.930412	0.943566960963026			0.023574245596188	0.042856088776089	-0.0917221			purple	green	green			ORAI3
FMO5	0.823671023507064	0.803573175053901	0.699035939168365			-0.353685	-0.48091	-0.235561			greenyellow	red	brown			FMO5
PSMG3	0.951505278378921	-0.90082	0.973951536227488			-0.0495393	0.0945313944995257	-0.0858111			purple	green	purple			PSMG3
TNFRSF4	0.632719018321517		0.895942790770945			0.11255720558103		0.0193595895198524			purple		purple			TNFRSF4
ABCC1	0.943444338294991	0.953140705213713	-0.977386	0.942887720310372	0.961588484513228	0.192762779157761	0.226286792872054	0.0933549371052292	0.152867011402519	0.0482325917702459	green	brown	green	brown	blue	ABCC1
ADAMTS4	0.430302758659408		0.852652767005218	0.561974670096776		0.247715505899328		-0.0511246	0.0811987848012297		purple		purple	blue		ADAMTS4
EHMT1	0.95410713154612	0.938453978857139	0.975169288914531	0.988393693561174	0.977740699675592	0.156791272365415	0.174043881866775	0.112847872084871	0.13510727847192	0.0502992555334402	green	green	blue	brown	brown	EHMT1
DDX39B	0.955068233482967	0.920045376086422	-0.963191	0.975719142598025	0.936899245527014	0.0880453355928647	0.0398543622658505	0.0437295415556785	0.0466051268369161	-0.0177136	green	green	green	brown	blue	DDX39B
BMPR1A	0.832577635608429	0.880959647881091	0.91706746201284	0.975600460245267		0.0922327834680039	0.188146270858671	0.244279911466613	0.2123799446968		green	green	brown	brown		BMPR1A
ST3GAL3	0.918367313430821	0.919878133592601	0.952757510469682	0.973117510746597	0.84897276691135	0.173163761642343	0.10269320036963	0.204514470331431	0.0906505333689512	0.193482337476423	blue	green	blue	brown	blue	ST3GAL3
PDE8A	0.920197197227113	0.907501104335054	-0.944167	0.971724125399313	0.914865909950322	0.200016950633755	0.161674273508901	0.137207740111102	0.155992152483435	0.0214190506777486	blue	green	green	brown	blue	PDE8A
DCK	0.917747954593339	-0.919687	0.95817140833303			-0.0819237	-0.0721822	-0.136085			purple	green	green			DCK
TRPC6	0.798993035950775	0.854549883969426	0.836371931525484	0.910958655614328		0.227283752830563	0.478432715579051	0.266010160577528	-0.0402722		greenyellow	blue	brown	brown		TRPC6
SDCBP	-0.953576	-0.896633	0.941671948477682	0.641614242757942		-0.157596	-0.029878	-0.257463	0.248966088842849		green	green	green	brown		SDCBP
ADGRL4	0.80000618002073	-0.0760201	0.666682414116572	0.364847214326436		0.438582622812404	0.178794894879957	-0.0894143	0.0339843685124365		green	green	purple	blue		ADGRL4
ADK	0.912033680837409	0.830874010110409	0.937261715474146	0.992314120535447	0.966102314499864	-0.0356809	-0.00258617	0.020428394357541	0.111645553477565	0.06427464278347	green	green	blue	brown	blue	ADK
STAT3	0.939679038373404			0.975889602864734	0.929768222804904	0.0453485334853452			0.130865150078955	-0.0877712	green			brown	blue	STAT3
KAT6A	0.950144356072266	0.845972359221781	0.966620044527281	0.9592415489933	0.962061346813905	0.209283249187554	0.183667677267918	0.161629739977461	0.163615795325595	0.0877483963273963	green	green	blue	brown	brown	KAT6A
CA2	0.745879412490432	0.755011659900665	0.778052626084536			-0.496524	-0.43238	-0.237428			purple	black	purple			CA2
MAP3K5	0.949306713743043	0.894059471677019	0.97458674085241	0.965047109195442	0.986847629895915	0.0474596258220386	0.218151186851575	0.0976501402234183	0.0527630695655122	0.0871666484629667	blue	green	blue	brown	blue	MAP3K5
ANGPT1	0.399146708834421	0.558503150670214	0.733404582073052	0.898456315256533		-0.062987	0.194197015595387	0.11714453822007	0.0120478061126047		brown	brown	magenta	yellow		ANGPT1
RAMP1	-0.779306	0.675810811557082	0.858318634061137	0.405147111662885		0.070339920776633	0.277578177579447	0.059590383992958	0.31834801621847		green	black	green	blue		RAMP1
PDE9A	0.838285911324036	0.644397367075514		0.276157581950647		0.269082234662784	0.367403583586611		0.49907853338439		brown	blue		turquoise		PDE9A
PTPN4	0.881266285271145	0.891984985824949	0.804822843166516	0.951824720642395	0.958503281421974	0.0102873966748008	0.103450155880586	-0.0902229	0.19944084559858	-0.0422435	blue	green	brown	brown	blue	PTPN4
SLC25A3	0.970167701383746	0.968331134435358	0.971022732718242	0.726073177886836		-0.234079	-0.283183	-0.220126	-0.249541		purple	black	green	brown		SLC25A3
RAPGEF3	0.822135645270276	0.417144177646657				0.357468505480734	-0.117462				green	green				RAPGEF3
OTUD7B	0.929054435866866	0.850321503971694		0.911586700936147		0.0839866090281972	-0.0190356		0.126196471950665		green	green		yellow		OTUD7B
PSMB1	0.96639684078253	-0.943325	0.985320640385397	0.651808284462351		-0.197948	-0.148729	-0.213141	-0.186712		purple	green	green	blue		PSMB1
ALDH1A1	0.801512832588257	0.791582750578377	0.915316327529175	0.462820379132413		-0.201711	0.102693981975224	-0.0720914	-0.355593		purple	black	green	brown		ALDH1A1
SOS1	0.956878442644684	0.951885533086232	0.968452247857221	0.97167907541761	0.974160005062567	0.162984042392198	0.14209323808199	0.196894877175551	0.207345494186267	0.0359372426177981	blue	brown	blue	brown	blue	SOS1
BMP1	0.762286807749883	0.917933078617233	0.713925948305928	0.86412715299652		-0.097851	-0.340652	-0.0395094	0.115717469141191		green	red	brown	brown		BMP1
SLC2A1	0.534638890152106	0.848042693982981	0.721748051829604			0.342430424246528	0.360732754280438	0.291603365616675			purple	yellow	greenyellow			SLC2A1
OTUD1	0.796705164835755	0.72335369056182	0.703775317281349			-0.110716	-0.296148	-0.0556289			purple	black	purple			OTUD1
PCSK6	0.925408160584548	0.826176183427716	0.822303974306535			0.0615533155841224	0.287449523498532	0.209054816633386			green	green	brown			PCSK6
G6PD	0.892541024013845	0.880857095554132	0.879935518582993			-0.298306	-0.34827	-0.336752			purple	black	purple			G6PD
NRP1	0.87832446073578	0.66921385226748	0.883314843556914	0.964180916472113		0.227586643768945	0.41155057365632	0.235864510992778	0.0875254327233537		green	green	blue	brown		NRP1
ABL1	0.947935680112004	0.90360733798553	0.976740655402812	0.984935019607272	0.940269755267088	0.235072444114455	0.105593936747374	0.213411610532703	0.121591196213853	0.044219803514116	green	green	blue	brown	blue	ABL1
TIE1	0.81926056439476		0.76839087201403			0.311840664768559		-0.128681			green		purple			TIE1
PTPN3	0.875350218082737	0.849619585710665	0.771085070414407	-0.0591132		0.105897131718292	0.0918927401574575	0.164875041360474	0.452361530973692		green	green	brown	brown		PTPN3
KMT2C	0.977506919866781	0.855640544594672	0.993566612505007	0.994308247933076	0.966450009331743	0.0813486435898831	0.0778743385165808	0.0922816003897108	0.102253570456889	0.0659505809871095	magenta	green	blue	brown	brown	KMT2C
ITGAM	0.786900032114701					-0.125878					purple					ITGAM
ARPC1B	0.911710288866677	-0.976894	0.970238240320281	0.383549128439711		0.142071648333528	-0.163852	-0.188876	0.0541351134049444		green	green	green	brown		ARPC1B
SNCAIP	0.917033890742241	0.930948666526113	0.722435152925376			0.399275330741698	0.384298067388095	0.350552429150525			yellow	blue	yellow			SNCAIP
PGK1	0.81955551908578	0.883547032021823	0.954445833191162	0.652979702525656		-0.0209774	-0.216351	-0.183156	-0.0868663		green	black	green	brown		PGK1
MYC	0.795393187977534	0.938186279724076	0.929177859357413			0.113891736259034	-0.168029	-0.0271417			purple	black	purple			MYC
OAZ1	0.897066739958066	0.971606084175226	0.99127762150894	0.508653357448821		-0.297013	-0.179814	-0.176948	0.00744962754804851		purple	black	purple	blue		OAZ1
ARL8B	0.872576835916203			0.95708157040955		-0.0957883			0.0475419536528883		blue			brown		ARL8B
CASP1	0.898690330784087	0.826569889287459	0.881366777190524			-0.148206	-0.0305876	-0.245085			purple	black	green			CASP1
SETD2	0.953793279022843	0.889507110980685	0.974653137349548	0.938104359704639	0.965000889121061	0.201923516592995	0.211154110149292	0.11459150938752	0.136730150344084	0.0364937169321445	magenta	green	blue	yellow	brown	SETD2
TASP1	0.936215720599374	0.982924155474546	-0.932651	0.962833328781463	0.753977633240293	0.225096650224719	0.163521388230913	0.152490086020876	0.101226667499937	-0.194294	blue	brown	green	brown	blue	TASP1
ADRB1	0.225871447792925					-0.164637					brown					ADRB1
PIN1	0.968367807728194	-0.899323	0.966995450523463			-0.102225	-0.0535124	-0.140058			purple	green	green			PIN1
ALOX5	0.84696992636298		0.922078179913412			-0.108155		-0.24035			green		turquoise			ALOX5
NSUN6	0.903831801175308	0.870292267104606		0.908711755437787		0.245301539001449	0.0864913801468563		0.0800207721133652		green	green		brown		NSUN6
MBNL1	0.959151253904814	0.892657534323493	0.967651793932402	0.986007429621247	0.983111762984349	0.116065367227333	0.0880183822776102	0.0928581995618536	0.132034943180082	0.0786209706881846	green	green	blue	brown	blue	MBNL1
VDAC1	0.974540312111225	-0.935899	0.980138912436052	0.532780384005364		-0.16662	-0.0823348	-0.111413	-0.137525		purple	green	green	blue		VDAC1
ABCC8	0.453259074130687					-0.278906					brown					ABCC8
OSBP2	0.924627661871404	0.930831679839694	-0.903487			0.301115799865375	0.227763873953124	0.274581777767734			green	green	green			OSBP2
LTF	0.591435995833662	-0.792923	0.521329543135852			0.25909429378682	0.0668051784041303	0.0701050087481268			black	green	green			LTF
KCNMA1	0.64297371320343	0.605811897712137	-0.700472	0.298228400973827		-0.185746	0.0432334251136671	-0.0369166	0.298170283103712		blue	brown	green	turquoise		KCNMA1
ORAI1	-0.888116	-0.912214	0.948450511065871			0.0799759885318878	-0.129136	-0.107912			green	green	green			ORAI1
ITGA3	0.885088270005067			0.36364274278298		0.261325717125106			-0.208643		brown			yellow		ITGA3
IL1R1	0.892562605299382	0.584070337927038	0.681586337881983	0.882948189099887		0.258174539849749	0.285830639848955	0.11991240434912	0.0562743559138		blue	brown	yellow	brown		IL1R1
RXFP1	0.753493793230105					-0.01984					brown					RXFP1
TAF1	0.924999351088538	0.953171176153828		0.974410906951089	0.912660388283978	0.121279830789439	0.208797198557713		0.0689259459220972	-0.038683	green	brown		brown	blue	TAF1
INSIG1	0.85167158023767	0.815695081080974	0.860426437275394			-0.350994	-0.424929	-0.301584			purple	black	green			INSIG1
GRIA1	0.451351065417121	0.649829688848861		0.58145800022882		-0.319371	-0.139571		-0.294149		brown	green		yellow		GRIA1
PIKFYVE	0.917852699141862	0.904879421047131	0.974303145358331	0.980292829680351	0.93967785940523	0.0877050515469668	0.107222317746881	0.0508666202389969	0.106953742793845	0.0386709455679481	blue	brown	blue	brown	blue	PIKFYVE
ME3	0.934900076766761	0.935548947572854	-0.856337	0.903092269879415		0.268464178151836	0.260106569575218	0.158334760608031	0.239016110485595		green	green	green	brown		ME3
NTRK2	0.28673424160766					0.0438471594819351					brown					NTRK2
FKBP4	0.920574781844571	-0.892014	0.902777504328586			-0.0534753	-0.142107	-0.136538			purple	green	green			FKBP4
F2RL3	0.525023927415261		0.641399630147892			-0.0751267		-0.277109			brown		purple			F2RL3
SCN9A	0.876642210472047	0.717432486170147	0.776213357942097			-0.10427	-0.354405	0.12523183778908			green	green	brown			SCN9A
DCLK1	0.818523114185676	0.780333364350966	0.714077268677033	0.877292214513201		0.208231818349003	0.324408012570322	0.5835062686074	0.310654261190516		greenyellow	blue	brown	brown		DCLK1
AHSA1	0.937352011220524	0.904160862150044	0.956182951224505			-0.0728676	0.0534771207899765	-0.036311			purple	black	green			AHSA1
TCF7L2	0.86216460465007	0.831320066048548	0.896066931240953	0.953126729474546		0.146837679352537	0.355997241901729	0.0221893169716175	0.129139847672375		green	blue	turquoise	yellow		TCF7L2
APH1A	0.924007228699212	0.975781440058267	0.979665307897552			-0.0896879	-0.182244	-0.182786			purple	black	purple			APH1A
PLD3	0.920955669798124	-0.724309	0.888744457544323	0.799152751502746		0.147591401439811	-0.235817	-0.195948	0.255796438835994		green	green	green	yellow		PLD3
NAA16	0.88567516248605	0.890304001481777		0.968454135090534	0.915025073807886	0.13352614999126	0.0599580057270548		0.0256787837886193	0.0862381642692901	green	green		brown	brown	NAA16
FLNB	0.915460431308096	0.726666186416134		0.689263248524439		0.318844922123483	0.210295809997393		0.291795465979368		green	green		brown		FLNB
PKD1	0.918708605336112	0.769294246585715		0.859864853998939		0.265452339192029	0.232464598290951		0.0948993887116535		brown	green		brown		PKD1
MYOF	0.880797025101112	0.799334800600678		0.925731229768584		0.165494387450911	0.0944348408960809		0.204439204700626		blue	green		brown		MYOF
PLIN3	-0.93701	0.859941048698857	0.958900806297377			-0.0270971	0.0868400113894588	-0.143209			green	black	green			PLIN3
MGST3	0.959836244843452	-0.93068	0.973863938310282	0.799431460952309		0.0380390021627719	-0.152193	-0.197762	0.0308071846105708		green	green	green	brown		MGST3
RAC1	0.973706705275165	0.976685938123371	0.979243498179978	0.881536770985371		-0.13451	-0.0549473	-0.143468	0.201611158049445		purple	black	purple	brown		RAC1
LPAR1	0.79723682210103	0.871369326326246	-0.871801	0.949039559236505		0.157072384184095	0.417981801151909	0.327205089122818	0.137976949056289		greenyellow	blue	green	brown		LPAR1
NTMT1	0.90818024352414	-0.852576	0.965944692633374			-0.0178531	0.022935844397734	-0.138261			purple	green	purple			NTMT1
DAPK1	0.912556317380055	0.890237197874467	0.985528104465035	0.895616222088451		0.0844956278216128	0.00668557884148988	0.140806673875848	0.190847861873749		green	green	blue	brown		DAPK1
ROCK2	0.931422357459468	0.795474255292291	-0.858706	0.983018361255025	0.896779928821092	0.121313637459154	0.0624706097963895	0.129972935450174	0.0329746733066449	-0.0789484	blue	green	green	brown	brown	ROCK2
SPNS2	0.866875502784023		0.247485765332571			0.333468286548444		0.0267831592225109			green		purple			SPNS2
SLCO4A1	0.560825356075395	0.384468964436709	0.566536208976207			0.0155337361791327	-0.299103	-0.270137			green	black	purple			SLCO4A1
ASGR1	0.909331617118404	0.867868247921784	0.774381801378486			-0.246981	-0.270015	-0.339051			purple	black	purple			ASGR1
FRS2	0.936869335435824	0.866874406692114	-0.921526	0.975672142013004		0.191228344942176	0.187087176734619	0.222900708450597	0.170667526389262		blue	green	green	brown		FRS2
IMPDH2	0.921614702082878	0.967039829744256	0.969203323426859			-0.101233	-0.238981	-0.153713			purple	black	green			IMPDH2
YWHAZ	0.915395448009035		0.855997105325822	0.931640320920986	0.960602715052817	0.0488791913985108		-0.1148	0.12909481912002	0.00854577343713375	green		green	brown	blue	YWHAZ
AGTPBP1	0.865135416438511	0.867781710761926	-0.951335	0.853349502056216	0.934312020490996	-0.209351	-0.0980294	-0.055437	-0.168107	-0.0773225	green	green	green	brown	blue	AGTPBP1
AZI2	0.880078385365165			0.865735740545535		-0.0712387			0.0106359869250003		green			brown		AZI2
NR4A3	-0.10494	0.600863131763476	0.581388199974542	0.543239674865216		-0.155364	0.106439287078504	0.0132229471114203	0.00277231470694244		green	black	purple	blue		NR4A3
CSNK1G1	0.902596521884677	0.871002627134217	0.963897353968376	0.959558361866281	0.955147622810257	0.152215242205478	0.290631738498516	0.199613221891685	0.127726838281489	0.0749255872241205	blue	green	blue	brown	blue	CSNK1G1
ENO1	0.948026924050168	0.925665546382345	0.972022009153476	0.637094187514713		-0.226635	-0.314318	-0.182045	-0.0454438		purple	black	purple	brown		ENO1
PLAU	0.781359273228525	0.52900700736948	0.413249406256321			-0.00806254	0.310646969211409	0.242357224742874			purple	black	purple			PLAU
PAN3	0.963786473340562	0.96631826487468	0.966894741351176	0.952894683618658	0.989355942946951	0.197351733352405	0.219444980800918	0.132672522434383	0.115343292344192	0.0455796254377352	blue	brown	blue	yellow	blue	PAN3
CD4	-0.838474	0.739133491663089		0.0905063473668748		-0.0298143	0.296336525766765		0.286898684715741		green	pink		brown		CD4
CDK4	0.961122382870899	0.944974001290334	0.973721277199921			-0.0978812	-0.223281	-0.117251			purple	black	purple			CDK4
ELOVL7	0.799379026664445					0.0981467549335515					yellow					ELOVL7
ENTPD1	0.853725829927756		0.878005689658915	0.743510196881724	0.431865172867906	0.453019438706219		0.321323457791559	0.523633488903935	0.364132477363864	yellow		blue	yellow	blue	ENTPD1
ALDH1A3	0.693333535321254	0.69100034117664	0.452581708468971	0.489820179180644		0.523300461005153	0.492112709774784	0.451810895363382	0.325854308553279		turquoise	yellow	purple	blue		ALDH1A3
CTSC	0.897051798420705	-0.906742	0.821966452513937	0.638347139002955	0.728173695674223	-0.0108108	0.0373353152052324	-0.308337	-0.115708	0.161870045710013	green	green	purple	yellow	blue	CTSC
IL4R	0.917397358615798	0.703332960861336		0.957963700338438	0.726818766875122	0.187856914152412	0.364044333226248		0.0880326312034842	0.224414383372677	green	green		brown	brown	IL4R
YBX3	0.803082005632721		0.88530231429436	0.87444480262492		0.0832385373361906		-0.0659924	0.0140412042080135		green		green	brown		YBX3
HMOX1	0.446655503367668	0.744125454391622	0.434099961657491			-0.385707	-0.355277	-0.503096			greenyellow	black	purple			HMOX1
KCNN3	0.833540735074996	0.886007671280485	0.761558153282998			0.492712154171381	0.378085422730506	0.399294917750265			yellow	blue	greenyellow			KCNN3
BRWD3	0.902614321009062	0.932996005606559	0.971823037306315	0.966677196839048	0.904102848610604	0.206807869520143	0.0769695147508452	0.133012821020153	0.137298815294116	0.0606861039030539	blue	brown	blue	brown	blue	BRWD3
KSR1	0.873705732307358	0.913873833141728	-0.956285	0.86218552744495	0.809776430697672	0.307294443619307	0.495772872930892	0.14335527683219	0.353449845010389	0.155827417071714	green	blue	green	brown	brown	KSR1
HNRNPH2	-0.927955	-0.91398	0.921339589966206			-0.264337	-0.17402	-0.212585			green	green	green			HNRNPH2
TGFB2	0.902974063934612	0.742622933029501	0.513616087825055	0.355683896713246		0.155388416327968	0.278742085742923	0.434754038416252	-0.0624357		green	blue	brown	brown		TGFB2
ARRB1	0.869476962025459	0.855193648321854	-0.920401	0.678891487655789		0.0498587022896239	-0.0503622	0.0964134791975614	-0.0303163		green	green	green	yellow		ARRB1
SULT1E1	0.563573156424518					-0.0284946					magenta					SULT1E1
LTC4S	0.461339681635943	0.678235339503668	0.710589225973772			0.0648349330617687	0.0625599744961009	0.148910367053311			purple	black	purple			LTC4S
SLC44A4	0.909736845534372	0.929964486294879	0.899954821403135			0.267117351352198	0.414727346264126	0.186694582381721			black	yellow	greenyellow			SLC44A4
PTGS2	0.514805673844025	0.739494924611808	0.769162937048356			0.0036053245333499	-0.0108947	0.0308843015762898			purple	black	purple			PTGS2
RAMP2	0.74719292301581		0.909081463710739			0.0625924489929495		-0.124926			purple		green			RAMP2
STUB1	0.911282460986451	0.929382798480568	0.952304228673248			-0.104738	-0.105328	-0.138558			purple	black	purple			STUB1
LGALS1	0.358329757909732	-0.940116	0.987000639113828	-0.84054		-0.279374	-0.0834152	-0.133621	-0.187773		purple	green	green	brown		LGALS1
FGF14	0.78272210203553	0.955058191147805	0.764192543730626	0.932346192174295		0.212036290401311	0.338074319488761	0.435241486534836	0.179182397347454		yellow	blue	brown	brown		FGF14
OAT	0.875085508118983	-0.857839	0.930524154031797			0.00743700235328743	0.111477120043947	-0.0992664			purple	green	green			OAT
TEAD4	0.892913999658056		0.854276586761661	0.729004817864568		0.2183520853512		-0.0506676	0.0177664857501235		green		pink	blue		TEAD4
PIEZO1	0.855479084508445	0.618958994753554		0.745657462601029		0.155395511358252	0.0331332777595958		-0.0227444		brown	green		brown		PIEZO1
ACKR1	0.450607929100198		0.934953767636743			0.52103211352073		-0.0354062			brown		green			ACKR1
PPP3CA	0.892620826189658	0.902252247992147	0.884769901241879	0.975951435865563	0.970371093243191	0.21985128207303	0.126327900828813	0.14008717248217	0.169110060080066	0.0139128142856509	blue	brown	blue	brown	blue	PPP3CA
RYR3	0.846297378199624	0.697784508178586	-0.889745			0.427685750918535	0.112432045291938	0.199562047757129			yellow	green	green			RYR3
PPP1R15A	0.694181998132047	0.893976090263442	0.897178996053869	0.762806512151289		-0.137093	-0.165344	-0.215614	-0.192196		green	black	purple	blue		PPP1R15A
NCOR2	0.915135737974118	0.872749873140704	-0.950936	0.974492031293367	0.91550713921758	0.147654650596087	0.132456909635649	0.126790972611228	0.138972745189047	0.148966419034696	green	green	green	brown	brown	NCOR2
STK32A	0.832028950982388	0.81763894316461	0.725751010118849			0.0469690326747944	0.140155888816977	0.331216761442697			greenyellow	green	brown			STK32A
MARK1	0.926275856080918	0.919948329322172	0.736537075190447	0.871069942830836		0.311450783971836	0.341166677270228	0.349396946403212	0.147708375486463		yellow	blue	brown	brown		MARK1
COL1A2	0.415929156028306	0.509756299171504	0.643364858631813	0.90544984724861		0.45074015755173	0.364265315250317	0.286129315492391	0.298817660181483		greenyellow	yellow	purple	brown		COL1A2
MSRB2	-0.948966	-0.929877	0.947682338806068	-0.043342		-0.064259	0.00349663613580437	-0.139068	0.133242032817378		green	green	green	brown		MSRB2
ENOX2	0.946255414401897	0.957933133951133	0.947655784060287	0.859299905423533		0.153346416989965	0.214445010492627	0.0735548479615686	0.0742973927743926		blue	brown	blue	brown		ENOX2
ISG20	0.893762749828293	-0.907964	0.92459976450727			-0.200931	-0.184098	-0.225808			purple	green	green			ISG20
GABBR1	0.877707163454799	0.868151297671045	0.811047634610405	0.949335135068204		0.339787897022865	0.139139008196193	0.351478951745022	0.175231846563579		green	green	blue	brown		GABBR1
UBE2D1	-0.920716	0.796884794371076	0.902861901697356			-0.18431	0.112786594029486	-0.1776			green	black	green			UBE2D1
MMP2	0.561417624274374	0.484500706283232	0.677512274491872	0.826027556231722		0.2493048808317	0.197558338625393	0.280415541191414	0.172711943936084		purple	yellow	purple	brown		MMP2
LAMTOR3	-0.927233	-0.868761	0.920228581544993			-0.187789	-0.187886	-0.196766			green	green	green			LAMTOR3
UBE2V1	0.918230340723186	0.892304350407335	0.920990802796448	0.964746810788395		0.045297529748593	-0.0447372	-0.0343718	0.0725515124478175		green	brown	blue	brown		UBE2V1
MAN2A1	0.878974326408934	0.750390133526166	-0.874085	0.971021445066839	0.904480312330903	0.286380398002153	0.00634751780862302	0.202217914924269	0.0432563092856613	0.125605589815484	green	green	green	brown	blue	MAN2A1
GLS	0.887124531060316	0.601031370205968		0.982218396469226	0.973276201986958	0.0644120296328313	-0.0436706		0.149502287308015	0.0344896128242018	green	green		brown	blue	GLS
DEGS1	0.916382833408912	0.919983891422097	0.891998512774049			-0.104628	-0.238318	-0.0865117			purple	black	purple			DEGS1
DNASE1L3	-0.281079		0.75133797475043			0.144520230522918		0.115744513228524			green		purple			DNASE1L3
CREBBP	0.916859747750716	0.898887892132362		0.99098914602445	0.975488898662673	0.176232120458599	0.168354377704147		0.124597359153761	0.0127052010321539	magenta	brown		brown	brown	CREBBP
SYNJ1	0.900025865141665	0.93526027403707	0.983271037960325	0.819834325219962		0.0822763882900008	0.241127625873288	0.0706798516969465	0.199161421998949		blue	brown	blue	brown		SYNJ1
NR2C1	0.848905738516867	0.844761745926813		0.929788189171705		-0.0189093	0.0309766364150715		-0.079364		green	green		brown		NR2C1
ETV1	0.829249363082436	0.863320552902271	0.540706148335053	0.801749437099909		-0.277447	-0.274085	-0.115707	0.0150743601448823		greenyellow	turquoise	brown	yellow		ETV1
TRIB1	0.756480351377202	0.89607473578773	0.861242265521412			-0.0499951	-0.0852261	0.0568134713395481			purple	black	purple			TRIB1
ZMYND11	0.886069685113615			0.981309254378504	0.950354037367978	0.0339635167916155			0.146126059461717	0.13541522818983	green			brown	blue	ZMYND11
MAP3K3	0.894133304307907		-0.914707	0.895564784737778	0.876241209769614	0.37700560591792		0.182241672086681	0.132187806558923	-0.0493239	green		green	brown	brown	MAP3K3
CX3CL1	0.139762449529763	0.73622632395883	0.699743052301898			0.455680851384985	0.300304530063091	0.208647614485587			green	black	green			CX3CL1
SLC5A4	0.871321945016815					0.300832419716427					green					SLC5A4
POU2F1	0.893385464171921	0.947063307515351	0.956988431685327	0.975211829314677	0.84534015103934	0.0801991381325417	0.14171571769799	0.0345632771451036	0.0619817687655383	-0.0578651	blue	brown	blue	brown	blue	POU2F1
PNP	0.709168752002007	0.900929239137237	0.904195119765792			0.00388021369241127	-0.298938	-0.187503			purple	black	purple			PNP
WASF3	0.821362065369623	0.827548284624504	0.779588142754039	0.762998815637566		-0.0845664	-0.0378642	0.177879461577907	-0.217207		green	green	brown	brown		WASF3
MAP3K4	0.95218152272513	0.961034213478416	0.982536890578786	0.965519372703927	0.918079949633129	0.145504571808194	0.0755733294606766	0.0815412868384274	0.101101130794528	-0.0297645	magenta	brown	blue	brown	blue	MAP3K4
RARB	0.921166344828336	0.943657168249183	0.736289991690929	0.829023953784154		0.140270979770905	0.360178501070578	0.318972679960382	0.0906037210087423		blue	blue	brown	yellow		RARB
PIM1	0.847549470391697	0.780039580266107	0.766103596427709			-0.291033	-0.382948	-0.244317			purple	black	purple			PIM1
MAP2K4	0.935903857968791	0.837841814829261	-0.920981	0.976087571132183	0.884799471306124	0.106286244698064	0.164746403520644	0.124542116959325	0.169481319975721	-0.0451566	blue	green	green	brown	blue	MAP2K4
AGPAT2	0.8636202844444	0.933211157648095	0.960145507917106			-0.236571	-0.315263	-0.23423			purple	black	purple			AGPAT2
KCNQ5	0.888297134339805	0.842572884490749	-0.871036	0.267074311751014	0.788076907555636	0.33810151942861	0.334819376119365	0.316913219795641	-0.0181616	0.0761636594899503	yellow	blue	green	brown	blue	KCNQ5
FBXO11	0.888678763147627	0.814894659860457	0.960074823108356	0.978372907484364	0.983790421698877	0.2385112063909	0.241449640010138	0.130189138087212	0.167196595292929	0.103914942503797	blue	green	blue	brown	blue	FBXO11
NOX4	0.849470229037134			0.644128262950263		0.344934522198761			0.00692752601217925		blue			yellow		NOX4
LCAT	0.913978414474489	0.755737482437124	0.651637555841784	0.42746631788484		0.166559315984843	0.168152414017367	0.339528020923813	0.034599138020156		brown	green	brown	yellow		LCAT
SOAT1	0.893449186917997			0.886795094792683		-0.0766495			-0.0436507		blue			brown		SOAT1
KDR	0.867374092618889	0.788799520371672	0.594499267363794			0.315247760834407	0.51708799916354	0.188519323676188			green	pink	greenyellow			KDR
UPP1	0.724787285388966	0.768889525622934				-0.158186	-0.155906				green	black				UPP1
GABARAPL1	0.859965335001692	-0.832563	0.879260172691055	0.636293400025458		0.075887889721967	-0.14965	-0.308605	-0.122155		green	green	green	blue		GABARAPL1
GRIK2	0.708392278591393	0.893984944584932	-0.807211			0.163275732145341	0.226719627982048	0.327962116305621			greenyellow	blue	green			GRIK2
MINK1	0.866063390366862	0.919554322078969	-0.924442	0.808583942731695		0.342477857943187	0.214193286517253	0.13572461158983	0.139231616525173		green	green	green	brown		MINK1
CTSK	0.777703703913092		0.753885610990191			0.0669994733982028		0.180662608271775			purple		purple			CTSK
HIPK3	0.828023224356337	0.731147120712552		0.962892448802348	0.760146880637997	0.234774062656391	0.355958983302596		0.17944558905293	0.129954939596719	green	blue		brown	blue	HIPK3
MBTD1	0.924988391775135	0.916188839980476	0.978553159175998	0.959168075419936		0.178929484122718	0.256637029520643	0.13586741000491	0.219740031114591		magenta	brown	blue	yellow		MBTD1
NPR3	0.675526688532292	0.413156209439132	0.64570103374375			0.0636235701522124	0.0947000973910136	-0.302868			magenta	blue	purple			NPR3
HAX1	0.979363113775527	-0.918155	0.981284306765027			-0.0986286	-0.13564	-0.1879			purple	green	purple			HAX1
EPCAM	0.74232069231437	-0.948363	0.898237523220729			-0.212935	-0.0176571	-0.0466259			purple	green	green			EPCAM
C1R	-0.779541	-0.810978	0.939837174400516	0.872600945501622		0.0679472504128832	-0.0129262	-0.0415928	0.00241602476462467		green	green	purple	brown		C1R
BTK	0.746239479809939					-0.232723					purple					BTK
CD81	0.909551104049325	-0.904655	0.979077927902471	0.71111614948318		0.224312359428448	0.00428677565509549	-0.122328	0.233106513185124		green	green	purple	blue		CD81
ASH1L	0.951335037234608	0.795244415596457		0.931241020987678	0.978415251370608	0.112396885554874	0.121843965486469		0.0930629041102362	0.0732679004716646	magenta	green		yellow	brown	ASH1L
ITSN1	0.873370187956263	0.898270379309163	-0.95229	0.984182269075355		0.0841755896285354	0.108872054765732	0.110988601706581	0.128136575636044		green	green	green	brown		ITSN1
TARBP1	0.852992349648976	0.884475491847988	-0.949797	0.762115590802276		0.0923523224834184	0.20660391741715	0.172153878939753	0.403240877158037		green	green	green	brown		TARBP1
GUK1	0.948641011403855	0.983257209555864	0.984124382189663	0.56440580355473		-0.115899	-0.12837	-0.168668	-0.139862		purple	black	purple	brown		GUK1
GSTZ1	0.863598496108398	-0.8843	0.934273970303201			-0.160657	-0.0664517	-0.203085			purple	green	green			GSTZ1
ITPR1	0.876352580834746	0.874693300292738	-0.963515	0.941077415093873	0.967819480304398	0.166713801741736	0.27165377247608	0.163127522772048	0.0945984710515456	0.149444337141334	green	green	green	yellow	blue	ITPR1
DCUN1D2	0.870286870255631	0.82853214263171	-0.967333	0.615234668897801		0.154949347715646	0.0441029102403906	0.0956251964773325	0.286488095347957		green	green	green	brown		DCUN1D2
PRPS1	-0.920312	-0.910777	0.922770282582958			-0.107191	-0.0603784	-0.212368			green	green	green			PRPS1
P2RY1	0.492461916181462		0.0684596417265835			-0.375521		-0.616853			purple		purple			P2RY1
TRIM24	0.87669162888176			0.7774545260772		0.226880911774379			-0.131749		green			brown		TRIM24
EPHB4	0.821266692903357		0.601151310298614			0.266932123782692		-0.109991			green		purple			EPHB4
NR2C2	0.895473305170723	0.936399072385413	0.970709052444125	0.972607247960947	0.926291316104886	0.139251605315685	0.205706574894734	0.118846571517027	0.138109468581406	-0.040663	blue	brown	blue	brown	blue	NR2C2
NCOA3	0.938675603127894	0.848022647867744	-0.95919	0.956418583462684	0.960298985538667	0.149879806807899	0.236581385823132	0.194738563340244	0.0136678362958879	0.138275630885495	green	green	green	brown	blue	NCOA3
APC	0.927527045533072		0.960589393265278	0.952261678456416	0.895855961258328	0.129292249843678		0.0620578256403078	0.0867075823943786	-0.0823775	blue		blue	brown	blue	APC
NOTCH1	0.828321561823735			0.541640602260193		0.127349735145599			0.126527159717249		green			turquoise		NOTCH1
PI4KA	0.926217235529139	0.908433194851717	-0.975143	0.972381488365367	0.949228772518034	0.120558445967017	0.119748778231479	0.0887908576525932	0.0538832340730869	0.0671834612369533	green	green	green	brown	blue	PI4KA
LAMB1	0.821873554813586	0.484414208231755	0.491307028314758	0.957089799175496		0.219488418994408	-0.0758737	-0.207979	-0.0373594		blue	blue	brown	brown		LAMB1
PIP4K2A	0.79850132849397	0.914075758199573	0.894313614734255	0.962612706257147	0.979426119844306	0.259559139128741	0.298789621106524	0.0935794357627147	0.0347955448222871	0.0299984274318655	blue	brown	blue	brown	blue	PIP4K2A
RORA	0.898123151564435	0.944363807744921		0.946449563711687	0.977093328020946	0.202560899491783	0.186566409975803		0.144531840785385	0.0731076840844744	blue	brown		yellow	blue	RORA
AHCY	-0.823599	0.928951776077423	0.9523394736335			-0.141695	-0.12929	-0.0863283			green	black	green			AHCY
SCNN1B	0.82518817491737		0.7215254862457			0.146491068353033		0.266152498412238			greenyellow		greenyellow			SCNN1B
CYTH3	0.886883510930255		-0.838896	0.963306488659171		0.0617677481133763		0.328942594998687	0.196326991201644		green		green	brown		CYTH3
PKN3	0.881734614273731		0.302336690052149			0.199373913130376		0.0107272420080391			brown		purple			PKN3
DDAH1	0.882104953346573		0.804072871270974	0.84122325026585		0.125117929469188		0.102822197641117	0.00108307667921594		green		yellow	brown		DDAH1
NSD1	0.946709909738378	0.812437873066154		0.965322069775718	0.938841799493597	0.207370040614312	0.129985281869223		0.180179982039589	0.176609385281778	green	green		brown	blue	NSD1
RHOA	0.969243960119291	0.98059434965571	0.983949111611436	0.883163895595802	0.4012872410264	-0.119756	-0.109532	-0.125307	0.089811146314645	-0.175454	purple	black	green	brown	blue	RHOA
SLC23A2	0.890473546121477	0.887892979792535	-0.957211	0.970365805193932		0.262133802595096	0.0380080375492109	0.147201359169338	0.150218150862916		green	green	green	brown		SLC23A2
RBM3	0.968669128042666	-0.906591	0.962375147666507	0.629157225318174		-0.16222	-0.126847	-0.191105	-0.118947		purple	green	purple	brown		RBM3
PTP4A2	0.926883417374223	-0.849265		0.784428483959892	0.902801985500926	0.148106484815772	0.00537124479778704		0.0351008361014437	0.0908989555767089	green	green		brown	brown	PTP4A2
PTPRZ1	0.56324233399322	0.857276988336825	0.663412235070709			0.312864987620927	0.528292717407678	0.469495020567401			yellow	pink	yellow			PTPRZ1
IGFBP3	0.439442818571093	0.784984625424757	0.873515120434586			0.108137717036416	0.207343729268568	-0.0180835			turquoise	yellow	green			IGFBP3
FYN	0.889234666927797	0.77882882103817		0.954079789982856	0.979124427998269	0.114069845365626	0.330843191272019		0.125018936220902	0.0585310696452438	green	green		brown	blue	FYN
STK16	0.860494838287686	-0.915115	0.975005927634887			-0.128385	-0.10036	-0.193992			purple	green	green			STK16
CDH1	0.860214815975862		0.786350498426196			0.0269194662409349		0.374886283633481			greenyellow		red			CDH1
SCP2	-0.959236	-0.925986	0.944885061488049	0.89236252385247		-0.151795	-0.0656435	-0.156937	0.301665186362634		green	green	green	yellow		SCP2
DLL4	0.763909704395227					0.275482769311079					green					DLL4
PAPSS2	0.803809252110817	0.624264183365441		0.890854615645199		-0.120997	-0.273628		-0.0787245		brown	brown		brown		PAPSS2
EPHB1	0.921170250593098	0.906831385644278	-0.9049			0.302377999785396	0.0929063950466136	0.156015128533376			green	green	green			EPHB1
PPP1CC	-0.936061	-0.941937	0.970455109882609	0.417785141147072		-0.115796	-0.0915855	-0.123343	0.196711934030446		green	green	green	turquoise		PPP1CC
CYP4X1	0.748267283527957	0.508867902487103	0.816745553745124			-0.010945	0.408327123463119	0.223438881303308			greenyellow	pink	greenyellow			CYP4X1
SLC12A2	0.8372659310505	0.201748348114753		0.79957624473357		0.367973686858133	0.311308852147804		0.0461938894271947		blue	green		brown		SLC12A2
CDKL1	0.918447143492845	0.929468893290314	-0.904334	0.754300599310524		0.101655391491905	0.101746516342421	0.111430569361191	-0.125128		green	green	green	brown		CDKL1
RASGRP3	0.732096985017034					0.190828371377008					green					RASGRP3
RIPK1	0.842141799632681			0.946076459409987	0.784460275300701	0.0209345919348304			0.0603725857115863	-0.146311	green			brown	blue	RIPK1
HNMT	-0.8174	0.576723633212037		0.666702194683791		-0.182808	0.194603510885454		0.043412235223626		green	black		yellow		HNMT
BIRC3	0.816410299096035	0.796942240957017	0.890173161624964		0.425197531125732	-0.15168	0.0731760075658921	-0.000168437		0.0223096890974199	purple	black	purple		blue	BIRC3
SCD5	0.833176698920281	0.757123849679523	0.724564133519811	0.0727457027851702		0.13246112535765	0.353269500291573	0.460187079808138	0.352494111353013		greenyellow	brown	greenyellow	brown		SCD5
FASN	0.678785902895803	0.844945125254213	0.189944381361511			-0.388538	-0.52689	-0.368169			pink	turquoise	purple			FASN
ZMYND8	0.863033273821187		-0.901155	0.940736962725939	0.96549433473782	0.248376602087563		0.225997969355742	0.0348450795343087	0.0710413421748437	green		green	brown	blue	ZMYND8
TRPM7	0.946468718395168	0.905330729801376	0.987274856472122	0.990265731383954	0.977169643973808	0.130162386382315	0.0230943679843222	0.0846356511231438	0.0829128147061899	0.0576245809325698	magenta	green	blue	brown	blue	TRPM7
IRAK2	0.773344805633903	0.52668536806592				0.0532191082717164	0.351590843534515				green	blue				IRAK2
CYP27A1	0.841768788944551			0.751339120342626		0.0152349717478516			0.313406507070064		green			yellow		CYP27A1
MME	-0.41578	-0.21421	0.878317221245339			-0.657643	-0.27854	-0.386286			green	green	turquoise			MME
NOS3	0.720092068541149					0.241409255401976					brown					NOS3
INPP5D	0.766741801769665	0.80903400578743	0.909159186997494	0.329164152287337	0.967640952768996	0.401737749133429	0.456615311680354	0.163872419166011	0.184761974587923	0.0257790133182103	yellow	blue	blue	turquoise	brown	INPP5D
PSMB2	-0.968207	-0.957756	0.979208867184147	0.0755270987903525		-0.148816	-0.139584	-0.145371	-0.274191		green	green	green	brown		PSMB2
ITGB3	0.798290643965984	0.781998076414187	0.575960428315406			0.47919632689903	0.363914495755137	0.495590242505066			yellow	blue	brown			ITGB3
BRD1	0.887116377493317		-0.958174	0.931426144147775	0.887462921708013	0.165379980113221		0.138409854107393	0.301120771435231	-0.106939	green		green	yellow	blue	BRD1
CD58	0.824719274497628			0.644444439721001	0.916599304214581	-0.0676435			-0.113769	0.213366246934827	green			brown	brown	CD58
GK	0.812891159746223					-0.024482					blue					GK
RAB9A	-0.947578	-0.869367	0.945426846587345			-0.115073	-0.0622204	-0.232832			green	green	green			RAB9A
ARF4	0.902224421071064	0.946885823690272	0.968665464991042	0.643377356383645		-0.194334	-0.0770025	-0.197851	-0.0170903		purple	black	green	brown		ARF4
FABP4	-0.177201	-0.876551	0.826934754707205			-0.355416	-0.324126	-0.341329			green	green	purple			FABP4
PPARGC1A	0.835206235989807	0.769128545510809	0.720692078994012	0.538171630748288		0.0585552349222623	0.266781549750665	0.275365900532776	-0.123545		greenyellow	brown	brown	yellow		PPARGC1A
EP300	0.907382385573108			0.945952409056492	0.935689130383278	0.120826010763314			0.127406712228923	0.110467081365002	green			yellow	blue	EP300
KCNQ1	0.910865917091311		-0.942591			0.10676711842859		0.108934173512356			green		green			KCNQ1
LGMN	0.833814427478425	0.883375400132181	0.596192401028713	0.460371230182165		0.0714549966627005	-0.174105	0.407836960599262	0.0708227190133028		purple	black	purple	yellow		LGMN
TRPV4	0.849544444876049	0.8737478974217				0.439359027000623	0.551457042907149				turquoise	pink				TRPV4
MAP3K1	0.880063655182658	0.878825959872258	-0.93519	0.872344232204355	0.951839257336224	0.268891903403255	0.224511023286095	0.104300003963024	0.209793412040991	0.137371111807622	green	brown	green	brown	blue	MAP3K1
HPN	0.681316015003158	0.902902125297324	0.556367593533677			-0.327267	-0.551504	-0.251733			greenyellow	turquoise	brown			HPN
PDE4C	0.136437970280842	-0.485849	0.521950323900666			-0.0719101	-0.124542	-0.0520724			purple	green	green			PDE4C
RASGRF1	0.717695001738998	0.886157848810643	0.684481899309759			-0.247314	-0.212861	-0.0218685			greenyellow	turquoise	brown			RASGRF1
PHF23	0.653249070886211	0.897363424024979	0.887687321288157			0.00713667787341094	-0.110414	-0.0591223			purple	black	purple			PHF23
CTSF	0.687262872350234	-0.830864	0.819607742006129			0.229245997258892	0.0785955889495203	0.0847125668690492			purple	green	purple			CTSF
SLC16A7	0.884800835023852	0.653892284277893		0.776158855784121	0.908613552434323	0.229944762948488	0.11521354136913		-0.148739	0.0469719429358308	blue	green		yellow	blue	SLC16A7
MPG	0.903082298636466	-0.950357	0.975456578541982			-0.110911	-0.118648	-0.141151			purple	green	green			MPG
KAT6B	0.927737564277572	0.883855388901961	-0.959064	0.953558620139205	0.980289600064709	0.0635413776129991	0.093986731616094	0.0991437798209097	0.114790112174891	0.0381048117753436	blue	green	green	brown	blue	KAT6B
CFL1	0.894352746580194	0.990886346967528	0.988573617163468			0.0911636943228136	-0.136293	-0.161279			green	black	purple			CFL1
COL1A1	0.516331183771517	0.650983402640241	0.626572004765188	0.861535697868481		0.528767032631559	0.410631406130401	0.400538126460467	0.309424263490038		brown	yellow	purple	brown		COL1A1
JAG1	0.873529516107778			0.935798138413536		0.34033288771729			0.0485494304490454		brown			brown		JAG1
TIMP3	0.640061117755128	0.497475509188479	0.628585196673789	0.93892629881107		-0.0665487	-0.168128	-0.237805	-0.0810611		green	red	purple	brown		TIMP3
CBX4	0.705156069921045	0.812876446932746	0.827582077488721			-0.0837399	0.024149854360737	-0.0970794			purple	black	purple			CBX4
GMPR2	0.903750542737445	-0.935253	0.96216926286534			0.0097137013538461	-0.00522361	-0.10791			purple	green	green			GMPR2
SCNN1A	0.81577810557231		0.92808921937852			0.0115845704120155		0.17078455839415			greenyellow		yellow			SCNN1A
BAK1	0.877651815524268		0.904433246578198			-0.0316789		-0.193322			purple		purple			BAK1
EPHA3	0.4071140973871		0.620634560267671	0.708716089001998		0.286082763251084		0.477368735564158	0.421158457755623		yellow		brown	yellow		EPHA3
SGMS1	0.950992141731133	0.924899692908486	-0.926461	0.976491625619485	0.898392991885881	0.0720741809715187	0.0829039097678752	-0.0139245	0.145288694094267	0.160484312084903	blue	brown	green	brown	blue	SGMS1
HHAT	0.844418496178506	0.94281492389226	0.852607241448444	0.258158129086741		0.434652301204569	0.445389557601794	0.475046144234808	0.551012400113087		green	blue	brown	brown		HHAT
DNASE1	0.849334671379748	0.839035826250579	-0.818853	0.671520728664414		0.354815263861449	0.41938779256958	0.326167201328209	0.2315803080265		green	green	green	turquoise		DNASE1
PDE2A	0.773524880305165					0.332399123046523					yellow					PDE2A
ESRP1	0.858972467415595	0.812981643452626	0.882956795114789			-0.143109	0.047178892838335	0.0938215815049749			greenyellow	brown	yellow			ESRP1
AKR1A1	0.967162172286483	-0.891063	0.925558287332123	0.404866298061976		-0.154734	-0.0680604	-0.0992155	0.0541528460927551		purple	green	green	turquoise		AKR1A1
CACNA1A	0.96044929579563	0.794686106320902	0.801472596919181			0.120634093702038	0.166836369438853	0.0816433551876096			red	green	blue			CACNA1A
KCND3	0.835616603436316	0.71754834085271	0.85143494158585	0.58050402639614		0.236138381094169	0.133025354163866	0.274650991732814	0.366391691868867		blue	red	brown	brown		KCND3
PLIN5	0.771001490191625		0.552363728176273			-0.104023		-0.356888			greenyellow		yellow			PLIN5
FZD4	0.864986106810942	0.197116322603267	0.592576754985434	0.196248138120015		0.30397672356155	0.0652154504849398	-0.221932	0.0646323165548106		brown	green	purple	brown		FZD4
SCNN1G	0.614454461571054	0.7932474687148	0.844706933092711			0.272562101851822	0.371410149937818	0.49407314477702			greenyellow	blue	black			SCNN1G
PIP5K1C	0.817580214392801			0.604163374428535		0.3770499869711			0.391649363064897		green			brown		PIP5K1C
TAB2	0.824204666753442			0.880430083128908	0.955211794031851	0.335238329512295			0.243943292642198	0.148351795286418	blue			brown	blue	TAB2
CKAP4	-0.709353	-0.916591	0.956789778682013			0.079766928781529	-0.0873082	-0.145793			green	green	green			CKAP4
PTPMT1	0.809753531753971	0.957507286041342	0.958912061565971			-0.33714	-0.165906	-0.186592			purple	black	green			PTPMT1
EGLN3	0.611256906332263	0.929970464752386	0.550766438820543	0.246013072035666		0.335894407953498	0.319000815890799	0.219381674735693	-0.120153		turquoise	blue	greenyellow	brown		EGLN3
PIM3	0.8848976838853	0.898365195994972	0.958249307415678			-0.158727	-0.159396	-0.202682			purple	black	purple			PIM3
FUT10	0.847059063858704	0.927990541107598	0.932812106219286	0.202749704372209		0.0312771693845163	0.0356723504851058	0.131764819553559	0.235550441711172		green	green	blue	turquoise		FUT10
PDE7A	0.884175366042842	0.798846742073205	-0.964499	0.921065096136057	0.94656351534486	0.154814328011644	0.183020549438246	0.230794367486862	-0.0198583	0.200689927302333	green	blue	green	brown	blue	PDE7A
REEP5	0.74375099650059	-0.951462	0.968869851674493	0.768285871621441		-0.115724	-0.107883	-0.163822	0.00877558008225102		blue	green	green	brown		REEP5
PTPRO	-0.558219					-0.235171					green					PTPRO
CXCL12	0.370296518515188		0.835332374936265	0.225227289531959		0.632631167030077		0.227563591985308	0.485346055953333		yellow		purple	turquoise		CXCL12
PDE5A	0.792743220457463	0.826270000063983	0.774265487186779	0.920062966254281		0.0575437862173393	0.123658086167057	0.319779840310131	0.115176835835265		magenta	green	brown	brown		PDE5A
AK1	0.893472354927403	0.95053760889738	0.892704269882231			-0.194712	-0.232358	-0.0495894			purple	black	green			AK1
ASF1A	0.875304857312739	-0.93119	0.950843378927509			-0.0884901	-0.109537	-0.23904			purple	green	green			ASF1A
BACH1	0.857042497674851	0.826085293710776	-0.939124	0.953237836937307	0.91452294287964	-0.0515527	-0.105691	-0.0620756	0.0604924703965316	0.0228070037741892	green	green	green	brown	blue	BACH1
PKP1	0.52046053211331	0.600722717489746				0.382466743922376	0.362207186443567				brown	blue				PKP1
INSR	0.690412724760881	0.2467948178283		0.906764455077145		0.478501430819842	0.43383348142129		0.0637337119628312		yellow	green		brown		INSR
CYBB	0.540545885821427	0.575875383469846				-0.0126954	-0.135031				magenta	black				CYBB
P4HB	0.9496137343562	-0.910145	0.974745700858582	0.755549541798469		-0.13011	-0.142262	-0.157615	-0.0535663		purple	green	purple	brown		P4HB
SFMBT1	0.869474571321372	0.884335775591928	0.921986621489084	0.860861091138014	0.934200847059489	0.0314927753257104	0.125946126840903	0.260521354026981	0.301578843280644	0.0107390979043683	blue	green	blue	yellow	blue	SFMBT1
LATS2	0.816626779864951			0.914222903800951		0.20944507115108			0.115572442460833		brown			brown		LATS2
ITCH	0.95389006475995	0.961636653570781	0.987308267989309	0.992508893691614	0.937342042479607	0.107107634677283	0.104348813142049	0.0312781566052223	0.090398092935847	0.00609798909914339	blue	brown	blue	brown	blue	ITCH
MAP3K9	0.805754119736249	0.846206916653295	0.73603679201009			-0.050464	0.0417776593239934	0.236376261338918			green	green	brown			MAP3K9
EZH1	0.835392435295997			0.785257591079901		0.0330919562475973			-0.107604		green			yellow		EZH1
NTHL1	0.737188554064002	-0.936483	0.917417347483584			0.0141145615694228	-0.12002	-0.040061			purple	green	green			NTHL1
RNF31	0.893601656331497	0.919715722855365	-0.971937	0.870180118434728		0.0770067477462364	0.0332311491289776	0.0581723815080287	-0.227446		green	green	green	turquoise		RNF31
KDM1A	0.840999809906318			0.882337699899005		0.149188471898477			0.142525179758928		green			brown		KDM1A
GPC3	0.378342764714549	0.416754359281581	0.511963379297649	0.73544727921777		-0.300329	0.0626420711028696	-0.223594	-0.156966		greenyellow	pink	purple	yellow		GPC3
HEXB	0.914747159879902	-0.928298	0.953109373780748	0.49386856362037		-0.0292178	-0.117449	-0.22705	-0.00394078		green	green	green	blue		HEXB
IL18RAP	0.386767059701116		0.238385512848327			-0.426523		-0.619746			purple		green			IL18RAP
CCT5	0.960146204331549	-0.825388	0.973231755406172			-0.0741244	0.00188939109109575	-0.152439			purple	green	green			CCT5
AQP4	0.242384071516755	0.760662028293942	0.690158111760592			-0.26845	-0.221375	-0.0425669			purple	black	purple			AQP4
NR4A2	0.795762414389878		0.860990103773616	0.544398664937106		-0.202631		-0.250015	-0.11502		purple		green	blue		NR4A2
ABO	0.733950556018949		0.710602603072836			0.0995177976344186		0.0811452853397938			greenyellow		greenyellow			ABO
ARF1	0.972310920957451	0.970259680484208	0.971298598248092	0.674346187756519		-0.153135	-0.160914	-0.232702	-0.229001		purple	black	purple	blue		ARF1
FAP	0.672908933138758		0.756592263576794	0.653611503888392		0.503370359684648		0.402191367859228	0.299478395473211		yellow		magenta	brown		FAP
TRPM4	0.822699120085068					0.178973933466437					brown					TRPM4
ELK3	0.84916081710947			0.715173298249654	0.80166858534123	0.448353587705572			0.285245761857784	0.0848349957433127	green			brown	brown	ELK3
OLR1	0.494968886002262	0.787479826427165	0.398399651731057			-0.258612	-0.145447	-0.206064			blue	black	purple			OLR1
KCNN4	0.572448262968582	0.708472082895932				0.322799692229032	0.62366655261912				purple	pink				KCNN4
RORC	0.709613258655197					-0.16741					pink					RORC
ALYREF	0.777551548655101	0.844750596917931	0.872962935510736			-0.0489384	-0.0849949	-0.0995311			purple	black	purple			ALYREF
BRF1	0.883843816177412			0.696192263128826		0.160531405465203			0.185640837919698		green			brown		BRF1
DCUN1D4	0.887558665522831			0.962845088271472		0.127797989953937			0.0883880669190985		green			brown		DCUN1D4
ARHGDIA	0.921571476565967	0.907676896168489	0.95449885989807	0.534926074806468		-0.156828	-0.126113	-0.208099	-0.209704		purple	black	purple	blue		ARHGDIA
NEK1	0.90200586522386	0.855721505004683		0.956179974680837	0.786732064770551	0.16660656601808	0.271823583125533		0.209892733377055	0.0899489374984654	green	green		brown	blue	NEK1
PDE8B	0.729112952813834	0.54750946272101	0.746840808755833	0.287590246245481		-0.00329491	-0.0683219	0.345575523199353	0.0919156428295298		greenyellow	brown	blue	blue		PDE8B
MAOA	0.828053704953202	0.606824908955771	0.585904786625714	0.721762045576134		-0.128351	-0.272532	-0.367504	-0.312463		blue	turquoise	yellow	brown		MAOA
AAK1	0.850261668455128			0.9832244021162	0.954739900979065	0.275884662347235			0.162734352938478	0.100361408463561	green			brown	brown	AAK1
LATS1	0.906525435176564			0.948757990241325		0.20015002730841			0.170728671561553		green			yellow		LATS1
MAP4K4	0.883602460316415	0.849055086609818		0.962380503397917	0.968958928059951	0.263183862987756	0.28492579985237		0.165438725191359	0.143808164389177	green	green		brown	blue	MAP4K4
TAOK2	0.903823461907826			0.430796023199292		0.252913857640732			0.316366045936217		brown			turquoise		TAOK2
MGST1	0.564414575518861	-0.820223	0.86044580895102	0.359603671116304		-0.288814	-0.191135	-0.215437	-0.284582		purple	green	green	blue		MGST1
EEF1G	0.643304865041449	0.4997660780443	0.385533310284603	0.466514274122056		0.00311812137227725	-0.122431	-0.192463	0.0534904427639716		blue	green	blue	blue		EEF1G
PSMC4	0.933800616301334	-0.927821	0.959200946986885			-0.220897	-0.137473	-0.242862			purple	green	purple			PSMC4
PPM1D	0.829088298854835			0.803819227424881		0.166651824298624			0.251899802743127		green			yellow		PPM1D
SULT1C2	0.209145394731688	0.318297466868216	0.592852950276191			0.0964324661926662	0.227757464539241	0.544857856014487			brown	green	brown			SULT1C2
HK3	0.667488605675332		0.653589537491623			-0.251398		0.0824290076758294			purple		blue			HK3
TPK1	0.85315494075114	0.827927980849143	0.930458206737925	0.818965521612965	0.695457369088555	0.00560561925568421	-0.0859208	-0.0104217	0.119972201191245	0.207935642319028	blue	green	blue	brown	blue	TPK1
KAT2B	0.813196706875223			0.783323627881342	0.967991981554214	0.152597278273896			0.114492728486642	0.0656662051400614	green			yellow	blue	KAT2B
APEX1	0.944821133476095	0.94092505829541	0.977026977648637			-0.246071	-0.241526	-0.20763			purple	black	green			APEX1
RIPK4	0.683456338912571	0.670763737879077				0.278431217762586	0.499447329052609				turquoise	pink				RIPK4
PSMB4	0.956471424215716	0.951571420940502	0.962255245515504	0.688117152994966		-0.164476	-0.200994	-0.162059	-0.251722		purple	black	purple	turquoise		PSMB4
TYMS	-0.716059	-0.308632	0.846787848669647			-0.0057997	0.0644334111484073	0.0500957418436376			green	green	green			TYMS
PPP3R1	0.888141458027363	0.809357535658181	0.946674621534897	0.884756845900473	0.951464694281009	0.199588115909028	0.126099508106178	0.0280514345443317	0.204099595480505	0.0262255246744837	green	green	blue	brown	blue	PPP3R1
MARK4	0.826793010562411			0.673955486763127		0.327761961938844			-0.00566238		green			brown		MARK4
GPD2	0.87099627666721	0.880074124446876	0.943523596626577	0.844692281125465		0.163263071224841	0.224460820371551	0.0967637875329692	0.0122334418411422		blue	brown	blue	brown		GPD2
PIK3CA	0.88670296646894			0.907381886396366	0.79644528099339	0.204778223258901			0.0379915222409812	0.0554563408231235	blue			brown	blue	PIK3CA
ABCA1	0.747676791264268	0.764806445181827	-0.888656	0.93496714804945		0.143146985307474	0.167420596089106	0.28873201027883	0.0822873941787066		greenyellow	green	green	brown		ABCA1
SELP	0.688844307452626					0.429673404118343					yellow					SELP
DUT	-0.954438	-0.87908	0.970417436241841	0.581371802844672		-0.12769	-0.0711171	-0.169898	0.0551121950824312		green	green	green	yellow		DUT
ACP1	0.934091547706056	-0.928518	0.979994335270064	-0.129108		-0.15814	-0.225667	-0.139525	-0.133069		purple	green	green	brown		ACP1
FKBP3	0.95017981474992	-0.9753	0.978891627426441			-0.12461	-0.0767143	-0.0959762			purple	green	green			FKBP3
HYAL1	0.738372713090756	0.723442793290769	0.729710634786299			0.227187171265614	-0.390713	-0.175458			green	black	purple			HYAL1
TMED10	-0.96597	-0.916372	0.959717785499311	0.79350677977082		-0.118167	-0.0219182	-0.211169	-0.039187		green	green	green	brown		TMED10
KMO	0.564929633737857		0.813915916931968			-0.355914		-0.037821			purple		turquoise			KMO
CA12	0.469018419140446	0.412076087465977	0.363280534360283			-0.279653	-0.205969	-0.195417			greenyellow	turquoise	yellow			CA12
CD38	0.480756913532404	0.626316560769426				0.256012357945209	0.38350516081585				green	green				CD38
PLK3	0.881263907435028	0.896118786886845	0.874042495813885			-0.0650893	0.0400025531637609	-0.0878836			purple	black	purple			PLK3
PRDM1	-0.579511	0.611400988507618			0.903502815997541	0.100499454504093	0.147378794965059			-0.0920714	green	black			blue	PRDM1
SENP6	0.964109445778269	0.776313260508571		0.994017999432723	0.967913366322967	0.0747896340123414	0.0964993807901035		0.109886390672126	0.0664320333288677	blue	green		brown	blue	SENP6
TRDMT1	0.860672349158955	0.833434023183487		0.09661864972671		0.288791421438106	0.174576530419345		0.280149314152191		blue	blue		brown		TRDMT1
GSTM4	0.699690422498377		0.781355428581594			0.0807215812390814		0.0751757309767796			purple		purple			GSTM4
LIMK2	0.871091455774771	0.87621974814551		0.818851488531015		0.286726567827184	0.430464787081043		0.313092270556364		green	blue		yellow		LIMK2
NLRP1	0.884605693179894	0.642696918221909	-0.93032	0.792992898364235	0.955938130535102	0.337466620223708	0.510089965411034	0.0693229602671366	0.102881015426227	0.0664556781202344	green	blue	green	brown	blue	NLRP1
SLC25A1	0.86573406791781	0.915391848540846	0.95771678550521			-0.158084	-0.248593	-0.176656			purple	black	purple			SLC25A1
ESRRG	0.630035609378358	0.96958365142365	0.776247454992254	0.34559713402812		0.319981813840929	0.292312221395604	0.405975191501886	0.479559713215291		yellow	blue	brown	brown		ESRRG
FBP1	0.807891051889872	-0.890914	0.851982760684884			0.044794062234193	-0.226319	-0.0297737			green	green	green			FBP1
MTOR	0.908836736995084	0.898427260382964	-0.973276	0.937525491541979		0.0965911091570161	0.174122497873365	0.110188778052216	0.104683580950119		green	green	green	brown		MTOR
ACVR1	0.837096094855594	0.821540362765527		0.93622778578847		0.351892439444628	0.424321570586853		0.269845678025098		blue	brown		yellow		ACVR1
DDIT3	0.467760605508787	0.840756924028985	0.895504197114007			-0.439868	-0.234996	-0.293248			purple	black	purple			DDIT3
ADHFE1	0.705169858012661	0.8759309778225		0.576340677495418		-0.0737108	0.07699740534477		-0.323917		green	brown		brown		ADHFE1
PARP4	0.887312229646555	0.88949277041523	-0.926634	0.961393860263949	0.963887958581691	0.14296798757758	0.112101485249642	-0.049434	0.211329628263935	-0.00903864	blue	green	green	yellow	blue	PARP4
CSF1R	0.781872485758706					-0.073697					purple					CSF1R
IKBKB	0.918562882972597	0.875365029661301		0.878960032282914	0.945428553374911	0.280823823030117	0.320719072889362		0.197932652379523	0.0110173049760526	green	green		brown	blue	IKBKB
GNPDA1	-0.900694		0.8591238630386			-0.124143		-0.207279			green		green			GNPDA1
CTSS	0.878249460855739	0.888224092962567	0.946802221226651			0.0327874690891074	0.110135901687997	-0.176115			green	black	green			CTSS
GSTM2	0.83341730122785	0.938278352124856	-0.919456	0.753212754276275		0.0523620649654574	0.110912899371776	0.138276508184927	-0.0152184		green	green	green	brown		GSTM2
POLE3	0.906345883469189	0.902482130147537	0.938582843357206			-0.216141	-0.269576	-0.325102			purple	black	purple			POLE3
NEK3	0.773036502925654			0.393686598416889		0.207955429015428			0.165098947253936		green			turquoise		NEK3
TRPC4	0.522586297948872		-0.728385	0.620475420377067		-0.158992		0.016702347277833	-0.0281809		blue		green	brown		TRPC4
YEATS4	-0.942116	-0.888118	0.93428891737415			-0.0990063	-0.154731	-0.183392			green	green	green			YEATS4
GRIN2B	0.713917233414508					0.484106195291466					yellow					GRIN2B
IL1RL2	0.376761287956126					-0.339395					purple					IL1RL2
HSPH1	0.624055391924532	0.583709687731294	0.674177756232301	0.472337216533903		-0.0217186	0.329924575302822	0.0754465333618057	0.17187432746066		purple	yellow	green	blue		HSPH1
SMOX	0.623262917698843	0.678735784334657				0.114623467366991	0.397916837610251				purple	yellow				SMOX
B4GALT1	0.798623015960477			0.818525459384617	0.591390597560886	0.0263976125585069			0.242850678826799	-0.221901	green			brown	blue	B4GALT1
PSMB10	0.876419451157737	0.832674995236475	0.891120535926706			-0.122704	0.105323285023987	-0.159733			purple	black	purple			PSMB10
GYS1	0.908321692002035		-0.867472	0.484522987481512		0.0622764449180652		0.201030701171382	-0.0867414		brown		green	turquoise		GYS1
ADORA2B	0.399329836799468					0.0805649355536597					purple					ADORA2B
PIK3C3	0.950282108818782	0.841272236927217		0.97706284345791	0.836269705465152	0.209194565640258	0.172869112095098		0.0568760891096131	0.11126819240334	blue	green		brown	blue	PIK3C3
CDH3	0.827065371796803		0.739373476894472			0.551003943339154		0.617155166012888			turquoise		greenyellow			CDH3
MAPKAPK3	0.896165035170491					-0.266883					purple					MAPKAPK3
CAMK1	0.732975068931664		0.913540796395101			-0.150267		-0.0756252			purple		purple			CAMK1
PRMT3	0.904626311808731	0.885580996941699	-0.956803	0.920383686320976		0.103324143736817	0.2162534551336	0.124469954113567	0.115804170242245		blue	brown	green	brown		PRMT3
AOX1	0.608622572033376		0.525303448551283	0.822019946447663		0.164499406089331		0.178696713668859	-0.0640492		greenyellow		brown	brown		AOX1
NEIL1	0.747989040345019	0.592197042459924		0.612432805361593		0.365024458024138	0.335597559152496		0.0914217072093371		brown	green		turquoise		NEIL1
NFATC1	0.683707481958361			0.518442676755389		0.442415182534412			0.264293368890049		yellow			yellow		NFATC1
NPR1	0.730964805500578	0.721107733093202	0.581282436270691			0.0609223190464886	-0.501339	-0.385984			brown	turquoise	purple			NPR1
UBAP2L	0.880760162324653			0.969384517138531		0.235379951054715			0.117271872692201		green			brown		UBAP2L
SULT1B1	0.65355676254686		-0.289761			0.0358947247678516		-0.508704			magenta		green			SULT1B1
NR1D1	0.0466538526611613	-0.467464	0.658561879710543			0.0467029981375608	-0.303626	-0.155332			green	green	purple			NR1D1
TRPV2	0.738688989012582					-0.111143					purple					TRPV2
CYSLTR1	0.537070689597646		0.459895931961886			0.181650485936765		0.166201006985429			purple		green			CYSLTR1
HSD17B14	0.774418426480972	0.704165746874731	0.559283766749206			-0.34786	-0.278722	-0.25078			purple	turquoise	purple			HSD17B14
CSF2RA	0.71855172678824					-0.453117					purple					CSF2RA
SENP1	0.869024961851457	0.891776109609575		0.545738012047329		0.0229134103245273	0.1929554298985		-0.0189432		blue	brown		brown		SENP1
UCK2	0.825885142399218			0.549084209837613		0.388308866546043			-0.182706		yellow			brown		UCK2
PIK3C2G	0.455328256202678	0.619435742865127				-0.122107	-0.0792867				yellow	brown				PIK3C2G
PDK2	0.622160384046247	-0.823191	0.890238743253127			0.276124257880762	-0.0266832	-0.0357627			purple	green	green			PDK2
CFH	0.621498622452931	0.804741778382547	0.679589542558281	0.961093401521874		0.574152631159725	0.737324827961818	0.549950836288503	0.221995327326484		yellow	pink	greenyellow	brown		CFH
YWHAB	0.707671655094798	-0.923303	0.979010175322821	0.732312333477536	0.843079337564074	-0.0452909	-0.0921458	-0.215482	0.00830127560517289	-0.0647783	green	green	purple	brown	blue	YWHAB
SCPEP1	0.831208343190078	0.682721409160798	0.957468375137399			0.160929816160197	0.271707806077157	-0.13719			green	black	green			SCPEP1
ACOX3	0.916890363899217	0.900980582663331		0.89634750484148		0.178169871703323	0.186846408456094		0.1002906982865		green	green		brown		ACOX3
FAHD1	0.826165706656807		0.925584966115767			-0.227352		-0.139417			purple		purple			FAHD1
NCAM1	0.778806415906419	0.586438221421694	0.715245666019506	0.276882037487835	0.577229969478617	0.177522088724528	0.10530314915631	0.0336256136258405	0.447669541500757	-0.188256	red	brown	brown	brown	blue	NCAM1
NAGPA	0.628088660023581					-0.0900537					purple					NAGPA
EYA3	0.898464355029848	0.876537800969101	0.963514657496896	0.945571540093603	0.837039927071685	0.118931001912342	0.0702570415200329	0.122079604631915	0.0122280265718284	-0.114681	blue	green	blue	brown	brown	EYA3
ALDH9A1	-0.935728	-0.950531	0.973497617513567			-0.0120422	-0.0306248	-0.186353			green	green	green			ALDH9A1
EGR1	0.0168898474251565	0.909302516733862	0.858324184939056	0.656471124193909		0.110450391988677	-0.0620004	0.0430514670619058	0.141964033614104		green	black	purple	brown		EGR1
CLEC7A	0.634212125028359	0.616614220652847				-0.300771	-0.300558				blue	black				CLEC7A
RASGRP1	0.116035270079528	0.375281383231605			0.960772868081693	0.0421738754252926	0.374279133613263			0.146755184508812	green	blue			blue	RASGRP1
GSTO1	0.883186458322925	0.968716354317106	0.974964815440353	0.506734273374543		0.0289086252980207	-0.0803305	-0.1926	-0.269716		green	black	green	blue		GSTO1
MCAM	0.663488826643108	0.269504738982973	0.739737005635435	0.461369732615147		0.519214143808725	0.208031642119023	0.161823678321267	-0.0364389		green	pink	purple	brown		MCAM
ABHD5	0.672096990555393			0.32967837200123		-0.297176			-0.357733		green			brown		ABHD5
OTUD3	0.830802677545549	0.642138625635622		0.512019454055327		0.135102179889192	-0.140123		0.0154666303758506		green	green		turquoise		OTUD3
PAK4	0.802635837731493			-0.12412		0.146748232424805			-0.128093		brown			brown		PAK4
CSNK2B	0.955424232488236	-0.806874	0.96336565922607	0.620265625426716		-0.127482	-0.0672461	-0.207586	-0.171287		purple	green	green	brown		CSNK2B
NTRK3	0.523874809632826		-0.0475146	0.676100511953905		0.301333747056291		0.304052955129556	0.033703272596749		turquoise		green	brown		NTRK3
MAP3K15	0.884933505368397	0.828133906237834	-0.927378			-0.0445207	-0.115369	-0.000146956			red	green	green			MAP3K15
PRKDC	0.887259148765263			0.982592133881384	0.926351905525129	0.0795705270854161			0.0585139982573631	-0.0131332	green			brown	blue	PRKDC
PCBP3	0.737466085566769	0.878696642846816	-0.920801	0.723020056761937		0.0590208581866253	0.0630544696055714	0.209626424169186	0.319173362040578		green	green	green	brown		PCBP3
GPRC5A	0.707557451365095		0.735656797335774	0.401089562489095		-0.186211		0.0968855260448871	-0.121448		greenyellow		greenyellow	blue		GPRC5A
POT1	0.901276421188466	0.879874548053424		0.879251707887369		0.177149659720578	0.117924123471406		0.180111246057521		blue	brown		yellow		POT1
EDNRA	0.741908088701781	0.8037301009231	0.806331047550595	0.948676517637459		0.125814307138704	0.163805216746512	0.283632425845497	0.0927922426152011		greenyellow	brown	magenta	brown		EDNRA
KCNJ2	0.433885181981783	0.194385245669404				0.161583473833915	0.331559208691178				purple	yellow				KCNJ2
CST3	0.623138096666705	0.969079947698584	0.979187930677566	0.453020054918807		-0.378133	-0.0998142	-0.15616	-0.140443		purple	black	purple	blue		CST3
USP4	0.871109298322357			0.909833010260687	0.92176185633337	0.127198401065202			0.0787892886981733	0.0434538029055102	green			brown	brown	USP4
ADH5	0.864726231841104	0.85220838714988	0.955023156441742	0.348610167710991		-0.323527	-0.392334	-0.270325	-0.149457		purple	black	green	blue		ADH5
C5	0.891641278134526		0.878018368109082			-0.0498529		0.0721473701913096			greenyellow		brown			C5
DIAPH1	0.751762166655705			0.833591732708858	0.979458569387488	0.115843309694269			0.155792509163622	0.0892890207974182	green			brown	blue	DIAPH1
SGK3	0.891962566581678	0.928574636839164	-0.931969	0.930379683382946	0.951499044925959	0.246145248834715	0.110283205797245	0.0390977101239033	0.202679371013152	0.0497176994154955	blue	brown	green	brown	blue	SGK3
ACSS2	0.808735897253412	0.887104515119514		0.720773308644553		-0.134437	-0.239354		-0.138101		green	red		yellow		ACSS2
MORF4L1	-0.950047	-0.787613	0.984745219173997	0.964265609007341	0.614852431055614	-0.197542	-0.0377252	-0.225096	-0.00843368	-0.197651	green	green	green	brown	blue	MORF4L1
DTYMK	-0.823197	-0.922215	0.913106499645377			-0.0365662	-0.0968342	-0.0087729			green	green	green			DTYMK
KDM5B	0.903908558795161			0.907593822819433		0.274591542611245			0.211687760610093		green			brown		KDM5B
AK4	0.643351044469508	0.521680911589913	0.601060139921976			0.369053718573823	0.277213926006523	0.376930606913006			turquoise	pink	greenyellow			AK4
CCT8	0.928214423925792	-0.872249	0.961342740911553	0.412149965799995		-0.24659	-0.2485	-0.224206	-0.244254		purple	green	green	blue		CCT8
ANPEP	0.483736485843065	0.837268079395265				-0.289543	0.385097886151288				purple	yellow				ANPEP
FERMT2	0.868046603671945			0.9780467961702		0.135234047711747			0.0487616109318111		brown			brown		FERMT2
ACSL4	0.797645636434683	0.829562659050158		0.839872538213811	0.830255369181352	-0.0559178	-0.110433		0.150302364387144	0.202572303046681	blue	red		brown	blue	ACSL4
MEST	0.442525111923734		0.761851167797607	0.292344872381974		-0.127885		-0.112556	-0.279395		purple		purple	blue		MEST
PLEKHA1	0.869234748408112			0.840895354820236		0.272858732141489			0.171618787362928		green			brown		PLEKHA1
CD74	-0.00736698	-0.955073	0.952582502904294	0.484532638435436		-0.165862	-0.00305251	-0.152285	0.150466557818702		green	green	green	blue		CD74
AKT1S1	0.909253227451771	-0.893652	0.879388880221851			-0.0894006	-0.0809406	-0.0209603			purple	green	purple			AKT1S1
NLRC4	-0.613513		0.646327422639101			-0.353502		-0.056139			green		blue			NLRC4
SLC16A1	0.679188043791567		0.682879399770264			0.088669387077354		-0.0934334			purple		purple			SLC16A1
MARK3	0.943853195722294	0.735020223376485		0.992178731762037	0.950729305489094	0.0995878460862632	0.0152503407304838		0.105133749503898	0.0360049702429177	green	green		brown	brown	MARK3
PTPRJ	0.919019179078371	0.911335098434329	-0.966836	0.815595331921855	0.975274785793006	-0.0243965	0.0856914458948846	0.130050513669245	0.0369711099601513	0.12481612535021	green	green	green	yellow	blue	PTPRJ
SDC1	0.297971043990406	0.831989242341987	0.87397323776506			0.117777158553457	0.148190288122157	0.188859769856303			purple	black	greenyellow			SDC1
PDK4	-0.194949	-0.564981	0.224453033965066	0.692602113895071		-0.143093	-0.139747	-0.278436	-0.0612662		green	green	green	yellow		PDK4
IL18	0.513987667202705					-0.471597					purple					IL18
F2R	0.640882375011609		0.882517884610005			0.333603005192264		-0.0119004			purple		purple			F2R
TRAF6	0.759594519174841			-0.107123		0.140062336467383			-0.00628298		green			brown		TRAF6
NCS1	0.626693623148086	0.834922700857084	0.551510795012182	0.386413764031917		0.290652214482489	0.487443093552868	0.607572548415055	0.27232859868345		black	pink	greenyellow	blue		NCS1
MUC1	0.793771305270796		0.889419721325636	0.511455980963036		-0.0719973		0.0655960917415574	-0.130019		pink		red	turquoise		MUC1
ERBB3	0.795082710873253		0.80471142491758			0.0653840435798612		0.296668863579689			pink		greenyellow			ERBB3
FOXO3	0.869215143339654			0.970966501954102	0.929744376436947	0.240108823019045			0.0361918219472611	-0.0609343	blue			brown	blue	FOXO3
CISD1	-0.882764	-0.922063	0.969295821505035			0.166771516331748	0.0597882963489311	-0.0399319			green	green	green			CISD1
HMGB1	-0.962576	-0.930238	0.980476273975214	0.981602055459056	0.760467721836234	-0.187931	-0.134482	-0.233286	0.0989397	-0.285257	green	green	green	brown	blue	HMGB1
MAPK14	0.90238021180846	0.876740672503778	-0.956376	0.960908689864245	0.939230467132694	0.140204910414899	0.0449910646079254	-0.0600699	0.0232103277697617	-0.0300127	green	green	green	brown	blue	MAPK14
AR	0.397504270009365	0.670973255221951		0.660881135694112		0.196453306733553	0.466582510056131		-0.0861785		blue	pink		brown		AR
CHM	0.891230665812423	0.78428123482541		0.94002935376222		0.120069311012267	0.228612883761299		0.0737156530409102		blue	green		brown		CHM
NOS1	0.73353992507654					0.172973840448998					brown					NOS1
NPC1	0.7312558474159	0.639137812608876	-0.92157	0.840568620827608	0.925338689208441	-0.310278	-0.266511	0.115319468355627	-0.106029	-0.1591	greenyellow	green	green	brown	blue	NPC1
CD274	0.0967045324669012	-0.264172	0.166332239077195			-0.138462	-0.236532	-0.0506314			green	green	green			CD274
HCK	0.525287039509847	0.447475901662889				-0.182512	-0.35238				brown	black				HCK
CNKSR1	0.659138408602464		0.75173251492406			-0.31878		0.0194585977201563			greenyellow		yellow			CNKSR1
MARK2	0.893830269343483		-0.907569	0.718114214659647	0.909191839406575	0.303487905866191		0.27033792426571	0.260195172319301	0.16157859849855	brown		green	brown	brown	MARK2
PPME1	0.838002038749129			0.838892627810848		0.0277084695105727			0.163679905968773		blue			brown		PPME1
PPIL1	0.778020173746044		0.897608619159054			0.000906659176859649		-0.0872422			purple		green			PPIL1
LAT	0.445481373661996					-0.177784					purple					LAT
PRSS8	0.319801054305071	0.84599338901982	0.715990646428817			-0.359874	-0.389268	-0.16222			purple	black	purple			PRSS8
EPHB2	0.646699210402622	0.664597359204369	0.768893282520377			0.300032517143329	0.349524866792285	0.375999218500787			yellow	blue	blue			EPHB2
ADAMTS1	0.530530927284351	0.712437679096615	0.715436981297529	0.893877801801082		0.357840686337094	-0.29564	-0.0978967	-0.0678264		yellow	black	purple	brown		ADAMTS1
TP53BP1	0.839238779485672	0.799031576354797		0.936891287790179		0.234025713859585	0.358172012972332		0.207791311822146		green	green		brown		TP53BP1
MAN1A1	0.829546887138162		0.843789848859865	0.932512971554098	0.933899870562219	0.10547563997556		0.092441670171061	0.0204346814974844	0.072240657102145	blue		blue	brown	blue	MAN1A1
MED23	0.858587153598549		-0.91401	0.829605508686193		0.0232548693856845		-0.00181551	-0.0060236		blue		green	brown		MED23
ATP2A3	0.784131498283692	0.749185873637464		0.733976950457404	0.952063330273034	0.178262477732101	0.454053453054474		0.0179342555206216	0.0689054099274383	brown	blue		turquoise	brown	ATP2A3
COG3	0.805132808392688			0.948276509261297		0.128407619519431			0.0921669172060719		green			brown		COG3
HLA-DQA1	0.542573071652362	0.851072021011973	0.925617263349135			0.0965301318951176	0.178811215452691	0.020576822530041			blue	black	green			HLA-DQA1
ITK	0.300223091928611	0.224935331864698	0.418894772757944		0.966054928355001	-0.0239748	-0.048641	-0.13398		0.0800929806527304	purple	green	purple		blue	ITK
TMX1	-0.893608	-0.883132	0.946467872847394			-0.169011	-0.0841045	-0.189782			green	green	green			TMX1
DPP4	0.363106026873925	0.713997646035951				-0.260503	-0.148266				blue	turquoise				DPP4
RUNX1	0.783454462829946	0.810640437244121	-0.939961	0.863839760547189	0.968115494199317	0.229570613311154	0.329753770264137	0.107062511077015	0.322954481273078	0.179405920369143	yellow	blue	green	brown	blue	RUNX1
NDRG1	0.714915886797006	-0.124886		0.86136055766831		0.236864670579653	-0.271784		0.0224812287240442		yellow	green		brown		NDRG1
COPS5	-0.938796	-0.834975	0.966128348249411			-0.116265	-0.0187357	-0.152323			green	green	purple			COPS5
KLF10	0.783497078507165	0.849415726679141	0.861397729732041			-0.0905013	-0.230775	-0.263714			purple	black	purple			KLF10
MAP2K6	0.314726485124236	0.487486025853178				0.379490054684111	0.414983771635384				yellow	brown				MAP2K6
RPS6KA3	0.895876427977656			0.961018189161668	0.974604217434856	0.126906152487607			0.0820424342857343	0.100680694495977	blue			brown	blue	RPS6KA3
TET1	0.836235812006494	0.71723421322185	0.83371839512614	0.588275437586147		0.329468997992605	0.500706158007392	0.519255120880137	0.419049548590314		yellow	blue	brown	yellow		TET1
CUL1	0.899498647861365			0.98420347594732	0.912303957788037	0.186297205355852			0.0421160887034588	0.13993409108013	green			brown	blue	CUL1
KMT5B	0.806818764658397			0.946553891015964	0.823782802810633	0.298193481378444			0.219605838197054	-0.0989471	green			brown	blue	KMT5B
HSPD1	0.735044673437572		0.867285364257331	0.669268260957852		-0.13113		-0.123083	-0.0123848		purple		green	brown		HSPD1
PITPNM1	0.556883657496181		0.551155869185339			0.158882176505118		0.128319053072011			purple		purple			PITPNM1
OXR1	0.818164003007778	0.776530429691435		0.924167419362473	0.85811203657754	0.204925277957377	0.280897535215574		0.190660496939636	-0.163956	blue	blue		brown	blue	OXR1
MCOLN3	0.37720915353557	0.338634833698579	0.516846427364573	0.488339001760294		-0.250925	0.0384489573104616	0.51098897788831	-0.307067		greenyellow	green	brown	blue		MCOLN3
PRMT5	0.733217097399086		0.907333586676129			-0.00694212		-0.0156499			purple		purple			PRMT5
NAPRT	0.827602852004118	0.76502936519163	0.806928774961576			-0.0623252	-0.0179837	-0.274622			purple	black	purple			NAPRT
PLCG2	0.780771562703351	0.464519271104648		0.676531590099518	0.848077386591111	0.35155548880391	0.17220802323039		-0.101314	-0.157258	green	green		brown	brown	PLCG2
IRAK1	-0.757426					-0.113994					green					IRAK1
GPR173	0.856404009195609	0.791164756515635	0.889153322466952	0.554882908015227		0.365600139043958	0.310363487035759	0.273005495148558	0.177871412748002		green	blue	brown	yellow		GPR173
AGPAT1	0.774884379648526	-0.89428	0.91045925838431			0.109987824730299	0.0387920964308256	-0.0959801			purple	green	purple			AGPAT1
TAF3	0.836004375515628	0.828979215908819		0.976574130263611	0.933934474574434	0.25025773758521	0.161378191762732		0.0642503302696614	0.0595884260509818	green	brown		brown	blue	TAF3
ST3GAL1	0.817121429647016	0.630333576136691		0.983032754593595	0.948644555492338	0.17857171533736	0.204668238785872		0.134034923495046	-0.000727116	green	green		brown	blue	ST3GAL1
IGFBP4	-0.191774	-0.836039	0.875993679494385	0.736552455181052		0.641066112261297	0.158044907608209	0.156761337098353	0.39268086184724		green	green	purple	brown		IGFBP4
CA3	0.481903807855113	0.902306311355742	0.292304698009203			-0.0831961	0.184631941782383	-0.0543543			blue	green	brown			CA3
HRAS	0.749155430153101	0.816480974101239	0.883854206029638			0.00316393007680899	0.057242761918515	-0.0408601			purple	black	purple			HRAS
IL33	0.703092263496969	0.732384618819319	0.710287030969905	0.398432948724596		0.523510640140671	0.541019683737575	0.144788457800069	0.139418078976135		yellow	pink	purple	brown		IL33
ME1	0.735742996751748	0.769676509479444	0.850630652952577	0.679622201594018		-0.204202	0.021243554509993	-0.0302189	0.100608351641164		greenyellow	green	blue	brown		ME1
PIK3CB	0.882336597922101	0.899547883609817	0.962476459186593	0.807130343535182	0.891417781639082	0.0238069820429782	0.168333286641493	-0.0229692	0.267070589157607	0.0759038777264731	blue	brown	blue	yellow	blue	PIK3CB
CASP10	0.817070063954959					0.185913902814711					green					CASP10
GPX4	-0.158259	0.983260031762446	0.979691788372799	0.671783270027885		-0.458769	-0.0707861	-0.193051	-0.200075		green	black	green	turquoise		GPX4
TNK2	0.782209481065401		-0.928703	0.626139274842902		0.20686960618039		0.221696181164931	0.135104467762588		brown		green	turquoise		TNK2
SLC19A1	0.545101573099812	0.773199146293138				-0.221656	0.0404836436264423				brown	brown				SLC19A1
MAPK12	0.634431523097527					0.347673361065108					brown					MAPK12
PDK3	0.766330013393425			0.481821568264357		0.0538225675898133			0.299419400289786		green			yellow		PDK3
EDNRB	0.0936972742587787	0.659204552102897	0.686951057924376			-0.0476359	-0.514913	-0.383583			green	black	purple			EDNRB
TXK	0.408950180405278	0.792656705597808	0.746127126228721		0.884197021807135	-0.510706	-0.183538	-0.285242		-0.242565	greenyellow	brown	blue		blue	TXK
ULK1	0.812717277517685			0.674682647422523		0.0927759998438108			0.222279806547991		brown			brown		ULK1
ESR1	0.675489307049786	0.876676824649095	-0.96742	0.803248670497614		-0.0161488	0.254776283925528	0.187103254847986	0.107340405094973		magenta	green	green	brown		ESR1
PIP5K1A	0.864318190480553			0.963098803248318		0.137733131049726			0.236052283349961		green			brown		PIP5K1A
ALDH1A2	0.46749872034372	0.705823160027548	0.79975856024052	0.181786153321756		0.084384102208843	0.0197582521558835	0.10674210096037	0.0205411238149116		blue	brown	blue	brown		ALDH1A2
SHARPIN	0.86925706038879	-0.764475	0.93703399683775			-0.185292	-0.18711	-0.150342			purple	green	purple			SHARPIN
PNPLA2	0.233907043545394			0.770425016165145		0.147618605838446			-0.163771		purple			turquoise		PNPLA2
LCP1	0.67405310401652				0.983374156067953	-0.225388				0.0557861686590971	green				blue	LCP1
SMG1	0.95583442040248	0.781138088512673	-0.976245	0.946802419120255	0.983132435729199	0.138588048423466	0.119802866644689	0.0891533883869462	0.105437510575708	0.0705966082269211	green	green	green	yellow	brown	SMG1
CDKN1A	0.110665718689787	0.888671502748588	0.933386626991502	0.717953754677609		-0.00498136	0.0826479623685318	-0.132458	0.0209101494975452		green	black	green	blue		CDKN1A
NISCH	0.823281832582051			0.849618443966863		0.083941878602396			0.230308838174427		brown			brown		NISCH
ABHD11	0.432352112045377					0.180954230818355					purple					ABHD11
PTP4A3	0.683273054472705	0.47917562197479	0.472326022400501	0.56698978563189		0.260656057313648	0.104272990488344	0.246059952205157	-0.00102014		brown	black	purple	turquoise		PTP4A3
XPO1	0.733660211165867			0.946066521246755	0.927132678993758	0.221965660639459			0.167168205030875	0.141924987914454	brown			yellow	blue	XPO1
PREP	0.884356100818043			0.921177086712234	0.906309528205984	0.0951238726384495			-0.0368196	-0.0575296	green			brown	blue	PREP
PLA2G15	0.842851637636951					-0.297706					purple					PLA2G15
PHIP	0.918512780671453	0.720862860166073		0.988612413831724	0.957851292743008	0.222726793953047	0.275006161315364		0.109807772598534	0.0850159631927318	blue	blue		brown	brown	PHIP
PDGFRB	0.713772341483583	0.343937788630451	0.790428606453782	0.962044824562368		0.109174726696439	0.0584910635248297	0.210762265295038	0.0511099761785509		greenyellow	green	magenta	brown		PDGFRB
BPTF	0.918169852249775			0.967579462933171	0.965330739402376	0.180226221589138			0.092921014111224	0.0259014370406518	green			brown	brown	BPTF
ADRB2	-0.221552	0.55687666175205	0.789275716194547			-0.517325	-0.508711	-0.246481			green	black	green			ADRB2
CERS4	0.624383775078804		0.8123715150085	0.449274568765503		0.349931103558593		0.311276262542455	0.358532976496108		brown		greenyellow	brown		CERS4
PPP4C	0.943306740220538	-0.89655	0.96864120993294	0.428066314025343		-0.133784	-0.0872533	-0.222521	-0.172488		purple	green	purple	turquoise		PPP4C
PIP4K2B	0.78991117460129			0.646826786150541		0.116924514396458			0.15654150101876		green			turquoise		PIP4K2B
UBR4	0.909613386790297	0.877309486955977		0.983431700090631	0.960698878837261	0.117158568851141	0.116276115967413		0.0769954109838712	-0.0120846	green	green		brown	blue	UBR4
BCL7B	0.953907168933558	-0.903201	0.963026436752367			-0.144369	-0.0506763	-0.139987			purple	green	green			BCL7B
PRRX1	0.542030717176117		0.838170632499508	0.93614748150867		0.185389028036786		0.324039088136504	0.233714382522877		yellow		magenta	brown		PRRX1
GSDMD	0.691263881330276	0.839542279196952	0.886370398507476	0.864504620880881		0.0507913331077671	-0.102083	-0.0904498	0.0193908776124131		purple	black	purple	turquoise		GSDMD
PAK3	0.837059444691159	0.70153165383404	0.797714949847235	0.701127201829439		0.365174396346252	0.362229794942474	0.561451966994508	0.349658783422523		yellow	green	brown	brown		PAK3
LPAR2	0.568903731797748	0.62397350709243				0.00136229684871694	0.0385151131340609				purple	yellow				LPAR2
ITGAL	-0.226018	0.563580574577034	0.802742898363561		0.946115782384881	-0.145414	0.0791350912251944	-0.194016		0.107891320544063	green	blue	turquoise		brown	ITGAL
ENTPD4	0.841720321512744			0.920400626920424	0.87668834176857	0.165127206836745			0.0397024343918069	0.131533229527832	green			brown	blue	ENTPD4
CPT1B	0.69127113890241	0.860022104118523	-0.883016			0.053100451122909	0.0770070052113356	-0.0560275			brown	green	green			CPT1B
SLC39A6	0.841663119858825	0.894918131547759	0.927483464404295			0.0455714856069953	0.140960752316023	-0.140081			purple	black	green			SLC39A6
AOC3	-0.700098		0.771822276951725	0.459937713620099		-0.298324		-0.389009	-0.365457		green		purple	blue		AOC3
FGFR1	0.768882630106946			0.919823960111341		0.255444159960475			0.0998413118272337		brown			brown		FGFR1
HNRNPF	0.918652346214997	-0.841558	0.973116668887337	0.716358285211535	0.478465541837665	-0.0479962	-0.0246835	-0.154847	0.166855987272088	-0.21728	purple	green	green	brown	blue	HNRNPF
RSPO3	-0.0703487		0.448554123467817			0.183681522527295		-0.0151269			green		purple			RSPO3
IKZF3	-0.0592385		0.265412906958342		0.977076806199143	0.157503299432168		-0.131457		0.0926511719872399	green		purple		blue	IKZF3
TAB1	0.755144109537176			0.54753271020895		0.227176892235005			0.17073694951446		green			turquoise		TAB1
RBBP9	-0.426086		0.77780619605018			-0.0094279		0.132142510922953			green		green			RBBP9
DDR2	0.727761359633764	0.477472863174762	0.794037051482902	0.968630004036428		0.123284437315256	-0.0193302	0.233400930504785	0.0452633750980602		greenyellow	green	magenta	brown		DDR2
GPAM	0.723894911997648	0.763922740410457	0.799689765404507			-0.125239	-0.222695	-0.0797933			green	red	brown			GPAM
MAP1LC3B	0.641284822155841	-0.941333	0.962255977301652			0.085727153663102	-0.164904	-0.217364			yellow	green	green			MAP1LC3B
CBX3	0.966529513778924	0.97065191749171	0.967610866263005	0.498632756030646		-0.106617	-0.211945	-0.223478	0.1992287983986		purple	black	green	yellow		CBX3
UGCG	0.628964701035573	0.623644043921417		0.716324699898586		0.603463000143354	0.536614035099986		0.356162232411889		yellow	pink		brown		UGCG
UBXN11	0.802836140177794	0.781833013102099				-0.105671	0.331296424900869				purple	blue				UBXN11
PPARD	0.78582338976627	0.842504136065835	-0.939665	0.855121680760808		0.0996532498270305	0.12905460028771	0.166333579119987	0.193759794288494		green	green	green	brown		PPARD
UCK1	0.688593984346375	0.873953606396877	0.911920789523195			0.0411691756336751	-0.0420162	-0.0584093			purple	black	purple			UCK1
TAP1	0.715302912351539	0.734121381903855	0.926068682230211			0.0884498985949484	0.0818987408017954	0.0275385289083299			purple	black	purple			TAP1
PPIP5K2	0.817474982421004			0.930365053391776	0.847239607168737	0.0742096210351898			0.131597809952647	0.0209239836677688	blue			brown	blue	PPIP5K2
GNAI1	0.754673203574185			0.880087919552245		0.399400486791101			0.0550268284010035		yellow			brown		GNAI1
DUSP6	0.407273054872566	0.789120810840403	0.730484059846279	0.476451764174649		0.24388443198731	-0.100251	0.0774731229910071	-0.2607		purple	black	purple	blue		DUSP6
CR1	0.0884759256463694		0.864566918525172			0.00120455026092144		0.116472150124443			green		blue			CR1
SPIN3	0.924639890281803	0.908398471418207	-0.958937	-0.210746		0.0880755046663344	0.0714555721453403	0.177133669832637	-0.123596		green	green	green	brown		SPIN3
BRWD1	0.952253792319279	0.819787849184201		0.972062349079858	0.963930913151393	0.15331862781897	0.206315749418345		0.128255847770155	-0.0335328	green	green		yellow	blue	BRWD1
PRMT1	0.878689180611616	0.920081145468134	0.93353191986596	0.585241762303431		-0.0156854	-0.0608603	-0.0286027	0.00460455179602993		purple	black	green	turquoise		PRMT1
TRIM33	0.876208053212113			0.971128703140808	0.968359987366703	0.192680345447916			0.103976380466933	-0.0119887	blue			brown	blue	TRIM33
THRA	0.306861125924161			0.711083306486197		0.0819042080656455			-0.154529		brown			turquoise		THRA
GSPT1	0.822379866173127			0.906931948999949		-0.118023			0.078274263414827		green			brown		GSPT1
RIPK2	0.820896853866548			0.505532461136456		-0.125471			0.0547512228410831		purple			blue		RIPK2
DOT1L	0.816981039290364	0.792950116579441	-0.864139	0.771279872658294		-0.0869576	-0.103755	0.042816037762847	0.0408782660122367		green	green	green	brown		DOT1L
IP6K1	0.851382171244761	0.829342903402415		0.928665363608442		0.22118921756238	0.0707514180384427		0.0583436678283189		green	green		brown		IP6K1
SPPL2B	0.71772062544824	0.704797681236127		0.831045749057417		0.220761220351135	0.366277768725398		0.105390634021563		brown	green		turquoise		SPPL2B
FGFR3	0.394613344572845	0.492155152682808	0.767236468966776			0.33795107478372	0.435460884976367	0.377357748747745			brown	pink	greenyellow			FGFR3
CUL5	0.90177780945888			0.916084240441801	0.851809076610807	0.0590913411140023			0.121180747550751	-0.0636859	blue			brown	blue	CUL5
CD36	0.347682735149126	0.838657670959309		0.170602405748234		-0.18137	-0.366794		-0.419418		brown	turquoise		brown		CD36
PTGES3	0.922379051432702		0.954374470838471	0.7341123326165	0.647854990838524	-0.0772374		-0.0609023	0.270223886630208	0.121278343889257	purple		green	brown	blue	PTGES3
ELOVL6	0.749042328885595	0.586362445993404	0.435068095950136	-0.102309		0.0131382593198306	-0.483563	-0.246708	-0.4447		blue	red	brown	brown		ELOVL6
PPARA	0.732761838687558			0.817006901130092		0.176515604775451			-0.01589		green			brown		PPARA
IL1RAP	0.601379163996435	0.733453601493952	0.73434026439379	0.767448551422154		-0.0109628	0.182500342613048	-0.0957699	0.0832226630461923		blue	brown	blue	brown		IL1RAP
SND1	0.891528779950157			0.9634766461044	0.977113062838794	-0.0332443			0.0204078065868205	0.00279523731709776	green			brown	blue	SND1
TM7SF2	0.370978816061364	-0.849071	0.729273594502727			-0.300667	-0.248657	-0.181509			purple	green	purple			TM7SF2
FKBP1A	0.848387889449174	-0.949348	0.978203571096998	0.621134984542768		-0.0374981	-0.0613905	-0.168898	-0.0676146		purple	green	green	yellow		FKBP1A
AKR1C1	0.694153939506062	0.712738400783402	0.625352734778308			0.123724171633931	0.12709635046679	-0.0516678			black	black	greenyellow			AKR1C1
CERS2	0.931893559273435	0.954607632191567	0.972884151509163			-0.218398	-0.298205	-0.149329			purple	black	green			CERS2
ZNF280D	0.938232862221467	0.840735504858293		0.957443533739686		0.217435343271448	0.286138189640738		0.187477057299089		blue	brown		brown		ZNF280D
ACVRL1	0.459829042631656		0.900874534498965			-0.119254		-0.276574			brown		purple			ACVRL1
DNMT3A	0.668597002510631	0.83963863222267	0.896117278156154	0.812065656294913		0.167174646897204	0.384137451615069	0.202351991947836	0.310186958716984		green	green	blue	brown		DNMT3A
PDGFA	0.608190277889446					0.133192115421683					brown					PDGFA
IMPDH1	0.794961629611888					-0.162981					purple					IMPDH1
HSPA4L	0.579844372774213	0.712304850143275	0.807374370401978			0.537424484108527	0.549871315008033	0.239165943295302			yellow	blue	greenyellow			HSPA4L
CNR1	0.539810958689818	0.755217118522272				0.0122602265433029	-0.107279				brown	red				CNR1
ULK3	0.103917405060556					-0.127857					green					ULK3
HAGH	0.867821754008737		0.916758702262035	0.360722597149495		-0.221011		-0.23859	0.126632581237391		purple		purple	turquoise		HAGH
PKM	0.664363592474284	0.883724635885102	0.977241256410816	0.450655339173446		-0.0732426	0.168382335482798	-0.117209	0.249173496345525		green	black	green	blue		PKM
ICAM1	0.241679106769767	0.573192212863672	0.879238325182153	0.731533515199463		-0.0955164	-0.196602	-0.0256519	-0.0285994		purple	black	purple	blue		ICAM1
DDR1	0.373569713132974		0.740367370356671			0.107748		0.18318062721605			purple		purple			DDR1
ST14	0.52219151023403					0.0615848230877976					purple					ST14
CYC1	0.298572140556328	0.949429744419201	0.967851220219617			-0.211399	-0.185399	-0.181478			brown	black	purple			CYC1
HUWE1	0.94393777802081	0.840400733656345		0.99269287555871	0.959704490331038	0.0602022639336729	0.0795370789979059		0.0619439661080936	0.0714991006597172	magenta	green		brown	brown	HUWE1
PDCD1LG2	0.144779520165845					0.306928943338467					green					PDCD1LG2
CRY1	0.713605489629324	0.53316563294951		0.771125093010808		-0.0650629	-0.0528043		-0.0446981		blue	green		brown		CRY1
EIF5A	0.406364430057723	0.981515580668814	0.97152294474854			-0.467856	-0.197854	-0.185305			purple	black	green			EIF5A
MAOB	0.217848932770651	0.803389556506365	0.364391314558918	0.767734673878304		0.0192474766433137	0.418041322861809	0.0317856984034082	0.133642379586757		purple	pink	purple	brown		MAOB
S1PR1	0.497846730115444		0.795723355075679			0.218647478559013		-0.110126			green		green			S1PR1
KMT2B	0.721964624594617			0.870478813065746		-0.00672412			-0.114002		brown			turquoise		KMT2B
OPA1	0.91919057914083			0.949206848936277	0.833081508776678	0.138366803934131			0.0550627234458265	-0.133982	blue			brown	blue	OPA1
STK24	0.898915609560681			0.974979912781536	0.927611211974343	0.253275368333788			0.167579624828861	0.174433074675783	blue			brown	blue	STK24
PRKD3	0.813767716875981			0.951125197667147		0.255589134960767			0.141459392280541		blue			brown		PRKD3
KMT2A	0.959371218665775			0.984067880459584	0.969364040868672	0.216170316120354			0.126954059862235	0.158759568462842	green			brown	blue	KMT2A
CSF1	0.0856495621540968	0.338053770188324	0.324433220622726	0.49208169817864		0.288890787107833	0.309492238451142	0.460442503212635	0.128671316180496		green	yellow	green	blue		CSF1
PHF19	0.664621710446741					-0.021371					purple					PHF19
MAPK13	0.738929416102972	0.879616213519419				-0.319928	-0.296732				purple	black				MAPK13
TOPBP1	0.783225311063488			0.647105963881479		0.0863055367099358			-0.0332496		green			brown		TOPBP1
KPNA2	0.891938908257746		0.9273198766343			-0.190631		-0.191328			purple		green			KPNA2
NQO2	-0.84733		0.786597088228185	0.609978222184397		-0.320513		-0.445077	-0.117509		green		purple	turquoise		NQO2
CXCR4	-0.0773738	0.869970123500449	0.928635881516451		0.855349872412055	-0.114015	-0.0486897	-0.206103		-0.0891727	green	black	purple		blue	CXCR4
XBP1	0.870517370235775	-0.907139	0.937960874712584	0.356066535231001		0.0128820062435143	0.120674443564446	-0.155157	-0.118832		purple	green	green	brown		XBP1
KDM6B	0.712662627137261	0.773879057322357	0.852309763722589	0.727153010531062		-1.41093e-05	-0.00536932	-0.0915235	-0.0378638		purple	black	purple	blue		KDM6B
SPHK1	0.347528309436681		0.817819545253675			0.0956527727299166		-0.125815			purple		purple			SPHK1
DHX32	0.782850099438496			0.747084958194143		0.333540134205858			0.2640679034445		green			brown		DHX32
TLK1	0.875997950942948	0.920844951541481		0.990559985167411	0.980505759782276	0.290783410845395	0.258042127112782		0.110720068106805	0.13039686797809	blue	brown		brown	blue	TLK1
C1S	0.370854266923166		0.8228157117625	0.976034440954581		0.269064247604846		0.107144058640705	0.0912295395861054		purple		purple	brown		C1S
TNKS2	0.831335661834714	0.781086085648163		0.975644042561631	0.868154620233975	0.140395764454603	0.177019523465189		0.0716553880602787	-0.0335008	green	brown		brown	blue	TNKS2
NDUFA13	0.857989583229702	-0.960494	0.951242860107489	0.494477603842728		-0.249373	-0.100541	-0.272982	0.119950712593501		purple	green	purple	turquoise		NDUFA13
HMGCR	0.356179733597002					-0.480068					greenyellow					HMGCR
SULT1A1	0.221273924784175					-0.446062					purple					SULT1A1
MCOLN1	0.671383696538312			0.522415118118264		-0.340253			-0.259934		purple			turquoise		MCOLN1
EIF2AK3	0.826953744857072			0.850340411801355		0.0641579005481229			0.0552849013555932		green			brown		EIF2AK3
RPS6KA5	0.781213077784722	0.760917324814951		0.626532367767711	0.937008367691963	0.0853575290534545	0.296404413464014		0.349449752267288	0.0217651494994355	blue	blue		brown	blue	RPS6KA5
DNAJA2	0.935148153951226	-0.857716	0.953861538746941			-0.185243	-0.0548085	-0.217454			purple	green	purple			DNAJA2
SLC1A5	0.748858854510317	0.912695677449005	0.858895085155947			-0.180659	-0.214887	-0.270809			purple	black	purple			SLC1A5
PHF13	0.686711905575647		0.802509499144066			0.0217729110489989		-0.0452863			purple		purple			PHF13
BCL3	0.0207624253076205	0.544961559278165		0.550393990840489		0.215013992287378	0.18870622782054		0.106989611419236		green	black		blue		BCL3
GLO1	-0.833637	-0.921616	0.962977738527539	-0.0984328		-0.195215	-0.252343	-0.224816	-0.185922		green	green	green	brown		GLO1
SPTLC1	0.865855115723923	0.955661144865934		0.881999178978446		0.0735860249063937	0.137268884600101		0.217667724096385		blue	brown		brown		SPTLC1
MAN2B1	0.759999200578504	0.743085264489253	-0.888701			-0.1087	0.0604996602823239	-0.00967587			green	green	green			MAN2B1
ADAM33	0.197946283842031			0.659256435668223		0.0274777076865073			-0.109286		green			yellow		ADAM33
TNKS1BP1	0.866985322056127			0.903597781363803		0.366008462966326			-0.00219674		brown			brown		TNKS1BP1
IL6R	0.431992031812836			0.613469400680794		-0.324667			-0.128571		brown			blue		IL6R
TNS3	0.811100280872162	0.889152514269286	-0.959161	0.942742967470104		-0.0439382	0.210476628413444	0.145718521176034	-0.00844091		greenyellow	green	green	brown		TNS3
SLC22A4	0.501610706824103	0.890625293512998				0.222652672329602	0.411442827628044				turquoise	pink				SLC22A4
CYB5R3	0.907967893462867	-0.877474	0.956136334137403	0.465340149133057		-0.0183909	-0.106388	-0.1496	0.0308697739478294		purple	green	green	brown		CYB5R3
FAAH	0.605203772501272					-0.0258329					brown					FAAH
PABPC4	0.922656234315205		0.892964072498868	0.574459549958262		-0.160292		-0.175695	-0.167962		purple		purple	brown		PABPC4
ARNT	0.828191159765434	0.85632321421345		0.958966480879743		0.115842457993791	0.109138172531758		0.108629796787216		blue	green		brown		ARNT
NOD2	0.390642151126028		-0.849927			-0.0659541		-0.0558373			purple		green			NOD2
EHD1	0.79306984475456	0.74136840597564	0.847461894740761	0.40370125182194		-0.177192	-0.116381	-0.192116	-0.0772268		purple	black	purple	turquoise		EHD1
QDPR	0.773935213302269	0.870284724982375	0.885800463567601			-0.183295	-0.298778	-0.215531			purple	black	green			QDPR
NT5C	0.824645990173015			0.571784707596192		-0.217242			-0.140718		purple			turquoise		NT5C
NIPSNAP3A	0.733321701359626		0.851200176984898			-0.251457		-0.224142			purple		green			NIPSNAP3A
CAPZA1	0.333844211768373			0.911160762961936	0.929565504882905	0.0360630870753352			0.0254285879935951	-0.00412927	purple			brown	blue	CAPZA1
CNOT6	0.80986979350628			0.785258970332603		0.33936591456205			0.265238668174873		green			brown		CNOT6
JAK1	0.86688378589805			0.982294454337197	0.966321675220337	0.0626506952158866			0.115575118229234	0.0471697986046906	green			brown	brown	JAK1
PSMG1	-0.866264	-0.92753	0.952921097820666			-0.133157	-0.239295	-0.268528			green	green	green			PSMG1
NR1H2	0.882192437653859		0.945329806765355			-0.275735		-0.310216			purple		purple			NR1H2
IRAK4	0.724594600388947			0.728535391204136	0.94932341893496	0.254739365307351			0.220232994480162	0.0550951415901092	green			brown	blue	IRAK4
CSNK1G3	0.927375379456359			0.976838168345994	0.861669924092517	0.281808833356166			0.1617937401643	0.0619009726807644	green			brown	blue	CSNK1G3
NR1D2	0.451066604546362			0.244739863188301		0.208128856244619			0.149669602277383		green			brown		NR1D2
ATXN3	0.814659283594325			0.948498069562107		0.371438902340475			0.0995788696138801		blue			brown		ATXN3
NUDT4	0.733414385365918	0.753562474688637	0.931187164666239	0.699081751140755		0.237893042318071	0.183941934993002	-0.0607315	0.21401791913791		purple	black	green	brown		NUDT4
PRKAA2	0.719622911215815	0.835805547806375	0.760387083656092			0.287957567394735	0.710155707801668	0.374053458891314			yellow	pink	greenyellow			PRKAA2
NR1H3	0.616141453740921		0.166510058235202			0.0580451534052685		0.461132364573568			purple		blue			NR1H3
SARM1	0.682269163506674					0.155554199587839					green					SARM1
PON3	0.707523193062891	0.592584323128353	0.73501775541153			-0.0328627	-0.207497	-0.0440805			green	black	yellow			PON3
EGLN1	0.728135261338777			0.578418499210873		0.35987560834182			-0.00367544		yellow			blue		EGLN1
BCL2	0.679694578243832	0.835357615361215	-0.918665	0.952213022766204	0.95038951771542	0.0077528257784438	0.391418731867323	0.219306108615188	0.0523052626729489	0.0695254540412602	blue	green	green	brown	brown	BCL2
PMP22	-0.789708	0.508180966179908	0.852018234430027	0.941140989450271		-0.1276	0.0218225894707968	0.0366238582982657	-0.00376934		green	black	green	brown		PMP22
CDK11B	0.563406558273743			0.70870576538649		-0.10537			-0.220512		green			turquoise		CDK11B
SERPINH1	0.655441864621139	0.803373168951578	0.873961112466119	0.346641789980048		0.285085478785249	-0.120407	0.0251117471599436	0.0772362007203869		purple	black	purple	blue		SERPINH1
NR4A1	-0.0554755	0.66222838768445	0.705317966557475	0.679877755943262		0.119650606846647	0.00407362914092782	-0.0528286	0.115464770406447		green	black	purple	yellow		NR4A1
PTDSS1	0.864758037556604			0.721881168668241	0.838946438341502	0.0264967907654976			0.0300123096809324	-0.0919386	red			brown	brown	PTDSS1
KAT5	0.858045689212547		0.900468901013626			-0.221262		-0.250446			purple		purple			KAT5
TDRD3	0.817448420576255	0.963422876233506	0.67483454853344	0.955788382995105	0.879684081971583	0.407026024180358	0.240884465627362	0.428832105483731	0.139034024900581	0.0474751256600091	blue	brown	brown	brown	blue	TDRD3
ELOVL1	0.833784790540374	0.882643114598947	0.959998499386265			-0.0190928	-0.331935	-0.123685			purple	black	purple			ELOVL1
TEAD2	0.649237865949252		0.819996673130914			0.514158027387965		0.104048391996208			brown		purple			TEAD2
ITGA4	0.383972666131584	0.672200852931647	0.753362318050001		0.983726196188153	-0.00574326	0.300019923603854	-0.0503859		0.0985679036563651	brown	green	blue		blue	ITGA4
DNM1L	0.784733050265111			0.969489593424197		0.142301034167894			0.0700203591134605		blue			brown		DNM1L
PRKAG2	0.896918094137865	0.785300819851511	-0.931545	0.933700377304855	0.93727431217269	0.18783622108497	0.1486657829752	-0.0114443	-0.00178692	0.0604787264889969	blue	brown	green	brown	blue	PRKAG2
GPRC5C	0.447175934582548		0.747817676460894			0.0336717315330372		0.133039175239096			purple		greenyellow			GPRC5C
ACTB	0.328267144059817	0.959506756315419	0.981270861058782	0.921282552793053	0.740727447985829	-0.368518	-0.171084	-0.137201	-0.00399816	0.0061613407446915	brown	black	purple	brown	blue	ACTB
HIBCH	0.87652120273861			0.906624309684134	0.902399472788229	0.289348745552017			0.227856755850384	0.0741200656925017	green			brown	brown	HIBCH
BRD2	0.703691371847523			0.850240264447353	0.88354519941221	0.0273365640116015			0.0193213285221988	-0.0964697	brown			brown	brown	BRD2
GALNT1	0.806677574778602			0.952863504135416		0.235568336290322			0.19956198144914		blue			brown		GALNT1
SLC19A2	-0.132559			0.661567863799068		-0.345971			-0.0384215		green			brown		SLC19A2
TDP2	-0.81207					-0.270907					green					TDP2
RPS6KB2	0.841638573937925	0.851022512136599	0.91139214147716			-0.0938615	-0.0494804	-0.14024			purple	black	purple			RPS6KB2
NAMPT	0.32011218610858	0.509803434747567	0.339696900863644	0.867005867805447		-0.369252	-0.262279	-0.361265	-0.0308453		purple	black	purple	brown		NAMPT
CCND1	0.108478922758941	-0.791503	0.748949324208398			0.320262415627017	0.0988002447727253	0.226347556127944			purple	green	purple			CCND1
KIF22	0.826620043098212	-0.819284				-0.203082	-0.147975				purple	green				KIF22
CNOT4	0.939723145909853			0.990687220170662	0.979636888503938	0.0158334655385609			0.118446440974181	0.0584815148762054	green			brown	blue	CNOT4
GSTA4	0.783112702588984	0.423431646928168	0.820000466354557	0.537901051318118		-0.260902	-0.545209	-0.0814527	0.2852610339098		pink	black	red	yellow		GSTA4
SCARB1	0.565033361583724		0.55525205414344			0.25122033390201		0.442139846975537			green		brown			SCARB1
NMNAT3	0.717847453329535			0.0411590077689727		0.109558807923688			-0.210791		magenta			brown		NMNAT3
AQP1	0.220712794737852	0.86890031336633	0.810974662378857	0.631715842575534		0.351811915668653	-0.242196	-0.126856	-0.193562		green	black	purple	blue		AQP1
DPAGT1	0.652592247770286		0.897097050552847			0.168217260862074		-0.0256405			purple		purple			DPAGT1
SF3B3	0.777053248659784			0.925288030420304		0.132091996193776			-0.0167615		green			brown		SF3B3
AGL	0.649008327317217			0.606979979282003		0.300533722260567			0.17779372669366		green			yellow		AGL
KEAP1	0.801701531973178	0.887007218207375	0.952256984442381			-0.0200508	-0.0275182	-0.129382			purple	black	purple			KEAP1
SLC1A3	-0.312906	0.48215727651055	-0.846529	0.672227331148369		-0.226171	-0.0174786	0.0199598354792379	0.210484580298591		green	blue	green	brown		SLC1A3
HSP90B1	0.414948599579751	-0.912255	0.958234245440994	0.792946207824443	0.807530180095309	0.00262295934097639	-0.0374733	-0.202805	-0.0211205	-0.222384	green	green	green	brown	brown	HSP90B1
GPNMB	0.624304698840763	-0.895264	0.872672523053257			0.00859762582257265	-0.0330701	0.0686765893812476			magenta	green	green			GPNMB
L3MBTL1	0.758606813839762	0.905293544176255	-0.951183	0.423163900971551		0.13008419215995	0.310729980249636	0.167494375858215	0.065772072051471		green	green	green	turquoise		L3MBTL1
DHFR	-0.708172					0.0521194171646517					green					DHFR
CBFB	0.614481678728674			0.944641825374823	0.888088762644462	0.228174863305002			0.146311413441366	0.149092722522038	green			brown	blue	CBFB
STAT4	0.0217414171430733	0.833277835949558		0.289221986779212	0.966995261573652	-0.105571	0.192328537855104		-0.0374692	0.0645316122066725	green	green		brown	blue	STAT4
CMKLR1	0.346271749862358		0.752540917055619			0.253181839274214		0.281640746108392			brown		blue			CMKLR1
PI4K2B	0.715353742694525			0.341703743085631		0.0358022004431874			-0.219772		magenta			blue		PI4K2B
CEPT1	0.702442701382803			0.598162848452226		0.165850438706096			0.118687289603086		magenta			yellow		CEPT1
C3	0.36658759938412	-0.71365	0.71009341894991	0.842709609483158		0.206456441319008	0.120387322981491	0.212104460193999	0.170006466806462		greenyellow	green	greenyellow	brown		C3
NR2F2	0.545807187844442		0.745702555709652	0.838655375119032		0.561926873263085		0.0078524141185984	-0.0680573		brown		purple	brown		NR2F2
PTGS1	0.252184919707711					0.0946892468444353					purple					PTGS1
ACSF3	0.704943450760645			0.609636057635117		0.00511567042284079			0.089672201382684		brown			brown		ACSF3
AIMP1	-0.875099		0.973865100336983	0.594681297369951		-0.0837914		-0.216969	-0.211914		green		green	brown		AIMP1
GMPR	-0.480608		0.760154907784749			-0.0227242		-0.0172552			green		green			GMPR
PTEN	0.922946515624209	0.793262680419876	0.820369812183131	0.967366780088744	0.978765681030248	0.0825385253386572	0.170187687489875	0.0728462578362351	0.0758497259156562	0.0275418682114657	blue	green	brown	brown	blue	PTEN
P2RX4	0.769535280802418					-0.487012					purple					P2RX4
CDKL3	0.789266334711187	0.881514092113749		0.557337157452782		0.347482912024661	0.207609613173467		0.0297201086998767		green	blue		brown		CDKL3
CRY2	0.736471143849769			0.803691603361382		-0.00973453			0.140614908206624		green			brown		CRY2
STK26	-0.0712626					-0.19358					green					STK26
NCBP2	-0.877973		0.948869530685255			-0.251861		-0.187044			green		green			NCBP2
NR2F1	0.185458042869441	0.764176409625065	0.544557195202464	0.838360661516781		0.32723047716821	0.465569037852426	0.245464350850571	0.0418033944011183		green	pink	purple	brown		NR2F1
PRKAR1A	-0.915583	-0.777089	0.95950084957494	0.708400909810084		-0.139531	-0.0178501	-0.0861351	0.073676052490085		green	green	green	brown		PRKAR1A
NOTCH3	0.671701948603323	0.779748538086889	0.546150202448173	0.446849853076989		0.442439458760609	0.533785279661748	0.562046720437779	0.0899554998659867		turquoise	pink	greenyellow	turquoise		NOTCH3
PDK1	0.53409437314993					0.0271125295878835					green					PDK1
TRPM3	0.870956323320856	0.61867485161456	-0.854436			0.229727601862734	-0.235461	0.00552980627948088			green	green	green			TRPM3
SLC37A4	0.480051201213817					0.189172258712129					purple					SLC37A4
GSTA1		0.781189848661756	0.898452294560554				0.216961185244008	0.0695411833483178				black	purple			GSTA1
CD52		0.935107179271478	0.969259118946504				-0.107762	-0.130094				black	green			CD52
LYZ		-0.875846	0.946763701953987				-0.0862507	-0.083424				green	green			LYZ
CD63		0.985268636144109	0.9870652966174	0.840466232252025			-0.10368	-0.166393	-0.0771607			black	purple	blue		CD63
LY6E		-0.962484	0.969274475860555				0.0800245267328814	-0.10173				green	green			LY6E
PCBP1		0.976199385472839	0.980542232042958				-0.13579	-0.147211				black	green			PCBP1
DUSP2		0.907770697674566	0.905871385899396				-0.0837105	-0.237884				black	purple			DUSP2
CYP24A1		0.680917973171217					0.360868267235511					pink				CYP24A1
HCAR2		0.734877058035256	0.815962300456656				0.152738723090265	-0.0470626				black	purple			HCAR2
CKS1B		-0.9663	0.97633886055769				-0.194137	-0.175434				green	green			CKS1B
PRMT8		0.828891756499751					0.26658312891614					blue				PRMT8
ALOX15		0.887088719429535					0.365662056852129					pink				ALOX15
SIX1		0.787947529866152					0.360448526662777					pink				SIX1
F11		0.877582932278895					-0.427139					turquoise				F11
EIF4EBP1		-0.952432	0.972273613328486				-0.239687	-0.15435				green	green			EIF4EBP1
PYCR1		0.879755664864928					-0.179849					black				PYCR1
PSMB3		0.982478108864165	0.97460117629657				-0.0985036	-0.228416				black	purple			PSMB3
STEAP1		0.632375472729309	0.759470505878579				0.299623724560361	0.293896708350692				black	purple			STEAP1
KCNE1		0.92059793111642	-0.824197				0.224205946388638	-0.173736				blue	green			KCNE1
RAC3		0.877517470278633					-0.113797					black				RAC3
CD69		0.715367218237054	0.876588533885311		0.88241359156467		-0.161737	-0.184707		-0.0774968		black	green		blue	CD69
MOK		0.941537732141053		0.744872819424078			0.331926895730597		0.337954381413438			blue		brown		MOK
HNF4G		0.883760086960757					0.556866780916319					blue				HNF4G
B3GALT5		0.721312339208033					0.282551031360314					pink				B3GALT5
IL1RN		0.800406486545036	0.803322894014195				-0.0995999	-0.0133567				black	green			IL1RN
TNFSF13		0.934266503843289	-0.906929				0.0355762002217916	-3.53711e-05				green	green			TNFSF13
MAT1A		0.824548099217114					0.270345864884245					pink				MAT1A
LPAR3		0.882034020475977					0.414027794491294					pink				LPAR3
KCNJ8		0.533601869029326					-0.462672					black				KCNJ8
ADH7		0.70716645396145					0.244735280670089					pink				ADH7
TREM1		0.849613496897316	0.804155062776853				-0.325529	-0.32939				black	purple			TREM1
PCSK9		0.7999365740981	0.639875542187662				-0.591804	-0.35538				turquoise	turquoise			PCSK9
GJA1		0.753326551104662	0.862707570631735				-0.301074	-0.0812455				black	purple			GJA1
ALDH3A1		0.78268583905439					0.240506043888001					yellow				ALDH3A1
KLK13		0.823740275663527					0.245894759867562					yellow				KLK13
MAPK4		0.765584464375766					-0.209721					brown				MAPK4
CDK3		0.912867156690392	-0.962203				0.0325257445719556	0.0257808131258506				green	green			CDK3
DOHH		0.946047600636003	0.950126122230584				-0.0723572	-0.114733				black	purple			DOHH
PLA2G3		0.442478544527545					-0.478958					black				PLA2G3
HKDC1		0.770864459595427					-0.0800868					red				HKDC1
AKR1C3		0.745529211999302	0.831334047616392				0.158057542619031	-0.362599				black	purple			AKR1C3
SIGMAR1		0.957182664540523	0.919297289457671				-0.164139	-0.0975708				black	green			SIGMAR1
KCNH3		0.878134138770854					0.342422387040762					pink				KCNH3
CAPN9		0.56472015995941					0.0187928465053362					green				CAPN9
SLC5A1		0.671924197122733					0.329283419083368					pink				SLC5A1
FUT2		0.877918228103231					0.541861925581761					yellow				FUT2
SLC26A3		0.753103758096506	-0.930184				0.0268531661325041	0.0187268993129542				green	green			SLC26A3
AKR1B1		-0.877392	0.934228657433364				0.138019294740291	-0.219277				green	green			AKR1B1
CAV1		0.505602477730568	0.906600739039508	0.59542916440585			-0.361223	-0.163696	0.18496612257465			black	green	yellow		CAV1
ID1		0.848134685744795	0.87227696079261	0.360525762186652			-0.14153	-0.118057	-0.324751			black	purple	blue		ID1
F2RL1		-0.839936					0.0424377079054796					green				F2RL1
ABCB6		0.898558775838075	-0.923524				0.0751459824331483	0.0287607926807588				green	green			ABCB6
TK1		-0.812323	0.889501008528073				-0.124777	0.0385414496946203				green	green			TK1
ALK		0.754564762599434	-0.795634				0.185799025562873	0.126925751503626				green	green			ALK
CES1		0.89617199580423	0.890973776907283	0.48476117100966			0.134581307094561	-0.368627	0.0652797509252154			yellow	green	yellow		CES1
ITGB2		0.737228014348293	0.896052037182841		0.799664136362181		-0.0210738	-0.158603		-0.153592		black	green		brown	ITGB2
SLC26A4		0.373459241225455					0.252970082761058					pink				SLC26A4
NOXO1		-0.645926					-0.211296					green				NOXO1
SLC28A3		0.671483514554319	0.565920247909214				0.428193701542121	0.670288819034887				pink	brown			SLC28A3
SRD5A2		0.854178274824528					0.47710073656392					pink				SRD5A2
B3GNT3		0.813601147418375					0.481011827419841					yellow				B3GNT3
KCNJ3		0.466601848204107	-0.818978				0.00958414878232811	-0.0532				brown	green			KCNJ3
TRPV1		0.840449792769277	-0.942795	0.45119794846716			0.190863342948084	0.169383590245135	0.0356883896339501			green	green	turquoise		TRPV1
SLC13A3		0.897794685299486	-0.88868	0.201167456952932			-0.0501107	0.193016832589294	0.147185907696457			green	green	brown		SLC13A3
ANKK1		0.846873086189327					0.313887074409796					blue				ANKK1
NAT1		0.845466379529255	0.887986585806446				0.438655007361233	0.0614769554808131				blue	green			NAT1
BMP4		0.588369793563605					0.34767407774132					yellow				BMP4
TGM2		0.74246737914151	0.808711829026732	0.924255865063018			0.398796917936588	0.0821166422845773	-0.00951391			yellow	purple	brown		TGM2
PARP15		0.761445791167551	-0.920405		0.796505498095562		-0.0387706	0.115240672899804		0.0446190117179872		green	green		blue	PARP15
CAPNS1		0.964413991671125	0.979478812014288				-0.0919368	-0.120013				black	purple			CAPNS1
VAT1		0.928099659639766	0.961252804244808				-0.233161	-0.142453				black	green			VAT1
CDKN2A		0.818085819313613	0.687900730079259				0.51634179867887	-0.047593				pink	green			CDKN2A
CYP2C19		0.427431871711126					0.165145409950908					blue				CYP2C19
FADS1		0.656844059110667	0.714016120255923				-0.609798	-0.428613				black	purple			FADS1
ENPP3		0.693973823656933	0.505718792934482				0.356165920196342	0.447745958360038				blue	blue			ENPP3
FUT6		0.661361432433459					0.0894318597351179					yellow				FUT6
SRCIN1		0.852164432968381					0.419192299427941					blue				SRCIN1
ADIPOR1		-0.940021	0.94821915805784				-0.211499	-0.305558				green	green			ADIPOR1
SLC27A2		0.668637261322649	0.824956543175173				0.5259833720147	0.168754949451538				pink	greenyellow			SLC27A2
SLC6A3		0.328708093564884					0.0577613332224076					green				SLC6A3
FMO3		0.828345664502954	0.608020728079691	-0.0465776			0.410572554248204	0.328819410629355	0.0867229632642059			pink	purple	brown		FMO3
POU5F1		0.479212577490999					0.0141233371122878					blue				POU5F1
VNN1		0.789597343789015	0.257266596001762				0.306475168520837	0.197769688446966				pink	yellow			VNN1
HSPA14		-0.942531	0.945425087050609				0.00405618260357623	-0.164812				green	green			HSPA14
HNF4A		0.770908783860169					0.436022711292161					blue				HNF4A
TNFSF13B		0.72055723486858		0.804400605513864			0.142587515246243		0.173256073500581			green		brown		TNFSF13B
AMPD3		0.920673069474053	0.752029792295519				0.351314768092718	0.285910453713422				blue	blue			AMPD3
PFKP		0.629746462975814		0.387958435848448			0.532124671036625		0.127519770133997			pink		blue		PFKP
TIAM1		0.896789956357493	-0.935196	0.0627195462087693			0.478409836982493	0.222494558371902	0.388060055627598			blue	green	brown		TIAM1
SULT2B1		0.711768392958629					0.319791414417357					yellow				SULT2B1
SLC6A8		0.842465422365829					0.123061124973558					yellow				SLC6A8
C5AR1		0.715500520464743	0.654390863677241				0.283364962645274	-0.389455				blue	purple			C5AR1
EPHX1		-0.78806	0.882173862015291	0.209840000156129			0.209764010029304	0.0590596713114671	0.400329796218712			green	green	turquoise		EPHX1
KCNJ5		-0.33078	0.446906728537965				-0.132323	0.650381707686623				green	brown			KCNJ5
LGALS4		0.742092311003239					-0.142941					black				LGALS4
KCNB1		0.721147044265641					0.32057653038666					blue				KCNB1
GABRB3		0.688681625778265					0.466096020566959					blue				GABRB3
IGSF11		0.625017925846861					0.207096434621153					brown				IGSF11
ABCC3		0.687566175422544	-0.838968	0.46852128272938			0.536957234904528	0.162478689039664	0.167766761343634			green	green	brown		ABCC3
GSTA3		0.716675774279998					0.198310810172651					pink				GSTA3
CHN2		0.697081613385571					0.212334258650262					pink				CHN2
KIT		0.496028977678007	0.584700597677288				0.337268276431779	0.182761426628232				green	brown			KIT
SLC16A3		0.856678863151363	0.926314687797006				0.0422457709762219	-0.238472				black	purple			SLC16A3
PPT1		-0.86656	0.951957828270131				-0.15062	-0.129384				green	green			PPT1
MAPK3		-0.878096	0.914159226228407				-0.12141	-0.0536433				green	green			MAPK3
SMPD3		0.692760005211225					0.192083893844897					blue				SMPD3
SLC1A2		0.603285970789372					0.133965895453491					blue				SLC1A2
STK38		0.905709392202398		0.879212504473668	0.967356383337208		0.39934269182022		0.216158498063571	0.00602293791601204		blue		brown	blue	STK38
ESRRB		0.756696876372957	-0.938043				-0.0566301	0.0110930442958006				green	green			ESRRB
PPIP5K1		0.887833431608445	-0.961526				0.242026205813434	0.145330234034332				green	green			PPIP5K1
DNM1		0.791318669270109	-0.869128	0.62601438799395			0.183949422455633	0.31359367755728	0.4178054100386			green	green	yellow		DNM1
GSTT2B		0.148982828144201	0.352724054787718				0.114915838870988	0.175180056624767				green	yellow			GSTT2B
ATP6AP1		-0.928813	0.94524178588538				-0.0673093	-0.166103				green	green			ATP6AP1
AMD1		-0.713606		0.776728218710537			-0.143477		-0.167278			green		blue		AMD1
HSD11B2		0.625683365272757					0.162890517154523					black				HSD11B2
FGF1		0.634956114972197					-0.0679407					green				FGF1
PDE11A		0.807391783792434					0.330257874598307					blue				PDE11A
YWHAQ		-0.753279	0.945810351028497	0.897482010585615			-0.0498118	-0.0670715	0.159533234553796			green	green	brown		YWHAQ
CNOT7		0.703784162828339	0.950876686708068				0.14301849004628	-0.212534				black	green			CNOT7
SQSTM1		0.849703511049484	0.906043930180756	0.83183500531422			-0.152417	-0.277864	0.122568636070619			black	purple	brown		SQSTM1
SLC40A1		-0.808904	0.519191367480106	0.733353998988655			-0.137929	0.320590231423026	0.0765404586057128			green	purple	yellow		SLC40A1
CDK1		0.664881001726529	0.767466412886065				0.0282545240267619	0.125645643011739				black	green			CDK1
SPIN1		0.792014863784906		0.957117950678183			0.316928110294577		0.34351339334954			brown		yellow		SPIN1
RPS6KA6		0.796369890467701					0.388026524076886					blue				RPS6KA6
LAMA1		0.349690749989243	0.69296023043181				0.162441789277206	-0.187919				blue	blue			LAMA1
SAT2		0.923978654325799	0.939208506281397	0.816519638847404			-0.0418856	-0.220446	-0.190821			black	purple	turquoise		SAT2
RPN1		-0.936227	0.97696065521684	0.527418652503957			-0.0777915	-0.211352	0.0811844405461257			green	green	blue		RPN1
MYLK3		0.470537366954676					0.107904961307858					brown				MYLK3
PCSK4		0.634558291703401					0.20835366280135					pink				PCSK4
FDPS		0.698791090554575	0.899794461690101	0.138055357322784			-0.521898	-0.28135	-0.0569241			black	purple	turquoise		FDPS
FERMT1		0.669901636032945					0.587447739839443					pink				FERMT1
ADCK1		0.857574554170593	-0.955241				0.0521918829556238	0.155879566612503				green	green			ADCK1
E2F1		0.388425373447304					-0.327074					black				E2F1
HPCAL1		0.779995546756229		0.787935225558534	0.926379262158284		-0.62106		-0.0517151	0.0236471970158026		turquoise		yellow	brown	HPCAL1
GPR68		0.712691801113134					-0.296341					turquoise				GPR68
SLC27A5		-0.801245	0.824176603148629				-0.177706	-0.0884233				green	green			SLC27A5
NPR2		0.830554360442213					0.15309955801315					green				NPR2
TPM1		-0.496903	0.825577576658234	0.968854597621883			0.128873796113483	-0.109697	0.0155044347253192			green	purple	brown		TPM1
SLC47A1		0.287898853706613	0.911078245354348				0.2514745695412	-0.125954				green	turquoise			SLC47A1
PSMA1		-0.945345		0.951326442139441	0.856729007579999		-0.265037		0.0145870089100603	0.144991607041672		green		brown	blue	PSMA1
USP1		-0.833275	0.952964606317522				-0.135714	-0.200731				green	green			USP1
TLR4		0.357877966055567					-0.324287					black				TLR4
TLR5		0.422806452303824					0.48303376666564					pink				TLR5
HSD17B13		-0.0280513					0.0788907510426004					green				HSD17B13
RAB11A		0.893069864763677	0.974146525558102	0.61362111960913			0.0148073847968119	-0.168264	-0.122308			black	green	brown		RAB11A
PRKACB		0.832622984457438		0.853173571329144	0.955893881100396		0.43973507017801		0.316332513392075	0.0330606376604003		brown		yellow	blue	PRKACB
CDKL4		0.640047809528734					0.111643498921593					green				CDKL4
LPCAT1		0.910233873503289		0.653164285342752	0.702026028550352		-0.343597		0.163899241318792	-0.235592		turquoise		brown	brown	LPCAT1
PIK3R2		0.694586486785998	-0.80122				0.122892223699808	0.162635000901868				green	green			PIK3R2
RAB29		-0.8144					-0.132549					green				RAB29
BRCA1		0.756882423128108					0.131029382398536					blue				BRCA1
TDP1		0.815628712736407					0.468039453669897					blue				TDP1
TSSK3		0.649084687102116					0.0686974751057702					brown				TSSK3
EPHB3		0.619547427535864					0.297723571966749					yellow				EPHB3
WDHD1		0.694174739007613	0.827237801147366				-0.0244584	0.241914551200556				brown	brown			WDHD1
ARL5B		-0.733295	0.85797843819039				-0.102429	-0.169824				green	purple			ARL5B
CBR3		0.778611576316673	0.876310581524816				-0.0248228	0.157798700179901				black	green			CBR3
HSD17B12		0.783971535038512	0.911547760053351	0.496513406533464			-0.137442	-0.176255	-0.225285			black	green	yellow		HSD17B12
LTB4R		0.652034516437621					0.320105302938806					blue				LTB4R
PON1		0.364899019826675					-0.100079					brown				PON1
PINK1		-0.857405	0.842355431595955				-0.144794	0.0518732980271265				green	green			PINK1
PAK1		0.839615991840667		0.745265303521122			0.375017695531235		0.271177824900178			blue		yellow		PAK1
LOXL4		0.740361210479634					0.406944368931655					pink				LOXL4
CA1		0.335587503340616					-0.111612					brown				CA1
ARL5A		-0.730118	0.954939586929375	0.772399498460372			-0.0841693	-0.0928599	0.230528947494465			green	green	brown		ARL5A
HSD17B1		0.69442534529484					-0.133839					black				HSD17B1
MAPT		0.652573431457866					-0.572052					turquoise				MAPT
CYP2C8		0.56343775367154					0.188307587181621					green				CYP2C8
EIF4A1		0.884072589746993		0.838762501123735			-0.223694		-0.0797155			black		brown		EIF4A1
HYOU1		0.778772419087613	0.827429031504228				-0.053759	-0.206439				black	purple			HYOU1
NCEH1		0.647838212489137		0.101337260610389			0.275875282625408		0.223395249754595			green		brown		NCEH1
MYLK4		0.790868502995375	-0.941776				0.117638153161131	0.141638454803808				green	green			MYLK4
DLG4		0.672551322713795	0.721279454822086	0.431025032002438			0.353401306222648	0.19291146797756	0.430391284201867			green	blue	turquoise		DLG4
PFKFB4		0.667775179955403	-0.9471				-0.132433	0.122957226765907				green	green			PFKFB4
HPSE		-0.638838					-0.0229161					green				HPSE
TLR3		0.809370946959154					-0.28157					black				TLR3
BAG3		0.783512224603354	0.796526619397513				-0.0491644	-0.0030822				black	green			BAG3
MADCAM1		0.42721373559801	0.456564960535019				-0.094812	-0.0121653				blue	blue			MADCAM1
SLC7A5		0.728469865050653		0.644528395948404	0.856706401287504		-0.127235		-0.0788564	-0.0190159		green		brown	blue	SLC7A5
PTPN1		0.483834291258783		0.896150873381308	0.928487817564987		-0.265292		0.030258580072976	0.0707077507132844		green		brown	blue	PTPN1
TAOK3		0.572632805560764		0.970599634847699	0.969722776413098		-0.183797		0.0435786531750063	0.00586858150371542		green		brown	brown	TAOK3
ACKR3		0.530630561514499					0.266539487633766					pink				ACKR3
NET1		0.55482661635177	0.653749602724189				0.226188364198904	0.222094973948882				black	purple			NET1
DDX3X		-0.578008		0.889750543687646	0.783483507330134		-0.00370026		-0.0259372	-0.201841		green		brown	blue	DDX3X
TPM3		-0.673342	0.949977364800681	0.83297893405004	0.591123653940614		-0.116482	-0.200424	0.0248028298852338	0.035525098864777		green	green	brown	blue	TPM3
SLC22A1		0.744167039532645	-0.865324				-0.0380226	0.0192191008293118				green	green			SLC22A1
FANCF		0.647042118402957	0.85139654048353				0.0156063201160469	0.014227749947229				black	green			FANCF
TXNL1		-0.885413	0.976592509968263	0.808857354364863			-0.114913	-0.198808	0.0276052612891248			green	green	brown		TXNL1
KPNA3		0.81279092312471		0.910992092092921			0.211587006194594		0.139475870072434			brown		brown		KPNA3
LIPE		0.648545561844091					0.231630746916681					black				LIPE
EPHA2		0.745797322170732	0.846393326211288				0.119456753533339	0.286289752273879				black	greenyellow			EPHA2
ORAI2		0.733847941525591	0.839777126122754				0.45238054412267	-0.0603596				pink	purple			ORAI2
CDC25B		0.30691534480453		0.76456466311724			-0.216859		-0.0841128			black		turquoise		CDC25B
BDH2		-0.744894	0.871970095413829	0.714975714959218			-0.0603445	-0.00812392	0.333975425892738			green	green	yellow		BDH2
PIK3CD		0.763644415394615	0.8203493153273		0.91170462829172		0.220735179384782	0.0243958297454555		0.0909420226771124		green	blue		blue	PIK3CD
AXIN1		0.700797181620908		0.604403530517012			0.117480790887158		0.325361561667552			green		turquoise		AXIN1
TXNRD1		0.0236025896527776		0.883799937018468			-0.361177		-0.211486			green		brown		TXNRD1
GZMB			0.93778620075735					-0.185216					green			GZMB
CCL5			0.942234797168364		0.631965104704812			-0.22882		-0.289008			green		turquoise	CCL5
TPSB2			0.79853466203556					-0.032147					green			TPSB2
TPSAB1			0.858553644314025					-0.0204468					green			TPSAB1
RBP4			0.93401626645961					-0.143706					green			RBP4
PRF1			0.887426113094471					-0.319135					purple			PRF1
ANG			0.942230964636589					-0.0929944					green			ANG
DCTPP1			0.955478985896575					-0.0382064					purple			DCTPP1
IL1B			0.865982148148292					-0.262457					purple			IL1B
FABP3			0.755922854930502					0.0242074625693373					purple			FABP3
CD3E			0.910416531421772					-0.165924					green			CD3E
P2RY12			0.913099742181926					0.183796628886845					blue			P2RY12
HSPA2			0.90647612312805					-0.0854765					green			HSPA2
MMP9			0.67787470733356					0.141071074198332					purple			MMP9
GRIK1			-0.913163					-0.00574473					green			GRIK1
NUDT1			0.966377456777332					-0.181148					green			NUDT1
HAMP			0.599002736622434					0.188981226500486					purple			HAMP
HCAR3			0.84421359841366					-0.280689					purple			HCAR3
ICAM3			0.917011383745098					-0.210389					purple			ICAM3
KCNK13			-0.904617					0.0227986613677581					green			KCNK13
CATSPER1			0.89100530209866					-0.324906					purple			CATSPER1
BIRC7			0.284679327597055					0.223386304627566					green			BIRC7
SELL			0.77829208982529					-0.130792					purple			SELL
IL4I1			0.623982035291517					0.251002850406247					purple			IL4I1
FPR2			0.712831359678643					-0.436408					purple			FPR2
TNF			0.57881872260071					-0.0231576					purple			TNF
FEN1			0.908002428580492					-0.214959					green			FEN1
PHKG1			0.901405959897099					-0.0162168					purple			PHKG1
TCF7			0.84777166635319					0.0521451390678715					purple			TCF7
CDK5			0.900555301585453					-0.177301					green			CDK5
GNAO1			0.444403588057855					0.414171292557336					brown			GNAO1
TRPM2			0.878190230795912					0.128735438879265					blue			TRPM2
CDK15			0.698864785576048					0.178302090107383					blue			CDK15
BIRC5			0.791873447771469					0.181242081021219					green			BIRC5
IL1A			0.399687146201079					-0.439989					purple			IL1A
HSD11B1			0.814040227211657					0.00236379251120139					purple			HSD11B1
FLT3			0.764692546326164					-0.285499					blue			FLT3
TPBG			0.727265566436034					0.0964057367730094					purple			TPBG
CCR6			0.58377231228293					0.105389232784323					purple			CCR6
FGFR4			0.724661533396654	0.547674105231247				-0.188646	-0.371716				pink	turquoise		FGFR4
CTRL			-0.887353					-0.0355419					green			CTRL
GRIN2D			-0.772024					0.156205558244336					green			GRIN2D
CHRNB1			0.902280199561407					-0.0902785					green			CHRNB1
SLC24A4			0.785342170177186					-0.114492					blue			SLC24A4
MGAT3			0.827729669347398					-0.068851					turquoise			MGAT3
APOBEC3A			0.451367050962419					-0.110707					purple			APOBEC3A
BST1			0.879312240060539					-0.190752					purple			BST1
FPR1			0.814651155475401					-0.406337					purple			FPR1
HTRA1			0.517894684980886					0.128884960705601					purple			HTRA1
CASP5			0.430989091126855					-0.0602471					blue			CASP5
SELPLG			0.836800443348555					-0.194911					purple			SELPLG
KCNA3			0.634081208626429					-0.276109					turquoise			KCNA3
CD80			0.736243879926728					0.118463577566483					blue			CD80
CCNB1			0.754743342668766					0.101236053808919					purple			CCNB1
FFAR4			0.696788576162761					-0.209228					turquoise			FFAR4
CAMKK1			-0.913094					0.095202077431793					green			CAMKK1
SLC36A1			0.873836932099357	0.0908988774724627				0.198768458941913	0.313862614560882				blue	brown		SLC36A1
P2RX1			0.725844101243587					-0.132468					blue			P2RX1
GPAT3			0.286736115176156					0.27437102324305					brown			GPAT3
SENP3			-0.874298					0.154248432118304					green			SENP3
JAK3			0.60987929524225		0.910275082194792			0.0578815263319892		0.11835557998154			blue		brown	JAK3
UAP1			0.832099650711019	0.757563607156637				-0.159596	-0.0317325				green	brown		UAP1
PEF1			0.975660869169482					-0.195983					purple			PEF1
PDE1B			0.767149525057764					-0.148013					blue			PDE1B
PLEKHA4			0.720655288832826	0.157111319649446				0.300056494009732	0.377200233314453				purple	brown		PLEKHA4
HPRT1			0.961888356033712	0.353889527339677				-0.0952174	0.0559928333680701				green	blue		HPRT1
MMP14			0.860499360488215	0.609453360426287				-0.000862544	0.0458612855734617				purple	turquoise		MMP14
SCN1B			0.500658679179968					0.285689674855829					green			SCN1B
NIPSNAP1			0.816929468489591					-0.0912938					green			NIPSNAP1
SLAMF7			0.33071310658066					0.272187298224536					purple			SLAMF7
CSRP1			0.911312730342671	0.865343412511912				-0.116193	-0.121315				green	brown		CSRP1
TLR2			0.811662456145919					-0.195021					blue			TLR2
PPM1G			0.983403827619473	0.531997668188228				-0.135718	-0.249855				purple	turquoise		PPM1G
PDE4B			0.865599892256117	0.711679732280705	0.929059461511418			0.0317533286412796	0.306021630266285	0.199517337133625			blue	brown	blue	PDE4B
CCR1			0.864637346746248					-0.0144889					green			CCR1
PIK3CG			0.797544078631777					0.0699484337212609					blue			PIK3CG
RUVBL1			0.902959354393607					-0.0264566					purple			RUVBL1
P4HTM			0.906667261832903					0.0112052953090744					green			P4HTM
CCNB2			0.706428353737566					0.0657580575671147					green			CCNB2
MAP1LC3A			0.819785466747643	0.493196297297232				0.0295159843955756	0.0930107679980827				purple	yellow		MAP1LC3A
FAM20C			-0.66031	0.746037651584033				0.390907768857241	0.258748518190877				green	brown		FAM20C
CD209			-0.157567					0.368492836448947					green			CD209
TPM4			0.935344902937424	0.938743986457975	0.6248822508952			-0.144281	0.0573658795286502	0.0323178512698545			green	brown	blue	TPM4
ARSB			-0.892123	0.42283738802603				0.0346010967425602	0.31439564336572				green	blue		ARSB
PPP1R15B			0.882352371764523					-0.293812					purple			PPP1R15B
EPOR			0.757877904847593					-0.130816					purple			EPOR
CBX1			0.922976182162094					-0.0724666					green			CBX1
EIF4H			0.972516490114052	0.604656442585618				-0.169362	-0.100698				green	blue		EIF4H
TGFB3			0.466080475106512	0.480210861589519				0.199549810953104	0.466363653364908				purple	yellow		TGFB3
PANK1			0.743583322721989					0.356659689239672					brown			PANK1
NEU3			-0.877734					0.0971760220268361					green			NEU3
EIF4E			0.896914488089821	0.553874815874214				-0.111499	0.0662575695796763				green	brown		EIF4E
GLOD4			0.961512256183877					-0.170089					green			GLOD4
ERCC1			0.93672996531059	0.830335829006291				-0.112043	0.119699271150577				green	blue		ERCC1
SMN1			0.809985680452819					-0.225526					green			SMN1
TEAD3			0.722261148329678	0.882579841606785				0.327372892506337	-0.0588839				magenta	brown		TEAD3
STIP1			0.827941580852345					-0.0305133					purple			STIP1
EIF2S1			0.955298228156569	0.472558349450887				-0.165047	0.0255974175685205				green	blue		EIF2S1
LAP3			0.904945087977208	0.566888662839195				-0.192452	0.0995451108027059				green	blue		LAP3
YWHAE			0.962449001679523	0.978928563087034	0.799808917464084			-0.0851989	0.173311679496917	0.184466551097729			purple	brown	brown	YWHAE
UBE2D3			0.943233068348398	0.96690735816482	0.831704064272381			-0.243268	0.0826402692969765	0.0580240345577069			green	brown	blue	UBE2D3
RARG			0.394771864269933					0.208908806633788					purple			RARG
ELK1			0.798671689003611					-0.0507293					green			ELK1
EGLN2			0.918520396040055	0.816803909678896				-0.175783	-0.0217617				green	turquoise		EGLN2
AIMP2			0.947916768343556					-0.194172					green			AIMP2
SUCNR1			0.53159183507141					-0.00310474					purple			SUCNR1
IKZF1			0.840486906963697		0.986132940734539			-0.0264275		0.0557808349069516			blue		blue	IKZF1
AURKA			0.698561889175127					0.128390731686332					green			AURKA
CASP2			0.763743992423973					0.235322660880188					brown			CASP2
ILK			0.954049613013911	0.807419351172395				-0.186559	0.000987423935737225				purple	brown		ILK
ESPL1			0.626613344511488					0.0676577427203689					blue			ESPL1
LOXL3			-0.892903					0.167482394844849					green			LOXL3
MC1R			0.548870645475688					0.0900273187108544					brown			MC1R
IL3RA			0.377934538956794					-0.125195					green			IL3RA
P4HA2			0.786379901530574	0.512701299524778				-0.000237837	0.312586753658292				purple	brown		P4HA2
CCND2			0.70453716751159	0.600821576754564	0.757232379601796			0.135400558482918	0.223262386722712	0.130234449097185			purple	brown	brown	CCND2
GSTK1			0.952739779073476	0.808237383501789	0.944037748046857			-0.21572	0.0167568293782566	0.0465168508683092			green	brown	brown	GSTK1
SETDB1			-0.964476	0.839128624060253				0.0303298551083519	-0.0312782				green	yellow		SETDB1
COQ7			0.836088257927026					-0.201221					purple			COQ7
VDAC3			0.943690957375991	0.722158966323912				-0.126822	0.0872997340128243				green	yellow		VDAC3
CASP4			0.931741472606101	0.726208309143022				-0.141749	0.153040369187459				green	yellow		CASP4
ABAT			-0.934493					0.189084582843161					green			ABAT
STAMBPL1			-0.788898	0.837069884600984	0.742508563810018			0.124547223386839	0.191256098232781	0.103499125226543			green	yellow	blue	STAMBPL1
TERF2IP			0.930777781357319	0.928642701615494	0.543314485343948			-0.312243	0.0268002813869915	-0.234193			green	brown	blue	TERF2IP
RBBP7			0.962678183158188	0.576408885772828				-0.14253	0.118578959254025				green	brown		RBBP7
RELA			0.935287540445293					-0.134798					purple			RELA
PNPO			0.749118013449711					-0.165836					green			PNPO
SF3B2			0.949766860564744	0.685670525427347				-0.248701	-0.195745				green	brown		SF3B2
ATAD5			0.858982175940557					0.109068608836179					blue			ATAD5
PEX2			0.949650987600101					-0.189466					green			PEX2
IRS1			0.763730880270489	0.890634620694483				0.485845260831276	0.200810114192745				magenta	brown		IRS1
MPEG1			0.429288571967377					-0.246797					purple			MPEG1
PLK4			0.491827272116854					0.287397940944279					brown			PLK4
KIF23			0.251412403337543					0.233181294269888					brown			KIF23
ERBB2			0.914168720740617	0.491079904377554				0.388573198700805	0.222986429406965				greenyellow	turquoise		ERBB2
UBE2D2			0.954847462831158	0.983231315985541	0.879895879044804			-0.177215	0.103273848729893	0.0097608220741922			purple	brown	blue	UBE2D2
APAF1			-0.938022	0.548690441028487				0.0608852470835975	0.435432674428991				green	yellow		APAF1
CDK2			0.811585287209972					-0.0568868					green			CDK2
SIRT2			0.931827063459009	0.761933589926006				-0.154246	0.149016299775219				purple	turquoise		SIRT2
KIF11			0.563594294348628					0.479366896568518					brown			KIF11
ATM			0.962581452860491	0.958552111881604	0.971289772609086			0.00286449104594613	0.116021521885034	0.0195427713190303			blue	brown	blue	ATM
HIF1A				0.952178982655026	0.881634870672878				0.139373603581188	-0.075839				brown	blue	HIF1A
PIK3R1				0.930795994984924	0.964281950198941				-0.0437124	-0.00606055				brown	blue	PIK3R1
RBM39				0.976377896904246	0.956950831481408				0.0108129138613733	-0.0694546				brown	blue	RBM39
FLNA				0.933014674548863	0.839300827275476				0.0248600680536489	-0.062232				brown	brown	FLNA
LRP1				0.958121778545251					0.0678856454209812					brown		LRP1
FNIP1				0.983892543598062	0.818563441647572				0.0883532152345715	-0.199884				brown	blue	FNIP1
CFLAR				0.987937857940651	0.968538823096519				0.0549072845213742	0.0113368954105559				brown	brown	CFLAR
CTNNA1				0.983574157195966					0.10967288469053					brown		CTNNA1
ROCK1				0.988200088574981	0.965806249802788				0.0564234034159067	-0.0022003				brown	brown	ROCK1
CCNH				0.933844798158024	0.852978158373925				0.0406987719514235	0.0622955465836248				brown	blue	CCNH
TOP1				0.967532276625033	0.956953088878785				0.0581783718019813	-0.00288966				brown	blue	TOP1
BCL6				0.944164812470718					0.0379146147946871					brown		BCL6
CACNA1H				0.157573288585452					-0.320982					blue		CACNA1H
EEA1				0.982276824798036	0.816149443450518				0.116391811144285	0.122847196752587				brown	blue	EEA1
ITGB1				0.961728846318248	0.81801011290179				0.0546157437476606	0.204210360407235				brown	blue	ITGB1
SF3B1				0.973919128508095	0.923098641779332				0.109010124730422	-0.0678958				brown	blue	SF3B1
BRD4				0.985161994161231	0.964919005552263				0.0665820492925027	0.112964564568191				brown	brown	BRD4
NR3C1				0.972564992652879	0.970022198091071				0.152173883235844	0.177618006454051				brown	blue	NR3C1
NFKB1				0.946467109440973	0.912280722871269				0.0976422520675239	0.0740008261879988				brown	blue	NFKB1
MPHOSPH8				0.925239133028931	0.977354875844564				0.133773226250967	0.11120364766263				brown	brown	MPHOSPH8
GNB1				0.979178650210898	0.96510485132769				0.155928086379749	0.0416660434269368				brown	brown	GNB1
SORT1				0.856839950222727					-0.121957					brown		SORT1
MAPK1				0.977496222128506	0.949301048423989				0.125185514461781	-0.0787088				brown	blue	MAPK1
WNK1				0.939662957776201	0.979433822003473				0.148156917001666	0.127484701020922				yellow	blue	WNK1
USP33				0.94822134673831	0.953941280433627				-0.0208828	0.00673856466303627				brown	blue	USP33
ACTR3				0.962833025046449	0.92032307786507				0.0649875694362475	-0.0160139				brown	blue	ACTR3
RBPJ				0.92948350755765	0.950617986320705				0.07625641767471	0.140353194301701				yellow	blue	RBPJ
EWSR1				0.981801868329407	0.917299570063324				0.0725853307156978	-0.0041844				brown	blue	EWSR1
NFE2L2				0.970814227960199	0.722228997478537				0.170815052957828	-0.172177				brown	blue	NFE2L2
ELOVL5				0.855788083560815	0.955959915534613				0.0333548911868069	0.0592119061586643				brown	blue	ELOVL5
CLK1				0.944362872249698	0.911294720052038				0.124706452081778	0.0126444028444514				brown	blue	CLK1
PBRM1				0.967509784239463	0.966563293307199				0.178552496215956	0.0750360463191577				yellow	brown	PBRM1
CHCHD3				0.974778588739705	0.908750100719983				0.105731278445544	-0.0609272				brown	blue	CHCHD3
ILF3				0.913452648827334	0.959888335495038				-0.0145613	-0.0474563				brown	brown	ILF3
MDM4				0.990130706204414	0.959592917614248				0.0754274775997881	0.053335813350115				brown	blue	MDM4
CLTC				0.985768485790831	0.835043935349418				0.106571047222579	0.13784141894041				brown	blue	CLTC
PRDM2				0.984284826838764	0.975152204120172				0.156171757246728	0.111824452764208				brown	blue	PRDM2
PFKFB3				0.845478778057855	0.865026228393997				0.0492351770336504	0.0288441511524909				brown	brown	PFKFB3
GPI				0.906042003326409	0.833656405877278				0.203083277770043	0.136133225061209				brown	brown	GPI
CHD1				0.938002045885194	0.927605554119535				0.0159435194463066	-0.0374715				brown	blue	CHD1
RAP1A				0.942577897918818	0.963421463376525				0.163017514922225	0.0349089578499806				brown	blue	RAP1A
USP3				0.97899064250558	0.955198502150101				0.060340568572566	0.0459626669389789				brown	blue	USP3
PLEC				0.823506285779115	0.832717836437239				0.215306789689124	0.0793707589336516				brown	brown	PLEC
CAPN2				0.94039583991993	0.887013311052273				0.137251102151382	0.0750987034967327				brown	blue	CAPN2
SMAD2				0.903931349640892	0.892105501667486				0.204772843658762	-0.0680588				brown	blue	SMAD2
ATP2A2				0.909366907144614	0.783619458803201				0.235056998659558	0.165383908726946				brown	blue	ATP2A2
THRAP3				0.983423577572248	0.89564312291528				0.136433536649357	0.0477399362097347				brown	blue	THRAP3
ACSL3				0.910278636356815					0.117446953474835					brown		ACSL3
VEGFA				0.57589490755636					0.141405907916126					blue		VEGFA
FAM120A				0.889387501625888	0.942639846981507				0.165965261824827	0.157317607272687				brown	blue	FAM120A
KDM5A				0.947883700180011	0.947847824717076				0.0447722659176436	-0.0465639				brown	brown	KDM5A
FUBP1				0.988599248895387	0.964489481896584				0.0636775599723118	0.00509840393049403				brown	blue	FUBP1
YTHDC1				0.973563530839084	0.944579393090278				0.0523217697135671	-0.0796074				brown	blue	YTHDC1
WTAP				0.927363550314154	0.82802383437079				0.0455368982293949	0.11291752068439				brown	blue	WTAP
P4HA1				0.716362864117327					0.178035901673242					brown		P4HA1
DHX36				0.965359992237948	0.900790953101729				0.0693807229073399	-0.0253413				brown	blue	DHX36
PSMD1				0.947201065863814	0.917038736519858				-0.0312409	-0.121544				brown	blue	PSMD1
CCND3				0.901599999496696	0.958848231180558				0.181645564699109	0.0562508422692573				brown	brown	CCND3
KCNK3				0.163847475913199					-0.188926					brown		KCNK3
SMARCA4				0.90223362438186					0.178654180479983					brown		SMARCA4
QSOX1				0.89750128311757					0.0373376501219191					brown		QSOX1
RAF1				0.979706658694722	0.92779968028748				0.0292325608473059	-0.0388447				brown	blue	RAF1
PTCH1				0.636110574804702					0.207149350677889					yellow		PTCH1
PAK2				0.93744264333636	0.946796589210767				0.0182565875221173	0.0342184589571421				brown	blue	PAK2
PTH1R				0.613990147680854					-0.0635785					brown		PTH1R
CNOT1				0.968808842596045	0.897030658293314				0.0473622646668447	-0.0160308				brown	blue	CNOT1
HM13				0.953199516786258	0.713832752590418				0.00689444424189145	-0.299978				brown	blue	HM13
ATP1A1				0.825348144513939					0.167275050813146					brown		ATP1A1
ADCY3				0.823275079526628					0.138932313611637					brown		ADCY3
AGTR1				0.0537628670174396					-0.544462					yellow		AGTR1
KIF5B				0.94267784270142	0.841690988206815				0.116676121085725	0.0490611736709434				brown	blue	KIF5B
ADAR				0.958216537915087	0.899650932783679				0.043179828248768	0.00460238062547354				brown	blue	ADAR
FAS				0.936139793667643					0.112788838654431					brown		FAS
NAP1L4				0.980649098622699	0.955369645313878				0.123107322163238	0.055380617459541				brown	blue	NAP1L4
MAPKAPK2				0.808606960757643	0.80485110399798				0.20394335219276	-0.10138				brown	blue	MAPKAPK2
LYPLAL1				0.948677694561877					0.252701865258454					yellow		LYPLAL1
GFRA1				0.0113821717071443					0.0298329917541804					brown		GFRA1
HNRNPD				0.950654779708758	0.853461616292667				0.0779456784806546	0.0720014915782321				brown	blue	HNRNPD
UBA6				0.793266843230419	0.844269470743351				0.205129103089603	-0.114112				brown	blue	UBA6
SRSF1				0.947495577059947	0.867551535900232				0.000200933065184955	-0.120069				brown	blue	SRSF1
OLA1				0.93353636490866	0.86080559773618				-0.0146724	0.0323176792477216				brown	blue	OLA1
PIN4				0.717572724215022					0.0481040534694511					brown		PIN4
CHD4				0.893866884723061	0.630986216468692				0.14215351869283	-0.240652				brown	brown	CHD4
MDM2				0.866854557428784	0.934418746539566				0.0398992782439641	0.0301519007191374				brown	blue	MDM2
HIBADH				0.935284187197311					0.108991820131793					brown		HIBADH
DNMT1				0.905360008382105	0.852066985040706				-0.00601965	-0.0678485				brown	brown	DNMT1
GFPT1				0.907141591615859					0.19568841869324					brown		GFPT1
PPP4R3B				0.975709876390876	0.934921326714363				0.101426066738746	-0.051452				brown	blue	PPP4R3B
STAT1				0.858965670840193	0.897689164457949				0.156780375715616	0.00292216546030067				yellow	blue	STAT1
CSNK1D				0.865665162598553	0.913137947623339				0.20563393397905	-0.0667223				brown	brown	CSNK1D
MBTPS1				0.965233298023466	0.934253342447321				0.0285724780982425	-0.0566236				brown	blue	MBTPS1
FXR1				0.983069902157257	0.633835375131974				0.122830193402765	-0.162418				brown	blue	FXR1
STAT6				0.895576984450742					0.0570060103411405					brown		STAT6
HK1				0.845629683134303	0.860677666751838				0.0817683137820022	0.096548704667181				brown	brown	HK1
RIOK3				0.921824268564241	0.831633646473295				-0.0495396	-0.162821				brown	blue	RIOK3
ERN1				0.888304451813714	0.928511491061621				0.0250781793491299	-0.0483801				brown	blue	ERN1
DDX6				0.979175231625595	0.935661063538239				0.0769816907398262	0.117407343769226				brown	blue	DDX6
NT5DC1				0.933702112390725	0.698704645606172				0.202593868661034	-0.00354189				yellow	blue	NT5DC1
NSUN2				0.580254009106545					0.141961035203596					blue		NSUN2
ERO1A				0.612108564879629					0.0019699640169832					blue		ERO1A
SPOP				0.918147475369247	0.775709177688746				0.19941912327827	0.0334661626266134				brown	blue	SPOP
KPNB1				0.953480599689898	0.920530297380676				-0.0591631	-0.0370792				brown	blue	KPNB1
MAP2K3				0.579482578965173					-0.11593					brown		MAP2K3
CAPRIN1				0.933256436059248	0.869387469106032				0.056821187898036	-0.160858				brown	blue	CAPRIN1
AHCYL1				0.865836456838972					0.078240486568549					brown		AHCYL1
ARID4A				0.894986266126368	0.922900234164457				0.135709871613015	-0.0150248				yellow	blue	ARID4A
SERPINA3				0.689900414372834					-0.175653					blue		SERPINA3
ARFGAP1				0.6226421562684					0.0909391731381454					brown		ARFGAP1
MAX				0.924871738862115	0.924132559138803				0.062967341890842	-0.0797011				brown	blue	MAX
IRF3				0.73137483104616	0.892519614117165				0.251602427724234	0.149134346097247				turquoise	brown	IRF3
HSD17B4				0.898161141230491					0.0692589245334564					brown		HSD17B4
ATG4B				0.853376563555346					0.23236940725904					brown		ATG4B
CREB1				0.936552720000439	0.93320190869937				0.15564073101973	0.0766313165350981				brown	blue	CREB1
FLOT1				0.846528936673612					0.0173151847650092					brown		FLOT1
TGFBR1				0.745208009134632					0.139643926885727					brown		TGFBR1
STK17A				0.69523999958603	0.959927780527898				0.263607057263595	0.119723434575521				brown	blue	STK17A
ZBTB1				0.971220865548932	0.818618144120331				0.216565795136631	0.049290734728006				yellow	blue	ZBTB1
PDCD4				0.862252461564188	0.96310957555053				0.243084097204452	0.0720843355236411				brown	blue	PDCD4
POLR2A				0.86134038673385					0.0374481141002428					brown		POLR2A
QTRT1				0.640783321127962					-0.047405					brown		QTRT1
CNOT6L				0.860871350662801	0.953287708864094				0.223439057813699	0.0263349579932843				brown	blue	CNOT6L
MAP3K7				0.947142691839089					0.0322820493107892					brown		MAP3K7
SPPL2A				0.956075917089663	0.846995510615758				0.146217437258417	-0.0691024				brown	blue	SPPL2A
SNRNP200				0.84849167902642	0.921916147153204				-0.077143	-0.00358473				brown	brown	SNRNP200
MGLL				0.803150479386089					-0.0748302					yellow		MGLL
SYNCRIP				0.958936085632651					0.0145753371093493					brown		SYNCRIP
DYNC1I2				0.925026152097943					0.164677943291426					brown		DYNC1I2
CSNK1E				0.850623262485849					0.117314424827445					brown		CSNK1E
BCL2L1				0.912388025439157	0.730548067588583				-0.0121797	0.0331241652891858				brown	blue	BCL2L1
TNFRSF1A				0.908543299172912					0.10485957330838					brown		TNFRSF1A
TBK1				0.869213421894344					0.0922300134710668					brown		TBK1
PANX1				0.612137496565851					0.124018340844145					blue		PANX1
SLC20A1				0.653462057814403	0.801807181638127				0.175900641449896	-0.0366124				brown	blue	SLC20A1
HIPK1				0.819077060835166	0.893607839597117				0.157882976842591	-0.0566337				brown	blue	HIPK1
ZBTB7A				0.420657934839424					0.00714289801106064					yellow		ZBTB7A
NFKB2				0.554445199104586					0.179155149932452					blue		NFKB2
PRKAA1				0.920561672144842					-0.0213252					brown		PRKAA1
HADHB				0.831856287320407					0.0155922517456633					yellow		HADHB
SHC1				0.720140449359426					0.0214562703116574					brown		SHC1
IMMT				0.8717062223052					-0.184422					brown		IMMT
CXXC1				0.86983382144137					-0.06944					turquoise		CXXC1
DAPK3				0.392738634392548					0.190419732398019					brown		DAPK3
MKNK2				0.403763915006978					-0.25147					blue		MKNK2
ARHGEF1				0.703924890019518	0.971501920583668				0.0559223269234267	-0.00973946				brown	brown	ARHGEF1
MAP2K1				0.749232860533088	0.835858389638293				0.059133125502675	-0.0971736				brown	blue	MAP2K1
BTN3A1				0.348305799850691	0.944368488675263				0.349912419154181	0.0877366907127545				turquoise	blue	BTN3A1
PTBP1				0.845510945984092					0.231373900736425					yellow		PTBP1
YTHDF3				0.945980208702328					0.0768258862370175					brown		YTHDF3
BRD9				0.747289601522735					0.0066152431277353					brown		BRD9
MAPK6				0.853457984610705					0.174241194141718					brown		MAPK6
GPR107				0.942128092766091					0.266265607001176					brown		GPR107
PKN1				0.606914616245533					-0.088383					turquoise		PKN1
TGFB1				0.529644808230756	0.59085134249704				0.151003828533344	-0.0445328				turquoise	blue	TGFB1
POLD4				0.750101187281854					-0.320502					turquoise		POLD4
XPNPEP1				0.658106422556061					0.238339202700081					yellow		XPNPEP1
PSEN1				0.92207028845778	0.766110810703365				0.187287079159649	-0.0269676				brown	brown	PSEN1
WNT2				0.354792937457435					-0.146243					blue		WNT2
STK4				0.934594449576776	0.980007470295824				0.0980214195694959	-0.0256657				brown	blue	STK4
RBBP4				0.93430666908389					0.00445271701684304					brown		RBBP4
RPS6KB1				0.891071706495349					0.11213157820658					brown		RPS6KB1
IPO5				0.653767816407228					-0.0454224					yellow		IPO5
MALT1				0.649534119796638	0.935210345695891				0.308159618384417	-0.0166972				brown	blue	MALT1
RXRA				0.688355709322645					0.158215591231439					yellow		RXRA
OXSR1				0.921259440912446					0.130778576459404					brown		OXSR1
PSMD14				0.866299650758679					0.0027931335261614					brown		PSMD14
NGLY1				0.899243709694334	0.927003057763812				0.0041697557161641	-0.00624385				brown	blue	NGLY1
CPT1A				0.894190668459603					0.0658356686037682					yellow		CPT1A
NUDT3				0.431268571708901					-0.123402					turquoise		NUDT3
BIRC2				0.876390268619272					0.0546808839163269					brown		BIRC2
MAVS				0.815705951871363					-0.0496467					brown		MAVS
YWHAG				0.658252066521265					0.00334817072846749					brown		YWHAG
CLK4				0.850261822696439					0.0812789471173034					yellow		CLK4
SMARCD2				0.52123390165855					-0.108834					yellow		SMARCD2
DAP3				0.881676618288603					0.0595148118924992					brown		DAP3
MAFK				0.421868061690524					-0.0129632					brown		MAFK
ZC3HAV1				0.87061910132593	0.96431261856086				0.142493338357789	0.094123707344291				brown	blue	ZC3HAV1
HSD17B7				0.397703222497381					0.00575898274908075					turquoise		HSD17B7
HADHA				0.883829966788954					-0.111191					brown		HADHA
SMC1A				0.760681221463333					-0.187812					brown		SMC1A
INPPL1				0.889409069769151					0.0285802305032689					turquoise		INPPL1
YTHDF1				0.525217309838848					0.136445526580276					turquoise		YTHDF1
PLOD3				0.728416226106516					-0.0289468					turquoise		PLOD3
NBN				0.769494674868121					0.0682694751403863					brown		NBN
STK25				0.892713571648711					-0.0064574					turquoise		STK25
COG4				0.820192939551237					0.0624190003483847					turquoise		COG4
DPP8				0.925910294674919	0.938101135005657				0.0617801513280832	0.0381458993253376				brown	blue	DPP8
FNTA				0.829604612217633					0.122844176905532					brown		FNTA
PNKP				0.521635301125018					-0.0634497					brown		PNKP
MAN1B1				0.487985110025758					0.169907951103824					yellow		MAN1B1
PYGL				0.368847684897835					-0.233172					yellow		PYGL
RARA				0.559381349862193					0.0325142155119049					blue		RARA
OSR1				0.146486526783544					0.0894012952637981					brown		OSR1
GCN1				0.786170490051476					-0.102104					brown		GCN1
HSF1				0.527769825696936					-0.148108					brown		HSF1
XIAP				0.926877737608828					0.10737821455556					brown		XIAP
RAB5A				0.878249389488403					0.202486243892106					brown		RAB5A
SEC22B				0.749252709504087					-0.257447					brown		SEC22B
CDK9				0.750261183777503					-0.210054					turquoise		CDK9
MLLT1				0.703930449261324					-0.0214941					brown		MLLT1
NCK1				0.862641322816348	0.869641400464627				0.190530851059702	0.215686409541882				brown	blue	NCK1
ANO1				0.491587103811107					0.243569367482386					yellow		ANO1
ATP6V1C1				0.858048953602626					0.0505027849702464					brown		ATP6V1C1
STK35				0.613938274330446					0.233809272658238					brown		STK35
TRAP1				0.754772945466893					-0.107559					brown		TRAP1
OTUB1				0.734179334435174					-0.168585					turquoise		OTUB1
BIN3				0.756210057438439					0.0414594252633075					yellow		BIN3
MACROD1				0.458333583534002					0.0464034890082893					turquoise		MACROD1
KDM5C				0.698267768948188					-0.0439216					brown		KDM5C
AKT2				0.843103948231322					0.0657432258816843					brown		AKT2
PITRM1				0.750532543613254					0.137192556502931					brown		PITRM1
VPS4B				0.791742307737808					0.025086502662923					yellow		VPS4B
CLCN3				0.853381253598241					0.249896572543489					brown		CLCN3
MKNK1				0.848443421669973					-0.0100183					brown		MKNK1
PI4KB				0.783261782063264					0.15437932704306					brown		PI4KB
ITPK1				0.741030991959751					-0.0229999					brown		ITPK1
GART				0.742950673099745					-0.179723					brown		GART
DVL3				0.321529431847382					-0.123691					yellow		DVL3
GNAI3				0.736757604249446					0.212548458183626					blue		GNAI3
PARP12				0.484567622463352					-0.145556					yellow		PARP12
PFKL				0.802271278643753					0.0762720381657163					turquoise		PFKL
CTPS1				0.528025902198306					-0.309561					brown		CTPS1
MAP2K2				0.899597618203096					-0.0225244					turquoise		MAP2K2
MAP2K7				0.816678148546521					-0.203169					turquoise		MAP2K7
ALDH18A1				0.268925042302529					0.343937705901875					turquoise		ALDH18A1
EIF2AK4				0.866650478968434					0.0596786423506762					brown		EIF2AK4
UBA1				0.815479199204743					-0.0213461					brown		UBA1
HSPA4				0.892823566500753					0.0803991885365336					brown		HSPA4
BCL2L11				0.309025250931289					0.413546946105362					turquoise		BCL2L11
IFNAR1				0.813562402271474					0.140789323805488					brown		IFNAR1
LTBR				0.675426915528234					0.0183847815523876					yellow		LTBR
BRD7				0.843461297856982					0.0800704965824947					brown		BRD7
TXNDC11				0.849755126757052					0.145434403576362					yellow		TXNDC11
RAP2A				0.244717766065355					-0.220427					yellow		RAP2A
CASP8				0.380047385869285	0.960840533716572				0.0257620680437572	-0.0774495				turquoise	blue	CASP8
TFDP1				0.59408646429764					0.0142709277758443					brown		TFDP1
ATIC				0.231387037848545					-0.274077					brown		ATIC
PGR				0.426725313814601					0.197728563088277					brown		PGR
CRBN				0.738617779520662					-0.0125738					yellow		CRBN
SAE1				0.487580145585593					0.219479114986395					turquoise		SAE1
SRPK1				0.589099522805998	0.803990447345309				0.11021401003106	0.0425673044565239				yellow	blue	SRPK1
DDX1				0.845502505025106					-0.0027665					brown		DDX1
CARM1				0.482072975602765					0.248426676161148					turquoise		CARM1
CCNT1				0.737111268803148					-0.0720175					brown		CCNT1
ACVR1B				0.768570216027939					0.181425655976073					brown		ACVR1B
DDB1				0.81997965124462					0.0173690599215731					brown		DDB1
JOSD1				0.577798529409173					-0.0730463					turquoise		JOSD1
UBA5				0.861721801016025					0.223083349614168					yellow		UBA5
TRIM28				0.745878319089579					-0.0367302					turquoise		TRIM28
SGPL1				0.783385825082652					-0.030494					brown		SGPL1
GTPBP4				0.620725390354864					-0.16818					brown		GTPBP4
ELAVL1				0.853216355498679					0.132052966299705					brown		ELAVL1
PIK3R4				0.513211767626689					-0.117664					yellow		PIK3R4
RECQL				0.263674516947567					-0.193056					yellow		RECQL
GSR				0.313340624541293					-0.00701125					brown		GSR
AP2A1				0.75724352545597					0.103536241361934					brown		AP2A1
NMT1				0.881099726662503					0.0352692324312996					brown		NMT1
PDPK1				0.609309185108039					0.0955513338749997					yellow		PDPK1
SREBF1				0.836146832486882					0.0987942683623337					turquoise		SREBF1
SIRT1				0.328188484751351					0.119043289766591					turquoise		SIRT1
SLC27A1				0.821724225853689					0.0633157964985873					turquoise		SLC27A1
EPN1				0.481323432603926					-0.00869622					turquoise		EPN1
CDC42SE1				0.619301562035797					0.164381004604349					brown		CDC42SE1
PLOD1				0.64848291639781					0.0632707485845143					turquoise		PLOD1
CCAR2				0.635807556382756					-0.39956					turquoise		CCAR2
PMS2				0.708822443887363					-0.154115					turquoise		PMS2
ARAF				0.454883786991973					-0.268598					turquoise		ARAF
WDR5				0.61178145833187					-0.0668719					turquoise		WDR5
PGGT1B				0.326325954003201					0.100676065596428					yellow		PGGT1B
GPAT4				0.589571600617872					0.0966069914682448					brown		GPAT4
POLG				0.508279552455458					-0.260889					brown		POLG
ZBTB17				0.650181145510576					-0.145387					turquoise		ZBTB17
CASP7				0.265410495933387					0.0126657075220016					yellow		CASP7
DUSP22				0.696684398136338					0.183691059923364					brown		DUSP22
ACOX1				0.754042060304003					0.15423210547284					brown		ACOX1
RNF4				0.911692258870492	0.81558463780514				0.102776701927363	0.000172128256521832				brown	blue	RNF4
CHCHD6				0.426862737201954					0.231408540353177					brown		CHCHD6
IFNGR2				0.637997264965193					0.34850021561299					yellow		IFNGR2
CERK				0.567615204332395	0.839989444604399				0.00457801956527875	0.133250508545973				brown	brown	CERK
ALDH3A2				0.436879288113483					0.126306750147687					brown		ALDH3A2
OSBP				0.712811916977392					0.103880027255056					blue		OSBP
C1GALT1				0.423986724248916					0.154726513451728					yellow		C1GALT1
SLC11A2				0.857561751572144					0.214688584799488					yellow		SLC11A2
PRKAG1				0.344361777287804					-0.179525					turquoise		PRKAG1
SLC9A1				0.433913277883331					0.273049161333736					blue		SLC9A1
PARP1				0.629445541670022					-0.20947					turquoise		PARP1
GGCX				-0.0551644					-0.326188					brown		GGCX
PTGR1				0.776550627067623					-0.00501332					yellow		PTGR1
GTF2A1				0.378260042786551					0.185572436100928					brown		GTF2A1
ATF1				0.492903504688476					0.231417505022188					brown		ATF1
CLK3				0.601163669597081					-0.0487831					turquoise		CLK3
NEK4				0.120825570111315					-0.0303558					brown		NEK4
CAPN1				0.665479149097837					0.0886701673695038					turquoise		CAPN1
ESYT1				0.517691789724153					-0.115054					turquoise		ESYT1
OGFRL1				0.443009519928695					0.076975679193543					turquoise		OGFRL1
WDR48				0.596900587737645					0.168764545370773					brown		WDR48
AP1B1				0.368638071967771					-0.0731228					brown		AP1B1
KDM1B				0.280396369281195					0.219934673459022					turquoise		KDM1B
STARD3				0.659246322032558					0.0135990113340087					turquoise		STARD3
HDAC2				0.593476197867274					0.00362828476860953					brown		HDAC2
PI4K2A				0.314515858586515					0.24330215194583					turquoise		PI4K2A
METAP1				0.515364386537727					0.0852333988883943					blue		METAP1
LYPLA1				0.563518018711081					0.119895518972542					blue		LYPLA1
DCUN1D1				0.75225525598169					0.0305538951763503					yellow		DCUN1D1
FDFT1				0.516729129202592					-0.110646					turquoise		FDFT1
SPAST				0.446833266865071					0.184977598821694					yellow		SPAST
SRC				-0.0689986					0.324367269166272					brown		SRC
GRK4				0.639392457203827					0.247804433757793					yellow		GRK4
IVD				0.703531694383252					-0.0602667					brown		IVD
ERAP1				0.630392300649781					-0.184039					blue		ERAP1
AKT1				0.741460602724387					0.0438037260366642					turquoise		AKT1
BACE1				0.380101549888517					0.316640121144049					turquoise		BACE1
L3MBTL3				0.303528579172146					-0.216221					brown		L3MBTL3
TMTC3				0.636914028185936					0.0476973934887697					yellow		TMTC3
VPS35				0.527220422579254					-0.0112153					brown		VPS35
ERCC3				0.803955260177984					0.0809095114758132					brown		ERCC3
SMNDC1				0.591650713151345					-0.335411					turquoise		SMNDC1
CBX5				0.899000067017131					0.120477791706021					brown		CBX5
TAB3				-0.0758585					0.20718404641778					brown		TAB3
AASDHPPT				-0.18323					-0.0233153					brown		AASDHPPT
GLB1				0.809247245157105					0.258597660168698					yellow		GLB1
STARD7				0.456863902462564					0.0186179715503215					turquoise		STARD7
KAT8				0.732603281794887					-0.0810837					turquoise		KAT8
GGT7				0.609431855370175					-0.148676					yellow		GGT7
HAT1				0.626486980814237					-0.0758042					brown		HAT1
METTL3				0.543988268510937					-0.0636345					yellow		METTL3
UBA3				0.873886197184759					0.0950073568091309					yellow		UBA3
CTDSP1				0.479744266604346					-0.210377					brown		CTDSP1
DCUN1D5				0.598799437366644					-0.0561528					brown		DCUN1D5
PANK3				0.705407471131512					-0.0957882					brown		PANK3
ZMPSTE24				0.104781873331419					0.150367956643736					brown		ZMPSTE24
SUPV3L1				0.432905409722854					-0.161115					brown		SUPV3L1
HDAC1				0.458956218652811					0.0298164225437787					turquoise		HDAC1
ALKBH3				0.446636696054466					-0.166005					turquoise		ALKBH3
SLC33A1				0.605986161945808					-0.192668					yellow		SLC33A1
RPA1				0.416476978308732					0.210002913930756					yellow		RPA1
HDAC3				0.483765847318371					-0.00877037					blue		HDAC3
SF3A3				0.687412085272238					-0.0883668					brown		SF3A3
TRAF3IP2				0.0912279661715768					-0.181652					brown		TRAF3IP2
LGALS8				0.434952985138277					0.115486421253283					brown		LGALS8
PRKAB2				0.0153946441592202					-0.306253					brown		PRKAB2
VRK3				0.411364529795199					0.238918302199848					brown		VRK3
FEM1B				0.0477743998743225					-0.290207					brown		FEM1B
CHUK				0.295919121291052					0.0157947950826392					blue		CHUK
NAE1				0.65430490237488					-0.138832					yellow		NAE1
HIF1AN				0.479731931631924					-0.11766					turquoise		HIF1AN
MAPK9				0.765871746365201					0.319091928247138					yellow		MAPK9
APH1B				0.508235463188167					-0.134882					brown		APH1B
EIF2AK1				0.625328566933546					-0.0133361					brown		EIF2AK1
BRCC3				0.141857752864495					-0.24084					blue		BRCC3
IL10RB				0.429591401281757					0.253174009855207					brown		IL10RB
EED				0.546190449301097					0.36092906871245					yellow		EED
ERI1				0.42610545116371					0.0217188552319933					turquoise		ERI1
ARHGAP1				0.48242902631637					0.234651879033499					yellow		ARHGAP1
ALKBH1				0.401403906244361					-0.175618					brown		ALKBH1
KLRK1					0.879946379176088					-0.0470915					blue	KLRK1

## Sheet: Table S6(ExposureA_W_ssgsea)
Table S6：Exposure A in the SSGSEA of WGCNA data(Training set）
sample	Endothelial_cells__ExpoA_ssGSEA	Epithelial_cells__ExpoA_ssGSEA	Macrophage__ExpoA_ssGSEA	Smooth_muscle_cells__ExpoA_ssGSEA	B_cell__ExpoA_ssGSEA	DC__ExpoA_ssGSEA	Fibroblasts__ExpoA_ssGSEA	Monocyte__ExpoA_ssGSEA	NK_cell__ExpoA_ssGSEA	T_cells__ExpoA_ssGSEA	Tissue_stem_cells__ExpoA_ssGSEA	ExpoA_ssGSEA_MEAN	ExpoA_ssGSEA_MAX
GSM3660641	2.03808	0.818576465027008	3.83001055467935	0.0137807229812063	-0.663268	0.697381027204999	-0.137651	-0.987472	0.581338758807341	0.0162889175091577	1.1533613775503	0.669129805782316	3.83001055467935
GSM3660642	2.5319204445586	1.54222740815632	4.35642819700052	-0.36335	-0.69273	0.303074847050978	-0.0722559	-1.05727	0.10427388437943	0.744772394762854	0.736171495393342	0.73938761664863	4.35642819700052
GSM3660643	2.50454819618675	1.48648808904452	4.22093383461534	0.6354557598704	-1.01398	0.378783698114971	0.125123089514833	-1.29604	0.276291012917604	0.39638914172734	0.551749700768833	0.751431646791444	4.22093383461534
GSM3660644	2.76987523359652	1.6669062927836	4.57810321978977	0.328899921808309	-1.29642	0.638802192342534	0.126348710294714	-0.921214	0.789216369664161	0.196037843895456	1.14289771828205	0.910859607103706	4.57810321978977
GSM3660645	3.03808	1.81857646502701	4.6225479332147	0.362098910762509	-0.720423	0.59381855549833	-0.000776764	-1.06456	0.390627524093865	0.47505937021283	0.918612892714642	0.948514523578584	4.6225479332147
GSM3660646	2.60407863699284	1.61432447943066	4.29892852765212	0.0798287948396251	-0.694559	0.852288398759768	-0.0857612	-0.67437	0.56238200705523	0.27289338112146	1.36387741701949	0.926719214993016	4.29892852765212
GSM3660647	2.70687688175395	1.71204251865114	4.53609560455463	0.0777842159167069	-1.38713	1.17652922248107	-0.203012	-0.69688	0.410978282856193	-0.0629305	1.55174970076883	0.892918118768972	4.53609560455463
GSM3660648	2.74796085823904	1.7076277201489	4.47362632263465	-0.204587	-0.851428	0.960651940202877	-0.253824	-0.322639	0.322310558411283	-0.255228	1.20392411244045	0.866217824481798	4.47362632263465
GSM3660652	2.67360937602105	1.73053399374044	4.63952635898059	-0.056682	-0.387134	1.18022945879788	0.17702177089084	-0.355896	0.506760795707053	0.123722125908054	1.40133924700567	1.05754831674136	4.63952635898059
GSM3660653	3.01661849789953	1.60599162673397	4.83001055467935	0.241300665139943	-1.20592	0.638918788733208	0.336329957118745	-1.02938	1.10427388437943	0.0596920452402634	1.52407894685918	1.01108313267623	4.83001055467935
GSM3660654	2.86417223567291	1.61703669494611	4.48716106270683	-0.364544	-0.671649	0.695488058024071	0.475334540510158	-0.79875	0.805502108320713	0.249966938740816	1.54177186547712	0.991044611088856	4.48716106270683
GSM3660655	2.85274435261116	1.72609005298556	4.55589161634601	-0.229237	-0.823768	1.06543523469769	0.117212693173651	-1.09927	0.634448173555418	0.150158415420914	1.38028800397282	0.939089893039623	4.55589161634601
GSM3660656	2.86711847215346	1.63580651208641	4.5070087668203	-0.270461	-0.440055	0.180229458797884	0.746175928652665	-1.32264	0.800478295340754	-0.0962955	1.50291529807804	0.919116670722439	4.5070087668203

## Sheet: TableS6(Exposure A_TSET_SSGSEA)
Table S12: Exposure A in the SSGSEA of Testing set
sample	B_cell__ExpoA_ssGSEA	Endothelial_cells__ExpoA_ssGSEA	Epithelial_cells__ExpoA_ssGSEA
GSM3891623	6.16048295776917	9.58357953162686	9.1227248907026
GSM3891625	5.77610511329199	9.46341812715762	8.88019943920845
GSM3891627	5.75146156864002	10.2524715373475	8.98024593728573
GSM3891629	6.52179123303739	10.4634181271576	9.19811851219019
GSM3891631	5.52179123303739	9.5783877549053	8.19811851219019
