# Supplementary material
Source: Research Square preprint supplement (doi:10.21203/rs.3.rs-9392286/v1)
Supplement: Supplementary file 16 [file ad2d6e8c122412241737025b.xlsx]

## Sheet: Sheet1
Table S1: The Candidate Human Protein Targets Predicted by NNK Using ChEMBL, SwissTargetPrediction and PharmMapper
	gene
1	UPB1
2	UCK2
3	NAA16
4	SULT1A1
5	RXRG
6	SLC2A3
7	TAB1
8	OSBP
9	USP4
10	PTP4A2
11	SLC27A1
12	MAP3K21
13	NSUN6
14	NAPRT
15	LOXL3
16	CRBN
17	GID4
18	IKBKE
19	PSMB3
20	QSOX1
21	FKBP4
22	FUT3
23	RXRA
24	ZCWPW1
25	UGT1A4
26	PHF13
27	BAK1
28	RPN1
29	ALDH3A1
30	KCNQ3
31	OGFOD1
32	FAS
33	SPTLC1
34	TLR1
35	ID1
36	HM13
37	SOD1
38	TUBA1A
39	CLEC4E
40	SLC18A3
41	PIM1
42	SLC2A1
43	GRK4
44	FFAR1
45	PLK1
46	PRDX4
47	TUBA4A
48	HADHA
49	SGK1
50	RAB29
51	GABRB3
52	KAT6A
53	SLC43A1
54	LIN28A
55	MAVS
56	CHRNB4
57	DAP3
58	CDK4
59	SMYD3
60	NUDT3
61	PPARG
62	BST1
63	TESK1
64	KCNMA1
65	KYAT1
66	LPAR4
67	PSEN1
68	DRD3
69	MRGPRX1
70	BRD1
71	WNT2
72	BRCC3
73	RNASEL
74	MAPK13
75	GALR1
76	HSPA1L
77	EIF3F
78	PRSS1
79	CCL22
80	PIK3C2A
81	SLC14A1
82	EIF3I
83	LAMTOR3
84	TMX1
85	VEGFA
86	PDE3B
87	IL1RN
88	PI4K2A
89	AURKB
90	DOT1L
91	PKN1
92	TYMS
93	ADCY4
94	CASP10
95	PTN
96	YAP1
97	CCR8
98	CNOT6L
99	POLD1
100	GABRA4
101	CERS4
102	SF3A3
103	TXNRD3
104	HDAC3
105	VHL
106	CTNNB1
107	COG4
108	CNOT9
109	SUMO2
110	LAMB1
111	RPS6KA4
112	PIEZO1
113	GRK1
114	NIPSNAP3A
115	MAPK3
116	KCNK13
117	VCPIP1
118	ROCK1
119	FGFR1
120	BRCA1
121	ADRA1A
122	NPR3
123	UGT1A1
124	CYP4F2
125	ALK
126	CACNA1S
127	STIP1
128	FMO3
129	HEXIM1
130	SUV39H2
131	CCND1
132	XCR1
133	ADPRS
134	ADRB1
135	CHRNB2
136	EBP
137	ADH4
138	IGSF11
139	MTOR
140	PLIN5
141	NSD2
142	TBK1
143	NTRK1
144	PIP5K1B
145	MLLT1
146	DUSP4
147	SUMO1
148	PTPN4
149	BCL2L1
150	SENP8
151	DCXR
152	PLAAT4
153	MMP17
154	RSL1D1
155	EGFR
156	POT1
157	STK4
158	SCN8A
159	SPOP
160	GSTM3
161	EWSR1
162	PEAK1
163	SCNN1B
164	BRD7
165	CDK9
166	HIF1AN
167	CEPT1
168	MMP2
169	KDR
170	MDM2
171	RACGAP1
172	PDCD1
173	SIRT3
174	BMP4
175	LARGE1
176	RAF1
177	CTPS1
178	AK1
179	PRMT8
180	CAPN1
181	NEK1
182	PANK1
183	STAT3
184	GLS
185	TAS1R2
186	NBN
187	PBRM1
188	TAC3
189	PRKAA2
190	MGAT3
191	MAPK12
192	CDK18
193	CDC25C
194	KMT5B
195	SCN5A
196	DUSP1
197	MED23
198	MAST1
199	TEAD3
200	TAS2R4
201	MRE11
202	RPS6KA3
203	EEF1B2
204	PNPLA2
205	NR4A2
206	ICOSLG
207	NOS1
208	PRKDC
209	LIMK2
210	CXXC1
211	GABRB2
212	ULK3
213	PEBP1
214	AKR1C2
215	PGRMC1
216	GJB1
217	BRWD1
218	KCNJ5
219	FGD1
220	STAT1
221	PKN3
222	QDPR
223	KDM5D
224	L3MBTL4
225	PLA2G15
226	OARD1
227	CCT5
228	CACNA1B
229	SMC1A
230	ADHFE1
231	SLC2A4
232	PIK3CB
233	PGGT1B
234	EIF5A
235	BIRC2
236	KCNN1
237	CDK3
238	FN3KRP
239	ENPP1
240	GRIN2B
241	RNF31
242	HIPK4
243	ABCC8
244	SLC6A15
245	FXR1
246	PRTN3
247	GLOD4
248	DUSP14
249	PADI4
250	FKBP1A
251	KCNA1
252	FFAR4
253	LTC4S
254	MYLK4
255	EIF2S1
256	ADRM1
257	LPCAT1
258	CAPRIN1
259	SGK3
260	CYP4X1
261	SCNN1A
262	CYP27B1
263	BAP1
264	ITGA1
265	SLC6A4
266	XIAP
267	SLC40A1
268	NT5DC1
269	XBP1
270	PINK1
271	SULT2B1
272	PAN3
273	BMP6
274	NTN1
275	DAPK1
276	KCNN3
277	SLC27A5
278	PRSS3
279	CALCA
280	NTHL1
281	XPNPEP1
282	UBLCP1
283	PIK3C2B
284	HAO1
285	ABHD11
286	HYAL1
287	BRD4
288	SLC27A2
289	MGST1
290	PDE1B
291	FABP4
292	CDK1
293	LGALS4
294	DCPS
295	IFIH1
296	B3GNT2
297	ADAL
298	HIF1A
299	SRC
300	TARS1
301	MARK1
302	TPM3
303	SDCBP
304	HMGCR
305	UBE2D3
306	EIF4EBP1
307	HINT1
308	CFL1
309	PDE8A
310	MAP4K3
311	VPS35
312	CYSLTR1
313	CLK3
314	ATIC
315	PPIP5K2
316	ETV1
317	IRGM
318	CDK5R1
319	AURKC
320	P2RY12
321	KCNH1
322	CHST4
323	HES1
324	GZMM
325	MAPT
326	PDE6D
327	PRDM16
328	NSD3
329	CERS2
330	PEF1
331	HSPA4
332	PDE5A
333	CYP24A1
334	B3GALT1
335	PSMB2
336	MAP3K7
337	ATR
338	GABRG2
339	HCAR1
340	HDAC1
341	KMO
342	PDE4C
343	TSSK1B
344	MAP2K7
345	PRDX1
346	VIPR1
347	HIPK1
348	CYP27A1
349	KLK1
350	SLC12A2
351	CYP2C19
352	LCK
353	RXFP4
354	SORT1
355	MAPK7
356	MED25
357	LPAR3
358	SNX3
359	MYT1
360	MCL1
361	GATD3
362	RARA
363	CYP2E1
364	ABCC2
365	JAK1
366	KDM4C
367	HCN3
368	SCN1A
369	ABL1
370	CACNA2D1
371	CACNA1C
372	ITPK1
373	EPHA7
374	RPSA
375	SIK1
376	GSTK1
377	RAMP2
378	TRPM5
379	LIG4
380	ENTPD1
381	TLR2
382	GPR151
383	GRIN1
384	AKT1S1
385	TNKS
386	ALPP
387	PSME3
388	TAS1R3
389	PI4KB
390	DBF4
391	HSD17B3
392	RIPK2
393	OXSR1
394	BMI1
395	IPO5
396	TNS3
397	CCR7
398	HNRNPD
399	JUN
400	ACER2
401	PRKAB2
402	SLC34A3
403	SF3B3
404	PYCR1
405	TGFB1
406	DAPK2
407	STAT6
408	SLCO4A1
409	SLC16A8
410	TAS2R14
411	SLC11A2
412	BCL3
413	SFN
414	IRS1
415	ARNT
416	METAP1
417	CYB5R3
418	ITPKA
419	SMURF1
420	NR4A3
421	NPBWR1
422	SOS1
423	DNMT3A
424	TACR1
425	TXNRD1
426	PDE6C
427	HSD17B10
428	KCNK4
429	SPPL2B
430	GPR27
431	SLC1A5
432	TMPRSS4
433	EDF1
434	KAT8
435	SRCIN1
436	PTPRZ1
437	CKS1B
438	STK32C
439	GSTM1
440	PTGS2
441	GABRA1
442	TRAV29DV5
443	KDM5B
444	LIN28B
445	CASP8
446	XPO1
447	PKM
448	CNR1
449	GRIK2
450	RASGRP1
451	KCNJ4
452	HAAO
453	CCR2
454	RHOA
455	ENO1
456	HTR3A
457	DAB2IP
458	RIOK1
459	ECE1
460	RARB
461	REEP5
462	ERCC1
463	PAK1
464	GRIK1
465	RXRB
466	MMP7
467	OPRK1
468	IP6K1
469	COL1A1
470	MMP13
471	FOXO1
472	PLK4
473	PRDX2
474	CRY2
475	APOA1
476	CD207
477	AMPD1
478	CLEC4M
479	CUL1
480	DPP3
481	SLC26A4
482	PABPC4
483	SBK3
484	TSSK3
485	ITPR1
486	GYS1
487	CHD1
488	NR2E3
489	DDAH1
490	UGT1A3
491	PARP1
492	GPR6
493	CCL2
494	ACOT1
495	OGFRL1
496	PSMB6
497	AOC1
498	EPHB3
499	TEAD2
500	PDE4A
501	DVL1
502	ECHS1
503	CDK16
504	TRPV2
505	ARF1
506	CCL5
507	RBBP9
508	TRPM7
509	EHMT2
510	POU5F1
511	USP1
512	NMT1
513	KPNA2
514	ITGA2B
515	KCNC1
516	HK1
517	SUPV3L1
518	RBPJ
519	GNAI1
520	AGPAT1
521	ENOX2
522	CAMK1
523	PIK3CG
524	WASF3
525	NFE2L2
526	KLK4
527	IGF1R
528	KIF22
529	OPN1LW
530	JAK3
531	CGAS
532	GOT1
533	YTHDC1
534	MAPK8
535	MARK3
536	UGT1A9
537	SPHK1
538	GFPT1
539	DNASE1L3
540	CCR6
541	PRKAG1
542	PTEN
543	ACER1
544	SMAD2
545	ST3GAL1
546	NOTCH4
547	CHRNB1
548	BTN3A1
549	TRAP1
550	GAPDH
551	NUAK1
552	PLCG2
553	PAK3
554	BIRC3
555	EIF4E
556	BRD2
557	LRRFIP1
558	YBX3
559	DCUN1D2
560	PIK3C3
561	PPP1R15B
562	SIX1
563	WNK3
564	HSF1
565	KCNJ3
566	AMY1A
567	PIK3R1
568	PTH1R
569	PDGFRB
570	RAPGEF3
571	STK25
572	DDR1
573	SLC16A3
574	SRPK3
575	MINK1
576	BCKDK
577	ADCY3
578	ANXA2
579	SCN2A
580	AXIN1
581	PCBP3
582	PLEKHA1
583	ING2
584	SLC22A4
585	GRIA3
586	GCN1
587	BACE2
588	DYRK3
589	NCEH1
590	KCNJ1
591	NSUN2
592	SHH
593	ITPR3
594	ITGB1
595	HDAC2
596	TGM6
597	PGR
598	BRD3
599	UGT1A10
600	FA2H
601	VDR
602	BRD9
603	ENTPD5
604	SLC29A4
605	AHCYL1
606	MASP1
607	ALKBH3
608	SLC25A1
609	DCLK3
610	SLC1A2
611	DNASE1
612	PSAP
613	OXR1
614	CNOT6
615	CFH
616	PRKAG2
617	SHC1
618	PCSK6
619	SLC22A8
620	BCL6
621	ACKR3
622	NR0B1
623	ESRRB
624	TH
625	PI4KAP2
626	NFATC1
627	AR
628	ESRRG
629	STARD3
630	WNK1
631	KLF10
632	UGT2B15
633	ARG1
634	GLP1R
635	CDK11B
636	NFKB1
637	KCNN4
638	EPHA3
639	SRD5A1
640	CSNK1G3
641	PDK2
642	DUSP3
643	ITGAL
644	ESRRA
645	GRM1
646	DEGS1
647	APOBEC3A
648	PDCD4
649	PFKM
650	TPM1
651	SENP1
652	CXCR5
653	BLM
654	FABP3
655	GRIA4
656	ITGB3
657	PIP4K2A
658	CERS1
659	CYBB
660	FLT3
661	KCNQ1
662	EPHB1
663	SLC15A1
664	HSP90AB1
665	CAPN9
666	CD44
667	SETDB1
668	FZD4
669	SMG1
670	CYP3A4
671	ERBB2
672	ITGB2
673	EZH2
674	IL1R1
675	MYLK3
676	CXCR3
677	PTP4A3
678	STK35
679	HPN
680	RAC3
681	HSD11B2
682	MC4R
683	EGR1
684	KIF11
685	AKT2
686	SENP3
687	FAAH
688	POLE3
689	MAP2K1
690	OXT
691	ABAT
692	SLC6A3
693	CX3CR1
694	ANO1
695	PIN1
696	CD4
697	CDK7
698	DRD2
699	GABRA3
700	CASP9
701	TP53
702	KCNH2
703	AKR1C1
704	ITGAM
705	EDNRB
706	HSP90AA1
707	MC1R
708	PAH
709	RYR1
710	ANGPT1
711	KCNJ11
712	PARP12
713	STK38
714	FGF1
715	GHSR
716	FGFR3
717	FLT1
718	VCAM1
719	BRSK1
720	ZBTB7A
721	NAP1L4
722	GRIA1
723	PRDX5
724	PCIF1
725	TUBA1B
726	CCAR2
727	CYP2C9
728	MMP14
729	SIRT1
730	SSTR1
731	SFRP1
732	KDM5A
733	EPHX1
734	YWHAQ
735	YBX1
736	ALYREF
737	MAP2K3
738	AHSA1
739	CNOT3
740	TLR3
741	RBBP7
742	SMYD1
743	EED
744	KIF20B
745	PROKR2
746	CDKL4
747	NR2C1
748	MCOLN1
749	PROKR1
750	DCUN1D1
751	PHGDH
752	NR1D2
753	NR1D1
754	UGT1A6
755	ITCH
756	SERPINA3
757	CFLAR
758	TRPC3
759	FASN
760	GLRA3
761	RAC1
762	NEK3
763	SRSF1
764	HTR1F
765	CALCRL
766	NT5C
767	POLG
768	WDR5
769	CDKN1A
770	ESR1
771	G6PC1
772	SULT1C2
773	PPM1D
774	RORB
775	CES1
776	EHMT1
777	PARP3
778	ATXN3
779	TXNDC11
780	GSTM4
781	SIGLEC7
782	NAT1
783	HMOX1
784	CCNE1
785	MAPK10
786	PANX1
787	FFAR3
788	METTL3
789	FERMT2
790	NPFFR1
791	SGPL1
792	ADGRL4
793	UBA1
794	PSMB1
795	NR1I3
796	TJP1
797	G6PD
798	CHRNA1
799	SAT1
800	POLD4
801	UGT1A8
802	SHARPIN
803	LPAR2
804	PDE1A
805	TDP1
806	VDAC3
807	ST3GAL3
808	PRKD3
809	PHB1
810	FABP1
811	IRAK4
812	WDHD1
813	LTK
814	CHN2
815	EZH1
816	PRKAB1
817	TAF1
818	BCL2
819	RNF4
820	SKP2
821	RUNX1
822	GALR3
823	CD69
824	ABCC1
825	HSPA2
826	PGAM1
827	RAPGEF4
828	GRK3
829	PTDSS1
830	FAF1
831	RORA
832	TRIM24
833	ERCC3
834	SLC36A1
835	C5AR1
836	EXO1
837	CUL5
838	ELK3
839	EPHA4
840	SIRT4
841	ABCB1
842	TDRD3
843	NR3C2
844	HSPA4L
845	TLR4
846	ICAM1
847	GPRC5C
848	PDE6B
849	PLK3
850	GAD1
851	SLC6A11
852	LGMN
853	IL18
854	MDM4
855	ENTPD3
856	BRPF1
857	CD36
858	STARD7
859	SPNS2
860	APAF1
861	TMTC3
862	F2
863	NANP
864	DCAF1
865	IL36G
866	SLC17A2
867	PPEF1
868	DIAPH1
869	STUB1
870	DAG1
871	USP13
872	CLK4
873	FOXM1
874	PARP4
875	ADCY1
876	YEATS4
877	IGFBP4
878	IKBKB
879	MBOAT4
880	ADI1
881	KIF23
882	MTARC1
883	STAT4
884	NT5M
885	CCK
886	MAGI3
887	TENT4B
888	BRPF3
889	GSTA3
890	PCBP1
891	YTHDF1
892	CHRNA3
893	SLC23A2
894	GABARAPL2
895	AKT3
896	PPP6R3
897	RPS27
898	ERN1
899	CYP4F3
900	KCNE1
901	WNK4
902	GRIK5
903	L3MBTL3
904	F2RL2
905	RET
906	CAPN2
907	P2RX2
908	GPR37
909	DUSP22
910	SMAD3
911	UPP1
912	MARK4
913	ATP2A3
914	MGST3
915	GLB1
916	UHRF1
917	TLK1
918	NUDT1
919	MAP3K3
920	SLC47A1
921	PSD
922	RBP4
923	CLCA3P
924	SF3B1
925	STK24
926	FUCA1
927	BMP1
928	S1PR2
929	NET1
930	ARHGEF1
931	KCNJ6
932	EEF1A1
933	DHX36
934	DNPH1
935	TRAF6
936	IRAK1
937	KISS1R
938	TASP1
939	YTHDF3
940	PPME1
941	SCPEP1
942	PRKAA1
943	BAD
944	UBE2D2
945	EPHB4
946	GSTA4
947	KPNB1
948	DNMT3B
949	PIKFYVE
950	MAP4K4
951	SIGMAR1
952	DYNC1I2
953	PDE8B
954	FOXO3
955	TF
956	NEU1
957	TAP1
958	TBKBP1
959	AZI2
960	PPP4R3B
961	THRA
962	CISD2
963	CDH1
964	HIPK3
965	SLCO3A1
966	NEDD4
967	PKP1
968	NPC1
969	SPPL2A
970	HSD17B12
971	NPY1R
972	LMTK3
973	DOCK1
974	MLC1
975	MPG
976	ART1
977	ITGA3
978	NME1
979	AOX1
980	RXFP3
981	LAT
982	PSMG1
983	PTCH1
984	CCNH
985	EIF2AK4
986	LYPLA1
987	KCND3
988	PHLPP1
989	ST14
990	SLC27A4
991	HSPA14
992	OTUD1
993	CAV1
994	PIM3
995	IL1B
996	DDR2
997	SCP2
998	CCR1
999	TRIM33
1000	FOLH1
1001	CYTH3
1002	NTMT1
1003	GPRC5A
1004	KIT
1005	LGALS8
1006	BPTF
1007	SERPINE1
1008	MAP1LC3C
1009	MAFK
1010	GPR45
1011	PITPNM1
1012	TP53BP1
1013	PPARGC1A
1014	PKD1
1015	UBA5
1016	OPN3
1017	MYOF
1018	HPCAL1
1019	COQ8B
1020	TM7SF2
1021	GTPBP4
1022	GPAM
1023	FPR1
1024	SERPINF1
1025	GPR143
1026	MAGI1
1027	MRGPRX3
1028	LTB
1029	ADAR
1030	EPHA2
1031	UGT2B4
1032	CBR3
1033	AIFM1
1034	FNTA
1035	ATM
1036	SULT1B1
1037	MMP11
1038	WTAP
1039	TRPC6
1040	PSMG3
1041	ARHGDIA
1042	GABRR1
1043	PADI3
1044	B3GNT3
1045	HNRNPF
1046	ATF1
1047	NOXO1
1048	ARFGAP1
1049	ACSF3
1050	ELAVL3
1051	HLA-DQA1
1052	EP300
1053	PSEN2
1054	S1PR1
1055	MAN1B1
1056	AKR1C4
1057	ACSS2
1058	SSTR5
1059	GABBR1
1060	MADCAM1
1061	AURKA
1062	NPY4R
1063	CACNA1H
1064	MAPK1
1065	ADRB2
1066	CXCL8
1067	CRABP2
1068	KCNQ4
1069	NR2C2
1070	ADCYAP1R1
1071	ACVR1
1072	NLRP3
1073	ACVR1B
1074	ELOVL3
1075	ERBB3
1076	PRMT3
1077	NISCH
1078	ITGA4
1079	FGFR4
1080	EDAR
1081	NR5A2
1082	COQ8A
1083	TAAR9
1084	SAE1
1085	GSTO1
1086	UBXN11
1087	ATP2A1
1088	BTK
1089	GSTA1
1090	ABO
1091	CARM1
1092	GPER1
1093	COP1
1094	PIP5K1C
1095	IDO2
1096	APC
1097	NTSR2
1098	TRPM2
1099	RIPK1
1100	FAHD1
1101	HPGD
1102	SMARCD2
1103	ORAI3
1104	LATS1
1105	NME4
1106	ROS1
1107	FBP1
1108	GBA1
1109	TUBB3
1110	PEX2
1111	ATP6V1C1
1112	EPHA5
1113	MCHR2
1114	HSD17B1
1115	MAP4K1
1116	PDE3A
1117	S1PR3
1118	SULT1E1
1119	IRAK3
1120	KDM5C
1121	AGT
1122	LTB4R2
1123	TNKS2
1124	PDE4D
1125	FDFT1
1126	PRDX3
1127	TNFRSF9
1128	MMP3
1129	CCKBR
1130	DPP8
1131	TERF2IP
1132	NEIL1
1133	PON3
1134	CASP4
1135	TNK1
1136	AAK1
1137	NEK2
1138	ADAMTS4
1139	MLLT3
1140	SELPLG
1141	FNIP1
1142	HSPA1A
1143	GAB1
1144	KCNMB4
1145	OPRD1
1146	BAX
1147	HSD17B14
1148	P4HA1
1149	SCN4A
1150	FOS
1151	PAPSS2
1152	PIN4
1153	CCRL2
1154	WNT3
1155	PDE11A
1156	DHX32
1157	SERPINA2
1158	ENTPD4
1159	ESR2
1160	HHAT
1161	FUBP1
1162	SLC46A1
1163	PIP4K2B
1164	STK16
1165	DDIT3
1166	HSD17B7
1167	SEPTIN5
1168	CNOT4
1169	SMNDC1
1170	ERBIN
1171	NIT1
1172	PRKG1
1173	GPR68
1174	IMMT
1175	AGTR1
1176	KCNH3
1177	CLCN3
1178	KPNA3
1179	XNDC1N
1180	BCL7B
1181	RPA1
1182	GSDMD
1183	ELOVL2
1184	PI4KA
1185	P4HA2
1186	FUT9
1187	ABCB4
1188	STK3
1189	MAX
1190	NMUR1
1191	ILK
1192	LIG1
1193	KIF5B
1194	MEST
1195	GPT
1196	ATAD5
1197	VRK1
1198	NUDT4
1199	UGT8
1200	SLC23A1
1201	ZNF280D
1202	NAA60
1203	SLC13A2
1204	NEK4
1205	BDH2
1206	PHKG1
1207	FOSB
1208	ALPG
1209	CYP1A1
1210	ALDH9A1
1211	LYPLAL1
1212	DOHH
1213	AQP4
1214	HCAR3
1215	CYP2C8
1216	CD74
1217	FEN1
1218	DLG4
1219	NR3C1
1220	IL4I1
1221	ALDH4A1
1222	AVPR2
1223	NOX4
1224	ADAMTS1
1225	GTF2A1
1226	SLC37A4
1227	TRPM4
1228	NLRP1
1229	DDB1
1230	TAOK1
1231	ESYT1
1232	SCN9A
1233	UBE2D1
1234	TOPBP1
1235	AKR1A1
1236	LOXL4
1237	SLC8A1
1238	WDR48
1239	SMARCA4
1240	LOXL1
1241	YWHAH
1242	CIAPIN1
1243	NHERF1
1244	PTPRJ
1245	FRS2
1246	OTUB1
1247	UGT1A7
1248	PRMT5
1249	DCUN1D5
1250	NOS2
1251	CCNT1
1252	STK32A
1253	PARP15
1254	KCNQ5
1255	OXGR1
1256	FUT6
1257	MLX
1258	ITPKB
1259	LAP3
1260	CA3
1261	SMPD3
1262	GPAT4
1263	NR2E1
1264	BRS3
1265	PBK
1266	PDE4B
1267	CD2
1268	PIK3R4
1269	SNCAIP
1270	ADRA2A
1271	MMEL1
1272	AKR1B1
1273	ACSL1
1274	SMOX
1275	PARK7
1276	CILK1
1277	IKBKG
1278	NOX3
1279	PCSK4
1280	LATS2
1281	GZMK
1282	ABHD5
1283	CSNK1E
1284	HTRA1
1285	KAT6B
1286	CHEK2
1287	KCNA4
1288	GABRR2
1289	SUCNR1
1290	AKR1C3
1291	FADS1
1292	PDE7B
1293	TXK
1294	TM4SF5
1295	PIP5K1A
1296	PCLAF
1297	B3GNT6
1298	CIB1
1299	ACMSD
1300	JPT2
1301	BIN3
1302	IDO1
1303	EIF4A1
1304	ADCK1
1305	PLA2G2C
1306	ERAP1
1307	NIPSNAP1
1308	RIPK3
1309	PAOX
1310	TAOK2
1311	NMNAT1
1312	HKDC1
1313	NR2F1
1314	RASGRF1
1315	TAF1L
1316	FUT5
1317	EPHA8
1318	NOS3
1319	MAPK4
1320	DCTPP1
1321	SLC7A5
1322	TUBA3C
1323	ELOVL4
1324	TIAM1
1325	SLC9A1
1326	JOSD1
1327	GEMIN4
1328	EEF1D
1329	NOTCH1
1330	PDYN
1331	PDE7A
1332	GGT1
1333	CYP4F11
1334	PLCG1
1335	ALDH18A1
1336	SLC5A4
1337	PFKFB3
1338	HRAS
1339	MORF4L1
1340	SGMS1
1341	DLK1
1342	NAE1
1343	PDE2A
1344	RAD51
1345	ORAI1
1346	NR6A1
1347	MAST4
1348	EIF2AK3
1349	NR1H3
1350	IL17F
1351	PTPN13
1352	GSK3A
1353	SLC11A1
1354	GATA4
1355	GDF15
1356	MAP2K2
1357	DPAGT1
1358	HNF4G
1359	PDK3
1360	MOGAT3
1361	KDM1B
1362	PRPS1
1363	TEAD1
1364	PTPN1
1365	RPS6KA1
1366	DCD
1367	ATXN3L
1368	P4HTM
1369	PLOD1
1370	E2F1
1371	MAPKAPK3
1372	VIPR2
1373	MAP1LC3A
1374	HAT1
1375	AIMP1
1376	EEF1G
1377	CHM
1378	ALKBH1
1379	APOBEC3B
1380	ACSL4
1381	IRAK2
1382	ASIC3
1383	JAG1
1384	PSMC4
1385	MACROD1
1386	AGBL4
1387	CSNK2B
1388	MECOM
1389	ALOX15
1390	GALNT1
1391	STK26
1392	ITPR2
1393	PTPN3
1394	FPR3
1395	AGTPBP1
1396	EPHA1
1397	DDX3X
1398	PPP4C
1399	CRY1
1400	PTPRO
1401	POMGNT1
1402	SIK3
1403	SLC1A1
1404	BHMT
1405	CBR1
1406	P2RX4
1407	MYC
1408	NUDT10
1409	WRN
1410	LIG3
1411	CCR5
1412	CHRNA4
1413	TRPM3
1414	ARPC2
1415	HSP90B1
1416	TRPC4
1417	EIF2AK1
1418	PCSK1
1419	KLF1
1420	SLC1A4
1421	CREB1
1422	OAZ1
1423	SLC33A1
1424	COQ7
1425	CBFB
1426	CDK14
1427	SREBF1
1428	PDE1C
1429	NOD1
1430	PLIN3
1431	IGFBP1
1432	TAOK3
1433	GPR4
1434	FERMT1
1435	ELK1
1436	KSR1
1437	DHRS9
1438	PDK4
1439	PHPT1
1440	FLI1
1441	PIP4K2C
1442	PRF1
1443	CCNE2
1444	CYP1A2
1445	APEX1
1446	KRT87P
1447	SPRR3
1448	KCNB1
1449	MT-ND6
1450	PMP22
1451	TLR5
1452	SAMHD1
1453	TNFAIP3
1454	BCL2A1
1455	HSPE1
1456	PCSK9
1457	SLC25A3
1458	CDC42
1459	ALDOA
1460	SLC28A1
1461	IGF2BP1
1462	MRC1
1463	MYL12B
1464	GNB1
1465	AP1B1
1466	OXER1
1467	CDKN2A
1468	SPIN3
1469	MCOLN3
1470	XAGE1A
1471	CHIT1
1472	DCUN1D3
1473	ALDH1B1
1474	USP33
1475	USP3
1476	RAP1A
1477	L3MBTL1
1478	MAP3K20
1479	VSIR
1480	PADI1
1481	BRF1
1482	COL2A1
1483	CLTC
1484	FEM1B
1485	RPS6KA6
1486	DCUN1D4
1487	PIK3CA
1488	PRUNE1
1489	SLC5A7
1490	GLRA1
1491	KIR2DL3
1492	MS4A1
1493	TFRC
1494	FLNA
1495	RSPO3
1496	IMPA1
1497	IFNAR1
1498	TPBG
1499	CD86
1500	CD80
1501	CD52
1502	IL1A
1503	TNFRSF4
1504	KCNJ8
1505	TIGIT
1506	CRIPTO
1507	GFRA1
1508	AFP
1509	IL1RL2
1510	COL4A4
1511	TNFSF4
1512	EPOR
1513	CD3E
1514	MAGEA3
1515	TNFSF13B
1516	IFNA6
1517	IL3RA
1518	TOP1
1519	SYNJ1
1520	CNKSR1
1521	MSRB2
1522	THBS1
1523	EYA3
1524	TAS2R1
1525	PNKP
1526	KCNMB1
1527	FGF4
1528	TARBP1
1529	SSTR4
1530	VKORC1
1531	CXCL12
1532	MYH7
1533	IL18RAP
1534	LINGO1
1535	CD276
1536	ICAM3
1537	KIR3DL2
1538	ITK
1539	NCBP2
1540	DLL4
1541	STEAP1
1542	IL10RB
1543	GPNMB
1544	CR1
1545	TRAF3IP2
1546	TACSTD2
1547	CXCR4
1548	CYP26A1
1549	OPRL1
1550	FLT4
1551	TEK
1552	GART
1553	RORC
1554	UBA3
1555	POLR2A
1556	SLC6A1
1557	HMGB1
1558	YWHAZ
1559	HK3
1560	TPSAB1
1561	NCS1
1562	CMKLR2
1563	RBM3
1564	ILF3
1565	PAK2
1566	SETD2
1567	KEAP1
1568	ARSB
1569	NHERF2
1570	ATP6AP1
1571	MT-CO1
1572	CHD4
1573	CYC1
1574	ACOX3
1575	PRRX1
1576	RECQL
1577	ADH7
1578	PLD3
1579	PFKFB1
1580	PTK2
1581	HAX1
1582	DNAJA2
1583	INSIG1
1584	TAB3
1585	HNRNPH2
1586	SEC22B
1587	PPM1G
1588	KLRK1
1589	NCK1
1590	GNAI3
1591	CSNK1G2-AS1
1592	GRIN2D
1593	SLC1A3
1594	PLA2G7
1595	GCK
1596	MEN1
1597	UBA52
1598	HADHB
1599	PPIL1
1600	LCP1
1601	ME1
1602	PLCD1
1603	GABRB1
1604	KIF5C
1605	TAF3
1606	CD58
1607	NAMPT
1608	CPT1A
1609	FPR2
1610	NPPA
1611	NAA40
1612	AMD1
1613	LIMK1
1614	NR4A1
1615	CAMKK1
1616	PPT1
1617	SLC16A7
1618	RAC2
1619	SLC17A1
1620	GUK1
1621	NLRP4
1622	TPSD1
1623	NMUR2
1624	ASIC1
1625	AP2A1
1626	CASP5
1627	CDK2AP2
1628	ELAVL1
1629	TUBB1
1630	GBA3
1631	EPCAM
1632	MCAM
1633	ZC3HAV1
1634	SELL
1635	ZNRD2
1636	CDK2AP1
1637	RNASE1
1638	SLC26A3
1639	ITSN1
1640	P2RX6
1641	SLC19A1
1642	CNOT1
1643	AKR1B10
1644	DNAJA1
1645	GRIN2C
1646	HSPB1
1647	MAP3K15
1648	ALDH1A1
1649	UBR4
1650	PRDX6
1651	ARPC5
1652	PFKL
1653	TAB2
1654	PGK1
1655	KMT2A
1656	PFKP
1657	THRAP3
1658	SND1
1659	FAM20C
1660	PRP4K
1661	STAMBPL1
1662	ASF1A
1663	ATP6V1B1
1664	UBE2V1
1665	ADIPOR1
1666	RIOK3
1667	ACKR1
1668	NCOR2
1669	BAG3
1670	TUBB4A
1671	VDAC1
1672	FUT2
1673	ARID4A
1674	ABCA1
1675	ZMPSTE24
1676	KDM1A
1677	GALNT3
1678	SLC12A1
1679	DNM1L
1680	CTAG1A
1681	LTF
1682	LAMA1
1683	TRPV5
1684	RGS4
1685	SLC25A6
1686	RABL3
1687	RAN
1688	PRDM2
1689	BCL2L11
1690	PRDM1
1691	DUSP23
1692	ACOX1
1693	GARS1
1694	DIO1
1695	ALDH5A1
1696	TUBB4B
1697	ADRB3
1698	PRKCD
1699	APCS
1700	CHEK1
1701	CA1
1702	SLC12A3
1703	CPT1B
1704	ANPEP
1705	MAP2K6
1706	MC5R
1707	PLD1
1708	P2RY4
1709	ACACA
1710	GRM4
1711	LTA4H
1712	HPD
1713	SLC6A12
1714	SSTR3
1715	PTGES3
1716	TPH2
1717	LTA
1718	ANGPTL3
1719	HCRTR2
1720	SPP1
1721	TNFRSF13C
1722	LILRA4
1723	CD33
1724	CD5
1725	S1PR5
1726	CSF1
1727	MTTP
1728	IL1RAP
1729	COL1A2
1730	TGFB3
1731	GPC3
1732	SLC39A6
1733	DLL3
1734	IL4R
1735	SLC44A4
1736	FYN
1737	CSF2RA
1738	SLAMF7
1739	IFNA1;
1740	CAPZA1
1741	PABPC1
1742	HUWE1
1743	GPX4
1744	PAK4
1745	EGLN3
1746	KCNK3
1747	DHCR24
1748	ADH5
1749	SLC16A1
1750	PRMT1
1751	HTR1B
1752	PDK1
1753	MOK
1754	RBM39
1755	FKBP3
1756	AWAT2
1757	B3GALT5
1758	AWAT1
1759	COPS5
1760	PPP3R1
1761	MAGEA4
1762	DDX1
1763	ATG4A
1764	VPS4B
1765	CD81
1766	GZMA
1767	MT-ND4
1768	YWHAE
1769	LY96
1770	CLK1
1771	GGT7
1772	CT83
1773	PRAP1
1774	PHF19
1775	PSMB10
1776	JAK2
1777	RFC5
1778	CDK2
1779	YOD1
1780	CASP3
1781	KRT81
1782	MAP3K11
1783	UGCG
1784	CASR
1785	SCN3A
1786	DNMT1
1787	TGFA
1788	NTSR1
1789	SCN10A
1790	SLC5A1
1791	TREM1
1792	LTBR
1793	CXCR1
1794	HSPA8
1795	CSF1R
1796	TRPV3
1797	IMPDH1
1798	NOTCH3
1799	BDKRB1
1800	ROR1
1801	CRHR1
1802	ASGR1
1803	SSTR2
1804	CALCR
1805	NQO1
1806	PPARD
1807	AOC3
1808	NCAM1
1809	SLC6A9
1810	SLC22A6
1811	PPARA
1812	PDE10A
1813	TGFBR1
1814	TRPV1
1815	NFKB2
1816	SLC22A11
1817	NOX1
1818	RARG
1819	LGALS3
1820	CTSC
1821	EPAS1
1822	HLA-DRB3
1823	TGM3
1824	GSTZ1
1825	CNR2
1826	SFMBT1
1827	PON1
1828	CBX8
1829	SCNN1G
1830	RPS6KC1
1831	GSTT1
1832	TAS2R13
1833	ALDH1A3
1834	ALDH1A2
1835	PDGFA
1836	POU3F2
1837	CERK
1838	SLC28A3
1839	AASDHPPT
1840	CACNA1D
1841	PANK3
1842	SRPK1
1843	DCLK1
1844	CACNA1E
1845	CRABP1
1846	CTDSP1
1847	PDE6A
1848	SENP7
1849	ASAP1
1850	LGALS7
1851	CBX3
1852	EHD1
1853	B4GALT1
1854	CXXC4
1855	SIGLEC15
1856	CDY1
1857	PTGR1
1858	GPR3
1859	SULT4A1
1860	AK4
1861	MPHOSPH8
1862	OLA1
1863	PTPA
1864	ZMYND11
1865	TPK1
1866	ERO1A
1867	MBTD1
1868	TGM1
1869	TAS2R7
1870	CPN1
1871	NEU4
1872	CSGALNACT1
1873	MICOS10
1874	GRIK3
1875	PRKAR1A
1876	TARS2
1877	ATP1A1
1878	KYAT3
1879	COG1
1880	PF4
1881	PRODH2
1882	IRF3
1883	HIBCH
1884	GOT2
1885	CHCHD6
1886	ORAI2
1887	NMRAL1
1888	SPAST
1889	NCF1
1890	GUCY1B1
1891	PHF23
1892	PSMA1
1893	YWHAB
1894	IL12RB1
1895	FOXC2
1896	CHCHD3
1897	CSRP1
1898	CCL7
1899	ATG4B
1900	HDAC4
1901	AQP1
1902	CDK6
1903	MBNL1
1904	OLR1
1905	TEAD4
1906	P2RX1
1907	DUOX1
1908	PLOD3
1909	GNAO1
1910	FBXO11
1911	DGAT2L6
1912	GPR37L1
1913	NAGPA
1914	CALML3
1915	TRIB1
1916	KMT2B
1917	RUVBL1
1918	SLC20A1
1919	FUT7
1920	NDUFA13
1921	NGLY1
1922	VNN1
1923	PLIN1
1924	EIF4H
1925	CRYGD
1926	INPPL1
1927	MAN2B1
1928	GK
1929	NCOA1
1930	BAZ1A
1931	ERVW-1
1932	SYNCRIP
1933	CMKLR1
1934	SQSTM1
1935	ELOVL7
1936	POU2F1
1937	SLC34A1
1938	CDK17
1939	GRK2
1940	HOGA1
1941	RBBP4
1942	PTPN6
1943	DYRK4
1944	CISD1
1945	SERPINH1
1946	CATSPER1
1947	POU3F3
1948	ACSL3
1949	ARL8B
1950	NMBR
1951	CAPNS1
1952	CD63
1953	TLL1
1954	PSMB4
1955	TMED10
1956	PFKFB4
1957	ORM2
1958	KLK2
1959	ALDH3A2
1960	FCGR3B
1961	TXNL1
1962	MOCS3
1963	PSME1
1964	CCT8
1965	UBAP2L
1966	ARPC1B
1967	PTHLH
1968	NDRG1
1969	SENP6
1970	TAAR6
1971	OTUD3
1972	IGFBP3
1973	GALE
1974	FAM120A
1975	ESRP1
1976	OSBP2
1977	CD209
1978	NSD1
1979	PITRM1
1980	ME3
1981	FUT10
1982	ARRB1
1983	HSPD1
1984	HSD17B13
1985	HLA-A
1986	HYOU1
1987	CDKL3
1988	BACH1
1989	CTNNA1
1990	ABCB6
1991	MMP16
1992	LY6E
1993	PIK3R2
1994	CNOT7
1995	ASH1L
1996	ZMYND8
1997	SUV39H1
1998	IKZF3
[truncated: 507 more rows]
