# Supplementary material
Source: Research Square preprint supplement (doi:10.21203/rs.3.rs-9392286/v1)
Supplement: Supplementary file 17 [file b88a2f7d6cdbd9188684bf22.xlsx]

## Sheet: TableS19（top30_genes_celltype）
Table S19: The Top30 Genes of Each of the Six Cell Types in the Test Set
cell_type	gene	mean_IPF	mean_control	n_IPF	n_control	pvalue	mean_diff	abs_diff	fdr
B_cell	FTL	-0.689122	0.4307013277568429	5	8	0.06234469739329481	-1.11982	1.1198234521677901	0.7086840544504177
B_cell	SCGB1A1	0.6475503492654466	-0.404719	5	8	0.1131441660045453	1.0522693175563507	1.0522693175563507	0.7086840544504177
B_cell	TMSB4X	-0.571902	0.35743857156719105	5	8	0.07054424077221547	-0.92934	0.9293402860746937	0.7086840544504177
B_cell	HSPA5	0.5411930794081796	-0.338246	5	8	0.2345425885329368	0.879438754038291	0.879438754038291	0.7086840544504177
B_cell	FTH1	-0.498181	0.31136316764081445	5	8	0.16586280546676288	-0.809544	0.8095442358661176	0.7086840544504177
B_cell	B2M	-0.493251	0.30828216876304304	5	8	0.17085928874593215	-0.801534	0.801533638783913	0.7086840544504177
B_cell	RHOH	0.46388656466321626	-0.289929	5	8	0.2210914989630726	0.7538156675777263	0.7538156675777263	0.7086840544504177
B_cell	CTSH	0.4513151770482784	-0.282072	5	8	0.244545234841925	0.7333871627034517	0.7333871627034517	0.7086840544504177
B_cell	MT.ND4	0.448706323815908	-0.280441	5	8	0.1645418723611405	0.7291477762008519	0.7291477762008519	0.7086840544504177
B_cell	MARK3	0.39824278309644845	-0.248902	5	8	0.3426223386998904	0.6471445225317285	0.6471445225317285	0.7086840544504177
B_cell	MYL6	0.39345233340534536	-0.245908	5	8	0.2072174095300888	0.6393600417836864	0.6393600417836864	0.7086840544504177
B_cell	BIRC3	0.3528939004070589	-0.220559	5	8	0.42391749239132215	0.5734525881614714	0.5734525881614714	0.7086840544504177
B_cell	FOXP1	0.3528939004070589	-0.220559	5	8	0.42391749239132215	0.5734525881614714	0.5734525881614714	0.7086840544504177
B_cell	2025-03-06	0.3528939004070589	-0.220559	5	8	0.42391749239132215	0.5734525881614714	0.5734525881614714	0.7086840544504177
B_cell	RBM6	0.3528939004070589	-0.220559	5	8	0.42391749239132215	0.5734525881614714	0.5734525881614714	0.7086840544504177
B_cell	ADAM28	0.3272413236250615	-0.204526	5	8	0.46878559058934693	0.5317671508907251	0.5317671508907251	0.7086840544504177
B_cell	MYH9	0.3272413236250615	-0.204526	5	8	0.46878559058934693	0.5317671508907251	0.5317671508907251	0.7086840544504177
B_cell	UTRN	0.3272413236250615	-0.204526	5	8	0.46878559058934693	0.5317671508907251	0.5317671508907251	0.7086840544504177
B_cell	MT.ND3	0.3223506242906048	-0.201469	5	8	0.2807531684091222	0.5238197644722329	0.5238197644722329	0.7086840544504177
B_cell	MT.CYB	0.317051432890115	-0.198157	5	8	0.34702952537635	0.515208578446438	0.515208578446438	0.7086840544504177
B_cell	MT.ATP6	0.2856052312728112	-0.178503	5	8	0.3930874827351557	0.46410850081831906	0.46410850081831906	0.7086840544504177
B_cell	TMSB10	0.2649408589759408	-0.165588	5	8	0.5311645494848254	0.43052889583590426	0.43052889583590426	0.7086840544504177
B_cell	MT.ND2	0.20590750429147808	-0.128692	5	8	0.5818850399148949	0.33459969447365356	0.33459969447365356	0.7086840544504177
B_cell	MT.ND1	0.19311502516532938	-0.120697	5	8	0.6152435476808085	0.3138119158936603	0.3138119158936603	0.7086840544504177
B_cell	EIF4A2	-0.173685	0.1085534126287544	5	8	0.5934706587926997	-0.282239	0.28223887283476023	0.7086840544504177
B_cell	SCAF11	-0.173685	0.1085534126287544	5	8	0.5934706587926997	-0.282239	0.28223887283476023	0.7086840544504177
B_cell	CD52	0.15370776507837264	-0.0960674	5	8	0.6444043069689184	0.2497751182523553	0.2497751182523553	0.7086840544504177
B_cell	ABI1	0.15265368081218453	-0.0954086	5	8	0.6905348286657118	0.2480622313197983	0.2480622313197983	0.7086840544504177
B_cell	ACADVL	0.15265368081218453	-0.0954086	5	8	0.6905348286657118	0.2480622313197983	0.2480622313197983	0.7086840544504177
B_cell	ACAP1	0.15265368081218453	-0.0954086	5	8	0.6905348286657118	0.2480622313197983	0.2480622313197983	0.7086840544504177
DC_cell	FOS	0.7912946047131203	-0.494559	5	8	0.053948509570690854	1.2858537326588197	1.2858537326588197	0.3344807593382833
DC_cell	FTH1	-0.775877	0.4849232915923507	5	8	0.008139980912974507	-1.2608	1.2608005581401136	0.3344807593382833
DC_cell	FTL	-0.765001	0.4781258904100928	5	8	0.012384232787214837	-1.24313	1.2431273150662454	0.3344807593382833
DC_cell	TMSB4X	-0.760535	0.4753345787640898	5	8	0.03858032923033314	-1.23587	1.2358699047866302	0.3344807593382833
DC_cell	ADIPOR1	0.7506334573980729	-0.469146	5	8	0.04633708217681105	1.2197793682718658	1.2197793682718658	0.3344807593382833
DC_cell	VIM	0.7358050384670106	-0.459878	5	8	0.028441557246756767	1.1956831875088902	1.1956831875088902	0.3344807593382833
DC_cell	MT.ND3	0.6649570354026478	-0.415598	5	8	0.027131653551905922	1.0805551825293023	1.0805551825293023	0.3344807593382833
DC_cell	YBX1	-0.652683	0.4079269011792482	5	8	0.04880022054487614	-1.06061	1.0606099430660405	0.3344807593382833
DC_cell	CSTB	-0.649538	0.4059612973462282	5	8	0.030345150630680374	-1.0555	1.0554993731001932	0.3344807593382833
DC_cell	IER2	0.6019090246410056	-0.376193	5	8	0.141209183653094	0.9781021650416346	0.9781021650416346	0.5276898645553372
DC_cell	S100A10	0.5894771536600568	-0.368423	5	8	0.05379501561066833	0.9579003746975914	0.9579003746975914	0.3344807593382833
DC_cell	GPX4	-0.573017	0.3581357216020714	5	8	0.06848282062154837	-0.931153	0.9311528761653869	0.3538279065446666
DC_cell	ARPC4	0.5694577938326829	-0.355911	5	8	0.061126008998541544	0.9253689149781095	0.9253689149781095	0.344528414355416
DC_cell	S100A11	0.55162340150726	-0.344765	5	8	0.09466544429393423	0.8963880274492967	0.8963880274492967	0.41923268187313734
DC_cell	ASAH1	-0.528051	0.33003173394594476	5	8	0.1787336638010013	-0.858083	0.8580825082594604	0.5276898645553372
DC_cell	CCL18	0.5235648247044639	-0.327228	5	8	0.0845696808456024	0.8507928401447555	0.8507928401447555	0.403332324032873
DC_cell	CEBPD	0.512256041827912	-0.32016	5	8	0.19158563009644933	0.8324160679703572	0.8324160679703572	0.5399231393627208
DC_cell	CYBA	0.4826195109275066	-0.301637	5	8	0.14970091159390714	0.7842567052571989	0.7842567052571989	0.5276898645553372
DC_cell	MAP3K8	-0.478686	0.29917856346354504	5	8	0.16613353345428034	-0.777864	0.7778642650052139	0.5276898645553372
DC_cell	ARRB2	0.4685209540808406	-0.292826	5	8	0.11902980129990166	0.7613465503813657	0.7613465503813657	0.49198984537292695
DC_cell	MYL6	-0.431968	0.2699798586194524	5	8	0.21641117328089318	-0.701948	0.7019476324105784	0.5441594104346474
DC_cell	PGK1	0.4308095036763986	-0.269256	5	8	0.17827737323279758	0.7000654434741491	0.7000654434741491	0.5276898645553372
DC_cell	MT.CYB	0.4203911980520554	-0.262744	5	8	0.2029441241769605	0.6831356968345912	0.6831356968345912	0.5441594104346474
DC_cell	UBB	0.4139400943918378	-0.258713	5	8	0.1683013247245124	0.6726526533867383	0.6726526533867383	0.5276898645553372
DC_cell	ACSL1	-0.406351	0.2539696490127793	5	8	0.3101583419116692	-0.660321	0.660321087433223	0.6409939066174497
DC_cell	PPP1R15A	0.3787016494324032	-0.236689	5	8	0.25872682318054047	0.6153901803276567	0.6153901803276567	0.5941134458219818
DC_cell	BNIP3L	-0.372538	0.23283629541465792	5	8	0.22628989380937856	-0.605374	0.60537436807811	0.5441594104346474
DC_cell	H3F3A	0.371022294243846	-0.231889	5	8	0.22819588179517475	0.6029112281462519	0.6029112281462519	0.5441594104346474
DC_cell	THBD	-0.351583	0.21973959721239816	5	8	0.27488767351267657	-0.571323	0.5713229527522352	0.6086798484923552
DC_cell	HBEGF	0.33305315862160595	-0.208158	5	8	0.2942644290897621	0.5412113827601113	0.5412113827601113	0.6291170552953533
Endothelial_cells	GDPD3	1.1943162411393584	-0.746448	5	8	1.0615410740020924e-9	1.9407638918514576	1.9407638918514576	1.2133414475843916e-5
Endothelial_cells	SLC25A23	1.117884859253545	-0.698678	5	8	0.002647381897435266	1.816562896287011	1.816562896287011	0.2830755104121538
Endothelial_cells	MAN1C1	1.0882027227520257	-0.680127	5	8	2.3267576004147248e-5	1.768329424472043	1.768329424472043	0.11545281349391813
Endothelial_cells	PC	1.0842959290266827	-0.677685	5	8	8.257001898698274e-4	1.7619808846683598	1.7619808846683598	0.22509225618039425
Endothelial_cells	THBS2	1.081668635407656	-0.676043	5	8	0.006102763704064569	1.7577115325374404	1.7577115325374404	0.2968520299997239
Endothelial_cells	MDK	1.0713218227530037	-0.669576	5	8	4.797381426358094e-5	1.7408979619736304	1.7408979619736304	0.11545281349391813
Endothelial_cells	SAMD3	-1.06876	0.66797614224761	5	8	3.3206039883412346e-4	-1.73674	1.736737969843787	0.21135156293003637
Endothelial_cells	AQP5	1.061950253777162	-0.663719	5	8	0.0020767957755373546	1.725669162387888	1.725669162387888	0.28259256802847577
Endothelial_cells	RAI1	1.0614650237445913	-0.663416	5	8	3.196863663715574e-5	1.724880663584961	1.724880663584961	0.11545281349391813
Endothelial_cells	NTRK3	1.0598350295461583	-0.662397	5	8	8.137618105221315e-4	1.7222319230125067	1.7222319230125067	0.22509225618039425
Endothelial_cells	SFRP2	1.0554127577395551	-0.659633	5	8	6.524245943942663e-5	1.7150457313267773	1.7150457313267773	0.12428688523210774
Endothelial_cells	BNC2	1.0519427124154053	-0.657464	5	8	0.003458278300614522	1.709406907675034	1.709406907675034	0.28686516892863795
Endothelial_cells	NR2F2	1.0505673286858517	-0.656605	5	8	1.1394568347624372e-4	1.707171909114508	1.707171909114508	0.1627998952666832
Endothelial_cells	ARL6	1.04498696660438	-0.653117	5	8	5.050429286698081e-5	1.698103820732119	1.698103820732119	0.11545281349391813
Endothelial_cells	TATDN3	-1.04358	0.6522400013111413	5	8	4.980753476144038e-4	-1.69582	1.6958240034089678	0.22509225618039425
Endothelial_cells	PAPPA	1.035761514791245	-0.647351	5	8	0.011278308572644356	1.6831124615357733	1.6831124615357733	0.3222776674633125
Endothelial_cells	CHPF	1.0353329777194296	-0.647083	5	8	0.0011198472740705744	1.6824160887940725	1.6824160887940725	0.22509225618039425
Endothelial_cells	NYNRIN	1.0341342799416187	-0.646334	5	8	7.187358905240327e-4	1.6804682049051307	1.6804682049051307	0.22509225618039425
Endothelial_cells	DGKA	1.0321404698032772	-0.645088	5	8	0.0010648774420349044	1.677228263430326	1.677228263430326	0.22509225618039425
Endothelial_cells	ACTG1	1.0295876663310455	-0.643492	5	8	8.758498297651947e-5	1.6730799577879525	1.6730799577879525	0.14301376506023109
Endothelial_cells	VSTM2L	1.028373710110161	-0.642734	5	8	2.9035579858837556e-4	1.6711072789290116	1.6711072789290116	0.21135156293003637
Endothelial_cells	OSBPL10	1.0273453801945478	-0.642091	5	8	0.0017818953623736907	1.6694362428161393	1.6694362428161393	0.26798768410435897
Endothelial_cells	NDFIP2	1.0205143541802864	-0.637821	5	8	5.705158267209202e-4	1.6583358255429659	1.6583358255429659	0.22509225618039425
Endothelial_cells	NUDT12	1.0203630936371795	-0.637727	5	8	1.4753416838623584e-4	1.658090027160418	1.658090027160418	0.1744527947816071
Endothelial_cells	MUC5B	1.0195787605702158	-0.637237	5	8	0.00366830797855418	1.6568154859265998	1.6568154859265998	0.28686516892863795
Endothelial_cells	TDRD3	1.008958782544747	-0.630599	5	8	1.545479945376978e-4	1.6395580216352152	1.6395580216352152	0.1744527947816071
Endothelial_cells	UBE2D2	-1.00895	0.6305950869308665	5	8	0.0035507500426467443	-1.63955	1.6395472260202526	0.28686516892863795
Endothelial_cells	LRP5	1.0083266020102286	-0.630204	5	8	6.039988699004563e-4	1.6385307282666215	1.6385307282666215	0.22509225618039425
Endothelial_cells	HMGB3	1.007273602957318	-0.629546	5	8	4.879883710778203e-4	1.6368196048056405	1.6368196048056405	0.22509225618039425
Endothelial_cells	CPA3	1.0051676734814534	-0.62823	5	8	0.008258471843438087	1.6333974694073605	1.6333974694073605	0.2968520299997239
Epithelial_cells	EMB	1.111269195834999	-0.694543	5	8	1.7031765186519904e-5	1.805812443231872	1.805812443231872	0.09812870711483827
Epithelial_cells	CAMK1D	1.0998252530110795	-0.687391	5	8	1.2073310985999584e-5	1.7872160361430043	1.7872160361430043	0.09812870711483827
Epithelial_cells	SLCO2A1	1.091390475216308	-0.682119	5	8	4.6656409792227016e-5	1.7735095222265005	1.7735095222265005	0.1115368132492979
Epithelial_cells	IL32	1.0708678687965278	-0.669292	5	8	3.031873862501968e-5	1.7401602867943589	1.7401602867943589	0.09812870711483827
Epithelial_cells	APOL1	1.0648369075552822	-0.665523	5	8	3.283818526389635e-5	1.7303599747773335	1.7303599747773335	0.09812870711483827
Epithelial_cells	ACAT2	-1.05546	0.6596641002478084	5	8	1.5410825956922497e-4	-1.71513	1.7151266606443003	0.1535046688859122
Epithelial_cells	KLHL9	1.0509432785213526	-0.65684	5	8	9.463094222079399e-5	1.707782827597199	1.707782827597199	0.1507952086539021
Epithelial_cells	TRAF5	1.0455280445456339	-0.653455	5	8	8.319371139030906e-5	1.698983072386656	1.698983072386656	0.1507952086539021
Epithelial_cells	EPSTI1	1.0300728314257563	-0.643796	5	8	1.1354110916800126e-4	1.6738683510668546	1.6738683510668546	0.1507952086539021
Epithelial_cells	TMEM260	1.0238022455370148	-0.639876	5	8	1.0823174431130771e-4	1.663678648997649	1.663678648997649	0.1507952086539021
Epithelial_cells	GPM6A	-1.01727	0.6357914899010262	5	8	0.003914208259574566	-1.65306	1.6530578737426667	0.2905995734577315
Epithelial_cells	HMGB3	1.0091311095729751	-0.630707	5	8	1.4658128811768952e-4	1.6398380530560854	1.6398380530560854	0.1535046688859122
Epithelial_cells	ATP12A	1.0079274183922424	-0.629955	5	8	1.515739424330342e-4	1.6378820548873942	1.6378820548873942	0.1535046688859122
Epithelial_cells	ZNF74	-1.00696	0.6293523481319019	5	8	0.008866933596703852	-1.63632	1.636316105142945	0.33120767900437853
Epithelial_cells	MDK	1.0017719624174513	-0.626107	5	8	1.7733012864983063e-4	1.6278794389283577	1.6278794389283577	0.16304823290395581
Epithelial_cells	KRT15	0.9986664960845205	-0.624167	5	8	0.004723302693900189	1.6228330561373463	1.6228330561373463	0.2999108278543032
Epithelial_cells	PRODH	-0.996025	0.6225156352581468	5	8	2.3208343609701883e-4	-1.61854	1.6185406516711822	0.17921166359155835
Epithelial_cells	RNF114	-0.994755	0.6217218410571755	5	8	2.1001284954445497e-4	-1.61648	1.6164767867486542	0.17921166359155835
Epithelial_cells	IL33	0.9938936990429542	-0.621184	5	8	2.520486563330304e-4	1.6150772609448003	1.6150772609448003	0.17921166359155835
Epithelial_cells	STEAP3	0.99101646919569	-0.619385	5	8	5.162284619637634e-4	1.6104017624429958	1.6104017624429958	0.25555784468500164
Epithelial_cells	EEF2K	0.989960639796731	-0.618725	5	8	0.0016744859162235027	1.608686039669688	1.608686039669688	0.27016308525936367
Epithelial_cells	AQP5	0.9882956925676889	-0.617685	5	8	2.5488147586852605e-4	1.605980500422494	1.605980500422494	0.17921166359155835
Epithelial_cells	PRKAA2	0.9880888601316002	-0.617556	5	8	0.0020092945992248017	1.6056443977138493	1.6056443977138493	0.27016308525936367
Epithelial_cells	TIMP1	0.9876414092968552	-0.617276	5	8	0.001146078912144132	1.6049172901073896	1.6049172901073896	0.2677796084631154
Epithelial_cells	TRIM68	0.9861554524360578	-0.616347	5	8	3.32985309219228e-4	1.602502610208594	1.602502610208594	0.2094828105840754
Epithelial_cells	PHACTR3	0.9836593361963376	-0.614787	5	8	0.001120855429419765	1.5984464213190486	1.5984464213190486	0.2677796084631154
Epithelial_cells	RAMP3	0.9827204459432699	-0.6142	5	8	0.0018982131453263065	1.596920724657815	1.596920724657815	0.27016308525936367
Epithelial_cells	FHL2	0.9765617143355632	-0.610351	5	8	3.1404097045415803e-4	1.5869127857952903	1.5869127857952903	0.2085406511021417
Epithelial_cells	CFH	0.9753370783106335	-0.609586	5	8	6.294700802146626e-4	1.5849227522547795	1.5849227522547795	0.2677796084631154
Epithelial_cells	EBP	-0.97513	0.6094564091399883	5	8	0.004464280302609166	-1.58459	1.584586663763968	0.2997839463881313
Fibroblasts	COL1A2	0.8855396529127806	-0.553462	5	8	0.035006456130709476	1.439001935983267	1.439001935983267	0.0986545581865449
Fibroblasts	SPCS3	-0.842873	0.5267954145203004	5	8	0.0034444010912853215	-1.36967	1.3696680777527814	0.037500980453998786
Fibroblasts	FN1	0.8417056067748436	-0.526066	5	8	0.004257735440245901	1.3677716110091223	1.3677716110091223	0.037500980453998786
Fibroblasts	SGK1	0.8211134550502703	-0.513196	5	8	0.004599119651552872	1.33430936445669	1.33430936445669	0.037500980453998786
Fibroblasts	SRSF2	0.8191466371820546	-0.511967	5	8	0.0048388361876127465	1.3311132854208383	1.3311132854208383	0.037500980453998786
Fibroblasts	CSTB	-0.786941	0.49183804355556887	5	8	0.009382527133310954	-1.27878	1.278778913244485	0.05817166822652792
Fibroblasts	TMSB4X	-0.778793	0.48674562052546994	5	8	0.023151177617785505	-1.26554	1.2655386133662214	0.0986545581865449
Fibroblasts	FTL	-0.706716	0.4416978020168164	5	8	0.02791207377412141	-1.14841	1.1484142852437276	0.0986545581865449
Fibroblasts	FTH1	-0.694987	0.43436657677116863	5	8	0.029733412063310573	-1.12935	1.1293530996050358	0.0986545581865449
Fibroblasts	DUSP1	-0.688615	0.4303845689084166	5	8	0.03019923115318371	-1.119	1.1189998791618812	0.0986545581865449
Fibroblasts	SCPEP1	0.6430621580480088	-0.401914	5	8	0.032304425280500225	1.0449760068280127	1.0449760068280127	0.0986545581865449
Fibroblasts	B2M	-0.627088	0.3919298306386196	5	8	0.07275165534547796	-1.01902	1.0190175596604105	0.17348471659306283
Fibroblasts	LGALS3BP	0.5611183284164935	-0.350699	5	8	0.06184466754867228	0.911817283676801	0.911817283676801	0.1597653911674034
Fibroblasts	NUCB1	0.5298671290103292	-0.331167	5	8	0.09585068461088019	0.8610340846417852	0.8610340846417852	0.21224080163837755
Fibroblasts	IER3	0.5038236256087709	-0.31489	5	8	0.14790115664836817	0.8187133916142536	0.8187133916142536	0.2547186586721896
Fibroblasts	MT.ND2	0.4685651932236038	-0.292853	5	8	0.13870534155476802	0.7614184389883576	0.7614184389883576	0.2547186586721896
Fibroblasts	PLD3	0.4577666528056996	-0.286104	5	8	0.13143724895154654	0.7438708108092619	0.7438708108092619	0.2547186586721896
Fibroblasts	MT.CO2	-0.451191	0.2819941078301401	5	8	0.17530470003123272	-0.733185	0.7331846803583588	0.2860234579456955
Fibroblasts	LY6E	0.44659568803872585	-0.279122	5	8	0.14619231660260812	0.7257179930629292	0.7257179930629292	0.2547186586721896
Fibroblasts	VIM	-0.404919	0.2530742371442124	5	8	0.19062875759865763	-0.657993	0.657993016574951	0.29547457427791934
Fibroblasts	AHNAK	0.386804695954748	-0.241753	5	8	0.2413017541671591	0.6285576309264657	0.6285576309264657	0.3400161081446333
Fibroblasts	CCL21	0.3846832999996822	-0.240427	5	8	0.23314701483379371	0.6251103624994849	0.6251103624994849	0.3400161081446333
Fibroblasts	IGHA1	0.2972665975719436	-0.185792	5	8	0.44126958314919307	0.4830582210544089	0.4830582210544089	0.5471742831049994
Fibroblasts	MT.CO3	0.2826848336470928	-0.176678	5	8	0.38661812503369697	0.4593628546765244	0.4593628546765244	0.521093994610635
Fibroblasts	EMC7	0.24478966139143557	-0.152994	5	8	0.4248571913905199	0.3977831997610842	0.3977831997610842	0.5471742831049994
Fibroblasts	CD63	0.22935018277387204	-0.143344	5	8	0.49409111190109645	0.3726940470075425	0.3726940470075425	0.5891086334205381
Fibroblasts	FOS	-0.198759	0.12422437207834136	5	8	0.5760583053401256	-0.322983	0.32298336740368816	0.6614002765016257
Fibroblasts	IAH1	0.13856886280161734	-0.0866055	5	8	0.6693407768030613	0.22517440205262923	0.22517440205262923	0.7410558600319607
Fibroblasts	IQGAP1	0.11339825052998322	-0.0708739	5	8	0.7298853363199104	0.18427215711122508	0.18427215711122508	0.7802222560661111
Fibroblasts	MT.CO1	-0.0727696	0.04548103091454951	5	8	0.8189069400791491	-0.118251	0.11825068037782557	0.8424136481076522
Neutrophils	FTL	-0.847444	0.5296526812812679	5	8	0.008410564377670744	-1.3771	1.377096971331294	0.28730864826425345
Neutrophils	FTH1	-0.823339	0.5145871064723584	5	8	0.017849286618608063	-1.33793	1.3379264768281307	0.28730864826425345
Neutrophils	S100A12	-0.798116	0.49882232725206693	5	8	0.03423655953088917	-1.29694	1.2969380508553756	0.28730864826425345
Neutrophils	CXCL8	-0.79726	0.4982872183885497	5	8	0.05753093723242402	-1.29555	1.2955467678102268	0.28730864826425345
Neutrophils	SCGB3A1	0.7901754846046984	-0.49386	5	8	0.032209386870625085	1.2840351624826343	1.2840351624826343	0.28730864826425345
Neutrophils	TMSB4X	-0.787724	0.49232740900640193	5	8	0.0191655940866419	-1.28005	1.280051263416646	0.28730864826425345
Neutrophils	MT.ND5	-0.773248	0.4832802769470559	5	8	0.00895094457323041	-1.25653	1.256528720062347	0.28730864826425345
Neutrophils	JUNB	-0.767255	0.47953463193247925	5	8	0.04637061821656938	-1.24679	1.2467900430244474	0.28730864826425345
Neutrophils	PLXDC2	-0.762655	0.47665959131643276	5	8	0.013022068701169351	-1.23931	1.2393149374227241	0.28730864826425345
Neutrophils	CDC42SE1	-0.745346	0.46584141312564203	5	8	0.019588217610152607	-1.21119	1.2111876741266705	0.28730864826425345
Neutrophils	AKAP13	-0.728912	0.4555702898863873	5	8	0.08416563989324082	-1.18448	1.1844827537046043	0.28730864826425345
Neutrophils	MT.CO2	-0.727018	0.45438610216468706	5	8	0.06197155604645229	-1.1814	1.1814038656281847	0.28730864826425345
Neutrophils	MYL6	-0.722814	0.45175881225863784	5	8	0.014789049127991675	-1.17457	1.1745729118724597	0.28730864826425345
Neutrophils	LST1	-0.714373	0.4464832834194792	5	8	0.11017366702969991	-1.16086	1.160856536890647	0.28730864826425345
Neutrophils	MT.CO1	-0.71293	0.44558137178347934	5	8	0.016777165010334792	-1.15851	1.1585115666370478	0.28730864826425345
Neutrophils	CD53	-0.712151	0.4450941751491979	5	8	0.01973481590028594	-1.15724	1.1572448553879124	0.28730864826425345
Neutrophils	S100A8	-0.710902	0.444313768671599	5	8	0.03488537530584687	-1.15522	1.1552157985461555	0.28730864826425345
Neutrophils	IFNGR1	-0.710076	0.4437975088796609	5	8	0.017835085096777642	-1.15387	1.1538735230871182	0.28730864826425345
Neutrophils	MXD1	-0.707129	0.44195576820542365	5	8	0.01980522174332935	-1.14908	1.1490849973341017	0.28730864826425345
Neutrophils	LCP1	-0.70533	0.44083112088178034	5	8	0.028983209792622196	-1.14616	1.1461609142926328	0.28730864826425345
Neutrophils	ANXA2	-0.698135	0.4363345965815868	5	8	0.07847033088389344	-1.13447	1.1344699511121246	0.28730864826425345
Neutrophils	ARHGDIB	-0.683588	0.4272423494147663	5	8	0.023415160926456933	-1.11083	1.1108301084783923	0.28730864826425345
Neutrophils	BTG1	-0.680772	0.4254827449773292	5	8	0.07042667107666077	-1.10626	1.1062551369410554	0.28730864826425345
Neutrophils	PNRC1	-0.676164	0.4226027836433963	5	8	0.03081817772026462	-1.09877	1.0987672374728321	0.28730864826425345
Neutrophils	TMSB10	-0.66687	0.4167939247281961	5	8	0.05328951332988744	-1.08366	1.0836642042933091	0.28730864826425345
Neutrophils	B2M	-0.657347	0.4108421188216832	5	8	0.03727413915925735	-1.06819	1.0681895089363769	0.28730864826425345
Neutrophils	PELI1	-0.656144	0.4100897578804149	5	8	0.035430800063489545	-1.06623	1.066233370489079	0.28730864826425345
Neutrophils	IFITM2	-0.653324	0.4083272494284084	5	8	0.02940649723316846	-1.06165	1.0616508485138623	0.28730864826425345
Neutrophils	FAM49B	-0.647832	0.404895022981174	5	8	0.05526675593421329	-1.05273	1.0527270597510543	0.28730864826425345
Neutrophils	LYN	-0.647832	0.404895022981174	5	8	0.05526675593421329	-1.05273	1.0527270597510543	0.28730864826425345

## Sheet: Table S19(GO_TOP30_EP)
Table S19: Go Enrichment Analysis (BP) of the Top30 Genes in Epithelial Cells of the Training set (pvalueCutoff = 0.05, qvalueCutoff = 0.2)
ID	Description	GeneRatio	BgRatio	RichFactor	FoldEnrichment	zScore	pvalue	p.adjust	qvalue	geneID	Count
GO:0090594	inflammatory response to wounding	3/29	29/18986	0.103448	67.7265	14.0648	1.13987e-05	0.00978008	0.00778711	MDK/IL33/TIMP1	3
When pvalueCutoff = 0.05 and qvalueCutoff = 0.2, CC and MP were not enriched(the Top30 Genes in Epithelial Cells of the Training set)

## Sheet: Table S19(GO_TOP30_B)
Table S19: Go Enrichment Analysis (BP) of the Top30 Genes in B Cells of the Training set (pvalueCutoff = 0.05, qvalueCutoff = 0.2)
ID	Description	GeneRatio	BgRatio	RichFactor	FoldEnrichment	zScore	pvalue	p.adjust	qvalue	geneID	Count
GO:0006826	iron ion transport	3/23	58/18986	0.0517241	42.6972	11.076	4.58777e-05	0.017546	0.0131307	FTL/FTH1/B2M	3
GO:0032507	maintenance of protein location in cell	3/23	68/18986	0.0441176	36.4182	10.1896	7.39277e-05	0.017546	0.0131307	TMSB4X/HSPA5/TMSB10	3
GO:0042989	sequestering of actin monomers	2/23	11/18986	0.181818	150.087	17.2251	7.66984e-05	0.017546	0.0131307	TMSB4X/TMSB10	2
GO:0006879	intracellular iron ion homeostasis	3/23	73/18986	0.0410959	33.9238	9.81536	9.13857e-05	0.017546	0.0131307	FTL/FTH1/B2M	3
GO:0045185	maintenance of protein location	3/23	95/18986	0.0315789	26.0677	8.53032	0.000199872	0.0307004	0.0229748	TMSB4X/HSPA5/TMSB10	3
GO:0000041	transition metal ion transport	3/23	102/18986	0.0294118	24.2788	8.20973	0.00024657	0.0315609	0.0236188	FTL/FTH1/B2M	3
Table S19: Go Enrichment Analysis (CC) of the Top30 Genes in B Cells of the Training set (pvalueCutoff = 0.05, qvalueCutoff = 0.2)
ID	Description	GeneRatio	BgRatio	RichFactor	FoldEnrichment	zScore	pvalue	p.adjust	qvalue	geneID	Count
GO:1904724	tertiary granule lumen	3/23	55/19960	0.0545455	47.336	11.6875	3.37178e-05	0.00370895	0.00248447	FTH1/B2M/CTSH	3
GO:0070938	contractile ring	2/23	11/19960	0.181818	157.787	17.6664	6.94179e-05	0.00381799	0.0025575	MYH9/UTRN	2
GO:0044754	autolysosome	2/23	15/19960	0.133333	115.71	15.095	0.000132154	0.00484564	0.00324588	FTL/FTH1	2
GO:0005767	secondary lysosome	2/23	23/19960	0.0869565	75.4631	12.1361	0.000316647	0.00696744	0.00466718	FTL/FTH1	2
GO:0016460	myosin II complex	2/23	26/19960	0.0769231	66.7559	11.3953	0.000405905	0.00696744	0.00466718	MYL6/MYH9	2
GO:0034774	secretory granule lumen	4/23	324/19960	0.0123457	10.7139	5.98747	0.000472866	0.00696744	0.00466718	FTL/TMSB4X/B2M/CTSH	4
GO:0060205	cytoplasmic vesicle lumen	4/23	329/19960	0.0121581	10.5511	5.93311	0.000500963	0.00696744	0.00466718	FTL/TMSB4X/B2M/CTSH	4
GO:0031983	vesicle lumen	4/23	330/19960	0.0121212	10.5191	5.92238	0.000506723	0.00696744	0.00466718	FTL/TMSB4X/B2M/CTSH	4
GO:0008180	COP9 signalosome	2/23	36/19960	0.0555556	48.2126	9.62995	0.000781338	0.00870653	0.00583213	HSPA5/MYH9	2
GO:0070820	tertiary granule	3/23	164/19960	0.0182927	15.8749	6.49665	0.000854714	0.00870653	0.00583213	FTH1/B2M/CTSH	3
GO:0031904	endosome lumen	2/23	38/19960	0.0526316	45.6751	9.36254	0.000870653	0.00870653	0.00583213	B2M/CTSH	2
GO:0001772	immunological synapse	2/23	48/19960	0.0416667	36.1594	8.28339	0.00138726	0.0127165	0.00851826	RHOH/MYH9	2
GO:0016459	myosin complex	2/23	57/19960	0.0350877	30.45	7.56254	0.0019505	0.0165042	0.0110555	MYL6/MYH9	2
GO:0031594	neuromuscular junction	2/23	78/19960	0.025641	22.252	6.38733	0.00361651	0.0284154	0.0190343	MYH9/UTRN	2
GO:0030175	filopodium	2/23	106/19960	0.0188679	16.3741	5.3904	0.00657212	0.0448844	0.0300661	UTRN/ABI1	2
GO:0005903	brush border	2/23	109/19960	0.0183486	15.9234	5.30632	0.00693667	0.0448844	0.0300661	MYL6/MYH9	2
GO:0055038	recycling endosome membrane	2/23	109/19960	0.0183486	15.9234	5.30632	0.00693667	0.0448844	0.0300661	B2M/ACAP1	2
GO:0140534	endoplasmic reticulum protein-containing complex	2/23	116/19960	0.0172414	14.9625	5.1225	0.00782232	0.0468038	0.0313518	HSPA5/B2M	2
GO:0005776	autophagosome	2/23	118/19960	0.0169492	14.7089	5.07288	0.00808429	0.0468038	0.0313518	FTL/FTH1	2
GO:1904813	ficolin-1-rich granule lumen	2/23	124/19960	0.016129	13.9972	4.93102	0.00889372	0.0489154	0.0327663	FTH1/CTSH	2
Table S19: Go Enrichment Analysis (MF) of the Top30 Genes in B Cells of the Training set (pvalueCutoff = 0.05, qvalueCutoff = 0.2)
ID	Description	GeneRatio	BgRatio	RichFactor	FoldEnrichment	zScore	pvalue	p.adjust	qvalue	geneID	Count
GO:0008199	ferric iron binding	2/22	11/18737	0.181818	154.851	17.4997	7.19193e-05	0.00805496	0.00545073	FTL/FTH1	2
GO:0008198	ferrous iron binding	2/22	26/18737	0.0769231	65.514	11.2862	0.000420467	0.0195679	0.0132415	FTL/FTH1	2
GO:0003785	actin monomer binding	2/22	29/18737	0.0689655	58.7367	10.6682	0.000524141	0.0195679	0.0132415	TMSB4X/TMSB10	2
GO:0000146	microfilament motor activity	2/22	38/18737	0.0526316	44.8254	9.27178	0.000901777	0.0252498	0.0170863	MYL6/MYH9	2
GO:0043028	cysteine-type endopeptidase regulator activity involved in apoptotic process	2/22	44/18737	0.0454545	38.7128	8.58679	0.00120832	0.0270665	0.0183156	CTSH/BIRC3	2
GO:0003779	actin binding	4/22	441/18737	0.00907029	7.72501	4.89992	0.00158156	0.029038	0.0196498	TMSB4X/MYH9/UTRN/TMSB10	4
GO:0140313	molecular sequestering activity	2/22	54/18737	0.037037	31.5438	7.70639	0.00181488	0.029038	0.0196498	TMSB4X/FTH1	2

## Sheet: Table S19(GO_TOP30_DC)
Table S19: Go Enrichment Analysis (BP) of the Top30 Genes in DC of the Training set (pvalueCutoff = 0.05, qvalueCutoff = 0.2)
ID	Description	GeneRatio	BgRatio	RichFactor	FoldEnrichment	zScore	pvalue	p.adjust	qvalue	geneID	Count
GO:0031638	zymogen activation	4/42	58/18986	0.0689655	31.1757	10.8371	8.04708e-06	0.0121511	0.00979202	S100A10/PGK1/THBD/CTSL	4
GO:0019886	antigen processing and presentation of exogenous peptide antigen via MHC class II	3/42	31/18986	0.0967742	43.7465	11.2154	4.33366e-05	0.022464	0.0181027	CD74/CTSL/B2M	3
GO:0002495	antigen processing and presentation of peptide antigen via MHC class II	3/42	35/18986	0.0857143	38.7469	10.5243	6.27135e-05	0.022464	0.0181027	CD74/CTSL/B2M	3
GO:0002504	antigen processing and presentation of peptide or polysaccharide antigen via MHC class II	3/42	37/18986	0.0810811	36.6525	10.221	7.42225e-05	0.022464	0.0181027	CD74/CTSL/B2M	3
GO:0060326	cell chemotaxis	6/42	328/18986	0.0182927	8.26916	6.25292	7.88677e-05	0.022464	0.0181027	TMSB4X/CCL18/ARRB2/HBEGF/CD74/DUSP1	6
GO:0002478	antigen processing and presentation of exogenous peptide antigen	3/42	41/18986	0.0731707	33.0767	9.68117	0.000101204	0.022464	0.0181027	CD74/CTSL/B2M	3
GO:0032496	response to lipopolysaccharide	6/42	354/18986	0.0169492	7.66182	5.95743	0.000119872	0.022464	0.0181027	FOS/VIM/GPX4/THBD/CD68/B2M	6
GO:0019882	antigen processing and presentation	4/42	118/18986	0.0338983	15.3236	7.34896	0.000132229	0.022464	0.0181027	CD74/CTSL/CD68/B2M	4
GO:0021879	forebrain neuron differentiation	3/42	45/18986	0.0666667	30.1365	9.21375	0.000133891	0.022464	0.0181027	UBB/INHBA/B2M	3
GO:0140467	integrated stress response signaling	3/42	48/18986	0.0625	28.253	8.90147	0.000162447	0.0225228	0.0181501	FOS/CEBPD/PPP1R15A	3
GO:0002237	response to molecule of bacterial origin	6/42	375/18986	0.016	7.23276	5.73991	0.000164073	0.0225228	0.0181501	FOS/VIM/GPX4/THBD/CD68/B2M	6
GO:0019884	antigen processing and presentation of exogenous antigen	3/42	50/18986	0.06	27.1229	8.70875	0.000183521	0.0230931	0.0186097	CD74/CTSL/B2M	3
GO:0021872	forebrain generation of neurons	3/42	55/18986	0.0545455	24.6571	8.27277	0.000243766	0.027984	0.022551	UBB/INHBA/B2M	3
GO:0002604	regulation of dendritic cell antigen processing and presentation	2/42	11/18986	0.181818	82.1905	12.6825	0.000259454	0.027984	0.022551	CD74/CD68	2
GO:0006826	iron ion transport	3/42	58/18986	0.0517241	23.3818	8.03804	0.000285384	0.0287286	0.0231511	FTH1/FTL/B2M	3
GO:0110075	regulation of ferroptosis	2/42	12/18986	0.166667	75.3413	12.1293	0.000310908	0.0293419	0.0236454	FTH1/GPX4	2
GO:0097707	ferroptosis	2/42	13/18986	0.153846	69.5458	11.6407	0.000366921	0.0322935	0.0260239	FTH1/GPX4	2
GO:0071456	cellular response to hypoxia	4/42	156/18986	0.025641	11.591	6.25413	0.000384955	0.0322935	0.0260239	FOS/PGK1/BNIP3L/INHBA	4
GO:0036294	cellular response to decreased oxygen levels	4/42	163/18986	0.0245399	11.0932	6.09357	0.000454503	0.0361184	0.0291063	FOS/PGK1/BNIP3L/INHBA	4
GO:0048002	antigen processing and presentation of peptide antigen	3/42	72/18986	0.0416667	18.8353	7.1392	0.000539867	0.0361184	0.0291063	CD74/CTSL/B2M	3
GO:0006935	chemotaxis	6/42	472/18986	0.0127119	5.74637	4.91673	0.000561443	0.0361184	0.0291063	TMSB4X/CCL18/ARRB2/HBEGF/CD74/DUSP1	6
GO:0002468	dendritic cell antigen processing and presentation	2/42	16/18986	0.125	56.506	10.4583	0.000562123	0.0361184	0.0291063	CD74/CD68	2
GO:0006879	intracellular iron ion homeostasis	3/42	73/18986	0.0410959	18.5773	7.0848	0.000562141	0.0361184	0.0291063	FTH1/FTL/B2M	3
GO:0042330	taxis	6/42	474/18986	0.0126582	5.72212	4.90223	0.000574068	0.0361184	0.0291063	TMSB4X/CCL18/ARRB2/HBEGF/CD74/DUSP1	6
GO:0071453	cellular response to oxygen levels	4/42	178/18986	0.0224719	10.1584	5.78031	0.000633047	0.0382361	0.0308127	FOS/PGK1/BNIP3L/INHBA	4
Table S19: Go Enrichment Analysis (CC) of the Top30 Genes in DC of the Training set (pvalueCutoff = 0.05, qvalueCutoff = 0.2)
ID	Description	GeneRatio	BgRatio	RichFactor	FoldEnrichment	zScore	pvalue	p.adjust	qvalue	geneID	Count
GO:0030139	endocytic vesicle	9/42	356/19960	0.0252809	12.0144	9.62912	4.38197e-08	6.57295e-06	4.01296e-06	VIM/CYBA/ARRB2/UBB/HBEGF/CD74/CTSL/B2M/UBA52	9
GO:0030666	endocytic vesicle membrane	7/42	207/19960	0.0338164	16.0709	10.0087	2.31172e-07	1.73379e-05	1.05852e-05	CYBA/ARRB2/UBB/HBEGF/CD74/B2M/UBA52	7
GO:1904724	tertiary granule lumen	4/42	55/19960	0.0727273	34.5628	11.4454	5.34223e-06	0.000267112	0.000163079	FTH1/CSTB/ASAH1/B2M	4
GO:0070820	tertiary granule	5/42	164/19960	0.0304878	14.489	7.96495	2.34373e-05	0.0008789	0.000536591	FTH1/CSTB/ASAH1/CYBA/B2M	5
GO:0005774	vacuolar membrane	7/42	491/19960	0.0142566	6.77529	5.94996	6.68236e-05	0.00200471	0.00122393	THBD/CD74/CD68/GABARAPL1/B4GALT1/B2M/UBA52	7
GO:0005741	mitochondrial outer membrane	5/42	223/19960	0.0224215	10.6556	6.65826	0.000101096	0.0025274	0.00154304	UBB/ACSL1/PPP1R15A/BNIP3L/UBA52	5
GO:0031968	organelle outer membrane	5/42	252/19960	0.0198413	9.42933	6.18362	0.00017907	0.00348326	0.00212662	UBB/ACSL1/PPP1R15A/BNIP3L/UBA52	5
GO:0019867	outer membrane	5/42	254/19960	0.019685	9.35508	6.15374	0.000185774	0.00348326	0.00212662	UBB/ACSL1/PPP1R15A/BNIP3L/UBA52	5
GO:0044754	autolysosome	2/42	15/19960	0.133333	63.3651	11.0954	0.000446047	0.0066123	0.00403698	FTH1/FTL	2
GO:0005775	vacuolar lumen	4/42	178/19960	0.0224719	10.6795	5.95661	0.000525305	0.0066123	0.00403698	FTL/ASAH1/CD74/CTSL	4
GO:0034774	secretory granule lumen	5/42	324/19960	0.0154321	7.33392	5.27825	0.000567966	0.0066123	0.00403698	FTL/TMSB4X/CSTB/S100A11/B2M	5
GO:0042613	MHC class II protein complex	2/42	17/19960	0.117647	55.9104	10.4005	0.000576197	0.0066123	0.00403698	CD74/B2M	2
GO:0060205	cytoplasmic vesicle lumen	5/42	329/19960	0.0151976	7.22246	5.22589	0.000608736	0.0066123	0.00403698	FTL/TMSB4X/CSTB/S100A11/B2M	5
GO:0031983	vesicle lumen	5/42	330/19960	0.0151515	7.20058	5.21555	0.000617148	0.0066123	0.00403698	FTL/TMSB4X/CSTB/S100A11/B2M	5
GO:0005767	secondary lysosome	2/42	23/19960	0.0869565	41.3251	8.88546	0.00106335	0.0106335	0.00649203	FTH1/FTL	2
GO:0043202	lysosomal lumen	3/42	98/19960	0.0306122	14.5481	6.17378	0.0011467	0.0107503	0.00656334	ASAH1/CD74/CTSL	3
GO:0042611	MHC protein complex	2/42	25/19960	0.08	38.019	8.50469	0.00125753	0.0110959	0.00677432	CD74/B2M	2
GO:0005776	autophagosome	3/42	118/19960	0.0254237	12.0823	5.54435	0.00195455	0.0157965	0.00964418	FTH1/FTL/GABARAPL1	3
GO:0062023	collagen-containing extracellular matrix	5/42	430/19960	0.0116279	5.52602	4.35684	0.00200089	0.0157965	0.00964418	CSTB/S100A10/CTSL/C1QA/S100A6	5
GO:1904813	ficolin-1-rich granule lumen	3/42	124/19960	0.0241935	11.4977	5.38454	0.00225119	0.0161468	0.00985805	FTH1/CSTB/ASAH1	3
GO:0005765	lysosomal membrane	5/42	447/19960	0.0111857	5.31586	4.2377	0.0023682	0.0161468	0.00985805	CD74/CD68/B4GALT1/B2M/UBA52	5
GO:0098852	lytic vacuole membrane	5/42	447/19960	0.0111857	5.31586	4.2377	0.0023682	0.0161468	0.00985805	CD74/CD68/B4GALT1/B2M/UBA52	5
GO:0016363	nuclear matrix	3/42	129/19960	0.0232558	11.052	5.25955	0.00251865	0.016426	0.0100285	FOS/VIM/S100A10	3
GO:0031904	endosome lumen	2/42	38/19960	0.0526316	25.0125	6.80353	0.00289623	0.0181014	0.0110514	CTSL/B2M	2
GO:0045335	phagocytic vesicle	3/42	145/19960	0.0206897	9.83251	4.90165	0.00350367	0.021022	0.0128345	VIM/CYBA/B2M	3
GO:0005766	primary lysosome	3/42	155/19960	0.0193548	9.19816	4.70507	0.00422364	0.0226267	0.0138142	FTL/CD68/B4GALT1	3
GO:0034399	nuclear periphery	3/42	155/19960	0.0193548	9.19816	4.70507	0.00422364	0.0226267	0.0138142	FOS/VIM/S100A10	3
GO:0042582	azurophil granule	3/42	155/19960	0.0193548	9.19816	4.70507	0.00422364	0.0226267	0.0138142	FTL/CD68/B4GALT1	3
GO:0005770	late endosome	4/42	318/19960	0.0125786	5.97784	4.10897	0.00439382	0.0227267	0.0138752	CD74/CTSL/CD68/B2M	4
GO:0008287	protein serine/threonine phosphatase complex	2/42	55/19960	0.0363636	17.2814	5.55217	0.00598122	0.0289414	0.0176695	PPP1R15A/PPP4C	2
GO:1903293	phosphatase complex	2/42	55/19960	0.0363636	17.2814	5.55217	0.00598122	0.0289414	0.0176695	PPP1R15A/PPP4C	2
GO:0035577	azurophil granule membrane	2/42	58/19960	0.0344828	16.3875	5.38897	0.00663142	0.0304287	0.0185775	CD68/B4GALT1	2
GO:0001726	ruffle	3/42	185/19960	0.0162162	7.70656	4.20822	0.00689718	0.0304287	0.0185775	S100A11/S100A6/LCP1	3
GO:0101002	ficolin-1-rich granule	3/42	185/19960	0.0162162	7.70656	4.20822	0.00689718	0.0304287	0.0185775	FTH1/CSTB/ASAH1	3
GO:0012507	ER to Golgi transport vesicle membrane	2/42	64/19960	0.03125	14.8512	5.09642	0.00802356	0.0343867	0.020994	CD74/B2M	2
GO:0005771	multivesicular body	2/42	68/19960	0.0294118	13.9776	4.92244	0.00901835	0.037018	0.0226005	CD74/CTSL	2
GO:0030662	coated vesicle membrane	3/42	205/19960	0.0146341	6.9547	3.93523	0.00913111	0.037018	0.0226005	HBEGF/CD74/B2M	3
GO:0009897	external side of plasma membrane	4/42	407/19960	0.00982801	4.67064	3.43561	0.0103508	0.0408584	0.0249451	THBD/CD74/B4GALT1/B2M	4
GO:0030669	clathrin-coated endocytic vesicle membrane	2/42	75/19960	0.0266667	12.673	4.65074	0.0108845	0.0418635	0.0255588	HBEGF/CD74	2
GO:0031252	cell leading edge	4/42	433/19960	0.00923788	4.39019	3.27508	0.0127622	0.047217	0.0288272	VIM/S100A11/S100A6/LCP1	4
GO:0030670	phagocytic vesicle membrane	2/42	82/19960	0.0243902	11.5912	4.41302	0.012906	0.047217	0.0288272	CYBA/B2M	2
Table S19: Go Enrichment Analysis (MF) of the Top30 Genes in DC Cells of the Training set (pvalueCutoff = 0.05, qvalueCutoff = 0.2)
ID	Description	GeneRatio	BgRatio	RichFactor	FoldEnrichment	zScore	pvalue	p.adjust	qvalue	geneID	Count
GO:0008199	ferric iron binding	2/42	11/18737	0.181818	81.1126	12.5972	0.000266351	0.0194175	0.0145501	FTH1/FTL	2
GO:0031386	protein tag activity	2/42	14/18737	0.142857	63.7313	11.1291	0.000438814	0.0194175	0.0145501	UBB/UBA52	2
GO:0044548	S100 protein binding	2/42	14/18737	0.142857	63.7313	11.1291	0.000438814	0.0194175	0.0145501	S100A11/S100A6	2
GO:0141047	molecular tag activity	2/42	14/18737	0.142857	63.7313	11.1291	0.000438814	0.0194175	0.0145501	UBB/UBA52	2
GO:0048306	calcium-dependent protein binding	3/42	79/18737	0.0379747	16.9412	6.72982	0.00073565	0.026042	0.0195141	S100A10/S100A11/S100A6	3
GO:0008198	ferrous iron binding	2/42	26/18737	0.0769231	34.3168	8.05754	0.0015407	0.0420145	0.0314828	FTH1/FTL	2
GO:0023026	MHC class II protein complex binding	2/42	27/18737	0.0740741	33.0459	7.898	0.00166159	0.0420145	0.0314828	CD74/B2M	2

## Sheet: Table S19(GO_TOP30_FI)
Table S19: Go Enrichment Analysis (BP) of the Top30 Genes in Fibrotic cells of the Training set (pvalueCutoff = 0.05, qvalueCutoff = 0.2)
ID	Description	GeneRatio	BgRatio	RichFactor	FoldEnrichment	zScore	pvalue	p.adjust	qvalue	geneID	Count
GO:0048260	positive regulation of receptor-mediated endocytosis	3/26	56/18986	0.0535714	39.1195	10.5789	6.02241e-05	0.0311019	0.0225145	B2M/CCL21/CD63	3
GO:0006826	iron ion transport	3/26	58/18986	0.0517241	37.7706	10.3857	6.69157e-05	0.0311019	0.0225145	FTL/FTH1/B2M	3
GO:0008217	regulation of blood pressure	4/26	190/18986	0.0210526	15.3733	7.37348	0.000122263	0.0311019	0.0225145	COL1A2/SGK1/SCPEP1/IER3	4
GO:0006879	intracellular iron ion homeostasis	3/26	73/18986	0.0410959	30.0095	9.1959	0.000133056	0.0311019	0.0225145	FTL/FTH1/B2M	3
Table S19: Go Enrichment Analysis (CC) of the Top30 Genes in Fibrotic cells of the Training set (pvalueCutoff = 0.05, qvalueCutoff = 0.2)
ID	Description	GeneRatio	BgRatio	RichFactor	FoldEnrichment	zScore	pvalue	p.adjust	qvalue	geneID	Count
GO:0034774	secretory granule lumen	6/25	324/19960	0.0185185	14.7852	8.85911	2.38448e-06	9.89756e-05	6.04644e-05	FN1/CSTB/TMSB4X/FTL/B2M/LGALS3BP	6
GO:0060205	cytoplasmic vesicle lumen	6/25	329/19960	0.0182371	14.5605	8.78281	2.60507e-06	9.89756e-05	6.04644e-05	FN1/CSTB/TMSB4X/FTL/B2M/LGALS3BP	6
GO:0031983	vesicle lumen	6/25	330/19960	0.0181818	14.5164	8.76775	2.65113e-06	9.89756e-05	6.04644e-05	FN1/CSTB/TMSB4X/FTL/B2M/LGALS3BP	6
GO:1904724	tertiary granule lumen	3/25	55/19960	0.0545455	43.5491	11.1898	4.36186e-05	0.00122132	0.000746108	CSTB/FTH1/B2M	3
GO:0044754	autolysosome	2/25	15/19960	0.133333	106.453	14.4684	0.000156568	0.00350713	0.00214251	FTL/FTH1	2
GO:0042827	platelet dense granule	2/25	21/19960	0.0952381	76.0381	12.1835	0.000311697	0.00560977	0.00342702	LGALS3BP/CD63	2
GO:0005767	secondary lysosome	2/25	23/19960	0.0869565	69.4261	11.6275	0.000374945	0.00560977	0.00342702	FTL/FTH1	2
GO:0140534	endoplasmic reticulum protein-containing complex	3/25	116/19960	0.0258621	20.6483	7.51571	0.000400698	0.00560977	0.00342702	SPCS3/B2M/EMC7	3
GO:0005788	endoplasmic reticulum lumen	4/25	314/19960	0.0127389	10.1707	5.80045	0.000585441	0.00728549	0.00445072	COL1A2/FN1/B2M/NUCB1	4
GO:0072562	blood microparticle	3/25	144/19960	0.0208333	16.6333	6.66739	0.000752845	0.00843187	0.00515105	FN1/LGALS3BP/IGHA1	3
GO:0031904	endosome lumen	2/25	38/19960	0.0526316	42.0211	8.96321	0.00102992	0.0102361	0.00625327	B2M/CD63	2
GO:0070820	tertiary granule	3/25	164/19960	0.0182927	14.6049	6.19525	0.00109673	0.0102361	0.00625327	CSTB/FTH1/B2M	3
GO:0031902	late endosome membrane	3/25	175/19960	0.0171429	13.6869	5.96948	0.00132204	0.0113899	0.00695812	B2M/PLD3/CD63	3
GO:0005925	focal adhesion	4/25	424/19960	0.00943396	7.53208	4.81446	0.00178276	0.0134491	0.0082161	B2M/VIM/AHNAK/IQGAP1	4
GO:0062023	collagen-containing extracellular matrix	4/25	430/19960	0.00930233	7.42698	4.77113	0.00187668	0.0134491	0.0082161	COL1A2/FN1/CSTB/LGALS3BP	4
GO:0030055	cell-substrate junction	4/25	434/19960	0.00921659	7.35853	4.7427	0.00194118	0.0134491	0.0082161	B2M/VIM/AHNAK/IQGAP1	4
GO:0005765	lysosomal membrane	4/25	447/19960	0.00894855	7.14452	4.65276	0.00216147	0.0134491	0.0082161	B2M/PLD3/AHNAK/CD63	4
GO:0098852	lytic vacuole membrane	4/25	447/19960	0.00894855	7.14452	4.65276	0.00216147	0.0134491	0.0082161	B2M/PLD3/AHNAK/CD63	4
GO:0005774	vacuolar membrane	4/25	491/19960	0.00814664	6.50428	4.37321	0.0030356	0.0177408	0.0108379	B2M/PLD3/AHNAK/CD63	4
GO:0031093	platelet alpha granule lumen	2/25	67/19960	0.0298507	23.8328	6.62946	0.003168	0.0177408	0.0108379	FN1/TMSB4X	2
GO:0031091	platelet alpha granule	2/25	91/19960	0.021978	17.5473	5.6026	0.00576071	0.0307238	0.0187692	FN1/TMSB4X	2
GO:0005770	late endosome	3/25	318/19960	0.00943396	7.53208	4.15818	0.00710616	0.0361768	0.0221005	B2M/PLD3/CD63	3
GO:0005776	autophagosome	2/25	118/19960	0.0169492	13.5322	4.83512	0.00951269	0.0463227	0.0282986	FTL/FTH1	2
GO:1904813	ficolin-1-rich granule lumen	2/25	124/19960	0.016129	12.8774	4.69826	0.010461	0.0488181	0.0298231	CSTB/FTH1	2
GO:0016363	nuclear matrix	2/25	129/19960	0.0155039	12.3783	4.59125	0.0112821	0.0498299	0.0304412	VIM/FOS	2
GO:0005793	endoplasmic reticulum-Golgi intermediate compartment	2/25	135/19960	0.0148148	11.8281	4.47039	0.0123039	0.0498299	0.0304412	FN1/NUCB1	2
GO:0071745	IgA immunoglobulin complex	1/25	10/19960	0.1	79.84	8.83093	0.0124575	0.0498299	0.0304412	IGHA1	1
GO:0072546	EMC complex	1/25	10/19960	0.1	79.84	8.83093	0.0124575	0.0498299	0.0304412	EMC7	1
Table S19: Go Enrichment Analysis (MF) of the Top30 Genes in Fibrotic cells of the Training set (pvalueCutoff = 0.05, qvalueCutoff = 0.2)
ID	Description	GeneRatio	BgRatio	RichFactor	FoldEnrichment	zScore	pvalue	p.adjust	qvalue	geneID	Count
GO:0008199	ferric iron binding	2/26	11/18737	0.181818	131.028	16.08	0.000101056	0.0113406	0.0082509	FTL/FTH1	2
GO:0044548	S100 protein binding	2/26	14/18737	0.142857	102.951	14.2247	0.000166773	0.0113406	0.0082509	AHNAK/IQGAP1	2
GO:0008198	ferrous iron binding	2/26	26/18737	0.0769231	55.4349	10.3536	0.000589551	0.0267263	0.0194448	FTL/FTH1	2
GO:0002020	protease binding	3/26	136/18737	0.0220588	15.8968	6.49935	0.000860556	0.0292589	0.0212874	COL1A2/FN1/CSTB	3

## Sheet: Table S19(GO_TOP30_NE)
Table S19: Go Enrichment Analysis (BP) of the Top30 Genes in Neutrophils of the Training set (pvalueCutoff = 0.05, qvalueCutoff = 0.2)
ID	Description	GeneRatio	BgRatio	RichFactor	FoldEnrichment	zScore	pvalue	p.adjust	qvalue	geneID	Count
GO:0006826	iron ion transport	3/25	58/18986	0.0517241	39.2814	10.6021	5.93233e-05	0.0148106	0.0093842	FTL/FTH1/B2M	3
GO:0060326	cell chemotaxis	5/25	328/18986	0.0152439	11.5768	7.01624	5.96839e-05	0.0148106	0.0093842	S100A12/CXCL8/TMSB4X/S100A8/LYN	5
GO:0032496	response to lipopolysaccharide	5/25	354/18986	0.0141243	10.7266	6.70773	8.56058e-05	0.0148106	0.0093842	CXCL8/S100A8/B2M/PELI1/LYN	5
GO:0042989	sequestering of actin monomers	2/25	11/18986	0.181818	138.08	16.5129	9.08892e-05	0.0148106	0.0093842	TMSB4X/TMSB10	2
GO:0002237	response to molecule of bacterial origin	5/25	375/18986	0.0133333	10.1259	6.48111	0.000112272	0.0148106	0.0093842	CXCL8/S100A8/B2M/PELI1/LYN	5
GO:0006879	intracellular iron ion homeostasis	3/25	73/18986	0.0410959	31.2099	9.3902	0.000118029	0.0148106	0.0093842	FTL/FTH1/B2M	3
GO:1901741	positive regulation of myoblast fusion	2/25	15/18986	0.133333	101.259	14.1048	0.000172956	0.0148106	0.0093842	SCGB3A1/CD53	2
GO:0035023	regulation of Rho protein signal transduction	3/25	84/18986	0.0357143	27.1229	8.71267	0.000179101	0.0148106	0.0093842	CDC42SE1/AKAP13/ARHGDIB	3
GO:0030593	neutrophil chemotaxis	3/25	85/18986	0.0352941	26.8038	8.65755	0.000185492	0.0148106	0.0093842	S100A12/CXCL8/S100A8	3
GO:0051651	maintenance of location in cell	4/25	224/18986	0.0178571	13.5614	6.86702	0.000196397	0.0148106	0.0093842	TMSB4X/S100A8/TMSB10/LYN	4
GO:1900120	regulation of receptor binding	2/25	16/18986	0.125	94.93	13.6482	0.000197505	0.0148106	0.0093842	ANXA2/B2M	2
GO:0050672	negative regulation of lymphocyte proliferation	3/25	90/18986	0.0333333	25.3147	8.39555	0.000219674	0.0148106	0.0093842	LST1/PELI1/LYN	3
GO:0032945	negative regulation of mononuclear cell proliferation	3/25	92/18986	0.0326087	24.7643	8.29665	0.000234413	0.0148106	0.0093842	LST1/PELI1/LYN	3
GO:0030595	leukocyte chemotaxis	4/25	240/18986	0.0166667	12.6573	6.59926	0.00025563	0.0148106	0.0093842	S100A12/CXCL8/S100A8/LYN	4
GO:0097529	myeloid leukocyte migration	4/25	243/18986	0.0164609	12.5011	6.55189	0.000268023	0.0148106	0.0093842	S100A12/CXCL8/S100A8/LYN	4
GO:0002274	myeloid leukocyte activation	4/25	247/18986	0.0161943	12.2986	6.49001	0.000285213	0.0148106	0.0093842	S100A12/CXCL8/IFNGR1/LYN	4
GO:0070664	negative regulation of leukocyte proliferation	3/25	99/18986	0.030303	23.0133	7.97382	0.000291007	0.0148106	0.0093842	LST1/PELI1/LYN	3
GO:1901739	regulation of myoblast fusion	2/25	20/18986	0.1	75.944	12.1761	0.000311708	0.0148106	0.0093842	SCGB3A1/CD53	2
GO:0000041	transition metal ion transport	3/25	102/18986	0.0294118	22.3365	7.8455	0.000317731	0.0148106	0.0093842	FTL/FTH1/B2M	3
GO:0006935	chemotaxis	5/25	472/18986	0.0105932	8.04492	5.62783	0.000327285	0.0148106	0.0093842	S100A12/CXCL8/TMSB4X/S100A8/LYN	5
GO:0042330	taxis	5/25	474/18986	0.0105485	8.01097	5.61287	0.000333716	0.0148106	0.0093842	S100A12/CXCL8/TMSB4X/S100A8/LYN	5
GO:1990266	neutrophil migration	3/25	108/18986	0.0277778	21.0956	7.60464	0.000375829	0.0159215	0.010088	S100A12/CXCL8/S100A8	3
GO:0060143	positive regulation of syncytium formation by plasma membrane fusion	2/25	23/18986	0.0869565	66.0383	11.3325	0.00041406	0.0167784	0.010631	SCGB3A1/CD53	2
GO:1902993	positive regulation of amyloid precursor protein catabolic process	2/25	27/18986	0.0740741	56.2548	10.4325	0.000572595	0.0222358	0.0140889	IFNGR1/LYN	2
GO:0071621	granulocyte chemotaxis	3/25	129/18986	0.0232558	17.6614	6.89469	0.000631779	0.0226836	0.0143726	S100A12/CXCL8/S100A8	3
GO:0043122	regulation of canonical NF-kappaB signal transduction	4/25	305/18986	0.0131148	9.95987	5.72791	0.000632803	0.0226836	0.0143726	S100A12/TMSB4X/AKAP13/PELI1	4
GO:0060142	regulation of syncytium formation by plasma membrane fusion	2/25	29/18986	0.0689655	52.3752	10.0534	0.00066125	0.0228254	0.0144624	SCGB3A1/CD53	2
GO:0021782	glial cell development	3/25	136/18986	0.0220588	16.7524	6.69428	0.000736718	0.0236766	0.0150018	S100A8/IFNGR1/LYN	3
GO:0061844	antimicrobial humoral immune response mediated by antimicrobial peptide	3/25	136/18986	0.0220588	16.7524	6.69428	0.000736718	0.0236766	0.0150018	S100A12/CXCL8/B2M	3
GO:0007266	Rho protein signal transduction	3/25	139/18986	0.0215827	16.3908	6.6129	0.000784888	0.0243839	0.0154499	CDC42SE1/AKAP13/ARHGDIB	3
GO:0007249	canonical NF-kappaB signal transduction	4/25	327/18986	0.0122324	9.28979	5.49057	0.000821043	0.0246843	0.0156402	S100A12/TMSB4X/AKAP13/PELI1	4
GO:0070661	leukocyte proliferation	4/25	341/18986	0.0117302	8.90839	5.35092	0.000959687	0.0279509	0.01771	JUNB/LST1/PELI1/LYN	4
GO:0051235	maintenance of location	4/25	345/18986	0.0115942	8.8051	5.31249	0.00100216	0.0279683	0.017721	TMSB4X/S100A8/TMSB10/LYN	4
GO:0034143	regulation of toll-like receptor 4 signaling pathway	2/25	36/18986	0.0555556	42.1911	8.98245	0.0010203	0.0279683	0.017721	PELI1/LYN	2
GO:0097530	granulocyte migration	3/25	156/18986	0.0192308	14.6046	6.19538	0.00109589	0.0291819	0.01849	S100A12/CXCL8/S100A8	3
GO:0051250	negative regulation of lymphocyte activation	3/25	169/18986	0.0177515	13.4812	5.91791	0.00137977	0.0357206	0.022633	LST1/PELI1/LYN	3
GO:0014002	astrocyte development	2/25	44/18986	0.0454545	34.52	8.08281	0.00152222	0.0383436	0.0242949	S100A8/IFNGR1	2
GO:0050863	regulation of T cell activation	4/25	393/18986	0.0101781	7.72967	4.89508	0.00162057	0.0392143	0.0248466	JUNB/B2M/PELI1/LYN	4
GO:0045646	regulation of erythrocyte differentiation	2/25	46/18986	0.0434783	33.0191	7.89484	0.00166275	0.0392143	0.0248466	B2M/LYN	2
GO:0062207	regulation of pattern recognition receptor signaling pathway	3/25	184/18986	0.0163043	12.3822	5.63348	0.0017603	0.0392143	0.0248466	S100A8/PELI1/LYN	3
GO:0019730	antimicrobial humoral response	3/25	185/18986	0.0162162	12.3152	5.6157	0.00178776	0.0392143	0.0248466	S100A12/CXCL8/B2M	3
GO:0050900	leukocyte migration	4/25	404/18986	0.00990099	7.51921	4.80932	0.00179295	0.0392143	0.0248466	S100A12/CXCL8/S100A8/LYN	4
GO:0007520	myoblast fusion	2/25	48/18986	0.0416667	31.6433	7.71852	0.00180924	0.0392143	0.0248466	SCGB3A1/CD53	2
GO:0032092	positive regulation of protein binding	2/25	49/18986	0.0408163	30.9976	7.63437	0.00188471	0.0399216	0.0252948	ANXA2/B2M	2
GO:0002695	negative regulation of leukocyte activation	3/25	196/18986	0.0153061	11.6241	5.42876	0.00210776	0.0436541	0.0276598	LST1/PELI1/LYN	3
GO:0007159	leukocyte cell-cell adhesion	4/25	430/18986	0.00930233	7.06456	4.61887	0.00225057	0.0452945	0.0286992	S100A8/B2M/PELI1/LYN	4
GO:0002548	monocyte chemotaxis	2/25	54/18986	0.037037	28.1274	7.24856	0.00228417	0.0452945	0.0286992	S100A12/LYN	2
GO:0050727	regulation of inflammatory response	4/25	438/18986	0.00913242	6.93553	4.56344	0.00240626	0.0457462	0.0289854	S100A12/TMSB4X/S100A8/LYN	4
GO:0048260	positive regulation of receptor-mediated endocytosis	2/25	56/18986	0.0357143	27.1229	7.1086	0.0024542	0.0457462	0.0289854	ANXA2/B2M	2
GO:1902991	regulation of amyloid precursor protein catabolic process	2/25	56/18986	0.0357143	27.1229	7.1086	0.0024542	0.0457462	0.0289854	IFNGR1/LYN	2
GO:0052372	modulation by symbiont of entry into host	2/25	58/18986	0.0344828	26.1876	6.97578	0.00263004	0.0479435	0.0303776	CXCL8/IFITM2	2
GO:0030099	myeloid cell differentiation	4/25	451/18986	0.00886918	6.73561	4.47627	0.00267496	0.0479435	0.0303776	JUNB/ANXA2/B2M/LYN	4
GO:0050920	regulation of chemotaxis	3/25	216/18986	0.0138889	10.5478	5.12438	0.00277658	0.0488258	0.0309366	CXCL8/TMSB4X/LYN	3
GO:0050866	negative regulation of cell activation	3/25	219/18986	0.0136986	10.4033	5.08217	0.00288692	0.0496777	0.0314764	LST1/PELI1/LYN	3
GO:0000768	syncytium formation by plasma membrane fusion	2/25	62/18986	0.0322581	24.4981	6.72924	0.00299904	0.0496777	0.0314764	SCGB3A1/CD53	2
GO:0140253	cell-cell fusion	2/25	62/18986	0.0322581	24.4981	6.72924	0.00299904	0.0496777	0.0314764	SCGB3A1/CD53	2
GO:0043123	positive regulation of canonical NF-kappaB signal transduction	3/25	223/18986	0.0134529	10.2167	5.02714	0.00303823	0.0496777	0.0314764	S100A12/AKAP13/PELI1	3
Table S19: Go Enrichment Analysis (CC) of the Top30 Genes in Neutrophils of the Training set (pvalueCutoff = 0.05, qvalueCutoff = 0.2)
ID	Description	GeneRatio	BgRatio	RichFactor	FoldEnrichment	zScore	pvalue	p.adjust	qvalue	geneID	Count
GO:0034774	secretory granule lumen	6/26	324/19960	0.0185185	14.2165	8.66208	3.05768e-06	0.000120089	8.94405e-05	FTL/S100A12/TMSB4X/S100A8/ANXA2/B2M	6
GO:0060205	cytoplasmic vesicle lumen	6/26	329/19960	0.0182371	14.0005	8.58706	3.33984e-06	0.000120089	8.94405e-05	FTL/S100A12/TMSB4X/S100A8/ANXA2/B2M	6
GO:0031983	vesicle lumen	6/26	330/19960	0.0181818	13.958	8.57225	3.39874e-06	0.000120089	8.94405e-05	FTL/S100A12/TMSB4X/S100A8/ANXA2/B2M	6
GO:0044754	autolysosome	2/26	15/19960	0.133333	102.359	14.1824	0.000169542	0.00449286	0.00334622	FTL/FTH1	2
GO:0005767	secondary lysosome	2/26	23/19960	0.0869565	66.7559	11.3953	0.000405905	0.00860519	0.00640903	FTL/FTH1	2
GO:0070820	tertiary granule	3/26	164/19960	0.0182927	14.0432	6.05724	0.00123234	0.0217713	0.016215	FTH1/CD53/B2M	3
GO:0031902	late endosome membrane	3/26	175/19960	0.0171429	13.1604	5.83525	0.00148491	0.0224857	0.0167471	ANXA2/B2M/IFITM2	3
GO:1904724	tertiary granule lumen	2/26	55/19960	0.0363636	27.9161	7.2189	0.00232226	0.0266039	0.0198142	FTH1/B2M	2
GO:0005765	lysosomal membrane	4/26	447/19960	0.00894855	6.86973	4.53282	0.0025098	0.0266039	0.0198142	ANXA2/B2M/IFITM2/LYN	4
GO:0098852	lytic vacuole membrane	4/26	447/19960	0.00894855	6.86973	4.53282	0.0025098	0.0266039	0.0198142	ANXA2/B2M/IFITM2/LYN	4
GO:0005774	vacuolar membrane	4/26	491/19960	0.00814664	6.25411	4.25723	0.00351871	0.0339075	0.0252539	ANXA2/B2M/IFITM2/LYN	4
Table S19: Go Enrichment Analysis (MF) of the Top30 Genes in Neutrophils of the Training set (pvalueCutoff = 0.05, qvalueCutoff = 0.2)
ID	Description	GeneRatio	BgRatio	RichFactor	FoldEnrichment	zScore	pvalue	p.adjust	qvalue	geneID	Count
GO:0008199	ferric iron binding	2/24	11/18737	0.181818	141.947	16.7456	8.58745e-05	0.00450841	0.00302821	FTL/FTH1	2
GO:0050786	RAGE receptor binding	2/24	11/18737	0.181818	141.947	16.7456	8.58745e-05	0.00450841	0.00302821	S100A12/S100A8	2
GO:0048306	calcium-dependent protein binding	3/24	79/18737	0.0379747	29.6472	9.13766	0.000136976	0.00479418	0.00322015	S100A12/S100A8/ANXA2	3
GO:0008198	ferrous iron binding	2/24	26/18737	0.0769231	60.0545	10.791	0.00050152	0.0113057	0.00759382	FTL/FTH1	2
GO:0003785	actin monomer binding	2/24	29/18737	0.0689655	53.842	10.1985	0.000625046	0.0113057	0.00759382	TMSB4X/TMSB10	2
GO:0051020	GTPase binding	4/24	316/18737	0.0126582	9.88238	5.70281	0.000646041	0.0113057	0.00759382	CDC42SE1/AKAP13/LCP1/ARHGDIB	4
GO:0140313	molecular sequestering activity	2/24	54/18737	0.037037	28.9151	7.35674	0.00216044	0.0324066	0.0217668	FTH1/TMSB4X	2

## Sheet: Table S19(GO_TOP30_EN)
BP were not enriched (the Top30 Genes in Endothelial Cells of the Training set)
Table S19: Go Enrichment Analysis (CC) of the Top30 Genes in Endothelial of the Training set (pvalueCutoff = 1, qvalueCutoff = 1)
ID	Description	GeneRatio	BgRatio	RichFactor	FoldEnrichment	zScore	pvalue	p.adjust	qvalue	geneID	Count
GO:0062023	collagen-containing extracellular matrix	4/29	430/19960	0.00930233	6.40257	4.32003	0.00329263	0.18768	0.16983	THBS2/MDK/SFRP2/CPA3	4
GO:1990909	Wnt signalosome	1/29	13/19960	0.0769231	52.9443	7.14619	0.0187296	0.318729	0.288416	LRP5	1
GO:0035145	exon-exon junction complex	1/29	21/19960	0.047619	32.775	5.5571	0.0300866	0.318729	0.288416	TDRD3	1
GO:0044305	calyx of Held	1/29	21/19960	0.047619	32.775	5.5571	0.0300866	0.318729	0.288416	ACTG1	1
GO:0032585	multivesicular body membrane	1/29	29/19960	0.0344828	23.7337	4.67313	0.0413167	0.318729	0.288416	NDFIP2	1
GO:0031941	filamentous actin	1/29	32/19960	0.03125	21.5086	4.42877	0.0454956	0.318729	0.288416	ACTG1	1
GO:0035267	NuA4 histone acetyltransferase complex	1/29	32/19960	0.03125	21.5086	4.42877	0.0454956	0.318729	0.288416	ACTG1	1
GO:0043189	H4/H2A histone acetyltransferase complex	1/29	32/19960	0.03125	21.5086	4.42877	0.0454956	0.318729	0.288416	ACTG1	1
GO:1902562	H4 histone acetyltransferase complex	1/29	45/19960	0.0222222	15.295	3.66188	0.0634015	0.318729	0.288416	ACTG1	1
GO:0005782	peroxisomal matrix	1/29	52/19960	0.0192308	13.2361	3.37003	0.0729084	0.318729	0.288416	NUDT12	1
GO:0031907	microbody lumen	1/29	52/19960	0.0192308	13.2361	3.37003	0.0729084	0.318729	0.288416	NUDT12	1
GO:0005879	axonemal microtubule	1/29	57/19960	0.0175439	12.075	3.19394	0.0796419	0.318729	0.288416	ARL6	1
GO:0005771	multivesicular body	1/29	68/19960	0.0147059	10.1217	2.87405	0.0942898	0.318729	0.288416	NDFIP2	1
GO:0031091	platelet alpha granule	1/29	91/19960	0.010989	7.56347	2.3937	0.124193	0.318729	0.288416	THBS2	1
GO:0005604	basement membrane	1/29	92/19960	0.0108696	7.48126	2.37673	0.125472	0.318729	0.288416	THBS2	1
GO:0032580	Golgi cisterna membrane	1/29	93/19960	0.0107527	7.40082	2.36001	0.126748	0.318729	0.288416	CHPF	1
GO:0000123	histone acetyltransferase complex	1/29	95/19960	0.0105263	7.24501	2.32731	0.129296	0.318729	0.288416	ACTG1	1
GO:0030117	membrane coat	1/29	97/19960	0.0103093	7.09563	2.29554	0.131836	0.318729	0.288416	ARL6	1
GO:0048475	coated membrane	1/29	97/19960	0.0103093	7.09563	2.29554	0.131836	0.318729	0.288416	ARL6	1
GO:0098685	Schaffer collateral - CA1 synapse	1/29	99/19960	0.010101	6.95228	2.26467	0.134369	0.318729	0.288416	ACTG1	1
GO:0005902	microvillus	1/29	100/19960	0.01	6.88276	2.24955	0.135633	0.318729	0.288416	AQP5	1
GO:0031248	protein acetyltransferase complex	1/29	105/19960	0.00952381	6.55501	2.17695	0.141926	0.318729	0.288416	ACTG1	1
GO:0005796	Golgi lumen	1/29	106/19960	0.00943396	6.49317	2.163	0.14318	0.318729	0.288416	MUC5B	1
GO:1902493	acetyltransferase complex	1/29	106/19960	0.00943396	6.49317	2.163	0.14318	0.318729	0.288416	ACTG1	1
GO:0045177	apical part of cell	2/29	474/19960	0.00421941	2.90412	1.60039	0.150468	0.318729	0.288416	AQP5/ACTG1	2
GO:0043679	axon terminus	1/29	117/19960	0.00854701	5.8827	2.02047	0.15685	0.318729	0.288416	ACTG1	1
GO:0031985	Golgi cisterna	1/29	118/19960	0.00847458	5.83285	2.00842	0.158082	0.318729	0.288416	CHPF	1
GO:0005881	cytoplasmic microtubule	1/29	122/19960	0.00819672	5.64161	1.96157	0.162994	0.318729	0.288416	ARL6	1
GO:0005884	actin filament	1/29	123/19960	0.00813008	5.59574	1.95018	0.164217	0.318729	0.288416	ACTG1	1
GO:0044306	neuron projection terminus	1/29	133/19960	0.0075188	5.17501	1.84272	0.176358	0.318729	0.288416	ACTG1	1
GO:0072562	blood microparticle	1/29	144/19960	0.00694444	4.77969	1.73634	0.189517	0.318729	0.288416	ACTG1	1
GO:0045335	phagocytic vesicle	1/29	145/19960	0.00689655	4.74673	1.7272	0.190703	0.318729	0.288416	ACTG1	1
GO:0005777	peroxisome	1/29	146/19960	0.00684932	4.71422	1.71815	0.191887	0.318729	0.288416	NUDT12	1
GO:0042579	microbody	1/29	146/19960	0.00684932	4.71422	1.71815	0.191887	0.318729	0.288416	NUDT12	1
GO:0005795	Golgi stack	1/29	151/19960	0.00662252	4.55812	1.6741	0.197785	0.318729	0.288416	CHPF	1
GO:0043296	apical junction complex	1/29	154/19960	0.00649351	4.46932	1.64858	0.201303	0.318729	0.288416	ACTG1	1
GO:0031902	late endosome membrane	1/29	175/19960	0.00571429	3.933	1.48651	0.225517	0.347418	0.314377	NDFIP2	1
GO:0005930	axoneme	1/29	187/19960	0.00534759	3.68062	1.40483	0.239034	0.350989	0.317607	ARL6	1
GO:0097014	ciliary plasm	1/29	188/19960	0.00531915	3.66104	1.39833	0.24015	0.350989	0.317607	ARL6	1
GO:0098858	actin-based cell projection	1/29	234/19960	0.0042735	2.94135	1.13945	0.289815	0.412987	0.373709	AQP5	1
GO:0030016	myofibril	1/29	243/19960	0.00411523	2.83241	1.09625	0.299159	0.415904	0.376349	ACTG1	1
GO:0043292	contractile muscle fiber	1/29	253/19960	0.00395257	2.72046	1.0505	0.309401	0.416853	0.377208	ACTG1	1
GO:0036464	cytoplasmic ribonucleoprotein granule	1/29	258/19960	0.00387597	2.66774	1.02846	0.314468	0.416853	0.377208	NYNRIN	1
GO:0032838	plasma membrane bounded cell projection cytoplasm	1/29	275/19960	0.00363636	2.50282	0.957216	0.331428	0.41798	0.378227	ARL6	1
GO:0035770	ribonucleoprotein granule	1/29	277/19960	0.00361011	2.48475	0.949186	0.333397	0.41798	0.378227	NYNRIN	1
GO:0150034	distal axon	1/29	281/19960	0.00355872	2.44938	0.933336	0.337317	0.41798	0.378227	ACTG1	1
GO:0009925	basal plasma membrane	1/29	298/19960	0.0033557	2.30965	0.868868	0.353731	0.424694	0.384303	AQP5	1
GO:0099568	cytoplasmic region	1/29	311/19960	0.00321543	2.21311	0.822456	0.366017	0.424694	0.384303	ARL6	1
GO:0045178	basal part of cell	1/29	317/19960	0.00315457	2.17122	0.801802	0.371611	0.424694	0.384303	AQP5	1
GO:0005770	late endosome	1/29	318/19960	0.00314465	2.16439	0.798404	0.372539	0.424694	0.384303	NDFIP2	1
GO:0030139	endocytic vesicle	1/29	356/19960	0.00280899	1.93336	0.677806	0.406829	0.454691	0.411447	ACTG1	1
GO:0098791	Golgi apparatus subcompartment	1/29	391/19960	0.00255754	1.7603	0.57915	0.436806	0.478806	0.433269	CHPF	1
GO:0016324	apical plasma membrane	1/29	408/19960	0.00245098	1.68695	0.534766	0.450833	0.484858	0.438745	AQP5	1
GO:0005925	focal adhesion	1/29	424/19960	0.00235849	1.62329	0.494835	0.463727	0.488786	0.4423	ACTG1	1
GO:0030055	cell-substrate junction	1/29	434/19960	0.00230415	1.58589	0.470714	0.471636	0.488786	0.4423	ACTG1	1
GO:0030133	transport vesicle	1/29	453/19960	0.00220751	1.51937	0.426518	0.486355	0.49504	0.447958	CPA3	1
GO:0005874	microtubule	1/29	489/19960	0.00204499	1.40752	0.348025	0.513165	0.513165	0.46436	ARL6	1
Table S19: Go Enrichment Analysis (MF) of the Top30 Genes in Neutrophils of the Training set (pvalueCutoff = 1, qvalueCutoff = 1)
ID	Description	GeneRatio	BgRatio	RichFactor	FoldEnrichment	zScore	pvalue	p.adjust	qvalue	geneID	Count
GO:0017147	Wnt-protein binding	2/30	32/18737	0.0625	39.0354	8.62346	0.00119303	0.0814752	0.0538679	SFRP2/LRP5	2
GO:0016891	RNA endonuclease activity, producing 5'-phosphomonoesters	2/30	34/18737	0.0588235	36.7392	8.35268	0.0013467	0.0814752	0.0538679	NYNRIN/NUDT12	2
GO:0016893	endonuclease activity, active with either ribo- or deoxyribonucleic acids and producing 5'-phosphomonoesters	2/30	43/18737	0.0465116	29.0496	7.37407	0.00214838	0.0866512	0.05729	NYNRIN/NUDT12	2
GO:0031406	carboxylic acid binding	3/30	187/18737	0.0160428	10.0198	4.96412	0.00325721	0.0909175	0.0601107	PC/MDK/NR2F2	3
GO:0043177	organic acid binding	3/30	199/18737	0.0150754	9.41558	4.77943	0.00387884	0.0909175	0.0601107	PC/MDK/NR2F2	3
GO:0004518	nuclease activity	3/30	210/18737	0.0142857	8.92238	4.62338	0.0045083	0.0909175	0.0601107	TATDN3/NYNRIN/NUDT12	3
GO:0004521	RNA endonuclease activity	2/30	73/18737	0.0273973	17.1114	5.52319	0.00606907	0.104908	0.0693608	NYNRIN/NUDT12	2
GO:0033293	monocarboxylic acid binding	2/30	79/18737	0.0253165	15.8118	5.28307	0.00707306	0.105978	0.0700682	PC/NR2F2	2
GO:1901681	sulfur compound binding	3/30	277/18737	0.0108303	6.76426	3.87048	0.00966242	0.105978	0.0700682	PC/THBS2/MDK	3
GO:0000182	rDNA binding	1/30	10/18737	0.1	62.4567	7.78452	0.0159	0.105978	0.0700682	BNC2	1
GO:0005522	profilin binding	1/30	10/18737	0.1	62.4567	7.78452	0.0159	0.105978	0.0700682	ACTG1	1
GO:0015924	mannosyl-oligosaccharide mannosidase activity	1/30	10/18737	0.1	62.4567	7.78452	0.0159	0.105978	0.0700682	MAN1C1	1
GO:0035374	chondroitin sulfate binding	1/30	10/18737	0.1	62.4567	7.78452	0.0159	0.105978	0.0700682	MDK	1
GO:0043121	neurotrophin binding	1/30	10/18737	0.1	62.4567	7.78452	0.0159	0.105978	0.0700682	NTRK3	1
GO:0004540	RNA nuclease activity	2/30	121/18737	0.0165289	10.3234	4.12023	0.0159891	0.105978	0.0700682	NYNRIN/NUDT12	2
GO:0004143	ATP-dependent diacylglycerol kinase activity	1/30	11/18737	0.0909091	56.7788	7.41037	0.0174765	0.105978	0.0700682	DGKA	1
GO:0004523	RNA-DNA hybrid ribonuclease activity	1/30	11/18737	0.0909091	56.7788	7.41037	0.0174765	0.105978	0.0700682	NYNRIN	1
GO:0015217	ADP transmembrane transporter activity	1/30	11/18737	0.0909091	56.7788	7.41037	0.0174765	0.105978	0.0700682	SLC25A23	1
GO:0098973	structural constituent of postsynaptic actin cytoskeleton	1/30	11/18737	0.0909091	56.7788	7.41037	0.0174765	0.105978	0.0700682	ACTG1	1
GO:0004519	endonuclease activity	2/30	127/18737	0.015748	9.8357	4.00098	0.0175171	0.105978	0.0700682	NYNRIN/NUDT12	2
GO:0005347	ATP transmembrane transporter activity	1/30	14/18737	0.0714286	44.6119	6.537	0.0221914	0.120204	0.0794739	SLC25A23	1
GO:0004559	alpha-mannosidase activity	1/30	15/18737	0.0666667	41.6378	6.30516	0.0237581	0.120204	0.0794739	MAN1C1	1
GO:0015250	water channel activity	1/30	16/18737	0.0625	39.0354	6.0951	0.0253224	0.120204	0.0794739	AQP5	1
GO:0015923	mannosidase activity	1/30	16/18737	0.0625	39.0354	6.0951	0.0253224	0.120204	0.0794739	MAN1C1	1
GO:0042813	Wnt receptor activity	1/30	16/18737	0.0625	39.0354	6.0951	0.0253224	0.120204	0.0794739	LRP5	1
GO:0000400	four-way junction DNA binding	1/30	18/18737	0.0555556	34.6981	5.72793	0.0284438	0.120204	0.0794739	HMGB3	1
GO:0008301	DNA binding, bending	1/30	18/18737	0.0555556	34.6981	5.72793	0.0284438	0.120204	0.0794739	HMGB3	1
GO:0005346	purine ribonucleotide transmembrane transporter activity	1/30	19/18737	0.0526316	32.8719	5.56612	0.0300009	0.120204	0.0794739	SLC25A23	1
GO:0005372	water transmembrane transporter activity	1/30	19/18737	0.0526316	32.8719	5.56612	0.0300009	0.120204	0.0794739	AQP5	1
GO:0001972	retinoic acid binding	1/30	20/18737	0.05	31.2283	5.41637	0.0315555	0.120204	0.0794739	NR2F2	1
GO:0061133	endopeptidase activator activity	1/30	20/18737	0.05	31.2283	5.41637	0.0315555	0.120204	0.0794739	SFRP2	1
GO:0008201	heparin binding	2/30	176/18737	0.0113636	7.09735	3.25457	0.0321294	0.120204	0.0794739	THBS2/MDK	2
GO:0008237	metallopeptidase activity	2/30	185/18737	0.0108108	6.75207	3.14856	0.0351971	0.120204	0.0794739	PAPPA/CPA3	2
GO:0000295	adenine nucleotide transmembrane transporter activity	1/30	23/18737	0.0434783	27.1551	5.02613	0.0362051	0.120204	0.0794739	SLC25A23	1
GO:0050699	WW domain binding	1/30	23/18737	0.0434783	27.1551	5.02613	0.0362051	0.120204	0.0794739	NDFIP2	1
GO:0099186	structural constituent of postsynapse	1/30	23/18737	0.0434783	27.1551	5.02613	0.0362051	0.120204	0.0794739	ACTG1	1
GO:0004622	lysophospholipase activity	1/30	24/18737	0.0416667	26.0236	4.91225	0.0377501	0.120204	0.0794739	GDPD3	1
GO:0005315	phosphate transmembrane transporter activity	1/30	24/18737	0.0416667	26.0236	4.91225	0.0377501	0.120204	0.0794739	SLC25A23	1
GO:0015216	purine nucleotide transmembrane transporter activity	1/30	26/18737	0.0384615	24.0218	4.70408	0.040833	0.126687	0.08376	SLC25A23	1
GO:0005543	phospholipid binding	3/30	494/18737	0.00607287	3.79291	2.51924	0.0436875	0.130407	0.0862196	ARL6/DGKA/OSBPL10	3
GO:0001968	fibronectin binding	1/30	30/18737	0.0333333	20.8189	4.35046	0.0469702	0.130407	0.0862196	SFRP2	1
GO:0004181	metallocarboxypeptidase activity	1/30	30/18737	0.0333333	20.8189	4.35046	0.0469702	0.130407	0.0862196	CPA3	1
GO:0015215	nucleotide transmembrane transporter activity	1/30	30/18737	0.0333333	20.8189	4.35046	0.0469702	0.130407	0.0862196	SLC25A23	1
GO:0005452	solute:inorganic anion antiporter activity	1/30	31/18737	0.0322581	20.1473	4.27263	0.0484985	0.130407	0.0862196	SLC25A23	1
GO:0098918	structural constituent of synapse	1/30	31/18737	0.0322581	20.1473	4.27263	0.0484985	0.130407	0.0862196	ACTG1	1
GO:0008376	acetylgalactosaminyltransferase activity	1/30	34/18737	0.0294118	18.3696	4.05948	0.0530694	0.133779	0.088449	CHPF	1
GO:0015020	glucuronosyltransferase activity	1/30	34/18737	0.0294118	18.3696	4.05948	0.0530694	0.133779	0.088449	CHPF	1
GO:0061631	ubiquitin conjugating enzyme activity	1/30	34/18737	0.0294118	18.3696	4.05948	0.0530694	0.133779	0.088449	UBE2D2	1
GO:0005539	glycosaminoglycan binding	2/30	246/18737	0.00813008	5.07778	2.57815	0.0587102	0.140291	0.0927543	THBS2/MDK	2
GO:0005501	retinoid binding	1/30	38/18737	0.0263158	16.436	3.81429	0.0591308	0.140291	0.0927543	NR2F2	1
GO:0019840	isoprenoid binding	1/30	38/18737	0.0263158	16.436	3.81429	0.0591308	0.140291	0.0927543	NR2F2	1
GO:0000217	DNA secondary structure binding	1/30	39/18737	0.025641	16.0145	3.75875	0.0606403	0.141105	0.0932928	HMGB3	1
GO:0061650	ubiquitin-like protein conjugating enzyme activity	1/30	40/18737	0.025	15.6142	3.70523	0.0621475	0.141884	0.0938075	UBE2D2	1
GO:0001727	lipid kinase activity	1/30	41/18737	0.0243902	15.2333	3.6536	0.0636523	0.142628	0.0942997	DGKA	1
GO:0004180	carboxypeptidase activity	1/30	47/18737	0.0212766	13.2887	3.37789	0.0726323	0.159791	0.105647	CPA3	1
GO:0015605	organophosphate ester transmembrane transporter activity	1/30	50/18737	0.02	12.4913	3.25824	0.077091	0.166572	0.11013	SLC25A23	1
GO:1901505	carbohydrate derivative transmembrane transporter activity	1/30	53/18737	0.0188679	11.7843	3.14841	0.0815291	0.17307	0.114427	SLC25A23	1
GO:0015485	cholesterol binding	1/30	54/18737	0.0185185	11.566	3.11375	0.0830038	0.173163	0.114488	OSBPL10	1
GO:0001786	phosphatidylserine binding	1/30	56/18737	0.0178571	11.153	3.04708	0.0859464	0.173568	0.114755	OSBPL10	1
GO:0015932	nucleobase-containing compound transmembrane transporter activity	1/30	57/18737	0.0175439	10.9573	3.015	0.0874143	0.173568	0.114755	SLC25A23	1
GO:0004879	nuclear receptor activity	1/30	59/18737	0.0169492	10.5859	2.95318	0.0903433	0.173568	0.114755	NR2F2	1
GO:0016504	peptidase activator activity	1/30	59/18737	0.0169492	10.5859	2.95318	0.0903433	0.173568	0.114755	SFRP2	1
GO:0004714	transmembrane receptor protein tyrosine kinase activity	1/30	60/18737	0.0166667	10.4094	2.92336	0.0918043	0.173568	0.114755	NTRK3	1
GO:0098531	ligand-activated transcription factor activity	1/30	60/18737	0.0166667	10.4094	2.92336	0.0918043	0.173568	0.114755	NR2F2	1
GO:0015026	coreceptor activity	1/30	61/18737	0.0163934	10.2388	2.89425	0.0932631	0.173613	0.114785	LRP5	1
GO:0008235	metalloexopeptidase activity	1/30	67/18737	0.0149254	9.32189	2.73265	0.101968	0.183871	0.121568	CPA3	1
GO:0005548	phospholipid transporter activity	1/30	68/18737	0.0147059	9.1848	2.70769	0.103411	0.183871	0.121568	OSBPL10	1
GO:0032934	sterol binding	1/30	68/18737	0.0147059	9.1848	2.70769	0.103411	0.183871	0.121568	OSBPL10	1
GO:0002039	p53 binding	1/30	69/18737	0.0144928	9.05169	2.68324	0.104852	0.183871	0.121568	NTRK3	1
GO:0019199	transmembrane receptor protein kinase activity	1/30	79/18737	0.0126582	7.90591	2.46319	0.119137	0.203037	0.134239	NTRK3	1
GO:0035064	methylated histone binding	1/30	79/18737	0.0126582	7.90591	2.46319	0.119137	0.203037	0.134239	TDRD3	1
GO:0140034	methylation-dependent protein binding	1/30	81/18737	0.0123457	7.7107	2.42381	0.121968	0.204974	0.13552	TDRD3	1
GO:0008081	phosphoric diester hydrolase activity	1/30	87/18737	0.0114943	7.17893	2.31329	0.130406	0.213486	0.141148	GDPD3	1
GO:0072341	modified amino acid binding	1/30	88/18737	0.0113636	7.09735	2.29589	0.131805	0.213486	0.141148	OSBPL10	1
GO:0140098	catalytic activity, acting on RNA	2/30	397/18737	0.00503778	3.14643	1.73105	0.132326	0.213486	0.141148	NYNRIN/NUDT12	2
GO:0043178	alcohol binding	1/30	91/18737	0.010989	6.86337	2.24529	0.135989	0.215881	0.142731	OSBPL10	1
GO:0004553	hydrolase activity, hydrolyzing O-glycosyl compounds	1/30	92/18737	0.0108696	6.78877	2.22893	0.137379	0.215881	0.142731	MAN1C1	1
GO:0008238	exopeptidase activity	1/30	103/18737	0.00970874	6.06375	2.06365	0.152528	0.235709	0.155841	CPA3	1
GO:0004620	phospholipase activity	1/30	104/18737	0.00961538	6.00545	2.04982	0.153893	0.235709	0.155841	GDPD3	1
GO:0005496	steroid binding	1/30	108/18737	0.00925926	5.78302	1.99626	0.159329	0.240985	0.159329	OSBPL10	1
GO:0004222	metalloendopeptidase activity	1/30	110/18737	0.00909091	5.67788	1.97047	0.162035	0.242052	0.160034	PAPPA	1
GO:0005200	structural constituent of cytoskeleton	1/30	113/18737	0.00884956	5.52714	1.93296	0.166077	0.245065	0.162026	ACTG1	1
GO:0016298	lipase activity	1/30	129/18737	0.00775194	4.8416	1.75329	0.187321	0.272243	0.179995	GDPD3	1
GO:0016798	hydrolase activity, acting on glycosyl bonds	1/30	131/18737	0.00763359	4.76768	1.73293	0.189939	0.272243	0.179995	MAN1C1	1
GO:0019838	growth factor binding	1/30	132/18737	0.00757576	4.73157	1.7229	0.191245	0.272243	0.179995	NTRK3	1
GO:0015297	antiporter activity	1/30	136/18737	0.00735294	4.5924	1.68377	0.196449	0.2764	0.182744	SLC25A23	1
GO:0004713	protein tyrosine kinase activity	1/30	138/18737	0.00724638	4.52585	1.66477	0.199039	0.276825	0.183025	NTRK3	1
GO:0008194	UDP-glycosyltransferase activity	1/30	145/18737	0.00689655	4.30736	1.60103	0.208041	0.286056	0.189128	CHPF	1
GO:0019842	vitamin binding	1/30	150/18737	0.00666667	4.16378	1.55792	0.21441	0.291502	0.192728	PC	1
GO:0005178	integrin binding	1/30	161/18737	0.00621118	3.8793	1.46933	0.22825	0.303399	0.200595	SFRP2	1
GO:0008083	growth factor activity	1/30	162/18737	0.00617284	3.85535	1.46167	0.229496	0.303399	0.200595	MDK	1
GO:0005201	extracellular matrix structural constituent	1/30	166/18737	0.0060241	3.76245	1.43162	0.234462	0.303399	0.200595	THBS2	1
GO:0015103	inorganic anion transmembrane transporter activity	1/30	166/18737	0.0060241	3.76245	1.43162	0.234462	0.303399	0.200595	SLC25A23	1
GO:0016874	ligase activity	1/30	167/18737	0.00598802	3.73992	1.42425	0.235699	0.303399	0.200595	PC	1
GO:0005319	lipid transporter activity	1/30	178/18737	0.00561798	3.5088	1.34678	0.249175	0.31737	0.209832	OSBPL10	1
GO:0140030	modification-dependent protein binding	1/30	188/18737	0.00531915	3.32216	1.28147	0.261227	0.327351	0.21643	TDRD3	1
GO:0061135	endopeptidase regulator activity	1/30	189/18737	0.00529101	3.30459	1.27518	0.262422	0.327351	0.21643	SFRP2	1
GO:0052689	carboxylic ester hydrolase activity	1/30	195/18737	0.00512821	3.20291	1.23832	0.269552	0.332339	0.219728	GDPD3	1
GO:0016758	hexosyltransferase activity	1/30	197/18737	0.00507614	3.17039	1.22635	0.271914	0.332339	0.219728	CHPF	1
GO:0000287	magnesium ion binding	1/30	231/18737	0.004329	2.70375	1.04341	0.310953	0.376253	0.248762	NUDT12	1
GO:0061134	peptidase regulator activity	1/30	235/18737	0.00425532	2.65773	1.02408	0.31541	0.377868	0.24983	SFRP2	1
GO:0033218	amide binding	1/30	244/18737	0.00409836	2.5597	0.98204	0.325338	0.38594	0.255167	PC	1
GO:0042393	histone binding	1/30	249/18737	0.00401606	2.5083	0.959488	0.330793	0.388602	0.256927	TDRD3	1
GO:0016757	glycosyltransferase activity	1/30	267/18737	0.00374532	2.3392	0.882602	0.350081	0.404643	0.267533	CHPF	1
GO:0008514	organic anion transmembrane transporter activity	1/30	268/18737	0.00373134	2.33047	0.878514	0.351137	0.404643	0.267533	SLC25A23	1
GO:0003713	transcription coactivator activity	1/30	285/18737	0.00350877	2.19146	0.811667	0.368831	0.420565	0.278059	TDRD3	1
GO:0015291	secondary active transmembrane transporter activity	1/30	288/18737	0.00347222	2.16863	0.80036	0.371905	0.420565	0.278059	SLC25A23	1
GO:0031625	ubiquitin protein ligase binding	1/30	301/18737	0.00332226	2.07497	0.752912	0.385058	0.431407	0.285228	ACTG1	1
GO:0044389	ubiquitin-like protein ligase binding	1/30	321/18737	0.00311526	1.94569	0.684386	0.404774	0.449337	0.297082	ACTG1	1
GO:0003924	GTPase activity	1/30	333/18737	0.003003	1.87558	0.64559	0.41631	0.457941	0.302771	ARL6	1
GO:0061630	ubiquitin protein ligase activity	1/30	355/18737	0.0028169	1.75934	0.578432	0.436899	0.476259	0.314882	UBE2D2	1
GO:0042578	phosphoric ester hydrolase activity	1/30	363/18737	0.00275482	1.72057	0.555168	0.444211	0.479906	0.317293	GDPD3	1
GO:0061659	ubiquitin-like protein ligase activity	1/30	374/18737	0.0026738	1.66996	0.524098	0.454114	0.486264	0.321497	UBE2D2	1
GO:0005525	GTP binding	1/30	380/18737	0.00263158	1.6436	0.507577	0.459444	0.487656	0.322417	ARL6	1
GO:0019001	guanyl nucleotide binding	1/30	402/18737	0.00248756	1.55365	0.44937	0.47856	0.496684	0.328386	ARL6	1
GO:0032561	guanyl ribonucleotide binding	1/30	402/18737	0.00248756	1.55365	0.44937	0.47856	0.496684	0.328386	ARL6	1
GO:0004175	endopeptidase activity	1/30	404/18737	0.00247525	1.54596	0.444252	0.480265	0.496684	0.328386	PAPPA	1
GO:0004842	ubiquitin-protein transferase activity	1/30	452/18737	0.00221239	1.38178	0.329031	0.519606	0.532816	0.352275	UBE2D2	1
GO:0022804	active transmembrane transporter activity	1/30	458/18737	0.00218341	1.36368	0.315556	0.524316	0.533128	0.352481	SLC25A23	1
GO:0019787	ubiquitin-like protein transferase activity	1/30	482/18737	0.00207469	1.29578	0.263451	0.542715	0.547238	0.36181	UBE2D2	1
GO:0016755	aminoacyltransferase activity	1/30	499/18737	0.00200401	1.25164	0.228156	0.555329	0.555329	0.36716	UBE2D2	1
