# Supplementary material
Source: Research Square preprint supplement (doi:10.21203/rs.3.rs-9392286/v1)
Supplement: Supplementary file 18 [file c7ad87256eba39701dd82f18.xlsx]

## Sheet: Table S15(B_DEG)
Table S15: The Differential Genes of B cells in the Training Set
gene	diff_IPF_minus_control	AveExpr	t	pvalue	fdr	B
FTL	-1.11982	4.65439652631316e-16	-1.89946	0.0575363655209656	0.691627006807485	-4.55885
SCGB1A1	1.05226931755635	3.41607084500048e-17	1.78487006578533	0.0743159494970611	0.691627006807485	-4.56475
condition	1	0.384615384615385	1.69621031042725	0.0898805230245345	0.691627006807485	-4.56907
TMSB4X	-0.92934	1.20416497286267e-15	-1.57636	0.114978676271414	0.691627006807485	-4.57456
HSPA5	0.879438754038291	5.46571335200077e-16	1.49171308198904	0.135809306610212	0.691627006807485	-4.57819
FTH1	-0.809544	-1.70804e-17	-1.37316	0.169737548158868	0.691627006807485	-4.58294
B2M	-0.801534	-4.6971e-16	-1.35957	0.174000100193521	0.691627006807485	-4.58346
RHOH	0.753815667577726	0	1.27862990750694	0.20106026992308	0.691627006807485	-4.58644
CTSH	0.733387162703452	3.92848147175055e-16	1.24397886691258	0.213539627608183	0.691627006807485	-4.58766
MT.ND4	0.729147776200852	-7.85696e-16	1.23678797581699	0.216197968107066	0.691627006807485	-4.58791
MARK3	0.647144522531728	1.36642833800019e-16	1.09769321145484	0.272367740848646	0.691627006807485	-4.59245
MYL6	0.639360041783687	-1.60128e-16	1.08448909494869	0.278176949508114	0.691627006807485	-4.59286
RBM6	0.573452588161471	-3.33067e-16	0.97269619258068	0.330730369580041	0.691627006807485	-4.59607
FOXP1	0.573452588161471	-3.33067e-16	0.97269619258068	0.330730369580041	0.691627006807485	-4.59607
2025-03-06	0.573452588161471	-3.33067e-16	0.97269619258068	0.330730369580041	0.691627006807485	-4.59607
BIRC3	0.573452588161471	-3.33067e-16	0.97269619258068	0.330730369580041	0.691627006807485	-4.59607
UTRN	0.531767150890725	-1.70804e-16	0.901988924087371	0.367086806375576	0.691627006807485	-4.59793
ADAM28	0.531767150890725	-1.70804e-16	0.901988924087371	0.367086806375576	0.691627006807485	-4.59793
MYH9	0.531767150890725	-1.70804e-16	0.901988924087371	0.367086806375576	0.691627006807485	-4.59793
MT.ND3	0.523819764472233	4.2700885562506e-18	0.888508485303375	0.374290957513127	0.691627006807485	-4.59826
MT.CYB	0.515208578446438	-6.49053e-16	0.873902102781415	0.382194806766347	0.691627006807485	-4.59862
MT.ATP6	0.464108500818319	-5.29491e-16	0.787225624244966	0.431170458266705	0.691627006807485	-4.60064
TMSB10	0.430528895835904	-3.07446e-16	0.730267552053721	0.465245600653205	0.691627006807485	-4.60185
MT.ND2	0.334599694473654	-1.00774e-15	0.567551451632019	0.570353688415848	0.691627006807485	-4.6048
MT.ND1	0.31381191589366	-5.12411e-17	0.532291007273756	0.594537554451103	0.691627006807485	-4.60534
EIF4A2	-0.282239	4.52629386962564e-16	-0.478736	0.632137695897128	0.691627006807485	-4.6061
SCAF11	-0.282239	4.52629386962564e-16	-0.478736	0.632137695897128	0.691627006807485	-4.6061
CD52	0.249775118252355	3.41607084500048e-17	0.423671130867831	0.671815761922001	0.691627006807485	-4.60679
CCNL2	0.248062231319798	9.39419482375133e-16	0.420765714392231	0.673936182029218	0.691627006807485	-4.60683
GNB1	0.248062231319798	9.39419482375133e-16	0.420765714392231	0.673936182029218	0.691627006807485	-4.60683
RERE	0.248062231319798	9.39419482375133e-16	0.420765714392231	0.673936182029218	0.691627006807485	-4.60683
VPS13D	0.248062231319798	9.39419482375133e-16	0.420765714392231	0.673936182029218	0.691627006807485	-4.60683
PRDM2	0.248062231319798	9.39419482375133e-16	0.420765714392231	0.673936182029218	0.691627006807485	-4.60683
UBR4	0.248062231319798	9.39419482375133e-16	0.420765714392231	0.673936182029218	0.691627006807485	-4.60683
CAPZB	0.248062231319798	9.39419482375133e-16	0.420765714392231	0.673936182029218	0.691627006807485	-4.60683
HP1BP3	0.248062231319798	9.39419482375133e-16	0.420765714392231	0.673936182029218	0.691627006807485	-4.60683
EIF4G3	0.248062231319798	9.39419482375133e-16	0.420765714392231	0.673936182029218	0.691627006807485	-4.60683
USP48	0.248062231319798	9.39419482375133e-16	0.420765714392231	0.673936182029218	0.691627006807485	-4.60683
CLIC4	0.248062231319798	9.39419482375133e-16	0.420765714392231	0.673936182029218	0.691627006807485	-4.60683
RSRP1	0.248062231319798	9.39419482375133e-16	0.420765714392231	0.673936182029218	0.691627006807485	-4.60683
SYTL1	0.248062231319798	9.39419482375133e-16	0.420765714392231	0.673936182029218	0.691627006807485	-4.60683
WASF2	0.248062231319798	9.39419482375133e-16	0.420765714392231	0.673936182029218	0.691627006807485	-4.60683
THEMIS2	0.248062231319798	9.39419482375133e-16	0.420765714392231	0.673936182029218	0.691627006807485	-4.60683
EPB41	0.248062231319798	9.39419482375133e-16	0.420765714392231	0.673936182029218	0.691627006807485	-4.60683
SRSF4	0.248062231319798	9.39419482375133e-16	0.420765714392231	0.673936182029218	0.691627006807485	-4.60683
LAPTM5	0.248062231319798	9.39419482375133e-16	0.420765714392231	0.673936182029218	0.691627006807485	-4.60683
PUM1	0.248062231319798	9.39419482375133e-16	0.420765714392231	0.673936182029218	0.691627006807485	-4.60683
SFPQ	0.248062231319798	9.39419482375133e-16	0.420765714392231	0.673936182029218	0.691627006807485	-4.60683
KIAA0319L	0.248062231319798	9.39419482375133e-16	0.420765714392231	0.673936182029218	0.691627006807485	-4.60683
AGO3	0.248062231319798	9.39419482375133e-16	0.420765714392231	0.673936182029218	0.691627006807485	-4.60683
SMAP2	0.248062231319798	9.39419482375133e-16	0.420765714392231	0.673936182029218	0.691627006807485	-4.60683
FAF1	0.248062231319798	9.39419482375133e-16	0.420765714392231	0.673936182029218	0.691627006807485	-4.60683
EPS15	0.248062231319798	9.39419482375133e-16	0.420765714392231	0.673936182029218	0.691627006807485	-4.60683
OSBPL9	0.248062231319798	9.39419482375133e-16	0.420765714392231	0.673936182029218	0.691627006807485	-4.60683
NRDC	0.248062231319798	9.39419482375133e-16	0.420765714392231	0.673936182029218	0.691627006807485	-4.60683
USP24	0.248062231319798	9.39419482375133e-16	0.420765714392231	0.673936182029218	0.691627006807485	-4.60683
JUN	0.248062231319798	9.39419482375133e-16	0.420765714392231	0.673936182029218	0.691627006807485	-4.60683
JAK1	0.248062231319798	9.39419482375133e-16	0.420765714392231	0.673936182029218	0.691627006807485	-4.60683
PDE4B	0.248062231319798	9.39419482375133e-16	0.420765714392231	0.673936182029218	0.691627006807485	-4.60683
SRSF11	0.248062231319798	9.39419482375133e-16	0.420765714392231	0.673936182029218	0.691627006807485	-4.60683
ZRANB2	0.248062231319798	9.39419482375133e-16	0.420765714392231	0.673936182029218	0.691627006807485	-4.60683
FUBP1	0.248062231319798	9.39419482375133e-16	0.420765714392231	0.673936182029218	0.691627006807485	-4.60683
PKN2	0.248062231319798	9.39419482375133e-16	0.420765714392231	0.673936182029218	0.691627006807485	-4.60683
ZNF644	0.248062231319798	9.39419482375133e-16	0.420765714392231	0.673936182029218	0.691627006807485	-4.60683
RPAP2	0.248062231319798	9.39419482375133e-16	0.420765714392231	0.673936182029218	0.691627006807485	-4.60683
CD53	0.248062231319798	9.39419482375133e-16	0.420765714392231	0.673936182029218	0.691627006807485	-4.60683
RAP1A	0.248062231319798	9.39419482375133e-16	0.420765714392231	0.673936182029218	0.691627006807485	-4.60683
CSDE1	0.248062231319798	9.39419482375133e-16	0.420765714392231	0.673936182029218	0.691627006807485	-4.60683
MAN1A2	0.248062231319798	9.39419482375133e-16	0.420765714392231	0.673936182029218	0.691627006807485	-4.60683
TXNIP	0.248062231319798	9.39419482375133e-16	0.420765714392231	0.673936182029218	0.691627006807485	-4.60683
MCL1	0.248062231319798	9.39419482375133e-16	0.420765714392231	0.673936182029218	0.691627006807485	-4.60683
CTSS	0.248062231319798	9.39419482375133e-16	0.420765714392231	0.673936182029218	0.691627006807485	-4.60683
POGZ	0.248062231319798	9.39419482375133e-16	0.420765714392231	0.673936182029218	0.691627006807485	-4.60683
GATAD2B	0.248062231319798	9.39419482375133e-16	0.420765714392231	0.673936182029218	0.691627006807485	-4.60683
ADAR	0.248062231319798	9.39419482375133e-16	0.420765714392231	0.673936182029218	0.691627006807485	-4.60683
ASH1L	0.248062231319798	9.39419482375133e-16	0.420765714392231	0.673936182029218	0.691627006807485	-4.60683
FCRL5	0.248062231319798	9.39419482375133e-16	0.420765714392231	0.673936182029218	0.691627006807485	-4.60683
FCRL1	0.248062231319798	9.39419482375133e-16	0.420765714392231	0.673936182029218	0.691627006807485	-4.60683
IFI16	0.248062231319798	9.39419482375133e-16	0.420765714392231	0.673936182029218	0.691627006807485	-4.60683
DCAF8	0.248062231319798	9.39419482375133e-16	0.420765714392231	0.673936182029218	0.691627006807485	-4.60683
COPA	0.248062231319798	9.39419482375133e-16	0.420765714392231	0.673936182029218	0.691627006807485	-4.60683
SLAMF7	0.248062231319798	9.39419482375133e-16	0.420765714392231	0.673936182029218	0.691627006807485	-4.60683
LY9	0.248062231319798	9.39419482375133e-16	0.420765714392231	0.673936182029218	0.691627006807485	-4.60683
ATF6	0.248062231319798	9.39419482375133e-16	0.420765714392231	0.673936182029218	0.691627006807485	-4.60683
RCSD1	0.248062231319798	9.39419482375133e-16	0.420765714392231	0.673936182029218	0.691627006807485	-4.60683
PRRC2C	0.248062231319798	9.39419482375133e-16	0.420765714392231	0.673936182029218	0.691627006807485	-4.60683
RABGAP1L	0.248062231319798	9.39419482375133e-16	0.420765714392231	0.673936182029218	0.691627006807485	-4.60683
TNR	0.248062231319798	9.39419482375133e-16	0.420765714392231	0.673936182029218	0.691627006807485	-4.60683
RALGPS2	0.248062231319798	9.39419482375133e-16	0.420765714392231	0.673936182029218	0.691627006807485	-4.60683
CEP350	0.248062231319798	9.39419482375133e-16	0.420765714392231	0.673936182029218	0.691627006807485	-4.60683
TPR	0.248062231319798	9.39419482375133e-16	0.420765714392231	0.673936182029218	0.691627006807485	-4.60683
DENND1B	0.248062231319798	9.39419482375133e-16	0.420765714392231	0.673936182029218	0.691627006807485	-4.60683
PTPRC	0.248062231319798	9.39419482375133e-16	0.420765714392231	0.673936182029218	0.691627006807485	-4.60683
BTG2	0.248062231319798	9.39419482375133e-16	0.420765714392231	0.673936182029218	0.691627006807485	-4.60683
MDM4	0.248062231319798	9.39419482375133e-16	0.420765714392231	0.673936182029218	0.691627006807485	-4.60683
MAPKAPK2	0.248062231319798	9.39419482375133e-16	0.420765714392231	0.673936182029218	0.691627006807485	-4.60683
CAPN2	0.248062231319798	9.39419482375133e-16	0.420765714392231	0.673936182029218	0.691627006807485	-4.60683
GALNT2	0.248062231319798	9.39419482375133e-16	0.420765714392231	0.673936182029218	0.691627006807485	-4.60683
ARID4B	0.248062231319798	9.39419482375133e-16	0.420765714392231	0.673936182029218	0.691627006807485	-4.60683
LYST	0.248062231319798	9.39419482375133e-16	0.420765714392231	0.673936182029218	0.691627006807485	-4.60683
HNRNPU	0.248062231319798	9.39419482375133e-16	0.420765714392231	0.673936182029218	0.691627006807485	-4.60683
SMYD3	0.248062231319798	9.39419482375133e-16	0.420765714392231	0.673936182029218	0.691627006807485	-4.60683
NBAS	0.248062231319798	9.39419482375133e-16	0.420765714392231	0.673936182029218	0.691627006807485	-4.60683
PUM2	0.248062231319798	9.39419482375133e-16	0.420765714392231	0.673936182029218	0.691627006807485	-4.60683
ITSN2	0.248062231319798	9.39419482375133e-16	0.420765714392231	0.673936182029218	0.691627006807485	-4.60683
RAB10	0.248062231319798	9.39419482375133e-16	0.420765714392231	0.673936182029218	0.691627006807485	-4.60683
BIRC6	0.248062231319798	9.39419482375133e-16	0.420765714392231	0.673936182029218	0.691627006807485	-4.60683
SOS1	0.248062231319798	9.39419482375133e-16	0.420765714392231	0.673936182029218	0.691627006807485	-4.60683
EML4	0.248062231319798	9.39419482375133e-16	0.420765714392231	0.673936182029218	0.691627006807485	-4.60683
ZFP36L2	0.248062231319798	9.39419482375133e-16	0.420765714392231	0.673936182029218	0.691627006807485	-4.60683
CAMKMT	0.248062231319798	9.39419482375133e-16	0.420765714392231	0.673936182029218	0.691627006807485	-4.60683
TTC7A	0.248062231319798	9.39419482375133e-16	0.420765714392231	0.673936182029218	0.691627006807485	-4.60683
FBXO11	0.248062231319798	9.39419482375133e-16	0.420765714392231	0.673936182029218	0.691627006807485	-4.60683
ERLEC1	0.248062231319798	9.39419482375133e-16	0.420765714392231	0.673936182029218	0.691627006807485	-4.60683
PSME4	0.248062231319798	9.39419482375133e-16	0.420765714392231	0.673936182029218	0.691627006807485	-4.60683
ACYP2	0.248062231319798	9.39419482375133e-16	0.420765714392231	0.673936182029218	0.691627006807485	-4.60683
CCDC88A	0.248062231319798	9.39419482375133e-16	0.420765714392231	0.673936182029218	0.691627006807485	-4.60683
BCL11A	0.248062231319798	9.39419482375133e-16	0.420765714392231	0.673936182029218	0.691627006807485	-4.60683
USP34	0.248062231319798	9.39419482375133e-16	0.420765714392231	0.673936182029218	0.691627006807485	-4.60683
PELI1	0.248062231319798	9.39419482375133e-16	0.420765714392231	0.673936182029218	0.691627006807485	-4.60683
AFTPH	0.248062231319798	9.39419482375133e-16	0.420765714392231	0.673936182029218	0.691627006807485	-4.60683
ZNF638	0.248062231319798	9.39419482375133e-16	0.420765714392231	0.673936182029218	0.691627006807485	-4.60683
SFTPB	0.248062231319798	9.39419482375133e-16	0.420765714392231	0.673936182029218	0.691627006807485	-4.60683
EIF2AK3	0.248062231319798	9.39419482375133e-16	0.420765714392231	0.673936182029218	0.691627006807485	-4.60683
IGKC	0.248062231319798	9.39419482375133e-16	0.420765714392231	0.673936182029218	0.691627006807485	-4.60683
ANKRD36C	0.248062231319798	9.39419482375133e-16	0.420765714392231	0.673936182029218	0.691627006807485	-4.60683
ANKRD36	0.248062231319798	9.39419482375133e-16	0.420765714392231	0.673936182029218	0.691627006807485	-4.60683
ANKRD36B	0.248062231319798	9.39419482375133e-16	0.420765714392231	0.673936182029218	0.691627006807485	-4.60683
TMEM131	0.248062231319798	9.39419482375133e-16	0.420765714392231	0.673936182029218	0.691627006807485	-4.60683
INPP4A	0.248062231319798	9.39419482375133e-16	0.420765714392231	0.673936182029218	0.691627006807485	-4.60683
RNF149	0.248062231319798	9.39419482375133e-16	0.420765714392231	0.673936182029218	0.691627006807485	-4.60683
MAP4K4	0.248062231319798	9.39419482375133e-16	0.420765714392231	0.673936182029218	0.691627006807485	-4.60683
GCC2	0.248062231319798	9.39419482375133e-16	0.420765714392231	0.673936182029218	0.691627006807485	-4.60683
BCL2L11	0.248062231319798	9.39419482375133e-16	0.420765714392231	0.673936182029218	0.691627006807485	-4.60683
ACTR3	0.248062231319798	9.39419482375133e-16	0.420765714392231	0.673936182029218	0.691627006807485	-4.60683
CLASP1	0.248062231319798	9.39419482375133e-16	0.420765714392231	0.673936182029218	0.691627006807485	-4.60683
MAP3K2	0.248062231319798	9.39419482375133e-16	0.420765714392231	0.673936182029218	0.691627006807485	-4.60683
WDR33	0.248062231319798	9.39419482375133e-16	0.420765714392231	0.673936182029218	0.691627006807485	-4.60683
MGAT5	0.248062231319798	9.39419482375133e-16	0.420765714392231	0.673936182029218	0.691627006807485	-4.60683
RAB3GAP1	0.248062231319798	9.39419482375133e-16	0.420765714392231	0.673936182029218	0.691627006807485	-4.60683
UBXN4	0.248062231319798	9.39419482375133e-16	0.420765714392231	0.673936182029218	0.691627006807485	-4.60683
CXCR4	0.248062231319798	9.39419482375133e-16	0.420765714392231	0.673936182029218	0.691627006807485	-4.60683
ARHGAP15	0.248062231319798	9.39419482375133e-16	0.420765714392231	0.673936182029218	0.691627006807485	-4.60683
MBD5	0.248062231319798	9.39419482375133e-16	0.420765714392231	0.673936182029218	0.691627006807485	-4.60683
CYTIP	0.248062231319798	9.39419482375133e-16	0.420765714392231	0.673936182029218	0.691627006807485	-4.60683
BAZ2B	0.248062231319798	9.39419482375133e-16	0.420765714392231	0.673936182029218	0.691627006807485	-4.60683
2025-03-07	0.248062231319798	9.39419482375133e-16	0.420765714392231	0.673936182029218	0.691627006807485	-4.60683
TANK	0.248062231319798	9.39419482375133e-16	0.420765714392231	0.673936182029218	0.691627006807485	-4.60683
COBLL1	0.248062231319798	9.39419482375133e-16	0.420765714392231	0.673936182029218	0.691627006807485	-4.60683
UBR3	0.248062231319798	9.39419482375133e-16	0.420765714392231	0.673936182029218	0.691627006807485	-4.60683
TLK1	0.248062231319798	9.39419482375133e-16	0.420765714392231	0.673936182029218	0.691627006807485	-4.60683
ITGA6	0.248062231319798	9.39419482375133e-16	0.420765714392231	0.673936182029218	0.691627006807485	-4.60683
PDK1	0.248062231319798	9.39419482375133e-16	0.420765714392231	0.673936182029218	0.691627006807485	-4.60683
SP3	0.248062231319798	9.39419482375133e-16	0.420765714392231	0.673936182029218	0.691627006807485	-4.60683
WIPF1	0.248062231319798	9.39419482375133e-16	0.420765714392231	0.673936182029218	0.691627006807485	-4.60683
HNRNPA3	0.248062231319798	9.39419482375133e-16	0.420765714392231	0.673936182029218	0.691627006807485	-4.60683
ITGA4	0.248062231319798	9.39419482375133e-16	0.420765714392231	0.673936182029218	0.691627006807485	-4.60683
GLS	0.248062231319798	9.39419482375133e-16	0.420765714392231	0.673936182029218	0.691627006807485	-4.60683
STK17B	0.248062231319798	9.39419482375133e-16	0.420765714392231	0.673936182029218	0.691627006807485	-4.60683
ANKRD44	0.248062231319798	9.39419482375133e-16	0.420765714392231	0.673936182029218	0.691627006807485	-4.60683
CLK1	0.248062231319798	9.39419482375133e-16	0.420765714392231	0.673936182029218	0.691627006807485	-4.60683
CFLAR	0.248062231319798	9.39419482375133e-16	0.420765714392231	0.673936182029218	0.691627006807485	-4.60683
CASP10	0.248062231319798	9.39419482375133e-16	0.420765714392231	0.673936182029218	0.691627006807485	-4.60683
ARPC2	0.248062231319798	9.39419482375133e-16	0.420765714392231	0.673936182029218	0.691627006807485	-4.60683
CUL3	0.248062231319798	9.39419482375133e-16	0.420765714392231	0.673936182029218	0.691627006807485	-4.60683
DOCK10	0.248062231319798	9.39419482375133e-16	0.420765714392231	0.673936182029218	0.691627006807485	-4.60683
RHBDD1	0.248062231319798	9.39419482375133e-16	0.420765714392231	0.673936182029218	0.691627006807485	-4.60683
TRIP12	0.248062231319798	9.39419482375133e-16	0.420765714392231	0.673936182029218	0.691627006807485	-4.60683
SP110	0.248062231319798	9.39419482375133e-16	0.420765714392231	0.673936182029218	0.691627006807485	-4.60683
SP140	0.248062231319798	9.39419482375133e-16	0.420765714392231	0.673936182029218	0.691627006807485	-4.60683
SP140L	0.248062231319798	9.39419482375133e-16	0.420765714392231	0.673936182029218	0.691627006807485	-4.60683
SP100	0.248062231319798	9.39419482375133e-16	0.420765714392231	0.673936182029218	0.691627006807485	-4.60683
CAB39	0.248062231319798	9.39419482375133e-16	0.420765714392231	0.673936182029218	0.691627006807485	-4.60683
GIGYF2	0.248062231319798	9.39419482375133e-16	0.420765714392231	0.673936182029218	0.691627006807485	-4.60683
INPP5D	0.248062231319798	9.39419482375133e-16	0.420765714392231	0.673936182029218	0.691627006807485	-4.60683
DGKD	0.248062231319798	9.39419482375133e-16	0.420765714392231	0.673936182029218	0.691627006807485	-4.60683
LRRFIP1	0.248062231319798	9.39419482375133e-16	0.420765714392231	0.673936182029218	0.691627006807485	-4.60683
HDLBP	0.248062231319798	9.39419482375133e-16	0.420765714392231	0.673936182029218	0.691627006807485	-4.60683
ITPR1	0.248062231319798	9.39419482375133e-16	0.420765714392231	0.673936182029218	0.691627006807485	-4.60683
EDEM1	0.248062231319798	9.39419482375133e-16	0.420765714392231	0.673936182029218	0.691627006807485	-4.60683
SETD5	0.248062231319798	9.39419482375133e-16	0.420765714392231	0.673936182029218	0.691627006807485	-4.60683
IQSEC1	0.248062231319798	9.39419482375133e-16	0.420765714392231	0.673936182029218	0.691627006807485	-4.60683
NUP210	0.248062231319798	9.39419482375133e-16	0.420765714392231	0.673936182029218	0.691627006807485	-4.60683
CAPN7	0.248062231319798	9.39419482375133e-16	0.420765714392231	0.673936182029218	0.691627006807485	-4.60683
ANKRD28	0.248062231319798	9.39419482375133e-16	0.420765714392231	0.673936182029218	0.691627006807485	-4.60683
TBC1D5	0.248062231319798	9.39419482375133e-16	0.420765714392231	0.673936182029218	0.691627006807485	-4.60683
UBE2E2	0.248062231319798	9.39419482375133e-16	0.420765714392231	0.673936182029218	0.691627006807485	-4.60683
NGLY1	0.248062231319798	9.39419482375133e-16	0.420765714392231	0.673936182029218	0.691627006807485	-4.60683
TGFBR2	0.248062231319798	9.39419482375133e-16	0.420765714392231	0.673936182029218	0.691627006807485	-4.60683
STT3B	0.248062231319798	9.39419482375133e-16	0.420765714392231	0.673936182029218	0.691627006807485	-4.60683
OSBPL10	0.248062231319798	9.39419482375133e-16	0.420765714392231	0.673936182029218	0.691627006807485	-4.60683
CLASP2	0.248062231319798	9.39419482375133e-16	0.420765714392231	0.673936182029218	0.691627006807485	-4.60683
TRAK1	0.248062231319798	9.39419482375133e-16	0.420765714392231	0.673936182029218	0.691627006807485	-4.60683
NKTR	0.248062231319798	9.39419482375133e-16	0.420765714392231	0.673936182029218	0.691627006807485	-4.60683
LIMD1	0.248062231319798	9.39419482375133e-16	0.420765714392231	0.673936182029218	0.691627006807485	-4.60683
SMARCC1	0.248062231319798	9.39419482375133e-16	0.420765714392231	0.673936182029218	0.691627006807485	-4.60683
MAP4	0.248062231319798	9.39419482375133e-16	0.420765714392231	0.673936182029218	0.691627006807485	-4.60683
RBM5	0.248062231319798	9.39419482375133e-16	0.420765714392231	0.673936182029218	0.691627006807485	-4.60683
PBRM1	0.248062231319798	9.39419482375133e-16	0.420765714392231	0.673936182029218	0.691627006807485	-4.60683
GNL3	0.248062231319798	9.39419482375133e-16	0.420765714392231	0.673936182029218	0.691627006807485	-4.60683
FHIT	0.248062231319798	9.39419482375133e-16	0.420765714392231	0.673936182029218	0.691627006807485	-4.60683
SUCLG2	0.248062231319798	9.39419482375133e-16	0.420765714392231	0.673936182029218	0.691627006807485	-4.60683
ALCAM	0.248062231319798	9.39419482375133e-16	0.420765714392231	0.673936182029218	0.691627006807485	-4.60683
BBX	0.248062231319798	9.39419482375133e-16	0.420765714392231	0.673936182029218	0.691627006807485	-4.60683
CD47	0.248062231319798	9.39419482375133e-16	0.420765714392231	0.673936182029218	0.691627006807485	-4.60683
ZBTB20	0.248062231319798	9.39419482375133e-16	0.420765714392231	0.673936182029218	0.691627006807485	-4.60683
HCLS1	0.248062231319798	9.39419482375133e-16	0.420765714392231	0.673936182029218	0.691627006807485	-4.60683
GOLGB1	0.248062231319798	9.39419482375133e-16	0.420765714392231	0.673936182029218	0.691627006807485	-4.60683
EAF2	0.248062231319798	9.39419482375133e-16	0.420765714392231	0.673936182029218	0.691627006807485	-4.60683
PARP14	0.248062231319798	9.39419482375133e-16	0.420765714392231	0.673936182029218	0.691627006807485	-4.60683
SEC61A1	0.248062231319798	9.39419482375133e-16	0.420765714392231	0.673936182029218	0.691627006807485	-4.60683
H1FX	0.248062231319798	9.39419482375133e-16	0.420765714392231	0.673936182029218	0.691627006807485	-4.60683
MSL2	0.248062231319798	9.39419482375133e-16	0.420765714392231	0.673936182029218	0.691627006807485	-4.60683
STAG1	0.248062231319798	9.39419482375133e-16	0.420765714392231	0.673936182029218	0.691627006807485	-4.60683
ZBTB38	0.248062231319798	9.39419482375133e-16	0.420765714392231	0.673936182029218	0.691627006807485	-4.60683
RASA2	0.248062231319798	9.39419482375133e-16	0.420765714392231	0.673936182029218	0.691627006807485	-4.60683
XRN1	0.248062231319798	9.39419482375133e-16	0.420765714392231	0.673936182029218	0.691627006807485	-4.60683
U2SURP	0.248062231319798	9.39419482375133e-16	0.420765714392231	0.673936182029218	0.691627006807485	-4.60683
MBNL1	0.248062231319798	9.39419482375133e-16	0.420765714392231	0.673936182029218	0.691627006807485	-4.60683
SSR3	0.248062231319798	9.39419482375133e-16	0.420765714392231	0.673936182029218	0.691627006807485	-4.60683
CCNL1	0.248062231319798	9.39419482375133e-16	0.420765714392231	0.673936182029218	0.691627006807485	-4.60683
RSRC1	0.248062231319798	9.39419482375133e-16	0.420765714392231	0.673936182029218	0.691627006807485	-4.60683
SEC62	0.248062231319798	9.39419482375133e-16	0.420765714392231	0.673936182029218	0.691627006807485	-4.60683
PHC3	0.248062231319798	9.39419482375133e-16	0.420765714392231	0.673936182029218	0.691627006807485	-4.60683
FNDC3B	0.248062231319798	9.39419482375133e-16	0.420765714392231	0.673936182029218	0.691627006807485	-4.60683
TBL1XR1	0.248062231319798	9.39419482375133e-16	0.420765714392231	0.673936182029218	0.691627006807485	-4.60683
ATP11B	0.248062231319798	9.39419482375133e-16	0.420765714392231	0.673936182029218	0.691627006807485	-4.60683
KLHL6	0.248062231319798	9.39419482375133e-16	0.420765714392231	0.673936182029218	0.691627006807485	-4.60683
TRA2B	0.248062231319798	9.39419482375133e-16	0.420765714392231	0.673936182029218	0.691627006807485	-4.60683
ST6GAL1	0.248062231319798	9.39419482375133e-16	0.420765714392231	0.673936182029218	0.691627006807485	-4.60683
LPP	0.248062231319798	9.39419482375133e-16	0.420765714392231	0.673936182029218	0.691627006807485	-4.60683
CCDC50	0.248062231319798	9.39419482375133e-16	0.420765714392231	0.673936182029218	0.691627006807485	-4.60683
ACAP2	0.248062231319798	9.39419482375133e-16	0.420765714392231	0.673936182029218	0.691627006807485	-4.60683
DLG1	0.248062231319798	9.39419482375133e-16	0.420765714392231	0.673936182029218	0.691627006807485	-4.60683
RUBCN	0.248062231319798	9.39419482375133e-16	0.420765714392231	0.673936182029218	0.691627006807485	-4.60683
ADD1	0.248062231319798	9.39419482375133e-16	0.420765714392231	0.673936182029218	0.691627006807485	-4.60683
HTT	0.248062231319798	9.39419482375133e-16	0.420765714392231	0.673936182029218	0.691627006807485	-4.60683
BOD1L1	0.248062231319798	9.39419482375133e-16	0.420765714392231	0.673936182029218	0.691627006807485	-4.60683
CD38	0.248062231319798	9.39419482375133e-16	0.420765714392231	0.673936182029218	0.691627006807485	-4.60683
LCORL	0.248062231319798	9.39419482375133e-16	0.420765714392231	0.673936182029218	0.691627006807485	-4.60683
SEL1L3	0.248062231319798	9.39419482375133e-16	0.420765714392231	0.673936182029218	0.691627006807485	-4.60683
TMEM156	0.248062231319798	9.39419482375133e-16	0.420765714392231	0.673936182029218	0.691627006807485	-4.60683
KLHL5	0.248062231319798	9.39419482375133e-16	0.420765714392231	0.673936182029218	0.691627006807485	-4.60683
UBE2K	0.248062231319798	9.39419482375133e-16	0.420765714392231	0.673936182029218	0.691627006807485	-4.60683
PDS5A	0.248062231319798	9.39419482375133e-16	0.420765714392231	0.673936182029218	0.691627006807485	-4.60683
FRYL	0.248062231319798	9.39419482375133e-16	0.420765714392231	0.673936182029218	0.691627006807485	-4.60683
SCFD2	0.248062231319798	9.39419482375133e-16	0.420765714392231	0.673936182029218	0.691627006807485	-4.60683
YTHDC1	0.248062231319798	9.39419482375133e-16	0.420765714392231	0.673936182029218	0.691627006807485	-4.60683
JCHAIN	0.248062231319798	9.39419482375133e-16	0.420765714392231	0.673936182029218	0.691627006807485	-4.60683
ANKRD17	0.248062231319798	9.39419482375133e-16	0.420765714392231	0.673936182029218	0.691627006807485	-4.60683
USO1	0.248062231319798	9.39419482375133e-16	0.420765714392231	0.673936182029218	0.691627006807485	-4.60683
HNRNPD	0.248062231319798	9.39419482375133e-16	0.420765714392231	0.673936182029218	0.691627006807485	-4.60683
HNRNPDL	0.248062231319798	9.39419482375133e-16	0.420765714392231	0.673936182029218	0.691627006807485	-4.60683
SEC31A	0.248062231319798	9.39419482375133e-16	0.420765714392231	0.673936182029218	0.691627006807485	-4.60683
ARHGAP24	0.248062231319798	9.39419482375133e-16	0.420765714392231	0.673936182029218	0.691627006807485	-4.60683
AFF1	0.248062231319798	9.39419482375133e-16	0.420765714392231	0.673936182029218	0.691627006807485	-4.60683
CCSER1	0.248062231319798	9.39419482375133e-16	0.420765714392231	0.673936182029218	0.691627006807485	-4.60683
DAPP1	0.248062231319798	9.39419482375133e-16	0.420765714392231	0.673936182029218	0.691627006807485	-4.60683
BANK1	0.248062231319798	9.39419482375133e-16	0.420765714392231	0.673936182029218	0.691627006807485	-4.60683
UBE2D3	0.248062231319798	9.39419482375133e-16	0.420765714392231	0.673936182029218	0.691627006807485	-4.60683
SEC24D	0.248062231319798	9.39419482375133e-16	0.420765714392231	0.673936182029218	0.691627006807485	-4.60683
KIAA1109	0.248062231319798	9.39419482375133e-16	0.420765714392231	0.673936182029218	0.691627006807485	-4.60683
TBC1D9	0.248062231319798	9.39419482375133e-16	0.420765714392231	0.673936182029218	0.691627006807485	-4.60683
GAB1	0.248062231319798	9.39419482375133e-16	0.420765714392231	0.673936182029218	0.691627006807485	-4.60683
LRBA	0.248062231319798	9.39419482375133e-16	0.420765714392231	0.673936182029218	0.691627006807485	-4.60683
FBXW7	0.248062231319798	9.39419482375133e-16	0.420765714392231	0.673936182029218	0.691627006807485	-4.60683
RAPGEF2	0.248062231319798	9.39419482375133e-16	0.420765714392231	0.673936182029218	0.691627006807485	-4.60683
2025-03-01	0.248062231319798	9.39419482375133e-16	0.420765714392231	0.673936182029218	0.691627006807485	-4.60683
SPCS3	0.248062231319798	9.39419482375133e-16	0.420765714392231	0.673936182029218	0.691627006807485	-4.60683
SNX25	0.248062231319798	9.39419482375133e-16	0.420765714392231	0.673936182029218	0.691627006807485	-4.60683
CLPTM1L	0.248062231319798	9.39419482375133e-16	0.420765714392231	0.673936182029218	0.691627006807485	-4.60683
DAP	0.248062231319798	9.39419482375133e-16	0.420765714392231	0.673936182029218	0.691627006807485	-4.60683
TRIO	0.248062231319798	9.39419482375133e-16	0.420765714392231	0.673936182029218	0.691627006807485	-4.60683
GOLPH3	0.248062231319798	9.39419482375133e-16	0.420765714392231	0.673936182029218	0.691627006807485	-4.60683
NIPBL	0.248062231319798	9.39419482375133e-16	0.420765714392231	0.673936182029218	0.691627006807485	-4.60683
WDR70	0.248062231319798	9.39419482375133e-16	0.420765714392231	0.673936182029218	0.691627006807485	-4.60683
RICTOR	0.248062231319798	9.39419482375133e-16	0.420765714392231	0.673936182029218	0.691627006807485	-4.60683
ARL15	0.248062231319798	9.39419482375133e-16	0.420765714392231	0.673936182029218	0.691627006807485	-4.60683
MAP3K1	0.248062231319798	9.39419482375133e-16	0.420765714392231	0.673936182029218	0.691627006807485	-4.60683
GPBP1	0.248062231319798	9.39419482375133e-16	0.420765714392231	0.673936182029218	0.691627006807485	-4.60683
PDE4D	0.248062231319798	9.39419482375133e-16	0.420765714392231	0.673936182029218	0.691627006807485	-4.60683
ZSWIM6	0.248062231319798	9.39419482375133e-16	0.420765714392231	0.673936182029218	0.691627006807485	-4.60683
AP3B1	0.248062231319798	9.39419482375133e-16	0.420765714392231	0.673936182029218	0.691627006807485	-4.60683
RASA1	0.248062231319798	9.39419482375133e-16	0.420765714392231	0.673936182029218	0.691627006807485	-4.60683
MEF2C	0.248062231319798	9.39419482375133e-16	0.420765714392231	0.673936182029218	0.691627006807485	-4.60683
TTC37	0.248062231319798	9.39419482375133e-16	0.420765714392231	0.673936182029218	0.691627006807485	-4.60683
ELL2	0.248062231319798	9.39419482375133e-16	0.420765714392231	0.673936182029218	0.691627006807485	-4.60683
CAST	0.248062231319798	9.39419482375133e-16	0.420765714392231	0.673936182029218	0.691627006807485	-4.60683
ST8SIA4	0.248062231319798	9.39419482375133e-16	0.420765714392231	0.673936182029218	0.691627006807485	-4.60683
FBXL17	0.248062231319798	9.39419482375133e-16	0.420765714392231	0.673936182029218	0.691627006807485	-4.60683
PJA2	0.248062231319798	9.39419482375133e-16	0.420765714392231	0.673936182029218	0.691627006807485	-4.60683
MAN2A1	0.248062231319798	9.39419482375133e-16	0.420765714392231	0.673936182029218	0.691627006807485	-4.60683
COMMD10	0.248062231319798	9.39419482375133e-16	0.420765714392231	0.673936182029218	0.691627006807485	-4.60683
DMXL1	0.248062231319798	9.39419482375133e-16	0.420765714392231	0.673936182029218	0.691627006807485	-4.60683
TNFAIP8	0.248062231319798	9.39419482375133e-16	0.420765714392231	0.673936182029218	0.691627006807485	-4.60683
CDC42SE2	0.248062231319798	9.39419482375133e-16	0.420765714392231	0.673936182029218	0.691627006807485	-4.60683
FNIP1	0.248062231319798	9.39419482375133e-16	0.420765714392231	0.673936182029218	0.691627006807485	-4.60683
AFF4	0.248062231319798	9.39419482375133e-16	0.420765714392231	0.673936182029218	0.691627006807485	-4.60683
SEC24A	0.248062231319798	9.39419482375133e-16	0.420765714392231	0.673936182029218	0.691627006807485	-4.60683
TXNDC15	0.248062231319798	9.39419482375133e-16	0.420765714392231	0.673936182029218	0.691627006807485	-4.60683
FAM13B	0.248062231319798	9.39419482375133e-16	0.420765714392231	0.673936182029218	0.691627006807485	-4.60683
SIL1	0.248062231319798	9.39419482375133e-16	0.420765714392231	0.673936182029218	0.691627006807485	-4.60683
MZB1	0.248062231319798	9.39419482375133e-16	0.420765714392231	0.673936182029218	0.691627006807485	-4.60683
ANKHD1	0.248062231319798	9.39419482375133e-16	0.420765714392231	0.673936182029218	0.691627006807485	-4.60683
NR3C1	0.248062231319798	9.39419482375133e-16	0.420765714392231	0.673936182029218	0.691627006807485	-4.60683
CSNK1A1	0.248062231319798	9.39419482375133e-16	0.420765714392231	0.673936182029218	0.691627006807485	-4.60683
CD74	0.248062231319798	9.39419482375133e-16	0.420765714392231	0.673936182029218	0.691627006807485	-4.60683
ANXA6	0.248062231319798	9.39419482375133e-16	0.420765714392231	0.673936182029218	0.691627006807485	-4.60683
ADAM19	0.248062231319798	9.39419482375133e-16	0.420765714392231	0.673936182029218	0.691627006807485	-4.60683
CLINT1	0.248062231319798	9.39419482375133e-16	0.420765714392231	0.673936182029218	0.691627006807485	-4.60683
DOCK2	0.248062231319798	9.39419482375133e-16	0.420765714392231	0.673936182029218	0.691627006807485	-4.60683
FBXW11	0.248062231319798	9.39419482375133e-16	0.420765714392231	0.673936182029218	0.691627006807485	-4.60683
DUSP1	0.248062231319798	9.39419482375133e-16	0.420765714392231	0.673936182029218	0.691627006807485	-4.60683
CPEB4	0.248062231319798	9.39419482375133e-16	0.420765714392231	0.673936182029218	0.691627006807485	-4.60683
NSD1	0.248062231319798	9.39419482375133e-16	0.420765714392231	0.673936182029218	0.691627006807485	-4.60683
SQSTM1	0.248062231319798	9.39419482375133e-16	0.420765714392231	0.673936182029218	0.691627006807485	-4.60683
DUSP22	0.248062231319798	9.39419482375133e-16	0.420765714392231	0.673936182029218	0.691627006807485	-4.60683
IRF4	0.248062231319798	9.39419482375133e-16	0.420765714392231	0.673936182029218	0.691627006807485	-4.60683
GMDS	0.248062231319798	9.39419482375133e-16	0.420765714392231	0.673936182029218	0.691627006807485	-4.60683
PRPF4B	0.248062231319798	9.39419482375133e-16	0.420765714392231	0.673936182029218	0.691627006807485	-4.60683
CDYL	0.248062231319798	9.39419482375133e-16	0.420765714392231	0.673936182029218	0.691627006807485	-4.60683
RREB1	0.248062231319798	9.39419482375133e-16	0.420765714392231	0.673936182029218	0.691627006807485	-4.60683
TXNDC5	0.248062231319798	9.39419482375133e-16	0.420765714392231	0.673936182029218	0.691627006807485	-4.60683
NEDD9	0.248062231319798	9.39419482375133e-16	0.420765714392231	0.673936182029218	0.691627006807485	-4.60683
JARID2	0.248062231319798	9.39419482375133e-16	0.420765714392231	0.673936182029218	0.691627006807485	-4.60683
ATXN1	0.248062231319798	9.39419482375133e-16	0.420765714392231	0.673936182029218	0.691627006807485	-4.60683
CDKAL1	0.248062231319798	9.39419482375133e-16	0.420765714392231	0.673936182029218	0.691627006807485	-4.60683
HIST1H1C	0.248062231319798	9.39419482375133e-16	0.420765714392231	0.673936182029218	0.691627006807485	-4.60683
HIST1H1E	0.248062231319798	9.39419482375133e-16	0.420765714392231	0.673936182029218	0.691627006807485	-4.60683
HIST1H1D	0.248062231319798	9.39419482375133e-16	0.420765714392231	0.673936182029218	0.691627006807485	-4.60683
DDX39B	0.248062231319798	9.39419482375133e-16	0.420765714392231	0.673936182029218	0.691627006807485	-4.60683
BRD2	0.248062231319798	9.39419482375133e-16	0.420765714392231	0.673936182029218	0.691627006807485	-4.60683
TAPBP	0.248062231319798	9.39419482375133e-16	0.420765714392231	0.673936182029218	0.691627006807485	-4.60683
FKBP5	0.248062231319798	9.39419482375133e-16	0.420765714392231	0.673936182029218	0.691627006807485	-4.60683
ZFAND3	0.248062231319798	9.39419482375133e-16	0.420765714392231	0.673936182029218	0.691627006807485	-4.60683
BTBD9	0.248062231319798	9.39419482375133e-16	0.420765714392231	0.673936182029218	0.691627006807485	-4.60683
CCND3	0.248062231319798	9.39419482375133e-16	0.420765714392231	0.673936182029218	0.691627006807485	-4.60683
UBR2	0.248062231319798	9.39419482375133e-16	0.420765714392231	0.673936182029218	0.691627006807485	-4.60683
TRAM2	0.248062231319798	9.39419482375133e-16	0.420765714392231	0.673936182029218	0.691627006807485	-4.60683
ELOVL5	0.248062231319798	9.39419482375133e-16	0.420765714392231	0.673936182029218	0.691627006807485	-4.60683
PHF3	0.248062231319798	9.39419482375133e-16	0.420765714392231	0.673936182029218	0.691627006807485	-4.60683
LMBRD1	0.248062231319798	9.39419482375133e-16	0.420765714392231	0.673936182029218	0.691627006807485	-4.60683
SENP6	0.248062231319798	9.39419482375133e-16	0.420765714392231	0.673936182029218	0.691627006807485	-4.60683
PHIP	0.248062231319798	9.39419482375133e-16	0.420765714392231	0.673936182029218	0.691627006807485	-4.60683
HMGN3	0.248062231319798	9.39419482375133e-16	0.420765714392231	0.673936182029218	0.691627006807485	-4.60683
ZNF292	0.248062231319798	9.39419482375133e-16	0.420765714392231	0.673936182029218	0.691627006807485	-4.60683
PNRC1	0.248062231319798	9.39419482375133e-16	0.420765714392231	0.673936182029218	0.691627006807485	-4.60683
UBE2J1	0.248062231319798	9.39419482375133e-16	0.420765714392231	0.673936182029218	0.691627006807485	-4.60683
PNISR	0.248062231319798	9.39419482375133e-16	0.420765714392231	0.673936182029218	0.691627006807485	-4.60683
ASCC3	0.248062231319798	9.39419482375133e-16	0.420765714392231	0.673936182029218	0.691627006807485	-4.60683
PRDM1	0.248062231319798	9.39419482375133e-16	0.420765714392231	0.673936182029218	0.691627006807485	-4.60683
SEC63	0.248062231319798	9.39419482375133e-16	0.420765714392231	0.673936182029218	0.691627006807485	-4.60683
FOXO3	0.248062231319798	9.39419482375133e-16	0.420765714392231	0.673936182029218	0.691627006807485	-4.60683
CEP85L	0.248062231319798	9.39419482375133e-16	0.420765714392231	0.673936182029218	0.691627006807485	-4.60683
MAN1A1	0.248062231319798	9.39419482375133e-16	0.420765714392231	0.673936182029218	0.691627006807485	-4.60683
STX7	0.248062231319798	9.39419482375133e-16	0.420765714392231	0.673936182029218	0.691627006807485	-4.60683
BCLAF1	0.248062231319798	9.39419482375133e-16	0.420765714392231	0.673936182029218	0.691627006807485	-4.60683
HIVEP2	0.248062231319798	9.39419482375133e-16	0.420765714392231	0.673936182029218	0.691627006807485	-4.60683
SYNE1	0.248062231319798	9.39419482375133e-16	0.420765714392231	0.673936182029218	0.691627006807485	-4.60683
ARID1B	0.248062231319798	9.39419482375133e-16	0.420765714392231	0.673936182029218	0.691627006807485	-4.60683
EZR	0.248062231319798	9.39419482375133e-16	0.420765714392231	0.673936182029218	0.691627006807485	-4.60683
QKI	0.248062231319798	9.39419482375133e-16	0.420765714392231	0.673936182029218	0.691627006807485	-4.60683
ACTB	0.248062231319798	9.39419482375133e-16	0.420765714392231	0.673936182029218	0.691627006807485	-4.60683
UMAD1	0.248062231319798	9.39419482375133e-16	0.420765714392231	0.673936182029218	0.691627006807485	-4.60683
GLCCI1	0.248062231319798	9.39419482375133e-16	0.420765714392231	0.673936182029218	0.691627006807485	-4.60683
HDAC9	0.248062231319798	9.39419482375133e-16	0.420765714392231	0.673936182029218	0.691627006807485	-4.60683
TRA2A	0.248062231319798	9.39419482375133e-16	0.420765714392231	0.673936182029218	0.691627006807485	-4.60683
OSBPL3	0.248062231319798	9.39419482375133e-16	0.420765714392231	0.673936182029218	0.691627006807485	-4.60683
TAX1BP1	0.248062231319798	9.39419482375133e-16	0.420765714392231	0.673936182029218	0.691627006807485	-4.60683
ELMO1	0.248062231319798	9.39419482375133e-16	0.420765714392231	0.673936182029218	0.691627006807485	-4.60683
CDK13	0.248062231319798	9.39419482375133e-16	0.420765714392231	0.673936182029218	0.691627006807485	-4.60683
DBNL	0.248062231319798	9.39419482375133e-16	0.420765714392231	0.673936182029218	0.691627006807485	-4.60683
ZMIZ2	0.248062231319798	9.39419482375133e-16	0.420765714392231	0.673936182029218	0.691627006807485	-4.60683
CCM2	0.248062231319798	9.39419482375133e-16	0.420765714392231	0.673936182029218	0.691627006807485	-4.60683
TNS3	0.248062231319798	9.39419482375133e-16	0.420765714392231	0.673936182029218	0.691627006807485	-4.60683
IKZF1	0.248062231319798	9.39419482375133e-16	0.420765714392231	0.673936182029218	0.691627006807485	-4.60683
VOPP1	0.248062231319798	9.39419482375133e-16	0.420765714392231	0.673936182029218	0.691627006807485	-4.60683
GTF2I	0.248062231319798	9.39419482375133e-16	0.420765714392231	0.673936182029218	0.691627006807485	-4.60683
DMTF1	0.248062231319798	9.39419482375133e-16	0.420765714392231	0.673936182029218	0.691627006807485	-4.60683
CDK14	0.248062231319798	9.39419482375133e-16	0.420765714392231	0.673936182029218	0.691627006807485	-4.60683
AKAP9	0.248062231319798	9.39419482375133e-16	0.420765714392231	0.673936182029218	0.691627006807485	-4.60683
CDK6	0.248062231319798	9.39419482375133e-16	0.420765714392231	0.673936182029218	0.691627006807485	-4.60683
TRRAP	0.248062231319798	9.39419482375133e-16	0.420765714392231	0.673936182029218	0.691627006807485	-4.60683
CUX1	0.248062231319798	9.39419482375133e-16	0.420765714392231	0.673936182029218	0.691627006807485	-4.60683
KMT2E	0.248062231319798	9.39419482375133e-16	0.420765714392231	0.673936182029218	0.691627006807485	-4.60683
SRPK2	0.248062231319798	9.39419482375133e-16	0.420765714392231	0.673936182029218	0.691627006807485	-4.60683
COG5	0.248062231319798	9.39419482375133e-16	0.420765714392231	0.673936182029218	0.691627006807485	-4.60683
IMMP2L	0.248062231319798	9.39419482375133e-16	0.420765714392231	0.673936182029218	0.691627006807485	-4.60683
MDFIC	0.248062231319798	9.39419482375133e-16	0.420765714392231	0.673936182029218	0.691627006807485	-4.60683
FAM3C	0.248062231319798	9.39419482375133e-16	0.420765714392231	0.673936182029218	0.691627006807485	-4.60683
CADPS2	0.248062231319798	9.39419482375133e-16	0.420765714392231	0.673936182029218	0.691627006807485	-4.60683
SND1	0.248062231319798	9.39419482375133e-16	0.420765714392231	0.673936182029218	0.691627006807485	-4.60683
UBE2H	0.248062231319798	9.39419482375133e-16	0.420765714392231	0.673936182029218	0.691627006807485	-4.60683
MKLN1	0.248062231319798	9.39419482375133e-16	0.420765714392231	0.673936182029218	0.691627006807485	-4.60683
EXOC4	0.248062231319798	9.39419482375133e-16	0.420765714392231	0.673936182029218	0.691627006807485	-4.60683
CNOT4	0.248062231319798	9.39419482375133e-16	0.420765714392231	0.673936182029218	0.691627006807485	-4.60683
CREB3L2	0.248062231319798	9.39419482375133e-16	0.420765714392231	0.673936182029218	0.691627006807485	-4.60683
LUC7L2	0.248062231319798	9.39419482375133e-16	0.420765714392231	0.673936182029218	0.691627006807485	-4.60683
HIPK2	0.248062231319798	9.39419482375133e-16	0.420765714392231	0.673936182029218	0.691627006807485	-4.60683
KMT2C	0.248062231319798	9.39419482375133e-16	0.420765714392231	0.673936182029218	0.691627006807485	-4.60683
RBM33	0.248062231319798	9.39419482375133e-16	0.420765714392231	0.673936182029218	0.691627006807485	-4.60683
UBE3C	0.248062231319798	9.39419482375133e-16	0.420765714392231	0.673936182029218	0.691627006807485	-4.60683
ESYT2	0.248062231319798	9.39419482375133e-16	0.420765714392231	0.673936182029218	0.691627006807485	-4.60683
SH3KBP1	0.248062231319798	9.39419482375133e-16	0.420765714392231	0.673936182029218	0.691627006807485	-4.60683
SAT1	0.248062231319798	9.39419482375133e-16	0.420765714392231	0.673936182029218	0.691627006807485	-4.60683
USP9X	0.248062231319798	9.39419482375133e-16	0.420765714392231	0.673936182029218	0.691627006807485	-4.60683
KDM6A	0.248062231319798	9.39419482375133e-16	0.420765714392231	0.673936182029218	0.691627006807485	-4.60683
PIM2	0.248062231319798	9.39419482375133e-16	0.420765714392231	0.673936182029218	0.691627006807485	-4.60683
HUWE1	0.248062231319798	9.39419482375133e-16	0.420765714392231	0.673936182029218	0.691627006807485	-4.60683
MSN	0.248062231319798	9.39419482375133e-16	0.420765714392231	0.673936182029218	0.691627006807485	-4.60683
OGT	0.248062231319798	9.39419482375133e-16	0.420765714392231	0.673936182029218	0.691627006807485	-4.60683
ATRX	0.248062231319798	9.39419482375133e-16	0.420765714392231	0.673936182029218	0.691627006807485	-4.60683
TSC22D3	0.248062231319798	9.39419482375133e-16	0.420765714392231	0.673936182029218	0.691627006807485	-4.60683
DOCK11	0.248062231319798	9.39419482375133e-16	0.420765714392231	0.673936182029218	0.691627006807485	-4.60683
TNKS	0.248062231319798	9.39419482375133e-16	0.420765714392231	0.673936182029218	0.691627006807485	-4.60683
XKR6	0.248062231319798	9.39419482375133e-16	0.420765714392231	0.673936182029218	0.691627006807485	-4.60683
BLK	0.248062231319798	9.39419482375133e-16	0.420765714392231	0.673936182029218	0.691627006807485	-4.60683
PCM1	0.248062231319798	9.39419482375133e-16	0.420765714392231	0.673936182029218	0.691627006807485	-4.60683
PPP3CC	0.248062231319798	9.39419482375133e-16	0.420765714392231	0.673936182029218	0.691627006807485	-4.60683
ENTPD4	0.248062231319798	9.39419482375133e-16	0.420765714392231	0.673936182029218	0.691627006807485	-4.60683
PTK2B	0.248062231319798	9.39419482375133e-16	0.420765714392231	0.673936182029218	0.691627006807485	-4.60683
NUGGC	0.248062231319798	9.39419482375133e-16	0.420765714392231	0.673936182029218	0.691627006807485	-4.60683
PLPP5	0.248062231319798	9.39419482375133e-16	0.420765714392231	0.673936182029218	0.691627006807485	-4.60683
PLEKHA2	0.248062231319798	9.39419482375133e-16	0.420765714392231	0.673936182029218	0.691627006807485	-4.60683
KAT6A	0.248062231319798	9.39419482375133e-16	0.420765714392231	0.673936182029218	0.691627006807485	-4.60683
SPIDR	0.248062231319798	9.39419482375133e-16	0.420765714392231	0.673936182029218	0.691627006807485	-4.60683
PCMTD1	0.248062231319798	9.39419482375133e-16	0.420765714392231	0.673936182029218	0.691627006807485	-4.60683
RB1CC1	0.248062231319798	9.39419482375133e-16	0.420765714392231	0.673936182029218	0.691627006807485	-4.60683
LYN	0.248062231319798	9.39419482375133e-16	0.420765714392231	0.673936182029218	0.691627006807485	-4.60683
RAB2A	0.248062231319798	9.39419482375133e-16	0.420765714392231	0.673936182029218	0.691627006807485	-4.60683
PDE7A	0.248062231319798	9.39419482375133e-16	0.420765714392231	0.673936182029218	0.691627006807485	-4.60683
ARFGEF1	0.248062231319798	9.39419482375133e-16	0.420765714392231	0.673936182029218	0.691627006807485	-4.60683
NCOA2	0.248062231319798	9.39419482375133e-16	0.420765714392231	0.673936182029218	0.691627006807485	-4.60683
TRAM1	0.248062231319798	9.39419482375133e-16	0.420765714392231	0.673936182029218	0.691627006807485	-4.60683
STAU2	0.248062231319798	9.39419482375133e-16	0.420765714392231	0.673936182029218	0.691627006807485	-4.60683
TPD52	0.248062231319798	9.39419482375133e-16	0.420765714392231	0.673936182029218	0.691627006807485	-4.60683
TP53INP1	0.248062231319798	9.39419482375133e-16	0.420765714392231	0.673936182029218	0.691627006807485	-4.60683
MTDH	0.248062231319798	9.39419482375133e-16	0.420765714392231	0.673936182029218	0.691627006807485	-4.60683
VPS13B	0.248062231319798	9.39419482375133e-16	0.420765714392231	0.673936182029218	0.691627006807485	-4.60683
RNF19A	0.248062231319798	9.39419482375133e-16	0.420765714392231	0.673936182029218	0.691627006807485	-4.60683
YWHAZ	0.248062231319798	9.39419482375133e-16	0.420765714392231	0.673936182029218	0.691627006807485	-4.60683
UBR5	0.248062231319798	9.39419482375133e-16	0.420765714392231	0.673936182029218	0.691627006807485	-4.60683
EXT1	0.248062231319798	9.39419482375133e-16	0.420765714392231	0.673936182029218	0.691627006807485	-4.60683
SAMD12	0.248062231319798	9.39419482375133e-16	0.420765714392231	0.673936182029218	0.691627006807485	-4.60683
ZHX2	0.248062231319798	9.39419482375133e-16	0.420765714392231	0.673936182029218	0.691627006807485	-4.60683
FAM49B	0.248062231319798	9.39419482375133e-16	0.420765714392231	0.673936182029218	0.691627006807485	-4.60683
TRAPPC9	0.248062231319798	9.39419482375133e-16	0.420765714392231	0.673936182029218	0.691627006807485	-4.60683
DENND3	0.248062231319798	9.39419482375133e-16	0.420765714392231	0.673936182029218	0.691627006807485	-4.60683
DOCK8	0.248062231319798	9.39419482375133e-16	0.420765714392231	0.673936182029218	0.691627006807485	-4.60683
SMARCA2	0.248062231319798	9.39419482375133e-16	0.420765714392231	0.673936182029218	0.691627006807485	-4.60683
RIC1	0.248062231319798	9.39419482375133e-16	0.420765714392231	0.673936182029218	0.691627006807485	-4.60683
KDM4C	0.248062231319798	9.39419482375133e-16	0.420765714392231	0.673936182029218	0.691627006807485	-4.60683
NFX1	0.248062231319798	9.39419482375133e-16	0.420765714392231	0.673936182029218	0.691627006807485	-4.60683
ZCCHC7	0.248062231319798	9.39419482375133e-16	0.420765714392231	0.673936182029218	0.691627006807485	-4.60683
SECISBP2	0.248062231319798	9.39419482375133e-16	0.420765714392231	0.673936182029218	0.691627006807485	-4.60683
SEMA4D	0.248062231319798	9.39419482375133e-16	0.420765714392231	0.673936182029218	0.691627006807485	-4.60683
SYK	0.248062231319798	9.39419482375133e-16	0.420765714392231	0.673936182029218	0.691627006807485	-4.60683
AUH	0.248062231319798	9.39419482375133e-16	0.420765714392231	0.673936182029218	0.691627006807485	-4.60683
FAM120A	0.248062231319798	9.39419482375133e-16	0.420765714392231	0.673936182029218	0.691627006807485	-4.60683
SLC44A1	0.248062231319798	9.39419482375133e-16	0.420765714392231	0.673936182029218	0.691627006807485	-4.60683
PALM2.AKAP2	0.248062231319798	9.39419482375133e-16	0.420765714392231	0.673936182029218	0.691627006807485	-4.60683
AKNA	0.248062231319798	9.39419482375133e-16	0.420765714392231	0.673936182029218	0.691627006807485	-4.60683
CNTRL	0.248062231319798	9.39419482375133e-16	0.420765714392231	0.673936182029218	0.691627006807485	-4.60683
STRBP	0.248062231319798	9.39419482375133e-16	0.420765714392231	0.673936182029218	0.691627006807485	-4.60683
DENND1A	0.248062231319798	9.39419482375133e-16	0.420765714392231	0.673936182029218	0.691627006807485	-4.60683
FNBP1	0.248062231319798	9.39419482375133e-16	0.420765714392231	0.673936182029218	0.691627006807485	-4.60683
PRRC2B	0.248062231319798	9.39419482375133e-16	0.420765714392231	0.673936182029218	0.691627006807485	-4.60683
RAPGEF1	0.248062231319798	9.39419482375133e-16	0.420765714392231	0.673936182029218	0.691627006807485	-4.60683
SETX	0.248062231319798	9.39419482375133e-16	0.420765714392231	0.673936182029218	0.691627006807485	-4.60683
EHMT1	0.248062231319798	9.39419482375133e-16	0.420765714392231	0.673936182029218	0.691627006807485	-4.60683
NAP1L4	0.248062231319798	9.39419482375133e-16	0.420765714392231	0.673936182029218	0.691627006807485	-4.60683
STIM1	0.248062231319798	9.39419482375133e-16	0.420765714392231	0.673936182029218	0.691627006807485	-4.60683
USP47	0.248062231319798	9.39419482375133e-16	0.420765714392231	0.673936182029218	0.691627006807485	-4.60683
COPB1	0.248062231319798	9.39419482375133e-16	0.420765714392231	0.673936182029218	0.691627006807485	-4.60683
CD44	0.248062231319798	9.39419482375133e-16	0.420765714392231	0.673936182029218	0.691627006807485	-4.60683
CELF1	0.248062231319798	9.39419482375133e-16	0.420765714392231	0.673936182029218	0.691627006807485	-4.60683
FNBP4	0.248062231319798	9.39419482375133e-16	0.420765714392231	0.673936182029218	0.691627006807485	-4.60683
MS4A1	0.248062231319798	9.39419482375133e-16	0.420765714392231	0.673936182029218	0.691627006807485	-4.60683
AHNAK	0.248062231319798	9.39419482375133e-16	0.420765714392231	0.673936182029218	0.691627006807485	-4.60683
SYVN1	0.248062231319798	9.39419482375133e-16	0.420765714392231	0.673936182029218	0.691627006807485	-4.60683
EHBP1L1	0.248062231319798	9.39419482375133e-16	0.420765714392231	0.673936182029218	0.691627006807485	-4.60683
PACS1	0.248062231319798	9.39419482375133e-16	0.420765714392231	0.673936182029218	0.691627006807485	-4.60683
C11ORF80	0.248062231319798	9.39419482375133e-16	0.420765714392231	0.673936182029218	0.691627006807485	-4.60683
KDM2A	0.248062231319798	9.39419482375133e-16	0.420765714392231	0.673936182029218	0.691627006807485	-4.60683
PPP6R3	0.248062231319798	9.39419482375133e-16	0.420765714392231	0.673936182029218	0.691627006807485	-4.60683
FCHSD2	0.248062231319798	9.39419482375133e-16	0.420765714392231	0.673936182029218	0.691627006807485	-4.60683
SPCS2	0.248062231319798	9.39419482375133e-16	0.420765714392231	0.673936182029218	0.691627006807485	-4.60683
RSF1	0.248062231319798	9.39419482375133e-16	0.420765714392231	0.673936182029218	0.691627006807485	-4.60683
RAB30	0.248062231319798	9.39419482375133e-16	0.420765714392231	0.673936182029218	0.691627006807485	-4.60683
PCF11	0.248062231319798	9.39419482375133e-16	0.420765714392231	0.673936182029218	0.691627006807485	-4.60683
PICALM	0.248062231319798	9.39419482375133e-16	0.420765714392231	0.673936182029218	0.691627006807485	-4.60683
TAF1D	0.248062231319798	9.39419482375133e-16	0.420765714392231	0.673936182029218	0.691627006807485	-4.60683
MAML2	0.248062231319798	9.39419482375133e-16	0.420765714392231	0.673936182029218	0.691627006807485	-4.60683
ATM	0.248062231319798	9.39419482375133e-16	0.420765714392231	0.673936182029218	0.691627006807485	-4.60683
POU2AF1	0.248062231319798	9.39419482375133e-16	0.420765714392231	0.673936182029218	0.691627006807485	-4.60683
SIK3	0.248062231319798	9.39419482375133e-16	0.420765714392231	0.673936182029218	0.691627006807485	-4.60683
KMT2A	0.248062231319798	9.39419482375133e-16	0.420765714392231	0.673936182029218	0.691627006807485	-4.60683
SRPRA	0.248062231319798	9.39419482375133e-16	0.420765714392231	0.673936182029218	0.691627006807485	-4.60683
ETS1	0.248062231319798	9.39419482375133e-16	0.420765714392231	0.673936182029218	0.691627006807485	-4.60683
FLI1	0.248062231319798	9.39419482375133e-16	0.420765714392231	0.673936182029218	0.691627006807485	-4.60683
LARP4B	0.248062231319798	9.39419482375133e-16	0.420765714392231	0.673936182029218	0.691627006807485	-4.60683
KLF6	0.248062231319798	9.39419482375133e-16	0.420765714392231	0.673936182029218	0.691627006807485	-4.60683
SFMBT2	0.248062231319798	9.39419482375133e-16	0.420765714392231	0.673936182029218	0.691627006807485	-4.60683
CELF2	0.248062231319798	9.39419482375133e-16	0.420765714392231	0.673936182029218	0.691627006807485	-4.60683
UPF2	0.248062231319798	9.39419482375133e-16	0.420765714392231	0.673936182029218	0.691627006807485	-4.60683
CAMK1D	0.248062231319798	9.39419482375133e-16	0.420765714392231	0.673936182029218	0.691627006807485	-4.60683
FAM107B	0.248062231319798	9.39419482375133e-16	0.420765714392231	0.673936182029218	0.691627006807485	-4.60683
VIM	0.248062231319798	9.39419482375133e-16	0.420765714392231	0.673936182029218	0.691627006807485	-4.60683
MLLT10	0.248062231319798	9.39419482375133e-16	0.420765714392231	0.673936182029218	0.691627006807485	-4.60683
DNAJC1	0.248062231319798	9.39419482375133e-16	0.420765714392231	0.673936182029218	0.691627006807485	-4.60683
PIP4K2A	0.248062231319798	9.39419482375133e-16	0.420765714392231	0.673936182029218	0.691627006807485	-4.60683
APBB1IP	0.248062231319798	9.39419482375133e-16	0.420765714392231	0.673936182029218	0.691627006807485	-4.60683
ABI1	0.248062231319798	9.39419482375133e-16	0.420765714392231	0.673936182029218	0.691627006807485	-4.60683
WAC	0.248062231319798	9.39419482375133e-16	0.420765714392231	0.673936182029218	0.691627006807485	-4.60683
ZEB1	0.248062231319798	9.39419482375133e-16	0.420765714392231	0.673936182029218	0.691627006807485	-4.60683
EPC1	0.248062231319798	9.39419482375133e-16	0.420765714392231	0.673936182029218	0.691627006807485	-4.60683
MAPK8	0.248062231319798	9.39419482375133e-16	0.420765714392231	0.673936182029218	0.691627006807485	-4.60683
WDFY4	0.248062231319798	9.39419482375133e-16	0.420765714392231	0.673936182029218	0.691627006807485	-4.60683
SGMS1	0.248062231319798	9.39419482375133e-16	0.420765714392231	0.673936182029218	0.691627006807485	-4.60683
CCDC6	0.248062231319798	9.39419482375133e-16	0.420765714392231	0.673936182029218	0.691627006807485	-4.60683
ARID5B	0.248062231319798	9.39419482375133e-16	0.420765714392231	0.673936182029218	0.691627006807485	-4.60683
JMJD1C	0.248062231319798	9.39419482375133e-16	0.420765714392231	0.673936182029218	0.691627006807485	-4.60683
HERC4	0.248062231319798	9.39419482375133e-16	0.420765714392231	0.673936182029218	0.691627006807485	-4.60683
SRGN	0.248062231319798	9.39419482375133e-16	0.420765714392231	0.673936182029218	0.691627006807485	-4.60683
DDIT4	0.248062231319798	9.39419482375133e-16	0.420765714392231	0.673936182029218	0.691627006807485	-4.60683
ADK	0.248062231319798	9.39419482375133e-16	0.420765714392231	0.673936182029218	0.691627006807485	-4.60683
KAT6B	0.248062231319798	9.39419482375133e-16	0.420765714392231	0.673936182029218	0.691627006807485	-4.60683
BTAF1	0.248062231319798	9.39419482375133e-16	0.420765714392231	0.673936182029218	0.691627006807485	-4.60683
ENTPD1	0.248062231319798	9.39419482375133e-16	0.420765714392231	0.673936182029218	0.691627006807485	-4.60683
BLNK	0.248062231319798	9.39419482375133e-16	0.420765714392231	0.673936182029218	0.691627006807485	-4.60683
TM9SF3	0.248062231319798	9.39419482375133e-16	0.420765714392231	0.673936182029218	0.691627006807485	-4.60683
LCOR	0.248062231319798	9.39419482375133e-16	0.420765714392231	0.673936182029218	0.691627006807485	-4.60683
GBF1	0.248062231319798	9.39419482375133e-16	0.420765714392231	0.673936182029218	0.691627006807485	-4.60683
NT5C2	0.248062231319798	9.39419482375133e-16	0.420765714392231	0.673936182029218	0.691627006807485	-4.60683
PDCD4	0.248062231319798	9.39419482375133e-16	0.420765714392231	0.673936182029218	0.691627006807485	-4.60683
VTI1A	0.248062231319798	9.39419482375133e-16	0.420765714392231	0.673936182029218	0.691627006807485	-4.60683
EIF3A	0.248062231319798	9.39419482375133e-16	0.420765714392231	0.673936182029218	0.691627006807485	-4.60683
GRK5	0.248062231319798	9.39419482375133e-16	0.420765714392231	0.673936182029218	0.691627006807485	-4.60683
CHST15	0.248062231319798	9.39419482375133e-16	0.420765714392231	0.673936182029218	0.691627006807485	-4.60683
KDM5A	0.248062231319798	9.39419482375133e-16	0.420765714392231	0.673936182029218	0.691627006807485	-4.60683
WNK1	0.248062231319798	9.39419482375133e-16	0.420765714392231	0.673936182029218	0.691627006807485	-4.60683
ERC1	0.248062231319798	9.39419482375133e-16	0.420765714392231	0.673936182029218	0.691627006807485	-4.60683
CLEC2D	0.248062231319798	9.39419482375133e-16	0.420765714392231	0.673936182029218	0.691627006807485	-4.60683
ETV6	0.248062231319798	9.39419482375133e-16	0.420765714392231	0.673936182029218	0.691627006807485	-4.60683
ATF7IP	0.248062231319798	9.39419482375133e-16	0.420765714392231	0.673936182029218	0.691627006807485	-4.60683
ETNK1	0.248062231319798	9.39419482375133e-16	0.420765714392231	0.673936182029218	0.691627006807485	-4.60683
LRMP	0.248062231319798	9.39419482375133e-16	0.420765714392231	0.673936182029218	0.691627006807485	-4.60683
ITPR2	0.248062231319798	9.39419482375133e-16	0.420765714392231	0.673936182029218	0.691627006807485	-4.60683
CCDC91	0.248062231319798	9.39419482375133e-16	0.420765714392231	0.673936182029218	0.691627006807485	-4.60683
DENND5B	0.248062231319798	9.39419482375133e-16	0.420765714392231	0.673936182029218	0.691627006807485	-4.60683
BICD1	0.248062231319798	9.39419482375133e-16	0.420765714392231	0.673936182029218	0.691627006807485	-4.60683
ARID2	0.248062231319798	9.39419482375133e-16	0.420765714392231	0.673936182029218	0.691627006807485	-4.60683
SLC38A1	0.248062231319798	9.39419482375133e-16	0.420765714392231	0.673936182029218	0.691627006807485	-4.60683
SLC38A2	0.248062231319798	9.39419482375133e-16	0.420765714392231	0.673936182029218	0.691627006807485	-4.60683
SPATS2	0.248062231319798	9.39419482375133e-16	0.420765714392231	0.673936182029218	0.691627006807485	-4.60683
DIP2B	0.248062231319798	9.39419482375133e-16	0.420765714392231	0.673936182029218	0.691627006807485	-4.60683
NCKAP1L	0.248062231319798	9.39419482375133e-16	0.420765714392231	0.673936182029218	0.691627006807485	-4.60683
STAT2	0.248062231319798	9.39419482375133e-16	0.420765714392231	0.673936182029218	0.691627006807485	-4.60683
OS9	0.248062231319798	9.39419482375133e-16	0.420765714392231	0.673936182029218	0.691627006807485	-4.60683
USP15	0.248062231319798	9.39419482375133e-16	0.420765714392231	0.673936182029218	0.691627006807485	-4.60683
MON2	0.248062231319798	9.39419482375133e-16	0.420765714392231	0.673936182029218	0.691627006807485	-4.60683
MDM2	0.248062231319798	9.39419482375133e-16	0.420765714392231	0.673936182029218	0.691627006807485	-4.60683
ZFC3H1	0.248062231319798	9.39419482375133e-16	0.420765714392231	0.673936182029218	0.691627006807485	-4.60683
OSBPL8	0.248062231319798	9.39419482375133e-16	0.420765714392231	0.673936182029218	0.691627006807485	-4.60683
PPP1R12A	0.248062231319798	9.39419482375133e-16	0.420765714392231	0.673936182029218	0.691627006807485	-4.60683
ATP2B1	0.248062231319798	9.39419482375133e-16	0.420765714392231	0.673936182029218	0.691627006807485	-4.60683
BTG1	0.248062231319798	9.39419482375133e-16	0.420765714392231	0.673936182029218	0.691627006807485	-4.60683
HSP90B1	0.248062231319798	9.39419482375133e-16	0.420765714392231	0.673936182029218	0.691627006807485	-4.60683
CHST11	0.248062231319798	9.39419482375133e-16	0.420765714392231	0.673936182029218	0.691627006807485	-4.60683
HECTD4	0.248062231319798	9.39419482375133e-16	0.420765714392231	0.673936182029218	0.691627006807485	-4.60683
MED13L	0.248062231319798	9.39419482375133e-16	0.420765714392231	0.673936182029218	0.691627006807485	-4.60683
TAOK3	0.248062231319798	9.39419482375133e-16	0.420765714392231	0.673936182029218	0.691627006807485	-4.60683
SPPL3	0.248062231319798	9.39419482375133e-16	0.420765714392231	0.673936182029218	0.691627006807485	-4.60683
ANAPC5	0.248062231319798	9.39419482375133e-16	0.420765714392231	0.673936182029218	0.691627006807485	-4.60683
CLIP1	0.248062231319798	9.39419482375133e-16	0.420765714392231	0.673936182029218	0.691627006807485	-4.60683
NCOR2	0.248062231319798	9.39419482375133e-16	0.420765714392231	0.673936182029218	0.691627006807485	-4.60683
UBC	0.248062231319798	9.39419482375133e-16	0.420765714392231	0.673936182029218	0.691627006807485	-4.60683
SFSWAP	0.248062231319798	9.39419482375133e-16	0.420765714392231	0.673936182029218	0.691627006807485	-4.60683
GOLGA3	0.248062231319798	9.39419482375133e-16	0.420765714392231	0.673936182029218	0.691627006807485	-4.60683
MPHOSPH8	0.248062231319798	9.39419482375133e-16	0.420765714392231	0.673936182029218	0.691627006807485	-4.60683
PSPC1	0.248062231319798	9.39419482375133e-16	0.420765714392231	0.673936182029218	0.691627006807485	-4.60683
ZMYM2	0.248062231319798	9.39419482375133e-16	0.420765714392231	0.673936182029218	0.691627006807485	-4.60683
PAN3	0.248062231319798	9.39419482375133e-16	0.420765714392231	0.673936182029218	0.691627006807485	-4.60683
N4BP2L2	0.248062231319798	9.39419482375133e-16	0.420765714392231	0.673936182029218	0.691627006807485	-4.60683
UFM1	0.248062231319798	9.39419482375133e-16	0.420765714392231	0.673936182029218	0.691627006807485	-4.60683
FOXO1	0.248062231319798	9.39419482375133e-16	0.420765714392231	0.673936182029218	0.691627006807485	-4.60683
ELF1	0.248062231319798	9.39419482375133e-16	0.420765714392231	0.673936182029218	0.691627006807485	-4.60683
LCP1	0.248062231319798	9.39419482375133e-16	0.420765714392231	0.673936182029218	0.691627006807485	-4.60683
RB1	0.248062231319798	9.39419482375133e-16	0.420765714392231	0.673936182029218	0.691627006807485	-4.60683
FNDC3A	0.248062231319798	9.39419482375133e-16	0.420765714392231	0.673936182029218	0.691627006807485	-4.60683
KLF12	0.248062231319798	9.39419482375133e-16	0.420765714392231	0.673936182029218	0.691627006807485	-4.60683
MYCBP2	0.248062231319798	9.39419482375133e-16	0.420765714392231	0.673936182029218	0.691627006807485	-4.60683
RBM26	0.248062231319798	9.39419482375133e-16	0.420765714392231	0.673936182029218	0.691627006807485	-4.60683
DNAJC3	0.248062231319798	9.39419482375133e-16	0.420765714392231	0.673936182029218	0.691627006807485	-4.60683
MBNL2	0.248062231319798	9.39419482375133e-16	0.420765714392231	0.673936182029218	0.691627006807485	-4.60683
TM9SF2	0.248062231319798	9.39419482375133e-16	0.420765714392231	0.673936182029218	0.691627006807485	-4.60683
NALCN	0.248062231319798	9.39419482375133e-16	0.420765714392231	0.673936182029218	0.691627006807485	-4.60683
ARGLU1	0.248062231319798	9.39419482375133e-16	0.420765714392231	0.673936182029218	0.691627006807485	-4.60683
ANKRD10	0.248062231319798	9.39419482375133e-16	0.420765714392231	0.673936182029218	0.691627006807485	-4.60683
GAS6	0.248062231319798	9.39419482375133e-16	0.420765714392231	0.673936182029218	0.691627006807485	-4.60683
HNRNPC	0.248062231319798	9.39419482375133e-16	0.420765714392231	0.673936182029218	0.691627006807485	-4.60683
SCFD1	0.248062231319798	9.39419482375133e-16	0.420765714392231	0.673936182029218	0.691627006807485	-4.60683
HECTD1	0.248062231319798	9.39419482375133e-16	0.420765714392231	0.673936182029218	0.691627006807485	-4.60683
SRP54	0.248062231319798	9.39419482375133e-16	0.420765714392231	0.673936182029218	0.691627006807485	-4.60683
RALGAPA1	0.248062231319798	9.39419482375133e-16	0.420765714392231	0.673936182029218	0.691627006807485	-4.60683
PNN	0.248062231319798	9.39419482375133e-16	0.420765714392231	0.673936182029218	0.691627006807485	-4.60683
NEMF	0.248062231319798	9.39419482375133e-16	0.420765714392231	0.673936182029218	0.691627006807485	-4.60683
NIN	0.248062231319798	9.39419482375133e-16	0.420765714392231	0.673936182029218	0.691627006807485	-4.60683
KTN1	0.248062231319798	9.39419482375133e-16	0.420765714392231	0.673936182029218	0.691627006807485	-4.60683
SYNE2	0.248062231319798	9.39419482375133e-16	0.420765714392231	0.673936182029218	0.691627006807485	-4.60683
FUT8	0.248062231319798	9.39419482375133e-16	0.420765714392231	0.673936182029218	0.691627006807485	-4.60683
GPHN	0.248062231319798	9.39419482375133e-16	0.420765714392231	0.673936182029218	0.691627006807485	-4.60683
RAD51B	0.248062231319798	9.39419482375133e-16	0.420765714392231	0.673936182029218	0.691627006807485	-4.60683
ZFP36L1	0.248062231319798	9.39419482375133e-16	0.420765714392231	0.673936182029218	0.691627006807485	-4.60683
SUSD6	0.248062231319798	9.39419482375133e-16	0.420765714392231	0.673936182029218	0.691627006807485	-4.60683
SRSF5	0.248062231319798	9.39419482375133e-16	0.420765714392231	0.673936182029218	0.691627006807485	-4.60683
SIPA1L1	0.248062231319798	9.39419482375133e-16	0.420765714392231	0.673936182029218	0.691627006807485	-4.60683
RBM25	0.248062231319798	9.39419482375133e-16	0.420765714392231	0.673936182029218	0.691627006807485	-4.60683
NUMB	0.248062231319798	9.39419482375133e-16	0.420765714392231	0.673936182029218	0.691627006807485	-4.60683
FOS	0.248062231319798	9.39419482375133e-16	0.420765714392231	0.673936182029218	0.691627006807485	-4.60683
CEP128	0.248062231319798	9.39419482375133e-16	0.420765714392231	0.673936182029218	0.691627006807485	-4.60683
SEL1L	0.248062231319798	9.39419482375133e-16	0.420765714392231	0.673936182029218	0.691627006807485	-4.60683
FOXN3	0.248062231319798	9.39419482375133e-16	0.420765714392231	0.673936182029218	0.691627006807485	-4.60683
CCDC88C	0.248062231319798	9.39419482375133e-16	0.420765714392231	0.673936182029218	0.691627006807485	-4.60683
PPP4R3A	0.248062231319798	9.39419482375133e-16	0.420765714392231	0.673936182029218	0.691627006807485	-4.60683
DDX24	0.248062231319798	9.39419482375133e-16	0.420765714392231	0.673936182029218	0.691627006807485	-4.60683
PPP2R5C	0.248062231319798	9.39419482375133e-16	0.420765714392231	0.673936182029218	0.691627006807485	-4.60683
TRAF3	0.248062231319798	9.39419482375133e-16	0.420765714392231	0.673936182029218	0.691627006807485	-4.60683
EIF5	0.248062231319798	9.39419482375133e-16	0.420765714392231	0.673936182029218	0.691627006807485	-4.60683
IGHA1	0.248062231319798	9.39419482375133e-16	0.420765714392231	0.673936182029218	0.691627006807485	-4.60683
IGHG1	0.248062231319798	9.39419482375133e-16	0.420765714392231	0.673936182029218	0.691627006807485	-4.60683
IGHG3	0.248062231319798	9.39419482375133e-16	0.420765714392231	0.673936182029218	0.691627006807485	-4.60683
HERC2	0.248062231319798	9.39419482375133e-16	0.420765714392231	0.673936182029218	0.691627006807485	-4.60683
KLF13	0.248062231319798	9.39419482375133e-16	0.420765714392231	0.673936182029218	0.691627006807485	-4.60683
EIF2AK4	0.248062231319798	9.39419482375133e-16	0.420765714392231	0.673936182029218	0.691627006807485	-4.60683
TRPM7	0.248062231319798	9.39419482375133e-16	0.420765714392231	0.673936182029218	0.691627006807485	-4.60683
MYO5A	0.248062231319798	9.39419482375133e-16	0.420765714392231	0.673936182029218	0.691627006807485	-4.60683
FAM214A	0.248062231319798	9.39419482375133e-16	0.420765714392231	0.673936182029218	0.691627006807485	-4.60683
CCPG1	0.248062231319798	9.39419482375133e-16	0.420765714392231	0.673936182029218	0.691627006807485	-4.60683
TCF12	0.248062231319798	9.39419482375133e-16	0.420765714392231	0.673936182029218	0.691627006807485	-4.60683
ADAM10	0.248062231319798	9.39419482375133e-16	0.420765714392231	0.673936182029218	0.691627006807485	-4.60683
SLTM	0.248062231319798	9.39419482375133e-16	0.420765714392231	0.673936182029218	0.691627006807485	-4.60683
ANXA2	0.248062231319798	9.39419482375133e-16	0.420765714392231	0.673936182029218	0.691627006807485	-4.60683
VPS13C	0.248062231319798	9.39419482375133e-16	0.420765714392231	0.673936182029218	0.691627006807485	-4.60683
USP3	0.248062231319798	9.39419482375133e-16	0.420765714392231	0.673936182029218	0.691627006807485	-4.60683
HERC1	0.248062231319798	9.39419482375133e-16	0.420765714392231	0.673936182029218	0.691627006807485	-4.60683
ZNF609	0.248062231319798	9.39419482375133e-16	0.420765714392231	0.673936182029218	0.691627006807485	-4.60683
DENND4A	0.248062231319798	9.39419482375133e-16	0.420765714392231	0.673936182029218	0.691627006807485	-4.60683
PIAS1	0.248062231319798	9.39419482375133e-16	0.420765714392231	0.673936182029218	0.691627006807485	-4.60683
ARIH1	0.248062231319798	9.39419482375133e-16	0.420765714392231	0.673936182029218	0.691627006807485	-4.60683
SCAPER	0.248062231319798	9.39419482375133e-16	0.420765714392231	0.673936182029218	0.691627006807485	-4.60683
AKAP13	0.248062231319798	9.39419482375133e-16	0.420765714392231	0.673936182029218	0.691627006807485	-4.60683
ISG20	0.248062231319798	9.39419482375133e-16	0.420765714392231	0.673936182029218	0.691627006807485	-4.60683
IQGAP1	0.248062231319798	9.39419482375133e-16	0.420765714392231	0.673936182029218	0.691627006807485	-4.60683
CHD2	0.248062231319798	9.39419482375133e-16	0.420765714392231	0.673936182029218	0.691627006807485	-4.60683
MCTP2	0.248062231319798	9.39419482375133e-16	0.420765714392231	0.673936182029218	0.691627006807485	-4.60683
MEF2A	0.248062231319798	9.39419482375133e-16	0.420765714392231	0.673936182029218	0.691627006807485	-4.60683
LRRK1	0.248062231319798	9.39419482375133e-16	0.420765714392231	0.673936182029218	0.691627006807485	-4.60683
LUC7L	0.248062231319798	9.39419482375133e-16	0.420765714392231	0.673936182029218	0.691627006807485	-4.60683
SRRM2	0.248062231319798	9.39419482375133e-16	0.420765714392231	0.673936182029218	0.691627006807485	-4.60683
CREBBP	0.248062231319798	9.39419482375133e-16	0.420765714392231	0.673936182029218	0.691627006807485	-4.60683
CIITA	0.248062231319798	9.39419482375133e-16	0.420765714392231	0.673936182029218	0.691627006807485	-4.60683
TXNDC11	0.248062231319798	9.39419482375133e-16	0.420765714392231	0.673936182029218	0.691627006807485	-4.60683
SNX29	0.248062231319798	9.39419482375133e-16	0.420765714392231	0.673936182029218	0.691627006807485	-4.60683
XYLT1	0.248062231319798	9.39419482375133e-16	0.420765714392231	0.673936182029218	0.691627006807485	-4.60683
SMG1	0.248062231319798	9.39419482375133e-16	0.420765714392231	0.673936182029218	0.691627006807485	-4.60683
GGA2	0.248062231319798	9.39419482375133e-16	0.420765714392231	0.673936182029218	0.691627006807485	-4.60683
PRKCB	0.248062231319798	9.39419482375133e-16	0.420765714392231	0.673936182029218	0.691627006807485	-4.60683
TNRC6A	0.248062231319798	9.39419482375133e-16	0.420765714392231	0.673936182029218	0.691627006807485	-4.60683
FUS	0.248062231319798	9.39419482375133e-16	0.420765714392231	0.673936182029218	0.691627006807485	-4.60683
ITFG1	0.248062231319798	9.39419482375133e-16	0.420765714392231	0.673936182029218	0.691627006807485	-4.60683
PHKB	0.248062231319798	9.39419482375133e-16	0.420765714392231	0.673936182029218	0.691627006807485	-4.60683
CYLD	0.248062231319798	9.39419482375133e-16	0.420765714392231	0.673936182029218	0.691627006807485	-4.60683
CHD9	0.248062231319798	9.39419482375133e-16	0.420765714392231	0.673936182029218	0.691627006807485	-4.60683
FTO	0.248062231319798	9.39419482375133e-16	0.420765714392231	0.673936182029218	0.691627006807485	-4.60683
HERPUD1	0.248062231319798	9.39419482375133e-16	0.420765714392231	0.673936182029218	0.691627006807485	-4.60683
NLRC5	0.248062231319798	9.39419482375133e-16	0.420765714392231	0.673936182029218	0.691627006807485	-4.60683
CNOT1	0.248062231319798	9.39419482375133e-16	0.420765714392231	0.673936182029218	0.691627006807485	-4.60683
NFAT5	0.248062231319798	9.39419482375133e-16	0.420765714392231	0.673936182029218	0.691627006807485	-4.60683
GLG1	0.248062231319798	9.39419482375133e-16	0.420765714392231	0.673936182029218	0.691627006807485	-4.60683
WWOX	0.248062231319798	9.39419482375133e-16	0.420765714392231	0.673936182029218	0.691627006807485	-4.60683
CMIP	0.248062231319798	9.39419482375133e-16	0.420765714392231	0.673936182029218	0.691627006807485	-4.60683
PLCG2	0.248062231319798	9.39419482375133e-16	0.420765714392231	0.673936182029218	0.691627006807485	-4.60683
MBTPS1	0.248062231319798	9.39419482375133e-16	0.420765714392231	0.673936182029218	0.691627006807485	-4.60683
IRF8	0.248062231319798	9.39419482375133e-16	0.420765714392231	0.673936182029218	0.691627006807485	-4.60683
SLC7A5	0.248062231319798	9.39419482375133e-16	0.420765714392231	0.673936182029218	0.691627006807485	-4.60683
CYBA	0.248062231319798	9.39419482375133e-16	0.420765714392231	0.673936182029218	0.691627006807485	-4.60683
ANKRD11	0.248062231319798	9.39419482375133e-16	0.420765714392231	0.673936182029218	0.691627006807485	-4.60683
TCF25	0.248062231319798	9.39419482375133e-16	0.420765714392231	0.673936182029218	0.691627006807485	-4.60683
VPS53	0.248062231319798	9.39419482375133e-16	0.420765714392231	0.673936182029218	0.691627006807485	-4.60683
PAFAH1B1	0.248062231319798	9.39419482375133e-16	0.420765714392231	0.673936182029218	0.691627006807485	-4.60683
P2RX5	0.248062231319798	9.39419482375133e-16	0.420765714392231	0.673936182029218	0.691627006807485	-4.60683
ATP2A3	0.248062231319798	9.39419482375133e-16	0.420765714392231	0.673936182029218	0.691627006807485	-4.60683
UBE2G1	0.248062231319798	9.39419482375133e-16	0.420765714392231	0.673936182029218	0.691627006807485	-4.60683
NLRP1	0.248062231319798	9.39419482375133e-16	0.420765714392231	0.673936182029218	0.691627006807485	-4.60683
ACADVL	0.248062231319798	9.39419482375133e-16	0.420765714392231	0.673936182029218	0.691627006807485	-4.60683
ACAP1	0.248062231319798	9.39419482375133e-16	0.420765714392231	0.673936182029218	0.691627006807485	-4.60683
NCOR1	0.248062231319798	9.39419482375133e-16	0.420765714392231	0.673936182029218	0.691627006807485	-4.60683
WSB1	0.248062231319798	9.39419482375133e-16	0.420765714392231	0.673936182029218	0.691627006807485	-4.60683
TAOK1	0.248062231319798	9.39419482375133e-16	0.420765714392231	0.673936182029218	0.691627006807485	-4.60683
SSH2	0.248062231319798	9.39419482375133e-16	0.420765714392231	0.673936182029218	0.691627006807485	-4.60683
ZNF207	0.248062231319798	9.39419482375133e-16	0.420765714392231	0.673936182029218	0.691627006807485	-4.60683
MYO1D	0.248062231319798	9.39419482375133e-16	0.420765714392231	0.673936182029218	0.691627006807485	-4.60683
GGNBP2	0.248062231319798	9.39419482375133e-16	0.420765714392231	0.673936182029218	0.691627006807485	-4.60683
SYNRG	0.248062231319798	9.39419482375133e-16	0.420765714392231	0.673936182029218	0.691627006807485	-4.60683
IKZF3	0.248062231319798	9.39419482375133e-16	0.420765714392231	0.673936182029218	0.691627006807485	-4.60683
STAT3	0.248062231319798	9.39419482375133e-16	0.420765714392231	0.673936182029218	0.691627006807485	-4.60683
GPATCH8	0.248062231319798	9.39419482375133e-16	0.420765714392231	0.673936182029218	0.691627006807485	-4.60683
KANSL1	0.248062231319798	9.39419482375133e-16	0.420765714392231	0.673936182029218	0.691627006807485	-4.60683
NPEPPS	0.248062231319798	9.39419482375133e-16	0.420765714392231	0.673936182029218	0.691627006807485	-4.60683
CDK5RAP3	0.248062231319798	9.39419482375133e-16	0.420765714392231	0.673936182029218	0.691627006807485	-4.60683
LUC7L3	0.248062231319798	9.39419482375133e-16	0.420765714392231	0.673936182029218	0.691627006807485	-4.60683
SPAG9	0.248062231319798	9.39419482375133e-16	0.420765714392231	0.673936182029218	0.691627006807485	-4.60683
MSI2	0.248062231319798	9.39419482375133e-16	0.420765714392231	0.673936182029218	0.691627006807485	-4.60683
VMP1	0.248062231319798	9.39419482375133e-16	0.420765714392231	0.673936182029218	0.691627006807485	-4.60683
BCAS3	0.248062231319798	9.39419482375133e-16	0.420765714392231	0.673936182029218	0.691627006807485	-4.60683
ERN1	0.248062231319798	9.39419482375133e-16	0.420765714392231	0.673936182029218	0.691627006807485	-4.60683
PECAM1	0.248062231319798	9.39419482375133e-16	0.420765714392231	0.673936182029218	0.691627006807485	-4.60683
DDX5	0.248062231319798	9.39419482375133e-16	0.420765714392231	0.673936182029218	0.691627006807485	-4.60683
BPTF	0.248062231319798	9.39419482375133e-16	0.420765714392231	0.673936182029218	0.691627006807485	-4.60683
GRB2	0.248062231319798	9.39419482375133e-16	0.420765714392231	0.673936182029218	0.691627006807485	-4.60683
SRSF2	0.248062231319798	9.39419482375133e-16	0.420765714392231	0.673936182029218	0.691627006807485	-4.60683
SEC14L1	0.248062231319798	9.39419482375133e-16	0.420765714392231	0.673936182029218	0.691627006807485	-4.60683
CYTH1	0.248062231319798	9.39419482375133e-16	0.420765714392231	0.673936182029218	0.691627006807485	-4.60683
RNF213	0.248062231319798	9.39419482375133e-16	0.420765714392231	0.673936182029218	0.691627006807485	-4.60683
RPTOR	0.248062231319798	9.39419482375133e-16	0.420765714392231	0.673936182029218	0.691627006807485	-4.60683
SLC38A10	0.248062231319798	9.39419482375133e-16	0.420765714392231	0.673936182029218	0.691627006807485	-4.60683
SMCHD1	0.248062231319798	9.39419482375133e-16	0.420765714392231	0.673936182029218	0.691627006807485	-4.60683
ANKRD12	0.248062231319798	9.39419482375133e-16	0.420765714392231	0.673936182029218	0.691627006807485	-4.60683
PTPN2	0.248062231319798	9.39419482375133e-16	0.420765714392231	0.673936182029218	0.691627006807485	-4.60683
ROCK1	0.248062231319798	9.39419482375133e-16	0.420765714392231	0.673936182029218	0.691627006807485	-4.60683
SETBP1	0.248062231319798	9.39419482375133e-16	0.420765714392231	0.673936182029218	0.691627006807485	-4.60683
DYM	0.248062231319798	9.39419482375133e-16	0.420765714392231	0.673936182029218	0.691627006807485	-4.60683
MBD2	0.248062231319798	9.39419482375133e-16	0.420765714392231	0.673936182029218	0.691627006807485	-4.60683
TCF4	0.248062231319798	9.39419482375133e-16	0.420765714392231	0.673936182029218	0.691627006807485	-4.60683
LMAN1	0.248062231319798	9.39419482375133e-16	0.420765714392231	0.673936182029218	0.691627006807485	-4.60683
BCL2	0.248062231319798	9.39419482375133e-16	0.420765714392231	0.673936182029218	0.691627006807485	-4.60683
ZNF407	0.248062231319798	9.39419482375133e-16	0.420765714392231	0.673936182029218	0.691627006807485	-4.60683
ATP9B	0.248062231319798	9.39419482375133e-16	0.420765714392231	0.673936182029218	0.691627006807485	-4.60683
GPCPD1	0.248062231319798	9.39419482375133e-16	0.420765714392231	0.673936182029218	0.691627006807485	-4.60683
RRBP1	0.248062231319798	9.39419482375133e-16	0.420765714392231	0.673936182029218	0.691627006807485	-4.60683
HM13	0.248062231319798	9.39419482375133e-16	0.420765714392231	0.673936182029218	0.691627006807485	-4.60683
ASXL1	0.248062231319798	9.39419482375133e-16	0.420765714392231	0.673936182029218	0.691627006807485	-4.60683
ITCH	0.248062231319798	9.39419482375133e-16	0.420765714392231	0.673936182029218	0.691627006807485	-4.60683
CPNE1	0.248062231319798	9.39419482375133e-16	0.420765714392231	0.673936182029218	0.691627006807485	-4.60683
RBM39	0.248062231319798	9.39419482375133e-16	0.420765714392231	0.673936182029218	0.691627006807485	-4.60683
PPP1R16B	0.248062231319798	9.39419482375133e-16	0.420765714392231	0.673936182029218	0.691627006807485	-4.60683
TOP1	0.248062231319798	9.39419482375133e-16	0.420765714392231	0.673936182029218	0.691627006807485	-4.60683
CHD6	0.248062231319798	9.39419482375133e-16	0.420765714392231	0.673936182029218	0.691627006807485	-4.60683
STK4	0.248062231319798	9.39419482375133e-16	0.420765714392231	0.673936182029218	0.691627006807485	-4.60683
NCOA3	0.248062231319798	9.39419482375133e-16	0.420765714392231	0.673936182029218	0.691627006807485	-4.60683
PREX1	0.248062231319798	9.39419482375133e-16	0.420765714392231	0.673936182029218	0.691627006807485	-4.60683
ARFGEF2	0.248062231319798	9.39419482375133e-16	0.420765714392231	0.673936182029218	0.691627006807485	-4.60683
PTPN1	0.248062231319798	9.39419482375133e-16	0.420765714392231	0.673936182029218	0.691627006807485	-4.60683
ZBP1	0.248062231319798	9.39419482375133e-16	0.420765714392231	0.673936182029218	0.691627006807485	-4.60683
DIDO1	0.248062231319798	9.39419482375133e-16	0.420765714392231	0.673936182029218	0.691627006807485	-4.60683
CIRBP	0.248062231319798	9.39419482375133e-16	0.420765714392231	0.673936182029218	0.691627006807485	-4.60683
TCF3	0.248062231319798	9.39419482375133e-16	0.420765714392231	0.673936182029218	0.691627006807485	-4.60683
OAZ1	0.248062231319798	9.39419482375133e-16	0.420765714392231	0.673936182029218	0.691627006807485	-4.60683
GNG7	0.248062231319798	9.39419482375133e-16	0.420765714392231	0.673936182029218	0.691627006807485	-4.60683
SAFB	0.248062231319798	9.39419482375133e-16	0.420765714392231	0.673936182029218	0.691627006807485	-4.60683
ILF3	0.248062231319798	9.39419482375133e-16	0.420765714392231	0.673936182029218	0.691627006807485	-4.60683
DNM2	0.248062231319798	9.39419482375133e-16	0.420765714392231	0.673936182029218	0.691627006807485	-4.60683
BRD4	0.248062231319798	9.39419482375133e-16	0.420765714392231	0.673936182029218	0.691627006807485	-4.60683
TPM4	0.248062231319798	9.39419482375133e-16	0.420765714392231	0.673936182029218	0.691627006807485	-4.60683
HSH2D	0.248062231319798	9.39419482375133e-16	0.420765714392231	0.673936182029218	0.691627006807485	-4.60683
MYO9B	0.248062231319798	9.39419482375133e-16	0.420765714392231	0.673936182029218	0.691627006807485	-4.60683
JUND	0.248062231319798	9.39419482375133e-16	0.420765714392231	0.673936182029218	0.691627006807485	-4.60683
SUGP2	0.248062231319798	9.39419482375133e-16	0.420765714392231	0.673936182029218	0.691627006807485	-4.60683
SIPA1L3	0.248062231319798	9.39419482375133e-16	0.420765714392231	0.673936182029218	0.691627006807485	-4.60683
ZFP36	0.248062231319798	9.39419482375133e-16	0.420765714392231	0.673936182029218	0.691627006807485	-4.60683
ARHGEF1	0.248062231319798	9.39419482375133e-16	0.420765714392231	0.673936182029218	0.691627006807485	-4.60683
POU2F2	0.248062231319798	9.39419482375133e-16	0.420765714392231	0.673936182029218	0.691627006807485	-4.60683
SNRNP70	0.248062231319798	9.39419482375133e-16	0.420765714392231	0.673936182029218	0.691627006807485	-4.60683
CD37	0.248062231319798	9.39419482375133e-16	0.420765714392231	0.673936182029218	0.691627006807485	-4.60683
LENG8	0.248062231319798	9.39419482375133e-16	0.420765714392231	0.673936182029218	0.691627006807485	-4.60683
KDM5D	0.248062231319798	9.39419482375133e-16	0.420765714392231	0.673936182029218	0.691627006807485	-4.60683
MICAL3	0.248062231319798	9.39419482375133e-16	0.420765714392231	0.673936182029218	0.691627006807485	-4.60683
PI4KA	0.248062231319798	9.39419482375133e-16	0.420765714392231	0.673936182029218	0.691627006807485	-4.60683
IGLC1	0.248062231319798	9.39419482375133e-16	0.420765714392231	0.673936182029218	0.691627006807485	-4.60683
DERL3	0.248062231319798	9.39419482375133e-16	0.420765714392231	0.673936182029218	0.691627006807485	-4.60683
TPST2	0.248062231319798	9.39419482375133e-16	0.420765714392231	0.673936182029218	0.691627006807485	-4.60683
XBP1	0.248062231319798	9.39419482375133e-16	0.420765714392231	0.673936182029218	0.691627006807485	-4.60683
EWSR1	0.248062231319798	9.39419482375133e-16	0.420765714392231	0.673936182029218	0.691627006807485	-4.60683
DDX17	0.248062231319798	9.39419482375133e-16	0.420765714392231	0.673936182029218	0.691627006807485	-4.60683
TNRC6B	0.248062231319798	9.39419482375133e-16	0.420765714392231	0.673936182029218	0.691627006807485	-4.60683
EP300	0.248062231319798	9.39419482375133e-16	0.420765714392231	0.673936182029218	0.691627006807485	-4.60683
SREBF2	0.248062231319798	9.39419482375133e-16	0.420765714392231	0.673936182029218	0.691627006807485	-4.60683
TBC1D22A	0.248062231319798	9.39419482375133e-16	0.420765714392231	0.673936182029218	0.691627006807485	-4.60683
TRABD	0.248062231319798	9.39419482375133e-16	0.420765714392231	0.673936182029218	0.691627006807485	-4.60683
BACH1	0.248062231319798	9.39419482375133e-16	0.420765714392231	0.673936182029218	0.691627006807485	-4.60683
IFNAR2	0.248062231319798	9.39419482375133e-16	0.420765714392231	0.673936182029218	0.691627006807485	-4.60683
SON	0.248062231319798	9.39419482375133e-16	0.420765714392231	0.673936182029218	0.691627006807485	-4.60683
TTC3	0.248062231319798	9.39419482375133e-16	0.420765714392231	0.673936182029218	0.691627006807485	-4.60683
DYRK1A	0.248062231319798	9.39419482375133e-16	0.420765714392231	0.673936182029218	0.691627006807485	-4.60683
BRWD1	0.248062231319798	9.39419482375133e-16	0.420765714392231	0.673936182029218	0.691627006807485	-4.60683
PDXK	0.248062231319798	9.39419482375133e-16	0.420765714392231	0.673936182029218	0.691627006807485	-4.60683
TRAPPC10	0.248062231319798	9.39419482375133e-16	0.420765714392231	0.673936182029218	0.691627006807485	-4.60683
MT.ND4L	0.248062231319798	9.39419482375133e-16	0.420765714392231	0.673936182029218	0.691627006807485	-4.60683
MT.ND5	0.248062231319798	9.39419482375133e-16	0.420765714392231	0.673936182029218	0.691627006807485	-4.60683
HSPA8	0.244725706913811	1.02482125350014e-16	0.415106267293804	0.678073972708083	0.694138069318374	-4.60689
IGHM	0.244725706913811	1.02482125350014e-16	0.415106267293804	0.678073972708083	0.694138069318374	-4.60689
MT.CO1	-0.166456	-9.8212e-17	-0.282345	0.77768568483823	0.795118240662748	-4.60819
MT.CO2	-0.151725	7.57940718734482e-16	-0.257358	0.796908259668017	0.813758309934629	-4.60838
MT.CO3	0.126744711190109	-1.58847e-15	0.214985685912787	0.829783333005798	0.846275920991006	-4.60866
HNRNPA2B1	-0.106205	-3.07446e-16	-0.180147	0.857041466283208	0.872905125688721	-4.60885
SERP1	-0.105311	-9.565e-16	-0.178629	0.858232853795354	0.872905125688721	-4.60886
MACF1	-0.103077	-1.70804e-17	-0.174839	0.861209685515059	0.872905125688721	-4.60887
SF3B1	-0.103077	-1.70804e-17	-0.174839	0.861209685515059	0.872905125688721	-4.60887
TTC17	-0.103077	-1.70804e-17	-0.174839	0.861209685515059	0.872905125688721	-4.60887
ZC3HAV1	-0.0869392	2.39124959150034e-16	-0.147467	0.882766550560304	0.892550908879322	-4.609
CLTC	-0.0869392	2.39124959150034e-16	-0.147467	0.882766550560304	0.892550908879322	-4.609
S100A6	0.075798280197325	-3.15987e-16	0.128569824383356	0.897700907657026	0.90113072176195	-4.60907
SPEN	-0.0742898	-2.64745e-16	-0.126011	0.899725885059558	0.90113072176195	-4.60908
H3F3A	-0.0742898	-2.64745e-16	-0.126011	0.899725885059558	0.90113072176195	-4.60908
GAK	-0.0742898	-2.64745e-16	-0.126011	0.899725885059558	0.90113072176195	-4.60908
PPP3CA	-0.0742898	-2.64745e-16	-0.126011	0.899725885059558	0.90113072176195	-4.60908
BRAF	-0.0742898	-2.64745e-16	-0.126011	0.899725885059558	0.90113072176195	-4.60908
CNOT6L	-0.074061	-1.28103e-16	-0.125623	0.900033120395614	0.90113072176195	-4.60908
STX16	-0.074061	-1.28103e-16	-0.125623	0.900033120395614	0.90113072176195	-4.60908
CD55	0.0663949281564428	-6.91754e-16	0.112619761699035	0.910334520219595	0.910334520219595	-4.60913

## Sheet: Table S15(DC_DEG)
Table S15: The Differential Genes of DC Cells in the Training Set
gene	diff_IPF_minus_control	AveExpr	t	pvalue	fdr	B
condition	1	0.384615384615385	6.87288055817895	1.21859097235486e-05	0.000767712312583561	3.52744178040144
FOS	1.28585373265882	4.61169564075065e-16	2.90092840333671	0.012542691921435	0.205649906035118	-3.44527
FTH1	-1.2608	-5.63652e-16	-2.80904	0.0149440468812917	0.205649906035118	-3.61525
FTL	-1.24313	-1.50307e-15	-2.74623	0.0168405662495627	0.205649906035118	-3.73074
TMSB4X	-1.23587	1.17854444152517e-15	-2.72089	0.0176707665644004	0.205649906035118	-3.77714
ADIPOR1	1.21977936827187	1.52442161458146e-15	2.66562124640809	0.0196231463858521	0.205649906035118	-3.87798
VIM	1.19568318750889	1.29810692110018e-15	2.58507849998456	0.0228499895594575	0.205649906035118	-4.02388
MT.ND3	1.0805551825293	6.83214169000096e-17	2.23193525941894	0.0441218150587212	0.316452628032804	-4.64512
YBX1	-1.06061	1.81905772496276e-15	-2.17533	0.0489369848937309	0.316452628032804	-4.74127
CSTB	-1.0555	-1.70804e-17	-2.16101	0.0502305758782229	0.316452628032804	-4.7654
IER2	0.978102165041635	-3.24527e-16	1.9529117106691	0.0730194246201565	0.415242637456755	-5.10747
S100A10	0.957900374697591	6.38378239159465e-16	1.90104652725361	0.0800197787022101	0.415242637456755	-5.1899
GPX4	-0.931153	-4.9533e-16	-1.83378	0.0900062162977027	0.415242637456755	-5.29497
ARPC4	0.92536891497811	9.82120367937639e-17	1.81943518385132	0.0922761416570567	0.415242637456755	-5.31709
S100A11	0.896388027449297	4.69709741187566e-16	1.7485843616104	0.104258152879071	0.437884242092098	-5.42485
ASAH1	-0.858083	-1.46891e-15	-1.65741	0.121700624550946	0.464098886354299	-5.55962
CCL18	0.850792840144755	-1.04724e-15	1.64035439836314	0.125233032825763	0.464098886354299	-5.58432
CEBPD	0.832416067970357	-1.02482e-16	1.59777149885429	0.134447122079686	0.470564927278902	-5.64526
CYBA	0.784256705257199	-4.27009e-16	1.48876300021855	0.160741546723093	0.518080616631677	-5.79632
MAP3K8	-0.777864	1.28102656687518e-15	-1.47456	0.164470037025929	0.518080616631677	-5.81546
ARRB2	0.761346550381366	1.19562479575017e-16	1.43813030200826	0.174367111680078	0.523101335040234	-5.86394
MYL6	-0.701948	-8.36937e-16	-1.31017	0.213135994020605	0.587397397976119	-6.02718
PGK1	0.700065443474149	-8.64693e-16	1.30619008297324	0.214446669102393	0.587397397976119	-6.03208
MT.CYB	0.683135696834591	-7.68616e-16	1.27056754794574	0.226464585673878	0.589565972915657	-6.07537
UBB	0.672652653386738	-1.02909e-15	1.24867710107456	0.234112997265668	0.589565972915657	-6.10152
ACSL1	-0.660321	1.14438373307516e-15	-1.22309	0.243312941203287	0.589565972915657	-6.13163
PPP1R15A	0.615390180327657	-8.79638e-16	1.13121530570264	0.278689958691944	0.627895941389989	-6.23564
BNIP3L	-0.605374	2.39124959150034e-16	-1.11101	0.286972505785248	0.627895941389989	-6.25762
H3F3A	0.602911228146252	-1.23833e-15	1.10606171121893	0.289031465084281	0.627895941389989	-6.26296
THBD	-0.571323	3.41607084500048e-17	-1.04304	0.31620554997244	0.664031654942124	-6.32918
HBEGF	0.541211382760111	-1.07233e-15	0.98379386220934	0.343426829703482	0.69793194423611	-6.38844
CD74	0.43917237108156	1.60555329715023e-15	0.788210501744926	0.444909676696818	0.800849166105284	-6.56244
MT.CO1	-0.425032	6.86416735417284e-16	-0.761662	0.460049575935957	0.800849166105284	-6.5834
INHBA	-0.417963	-4.7825e-16	-0.748437	0.46771117722778	0.800849166105284	-6.5936
CTSL	0.375329969456876	-7.40327e-16	0.669268875402794	0.515200989182527	0.800849166105284	-6.65118
C15ORF48	-0.370317	-9.22339e-16	-0.660025	0.520924724425595	0.800849166105284	-6.65752
C1QA	-0.36758	-6.66134e-16	-0.654982	0.524062102971554	0.800849166105284	-6.66094
MT.ND1	0.362123458902103	-4.27009e-17	0.644940960200448	0.530342304722232	0.800849166105284	-6.66768
S100A6	-0.361936	-1.28103e-16	-0.644597	0.530558078689042	0.800849166105284	-6.66791
LCP1	-0.348012	-1.05898e-15	-0.619041	0.546736932748656	0.800849166105284	-6.68461
PPP4C	-0.346535	1.51161134891271e-15	-0.616336	0.548464908722632	0.800849166105284	-6.68634
CD68	0.34393239832357	-1.09314e-15	0.611571389643395	0.55151678874032	0.800849166105284	-6.68937
MT.CO2	-0.331789	-1.25114e-15	-0.589383	0.565850698726002	0.800849166105284	-6.7032
GABARAPL1	0.327973037916776	-1.70804e-17	0.582422923083374	0.570387589359352	0.800849166105284	-6.70743
MT.ND2	0.319846164900049	-9.99201e-16	0.567623442223824	0.580099377695264	0.800849166105284	-6.71628
CPVL	0.311773652959183	3.24526730275046e-16	0.552951009697012	0.589812862410139	0.800849166105284	-6.72484
DUSP1	0.305457110866952	-2.90366e-16	0.541489177342169	0.597458901697593	0.800849166105284	-6.73138
HNRNPDL	0.287464550543832	5.97812397875084e-16	0.50892819784419	0.619451301260815	0.812663029752071	-6.74924
B4GALT1	0.271524033959671	5.60449123007892e-17	0.480184097938821	0.639189065074625	0.812663029752071	-6.76412
B2M	-0.266889	6.14892752100087e-16	-0.471844	0.644970658533389	0.812663029752071	-6.76828
UBA52	0.242146520871249	7.088347003376e-16	0.427444268992711	0.676150408352366	0.835244622082334	-6.78925
TMSB10	0.230695104696094	1.33653771810644e-15	0.406962073564407	0.690751155123732	0.836871591784522	-6.79824
PCOLCE2	-0.206479	-1.02482e-16	-0.363776	0.721956160187075	0.858174303618598	-6.81579
RASGEF1B	0.194355179526574	9.13798951037629e-16	0.342214742161747	0.737736539794278	0.859158752479527	-6.82383
MT.CO3	0.184939688694497	1.84254321202213e-15	0.325495650585419	0.750059228355143	0.859158752479527	-6.82974
ACP5	-0.148596	-8.02777e-16	-0.261147	0.798128557739553	0.897894627456998	-6.84974
SH3BGRL3	-0.135241	-1.53723e-15	-0.23757	0.815970645054008	0.901862291901798	-6.85598
KLF6	0.101563358533121	7.17374877450101e-16	0.178238664777658	0.861322245754432	0.935574163491883	-6.8691
SAT1	-0.0706252	4.42487926641469e-16	-0.123865	0.903344226599195	0.954359034222172	-6.87785
MT.ND4	0.0665398212063842	1.84040816774401e-15	0.116691564189699	0.908913365925878	0.954359034222172	-6.87877
MT.ATP6	-0.0325618	-6.31973e-16	-0.0570809	0.955361144410714	0.986684460620901	-6.88429
MAP1LC3B	0.00568757127032052	2.23752640347532e-15	0.0099690955430088	0.992199465621205	0.999153415217447	-6.88597
ZEB2	-0.000617258	1.4518301091252e-16	-0.00108192	0.999153415217447	0.999153415217447	-6.88603

## Sheet: Table S15(EN_DEG)
Table S15: The Differential Genes of Endothelial Cells in the Training Set
gene	diff_IPF_minus_control	AveExpr	t	pvalue	fdr	B
GDPD3	1.94076389185146	-8.54018e-17	3.48115969234963	0.000499417004926806	0.42020368735964	-4.23894
SLC25A23	1.81656289628701	-2.56205e-16	3.25837963068217	0.0011208012174343	0.42020368735964	-4.28718
MAN1C1	1.76832942447204	-7.51536e-16	3.17186296649168	0.00151500840235106	0.42020368735964	-4.30506
PC	1.76198088466836	-2.04964e-16	3.16047555302905	0.00157549158746841	0.42020368735964	-4.30737
THBS2	1.75771153253744	1.87883896475026e-16	3.15281759081478	0.00161740805401129	0.42020368735964	-4.30893
MDK	1.74089796197363	3.24526730275046e-16	3.12265898966966	0.0017926591903498	0.42020368735964	-4.31501
SAMD3	-1.73674	-3.84308e-16	-3.1152	0.00183863302560543	0.42020368735964	-4.31651
AQP5	1.72566916238789	1.02482125350014e-16	3.09534300161808	0.00196628582122858	0.42020368735964	-4.32047
RAI1	1.72488066358496	6.83214169000096e-17	3.0939286666432	0.0019756827309024	0.42020368735964	-4.32075
NTRK3	1.72223192301251	2.56205313375036e-16	3.08917760498391	0.00200755165279869	0.42020368735964	-4.32169
SFRP2	1.71504573132678	-1.36643e-16	3.07628769037714	0.00209640502098084	0.42020368735964	-4.32425
BNC2	1.70940690767503	-2.90366e-16	3.0661732989815	0.00216863593890922	0.42020368735964	-4.32624
NR2F2	1.70717190911451	6.14892752100087e-16	3.06216436882053	0.00219789135075103	0.42020368735964	-4.32703
ARL6	1.69810382073212	-9.565e-16	3.04589888495823	0.00232033859848064	0.42020368735964	-4.33022
TATDN3	-1.69582	-9.39419e-17	-3.04181	0.00235209062010894	0.42020368735964	-4.33102
PAPPA	1.68311246153577	-1.19562e-16	3.01900879514001	0.002536539922658	0.42020368735964	-4.33546
CHPF	1.68241608879407	4.61169564075065e-16	3.01775970722703	0.00254701693055034	0.42020368735964	-4.33571
NYNRIN	1.68046820490513	-2.73286e-16	3.01426577635371	0.0025765336064213	0.42020368735964	-4.33638
DGKA	1.67722826343033	-2.30585e-16	3.00845427413285	0.0026263226632596	0.42020368735964	-4.33751
ACTG1	1.67307995778795	-2.32293e-15	3.00101343372232	0.00269135454565507	0.42020368735964	-4.33895
VSTM2L	1.67110727892901	3.41607084500048e-17	2.9974750279644	0.00272279308513568	0.42020368735964	-4.33963
OSBPL10	1.66943624281614	5.12410626750072e-16	2.99447768058742	0.00274968645923917	0.42020368735964	-4.3402
NDFIP2	1.65833582554297	-3.58687e-16	2.97456679635164	0.00293458271517562	0.42020368735964	-4.34402
NUDT12	1.65809002716042	-7.68616e-16	2.97412590633644	0.00293880237486336	0.42020368735964	-4.34411
MUC5B	1.6568154859266	4.2700885562506e-16	2.97183975417335	0.00296077155319952	0.42020368735964	-4.34454
TDRD3	1.63955802163522	-8.41207e-16	2.94088493821889	0.00327335686791749	0.42020368735964	-4.35043
UBE2D2	-1.63955	1.53723188025022e-16	-2.94087	0.0032735614821644	0.42020368735964	-4.35043
LRP5	1.63853072826662	-1.36643e-16	2.93904227601666	0.00329287991265141	0.42020368735964	-4.35077
HMGB3	1.63681960480564	6.83214169000096e-16	2.93597302372584	0.00332563430387311	0.42020368735964	-4.35135
CPA3	1.63339746940736	9.13798951037629e-16	2.92983471918489	0.00339203269233814	0.42020368735964	-4.35251
AGAP1	1.63307154207907	8.54017711250121e-16	2.92925010140493	0.00339841907474874	0.42020368735964	-4.35262
IRS1	1.63300359785737	0	2.92912822945189	0.00339975178580416	0.42020368735964	-4.35264
NDUFV2	-1.62941	-2.42541e-15	-2.92268	0.00347092889874908	0.42020368735964	-4.35386
PDE4C	1.62240438243314	6.83214169000096e-17	2.91011635394231	0.00361357561602077	0.42020368735964	-4.35621
COL1A1	1.62182868796967	-1.36643e-16	2.90908372737204	0.00362553230084103	0.42020368735964	-4.3564
BDH2	1.61893373235693	3.07446376050043e-16	2.90389102833609	0.00368620523853742	0.42020368735964	-4.35737
ZNF337	1.61878608542748	5.80732043650082e-16	2.9036261931639	0.00368932424686071	0.42020368735964	-4.35742
GDF15	1.61748564716086	4.2700885562506e-16	2.90129358933963	0.0037168995255678	0.42020368735964	-4.35786
SERP1	-1.61172	2.57059331086286e-15	-2.89095	0.00384141030533815	0.42020368735964	-4.35978
HAPLN3	1.60998409300802	-2.90366e-16	2.88783800720699	0.00387965717994425	0.42020368735964	-4.36036
PLA2G10	1.60383398344248	-5.12411e-16	2.87680651923826	0.00401789369352164	0.42020368735964	-4.3624
SFRP4	1.60092704768859	1.36642833800019e-16	2.87159233135216	0.00408477671696276	0.42020368735964	-4.36337
P2RX4	-1.60069	9.73580190825137e-16	-2.87116	0.00409032063504601	0.42020368735964	-4.36345
MAGEF1	1.59637540491237	-8.54018e-17	2.86342802273478	0.00419153299474866	0.42020368735964	-4.36487
TCF7L1	1.59179235681318	-8.88178e-16	2.85520738220349	0.00430157716031072	0.42020368735964	-4.36638
TRIB2	1.59071004521839	1.53723188025022e-16	2.85326603348294	0.0043279441271673	0.42020368735964	-4.36674
DNM1	1.58926512194397	-7.00295e-16	2.85067426604406	0.00436337332601853	0.42020368735964	-4.36721
TMEM54	1.58924930354025	2.47665136262535e-16	2.85064589247958	0.00436376264046156	0.42020368735964	-4.36722
PTPRU	1.58773612319959	4.09928501400058e-16	2.84793169193655	0.00440115016265212	0.42020368735964	-4.36772
CXCL10	1.58594080433173	1.02482125350014e-16	2.84471141784554	0.00444588517922667	0.42020368735964	-4.3683
MAP7	1.58156084899949	7.00294523225099e-16	2.83685506601371	0.0045567570424697	0.42020368735964	-4.36974
ASPN	1.58131835929396	1.53723188025022e-16	2.83642011079208	0.00456296784504327	0.42020368735964	-4.36982
DMWD	1.58033775050527	-1.19562e-16	2.83466118699745	0.00458816210416778	0.42020368735964	-4.37014
PLTP	1.5801045270549	-9.90661e-16	2.83424285271261	0.00459417270552657	0.42020368735964	-4.37022
UBXN2B	-1.57993	6.14892752100087e-16	-2.83394	0.00459855552951153	0.42020368735964	-4.37027
ANKRD26	1.57458933125047	-9.13799e-16	2.82435021331923	0.0047384039123188	0.42020368735964	-4.37201
CREBRF	1.57218368189144	5.29490980975075e-16	2.82003518580983	0.00480258956298342	0.42020368735964	-4.3728
VCAM1	1.5719463835148	5.29490980975075e-16	2.81960954230559	0.00480896341412952	0.42020368735964	-4.37287
ZNF266	1.5671879043206	-2.13504e-16	2.81107422997971	0.004938402879953	0.42020368735964	-4.37442
PHF20	-1.56645	-4.6117e-16	-2.80976	0.00495864200609247	0.42020368735964	-4.37466
CHI3L1	1.56611908913772	3.28796818831296e-16	2.80915708985317	0.00496790656341359	0.42020368735964	-4.37476
STEAP3	1.56548839840717	-5.12411e-17	2.80802581615278	0.00498539090719581	0.42020368735964	-4.37497
SPRY1	1.56496499135374	1.09314267040015e-15	2.80708697781972	0.00499994330720807	0.42020368735964	-4.37514
RBP1	1.5645869469027	-8.54018e-16	2.80640887724788	0.00501047803805861	0.42020368735964	-4.37526
GAS6	1.56377009633586	2.73285667600039e-16	2.80494368754607	0.00503330927113186	0.42020368735964	-4.37552
CFH	1.56090552884788	-1.70804e-17	2.79980549586957	0.00511412005282589	0.42020368735964	-4.37645
MYH14	1.56012124664549	-9.05259e-16	2.79839872423606	0.00513644856732561	0.42020368735964	-4.3767
ASAP2	1.5600701515706	5.6365168942508e-16	2.79830707469749	0.00513790629655552	0.42020368735964	-4.37672
OGN	1.55822286007524	-5.46571e-16	2.79499357699657	0.00519086081448125	0.42020368735964	-4.37731
CCDC3	1.55436297100952	-9.05259e-16	2.78807007110853	0.00530310340974168	0.42020368735964	-4.37856
IGFBP7	1.55248337664141	-8.19857e-16	2.78469863155335	0.00535855026814188	0.42020368735964	-4.37916
THY1	1.55048100732557	-1.11876e-15	2.78110696984697	0.00541819435301484	0.42020368735964	-4.3798
COL1A2	1.54830553937029	-2.04964e-16	2.77720482008537	0.00548367325430286	0.42020368735964	-4.3805
CNTN3	1.54681265639589	-2.04964e-16	2.77452702704847	0.00552901955013604	0.42020368735964	-4.38098
ZBTB16	1.54550507041888	-1.19562e-16	2.77218160233372	0.00556901516930042	0.42020368735964	-4.3814
SLC44A5	1.54489446531049	3.07446376050043e-16	2.7710863563328	0.00558778124188113	0.42020368735964	-4.38159
COL13A1	1.54489446531049	3.07446376050043e-16	2.7710863563328	0.00558778124188113	0.42020368735964	-4.38159
ZNF248	1.54333596648236	6.14892752100087e-16	2.76829086775027	0.00563593840992176	0.42020368735964	-4.38209
NAV2	1.54218276298486	-3.92848e-16	2.76622235980377	0.00567181274810398	0.42020368735964	-4.38246
DMPK	1.54123506519647	8.71098065475123e-16	2.76452246866536	0.0057014481754798	0.42020368735964	-4.38276
NFIA	1.53870110388621	-4.27009e-16	2.75997728724877	0.00578137475819631	0.42020368735964	-4.38356
OAF	1.53859631581349	-7.17375e-16	2.75978932826184	0.00578470164701066	0.42020368735964	-4.3836
SKAP1	-1.53808	8.54017711250121e-17	-2.75887	0.00580103332928064	0.42020368735964	-4.38376
SEL1L3	1.53692319355499	-2.90366e-16	2.75678823895308	0.00583805549302578	0.42020368735964	-4.38413
EGLN3	1.53660265646906	-1.36643e-16	2.75621328968278	0.00584832752540869	0.42020368735964	-4.38423
C16ORF74	1.53633196152737	-1.70804e-17	2.75572774256194	0.00585701498720803	0.42020368735964	-4.38432
FAM160B2	1.5360378205931	3.24526730275046e-16	2.75520014022527	0.0058664680920215	0.42020368735964	-4.38441
UPP1	-1.53575	-4.9533e-16	-2.75468	0.00587573049472047	0.42020368735964	-4.3845
SYT17	1.52986686467897	-9.13799e-16	2.74413126003755	0.00606798753442843	0.42020368735964	-4.38637
PEAK1	1.52909454876466	-1.72512e-15	2.74274595240589	0.00609364256546057	0.42020368735964	-4.38661
POLD1	1.52817770352409	-2.00694e-16	2.74110140166534	0.00612422542383028	0.42020368735964	-4.3869
CACHD1	1.52813802809866	-3.41607e-17	2.74103023561965	0.00612555197693268	0.42020368735964	-4.38691
TNFRSF19	1.52707962561615	3.41607084500048e-16	2.73913177281546	0.0061610354729374	0.42020368735964	-4.38725
OSBPL5	1.52447134469733	8.62557888362622e-16	2.73445328387661	0.00624927086201851	0.42020368735964	-4.38807
SLC44A4	1.52231632901356	1.87883896475026e-16	2.7305878194756	0.00632302924544991	0.42020368735964	-4.38875
NUCKS1	1.52129696433988	-6.49053e-16	2.72875937902042	0.00635819061423862	0.42020368735964	-4.38907
FDXR	1.52085153680058	-2.56205e-17	2.72796041300391	0.00637361009893353	0.42020368735964	-4.38921
PCDH7	1.52007471014592	-8.54018e-17	2.72656701443055	0.00640058225214487	0.42020368735964	-4.38945
FAT4	1.51964915130178	-3.24527e-16	2.72580368701026	0.00641540155914636	0.42020368735964	-4.38959
OLFML3	1.51953260040064	-1.79344e-16	2.72559462896829	0.0064194656125201	0.42020368735964	-4.38963
HM13	1.51910480645544	-2.73286e-16	2.72482729243399	0.00643440236861369	0.42020368735964	-4.38976
COL15A1	1.51754421847953	6.49053460550092e-16	2.72202805653471	0.00648915696136625	0.42020368735964	-4.39025
XRCC3	1.51594522080384	7.94236471462612e-16	2.71915992492934	0.00654569358291942	0.42020368735964	-4.39075
PXMP4	1.51572597081521	7.17374877450101e-16	2.71876665492562	0.00655348016249196	0.42020368735964	-4.39082
ZNF692	1.51491757474127	-3.41607e-16	2.71731663009783	0.00658226207424121	0.42020368735964	-4.39107
DCLK1	1.51458696931227	2.17774516368781e-16	2.71672362118092	0.00659406557309046	0.42020368735964	-4.39118
NINJ1	-1.51289	8.36937357025118e-16	-2.71368	0.00665503607133409	0.42020368735964	-4.39171
EPPK1	1.5123595673572	-1.36643e-16	2.71272831709616	0.00667408712525734	0.42020368735964	-4.39187
PGS1	-1.51182	4.09928501400058e-16	-2.71177	0.00669350526330855	0.42020368735964	-4.39204
DGKH	1.5117759680671	-1.70804e-16	2.71168151159153	0.00669519731734048	0.42020368735964	-4.39206
PROM2	1.51070202750173	2.8182584471254e-16	2.70975517803605	0.00673420125312663	0.42020368735964	-4.39239
KCTD1	1.51036626245511	-1.70804e-16	2.70915291428243	0.00674643758530851	0.42020368735964	-4.3925
MMP16	1.50992153914559	2.73285667600039e-16	2.70835521144704	0.00676267546135822	0.42020368735964	-4.39264
SERPINF1	1.50530075995376	3.41607084500048e-16	2.70006689243132	0.00693348100122019	0.42020368735964	-4.39408
PPARGC1A	1.50451366372851	2.73285667600039e-16	2.69865507326835	0.00696295897243156	0.42020368735964	-4.39432
CDON	1.50451366372851	2.73285667600039e-16	2.69865507326835	0.00696295897243156	0.42020368735964	-4.39432
FGD3	-1.50349	-5.46571e-16	-2.69681	0.00700159322149261	0.42020368735964	-4.39464
TBC1D1	1.50303796944433	-6.40513e-18	2.69600811168694	0.00701852953605902	0.42020368735964	-4.39478
DLL1	1.50277881670005	-8.02777e-16	2.69554326787398	0.0070283295224325	0.42020368735964	-4.39486
MOXD1	1.50241882744276	-3.33067e-16	2.69489755301013	0.0070419630808414	0.42020368735964	-4.39497
SDC1	1.50151294930018	1.70803542250024e-16	2.69327267401823	0.00707637574180968	0.42020368735964	-4.39525
MGP	1.49950855410607	1.53723188025022e-16	2.68968	0.00715305629349586	0.42020368735964	-4.39587
CD24	1.49881862667442	1.87883896475026e-16	2.68843985155984	0.00717962235163903	0.42020368735964	-4.39609
PTPRF	1.49774038293406	7.34455231675104e-16	2.68650579937388	0.00722131814252375	0.42020368735964	-4.39642
GNL3L	1.49755750502717	6.31973106325089e-16	2.68617777018869	0.00722841156554431	0.42020368735964	-4.39648
ZNF765	1.49663241538234	7.25915054562602e-16	2.68451843141136	0.00726438962686232	0.42020368735964	-4.39677
EFHC2	1.49639469729341	-9.22339e-16	2.6840920350667	0.00727366073845156	0.42020368735964	-4.39684
EPS8L1	1.49610640143207	3.92848147175055e-16	2.68357491707199	0.00728491865136351	0.42020368735964	-4.39693
ALDH18A1	1.49568435138208	4.9533027252507e-16	2.68281788339657	0.00730142784652531	0.42020368735964	-4.39706
PDLIM4	1.49436126041485	-5.80732e-16	2.68044464728898	0.00735340056607105	0.42020368735964	-4.39747
C1QTNF1	1.49385107307508	-4.44089e-16	2.67952952123465	0.00737352988307215	0.42020368735964	-4.39763
MON1A	1.49251620594545	-3.07446e-16	2.67713516215478	0.00742643080236774	0.42020368735964	-4.39804
MMP14	1.49149295139333	-7.89966e-17	2.6752997444016	0.0074672127079946	0.42020368735964	-4.39835
EYA2	1.48883533397422	-4.7825e-16	2.67053276028986	0.00757407211590605	0.42020368735964	-4.39917
NQO2	-1.48866	-7.17375e-16	-2.67022	0.00758103405478947	0.42020368735964	-4.39923
ERLIN1	1.48740229503409	-1.19562e-16	2.66796230985181	0.00763225994255141	0.42020368735964	-4.39961
APP	1.4873848952845	4.9533027252507e-16	2.66793109981788	0.00763296890616047	0.42020368735964	-4.39962
ITGA9	1.48730065929836	1.62263365137523e-16	2.66778000523041	0.0076364019885118	0.42020368735964	-4.39964
CHI3L2	-1.48728	-6.83214e-17	-2.66773	0.00763743559050627	0.42020368735964	-4.39965
LUM	1.48688108241655	-1.45183e-16	2.66702740769141	0.00765352269266886	0.42020368735964	-4.39977
HDAC11	1.48502499661207	-4.09929e-16	2.66369813558611	0.00772967315792291	0.42020368735964	-4.40034
CBWD2	-1.48309	2.94636110381292e-16	-2.66023	0.00780963144840331	0.42020368735964	-4.40094
POSTN	1.48286617958567	-9.565e-16	2.65982585269431	0.00781909751868081	0.42020368735964	-4.40101
SLC25A44	1.48228226673189	-2.22045e-16	2.65877848474865	0.00784344357338631	0.42020368735964	-4.40119
BCAS2	-1.48223	1.70803542250024e-17	-2.65869	0.00784541761100995	0.42020368735964	-4.4012
COL27A1	1.48196697895885	1.02482125350014e-16	2.65821295120198	0.00785661760804618	0.42020368735964	-4.40128
YPEL2	1.4818981617983	5.29490980975075e-16	2.65808951345335	0.00785949570935119	0.42020368735964	-4.4013
PABPC1L	1.48168322271278	-4.7825e-16	2.65770397594207	0.00786849106825888	0.42020368735964	-4.40137
GMPPB	1.48167159213509	-3.24527e-16	2.65768311410597	0.00786897807940901	0.42020368735964	-4.40137
IGFBP4	1.48111706266375	-4.7825e-16	2.65668845130748	0.00789222943858122	0.42020368735964	-4.40154
LOX	1.48061363685268	6.14892752100087e-16	2.65578545344723	0.00791339130043042	0.42020368735964	-4.4017
ZSCAN16	-1.47901	-3.92848e-16	-2.65292	0.00798095472732546	0.42020368735964	-4.40219
WEE1	1.47883902303581	-6.66134e-16	2.65260231812886	0.00798839438307065	0.42020368735964	-4.40224
ACAT1	-1.47881	1.11022302462516e-15	-2.65256	0.00798945895107225	0.42020368735964	-4.40225
NPHP3	1.47750417157689	3.20256641718795e-16	2.65020798715765	0.00804522998281375	0.42020368735964	-4.40265
ACAA2	-1.47725	1.02482125350014e-16	-2.64976	0.00805592471848656	0.42020368735964	-4.40272
CROCC	1.47507091186548	-2.90366e-16	2.6458434347956	0.00814976604778019	0.42020368735964	-4.40339
COL5A1	1.47358737552179	-3.92848e-16	2.64318240686558	0.00821409574176925	0.42020368735964	-4.40384
CYB5R4	-1.4727	-4.09929e-16	-2.64159	0.00825279621964845	0.42020368735964	-4.40411
TBCEL	1.47179531322126	3.84307970062554e-16	2.63996797409868	0.00829240961248852	0.42020368735964	-4.40439
LTBP1	1.47070554308923	5.20950803862574e-16	2.63801324695568	0.00834035902341364	0.42020368735964	-4.40472
MMP7	1.46860353485237	5.80732043650082e-16	2.63424286232626	0.00843354761427525	0.42020368735964	-4.40536
CXCL17	1.46824735215423	-5.12411e-17	2.63360397531015	0.00844943024650692	0.42020368735964	-4.40547
TNFRSF21	1.46772149242591	-4.7825e-16	2.6326607375996	0.00847292789166139	0.42020368735964	-4.40563
CISD1	1.46665797054021	-9.05259e-16	2.63075309209157	0.00852062924571641	0.42020368735964	-4.40595
LCK	-1.46643	-1.70804e-16	-2.63034	0.00853094271998145	0.42020368735964	-4.40602
SETD1A	1.4663243685772	-2.79691e-16	2.63015470827385	0.00853564144179577	0.42020368735964	-4.40605
ERV3.1	-1.46577	6.31973106325089e-16	-2.62917	0.00856043199260071	0.42020368735964	-4.40622
ETFA	-1.46481	4.09928501400058e-16	-2.62744	0.00860411651999046	0.42020368735964	-4.40651
RAB30	1.4633183235703	5.12410626750072e-16	2.62476274753335	0.00867198471862923	0.42020368735964	-4.40696
P4HA2	1.46160739020233	2.73285667600039e-16	2.6216938362135	0.00875045269297763	0.42020368735964	-4.40748
COL4A5	1.46132948404452	1.36642833800019e-16	2.62119535429157	0.00876325793632517	0.42020368735964	-4.40756
COL6A2	1.46038104662292	1.70803542250024e-16	2.6194941364687	0.00880708581623146	0.42020368735964	-4.40785
COQ10A	1.45879825322157	8.19857002800116e-16	2.61665507056623	0.00888066394594842	0.42020368735964	-4.40833
NLRC5	1.45876758379493	7.60075763012607e-16	2.61660005863394	0.00888209505948957	0.42020368735964	-4.40833
COX19	-1.4577	9.44223332000914e-16	-2.61468	0.00893213179613603	0.42020368735964	-4.40866
EPB41L4B	1.45733958456248	6.83214169000096e-17	2.61403864794943	0.00894895766473318	0.42020368735964	-4.40877
GHITM	-1.45663	-1.14438e-15	-2.61277	0.00898227064239059	0.42020368735964	-4.40898
TMEM218	1.45391475788251	9.73580190825137e-16	2.60789551604057	0.00911115221081887	0.42020368735964	-4.4098
CUL7	1.45387818773098	-1.96424e-16	2.60782991994309	0.00911289818697557	0.42020368735964	-4.40981
PLOD2	1.45273626299057	-1.07606e-15	2.60578164277002	0.009167567830054	0.42020368735964	-4.41015
ZNF350	-1.45017	3.41607084500048e-17	-2.60118	0.00929146168714862	0.42020368735964	-4.41092
RBM27	1.44932081642052	7.68615940125108e-17	2.5996553360199	0.00933283371120869	0.42020368735964	-4.41117
UBN1	-1.44902	3.80037881506304e-16	-2.59911	0.00934773662697202	0.42020368735964	-4.41127
NDEL1	-1.44863	5.95677353596959e-16	-2.59842	0.00936640576241138	0.42020368735964	-4.41138
TXNRD3	1.44831115731451	-2.56205e-17	2.59784430449895	0.00938219531243612	0.42020368735964	-4.41148
MFAP2	1.44740341311188	-3.67228e-16	2.59621607834406	0.0094267730447634	0.42020368735964	-4.41175
FOXC1	1.44639651171963	-3.75768e-16	2.59440999335063	0.00947644113965573	0.42020368735964	-4.41205
LAMTOR5	-1.44464	3.41607084500048e-15	-2.59125	0.00956388097783731	0.42020368735964	-4.41258
CD3D	-1.44256	-8.54018e-17	-2.58753	0.00966786032437568	0.42020368735964	-4.4132
TUFT1	1.44249400394893	-4.27009e-16	2.58741004203894	0.00967115524016034	0.42020368735964	-4.41322
TCAF1	1.44178905924358	6.14892752100087e-16	2.58614557854397	0.00970670604966919	0.42020368735964	-4.41343
FXYD3	1.43997320285902	3.92848147175055e-16	2.58288846618757	0.00979881789045599	0.42020368735964	-4.41397
CTSK	1.43912549254205	2.56205313375036e-16	2.5813679231691	0.00984208526457973	0.42020368735964	-4.41422
POLR1C	1.43885549080771	4.2700885562506e-16	2.5808836194584	0.00985590193072158	0.42020368735964	-4.4143
LCN6	1.43631324820185	1.87883896475026e-16	2.57632358383281	0.00998684471430795	0.42020368735964	-4.41506
KREMEN1	1.43515974172448	1.87883896475026e-16	2.57425453242953	0.0100467675340241	0.42020368735964	-4.4154
GBP1	1.43401202171745	4.9533027252507e-16	2.57219586025236	0.0101067073514054	0.42020368735964	-4.41574
SNED1	1.43285377934891	-5.12411e-17	2.57011831405303	0.0101675193217815	0.42020368735964	-4.41608
CCDC148	1.43179500287101	-3.75768e-16	2.56821918041108	0.0102233937562726	0.42020368735964	-4.41639
MITD1	-1.43137	3.71497704393802e-16	-2.56746	0.0102458880875004	0.42020368735964	-4.41652
NCOA7	1.43061740076743	-1.02482e-16	2.5661069085403	0.010285859865525	0.42020368735964	-4.41674
PRRG4	1.43060136019789	-4.6117e-16	2.56607813647567	0.0102867130804525	0.42020368735964	-4.41675
TNC	1.43051024748313	-9.39419e-17	2.56591470705934	0.0102915606577379	0.42020368735964	-4.41678
ERBB3	1.43040216097275	-8.19857e-16	2.56572083164522	0.0102973139485362	0.42020368735964	-4.41681
HELLS	1.42970350971083	-1.70804e-17	2.56446765673704	0.0103345712608369	0.42020368735964	-4.41701
PGF	1.4294271184126	-3.75768e-16	2.5639718920277	0.0103493435997217	0.42020368735964	-4.4171
PKD1	1.42908632511156	1.08460249328765e-15	2.56336060906435	0.0103675839125897	0.42020368735964	-4.4172
ANKRD37	1.42756244071874	-8.54018e-17	2.56062720859953	0.0104494973671638	0.42020368735964	-4.41765
GCLC	1.42721655710384	-2.04964e-16	2.56000679511003	0.0104681696591731	0.42020368735964	-4.41775
LYRM9	1.42634798764151	-5.97812e-16	2.55844883691894	0.0105151897205281	0.42020368735964	-4.418
MXRA8	1.42629540255121	3.58687438725051e-16	2.55835451473089	0.0105180424398812	0.42020368735964	-4.41802
OLFM1	1.42584071636547	1.19562479575017e-16	2.55753894142538	0.0105427377039783	0.42020368735964	-4.41815
SECTM1	1.42553382649257	-9.22339e-16	2.55698847124197	0.0105594348817809	0.42020368735964	-4.41824
DOC2B	1.42474275107061	4.9533027252507e-16	2.55556951457027	0.0106025840021623	0.42020368735964	-4.41848
WARS	1.42436604358353	1.70803542250024e-17	2.55489381211859	0.0106231865335274	0.42020368735964	-4.41859
ECM1	1.42319635453798	5.6365168942508e-16	2.55279573394688	0.0106873851587003	0.42020368735964	-4.41893
EIF1B	-1.42284	2.1350442781253e-15	-2.55216	0.0107068620524938	0.42020368735964	-4.41904
SH3PXD2A	1.42271587205666	-4.44089e-16	2.55193388967316	0.0107138563450245	0.42020368735964	-4.41907
NNMT	1.42087338170134	1.21270514997517e-15	2.54862900380558	0.0108159057330596	0.42020368735964	-4.41962
MED30	-1.4195	-1.11022e-16	-2.54617	0.0108925438173617	0.42020368735964	-4.42002
CCS	1.41918033899119	-1.70804e-17	2.54559218306467	0.0109104385368473	0.42020368735964	-4.42011
DNHD1	1.41890866977247	-3.58687e-16	2.54510488837733	0.0109256756463488	0.42020368735964	-4.42019
FTH1	-1.4181	3.41607084500048e-16	-2.54366	0.0109710332150252	0.42020368735964	-4.42043
PTGDS	1.41724406696206	2.39124959150034e-16	2.54211908045308	0.011019451826024	0.42020368735964	-4.42068
PAQR3	1.41534669939548	-8.79638e-16	2.53871576100652	0.011127212484483	0.42020368735964	-4.42124
ERGIC3	1.41525	8.54017711250121e-17	2.53853971974657	0.0111328119245875	0.42020368735964	-4.42127
STS	1.41463401532283	-4.6971e-16	2.53743741536256	0.0111679304573553	0.42020368735964	-4.42144
IFT43	1.41373038312528	3.41607084500048e-17	2.53581656493556	0.0112197481674444	0.42020368735964	-4.42171
ADAMTSL3	1.4136562302866	5.38031158087576e-16	2.53568355654944	0.0112240098382455	0.42020368735964	-4.42173
MMP2	1.41347196356363	-4.7825e-16	2.53535303623662	0.0112346061383517	0.42020368735964	-4.42178
PROSER2	1.41291152058005	-4.7825e-16	2.53434776633621	0.0112668891612527	0.42020368735964	-4.42195
SH3BGRL2	1.41217641765907	-1.70804e-16	2.53302920787116	0.0113093579375634	0.42020368735964	-4.42216
DDX58	1.41158831757742	6.66133814775094e-16	2.53197432927007	0.0113434362626105	0.42020368735964	-4.42233
TSPAN8	1.41121761323484	-1.02482e-16	2.53130939469426	0.0113649640887551	0.42020368735964	-4.42244
TMEM241	1.41106213459986	6.66133814775094e-16	2.53103051174544	0.0113740039542795	0.42020368735964	-4.42249
ADGRE5	-1.41102	6.66133814775094e-16	-2.53096	0.0113764092451586	0.42020368735964	-4.4225
TP53INP1	1.41078076521232	-3.58687e-16	2.53052581780782	0.0113903796116943	0.42020368735964	-4.42257
BPIFB1	1.41063164838425	-1.19562e-16	2.53025834606976	0.0113990666719158	0.42020368735964	-4.42261
GHDC	1.4099644676136	-1.60128e-16	2.52906161996822	0.011438006515903	0.42020368735964	-4.42281
POLL	1.40942647427741	1.53723188025022e-16	2.52809661813334	0.0114694923124722	0.42020368735964	-4.42297
FAM189B	1.40820202938487	2.39124959150034e-16	2.52590032407443	0.0115414392943617	0.42020368735964	-4.42332
TANC1	1.40601813407004	-7.68616e-17	2.52198305810807	0.0116707572111826	0.42020368735964	-4.42396
TAF1C	1.4059590432896	7.85696294350111e-16	2.52187706662508	0.0116742740232508	0.42020368735964	-4.42397
ITGB4	1.40553185285035	-6.83214e-17	2.52111081260298	0.0116997264163249	0.42020368735964	-4.4241
FKBP10	1.40518935178911	8.54017711250121e-17	2.52049646642001	0.0117201684825204	0.42020368735964	-4.4242
POLR2E	-1.40395	1.22978550420017e-15	-2.51828	0.0117942032035073	0.42020368735964	-4.42456
SCNN1G	1.40367277950582	-1.70804e-16	2.51777618172938	0.0118110658509463	0.42020368735964	-4.42464
DNAH12	1.40188190129628	1.02482125350014e-16	2.51456387287351	0.0119192086850738	0.42020368735964	-4.42516
VGLL4	1.40145026374509	2.64745490487537e-16	2.51378964204038	0.0119454042148044	0.42020368735964	-4.42528
SMYD4	1.4011318941685	2.26314693481282e-16	2.51321858064442	0.0119647583525261	0.42020368735964	-4.42538
MTMR4	1.40099131529818	2.47665136262535e-16	2.51296642349176	0.0119733131857683	0.42020368735964	-4.42542
WRAP53	1.40049551105023	-2.22045e-16	2.51207709647445	0.0120035283275259	0.42020368735964	-4.42556
PDLIM1	1.40042714238935	-2.56205e-16	2.51195446320232	0.0120077001270034	0.42020368735964	-4.42558
FAM49B	-1.39949	1.53723188025022e-16	-2.51027	0.0120650619805795	0.42020368735964	-4.42585
TMEM45A	1.39871260857152	-5.12411e-17	2.50887909373422	0.0121127407097496	0.42020368735964	-4.42608
GPR162	1.39765328092303	-3.07446e-16	2.50697897145433	0.0121780464933163	0.42020368735964	-4.42638
SND1	-1.39757	7.51535585900106e-16	-2.50683	0.0121832501723289	0.42020368735964	-4.42641
PRAF2	1.39731257656013	1.29810692110018e-15	2.50636784801984	0.0121991165605479	0.42020368735964	-4.42648
NPEPPS	1.3965627560819	5.61516645146954e-16	2.50502289058515	0.0122456012717082	0.42020368735964	-4.4267
COL6A3	1.39577928883365	2.73285667600039e-16	2.50361758073972	0.0122943394914422	0.42020368735964	-4.42692
POLG2	1.3950897234076	7.85696294350111e-16	2.50238070314914	0.0123373783406129	0.42020368735964	-4.42712
SLC44A3	1.39486317760319	6.14892752100087e-16	2.50197434659744	0.0123515471713046	0.42020368735964	-4.42719
IGHG1	1.39383415825926	-4.6544e-16	2.50012858850301	0.0124160866085155	0.42020368735964	-4.42748
ZNF385D	1.39355383952203	8.88178419700125e-16	2.4996257791231	0.0124337197060261	0.42020368735964	-4.42756
AGRN	1.3918140085005	6.83214169000096e-16	2.49650503391082	0.0125436584248055	0.42020368735964	-4.42807
RNF7	-1.39101	-1.16146e-15	-2.49505	0.0125950461806898	0.42020368735964	-4.4283
MFSD2A	1.39093001076656	5.46571335200077e-16	2.49491940193752	0.0125998467029606	0.42020368735964	-4.42832
ZNF687	1.39087000314902	-4.6117e-16	2.49481176591839	0.0126036689448735	0.42020368735964	-4.42834
NPDC1	1.3899365076308	-1.87884e-16	2.49313734947614	0.0126632611569785	0.42020368735964	-4.42861
PSD3	1.38955919712119	-8.36937e-16	2.4924605653794	0.0126874184859196	0.42020368735964	-4.42871
TSPYL4	1.38911386311505	-1.02482e-16	2.49166176713387	0.0127159835021513	0.42020368735964	-4.42884
DHRS3	1.38894971300558	3.75767792950053e-16	2.49136733010988	0.0127265269158829	0.42020368735964	-4.42889
SBNO2	1.38878259628507	-1.53723e-16	2.49106757185808	0.0127372688236555	0.42020368735964	-4.42894
ATP6V1G1	-1.3881	-3.07446e-16	-2.48984	0.0127812926240277	0.42020368735964	-4.42913
LYST	-1.38762	-8.54018e-17	-2.48897	0.0128124964899363	0.42020368735964	-4.42927
TKFC	1.38758207138314	-5.12411e-16	2.48891418322807	0.0128146721796161	0.42020368735964	-4.42928
FBLN1	1.3869274764816	-3.41607e-17	2.48774003247452	0.012857052031718	0.42020368735964	-4.42947
UBE2D1	-1.38599	1.65679435982523e-15	-2.48607	0.0129177148677523	0.42020368735964	-4.42974
CCDC61	1.38371295873112	1.53723188025022e-16	2.48197413293863	0.0130669715405195	0.42020368735964	-4.43039
TTC3	1.38249407983585	-6.49053e-16	2.47979	0.0131473578529819	0.42020368735964	-4.43074
A2M	1.38240025972186	-4.27009e-16	2.47961953694764	0.0131535634728549	0.42020368735964	-4.43077
CDH3	1.38106903432819	-5.12411e-16	2.47723171007115	0.0132418953154182	0.42020368735964	-4.43115
NFS1	1.38043751572319	-1.43902e-15	2.47609895140745	0.0132839820668289	0.42020368735964	-4.43133
IRX3	1.38039118903818	-1.19562e-16	2.47601585495805	0.0132870740999852	0.42020368735964	-4.43134
H2AFY2	1.37998456674338	-7.85696e-16	2.47528649413852	0.0133142410530773	0.42020368735964	-4.43146
TFEB	1.37979194469157	6.83214169000096e-16	2.47494098682285	0.0133271275078677	0.42020368735964	-4.43151
P3H4	1.37961943001488	2.26314693481282e-16	2.47463154622508	0.0133386781324739	0.42020368735964	-4.43156
METTL9	-1.37906	-1.19562e-16	-2.47362	0.0133763194050328	0.42020368735964	-4.43172
MFAP4	1.37856992714523	-1.36643e-16	2.47274904670921	0.0134091378658189	0.42020368735964	-4.43186
KRT17	1.37787274642677	-3.41607e-17	2.47149850952354	0.0134561256401056	0.42020368735964	-4.43206
EPHA4	1.37700026517885	-5.46571e-16	2.46993353473945	0.0135151330574018	0.42020368735964	-4.43231
APOL1	1.37628168048758	-3.07446e-16	2.46864460512092	0.013563903762481	0.42020368735964	-4.43251
FAM13A	1.37603350261873	9.56499836600135e-16	2.46819944700704	0.013580783807678	0.42020368735964	-4.43258
AFAP1L1	1.37598540233428	-3.58687e-16	2.46811316924181	0.013584057538822	0.42020368735964	-4.43259
OSMR	1.37556664338749	-1.53723e-16	2.46736203883771	0.0136125879657769	0.42020368735964	-4.43271
CROT	1.37493337283137	-1.43475e-15	2.4662261376889	0.01365583382098	0.42020368735964	-4.43289
ARSD	1.37471920328492	-4.6117e-16	2.46584198050443	0.0136704868320606	0.42020368735964	-4.43296
KITLG	1.37426679380337	-5.46571e-16	2.46503049093673	0.0137014853594383	0.42020368735964	-4.43308
CHPT1	-1.37425	2.1350442781253e-17	-2.465	0.0137025096441642	0.42020368735964	-4.43309
PPDPF	-1.37391	6.57593637662593e-16	-2.46438	0.0137262080739725	0.42020368735964	-4.43319
TEX30	-1.37388	-6.83214e-17	-2.46434	0.0137278514116574	0.42020368735964	-4.43319
MYL12A	-1.37339	-2.56205e-16	-2.46345	0.0137620289782527	0.42020368735964	-4.43333
TMCC1	1.37320877691609	2.04964250700029e-16	2.46313271977698	0.0137742218283983	0.42020368735964	-4.43338
GNA11	1.37301466125998	-5.12411e-17	2.46278453337442	0.0137876038361831	0.42020368735964	-4.43344
ADA	-1.37242	-3.07446e-16	-2.46171	0.0138288992816389	0.42020368735964	-4.43361
CRYZL1	-1.37209	3.62957527281301e-16	-2.46112	0.0138516530546813	0.42020368735964	-4.4337
PTPN7	-1.37152	-1.36643e-16	-2.46011	0.0138908987254623	0.42020368735964	-4.43386
CTSE	1.37115646897754	1.70803542250024e-16	2.45945148286715	0.0139162865978865	0.42020368735964	-4.43397
PTPRD	1.37108715280145	-3.07446e-16	2.45932715003137	0.0139211072999458	0.42020368735964	-4.43399
GZMA	-1.37084	7.68615940125108e-17	-2.45888	0.0139386266596461	0.42020368735964	-4.43406
DOK5	1.37047221926398	-3.80038e-16	2.45822414010157	0.0139639384107275	0.42020368735964	-4.43416
ACTB	-1.37019	-3.15987e-16	-2.45772	0.0139834056708415	0.42020368735964	-4.43424
LAT2	-1.37006	-4.44089e-16	-2.45749	0.0139926809801686	0.42020368735964	-4.43428
C12ORF29	-1.36956	1.02482125350014e-16	-2.45659	0.0140276678710738	0.42020368735964	-4.43442
EXPH5	1.36839578609229	-3.58687e-16	2.4544996296181	0.0141094261490002	0.42020368735964	-4.43475
BAG6	1.36835311032499	5.6365168942508e-16	2.45442308184142	0.014112430253938	0.42020368735964	-4.43476
YES1	-1.36823	-7.85696e-16	-2.45421	0.0141208364520454	0.42020368735964	-4.43479
CASP8	-1.3676	1.96424073587528e-16	-2.45307	0.0141655699716006	0.42020368735964	-4.43497
PPP1R14C	1.36742040504849	4.09928501400058e-16	2.45275008286044	0.0141782279546067	0.42020368735964	-4.43502
DCBLD1	1.36722209758423	1.11022302462516e-16	2.45239437758677	0.0141922524003953	0.42020368735964	-4.43508
AGPAT5	1.36717477532207	3.15986553162545e-16	2.45230949536474	0.0141956008730494	0.42020368735964	-4.43509
SBDS	-1.3663	5.12410626750072e-16	-2.45074	0.0142574656455079	0.42020368735964	-4.43534
CMKLR1	1.36623098961847	7.60075763012607e-16	2.45061662135601	0.014262527879019	0.42020368735964	-4.43536
FHL2	1.36548296382919	1.02482125350014e-15	2.44927488306553	0.0143157704873233	0.42020368735964	-4.43557
REEP5	-1.36539	2.8182584471254e-16	-2.44911	0.014322142705567	0.42020368735964	-4.4356
TMED3	1.36530295879646	-4.52629e-16	2.44895200697175	0.014328608938491	0.42020368735964	-4.43562
FOXJ1	1.3650693434626	3.24526730275046e-16	2.44853296976317	0.0143452861660639	0.42020368735964	-4.43569
HTATIP2	-1.36396	-6.14893e-16	-2.44654	0.0144247431151224	0.42020368735964	-4.436
DNAJC8	-1.36391	-8.54018e-16	-2.44645	0.0144285671779249	0.42020368735964	-4.43602
ABHD11	1.36377536512584	9.2233912815013e-16	2.44621195315337	0.014437970537791	0.42020368735964	-4.43605
UGCG	1.36356925635638	-8.36937e-16	2.44584225463233	0.0144527822411457	0.42020368735964	-4.43611
APOLD1	1.36327696353155	-1.87884e-16	2.44531796726052	0.0144738104111124	0.42020368735964	-4.43619
COL14A1	1.36030868514857	-1.36643e-16	2.43999374873714	0.0146888875998817	0.42020368735964	-4.43703
TRIAP1	-1.36013	-5.97812e-16	-2.43967	0.0147021097498126	0.42020368735964	-4.43708
TBC1D8	1.35912971788198	-1.28103e-16	2.43787902816538	0.0147750924884618	0.42020368735964	-4.43736
ARGLU1	-1.35882	-4.27009e-18	-2.43733	0.0147977505620899	0.42020368735964	-4.43745
ACVR1	1.35792725269261	-6.14893e-16	2.43572215923027	0.0148634744966685	0.42020368735964	-4.4377
CORO1A	-1.35695	1.02482125350014e-15	-2.43396	0.0149359960409119	0.42020368735964	-4.43797
APCDD1	1.35685818255982	-6.83214e-16	2.43380456179857	0.0149424427363902	0.42020368735964	-4.438
MXI1	1.35671231224463	-8.79638e-16	2.4335429133499	0.0149532462426844	0.42020368735964	-4.43804
LTBP3	1.35640924551855	-8.54018e-17	2.43299930076758	0.0149757140963415	0.42020368735964	-4.43812
H3F3B	-1.35632	-1.00774e-15	-2.43284	0.014982151855886	0.42020368735964	-4.43815
RIPK4	1.35609475378504	2.73285667600039e-16	2.43243519508174	0.0149990603806481	0.42020368735964	-4.43821
MFF	-1.35599	3.41607084500048e-17	-2.43224	0.0150070749098235	0.42020368735964	-4.43824
ARHGAP9	-1.35562	-3.41607e-17	-2.43158	0.0150344584832106	0.42020368735964	-4.43835
SURF6	1.35498101695633	1.28102656687518e-16	2.43043747873289	0.0150819966195207	0.42020368735964	-4.43853
ZNF133	1.35485562020189	-3.58687e-16	2.43021255383144	0.0150913597461448	0.42020368735964	-4.43856
SORCS2	1.35483207484977	2.73285667600039e-16	2.43017032039383	0.0150931184016114	0.42020368735964	-4.43857
MYO1D	1.35423855152394	-3.41607e-17	2.42910571408752	0.0151375096612924	0.42020368735964	-4.43873
HSH2D	-1.35372	-5.63652e-16	-2.42817	0.0151766376049375	0.42020368735964	-4.43888
CHRM3	-1.35264	-6.66134e-16	-2.42624	0.0152576905074003	0.42020368735964	-4.43918
BICC1	1.35113578591865	-7.34455e-16	2.4235402650366	0.0153714508582128	0.42020368735964	-4.4396
TMEM50A	-1.351	-1.06752e-15	-2.42329	0.0153819004572254	0.42020368735964	-4.43964
PRDX4	1.34934532908902	-5.58314e-16	2.42032871201237	0.0155078902372764	0.42020368735964	-4.4401
ALDH1A3	1.34927749321604	1.53723188025022e-16	2.42020703440506	0.0155130804686849	0.42020368735964	-4.44012
ATOH8	1.34920678069452	-4.8679e-16	2.42008019693622	0.0155184924243104	0.42020368735964	-4.44014
CP	1.34885217275233	1.19562479575017e-16	2.41944413456916	0.0155456572719363	0.42020368735964	-4.44024
TEAD1	1.34846671212739	6.83214169000096e-17	2.41875273156226	0.0155752330534731	0.42020368735964	-4.44035
RHBDF1	1.34813459912965	-8.54018e-17	2.41815701851034	0.0156007552516796	0.42020368735964	-4.44044
MAN2A1	1.3477331318079	-9.39419e-17	2.41743690419654	0.0156316563075892	0.42020368735964	-4.44055
TRAFD1	1.34673335892023	-8.96719e-16	2.41564360564401	0.0157088432616955	0.42020368735964	-4.44083
MIF	-1.34648	8.62557888362622e-16	-2.41519	0.0157282144453443	0.42020368735964	-4.4409
NARS2	1.34629995122182	-1.23833e-15	2.41486619968731	0.015742408326853	0.42020368735964	-4.44095
FSTL3	1.34594684895073	-2.04964e-16	2.41423283805144	0.015769800792743	0.42020368735964	-4.44105
AOX1	1.34558713994902	5.55111512312578e-16	2.41358762588369	0.0157977488860304	0.42020368735964	-4.44115
COL5A2	1.34525983934236	1.19562479575017e-16	2.41300054484618	0.0158232168080143	0.42020368735964	-4.44124
COL16A1	1.34419800723565	-5.29491e-16	2.41109593030475	0.0159060888807311	0.42020368735964	-4.44153
BACE2	1.34331051995463	0	2.40950403911018	0.0159756465497689	0.42020368735964	-4.44178
LGMN	1.34328136476116	1.62263365137523e-16	2.4094517432669	0.0159779361463134	0.42020368735964	-4.44179
MCAT	1.34318154376188	-5.63652e-16	2.40927269374903	0.0159857774086518	0.42020368735964	-4.44182
ARIH1	1.34243526099911	1.53723188025022e-16	2.40793408193553	0.0160445076112038	0.42020368735964	-4.44202
TPBG	1.34176473935958	5.80732043650082e-16	2.40673136329769	0.0160974373347278	0.42020368735964	-4.44221
NAAA	-1.34066	1.37496851511269e-15	-2.40475	0.0161847569975519	0.42020368735964	-4.44252
EMP3	-1.34038	-4.6971e-16	-2.40424	0.0162075121955225	0.42020368735964	-4.44259
TUBGCP6	1.34013560119647	1.87883896475026e-16	2.40380916852145	0.0162266784309896	0.42020368735964	-4.44266
GBP4	1.33976028857941	-1.00774e-15	2.4031359680564	0.0162565812597682	0.42020368735964	-4.44277
NBL1	1.33967727641564	-1.36643e-16	2.40298706864638	0.016263201744885	0.42020368735964	-4.44279
RAB15	1.33924311079869	-5.12411e-16	2.4022083032067	0.0162978664543294	0.42020368735964	-4.44291
CHIC2	-1.33924	8.45477534137619e-16	-2.4022	0.01629819480962	0.42020368735964	-4.44291
ITPA	1.33861955540142	-2.13504e-16	2.40108982819589	0.0163477660269342	0.42020368735964	-4.44308
NASP	1.33849925324764	-1.19562e-16	2.40087404150984	0.0163574085523361	0.42020368735964	-4.44311
ZNF839	1.33847724728034	-5.46571e-16	2.40083456927589	0.0163591729274499	0.42020368735964	-4.44312
S100A11	-1.33789	2.04964250700029e-16	-2.39979	0.0164060894120191	0.42020368735964	-4.44328
VIPR1	-1.33771	-3.75768e-16	-2.39947	0.0164204295168337	0.42020368735964	-4.44333
PJA1	1.3364622086515	-7.00295e-16	2.39722018254772	0.0165214432360233	0.42020368735964	-4.44368
CCDC80	1.33629395253768	6.83214169000096e-17	2.39691838055939	0.0165350565738427	0.42020368735964	-4.44372
HMCN1	1.33618849818864	2.30584782037533e-16	2.39672922646868	0.0165435937410318	0.42020368735964	-4.44375
SPA17	1.33617886666715	-8.54018e-17	2.39671195035152	0.0165443736638367	0.42020368735964	-4.44376
GOLM1	1.33611661540874	-3.24527e-16	2.39660028990045	0.0165494153053063	0.42020368735964	-4.44377
CD300E	-1.33605	7.00294523225099e-16	-2.39648	0.0165546483046573	0.42020368735964	-4.44379
LIMA1	1.3359221977126	-7.34455e-16	2.3962515617269	0.0165651696086349	0.42020368735964	-4.44383
GNG2	-1.33553	2.39124959150034e-16	-2.39554	0.0165971376216101	0.42020368735964	-4.44394
PUDP	1.33542942543764	5.12410626750072e-17	2.3953676731775	0.0166051595761339	0.42020368735964	-4.44396
TTC32	-1.33517	3.41607084500048e-16	-2.39491	0.0166259361535398	0.42020368735964	-4.44403
ASTN2	1.3347957561602	3.07446376050043e-16	2.3942310568399	0.0166567083541456	0.42020368735964	-4.44414
NLGN2	1.3347957561602	3.07446376050043e-16	2.3942310568399	0.0166567083541456	0.42020368735964	-4.44414
BAHCC1	1.3347957561602	3.07446376050043e-16	2.3942310568399	0.0166567083541456	0.42020368735964	-4.44414
MICALL2	1.33399498508905	-5.12411e-16	2.3927947090248	0.0167220517585946	0.42020368735964	-4.44436
ITGA2	1.33242071654972	-1.70804e-17	2.38997093421785	0.0168511694674728	0.42020368735964	-4.44479
ERICH3	1.33207666232614	2.04964250700029e-16	2.38935380211841	0.0168795042139915	0.42020368735964	-4.44489
JAK2	1.33190991835044	2.64745490487537e-16	2.3890547124612	0.0168932515306876	0.42020368735964	-4.44493
HPCAL1	-1.33121	-5.29491e-16	-2.3878	0.0169512327681475	0.42020368735964	-4.44513
HERC6	1.32975775430262	1.34507789521894e-16	2.38519436305648	0.0170715720629691	0.42020368735964	-4.44553
ABI2	1.32853873646171	-5.46571e-16	2.38300780353224	0.0171733063951337	0.42020368735964	-4.44586
POU6F1	1.32820338760232	2.56205313375036e-16	2.38240628629611	0.0172013863787479	0.42020368735964	-4.44595
SLC22A3	1.32809272620955	2.39124959150034e-16	2.38220779230021	0.0172106612949683	0.42020368735964	-4.44598
ACTR3B	1.32711385574938	4.9533027252507e-16	2.38045198655573	0.0172928950420997	0.42020368735964	-4.44625
GIT1	1.32701304892453	-3.24527e-16	2.3802711687567	0.0173013832443899	0.42020368735964	-4.44628
RFX7	1.32670844869838	-3.07446e-16	2.37972480552622	0.0173270535984269	0.42020368735964	-4.44636
RNF26	1.32601809812897	-6.66134e-16	2.37848651961935	0.0173853569533434	0.42020368735964	-4.44655
DHX40	1.32566958249312	-8.36937e-16	2.37786138505828	0.0174148560337925	0.42020368735964	-4.44665
TRAF3IP1	1.32498084502594	1.14438373307516e-15	2.37662599258245	0.017473281285814	0.42020368735964	-4.44684
DPT	1.32449144142369	-4.9533e-16	2.37574814644126	0.0175149015257402	0.42020368735964	-4.44697
FUT8	1.32404578628584	4.2700885562506e-17	2.37494877217987	0.0175528768557049	0.42020368735964	-4.44709
CLMN	1.32377940458944	-5.12411e-16	2.37447096175265	0.0175756103211412	0.42020368735964	-4.44717
SLC20A2	1.32350528158613	-4.44089e-16	2.37397926569736	0.0175990313847528	0.42020368735964	-4.44724
KRT19	1.32278767321916	7.00294523225099e-16	2.37269208731752	0.0176604734279341	0.42020368735964	-4.44744
HACD3	1.32242701993003	1.19562479575017e-16	2.37204518137584	0.0176914236995878	0.42020368735964	-4.44754
SPICE1	1.3223745622421	-1.19562e-16	2.37195108771016	0.0176959294316601	0.42020368735964	-4.44755
RAPGEF3	1.32131335271754	-2.04964e-16	2.37004758989802	0.0177872957889652	0.42020368735964	-4.44784
SPINK5	1.32122407063249	3.24526730275046e-16	2.36988744409305	0.0177950014766575	0.42020368735964	-4.44786
TGFB3	1.32121966296037	-3.20257e-16	2.36987953802546	0.0177953819662984	0.42020368735964	-4.44787
FGFR2	1.32053354551302	2.73285667600039e-16	2.36864884509471	0.01785469763628	0.42020368735964	-4.44805
CLU	1.31889	5.12410626750072e-17	2.36570589258864	0.0179972419219879	0.42020368735964	-4.4485
FBXL8	-1.31829	-8.54018e-17	-2.36462	0.01804985362447	0.42020368735964	-4.44867
DUS2	1.31804875516993	-6.31973e-16	2.36419186193328	0.0180709628068901	0.42020368735964	-4.44873
SLIT2	1.31783252975893	-5.12411e-17	2.36380401713238	0.0180898901706216	0.42020368735964	-4.44879
OPHN1	1.31771522622971	5.80732043650082e-16	2.36359360909695	0.0181001656369514	0.42020368735964	-4.44882
FNBP1L	1.31763788423482	7.85696294350111e-16	2.36345488030245	0.0181069433787171	0.42020368735964	-4.44884
FAM24B	-1.31728	5.80732043650082e-16	-2.36282	0.0181379545198893	0.42020368735964	-4.44894
RASSF8	-1.31714	2.22044604925031e-16	-2.36257	0.0181503834279484	0.42020368735964	-4.44898
NEURL1B	1.3166927894634	6.83214169000096e-17	2.36175965821102	0.0181899449420424	0.42020368735964	-4.4491
ADM5	1.31666685882656	-1.87884e-16	2.36171314627408	0.0181922269503837	0.42020368735964	-4.44911
MIB1	1.31636141545019	-2.56205e-16	2.36116527068005	0.0182191261637175	0.42020368735964	-4.44919
CLDN7	1.31615318012421	-1.53723e-16	2.36079	0.0182374845992015	0.42020368735964	-4.44925
TAF9	-1.31544	-1.02482e-15	-2.35952	0.0183003359466337	0.42020368735964	-4.44944
NOLC1	1.3147381555911	5.46571335200077e-16	2.35825361985255	0.0183626654738059	0.42020368735964	-4.44963
SFT2D1	-1.31445	4.2700885562506e-16	-2.35774	0.0183881674375857	0.42020368735964	-4.44971
ISLR	1.31422513531414	-1.13157e-16	2.35733341234199	0.0184082355020555	0.42020368735964	-4.44977
CIAO1	-1.31399	-1.24687e-15	-2.35692	0.0184287149119834	0.42020368735964	-4.44983
DDR1	1.31329660232187	-1.87884e-16	2.35566789721196	0.0184909660144562	0.42020368735964	-4.45002
WDR35	1.31320922246167	-6.83214e-17	2.35551116343897	0.0184987681185152	0.42020368735964	-4.45005
SLC9A1	1.31235261109212	3.67227615837552e-16	2.35397465454976	0.018575407209065	0.42020368735964	-4.45028
STX12	-1.31134	-1.00774e-15	-2.35216	0.0186665092855659	0.42020368735964	-4.45056
CRTC1	1.31119309593512	-5.20951e-16	2.35189482534222	0.0186795889114575	0.42020368735964	-4.45059
ABLIM1	1.31099656277969	-6.66134e-16	2.35154230265682	0.0186972978652786	0.42020368735964	-4.45065
ADGRA3	1.3108932396525	7.51535585900106e-16	2.35135697135136	0.0187066138604137	0.42020368735964	-4.45068
PTPRN2	1.31083827852667	2.90366021825041e-16	2.35125838725429	0.0187115710130317	0.42020368735964	-4.45069
SCARA3	1.31066802228974	6.31973106325089e-16	2.35095299763329	0.0187269343639771	0.42020368735964	-4.45074
ZNF607	1.31066507762307	-2.90366e-16	2.35094771576725	0.0187272001778552	0.42020368735964	-4.45074
ASPA	1.31003447525313	4.78249918300067e-16	2.3498166005598	0.0187842004930545	0.42020368735964	-4.45091
SEMA4A	1.30990216753694	-5.80732e-16	2.34957927942532	0.0187961790644548	0.42020368735964	-4.45094
DNASE1	1.30978998629496	-3.75768e-16	2.34937805926687	0.0188063407051371	0.42020368735964	-4.45097
FLNB	1.30974161191683	9.2233912815013e-16	2.34929128985818	0.0188107240526218	0.42020368735964	-4.45099
CNBP	-1.30962	2.1265041010128e-15	-2.34907	0.0188220530013541	0.42020368735964	-4.45102
IDO1	1.30931504206526	-1.53723e-16	2.34852614898788	0.0188494155251472	0.42020368735964	-4.4511
HNRNPDL	-1.30928	6.74673991887595e-16	-2.34846	0.0188527867004482	0.42020368735964	-4.45111
TWSG1	1.3092506516561	3.92848147175055e-16	2.34841065152945	0.018855262017123	0.42020368735964	-4.45112
SAMM50	1.30857477178208	-2.13504e-16	2.34719832179465	0.0189167260184941	0.42020368735964	-4.4513
DDX51	1.30848296337448	-2.13504e-16	2.34703364450994	0.0189250885072906	0.42020368735964	-4.45133
VAMP4	-1.30786	-3.41607e-16	-2.34591	0.0189822172820738	0.42020368735964	-4.4515
ASXL1	-1.30785	-1.85215e-16	-2.3459	0.0189825882897783	0.42020368735964	-4.4515
PAQR7	1.30767512662691	1.4518301091252e-15	2.34558462294919	0.0189988108539271	0.42020368735964	-4.45155
PTH1R	1.30766832354972	2.73285667600039e-16	2.34557242022932	0.0189994327604567	0.42020368735964	-4.45155
WDR74	1.30742724584723	-1.28103e-16	2.34513999772592	0.0190214824877117	0.42020368735964	-4.45161
C5AR1	-1.30704	-1.79344e-16	-2.34445	0.0190565580519612	0.42020368735964	-4.45172
SNRNP70	1.30627743367397	1.11022302462516e-15	2.3430775728178	0.0191269560520129	0.42020368735964	-4.45192
LRTOMT	1.30603514357975	6.49053460550092e-16	2.34264297564017	0.019149246699849	0.42020368735964	-4.45199
PPP1R13L	1.30600962044105	-1.33227e-15	2.34259719463505	0.019151596145842	0.42020368735964	-4.452
SLC12A9	1.30585333415726	2.39124959150034e-16	2.34231686300177	0.0191659880459556	0.42020368735964	-4.45204
CIC	1.30583	7.30185143118853e-16	2.34227534579249	0.0191681202947395	0.42020368735964	-4.45205
CDC26	-1.30538	-3.71498e-16	-2.34147	0.0192096560972297	0.42020368735964	-4.45217
UBQLN4	1.30510150482483	-2.39125e-16	2.34096830227342	0.0192353537907921	0.42020368735964	-4.45224
DDT	-1.30499	1.4518301091252e-15	-2.34077	0.0192456385333177	0.42020368735964	-4.45227
PLCD1	1.30461461632591	-2.90366e-16	2.34009496748795	0.0192803923721553	0.42020368735964	-4.45237
NBEAL1	-1.30459	7.51535585900106e-16	-2.34005	0.0192828753874442	0.42020368735964	-4.45238
SNTB2	1.30458268718486	2.56205313375036e-16	2.34003769599846	0.0192833491266653	0.42020368735964	-4.45238
NFATC1	1.30454606275491	-2.2845e-16	2.33997200254146	0.019286741169958	0.42020368735964	-4.45239
SLC35E2B	1.3040698841796	9.56499836600135e-16	2.33911787820945	0.0193308908685743	0.42020368735964	-4.45252
CLCN5	-1.30393	7.42995408787605e-16	-2.33886	0.0193442188169136	0.42020368735964	-4.45256
ANXA3	-1.30344	-8.54018e-16	-2.33799	0.0193895078141064	0.42020368735964	-4.45269
ANKUB1	1.3034352486139	8.71098065475123e-16	2.33797952863487	0.0193898694497908	0.42020368735964	-4.45269
REXO4	1.3033624970012	-5.12411e-17	2.33784903363609	0.0193966405097028	0.42020368735964	-4.45271
SMIM10	1.30334956019818	1.23832568131267e-16	2.33782582881585	0.0193978447662636	0.42020368735964	-4.45271
BMP1	1.30326343957156	-2.56205e-16	2.3376713537376	0.019405863197949	0.42020368735964	-4.45274
NFKBIE	-1.30313	4.05658412843807e-16	-2.33743	0.0194184618450008	0.42020368735964	-4.45277
STK17A	-1.30275	-2.30585e-16	-2.33675	0.0194536767791506	0.42020368735964	-4.45288
CD99L2	1.30240486846152	-3.41607e-17	2.33613132965027	0.0194859606524783	0.42020368735964	-4.45297
IL33	1.30115084320638	1.70803542250024e-17	2.33388197711969	0.0196034696227847	0.42020368735964	-4.45331
ARID5B	1.30072276987861	-1.19562e-16	2.33311413945522	0.0196437238816359	0.42020368735964	-4.45342
TEC	-1.30067	6.14892752100087e-16	-2.33301	0.0196490269433185	0.42020368735964	-4.45344
CCDC112	-1.3005	-8.36937e-16	-2.33272	0.0196646504403894	0.42020368735964	-4.45348
LYRM1	-1.30031	3.24526730275046e-16	-2.33238	0.019682509988355	0.42020368735964	-4.45353
LY86	-1.29997	-4.6117e-16	-2.33176	0.019715148621574	0.42020368735964	-4.45363
SETD5	1.29973725703122	-5.12411e-16	2.33134641922144	0.0197366719919719	0.42020368735964	-4.45369
HNF1B	1.29945476193101	-3.41607e-17	2.33083970608633	0.0197633860890803	0.42020368735964	-4.45376
ARL1	1.29891462804197	1.53723188025022e-16	2.32987086472912	0.0198145516605477	0.42020368735964	-4.45391
OAZ1	-1.2985	-1.13584e-15	-2.32913	0.0198536989756618	0.42020368735964	-4.45402
LACTB	-1.29837	-4.7825e-16	-2.32889	0.0198665684872699	0.42020368735964	-4.45405
SLC4A4	1.29813905010726	-6.31973e-16	2.32847970599213	0.0198882225331685	0.42020368735964	-4.45412
RBFOX2	1.29812169150424	-3.07446e-16	2.32844856976305	0.0198898741306431	0.42020368735964	-4.45412
CIB1	1.29734803447914	-9.30879e-16	2.32706085657301	0.0199636060144206	0.42020368735964	-4.45433
RNF166	-1.29708	-7.00295e-16	-2.32658	0.0199890980556866	0.42020368735964	-4.4544
KRT18	1.29647748880844	-1.22979e-15	2.32549935364525	0.0200468568612172	0.42020368735964	-4.45456
CCDC28A	-1.29597	4.09928501400058e-16	-2.32459	0.0200955035219486	0.42020368735964	-4.4547
SLC12A2	1.29595584768524	3.92848147175055e-16	2.32456368287171	0.0200968867858863	0.42020368735964	-4.4547
CLPTM1L	1.29595231923316	6.83214169000096e-16	2.3245573538663	0.0200972255658432	0.42020368735964	-4.4547
NT5DC2	1.29550661533458	3.41607084500048e-16	2.3237578921425	0.0201400593712309	0.42020368735964	-4.45482
FAIM	1.29548746908043	1.11022302462516e-15	2.32372	0.0201419011809079	0.42020368735964	-4.45483
DTNB	1.29511279381289	3.07446376050043e-16	2.32305149214557	0.0201779733616714	0.42020368735964	-4.45493
BGN	1.29488959679651	-4.7825e-16	2.32265114233479	0.0201994886267211	0.42020368735964	-4.45499
NEMP1	-1.2943	1.79343719362525e-16	-2.32159	0.0202564226725215	0.42020368735964	-4.45514
SPIN1	1.29394888547615	8.41207445581369e-16	2.32096378286548	0.020290389418954	0.42020368735964	-4.45524
STT3B	1.29394534879835	1.70803542250024e-16	2.32095743910556	0.0202907318398852	0.42020368735964	-4.45524
RGS5	1.29369874973261	-1.12303e-15	2.32051511290019	0.0203146199810268	0.42020368735964	-4.45531
LMF1	1.29334101791508	-1.02482e-16	2.31987344721941	0.0203493172027501	0.42020368735964	-4.4554
AGER	-1.29329	-5.0387e-16	-2.31978	0.0203544345307676	0.42020368735964	-4.45542
CXCL8	-1.29253	1.70803542250024e-17	-2.31842	0.0204279702459179	0.42020368735964	-4.45562
IRF1	1.29228607249511	-1.34935e-15	2.31798118536879	0.0204519399493981	0.42020368735964	-4.45568
TNXB	1.29218816575241	-2.90366e-16	2.31780556946428	0.0204614869505029	0.42020368735964	-4.45571
SULT1B1	-1.29217	4.01388324287557e-16	-2.31776	0.0204637460681708	0.42020368735964	-4.45572
CCDC170	1.29200773775675	3.41607084500048e-16	2.3174819346994	0.0204790908777014	0.42020368735964	-4.45576
ZFYVE1	1.2914057088716	4.2700885562506e-16	2.31640207192092	0.0205379249972769	0.42020368735964	-4.45592
PILRB	1.29117965803842	7.85696294350111e-16	2.31599660320202	0.0205600541666765	0.42020368735964	-4.45598
YBX1	-1.29077	-1.05898e-15	-2.31525	0.0206006382226712	0.42020368735964	-4.45609
KLHL9	-1.29071	-8.45478e-16	-2.31515	0.0206064346759585	0.42020368735964	-4.45611
NBPF19	-1.28982	-4.9533e-16	-2.31357	0.0206931252786387	0.42020368735964	-4.45634
CDKN2D	-1.28944	2.98906198937542e-16	-2.31287	0.0207313250240701	0.42020368735964	-4.45644
MID1	1.2893048446392	7.85696294350111e-16	2.31263373929908	0.0207443911170686	0.42020368735964	-4.45648
LCAT	1.28916992739601	-1.02482e-16	2.31239173744057	0.0207577119618646	0.42020368735964	-4.45652
GPN3	-1.28891	3.24526730275046e-16	-2.31193	0.0207832225947293	0.42020368735964	-4.45658
TXLNA	1.28870322804124	8.62557888362622e-16	2.31155461604259	0.0208038483260659	0.42020368735964	-4.45664
SYNE1	1.28861466530628	-8.02777e-16	2.31139576054014	0.0208126134302113	0.42020368735964	-4.45666
ARPC5	-1.28857	6.83214169000096e-17	-2.31132	0.0208168514831909	0.42020368735964	-4.45667
VWA1	1.28799605437885	-1.36643e-16	2.31028615445417	0.020873927523893	0.42020368735964	-4.45683
C1R	1.28770716470727	-4.18469e-16	2.30976797133852	0.0209026149316286	0.42020368735964	-4.4569
CCAR1	1.28767116362963	8.54017711250121e-16	2.30970339599223	0.0209061923280122	0.42020368735964	-4.45691
DENND1A	1.28744330291062	5.12410626750072e-17	2.30929468087041	0.0209288470323508	0.42020368735964	-4.45697
REXO2	1.28663625030494	-1.84468e-15	2.30784706582961	0.0210092591803393	0.42020368735964	-4.45719
SYDE2	1.28640210623018	3.75767792950053e-16	2.30742708021534	0.0210326388756559	0.42020368735964	-4.45725
FTL	-1.28631	9.05258773925128e-16	-2.30726	0.0210416724845984	0.42020368735964	-4.45728
GPC1	1.28615703420356	1.70803542250024e-17	2.30698749306907	0.0210571340250795	0.42020368735964	-4.45732
FUCA1	1.28595523499361	-1.85749e-16	2.30662552463048	0.0210773226779743	0.42020368735964	-4.45737
FGFR1OP	1.28579951035806	2.56205313375036e-16	2.30634620042898	0.0210929134061413	0.42020368735964	-4.45741
CFI	1.28545337504783	6.83214169000096e-16	2.30572533547208	0.0211276035262134	0.42020368735964	-4.4575
EPHX1	1.28524327960239	-7.00295e-16	2.30534848602672	0.0211486837904387	0.42020368735964	-4.45756
STAP2	1.2851753496868	1.19562479575017e-16	2.30522663973463	0.0211555035666387	0.42020368735964	-4.45758
MKRN1	-1.28469	-4.96932e-16	-2.30435	0.0212044516109143	0.42020368735964	-4.45771
ANTXR1	1.28454450564723	-3.41607e-17	2.30409509104293	0.0212189282747209	0.42020368735964	-4.45775
ST6GAL1	1.28441671282989	-9.05259e-16	2.30386586830926	0.0212317966493915	0.42020368735964	-4.45778
GPAA1	1.28425311035158	-9.05259e-16	2.30357241357453	0.0212482808771544	0.42020368735964	-4.45782
SELP	1.28385311739969	-4.09929e-16	2.30285494384666	0.0212886302453676	0.42020368735964	-4.45793
DAB2IP	1.28385235322887	5.46571335200077e-16	2.30285357314893	0.0212887073950758	0.42020368735964	-4.45793
CTHRC1	1.2836736160532	4.2273876706881e-16	2.30253297121788	0.0213067591625649	0.42020368735964	-4.45798
CAPRIN1	1.2835857165825	1.10168284751266e-15	2.30237530541644	0.0213156415603467	0.42020368735964	-4.458
OSTF1	-1.2832	3.07446376050043e-16	-2.30168	0.0213550507758824	0.42020368735964	-4.4581
H2AFX	1.2825768115755	-5.12411e-16	2.30056562652736	0.0214178243749636	0.42020368735964	-4.45827
KLHL17	1.28206179824611	1.17854444152517e-15	2.29964184406685	0.0214701496454043	0.42020368735964	-4.4584
ZKSCAN3	1.28206179824611	1.17854444152517e-15	2.29964184406685	0.0214701496454043	0.42020368735964	-4.4584
FOPNL	-1.28182	-7.17375e-16	-2.2992	0.021495218553841	0.42020368735964	-4.45847
ZFYVE21	1.28121077255761	-5.25221e-16	2.29811535424684	0.0215568576604842	0.42020368735964	-4.45863
VAMP2	-1.28089	-3.41607e-17	-2.29754	0.0215898207923988	0.42020368735964	-4.45872
SMAD3	1.28073629797003	8.02776648575113e-16	2.2972642863677	0.0216053324492473	0.42020368735964	-4.45876
ADRM1	-1.27985	-6.83214e-17	-2.29568	0.021695632332866	0.42020368735964	-4.45899
NVL	1.27978233504919	-7.34455e-16	2.29555315742413	0.0217030815134036	0.42020368735964	-4.45901
NCF2	-1.27933	-6.14893e-16	-2.29474	0.0217494972796808	0.42020368735964	-4.45913
CHCHD6	1.27920492958073	-3.24527e-16	2.29451746181406	0.0217624329362424	0.42020368735964	-4.45916
ABCA5	1.27902257849338	1.87883896475026e-16	2.29419037758821	0.0217812061038171	0.42020368735964	-4.45921
GSTK1	1.27884537289168	-2.23753e-15	2.29387252285044	0.0217994630413113	0.42020368735964	-4.45926
PSMD9	-1.27863	-1.40913e-16	-2.29348	0.0218217628175271	0.42020368735964	-4.45931
DEF8	-1.27855	-3.24527e-16	-2.29335	0.0218295594188496	0.42020368735964	-4.45933
MGAT4C	-1.27845	-7.68616e-17	-2.29317	0.0218397845819741	0.42020368735964	-4.45936
ELP5	-1.27833	5.97812397875084e-16	-2.29295	0.0218525872381143	0.42020368735964	-4.45939
MMP23B	1.2781403714249	-3.82173e-16	2.29260795754216	0.0218722290789059	0.42020368735964	-4.45944
ERMARD	1.27767502763388	3.41607084500048e-16	2.29177326762693	0.0219203747952783	0.42020368735964	-4.45957
C3	1.27764582837624	5.12410626750072e-16	2.29172089274549	0.0219233989009218	0.42020368735964	-4.45957
SRGAP2C	1.27734047464223	-4.18469e-16	2.29117317794348	0.0219550454974041	0.42020368735964	-4.45965
FGD6	1.2772929287794	4.91060183968819e-16	2.29108789464761	0.0219599766838191	0.42020368735964	-4.45967
HECTD4	1.27661331529962	4.2700885562506e-16	2.28986886792204	0.022030567724087	0.42020368735964	-4.45985
TBXAS1	-1.27557	3.41607084500048e-17	-2.288	0.0221391132408813	0.42020368735964	-4.46012
BIN2	-1.27545	5.12410626750072e-16	-2.28778	0.0221520427137562	0.42020368735964	-4.46015
NUCB2	1.27467345685225	5.97812397875084e-16	2.28638933233083	0.0222331465750277	0.42020368735964	-4.46036
SOX4	1.27408257113273	5.46571335200077e-16	2.28532945711456	0.0222951736035832	0.42020368735964	-4.46051
FBLN2	1.27406683601455	1.70803542250024e-16	2.28530123293985	0.0222968274204656	0.42020368735964	-4.46052
EPS8	1.27404600887726	4.61169564075065e-16	2.28526387518029	0.0222990165907048	0.42020368735964	-4.46052
DOCK11	-1.27379	4.86790095412569e-16	-2.2848	0.022326394606561	0.42020368735964	-4.46059
RUVBL2	1.27309958788238	5.89272220762583e-16	2.28356627423397	0.0223986936713687	0.42020368735964	-4.46077
PSMB3	-1.27296	3.41607084500048e-17	-2.28331	0.0224137812966699	0.42020368735964	-4.46081
SLC29A1	1.2729084396447	-6.49053e-16	2.28322341050745	0.0224188723606485	0.42020368735964	-4.46082
PUS7L	1.27239640726593	-2.30585e-16	2.28230497499572	0.0224730032822314	0.42020368735964	-4.46096
SYTL3	-1.27223	-2.90366e-16	-2.28201	0.0224904118036542	0.42020368735964	-4.461
EIF2AK1	-1.27214	-6.83214e-16	-2.28184	0.0225004205647904	0.42020368735964	-4.46103
DHCR24	1.27193298981531	-3.07446e-16	2.28147374036867	0.0225220926543743	0.42020368735964	-4.46108
TRMT44	1.27167443534689	7.34455231675104e-16	2.28100996968666	0.0225495215723446	0.42020368735964	-4.46115
AAAS	1.27158898123831	-4.09929e-16	2.28085669014577	0.0225585934084577	0.42020368735964	-4.46117
STK32A	1.27104932408067	5.55111512312578e-16	2.2798887039045	0.0226159568941157	0.42020368735964	-4.46131
CNTNAP3B	1.27091335028595	6.83214169000096e-16	2.27964480690322	0.0226304303665799	0.42020368735964	-4.46135
IL20RA	1.27073945138224	5.80732043650082e-16	2.27933288340925	0.0226489524356138	0.42020368735964	-4.46139
ANXA5	-1.27018	-1.913e-15	-2.27833	0.0227087967346793	0.42020368735964	-4.46154
ULK4	1.27011229406293	-5.12411e-17	2.27820794760953	0.0227158607864903	0.42020368735964	-4.46156
ADAMTS9	1.26997640830573	4.44089209850063e-16	2.27796420852167	0.0227303803918756	0.42020368735964	-4.46159
CNKSR3	1.26992532599749	-1.87884e-16	2.27787258188272	0.0227358407015147	0.42020368735964	-4.46161
GLIS3	1.26943275381927	4.05658412843807e-16	2.27698905224803	0.022788551425527	0.42020368735964	-4.46174
TMEM237	1.26890060161507	-9.05259e-16	2.2760345276862	0.0228456169420106	0.42020368735964	-4.46188
LAPTM4B	1.26826588778734	-8.54018e-18	2.27489603773257	0.0229138429971251	0.42020368735964	-4.46204
KIAA2013	1.26825201903535	5.12410626750072e-17	2.27487116126995	0.0229153357376543	0.42020368735964	-4.46205
PCDH12	-1.26787	-9.8212e-16	-2.27419	0.0229564391103675	0.42020368735964	-4.46215
CRACR2B	1.26768699215502	7.17374877450101e-16	2.27385766920677	0.0229762233567286	0.42020368735964	-4.46219
ROBO3	1.26748238173596	-3.75768e-16	2.27349065828572	0.0229983069238593	0.42020368735964	-4.46225
FBF1	1.2669280976332	-6.83214e-17	2.27249643560632	0.0230582233521347	0.42020368735964	-4.46239
KHDRBS3	1.26681941766236	9.05258773925128e-16	2.27230149569867	0.0230699872102792	0.42020368735964	-4.46242
PHLDA3	-1.26623	-2.73286e-16	-2.27124	0.0231343902832474	0.42020368735964	-4.46258
RAP2B	1.2660557449765	-2.56205e-16	2.27093169147708	0.0231527966065846	0.42020368735964	-4.46262
PODN	1.26592542581459	6.83214169000096e-17	2.27069793722419	0.0231669536098496	0.42020368735964	-4.46266
LCA5	1.26515224873564	5.38031158087576e-16	2.2693110849164	0.0232511010907379	0.42020368735964	-4.46286
TJP3	1.26501007296279	-8.71098e-16	2.26905606339021	0.0232666034127711	0.42020368735964	-4.46289
SSPN	1.26348711242996	1.02482125350014e-16	2.26632432005852	0.0234332251071255	0.42020368735964	-4.46329
HEYL	1.26310873768017	2.8182584471254e-16	2.26564562702787	0.023474782013417	0.42020368735964	-4.46339
UGP2	-1.26291	3.75767792950053e-16	-2.2653	0.0234962316822072	0.42020368735964	-4.46344
MRC1	-1.26266	2.8182584471254e-16	-2.26484	0.0235244323500586	0.42020368735964	-4.46351
WWC3	1.26264938276232	1.70803542250024e-17	2.26482167938993	0.0235253189229173	0.42020368735964	-4.46351
ABCE1	1.26252959186964	5.03870449637571e-16	2.26460680975593	0.0235385134847062	0.42020368735964	-4.46354
SLC25A33	-1.26196	4.09928501400058e-16	-2.26359	0.0236012041291854	0.42020368735964	-4.46369
SLC36A4	-1.26159	9.39419482375133e-16	-2.26293	0.023641784314901	0.42020368735964	-4.46379
ESYT2	1.26143266587928	8.45477534137619e-16	2.26263924710743	0.0236596351287488	0.42020368735964	-4.46383
TM9SF2	1.26122955120972	3.46944695195361e-16	2.26227491912115	0.0236821221186874	0.42020368735964	-4.46388
REPS2	1.26105617382985	-8.54018e-17	2.26196393108757	0.0237013315366306	0.42020368735964	-4.46393
ZFP28	-1.2607	-4.27009e-16	-2.26132	0.0237409627294289	0.42020368735964	-4.46402
RASSF1	-1.26045	8.02776648575113e-16	-2.26087	0.0237687844813926	0.42020368735964	-4.46409
WIPF1	-1.2603	5.12410626750072e-17	-2.26061	0.023785266547059	0.42020368735964	-4.46412
TPD52	-1.25983	-8.19857e-16	-2.25977	0.0238373418215796	0.42020368735964	-4.46425
BMP4	1.25975070704591	-3.07446e-16	2.25962230758197	0.0238464058653606	0.42020368735964	-4.46427
ACBD3	1.25958170463614	-1.11876e-15	2.25931916695819	0.0238652430154567	0.42020368735964	-4.46431
VWA3A	1.25939070306586	-9.90661e-16	2.25897656630985	0.0238865477453693	0.42020368735964	-4.46436
VEPH1	-1.2588	-2.22045e-16	-2.25792	0.0239522925114219	0.42020368735964	-4.46451
GABRE	1.25879713499823	1.09314267040015e-15	2.2579118797499	0.0239528609382761	0.42020368735964	-4.46452
GRK6	-1.25864	2.39124959150034e-16	-2.25762	0.0239708078610638	0.42020368735964	-4.46456
TSHZ2	1.25852837586797	3.92848147175055e-16	2.25742980490547	0.0239829390778714	0.42020368735964	-4.46459
PNPLA2	1.2584505089375	8.11316825687614e-16	2.2572901345309	0.0239916596616897	0.42020368735964	-4.46461
KRT7	1.25822555401735	1.87883896475026e-16	2.25688663155772	0.0240168685817079	0.42020368735964	-4.46466
TMED5	-1.25798	3.78303158030327e-16	-2.25645	0.0240440394240176	0.42020368735964	-4.46473
FBXO34	1.2576167255747	-4.14199e-16	2.25579457237266	0.0240852104132855	0.42020368735964	-4.46482
KLK11	1.25712898114118	3.75767792950053e-16	2.25491970229225	0.0241400819903212	0.42020368735964	-4.46495
SH3RF1	1.25661714426953	-2.39125e-16	2.25400161746281	0.0241977804981133	0.42020368735964	-4.46508
STARD9	1.25595147917047	-8.36937e-16	2.25280761003039	0.0242729986298742	0.42020368735964	-4.46526
GRPEL1	-1.25584	-1.02482e-16	-2.25261	0.0242851646500876	0.42020368735964	-4.46528
ZDHHC4	1.25576607788947	5.89272220762583e-16	2.25247505465411	0.0242939844630581	0.42020368735964	-4.4653
C5AR2	-1.25552	-8.54018e-18	-2.25204	0.0243215390417652	0.42020368735964	-4.46537
SPP1	1.25528115926426	1.19562479575017e-16	2.25160525324279	0.0243489474643661	0.42020368735964	-4.46543
SPPL2B	1.25487353371434	-2.39125e-16	2.25087409287861	0.0243952330433446	0.42020368735964	-4.46554
DST	1.25481226646028	-5.12411e-17	2.25076419744198	0.0244021964824063	0.42020368735964	-4.46555
NPL	-1.25468	4.44089209850063e-16	-2.25053	0.0244167712889106	0.42020368735964	-4.46558
KIAA1324L	1.25455436745717	-1.36643e-16	2.25030160247198	0.0244315273442751	0.42020368735964	-4.46562
RPA1	1.25448393052149	7.85696294350111e-16	2.25017525932309	0.0244395434490456	0.42020368735964	-4.46564
WNT5A	1.25398898994554	-1.45183e-16	2.24928748147937	0.0244959346713405	0.42020368735964	-4.46576
S100A2	1.25330786410381	-2.90366e-16	2.2480657420212	0.0245737233027732	0.42020368735964	-4.46594
GABPB1	-1.25277	2.39124959150034e-16	-2.24711	0.0246347625440861	0.42020368735964	-4.46608
FBXL17	1.25256498374407	1.87883896475026e-16	2.24673323311818	0.0246588085960237	0.42020368735964	-4.46613
TMEM184A	1.25217124585635	2.56205313375036e-17	2.24602698313597	0.0247040084911727	0.42020368735964	-4.46624
ADAM15	1.25209937595817	8.54017711250121e-17	2.24589806967376	0.0247122666751193	0.42020368735964	-4.46625
TRNP1	1.25201727348088	1.19562479575017e-15	2.24575080197376	0.0247217035559509	0.42020368735964	-4.46628
ADAM23	1.25201727348088	1.19562479575017e-15	2.24575080197376	0.0247217035559509	0.42020368735964	-4.46628
FOLR2	1.2515893925559	-8.54018e-17	2.24498330942332	0.0247709348467218	0.42020368735964	-4.46639
CLDN1	1.25136231326901	6.23432929212588e-16	2.24457599596091	0.0247970966996742	0.42020368735964	-4.46644
SDCCAG8	-1.25056	-9.565e-16	-2.24313	0.0248902697264898	0.42020368735964	-4.46665
HOXB3	1.25016501603348	-5.12411e-17	2.24242839681524	0.0249354336746722	0.42020368735964	-4.46675
EFHC1	1.2497244470724	-7.17375e-16	2.24163814565927	0.0249865054106247	0.42020368735964	-4.46687
IFI16	1.24970159382755	-2.64745e-16	2.24159715365857	0.0249891570788934	0.42020368735964	-4.46687
F3	1.24951	3.58687438725051e-16	2.24126216405375	0.0250108358377445	0.42020368735964	-4.46692
DZIP3	1.24899752301318	-7.17375e-16	2.24033425766703	0.0250709700842003	0.42020368735964	-4.46706
UBAP2L	1.24886875755909	1.70803542250024e-16	2.24010329030906	0.0250859576828426	0.42020368735964	-4.46709
EVI2B	-1.24859	3.75767792950053e-16	-2.23961	0.0251181190982896	0.42020368735964	-4.46716
ITGB6	1.24816231517807	1.24686585842518e-15	2.23883614042436	0.0251683218239816	0.42020368735964	-4.46727
FILIP1	1.24808414392373	-9.90661e-16	2.23869592418227	0.0251774501818804	0.42020368735964	-4.46729
STAU1	1.24804416945489	4.18468678512559e-16	2.23862422174065	0.0251821192616755	0.42020368735964	-4.4673
BRD8	1.24797403418345	2.56205313375036e-17	2.2384984196887	0.0251903129809924	0.42020368735964	-4.46732
NDNF	1.24734456183134	-9.90661e-16	2.23736933140094	0.0252639559425791	0.42020368735964	-4.46748
NSFL1C	1.24727438033181	2.8182584471254e-16	2.23724344642938	0.0252721781210857	0.42020368735964	-4.4675
TIPIN	-1.24702	-6.57594e-16	-2.23679	0.025301706664499	0.42020368735964	-4.46757
ITGA6	1.24675341915239	-1.03336e-15	2.23630899527503	0.0253332842458399	0.42020368735964	-4.46764
TGM2	1.24632306870121	-7.00295e-16	2.23553707312082	0.0253838585877805	0.42020368735964	-4.46775
SLC25A28	1.24583269915811	-2.90366e-16	2.23465749436579	0.0254415927874246	0.42020368735964	-4.46787
PRKAB1	1.24556411069591	2.56205313375036e-16	2.23417572564968	0.025473263481177	0.42020368735964	-4.46794
ZNF630	1.24545828908464	2.90366021825041e-16	2.23398591279852	0.0254857508343467	0.42020368735964	-4.46797
PLEKHS1	1.24541108095195	4.44089209850063e-16	2.23390123529119	0.0254913232820156	0.42020368735964	-4.46798
KRT8	1.24507493129062	-8.19857e-16	2.2332982816519	0.0255310328726592	0.42020368735964	-4.46807
WDR78	1.24346419088458	-9.90661e-16	2.23040908704152	0.0257220542211195	0.42020368735964	-4.46848
SYF2	-1.24317	-6.74674e-16	-2.22988	0.0257570955691256	0.42020368735964	-4.46856
NFIB	1.24302431409869	-5.12411e-16	2.22962007744427	0.0257744346026007	0.42020368735964	-4.4686
CFAP43	1.24270719484799	-2.73286e-16	2.22905125876529	0.0258122542604092	0.42020368735964	-4.46868
STAT2	1.24235405104267	-7.34455e-16	2.22841782262921	0.0258544266775926	0.42020368735964	-4.46877
PAIP2	-1.24196	-8.71098e-16	-2.22771	0.0259014057430796	0.42020368735964	-4.46887
OSCP1	1.24173069298883	-2.73286e-16	2.22729970159448	0.0259290134877205	0.42020368735964	-4.46893
TRMT10B	1.2417274754094	6.83214169000096e-16	2.22729393020319	0.025929398963655	0.42020368735964	-4.46893
LIG1	1.24107156307714	2.73285667600039e-16	2.22611741636636	0.0260080828148594	0.42020368735964	-4.4691
MUC1	1.24085765411856	1.19562479575017e-16	2.2257337265999	0.0260337881301537	0.42020368735964	-4.46915
FUOM	-1.23995	0	-2.22411	0.0261429067882021	0.42020368735964	-4.46938
RNF212	1.23957695236866	-3.41607e-17	2.2234365242826	0.0261881491784295	0.42020368735964	-4.46948
IGFBP5	1.2388096883523	0	2.22206027827022	0.0262810047616597	0.42020368735964	-4.46968
RNF214	1.23878517622243	2.30584782037533e-16	2.22201631071762	0.0262839759450591	0.42020368735964	-4.46968
RIF1	1.23866403211624	2.04964250700029e-16	2.22179901381654	0.0262986644217735	0.42020368735964	-4.46971
GOLGA8A	1.23865130203284	3.41607084500048e-17	2.22177617979052	0.0263002083303025	0.42020368735964	-4.46972
KIAA1614	1.23823539641468	-3.41607e-17	2.22103016741887	0.0263506925949041	0.42020368735964	-4.46982
ID1	1.23768578482619	1.02482125350014e-15	2.22004432585601	0.0264175350458795	0.42020368735964	-4.46996
COL6A1	1.23752452085221	9.39419482375132e-17	2.21975506571036	0.0264371753634243	0.42020368735964	-4.47001
CYCS	-1.23743	-5.38031e-16	-2.21958	0.0264488055140448	0.42020368735964	-4.47003
ME3	1.23709502925083	1.66533453693773e-16	2.2189846840801	0.0264895446403515	0.42020368735964	-4.47012
CAPN2	1.23696873409473	-5.29491e-16	2.21875814771028	0.0265049612520229	0.42020368735964	-4.47015
PFDN2	-1.23673	-2.25461e-15	-2.21833	0.0265341816625981	0.42020368735964	-4.47021
MAZ	1.2366363819321	-2.90366e-16	2.21816200566689	0.0265455678966827	0.42020368735964	-4.47023
TBL2	1.2366175134964	1.62263365137523e-16	2.21812816124198	0.0265478748452965	0.42020368735964	-4.47024
DOCK9	1.23645459305664	6.31973106325089e-16	2.21783592988383	0.026567801511816	0.42020368735964	-4.47028
SLC35D1	1.23640180973342	8.21992047078241e-16	2.21774125212422	0.0265742601675505	0.42020368735964	-4.47029
SNX3	-1.23593	-1.7422e-15	-2.21689	0.0266323979092745	0.42020368735964	-4.47041
CCNH	-1.23592	3.41607084500048e-16	-2.21687	0.0266337194752031	0.42020368735964	-4.47042
MTG1	1.23548751834083	2.30584782037533e-16	2.21610128223591	0.0266863497938297	0.42020368735964	-4.47053
CCDC115	-1.23536	1.02482125350014e-15	-2.21587	0.0267023649430327	0.42020368735964	-4.47056
DLST	1.23522991724588	2.64745490487537e-16	2.21563922162554	0.0267180046221072	0.42020368735964	-4.47059
PDCD7	1.23466792977308	-8.79638e-16	2.21463118136567	0.0267871759603685	0.42020368735964	-4.47074
COL4A1	1.23445468464174	-6.40513e-16	2.21424868231004	0.0268134633428665	0.42020368735964	-4.47079
RASGRP2	-1.23442	-6.83214e-17	-2.21419	0.0268178352124422	0.42020368735964	-4.4708
PDE4B	-1.23415	-2.39125e-16	-2.21371	0.0268507545600786	0.42020368735964	-4.47087
PRSS23	1.2330543852379	1.87883896475026e-16	2.21173695697224	0.0269866365802497	0.42020368735964	-4.47115
RPN2	1.23284699702453	1.81905772496276e-15	2.21136496350508	0.0270123659276093	0.42020368735964	-4.4712
ATP1B3	-1.23254	-3.52282e-16	-2.21081	0.0270506585150669	0.42020368735964	-4.47128
MBOAT1	1.23245288205732	7.68615940125108e-16	2.21065803715317	0.0270613196483988	0.42020368735964	-4.4713
CTTN	1.23185866336999	2.22044604925031e-16	2.20959218357279	0.0271352733761131	0.42020368735964	-4.47145
TJP2	1.2315120767586	-4.18469e-16	2.20897050911434	0.0271784884437178	0.42020368735964	-4.47154
ANKHD1	-1.2313	-4.6117e-16	-2.20859	0.0272049643735874	0.42020368735964	-4.47159
TMEM91	-1.23066	-5.08141e-16	-2.20744	0.0272851801209347	0.42020368735964	-4.47176
EFCAB2	1.23052318850473	9.9066054505014e-16	2.20719673439393	0.0273021172485919	0.42020368735964	-4.47179
DAG1	1.22979232876079	3.41607084500048e-17	2.2058857869407	0.0273937994202732	0.42020368735964	-4.47198
BORCS5	-1.22944	6.91754346112598e-16	-2.20525	0.0274384287366918	0.42020368735964	-4.47207
ABCA13	1.22932993437399	1.05898196195015e-15	2.2050563873893	0.0274519412354955	0.42020368735964	-4.4721
SPHK2	1.2292191431142	-3.41607e-17	2.20485766045013	0.0274658880106104	0.42020368735964	-4.47212
CHST9	1.22853620400536	-3.41607e-17	2.20363266852401	0.0275519937160402	0.42020368735964	-4.4723
HIRA	1.22851411023755	4.86790095412569e-16	2.20359303880178	0.0275547832061556	0.42020368735964	-4.4723
LRIG3	1.22843877179305	-3.07446e-16	2.20345790378748	0.0275642970345557	0.42020368735964	-4.47232
KCND3	1.22744272129292	4.9533027252507e-16	2.20167128210354	0.0276903460783258	0.42020368735964	-4.47257
TSPAN7	1.22698861764814	-4.7825e-16	2.20085675370521	0.0277479771484387	0.42020368735964	-4.47269
SLC35E4	-1.22691	5.6365168942508e-16	-2.20072	0.0277577483091167	0.42020368735964	-4.47271
PBX1	1.22649356708948	5.80732043650082e-16	2.19996877858485	0.0278109226750724	0.42020368735964	-4.47282
CCNC	-1.22644	-1.15292e-16	-2.19987	0.0278177984245786	0.42020368735964	-4.47283
CLDN4	1.22635659273986	1.70803542250024e-16	2.19972308688231	0.0278283606523709	0.42020368735964	-4.47285
IRX2	1.22575620474816	-4.7825e-16	2.19864616738414	0.0279049063206768	0.42020368735964	-4.473
SERINC2	1.2257460100377	-9.39419e-17	2.19862788107159	0.0279062076474597	0.42020368735964	-4.47301
CD83	-1.22543	-6.83214e-16	-2.19807	0.0279461211313306	0.42020368735964	-4.47308
PBXIP1	1.22528402779576	7.60075763012607e-16	2.19779922078686	0.0279652333420997	0.42020368735964	-4.47312
NDUFA6	-1.22507	1.14438373307516e-15	-2.19741	0.0279929421292139	0.42020368735964	-4.47318
MICAL2	1.22461804390675	1.19562479575017e-16	2.19660464153902	0.0280505129338197	0.42020368735964	-4.47329
P4HTM	1.22420209047539	-3.75768e-16	2.19585854340455	0.0281038896358387	0.42020368735964	-4.4734
IRAK3	-1.22364	-2.73286e-16	-2.19485	0.0281762206484632	0.42020368735964	-4.47354
RBM43	1.22360770257891	8.79638242587624e-16	2.19479238631273	0.0281803156292917	0.42020368735964	-4.47355
PCDH1	1.22340268082318	-3.41607e-16	2.19442463757466	0.0282067186999442	0.42020368735964	-4.4736
HNRNPD	1.22308241211565	1.19562479575017e-16	2.1938501696963	0.0282480061408037	0.42020368735964	-4.47368
UNC5C	1.22298049167719	-5.46571e-16	2.19366735440192	0.0282611561327392	0.42020368735964	-4.47371
ZC3HAV1	1.22283889471298	1.07606231617515e-15	2.19341337108822	0.0282794340290017	0.42020368735964	-4.47374
CST3	-1.22275	-4.31279e-16	-2.19326	0.0282904035867032	0.42020368735964	-4.47376
INSR	1.2221701568507	-1.19562e-16	2.1922138520222	0.0283658950722484	0.42020368735964	-4.47391
TTC28	1.22205546600784	4.69709741187566e-17	2.19200813037778	0.0283807462947175	0.42020368735964	-4.47394
PAPOLA	-1.22204	-3.68295e-17	-2.19198	0.0283830691268829	0.42020368735964	-4.47394
RABL2B	1.22186201599006	-1.87884e-16	2.19166113793465	0.028405811156387	0.42020368735964	-4.47399
PHB2	1.2214150791354	9.2233912815013e-16	2.19085946465024	0.0284637926451911	0.42020368735964	-4.4741
IFT81	1.22130536563017	2.39124959150034e-16	2.19066267088583	0.0284780414445652	0.42020368735964	-4.47413
ROBO1	1.22124552154452	1.87883896475026e-16	2.1905553281948	0.0284858161525975	0.42020368735964	-4.47414
PNRC2	-1.22122	-8.02777e-16	-2.19051	0.0284888967715958	0.42020368735964	-4.47415
CCDC66	1.22120220279557	4.9533027252507e-16	2.19047762709813	0.028491445094629	0.42020368735964	-4.47415
BLOC1S1	-1.22118	-6.66134e-16	-2.19044	0.0284944274401452	0.42020368735964	-4.47416
CLMP	1.22113819977449	2.56205313375036e-16	2.19036282449999	0.0284997635541469	0.42020368735964	-4.47417
FAM3C	1.22103520380298	-2.13504e-16	2.19017808001562	0.0285131543115393	0.42020368735964	-4.4742
CEP170B	1.22101241279453	-4.44089e-16	2.19013719964872	0.0285161181583089	0.42020368735964	-4.4742
MPZL2	1.22073543814077	-5.12411e-17	2.18964038857112	0.028552158420788	0.42020368735964	-4.47427
ZFAND5	-1.21997	-6.19163e-17	-2.18826	0.0286525857780757	0.42020368735964	-4.47447
BNIPL	1.21974900285087	6.83214169000096e-17	2.18787101374673	0.0286808333802174	0.42020368735964	-4.47452
ZBED3	1.21950872481665	5.92474787179771e-16	2.18744002561304	0.0287122518338913	0.42020368735964	-4.47458
PTPRT	1.21950586904823	-1.24687e-15	2.18743490320431	0.0287126254287274	0.42020368735964	-4.47458
JUP	1.21891873660029	-5.63652e-16	2.18638176025352	0.0287895237099077	0.42020368735964	-4.47473
PLS1	1.21891399916366	-1.53723e-16	2.18637326268536	0.0287901449049272	0.42020368735964	-4.47473
NFIC	1.21816203474502	-4.09929e-16	2.18502445965206	0.0288888924362541	0.42020368735964	-4.47492
SYTL2	1.21771234528433	-6.66134e-16	2.1842178490019	0.0289480846116857	0.42020368735964	-4.47503
C14ORF93	1.21763756603958	1.87883896475026e-16	2.1840837170275	0.0289579378465742	0.42020368735964	-4.47505
MET	1.21715157076549	-7.34455e-16	2.18321198442473	0.0290220450530561	0.42020368735964	-4.47518
PDS5B	1.21715116130774	1.12730337885016e-15	2.18321124997793	0.029022099115727	0.42020368735964	-4.47518
CDH11	1.21702009983018	-5.38031e-16	2.18297616422906	0.029039408246369	0.42020368735964	-4.47521
HYAL2	1.21685106443994	-7.34455e-16	2.18267	0.0290617456654106	0.42020368735964	-4.47525
TCTN1	1.21655755991453	-3.07446e-16	2.18214650364169	0.0291005663661645	0.42020368735964	-4.47532
INHBB	1.21639896485863	6.49053460550092e-16	2.18186203075019	0.0291215616841917	0.42020368735964	-4.47536
ITGA3	1.21613804725984	9.39419482375133e-16	2.18139402130724	0.0291561311519082	0.42020368735964	-4.47543
PPAN	1.21597875298601	-8.28397e-16	2.18110829422442	0.0291772537095549	0.42020368735964	-4.47547
WSB1	1.21557051503847	-3.67228e-16	2.18038	0.0292314465411246	0.42020368735964	-4.47557
LRWD1	1.21534091825178	2.56205313375036e-16	2.17996420628229	0.0292619631266319	0.42020368735964	-4.47563
JADE1	1.21449164100144	2.39124959150034e-16	2.17844085264617	0.0293750821610977	0.42020368735964	-4.47584
C1QTNF7	1.21439873292069	2.39124959150034e-16	2.17827420287122	0.029387479802658	0.42020368735964	-4.47587
ARID1A	1.21420665314754	4.09928501400058e-16	2.17793	0.0294131251749902	0.42020368735964	-4.47592
JCHAIN	1.21414776691452	5.12410626750072e-17	2.17782404365892	0.0294209911766629	0.42020368735964	-4.47593
TSHZ3	1.21355299599536	1.02482125350014e-16	2.17675719953703	0.0295005419592032	0.42020368735964	-4.47608
FAP	1.21346266168772	-8.54018e-17	2.17659516635417	0.0295126403687033	0.42020368735964	-4.4761
ZMYND8	1.21326028251914	4.78249918300067e-16	2.17623215764034	0.0295397603582615	0.42020368735964	-4.47615
RRP15	1.21277	1.02482125350014e-16	2.17535166312303	0.0296056302194629	0.42020368735964	-4.47628
AGR3	1.21274053866983	-1.53723e-16	2.1752998900182	0.0296095072985138	0.42020368735964	-4.47628
IFNGR2	-1.21241	1.70803542250024e-16	-2.17471	0.0296537965101781	0.42020368735964	-4.47637
STMN1	-1.21181	1.87883896475026e-16	-2.17363	0.0297350823075058	0.42020368735964	-4.47652
PFDN5	-1.21097	-1.46891e-15	-2.17212	0.0298482267753124	0.42020368735964	-4.47673
TRAPPC5	-1.21095	3.92848147175055e-16	-2.17208	0.0298511698350832	0.42020368735964	-4.47673
FKBP9	1.21005169818696	-1.11022e-16	2.17048	0.029972601745051	0.42020368735964	-4.47696
S100A13	1.20969673023314	1.04190160772515e-15	2.16984019278995	0.0300208205638763	0.42020368735964	-4.47705
FAM160B1	-1.20881	1.19562479575017e-16	-2.16825	0.0301414788532641	0.42020368735964	-4.47727
WDR18	-1.20873	3.84307970062554e-16	-2.1681	0.0301526347935242	0.42020368735964	-4.47729
CHL1	1.20862491979475	-1.36643e-16	2.16791768005587	0.0301668200239069	0.42020368735964	-4.47731
CA2	-1.20822	5.38031158087576e-16	-2.16719	0.0302225521684092	0.42020368735964	-4.47742
ELAC1	-1.20781	6.23432929212588e-16	-2.16646	0.0302779245689401	0.42020368735964	-4.47752
EGR3	1.20770592572607	9.73580190825137e-16	2.16626927494959	0.0302924886737454	0.42020368735964	-4.47754
CITED2	-1.20764	5.12410626750072e-17	-2.16615	0.0303016277367464	0.42020368735964	-4.47756
LPP	1.20704164719321	-4.44089e-16	2.16507775460918	0.0303836058604113	0.42020368735964	-4.47771
SCAMP4	1.20700290952506	1.19562479575017e-16	2.16500827062427	0.0303889266535284	0.42020368735964	-4.47772
SHC2	1.20698578440616	-1.02482e-16	2.16497755319703	0.030391279120853	0.42020368735964	-4.47772
CES1	-1.20686	-1.19562e-16	-2.16475	0.0304088163982951	0.42020368735964	-4.47776
PXDC1	1.20619675897966	1.87883896475026e-16	2.16356227361435	0.0304998368620981	0.42020368735964	-4.47792
USP22	1.20610714702328	-2.39125e-16	2.16340153611721	0.0305121871233196	0.42020368735964	-4.47794
FAM114A2	1.20606680416133	-3.33067e-16	2.16332917288669	0.0305177485522353	0.42020368735964	-4.47795
NBR1	1.20578003991195	-6.83214e-16	2.16281480215343	0.0305573052759169	0.42020368735964	-4.47802
MYO1E	1.20561749005025	-1.14438e-15	2.16252323550334	0.030579747216349	0.42020368735964	-4.47806
HBB	-1.20522	2.73285667600039e-16	-2.16181	0.0306344861084235	0.42020368735964	-4.47816
THEMIS2	-1.20518	9.73580190825137e-16	-2.16175	0.0306395947587914	0.42020368735964	-4.47817
2025-03-09	1.2051313680945	-8.54018e-18	2.16165127567091	0.0306469466178917	0.42020368735964	-4.47819
NCF4	-1.20478	5.46571335200077e-16	-2.16103	0.0306951261917564	0.42020368735964	-4.47827
CXCL2	-1.20359	-1.96424e-16	-2.15889	0.0308605749536521	0.42020368735964	-4.47857
SCD5	1.20296959190689	-1.24687e-15	2.1577736849141	0.030947319296157	0.42020368735964	-4.47872
ADAM10	1.20287460006318	1.28102656687518e-16	2.15760329748119	0.0309605759061155	0.42020368735964	-4.47875
LRP8	-1.20287	1.70803542250024e-16	-2.1576	0.0309612099522531	0.42020368735964	-4.47875
TP53	1.20273615551114	-4.8252e-16	2.15735496866786	0.0309799052985095	0.42020368735964	-4.47878
SDC4	-1.2026	-6.83214e-17	-2.15712	0.0309982553936288	0.42020368735964	-4.47881
IQCK	1.20221094819383	4.2700885562506e-16	2.15641290119082	0.0310533280661776	0.42020368735964	-4.47891
PCOLCE	1.20193266641681	-8.11317e-16	2.15591374551849	0.0310922917122475	0.42020368735964	-4.47898
C1S	1.20171802554965	6.74673991887595e-16	2.15552874292326	0.0311223733267983	0.42020368735964	-4.47903
HMG20B	1.20152826548238	-2.39125e-16	2.15518836916622	0.0311489887311257	0.42020368735964	-4.47908
TUBB4B	1.20151628026655	-1.53723e-16	2.15516687121356	0.031150670411474	0.42020368735964	-4.47909
TAGLN2	1.20114381024764	-1.60555e-15	2.15449876953367	0.0312029716088062	0.42020368735964	-4.47918
BLOC1S4	-1.20114	3.13851508884419e-16	-2.15449	0.0312038180753922	0.42020368735964	-4.47918
SGCB	1.20100605452084	-3.58687e-16	2.15425167627026	0.0312223339613716	0.42020368735964	-4.47921
SYNGAP1	1.20022243805332	-9.39419e-17	2.15284609876935	0.0313326719639215	0.42020368735964	-4.47941
PURA	1.19988089885972	4.44089209850063e-16	2.15223347789408	0.0313808673588299	0.42020368735964	-4.47949
UBP1	1.19980144989185	-1.28103e-16	2.15209096980965	0.0313920877022768	0.42020368735964	-4.47951
CANT1	1.1996286558583	-9.00989e-16	2.15178102812782	0.0314165027775369	0.42020368735964	-4.47955
TYMS	1.19955378155977	1.36642833800019e-16	2.15164672565489	0.0314270872607667	0.42020368735964	-4.47957
NME5	1.19934129891874	-2.56205e-16	2.15126559428266	0.0314571411835222	0.42020368735964	-4.47962
DCUN1D3	1.19851591888706	-6.02082e-16	2.14978510522924	0.0315741184061967	0.42020368735964	-4.47983
CDC23	-1.1982	3.41607084500048e-17	-2.14922	0.0316189111490925	0.42020368735964	-4.47991
TCF12	1.19787054290662	-2.56205e-16	2.14862749050911	0.031665844229816	0.42020368735964	-4.47999
EPB41L1	1.19683657805946	-3.58687e-16	2.14677286163625	0.0318132756322663	0.42020368735964	-4.48025
FAM214A	1.19642243949528	-4.52629e-16	2.1460300188398	0.0318724918523819	0.42020368735964	-4.48035
HEXIM1	1.19525549271695	-3.92848e-16	2.14393685948904	0.0320398580121987	0.42020368735964	-4.48064
INSIG1	-1.19521	-8.19857e-16	-2.14386	0.0320458820080718	0.42020368735964	-4.48065
ANKS6	1.19517791388175	0	2.14379770587266	0.0320510112004557	0.42020368735964	-4.48066
SYT15	1.19503257739411	-1.45183e-16	2.14353701495363	0.0320719145830368	0.42020368735964	-4.48069
RAMP3	1.19471287018489	-1.19562e-16	2.1429635542381	0.0321179383960879	0.42020368735964	-4.48077
SHISA4	1.19445361578139	-1.36643e-16	2.1424985280784	0.0321553012070146	0.42020368735964	-4.48083
TRIP6	1.19442561473277	-3.58687e-16	2.14244830243158	0.0321593388452231	0.42020368735964	-4.48084
SPATA18	1.19415833020516	3.92848147175055e-16	2.14196887259066	0.0321979020688184	0.42020368735964	-4.48091
INPP5E	1.19403122075358	-4.44089e-16	2.14174087561421	0.0322162550400991	0.42020368735964	-4.48094
CCDC14	1.19384686514723	5.48706379478202e-16	2.14141019587074	0.0322428895498959	0.42020368735964	-4.48098
EML4	-1.19361	1.72938586528149e-16	-2.14099	0.0322768128503924	0.42020368735964	-4.48104
SLC35B4	1.1934333118251	2.22044604925031e-16	2.14066840282644	0.0323027057147304	0.42020368735964	-4.48109
SCAF1	1.19313831903102	-1.70804e-17	2.14013927250378	0.0323454314174636	0.42020368735964	-4.48116
BMP5	1.19269032370041	-1.19562e-16	2.13933570062478	0.0324104100580439	0.42020368735964	-4.48127
LAMP3	-1.19214	-3.41607e-16	-2.13835	0.0324901122666029	0.42020368735964	-4.4814
CRYAB	-1.19203	1.87883896475026e-16	-2.13816	0.032505699677082	0.42020368735964	-4.48143
RBM6	1.19176868274763	-2.56205e-17	2.13768254778681	0.0325444394849751	0.42020368735964	-4.4815
PLXNB2	1.19168054981748	-2.39125e-16	2.13752446322779	0.0325572810310843	0.42020368735964	-4.48152
CD200	1.19162764291956	1.87883896475026e-16	2.13742956381151	0.0325649919977452	0.42020368735964	-4.48153
SH3GL1	1.19115266449191	-5.46571e-16	2.13657759219145	0.0326342882720123	0.42020368735964	-4.48165
MCTP1	1.19092253971157	5.12410626750072e-17	2.1361648160094	0.0326679073769364	0.42020368735964	-4.48171
NUP214	-1.19083	3.75767792950053e-16	-2.13601	0.0326807551135506	0.42020368735964	-4.48173
KIAA1324	1.19060932265709	-6.83214e-17	2.13560299672289	0.0327137131510926	0.42020368735964	-4.48178
FOS	-1.19045	-2.00694e-16	-2.13532	0.0327367408918176	0.42020368735964	-4.48182
ZNF346	-1.19032	3.41607084500048e-16	-2.13508	0.0327564898621693	0.42020368735964	-4.48185
ATF3	1.19017862314683	-8.54018e-16	2.13483044845934	0.0327767897095517	0.42020368735964	-4.48189
PEAR1	1.18978106179197	0	2.13411734030147	0.0328351055397578	0.42020368735964	-4.48199
TRIM68	1.18978106179197	0	2.13411734030147	0.0328351055397578	0.42020368735964	-4.48199
PRR5	-1.18953	-5.34829e-16	-2.13366	0.0328722005975801	0.42020368735964	-4.48205
FGFR1OP2	-1.1888	-1.70804e-16	-2.13236	0.0329789104831748	0.42020368735964	-4.48223
SH3GLB2	1.18870725847429	3.41607084500048e-17	2.13219125292798	0.0329930593437384	0.42020368735964	-4.48225
FOXP1	1.1885064449275	-1.02482e-16	2.13183105247923	0.0330226706004391	0.42020368735964	-4.4823
HIST1H1D	-1.18809	4.09928501400058e-16	-2.13108	0.0330847772488344	0.42020368735964	-4.4824
CLEC11A	1.18806764143354	-4.27009e-16	2.13104396805208	0.0330874541890816	0.42020368735964	-4.48241
AHDC1	1.18782398815477	-2.73286e-16	2.13060692572225	0.0331234733531584	0.42020368735964	-4.48247
MED9	-1.18772	-1.28103e-17	-2.13042	0.0331388328301198	0.42020368735964	-4.48249
AFF4	1.18733568617226	1.15292391018766e-16	2.1297310555629	0.0331957598655404	0.42020368735964	-4.48259
SIGLEC10	-1.1871	-2.00694e-16	-2.12931	0.033230602548422	0.42020368735964	-4.48264
DLG1	1.18675151338906	-1.53723e-16	2.12868322138029	0.0332824160829499	0.42020368735964	-4.48273
CLEC4E	-1.18651	-6.91754e-16	-2.12825	0.0333179529341376	0.42020368735964	-4.48279
UNC5B	1.18641853521797	2.56205313375036e-16	2.12808595646184	0.0333318966388973	0.42020368735964	-4.48281
TMEM134	1.18629233569599	2.73285667600039e-16	2.12785959163148	0.0333506663292999	0.42020368735964	-4.48284
MOK	1.18598048578168	7.17374877450101e-16	2.1273002245924	0.0333970866434252	0.42020368735964	-4.48292
SF3B6	-1.1858	1.28956674398768e-15	-2.12697	0.0334244250931333	0.42020368735964	-4.48296
GANAB	1.18568814390499	1.28102656687518e-16	2.12677584923597	0.0334406532850522	0.42020368735964	-4.48299
RAB18	-1.18556	4.2273876706881e-16	-2.12654	0.0334605000198939	0.42020368735964	-4.48302
FGF7	1.18526787392483	-1.70804e-16	2.12602200848235	0.0335033697713052	0.42020368735964	-4.48309
PM20D2	1.18508514648206	-4.9533e-16	2.12569424918554	0.0335306693810337	0.42020368735964	-4.48314
SLC16A7	1.18506266773115	-5.63652e-16	2.12565392891685	0.0335340290364211	0.42020368735964	-4.48314
UBE2L3	-1.18505	7.51535585900106e-16	-2.12563	0.0335362536082699	0.42020368735964	-4.48315
ASAP3	1.18497588785718	7.088347003376e-16	2.12549827134271	0.0335470017858549	0.42020368735964	-4.48317
JAG1	1.18493860109321	5.29490980975075e-16	2.12543138985324	0.0335525771137919	0.42020368735964	-4.48318
SLC4A1AP	-1.18485	3.07446376050043e-16	-2.12527	0.0335659756364027	0.42020368735964	-4.4832
INPP5B	1.1848187049117	-2.47665e-16	2.12521633136206	0.0335705100414466	0.42020368735964	-4.4832
PRG4	1.18477888782197	1.79343719362525e-16	2.12514491121229	0.033576467315233	0.42020368735964	-4.48321
RBSN	1.18465747135551	5.29490980975075e-16	2.12492712577696	0.0335946387446696	0.42020368735964	-4.48324
IFI30	-1.1844	-4.09929e-16	-2.12447	0.0336331917709265	0.42020368735964	-4.48331
TM9SF1	1.18377610329012	4.2700885562506e-17	2.12334621065574	0.0337267983620535	0.42020368735964	-4.48346
GCA	-1.18372	8.71098065475123e-16	-2.12324	0.0337356242530986	0.42020368735964	-4.48347
TMEM190	1.18345539354094	-8.71098e-16	2.12277095167835	0.0337749984402009	0.42020368735964	-4.48354
KIF7	1.18344557320161	-1.62263e-16	2.1227533368775	0.0337764752866793	0.42020368735964	-4.48354
EFS	1.18329886845894	-6.31973e-16	2.12249019171132	0.0337985442749725	0.42020368735964	-4.48358
ANKRD27	-1.18311	1.36642833800019e-16	-2.12214	0.0338276407796033	0.42020368735964	-4.48362
HAUS4	-1.183	8.71098065475123e-16	-2.12195	0.0338442177518692	0.42020368735964	-4.48365
NUDT16	1.18297269925771	8.24127091356366e-16	2.12190514008243	0.0338476545243998	0.42020368735964	-4.48366
CUL1	1.18268924557485	-6.83214e-17	2.12139670753194	0.033890382775705	0.42020368735964	-4.48373
PLSCR4	1.1823084394519	-3.84308e-16	2.12071365333283	0.0339478586768793	0.42020368735964	-4.48382
GNPTAB	-1.18229	-1.19562e-16	-2.12068	0.0339507486264221	0.42020368735964	-4.48382
ERF	1.18181346969872	-2.56205e-16	2.11982582315373	0.0340226900843055	0.42020368735964	-4.48394
ATP8B2	1.18142373610329	2.22044604925031e-16	2.11912675569434	0.0340817106741589	0.42020368735964	-4.48403
CSF3R	-1.18102	9.2233912815013e-16	-2.1184	0.034143306472884	0.42020368735964	-4.48413
RAD9A	1.1804800097961	9.39419482375132e-17	2.1174339882253	0.0342249896228538	0.42020368735964	-4.48427
SLCO4A1	1.18030192385302	-8.02777e-16	2.11711455441399	0.0342520847451236	0.42020368735964	-4.48431
RAP1A	-1.17998	-7.00295e-16	-2.11654	0.0343012335508978	0.42020368735964	-4.48439
NIT1	-1.17977	-4.18469e-16	-2.11616	0.0343333348823814	0.42020368735964	-4.48444
RIC3	1.17943282785087	1.53723188025022e-16	2.11555565176532	0.0343845776867325	0.42020368735964	-4.48452
ZNF703	1.17940775738016	1.02482125350014e-16	2.11551068271346	0.0343884061477987	0.42020368735964	-4.48453
INTS5	1.17904391173221	-1.53723e-16	2.11485805061884	0.0344440092968461	0.42020368735964	-4.48462
BCKDK	-1.17844	-4.44089e-16	-2.11378	0.0345358520935615	0.42020368735964	-4.48476
SLC16A3	-1.17839	8.54017711250121e-16	-2.11369	0.0345437104724144	0.42020368735964	-4.48477
CEP41	1.17838593080634	8.54017711250121e-18	2.1136778263334	0.0345447574759578	0.42020368735964	-4.48478
UBA6	1.17802682127667	-6.91754e-16	2.11303368944221	0.0345998494259022	0.42020368735964	-4.48486
HVCN1	-1.1778	1.02482125350014e-16	-2.11263	0.0346346245156058	0.42020368735964	-4.48492
DPCD	1.17756406795317	2.73285667600039e-16	2.11220364606391	0.0346709523000534	0.42020368735964	-4.48498
KCNN4	1.17742431419129	-2.39125e-16	2.11195296891315	0.0346924502367783	0.42020368735964	-4.48501
CDH1	1.17735172852728	-2.22045e-16	2.11182277157753	0.0347036203813228	0.42020368735964	-4.48503
COL21A1	1.17702399021526	-1.87884e-16	2.11123490542532	0.0347540939988263	0.42020368735964	-4.48511
CMIP	1.17678340636242	3.41607084500048e-17	2.11080336874296	0.0347911852108674	0.42020368735964	-4.48517
ANKLE2	1.17666467765946	2.56205313375036e-16	2.11059040436496	0.0348095022669034	0.42020368735964	-4.4852
CMTM7	-1.17655	-5.55112e-17	-2.11038	0.0348277772745316	0.42020368735964	-4.48522
POLB	-1.17616	-1.11022e-15	-2.10969	0.0348873205018965	0.42020368735964	-4.48532
LUC7L2	1.17607810399909	-1.87884e-16	2.10953826371475	0.0349001177290351	0.42020368735964	-4.48534
PRKCSH	1.17570960393054	-8.79638e-16	2.10887728295834	0.0349571475549014	0.42020368735964	-4.48543
TOB2	1.1754578880401	-2.81826e-16	2.10842577867417	0.0349961493447043	0.42020368735964	-4.48549
CEP76	1.17526015356542	6.83214169000096e-17	2.10807110117531	0.03502681310347	0.42020368735964	-4.48554
ZNF609	1.17465822896615	-5.12411e-17	2.10699142545504	0.0351202980469841	0.42020368735964	-4.48568
ERMAP	1.17382651029068	-2.73286e-16	2.10549956673869	0.0352498227348596	0.42020368735964	-4.48588
TAF12	-1.17372	4.69709741187566e-16	-2.10532	0.0352657100396229	0.42020368735964	-4.48591
JAM2	1.17332022405581	4.78249918300067e-16	2.10459143811932	0.0353288668354598	0.42020368735964	-4.48601
KCNK1	1.17310627607674	3.15986553162545e-16	2.10420767836157	0.0353623149707083	0.42020368735964	-4.48606
PARP14	1.17304870391553	5.12410626750072e-16	2.10410441083489	0.0353713202830725	0.42020368735964	-4.48607
CMC2	-1.17277	-1.22979e-15	-2.1036	0.0354154709824312	0.42020368735964	-4.48614
ZAP70	-1.17275	-4.01388e-16	-2.10357	0.035417961616017	0.42020368735964	-4.48615
RPA3	1.17256294075327	-1.15292e-15	2.10323309457245	0.0354473802456505	0.42020368735964	-4.48619
MUC4	1.17247209941151	5.6365168942508e-16	2.10307015191949	0.0354616195053134	0.42020368735964	-4.48621
POLR2F	1.17240301528952	-6.66134e-16	2.10294623532053	0.0354724516165186	0.42020368735964	-4.48623
SAMD5	1.17240284303738	-5.55112e-16	2.10294592635085	0.0354724786284852	0.42020368735964	-4.48623
APOL2	1.17225310091594	-3.67228e-16	2.10267733302037	0.035495967295225	0.42020368735964	-4.48627
SYK	-1.17219	2.90366021825041e-16	-2.10257	0.0355052736510961	0.42020368735964	-4.48628
KRT15	1.17214279916562	-6.14893e-16	2.10247948411725	0.0355132778009395	0.42020368735964	-4.48629
TASP1	1.17210638138003	8.96718596812626e-16	2.10241416131944	0.0355189947067005	0.42020368735964	-4.4863
STAT1	1.1720809478675	-1.45183e-16	2.10236854107733	0.0355229877543185	0.42020368735964	-4.48631
TMCO6	1.1720425891112	-4.6117e-16	2.10229973674886	0.0355290107825677	0.42020368735964	-4.48632
GRB10	1.17182023048389	3.58687438725051e-16	2.10190089076153	0.0355639423318983	0.42020368735964	-4.48637
ZNF512	1.1716385878236	9.65040013712636e-16	2.10157507724547	0.035592499323849	0.42020368735964	-4.48642
GBP3	1.17159565074955	6.74673991887595e-16	2.10149806076134	0.0355992525435313	0.42020368735964	-4.48643
DNAH6	1.1714609170584	-2.13504e-16	2.1012563881412	0.0356204507962112	0.42020368735964	-4.48646
SEMA5A	1.17088119871397	4.2700885562506e-16	2.10021654391181	0.0357117833549616	0.420846799516048	-4.4866
EGFL6	1.17047450864525	-1.19562e-16	2.09948706152581	0.0357759750782932	0.421142346279325	-4.4867
SHROOM3	1.16994780288224	-2.56205e-16	2.09854230627782	0.0358592562451587	0.421142346279325	-4.48682
PTPRS	1.16890732771168	-5.80732e-16	2.09667599979929	0.0360242590840363	0.421142346279325	-4.48708
YIPF3	1.1687857478047	-7.85696e-16	2.09645792119976	0.036043581901265	0.421142346279325	-4.48711
PCYOX1L	1.16863690630356	8.71098065475123e-16	2.09619094331723	0.0360672494615521	0.421142346279325	-4.48714
NDRG4	-1.16799	-3.67228e-16	-2.09502	0.0361709565556185	0.421142346279325	-4.4873
SPAG8	1.16786707019816	-5.80732e-16	2.09481008373349	0.0361898741127657	0.421142346279325	-4.48733
RAB40C	1.16761392257411	-7.00295e-16	2.09435601134028	0.0362302747307602	0.421142346279325	-4.48739
KLRG1	-1.16747	4.9533027252507e-16	-2.0941	0.0362526324558751	0.421142346279325	-4.48742
IRF3	1.1674606215797	-7.85696e-16	2.09408103443825	0.0362547591989042	0.421142346279325	-4.48743
URB1	1.16729649492631	-2.39125e-16	2.09378663948756	0.0362809883187159	0.421142346279325	-4.48747
CYC1	-1.1668	-6.49053e-16	-2.0929	0.0363596371969575	0.421142346279325	-4.48758
KCNQ3	1.16657836608366	8.54017711250121e-16	2.09249852752741	0.0363959429483981	0.421142346279325	-4.48764
BCAS4	1.16646498990488	3.07446376050043e-16	2.09229516400375	0.0364141200058541	0.421142346279325	-4.48767
ITGA1	1.16596274213438	4.69709741187566e-16	2.09139427920185	0.0364947360482106	0.421142346279325	-4.48779
COL7A1	1.16535594426322	6.83214169000096e-16	2.09030586226491	0.0365923362926436	0.421142346279325	-4.48793
NEIL1	1.16527265119428	-2.88231e-16	2.09015645899362	0.0366057508871573	0.421142346279325	-4.48795
VAV1	-1.16527	-6.61864e-16	-2.09015	0.0366059816400753	0.421142346279325	-4.48795
KDM5C	1.16508872373565	1.79343719362525e-16	2.08982654722126	0.0366353877887517	0.421142346279325	-4.488
KRT10	1.16505488957857	-8.02777e-16	2.08976585869323	0.0366408418352756	0.421142346279325	-4.48801
CBY1	1.16439902230772	5.29490980975075e-16	2.08858942568331	0.0367467040120461	0.421142346279325	-4.48816
DCTN2	1.1641204254751	8.35869834886055e-16	2.08808970489388	0.0367917505268547	0.421142346279325	-4.48823
ZNF227	-1.16408	-1.70804e-17	-2.08801	0.036798817120094	0.421142346279325	-4.48824
CYB5D1	1.16403429994437	8.11316825687614e-16	2.0879352210191	0.0368056857380273	0.421142346279325	-4.48825
ARHGAP21	1.16382682194514	2.56205313375036e-17	2.08756306650252	0.0368392743812332	0.421142346279325	-4.4883
MAD2L1BP	-1.16288	4.2700885562506e-17	-2.08586	0.0369936287501056	0.421142346279325	-4.48853
SESN2	-1.16276	-2.90366e-16	-2.08566	0.0370117783926955	0.421142346279325	-4.48856
RRP36	1.16272991690691	1.62263365137523e-16	2.0856	0.0370172866902135	0.421142346279325	-4.48857
DNMT3A	-1.16234	1.87883896475026e-16	-2.0849	0.0370803208869058	0.421142346279325	-4.48866
NOP56	1.16199974364934	-1.53723e-16	2.08428582533742	0.0371361892139887	0.421142346279325	-4.48874
RSBN1L	1.16195688902626	8.19857002800116e-16	2.08420895674608	0.0371431778169214	0.421142346279325	-4.48875
PNPLA8	-1.16171	1.07606231617515e-15	-2.08376	0.0371838822730671	0.421142346279325	-4.48881
FTO	1.16166547998622	3.24526730275046e-16	2.08368625462429	0.037190729627195	0.421142346279325	-4.48882
IFT22	1.16111579916797	-6.14893e-16	2.08270028888359	0.0372805670376285	0.421142346279325	-4.48895
SH3RF3	1.1611001794163	3.41607084500048e-16	2.08267227164247	0.0372831225578753	0.421142346279325	-4.48896
SF3A3	1.16057786535856	-8.62558e-16	2.08173539382225	0.0373686633524675	0.421142346279325	-4.48908
NF2	1.16009290871196	-4.01388e-16	2.08086552421176	0.0374482355196801	0.421142346279325	-4.4892
COX4I1	-1.16004	8.54017711250121e-16	-2.08077	0.0374570079375069	0.421142346279325	-4.48921
SKA2	1.15958987600554	-3.41607e-17	2.07996323146564	0.0375309259461701	0.421142346279325	-4.48932
SENP3	-1.15954	-4.6971e-16	-2.07987	0.037539305818237	0.421142346279325	-4.48933
IQSEC2	-1.1593	-3.58687e-16	-2.07945	0.0375780977648741	0.421142346279325	-4.48939
PERP	1.15908334321062	2.90366021825041e-16	2.07905466059006	0.0376143486856218	0.421142346279325	-4.48944
TMC5	1.15877508995688	5.12410626750072e-17	2.07850174490234	0.0376651932267015	0.421142346279325	-4.48951
TCTN3	1.15861049602625	-3.75768e-16	2.07820651179371	0.0376923659565985	0.421142346279325	-4.48955
RER1	1.15852622951308	5.33761069531325e-17	2.07805536244974	0.0377062839272172	0.421142346279325	-4.48957
ATAD1	1.1584104766287	-5.16681e-16	2.07784773581515	0.0377254095067901	0.421142346279325	-4.4896
SAMD11	1.15840396478996	-9.39419e-17	2.07783605549142	0.0377264856879086	0.421142346279325	-4.4896
NOS1AP	1.15826339025159	6.06352574987586e-16	2.07758390610901	0.0377497241526767	0.421142346279325	-4.48964
C3ORF70	1.15826339025159	6.06352574987586e-16	2.07758390610901	0.0377497241526767	0.421142346279325	-4.48964
ENTPD7	1.15826339025159	6.06352574987586e-16	2.07758390610901	0.0377497241526767	0.421142346279325	-4.48964
MTCL1	1.15826339025159	6.06352574987586e-16	2.07758390610901	0.0377497241526767	0.421142346279325	-4.48964
ZNF234	1.15826339025159	6.06352574987586e-16	2.07758390610901	0.0377497241526767	0.421142346279325	-4.48964
IL6ST	1.15816094367035	-8.79638e-16	2.07740014706922	0.0377666673312636	0.421142346279325	-4.48966
ANGPTL2	1.15811049403425	4.78249918300067e-16	2.07730965525801	0.0377750133463997	0.421142346279325	-4.48967
KLF3	-1.15786	1.42407453350958e-15	-2.07687	0.0378158316955062	0.421142346279325	-4.48973
ARPC3	-1.15778	1.16146408730016e-15	-2.07671	0.0378302567275873	0.421142346279325	-4.48975
RSPRY1	1.15719638144592	4.69709741187566e-17	2.07567000609198	0.0379265093755813	0.421142346279325	-4.48989
TAP2	1.15706471562995	-4.996e-16	2.07543383633771	0.0379483728932764	0.421142346279325	-4.48992
LRRFIP1	1.15692227752537	6.83214169000096e-16	2.07517834426554	0.0379720372532533	0.421142346279325	-4.48996
DNAL4	1.15685916189201	-2.04964e-16	2.07506513338001	0.0379825271608317	0.421142346279325	-4.48997
ZNF783	1.15684890403275	0	2.07504673379706	0.0379842322643674	0.421142346279325	-4.48998
TACR1	1.15642831876519	-2.30585e-16	2.07429232751058	0.0380541997532691	0.421509261026763	-4.49008
SLC2A10	1.15616910806667	2.22044604925031e-16	2.07382737974474	0.0380973759483654	0.421578997546723	-4.49014
GGPS1	-1.15443	-5.85002e-16	-2.07071	0.0383877836903115	0.423163230152687	-4.49055
ZNF44	-1.1542	9.07393818203253e-16	-2.07029	0.0384274632060246	0.423163230152687	-4.49061
EXD2	1.15375724723144	-2.13504e-16	2.06950121067368	0.0385011154990913	0.423163230152687	-4.49071
UQCRFS1	-1.15372	-2.92074e-15	-2.06943	0.0385080080488459	0.423163230152687	-4.49072
SELENBP1	1.15360274907922	-5.46571e-16	2.06922408642261	0.0385271015835139	0.423163230152687	-4.49075
MUC16	1.15347033243271	5.46571335200077e-16	2.06898656989916	0.038549385492496	0.423163230152687	-4.49078
PLRG1	1.1532992241768	9.05258773925128e-16	2.06867965200667	0.038578196891694	0.423163230152687	-4.49082
MECOM	1.15315629027578	5.12410626750072e-17	2.06842327062148	0.0386022782879496	0.423163230152687	-4.49086
RASSF5	-1.15292	5.97812397875084e-17	-2.068	0.0386424393696955	0.423163230152687	-4.49091
ITGA10	1.15251322794114	2.47665136262535e-16	2.06726980590154	0.038710779031802	0.423163230152687	-4.49101
INTS6	1.15251277875753	-2.22045e-16	2.06726900019823	0.0387108549108164	0.423163230152687	-4.49101
EVA1C	1.15148297246179	1.11022302462516e-16	2.06542183054368	0.0388851490861468	0.423163230152687	-4.49126
NUMA1	1.15096477185389	4.2700885562506e-16	2.06449233104283	0.0389731061133297	0.423163230152687	-4.49138
CD55	-1.15074	2.8182584471254e-16	-2.06409	0.0390111593593159	0.423163230152687	-4.49143
TBPL1	-1.15061	2.4980018054066e-16	-2.06386	0.0390333164398703	0.423163230152687	-4.49146
ZNF510	-1.15061	-3.58687e-16	-2.06385	0.0390341149461791	0.423163230152687	-4.49146
THRB	1.15049610571568	3.75767792950053e-16	2.06365168181374	0.0390528008673984	0.423163230152687	-4.49149
ZNF704	1.15034280291844	-1.36643e-16	2.06337670167797	0.0390788994038365	0.423163230152687	-4.49153
TMEM67	1.15018989349501	-7.34455e-16	2.06310242713915	0.0391049457264646	0.423163230152687	-4.49156
EHMT2	1.15006522553994	5.6365168942508e-16	2.06287880948945	0.0391261923561808	0.423163230152687	-4.49159
TSPAN14	1.15000136125388	2.98906198937542e-16	2.06276425574112	0.0391370802719941	0.423163230152687	-4.49161
PHF8	1.14931123980851	-3.41607e-17	2.06152638081542	0.0392548999934712	0.423163230152687	-4.49177
MYCT1	1.14930342748364	2.56205313375036e-16	2.06151236780201	0.0392562354604546	0.423163230152687	-4.49177
AP2A1	1.14919952474564	1.66533453693773e-16	2.06132599684519	0.0392740006380242	0.423163230152687	-4.4918
PLXDC1	1.14857956798536	3.07446376050043e-16	2.06021397673088	0.0393801421147542	0.423163230152687	-4.49195
MTERF2	1.14846413410043	1.79343719362525e-16	2.0600069222875	0.0393999321756771	0.423163230152687	-4.49197
MST1R	1.14785375791895	3.41607084500048e-16	2.05891208691414	0.0395047158816982	0.423163230152687	-4.49212
PROM1	1.1477683432916	-1.87884e-16	2.05875887819096	0.0395193979213302	0.423163230152687	-4.49214
DDX20	-1.14772	-7.42995e-16	-2.05868	0.0395268950539584	0.423163230152687	-4.49215
SCNN1B	1.1475787929131	3.41607084500048e-17	2.0584188805539	0.0395519965463309	0.423163230152687	-4.49218
GYPC	-1.14751	1.4518301091252e-15	-2.05829	0.0395643818558285	0.423163230152687	-4.4922
CX3CL1	1.1473659423922	3.41607084500048e-17	2.05803708931337	0.0395886295020011	0.423163230152687	-4.49223
SEMA3A	1.14736553260571	-2.51935e-16	2.05803635427691	0.0395887000566812	0.423163230152687	-4.49223
LGALS1	-1.14728	-3.41607e-16	-2.05789	0.0396029954762369	0.423163230152687	-4.49225
KLF2	-1.14688	7.36590275953229e-16	-2.05717	0.0396718046786334	0.423163230152687	-4.49235
PLPP2	1.14678893125657	4.09928501400058e-16	2.05700210102046	0.0396880817444229	0.423163230152687	-4.49237
KLHL7	-1.1466	-5.20951e-16	-2.05667	0.0397204768475314	0.423163230152687	-4.49242
ZNF90	-1.14638	1.53723188025022e-16	-2.05626	0.0397594135573026	0.423163230152687	-4.49247
SLC25A29	1.14588798877457	-7.85696e-16	2.05538607515216	0.0398437899720986	0.423163230152687	-4.49258
RBPMS	1.1458723644503	2.56205313375036e-16	2.05535804970915	0.039846494861332	0.423163230152687	-4.49259
EEF2KMT	-1.14578	4.9533027252507e-16	-2.05519	0.0398627518494919	0.423163230152687	-4.49261
WDR55	1.14555181207594	5.97812397875084e-16	2.05478307301591	0.0399020234151842	0.423163230152687	-4.49266
IRX5	1.14542884963667	2.22044604925031e-16	2.05456251456001	0.0399233413330653	0.423163230152687	-4.49269
CCDC17	1.14533822451261	2.73285667600039e-16	2.05439995973799	0.0399390591363051	0.423163230152687	-4.49272
MBTPS1	1.14531615772241	-1.70804e-16	2.05436037840566	0.0399428871419687	0.423163230152687	-4.49272
AKR7A2	1.14502904762663	-4.55298e-16	2.05384538732566	0.0399927215448064	0.423163230152687	-4.49279
SH3GLB1	-1.14465	1.70803542250024e-17	-2.05317	0.0400583877084157	0.423163230152687	-4.49288
INO80D	1.14445462765348	3.71497704393802e-16	2.05281504681622	0.0400925833723838	0.423163230152687	-4.49292
SDCBP	-1.14444	-3.07446e-16	-2.05279	0.0400950152546591	0.423163230152687	-4.49293
KLHDC8B	1.14439623704843	-2.13504e-16	2.05271031124198	0.0401027463018378	0.423163230152687	-4.49294
GTF3C5	1.14424829751762	4.9533027252507e-16	2.05244495122899	0.0401285050726545	0.423163230152687	-4.49297
CUTC	-1.14262	2.73285667600039e-16	-2.04952	0.0404129597183135	0.425770085290361	-4.49336
ELOVL1	1.14222849363203	-3.50147e-16	2.04882201703152	0.0404815931485597	0.426100452376782	-4.49345
OSBPL2	-1.14186	-3.97118e-16	-2.04815	0.0405469539849336	0.426395796689766	-4.49354
UMPS	1.14138318046818	3.07446376050043e-16	2.04730577380083	0.0406301449015527	0.426534536791648	-4.49365
STX4	-1.14136	-9.09529e-16	-2.04726	0.0406347747848923	0.426534536791648	-4.49366
CCNL2	1.14087022646885	-8.54018e-17	2.04638568517284	0.0407205143535452	0.42692259276996	-4.49377
PPP2R3A	1.14072324918347	7.51535585900106e-16	2.04612205114518	0.040746439393931	0.42692259276996	-4.49381
CCL15	1.13957846769832	-3.92848e-16	2.04406864981214	0.0409488444167612	0.427714200858585	-4.49408
RASEF	1.13957316125039	4.05658412843807e-16	2.04405913160504	0.0409497846123611	0.427714200858585	-4.49408
PAXBP1	1.13910058902257	5.97812397875084e-16	2.04321147599989	0.0410335882676755	0.427714200858585	-4.49419
TSPAN15	1.1390712495923	-1.70804e-17	2.04315884968997	0.0410387959665673	0.427714200858585	-4.4942
IFITM1	1.1390520529805	-2.22045e-16	2.04312441661363	0.0410422036355105	0.427714200858585	-4.4942
SCNN1A	1.13893913960598	6.66133814775094e-16	2.04292188322471	0.04106225220223	0.427714200858585	-4.49423
CEP164	1.13881720699049	0	2.04270317196982	0.0410839115162913	0.427714200858585	-4.49425
HS2ST1	1.13819236211204	1.70803542250024e-16	2.04158238400898	0.0411950568336663	0.428175677183592	-4.4944
ZMAT3	1.13795952450794	3.28796818831296e-16	2.04116474181889	0.0412365382981005	0.428175677183592	-4.49446
ENAH	1.13793667676528	2.04964250700029e-16	2.0411237596875	0.0412406106709067	0.428175677183592	-4.49446
PYROXD2	1.1367163271137	-6.5279e-16	2.03893481128657	0.0414586208945648	0.428808140343141	-4.49475
DENND5B	1.13671150853415	4.2700885562506e-17	2.03892616817187	0.0414594836437461	0.428808140343141	-4.49475
TM6SF1	-1.13666	2.41260003428159e-16	-2.03884	0.0414682530848209	0.428808140343141	-4.49476
SLC20A1	1.13636598281872	-1.1273e-15	2.03830639664877	0.0415213884145337	0.428808140343141	-4.49483
HK2	1.13636571950685	8.11316825687614e-16	2.03830592434472	0.0415214356196092	0.428808140343141	-4.49483
CCDC57	1.1363368910946	8.54017711250121e-17	2.03825421465084	0.0415266040906182	0.428808140343141	-4.49484
MVD	-1.13582	3.33066907387547e-16	-2.03733	0.0416186534365138	0.429125779062685	-4.49496
LIMK2	1.1355915916145	-9.22339e-16	2.03691736655729	0.0416604135283618	0.429125779062685	-4.49501
TAF2	1.13547391051798	5.12410626750072e-17	2.03670628127719	0.0416815750688605	0.429125779062685	-4.49504
KLC4	1.13532965898196	1.53723188025022e-16	2.0364475364423	0.0417075269476549	0.429125779062685	-4.49507
SDF2L1	-1.13477	1.70803542250024e-17	-2.03545	0.0418080327400872	0.429773041593468	-4.49521
PCMT1	-1.13445	9.65040013712636e-16	-2.03487	0.0418658888272883	0.429955011658567	-4.49528
SARNP	-1.13426	2.39124959150034e-16	-2.03452	0.0419009608072472	0.429955011658567	-4.49533
TCF25	1.13256032841054	-6.49053e-16	2.03148017178732	0.0422084075275646	0.43113019478379	-4.49572
USP47	1.13239773730144	1.17854444152517e-15	2.03118853115154	0.0422379723976578	0.43113019478379	-4.49576
LCN2	1.13225008844792	4.9533027252507e-16	2.03092369252813	0.0422648354092221	0.43113019478379	-4.4958
RHOD	1.13206209283734	-8.54018e-17	2.0305864836875	0.0422990599659089	0.43113019478379	-4.49584
LOXL1	1.13186468261143	1.70803542250024e-17	2.03023238779558	0.0423350236837264	0.43113019478379	-4.49589
MORN2	1.13106	-1.19562e-16	2.02878999822955	0.0424817872469225	0.43113019478379	-4.49608
IPO13	-1.13105	-3.86443e-16	-2.02877	0.0424833411973744	0.43113019478379	-4.49608
TRIM47	1.13030686776178	-1.36643e-16	2.02743812606929	0.0426197310736326	0.43113019478379	-4.49625
PIGK	1.13021629956918	-1.02482e-16	2.0272756733656	0.0426363330676896	0.43113019478379	-4.49627
PLVAP	1.12997577432491	-1.19562e-16	2.02684424180976	0.0426804501364823	0.43113019478379	-4.49633
RPGR	1.12985829639638	-5.63652e-16	2.02663352095327	0.0427020119300797	0.43113019478379	-4.49636
CCDC30	1.12941376745682	-4.9533e-16	2.02583616676044	0.0427836837560729	0.43113019478379	-4.49646
ORMDL2	1.1292826629362	7.96905276810269e-16	2.02560100380496	0.0428077963587379	0.43113019478379	-4.49649
MSI2	1.12925	-8.54018e-17	2.02554667452566	0.0428133686839534	0.43113019478379	-4.4965
DDX59	1.12915736383464	-8.54018e-16	2.02537625406408	0.0428308519714945	0.43113019478379	-4.49652
NEO1	1.12904338215289	-4.6117e-16	2.02517180444614	0.0428518342444289	0.43113019478379	-4.49655
MSH6	1.12897696473522	5.97812397875084e-16	2.02505267113054	0.0428640646751782	0.43113019478379	-4.49656
TALDO1	-1.12884	-1.75928e-15	-2.0248	0.0428895469124782	0.43113019478379	-4.49659
MGME1	-1.12878	4.14198589956308e-16	-2.0247	0.0429002448967291	0.43113019478379	-4.49661
ABCF2	1.12874923775423	2.15639472090655e-16	2.02464419589539	0.0429060218519781	0.43113019478379	-4.49662
LAMB1	1.12839845180481	-1.70804e-17	2.02401498905941	0.0429707197484368	0.43113019478379	-4.4967
SFT2D3	-1.12835	1.32372745243769e-16	-2.02393	0.0429798133990682	0.43113019478379	-4.49671
IL32	1.12827867721935	1.66533453693773e-15	2.02380014867577	0.0429928294868451	0.43113019478379	-4.49672
COMMD1	-1.12804	4.61169564075065e-16	-2.02338	0.0430365259340108	0.43113019478379	-4.49678
PDGFRA	1.12793560067874	-3.41607e-16	2.02318477025206	0.0430562127788383	0.43113019478379	-4.4968
LRP10	1.12784222365614	-4.44089e-16	2.02301727933335	0.0430734778240367	0.43113019478379	-4.49683
ALOX15B	1.12774291354844	-8.28397e-16	2.02283914620473	0.0430918462937664	0.43113019478379	-4.49685
PRR15L	1.12763254554043	-3.24527e-16	2.0226411784548	0.0431122678073682	0.43113019478379	-4.49688
PTPN14	1.12744518588492	2.56205313375036e-16	2.02230511033056	0.0431469538977762	0.43113019478379	-4.49692
RBM34	1.12742386088053	1.4091292235627e-16	2.02226685954383	0.0431509033128112	0.43113019478379	-4.49692
NEDD8	-1.12701	1.3835086922252e-15	-2.02153	0.0432274896904464	0.43113019478379	-4.49702
SYNPO	1.12691227684554	2.39124959150034e-16	2.02135	0.0432457408737548	0.43113019478379	-4.49704
TNKS1BP1	1.12683484037355	3.58687438725051e-16	2.02121032997035	0.0432601114003155	0.43113019478379	-4.49706
UTP20	1.12628948714735	7.68615940125108e-16	2.02023212665716	0.0433614314270355	0.431763521465543	-4.49719
CC2D2A	1.12591768323879	-4.27009e-17	2.01956521978333	0.0434306229725223	0.431764947636991	-4.49728
TUBA1C	1.12576299447304	4.09928501400058e-16	2.01928775362763	0.0434594375325113	0.431764947636991	-4.49731
ANKRD6	1.12568008080479	-6.83214e-16	2.01913903088962	0.0434748888750045	0.431764947636991	-4.49733
HS6ST1	1.12521060030446	8.71098065475123e-16	2.01829692093438	0.0435624662794555	0.432142554780091	-4.49744
DUSP6	1.1250710897413	-6.66134e-16	2.0180466800106	0.0435885194349965	0.432142554780091	-4.49747
HIF1AN	1.12473115253629	-5.80732e-16	2.01743693263176	0.0436520567399056	0.432397452854299	-4.49755
VILL	1.12401181194488	-5.63652e-16	2.01614664715067	0.0437867658623121	0.432632942277945	-4.49772
SLC35A2	1.12399924394835	-1.36643e-16	2.01612410386083	0.0437891225565098	0.432632942277945	-4.49772
SLFN12	1.12366659517855	7.25915054562602e-16	2.0155274297914	0.0438515383055425	0.432632942277945	-4.4978
PRIM2	1.12343925959183	-5.12411e-16	2.01511965660247	0.0438942370683437	0.432632942277945	-4.49785
APLNR	1.12330130744641	1.18708461863767e-15	2.01487221102183	0.0439201647107169	0.432632942277945	-4.49788
ITGB3	1.12330130744641	1.18708461863767e-15	2.01487221102183	0.0439201647107169	0.432632942277945	-4.49788
TRIB1	1.12316078441138	1.02482125350014e-16	2.01462015402127	0.0439465888365557	0.432632942277945	-4.49792
FBXO17	1.12299059757067	8.54017711250121e-17	2.01431488887668	0.0439786089517078	0.432632942277945	-4.49796
BTRC	1.1227611193087	-1.08861e-15	2.01390327235846	0.0440218157438565	0.432678082935595	-4.49801
SAMSN1	-1.12238	1.4518301091252e-15	-2.01322	0.0440936606162045	0.432678082935595	-4.4981
HIGD2A	-1.12232	2.20336569502531e-15	-2.01312	0.0441042491724973	0.432678082935595	-4.49811
PIK3C3	1.12197291600263	-6.06353e-16	2.01248946741805	0.0441704938388125	0.432678082935595	-4.49819
ZZEF1	1.12189529281383	9.9066054505014e-16	2.01235023424436	0.0441851587313491	0.432678082935595	-4.49821
GNAI2	-1.12173	-4.27009e-16	-2.01206	0.0442156909340869	0.432678082935595	-4.49825
OAT	1.12114291291624	-1.1273e-15	2.01100068596402	0.0443275145215386	0.432678082935595	-4.49838
ARL13B	1.12107197676808	1.62263365137523e-16	2.01087344737473	0.0443409561047993	0.432678082935595	-4.4984
AKR1C3	-1.12092	1.70803542250024e-17	-2.0106	0.0443697687977735	0.432678082935595	-4.49844
SLC27A1	1.12076449974373	-1.17854e-15	2.01032192401428	0.0443992592349639	0.432678082935595	-4.49847
XYLT2	1.12064469102913	-3.41607e-16	2.01011	0.0444219946127252	0.432678082935595	-4.4985
STXBP1	1.12056346950138	-3.07446e-16	2.00996133487742	0.0444374131192711	0.432678082935595	-4.49852
SEMA4D	-1.11995	-1.28103e-16	-2.00886	0.0445545016421869	0.433039278729514	-4.49866
EVI5	1.11993157443924	1.4091292235627e-16	2.00882790096032	0.0445575217971944	0.433039278729514	-4.49866
PTMS	1.11977062798329	3.544173501688e-16	2.00853921034864	0.0445881577346372	0.433039278729514	-4.4987
KIF9	1.11950265175881	-3.41607e-16	2.00805853980695	0.0446392060680412	0.433121754670471	-4.49876
MAPK11	1.11911070144938	-5.12411e-16	2.00735549621451	0.0447139597270603	0.433121754670471	-4.49886
DDX56	1.11882242101771	5.38031158087576e-16	2.00683840589609	0.0447690086011213	0.433121754670471	-4.49892
SRPX2	1.11858697149066	-2.56205e-17	2.00641607868432	0.0448140114977506	0.433121754670471	-4.49898
PIH1D1	1.11837757330712	1.25540603553768e-15	2.00604047992178	0.0448540670933653	0.433121754670471	-4.49902
NBAS	-1.11834	-6.83214e-16	-2.00598	0.0448604051153722	0.433121754670471	-4.49903
DNAJC18	1.11790141455404	9.99200722162641e-16	2.00518639114501	0.0449452634950943	0.433121754670471	-4.49913
PPP1R10	1.11782740129337	2.73285667600039e-16	2.00505363312079	0.0449594529316747	0.433121754670471	-4.49915
C2ORF74	1.11636247820904	-1.45183e-16	2.00242599190437	0.0452410786190667	0.433121754670471	-4.49949
UHRF2	1.11620987927558	-1.02482e-16	2.00215227429324	0.0452705005031985	0.433121754670471	-4.49953
AARS	-1.11605	3.58687438725051e-16	-2.00186	0.0453020637495689	0.433121754670471	-4.49956
KLHL42	1.11601340918903	-1.52869e-15	2.00179986473486	0.0453084047288394	0.433121754670471	-4.49957
VSTM4	1.11597348008587	1.69095506827524e-15	2.00172824366592	0.0453161113686826	0.433121754670471	-4.49958
COMMD2	-1.11586	-3.75768e-16	-2.00153	0.0453372328238831	0.433121754670471	-4.49961
PIGR	1.11578959973907	-1.53723e-16	2.00139841639834	0.0453516160251705	0.433121754670471	-4.49962
ZNF544	1.11566539354096	-1.17094e-16	2.00117562700484	0.0453756117255146	0.433121754670471	-4.49965
ABCC4	1.11566155482934	-4.22739e-16	2.00116874148506	0.0453763535060816	0.433121754670471	-4.49965
ATXN2	1.11530617504926	-4.27009e-17	2.00053129466781	0.0454450702646636	0.433121754670471	-4.49973
DUSP23	1.1152169992229	-5.46571e-16	2.00037133945967	0.0454623271925617	0.433121754670471	-4.49975
ZNF521	1.11484913251957	3.41607084500048e-16	1.9997114947742	0.0455335735908848	0.433121754670471	-4.49984
BHLHE40	1.11479157200937	8.71098065475123e-16	1.99961	0.0455447301024397	0.433121754670471	-4.49985
SCLT1	1.11476897424578	-2.39125e-16	1.99956771440355	0.0455491106830357	0.433121754670471	-4.49986
UBALD1	1.11450093076628	-8.71098e-16	1.99908692322614	0.0456010980491949	0.433121754670471	-4.49992
BRCC3	-1.11441	-1.36643e-16	-1.99892	0.0456193464474853	0.433121754670471	-4.49994
ZBED6	1.11438913358599	3.15986553162545e-16	1.99888639196142	0.0456227960225162	0.433121754670471	-4.49995
NR2F1	1.11436666232837	5.97812397875084e-16	1.99884608513349	0.0456271583697677	0.433121754670471	-4.49995
TCTEX1D1	1.1140529540289	5.12410626750072e-16	1.99828338469793	0.0456880953022873	0.433121754670471	-4.50002
COPS7A	1.11366152831241	5.60449123007892e-18	1.99758128207095	0.0457642247620181	0.433121754670471	-4.50011
SLC17A9	-1.11366	-3.41607e-16	-1.99758	0.0457642868756043	0.433121754670471	-4.50011
HIST1H2AC	-1.11346	-4.39819e-16	-1.99722	0.0458031429338522	0.433121754670471	-4.50016
PCBP4	1.11344072335888	-8.19857e-16	1.99718522291747	0.0458072168504284	0.433121754670471	-4.50016
CD247	-1.11331	4.69709741187566e-16	-1.99695	0.0458331990820566	0.433121754670471	-4.50019
PPP2R5B	1.11316566546443	-4.48359e-17	1.99669184994241	0.0458608199084793	0.433121754670471	-4.50023
FANCD2	1.11304212078935	6.02082486431335e-16	1.99647024712669	0.0458849133851754	0.433121754670471	-4.50026
CHD3	1.11188236929305	1.19562479575017e-15	1.99438999399594	0.0461116064725496	0.433481427961866	-4.50052
CYP46A1	1.11187999056688	-3.41607e-16	1.99438572726072	0.0461120724023856	0.433481427961866	-4.50052
LRRK1	1.11185049898154	-2.73286e-16	1.99433282802934	0.0461178493568927	0.433481427961866	-4.50053
MINK1	1.1111896932467	-9.4796e-16	1.99314753686732	0.0462474510974145	0.433481427961866	-4.50068
RPP21	-1.1108	-4.27009e-16	-1.99245	0.0463238850838548	0.433481427961866	-4.50077
PAM	1.11078253974092	1.19562479575017e-16	1.9924172232115	0.0463274574139778	0.433481427961866	-4.50077
PIGQ	1.11046093835739	3.41607084500048e-16	1.9918403649043	0.0463907349468299	0.433481427961866	-4.50085
PEX2	1.11016515727178	-3.24527e-16	1.99130982061846	0.0464489963571901	0.433481427961866	-4.50092
WAS	-1.1099	1.02482125350014e-16	-1.99083	0.0465021040885913	0.433481427961866	-4.50098
RTP4	1.10973330694727	-1.17e-15	1.99053520813256	0.0465341705823061	0.433481427961866	-4.50102
KIAA1671	1.10969930576203	-1.79344e-16	1.99047422000513	0.0465408822457157	0.433481427961866	-4.50102
SLC38A2	1.1095023798086	4.09928501400058e-16	1.99012099275563	0.0465797704687918	0.433481427961866	-4.50107
XRN1	1.10948310268312	-3.33067e-16	1.99008641526143	0.0465835787148612	0.433481427961866	-4.50107
GAB2	-1.10943	-5.12411e-16	-1.98999	0.0465939783090509	0.433481427961866	-4.50109
AP2B1	1.10916933834125	-1.53723e-16	1.98952361430228	0.0466456005282867	0.433481427961866	-4.50115
MPP1	-1.10911	-8.36937e-16	-1.98942	0.0466565177705222	0.433481427961866	-4.50116
ZNF589	-1.10872	-7.85696e-16	-1.98871	0.0467348494467423	0.433481427961866	-4.50125
LEF1	1.10866251194202	-9.05259e-16	1.98861451678691	0.0467459317211408	0.433481427961866	-4.50126
FABP5	-1.10866	-5.16681e-16	-1.9886	0.0467473506615146	0.433481427961866	-4.50126
SRP9	-1.10855	-1.15292e-15	-1.98841	0.0467680411301154	0.433481427961866	-4.50129
HEBP2	1.10853554746842	-5.29491e-16	1.98838677985831	0.0467710939937632	0.433481427961866	-4.50129
MSLN	1.10852741081471	-5.46571e-16	1.98837218509434	0.0467727069333825	0.433481427961866	-4.50129
SNX2	-1.10841	2.39124959150034e-16	-1.98817	0.0467952132013771	0.433481427961866	-4.50132
SNX5	1.10795385901715	8.54017711250121e-17	1.98734340183661	0.0468865208606442	0.43381285680827	-4.50142
CFAP46	1.10770969853761	0	1.98690544973774	0.046935042010392	0.43381285680827	-4.50148
IL17RC	1.10740453967645	6.83214169000096e-16	1.98635808448033	0.0469957445422553	0.43381285680827	-4.50155
GNG5	-1.10717	1.22978550420017e-15	-1.98594	0.0470426681008289	0.43381285680827	-4.5016
HSF2	1.10688559077719	1.70803542250024e-16	1.98542724276482	0.0470991260824217	0.43381285680827	-4.50167
CPNE2	1.10676663586172	4.15532992630137e-16	1.98521387262811	0.0471228504196655	0.43381285680827	-4.5017
MUC20	1.1065807967408	-3.41607e-16	1.98488053189577	0.0471599342436668	0.43381285680827	-4.50174
TM7SF3	1.1064532468923	1.36109072730488e-16	1.98465174497674	0.0471854007631417	0.43381285680827	-4.50177
KIF3B	1.1062348595261	8.88178419700125e-16	1.98426002226398	0.0472290306982174	0.43381285680827	-4.50182
GPR137	1.10594111053608	6.66133814775094e-16	1.98373312296004	0.0472877700624339	0.43381285680827	-4.50188
TMOD2	1.10588278563148	3.05311331771918e-16	1.98362850523308	0.0472994402792341	0.43381285680827	-4.5019
TRPS1	1.10571328875108	-5.38031e-16	1.98332447767438	0.0473333686192558	0.43381285680827	-4.50194
HCFC1R1	1.10563143397334	3.11716464606294e-16	1.98317765427454	0.0473497608893452	0.43381285680827	-4.50196
DUSP14	1.10556883864809	-2.56205e-16	1.98306537666874	0.0473622994748247	0.43381285680827	-4.50197
ZNF345	1.10505368903326	3.24526730275046e-16	1.98214134975223	0.0474655961309923	0.434410912228481	-4.50209
NR4A1	1.10410851592372	6.83214169000096e-17	1.98044598714525	0.047655612773684	0.435107679739354	-4.5023
ZBTB10	1.1040424011512	-2.73286e-16	1.98032739668603	0.0476689283161645	0.435107679739354	-4.50232
KCTD11	1.1038117742231	0	1.97991371979858	0.0477154011603169	0.435107679739354	-4.50237
CCT3	1.10363619974672	1.37496851511269e-15	1.97959879081997	0.0477508061004371	0.435107679739354	-4.50241
NCKAP1	1.10341225281925	-1.36643e-16	1.97919709588922	0.047795997483666	0.435107679739354	-4.50246
TRAM2	1.10326043135703	9.39419482375132e-17	1.97892477283287	0.047826654745779	0.435107679739354	-4.5025
CLSTN1	1.10325572346464	-3.75768e-16	1.97891632825838	0.0478276056732059	0.435107679739354	-4.5025
SUSD1	-1.10316	7.55805674456357e-16	-1.97875	0.0478462385996298	0.435107679739354	-4.50252
CMTR1	-1.10264	-2.73286e-16	-1.97782	0.0479515614308754	0.435380382959232	-4.50264
WDR17	1.10263856017677	7.34455231675104e-16	1.97780931881207	0.0479524015524165	0.435380382959232	-4.50264
PTPRC	-1.10237	2.04964250700029e-16	-1.97733	0.0480066187251522	0.435526713212075	-4.5027
SORD	-1.1016	-6.83214e-17	-1.97594	0.048163418489843	0.436059529967849	-4.50288
LYPD6B	1.10157	3.24526730275046e-16	1.97588777477894	0.0481696716280011	0.436059529967849	-4.50288
MYO5B	1.10134750576354	1.53723188025022e-16	1.97549354686123	0.0482143492999875	0.436059529967849	-4.50293
PCDH17	1.10129806514297	4.2700885562506e-16	1.97540486492717	0.0482244043784999	0.436059529967849	-4.50294
MYDGF	-1.10079	8.54017711250121e-17	-1.9745	0.0483272575442278	0.436059529967849	-4.50306
GTPBP8	-1.10048	4.69709741187566e-16	-1.97393	0.0483913425403207	0.436059529967849	-4.50313
SLC2A4RG	-1.10038	4.2700885562506e-17	-1.97375	0.0484124256534565	0.436059529967849	-4.50315
ELK3	1.10026426938569	-6.83214e-17	1.97355053935182	0.0484350583895792	0.436059529967849	-4.50318
SYS1	-1.10015	-2.90366e-16	-1.97335	0.0484577220410377	0.436059529967849	-4.5032
EPG5	1.09998474794549	1.02482125350014e-16	1.97304916008829	0.0484921483359662	0.436059529967849	-4.50324
PHC3	1.09972392599814	-1.19562e-16	1.97258132221589	0.0485454700236729	0.436059529967849	-4.5033
MAOB	1.09969015580842	-3.24527e-16	1.9725207484265	0.0485523775029334	0.436059529967849	-4.50331
KRTCAP3	1.09936411119549	-1.70804e-17	1.97193592027239	0.0486191103347463	0.436059529967849	-4.50338
BMPR1B	1.0993597581373	-2.73286e-16	1.97192811216612	0.0486200018130136	0.436059529967849	-4.50338
PATZ1	1.09895464141931	-9.6504e-16	1.97120145190864	0.0487030272066432	0.436059529967849	-4.50348
ATP6V1D	-1.09832	1.46891046335021e-15	-1.97006	0.0488340884948495	0.436059529967849	-4.50362
TACSTD2	1.09828620741114	-1.87884e-16	1.97000247786753	0.0488402775832197	0.436059529967849	-4.50363
TMEM150C	1.09822539722146	0	1.96989340226999	0.0488527799119438	0.436059529967849	-4.50364
BUB3	-1.09813	5.97812397875084e-16	-1.96972	0.0488726190789729	0.436059529967849	-4.50366
B9D1	1.09806325261549	-2.13504e-16	1.96960256252951	0.0488861293195438	0.436059529967849	-4.50368
PXN	1.09792085183297	-6.57594e-16	1.96934713740214	0.048915433637827	0.436059529967849	-4.50371
CDC73	-1.09745	3.73632748671928e-16	-1.96851	0.0490119645059621	0.436059529967849	-4.50382
GTF2I	1.0974134142336	2.04964250700029e-16	1.96843694357346	0.0490199779334412	0.436059529967849	-4.50383
MAN1B1	1.09739668249211	7.34455231675104e-16	1.96840693174961	0.0490234282641042	0.436059529967849	-4.50383
NUMBL	1.09731257623119	8.54017711250121e-17	1.96825606985103	0.0490407752972283	0.436059529967849	-4.50385
LIN52	1.09709808068122	-6.14893e-16	1.96787132791211	0.0490850386269164	0.436059529967849	-4.5039
PARP10	1.09704007684337	-8.02777e-16	1.96776728608446	0.0490970140643281	0.436059529967849	-4.50391
CAB39L	1.09686358200353	1.57993276581272e-16	1.96745070624447	0.0491334681653914	0.436059529967849	-4.50395
EFNA5	1.09638063681307	8.02776648575113e-16	1.96658444459477	0.0492333341422048	0.436297179507607	-4.50406
SHKBP1	-1.09636	3.41607084500048e-17	-1.96656	0.0492365813633814	0.436297179507607	-4.50406
TLK1	1.09608636905114	-8.54018e-17	1.96605661476659	0.0492942678651019	0.436470004621208	-4.50413
LRRIQ1	1.0958354341293	-5.46571e-16	1.96560651131042	0.0493462786760848	0.436592346398085	-4.50418
ABHD5	-1.09541	-1.70804e-16	-1.96485	0.0494335301069718	0.436975448654728	-4.50428
TSPAN6	1.09525819032016	4.09928501400058e-16	1.96457110566965	0.0494660977177879	0.436975448654728	-4.50432
SLF2	-1.09433	-1.06752e-17	-1.96291	0.0496586952185288	0.436975448654728	-4.50452
C16ORF58	1.09426068690209	-7.42995e-16	1.96278187787818	0.0496737257124607	0.436975448654728	-4.50454
COPZ2	1.09402601910432	-6.63465e-16	1.96236095285885	0.0497226773242778	0.436975448654728	-4.50459
KLF5	1.09372989632474	-2.04964e-16	1.96182979567452	0.049784506151495	0.436975448654728	-4.50466
COA5	-1.09372	9.05258773925128e-16	-1.96181	0.0497871399797811	0.436975448654728	-4.50466
ELN	1.09347831888545	-1.11022e-16	1.96138	0.0498370847963266	0.436975448654728	-4.50472
HFE	1.09299828301566	4.09928501400058e-16	1.96051749654701	0.0499375395032532	0.436975448654728	-4.50483
RENBP	-1.09294	3.75767792950053e-16	-1.96041	0.0499506306703309	0.436975448654728	-4.50484
PDLIM7	1.09293529091118	-2.97839e-16	1.96040450723597	0.0499507341381325	0.436975448654728	-4.50484
SMCO4	-1.09284	-3.24527e-16	-1.96023	0.0499711580556374	0.436975448654728	-4.50486
GPX4	-1.09227	1.10168284751266e-15	-1.95922	0.0500893675465085	0.436975448654728	-4.50499
SHANK2	1.09226227007069	2.39124959150034e-16	1.95919730576655	0.0500918909222269	0.436975448654728	-4.50499
ENGASE	1.09192595486432	-3.50147e-16	1.95859405518814	0.0501625535788697	0.436975448654728	-4.50507
IGHG3	1.09178132369221	-3.28263e-17	1.95833462939775	0.0501929674887302	0.436975448654728	-4.5051
ICAM5	1.09165653390677	4.61169564075065e-16	1.95811079322019	0.0502192214528751	0.436975448654728	-4.50513
LIMD2	-1.09164	3.07446376050043e-16	-1.95808	0.0502231884682502	0.436975448654728	-4.50513
PTPN3	1.09158057235208	4.09928501400058e-16	1.95797454052945	0.0502352082992032	0.436975448654728	-4.50515
SUSD4	1.09131473883295	1.02482125350014e-16	1.95749771337105	0.0502911891316298	0.436975448654728	-4.50521
CAPN15	1.09101404729607	6.14892752100087e-16	1.95695836117967	0.0503545735849426	0.436975448654728	-4.50527
SNX21	1.09094796863921	-4.48359e-16	1.95683983550133	0.050368511644289	0.436975448654728	-4.50529
GOPC	1.09094624406976	3.07446376050043e-16	1.95683674213089	0.0503688754533141	0.436975448654728	-4.50529
ARHGEF12	1.09091747050531	-1.19562e-16	1.95678513081784	0.0503749457468195	0.436975448654728	-4.5053
DEPDC5	1.09084532961866	3.41607084500048e-16	1.95666	0.0503901678412643	0.436975448654728	-4.50531
PLAT	1.09057031748501	-2.90366e-16	1.95616244038836	0.0504482321627588	0.436975448654728	-4.50537
TAB2	1.09012977310477	-1.23833e-16	1.95537223332319	0.0505413627518999	0.436975448654728	-4.50547
SPSB3	1.08993653319626	-2.2418e-16	1.9550256177543	0.050582258880494	0.436975448654728	-4.50552
NFATC4	1.08981038648954	-5.12411e-17	1.9548	0.0506089707628011	0.436975448654728	-4.50555
EMID1	1.08940522977808	2.73285667600039e-16	1.95407261566499	0.0506948436632699	0.436975448654728	-4.50564
PRRG1	1.08926817828908	6.83214169000096e-17	1.95382678559711	0.0507239193194125	0.436975448654728	-4.50567
KIAA0355	1.08894418192862	-6.57594e-16	1.95324563140557	0.0507927111318396	0.436975448654728	-4.50574
OBSCN	1.08894072908972	2.90366021825041e-16	1.95323943802798	0.050793444668882	0.436975448654728	-4.50574
CIDEB	1.08894072908972	2.90366021825041e-16	1.95323943802798	0.050793444668882	0.436975448654728	-4.50574
HSPA4L	1.08883320833972	-3.07446e-16	1.95304657742163	0.0508162913144476	0.436975448654728	-4.50577
LMF2	1.08870247071467	1.19562479575017e-15	1.95281207256892	0.0508440828146948	0.436975448654728	-4.5058
ADAP1	-1.08864	7.85696294350111e-16	-1.9527	0.0508573435022488	0.436975448654728	-4.50581
METTL4	1.08859729591746	7.17374877450101e-16	1.95262341991198	0.0508664495458968	0.436975448654728	-4.50582
CRYBG3	1.08849344662642	6.91754346112598e-16	1.9524371448233	0.0508885424770729	0.436975448654728	-4.50584
SLC25A5	-1.08835	-1.40913e-15	-1.95218	0.0509186683236897	0.436975448654728	-4.50587
WRNIP1	1.08783423270414	-6.83214e-17	1.95125470890489	0.0510289713609746	0.436987416743012	-4.50599
PTPMT1	-1.08783	-8.71098e-16	-1.95125	0.0510300764137471	0.436987416743012	-4.50599
ALDH3A2	1.08780714927809	-1.19562e-16	1.95120612920311	0.0510347477343995	0.436987416743012	-4.506
NSMCE1	1.08735648958277	1.11022302462516e-16	1.95039777823734	0.0511309451597446	0.437190343875133	-4.5061
NOL3	1.08707868272854	1.70803542250024e-17	1.94989947443684	0.0511903211785646	0.437190343875133	-4.50616
TFEC	-1.08687	-5.12411e-17	-1.94952	0.0512352709731607	0.437190343875133	-4.50621
ATG16L1	1.08663282209862	5.55111512312578e-16	1.94909973158309	0.0512857362198056	0.437190343875133	-4.50626
AKR1C2	-1.08654	-1.19562e-16	-1.94894	0.0513045721142111	0.437190343875133	-4.50628
NOC3L	1.08650597246172	2.04964250700029e-16	1.94887220063777	0.0513129094784739	0.437190343875133	-4.50629
STAG3	-1.08644	-5.43369e-16	-1.94876	0.0513261693185573	0.437190343875133	-4.5063
CLASRP	1.0861764713583	-4.44089e-16	1.94828117255618	0.0513835503041569	0.437308119988982	-4.50636
DTWD2	1.08597908760842	-3.41607e-17	1.94792712415448	0.0514259058329982	0.437308119988982	-4.50641
SLF1	1.08584467597438	2.47665136262535e-16	1.94768602921007	0.0514547652335912	0.437308119988982	-4.50644
IKZF1	-1.08531	-7.85696e-16	-1.94672	0.0515707473887881	0.437545596923946	-4.50656
CALML4	-1.08528	-3.07446e-16	-1.94667	0.0515761874124731	0.437545596923946	-4.50656
C16ORF89	1.08518064047365	-5.97812e-16	1.94649494479782	0.0515975386802099	0.437545596923946	-4.50659
SLCO2A1	1.08395203718652	-3.67228e-16	1.94429119180191	0.0518625733503673	0.439339225273328	-4.50686
FOLR1	1.08383505580259	6.49053460550092e-16	1.94408136160041	0.0518878678898059	0.439339225273328	-4.50689
AIP	-1.08362	-6.55459e-16	-1.94369	0.051935010566646	0.439339225273328	-4.50694
DLD	-1.08349	5.97812397875084e-17	-1.94346	0.05196278825733	0.439339225273328	-4.50697
AGFG2	1.08258652198198	6.49053460550092e-16	1.94184185908848	0.0521584781630594	0.439892665588262	-4.50717
GOLGA8B	1.08250008026647	8.54017711250121e-17	1.94168680807119	0.0521772573612249	0.439892665588262	-4.50719
SNRPN	-1.08242	-1.19562e-15	-1.94155	0.0521940972659534	0.439892665588262	-4.50721
TUBE1	-1.08233	6.31973106325089e-16	-1.94139	0.0522135371885979	0.439892665588262	-4.50723
SLIT3	1.08230040191707	-1.44329e-15	1.94132864383272	0.052220658490357	0.439892665588262	-4.50723
MEF2C	1.08149749772083	-7.85696e-16	1.93988846981852	0.052395478785879	0.439962090324026	-4.50741
DNAL1	1.08140969235823	8.02776648575113e-16	1.93973097281934	0.0524146267304754	0.439962090324026	-4.50743
HYPK	1.08138066470418	5.12410626750072e-16	1.93967890574427	0.0524209581534538	0.439962090324026	-4.50744
CASZ1	1.08133680577128	-5.46571e-16	1.93960023571646	0.0524305257425499	0.439962090324026	-4.50745
UQCC3	1.08101951219339	-2.04964e-16	1.93903110434576	0.0524997851176958	0.439962090324026	-4.50752
HS3ST2	1.08051165110243	1.52869170313772e-15	1.93812015089768	0.0526108010754355	0.439962090324026	-4.50763
LSM10	-1.08035	-3.92848e-16	-1.93783	0.0526467325320272	0.439962090324026	-4.50767
AASDH	1.08030617681172	-3.58687e-16	1.93775159044494	0.0526557724790669	0.439962090324026	-4.50768
MAPRE3	1.08016035231788	2.73285667600039e-16	1.93749002418631	0.0526877080414219	0.439962090324026	-4.50771
MBP	1.08013008606774	7.30185143118853e-16	1.93743573543408	0.0526943383782515	0.439962090324026	-4.50772
NDST1	1.0799818536829	5.46571335200077e-16	1.93716985012709	0.0527268212761585	0.439962090324026	-4.50775
SIPA1L2	1.07972808688516	2.09234339256279e-16	1.93671466711834	0.0527824693045178	0.439962090324026	-4.50781
MVB12B	-1.07964	9.73580190825137e-16	-1.93655	0.0528024174082729	0.439962090324026	-4.50783
PMEPA1	1.07960176557894	-2.22045e-16	1.93648808384288	0.0528101883520287	0.439962090324026	-4.50784
CDS2	-1.07927	-4.9533e-16	-1.93589	0.0528828060849516	0.439962090324026	-4.50791
ARID4B	1.07919540015348	-9.18069e-16	1.93575918377143	0.0528994408166833	0.439962090324026	-4.50793
FAHD2A	-1.07902	1.92153985031277e-16	-1.93544	0.0529380735571687	0.439962090324026	-4.50797
DNAH5	1.07888620508858	7.17374877450101e-16	1.93520457875144	0.0529674355891865	0.439962090324026	-4.508
NLRP1	1.07877041756045	-6.31973e-16	1.93499688997617	0.0529929170946463	0.439962090324026	-4.50802
TMEM42	1.07863863855129	1.04190160772515e-15	1.93476051718662	0.0530219303272137	0.439962090324026	-4.50805
TOMM40	-1.07857	-3.50147e-16	-1.93463	0.053037486024858	0.439962090324026	-4.50807
IL1RL1	-1.07832	2.90366021825041e-16	-1.93418	0.0530930017141928	0.439962090324026	-4.50812
OTUD7A	-1.07805	-4.8679e-16	-1.9337	0.0531523444849871	0.439962090324026	-4.50818
TECR	1.07804576901596	-3.92848e-16	1.93369708358818	0.0531526241568961	0.439962090324026	-4.50818
SSR4	1.07731212181253	2.49373171685035e-15	1.93238113625234	0.0533147238848815	0.440984521510912	-4.50835
RHOJ	1.07699060834307	-1.45183e-16	1.93180443563712	0.0533858924741757	0.441176905508169	-4.50842
AXIN2	1.07678869544451	3.24526730275046e-16	1.93144226327459	0.053430627437457	0.441176905508169	-4.50846
PARL	-1.07666	2.39124959150034e-16	-1.93122	0.0534584818735505	0.441176905508169	-4.50849
IFI44L	1.07651028556593	-1.45183e-16	1.93094287782572	0.0534923620885594	0.441176905508169	-4.50852
PREPL	1.07592733799848	2.04964250700029e-16	1.92989724131986	0.0536218179322097	0.441244539591997	-4.50865
ISOC2	1.07583108635423	5.55111512312578e-16	1.92972459417527	0.0536432177888853	0.441244539591997	-4.50868
SETD4	1.07574748332578	-4.27009e-16	1.92957463492777	0.0536618112353407	0.441244539591997	-4.50869
EPS8L2	1.07561755363031	3.07446376050043e-16	1.92934157926314	0.0536907184860216	0.441244539591997	-4.50872
PFKP	1.07506518160973	-3.41607e-17	1.92835078629687	0.0538137574759526	0.441244539591997	-4.50885
CDC25B	-1.0749	-2.3699e-16	-1.92805	0.0538506507233142	0.441244539591997	-4.50888
FRMD6	1.07447606174425	1.36642833800019e-16	1.92729407850346	0.0539452412301786	0.441244539591997	-4.50898
PLAG1	-1.07446	-2.39125e-16	-1.92727	0.0539487080425606	0.441244539591997	-4.50898
CDC42EP2	-1.07434	3.41607084500048e-17	-1.92704	0.0539764631430133	0.441244539591997	-4.50901
DCN	1.07429633864178	5.12410626750072e-16	1.92697170810966	0.0539854063883218	0.441244539591997	-4.50902
MRFAP1	1.07403289606318	-1.02482e-15	1.92649916959546	0.0540443265804175	0.441244539591997	-4.50908
IGFBP2	1.07385594320866	-4.9533e-16	1.92618176821181	0.0540839330571383	0.441244539591997	-4.50911
DYNC1LI1	1.07364802758676	-4.6117e-16	1.92580882872887	0.0541305007260243	0.441244539591997	-4.50916
ARFGEF1	1.07364460144205	-4.44089e-16	1.92580268323279	0.0541312683731076	0.441244539591997	-4.50916
CDADC1	1.07295980272948	-6.38378e-16	1.92457435572444	0.0542848838780229	0.441244539591997	-4.50931
PACRG	1.07289201992685	4.69709741187566e-16	1.92445277330973	0.0543001088248306	0.441244539591997	-4.50933
AP4B1	-1.07246	2.22044604925031e-16	-1.92368	0.0543974814961095	0.441244539591997	-4.50942
BBX	1.07237403489229	9.67175057990761e-16	1.92352366048404	0.0544165730482879	0.441244539591997	-4.50944
SRF	1.07232571815598	8.54017711250121e-17	1.92343699446783	0.0544274472450687	0.441244539591997	-4.50945
IRF8	-1.07227	-1.55858e-16	-1.92333	0.0544407476685012	0.441244539591997	-4.50947
CASP1	-1.07224	-3.50147e-16	-1.92328	0.0544468165441612	0.441244539591997	-4.50947
ARMCX6	1.07217840126865	3.45877173056299e-16	1.92317275129415	0.0544606136723392	0.441244539591997	-4.50949
TSPAN13	1.07209475654751	-1.19562e-16	1.92302271726222	0.0544794526659334	0.441244539591997	-4.50951
NRP2	1.07194745058594	-5.12411e-16	1.92275849368613	0.0545126430643361	0.441244539591997	-4.50954
TMEM25	1.07191883276015	2.04964250700029e-16	1.92270716172244	0.0545190930763947	0.441244539591997	-4.50954
SDHB	-1.07187	-7.89966e-16	-1.92263	0.0545292245117395	0.441244539591997	-4.50955
WIPF2	1.07181375501799	5.46571335200077e-16	1.92251868315372	0.0545427814227532	0.441244539591997	-4.50957
SPDL1	1.07101482873193	-8.96719e-17	1.92108564434055	0.0547231694175946	0.441920963102671	-4.50974
UQCC2	-1.07084	1.3920488693377e-15	-1.92077	0.0547635383753159	0.441920963102671	-4.50978
CTSF	1.07050303118173	-8.11317e-17	1.92016763004223	0.0548389884335522	0.441920963102671	-4.50986
RTKN	1.07046589575012	-1.87884e-16	1.92010101999851	0.0548474000737523	0.441920963102671	-4.50987
CCDC59	-1.07021	-2.90366e-16	-1.91963	0.0549063070979302	0.441920963102671	-4.50992
RARRES2	1.0699674747802	2.41260003428159e-16	1.91920699935149	0.0549604028295331	0.441920963102671	-4.50998
F8	1.06990849833199	4.2700885562506e-16	1.91910121294688	0.0549737868936522	0.441920963102671	-4.50999
LIMCH1	1.06955797527754	-9.90661e-16	1.91847247766718	0.055053390376302	0.441920963102671	-4.51007
AVIL	1.06928471260124	1.02482125350014e-16	1.91798232478553	0.0551155147335144	0.441920963102671	-4.51013
AKAP6	1.06928471260124	1.02482125350014e-16	1.91798232478553	0.0551155147335144	0.441920963102671	-4.51013
KIAA0753	1.0690022145129	2.90366021825041e-16	1.91747560629062	0.055179800122576	0.441920963102671	-4.51019
THRA	1.06898318726037	3.22124805462155e-16	1.91744147699501	0.0551841322182305	0.441920963102671	-4.51019
CNOT4	-1.06895	1.28102656687518e-16	-1.91738	0.0551920564591977	0.441920963102671	-4.5102
RBBP7	1.06892590449538	6.78944080443846e-16	1.91733872856004	0.0551971759818007	0.441920963102671	-4.51021
MAP3K3	1.06888587304562	-1.1273e-15	1.9172669239114	0.0552062930024157	0.441920963102671	-4.51022
RABIF	-1.06853	3.24526730275046e-16	-1.91662	0.0552878624662346	0.44226420983312	-4.51029
TACC1	1.06801	-2.47665e-16	1.91570037343971	0.0554055102030644	0.442895375616244	-4.51041
ZSCAN18	1.06778003512487	4.2700885562506e-16	1.91528337588058	0.0554586403582711	0.443010285070159	-4.51046
EVI5L	-1.06686	-2.64745e-16	-1.91363	0.055669540505425	0.443471027591799	-4.51066
ADGRL4	1.06680869085223	-9.99201e-16	1.91354106990327	0.0556810891304502	0.443471027591799	-4.51067
TLCD2	1.06661066475604	-2.22045e-16	1.91318586932117	0.0557265304370808	0.443471027591799	-4.51072
ZNF292	1.06641572665464	-3.75768e-16	1.91283620769363	0.0557712933087988	0.443471027591799	-4.51076
KIAA2026	-1.06616	9.60769925156385e-18	-1.91238	0.0558295331722578	0.443471027591799	-4.51082
GOSR1	1.06614793249599	1.28102656687518e-16	1.91235586372451	0.0558328346642248	0.443471027591799	-4.51082
RGL2	1.06603899198644	-2.56205e-17	1.91216045648704	0.0558578862931123	0.443471027591799	-4.51084
TMEM101	1.06602244241445	-1.04937e-15	1.91213077142169	0.0558616928015338	0.443471027591799	-4.51085
ARF5	1.06600598615165	-1.03336e-15	1.9121012537256	0.0558654780624784	0.443471027591799	-4.51085
PPIF	-1.06577	-3.07446e-16	-1.91168	0.0559189685064457	0.443587598193741	-4.5109
RHOG	-1.06535	-1.53723e-16	-1.91093	0.0560157833095355	0.4437174164332	-4.511
ZNF707	-1.06468	4.09928501400058e-16	-1.90973	0.0561700506021563	0.4437174164332	-4.51114
STK25	1.06452561758253	4.2700885562506e-16	1.90944590785159	0.0562068667868407	0.4437174164332	-4.51118
MYC	1.06435789501604	-2.39125e-16	1.90914506289029	0.0562456547132272	0.4437174164332	-4.51121
KDM4A	1.06432603691362	-1.14438e-15	1.9090879188232	0.056253024813133	0.4437174164332	-4.51122
DNAJB6	-1.06427	1.70803542250024e-16	-1.90899	0.0562650465308625	0.4437174164332	-4.51123
GSTP1	1.06425285611663	-1.77636e-15	1.90895665399404	0.0562699576104282	0.4437174164332	-4.51124
PPP2R2D	-1.06399	4.2700885562506e-18	-1.90849	0.0563305184117607	0.4437174164332	-4.5113
ZDHHC9	1.06397086198501	-4.18469e-16	1.90845083944925	0.0563352459649578	0.4437174164332	-4.5113
SPARC	1.06391168662142	5.76461955093831e-17	1.90834469624895	0.0563489544729058	0.4437174164332	-4.51131
SWI5	1.06348	2.73285667600039e-16	1.90756529145632	0.0564497005245392	0.4437174164332	-4.51141
GNA15	-1.06345	5.316260252532e-16	-1.90751	0.0564565330774918	0.4437174164332	-4.51141
SYNPO2	1.06343974036706	6.14892752100087e-16	1.9074981634561	0.0564583845146785	0.4437174164332	-4.51142
SP140L	-1.06335	-5.93542e-16	-1.90734	0.0564787718406357	0.4437174164332	-4.51144
PLXNA3	1.06301799414907	4.09928501400058e-16	1.90674167476593	0.056556324309387	0.443957779405056	-4.51151
TSPAN1	1.06288584070871	-1.14438e-15	1.90650463035692	0.0565870426553379	0.443957779405056	-4.51154
PIP5K1C	1.06191964860882	8.00641604296988e-16	1.9047715658624	0.0568120508880853	0.445094143001623	-4.51175
AACS	1.06164244016246	8.36937357025118e-16	1.90427433542963	0.056876744868068	0.445094143001623	-4.51181
IDI1	-1.06163	-4.09929e-16	-1.90426	0.0568791899087883	0.445094143001623	-4.51181
BRMS1L	1.06155107343422	2.39124959150034e-16	1.90411045038781	0.0568980811556694	0.445094143001623	-4.51183
UBA1	1.06133752292491	-7.17375e-16	1.90372740357393	0.056947976213514	0.445094143001623	-4.51188
PACRGL	1.06104463550772	1.70803542250024e-17	1.90320204967827	0.0570164671567872	0.445094143001623	-4.51194
D2HGDH	1.06093717149787	-3.24527e-16	1.90300929084705	0.0570416145080574	0.445094143001623	-4.51197
SORT1	1.06092961240698	-2.98906e-16	1.90299573206094	0.0570433837369765	0.445094143001623	-4.51197
ADGRF1	-1.06053	-7.00295e-16	-1.90228	0.0571369727679145	0.445520283567552	-4.51206
PPHLN1	-1.06006	9.56499836600135e-16	-1.90144	0.0572470954163085	0.446074674644732	-4.51216
TCTN2	1.05983605277445	0	1.90103420766843	0.0572998162293212	0.446181334684857	-4.51221
ZNF552	1.05929236324876	1.79343719362525e-16	1.90005898854471	0.0574276642016519	0.446412854307898	-4.51233
CAPN5	1.05910742093739	2.39124959150034e-16	1.89972725642498	0.0574712072061468	0.446412854307898	-4.51237
AGTPBP1	-1.05902	5.6365168942508e-16	-1.89957	0.0574915123533176	0.446412854307898	-4.51239
POGLUT1	1.0588495155244	-1.36643e-16	1.89926464995754	0.0575319745483696	0.446412854307898	-4.51242
SNX20	-1.05877	-5.12411e-16	-1.89911	0.0575518514439099	0.446412854307898	-4.51244
LMAN1	1.05853914815018	8.88178419700125e-16	1.89870794215939	0.0576051737295513	0.446412854307898	-4.51249
FGF18	1.0584078270562	-8.71098e-16	1.89847	0.0576361687049422	0.446412854307898	-4.51252
IGSF8	1.05832413463183	5.80732043650082e-16	1.89832227113751	0.0576559293874948	0.446412854307898	-4.51254
RSL1D1	-1.05822	1.13584355596266e-15	-1.89813	0.0576810240410083	0.446412854307898	-4.51256
ZNF423	-1.05737	3.15986553162545e-16	-1.89662	0.0578810582046865	0.447454611322544	-4.51275
KCNJ15	1.05725305469838	2.64745490487537e-16	1.89640106871445	0.057909320549182	0.447454611322544	-4.51277
PLEKHG2	1.05715290229025	5.29490980975075e-16	1.89622142474656	0.0579330613907239	0.447454611322544	-4.51279
FRK	1.05683117670832	-1.96424e-16	1.89564434366394	0.0580093802531119	0.447741543331075	-4.51286
TMEM106B	1.05624158061921	5.55111512312578e-16	1.8945867816654	0.0581494594818859	0.448361705998336	-4.51299
ARL17A	1.05594449856669	8.19857002800116e-16	1.89405390382749	0.0582201481615861	0.448361705998336	-4.51306
BAX	-1.05594	-1.43475e-15	-1.89404	0.0582216136666581	0.448361705998336	-4.51306
RBL1	-1.05573	-1.07606e-15	-1.89367	0.0582710798639328	0.448361705998336	-4.51311
BZW2	1.05566866386824	3.24526730275046e-16	1.8935591374945	0.0582858450803541	0.448361705998336	-4.51312
DRC3	1.05541556066973	-6.83214e-17	1.89310514478762	0.058346182098257	0.448524013157482	-4.51317
LUC7L	1.05515602860722	1.02482125350014e-16	1.89263962058931	0.0584081055584287	0.44866902495211	-4.51323
LPCAT1	-1.05478	-1.28103e-16	-1.89197	0.0584969375557847	0.44866902495211	-4.51331
CSRNP2	1.05466527377078	-4.27009e-16	1.89175935073134	0.0585253471936138	0.44866902495211	-4.51334
GNB1L	1.05446934086827	-2.34855e-16	1.89140790472315	0.0585722102513598	0.44866902495211	-4.51338
ACAP1	-1.0544	5.55111512312578e-17	-1.89129	0.058588300146588	0.44866902495211	-4.5134
FAXC	1.05407800067881	-3.75768e-16	1.89070595550652	0.0586659039392458	0.44866902495211	-4.51347
NSL1	-1.05408	1.19562479575017e-16	-1.8907	0.0586662142314084	0.44866902495211	-4.51347
TNFAIP8	-1.05401	-5.12411e-16	-1.89058	0.0586826958243902	0.44866902495211	-4.51348
UBE2O	1.05362677852438	1.36642833800019e-16	1.88989659565452	0.0587740888693718	0.44866902495211	-4.51356
FAM192A	-1.0536	1.36642833800019e-16	-1.88985	0.0587803202547769	0.44866902495211	-4.51357
RAB25	1.05353	1.21270514997517e-15	1.8897217988141	0.0587974752261031	0.44866902495211	-4.51359
BCAM	1.05336866598874	5.46571335200077e-16	1.88943361766995	0.0588360483250121	0.44866902495211	-4.51362
TMEM131	1.05302094412061	-1.87884e-16	1.88880990689474	0.0589196040751238	0.448732117653812	-4.5137
SRRT	1.05285624404047	3.58687438725051e-16	1.88851448338511	0.058959215013065	0.448732117653812	-4.51373
DCDC1	1.05284429724365	3.75767792950053e-16	1.88849305434485	0.0589620891187145	0.448732117653812	-4.51373
IKZF4	1.05221849425465	6.83214169000096e-16	1.88737054781545	0.059112804636632	0.449110172827277	-4.51387
LONRF1	1.05215451754542	4.35549032737561e-16	1.88725579241302	0.0591282304939598	0.449110172827277	-4.51388
ATP1B1	1.05206211519722	2.8182584471254e-16	1.88709004977354	0.0591505161472604	0.449110172827277	-4.5139
CNOT6	1.05172199346729	3.67227615837552e-16	1.88647997141125	0.0592326069769577	0.449110172827277	-4.51398
LTBP2	1.0516438864935	-5.63652e-16	1.88633987046956	0.0592514720017544	0.449110172827277	-4.514
C16ORF87	-1.05123	-1.19562e-16	-1.8856	0.0593507976759221	0.449110172827277	-4.51408
SMG6	1.05121511202961	-4.9533e-16	1.88557077517308	0.059355121901945	0.449110172827277	-4.51409
TPPP3	1.05094931689685	-2.90366e-16	1.88509401686854	0.0594194494654852	0.449110172827277	-4.51415
SLK	1.05088359180154	-4.9533e-16	1.88497612537566	0.0594353651277812	0.449110172827277	-4.51416
CCDC47	1.05074223360314	1.19562479575017e-16	1.8847225703376	0.0594696077116837	0.449110172827277	-4.51419
RAB3IP	1.05038011742961	-4.44089e-16	1.88407304041151	0.0595574013480902	0.449110172827277	-4.51427
DUOXA1	1.05031860361152	2.04964250700029e-16	1.88396270271151	0.0595723258097398	0.449110172827277	-4.51428
C7	1.05014526420853	-3.84308e-16	1.88365178279728	0.0596143980480655	0.449110172827277	-4.51432
KIF27	1.04986009767297	2.26314693481282e-16	1.88314027789276	0.0596836661470776	0.449110172827277	-4.51438
ANKFY1	1.04947661770623	-4.27009e-16	1.88245242760419	0.0597769202218829	0.449110172827277	-4.51447
LSMEM1	1.04946730234285	4.01388324287557e-16	1.88243571858171	0.0597791870204932	0.449110172827277	-4.51447
MAPK6	1.04939367356657	8.96718596812626e-17	1.88230365020943	0.059797106340828	0.449110172827277	-4.51448
VMP1	1.04930253130974	-5.63652e-16	1.88214016780331	0.0598192941554641	0.449110172827277	-4.5145
WIPI1	1.04899092046435	6.83214169000096e-17	1.88158122958355	0.059895204779462	0.449110172827277	-4.51457
ARF1	-1.04877	-1.09741e-15	-1.88118	0.0599498530518049	0.449110172827277	-4.51462
IL13RA1	-1.04871	1.58847294292522e-15	-1.88108	0.0599630176629888	0.449110172827277	-4.51463
SCRN2	1.04848866870567	-3.50147e-16	1.88068033762804	0.0600177250379562	0.449110172827277	-4.51468
AVL9	1.04841132727478	-5.63652e-16	1.88054160984518	0.0600366103081904	0.449110172827277	-4.5147
AKT2	1.04834646347165	-1.11022e-16	1.88042526325718	0.0600524525839462	0.449110172827277	-4.51471
PHLDB1	1.04825370653779	-4.6971e-16	1.88025888459531	0.0600751134751893	0.449110172827277	-4.51473
ATXN7L1	1.04820807857194	8.58287799806371e-16	1.88017704144259	0.0600862631719351	0.449110172827277	-4.51474
SSC5D	1.0481463594132	8.54017711250121e-17	1.88006633542186	0.0601013476593415	0.449110172827277	-4.51475
GGCX	1.04804693441037	-9.00989e-16	1.87988799620517	0.0601256542569565	0.449110172827277	-4.51478
MOV10	1.04792139013115	4.09928501400058e-16	1.87966280668765	0.0601563579212627	0.449110172827277	-4.5148
LCLAT1	1.04771141675354	4.09928501400058e-16	1.87928617619608	0.0602077389920877	0.449110172827277	-4.51485
SGCE	1.04751975906546	8.02776648575113e-16	1.87894239866535	0.0602546699200439	0.449110172827277	-4.51489
PER1	1.0474612385846	-6.83214e-16	1.87883743013208	0.0602690057840122	0.449110172827277	-4.5149
SNX7	1.04670408460914	5.46571335200077e-16	1.87747931855997	0.0604547422074141	0.449704638735733	-4.51507
ACAP2	-1.04655	-3.07446e-16	-1.8772	0.060492515046584	0.449704638735733	-4.5151
MTA3	1.04655	-7.68616e-17	1.87720266356403	0.0604926358735771	0.449704638735733	-4.5151
VPS8	-1.04649	-1.05258e-15	-1.8771	0.0605061442022183	0.449704638735733	-4.51511
PDPN	1.04607289392504	6.23432929212588e-16	1.87634714808992	0.0606099411285202	0.45005429521999	-4.5152
ZNF318	-1.04598	1.53723188025022e-16	-1.87619	0.0606319319953447	0.45005429521999	-4.51522
CD59	1.04536849083076	-6.83214e-17	1.87508365608594	0.0607835314260227	0.45051332494416	-4.51536
RGS22	1.04533135750885	7.34455231675104e-16	1.8750170498264	0.0607926938328866	0.45051332494416	-4.51536
ZNF385B	-1.04524	1.36642833800019e-16	-1.87485	0.0608160814162163	0.45051332494416	-4.51538
CHID1	1.04490787781363	1.62263365137523e-16	1.87425745178786	0.0608972656714212	0.45051332494416	-4.51546
PDZD8	1.04476746683618	8.00641604296988e-17	1.87400559578564	0.060931970896252	0.45051332494416	-4.51549
GMDS	1.04475689224691	1.70803542250024e-16	1.87398662808221	0.0609345852690346	0.45051332494416	-4.51549
HAUS3	-1.04441	8.54017711250121e-17	-1.87336	0.0610204922923332	0.45051332494416	-4.51556
MFSD9	-1.04425	-2.04964e-16	-1.87307	0.0610609305639169	0.45051332494416	-4.5156
B4GALT4	1.04421448897109	-6.19163e-17	1.87301371611249	0.0610688091894588	0.45051332494416	-4.51561
INTS3	1.04404100475093	2.1350442781253e-16	1.87270253643884	0.0611117915098014	0.45051332494416	-4.51564
FSTL1	1.0437715972667	3.41607084500048e-16	1.87221929863807	0.0611785893743354	0.45051332494416	-4.5157
KAT6A	1.04358336311189	1.70803542250024e-17	1.87188166191925	0.0612252967072992	0.45051332494416	-4.51574
ZBED1	1.0434029946519	1.53723188025022e-16	1.87155813394383	0.0612700799955849	0.45051332494416	-4.51578
C1ORF116	1.0431906766974	-3.75768e-16	1.87117729797082	0.061322830710936	0.45051332494416	-4.51583
YWHAB	-1.0431	-2.56205e-16	-1.87102	0.0613448327961411	0.45051332494416	-4.51585
ELF3	1.04239902212634	-1.53723e-16	1.86975730247594	0.0615198501325709	0.45051332494416	-4.516
NME4	1.04230845266136	-7.68616e-17	1.86959484748996	0.061542423565897	0.45051332494416	-4.51602
ZNF384	1.04229918771649	5.46571335200077e-16	1.86957822890345	0.0615447331370921	0.45051332494416	-4.51602
TMEM69	1.04228857056661	8.54017711250121e-18	1.8695591848588	0.0615473798750197	0.45051332494416	-4.51602
PIGG	1.0422727000848	-7.25915e-16	1.86953071788154	0.0615513363861516	0.45051332494416	-4.51602
SMARCC2	1.04196621413104	-1.36643e-16	1.86898097221027	0.0616277846420357	0.45051332494416	-4.51609
MAP4	1.04161919857874	-5.40233e-16	1.86835852835795	0.0617144372546	0.45051332494416	-4.51617
PDK2	1.04134321481081	-4.9533e-16	1.86786349463814	0.0617834246303053	0.45051332494416	-4.51622
LMNA	-1.04127	-2.22045e-16	-1.86774	0.0618005472827812	0.45051332494416	-4.51624
CCDC34	1.04125616473324	7.00294523225099e-16	1.8677073523982	0.061805197684929	0.45051332494416	-4.51624
CHST7	1.04101629467357	-3.92848e-16	1.86727709605088	0.0618652270929818	0.45051332494416	-4.51629
PXDN	1.04101083972119	-3.92848e-16	1.86726731147048	0.0618665927995701	0.45051332494416	-4.5163
OSBPL3	1.04093002744847	-2.56205e-16	1.86712235801806	0.0618868279530296	0.45051332494416	-4.51631
NDRG1	1.04071499557784	3.58687438725051e-16	1.86673665407759	0.0619406979757919	0.45051332494416	-4.51636
TRIM2	1.04060814774511	3.24526730275046e-16	1.86654500048693	0.0619674800417771	0.45051332494416	-4.51638
TFDP2	1.04059089023638	5.80732043650082e-16	1.86651404559126	0.0619718066411712	0.45051332494416	-4.51639
SDAD1	1.04043077087269	-2.13504e-16	1.86622683853986	0.062011961803817	0.45051332494416	-4.51642
C11ORF1	1.04035025292152	-1.05898e-15	1.86608241301375	0.062032162445429	0.45051332494416	-4.51644
EAF2	-1.04033	-1.87884e-16	-1.86605	0.0620366286102082	0.45051332494416	-4.51644
CCDC146	1.03993797265562	5.80732043650082e-16	1.86534290345795	0.0621356821841426	0.45051332494416	-4.51653
FOCAD	1.03981642849818	-5.38031e-16	1.86512488898257	0.062166228057941	0.45051332494416	-4.51655
SLC16A14	-1.03971	-8.79638e-16	-1.86494	0.0621926955677141	0.45051332494416	-4.51658
EFNA1	1.03956190392227	-9.7358e-16	1.86466834674262	0.0622302341602436	0.45051332494416	-4.51661
NHLRC2	1.03955956254151	-5.12411e-16	1.86466414699409	0.0622308232076658	0.45051332494416	-4.51661
ALAS1	-1.03885	-9.90661e-16	-1.86339	0.0624099870716214	0.451157684975631	-4.51676
RNF169	1.03880726695013	3.75767792950053e-16	1.86331474993428	0.0624203256380006	0.451157684975631	-4.51677
IGF1	1.03847756812653	1.53723188025022e-16	1.86272336720083	0.0625035267114234	0.451157684975631	-4.51684
PSMD3	1.03847734811597	-1.09314e-15	1.8627229725666	0.0625035822627467	0.451157684975631	-4.51684
SUSD6	1.03842353790655	-5.85002e-16	1.86262645287512	0.0625171702389467	0.451157684975631	-4.51685
LRRC58	1.03786324256751	1.11022302462516e-16	1.86162144780558	0.0626587993775955	0.451641259979926	-4.51697
SYNJ2	1.03772154279745	1.70803542250024e-17	1.86136728008841	0.0626946596648712	0.451641259979926	-4.517
SFN	1.03759021523063	-3.41607e-17	1.86113171705366	0.0627279101860987	0.451641259979926	-4.51703
BCL2	-1.03747	2.71150623321913e-16	-1.86092	0.0627584652117672	0.451641259979926	-4.51706
RBM5	1.03726804207097	-1.62263e-16	1.86055383314823	0.0628095422267246	0.451641259979926	-4.5171
XPR1	1.03722190032862	1.02482125350014e-16	1.86047106843157	0.0628212407810412	0.451641259979926	-4.51711
TXK	-1.03691	8.54017711250121e-17	-1.85991	0.062900926672406	0.451929913760071	-4.51718
RNASEL	1.03644717479782	-2.90366e-16	1.85908143865651	0.0630179301493172	0.452486155487968	-4.51728
BAIAP2	1.03574409962904	-5.12411e-16	1.85782032856037	0.0631968690843073	0.453003643164177	-4.51743
OCIAD2	1.0357418613311	5.97812397875084e-16	1.85781631371209	0.0631974394210706	0.453003643164177	-4.51743
SPATA2L	-1.03568	1.70803542250024e-16	-1.8577	0.0632140610761379	0.453003643164177	-4.51744
MED7	-1.0353	8.88178419700125e-16	-1.85702	0.0633099724671807	0.453003643164177	-4.51752
ATP7A	1.03524786835315	-2.3699e-16	1.85693023558051	0.0633234170161288	0.453003643164177	-4.51753
SLC39A14	1.03510426763504	-1.87884e-16	1.85667265812157	0.0633600768338113	0.453003643164177	-4.51756
DDX17	1.03495888553324	-5.72192e-16	1.85641188538414	0.0633972092844285	0.453003643164177	-4.51759
MAST4	1.03476331165234	-8.36937e-16	1.85606108335514	0.0634471897217954	0.453003643164177	-4.51764
CD38	1.03465970781887	1.70803542250024e-17	1.85587524854516	0.0634736796819812	0.453003643164177	-4.51766
SLC11A2	1.03447022022758	1.83613807918776e-16	1.8555353635299	0.0635221524828317	0.453003643164177	-4.5177
CBLB	1.03445548086054	3.41607084500048e-16	1.85550892543991	0.0635259242404142	0.453003643164177	-4.5177
ZBTB20	1.03374467440685	1.16146408730016e-15	1.8542339476922	0.0637080371104527	0.453899278397121	-4.51785
SORBS2	1.03365541214112	-4.09929e-16	1.85407383743726	0.063730937085765	0.453899278397121	-4.51787
FBXW9	1.03333012278307	3.67227615837552e-16	1.8534903639883	0.0638144466709229	0.45421104601203	-4.51794
RSPH1	1.03307656912502	-3.07446e-16	1.85303556328949	0.0638796026431614	0.45439187169507	-4.518
CXORF38	-1.03228	-7.77156e-16	-1.85161	0.0640846627517361	0.455567027310382	-4.51817
MAP2K5	1.03199498229818	1.75073630806275e-16	1.8510955145895	0.0641581565962331	0.45580602116317	-4.51823
IQCE	1.03164705804812	1.11022302462516e-15	1.85047144080062	0.064247974585214	0.456009369664286	-4.5183
SLC35B3	1.03157509866811	-2.64745e-16	1.85034236683432	0.0642665641264251	0.456009369664286	-4.51832
POT1	1.03094316448192	-3.15987e-16	1.84920886274018	0.0644300048911665	0.456471025516893	-4.51845
CKB	1.03066233248966	5.12410626750072e-16	1.84870513273166	0.0645027481154272	0.456471025516893	-4.51851
PHKA1	1.03065192237505	6.83214169000096e-17	1.84868646004739	0.0645054459243665	0.456471025516893	-4.51851
ST3GAL4	1.03063652041449	-2.64745e-16	1.84865883345948	0.0645094375543045	0.456471025516893	-4.51852
SLCO2B1	-1.03032	-9.90661e-16	-1.8481	0.0645908143881012	0.456471025516893	-4.51858
LCOR	1.03027243147493	1.11022302462516e-16	1.84800576497127	0.0646038555969078	0.456471025516893	-4.5186
PCOLCE2	-1.03013	2.90366021825041e-16	-1.84774	0.0646419900316399	0.456471025516893	-4.51863
ACSL1	-1.03009	3.07446376050043e-16	-1.84768	0.064651088296024	0.456471025516893	-4.51863
PTPN22	-1.02967	-9.67175e-16	-1.84693	0.064759381670493	0.456953390046547	-4.51872
SH3BP5L	1.02944018264806	-2.04964e-16	1.84651295531923	0.0648201084175374	0.457099728143658	-4.51877
UCHL5	-1.02908	5.97812397875084e-16	-1.84587	0.0649140654831703	0.457242896763313	-4.51885
BST1	-1.02903	0	-1.84577	0.0649278550904118	0.457242896763313	-4.51886
ACD	1.02881377075117	3.84307970062554e-16	1.84538935658812	0.064983269908478	0.457242896763313	-4.51891
VWF	1.02874803472139	1.19562479575017e-16	1.84527144548199	0.065000411796027	0.457242896763313	-4.51892
L3MBTL2	1.02823641738059	-2.90366e-16	1.84435375442633	0.0651339530258522	0.457900502483712	-4.51903
NEK6	-1.02795	4.2700885562506e-16	-1.84384	0.0652085086677565	0.458142878046174	-4.51909
C6ORF120	1.02746392064817	5.55111512312578e-17	1.84296812246014	0.0653360171484972	0.458657035579666	-4.51919
N4BP2L1	-1.02736	4.18468678512559e-16	-1.84279	0.0653619377971547	0.458657035579666	-4.51921
CD4	1.02700472488916	2.56205313375036e-17	1.84214446030635	0.0654563750405367	0.458670469454268	-4.51929
HIST1H1E	-1.02673	-6.83214e-17	-1.84166	0.0655277530090889	0.458670469454268	-4.51935
PLEKHA1	1.02664437394066	4.61169564075065e-16	1.84149809667487	0.0655509531002877	0.458670469454268	-4.51937
ZNF680	1.02653063704916	-4.39819e-16	1.84129408613866	0.0655808279773924	0.458670469454268	-4.51939
SPATC1L	1.02649265023973	4.2700885562506e-17	1.84122594897349	0.0655908083418905	0.458670469454268	-4.5194
ABCA6	1.02638170436415	-5.12411e-17	1.84102694469909	0.0656199645842616	0.458670469454268	-4.51942
LARP1	1.02628750531413	-8.54018e-17	1.84085797930491	0.0656447281976365	0.458670469454268	-4.51944
AP3S1	-1.02577	9.73580190825137e-16	-1.83993	0.0657814019890613	0.458971711871575	-4.51955
EID1	1.02574893064475	-6.31973e-16	1.83989193472924	0.0657864599322882	0.458971711871575	-4.51956
LTBP4	1.02556660869025	-7.34455e-16	1.83956490275915	0.0658344970305843	0.458971711871575	-4.5196
WDR53	-1.02551	-3.41607e-16	-1.83947	0.0658484478584011	0.458971711871575	-4.51961
GTF2H3	1.02510740150973	-4.52629e-16	1.83874122011853	0.0659556143118423	0.459119447771295	-4.51969
ARHGDIB	-1.02504	-1.19562e-16	-1.83861	0.0659746430587728	0.459119447771295	-4.51971
TAF8	-1.02498	-1.96424e-16	-1.83851	0.0659901367061707	0.459119447771295	-4.51972
APAF1	-1.02438	-2.90366e-16	-1.83744	0.0661471649800378	0.459932021220688	-4.51985
ADIRF	1.02398538350558	-1.70804e-16	1.83672864977624	0.0662523225888868	0.460184875761701	-4.51993
PLA2G4F	-1.02394	-9.39419e-17	-1.83665	0.0662640456218843	0.460184875761701	-4.51994
ODF2L	1.0234221207283	1.4347497549002e-15	1.83571832199514	0.0664016868014944	0.460860766137147	-4.52005
AKAP1	1.02303465489801	-1.53723e-16	1.83502332223953	0.0665045946938564	0.461079051499261	-4.52013
TLE2	1.02299998382645	3.24526730275046e-16	1.83496113253302	0.0665138094586897	0.461079051499261	-4.52014
ARSJ	1.02200219357407	7.68615940125108e-17	1.83317139024517	0.0667794498508731	0.461840120489525	-4.52035
ZNF302	-1.02199	8.21992047078241e-16	-1.83314	0.0667837010096097	0.461840120489525	-4.52035
KMT5A	1.02164030675791	-3.50147e-16	1.83252227171875	0.0668760101192123	0.461840120489525	-4.52043
SAXO2	1.02160699571987	-7.85696e-16	1.83246252151243	0.0668849040950751	0.461840120489525	-4.52043
CSNK1E	1.02138368309707	-1.34935e-15	1.83206196433773	0.0669445532382845	0.461840120489525	-4.52048
RASAL2	1.02123423930746	3.37336995943798e-16	1.83179390612682	0.0669844956973593	0.461840120489525	-4.52051
SYNJ2BP	1.0205743865601	-1.14438e-15	1.83061032434408	0.0671610918945426	0.461840120489525	-4.52065
PCDH9	1.02047484859575	-8.49748e-16	1.83043178250763	0.0671877644446152	0.461840120489525	-4.52067
BTBD3	1.02030031094935	8.88178419700125e-16	1.83011871329711	0.067234555225963	0.461840120489525	-4.52071
GOLPH3	1.02025070403002	-6.66134e-16	1.83002973307197	0.0672478589495912	0.461840120489525	-4.52072
PRPF38A	-1.02015	2.56205313375036e-16	-1.82985	0.0672753117491271	0.461840120489525	-4.52074
GAS2L1	1.02013917823116	-7.00295e-16	1.82982968858574	0.0672777761638233	0.461840120489525	-4.52074
ZNF24	1.01985986473386	-1.96424e-16	1.82932868231062	0.0673527511303959	0.461840120489525	-4.5208
TMEM141	1.01963064090368	-9.565e-16	1.82891752216821	0.0674143320911967	0.461840120489525	-4.52085
RAB1B	1.01961869208772	4.18468678512559e-16	1.82889608950623	0.0674175434095996	0.461840120489525	-4.52085
DNAJC4	1.01952503331383	-7.08835e-16	1.82872809320854	0.0674427191465521	0.461840120489525	-4.52087
DPH5	1.01951662092839	5.89272220762583e-16	1.82871300386295	0.0674449807975562	0.461840120489525	-4.52087
DPY19L1	1.01944633707144	1.96424073587528e-16	1.82858693529228	0.067463878894208	0.461840120489525	-4.52089
INTS10	1.01931145017177	-6.66134e-16	1.8283449878611	0.0675001598214707	0.461840120489525	-4.52092
ARHGAP32	1.01906300776728	-1.14438e-15	1.82789935524809	0.067567026123491	0.461840120489525	-4.52097
ZC3H12A	-1.01902	-3.24527e-16	-1.82782	0.0675791906923122	0.461840120489525	-4.52098
ACKR1	1.01899	8.54017711250121e-17	1.82776565267337	0.0675870985584391	0.461840120489525	-4.52099
HAUS1	-1.01897	2.56205313375036e-16	-1.82774	0.0675907983916609	0.461840120489525	-4.52099
TREM1	-1.01897	-2.90366e-16	-1.82772	0.0675932570710327	0.461840120489525	-4.52099
EGFR	1.01868735441433	1.36642833800019e-16	1.82722554360304	0.0676682337345063	0.461867020185267	-4.52105
C17ORF49	-1.01838	-8.54018e-18	-1.82668	0.0677506041105366	0.461867020185267	-4.52111
SPATA33	1.01837452881523	-3.92848e-16	1.82666442647238	0.0677526095868111	0.461867020185267	-4.52112
GALNS	1.01835154168463	5.12410626750072e-16	1.82662319432002	0.0677588131266461	0.461867020185267	-4.52112
NXT2	-1.01807	3.07446376050043e-16	-1.82612	0.0678338925400225	0.46210323338796	-4.52118
PFN2	1.01786953483485	7.17374877450101e-16	1.82575861577754	0.0678890000287708	0.4622031919767	-4.52122
CSF2RA	-1.01759	-5.16681e-16	-1.82525	0.0679651522437299	0.462316138968059	-4.52128
CDK19	1.01698124985374	5.6365168942508e-16	1.82416529374361	0.0681294589074972	0.462316138968059	-4.52141
KRIT1	1.01693475836052	2.22044604925031e-16	1.82408190167674	0.0681420634236534	0.462316138968059	-4.52142
ZC3H18	1.01644449997858	-4.22739e-16	1.82320252231214	0.0682750963191059	0.462316138968059	-4.52152
MPZL3	1.01610744658479	3.58687438725051e-16	1.82259794764258	0.0683666804475818	0.462316138968059	-4.52159
PMS1	1.01601662737295	-5.12411e-17	1.82243504468417	0.0683913751038803	0.462316138968059	-4.52161
P2RY8	-1.01587	1.53723188025022e-16	-1.82217	0.0684322026856217	0.462316138968059	-4.52164
TBC1D2	1.0158437067771	3.41607084500048e-16	1.8221248759868	0.0684384142238602	0.462316138968059	-4.52165
LPIN3	1.01582690450489	8.54017711250121e-17	1.82209473765157	0.0684429863176331	0.462316138968059	-4.52165
CCDC149	1.0152101254523	-4.09929e-16	1.82098841741036	0.0686109929239286	0.462316138968059	-4.52178
HTRA3	1.0150890320517	3.84307970062554e-16	1.8207712114602	0.0686440177528239	0.462316138968059	-4.52181
TCF4	1.01507049365235	-8.62558e-16	1.82073795902344	0.068649074734245	0.462316138968059	-4.52181
RBMS3	1.01489544284117	2.73285667600039e-16	1.82042396934621	0.0686968409171143	0.462316138968059	-4.52185
SLC19A3	-1.01478	5.12410626750072e-17	-1.82022	0.0687281640768804	0.462316138968059	-4.52187
C9ORF24	1.01468976612591	5.6365168942508e-16	1.82005504580335	0.0687529988983485	0.462316138968059	-4.52189
PSEN2	1.01467915153856	1.13691107810172e-16	1.82003600635513	0.0687558981292467	0.462316138968059	-4.52189
RNF152	1.01464390938718	-8.02777e-16	1.81997279229938	0.0687655247665326	0.462316138968059	-4.5219
USP12	-1.0146	-8.96719e-16	-1.8199	0.0687769890729648	0.462316138968059	-4.52191
MRVI1	1.01412452816518	-5.97812e-16	1.81904117512401	0.0689075258249929	0.462316138968059	-4.52201
PTPDC1	-1.01369	0	-1.81826	0.06902641862807	0.462316138968059	-4.5221
ECE1	1.01356772022764	1.70803542250024e-16	1.8180424254272	0.0690600270155698	0.462316138968059	-4.52213
CYLD	-1.01353	-1.02269e-15	-1.81797	0.0690705546030898	0.462316138968059	-4.52213
CDKAL1	1.0134052981917	8.19857002800116e-16	1.81775108805894	0.0691045641297307	0.462316138968059	-4.52216
FAM20A	1.01318622457185	-5.44436e-16	1.81735813440895	0.0691646728254637	0.462316138968059	-4.52221
TMSB4X	-1.01309	3.75767792950053e-16	-1.81719	0.0691897429760009	0.462316138968059	-4.52222
ZNF385A	1.01298147184481	5.97812397875084e-17	1.81699086822925	0.0692208910231687	0.462316138968059	-4.52225
SIKE1	-1.01287	-8.54018e-17	-1.81678	0.0692528469057202	0.462316138968059	-4.52227
PRX	-1.01281	1.06752213906265e-16	-1.81668	0.0692688329660979	0.462316138968059	-4.52228
TUSC1	1.01272614510889	-4.14199e-16	1.81653288715015	0.0692910477171146	0.462316138968059	-4.5223
GSPT1	-1.01265	4.35549032737561e-16	-1.81639	0.0693132370224828	0.462316138968059	-4.52232
POP1	-1.01257	2.1350442781253e-16	-1.81625	0.0693338311219075	0.462316138968059	-4.52233
CD44	-1.01257	2.1350442781253e-16	-1.81625	0.0693338311219075	0.462316138968059	-4.52233
CACNB2	-1.01257	2.1350442781253e-16	-1.81625	0.0693338311219075	0.462316138968059	-4.52233
CPT1C	-1.01257	2.1350442781253e-16	-1.81625	0.0693338311219075	0.462316138968059	-4.52233
B4GALT5	1.01254675397546	-1.05044e-15	1.81621111221119	0.0693403743385718	0.462316138968059	-4.52234
WWP1	1.01173361185445	9.2233912815013e-16	1.81475257437065	0.069564323244486	0.462316138968059	-4.52251
UBE2Q1	1.0115387657424	-2.26315e-16	1.81440307774494	0.0696180742673526	0.462316138968059	-4.52255
UBE2E1	-1.01144	-1.20416e-15	-1.81422	0.0696461379488643	0.462316138968059	-4.52257
ZBTB8A	1.0113575949106	-6.83214e-17	1.81407811055047	0.0696680833624587	0.462316138968059	-4.52259
BOK	1.01133271308867	7.85696294350111e-16	1.81403347987904	0.0696749538647235	0.462316138968059	-4.52259
FERMT3	-1.01107	-1.70804e-16	-1.81356	0.06974841175321	0.462316138968059	-4.52265
SNAI1	1.01053753972945	-6.49053e-16	1.81260717271299	0.0698948145183142	0.462316138968059	-4.52276
SYNE2	1.01052689013067	1.53723188025022e-16	1.81258807046455	0.0698977629282934	0.462316138968059	-4.52276
UPF1	1.01051577957465	-3.67761e-16	1.81256814139439	0.0699008390660608	0.462316138968059	-4.52276
EFNB2	1.0104462724007	-5.63652e-16	1.81244346596463	0.0699200857774456	0.462316138968059	-4.52278
PML	1.0103593724517	1.00774089927514e-15	1.81228759301119	0.0699441547103821	0.462316138968059	-4.5228
ASPH	1.00974960566562	-7.51536e-16	1.81119385071399	0.0701132349368813	0.462316138968059	-4.52292
COL3A1	1.00942731118151	5.29490980975075e-16	1.81061574918815	0.0702027383212355	0.462316138968059	-4.52299
FAM43A	1.00931428262418	-1.19562e-16	1.81041300919515	0.0702341493218159	0.462316138968059	-4.52301
CDK4	1.00889802036578	6.06352574987586e-16	1.80966635711578	0.0703499294003816	0.462316138968059	-4.5231
POLR3GL	-1.00888	-6.85349e-16	-1.80964	0.0703543491369153	0.462316138968059	-4.5231
PRPF40B	1.00881831225641	1.53723188025022e-16	1.80952338420771	0.0703721174384936	0.462316138968059	-4.52312
NFYA	1.00879461112719	-6.66134e-16	1.8094808713518	0.0703787161374505	0.462316138968059	-4.52312
PPP1R15A	-1.00857	-1.79344e-16	-1.80908	0.0704402196695396	0.462316138968059	-4.52317
TRPC6	1.00833704857595	5.46571335200077e-16	1.80866013869247	0.0705062069605797	0.462316138968059	-4.52322
TBL1XR1	1.00813258843697	1.28102656687518e-16	1.80829339732969	0.0705632369745222	0.462316138968059	-4.52326
UQCR11	-1.0081	1.84467825630026e-15	-1.80824	0.0705716328920991	0.462316138968059	-4.52327
RNF146	1.00799867242772	1.31518727532519e-15	1.80805319139041	0.0706006106361271	0.462316138968059	-4.52329
CLCN3	1.00796847172587	-1.49453e-16	1.80799902021256	0.0706090413773938	0.462316138968059	-4.5233
NFRKB	1.00790252219346	1.87883896475026e-16	1.80788072614552	0.0706274545301013	0.462316138968059	-4.52331
ATG3	-1.00783	-7.87831e-16	-1.80774	0.0706489614678711	0.462316138968059	-4.52333
FRYL	1.0077899570525	2.00694162143778e-16	1.8076788173852	0.070658891889152	0.462316138968059	-4.52333
MAPRE1	-1.00752	1.16146408730016e-15	-1.8072	0.0707339299546536	0.462316138968059	-4.52339
PLPP1	1.00743426987858	4.44089209850063e-16	1.80704081919379	0.0707583041659713	0.462316138968059	-4.52341
CMBL	1.00726224577058	9.2233912815013e-16	1.80673225853199	0.0708064249341507	0.462316138968059	-4.52344
TIMM50	1.00725240801363	-4.52629e-16	1.80671461248906	0.070809177687529	0.462316138968059	-4.52344
GRHL2	1.00723018210242	4.78249918300067e-16	1.80667474574042	0.0708153971571947	0.462316138968059	-4.52345
KLRD1	-1.00702	0	-1.80629	0.0708747246998573	0.462316138968059	-4.52349
PNMT	-1.00675	-5.63652e-16	-1.80582	0.070948520609636	0.462316138968059	-4.52355
YWHAZ	-1.00657	9.2233912815013e-16	-1.80549	0.0710011388045997	0.462316138968059	-4.52359
NDUFA7	-1.00649	1.70803542250024e-17	-1.80535	0.0710220810517342	0.462316138968059	-4.5236
CUEDC1	1.00609292667008	0	1.8046348439329	0.0711342333772514	0.462316138968059	-4.52369
CHST3	1.00598547168802	7.17374877450101e-16	1.80444210129489	0.0711644197643422	0.462316138968059	-4.52371
CTNND1	1.00581465661926	-1.53723e-16	1.80413570929392	0.0712124269594581	0.462316138968059	-4.52374
SLC1A4	1.00567004813757	-1.32373e-16	1.80387632420347	0.0712530895989008	0.462316138968059	-4.52377
DPY19L3	-1.00565	9.73580190825137e-16	-1.80384	0.0712590317654417	0.462316138968059	-4.52378
RALGAPA2	1.00548897488657	1.3920488693377e-15	1.80355153204024	0.0713040326461962	0.462316138968059	-4.52381
CELF1	1.00533880414538	-3.33067e-16	1.80328216989197	0.0713463042410778	0.462316138968059	-4.52384
TOP2B	1.00524968415145	-7.17375e-16	1.80312231483081	0.0713714003578962	0.462316138968059	-4.52386
TJAP1	1.00505606576009	-1.1273e-15	1.80277502037497	0.0714259480716269	0.462316138968059	-4.5239
PTPRZ1	1.00498028501853	6.49053460550092e-16	1.80263909200981	0.0714473069262592	0.462316138968059	-4.52392
VASP	-1.00486	-3.41607e-17	-1.80242	0.0714810272738922	0.462316138968059	-4.52394
FAM227B	-1.0048	-2.30585e-16	-1.80231	0.0714984813091448	0.462316138968059	-4.52395
MKRN2	-1.00474	-3.41607e-17	-1.80221	0.0715140598374874	0.462316138968059	-4.52397
BMPR2	1.00468405961291	-2.98906e-16	1.80210775074454	0.0715308484896721	0.462316138968059	-4.52398
XXYLT1	1.00463426026127	3.58687438725051e-16	1.80201842535243	0.0715449007719286	0.462316138968059	-4.52399
RUSC1	1.00451799236547	4.61169564075065e-16	1.80180987493882	0.0715777178224751	0.462316138968059	-4.52401
BCL2A1	-1.00449	1.65679435982523e-15	-1.80175	0.0715868023878376	0.462316138968059	-4.52402
TTC8	1.00444444301185	1.19562479575017e-16	1.80167794902744	0.0715984837725524	0.462316138968059	-4.52403
CPLX1	1.00441690291167	3.80037881506304e-16	1.80162855018655	0.0716062607242162	0.462316138968059	-4.52403
MCAM	1.00428072282341	1.11022302462516e-16	1.80138428315535	0.071644726312591	0.462316138968059	-4.52406
TMEM205	1.00419664224428	-2.56205e-16	1.80123346732235	0.0716684842647535	0.462316138968059	-4.52408
STARD8	1.00416330625832	-3.67228e-16	1.80117367236681	0.0716779055247544	0.462316138968059	-4.52409
SGCD	1.00405920664627	7.68615940125108e-16	1.80098694827587	0.0717073322010645	0.462316138968059	-4.52411
MXD3	1.00360685186812	2.1350442781253e-16	1.80017555682997	0.0718353179487795	0.46249858048683	-4.5242
HMGCR	-1.00339	-5.42301e-16	-1.79979	0.0718960748083751	0.46249858048683	-4.52425
CYP39A1	1.00338741946667	0	1.7997819596313	0.071897469821109	0.46249858048683	-4.52425
LCN10	1.00338741946667	0	1.7997819596313	0.071897469821109	0.46249858048683	-4.52425
TAF5	1.00318484050526	9.39419482375132e-17	1.79941859254788	0.0719548872353815	0.462607601792827	-4.52429
CARF	1.00281906318014	1.96424073587528e-16	1.79876249559249	0.0720586554639549	0.46301432861634	-4.52437
HIC1	1.00224419467646	4.73979829743817e-16	1.79773135055119	0.0722219889187064	0.463288900847107	-4.52448
KRT5	1.00200310123457	-5.63652e-16	1.79729889981594	0.0722905793256884	0.463288900847107	-4.52453
JAM3	1.00196273308406	-1.53723e-16	1.79722649122517	0.0723020691627496	0.463288900847107	-4.52454
HSDL2	-1.00179	-5.12411e-17	-1.79691	0.0723523580443829	0.463288900847107	-4.52458
CXCL12	1.00154122887069	3.82172925784429e-16	1.79647043662013	0.0724221296889314	0.463288900847107	-4.52463
NFE2L1	1.00118996083234	3.75767792950053e-16	1.79584036505839	0.0725223089159393	0.463288900847107	-4.5247
IER3IP1	-1.00114	-7.17375e-16	-1.79576	0.0725355128098067	0.463288900847107	-4.52471
ZNF354B	1.00098084010287	-4.6117e-16	1.79546526396684	0.0725820025613728	0.463288900847107	-4.52475
APLP2	-1.00085	-3.50147e-16	-1.79523	0.0726190743494238	0.463288900847107	-4.52477
MLF1	1.00079132829869	-6.66134e-16	1.79512533552077	0.0726361335618495	0.463288900847107	-4.52479
EXOSC1	-1.00028	-3.71498e-16	-1.79421	0.0727827368709967	0.463288900847107	-4.52489
EXOC2	1.00023709950309	-1.28103e-16	1.79413121204615	0.0727946297693107	0.463288900847107	-4.5249
WDR6	1.00017632964019	-3.41607e-17	1.79402	0.0728120257060238	0.463288900847107	-4.52491
SLC2A1	1.00012928633975	-3.41607e-17	1.79393782693625	0.0728254946231536	0.463288900847107	-4.52492
DTWD1	1.00002161870293	-5.12411e-16	1.79374470285813	0.0728563285031835	0.463288900847107	-4.52494
condition	1	0.384615384615385	1.79370592526258	0.0728625209595831	0.463288900847107	-4.52495
NMI	-0.999706	-1.87884e-16	-1.79318	0.0729467918437279	0.463288900847107	-4.52501
P2RY6	-0.999695	3.41607084500048e-17	-1.79316	0.0729498960930283	0.463288900847107	-4.52501
MED10	-0.999657	-8.36937e-16	-1.79309	0.0729608425916893	0.463288900847107	-4.52502
DNAJC14	0.999639057568402	5.80732043650082e-16	1.79305850068435	0.0729659728729108	0.463288900847107	-4.52502
TMEM176B	0.999453187133428	2.26047812946516e-16	1.7927251037838	0.0730192931982742	0.463288900847107	-4.52506
ST6GALNAC1	0.999255147539718	-5.12411e-16	1.79236987899113	0.073076139546042	0.463288900847107	-4.5251
MNS1	0.999059200468845	-5.12411e-17	1.79201840756907	0.073132420877602	0.463288900847107	-4.52514
PCYOX1	0.999052142798065	5.80732043650082e-16	1.79200574818317	0.0731344486942216	0.463288900847107	-4.52515
CFD	0.998941180868212	1.96424073587528e-16	1.79180671511212	0.073166336428128	0.463288900847107	-4.52517
BTN3A3	0.998859783430742	6.74673991887595e-16	1.79166071204622	0.0731897352846977	0.463288900847107	-4.52519
MED8	-0.998839	-8.88178e-16	-1.79162	0.0731956744755381	0.463288900847107	-4.52519
PLAGL1	0.99776269908997	-1.75074e-16	1.78969286536367	0.0735057055763583	0.464656957691245	-4.52541
CCSAP	-0.997708	-7.00295e-16	-1.78959	0.0735215304584082	0.464656957691245	-4.52542
TNFSF10	0.997665469687049	-8.54018e-17	1.78951846440754	0.0735337622660714	0.464656957691245	-4.52543
LMO3	0.9973631300232	-1.07606e-15	1.78897615596105	0.0736210619020887	0.464740406827698	-4.52549
RAB3IL1	0.997338142688601	6.06352574987586e-16	1.78893133603092	0.0736282807072839	0.464740406827698	-4.5255
PPP3CB	0.99658892062694	-5.80732e-16	1.78758745197958	0.0738449988995462	0.465769327258084	-4.52565
S100A16	0.996492995187586	-4.44089e-16	1.78741538995063	0.073872783686371	0.465769327258084	-4.52567
SLC34A2	0.996352000840374	2.90366021825041e-16	1.78716248755461	0.073913638187548	0.465770009990001	-4.5257
C6ORF132	0.996165529732814	-1.53723e-16	1.78682801322409	0.0739676983945616	0.465853862450818	-4.52574
GNA12	0.995885694481432	-6.14893e-16	1.78632607107559	0.0740488866299963	0.466108382746414	-4.5258
SLC39A1	0.994663651920782	-6.83214e-17	1.78413408609363	0.0744042902845369	0.468050767786431	-4.52605
DHX32	0.994285660734222	-5.80732e-16	1.7834560810626	0.0745145023564523	0.468050767786431	-4.52613
GLMP	0.994282194133226	-1.62263e-16	1.78344986299985	0.0745155137410459	0.468050767786431	-4.52613
IGHA1	0.994262536789168	-1.17854e-15	1.78341460350534	0.0745212490045757	0.468050767786431	-4.52613
SIRT6	0.993946884082875	-1.90019e-16	1.78284841537574	0.0746133938330926	0.468372160849029	-4.5262
AGL	0.993492465117361	1.28102656687518e-16	1.78203332138474	0.0747462105172639	0.468948371252933	-4.52629
SUMO3	-0.993198	-8.54018e-16	-1.7815	0.0748324472114794	0.468983913561008	-4.52635
VPS13B	0.993192701890747	-5.20951e-16	1.78149563430899	0.0748339303941282	0.468983913561008	-4.52635
SIRPB2	-0.992481	-1.70804e-17	-1.78022	0.0750425121715925	0.470033400895054	-4.5265
FNIP2	0.992058199223769	3.84307970062554e-16	1.77946	0.0751666821276809	0.470553309639387	-4.52658
MAPK8	0.991759823650451	-5.97812e-17	1.77892547211919	0.0752543965962037	0.470840510433989	-4.52665
STEAP2	0.991395970443141	-3.41607e-17	1.77827282646531	0.075361472812893	0.470840510433989	-4.52672
PTBP2	0.991391543956633	1.87883896475026e-16	1.77826488665023	0.0753627762228681	0.470840510433989	-4.52672
LETM1	0.991342159558666	-2.39125e-16	1.77817630556299	0.0753773190529438	0.470840510433989	-4.52673
DLEC1	0.990589569298296	3.58687438725051e-16	1.77682637995366	0.0755992271592645	0.471326854648118	-4.52689
COX7A2	0.990581618388442	-1.23406e-15	1.77681211835955	0.0756015744007389	0.471326854648118	-4.52689
GCH1	0.99048764885233	6.14892752100087e-16	1.77664356464583	0.0756293202841907	0.471326854648118	-4.52691
TSC22D1	0.990138905602808	-3.41607e-17	1.77601802181277	0.0757323645029465	0.471326854648118	-4.52698
PILRA	-0.990117	6.14892752100087e-16	-1.77598	0.0757389021305116	0.471326854648118	-4.52698
EHD1	-0.990077	-3.54417e-16	-1.77591	0.0757507398253626	0.471326854648118	-4.52699
MIB2	-0.990011	3.58687438725051e-16	-1.77579	0.0757702203034299	0.471326854648118	-4.527
EHF	0.989932129442212	-4.27009e-16	1.7756471261883	0.0757935153629682	0.471326854648118	-4.52702
FAM189A2	0.989821430522511	-1.14438e-15	1.77544856488012	0.0758262694163143	0.471326854648118	-4.52704
ANKRD10	0.989539613998997	5.97812397875084e-16	1.77494306891205	0.0759097065838168	0.471589052151962	-4.5271
FAM171A1	0.988596058042345	1.02482125350014e-16	1.77325060700179	0.0761896097756164	0.473070847009816	-4.52729
AFG3L2	0.988306601198821	-1.79344e-16	1.77273140654645	0.0762756448725755	0.473347935145717	-4.52735
DCTN6	-0.987962	-1.00774e-15	-1.77211	0.0763783021058375	0.473572377444949	-4.52742
MYZAP	-0.987907	3.75767792950053e-16	-1.77201	0.0763946692335304	0.473572377444949	-4.52743
NCF1	-0.987417	-1.05044e-15	-1.77114	0.0765405165475178	0.47421931959603	-4.52753
RASL12	0.987111967168178	1.28102656687518e-16	1.77058858440717	0.0766315640234904	0.474526223376229	-4.5276
ADAMTS1	0.986953573311941	7.17374877450101e-16	1.77030447240871	0.0766788560544413	0.47456199434668	-4.52763
ZC2HC1A	0.986420559985333	-8.02777e-16	1.76934840324653	0.0768381739003134	0.474616076797446	-4.52774
SERPINI2	0.986331189533745	7.60075763012607e-16	1.76918809893797	0.0768649131513231	0.474616076797446	-4.52776
PGM2L1	0.986150963003297	4.2700885562506e-16	1.76886482554242	0.0769188592175972	0.474616076797446	-4.52779
ARHGAP28	-0.986102	-1.96424e-16	-1.76878	0.076933517150437	0.474616076797446	-4.5278
TMEM251	-0.986026	3.15986553162545e-16	-1.76864	0.0769563680570507	0.474616076797446	-4.52782
TXNIP	-0.985909	8.19857002800116e-16	-1.76843	0.0769914676730265	0.474616076797446	-4.52784
CREM	-0.985827	4.9533027252507e-16	-1.76828	0.0770160035593258	0.474616076797446	-4.52786
SLC37A4	0.98581415927139	2.77555756156289e-16	1.76826069869285	0.0770197552671911	0.474616076797446	-4.52786
CLK1	0.985606918290367	-1.19562e-16	1.76788896931723	0.0770818918844797	0.474743052872569	-4.5279
LARP4B	0.984917229118456	3.03176287493793e-16	1.76665186976298	0.0772889741745853	0.474879211726304	-4.52804
SOX7	0.984775264544158	-3.15987e-16	1.76639722706488	0.0773316558852164	0.474879211726304	-4.52807
WDR60	0.984588202090841	-8.19857e-16	1.76606169203398	0.0773879256147011	0.474879211726304	-4.52811
PPP4R2	-0.984465	1.13157346740641e-16	-1.76584	0.0774249165329304	0.474879211726304	-4.52814
PTPRJ	-0.984385	7.46197975204793e-16	-1.7657	0.077448960143206	0.474879211726304	-4.52815
DPYSL3	0.983870064399498	-3.15987e-16	1.76477356420186	0.0776042565135481	0.474879211726304	-4.52826
AUP1	-0.983837	5.80732043650082e-16	-1.76471	0.0776141390614799	0.474879211726304	-4.52826
SNTG2	0.983708786249176	2.39124959150034e-16	1.76448427862801	0.0776529074128023	0.474879211726304	-4.52829
RAPGEFL1	0.983708786249176	2.39124959150034e-16	1.76448427862801	0.0776529074128023	0.474879211726304	-4.52829
CYP2B6	0.983708786249176	2.39124959150034e-16	1.76448427862801	0.0776529074128023	0.474879211726304	-4.52829
RNF130	-0.983684	-4.01388e-16	-1.76444	0.0776602888620522	0.474879211726304	-4.5283
WDR61	-0.983576	5.08140538193822e-16	-1.76425	0.0776930922942083	0.474879211726304	-4.52832
SAMD1	0.983549225132346	2.56205313375036e-17	1.76419807290731	0.0777010647985646	0.474879211726304	-4.52832
AGR2	0.983511512419853	-9.39419e-16	1.76413042739146	0.0777124504835031	0.474879211726304	-4.52833
ENPP1	-0.983355	-9.8212e-16	-1.76385	0.077759746792864	0.474879211726304	-4.52836
VRK2	-0.983325	-7.17375e-16	-1.7638	0.0777686890343488	0.474879211726304	-4.52837
TMEM231	0.98307227131467	-3.24527e-16	1.76334255801847	0.0778451600037587	0.475025840573073	-4.52842
ADAMTS4	0.982970900954525	1.19562479575017e-16	1.76316072940283	0.0778758135975802	0.475025840573073	-4.52844
KLF6	-0.982762	-1.06752e-17	-1.76279	0.0779390056082676	0.475157745657657	-4.52848
EVI2A	-0.982312	6.83214169000096e-16	-1.76198	0.0780751942230802	0.475367613376557	-4.52857
PIK3R3	0.982191968747849	1.70803542250024e-17	1.76176355408834	0.0781116846120964	0.475367613376557	-4.5286
NBEA	0.982032688763791	4.2700885562506e-16	1.76147785263716	0.0781599882613128	0.475367613376557	-4.52863
CNDP2	0.98185801491433	2.69015579043788e-16	1.76116453911839	0.0782129882465653	0.475367613376557	-4.52867
PDIK1L	0.981525754846465	4.52629386962564e-16	1.76056856226593	0.0783138841976743	0.475367613376557	-4.52873
ARHGAP19	-0.981443	-1.00774e-15	-1.76042	0.0783389919385323	0.475367613376557	-4.52875
TMEM98	0.981365484055299	1.19562479575017e-16	1.76028108359817	0.078362590786654	0.475367613376557	-4.52877
MS4A4A	-0.981308	-2.56205e-16	-1.76018	0.0783799173580492	0.475367613376557	-4.52878
RAB11FIP3	-0.981308	-2.56205e-16	-1.76018	0.0783799173580492	0.475367613376557	-4.52878
CGGBP1	-0.981188	-1.62263e-16	-1.75996	0.078416628348191	0.475367613376557	-4.5288
FADD	0.981140932670129	-4.27009e-16	1.75987830444807	0.0784308738367761	0.475367613376557	-4.52881
ITPKC	0.981004239572157	1.11022302462516e-16	1.75963311722829	0.0784724640723109	0.475367640069203	-4.52884
AARSD1	-0.97981	-3.07446e-16	-1.75749	0.0788364844274031	0.476684091417664	-4.52908
PRSS12	0.979677799163609	6.83214169000096e-16	1.75725387320797	0.0788769796235497	0.476684091417664	-4.52911
COG1	0.979615072372116	-6.49053e-16	1.7571413597904	0.0788961509181613	0.476684091417664	-4.52912
EXOC1	0.97928466853166	5.72191866537581e-16	1.75654871246404	0.0789971953774224	0.476684091417664	-4.52919
HPGD	-0.979027	8.28397179912617e-16	-1.75609	0.0790760729860752	0.476684091417664	-4.52924
TRIM29	0.978944928510616	1.70803542250024e-16	1.75593931877525	0.0791012047826648	0.476684091417664	-4.52926
TLR2	-0.978822	-4.8679e-16	-1.75572	0.0791388124831728	0.476684091417664	-4.52928
GLT8D1	0.97851301337958	5.6365168942508e-16	1.7551645900455	0.0792335938345663	0.476684091417664	-4.52934
RAD51D	0.978394640322071	-1.87884e-16	1.75495226359085	0.0792699085560034	0.476684091417664	-4.52937
NIFK	0.978219721276381	1.41980444495333e-15	1.75463851026216	0.0793235953446712	0.476684091417664	-4.5294
KMT2B	0.978188826557054	4.9533027252507e-16	1.75458309422104	0.079333080735721	0.476684091417664	-4.52941
TIGD1	-0.978172	9.39419482375133e-16	-1.75455	0.0793384007184427	0.476684091417664	-4.52941
CFAP36	0.978117972001817	1.19562479575017e-16	1.75445600198548	0.0793548382008944	0.476684091417664	-4.52942
ECH1	-0.977691	6.44783371993841e-16	-1.75369	0.0794860545805124	0.476684091417664	-4.52951
USP11	0.977602262027126	-1.70804e-17	1.75353096994816	0.0795133446237235	0.476684091417664	-4.52953
ACVR1B	0.97755283069877	-2.02829e-16	1.7534423046816	0.0795285511358484	0.476684091417664	-4.52954
PIEZO1	0.977196839779248	-2.56205e-16	1.75280376165991	0.0796381341214308	0.476684091417664	-4.52961
FBN1	0.977128919908206	-4.8679e-16	1.75268193338478	0.0796590555084101	0.476684091417664	-4.52962
RAB2B	0.976845999846076	-2.64745e-16	1.75217445799296	0.0797462515687888	0.476684091417664	-4.52968
SIRT1	0.976815195552991	-2.73286e-16	1.75211920414993	0.0797557501441631	0.476684091417664	-4.52969
PARD3	0.976737360507238	1.36642833800019e-16	1.75197959096717	0.0797797548589761	0.476684091417664	-4.5297
IER5L	0.976609128027859	2.98906198937542e-16	1.7517495796091	0.0798193151995071	0.476684091417664	-4.52973
RAB5B	0.97651218416997	-3.58687e-16	1.75157569083678	0.0798492334309038	0.476684091417664	-4.52975
NHS	0.976434916795915	3.41607084500048e-17	1.75143709589011	0.079873085750653	0.476684091417664	-4.52976
DGKD	-0.976399	4.44089209850063e-16	-1.75137	0.0798842164348331	0.476684091417664	-4.52977
BOLA1	0.976247158892235	-2.04964e-16	1.75110031342577	0.0799310704604879	0.476684091417664	-4.5298
OGDH	0.976117542493151	2.04964250700029e-16	1.75086781972272	0.0799711194603784	0.476684091417664	-4.52983
RNASEH2C	-0.976086	1.36642833800019e-16	-1.75081	0.0799807373110409	0.476684091417664	-4.52983
FBXL20	0.97602652420019	-3.58687e-16	1.75070455967133	0.0799992521251644	0.476684091417664	-4.52985
NRBF2	-0.975598	9.05258773925128e-16	-1.74994	0.0801316994563136	0.476684091417664	-4.52993
IFNGR1	-0.975343	-7.42995e-16	-1.74948	0.0802108630189651	0.476684091417664	-4.52998
C20ORF85	0.975321503034068	1.53723188025022e-16	1.74943995902822	0.0802174382463991	0.476684091417664	-4.52999
PKIG	0.975283648626759	6.66133814775094e-16	1.74937205935353	0.0802291668857998	0.476684091417664	-4.53
CDK13	0.974980656692055	-1.53723e-16	1.74882858092494	0.080323094758778	0.476684091417664	-4.53006
NSUN6	0.974951914806545	-2.90366e-16	1.7487770264346	0.0803320094158529	0.476684091417664	-4.53006
PHF21A	0.97493428305721	5.42301246643827e-16	1.74874540026135	0.0803374785222989	0.476684091417664	-4.53007
HELB	-0.974291	-4.95464e-16	-1.74759	0.0805373114069895	0.476684091417664	-4.5302
TTC37	0.974223915500152	4.44089209850063e-16	1.74747120976514	0.0805580756841908	0.476684091417664	-4.53021
MMGT1	0.974208113185028	8.58287799806371e-16	1.74744286505887	0.0805629885148859	0.476684091417664	-4.53021
BRK1	-0.974032	-5.80732e-16	-1.74713	0.0806176102507002	0.476684091417664	-4.53025
TSTD1	0.973870308176424	-2.73286e-16	1.74683694221335	0.0806680679739453	0.476684091417664	-4.53028
TSC2	0.97375810271439	0	1.74663567861125	0.0807029958297555	0.476684091417664	-4.5303
NLK	0.973738708836298	3.58687438725051e-16	1.74660089169721	0.0807090340940232	0.476684091417664	-4.53031
SETBP1	0.97354236012887	-5.46571e-16	1.74624869985727	0.0807701877275417	0.476684091417664	-4.53035
ZNF275	0.97348063844843	3.75767792950053e-16	1.74613798931335	0.0807894189764871	0.476684091417664	-4.53036
DUSP12	0.973466850044997	1.31518727532519e-15	1.74611325697241	0.0807937156770139	0.476684091417664	-4.53036
CMTM8	0.973434999058551	1.53723188025022e-16	1.7460561256693	0.0808036416943559	0.476684091417664	-4.53037
RARS	0.973416140436737	6.4051328343759e-16	1.74602229884761	0.0808095192477093	0.476684091417664	-4.53037
FARP1	0.973216421482733	-8.19857e-16	1.74566406177643	0.080871785762174	0.476684091417664	-4.53041
RFXAP	-0.9732	-5.0387e-16	-1.74564	0.0808768367916522	0.476684091417664	-4.53042
LSG1	0.972984750823297	-1.87884e-16	1.74524851274189	0.0809440626789915	0.476684091417664	-4.53046
ATXN2L	0.972786442029205	-1.26395e-15	1.74489280508289	0.0810059729693251	0.476684091417664	-4.5305
FAM89B	0.972732812750572	-2.22045e-16	1.74479660992804	0.081022722168497	0.476684091417664	-4.53051
C19ORF38	-0.972718	-1.36643e-16	-1.74477	0.0810272448621336	0.476684091417664	-4.53051
RHEB	-0.972348	6.83214169000096e-16	-1.74411	0.0811430258524304	0.476684091417664	-4.53059
OSBP	0.972148917306477	-4.6117e-16	1.74374927321023	0.0812052631625574	0.476684091417664	-4.53063
NDUFB9	-0.97204	1.67387471405024e-15	-1.74355	0.0812392869519812	0.476684091417664	-4.53065
CES4A	0.972031402102987	9.2233912815013e-16	1.74353848549342	0.0812420418123323	0.476684091417664	-4.53065
DSP	0.971949953403976	4.78249918300067e-16	1.7433923904794	0.0812675406856702	0.476684091417664	-4.53067
CLEC4A	-0.971766	6.14892752100087e-16	-1.74306	0.0813251080352237	0.476684091417664	-4.5307
ENPEP	0.97170741089069	-4.7825e-16	1.74295734053619	0.0813435111380894	0.476684091417664	-4.53072
TFAP4	0.971685262206784	-1.00774e-15	1.74291761231064	0.0813504515374	0.476684091417664	-4.53072
MEAF6	-0.971591	5.12410626750072e-17	-1.74275	0.0813800628254703	0.476684091417664	-4.53074
S1PR3	0.971560916407108	-2.77556e-16	1.74269457251298	0.081389424830154	0.476684091417664	-4.53075
SCLY	-0.971526	-3.67228e-16	-1.74263	0.0814003452407733	0.476684091417664	-4.53075
AP1M1	0.971377621479774	-8.11317e-16	1.74236579531575	0.0814469019822148	0.476712512318842	-4.53078
TPCN1	0.971185227479744	3.75767792950053e-16	1.74202069705791	0.0815072678259991	0.476821688085463	-4.53082
DAP	0.970874611204622	-8.26262e-16	1.74146354280474	0.081604803895288	0.477148088658331	-4.53088
CWC15	-0.970469	-1.19562e-16	-1.74074	0.0817323925959125	0.47744657069801	-4.53097
ARID2	0.970446506350845	7.92101427184487e-16	1.74069564859188	0.0817393875300503	0.47744657069801	-4.53097
RCC1	0.970060157773827	-4.14199e-16	1.74000265286007	0.0818609987399551	0.477615446152742	-4.53105
EIF3F	-0.969843	-3.46731e-15	-1.73961	0.0819293913519855	0.477615446152742	-4.53109
PLEKHA5	0.96980577944419	4.78249918300067e-16	1.73954637294294	0.0819411496836077	0.477615446152742	-4.5311
SYTL1	0.968946432201869	6.49053460550092e-16	1.73800495670253	0.082212388456514	0.477615446152742	-4.53127
CYBB	-0.968835	3.41607084500048e-17	-1.7378	0.0822477565742736	0.477615446152742	-4.53129
PTPRR	-0.968835	3.41607084500048e-17	-1.7378	0.0822477565742736	0.477615446152742	-4.53129
ZFP3	-0.968835	3.41607084500048e-17	-1.7378	0.0822477565742736	0.477615446152742	-4.53129
SYN3	-0.968835	3.41607084500048e-17	-1.7378	0.0822477565742736	0.477615446152742	-4.53129
RGL1	0.968786608989991	-5.63652e-16	1.73771828086039	0.0822629142211116	0.477615446152742	-4.5313
CEP131	0.968752484326629	-4.6117e-16	1.73765707124952	0.082273705494286	0.477615446152742	-4.53131
CFAP69	0.968434024853449	3.24526730275046e-16	1.73708584860552	0.082374467570496	0.477615446152742	-4.53137
LMO4	0.968372274402321	5.29490980975075e-16	1.73697508645545	0.0823940172804502	0.477615446152742	-4.53139
PCMTD2	0.967899954882154	-1.14225e-16	1.73612788413351	0.0825436744007754	0.477615446152742	-4.53148
SPRY4	0.967657823319435	1.94289029309402e-16	1.73569357131477	0.0826204805552965	0.477615446152742	-4.53153
CA4	-0.967556	1.53723188025022e-16	-1.73551	0.0826529097952929	0.477615446152742	-4.53155
RNF181	-0.967511	7.85696294350111e-16	-1.73543	0.0826669254117062	0.477615446152742	-4.53156
DBI	-0.967449	-1.36643e-16	-1.73532	0.0826868985265104	0.477615446152742	-4.53157
CD47	0.967387314893625	-1.02482e-15	1.73520835874856	0.0827063565889474	0.477615446152742	-4.53158
COL18A1	0.967285467275915	6.06352574987586e-16	1.7350256740732	0.0827387080363546	0.477615446152742	-4.5316
DIDO1	0.967234	-1.76141e-16	1.73493349001917	0.0827550367118659	0.477615446152742	-4.53161
IDS	-0.967217	2.39124959150034e-16	-1.7349	0.0827605053880261	0.477615446152742	-4.53162
SLC31A2	-0.967171	8.54017711250121e-17	-1.73482	0.0827751984465941	0.477615446152742	-4.53163
PLXNA2	0.967097853193446	-1.19562e-16	1.73468914958181	0.082798329671868	0.477615446152742	-4.53164
SUGCT	0.967071572818306	1.70803542250024e-16	1.7346420103172	0.0828066840577486	0.477615446152742	-4.53165
NRDE2	0.967052143354411	6.66133814775094e-16	1.73460715957269	0.0828128610160734	0.477615446152742	-4.53165
SETDB1	-0.966451	-5.97812e-17	-1.73353	0.083004020097136	0.477772356069748	-4.53177
MAGOH	-0.966432	-2.66881e-16	-1.7335	0.0830100963463989	0.477772356069748	-4.53177
ZNF383	0.966429992301425	-5.15613e-16	1.73349120354254	0.0830108509604811	0.477772356069748	-4.53177
SMUG1	-0.966312	1.36642833800019e-15	-1.73328	0.0830484612634059	0.477772356069748	-4.5318
DNAAF1	0.966310101688942	-1.02482e-15	1.73327615504055	0.0830490483344054	0.477772356069748	-4.5318
CPPED1	-0.965892	4.44089209850063e-16	-1.73253	0.0831825175909406	0.478299476147908	-4.53188
NME7	0.965536990902708	-1.87884e-16	1.73188942164239	0.0832957050184377	0.478709504306567	-4.53195
LFNG	-0.965081	3.75767792950053e-16	-1.73107	0.0834414163442657	0.479251653758133	-4.53204
APPL2	0.964968083008606	-2.39125e-16	1.73086896818181	0.0834775906533976	0.479251653758133	-4.53207
MVK	0.964848647764726	7.00294523225099e-16	1.73065473647718	0.083515816139113	0.479251653758133	-4.53209
TMEM63B	0.964548457007968	-4.09929e-16	1.73011628253808	0.083611955378755	0.479401967607897	-4.53215
TNRC6B	0.964409026135692	-5.76462e-16	1.72986618455631	0.0836566400494933	0.479401967607897	-4.53218
KMT2D	0.964374129990176	4.61169564075065e-16	1.72980359113333	0.0836678265574101	0.479401967607897	-4.53218
TDRP	0.963845484791101	5.80732043650082e-16	1.72885535710739	0.0838374402989063	0.480133156341081	-4.53229
RNF114	-0.963536	4.69709741187566e-16	-1.7283	0.0839369340951031	0.480197412333075	-4.53235
CREBBP	0.962938851266968	-9.26609e-16	1.72722912318311	0.0841289781612543	0.480197412333075	-4.53247
[truncated: 9,433 more rows]

## Sheet: Table S15(EP_DEG)
Table S15: The Differential Genes of Epithelial Cells in the Training Set
gene	diff_IPF_minus_control	AveExpr	t	pvalue	fdr	B
EMB	1.80581244323187	7.00294523225099e-16	3.21921187488763	0.00128574649665852	0.5465469069005	-4.45116
CAMK1D	1.78722	-1.11022e-16	3.18606016261812	0.00144258277520765	0.5465469069005	-4.45443
SLCO2A1	1.7735095222265	-1.19562e-16	3.16162563591592	0.00156926731883922	0.5465469069005	-4.45682
IL32	1.74016028679436	-6.23433e-16	3.10217413799101	0.00192145581816804	0.5465469069005	-4.46256
APOL1	1.73035997477733	-1.36643e-16	3.08470317585369	0.00203797635443463	0.5465469069005	-4.46422
ACAT2	-1.71513	5.6365168942508e-16	-3.05755	0.00223201564176734	0.5465469069005	-4.46679
KLHL9	1.7077828275972	-5.80732e-16	3.04445502019622	0.00233148347034491	0.5465469069005	-4.46802
TRAF5	1.69898307238666	-5.29491e-16	3.02876774515498	0.00245600995584012	0.5465469069005	-4.46949
EPSTI1	1.67386835106685	-2.81826e-16	2.98399587008555	0.00284562861754438	0.5465469069005	-4.47363
TMEM260	1.66367864899765	3.41607084500048e-17	2.96583074445155	0.00301920785283851	0.5465469069005	-4.4753
GPM6A	-1.65306	6.14892752100087e-16	-2.9469	0.00321036267916373	0.5465469069005	-4.47702
HMGB3	1.63983805305609	-5.97812e-16	2.92333024566103	0.00346368016664755	0.5465469069005	-4.47915
ATP12A	1.63788205488739	-2.90366e-16	2.91984329852235	0.00350266855528399	0.5465469069005	-4.47947
ZNF74	-1.63632	-6.83214e-17	-2.91705	0.00353416959620757	0.5465469069005	-4.47972
MDK	1.62787943892836	2.04964250700029e-16	2.90201169026428	0.00370836232266312	0.5465469069005	-4.48106
KRT15	1.62283305613735	-2.22045e-16	2.89301553151759	0.00381625037745815	0.5465469069005	-4.48187
PRODH	-1.61854	-1.36643e-16	-2.88536	0.00391025516401462	0.5465469069005	-4.48255
RNF114	-1.61648	8.28397179912617e-16	-2.88168	0.00395619889471556	0.5465469069005	-4.48287
IL33	1.6150772609448	1.02482125350014e-16	2.87918931823801	0.00398763209462308	0.5465469069005	-4.4831
STEAP3	1.6104	2.04964250700029e-16	2.8708543328665	0.00409429442242466	0.5465469069005	-4.48383
EEF2K	1.60868603966969	0	2.86779572334891	0.00413408021001085	0.5465469069005	-4.4841
AQP5	1.60598050042249	1.53723188025022e-16	2.86297257346689	0.00419753197502489	0.5465469069005	-4.48453
PRKAA2	1.60564439771385	7.00294523225099e-16	2.86237340502339	0.00420547582318584	0.5465469069005	-4.48458
TIMP1	1.60491729010739	1.87883896475026e-16	2.86107719430682	0.00422270782496583	0.5465469069005	-4.4847
TRIM68	1.60250261020859	-1.70804e-17	2.85677255777971	0.0042803947457774	0.5465469069005	-4.48508
PHACTR3	1.59844642131905	-3.41607e-17	2.84954161223553	0.00437890786647103	0.5465469069005	-4.48571
RAMP3	1.59692072465782	-7.34455e-16	2.84682176121903	0.00441649140410721	0.5465469069005	-4.48595
FHL2	1.58691278579529	-6.83214e-17	2.82898066385029	0.00467035859089936	0.5465469069005	-4.48751
CFH	1.58492275225478	8.54017711250121e-17	2.82543304204214	0.00472238674173777	0.5465469069005	-4.48782
EBP	-1.58459	5.97812397875084e-16	-2.82483	0.00473122516512538	0.5465469069005	-4.48787
IGHG1	1.58232109092801	-6.83214e-17	2.82079507475547	0.00479119669617771	0.5465469069005	-4.48822
ERICH2	-1.57931	5.12410626750072e-17	-2.81544	0.00487183927275231	0.5465469069005	-4.48869
BST2	1.57324832161505	-1.00774e-15	2.80462109898081	0.00503831480214508	0.5465469069005	-4.48962
KDR	1.56651404198443	3.41607084500048e-17	2.79261593585496	0.00522912780546081	0.5465469069005	-4.49066
GAS6	1.56616601198775	-6.31973e-16	2.79199550470092	0.00523916423887013	0.5465469069005	-4.49071
FADS1	-1.56128	1.19562479575017e-16	-2.78329	0.00538184355754432	0.5465469069005	-4.49146
OAF	1.5608009877556	3.41607084500048e-17	2.78243130561594	0.00539609749574578	0.5465469069005	-4.49153
SLC5A1	1.55551381971228	-2.22045e-16	2.77300590032904	0.00555489330188343	0.5465469069005	-4.49234
MTMR4	1.55139670474604	1.70803542250024e-17	2.76566634220425	0.00568145463224403	0.5465469069005	-4.49297
SRGAP1	1.55086342197997	-7.68616e-16	2.76471566196076	0.00569803677219936	0.5465469069005	-4.49305
ACPP	-1.55018	-1.53723e-16	-2.76349	0.00571946557970135	0.5465469069005	-4.49315
CASP8AP2	1.54965990171154	-3.58687e-16	2.76257015302139	0.005735620113144	0.5465469069005	-4.49323
TMEM17	1.54898319206492	8.11316825687614e-16	2.76136378646964	0.00575685034669974	0.5465469069005	-4.49333
WFDC10B	-1.54761	-2.04964e-16	-2.75891	0.00580022232503236	0.5465469069005	-4.49354
IFI16	1.54261081196991	-3.41607e-17	2.7500037796483	0.00596027195053655	0.5465469069005	-4.4943
SYNPO	1.53896305848973	4.18468678512559e-16	2.74350094965393	0.0060796107228267	0.5465469069005	-4.49485
FAM83A	1.5370357518422	-7.34455e-16	2.74006515073167	0.00614352906832602	0.5465469069005	-4.49514
TXNRD2	-1.53564	6.91754346112598e-16	-2.73757	0.00619032839504725	0.5465469069005	-4.49535
DPYSL3	1.53359592979943	-2.56205e-16	2.73393299896303	0.00625911498743521	0.5465469069005	-4.49565
FZD8	1.53315792672945	-1.87884e-16	2.73315217330785	0.00627397255009568	0.5465469069005	-4.49572
SPARC	1.52949150175214	-5.29491e-16	2.7266160577386	0.00639959238384406	0.5465469069005	-4.49627
EP400	1.52673251449055	-9.22339e-16	2.72169762637634	0.00649560881934799	0.5465469069005	-4.49668
ODF3B	1.52657409175785	6.83214169000096e-16	2.7214152070452	0.0065011612800335	0.5465469069005	-4.4967
B3GNT3	1.52607299856975	2.39124959150034e-16	2.7205219109847	0.00651875190573166	0.5465469069005	-4.49678
ZNF563	-1.52469	-1.70804e-17	-2.71805	0.00656763539336878	0.5465469069005	-4.49699
LYNX1	1.52069831385563	-5.12411e-16	2.71094049021184	0.00671013739959896	0.5465469069005	-4.49758
IGKC	1.52045053671102	5.12410626750072e-16	2.71049877926382	0.00671908098663136	0.5465469069005	-4.49762
PHGDH	-1.51969	-9.7358e-16	-2.70915	0.00674652932387574	0.5465469069005	-4.49773
KRT5	1.51926959883052	2.90366021825041e-16	2.70839352782275	0.00676185468626557	0.5465469069005	-4.49779
APOBEC3G	1.51548855250709	-3.15987e-16	2.70165307741247	0.00690045566731782	0.5465469069005	-4.49835
SHMT2	-1.51545	0	-2.70158	0.00690188154600959	0.5465469069005	-4.49836
PARP12	1.51524270428311	-6.83214e-17	2.70121480514059	0.00690955542669435	0.5465469069005	-4.49839
TP53INP1	1.51201446778714	8.36937357025118e-16	2.69545984575833	0.00703004866251165	0.5465469069005	-4.49887
CRIP2	1.51059091251562	6.83214169000096e-17	2.69292208163348	0.00708377950723135	0.5465469069005	-4.49908
TK2	1.51032637742258	-3.24527e-16	2.6924504963833	0.00709380468139965	0.5465469069005	-4.49912
ITGB5	1.50994749540043	-4.09929e-16	2.69177506549375	0.00710818548734245	0.5465469069005	-4.49918
VTCN1	1.50696444714577	-1.28103e-15	2.68645720183589	0.00722232712940088	0.5465469069005	-4.49962
KCNN4	1.50635731157061	6.66133814775094e-16	2.68537486459731	0.00724575869768657	0.5465469069005	-4.49971
TIMP3	1.50203501593855	1.53723188025022e-16	2.67766953203209	0.00741455290674112	0.5465469069005	-4.50034
LOX	1.50122758755108	2.39124959150034e-16	2.67623013390256	0.00744647274785959	0.5465469069005	-4.50046
TRIB3	-1.50083	3.75767792950053e-16	-2.67553	0.00746213853199152	0.5465469069005	-4.50052
PDLIM4	1.49915561723706	4.44089209850063e-16	2.67253644386055	0.00752894802386471	0.5465469069005	-4.50076
CCDC80	1.49890342494247	-2.90366e-16	2.67208686204903	0.00753904231122794	0.5465469069005	-4.5008
MCCC1	-1.49887	-8.71098e-16	-2.67203	0.00754035368016608	0.5465469069005	-4.50081
IFI27	1.49651010269409	1.11022302462516e-16	2.66782029968743	0.00763544350195508	0.5465469069005	-4.50115
MX2	1.4942373746123	-3.41607e-17	2.66376871988093	0.00772800857490919	0.5465469069005	-4.50149
IGHG3	1.49151475884355	1.87883896475026e-16	2.65891512777819	0.00784022003064739	0.5465469069005	-4.50188
SYNGR1	1.48931247387113	-5.12411e-17	2.65498912651395	0.00793205176548308	0.5465469069005	-4.5022
SLC46A3	1.48875954179035	2.56205313375036e-17	2.6540034175456	0.00795525891756914	0.5465469069005	-4.50229
SERPINF1	1.4861088238796	4.2700885562506e-16	2.64927799735745	0.00806735901004499	0.5465469069005	-4.50267
ZMAT3	1.48578901648571	-3.75768e-16	2.64870787848162	0.00808097897681173	0.5465469069005	-4.50272
ITGB4	1.48576687393817	-6.83214e-17	2.64866840508434	0.00808192274582163	0.5465469069005	-4.50272
IFIH1	1.48543653718044	4.18468678512559e-16	2.64807951556972	0.00809601422017066	0.5465469069005	-4.50277
GBP1	1.48534431141844	-3.75768e-16	2.64791510521287	0.00809995230359863	0.5465469069005	-4.50278
CDKL2	-1.48392	6.83214169000096e-17	-2.64538	0.00816094365390238	0.5465469069005	-4.50299
DUSP4	1.48347183181572	5.46571335200077e-16	2.64457704616075	0.00818027978377321	0.5465469069005	-4.50305
VAMP5	1.48213718756987	3.84307970062554e-16	2.64219778323061	0.00823796909604556	0.5465469069005	-4.50325
AARS	-1.48205	2.39124959150034e-16	-2.64204	0.00824182405542733	0.5465469069005	-4.50326
SFRP4	1.48192231119324	-5.29491e-16	2.64181472430005	0.00824729096548845	0.5465469069005	-4.50328
A2M	1.48143762079843	-7.60076e-16	2.6409506694086	0.0082683527022249	0.5465469069005	-4.50335
ENPP5	1.4810654832058	-1.11022e-16	2.64028726177633	0.0082845562164947	0.5465469069005	-4.5034
KIAA1586	1.48057387183674	5.12410626750072e-16	2.63941086890228	0.00830600538114337	0.5465469069005	-4.50347
CHL1	1.48047104694039	1.70803542250024e-16	2.63922756352714	0.00831049794268204	0.5465469069005	-4.50349
RBP1	1.48028809562706	-3.92848e-16	2.6389014172307	0.00831849671332067	0.5465469069005	-4.50352
NFATC4	1.47907702904241	6.49053460550092e-16	2.63674245551505	0.00837161939062713	0.5465469069005	-4.50369
OAS2	1.47900513435942	-1.70804e-17	2.63661428926053	0.00837478252702535	0.5465469069005	-4.5037
NPDC1	1.47893831333874	5.80732043650082e-16	2.63649516779579	0.00837772339701535	0.5465469069005	-4.50371
TSKU	1.47721173525611	2.04964250700029e-16	2.63341720657821	0.00845403309230079	0.5465469069005	-4.50396
HS6ST1	1.47696777121636	-3.41607e-17	2.63298229323117	0.00846486556308507	0.5465469069005	-4.504
PI3	-1.47524	-2.04964e-16	-2.62989	0.00854215896651421	0.5465469069005	-4.50425
TGM2	1.47301	-3.41607e-16	2.62592254063155	0.00864244870427916	0.5465469069005	-4.50457
RCBTB2	1.47198104666603	-8.71098e-16	2.62409248690085	0.00868902259129563	0.5465469069005	-4.50472
PLBD1	1.47192549142944	-5.85803e-16	2.62399344888723	0.00869154944190188	0.5465469069005	-4.50472
MICA	-1.47143	5.12410626750072e-17	-2.62311	0.00871413700602214	0.5465469069005	-4.5048
SAP30L	1.47115491984567	-4.7825e-16	2.62261975517822	0.00872666558148993	0.5465469069005	-4.50484
PROM2	1.47106218342678	4.78249918300067e-16	2.62245443447615	0.00873090025978157	0.5465469069005	-4.50485
RABGEF1	-1.47099	-6.40513e-17	-2.62232	0.00873431315603946	0.5465469069005	-4.50486
ST6GAL1	1.46837912755016	-8.36937e-16	2.61767136557473	0.00885421607576707	0.5465469069005	-4.50523
KLK11	1.46780543915291	3.07446376050043e-16	2.61664865443559	0.00888078438842657	0.5465469069005	-4.50532
PKP4	1.4674412799405	9.2233912815013e-16	2.61599946981768	0.00889768603832811	0.5465469069005	-4.50537
PLBD2	1.46417374326158	-1.70804e-16	2.61017445021622	0.00905063183310593	0.5465469069005	-4.50584
SLC26A2	1.4636738427315	4.35549032737561e-16	2.60928328030057	0.0090742369136072	0.5465469069005	-4.50591
PROM1	1.46336498592195	-5.12411e-17	2.60873268297101	0.00908884845093327	0.5465469069005	-4.50595
SORL1	1.45978658291051	-3.92848e-16	2.60235348367447	0.00925967502512103	0.5465469069005	-4.50647
TMEM45A	1.45963198880804	-3.75768e-16	2.60207788962131	0.00926711921549705	0.5465469069005	-4.50649
GPX8	1.45663756980294	3.24526730275046e-16	2.59673975538941	0.00941236727719906	0.5465469069005	-4.50692
KIAA1324	1.45495868789844	-1.36643e-16	2.5937468218853	0.00949468899412097	0.5465469069005	-4.50715
HNRNPH2	1.45479364076954	9.65040013712636e-16	2.59345259327962	0.00950281642224369	0.5465469069005	-4.50718
RGS1	1.45358690007839	5.80732043650082e-16	2.59130134331044	0.00956242880519604	0.5465469069005	-4.50735
COG7	1.4520551232251	-6.83214e-17	2.58857065316913	0.00963857795945302	0.5465469069005	-4.50757
C16ORF74	1.45163416368119	3.33066907387547e-16	2.5878202109138	0.00965959958360759	0.5465469069005	-4.50763
ATG2B	1.4504903745702	-3.41607e-17	2.58578118437909	0.00971692397865007	0.5465469069005	-4.50779
OAS1	1.45029082111259	2.64745490487537e-16	2.58542544153169	0.0097269562016385	0.5465469069005	-4.50782
NANS	1.45005008858493	-1.09314e-15	2.58499628898342	0.00973907092031913	0.5465469069005	-4.50785
FZD7	-1.44895	-8.54018e-18	-2.58304	0.00979437570593374	0.5465469069005	-4.50801
RAPGEFL1	1.44855726222602	-3.58687e-16	2.58233503567345	0.00981449722534792	0.5465469069005	-4.50806
APOL3	1.44848792968727	-2.90366e-16	2.58221143693931	0.00981801292551117	0.5465469069005	-4.50807
SULF1	1.44750568295989	-9.39419e-16	2.58046039112019	0.00986794120137624	0.5465469069005	-4.50821
NLRP1	1.44738994181243	-3.92848e-16	2.58025406001547	0.00987383927739378	0.5465469069005	-4.50823
MYADM	1.44665065532064	-6.23433e-16	2.57893613806725	0.00991158688475062	0.5465469069005	-4.50833
MUC4	1.44659984408343	1.11022302462516e-15	2.57884555715515	0.00991418599729297	0.5465469069005	-4.50834
MUC5B	1.44631182552983	-7.34455e-16	2.57833210806943	0.00992893029286239	0.5465469069005	-4.50838
CHST3	1.44499563473235	5.12410626750072e-17	2.57598574199983	0.00999655785650047	0.5465469069005	-4.50857
MB	1.44453599509761	6.83214169000096e-17	2.57516634496009	0.0100202712049373	0.5465469069005	-4.50863
WBP1L	1.44443846755655	8.54017711250121e-17	2.57499248315095	0.0100253092036576	0.5465469069005	-4.50865
PDLIM5	1.44407288608023	4.52629386962564e-16	2.57434076307106	0.0100442141994794	0.5465469069005	-4.5087
ME3	1.44372243171572	4.01388324287557e-16	2.57371601000987	0.0100623667396596	0.5465469069005	-4.50875
PRKACB	1.44238040847204	4.61169564075065e-16	2.57132359258102	0.0101321501796354	0.5465469069005	-4.50894
SERPINI1	1.44237103087062	4.9533027252507e-16	2.57130687518273	0.010132639314852	0.5465469069005	-4.50894
HIF3A	-1.44092	-3.07446e-16	-2.56872	0.0102084367071142	0.5465469069005	-4.50914
SLC2A10	1.44036066260614	-3.41607e-16	2.56772300277439	0.0102379866849886	0.5465469069005	-4.50922
RBMS3	1.44032045232732	1.14438373307516e-15	2.56765132013229	0.0102401036940363	0.5465469069005	-4.50923
SLC5A5	1.43934794733537	-8.54018e-17	2.56591764085115	0.0102914234002208	0.5465469069005	-4.50937
SLC25A12	1.43803090572099	2.90366021825041e-16	2.56356975803495	0.0103612894215325	0.5465469069005	-4.50955
UCP2	1.43748310057702	3.58687438725051e-16	2.56259318882855	0.0103904732967	0.5465469069005	-4.50963
GNA14	1.4370758396311	9.05258773925128e-16	2.56186716698825	0.0104122171736899	0.5465469069005	-4.50969
RGS5	1.43478557102052	3.15986553162545e-16	2.55778431777791	0.010535251545609	0.5465469069005	-4.51001
FTSJ1	1.43461544154884	6.66133814775094e-16	2.55748102890783	0.0105444423781024	0.5465469069005	-4.51003
P2RY6	1.43458601391446	3.41607084500048e-17	2.55742856842645	0.0105460328580655	0.5465469069005	-4.51004
OPTN	1.43388999816609	7.51535585900106e-16	2.55618778499367	0.0105837127931033	0.5465469069005	-4.51013
ECE1	1.4330446916634	3.58687438725051e-16	2.55468086175722	0.0106296358114886	0.5465469069005	-4.51025
PACS1	1.43225351323225	2.90366021825041e-16	2.55327043233513	0.0106727786734139	0.5465469069005	-4.51036
POSTN	1.43047167497903	2.22044604925031e-16	2.55009395911644	0.0107705127903777	0.5465469069005	-4.51061
PALLD	1.43005505429117	1.11022302462516e-15	2.54935125171585	0.0107934789538858	0.5465469069005	-4.51067
FN1	1.42919128344014	4.18468678512559e-16	2.54781141218752	0.010841232956306	0.5465469069005	-4.51079
SOGA1	1.42794923169551	7.51535585900106e-16	2.5455972133982	0.0109102295850876	0.5465469069005	-4.51097
PRSS23	1.42771195038705	1.70803542250024e-16	2.54517421331935	0.0109234549967898	0.5465469069005	-4.511
SYNE4	-1.42612	-1.19562e-15	-2.54234	0.0110123005885964	0.5465469069005	-4.51122
SLC4A8	1.42519216895618	-1.53723e-16	2.54068221287115	0.0110647821896677	0.5465469069005	-4.51135
SMIM22	1.42518200827774	9.39419482375133e-16	2.54066409948578	0.0110653553456167	0.5465469069005	-4.51135
LY6E	1.42483338451465	-9.22339e-16	2.54004260982763	0.011085036925355	0.5465469069005	-4.5114
DKK3	1.42368325334077	-2.39125e-16	2.53799227733241	0.0111501883819071	0.5465469069005	-4.51156
ABCC3	1.42170858841859	-2.04964e-16	2.53447205307532	0.0112628407777112	0.5465469069005	-4.51184
TSHZ2	1.42067898910722	4.2700885562506e-16	2.5326365920661	0.0113219781830026	0.5465469069005	-4.51198
BDKRB2	1.41987	9.73580190825137e-16	2.53119413149253	0.0113686466604649	0.5465469069005	-4.51209
CP	1.41824007532138	-3.92848e-16	2.52828875392232	0.011463164152972	0.5465469069005	-4.51232
TNS4	1.41760198972577	-4.9533e-16	2.52715124225311	0.0115003591614017	0.5465469069005	-4.51241
MAN1C1	1.41689134014567	-2.39125e-16	2.52588437116928	0.0115419100792967	0.5465469069005	-4.51251
CD93	1.41599623492645	-6.31973e-16	2.52428867203575	0.0115944354675927	0.5465469069005	-4.51263
SFXN2	-1.41569	-3.71498e-16	-2.52374	0.0116125764193677	0.5465469069005	-4.51267
EYA2	1.41527313070622	-2.39125e-16	2.52299959813371	0.0116370224866194	0.5465469069005	-4.51273
SCD5	1.41449015476252	-5.80732e-16	2.52160379124072	0.0116832920777407	0.5465469069005	-4.51284
WFDC2	1.41437301812171	5.80732043650082e-16	2.52139497239771	0.011690228228414	0.5465469069005	-4.51285
FSTL1	1.41410975301941	-9.05259e-16	2.52093	0.0117058305897288	0.5465469069005	-4.51289
SDR16C5	-1.41373	-9.565e-16	-2.52024	0.0117285317981636	0.5465469069005	-4.51294
SUSD4	1.41269116806403	-3.92848e-16	2.51839674758331	0.0117902211454083	0.5465469069005	-4.51309
GSTA1	1.41268414054393	-5.63652e-16	2.51838421966202	0.0117906405470051	0.5465469069005	-4.51309
IGHA1	1.41184206854052	5.46571335200077e-16	2.51688306254957	0.0118409911930723	0.5465469069005	-4.5132
RTTN	1.41106442380318	-8.88178e-16	2.51549675956873	0.0118876587508382	0.5465469069005	-4.51331
KCTD1	1.41015909868896	3.07446376050043e-16	2.51388284148479	0.0119421939855858	0.5465469069005	-4.51344
RPP30	1.41011093545569	-2.73286e-16	2.51379698115469	0.0119451014605632	0.5465469069005	-4.51344
PCSK9	-1.40787	1.53723188025022e-16	-2.50981	0.012080794597294	0.5465469069005	-4.51375
ALG8	1.40783785910977	-5.97812e-16	2.50974478049967	0.0120830362409047	0.5465469069005	-4.51376
RASA3	1.40741348741491	-2.39125e-16	2.50898825542169	0.0121089437754314	0.5465469069005	-4.51382
ERN2	1.4067817896789	-5.12411e-16	2.50786213135452	0.0121475995775102	0.5465469069005	-4.5139
PLTP	1.40611860789622	5.03870449637571e-16	2.50667988085114	0.0121882996324009	0.5465469069005	-4.51399
ANAPC2	1.40585157218026	-5.12411e-16	2.50620383775428	0.0122047219449929	0.5465469069005	-4.51403
CAPN13	1.40548718363054	7.00294523225099e-16	2.50555424429803	0.0122271629475929	0.5465469069005	-4.51408
CLU	1.40521788616534	-2.73286e-16	2.50507416919328	0.0122437712173807	0.5465469069005	-4.51412
CRIP1	1.40516595972157	-1.02482e-16	2.5049816002086	0.0122469759528385	0.5465469069005	-4.51413
TMEM150C	1.40473504566848	-5.12411e-16	2.5042134121047	0.0122735992890357	0.5465469069005	-4.51418
LRRC71	1.40431576483914	4.2700885562506e-16	2.50346596248455	0.0122995530899076	0.5465469069005	-4.51424
GPR87	1.40339330746253	-4.44089e-16	2.50182150281102	0.0123568251226653	0.5465469069005	-4.51437
FBXO32	1.40222342086656	1.09314267040015e-15	2.49973595243388	0.0124297988314425	0.5465469069005	-4.51453
GOLM1	1.40066412937362	-7.17375e-16	2.49695621209635	0.0125276556126454	0.5465469069005	-4.51474
HS3ST1	1.39991365303652	3.92848147175055e-16	2.49561834207266	0.0125749961178119	0.5465469069005	-4.51485
TTLL1	1.39968335456717	1.05898196195015e-15	2.49520779026253	0.0125895552112035	0.5465469069005	-4.51488
TPST1	-1.39919	3.07446376050043e-16	-2.49433	0.012620763795682	0.5465469069005	-4.51495
ADGRG1	1.39861821320539	9.05258773925128e-16	2.49330896863622	0.012657086012111	0.5465469069005	-4.51502
GOLT1A	-1.39847	-5.29491e-16	-2.49305	0.0126663812985398	0.5465469069005	-4.51504
TSPAN8	1.39845523732772	-2.22045e-16	2.49301843243868	0.0126674470471471	0.5465469069005	-4.51505
KRT17	1.39785713576561	4.09928501400058e-16	2.49195220008529	0.0127055351422558	0.5465469069005	-4.51513
NEMF	1.39765742501256	7.17374877450101e-16	2.4915961768282	0.0127182756080527	0.5465469069005	-4.51516
MCC	1.39738810938307	6.83214169000096e-16	2.49111606934205	0.0127354743937146	0.5465469069005	-4.51519
TMEM59L	1.3966477441808	1.19562479575017e-16	2.48979622438262	0.0127828610331643	0.5465469069005	-4.51529
LRRN1	1.39559830919896	0	2.48792540243312	0.0128502968297746	0.5465469069005	-4.51544
CTXN1	1.39528746950125	-4.7825e-16	2.48737127021977	0.0128703314597986	0.5465469069005	-4.51548
LRFN4	1.39418432646999	5.6792177798133e-16	2.48540470322703	0.012941655881031	0.5465469069005	-4.51563
LAYN	1.39276458266439	1.28102656687518e-16	2.48287373378145	0.0130339648140768	0.5465469069005	-4.51582
PTGDS	1.39218803561345	-3.24527e-16	2.48184592653615	0.0130716167169391	0.5465469069005	-4.5159
COL18A1	1.39214735388174	2.56205313375036e-16	2.48177340343759	0.013074277102231	0.5465469069005	-4.51591
LCA5L	1.39185680580845	2.22044604925031e-16	2.48125544499108	0.0130932914451032	0.5465469069005	-4.51595
LAIR1	1.39083436388844	-1.79344e-16	2.47943274342392	0.0131603977275097	0.5465469069005	-4.51609
RND3	1.39036400740948	-3.07446e-16	2.47859424152513	0.013191370800975	0.5465469069005	-4.51615
PTGFRN	1.39021539280763	1.53723188025022e-16	2.47832930709473	0.0132011704945927	0.5465469069005	-4.51617
RHOV	1.38971764574808	6.83214169000096e-17	2.47744197615912	0.0132340389902929	0.5465469069005	-4.51624
WLS	1.38820422188754	-3.84308e-16	2.47474400379668	0.0133344221036491	0.5465469069005	-4.51644
RHOBTB1	-1.38774	2.17774516368781e-16	-2.47391	0.0133654205840826	0.5465469069005	-4.51651
FAM92B	1.38756781088391	3.92848147175055e-16	2.47360947741335	0.0133768349066897	0.5465469069005	-4.51653
VAV3	1.38746532123085	1.00774089927514e-15	2.47342676967457	0.0133836763349733	0.5465469069005	-4.51654
SPPL2B	1.38736209209157	-2.56205e-16	2.47324274365777	0.0133905702515907	0.5465469069005	-4.51656
PIP	1.38720055480698	1.04190160772515e-15	2.47295477203218	0.0134013644396523	0.5465469069005	-4.51658
CYBA	1.38638437785133	8.71098065475123e-16	2.47149977787844	0.0134560204008523	0.5465469069005	-4.51669
MYH10	1.38529829848103	4.09928501400058e-16	2.46956363017992	0.0135290560206708	0.5465469069005	-4.51684
USP21	1.38411825876402	7.42995408787605e-16	2.46745997988994	0.013608807013478	0.5465469069005	-4.517
GIMAP4	1.38381558345575	-1.70804e-17	2.46692040228859	0.0136293296192439	0.5465469069005	-4.51704
CACNA1D	1.38374122838828	-1.32373e-16	2.46678784992022	0.0136343753736353	0.5465469069005	-4.51705
PTPN14	1.3821900609866	4.09928501400058e-16	2.46402259235534	0.0137400149523956	0.5465469069005	-4.51726
GIMAP7	1.38191241816516	6.14892752100087e-16	2.46352764003008	0.013758999422903	0.5465469069005	-4.5173
PTPRZ1	1.38146406354131	8.54017711250121e-16	2.46272836071696	0.0137897056196029	0.5465469069005	-4.51736
TMEM61	1.38080959246935	-8.19857e-16	2.4615616387495	0.0138346366298923	0.5465469069005	-4.51745
HEY1	1.38043007112129	1.36642833800019e-16	2.46088506813718	0.013860750855167	0.5465469069005	-4.5175
CEACAM6	1.38013121646317	-5.63652e-16	2.46035230158775	0.0138813451617234	0.5465469069005	-4.51754
CCDC85C	-1.37993	2.04964250700029e-16	-2.45999	0.0138951731125664	0.5465469069005	-4.51756
MARCKSL1	1.37976916140277	-3.92848e-16	2.45970686803004	0.0139063308438275	0.5465469069005	-4.51759
IL13RA1	1.37870535584404	-1.53723e-16	2.45781042773245	0.0139799747084524	0.5465469069005	-4.51773
RIMS1	1.3785233924573	3.24526730275046e-16	2.45748604260731	0.0139926058738479	0.5465469069005	-4.51775
STK38	1.37770948246612	8.54017711250121e-17	2.45603508975862	0.0140492276140047	0.5465469069005	-4.51786
PMP22	1.37647962324737	-4.44089e-16	2.45384262651788	0.014135169596786	0.5465469069005	-4.51803
COL1A1	1.37560963552315	-3.58687e-16	2.45229170420405	0.0141962437667203	0.5465469069005	-4.51815
SLC39A11	1.37537617751488	6.14892752100087e-16	2.45187551990135	0.0142126723685442	0.5465469069005	-4.51818
CHST9	1.37463095315331	-6.66134e-16	2.45054701254544	0.0142652266132778	0.5465469069005	-4.51828
SNCA	1.37386648760685	-5.80732e-16	2.44918420403544	0.0143193158371526	0.5465469069005	-4.51838
ANAPC7	1.37221466194001	2.8182584471254e-16	2.44623950353685	0.0144368077782646	0.5465469069005	-4.5186
IGFBP6	1.3720716623385	-5.12411e-17	2.44598457893656	0.0144470190055662	0.5465469069005	-4.51862
MS4A8	1.37150264463341	2.73285667600039e-16	2.44497019421454	0.0144877141959564	0.5465469069005	-4.5187
JCHAIN	1.37148686042461	7.68615940125108e-17	2.44494205579263	0.0144888444955183	0.5465469069005	-4.5187
PRR15	1.37129512188637	5.46571335200077e-16	2.44460024455886	0.0145025810104204	0.5465469069005	-4.51873
PSCA	1.3710372978164	4.2700885562506e-16	2.44414062301247	0.0145210701213347	0.5465469069005	-4.51876
USP19	1.37043137144188	8.02776648575113e-16	2.44306044140918	0.0145646042303483	0.5465469069005	-4.51884
RAD9A	1.36999373829723	5.46571335200077e-16	2.44228027521784	0.0145961184729886	0.5465469069005	-4.5189
ITGA9	-1.36921	-1.19562e-16	-2.44089	0.014652357657633	0.5465469069005	-4.51901
LY75	1.36871711564626	5.12410626750072e-16	2.44000444706462	0.0146883926145746	0.5465469069005	-4.51907
HCAR1	1.36697266163032	-2.73286e-16	2.43689461851938	0.0148153127657816	0.5465469069005	-4.51931
FBLN2	1.36669605302718	-1.1273e-15	2.43640150988937	0.0148355263292692	0.5465469069005	-4.51934
ACOXL	-1.36508	7.17374877450101e-16	-2.43352	0.0149542832375392	0.5465469069005	-4.51956
BACE2	1.36478184093388	3.07446376050043e-16	2.43298905455665	0.0149760772983795	0.5465469069005	-4.5196
SLC1A4	1.3636846205767	-2.90366e-16	2.43103304588231	0.0150571684588962	0.5465469069005	-4.51975
FBXO16	1.36342637642353	1.4176694006752e-15	2.43057267545589	0.0150763103821778	0.5465469069005	-4.51978
UAP1L1	-1.36298	-7.68616e-16	-2.42978	0.015109271497258	0.5465469069005	-4.51984
IGFBP3	1.36135861819406	5.12410626750072e-17	2.42688649427376	0.0152303540060883	0.5465469069005	-4.52006
BMPR1B	1.35823762887991	-3.41607e-17	2.42132272385056	0.0154654857697439	0.5465469069005	-4.52047
MGP	1.35794473393176	2.56205313375036e-17	2.4208005816432	0.0154877152655921	0.5465469069005	-4.52051
SEC14L1	1.35638044345663	-6.31973e-16	2.4180119296477	0.0156069151148602	0.5465469069005	-4.52072
XAF1	1.35570472013988	-2.13504e-17	2.41680732142076	0.0156586547831857	0.5465469069005	-4.52081
GTF2H2C	-1.35545	-8.28397e-16	-2.41635	0.0156784429214912	0.5465469069005	-4.52084
EPPIN	1.35515245612258	-1.19562e-16	2.4158228034055	0.0157010532629295	0.5465469069005	-4.52088
CD82	1.35507063039015	-5.12411e-16	2.41567693312395	0.0157073437804246	0.5465469069005	-4.52089
TSPAN19	1.3546511697317	5.29490980975075e-16	2.41492916292346	0.0157396254861217	0.5465469069005	-4.52095
WIPI1	1.35394551273219	-3.58687e-16	2.4136711920855	0.0157940645551291	0.5465469069005	-4.52104
CAPSL	1.35326894696133	3.75767792950053e-16	2.41246508202027	0.0158464147719885	0.5465469069005	-4.52113
MTCL1	-1.35322	-5.12411e-17	-2.41237	0.0158505696541645	0.5465469069005	-4.52114
DUSP23	1.3521828355042	2.04964250700029e-16	2.41052887712072	0.015930773302606	0.5465469069005	-4.52128
COL3A1	1.35145867154132	2.22044604925031e-16	2.4092379140213	0.0159872384697133	0.5465469069005	-4.52137
ATP9A	1.34972656705408	5.12410626750072e-16	2.40615010091271	0.0161230100163533	0.5465469069005	-4.5216
ZNF844	1.34905747469663	-1.53723e-16	2.40495731366032	0.0161757277787355	0.5465469069005	-4.52169
EHBP1L1	1.34844073575355	-1.10168e-15	2.40385785655075	0.0162244547366844	0.5465469069005	-4.52177
ZNF260	1.34805447762607	3.75767792950053e-16	2.40316927631895	0.0162550376489969	0.5465469069005	-4.52182
VPS13B	1.34787367876307	-9.39419e-16	2.40284696718384	0.0162693702297299	0.5465469069005	-4.52184
GABRP	1.3470778592149	3.41607084500048e-16	2.40142826406806	0.0163325898296971	0.5465469069005	-4.52195
ZNF432	1.3468247601952	3.58687438725051e-16	2.40097706584268	0.0163527411077588	0.5465469069005	-4.52198
ST6GALNAC1	1.34682319803911	5.6365168942508e-16	2.40097428099565	0.0163528655515498	0.5465469069005	-4.52198
PIGU	1.34651351476095	-6.66134e-16	2.40042221032506	0.0163775518426442	0.5465469069005	-4.52202
CDC14B	1.34596633491745	-1.02482e-16	2.39944675583836	0.0164212501271355	0.5465469069005	-4.5221
FES	1.34575738123865	4.78249918300067e-16	2.39907425526853	0.0164379643657013	0.5465469069005	-4.52212
MTMR1	1.34483266466992	-7.68616e-16	2.39742576814568	0.0165121121360496	0.5465469069005	-4.52225
UNC5B	1.34415531061436	-2.04964e-16	2.39621825280966	0.016566611560698	0.5465469069005	-4.52233
FMO2	1.34401802644909	-2.04964e-16	2.39597351708602	0.0165776765808948	0.5465469069005	-4.52235
REEP1	1.34324846348361	1.36642833800019e-16	2.39460162143525	0.016639823134504	0.5465469069005	-4.52245
LBH	1.3431595480691	6.49053460550092e-16	2.39444311241661	0.0166470167238483	0.5465469069005	-4.52247
CAPN5	1.34312177687617	3.24526730275046e-16	2.39437577791945	0.0166500733808495	0.5465469069005	-4.52247
RAMP2	1.3425006835192	5.12410626750072e-16	2.39326855822027	0.0167004064710907	0.5465469069005	-4.52255
SAMHD1	1.34245950493948	-5.46571e-16	2.39319514939351	0.0167037482797245	0.5465469069005	-4.52256
ABCA13	1.34232242719636	-1.70804e-17	2.39295078165749	0.016714876924895	0.5465469069005	-4.52258
ACAD10	1.34076382409599	1.4432899320127e-15	2.39017226851358	0.0168418705220781	0.5465469069005	-4.52278
MMP7	1.3392749181966	2.22044604925031e-16	2.38751800418514	0.0169639754334346	0.5465469069005	-4.52298
DCLK1	1.33927392450314	-6.83214e-16	2.3875162327333	0.016964057184806	0.5465469069005	-4.52298
AP5Z1	-1.33869	5.16680715306323e-16	-2.38648	0.0170120442587411	0.5465469069005	-4.52305
C5ORF30	-1.33864	-2.73286e-16	-2.38639	0.0170159984641313	0.5465469069005	-4.52306
PYCR1	-1.33773	-2.04964e-16	-2.38476	0.0170917666408624	0.5465469069005	-4.52318
TMC5	1.33734350665983	2.56205313375036e-16	2.38407488749948	0.0171235272965209	0.5465469069005	-4.52323
PAX9	1.33722587402151	-3.41607e-16	2.38386518444446	0.0171332871998223	0.5465469069005	-4.52324
LUM	1.33703542036642	1.19562479575017e-16	2.38352566376478	0.0171490993629653	0.5465469069005	-4.52327
CALCRL	1.33657727068858	4.35549032737561e-16	2.38270892286298	0.0171871890854912	0.5465469069005	-4.52333
ZDHHC15	-1.33565	-7.42995e-16	-2.38105	0.017264861586963	0.5465469069005	-4.52345
PFKP	1.33531631057321	-5.97812e-16	2.38046101622551	0.0172924064681087	0.5465469069005	-4.52349
TCF4	1.3341146989993	-7.85696e-16	2.37831890990532	0.0173931969207383	0.5465469069005	-4.52365
MFSD6	1.33341627192911	-2.73286e-16	2.37707382782245	0.0174520169858329	0.5465469069005	-4.52374
FBLIM1	1.33124905557528	3.24526730275046e-16	2.37321034319101	0.0176356471085781	0.5465469069005	-4.52402
NME6	1.33122348990133	-5.12411e-16	2.37316476740516	0.0176378233790371	0.5465469069005	-4.52403
C17ORF49	-1.33037	-7.08835e-16	-2.37164	0.0177106513410221	0.5465469069005	-4.52414
CEP131	1.33023873195656	2.22044604925031e-16	2.37140924485266	0.0177218299630743	0.5465469069005	-4.52416
NT5DC2	1.33001874714814	-2.56205e-17	2.37101707914895	0.0177406440150214	0.5465469069005	-4.52418
GBP3	1.32994125560804	8.62557888362622e-16	2.37087893540815	0.0177472755942409	0.5465469069005	-4.52419
PLAC8	1.3291735177498	1.70803542250024e-16	2.36951	0.0178130946112232	0.5465469069005	-4.52429
DDX60	1.32911799476593	-4.7825e-16	2.36941131284913	0.0178178629410836	0.5465469069005	-4.5243
TMEM116	-1.32879	-3.84308e-16	-2.36883	0.0178458958053613	0.5465469069005	-4.52434
CCDC60	1.32825883313542	-4.27009e-16	2.36787969015279	0.0178917906707681	0.5465469069005	-4.52441
C19ORF18	-1.32816	-9.83722e-16	-2.3677	0.0179003272649602	0.5465469069005	-4.52443
CHD6	1.32802754130384	1.16146408730016e-15	2.36746736748131	0.0179117383431836	0.5465469069005	-4.52444
RANBP6	-1.32754	-4.74514e-16	-2.3666	0.0179536719907901	0.5465469069005	-4.52451
FAM217B	1.32642405545439	1.70803542250024e-16	2.36460884210836	0.0180505668790514	0.5465469069005	-4.52465
PSD3	1.3262209907805	-3.58687e-16	2.36424683983508	0.0180682151164982	0.5465469069005	-4.52468
METAP1D	1.32593267823543	-6.83214e-17	2.36373286665241	0.0180932981584796	0.5465469069005	-4.52472
SLC4A4	1.3258942563617	2.64745490487537e-16	2.36366437219018	0.0180966431433334	0.5465469069005	-4.52472
EML6	1.32579376493753	1.87883896475026e-16	2.36349	0.0181053944261075	0.5465469069005	-4.52473
AR	1.32575209732588	-4.7825e-16	2.36341094606172	0.018109024131552	0.5465469069005	-4.52474
SEC14L6	-1.32489	1.70803542250024e-17	-2.36188	0.0181839565741313	0.5465469069005	-4.52485
ZNF654	1.32365112070481	8.54017711250121e-18	2.35966554663623	0.0182928703146253	0.5465469069005	-4.52501
PLSCR4	1.32342686425265	1.19562479575017e-16	2.35926576589681	0.0183125900845915	0.5465469069005	-4.52504
CCDC144A	1.32321370099746	3.544173501688e-16	2.35888576093839	0.0183313516346847	0.5465469069005	-4.52507
EVA1B	1.32313684896306	-1.16146e-15	2.35874875724087	0.0183381198872158	0.5465469069005	-4.52508
LRRC26	1.32247161799362	-4.9533e-16	2.35756285366357	0.0183967973394271	0.5465469069005	-4.52516
NPHP3	1.32245988732803	-6.66134e-16	2.35754194147077	0.0183978335289521	0.5465469069005	-4.52517
BAALC	1.32227041719462	7.00294523225099e-16	2.35720417410978	0.0184145768236394	0.5465469069005	-4.52519
DIP2C	1.32209587107831	-1.53723e-16	2.35689301171169	0.0184300130983781	0.5465469069005	-4.52521
TMTC2	1.32179722468775	5.35896113809451e-16	2.35636061643968	0.0184564506539031	0.5465469069005	-4.52525
KLHDC7A	1.32118002253921	2.56205313375036e-17	2.35526033357631	0.0185111934349954	0.5465469069005	-4.52533
CXCL14	1.32041028766623	-3.92848e-16	2.35389	0.0185796641856376	0.5465469069005	-4.52543
GPSM3	1.31855935892125	-7.38725e-16	2.35058849101001	0.0187452189793218	0.5465469069005	-4.52567
PLPP2	1.31834115566787	1.70803542250024e-16	2.35019950127465	0.0187648207671418	0.5465469069005	-4.5257
MCM3AP	1.31767448246436	2.98906198937542e-16	2.34901102663463	0.0188248209412636	0.5465469069005	-4.52578
SIX1	1.31645934107144	-3.41607e-16	2.34684480078077	0.0189346146681304	0.5465469069005	-4.52594
PLK2	1.31581233867915	1.02482125350014e-16	2.34569139318732	0.0189933025140771	0.5465469069005	-4.52602
ARHGAP11B	-1.31578	-9.05259e-16	-2.34563	0.018996389023752	0.5465469069005	-4.52603
CRTAC1	-1.31567	-4.44089e-16	-2.34543	0.0190063825343447	0.5465469069005	-4.52604
TRIM14	1.31566476430313	-7.25915e-16	2.34542831316178	0.0190067108438403	0.5465469069005	-4.52604
NDRG2	1.31563505262877	-1.24687e-15	2.3453753463239	0.0190094113912737	0.5465469069005	-4.52605
INHBB	1.3147373633801	1.87883896475026e-16	2.34377504065533	0.0190911623295048	0.5465469069005	-4.52616
CADM2	-1.3147	7.51535585900106e-16	-2.34371	0.0190944799884367	0.5465469069005	-4.52617
ABCF3	1.31430606147494	8.54017711250121e-18	2.34300616112969	0.0191305494096712	0.5465469069005	-4.52622
CCDC88B	1.31390097193707	-5.63652e-16	2.34228401024652	0.0191676074126627	0.5465469069005	-4.52627
SLC25A5	-1.31387	1.53723188025022e-16	-2.34223	0.0191705078733014	0.5465469069005	-4.52627
BCKDHA	-1.3137	9.5436479232201e-16	-2.34192	0.0191862495876825	0.5465469069005	-4.5263
DEGS2	1.3133928448122	-5.63652e-16	2.34137817482577	0.0192141801078081	0.5465469069005	-4.52634
TMPRSS4	1.31189415417714	-3.41607e-17	2.33870646730306	0.0193521200374745	0.5465469069005	-4.52653
VSTM4	-1.31173	9.9066054505014e-16	-2.33842	0.0193672054193639	0.5465469069005	-4.52655
PRMT7	1.31156478451666	4.2700885562506e-16	2.33811930182736	0.019382551046936	0.5465469069005	-4.52657
CPXM2	1.31150811757942	-1.19562e-16	2.33801828199113	0.0193877908128979	0.5465469069005	-4.52658
FAH	-1.31147	-5.46571e-16	-2.33795	0.0193915067525628	0.5465469069005	-4.52658
ACOT2	-1.311	1.83613807918776e-16	-2.33711	0.0194348929140405	0.5465469069005	-4.52664
TSPAN6	1.31097321223691	8.54017711250121e-17	2.33706470918959	0.0194373123938368	0.5465469069005	-4.52665
NDNF	1.31015595712668	-2.51935e-16	2.33560779301564	0.0195131873569047	0.5465469069005	-4.52675
MAP3K15	-1.30912	-8.54018e-17	-2.33376	0.0196098171170261	0.5465469069005	-4.52688
KRT80	1.30903697160404	6.49053460550092e-16	2.33361298370097	0.0196174949487562	0.5465469069005	-4.52689
TBC1D9	1.30874012791242	3.24526730275046e-16	2.33308380209042	0.0196452471947244	0.5465469069005	-4.52693
PKIG	1.3086412178569	5.80732043650082e-16	2.33290747568041	0.0196545020187533	0.5465469069005	-4.52695
TEKT1	1.30820926391677	1.70803542250024e-16	2.33213743377563	0.0196949637604804	0.5465469069005	-4.527
EIF4EBP1	-1.3078	4.2700885562506e-16	-2.3314	0.0197338347747114	0.5465469069005	-4.52705
GPC1	1.30775397029839	-4.6117e-16	2.33132578435526	0.0197376904915511	0.5465469069005	-4.52706
ARHGEF6	1.30755866866821	3.07446376050043e-16	2.33097762121716	0.0197560432387865	0.5465469069005	-4.52708
DPAGT1	1.30745081313554	2.1350442781253e-16	2.3307853477544	0.0197661849486469	0.5465469069005	-4.5271
SPEF1	1.30721932158938	4.78249918300067e-16	2.33037266905285	0.0197879675660347	0.5465469069005	-4.52713
LTBP1	1.30651555971916	-1.70804e-17	2.3291180766514	0.0198543180911435	0.5465469069005	-4.52722
OAZ1	-1.30638	-6.14893e-16	-2.32887	0.0198672345696541	0.5465469069005	-4.52724
PEBP4	-1.30566	4.9533027252507e-16	-2.32759	0.0199355360873506	0.5465469069005	-4.52733
ITIH5	1.30546475308259	-4.27009e-16	2.32724480946059	0.0199537494525226	0.5465469069005	-4.52735
DNAAF5	1.30474597021536	5.80732043650082e-16	2.32596343921069	0.0200220135581868	0.5465469069005	-4.52744
DNAJA4	1.3046382829727	-2.22045e-16	2.32577146575761	0.0200322583474743	0.5465469069005	-4.52746
ZDHHC13	1.30446852930081	4.2700885562506e-16	2.32546884682373	0.020048417096289	0.5465469069005	-4.52748
RND1	-1.30426	5.29490980975075e-16	-2.32509	0.0200684698413174	0.5465469069005	-4.52751
SPP1	1.30342328301319	8.54017711250121e-17	2.3236054920363	0.0201481643588023	0.5465469069005	-4.52761
TRIM22	1.30201387005312	-4.6117e-16	2.32109293933202	0.0202833493687621	0.5465469069005	-4.52779
SLC6A9	-1.30139	1.28102656687518e-16	-2.31998	0.0203436112071635	0.5465469069005	-4.52787
C8ORF76	1.30121187304164	5.97812397875084e-17	2.3196632236865	0.0203606262933919	0.5465469069005	-4.52789
CD84	1.30031443847557	2.22044604925031e-16	2.31806337203919	0.0204474035375383	0.5465469069005	-4.52801
SCGB3A1	1.2998313560128	0	2.3172021835993	0.0204942485153525	0.5465469069005	-4.52807
RTP4	1.29977076983412	5.97812397875084e-17	2.31709	0.0205001302166729	0.5465469069005	-4.52808
MOXD1	1.29971955052573	6.23432929212588e-16	2.31700286857465	0.0205051037312753	0.5465469069005	-4.52808
RHBDL2	1.29907213085434	1.36642833800019e-16	2.31584871710007	0.0205680604695502	0.5465469069005	-4.52817
PLEKHS1	1.29856797739968	-2.39125e-16	2.31494996551925	0.0206172023072222	0.5465469069005	-4.52823
ZNF606	1.29723345479533	-3.75768e-16	2.31257091943873	0.0207477780014962	0.5465469069005	-4.5284
TFPT	1.29681706333214	5.12410626750072e-16	2.31182862067569	0.0207886669074142	0.5465469069005	-4.52845
CD99	1.29681646223196	6.49053460550092e-16	2.31182754909771	0.0207887259851286	0.5465469069005	-4.52845
GCLC	1.29552022474036	-2.98906e-16	2.30951675367637	0.0209164645602781	0.5465469069005	-4.52862
CLEC2B	1.29542825736608	2.04964250700029e-16	2.30935280394587	0.0209255534786742	0.5465469069005	-4.52863
ZNF559	1.29392367828583	-1.70804e-16	2.30667059912443	0.0210747369886401	0.5465469069005	-4.52882
MMP14	1.29388768426219	-5.80732e-16	2.30660643277717	0.0210783172242147	0.5465469069005	-4.52882
PMEPA1	1.29382687956807	-5.12411e-16	2.3064980365846	0.0210843665189304	0.5465469069005	-4.52883
ZNF500	1.29354359063329	5.46571335200077e-16	2.30599301896425	0.0211125701139916	0.5465469069005	-4.52887
LRWD1	1.2934475057905	7.00294523225099e-16	2.30582172904538	0.0211221435619504	0.5465469069005	-4.52888
XBP1	1.29342280392902	3.58687438725051e-16	2.30577769317326	0.0211246053518701	0.5465469069005	-4.52888
BPIFB1	1.29272309387569	-2.22045e-16	2.30453032392343	0.0211944424257346	0.5465469069005	-4.52897
NAGS	-1.29206	-1.79344e-16	-2.30335	0.0212605366431301	0.5465469069005	-4.52906
NUDT13	-1.29139	-3.07446e-16	-2.30216	0.02132787016541	0.5465469069005	-4.52914
SERPIND1	1.2912883673078	-7.25915e-16	2.3019726447902	0.0213382696991981	0.5465469069005	-4.52915
SPARCL1	1.29114925669566	-1.53723e-16	2.3017246530698	0.02135226024418	0.5465469069005	-4.52917
LDLRAD1	1.29098041291418	-2.39125e-16	2.30142365619253	0.0213692518265085	0.5465469069005	-4.52919
SEMA3E	1.2908740073705	-5.63652e-16	2.30123396761715	0.0213799659887546	0.5465469069005	-4.52921
ERN1	-1.29008	3.92848147175055e-16	-2.29981	0.0214605339708269	0.5465469069005	-4.52931
IFI44	1.28979620986558	5.97812397875084e-16	2.29931258395432	0.0214887552694303	0.5465469069005	-4.52934
ZNF710	-1.28906	-3.41607e-17	-2.29801	0.0215629799850496	0.5465469069005	-4.52943
CA2	-1.28896	6.14892752100087e-16	-2.29781	0.0215739103454552	0.5465469069005	-4.52945
FAIM	1.28868580113169	3.07446376050043e-16	2.29733306443361	0.0216013399813956	0.5465469069005	-4.52948
SPA17	1.28828795356436	1.19562479575017e-16	2.29662382377135	0.0216418026432469	0.5465469069005	-4.52953
ZFC3H1	-1.28778	8.00107843227457e-16	-2.29572	0.0216932136781149	0.5465469069005	-4.5296
SPG7	1.28679164585912	1.02482125350014e-15	2.29395636428449	0.0217945742798218	0.5465469069005	-4.52972
ASRGL1	-1.2856	-1.70804e-16	-2.29184	0.0219164254877161	0.5465469069005	-4.52987
TSPAN1	1.28548054528242	2.04964250700029e-16	2.29161907252338	0.0219292070263217	0.5465469069005	-4.52989
WDR35	1.28472	-3.58687e-16	2.29026917230096	0.0220072931959159	0.5465469069005	-4.52998
ARMC9	-1.28395	-1.05898e-15	-2.28889	0.0220875454068198	0.5465469069005	-4.53008
TPCN1	1.28385587332851	-2.56205e-16	2.28872277879896	0.0220970428604671	0.5465469069005	-4.53009
TMEM107	1.28371322254689	6.49053460550092e-16	2.28846847603796	0.0221118325391914	0.5465469069005	-4.53011
THADA	1.28349150826553	-3.58687e-16	2.28807322721239	0.0221348364157791	0.5465469069005	-4.53014
ALDOC	-1.28306	-2.04964e-16	-2.28731	0.0221794640941961	0.5465469069005	-4.53019
AEBP1	1.2829963395109	-2.98906e-16	2.28719049260672	0.0221862876208727	0.5465469069005	-4.5302
RPAP3	1.28275745705911	6.31973106325089e-16	2.28676463817849	0.0222111462086254	0.5465469069005	-4.53023
DST	1.28274993048263	3.41607084500048e-17	2.28675122059214	0.0222119298327527	0.5465469069005	-4.53023
CNTD1	1.28230590313756	-5.12411e-16	2.28595965549502	0.022258201991531	0.5465469069005	-4.53029
ACADL	-1.28109	5.80732043650082e-16	-2.28379	0.0223854348948283	0.5465469069005	-4.53044
TGDS	1.28086059632787	-1.11022e-15	2.28338311502314	0.0224093986057656	0.5465469069005	-4.53047
CORO2A	1.27982325525995	8.19857002800116e-16	2.28153385282724	0.0225184667425682	0.5465469069005	-4.5306
TAGLN	1.27950074774565	-3.03176e-16	2.28095892046166	0.0225524697296217	0.5465469069005	-4.53064
SULT2B1	1.27896802861499	3.07446376050043e-16	2.28000924500792	0.0226087337365374	0.5465469069005	-4.5307
BASP1	1.27864330349906	-1.33227e-15	2.27943035933616	0.0226430899265306	0.5465469069005	-4.53074
G0S2	-1.27846	-1.00774e-15	-2.27911	0.0226621717755496	0.5465469069005	-4.53077
ADAM28	1.27838101174947	-5.12411e-17	2.27896277328194	0.0226708737301373	0.5465469069005	-4.53078
CHN1	1.27822565908892	1.02482125350014e-16	2.27868582695149	0.0226873437528472	0.5465469069005	-4.5308
DNAJB13	1.27786234854769	-3.41607e-17	2.27803815525504	0.0227259014426286	0.5465469069005	-4.53084
GK5	1.27775330566207	3.33066907387547e-16	2.27784376510472	0.02273748513093	0.5465469069005	-4.53086
ABI3BP	1.27758833870899	-7.85696e-16	2.27754967942805	0.0227550194169718	0.5465469069005	-4.53088
TNS3	1.27729583594611	-3.33067e-16	2.27702823636722	0.0227861383306965	0.5465469069005	-4.53091
ACTR8	1.27709774001239	-5.44436e-17	2.27667509183962	0.022807234443554	0.5465469069005	-4.53094
CYP4X1	1.27700165747433	-4.9533e-16	2.27650380602938	0.0228174728083627	0.5465469069005	-4.53095
WDR75	1.27520789991204	8.54017711250121e-18	2.27330608432421	0.0230093465151918	0.5465469069005	-4.53117
GNE	1.27515179807552	-3.24527e-16	2.2732060718899	0.0230153701194392	0.5465469069005	-4.53118
CD24	1.27462549235972	5.12410626750072e-16	2.27226782959542	0.0230719458205889	0.5465469069005	-4.53125
STK11IP	1.27384454274985	-2.30585e-16	2.27087563503657	0.0231561172558723	0.5465469069005	-4.53134
PLEKHA2	1.27378753042362	5.12410626750072e-17	2.27077399947731	0.0231622725250138	0.5465469069005	-4.53135
C4ORF47	1.27376754997924	-3.41607e-17	2.27073838044938	0.0231644300265117	0.5465469069005	-4.53135
ELN	1.27373254557511	5.72191866537581e-16	2.27067597829136	0.0231682102457077	0.5465469069005	-4.53136
STEAP2	1.2735667504409	1.02482125350014e-16	2.27038041622075	0.0231861221835116	0.5465469069005	-4.53138
GSTA4	-1.27252	7.51535585900106e-16	-2.26852	0.0232989986289488	0.5465469069005	-4.53151
IQCK	1.27234109123444	-1.87884e-16	2.26819544031876	0.0233189116129092	0.5465469069005	-4.53153
FAM53B	1.27210316351071	-7.00295e-16	2.26777128787896	0.0233447653761142	0.5465469069005	-4.53156
SOX2	1.27182987227866	-2.56205e-16	2.26728409310809	0.0233744925201025	0.5465469069005	-4.53159
NYNRIN	1.27151654792944	-2.90366e-16	2.26672553152022	0.0234086146774831	0.5465469069005	-4.53163
UACA	1.27091471746752	3.92848147175055e-16	2.26565265167772	0.023474277494466	0.5465469069005	-4.53171
SH3BP4	1.27062830457152	-2.90366e-16	2.26514206498895	0.0235055827248604	0.5465469069005	-4.53174
STXBP6	1.27056664087619	-1.87884e-16	2.26503213745965	0.0235123273696188	0.5465469069005	-4.53175
SLC44A5	1.27005125429911	-1.53723e-16	2.2641133606535	0.0235687649779323	0.5465469069005	-4.53182
CYP51A1	-1.26959	-4.9533e-16	-2.26329	0.0236195430802673	0.5465469069005	-4.53187
RNASE1	1.26929542210595	7.51535585900106e-16	2.26276594277477	0.0236517452842695	0.5465469069005	-4.53191
GSTM3	1.26898171197326	-3.07446e-16	2.26220669345284	0.0236862608488593	0.5465469069005	-4.53195
FZD4	1.26706229628245	5.12410626750072e-17	2.25878496169556	0.0238983953117491	0.5465469069005	-4.53219
IKZF2	1.26683219461756	5.97812397875084e-16	2.25837476072766	0.0239239365047682	0.5465469069005	-4.53222
VSIG2	1.26662939923079	3.07446376050043e-16	2.25801323851104	0.0239464663355529	0.5465469069005	-4.53224
LXN	1.26646140001408	3.75767792950053e-16	2.25771374723474	0.0239651443717814	0.5465469069005	-4.53226
TTC29	1.26540544246256	6.83214169000096e-17	2.25583129753628	0.0240828345342141	0.5465469069005	-4.53239
COL9A2	1.26520035729261	1.02482125350014e-16	2.25546569333582	0.0241057500196073	0.5465469069005	-4.53242
IQCD	1.26475697903891	9.73580190825137e-16	2.2546752853703	0.0241553561513595	0.5465469069005	-4.53247
PUS7L	1.26450416464752	9.05258773925128e-16	2.25422459455024	0.0241836811812464	0.5465469069005	-4.5325
PCSK1N	1.26415584244807	7.088347003376e-16	2.25360364248794	0.0242227539595676	0.5465469069005	-4.53255
ACSM3	-1.26414	-2.04964e-16	-2.25358	0.0242242272716952	0.5465469069005	-4.53255
PTPRN2	1.26411183745005	5.12410626750072e-17	2.25352519502088	0.0242276940783102	0.5465469069005	-4.53255
FBLN1	1.26393994844334	1.02482125350014e-16	2.2532187694374	0.0242469991676763	0.5465469069005	-4.53257
CYBB	1.26371396383832	4.2700885562506e-18	2.25281590792941	0.0242724000966096	0.5465469069005	-4.5326
RARRES1	1.26342999702554	-5.46571e-16	2.2523096818597	0.0243043509924365	0.5465469069005	-4.53264
ANO6	1.26308291293927	-1.49453e-16	2.25169093697493	0.0243434531159723	0.5465469069005	-4.53268
CCDC170	1.26293144961105	8.54017711250121e-16	2.25142092413576	0.0243605338950114	0.5465469069005	-4.5327
SNX9	1.26283453053923	7.68615940125108e-16	2.2512481470414	0.0243714690739283	0.5465469069005	-4.53271
TTC30B	1.26235714121423	4.78249918300067e-16	2.25039710772679	0.0244253940353723	0.5465469069005	-4.53277
TET3	-1.26214	1.23832568131267e-16	-2.25001	0.0244502723932528	0.5465469069005	-4.5328
KNOP1	1.2612103366306	1.70803542250024e-15	2.24835270552564	0.024555357562887	0.5465469069005	-4.53291
EFCAB10	1.26077897368255	7.17374877450101e-16	2.24758371717918	0.0246043973257572	0.5465469069005	-4.53296
FZD6	1.26074310452134	-7.60076e-16	2.24751977342349	0.0246084789520421	0.5465469069005	-4.53297
RNASEK	-1.26063	4.9533027252507e-16	-2.24732	0.0246213580971584	0.5465469069005	-4.53298
ADGRL4	1.26054128629342	1.28102656687518e-16	2.24715999318255	0.0246314552046375	0.5465469069005	-4.53299
CIB1	1.26048035247335	3.41607084500048e-16	2.24705136679785	0.024638395944557	0.5465469069005	-4.533
PLIN4	-1.25987	3.41607084500048e-17	-2.24596	0.0247081919754143	0.5465469069005	-4.53308
SLC7A11	-1.25975	-4.7825e-16	-2.24575	0.024721402038542	0.5465469069005	-4.53309
CDC42EP5	1.258	3.58687438725051e-16	2.24263622428164	0.0249219414730869	0.5465469069005	-4.53331
TSPAN4	-1.25777	-5.46571e-16	-2.24223	0.0249483781487166	0.5465469069005	-4.53333
S100A13	1.25723570567993	-1.07606e-15	2.24126715286892	0.0250104368472495	0.5465469069005	-4.5334
ABTB2	-1.25548	5.46571335200077e-16	-2.23814	0.0252133970487162	0.5465469069005	-4.53362
TLE6	-1.25534	-2.56205e-16	-2.23789	0.0252301752442022	0.5465469069005	-4.53363
GSTA2	1.25533660887157	-5.12411e-17	2.23788164347123	0.0252304418616544	0.5465469069005	-4.53363
GPAT3	-1.25531	8.19857002800116e-16	-2.23784	0.0252333548077693	0.5465469069005	-4.53364
KSR2	-1.25524	6.49053460550092e-16	-2.23771	0.0252415262726456	0.5465469069005	-4.53365
TP53INP2	1.2549266615023	3.50147261612549e-16	2.23715083255885	0.0252781523259107	0.5465469069005	-4.53369
GRHL1	1.25447206263893	-2.39125e-16	2.23634042167439	0.0253311507035737	0.5465469069005	-4.53374
SH3PXD2B	1.25443591897877	-1.70804e-17	2.23627598857093	0.0253353685539831	0.5465469069005	-4.53375
GBP4	1.25404744798217	-6.83214e-16	2.23558346346956	0.0253807402715217	0.5465469069005	-4.53379
C1ORF194	1.25359381916463	1.70803542250024e-17	2.23477478188045	0.0254338111160799	0.5465469069005	-4.53385
AK8	1.25320145634241	3.41607084500048e-17	2.23407531884303	0.0254797917603831	0.5465469069005	-4.5339
CCDC153	1.25247223975757	5.46571335200077e-16	2.23277534846234	0.0255654390657872	0.5465469069005	-4.53399
COL6A3	1.25239022500431	-5.20951e-16	2.2326291412144	0.0255750873539144	0.5465469069005	-4.534
SLC22A4	1.25219265016049	-6.83214e-17	2.2322769256309	0.0255983431688877	0.5465469069005	-4.53402
PLPPR3	1.25168947246211	-1.02482e-16	2.23137991352542	0.0256576530202671	0.5465469069005	-4.53408
SH3BGR	1.25104470592407	1.70803542250024e-17	2.23023049177701	0.0257338257459107	0.5465469069005	-4.53416
ZNF568	1.25081267719636	-2.04964e-16	2.22981685544488	0.0257612854398172	0.5465469069005	-4.53419
SRD5A2	1.25079947787084	-2.04964e-16	2.22979332508013	0.025762848289967	0.5465469069005	-4.53419
TMEM53	-1.25063	-7.17375e-16	-2.22949	0.0257827669744803	0.5465469069005	-4.53421
ZNF561	1.25050636514773	4.18468678512559e-16	2.22927079464655	0.0257975750819339	0.5465469069005	-4.53423
LYPD6B	1.24984159038848	-6.83214e-17	2.22808570435263	0.0258764849171488	0.5465469069005	-4.53431
GPATCH2	1.24925093429429	1.39631895789395e-15	2.22703274499381	0.0259467717679949	0.5465469069005	-4.53438
FAM181A	1.24924695337851	-1.70804e-17	2.22702564823722	0.0259472460481884	0.5465469069005	-4.53438
ALG11	1.24876817346251	-7.21645e-16	2.22617212992372	0.026004341841237	0.5465469069005	-4.53444
VIM	1.24867753294027	7.34455231675104e-16	2.22601054556504	0.0260151631867908	0.5465469069005	-4.53445
CHST6	1.2468916062185	-5.29491e-16	2.22282678385603	0.0262291759494775	0.5465469069005	-4.53467
TMEM237	1.24679677297151	-7.34455e-16	2.22265772515009	0.0262405825118157	0.5465469069005	-4.53468
NUCB2	1.24677408424915	-5.12411e-17	2.22261727808998	0.0262433121514259	0.5465469069005	-4.53468
ZBTB16	1.24507741763117	1.04190160772515e-15	2.2195926398753	0.0264481316102616	0.5465469069005	-4.53489
A4GALT	1.24499138955384	5.97812397875084e-16	2.2194392780967	0.0264585534992664	0.5465469069005	-4.5349
HSD11B2	1.24460395623376	-5.12411e-17	2.21874860285553	0.0265055331701399	0.5465469069005	-4.53495
SLC44A4	1.24426026499347	2.04964250700029e-16	2.21813590637855	0.0265472690335832	0.5465469069005	-4.53499
DHCR7	-1.24343	-2.90366e-16	-2.21666	0.0266479150949761	0.5465469069005	-4.53509
IGFBP7	1.24151395859696	-3.75768e-16	2.21324008112448	0.0268828084022057	0.5465469069005	-4.53532
PPP1R16B	1.24150065334373	1.53723188025022e-16	2.21321636192298	0.0268844428893258	0.5465469069005	-4.53533
KRT7	1.2414134132975	2.73285667600039e-16	2.2130608395741	0.0268951620402401	0.5465469069005	-4.53534
CLSTN3	-1.24119	4.78249918300067e-16	-2.21266	0.0269227998230754	0.5465469069005	-4.53536
E2F1	-1.24059	-2.47665e-16	-2.21158	0.0269970845438759	0.5465469069005	-4.53544
PLA2G4F	-1.23993	-3.41607e-16	-2.21041	0.0270781272204054	0.5465469069005	-4.53552
FAM171A1	1.2399164994569	4.03523368565682e-16	2.21039229953308	0.0270796629483562	0.5465469069005	-4.53552
GPKOW	1.23916911063144	9.73580190825137e-16	2.20905993359935	0.0271721899562449	0.5465469069005	-4.53561
CTSZ	1.23897624170633	5.03870449637571e-16	2.20871610723114	0.0271961114438038	0.5465469069005	-4.53563
CXCL2	-1.2384	7.00294523225099e-16	-2.20769	0.0272673294074528	0.5465469069005	-4.5357
ZBTB1	1.23828975007688	-3.67228e-16	2.2074923023926	0.027281404373182	0.5465469069005	-4.53572
VWF	1.23809953710493	5.42301246643827e-16	2.20715321077744	0.0273050781226492	0.5465469069005	-4.53574
TMTC1	1.23772274044773	1.16146408730016e-15	2.20648149745647	0.0273520262640734	0.5465469069005	-4.53578
AKAP12	1.23753689876364	1.23832568131267e-16	2.20615019851205	0.0273752074179804	0.5465469069005	-4.53581
MORN3	1.23749388378152	9.9066054505014e-16	2.20607351594087	0.0273805753512054	0.5465469069005	-4.53581
ZNF772	1.23717372713863	2.90366021825041e-16	2.20550277446076	0.0274205569369579	0.5465469069005	-4.53585
CRABP2	1.23709328434717	9.05258773925128e-16	2.20535936954046	0.0274306106534389	0.5465469069005	-4.53586
PCOLCE	1.2367558308414	-5.12411e-16	2.20475779303839	0.0274728201529571	0.5465469069005	-4.5359
NME5	1.23541366018945	-1.87884e-16	2.20236511282563	0.0276412571767894	0.5465469069005	-4.53606
APP	1.23520475143299	-5.29491e-16	2.20199269233861	0.0276675543286551	0.5465469069005	-4.53609
SNX1	-1.23469	1.11876320173766e-15	-2.20108	0.0277318716161476	0.5465469069005	-4.53615
FAM160B2	1.23459882726713	-5.25221e-16	2.2009125146727	0.0277439493240421	0.5465469069005	-4.53616
AKR1C3	1.23446611088028	-1.70804e-17	2.20067592190241	0.0277607064858528	0.5465469069005	-4.53618
PFN2	1.23403374106482	-2.56205e-16	2.19990513861898	0.0278153593177933	0.5465469069005	-4.53623
DHRS11	1.23363326107525	-8.07047e-16	2.19919120515212	0.0278660639172462	0.5465469069005	-4.53628
SYNJ2	1.23318912180761	5.12410626750072e-16	2.19839944053124	0.0279223893752444	0.5465469069005	-4.53633
CLDN10	1.23256574626035	2.56205313375036e-17	2.19728815238404	0.0280016110058561	0.5465469069005	-4.53641
FYCO1	1.23251444180198	7.85696294350111e-16	2.19719669220929	0.0280081396494412	0.5465469069005	-4.53641
WDFY3	1.23237677700002	1.53723188025022e-16	2.19695127792671	0.0280256643857254	0.5465469069005	-4.53643
IL15	1.23185869262562	6.83214169000096e-17	2.19602769177218	0.0280917012970368	0.5465469069005	-4.53649
ZNF385A	1.23168502985997	4.09928501400058e-16	2.19571810411842	0.0281138669738018	0.5465469069005	-4.53651
LAP3	1.23163843312383	5.03870449637571e-16	2.19563503637411	0.0281198169741261	0.5465469069005	-4.53652
DNAL1	1.23159999264134	5.29490980975075e-16	2.19556650873816	0.0281247263083182	0.5465469069005	-4.53652
CITED4	-1.23099	8.54017711250121e-17	-2.19447	0.0282032054967809	0.5465469069005	-4.5366
PABPC1L	1.23041313860834	7.00294523225099e-16	2.19345071060468	0.0282766664454745	0.5465469069005	-4.53667
TMEM176B	1.22810385243718	-6.83214e-17	2.18933395889408	0.0285743272337316	0.5465469069005	-4.53694
STX10	-1.22745	5.46571335200077e-16	-2.18817	0.0286587164446369	0.5465469069005	-4.53702
ZNF562	1.22744791119781	-4.6117e-16	2.1881646160673	0.0286593669026079	0.5465469069005	-4.53702
SPATA4	1.22736517214091	1.53723188025022e-16	2.18801711760725	0.0286701090932547	0.5465469069005	-4.53703
CCNO	1.22734289458109	6.14892752100087e-16	2.18797740352433	0.0286730020294408	0.5465469069005	-4.53704
USP46	1.22711558146253	5.12410626750072e-17	2.18757217368259	0.0287025349998668	0.5465469069005	-4.53706
IL1R2	-1.22699	-3.58687e-16	-2.18734	0.0287194354692599	0.5465469069005	-4.53708
CD109	1.22675214362155	6.14892752100087e-16	2.18692427504957	0.0287498079848467	0.5465469069005	-4.53711
DNALI1	1.22599616624151	-5.29491e-16	2.18558	0.0288483540625852	0.5465469069005	-4.5372
CLDN8	1.22575799904603	5.97812397875084e-16	2.18515201900223	0.0288794607336196	0.5465469069005	-4.53723
SLC29A2	-1.22566	-6.83214e-17	-2.18498	0.0288918163191053	0.5465469069005	-4.53724
ZFP3	1.22480280637303	3.15986553162545e-16	2.18344920229652	0.029004507375693	0.5465469069005	-4.53734
ZKSCAN1	1.22472726188375	-4.9533e-16	2.18331452955247	0.0290144169496815	0.5465469069005	-4.53735
ROPN1L	1.22415955480628	2.56205313375036e-16	2.18230248127908	0.0290889793985593	0.5465469069005	-4.53742
TUBA4B	1.22342163017701	-2.39125e-16	2.18098698711564	0.0291861446137046	0.5465469069005	-4.53751
ARL17A	1.22309067454003	-5.63652e-16	2.1803969943284	0.0292298133855941	0.5465469069005	-4.53755
THSD4	1.22264789997881	2.22044604925031e-16	2.17960766256212	0.0292883243029346	0.5465469069005	-4.5376
ABCA1	1.22245795480381	7.82493727932923e-16	2.1792690483471	0.0293134556832079	0.5465469069005	-4.53762
KLHL23	1.22192950107473	-1.02482e-16	2.1783269768012	0.0293834722940225	0.5465469069005	-4.53769
GPLD1	-1.22098	1.19562479575017e-16	-2.17663	0.0295096286701798	0.5465469069005	-4.5378
GALNT6	1.22006376092295	3.41607084500048e-17	2.17500093213108	0.0296318223421234	0.5465469069005	-4.53791
INTU	1.21999300489921	-6.83214e-16	2.17487479575812	0.0296412761498465	0.5465469069005	-4.53792
CALD1	1.21968504390473	-1.79344e-16	2.17432579539313	0.0296824534530073	0.5465469069005	-4.53795
C7ORF57	1.21903226674603	3.07446376050043e-16	2.17316209315549	0.029769898613159	0.5465469069005	-4.53803
CMIP	1.21866064542848	2.22044604925031e-16	2.17249960588395	0.029819779386947	0.5465469069005	-4.53808
TACR1	1.21837494929443	1.96424073587528e-16	2.17199029696277	0.0298581757161377	0.5465469069005	-4.53811
CAPNS1	1.21820988442889	-1.11022e-16	2.17169603673808	0.0298803790898625	0.5465469069005	-4.53813
CSTF2	1.21820699711015	8.54017711250121e-17	2.1716908895309	0.0298807675981119	0.5465469069005	-4.53813
TMEM176A	1.21797556765998	-5.29491e-16	2.17127832152753	0.0299119221221151	0.5465469069005	-4.53816
CCDC146	1.21786495021829	-4.44089e-16	2.1710811244248	0.0299268230596224	0.5465469069005	-4.53817
CFAP126	1.21778237972435	4.2700885562506e-16	2.17093392646102	0.0299379500374877	0.5465469069005	-4.53818
FBXL18	1.21775084425308	2.1350442781253e-16	2.17087770835046	0.0299422006112483	0.5465469069005	-4.53818
ERMARD	1.21760758536269	1.70803542250024e-17	2.17062232151732	0.0299615165892304	0.5465469069005	-4.5382
C1ORF54	1.21729814104812	-6.66134e-16	2.1700706768458	0.0300032763506474	0.5465469069005	-4.53824
RAB40B	1.21714640299156	-2.39125e-16	2.16980017424993	0.0300237717988794	0.5465469069005	-4.53826
AKT3	1.21640223808753	-2.56205e-17	2.16847355558313	0.0301244613946231	0.5465469069005	-4.53834
MARK1	1.21606954311711	5.46571335200077e-16	2.16788046209576	0.0301695706393116	0.5465469069005	-4.53838
CFAP45	1.21535610390941	-9.90661e-16	2.16660861795822	0.0302664997441335	0.5465469069005	-4.53847
GDI1	1.21531568053941	-3.75768e-16	2.16653655543963	0.030271999735146	0.5465469069005	-4.53847
HES4	1.21508160166468	-2.22045e-16	2.16611926432172	0.0303038653204315	0.5465469069005	-4.5385
RBBP9	1.21482885456552	6.83214169000096e-17	2.16566869346314	0.030338304600233	0.5465469069005	-4.53853
CSF3	-1.21467	3.58687438725051e-16	-2.16538	0.0303600600474167	0.5465469069005	-4.53855
KCNJ16	1.21466662019584	-2.73286e-16	2.16537947914781	0.030360428344698	0.5465469069005	-4.53855
ETV7	1.21342239772361	-2.39125e-16	2.1631614106144	0.030530562996066	0.5465469069005	-4.5387
KNDC1	1.2130463890877	1.28102656687518e-16	2.16249110209463	0.0305821391795631	0.5465469069005	-4.53874
TCAF1	1.21303561904915	-1.11022e-16	2.16247190240635	0.0305836175810975	0.5465469069005	-4.53875
GFM2	1.21302492455218	-1.70804e-17	2.16245283738563	0.0305850856737875	0.5465469069005	-4.53875
CX3CL1	1.21290002481344	8.02776648575113e-16	2.1622301793108	0.0306022358326693	0.5465469069005	-4.53876
CCDC34	1.21257019556101	-5.12411e-17	2.16164219452307	0.0306475648595925	0.5465469069005	-4.5388
PCDH7	1.21254820826704	2.56205313375036e-16	2.16160299789549	0.0306505886618833	0.5465469069005	-4.5388
TARBP1	1.21244901788841	1.96424073587528e-16	2.16143	0.0306642330025013	0.5465469069005	-4.53881
SLC35B4	1.21222029855146	1.06058324515874e-15	2.16101843505551	0.0306957148524839	0.5465469069005	-4.53884
SERINC2	1.21200299078427	-5.12411e-17	2.16063104169843	0.0307256516763881	0.5465469069005	-4.53887
ALG10B	1.21166606412064	-9.8212e-16	2.16003040439492	0.0307721170468038	0.5465469069005	-4.53891
CSF3R	-1.21157	-6.83214e-17	-2.15986	0.0307852900359983	0.5465469069005	-4.53892
C11ORF71	-1.21085	-7.25915e-16	-2.15858	0.0308843805344961	0.5465469069005	-4.539
STX11	-1.21082	-1.70804e-17	-2.15853	0.0308887326716189	0.5465469069005	-4.53901
SPTLC2	1.21050077214553	-4.7825e-16	2.15795304482304	0.0309332873007484	0.5465469069005	-4.53905
ATP2B1	-1.21036	6.83214169000096e-17	-2.15769	0.0309534328946104	0.5465469069005	-4.53906
SCGB1A1	1.21019038772013	-1.29811e-15	2.15739972422112	0.0309763382461414	0.5465469069005	-4.53908
BMP5	1.20933458001491	8.54017711250121e-18	2.15587408054889	0.0310953069966946	0.5465469069005	-4.53918
ZC3H12A	-1.20917	1.19562479575017e-16	-2.15558	0.0311185092375593	0.5465469069005	-4.5392
LTC4S	1.20885070102002	-8.02777e-16	2.1550114721356	0.0311627460507076	0.5465469069005	-4.53924
BEND5	1.20830273012408	3.41607084500048e-16	2.15403460744407	0.03123926922225	0.5465469069005	-4.53931
LGR4	1.20820088560111	-3.41607e-17	2.15385304977514	0.0312535093853913	0.5465469069005	-4.53932
AFAP1L1	1.20752652979344	3.41607084500048e-16	2.15265087939908	0.0313479401619217	0.5465469069005	-4.5394
FABP5	-1.20751	-1.45183e-16	-2.15262	0.0313504663104593	0.5465469069005	-4.5394
TDP1	1.20679542592934	3.24526730275046e-16	2.15134754457607	0.031450593880828	0.5465469069005	-4.53948
ZNF442	-1.20676	-5.38031e-16	-2.15128	0.0314555712878565	0.5465469069005	-4.53949
PLXNB1	1.20668257435384	-7.51536e-16	2.15114636469535	0.0314664649448764	0.5465469069005	-4.5395
APOBEC3C	1.20661789078949	-3.41607e-17	2.15103105366222	0.0314755649197797	0.5465469069005	-4.53951
PFN4	1.2065454522837	4.09928501400058e-16	2.15090191793779	0.0314857585742921	0.5465469069005	-4.53951
PIH1D2	1.20649323652141	8.54017711250121e-16	2.15080883318658	0.0314931082104033	0.5465469069005	-4.53952
DSC3	1.2063575378984	8.54017711250121e-17	2.15056692400037	0.0315122153689778	0.5465469069005	-4.53954
IRF4	-1.20623	-1.36643e-16	-2.15035	0.0315296121903457	0.5465469069005	-4.53955
WDR90	1.20601565158582	-2.56205e-16	2.14995744515806	0.0315603990486956	0.5465469069005	-4.53958
FOSB	1.20584095569334	4.44089209850063e-16	2.14964601575481	0.031585044164365	0.5465469069005	-4.5396
IYD	1.20578473877718	3.45877173056299e-16	2.14954579816868	0.0315929784408739	0.5465469069005	-4.5396
TNXB	1.20563030237448	-4.09929e-16	2.14927048524604	0.0316147839018293	0.5465469069005	-4.53962
WDHD1	-1.2053	5.9994744215321e-16	-2.14868	0.0316618296383312	0.5465469069005	-4.53966
DNAAF3	1.20528393882517	-1.19562e-16	2.14865302485853	0.0316637352246973	0.5465469069005	-4.53966
SDCBP2	1.20502719607387	-2.73286e-16	2.14819533097293	0.0317000624364658	0.5465469069005	-4.53969
FUT6	1.20500199513319	8.54017711250121e-17	2.14815040539509	0.0317036301097583	0.5465469069005	-4.5397
CDK14	1.2049315008683	5.55111512312578e-16	2.14802473565818	0.031713611744785	0.5465469069005	-4.5397
WARS	1.20467793885303	1.92153985031277e-16	2.14757271205318	0.0317495371394094	0.5465469069005	-4.53973
C1ORF87	1.20461642548952	1.70803542250024e-16	2.14746305251959	0.0317582577873265	0.5465469069005	-4.53974
VSTM2L	1.20434779297097	-7.00295e-16	2.14698416281155	0.0317963654495133	0.5465469069005	-4.53977
LRMP	1.20404316943313	5.80732043650082e-16	2.1464411121121	0.0318396261561094	0.5465469069005	-4.53981
PHLDA3	1.2039955479217	3.45343411986767e-16	2.14635621750652	0.0318463936207671	0.5465469069005	-4.53981
ZMYND8	1.20372842365855	-2.22045e-16	2.14588001655707	0.0318843773556902	0.5465469069005	-4.53985
PRADC1	1.2036908735892	-2.81826e-16	2.1458130762557	0.0318897199002356	0.5465469069005	-4.53985
SLC25A4	-1.20355	-6.83214e-16	-2.14556	0.0319101382319556	0.5465469069005	-4.53987
FAM81B	1.20231531586523	8.02776648575113e-16	2.14336087709395	0.0320859610469624	0.5465469069005	-4.54001
AKAP14	1.20194283514325	-8.19857e-16	2.14269685776688	0.0321392779996012	0.5465469069005	-4.54006
EYS	-1.20185	4.35549032737561e-16	-2.14253	0.0321524633614205	0.5465469069005	-4.54007
SRF	1.20177792480231	-4.44089e-16	2.14240287301234	0.0321629075323025	0.5465469069005	-4.54008
PPM1L	1.20176498111233	1.22978550420017e-15	2.14237979836767	0.0321647628267388	0.5465469069005	-4.54008
CES4A	1.20165699018101	-1.87884e-16	2.14218728353049	0.0321802453705985	0.5465469069005	-4.54009
TMEM79	1.20068846381605	-4.09929e-16	2.14046069692572	0.0323193876761411	0.5465469069005	-4.5402
APOE	1.20023915440927	-8.11317e-16	2.13965971552632	0.0323841120716914	0.5465469069005	-4.54026
SCNN1B	1.20004597335946	-1.02482e-16	2.13931533273515	0.0324119745122227	0.5465469069005	-4.54028
CEP350	1.20001898391183	2.56205313375036e-17	2.13926721879584	0.0324158688261321	0.5465469069005	-4.54028
KRT19	1.19952222774565	-1.36643e-16	2.13838165432036	0.0324876175117805	0.5465469069005	-4.54034
TTLL7	1.19929988779982	2.90366021825041e-16	2.13798529012619	0.0325197750956751	0.5465469069005	-4.54037
RELT	-1.19916	-1.70804e-16	-2.13774	0.0325396494008263	0.5465469069005	-4.54038
ALDH1L1	1.19877502574301	-4.6117e-16	2.13704962143464	0.0325957953802147	0.5465469069005	-4.54043
ACY1	-1.1977	6.14892752100087e-16	-2.13513	0.0327522682624044	0.5465469069005	-4.54055
CXCR4	1.1975220302187	6.27703017768839e-16	2.13481591322968	0.0327778931377936	0.5465469069005	-4.54058
C12ORF75	1.19670753137684	-6.31973e-16	2.13336391064014	0.0328967307880477	0.5465469069005	-4.54067
CCDC17	1.19634073854783	-4.44089e-16	2.13271003108848	0.0329503672270307	0.5465469069005	-4.54071
ENAH	1.19632623573212	5.80732043650082e-16	2.13268417699898	0.0329524895242668	0.5465469069005	-4.54072
PIP5K1C	1.19594267165766	4.52629386962564e-16	2.13200039944062	0.0330086615950457	0.5465469069005	-4.54076
CCDC160	1.19571058941289	-1.02482e-16	2.13158666770391	0.0330426892884898	0.5465469069005	-4.54079
D2HGDH	1.19550888649539	2.56205313375036e-16	2.13122709302622	0.0330722871752358	0.5465469069005	-4.54081
GPR162	1.1955078632126	3.41607084500048e-17	2.13122526882564	0.033072437389592	0.5465469069005	-4.54081
COL5A1	1.19539846154366	4.5903451979694e-16	2.13103023907431	0.0330885005433761	0.5465469069005	-4.54082
C2ORF74	1.19532863327206	6.83214169000096e-17	2.13090575659995	0.0330987567322882	0.5465469069005	-4.54083
IFI44L	1.19532068266417	2.56205313375036e-16	2.13089158309515	0.0330999246687356	0.5465469069005	-4.54083
DPP3	1.19529685534751	7.088347003376e-16	2.13084910626927	0.033103425089288	0.5465469069005	-4.54084
UBFD1	1.19516285235956	7.17374877450101e-16	2.13061021988231	0.0331231170861045	0.5465469069005	-4.54085
LDHD	-1.19467	-5.12411e-16	-2.12974	0.0331949246958439	0.5465469069005	-4.54091
PIFO	1.19435394962103	6.31973106325089e-16	2.12916819343528	0.0332421999480823	0.5465469069005	-4.54095
FAM98B	1.19406522766425	6.83214169000096e-17	2.12865349039662	0.0332847928675011	0.5465469069005	-4.54098
URB1	1.19354893398818	-5.63652e-16	2.12773309651011	0.0333610741060902	0.5465469069005	-4.54104
PRKACA	1.19353617774245	-4.31279e-16	2.12771035602126	0.0333629607048524	0.5465469069005	-4.54104
SOX4	1.19313076507422	-3.07446e-16	2.12698762909538	0.0334229672198761	0.5465469069005	-4.54109
APOD	1.19248211801975	-1.07606e-15	2.12583128957176	0.033519167737312	0.5465469069005	-4.54116
DNASE1	1.19236355845185	6.23432929212588e-16	2.12561993408447	0.033536776826359	0.5465469069005	-4.54118
BBOX1	1.19188452103983	2.1350442781253e-16	2.12476595673426	0.0336080065789357	0.5465469069005	-4.54123
C9ORF135	1.19178972751986	6.83214169000096e-17	2.12459696884944	0.0336221170858982	0.5465469069005	-4.54125
C7ORF25	-1.19171	1.36642833800019e-16	-2.12445	0.0336344247410366	0.5465469069005	-4.54126
SYTL2	1.19131891584133	1.09314267040015e-15	2.1237576554689	0.0336922749515084	0.5465469069005	-4.5413
MORN5	1.19126919378242	-7.51536e-16	2.12366901622892	0.0336996915739216	0.5465469069005	-4.54131
NOXO1	-1.19122	-2.39125e-16	-2.12358	0.0337067684791184	0.5465469069005	-4.54131
DARS	1.19120646355714	-2.04964e-16	2.12355718740257	0.0337090505073014	0.5465469069005	-4.54131
DMTN	1.19069627092766	-5.63652e-16	2.12264766981815	0.0337852504512236	0.5465469069005	-4.54137
ANKRD23	-1.19031	7.42995408787605e-16	-2.12195	0.0338436197047729	0.5465469069005	-4.54142
SH2D4A	-1.1903	-6.44783e-16	-2.12194	0.0338448004728715	0.5465469069005	-4.54142
CPE	1.19009230682297	-3.75768e-16	2.12157098634246	0.0338756460054697	0.5465469069005	-4.54144
FBXO36	1.18947355319551	1.02482125350014e-15	2.12046793766617	0.033968469489155	0.5465469069005	-4.54152
COL1A2	1.18851054700258	4.61169564075065e-16	2.11875119184159	0.034113369210845	0.5465469069005	-4.54163
CTSK	1.18806839969156	2.22044604925031e-16	2.11796297827079	0.0341800741346192	0.5465469069005	-4.54168
MYB	1.18769722971994	1.70803542250024e-16	2.11730129561115	0.0342361570446178	0.5465469069005	-4.54172
HPN	-1.1875	1.70803542250024e-17	-2.11695	0.0342663201274216	0.5465469069005	-4.54175
TNFRSF14	1.18742246101392	-3.58687e-16	2.11681146695558	0.0342777245905091	0.5465469069005	-4.54175
ARHGAP23	1.18740580129449	1.70803542250024e-16	2.11678176776572	0.0342802462915455	0.5465469069005	-4.54176
TMX3	1.18740171299027	-1.87884e-16	2.11677447956835	0.0342808651425787	0.5465469069005	-4.54176
ATXN7L3	1.18733562495866	-7.00295e-16	2.1166566647992	0.0342908702840583	0.5465469069005	-4.54176
SEMA5A	1.18721695886208	-1.00774e-15	2.11644511940383	0.0343088415409807	0.5465469069005	-4.54178
PLEKHH1	1.18680672121144	-2.98906e-16	2.11571379100844	0.0343710315516729	0.5465469069005	-4.54183
DOCK4	1.18649581194911	-8.36937e-16	2.11515953478264	0.0344182280070669	0.5465469069005	-4.54186
SPESP1	1.18633203738042	-1.21271e-15	2.11486757476302	0.0344431114713489	0.5465469069005	-4.54188
PTAFR	1.18630357496173	-5.63652e-16	2.11481683496634	0.0344474375414944	0.5465469069005	-4.54188
VPS54	1.18603356656704	1.70803542250024e-16	2.1143354924915	0.0344884998501247	0.5465469069005	-4.54192
LSS	-1.18563	3.58687438725051e-16	-2.11362	0.0345492537422742	0.5465469069005	-4.54196
CA5B	1.1852657626125	1.70803542250024e-17	2.11296673261985	0.0346054944603977	0.5465469069005	-4.542
AKR1C1	1.18522951641734	-4.18469e-16	2.11290211672781	0.0346110258668291	0.5465469069005	-4.54201
TWSG1	1.18489656825191	6.57593637662593e-16	2.11230857187108	0.0346618712750287	0.5465469069005	-4.54205
HHAT	1.18489136987863	1.70803542250024e-17	2.11229930475974	0.0346626656381289	0.5465469069005	-4.54205
ZNF26	1.18447225450026	9.50094703765759e-16	2.11155215008814	0.0347267618182864	0.5465469069005	-4.5421
FAM3D	1.18437241719628	-3.75768e-16	2.11137417067741	0.0347420450631547	0.5465469069005	-4.54211
B3GALT4	1.18435318127131	-1.70804e-17	2.11133987890013	0.0347449903874535	0.5465469069005	-4.54211
ANKS6	1.18422522695854	-7.79291e-17	2.11111177545304	0.0347645876437474	0.5465469069005	-4.54213
TNNI2	1.18409829143917	8.71098065475123e-16	2.11088548820331	0.0347840381901224	0.5465469069005	-4.54214
NOTCH3	1.18344798141796	5.12410626750072e-17	2.10972618411807	0.0348838321369121	0.5465469069005	-4.54222
CFAP77	1.18308672749098	-9.39419e-16	2.10908217873647	0.0349393742545968	0.5465469069005	-4.54226
MARCKS	1.18205577809876	-5.46571e-16	2.10724431094557	0.0350982961917452	0.5465469069005	-4.54238
AGR2	1.18189383564522	-1.70804e-16	2.10695561702752	0.0351233157848878	0.5465469069005	-4.5424
ENKUR	1.18167	3.41607084500048e-16	2.10655744217304	0.0351578484968957	0.5465469069005	-4.54242
BHLHE41	1.18120286084985	-4.09929e-16	2.10572382007383	0.0352302403227054	0.5465469069005	-4.54248
SLC2A1	1.18095943496256	-8.54018e-17	2.10528986608822	0.0352679752550068	0.5465469069005	-4.5425
GOLGA8A	1.18094233138654	1.17854444152517e-15	2.10525937563766	0.0352706278811962	0.5465469069005	-4.54251
ZNF232	1.18073605369489	3.58687438725051e-16	2.10489164553535	0.0353026332942925	0.5465469069005	-4.54253
AP1G2	1.18052695362857	-3.07446e-16	2.10451888400131	0.0353351019115388	0.5465469069005	-4.54255
KIF19	1.18047405391593	-3.41607e-17	2.10442457997558	0.0353433201052505	0.5465469069005	-4.54256
DDX11	-1.18002	9.39419482375132e-17	-2.10362	0.0354137863517596	0.5465469069005	-4.54261
COQ2	1.17965790509874	-3.58687e-16	2.10296963598413	0.035470319126543	0.5465469069005	-4.54265
EFCAB1	1.17956331132788	-1.36643e-16	2.10280100419095	0.0354850637923663	0.5465469069005	-4.54266
NAV1	1.17937028524173	3.07446376050043e-16	2.10245689765263	0.035515167675573	0.5465469069005	-4.54269
CEP290	1.17920476708157	3.41607084500048e-16	2.10216182934212	0.0355409988390846	0.5465469069005	-4.54271
KRT4	1.17917736441379	6.83214169000096e-17	2.10211297875753	0.0355452769116871	0.5465469069005	-4.54271
CST3	1.17895407497086	5.29490980975075e-16	2.10171492190012	0.0355801529776384	0.5465469069005	-4.54274
SLC16A3	1.17893729920989	7.85696294350111e-16	2.10168501584364	0.0355827743990209	0.5465469069005	-4.54274
LACTB2	-1.17869	-1.14438e-15	-2.10125	0.0356211151481194	0.5465469069005	-4.54277
DOCK7	1.17761023405659	-8.54018e-17	2.09931926411995	0.0357906675517674	0.5465469069005	-4.54289
ZNF701	1.17754005445142	-2.39125e-16	2.09919415532519	0.0358016904113903	0.5465469069005	-4.5429
ERC2	-1.17632	-7.51536e-16	-2.09701	0.0359944890433285	0.5465469069005	-4.54304
ALDH3A1	1.1763099407714	-2.04964e-16	2.09700123845775	0.0359953706213983	0.5465469069005	-4.54304
FAR2	1.17620836465131	2.22044604925031e-16	2.09682015926915	0.0360114035395146	0.5465469069005	-4.54305
NUDT2	1.17608226311449	-2.98906e-16	2.09659535875551	0.0360313160553393	0.5465469069005	-4.54307
EFHC2	1.17557769890692	4.61169564075065e-16	2.09569587492775	0.0361110850353965	0.5465469069005	-4.54312
PAQR3	1.17539421464942	2.56205313375036e-17	2.09536877855469	0.0361401302489773	0.5465469069005	-4.54315
FGF14	1.17534126991639	-6.31973e-16	2.09527439427137	0.0361485150024458	0.5465469069005	-4.54315
CDKN2A	1.17532888228667	6.49053460550092e-16	2.09525231091225	0.0361504770464338	0.5465469069005	-4.54315
NWD1	1.17530590314552	-4.9533e-16	2.09521134612416	0.0361541168923742	0.5465469069005	-4.54316
ACKR3	1.17504430608854	-6.14893e-16	2.09474499849462	0.0361955753241518	0.5465469069005	-4.54319
SLC1A1	1.17439992638903	-2.73286e-16	2.09359626636114	0.0362978708180387	0.5465469069005	-4.54326
GAS7	1.1743372307323	1.36642833800019e-16	2.09348449915996	0.0363078369155485	0.5465469069005	-4.54327
GRID1	-1.17433	-2.04964e-16	-2.09348	0.0363083164262662	0.5465469069005	-4.54327
FOXC1	1.17430839570162	6.83214169000096e-17	2.09343309510992	0.0363124213130666	0.5465469069005	-4.54327
FAM216B	1.17399931322674	3.41607084500048e-16	2.09288209548801	0.0363615924295583	0.5465469069005	-4.54331
ASXL2	1.17365434638686	-1.28103e-16	2.09226712500669	0.0364165392942932	0.5465469069005	-4.54335
LY86	1.17341298737357	-2.10302e-16	2.09183685562594	0.0364550253991165	0.5465469069005	-4.54337
HECTD4	1.17310256820871	0	2.09128347309419	0.0365045744982543	0.5465469069005	-4.54341
TNC	1.17287774937412	5.97812397875084e-17	2.09088268979871	0.0365404958953342	0.5465469069005	-4.54343
LAMTOR2	1.17282028984376	8.19857002800116e-16	2.0907802570111	0.0365496815701551	0.5465469069005	-4.54344
MCOLN2	-1.17278	-3.41607e-17	-2.09071	0.0365563774627729	0.5465469069005	-4.54345
MLF2	-1.17246	-8.54018e-18	-2.09013	0.0366077539727293	0.5465469069005	-4.54348
CAB39L	1.17230866998446	5.29490980975075e-16	2.08986819511195	0.0366315576367386	0.5465469069005	-4.5435
CIPC	1.17211200144868	9.05258773925128e-16	2.08951759519878	0.0366630726467206	0.5465469069005	-4.54352
EDA2R	1.17187121095554	1.70803542250024e-17	2.08908833931576	0.0367016893983029	0.5465469069005	-4.54355
LIN7B	1.1713832637489	4.09928501400058e-16	2.08821847852385	0.0367800501436094	0.5465469069005	-4.54361
PALM3	-1.17128	1.53723188025022e-16	-2.08803	0.0367967021193835	0.5465469069005	-4.54362
GLIPR2	1.17109704036307	9.39419482375132e-17	2.08770822967382	0.0368260818028266	0.5465469069005	-4.54364
TAGLN2	1.17107783500169	-1.19562e-15	2.08767399238208	0.036829172246465	0.5465469069005	-4.54364
PRKG2	-1.17095	-1.53723e-16	-2.08744	0.0368499960320147	0.5465469069005	-4.54366
PTGER4	1.17087331914196	1.70803542250024e-16	2.08730940308782	0.0368620957567694	0.5465469069005	-4.54366
C19ORF54	-1.17082	-4.7825e-16	-2.08722	0.0368699888335508	0.5465469069005	-4.54367
ST14	1.17073398517948	-1.45183e-15	2.08706	0.0368845404646168	0.5465469069005	-4.54368
C4ORF48	1.17060465097883	-4.8679e-16	2.0868304498364	0.0369053847690644	0.5465469069005	-4.5437
ACE	1.17047054438012	5.38031158087576e-16	2.08659137874311	0.0369270088163076	0.5465469069005	-4.54371
RBSN	1.17019054347687	1.81478763640651e-16	2.08609222267844	0.0369721924077024	0.5465469069005	-4.54374
HFE	1.16999818579183	5.46571335200077e-16	2.08574930769509	0.0370032603361066	0.5465469069005	-4.54376
CFAP100	1.16924030598894	-1.53723e-16	2.08439823955379	0.0371258828762538	0.5465469069005	-4.54385
ANTXR1	1.16908854422769	5.80732043650082e-16	2.08412769469971	0.0371504789779387	0.5465469069005	-4.54387
ATP8A2	-1.16903	-4.09929e-16	-2.08402	0.0371598192241363	0.5465469069005	-4.54388
LGALS9	1.16888309938181	-6.74674e-16	2.08376144930696	0.0371837976245788	0.5465469069005	-4.54389
ALDH1A1	1.16877378294804	6.66133814775094e-16	2.08356657150388	0.0372015367191571	0.5465469069005	-4.5439
AKR1B1	1.16864205217122	2.98906198937542e-16	2.08333173577516	0.0372229226255686	0.5465469069005	-4.54392
EREG	1.1684920050613	-3.41607e-16	2.08306424762054	0.0372472948564922	0.5465469069005	-4.54394
HMGCR	-1.16839	-3.92848e-16	-2.08289	0.0372631153520884	0.5465469069005	-4.54395
ZNF385B	-1.16832	7.51535585900106e-16	-2.08276	0.0372751126582794	0.5465469069005	-4.54396
AGPS	1.16825522176123	7.17374877450101e-16	2.08264213533849	0.0372857833257963	0.5465469069005	-4.54396
MAP9	1.1671084223896	5.80732043650082e-16	2.08059774242876	0.0374726717769389	0.5465469069005	-4.5441
FAM222B	1.16639236648965	4.18468678512559e-16	2.07932123352837	0.0375897678316457	0.5465469069005	-4.54418
PODXL	1.1655857482117	5.46571335200077e-16	2.07788327957661	0.0377220462510063	0.5465469069005	-4.54427
ABLIM1	1.16523596589418	-2.90366e-16	2.07725972456988	0.0377795305079585	0.5465469069005	-4.54431
CDC14A	1.16496657882523	-5.97812e-17	2.07677948972902	0.0378238531551006	0.5465469069005	-4.54434
EDNRB	-1.16403	-3.07446e-16	-2.07512	0.0379776942182387	0.5465469069005	-4.54445
BMP2	-1.16402	-9.90661e-16	-2.07509	0.0379799875721486	0.5465469069005	-4.54445
SCN9A	-1.164	3.41607084500048e-17	-2.07505	0.0379834437123017	0.5465469069005	-4.54445
MAP7D3	1.16398777686109	-2.64745e-16	2.0750345848703	0.0379852693972634	0.5465469069005	-4.54445
CCHCR1	1.16397737369798	5.12410626750072e-16	2.07501603920885	0.0379869881458767	0.5465469069005	-4.54445
IQCA1	1.16392126739175	-5.12411e-17	2.07491601880642	0.0379962588357581	0.5465469069005	-4.54446
KIT	1.16389477963683	4.93195228246945e-16	2.07486879923195	0.0380006361917169	0.5465469069005	-4.54446
SRGAP3	1.16378796924582	4.2700885562506e-16	2.07467838893746	0.0380182919868884	0.5465469069005	-4.54447
ECH1	-1.16337	6.31973106325089e-16	-2.07394	0.038086814576012	0.5465469069005	-4.54452
HID1	1.16318	2.47665136262535e-16	2.07358732325114	0.0381195956302927	0.5465469069005	-4.54454
DHX40	1.16300370856221	-4.27009e-17	2.07328029174572	0.0381481443485263	0.5465469069005	-4.54456
GGA3	1.16294603132093	-4.27009e-16	2.07317747084605	0.0381577090095975	0.5465469069005	-4.54457
MFAP4	1.16240552337729	7.85696294350111e-16	2.07221391031839	0.0382474409889966	0.5465469069005	-4.54463
ITGB2	1.16211584546603	-9.565e-16	2.07169750310495	0.0382956054246847	0.5465469069005	-4.54466
FOCAD	1.16202435731936	2.73285667600039e-16	2.07153440769088	0.0383108277710783	0.5465469069005	-4.54467
APOBEC4	1.16183493051822	-5.80732e-16	2.07119671757808	0.0383423620901758	0.5465469069005	-4.5447
TMEM190	1.16179870824158	-3.41607e-16	2.07113214432546	0.0383483946090637	0.5465469069005	-4.5447
SLC6A8	1.16171883816566	-5.12411e-16	2.07098976038197	0.0383616991569018	0.5465469069005	-4.54471
SLITRK6	1.16171047605945	-4.6117e-16	2.07097485330138	0.0383630923215158	0.5465469069005	-4.54471
ADRA2A	1.16152157030021	-1.49453e-16	2.0706380920471	0.038394576335624	0.5465469069005	-4.54473
C1ORF21	-1.1615	-8.02777e-16	-2.0706	0.0383984810339911	0.5465469069005	-4.54473
CTTNBP2	1.16019913253949	3.75767792950053e-16	2.06828058955063	0.0386155963331107	0.5465469069005	-4.54488
FBXO15	1.16003337437972	3.58687438725051e-16	2.06798509339415	0.0386433757231482	0.5465469069005	-4.5449
GALNT12	1.15982226695443	-9.13799e-16	2.06760875335234	0.0386787797762647	0.5465469069005	-4.54493
ZNF703	1.15924288755292	3.41607084500048e-16	2.06657589689131	0.0387760870284703	0.5465469069005	-4.54499
SHISA5	1.15917881278522	-1.53723e-16	2.06646167115661	0.0387868612012323	0.5465469069005	-4.545
COL5A2	1.15908188360448	-5.38031e-16	2.06628887604113	0.0388031646779454	0.5465469069005	-4.54501
DNMT3A	1.15839673762072	5.29490980975075e-16	2.06506747007772	0.0389185722636649	0.5465469069005	-4.54509
TMEM14A	1.15839015477037	6.49053460550092e-16	2.06505573486674	0.0389196825069892	0.5465469069005	-4.54509
CDHR4	1.15830307505892	-2.04964e-16	2.0649004983458	0.0389343716358778	0.5465469069005	-4.5451
LIMK2	1.15811347148663	1.70803542250024e-17	2.06456249310405	0.0389663713968409	0.5465469069005	-4.54512
ARHGAP31	-1.15798	8.54017711250121e-17	-2.06433	0.038988379429398	0.5465469069005	-4.54513
ATG16L2	1.15795988099801	8.79638242587624e-16	2.06428868818777	0.0389923095360485	0.5465469069005	-4.54514
PXDN	1.15787759990606	1.36642833800019e-16	2.06414200613932	0.0390062110795027	0.5465469069005	-4.54515
CRACR2A	1.15785405766915	-3.07446e-16	2.06410003752353	0.0390101893586744	0.5465469069005	-4.54515
TRMT13	1.15767142810223	-3.58687e-16	2.06377446480265	0.0390410626799999	0.5465469069005	-4.54517
LAG3	1.1575464582997	3.41607084500048e-17	2.06355168182548	0.0390622006405352	0.5465469069005	-4.54518
PLPP1	1.15741258920104	-2.39125e-16	2.06331303412222	0.0390848546510591	0.5465469069005	-4.5452
ADH1C	1.15705237632333	2.73285667600039e-16	2.06267088461342	0.039145867122896	0.5465469069005	-4.54524
HYI	-1.15695	-1.45183e-15	-2.06248	0.0391636591564534	0.5465469069005	-4.54525
CD99L2	1.15671635441734	-1.87884e-16	2.06207186021637	0.0392028550536667	0.5465469069005	-4.54528
TRPV4	1.15662792589847	-5.12411e-17	2.06191421918389	0.0392178638703304	0.5465469069005	-4.54529
RNF152	1.15662301455447	7.68615940125108e-16	2.06190546375806	0.0392186976071007	0.5465469069005	-4.54529
NPTN	1.15641842252979	1.96424073587528e-16	2.06154073868495	0.0392534419833781	0.5465469069005	-4.54531
ERLIN2	1.15581458480552	7.68615940125108e-17	2.06046428050695	0.0393561397991542	0.5465469069005	-4.54538
PLD1	-1.15553	-7.21645e-16	-2.05996	0.0394043342775775	0.5465469069005	-4.54541
CACNA2D1	1.15506477197562	6.4051328343759e-16	2.05912759331387	0.039483981784937	0.5465469069005	-4.54546
CCL21	1.15459447945986	-5.33761e-19	2.05828920544194	0.0395643457264793	0.5465469069005	-4.54552
C5ORF49	1.1543125954426	2.73285667600039e-16	2.0577866923603	0.0396125807967172	0.5465469069005	-4.54555
ORAI2	1.15410709272749	9.39419482375133e-16	2.0574203438044	0.0396477771980888	0.5465469069005	-4.54557
CDHR3	1.15408022826601	-7.00295e-16	2.0573724526772	0.0396523802290776	0.5465469069005	-4.54558
HNF1B	-1.15367	-9.22339e-16	-2.05663	0.0397235579537142	0.5465469069005	-4.54562
VANGL1	1.15345230012849	-9.90661e-16	2.05625304865246	0.0397601004383335	0.5465469069005	-4.54565
EFEMP2	1.15173277953866	-3.67228e-16	2.05318766878833	0.0400563537117809	0.5465469069005	-4.54584
FAM172A	1.15117000587016	-3.41607e-16	2.05218441527587	0.040153718840898	0.5465469069005	-4.5459
UBE2V1	-1.15098	-1.32373e-16	-2.05185	0.0401860523724689	0.5465469069005	-4.54592
KIF12	-1.15021	-5.63652e-16	-2.05047	0.0403206573027553	0.5465469069005	-4.54601
RBM18	1.15003407473308	1.02482125350014e-16	2.05015939710787	0.0403508571988744	0.5465469069005	-4.54603
LMO2	1.14998176431537	6.83214169000096e-17	2.05006614361497	0.0403599552904981	0.5465469069005	-4.54604
C20ORF194	1.1499194669067	-2.56205e-16	2.04995508636839	0.0403707926392729	0.5465469069005	-4.54604
STARD13	-1.14985	-7.85696e-16	-2.04982	0.0403836550143877	0.5465469069005	-4.54605
TUBGCP2	1.14979599449806	1.17000426441267e-15	2.04973497278705	0.0403922793730586	0.5465469069005	-4.54606
NR2F1	1.14964408501845	-7.60076e-16	2.04946416459625	0.0404187280444078	0.5465469069005	-4.54608
LNX1	1.1493022747305	6.83214169000096e-17	2.04885482128263	0.0404782936833189	0.5465469069005	-4.54611
SSBP3	1.14909976365859	-1.70804e-17	2.04849380591255	0.0405136194137896	0.5465469069005	-4.54614
ECI2	1.14890084345649	-2.90366e-16	2.04813919196625	0.0405483442009339	0.5465469069005	-4.54616
B4GALT4	1.14886971265659	1.36642833800019e-16	2.04808369526111	0.0405537808759252	0.5465469069005	-4.54616
ZW10	1.14800757722467	-8.54018e-17	2.04654677118541	0.0407045897101615	0.5465469069005	-4.54626
SENP8	1.14783242029617	-1.36643e-16	2.04623451989581	0.0407352870229276	0.5465469069005	-4.54628
CNST	1.14757243542344	-1.70804e-17	2.04577104629824	0.0407808871224527	0.5465469069005	-4.54631
ZNF43	1.1474573645815	-7.42995e-16	2.04556591014349	0.0408010838037845	0.5465469069005	-4.54632
ITM2A	1.14710135308419	7.68615940125108e-16	2.04493125041233	0.0408636229238447	0.5465469069005	-4.54636
ERO1A	1.14706627336716	9.39419482375132e-17	2.04486871399441	0.0408697896321505	0.5465469069005	-4.54637
CLIC6	1.14690350879201	-1.00774e-15	2.04457855448471	0.0408984125444769	0.5465469069005	-4.54638
KLK13	1.14687570720256	-5.97812e-17	2.04452899274466	0.0409033032822835	0.5465469069005	-4.54639
GMDS	1.14684933753466	-3.41607e-17	2.04448198368325	0.0409079425804799	0.5465469069005	-4.54639
ARMC2	1.14655879020743	-2.56205e-16	2.04396402656675	0.0409590890105616	0.5465469069005	-4.54642
TAZ	-1.14601	6.14892752100087e-16	-2.04299	0.0410550911744114	0.5465469069005	-4.54648
PLXNA1	1.14577209218766	-4.27009e-16	2.0425615843493	0.0410978472674618	0.5465469069005	-4.54651
TP53	1.14540189535947	1.15292391018766e-16	2.04190163650708	0.0411632804720767	0.5465469069005	-4.54655
C9ORF116	1.1453	8.36937357025118e-16	2.04171773424817	0.0411815299224165	0.5465469069005	-4.54656
RPGRIP1L	1.14491584931106	-3.41607e-16	2.04103516489945	0.0412493242959292	0.5465469069005	-4.54661
RFK	1.14481338458468	5.6365168942508e-16	2.0408525015973	0.0412674828657057	0.5465469069005	-4.54662
IFT43	1.14473960337722	2.98906198937542e-16	2.04072097224601	0.0412805623990337	0.5465469069005	-4.54663
KAZN	1.14467384137424	-8.19857e-16	2.0406037386863	0.0412922232905828	0.5465469069005	-4.54663
PLA2G3	-1.14434	3.75767792950053e-16	-2.04002	0.0413507390707345	0.5465469069005	-4.54667
NAT1	1.14414579236337	4.2700885562506e-16	2.03966238862932	0.0413859579097193	0.5465469069005	-4.54669
SCARB1	-1.14386	-2.64745e-16	-2.03916	0.0414360801434621	0.5465469069005	-4.54672
BID	1.14308493474159	-1.87884e-16	2.03777120360266	0.0415748167914186	0.5465469069005	-4.54681
MLX	-1.14281	-1.02482e-16	-2.03728	0.0416240700580854	0.5465469069005	-4.54684
CCL20	-1.14272	5.97812397875084e-17	-2.03712	0.0416395718215441	0.5465469069005	-4.54685
ZNF808	1.14269286288589	-4.27009e-16	2.03707225926965	0.0416447997127792	0.5465469069005	-4.54686
CPNE8	1.14206858447165	5.97812397875084e-17	2.03595936158646	0.0417564361992008	0.5465469069005	-4.54693
DRC7	1.14127620600165	3.41607084500048e-17	2.03454679286174	0.0418984978963647	0.5465469069005	-4.54701
MT1X	1.14092752447988	-6.83214e-17	2.03392520023751	0.0419611408063439	0.5465469069005	-4.54705
KCTD12	1.14054795968225	-2.73286e-16	2.03324855216789	0.0420294221860136	0.5465469069005	-4.5471
DZANK1	1.14015321814147	3.07446376050043e-16	2.03254484860203	0.0421005334867814	0.5465469069005	-4.54714
UQCC2	1.13981278140873	-1.45183e-16	2.03193795391769	0.0421619437046618	0.5465469069005	-4.54718
PER2	1.13973341776214	-4.27009e-16	2.03179647278299	0.0421762707302269	0.5465469069005	-4.54719
MUC20	1.13922544117197	2.39124959150034e-16	2.03089090571961	0.0422680701777195	0.5465469069005	-4.54724
ADAMTSL3	1.13918033611633	-2.56205e-17	2.03081049718589	0.0422762295433932	0.5465469069005	-4.54725
SCGB2A1	1.13907937196819	-2.73286e-16	2.03063050895629	0.0422944984766004	0.5465469069005	-4.54726
ZDHHC20	1.13899022062683	7.42995408787605e-16	2.03047157935214	0.0423106354961564	0.5465469069005	-4.54727
FGFR1OP	1.13890801996045	3.58687438725051e-16	2.03032504067792	0.0423255190095581	0.5465469069005	-4.54728
ZNF121	1.13826027505362	6.57593637662593e-16	2.02917030940792	0.0424429567871229	0.5465469069005	-4.54735
EFHC1	1.13819457631068	1.53723188025022e-16	2.02905318862152	0.0424548835140406	0.5465469069005	-4.54736
MRAS	1.13807	-9.7358e-16	2.02883151227486	0.0424774651770885	0.5465469069005	-4.54737
SLFN12	1.13772419789393	5.80732043650082e-16	2.02821464761435	0.0425403572448367	0.5465469069005	-4.54741
DHRS9	1.1374431953477	-7.25915e-16	2.02771370592626	0.0425914883819879	0.5465469069005	-4.54744
PLIN5	-1.13719	-4.75047e-16	-2.02726	0.042638196275656	0.5465469069005	-4.54747
SEMA3A	1.13704179999406	5.97812397875084e-17	2.02699814064492	0.0426646162931468	0.5465469069005	-4.54749
C4ORF33	1.13695256786693	7.51535585900106e-16	2.02683906702444	0.04268088739792	0.5465469069005	-4.5475
USP27X	-1.13672	1.70803542250024e-16	-2.02642	0.0427238166801903	0.5465469069005	-4.54752
SERPINB3	1.13668711415262	-5.29491e-16	2.02636584415318	0.0427293227971705	0.5465469069005	-4.54753
TMC4	1.13659520191046	8.36937357025118e-16	2.02620199270642	0.0427461041804419	0.5465469069005	-4.54754
ZC2HC1A	1.1363881602183	-8.54018e-17	2.02583290062463	0.0427839263716307	0.5465469069005	-4.54756
PID1	-1.13585	6.31973106325089e-16	-2.02487	0.042883152018703	0.5465469069005	-4.54762
DDR1	1.13525236142245	-1.96424e-16	2.0238081183806	0.0429919167946944	0.5465469069005	-4.54768
SLC1A2	-1.13496	7.17374877450101e-16	-2.02328	0.0430460574726875	0.5465469069005	-4.54772
FANCE	-1.13495	-2.39125e-16	-2.02327	0.0430475299804545	0.5465469069005	-4.54772
DNAJC14	1.13481531987251	-3.45877e-16	2.02302900682189	0.0430721763664389	0.5465469069005	-4.54773
KCNJ8	-1.13479	-3.24527e-16	-2.02299	0.0430766172914827	0.5465469069005	-4.54774
HDAC7	1.13451158198874	9.09528862481378e-16	2.02248753497306	0.0431280302255018	0.5465469069005	-4.54777
SCN1A	-1.13429	2.73285667600039e-16	-2.02208	0.0431695962542114	0.5465469069005	-4.54779
SEH1L	-1.13428	6.14892752100087e-16	-2.02208	0.043170342802613	0.5465469069005	-4.54779
C6ORF118	1.13426116315993	-3.92848e-16	2.0220411147092	0.0431741253563182	0.5465469069005	-4.5478
ARAP3	1.13408943823716	-7.68616e-17	2.02173498163726	0.0432057591898719	0.5465469069005	-4.54781
MID1IP1	-1.13401	-2.90366e-16	-2.0216	0.0432200962601369	0.5465469069005	-4.54782
SLC9A3R1	1.13393978763232	-2.56205e-16	2.02146820033003	0.0432333426334506	0.5465469069005	-4.54783
ADAM12	1.13358508842774	-2.22045e-16	2.0208358800159	0.0432987798592342	0.5465469069005	-4.54787
LMCD1	1.1333644212081	2.04964250700029e-16	2.02044249778146	0.0433395322014269	0.5465469069005	-4.54789
NRDE2	1.13334378290072	-5.97812e-16	2.02040570598483	0.0433433452958054	0.5465469069005	-4.5479
LRRC46	1.1328049731538	-4.44089e-16	2.01944517282309	0.0434429951034736	0.5465469069005	-4.54796
WRNIP1	1.13269768931178	-2.04964e-16	2.0192539185101	0.0434628597300125	0.5465469069005	-4.54797
SPTSSA	-1.13267	2.39124959150034e-16	-2.0192	0.0434682176403636	0.5465469069005	-4.54797
ATXN3	1.13263179640476	1.53723188025022e-16	2.01913645158847	0.0434750642335608	0.5465469069005	-4.54798
AP3M2	1.13248055671834	-3.58687e-16	2.01886683743431	0.0435030873821816	0.5465469069005	-4.54799
ZNF324	1.13220487982506	9.30879305262631e-16	2.01837538975833	0.043554206713365	0.5465469069005	-4.54802
EFHD1	1.13208095551386	-7.00295e-16	2.01815447057278	0.0435772027781152	0.5465469069005	-4.54804
CASC4	1.13175703865191	3.15986553162545e-16	2.01757702577093	0.0436373589830421	0.5465469069005	-4.54807
TCTEX1D1	1.13171533082324	7.17374877450101e-16	2.01750267345498	0.0436451098450875	0.5465469069005	-4.54808
RGS10	1.13171086113486	4.18468678512559e-16	2.01749470536616	0.0436459405480058	0.5465469069005	-4.54808
TMEM19	1.13154995354831	-5.97812e-17	2.01720785629981	0.0436758545256691	0.5465469069005	-4.5481
TGFB3	1.13115361840759	2.39124959150034e-16	2.01650131183211	0.0437496101854237	0.5465469069005	-4.54814
TNFSF10	1.13111809291286	-3.58687e-16	2.01643798072876	0.0437562264065118	0.5465469069005	-4.54814
PLAG1	-1.13098	3.41607084500048e-16	-2.0162	0.0437813968077489	0.5465469069005	-4.54816
ENKD1	1.13013333204333	5.12410626750072e-17	2.01468245296229	0.0439399635902755	0.5465469069005	-4.54825
ZNF747	1.13004817354923	2.1350442781253e-16	2.01453064138491	0.043955883061946	0.5465469069005	-4.54826
SFTPB	-1.1299	-1.50307e-15	-2.01427	0.0439836497263537	0.5465469069005	-4.54828
DHDDS	1.12962957214837	-3.15987e-16	2.01378440297818	0.0440342069427832	0.5465469069005	-4.54831
RERG	1.12905833512411	-7.08835e-16	2.01276606188812	0.0441412803148639	0.5465469069005	-4.54837
RPH3AL	-1.12829	-2.39125e-16	-2.01139	0.0442865820517299	0.5465469069005	-4.54846
SH3GL2	-1.12756	-4.52629e-16	-2.01009	0.0444232915896089	0.5465469069005	-4.54854
DUSP12	-1.12741	5.97812397875084e-16	-2.00982	0.0444522904860873	0.5465469069005	-4.54855
DZIP1	1.1272998930968	2.04964250700029e-16	2.00963129699224	0.0444722653328001	0.5465469069005	-4.54857
SMAD9	1.1272786459884	-1.45183e-16	2.00959341988937	0.0444762773664855	0.5465469069005	-4.54857
CLSTN1	1.12719936686554	3.24526730275046e-16	2.00945208943465	0.0444912501234059	0.5465469069005	-4.54858
ITGB8	1.1270117163993	-6.83214e-16	2.00911756598427	0.0445267069789443	0.5465469069005	-4.5486
MSMO1	-1.12691	4.78249918300067e-16	-2.00894	0.0445454908118146	0.5465469069005	-4.54861
SYTL1	1.1267820770667	4.9533027252507e-16	2.0087081892136	0.0445701301347864	0.5465469069005	-4.54862
FCGR2A	1.12677534073017	-4.18469e-16	2.00869618038365	0.044571404467055	0.5465469069005	-4.54862
ANKMY1	1.12669537119792	3.92848147175055e-16	2.00855361913993	0.0445865348834521	0.5465469069005	-4.54863
PNMA1	1.12660787802602	-3.07446e-16	2.00839764554531	0.0446030937531744	0.5465469069005	-4.54864
KLHL42	1.12638006274767	-1.04617e-16	2.00799152050608	0.0446462341872128	0.5465469069005	-4.54867
NOXA1	1.12568042606693	6.83214169000096e-17	2.00674428205716	0.0447789415853049	0.5465469069005	-4.54874
E4F1	1.12552038439952	-2.98906e-16	2.00645897666006	0.0448093450750093	0.5465469069005	-4.54876
EIF2A	-1.12495	2.56205313375036e-17	-2.00544	0.0449178513344092	0.5465469069005	-4.54882
SLC15A2	1.12434348250938	7.17374877450101e-16	2.00436092015673	0.0450334590967155	0.5465469069005	-4.54889
USP44	-1.12376	1.04190160772515e-15	-2.00332	0.045144839999904	0.5465469069005	-4.54896
NCALD	1.12369479658523	-2.22045e-16	2.00320451134034	0.0451573900205958	0.5465469069005	-4.54896
WEE1	1.12359556495704	6.83214169000096e-17	2.0030276116645	0.0451763734771626	0.5465469069005	-4.54897
TMEM163	-1.1235	-2.73286e-16	-2.00287	0.0451937874827818	0.5465469069005	-4.54898
L3MBTL2	1.12332687177403	4.88925139690694e-16	2.00254861381028	0.045227809466922	0.5465469069005	-4.549
HOXD1	-1.12298	3.24526730275046e-16	-2.00194	0.0452937034490694	0.5465469069005	-4.54904
ZNF383	1.12277685902066	-6.34108e-16	2.00156810911078	0.0453332524927398	0.5465469069005	-4.54906
KCNK6	1.12234314876445	-4.27009e-16	2.00079493623103	0.0454165452012473	0.5465469069005	-4.54911
TLR4	-1.12216	5.12410626750072e-16	-2.00047	0.045451433023342	0.5465469069005	-4.54913
FXYD6	1.12178288514941	-4.8679e-16	1.99979615737702	0.045524332986563	0.5465469069005	-4.54917
SLAIN1	-1.12177	-3.24527e-16	-1.99978	0.0455264798656236	0.5465469069005	-4.54917
CDCA7L	-1.12169	4.2700885562506e-16	-1.99963	0.045542417499422	0.5465469069005	-4.54918
AMIGO1	-1.12141	-9.39419e-17	-1.99913	0.0455965164802914	0.5465469069005	-4.54921
TEK	1.12075711991421	-1.36643e-16	1.99796753135421	0.0457222362147528	0.5465469069005	-4.54929
DNAH7	1.12073701620018	-3.92848e-16	1.99793169257417	0.045726122101026	0.5465469069005	-4.54929
DPCD	1.12060689487419	2.56205313375036e-16	1.99769972600457	0.0457512802365277	0.5465469069005	-4.5493
THAP2	-1.1204	5.16680715306323e-16	-1.99733	0.0457910681964459	0.5465469069005	-4.54932
BBS5	1.12021316694177	5.12410626750072e-17	1.99699782939273	0.0458274760822367	0.5465469069005	-4.54935
USF3	1.1199113138669	3.75234031880522e-16	1.99645971758231	0.0458859642989342	0.5465469069005	-4.54938
SNTN	1.11969799503849	-8.02777e-16	1.99607943528438	0.0459273356881109	0.5465469069005	-4.5494
MIA2	-1.11917	-8.54018e-17	-1.99513	0.0460305457508276	0.5465469069005	-4.54946
PAM	1.11911919368661	1.4518301091252e-16	1.99504760930923	0.0460397476442987	0.5465469069005	-4.54947
NBEA	1.11902884965149	-2.04964e-16	1.9948865534965	0.046057314709789	0.5465469069005	-4.54947
TEX9	1.11894192296082	-7.85696e-16	1.99473158976487	0.0460742226138207	0.5465469069005	-4.54948
ACTR6	1.1187277092805	6.31973106325089e-16	1.99434971221937	0.0461159111224035	0.5465469069005	-4.54951
KLK10	1.11869	-2.22045e-16	1.99428203577187	0.0461233024843935	0.5465469069005	-4.54951
TUSC3	1.11838000183681	-5.46571e-16	1.99372985607876	0.0461836467177399	0.5465469069005	-4.54955
H2AFJ	1.1182186611393	-8.88178e-16	1.99344223490787	0.0462151053446114	0.5465469069005	-4.54956
LZTR1	1.1181163805627	4.61169564075065e-16	1.99325989988853	0.0462350576197678	0.5465469069005	-4.54957
TMC8	-1.11806	5.12410626750072e-16	-1.99317	0.0462454408044957	0.5465469069005	-4.54958
TRIM47	1.11789243931416	8.19857002800116e-16	1.99286068106087	0.0462787680480342	0.5465469069005	-4.5496
LURAP1	1.11754379061922	-4.18469e-16	1.99223914695685	0.0463468890026217	0.5465469069005	-4.54964
SEC14L3	1.11637960774352	6.83214169000096e-17	1.99016376457036	0.0465749655185938	0.5465469069005	-4.54976
ELFN2	1.11627584283497	1.70803542250024e-17	1.98997878344065	0.0465953400058069	0.5465469069005	-4.54978
UFL1	1.11622212842916	-5.72192e-16	1.98988302706589	0.0466058899039017	0.5465469069005	-4.54978
GLT8D1	1.11622156507699	7.34455231675104e-16	1.9898820227811	0.046606000560997	0.5465469069005	-4.54978
CLPB	-1.11598	-1.75074e-16	-1.98946	0.0466527188153773	0.5465469069005	-4.54981
EIF3M	-1.11576	-1.54043e-15	-1.98906	0.0466966508934298	0.5465469069005	-4.54983
MMAB	-1.11562	-2.90366e-16	-1.9888	0.0467249191938162	0.5465469069005	-4.54985
ANKRD36C	1.11507899453901	9.39419482375132e-17	1.98784516858977	0.0468308867833639	0.5465469069005	-4.54991
SLC12A4	-1.115	-9.22339e-16	-1.98771	0.0468456261263681	0.5465469069005	-4.54991
MACROD2	-1.11488	6.83214169000096e-17	-1.98749	0.0468701237635896	0.5465469069005	-4.54993
RCCD1	-1.11438	2.43395047706284e-16	-1.98659	0.0469696179599015	0.5465469069005	-4.54998
IGFBP2	1.11431074054467	-5.29491e-16	1.98647560643463	0.0469826110407341	0.5465469069005	-4.54999
HIST1H1E	-1.11428	-1.28103e-16	-1.98642	0.0469892801998829	0.5465469069005	-4.54999
XPO7	1.11419736666699	-5.63652e-16	1.98627349544869	0.0470050364890639	0.5465469069005	-4.55
ELOVL6	-1.1141	-6.66134e-16	-1.9861	0.0470247581153713	0.5465469069005	-4.55001
IGHM	1.11394620061087	8.19857002800116e-16	1.98582574310682	0.0470547494199392	0.5465469069005	-4.55003
MTERF3	1.11373969178681	-3.07446e-16	1.98545760096605	0.0470956565352513	0.5465469069005	-4.55005
VAV2	1.11344827635066	-9.39419e-16	1.98493809627656	0.0471534336010066	0.5465469069005	-4.55008
KIF18A	-1.11344	-3.92848e-16	-1.98492	0.0471559842453434	0.5465469069005	-4.55009
PRR5	1.11343497334165	-4.44089e-16	1.98491438107583	0.0471560725254189	0.5465469069005	-4.55009
AGBL2	1.11309872104743	-1.07606e-15	1.98431494596696	0.0472228163216486	0.5465469069005	-4.55012
RECK	1.1129351083482	-4.7825e-16	1.98402327451115	0.0472553210557222	0.5465469069005	-4.55014
HAS3	-1.1128	7.7715611723761e-16	-1.98378	0.0472824150137009	0.5465469069005	-4.55016
SERPINB11	1.11275248922863	7.51535585900106e-16	1.98369772041472	0.0472916239927906	0.5465469069005	-4.55016
PLCG2	1.11253725667783	2.56205313375036e-16	1.98331402653443	0.0473344402771161	0.5465469069005	-4.55018
ALG14	1.11219732413482	4.2700885562506e-16	1.98270803066635	0.047402129571564	0.5465469069005	-4.55022
PLCB2	-1.11216	9.9066054505014e-16	-1.98264	0.0474099824635441	0.5465469069005	-4.55023
PIP5KL1	-1.11119	-2.75421e-16	-1.98092	0.0476025893000226	0.5465469069005	-4.55033
INPP5D	1.11118342821329	8.36937357025118e-16	1.98090056400351	0.047604505886839	0.5465469069005	-4.55033
DBN1	1.11088847937297	1.53723188025022e-16	1.98037476033392	0.0476635146663594	0.5465469069005	-4.55036
ANKRD66	1.11064208069799	0	1.9799355067761	0.047712857411177	0.5465469069005	-4.55039
SLC2A12	-1.1106	-2.04964e-16	-1.97985	0.0477220319833825	0.5465469069005	-4.5504
EFCAB12	1.11053713250721	-6.49053e-16	1.97974841621568	0.0477338869222547	0.5465469069005	-4.5504
HRAS	1.1105105716704	-1.14438e-15	1.9797010663585	0.047739210416099	0.5465469069005	-4.5504
C16ORF70	1.11049205511021	-4.27009e-16	1.97966805698886	0.047742921919462	0.5465469069005	-4.55041
FAM13C	1.11015122741503	-1.70804e-16	1.97906046533796	0.0478112815645815	0.5465469069005	-4.55044
NMNAT1	1.10992262375621	4.35549032737561e-16	1.97865293485722	0.047857178568418	0.5465469069005	-4.55047
PELP1	1.1097077233947	4.9533027252507e-16	1.97826983316896	0.0479003581072279	0.5465469069005	-4.55049
PACRG	1.10959056798078	1.05898196195015e-15	1.97806098085923	0.0479239117183156	0.5465469069005	-4.5505
FAM229B	1.1084660664178	-9.22339e-16	1.9760563381299	0.0481504835608288	0.5465469069005	-4.55063
VANGL2	1.10844040984512	8.02776648575113e-16	1.9760106002994	0.0481556634958223	0.5465469069005	-4.55063
MTMR10	1.1081020345245	-2.92501e-16	1.97540738048307	0.0482240236132816	0.5465469069005	-4.55067
THBS3	1.10803600787441	-1.96424e-16	1.97528967513842	0.0482373721180573	0.5465469069005	-4.55067
PTPRU	1.1078295612543	1.53723188025022e-16	1.97492164388828	0.0482791291360188	0.5465469069005	-4.5507
LRP12	1.10777444424752	4.2700885562506e-17	1.97482338710452	0.0482902825362442	0.5465469069005	-4.5507
SNRNP70	1.10741980406014	8.02776648575113e-16	1.97419117200001	0.0483620988068545	0.5465469069005	-4.55074
FAM166B	1.10739965464346	-1.70804e-16	1.97415525174611	0.0483661818483755	0.5465469069005	-4.55074
TBC1D1	1.10734604459876	-4.35549e-16	1.97405968141534	0.0483770467013606	0.5465469069005	-4.55075
SC5D	-1.10717	-3.41607e-16	-1.97375	0.0484119681801696	0.5465469069005	-4.55077
CCDC78	1.10708399533892	2.73285667600039e-16	1.97359252764628	0.0484301842890522	0.5465469069005	-4.55078
CNTNAP1	-1.10685	1.70803542250024e-16	-1.97318	0.0484772659710959	0.5465469069005	-4.5508
POMZP3	-1.10616	2.04964250700029e-16	-1.97195	0.0486178402110776	0.5465469069005	-4.55088
DCXR	-1.10603	-1.20416e-15	-1.97171	0.0486450428228431	0.5465469069005	-4.55089
PEX11B	1.10601284182578	2.1350442781253e-16	1.97168298819093	0.0486478996845201	0.5465469069005	-4.55089
GGT6	1.10528022835087	1.53723188025022e-16	1.97037696219306	0.0487972785063826	0.5465469069005	-4.55097
TTN	-1.10489	-4.9533e-16	-1.96968	0.0488768237599209	0.5465469069005	-4.55101
OMG	1.10483883926057	-9.22339e-16	1.96959010029814	0.048887462854782	0.5465469069005	-4.55102
FAM149B1	1.10465937303275	6.66133814775094e-16	1.96927016684442	0.0489241712728235	0.5465469069005	-4.55104
BTN3A3	1.10438875031429	5.12410626750072e-17	1.96878772921799	0.0489795687886277	0.5465469069005	-4.55107
AGPAT1	1.10434377751418	1.53723188025022e-16	1.96870755645548	0.0489887799944566	0.5465469069005	-4.55107
RAP1GAP2	1.10416621085673	-1.19562e-16	1.96839100935537	0.0490251629161327	0.5465469069005	-4.55109
CFAP52	1.10336279754358	1.02482125350014e-16	1.96695876887667	0.0491900636698183	0.5465469069005	-4.55118
ABHD3	-1.10304	2.26314693481282e-16	-1.96639	0.0492556939997934	0.5465469069005	-4.55121
ERBB2	1.10266695368037	-8.54018e-17	1.96571829186262	0.0493332616737803	0.5465469069005	-4.55125
ZNF528	1.10238011886766	1.70803542250024e-17	1.96520695302525	0.049392391250853	0.5465469069005	-4.55128
RUVBL2	1.10226035410333	-1.19562e-16	1.96499344904097	0.0494170977544645	0.5465469069005	-4.5513
GSN	1.10215816088011	1.19562479575017e-16	1.96481126974601	0.0494381875881235	0.5465469069005	-4.55131
TNFRSF10C	1.10172074619072	5.50841423756328e-16	1.96403149299367	0.0495285431377547	0.5465469069005	-4.55136
DTX4	1.10155137754248	-3.07446e-16	1.96372956043933	0.0495635663368436	0.5465469069005	-4.55137
SOX9	1.10135448863502	-1.70804e-16	1.96337856767077	0.0496043064709153	0.5465469069005	-4.5514
IPO4	1.10135124977567	-6.40513e-17	1.96337279377409	0.0496049768884972	0.5465469069005	-4.5514
ROBO1	1.10127290379797	-7.85696e-16	1.9632331268321	0.0496211961851467	0.5465469069005	-4.5514
NFIA	1.1012262520268	5.12410626750072e-17	1.96314996097714	0.0496308562144365	0.5465469069005	-4.55141
TOM1L2	1.10107265755048	-3.92848e-16	1.96287614895201	0.0496626716649678	0.5465469069005	-4.55143
ZBTB7C	1.10103432057951	-5.97812e-16	1.96280780584546	0.0496706154249019	0.5465469069005	-4.55143
[truncated: 10,879 more rows]

## Sheet: Table S15(FI_DEG)
Table S15: The Differential Genes of Fibrotic Cells in the Training Set
[truncated: 33 more rows]

[truncated: 1 more sheets: Table S15(NE_DEG)]
