# Supplementary material
Source: Research Square preprint supplement (doi:10.21203/rs.3.rs-9392286/v1)
Supplement: Supplementary file 19 [file e76a90a249b7a8e7d087fe15.xlsx]

## Sheet: TableS20(top_gene_celltype)
Table S20: The top 30 genes of each of the three cell types(Testing set)
celltype	Feature	Test_AUC	Direction	Wilcox_p	FDR_BH	NonmissRate	gene
B_cell	B_cell__RERE	1	1	0.2	0.567216062331435	1	RERE
B_cell	B_cell__SPEN	1	1	0.2	0.567216062331435	1	SPEN
B_cell	B_cell__EIF4G3	1	1	0.2	0.567216062331435	1	EIF4G3
B_cell	B_cell__SYTL1	1	1	0.2	0.567216062331435	1	SYTL1
B_cell	B_cell__SRSF4	1	1	0.2	0.567216062331435	1	SRSF4
B_cell	B_cell__FAF1	1	1	0.2	0.567216062331435	1	FAF1
B_cell	B_cell__ZRANB2	1	1	0.2	0.567216062331435	1	ZRANB2
B_cell	B_cell__CTSS	1	1	0.2	0.567216062331435	1	CTSS
B_cell	B_cell__GATAD2B	1	1	0.2	0.567216062331435	1	GATAD2B
B_cell	B_cell__FCRL5	1	1	0.2	0.567216062331435	1	FCRL5
B_cell	B_cell__DCAF8	1	1	0.2	0.567216062331435	1	DCAF8
B_cell	B_cell__RABGAP1L	1	1	0.2	0.567216062331435	1	RABGAP1L
B_cell	B_cell__PUM2	1	1	0.2	0.567216062331435	1	PUM2
B_cell	B_cell__RAB10	1	1	0.2	0.567216062331435	1	RAB10
B_cell	B_cell__ACYP2	1	1	0.2	0.567216062331435	1	ACYP2
B_cell	B_cell__CCDC88A	1	1	0.2	0.567216062331435	1	CCDC88A
B_cell	B_cell__RNF149	1	1	0.2	0.567216062331435	1	RNF149
B_cell	B_cell__BCL2L11	1	1	0.2	0.567216062331435	1	BCL2L11
B_cell	B_cell__CXCR4	1	1	0.2	0.567216062331435	1	CXCR4
B_cell	B_cell__CYTIP	1	1	0.2	0.567216062331435	1	CYTIP
B_cell	B_cell__SP3	1	1	0.2	0.567216062331435	1	SP3
B_cell	B_cell__LRRFIP1	1	1	0.2	0.567216062331435	1	LRRFIP1
B_cell	B_cell__PBRM1	1	1	0.2	0.567216062331435	1	PBRM1
B_cell	B_cell__CD47	1	1	0.2	0.567216062331435	1	CD47
B_cell	B_cell__EAF2	1	1	0.2	0.567216062331435	1	EAF2
B_cell	B_cell__ZBTB38	1	1	0.2	0.567216062331435	1	ZBTB38
B_cell	B_cell__SEC62	1	1	0.2	0.567216062331435	1	SEC62
B_cell	B_cell__LPP	1	1	0.2	0.567216062331435	1	LPP
B_cell	B_cell__RUBCN	1	1	0.2	0.567216062331435	1	RUBCN
B_cell	B_cell__ADD1	1	1	0.2	0.567216062331435	1	ADD1
Endothelial_cells	Endothelial_cells__TNFRSF4	1	1	0.2	0.567216062331435	1	TNFRSF4
Endothelial_cells	Endothelial_cells__CCNL2	1	1	0.2	0.567216062331435	1	CCNL2
Endothelial_cells	Endothelial_cells__ATAD3B	1	1	0.2	0.567216062331435	1	ATAD3B
Endothelial_cells	Endothelial_cells__FAAP20	1	1	0.2	0.567216062331435	1	FAAP20
Endothelial_cells	Endothelial_cells__SKI	1	1	0.2	0.567216062331435	1	SKI
Endothelial_cells	Endothelial_cells__PANK4	1	1	0.2	0.567216062331435	1	PANK4
Endothelial_cells	Endothelial_cells__TPRG1L	1	1	0.2	0.567216062331435	1	TPRG1L
Endothelial_cells	Endothelial_cells__WRAP73	1	1	0.2	0.567216062331435	1	WRAP73
Endothelial_cells	Endothelial_cells__LRRC47	1	1	0.2	0.567216062331435	1	LRRC47
Endothelial_cells	Endothelial_cells__ACOT7	1	1	0.2	0.567216062331435	1	ACOT7
Endothelial_cells	Endothelial_cells__PLEKHG5	1	1	0.2	0.567216062331435	1	PLEKHG5
Endothelial_cells	Endothelial_cells__ZBTB48	1	1	0.2	0.567216062331435	1	ZBTB48
Endothelial_cells	Endothelial_cells__KLHL21	1	1	0.2	0.567216062331435	1	KLHL21
Endothelial_cells	Endothelial_cells__VAMP3	1	1	0.2	0.567216062331435	1	VAMP3
Endothelial_cells	Endothelial_cells__ENO1	1	1	0.2	0.567216062331435	1	ENO1
Endothelial_cells	Endothelial_cells__RBP7	1	1	0.2	0.567216062331435	1	RBP7
Endothelial_cells	Endothelial_cells__CASZ1	1	1	0.2	0.567216062331435	1	CASZ1
Endothelial_cells	Endothelial_cells__EXOSC10	1	1	0.2	0.567216062331435	1	EXOSC10
Endothelial_cells	Endothelial_cells__MTOR	1	1	0.2	0.567216062331435	1	MTOR
Endothelial_cells	Endothelial_cells__UBIAD1	1	1	0.2	0.567216062331435	1	UBIAD1
Endothelial_cells	Endothelial_cells__FBXO6	1	1	0.2	0.567216062331435	1	FBXO6
Endothelial_cells	Endothelial_cells__AGTRAP	1	1	0.2	0.567216062331435	1	AGTRAP
Endothelial_cells	Endothelial_cells__MTHFR	1	1	0.2	0.567216062331435	1	MTHFR
Endothelial_cells	Endothelial_cells__CLCN6	1	1	0.2	0.567216062331435	1	CLCN6
Endothelial_cells	Endothelial_cells__DHRS3	1	1	0.2	0.567216062331435	1	DHRS3
Endothelial_cells	Endothelial_cells__TMEM51	1	1	0.2	0.567216062331435	1	TMEM51
Endothelial_cells	Endothelial_cells__EFHD2	1	1	0.2	0.567216062331435	1	EFHD2
Endothelial_cells	Endothelial_cells__DNAJC16	1	1	0.2	0.567216062331435	1	DNAJC16
Endothelial_cells	Endothelial_cells__ZBTB17	1	1	0.2	0.567216062331435	1	ZBTB17
Endothelial_cells	Endothelial_cells__RCC2	1	1	0.2	0.567216062331435	1	RCC2
Epithelial_cells	Epithelial_cells__HES4	1	1	0.2	0.567216062331435	1	HES4
Epithelial_cells	Epithelial_cells__ISG15	1	1	0.2	0.567216062331435	1	ISG15
Epithelial_cells	Epithelial_cells__AGRN	1	1	0.2	0.567216062331435	1	AGRN
Epithelial_cells	Epithelial_cells__TTLL10	1	1	0.2	0.567216062331435	1	TTLL10
Epithelial_cells	Epithelial_cells__SDF4	1	1	0.2	0.567216062331435	1	SDF4
Epithelial_cells	Epithelial_cells__CCNL2	1	1	0.2	0.567216062331435	1	CCNL2
Epithelial_cells	Epithelial_cells__ATAD3C	1	1	0.2	0.567216062331435	1	ATAD3C
Epithelial_cells	Epithelial_cells__SSU72	1	1	0.2	0.567216062331435	1	SSU72
Epithelial_cells	Epithelial_cells__MMP23B	1	1	0.2	0.567216062331435	1	MMP23B
Epithelial_cells	Epithelial_cells__SLC35E2B	1	1	0.2	0.567216062331435	1	SLC35E2B
Epithelial_cells	Epithelial_cells__NADK	1	1	0.2	0.567216062331435	1	NADK
Epithelial_cells	Epithelial_cells__PRKCZ	1	1	0.2	0.567216062331435	1	PRKCZ
Epithelial_cells	Epithelial_cells__SKI	1	1	0.2	0.567216062331435	1	SKI
Epithelial_cells	Epithelial_cells__PLCH2	1	1	0.2	0.567216062331435	1	PLCH2
Epithelial_cells	Epithelial_cells__TNFRSF14	1	1	0.2	0.567216062331435	1	TNFRSF14
Epithelial_cells	Epithelial_cells__MEGF6	1	1	0.2	0.567216062331435	1	MEGF6
Epithelial_cells	Epithelial_cells__TPRG1L	1	1	0.2	0.567216062331435	1	TPRG1L
Epithelial_cells	Epithelial_cells__SMIM1	1	1	0.2	0.567216062331435	1	SMIM1
Epithelial_cells	Epithelial_cells__RNF207	1	1	0.2	0.567216062331435	1	RNF207
Epithelial_cells	Epithelial_cells__ESPN	1	1	0.2	0.567216062331435	1	ESPN
Epithelial_cells	Epithelial_cells__KLHL21	1	1	0.2	0.567216062331435	1	KLHL21
Epithelial_cells	Epithelial_cells__VAMP3	1	1	0.2	0.567216062331435	1	VAMP3
Epithelial_cells	Epithelial_cells__H6PD	1	1	0.2	0.567216062331435	1	H6PD
Epithelial_cells	Epithelial_cells__SLC25A33	1	1	0.2	0.567216062331435	1	SLC25A33
Epithelial_cells	Epithelial_cells__CLSTN1	1	1	0.2	0.567216062331435	1	CLSTN1
Epithelial_cells	Epithelial_cells__CTNNBIP1	1	1	0.2	0.567216062331435	1	CTNNBIP1
Epithelial_cells	Epithelial_cells__LZIC	1	1	0.2	0.567216062331435	1	LZIC
Epithelial_cells	Epithelial_cells__UBE4B	1	1	0.2	0.567216062331435	1	UBE4B
Epithelial_cells	Epithelial_cells__KIF1B	1	1	0.2	0.567216062331435	1	KIF1B
Epithelial_cells	Epithelial_cells__PEX14	1	1	0.2	0.567216062331435	1	PEX14

## Sheet: Table S20(GO_TOP30_EP)
Table S20: Go Enrichment Analysis (BP) of the Top30 Genes in Epithelial Cells of the Testing set (pvalueCutoff = 1, qvalueCutoff = 1)
ID	Description	GeneRatio	BgRatio	RichFactor	FoldEnrichment	zScore	pvalue	p.adjust	qvalue	geneID	Count
GO:0072384	organelle transport along microtubule	3/27	93/18986	0.0322581	22.6834	7.91039	0.000305606	0.156012	0.124097	PRKCZ/KIF1B/PEX14	3
GO:0006904	vesicle docking involved in exocytosis	2/27	39/18986	0.0512821	36.0608	8.2711	0.00139706	0.156012	0.124097	TPRG1L/VAMP3	2
GO:0032733	positive regulation of interleukin-10 production	2/27	42/18986	0.047619	33.485	7.95337	0.00161905	0.156012	0.124097	ISG15/PRKCZ	2
GO:0006739	NADP metabolic process	2/27	46/18986	0.0434783	30.5733	7.57823	0.00193943	0.156012	0.124097	NADK/H6PD	2
GO:0010970	transport along microtubule	3/27	180/18986	0.0166667	11.7198	5.45321	0.00207329	0.156012	0.124097	PRKCZ/KIF1B/PEX14	3
GO:0047496	vesicle transport along microtubule	2/27	50/18986	0.04	28.1274	7.24817	0.00228744	0.156012	0.124097	PRKCZ/KIF1B	2
GO:1903539	protein localization to postsynaptic membrane	2/27	52/18986	0.0384615	27.0456	7.09731	0.00247171	0.156012	0.124097	PRKCZ/CLSTN1	2
GO:0062237	protein localization to postsynapse	2/27	55/18986	0.0363636	25.5704	6.8863	0.00276083	0.156012	0.124097	PRKCZ/CLSTN1	2
GO:0003002	regionalization	4/27	430/18986	0.00930233	6.54126	4.38611	0.00301299	0.156012	0.124097	HES4/SKI/RNF207/CTNNBIP1	4
GO:0030705	cytoskeleton-dependent intracellular transport	3/27	208/18986	0.0144231	10.1421	5.00302	0.0031227	0.156012	0.124097	PRKCZ/KIF1B/PEX14	3
GO:0031503	protein-containing complex localization	3/27	214/18986	0.0140187	9.85774	4.91761	0.00338298	0.156012	0.124097	PRKCZ/KLHL21/CLSTN1	3
GO:0048278	vesicle docking	2/27	61/18986	0.0327869	23.0553	6.51086	0.00338443	0.156012	0.124097	TPRG1L/VAMP3	2
GO:0051098	regulation of binding	3/27	219/18986	0.0136986	9.63267	4.84897	0.00360978	0.156012	0.124097	SKI/CTNNBIP1/PEX14	3
GO:0009952	anterior/posterior pattern specification	3/27	220/18986	0.0136364	9.58889	4.83551	0.00365623	0.156012	0.124097	HES4/SKI/CTNNBIP1	3
GO:0032091	negative regulation of protein binding	2/27	64/18986	0.03125	21.9745	6.34276	0.00371865	0.156012	0.124097	CTNNBIP1/PEX14	2
GO:0051965	positive regulation of synapse assembly	2/27	65/18986	0.0307692	21.6365	6.28926	0.00383335	0.156012	0.124097	AGRN/CLSTN1	2
GO:0099518	vesicle cytoskeletal trafficking	2/27	65/18986	0.0307692	21.6365	6.28926	0.00383335	0.156012	0.124097	PRKCZ/KIF1B	2
GO:0099111	microtubule-based transport	3/27	225/18986	0.0133333	9.3758	4.76946	0.003894	0.156012	0.124097	PRKCZ/KIF1B/PEX14	3
GO:0017156	calcium-ion regulated exocytosis	2/27	66/18986	0.030303	21.3086	6.23694	0.00394968	0.156012	0.124097	SDF4/VAMP3	2
GO:0032613	interleukin-10 production	2/27	66/18986	0.030303	21.3086	6.23694	0.00394968	0.156012	0.124097	ISG15/PRKCZ	2
GO:0032653	regulation of interleukin-10 production	2/27	66/18986	0.030303	21.3086	6.23694	0.00394968	0.156012	0.124097	ISG15/PRKCZ	2
GO:0045055	regulated exocytosis	3/27	229/18986	0.0131004	9.21203	4.71809	0.00409089	0.156012	0.124097	SDF4/TPRG1L/VAMP3	3
GO:0007389	pattern specification process	4/27	476/18986	0.00840336	5.90912	4.09339	0.00433276	0.158052	0.125719	HES4/SKI/RNF207/CTNNBIP1	4
GO:0097120	receptor localization to synapse	2/27	76/18986	0.0263158	18.5049	5.77031	0.00520216	0.181859	0.144657	PRKCZ/CLSTN1	2
GO:0140056	organelle localization by membrane tethering	2/27	80/18986	0.025	17.5796	5.60789	0.00574789	0.190827	0.15179	TPRG1L/VAMP3	2
GO:0002720	positive regulation of cytokine production involved in immune response	2/27	85/18986	0.0235294	16.5455	5.42066	0.00646537	0.190827	0.15179	PRKCZ/TNFRSF14	2
GO:0035418	protein localization to synapse	2/27	89/18986	0.0224719	15.8019	5.28197	0.00706727	0.190827	0.15179	PRKCZ/CLSTN1	2
GO:0022406	membrane docking	2/27	90/18986	0.0222222	15.6263	5.2487	0.00722158	0.190827	0.15179	TPRG1L/VAMP3	2
GO:0140029	exocytic process	2/27	92/18986	0.0217391	15.2866	5.18372	0.00753479	0.190827	0.15179	TPRG1L/VAMP3	2
GO:0051100	negative regulation of binding	2/27	101/18986	0.019802	13.9245	4.91467	0.0090189	0.190827	0.15179	CTNNBIP1/PEX14	2
GO:0045639	positive regulation of myeloid cell differentiation	2/27	107/18986	0.0186916	13.1436	4.75369	0.0100751	0.190827	0.15179	ISG15/CTNNBIP1	2
GO:1901890	positive regulation of cell junction assembly	2/27	110/18986	0.0181818	12.7852	4.67797	0.0106229	0.190827	0.15179	AGRN/CLSTN1	2
GO:0060562	epithelial tube morphogenesis	3/27	331/18986	0.00906344	6.37328	3.72165	0.0112673	0.190827	0.15179	SKI/RNF207/CTNNBIP1	3
GO:0043393	regulation of protein binding	2/27	116/18986	0.0172414	12.1239	4.53502	0.0117574	0.190827	0.15179	CTNNBIP1/PEX14	2
GO:0099072	regulation of postsynaptic membrane neurotransmitter receptor levels	2/27	117/18986	0.017094	12.0203	4.51221	0.0119514	0.190827	0.15179	PRKCZ/CLSTN1	2
GO:1902414	protein localization to cell junction	2/27	120/18986	0.0166667	11.7198	4.44544	0.0125421	0.190827	0.15179	PRKCZ/CLSTN1	2
GO:0046634	regulation of alpha-beta T cell activation	2/27	122/18986	0.0163934	11.5276	4.40223	0.0129429	0.190827	0.15179	PRKCZ/TNFRSF14	2
GO:0002718	regulation of cytokine production involved in immune response	2/27	126/18986	0.015873	11.1617	4.31876	0.0137611	0.190827	0.15179	PRKCZ/TNFRSF14	2
GO:0002367	cytokine production involved in immune response	2/27	127/18986	0.015748	11.0738	4.29848	0.0139691	0.190827	0.15179	PRKCZ/TNFRSF14	2
GO:0006887	exocytosis	3/27	360/18986	0.00833333	5.85988	3.51315	0.0141162	0.190827	0.15179	SDF4/TPRG1L/VAMP3	3
GO:0034651	cortisol biosynthetic process	1/27	10/18986	0.1	70.3185	8.27421	0.0141337	0.190827	0.15179	H6PD	1
GO:0045657	positive regulation of monocyte differentiation	1/27	10/18986	0.1	70.3185	8.27421	0.0141337	0.190827	0.15179	CTNNBIP1	1
GO:0140507	granzyme-mediated programmed cell death signaling pathway	1/27	10/18986	0.1	70.3185	8.27421	0.0141337	0.190827	0.15179	UBE4B	1
GO:0180012	co-transcriptional RNA 3'-end processing, cleavage and polyadenylation pathway	1/27	10/18986	0.1	70.3185	8.27421	0.0141337	0.190827	0.15179	SSU72	1
GO:1902645	tertiary alcohol biosynthetic process	1/27	10/18986	0.1	70.3185	8.27421	0.0141337	0.190827	0.15179	H6PD	1
GO:1990778	protein localization to cell periphery	3/27	362/18986	0.00828729	5.8275	3.49961	0.0143264	0.190827	0.15179	PRKCZ/VAMP3/CLSTN1	3
GO:0051090	regulation of DNA-binding transcription factor activity	3/27	363/18986	0.00826446	5.81145	3.49288	0.0144323	0.190827	0.15179	PRKCZ/CTNNBIP1/PEX14	3
GO:0010624	regulation of Schwann cell proliferation	1/27	11/18986	0.0909091	63.9259	7.87797	0.0155364	0.190827	0.15179	SKI	1
GO:0014010	Schwann cell proliferation	1/27	11/18986	0.0909091	63.9259	7.87797	0.0155364	0.190827	0.15179	SKI	1
GO:0031943	regulation of glucocorticoid metabolic process	1/27	11/18986	0.0909091	63.9259	7.87797	0.0155364	0.190827	0.15179	H6PD	1
GO:0032754	positive regulation of interleukin-5 production	1/27	11/18986	0.0909091	63.9259	7.87797	0.0155364	0.190827	0.15179	PRKCZ	1
GO:0098903	regulation of membrane repolarization during action potential	1/27	11/18986	0.0909091	63.9259	7.87797	0.0155364	0.190827	0.15179	RNF207	1
GO:1904396	regulation of neuromuscular junction development	1/27	11/18986	0.0909091	63.9259	7.87797	0.0155364	0.190827	0.15179	AGRN	1
GO:0002702	positive regulation of production of molecular mediator of immune response	2/27	140/18986	0.0142857	10.0455	4.05384	0.0167968	0.190827	0.15179	PRKCZ/TNFRSF14	2
GO:0009650	UV protection	1/27	12/18986	0.0833333	58.5988	7.53189	0.0169372	0.190827	0.15179	SDF4	1
GO:0034650	cortisol metabolic process	1/27	12/18986	0.0833333	58.5988	7.53189	0.0169372	0.190827	0.15179	H6PD	1
GO:0045161	neuronal ion channel clustering	1/27	12/18986	0.0833333	58.5988	7.53189	0.0169372	0.190827	0.15179	AGRN	1
GO:0045628	regulation of T-helper 2 cell differentiation	1/27	12/18986	0.0833333	58.5988	7.53189	0.0169372	0.190827	0.15179	PRKCZ	1
GO:0070528	protein kinase C signaling	1/27	12/18986	0.0833333	58.5988	7.53189	0.0169372	0.190827	0.15179	PRKCZ	1
GO:0099519	dense core granule cytoskeletal transport	1/27	12/18986	0.0833333	58.5988	7.53189	0.0169372	0.190827	0.15179	KIF1B	1
GO:1901950	dense core granule transport	1/27	12/18986	0.0833333	58.5988	7.53189	0.0169372	0.190827	0.15179	KIF1B	1
GO:0016482	cytosolic transport	2/27	142/18986	0.0140845	9.90402	4.01905	0.0172518	0.190827	0.15179	VAMP3/KIF1B	2
GO:0016081	synaptic vesicle docking	1/27	13/18986	0.0769231	54.0912	7.22612	0.0183361	0.190827	0.15179	TPRG1L	1
GO:0017062	respiratory chain complex III assembly	1/27	13/18986	0.0769231	54.0912	7.22612	0.0183361	0.190827	0.15179	SLC25A33	1
GO:0034551	mitochondrial respiratory chain complex III assembly	1/27	13/18986	0.0769231	54.0912	7.22612	0.0183361	0.190827	0.15179	SLC25A33	1
GO:0035745	T-helper 2 cell cytokine production	1/27	13/18986	0.0769231	54.0912	7.22612	0.0183361	0.190827	0.15179	PRKCZ	1
GO:0051124	synaptic assembly at neuromuscular junction	1/27	13/18986	0.0769231	54.0912	7.22612	0.0183361	0.190827	0.15179	AGRN	1
GO:0060081	membrane hyperpolarization	1/27	13/18986	0.0769231	54.0912	7.22612	0.0183361	0.190827	0.15179	PRKCZ	1
GO:2000551	regulation of T-helper 2 cell cytokine production	1/27	13/18986	0.0769231	54.0912	7.22612	0.0183361	0.190827	0.15179	PRKCZ	1
GO:0031333	negative regulation of protein-containing complex assembly	2/27	152/18986	0.0131579	9.25244	3.85489	0.0196053	0.190827	0.15179	PRKCZ/CTNNBIP1	2
GO:0001921	positive regulation of receptor recycling	1/27	14/18986	0.0714286	50.2275	6.95336	0.0197331	0.190827	0.15179	VAMP3	1
GO:0032736	positive regulation of interleukin-13 production	1/27	14/18986	0.0714286	50.2275	6.95336	0.0197331	0.190827	0.15179	PRKCZ	1
GO:0034309	primary alcohol biosynthetic process	1/27	14/18986	0.0714286	50.2275	6.95336	0.0197331	0.190827	0.15179	H6PD	1
GO:0045667	regulation of osteoblast differentiation	2/27	156/18986	0.0128205	9.01519	3.79342	0.0205826	0.190827	0.15179	SKI/CTNNBIP1	2
GO:0009411	response to UV	2/27	157/18986	0.0127389	8.95777	3.77839	0.0208301	0.190827	0.15179	SDF4/UBE4B	2
GO:0098876	vesicle-mediated transport to the plasma membrane	2/27	157/18986	0.0127389	8.95777	3.77839	0.0208301	0.190827	0.15179	VAMP3/CLSTN1	2
GO:0043433	negative regulation of DNA-binding transcription factor activity	2/27	158/18986	0.0126582	8.90108	3.7635	0.0210789	0.190827	0.15179	CTNNBIP1/PEX14	2
GO:0006369	termination of RNA polymerase II transcription	1/27	15/18986	0.0666667	46.879	6.70802	0.0211282	0.190827	0.15179	SSU72	1
GO:0016558	protein import into peroxisome matrix	1/27	15/18986	0.0666667	46.879	6.70802	0.0211282	0.190827	0.15179	PEX14	1
GO:0090030	regulation of steroid hormone biosynthetic process	1/27	15/18986	0.0666667	46.879	6.70802	0.0211282	0.190827	0.15179	H6PD	1
GO:0098969	neurotransmitter receptor transport to postsynaptic membrane	1/27	15/18986	0.0666667	46.879	6.70802	0.0211282	0.190827	0.15179	CLSTN1	1
GO:0006704	glucocorticoid biosynthetic process	1/27	16/18986	0.0625	43.9491	6.48574	0.0225213	0.190827	0.15179	H6PD	1
GO:0030033	microvillus assembly	1/27	16/18986	0.0625	43.9491	6.48574	0.0225213	0.190827	0.15179	ESPN	1
GO:0043584	nose development	1/27	16/18986	0.0625	43.9491	6.48574	0.0225213	0.190827	0.15179	SKI	1
GO:0046642	negative regulation of alpha-beta T cell proliferation	1/27	16/18986	0.0625	43.9491	6.48574	0.0225213	0.190827	0.15179	TNFRSF14	1
GO:0072531	pyrimidine-containing compound transmembrane transport	1/27	16/18986	0.0625	43.9491	6.48574	0.0225213	0.190827	0.15179	SLC25A33	1
GO:0098877	neurotransmitter receptor transport to plasma membrane	1/27	16/18986	0.0625	43.9491	6.48574	0.0225213	0.190827	0.15179	CLSTN1	1
GO:1903540	establishment of protein localization to postsynaptic membrane	1/27	16/18986	0.0625	43.9491	6.48574	0.0225213	0.190827	0.15179	CLSTN1	1
GO:0043254	regulation of protein-containing complex assembly	3/27	433/18986	0.00692841	4.87195	3.07572	0.0229676	0.190827	0.15179	ISG15/PRKCZ/CTNNBIP1	3
GO:1903706	regulation of hemopoiesis	3/27	433/18986	0.00692841	4.87195	3.07572	0.0229676	0.190827	0.15179	ISG15/PRKCZ/CTNNBIP1	3
GO:0051963	regulation of synapse assembly	2/27	168/18986	0.0119048	8.37125	3.6215	0.0236345	0.190827	0.15179	AGRN/CLSTN1	2
GO:0060253	negative regulation of glial cell proliferation	1/27	17/18986	0.0588235	41.3638	6.2831	0.0239126	0.190827	0.15179	SKI	1
GO:0019362	pyridine nucleotide metabolic process	2/27	172/18986	0.0116279	8.17657	3.56796	0.024691	0.190827	0.15179	NADK/H6PD	2
GO:0046496	nicotinamide nucleotide metabolic process	2/27	172/18986	0.0116279	8.17657	3.56796	0.024691	0.190827	0.15179	NADK/H6PD	2
GO:0002830	positive regulation of type 2 immune response	1/27	18/18986	0.0555556	39.0658	6.09734	0.0253019	0.190827	0.15179	PRKCZ	1
GO:0032926	negative regulation of activin receptor signaling pathway	1/27	18/18986	0.0555556	39.0658	6.09734	0.0253019	0.190827	0.15179	SKI	1
GO:0045064	T-helper 2 cell differentiation	1/27	18/18986	0.0555556	39.0658	6.09734	0.0253019	0.190827	0.15179	PRKCZ	1
GO:0098696	regulation of neurotransmitter receptor localization to postsynaptic specialization membrane	1/27	18/18986	0.0555556	39.0658	6.09734	0.0253019	0.190827	0.15179	PRKCZ	1
GO:0098915	membrane repolarization during ventricular cardiac muscle cell action potential	1/27	18/18986	0.0555556	39.0658	6.09734	0.0253019	0.190827	0.15179	RNF207	1
GO:0050806	positive regulation of synaptic transmission	2/27	176/18986	0.0113636	7.99074	3.51613	0.0257666	0.190827	0.15179	PRKCZ/CLSTN1	2
GO:0001503	ossification	3/27	456/18986	0.00657895	4.62622	2.95786	0.0262623	0.190827	0.15179	ISG15/SKI/CTNNBIP1	3
GO:0072524	pyridine-containing compound metabolic process	2/27	178/18986	0.011236	7.90096	3.49082	0.0263116	0.190827	0.15179	NADK/H6PD	2
GO:0035743	CD4-positive, alpha-beta T cell cytokine production	1/27	19/18986	0.0526316	37.0097	5.92621	0.0266893	0.190827	0.15179	PRKCZ	1
GO:0048490	anterograde synaptic vesicle transport	1/27	19/18986	0.0526316	37.0097	5.92621	0.0266893	0.190827	0.15179	KIF1B	1
GO:0099514	synaptic vesicle cytoskeletal transport	1/27	19/18986	0.0526316	37.0097	5.92621	0.0266893	0.190827	0.15179	KIF1B	1
GO:0099517	synaptic vesicle transport along microtubule	1/27	19/18986	0.0526316	37.0097	5.92621	0.0266893	0.190827	0.15179	KIF1B	1
GO:0051960	regulation of nervous system development	3/27	463/18986	0.00647948	4.55628	2.92354	0.0273134	0.190827	0.15179	AGRN/SKI/CLSTN1	3
GO:0042391	regulation of membrane potential	3/27	466/18986	0.00643777	4.52694	2.90904	0.0277708	0.190827	0.15179	PRKCZ/RNF207/SLC25A33	3
GO:0006098	pentose-phosphate shunt	1/27	20/18986	0.05	35.1593	5.76786	0.0280749	0.190827	0.15179	H6PD	1
GO:0032634	interleukin-5 production	1/27	20/18986	0.05	35.1593	5.76786	0.0280749	0.190827	0.15179	PRKCZ	1
GO:0032674	regulation of interleukin-5 production	1/27	20/18986	0.05	35.1593	5.76786	0.0280749	0.190827	0.15179	PRKCZ	1
GO:0045655	regulation of monocyte differentiation	1/27	20/18986	0.05	35.1593	5.76786	0.0280749	0.190827	0.15179	CTNNBIP1	1
GO:0072662	protein localization to peroxisome	1/27	20/18986	0.05	35.1593	5.76786	0.0280749	0.190827	0.15179	PEX14	1
GO:0072663	establishment of protein localization to peroxisome	1/27	20/18986	0.05	35.1593	5.76786	0.0280749	0.190827	0.15179	PEX14	1
GO:0007213	G protein-coupled acetylcholine receptor signaling pathway	1/27	21/18986	0.047619	33.485	5.62077	0.0294585	0.190827	0.15179	AGRN	1
GO:0010566	regulation of ketone biosynthetic process	1/27	21/18986	0.047619	33.485	5.62077	0.0294585	0.190827	0.15179	H6PD	1
GO:0032616	interleukin-13 production	1/27	21/18986	0.047619	33.485	5.62077	0.0294585	0.190827	0.15179	PRKCZ	1
GO:0032656	regulation of interleukin-13 production	1/27	21/18986	0.047619	33.485	5.62077	0.0294585	0.190827	0.15179	PRKCZ	1
GO:0090713	immunological memory process	1/27	21/18986	0.047619	33.485	5.62077	0.0294585	0.190827	0.15179	TNFRSF14	1
GO:0007018	microtubule-based movement	3/27	480/18986	0.00625	4.39491	2.84297	0.0299599	0.190827	0.15179	PRKCZ/KIF1B/PEX14	3
GO:0002089	lens morphogenesis in camera-type eye	1/27	22/18986	0.0454545	31.963	5.48363	0.0308402	0.190827	0.15179	SKI	1
GO:0006390	mitochondrial transcription	1/27	22/18986	0.0454545	31.963	5.48363	0.0308402	0.190827	0.15179	SLC25A33	1
GO:0015919	peroxisomal membrane transport	1/27	22/18986	0.0454545	31.963	5.48363	0.0308402	0.190827	0.15179	PEX14	1
GO:0043574	peroxisomal transport	1/27	22/18986	0.0454545	31.963	5.48363	0.0308402	0.190827	0.15179	PEX14	1
GO:1902644	tertiary alcohol metabolic process	1/27	22/18986	0.0454545	31.963	5.48363	0.0308402	0.190827	0.15179	H6PD	1
GO:1902107	positive regulation of leukocyte differentiation	2/27	195/18986	0.0102564	7.21216	3.29052	0.0311311	0.190827	0.15179	PRKCZ/CTNNBIP1	2
GO:1903708	positive regulation of hemopoiesis	2/27	195/18986	0.0102564	7.21216	3.29052	0.0311311	0.190827	0.15179	PRKCZ/CTNNBIP1	2
GO:0051656	establishment of organelle localization	3/27	488/18986	0.00614754	4.32286	2.80633	0.0312512	0.190827	0.15179	PRKCZ/KIF1B/PEX14	3
GO:0002700	regulation of production of molecular mediator of immune response	2/27	196/18986	0.0102041	7.17536	3.27949	0.0314248	0.190827	0.15179	PRKCZ/TNFRSF14	2
GO:0046631	alpha-beta T cell activation	2/27	196/18986	0.0102041	7.17536	3.27949	0.0314248	0.190827	0.15179	PRKCZ/TNFRSF14	2
GO:0016049	cell growth	3/27	490/18986	0.00612245	4.30522	2.7973	0.0315787	0.190827	0.15179	PRKCZ/SLC25A33/CLSTN1	3
GO:0006740	NADPH regeneration	1/27	23/18986	0.0434783	30.5733	5.35537	0.0322201	0.190827	0.15179	H6PD	1
GO:0008090	retrograde axonal transport	1/27	23/18986	0.0434783	30.5733	5.35537	0.0322201	0.190827	0.15179	KIF1B	1
GO:0032253	dense core granule localization	1/27	23/18986	0.0434783	30.5733	5.35537	0.0322201	0.190827	0.15179	KIF1B	1
GO:0035493	SNARE complex assembly	1/27	23/18986	0.0434783	30.5733	5.35537	0.0322201	0.190827	0.15179	VAMP3	1
GO:0048015	phosphatidylinositol-mediated signaling	1/27	23/18986	0.0434783	30.5733	5.35537	0.0322201	0.190827	0.15179	PLCH2	1
GO:0002009	morphogenesis of an epithelium	3/27	500/18986	0.006	4.21911	2.75283	0.0332433	0.190827	0.15179	SKI/RNF207/CTNNBIP1	3
GO:0032528	microvillus organization	1/27	24/18986	0.0416667	29.2994	5.23504	0.033598	0.190827	0.15179	ESPN	1
GO:0046628	positive regulation of insulin receptor signaling pathway	1/27	24/18986	0.0416667	29.2994	5.23504	0.033598	0.190827	0.15179	PRKCZ	1
GO:0046885	regulation of hormone biosynthetic process	1/27	24/18986	0.0416667	29.2994	5.23504	0.033598	0.190827	0.15179	H6PD	1
GO:0060339	negative regulation of type I interferon-mediated signaling pathway	1/27	24/18986	0.0416667	29.2994	5.23504	0.033598	0.190827	0.15179	ISG15	1
GO:0051650	establishment of vesicle localization	2/27	205/18986	0.0097561	6.86034	3.18361	0.0341179	0.190827	0.15179	PRKCZ/KIF1B	2
GO:0050777	negative regulation of immune response	2/27	207/18986	0.00966184	6.79406	3.16309	0.0347284	0.190827	0.15179	ISG15/TNFRSF14	2
GO:0001919	regulation of receptor recycling	1/27	25/18986	0.04	28.1274	5.12185	0.0349741	0.190827	0.15179	VAMP3	1
GO:0002082	regulation of oxidative phosphorylation	1/27	25/18986	0.04	28.1274	5.12185	0.0349741	0.190827	0.15179	SLC25A33	1
GO:0008211	glucocorticoid metabolic process	1/27	25/18986	0.04	28.1274	5.12185	0.0349741	0.190827	0.15179	H6PD	1
GO:0034453	microtubule anchoring	1/27	25/18986	0.04	28.1274	5.12185	0.0349741	0.190827	0.15179	PEX14	1
GO:0060307	regulation of ventricular cardiac muscle cell membrane repolarization	1/27	25/18986	0.04	28.1274	5.12185	0.0349741	0.190827	0.15179	RNF207	1
GO:0001835	blastocyst hatching	1/27	26/18986	0.0384615	27.0456	5.01512	0.0363483	0.190827	0.15179	SLC35E2B	1
GO:0007274	neuromuscular synaptic transmission	1/27	26/18986	0.0384615	27.0456	5.01512	0.0363483	0.190827	0.15179	KIF1B	1
GO:0032252	secretory granule localization	1/27	26/18986	0.0384615	27.0456	5.01512	0.0363483	0.190827	0.15179	KIF1B	1
GO:0035188	hatching	1/27	26/18986	0.0384615	27.0456	5.01512	0.0363483	0.190827	0.15179	SLC35E2B	1
GO:0045624	positive regulation of T-helper cell differentiation	1/27	26/18986	0.0384615	27.0456	5.01512	0.0363483	0.190827	0.15179	PRKCZ	1
GO:0071684	organism emergence from protective structure	1/27	26/18986	0.0384615	27.0456	5.01512	0.0363483	0.190827	0.15179	SLC35E2B	1
GO:0090128	regulation of synapse maturation	1/27	26/18986	0.0384615	27.0456	5.01512	0.0363483	0.190827	0.15179	CLSTN1	1
GO:1900078	positive regulation of cellular response to insulin stimulus	1/27	26/18986	0.0384615	27.0456	5.01512	0.0363483	0.190827	0.15179	PRKCZ	1
GO:0032869	cellular response to insulin stimulus	2/27	213/18986	0.00938967	6.60268	3.10312	0.0365855	0.190827	0.15179	PRKCZ/SLC25A33	2
GO:0032753	positive regulation of interleukin-4 production	1/27	27/18986	0.037037	26.0439	4.91423	0.0377206	0.190827	0.15179	PRKCZ	1
GO:0032925	regulation of activin receptor signaling pathway	1/27	27/18986	0.037037	26.0439	4.91423	0.0377206	0.190827	0.15179	SKI	1
GO:1901679	nucleotide transmembrane transport	1/27	27/18986	0.037037	26.0439	4.91423	0.0377206	0.190827	0.15179	SLC25A33	1
GO:0045637	regulation of myeloid cell differentiation	2/27	219/18986	0.00913242	6.42178	3.04541	0.0384806	0.190827	0.15179	ISG15/CTNNBIP1	2
GO:0002726	positive regulation of T cell cytokine production	1/27	28/18986	0.0357143	25.1138	4.81867	0.039091	0.190827	0.15179	PRKCZ	1
GO:0019359	nicotinamide nucleotide biosynthetic process	1/27	28/18986	0.0357143	25.1138	4.81867	0.039091	0.190827	0.15179	NADK	1
GO:0019363	pyridine nucleotide biosynthetic process	1/27	28/18986	0.0357143	25.1138	4.81867	0.039091	0.190827	0.15179	NADK	1
GO:0034643	establishment of mitochondrion localization, microtubule-mediated	1/27	28/18986	0.0357143	25.1138	4.81867	0.039091	0.190827	0.15179	KIF1B	1
GO:0047497	mitochondrion transport along microtubule	1/27	28/18986	0.0357143	25.1138	4.81867	0.039091	0.190827	0.15179	KIF1B	1
GO:0086013	membrane repolarization during cardiac muscle cell action potential	1/27	28/18986	0.0357143	25.1138	4.81867	0.039091	0.190827	0.15179	RNF207	1
GO:0099558	maintenance of synapse structure	1/27	28/18986	0.0357143	25.1138	4.81867	0.039091	0.190827	0.15179	SDF4	1
GO:0099637	neurotransmitter receptor transport	1/27	28/18986	0.0357143	25.1138	4.81867	0.039091	0.190827	0.15179	CLSTN1	1
GO:1902473	regulation of protein localization to synapse	1/27	28/18986	0.0357143	25.1138	4.81867	0.039091	0.190827	0.15179	PRKCZ	1
GO:1902683	regulation of receptor localization to synapse	1/27	28/18986	0.0357143	25.1138	4.81867	0.039091	0.190827	0.15179	PRKCZ	1
GO:0002819	regulation of adaptive immune response	2/27	221/18986	0.00904977	6.36367	3.02666	0.0391206	0.190827	0.15179	PRKCZ/TNFRSF14	2
GO:0051648	vesicle localization	2/27	225/18986	0.00888889	6.25053	2.98983	0.040413	0.191783	0.15255	PRKCZ/KIF1B	2
GO:0006353	DNA-templated transcription termination	1/27	29/18986	0.0344828	24.2478	4.72797	0.0404595	0.191783	0.15255	SSU72	1
GO:0022011	myelination in peripheral nervous system	1/27	29/18986	0.0344828	24.2478	4.72797	0.0404595	0.191783	0.15255	SKI	1
GO:0032292	peripheral nervous system axon ensheathment	1/27	29/18986	0.0344828	24.2478	4.72797	0.0404595	0.191783	0.15255	SKI	1
GO:0051156	glucose 6-phosphate metabolic process	1/27	29/18986	0.0344828	24.2478	4.72797	0.0404595	0.191783	0.15255	H6PD	1
GO:0000002	mitochondrial genome maintenance	1/27	30/18986	0.0333333	23.4395	4.64173	0.0418261	0.194922	0.155048	SLC25A33	1
GO:0099623	regulation of cardiac muscle cell membrane repolarization	1/27	30/18986	0.0333333	23.4395	4.64173	0.0418261	0.194922	0.155048	RNF207	1
GO:0120255	olefinic compound biosynthetic process	1/27	30/18986	0.0333333	23.4395	4.64173	0.0418261	0.194922	0.155048	H6PD	1
GO:0002440	production of molecular mediator of immune response	2/27	230/18986	0.00869565	6.11465	2.94503	0.0420512	0.194922	0.155048	PRKCZ/TNFRSF14	2
GO:0051491	positive regulation of filopodium assembly	1/27	31/18986	0.0322581	22.6834	4.55959	0.0431909	0.195877	0.155807	AGRN	1
GO:0065002	intracellular protein transmembrane transport	1/27	31/18986	0.0322581	22.6834	4.55959	0.0431909	0.195877	0.155807	PEX14	1
GO:0072525	pyridine-containing compound biosynthetic process	1/27	31/18986	0.0322581	22.6834	4.55959	0.0431909	0.195877	0.155807	NADK	1
GO:0099625	ventricular cardiac muscle cell membrane repolarization	1/27	31/18986	0.0322581	22.6834	4.55959	0.0431909	0.195877	0.155807	RNF207	1
GO:0060325	face morphogenesis	1/27	32/18986	0.03125	21.9745	4.48122	0.0445538	0.199897	0.159004	SKI	1
GO:0086011	membrane repolarization during action potential	1/27	32/18986	0.03125	21.9745	4.48122	0.0445538	0.199897	0.159004	RNF207	1
GO:0010464	regulation of mesenchymal cell proliferation	1/27	33/18986	0.030303	21.3086	4.40634	0.0459149	0.202362	0.160965	CTNNBIP1	1
GO:0035774	positive regulation of insulin secretion involved in cellular response to glucose stimulus	1/27	33/18986	0.030303	21.3086	4.40634	0.0459149	0.202362	0.160965	NADK	1
GO:0045648	positive regulation of erythrocyte differentiation	1/27	33/18986	0.030303	21.3086	4.40634	0.0459149	0.202362	0.160965	ISG15	1
GO:0002828	regulation of type 2 immune response	1/27	34/18986	0.0294118	20.6819	4.3347	0.047274	0.202362	0.160965	PRKCZ	1
GO:0051654	establishment of mitochondrion localization	1/27	34/18986	0.0294118	20.6819	4.3347	0.047274	0.202362	0.160965	KIF1B	1
GO:0099633	protein localization to postsynaptic specialization membrane	1/27	34/18986	0.0294118	20.6819	4.3347	0.047274	0.202362	0.160965	PRKCZ	1
GO:0099645	neurotransmitter receptor localization to postsynaptic specialization membrane	1/27	34/18986	0.0294118	20.6819	4.3347	0.047274	0.202362	0.160965	PRKCZ	1
GO:1903715	regulation of aerobic respiration	1/27	34/18986	0.0294118	20.6819	4.3347	0.047274	0.202362	0.160965	SLC25A33	1
GO:2000463	positive regulation of excitatory postsynaptic potential	1/27	34/18986	0.0294118	20.6819	4.3347	0.047274	0.202362	0.160965	PRKCZ	1
GO:0021772	olfactory bulb development	1/27	35/18986	0.0285714	20.091	4.26605	0.0486313	0.202993	0.161468	SKI	1
GO:0032633	interleukin-4 production	1/27	35/18986	0.0285714	20.091	4.26605	0.0486313	0.202993	0.161468	PRKCZ	1
GO:0032673	regulation of interleukin-4 production	1/27	35/18986	0.0285714	20.091	4.26605	0.0486313	0.202993	0.161468	PRKCZ	1
GO:0048147	negative regulation of fibroblast proliferation	1/27	35/18986	0.0285714	20.091	4.26605	0.0486313	0.202993	0.161468	SKI	1
GO:2000406	positive regulation of T cell migration	1/27	35/18986	0.0285714	20.091	4.26605	0.0486313	0.202993	0.161468	TNFRSF14	1
GO:0033002	muscle cell proliferation	2/27	252/18986	0.00793651	5.58083	2.76254	0.0495504	0.20458	0.16273	SKI/CTNNBIP1	2
GO:0030224	monocyte differentiation	1/27	36/18986	0.0277778	19.5329	4.2002	0.0499868	0.20458	0.16273	CTNNBIP1	1
GO:0050732	negative regulation of peptidyl-tyrosine phosphorylation	1/27	36/18986	0.0277778	19.5329	4.2002	0.0499868	0.20458	0.16273	PRKCZ	1
GO:0086005	ventricular cardiac muscle cell action potential	1/27	36/18986	0.0277778	19.5329	4.2002	0.0499868	0.20458	0.16273	RNF207	1
GO:0051222	positive regulation of protein transport	2/27	257/18986	0.0077821	5.47226	2.72405	0.0513186	0.205133	0.16317	NADK/PRKCZ	2
GO:0021988	olfactory lobe development	1/27	37/18986	0.027027	19.005	4.13695	0.0513404	0.205133	0.16317	SKI	1
GO:0043388	positive regulation of DNA binding	1/27	37/18986	0.027027	19.005	4.13695	0.0513404	0.205133	0.16317	SKI	1
GO:0099003	vesicle-mediated transport in synapse	2/27	258/18986	0.00775194	5.45105	2.71648	0.051675	0.205133	0.16317	TPRG1L/CLSTN1	2
GO:0045927	positive regulation of growth	2/27	259/18986	0.00772201	5.43	2.70894	0.0520323	0.205133	0.16317	AGRN/SLC25A33	2
GO:0050870	positive regulation of T cell activation	2/27	260/18986	0.00769231	5.40912	2.70144	0.0523905	0.205133	0.16317	PRKCZ/TNFRSF14	2
GO:0007031	peroxisome organization	1/27	38/18986	0.0263158	18.5049	4.07613	0.0526921	0.205133	0.16317	PEX14	1
GO:0043372	positive regulation of CD4-positive, alpha-beta T cell differentiation	1/27	38/18986	0.0263158	18.5049	4.07613	0.0526921	0.205133	0.16317	PRKCZ	1
GO:0001649	osteoblast differentiation	2/27	262/18986	0.00763359	5.36783	2.68656	0.0531096	0.205133	0.16317	SKI/CTNNBIP1	2
GO:0007616	long-term memory	1/27	39/18986	0.025641	18.0304	4.01759	0.0540419	0.205133	0.16317	PRKCZ	1
GO:0032350	regulation of hormone metabolic process	1/27	39/18986	0.025641	18.0304	4.01759	0.0540419	0.205133	0.16317	H6PD	1
GO:0044743	protein transmembrane import into intracellular organelle	1/27	39/18986	0.025641	18.0304	4.01759	0.0540419	0.205133	0.16317	PEX14	1
GO:0048741	skeletal muscle fiber development	1/27	39/18986	0.025641	18.0304	4.01759	0.0540419	0.205133	0.16317	SKI	1
GO:0060323	head morphogenesis	1/27	39/18986	0.025641	18.0304	4.01759	0.0540419	0.205133	0.16317	SKI	1
GO:0060392	negative regulation of SMAD protein signal transduction	1/27	39/18986	0.025641	18.0304	4.01759	0.0540419	0.205133	0.16317	SKI	1
GO:1901888	regulation of cell junction assembly	2/27	268/18986	0.00746269	5.24765	2.64281	0.0552883	0.205133	0.16317	AGRN/CLSTN1	2
GO:0002369	T cell cytokine production	1/27	40/18986	0.025	17.5796	3.96119	0.05539	0.205133	0.16317	PRKCZ	1
GO:0002724	regulation of T cell cytokine production	1/27	40/18986	0.025	17.5796	3.96119	0.05539	0.205133	0.16317	PRKCZ	1
GO:0031124	mRNA 3'-end processing	1/27	40/18986	0.025	17.5796	3.96119	0.05539	0.205133	0.16317	SSU72	1
GO:0060074	synapse maturation	1/27	40/18986	0.025	17.5796	3.96119	0.05539	0.205133	0.16317	CLSTN1	1
GO:0007416	synapse assembly	2/27	269/18986	0.00743494	5.22814	2.63565	0.0556546	0.205133	0.16317	AGRN/CLSTN1	2
GO:0017004	cytochrome complex assembly	1/27	41/18986	0.0243902	17.1509	3.90679	0.0567361	0.205133	0.16317	SLC25A33	1
GO:0032728	positive regulation of interferon-beta production	1/27	41/18986	0.0243902	17.1509	3.90679	0.0567361	0.205133	0.16317	ISG15	1
GO:0002699	positive regulation of immune effector process	2/27	272/18986	0.00735294	5.17048	2.61437	0.0567585	0.205133	0.16317	PRKCZ/TNFRSF14	2
GO:0097305	response to alcohol	2/27	275/18986	0.00727273	5.11407	2.5934	0.0578702	0.205133	0.16317	SDF4/H6PD	2
GO:0014044	Schwann cell development	1/27	42/18986	0.0238095	16.7425	3.85427	0.0580804	0.205133	0.16317	SKI	1
GO:0043001	Golgi to plasma membrane protein transport	1/27	42/18986	0.0238095	16.7425	3.85427	0.0580804	0.205133	0.16317	VAMP3	1
GO:0060251	regulation of glial cell proliferation	1/27	42/18986	0.0238095	16.7425	3.85427	0.0580804	0.205133	0.16317	SKI	1
GO:0060306	regulation of membrane repolarization	1/27	42/18986	0.0238095	16.7425	3.85427	0.0580804	0.205133	0.16317	RNF207	1
GO:0099622	cardiac muscle cell membrane repolarization	1/27	42/18986	0.0238095	16.7425	3.85427	0.0580804	0.205133	0.16317	RNF207	1
GO:1902742	apoptotic process involved in development	1/27	42/18986	0.0238095	16.7425	3.85427	0.0580804	0.205133	0.16317	KIF1B	1
GO:2000403	positive regulation of lymphocyte migration	1/27	42/18986	0.0238095	16.7425	3.85427	0.0580804	0.205133	0.16317	TNFRSF14	1
GO:0032868	response to insulin	2/27	276/18986	0.00724638	5.09554	2.58648	0.0582425	0.205133	0.16317	PRKCZ/SLC25A33	2
GO:0014904	myotube cell development	1/27	43/18986	0.0232558	16.3531	3.80353	0.0594229	0.205133	0.16317	SKI	1
GO:0042092	type 2 immune response	1/27	43/18986	0.0232558	16.3531	3.80353	0.0594229	0.205133	0.16317	PRKCZ	1
GO:0046640	regulation of alpha-beta T cell proliferation	1/27	43/18986	0.0232558	16.3531	3.80353	0.0594229	0.205133	0.16317	TNFRSF14	1
GO:0090150	establishment of protein localization to membrane	2/27	280/18986	0.00714286	5.02275	2.55912	0.0597401	0.205133	0.16317	VAMP3/CLSTN1	2
GO:0030501	positive regulation of bone mineralization	1/27	44/18986	0.0227273	15.9815	3.75446	0.0607636	0.205133	0.16317	ISG15	1
GO:0046627	negative regulation of insulin receptor signaling pathway	1/27	44/18986	0.0227273	15.9815	3.75446	0.0607636	0.205133	0.16317	PRKCZ	1
GO:1903039	positive regulation of leukocyte cell-cell adhesion	2/27	284/18986	0.00704225	4.95201	2.53228	0.0612513	0.205133	0.16317	PRKCZ/TNFRSF14	2
GO:0010463	mesenchymal cell proliferation	1/27	45/18986	0.0222222	15.6263	3.70698	0.0621023	0.205133	0.16317	CTNNBIP1	1
GO:0014014	negative regulation of gliogenesis	1/27	45/18986	0.0222222	15.6263	3.70698	0.0621023	0.205133	0.16317	SKI	1
GO:0030574	collagen catabolic process	1/27	45/18986	0.0222222	15.6263	3.70698	0.0621023	0.205133	0.16317	MMP23B	1
GO:0048489	synaptic vesicle transport	1/27	45/18986	0.0222222	15.6263	3.70698	0.0621023	0.205133	0.16317	KIF1B	1
GO:0060338	regulation of type I interferon-mediated signaling pathway	1/27	45/18986	0.0222222	15.6263	3.70698	0.0621023	0.205133	0.16317	ISG15	1
GO:0095500	acetylcholine receptor signaling pathway	1/27	45/18986	0.0222222	15.6263	3.70698	0.0621023	0.205133	0.16317	AGRN	1
GO:0120178	steroid hormone biosynthetic process	1/27	45/18986	0.0222222	15.6263	3.70698	0.0621023	0.205133	0.16317	H6PD	1
GO:1900077	negative regulation of cellular response to insulin stimulus	1/27	45/18986	0.0222222	15.6263	3.70698	0.0621023	0.205133	0.16317	PRKCZ	1
GO:1903426	regulation of reactive oxygen species biosynthetic process	1/27	45/18986	0.0222222	15.6263	3.70698	0.0621023	0.205133	0.16317	SLC25A33	1
GO:0045646	regulation of erythrocyte differentiation	1/27	46/18986	0.0217391	15.2866	3.66099	0.0634393	0.207543	0.165087	ISG15	1
GO:0046633	alpha-beta T cell proliferation	1/27	46/18986	0.0217391	15.2866	3.66099	0.0634393	0.207543	0.165087	TNFRSF14	1
GO:0033173	calcineurin-NFAT signaling cascade	1/27	47/18986	0.0212766	14.9614	3.61642	0.0647744	0.207543	0.165087	TPRG1L	1
GO:1905145	cellular response to acetylcholine	1/27	47/18986	0.0212766	14.9614	3.61642	0.0647744	0.207543	0.165087	AGRN	1
GO:0072659	protein localization to plasma membrane	2/27	295/18986	0.00677966	4.76736	2.461	0.0654749	0.207543	0.165087	PRKCZ/VAMP3	2
GO:0001881	receptor recycling	1/27	48/18986	0.0208333	14.6497	3.57319	0.0661077	0.207543	0.165087	VAMP3	1
GO:0006862	nucleotide transport	1/27	48/18986	0.0208333	14.6497	3.57319	0.0661077	0.207543	0.165087	SLC25A33	1
GO:0031295	T cell costimulation	1/27	48/18986	0.0208333	14.6497	3.57319	0.0661077	0.207543	0.165087	TNFRSF14	1
GO:0034331	cell junction maintenance	1/27	48/18986	0.0208333	14.6497	3.57319	0.0661077	0.207543	0.165087	SDF4	1
GO:0045622	regulation of T-helper cell differentiation	1/27	48/18986	0.0208333	14.6497	3.57319	0.0661077	0.207543	0.165087	PRKCZ	1
GO:2000516	positive regulation of CD4-positive, alpha-beta T cell activation	1/27	48/18986	0.0208333	14.6497	3.57319	0.0661077	0.207543	0.165087	PRKCZ	1
GO:0051962	positive regulation of nervous system development	2/27	297/18986	0.00673401	4.73525	2.44841	0.0662533	0.207543	0.165087	AGRN/CLSTN1	2
GO:0014037	Schwann cell differentiation	1/27	49/18986	0.0204082	14.3507	3.53123	0.0674392	0.207543	0.165087	SKI	1
GO:0031294	lymphocyte costimulation	1/27	49/18986	0.0204082	14.3507	3.53123	0.0674392	0.207543	0.165087	TNFRSF14	1
GO:0042551	neuron maturation	1/27	49/18986	0.0204082	14.3507	3.53123	0.0674392	0.207543	0.165087	AGRN	1
GO:0045197	establishment or maintenance of epithelial cell apical/basal polarity	1/27	49/18986	0.0204082	14.3507	3.53123	0.0674392	0.207543	0.165087	PRKCZ	1
GO:0046636	negative regulation of alpha-beta T cell activation	1/27	49/18986	0.0204082	14.3507	3.53123	0.0674392	0.207543	0.165087	TNFRSF14	1
GO:0097720	calcineurin-mediated signaling	1/27	49/18986	0.0204082	14.3507	3.53123	0.0674392	0.207543	0.165087	TPRG1L	1
GO:0042181	ketone biosynthetic process	1/27	50/18986	0.02	14.0637	3.49049	0.0687688	0.207543	0.165087	H6PD	1
GO:0043114	regulation of vascular permeability	1/27	50/18986	0.02	14.0637	3.49049	0.0687688	0.207543	0.165087	CTNNBIP1	1
GO:0051489	regulation of filopodium assembly	1/27	50/18986	0.02	14.0637	3.49049	0.0687688	0.207543	0.165087	AGRN	1
GO:0098815	modulation of excitatory postsynaptic potential	1/27	50/18986	0.02	14.0637	3.49049	0.0687688	0.207543	0.165087	PRKCZ	1
GO:1905144	response to acetylcholine	1/27	50/18986	0.02	14.0637	3.49049	0.0687688	0.207543	0.165087	AGRN	1
GO:2000404	regulation of T cell migration	1/27	50/18986	0.02	14.0637	3.49049	0.0687688	0.207543	0.165087	TNFRSF14	1
GO:0008089	anterograde axonal transport	1/27	51/18986	0.0196078	13.7879	3.4509	0.0700966	0.209292	0.166478	KIF1B	1
GO:0043457	regulation of cellular respiration	1/27	51/18986	0.0196078	13.7879	3.4509	0.0700966	0.209292	0.166478	SLC25A33	1
GO:0170036	import into the mitochondrion	1/27	51/18986	0.0196078	13.7879	3.4509	0.0700966	0.209292	0.166478	SLC25A33	1
GO:0000959	mitochondrial RNA metabolic process	1/27	52/18986	0.0192308	13.5228	3.41241	0.0714226	0.209523	0.166661	SLC25A33	1
GO:0007528	neuromuscular junction development	1/27	52/18986	0.0192308	13.5228	3.41241	0.0714226	0.209523	0.166661	AGRN	1
GO:0010171	body morphogenesis	1/27	52/18986	0.0192308	13.5228	3.41241	0.0714226	0.209523	0.166661	SKI	1
GO:0032924	activin receptor signaling pathway	1/27	52/18986	0.0192308	13.5228	3.41241	0.0714226	0.209523	0.166661	SKI	1
GO:0098926	postsynaptic signal transduction	1/27	52/18986	0.0192308	13.5228	3.41241	0.0714226	0.209523	0.166661	AGRN	1
GO:0050807	regulation of synapse organization	2/27	312/18986	0.00641026	4.5076	2.35748	0.0721911	0.209741	0.166835	AGRN/CLSTN1	2
GO:0035088	establishment or maintenance of apical/basal cell polarity	1/27	53/18986	0.0188679	13.2676	3.37496	0.0727467	0.209741	0.166835	PRKCZ	1
GO:0051646	mitochondrion localization	1/27	53/18986	0.0188679	13.2676	3.37496	0.0727467	0.209741	0.166835	KIF1B	1
GO:0060324	face development	1/27	53/18986	0.0188679	13.2676	3.37496	0.0727467	0.209741	0.166835	SKI	1
GO:0061245	establishment or maintenance of bipolar cell polarity	1/27	53/18986	0.0188679	13.2676	3.37496	0.0727467	0.209741	0.166835	PRKCZ	1
GO:0070169	positive regulation of biomineral tissue development	1/27	54/18986	0.0185185	13.0219	3.33851	0.0740691	0.212822	0.169285	ISG15	1
GO:0050803	regulation of synapse structure or activity	2/27	318/18986	0.00628931	4.42255	2.3227	0.0746141	0.213656	0.169949	AGRN/CLSTN1	2
GO:0045071	negative regulation of viral genome replication	1/27	55/18986	0.0181818	12.7852	3.30301	0.0753896	0.214413	0.170551	ISG15	1
GO:0045778	positive regulation of ossification	1/27	55/18986	0.0181818	12.7852	3.30301	0.0753896	0.214413	0.170551	ISG15	1
GO:0071375	cellular response to peptide hormone stimulus	2/27	321/18986	0.00623053	4.38122	2.30564	0.0758356	0.214528	0.170642	PRKCZ/SLC25A33	2
GO:0019058	viral life cycle	2/27	323/18986	0.00619195	4.35409	2.29438	0.0766535	0.214528	0.170642	ISG15/TNFRSF14	2
GO:0001954	positive regulation of cell-matrix adhesion	1/27	56/18986	0.0178571	12.5569	3.26843	0.0767083	0.214528	0.170642	PRKCZ	1
GO:0046605	regulation of centrosome cycle	1/27	56/18986	0.0178571	12.5569	3.26843	0.0767083	0.214528	0.170642	CCNL2	1
GO:0046638	positive regulation of alpha-beta T cell differentiation	1/27	56/18986	0.0178571	12.5569	3.26843	0.0767083	0.214528	0.170642	PRKCZ	1
GO:0009416	response to light stimulus	2/27	326/18986	0.00613497	4.31402	2.27765	0.0778858	0.216765	0.172422	SDF4/UBE4B	2
GO:0061178	regulation of insulin secretion involved in cellular response to glucose stimulus	1/27	57/18986	0.0175439	12.3366	3.23471	0.0780252	0.216765	0.172422	NADK	1
GO:1904951	positive regulation of establishment of protein localization	2/27	327/18986	0.00611621	4.30083	2.27212	0.078298	0.216805	0.172454	NADK/PRKCZ	2
GO:0050805	negative regulation of synaptic transmission	1/27	58/18986	0.0172414	12.1239	3.20182	0.0793403	0.217538	0.173037	TPRG1L	1
GO:0086009	membrane repolarization	1/27	58/18986	0.0172414	12.1239	3.20182	0.0793403	0.217538	0.173037	RNF207	1
GO:1902930	regulation of alcohol biosynthetic process	1/27	58/18986	0.0172414	12.1239	3.20182	0.0793403	0.217538	0.173037	H6PD	1
GO:0009948	anterior/posterior axis specification	1/27	59/18986	0.0169492	11.9184	3.16974	0.0806536	0.21902	0.174216	SKI	1
GO:0032608	interferon-beta production	1/27	60/18986	0.0166667	11.7198	3.13842	0.081965	0.21902	0.174216	ISG15	1
GO:0032648	regulation of interferon-beta production	1/27	60/18986	0.0166667	11.7198	3.13842	0.081965	0.21902	0.174216	ISG15	1
GO:0097479	synaptic vesicle localization	1/27	60/18986	0.0166667	11.7198	3.13842	0.081965	0.21902	0.174216	KIF1B	1
GO:1903409	reactive oxygen species biosynthetic process	1/27	60/18986	0.0166667	11.7198	3.13842	0.081965	0.21902	0.174216	SLC25A33	1
GO:0022409	positive regulation of cell-cell adhesion	2/27	336/18986	0.00595238	4.18563	2.22333	0.0820395	0.21902	0.174216	PRKCZ/TNFRSF14	2
GO:0051251	positive regulation of lymphocyte activation	2/27	336/18986	0.00595238	4.18563	2.22333	0.0820395	0.21902	0.174216	PRKCZ/TNFRSF14	2
GO:1902105	regulation of leukocyte differentiation	2/27	337/18986	0.00593472	4.17321	2.21802	0.0824586	0.21902	0.174216	PRKCZ/CTNNBIP1	2
GO:0001658	branching involved in ureteric bud morphogenesis	1/27	61/18986	0.0163934	11.5276	3.10783	0.0832747	0.21902	0.174216	CTNNBIP1	1
GO:0014009	glial cell proliferation	1/27	61/18986	0.0163934	11.5276	3.10783	0.0832747	0.21902	0.174216	SKI	1
GO:0043113	receptor clustering	1/27	61/18986	0.0163934	11.5276	3.10783	0.0832747	0.21902	0.174216	AGRN	1
GO:0060038	cardiac muscle cell proliferation	1/27	61/18986	0.0163934	11.5276	3.10783	0.0832747	0.21902	0.174216	SKI	1
GO:0098900	regulation of action potential	1/27	61/18986	0.0163934	11.5276	3.10783	0.0832747	0.21902	0.174216	RNF207	1
GO:0031400	negative regulation of protein modification process	2/27	342/18986	0.00584795	4.11219	2.19174	0.0845648	0.219705	0.174761	ISG15/PRKCZ	2
GO:0042742	defense response to bacterium	2/27	342/18986	0.00584795	4.11219	2.19174	0.0845648	0.219705	0.174761	ISG15/TNFRSF14	2
GO:0043370	regulation of CD4-positive, alpha-beta T cell differentiation	1/27	62/18986	0.016129	11.3417	3.07794	0.0845826	0.219705	0.174761	PRKCZ	1
GO:0086002	cardiac muscle cell action potential involved in contraction	1/27	62/18986	0.016129	11.3417	3.07794	0.0845826	0.219705	0.174761	RNF207	1
GO:0002763	positive regulation of myeloid leukocyte differentiation	1/27	64/18986	0.015625	10.9873	3.02018	0.087193	0.225092	0.179046	CTNNBIP1	1
GO:0019674	NAD metabolic process	1/27	64/18986	0.015625	10.9873	3.02018	0.087193	0.225092	0.179046	NADK	1
GO:0030111	regulation of Wnt signaling pathway	2/27	349/18986	0.00573066	4.02971	2.15579	0.0875415	0.225298	0.17921	SKI/CTNNBIP1	2
GO:0021700	developmental maturation	2/27	350/18986	0.00571429	4.0182	2.15073	0.0879693	0.225707	0.179535	AGRN/CLSTN1	2
GO:1905330	regulation of morphogenesis of an epithelium	1/27	65/18986	0.0153846	10.8182	2.99225	0.0884955	0.226365	0.180058	RNF207	1
GO:0001947	heart looping	1/27	66/18986	0.0151515	10.6543	2.96492	0.0897962	0.226925	0.180503	RNF207	1
GO:0006893	Golgi to plasma membrane transport	1/27	66/18986	0.0151515	10.6543	2.96492	0.0897962	0.226925	0.180503	VAMP3	1
GO:0044380	protein localization to cytoskeleton	1/27	66/18986	0.0151515	10.6543	2.96492	0.0897962	0.226925	0.180503	KLHL21	1
GO:0061951	establishment of protein localization to plasma membrane	1/27	66/18986	0.0151515	10.6543	2.96492	0.0897962	0.226925	0.180503	VAMP3	1
GO:0002820	negative regulation of adaptive immune response	1/27	67/18986	0.0149254	10.4953	2.93817	0.0910951	0.228146	0.181475	TNFRSF14	1
GO:0035773	insulin secretion involved in cellular response to glucose stimulus	1/27	67/18986	0.0149254	10.4953	2.93817	0.0910951	0.228146	0.181475	NADK	1
GO:0042446	hormone biosynthetic process	1/27	67/18986	0.0149254	10.4953	2.93817	0.0910951	0.228146	0.181475	H6PD	1
GO:0035019	somatic stem cell population maintenance	1/27	68/18986	0.0147059	10.341	2.91198	0.0923922	0.22934	0.182425	SKI	1
GO:0045668	negative regulation of osteoblast differentiation	1/27	68/18986	0.0147059	10.341	2.91198	0.0923922	0.22934	0.182425	SKI	1
GO:0060675	ureteric bud morphogenesis	1/27	68/18986	0.0147059	10.341	2.91198	0.0923922	0.22934	0.182425	CTNNBIP1	1
GO:0031589	cell-substrate adhesion	2/27	361/18986	0.00554017	3.89576	2.09627	0.0927183	0.229471	0.182529	PRKCZ/VAMP3	2
GO:0072171	mesonephric tubule morphogenesis	1/27	69/18986	0.0144928	10.1911	2.88632	0.0936876	0.23051	0.183355	CTNNBIP1	1
GO:0098930	axonal transport	1/27	69/18986	0.0144928	10.1911	2.88632	0.0936876	0.23051	0.183355	KIF1B	1
GO:0046847	filopodium assembly	1/27	70/18986	0.0142857	10.0455	2.86119	0.0949811	0.231655	0.184266	AGRN	1
GO:0048662	negative regulation of smooth muscle cell proliferation	1/27	70/18986	0.0142857	10.0455	2.86119	0.0949811	0.231655	0.184266	CTNNBIP1	1
GO:2000401	regulation of lymphocyte migration	1/27	70/18986	0.0142857	10.0455	2.86119	0.0949811	0.231655	0.184266	TNFRSF14	1
GO:0061371	determination of heart left/right asymmetry	1/27	71/18986	0.0140845	9.90402	2.83656	0.0962729	0.234125	0.18623	RNF207	1
GO:0002696	positive regulation of leukocyte activation	2/27	371/18986	0.00539084	3.79076	2.0486	0.097101	0.235216	0.187099	PRKCZ/TNFRSF14	2
GO:0003143	embryonic heart tube morphogenesis	1/27	72/18986	0.0138889	9.76646	2.81241	0.0975629	0.235216	0.187099	RNF207	1
GO:0046626	regulation of insulin receptor signaling pathway	1/27	72/18986	0.0138889	9.76646	2.81241	0.0975629	0.235216	0.187099	PRKCZ	1
GO:0051101	regulation of DNA binding	1/27	73/18986	0.0136986	9.63267	2.78873	0.0988512	0.236663	0.18825	SKI	1
GO:0051881	regulation of mitochondrial membrane potential	1/27	73/18986	0.0136986	9.63267	2.78873	0.0988512	0.236663	0.18825	SLC25A33	1
GO:0030514	negative regulation of BMP signaling pathway	1/27	74/18986	0.0135135	9.5025	2.7655	0.100138	0.236663	0.18825	SKI	1
GO:0042130	negative regulation of T cell proliferation	1/27	74/18986	0.0135135	9.5025	2.7655	0.100138	0.236663	0.18825	TNFRSF14	1
GO:0043112	receptor metabolic process	1/27	74/18986	0.0135135	9.5025	2.7655	0.100138	0.236663	0.18825	VAMP3	1
GO:0060260	regulation of transcription initiation by RNA polymerase II	1/27	74/18986	0.0135135	9.5025	2.7655	0.100138	0.236663	0.18825	CTNNBIP1	1
GO:0071806	protein transmembrane transport	1/27	74/18986	0.0135135	9.5025	2.7655	0.100138	0.236663	0.18825	PEX14	1
GO:0002711	positive regulation of T cell mediated immunity	1/27	75/18986	0.0133333	9.3758	2.74271	0.101422	0.237691	0.189067	PRKCZ	1
GO:0032481	positive regulation of type I interferon production	1/27	75/18986	0.0133333	9.3758	2.74271	0.101422	0.237691	0.189067	ISG15	1
GO:0046635	positive regulation of alpha-beta T cell activation	1/27	75/18986	0.0133333	9.3758	2.74271	0.101422	0.237691	0.189067	PRKCZ	1
GO:0072678	T cell migration	1/27	76/18986	0.0131579	9.25244	2.72034	0.102705	0.239683	0.190652	TNFRSF14	1
GO:0032729	positive regulation of type II interferon production	1/27	77/18986	0.012987	9.13228	2.69838	0.103986	0.239683	0.190652	ISG15	1
GO:0043954	cellular component maintenance	1/27	77/18986	0.012987	9.13228	2.69838	0.103986	0.239683	0.190652	SDF4	1
GO:0045669	positive regulation of osteoblast differentiation	1/27	77/18986	0.012987	9.13228	2.69838	0.103986	0.239683	0.190652	CTNNBIP1	1
GO:0051966	regulation of synaptic transmission, glutamatergic	1/27	77/18986	0.012987	9.13228	2.69838	0.103986	0.239683	0.190652	TPRG1L	1
GO:1900076	regulation of cellular response to insulin stimulus	1/27	77/18986	0.012987	9.13228	2.69838	0.103986	0.239683	0.190652	PRKCZ	1
GO:0072078	nephron tubule morphogenesis	1/27	78/18986	0.0128205	9.01519	2.67681	0.105266	0.241967	0.192469	CTNNBIP1	1
GO:0050867	positive regulation of cell activation	2/27	391/18986	0.00511509	3.59686	1.95802	0.106043	0.242908	0.193217	PRKCZ/TNFRSF14	2
GO:1903037	regulation of leukocyte cell-cell adhesion	2/27	392/18986	0.00510204	3.58768	1.95365	0.106497	0.242908	0.193217	PRKCZ/TNFRSF14	2
GO:0055117	regulation of cardiac muscle contraction	1/27	79/18986	0.0126582	8.90108	2.65563	0.106544	0.242908	0.193217	RNF207	1
GO:0050863	regulation of T cell activation	2/27	393/18986	0.00508906	3.57855	1.94929	0.10695	0.243173	0.193428	PRKCZ/TNFRSF14	2
GO:0046637	regulation of alpha-beta T cell differentiation	1/27	80/18986	0.0125	8.78981	2.63482	0.107819	0.243173	0.193428	PRKCZ	1
GO:0060390	regulation of SMAD protein signal transduction	1/27	80/18986	0.0125	8.78981	2.63482	0.107819	0.243173	0.193428	SKI	1
GO:0072088	nephron epithelium morphogenesis	1/27	80/18986	0.0125	8.78981	2.63482	0.107819	0.243173	0.193428	CTNNBIP1	1
GO:0031397	negative regulation of protein ubiquitination	1/27	81/18986	0.0123457	8.6813	2.61438	0.109094	0.244731	0.194667	ISG15	1
GO:0042093	T-helper cell differentiation	1/27	81/18986	0.0123457	8.6813	2.61438	0.109094	0.244731	0.194667	PRKCZ	1
GO:0001843	neural tube closure	1/27	82/18986	0.0121951	8.57543	2.59428	0.110366	0.244966	0.194854	SKI	1
GO:0030500	regulation of bone mineralization	1/27	82/18986	0.0121951	8.57543	2.59428	0.110366	0.244966	0.194854	ISG15	1
GO:0061333	renal tubule morphogenesis	1/27	82/18986	0.0121951	8.57543	2.59428	0.110366	0.244966	0.194854	CTNNBIP1	1
GO:0072028	nephron morphogenesis	1/27	82/18986	0.0121951	8.57543	2.59428	0.110366	0.244966	0.194854	CTNNBIP1	1
GO:0002294	CD4-positive, alpha-beta T cell differentiation involved in immune response	1/27	83/18986	0.0120482	8.47211	2.57452	0.111637	0.244989	0.194873	PRKCZ	1
GO:0008088	axo-dendritic transport	1/27	83/18986	0.0120482	8.47211	2.57452	0.111637	0.244989	0.194873	KIF1B	1
GO:0060606	tube closure	1/27	83/18986	0.0120482	8.47211	2.57452	0.111637	0.244989	0.194873	SKI	1
GO:2000142	regulation of DNA-templated transcription initiation	1/27	83/18986	0.0120482	8.47211	2.57452	0.111637	0.244989	0.194873	CTNNBIP1	1
GO:0002287	alpha-beta T cell activation involved in immune response	1/27	84/18986	0.0119048	8.37125	2.55509	0.112905	0.244989	0.194873	PRKCZ	1
GO:0002293	alpha-beta T cell differentiation involved in immune response	1/27	84/18986	0.0119048	8.37125	2.55509	0.112905	0.244989	0.194873	PRKCZ	1
GO:2000514	regulation of CD4-positive, alpha-beta T cell activation	1/27	84/18986	0.0119048	8.37125	2.55509	0.112905	0.244989	0.194873	PRKCZ	1
GO:0001558	regulation of cell growth	2/27	408/18986	0.00490196	3.44699	1.88557	0.113818	0.244989	0.194873	SLC25A33/CLSTN1	2
GO:0014855	striated muscle cell proliferation	1/27	85/18986	0.0117647	8.27277	2.53598	0.114173	0.244989	0.194873	SKI	1
GO:0045069	regulation of viral genome replication	1/27	85/18986	0.0117647	8.27277	2.53598	0.114173	0.244989	0.194873	ISG15	1
GO:0060337	type I interferon-mediated signaling pathway	1/27	85/18986	0.0117647	8.27277	2.53598	0.114173	0.244989	0.194873	ISG15	1
GO:0086001	cardiac muscle cell action potential	1/27	85/18986	0.0117647	8.27277	2.53598	0.114173	0.244989	0.194873	RNF207	1
GO:0086003	cardiac muscle cell contraction	1/27	85/18986	0.0117647	8.27277	2.53598	0.114173	0.244989	0.194873	RNF207	1
GO:0002697	regulation of immune effector process	2/27	410/18986	0.00487805	3.43017	1.87729	0.114743	0.245196	0.195037	PRKCZ/TNFRSF14	2
GO:0035050	embryonic heart tube development	1/27	86/18986	0.0116279	8.17657	2.51718	0.115438	0.245196	0.195037	RNF207	1
GO:0050810	regulation of steroid biosynthetic process	1/27	86/18986	0.0116279	8.17657	2.51718	0.115438	0.245196	0.195037	H6PD	1
GO:0071357	cellular response to type I interferon	1/27	86/18986	0.0116279	8.17657	2.51718	0.115438	0.245196	0.195037	ISG15	1
GO:0007422	peripheral nervous system development	1/27	87/18986	0.0114943	8.08259	2.49869	0.116702	0.246631	0.196179	SKI	1
GO:0014020	primary neural tube formation	1/27	87/18986	0.0114943	8.08259	2.49869	0.116702	0.246631	0.196179	SKI	1
GO:0032024	positive regulation of insulin secretion	1/27	88/18986	0.0113636	7.99074	2.48048	0.117964	0.248672	0.197802	NADK	1
GO:0048145	regulation of fibroblast proliferation	1/27	90/18986	0.0111111	7.81317	2.44492	0.120482	0.252711	0.201015	SKI	1
GO:0050672	negative regulation of lymphocyte proliferation	1/27	90/18986	0.0111111	7.81317	2.44492	0.120482	0.252711	0.201015	TNFRSF14	1
GO:0002088	lens development in camera-type eye	1/27	91/18986	0.010989	7.72731	2.42755	0.121739	0.254167	0.202173	SKI	1
GO:0002292	T cell differentiation involved in immune response	1/27	92/18986	0.0108696	7.64332	2.41044	0.122994	0.254167	0.202173	PRKCZ	1
GO:0032945	negative regulation of mononuclear cell proliferation	1/27	92/18986	0.0108696	7.64332	2.41044	0.122994	0.254167	0.202173	TNFRSF14	1
GO:0034340	response to type I interferon	1/27	92/18986	0.0108696	7.64332	2.41044	0.122994	0.254167	0.202173	ISG15	1
GO:0055017	cardiac muscle tissue growth	1/27	92/18986	0.0108696	7.64332	2.41044	0.122994	0.254167	0.202173	SKI	1
GO:0060021	roof of mouth development	1/27	92/18986	0.0108696	7.64332	2.41044	0.122994	0.254167	0.202173	SKI	1
GO:0007159	leukocyte cell-cell adhesion	2/27	430/18986	0.00465116	3.27063	1.79729	0.124098	0.255499	0.203232	PRKCZ/TNFRSF14	2
GO:0045824	negative regulation of innate immune response	1/27	93/18986	0.0107527	7.56113	2.39359	0.124247	0.255499	0.203232	ISG15	1
GO:0001841	neural tube formation	1/27	94/18986	0.0106383	7.48069	2.37698	0.125499	0.255567	0.203286	SKI	1
GO:0031123	RNA 3'-end processing	1/27	94/18986	0.0106383	7.48069	2.37698	0.125499	0.255567	0.203286	SSU72	1
GO:0071677	positive regulation of mononuclear cell migration	1/27	94/18986	0.0106383	7.48069	2.37698	0.125499	0.255567	0.203286	TNFRSF14	1
GO:1903321	negative regulation of protein modification by small protein conjugation or removal	1/27	94/18986	0.0106383	7.48069	2.37698	0.125499	0.255567	0.203286	ISG15	1
GO:0032465	regulation of cytokinesis	1/27	95/18986	0.0105263	7.40195	2.36062	0.126749	0.257487	0.204814	KLHL21	1
GO:0006163	purine nucleotide metabolic process	2/27	440/18986	0.00454545	3.1963	1.75902	0.128846	0.258869	0.205913	NADK/H6PD	2
GO:0051899	membrane depolarization	1/27	97/18986	0.0103093	7.24933	2.3286	0.129243	0.258869	0.205913	PRKCZ	1
GO:0060395	SMAD protein signal transduction	1/27	97/18986	0.0103093	7.24933	2.3286	0.129243	0.258869	0.205913	SKI	1
GO:0009314	response to radiation	2/27	442/18986	0.00452489	3.18183	1.7515	0.129801	0.258869	0.205913	SDF4/UBE4B	2
GO:0071346	cellular response to type II interferon	1/27	98/18986	0.0102041	7.17536	2.31293	0.130488	0.258869	0.205913	VAMP3	1
GO:1901874	negative regulation of post-translational protein modification	1/27	98/18986	0.0102041	7.17536	2.31293	0.130488	0.258869	0.205913	ISG15	1
GO:0043434	response to peptide hormone	2/27	446/18986	0.0044843	3.1533	1.73658	0.131716	0.258869	0.205913	PRKCZ/SLC25A33	2
GO:0051223	regulation of protein transport	2/27	446/18986	0.0044843	3.1533	1.73658	0.131716	0.258869	0.205913	NADK/PRKCZ	2
GO:0009798	axis specification	1/27	99/18986	0.010101	7.10288	2.29747	0.131731	0.258869	0.205913	SKI	1
GO:0048525	negative regulation of viral process	1/27	99/18986	0.010101	7.10288	2.29747	0.131731	0.258869	0.205913	ISG15	1
GO:0060993	kidney morphogenesis	1/27	99/18986	0.010101	7.10288	2.29747	0.131731	0.258869	0.205913	CTNNBIP1	1
GO:0070664	negative regulation of leukocyte proliferation	1/27	99/18986	0.010101	7.10288	2.29747	0.131731	0.258869	0.205913	TNFRSF14	1
GO:0001657	ureteric bud development	1/27	100/18986	0.01	7.03185	2.28223	0.132972	0.258869	0.205913	CTNNBIP1	1
GO:0060349	bone morphogenesis	1/27	100/18986	0.01	7.03185	2.28223	0.132972	0.258869	0.205913	SKI	1
GO:0060419	heart growth	1/27	100/18986	0.01	7.03185	2.28223	0.132972	0.258869	0.205913	SKI	1
GO:0030099	myeloid cell differentiation	2/27	451/18986	0.00443459	3.11834	1.71817	0.13412	0.258869	0.205913	ISG15/CTNNBIP1	2
GO:0006942	regulation of striated muscle contraction	1/27	101/18986	0.00990099	6.96223	2.2672	0.134211	0.258869	0.205913	RNF207	1
GO:0034446	substrate adhesion-dependent cell spreading	1/27	101/18986	0.00990099	6.96223	2.2672	0.134211	0.258869	0.205913	VAMP3	1
GO:0072080	nephron tubule development	1/27	101/18986	0.00990099	6.96223	2.2672	0.134211	0.258869	0.205913	CTNNBIP1	1
GO:0072163	mesonephric epithelium development	1/27	101/18986	0.00990099	6.96223	2.2672	0.134211	0.258869	0.205913	CTNNBIP1	1
GO:0072164	mesonephric tubule development	1/27	101/18986	0.00990099	6.96223	2.2672	0.134211	0.258869	0.205913	CTNNBIP1	1
GO:0007005	mitochondrion organization	2/27	452/18986	0.00442478	3.11144	1.71452	0.134602	0.258869	0.205913	ATAD3C/SLC25A33	2
GO:0016032	viral process	2/27	452/18986	0.00442478	3.11144	1.71452	0.134602	0.258869	0.205913	ISG15/TNFRSF14	2
GO:0016079	synaptic vesicle exocytosis	1/27	102/18986	0.00980392	6.89397	2.25237	0.135449	0.258869	0.205913	TPRG1L	1
GO:0043367	CD4-positive, alpha-beta T cell differentiation	1/27	102/18986	0.00980392	6.89397	2.25237	0.135449	0.258869	0.205913	PRKCZ	1
GO:0001960	negative regulation of cytokine-mediated signaling pathway	1/27	103/18986	0.00970874	6.82704	2.23775	0.136685	0.258869	0.205913	ISG15	1
GO:0033108	mitochondrial respiratory chain complex assembly	1/27	103/18986	0.00970874	6.82704	2.23775	0.136685	0.258869	0.205913	SLC25A33	1
GO:0034308	primary alcohol metabolic process	1/27	103/18986	0.00970874	6.82704	2.23775	0.136685	0.258869	0.205913	H6PD	1
GO:0042147	retrograde transport, endosome to Golgi	1/27	103/18986	0.00970874	6.82704	2.23775	0.136685	0.258869	0.205913	VAMP3	1
GO:0070167	regulation of biomineral tissue development	1/27	103/18986	0.00970874	6.82704	2.23775	0.136685	0.258869	0.205913	ISG15	1
GO:1990542	mitochondrial transmembrane transport	1/27	104/18986	0.00961538	6.7614	2.22331	0.13792	0.260619	0.207305	SLC25A33	1
GO:0010720	positive regulation of cell development	2/27	460/18986	0.00434783	3.05733	1.68566	0.138472	0.261075	0.207668	PRKCZ/CTNNBIP1	2
GO:0001823	mesonephros development	1/27	105/18986	0.00952381	6.697	2.20906	0.139152	0.261183	0.207754	CTNNBIP1	1
GO:0061326	renal tubule development	1/27	105/18986	0.00952381	6.697	2.20906	0.139152	0.261183	0.207754	CTNNBIP1	1
GO:0050829	defense response to Gram-negative bacterium	1/27	107/18986	0.00934579	6.57182	2.18112	0.141613	0.264528	0.210415	TNFRSF14	1
GO:0051099	positive regulation of binding	1/27	107/18986	0.00934579	6.57182	2.18112	0.141613	0.264528	0.210415	SKI	1
GO:0043161	proteasome-mediated ubiquitin-dependent protein catabolic process	2/27	467/18986	0.00428266	3.0115	1.66092	0.14188	0.264528	0.210415	KLHL21/UBE4B	2
GO:0002709	regulation of T cell mediated immunity	1/27	108/18986	0.00925926	6.51097	2.16741	0.14284	0.264924	0.210729	PRKCZ	1
GO:0060761	negative regulation of response to cytokine stimulus	1/27	108/18986	0.00925926	6.51097	2.16741	0.14284	0.264924	0.210729	ISG15	1
GO:0021549	cerebellum development	1/27	109/18986	0.00917431	6.45124	2.15388	0.144066	0.264924	0.210729	SDF4	1
GO:0048144	fibroblast proliferation	1/27	109/18986	0.00917431	6.45124	2.15388	0.144066	0.264924	0.210729	SKI	1
GO:0060079	excitatory postsynaptic potential	1/27	109/18986	0.00917431	6.45124	2.15388	0.144066	0.264924	0.210729	PRKCZ	1
GO:0002526	acute inflammatory response	1/27	110/18986	0.00909091	6.39259	2.14052	0.145291	0.264924	0.210729	CTNNBIP1	1
GO:0019218	regulation of steroid metabolic process	1/27	110/18986	0.00909091	6.39259	2.14052	0.145291	0.264924	0.210729	H6PD	1
GO:0060291	long-term synaptic potentiation	1/27	110/18986	0.00909091	6.39259	2.14052	0.145291	0.264924	0.210729	PRKCZ	1
GO:0072676	lymphocyte migration	1/27	110/18986	0.00909091	6.39259	2.14052	0.145291	0.264924	0.210729	TNFRSF14	1
GO:0016055	Wnt signaling pathway	2/27	476/18986	0.00420168	2.95456	1.62978	0.14629	0.264924	0.210729	SKI/CTNNBIP1	2
GO:0006892	post-Golgi vesicle-mediated transport	1/27	111/18986	0.00900901	6.335	2.12732	0.146513	0.264924	0.210729	VAMP3	1
GO:0007229	integrin-mediated signaling pathway	1/27	111/18986	0.00900901	6.335	2.12732	0.146513	0.264924	0.210729	ISG15	1
GO:0032963	collagen metabolic process	1/27	111/18986	0.00900901	6.335	2.12732	0.146513	0.264924	0.210729	MMP23B	1
GO:0035249	synaptic transmission, glutamatergic	1/27	111/18986	0.00900901	6.335	2.12732	0.146513	0.264924	0.210729	TPRG1L	1
GO:0014013	regulation of gliogenesis	1/27	112/18986	0.00892857	6.27844	2.11428	0.147734	0.265985	0.211573	SKI	1
GO:0140888	interferon-mediated signaling pathway	1/27	112/18986	0.00892857	6.27844	2.11428	0.147734	0.265985	0.211573	ISG15	1
GO:0036503	ERAD pathway	1/27	113/18986	0.00884956	6.22288	2.1014	0.148953	0.267034	0.212408	UBE4B	1
GO:0120034	positive regulation of plasma membrane bounded cell projection assembly	1/27	113/18986	0.00884956	6.22288	2.1014	0.148953	0.267034	0.212408	AGRN	1
GO:0090277	positive regulation of peptide hormone secretion	1/27	114/18986	0.00877193	6.16829	2.08867	0.150171	0.268071	0.213232	NADK	1
GO:0097250	mitochondrial respirasome assembly	1/27	114/18986	0.00877193	6.16829	2.08867	0.150171	0.268071	0.213232	SLC25A33	1
GO:0001838	embryonic epithelial tube formation	1/27	115/18986	0.00869565	6.11465	2.07609	0.151387	0.269096	0.214048	SKI	1
GO:0070252	actin-mediated cell contraction	1/27	115/18986	0.00869565	6.11465	2.07609	0.151387	0.269096	0.214048	RNF207	1
GO:0002793	positive regulation of peptide secretion	1/27	116/18986	0.00862069	6.06194	2.06367	0.152601	0.270681	0.215309	NADK	1
GO:0006091	generation of precursor metabolites and energy	2/27	490/18986	0.00408163	2.87014	1.58275	0.153208	0.271185	0.21571	H6PD/SLC25A33	2
GO:0023061	signal release	2/27	493/18986	0.0040568	2.85268	1.57289	0.1547	0.273246	0.217349	NADK/TPRG1L	2
GO:0001824	blastocyst development	1/27	118/18986	0.00847458	5.9592	2.03924	0.155024	0.273246	0.217349	SLC35E2B	1
GO:0022037	metencephalon development	1/27	119/18986	0.00840336	5.90912	2.02724	0.156233	0.273653	0.217673	SDF4	1
GO:0033209	tumor necrosis factor-mediated signaling pathway	1/27	119/18986	0.00840336	5.90912	2.02724	0.156233	0.273653	0.217673	TNFRSF14	1
GO:0099565	chemical synaptic transmission, postsynaptic	1/27	119/18986	0.00840336	5.90912	2.02724	0.156233	0.273653	0.217673	PRKCZ	1
GO:1903829	positive regulation of protein localization	2/27	497/18986	0.00402414	2.82972	1.55986	0.156693	0.273886	0.217858	NADK/PRKCZ	2
GO:0045785	positive regulation of cell adhesion	2/27	499/18986	0.00400802	2.81838	1.55339	0.157691	0.275058	0.218791	PRKCZ/TNFRSF14	2
GO:0009117	nucleotide metabolic process	2/27	500/18986	0.004	2.81274	1.55017	0.158191	0.275358	0.219029	NADK/H6PD	2
GO:0034341	response to type II interferon	1/27	121/18986	0.00826446	5.81145	2.00364	0.158647	0.275579	0.219204	VAMP3	1
GO:0045582	positive regulation of T cell differentiation	1/27	122/18986	0.00819672	5.76381	1.99204	0.159851	0.276525	0.219957	PRKCZ	1
GO:0051092	positive regulation of NF-kappaB transcription factor activity	1/27	122/18986	0.00819672	5.76381	1.99204	0.159851	0.276525	0.219957	PRKCZ	1
GO:0030326	embryonic limb morphogenesis	1/27	123/18986	0.00813008	5.71695	1.98056	0.161053	0.276689	0.220088	SKI	1
GO:0035113	embryonic appendage morphogenesis	1/27	123/18986	0.00813008	5.71695	1.98056	0.161053	0.276689	0.220088	SKI	1
GO:0072009	nephron epithelium development	1/27	123/18986	0.00813008	5.71695	1.98056	0.161053	0.276689	0.220088	CTNNBIP1	1
GO:0030510	regulation of BMP signaling pathway	1/27	124/18986	0.00806452	5.67085	1.96921	0.162254	0.276689	0.220088	SKI	1
GO:0031644	regulation of nervous system process	1/27	124/18986	0.00806452	5.67085	1.96921	0.162254	0.276689	0.220088	PRKCZ	1
GO:0032609	type II interferon production	1/27	124/18986	0.00806452	5.67085	1.96921	0.162254	0.276689	0.220088	ISG15	1
GO:0032649	regulation of type II interferon production	1/27	124/18986	0.00806452	5.67085	1.96921	0.162254	0.276689	0.220088	ISG15	1
GO:0001952	regulation of cell-matrix adhesion	1/27	125/18986	0.008	5.62548	1.95798	0.163453	0.277606	0.220817	PRKCZ	1
GO:0030278	regulation of ossification	1/27	125/18986	0.008	5.62548	1.95798	0.163453	0.277606	0.220817	ISG15	1
GO:0010811	positive regulation of cell-substrate adhesion	1/27	126/18986	0.00793651	5.58083	1.94688	0.164651	0.278175	0.221269	PRKCZ	1
GO:0002832	negative regulation of response to biotic stimulus	1/27	127/18986	0.00787402	5.53689	1.93589	0.165847	0.278175	0.221269	ISG15	1
GO:0006906	vesicle fusion	1/27	128/18986	0.0078125	5.49363	1.92502	0.167041	0.278175	0.221269	VAMP3	1
GO:0030282	bone mineralization	1/27	128/18986	0.0078125	5.49363	1.92502	0.167041	0.278175	0.221269	ISG15	1
GO:0032479	regulation of type I interferon production	1/27	128/18986	0.0078125	5.49363	1.92502	0.167041	0.278175	0.221269	ISG15	1
GO:0032606	type I interferon production	1/27	128/18986	0.0078125	5.49363	1.92502	0.167041	0.278175	0.221269	ISG15	1
GO:0072175	epithelial tube formation	1/27	128/18986	0.0078125	5.49363	1.92502	0.167041	0.278175	0.221269	SKI	1
GO:0007613	memory	1/27	129/18986	0.00775194	5.45105	1.91426	0.168234	0.278175	0.221269	PRKCZ	1
GO:0035710	CD4-positive, alpha-beta T cell activation	1/27	129/18986	0.00775194	5.45105	1.91426	0.168234	0.278175	0.221269	PRKCZ	1
GO:0045471	response to ethanol	1/27	129/18986	0.00775194	5.45105	1.91426	0.168234	0.278175	0.221269	SDF4	1
GO:0051209	release of sequestered calcium ion into cytosol	1/27	129/18986	0.00775194	5.45105	1.91426	0.168234	0.278175	0.221269	PLCH2	1
GO:0002761	regulation of myeloid leukocyte differentiation	1/27	130/18986	0.00769231	5.40912	1.90361	0.169425	0.278175	0.221269	CTNNBIP1	1
GO:0008286	insulin receptor signaling pathway	1/27	130/18986	0.00769231	5.40912	1.90361	0.169425	0.278175	0.221269	PRKCZ	1
GO:0019079	viral genome replication	1/27	130/18986	0.00769231	5.40912	1.90361	0.169425	0.278175	0.221269	ISG15	1
GO:0050830	defense response to Gram-positive bacterium	1/27	130/18986	0.00769231	5.40912	1.90361	0.169425	0.278175	0.221269	TNFRSF14	1
GO:0051283	negative regulation of sequestering of calcium ion	1/27	130/18986	0.00769231	5.40912	1.90361	0.169425	0.278175	0.221269	PLCH2	1
GO:0090174	organelle membrane fusion	1/27	130/18986	0.00769231	5.40912	1.90361	0.169425	0.278175	0.221269	VAMP3	1
GO:0030512	negative regulation of transforming growth factor beta receptor signaling pathway	1/27	132/18986	0.00757576	5.32716	1.88264	0.171801	0.280728	0.223301	SKI	1
GO:0051282	regulation of sequestering of calcium ion	1/27	132/18986	0.00757576	5.32716	1.88264	0.171801	0.280728	0.223301	PLCH2	1
GO:0002824	positive regulation of adaptive immune response based on somatic recombination of immune receptors built from immunoglobulin superfamily domains	1/27	133/18986	0.0075188	5.28711	1.87232	0.172988	0.280728	0.223301	PRKCZ	1
GO:0014902	myotube differentiation	1/27	133/18986	0.0075188	5.28711	1.87232	0.172988	0.280728	0.223301	SKI	1
GO:0046632	alpha-beta T cell differentiation	1/27	133/18986	0.0075188	5.28711	1.87232	0.172988	0.280728	0.223301	PRKCZ	1
GO:0070585	protein localization to mitochondrion	1/27	133/18986	0.0075188	5.28711	1.87232	0.172988	0.280728	0.223301	ISG15	1
GO:0050868	negative regulation of T cell activation	1/27	134/18986	0.00746269	5.24765	1.8621	0.174172	0.282105	0.224395	TNFRSF14	1
GO:0002286	T cell activation involved in immune response	1/27	136/18986	0.00735294	5.17048	1.84196	0.176536	0.2832	0.225267	PRKCZ	1
GO:0002708	positive regulation of lymphocyte mediated immunity	1/27	136/18986	0.00735294	5.17048	1.84196	0.176536	0.2832	0.225267	PRKCZ	1
GO:0021782	glial cell development	1/27	136/18986	0.00735294	5.17048	1.84196	0.176536	0.2832	0.225267	SKI	1
GO:0048593	camera-type eye morphogenesis	1/27	136/18986	0.00735294	5.17048	1.84196	0.176536	0.2832	0.225267	SKI	1
GO:0051208	sequestering of calcium ion	1/27	136/18986	0.00735294	5.17048	1.84196	0.176536	0.2832	0.225267	PLCH2	1
GO:0007368	determination of left/right symmetry	1/27	137/18986	0.00729927	5.13274	1.83203	0.177715	0.284006	0.225908	RNF207	1
GO:0045621	positive regulation of lymphocyte differentiation	1/27	137/18986	0.00729927	5.13274	1.83203	0.177715	0.284006	0.225908	PRKCZ	1
GO:0002456	T cell mediated immunity	1/27	138/18986	0.00724638	5.09554	1.82221	0.178893	0.284264	0.226113	PRKCZ	1
GO:0007200	phospholipase C-activating G protein-coupled receptor signaling pathway	1/27	138/18986	0.00724638	5.09554	1.82221	0.178893	0.284264	0.226113	PLCH2	1
GO:0050768	negative regulation of neurogenesis	1/27	138/18986	0.00724638	5.09554	1.82221	0.178893	0.284264	0.226113	SKI	1
GO:0002821	positive regulation of adaptive immune response	1/27	139/18986	0.00719424	5.05889	1.81248	0.180069	0.284516	0.226314	PRKCZ	1
GO:0030218	erythrocyte differentiation	1/27	139/18986	0.00719424	5.05889	1.81248	0.180069	0.284516	0.226314	ISG15	1
GO:0090288	negative regulation of cellular response to growth factor stimulus	1/27	139/18986	0.00719424	5.05889	1.81248	0.180069	0.284516	0.226314	SKI	1
GO:0030048	actin filament-based movement	1/27	140/18986	0.00714286	5.02275	1.80284	0.181244	0.285298	0.226935	RNF207	1
GO:0043547	positive regulation of GTPase activity	1/27	140/18986	0.00714286	5.02275	1.80284	0.181244	0.285298	0.226935	AGRN	1
GO:0035148	tube formation	1/27	142/18986	0.00704225	4.95201	1.78384	0.183588	0.288447	0.22944	SKI	1
GO:0007098	centrosome cycle	1/27	143/18986	0.00699301	4.91738	1.77447	0.184758	0.289202	0.230041	CCNL2	1
GO:0016331	morphogenesis of embryonic epithelium	1/27	143/18986	0.00699301	4.91738	1.77447	0.184758	0.289202	0.230041	SKI	1
GO:0060972	left/right pattern formation	1/27	144/18986	0.00694444	4.88323	1.76519	0.185926	0.290057	0.230721	RNF207	1
GO:0007269	neurotransmitter secretion	1/27	146/18986	0.00684932	4.81634	1.74688	0.188258	0.290057	0.230721	TPRG1L	1
GO:0043467	regulation of generation of precursor metabolites and energy	1/27	146/18986	0.00684932	4.81634	1.74688	0.188258	0.290057	0.230721	SLC25A33	1
GO:0051961	negative regulation of nervous system development	1/27	146/18986	0.00684932	4.81634	1.74688	0.188258	0.290057	0.230721	SKI	1
GO:0099643	signal release from synapse	1/27	146/18986	0.00684932	4.81634	1.74688	0.188258	0.290057	0.230721	TPRG1L	1
GO:1903900	regulation of viral life cycle	1/27	146/18986	0.00684932	4.81634	1.74688	0.188258	0.290057	0.230721	ISG15	1
GO:0009799	specification of symmetry	1/27	147/18986	0.00680272	4.78357	1.73785	0.189421	0.290057	0.230721	RNF207	1
GO:0009855	determination of bilateral symmetry	1/27	147/18986	0.00680272	4.78357	1.73785	0.189421	0.290057	0.230721	RNF207	1
GO:0046887	positive regulation of hormone secretion	1/27	147/18986	0.00680272	4.78357	1.73785	0.189421	0.290057	0.230721	NADK	1
GO:0060048	cardiac muscle contraction	1/27	147/18986	0.00680272	4.78357	1.73785	0.189421	0.290057	0.230721	RNF207	1
GO:0071675	regulation of mononuclear cell migration	1/27	147/18986	0.00680272	4.78357	1.73785	0.189421	0.290057	0.230721	TNFRSF14	1
GO:0034614	cellular response to reactive oxygen species	1/27	148/18986	0.00675676	4.75125	1.7289	0.190583	0.290057	0.230721	PEX14	1
GO:0046165	alcohol biosynthetic process	1/27	148/18986	0.00675676	4.75125	1.7289	0.190583	0.290057	0.230721	H6PD	1
GO:0046488	phosphatidylinositol metabolic process	1/27	148/18986	0.00675676	4.75125	1.7289	0.190583	0.290057	0.230721	PLCH2	1
GO:0071333	cellular response to glucose stimulus	1/27	148/18986	0.00675676	4.75125	1.7289	0.190583	0.290057	0.230721	NADK	1
GO:0006119	oxidative phosphorylation	1/27	149/18986	0.00671141	4.71936	1.72003	0.191743	0.290057	0.230721	SLC25A33	1
GO:0090090	negative regulation of canonical Wnt signaling pathway	1/27	149/18986	0.00671141	4.71936	1.72003	0.191743	0.290057	0.230721	CTNNBIP1	1
GO:0034101	erythrocyte homeostasis	1/27	150/18986	0.00666667	4.6879	1.71124	0.192901	0.290057	0.230721	ISG15	1
GO:0050714	positive regulation of protein secretion	1/27	150/18986	0.00666667	4.6879	1.71124	0.192901	0.290057	0.230721	NADK	1
GO:0021915	neural tube development	1/27	151/18986	0.00662252	4.65686	1.70252	0.194058	0.290057	0.230721	SKI	1
GO:0035107	appendage morphogenesis	1/27	151/18986	0.00662252	4.65686	1.70252	0.194058	0.290057	0.230721	SKI	1
GO:0035108	limb morphogenesis	1/27	151/18986	0.00662252	4.65686	1.70252	0.194058	0.290057	0.230721	SKI	1
GO:0060078	regulation of postsynaptic membrane potential	1/27	151/18986	0.00662252	4.65686	1.70252	0.194058	0.290057	0.230721	PRKCZ	1
GO:0071331	cellular response to hexose stimulus	1/27	151/18986	0.00662252	4.65686	1.70252	0.194058	0.290057	0.230721	NADK	1
GO:0002687	positive regulation of leukocyte migration	1/27	152/18986	0.00657895	4.62622	1.69389	0.195214	0.290057	0.230721	TNFRSF14	1
GO:0030177	positive regulation of Wnt signaling pathway	1/27	152/18986	0.00657895	4.62622	1.69389	0.195214	0.290057	0.230721	SKI	1
GO:0010565	regulation of cellular ketone metabolic process	1/27	153/18986	0.00653595	4.59598	1.68532	0.196367	0.290057	0.230721	H6PD	1
GO:0071326	cellular response to monosaccharide stimulus	1/27	153/18986	0.00653595	4.59598	1.68532	0.196367	0.290057	0.230721	NADK	1
GO:0072073	kidney epithelium development	1/27	153/18986	0.00653595	4.59598	1.68532	0.196367	0.290057	0.230721	CTNNBIP1	1
GO:1903038	negative regulation of leukocyte cell-cell adhesion	1/27	153/18986	0.00653595	4.59598	1.68532	0.196367	0.290057	0.230721	TNFRSF14	1
GO:1904375	regulation of protein localization to cell periphery	1/27	153/18986	0.00653595	4.59598	1.68532	0.196367	0.290057	0.230721	PRKCZ	1
GO:2000377	regulation of reactive oxygen species metabolic process	1/27	153/18986	0.00653595	4.59598	1.68532	0.196367	0.290057	0.230721	SLC25A33	1
GO:1903531	negative regulation of secretion by cell	1/27	154/18986	0.00649351	4.56614	1.67683	0.19752	0.291246	0.231667	VAMP3	1
GO:0031023	microtubule organizing center organization	1/27	156/18986	0.00641026	4.5076	1.66007	0.199819	0.29412	0.233953	CCNL2	1
GO:0002705	positive regulation of leukocyte mediated immunity	1/27	158/18986	0.00632911	4.45054	1.64359	0.202112	0.295937	0.235398	PRKCZ	1
GO:0042552	myelination	1/27	158/18986	0.00632911	4.45054	1.64359	0.202112	0.295937	0.235398	SKI	1
GO:0048754	branching morphogenesis of an epithelial tube	1/27	158/18986	0.00632911	4.45054	1.64359	0.202112	0.295937	0.235398	CTNNBIP1	1
GO:0018105	peptidyl-serine phosphorylation	1/27	159/18986	0.00628931	4.42255	1.63545	0.203256	0.296578	0.235908	PRKCZ	1
GO:0046718	symbiont entry into host cell	1/27	159/18986	0.00628931	4.42255	1.63545	0.203256	0.296578	0.235908	TNFRSF14	1
GO:0007272	ensheathment of neurons	1/27	160/18986	0.00625	4.39491	1.62738	0.204399	0.296697	0.236003	SKI	1
GO:0008366	axon ensheathment	1/27	160/18986	0.00625	4.39491	1.62738	0.204399	0.296697	0.236003	SKI	1
GO:0072006	nephron development	1/27	160/18986	0.00625	4.39491	1.62738	0.204399	0.296697	0.236003	CTNNBIP1	1
GO:0030902	hindbrain development	1/27	162/18986	0.00617284	4.34065	1.61143	0.20668	0.298973	0.237813	SDF4	1
GO:0050730	regulation of peptidyl-tyrosine phosphorylation	1/27	162/18986	0.00617284	4.34065	1.61143	0.20668	0.298973	0.237813	PRKCZ	1
GO:0071322	cellular response to carbohydrate stimulus	1/27	163/18986	0.00613497	4.31402	1.60356	0.207817	0.299586	0.2383	NADK	1
GO:0120254	olefinic compound metabolic process	1/27	163/18986	0.00613497	4.31402	1.60356	0.207817	0.299586	0.2383	H6PD	1
GO:0030010	establishment of cell polarity	1/27	164/18986	0.00609756	4.28771	1.59574	0.208954	0.299679	0.238375	PRKCZ	1
GO:0044409	symbiont entry into host	1/27	164/18986	0.00609756	4.28771	1.59574	0.208954	0.299679	0.238375	TNFRSF14	1
GO:0051017	actin filament bundle assembly	1/27	164/18986	0.00609756	4.28771	1.59574	0.208954	0.299679	0.238375	ESPN	1
GO:0030307	positive regulation of cell growth	1/27	166/18986	0.0060241	4.23606	1.5803	0.211222	0.302415	0.240551	SLC25A33	1
GO:0006367	transcription initiation at RNA polymerase II promoter	1/27	167/18986	0.00598802	4.21069	1.57267	0.212353	0.303001	0.241017	CTNNBIP1	1
GO:0048592	eye morphogenesis	1/27	167/18986	0.00598802	4.21069	1.57267	0.212353	0.303001	0.241017	SKI	1
GO:0007156	homophilic cell adhesion via plasma membrane adhesion molecules	1/27	168/18986	0.00595238	4.18563	1.5651	0.213483	0.30313	0.24112	CLSTN1	1
GO:0061572	actin filament bundle organization	1/27	168/18986	0.00595238	4.18563	1.5651	0.213483	0.30313	0.24112	ESPN	1
GO:0007605	sensory perception of sound	1/27	169/18986	0.00591716	4.16086	1.55759	0.214612	0.30313	0.24112	ESPN	1
GO:0051250	negative regulation of lymphocyte activation	1/27	169/18986	0.00591716	4.16086	1.55759	0.214612	0.30313	0.24112	TNFRSF14	1
GO:0140053	mitochondrial gene expression	1/27	169/18986	0.00591716	4.16086	1.55759	0.214612	0.30313	0.24112	SLC25A33	1
GO:1990138	neuron projection extension	1/27	169/18986	0.00591716	4.16086	1.55759	0.214612	0.30313	0.24112	PRKCZ	1
GO:0001678	intracellular glucose homeostasis	1/27	170/18986	0.00588235	4.13638	1.55013	0.215739	0.30421	0.241979	NADK	1
GO:0018209	peptidyl-serine modification	1/27	171/18986	0.00584795	4.11219	1.54274	0.216864	0.304772	0.242426	PRKCZ	1
GO:0048639	positive regulation of developmental growth	1/27	171/18986	0.00584795	4.11219	1.54274	0.216864	0.304772	0.242426	AGRN	1
GO:0030509	BMP signaling pathway	1/27	172/18986	0.00581395	4.08829	1.5354	0.217988	0.305329	0.242869	SKI	1
GO:0048284	organelle fusion	1/27	172/18986	0.00581395	4.08829	1.5354	0.217988	0.305329	0.242869	VAMP3	1
GO:0015748	organophosphate ester transport	1/27	173/18986	0.00578035	4.06465	1.52811	0.21911	0.305371	0.242902	SLC25A33	1
GO:0050792	regulation of viral process	1/27	173/18986	0.00578035	4.06465	1.52811	0.21911	0.305371	0.242902	ISG15	1
GO:0050796	regulation of insulin secretion	1/27	173/18986	0.00578035	4.06465	1.52811	0.21911	0.305371	0.242902	NADK	1
GO:0006937	regulation of muscle contraction	1/27	174/18986	0.00574713	4.04129	1.52088	0.220231	0.305411	0.242934	RNF207	1
GO:0048660	regulation of smooth muscle cell proliferation	1/27	174/18986	0.00574713	4.04129	1.52088	0.220231	0.305411	0.242934	CTNNBIP1	1
GO:0060041	retina development in camera-type eye	1/27	174/18986	0.00574713	4.04129	1.52088	0.220231	0.305411	0.242934	SKI	1
GO:0051048	negative regulation of secretion	1/27	175/18986	0.00571429	4.0182	1.5137	0.22135	0.306457	0.243766	VAMP3	1
GO:0001508	action potential	1/27	177/18986	0.00564972	3.9728	1.49951	0.223584	0.308531	0.245416	RNF207	1
GO:0055002	striated muscle cell development	1/27	177/18986	0.00564972	3.9728	1.49951	0.223584	0.308531	0.245416	SKI	1
GO:0007519	skeletal muscle tissue development	1/27	178/18986	0.00561798	3.95048	1.49249	0.224698	0.309052	0.24583	SKI	1
GO:0048659	smooth muscle cell proliferation	1/27	178/18986	0.00561798	3.95048	1.49249	0.224698	0.309052	0.24583	CTNNBIP1	1
GO:0017015	regulation of transforming growth factor beta receptor signaling pathway	1/27	180/18986	0.00555556	3.90658	1.4786	0.226923	0.311601	0.247858	SKI	1
GO:0030178	negative regulation of Wnt signaling pathway	1/27	181/18986	0.00552486	3.885	1.47173	0.228033	0.312103	0.248257	CTNNBIP1	1
GO:0035265	organ growth	1/27	181/18986	0.00552486	3.885	1.47173	0.228033	0.312103	0.248257	SKI	1
GO:0031214	biomineral tissue development	1/27	182/18986	0.00549451	3.86365	1.46491	0.229141	0.312601	0.248653	ISG15	1
GO:0042129	regulation of T cell proliferation	1/27	182/18986	0.00549451	3.86365	1.46491	0.229141	0.312601	0.248653	TNFRSF14	1
GO:0002262	myeloid cell homeostasis	1/27	183/18986	0.00546448	3.84254	1.45814	0.230248	0.313092	0.249044	ISG15	1
GO:1903844	regulation of cellular response to transforming growth factor beta stimulus	1/27	183/18986	0.00546448	3.84254	1.45814	0.230248	0.313092	0.249044	SKI	1
GO:0071772	response to BMP	1/27	184/18986	0.00543478	3.82166	1.45141	0.231353	0.313579	0.249431	SKI	1
GO:0071773	cellular response to BMP stimulus	1/27	184/18986	0.00543478	3.82166	1.45141	0.231353	0.313579	0.249431	SKI	1
GO:0019827	stem cell population maintenance	1/27	186/18986	0.00537634	3.78057	1.4381	0.233559	0.316058	0.251403	SKI	1
GO:0001959	regulation of cytokine-mediated signaling pathway	1/27	187/18986	0.00534759	3.76035	1.43152	0.23466	0.317037	0.252181	ISG15	1
GO:0006839	mitochondrial transport	1/27	188/18986	0.00531915	3.74035	1.42498	0.235759	0.317397	0.252468	SLC25A33	1
GO:0048736	appendage development	1/27	189/18986	0.00529101	3.72056	1.41848	0.236857	0.317397	0.252468	SKI	1
GO:0060173	limb development	1/27	189/18986	0.00529101	3.72056	1.41848	0.236857	0.317397	0.252468	SKI	1
GO:0097553	calcium ion transmembrane import into cytosol	1/27	189/18986	0.00529101	3.72056	1.41848	0.236857	0.317397	0.252468	PLCH2	1
GO:0043484	regulation of RNA splicing	1/27	190/18986	0.00526316	3.70097	1.41203	0.237953	0.317397	0.252468	CCNL2	1
GO:0051302	regulation of cell division	1/27	190/18986	0.00526316	3.70097	1.41203	0.237953	0.317397	0.252468	KLHL21	1
GO:0061138	morphogenesis of a branching epithelium	1/27	190/18986	0.00526316	3.70097	1.41203	0.237953	0.317397	0.252468	CTNNBIP1	1
GO:0098727	maintenance of cell number	1/27	190/18986	0.00526316	3.70097	1.41203	0.237953	0.317397	0.252468	SKI	1
GO:0006694	steroid biosynthetic process	1/27	191/18986	0.0052356	3.6816	1.40562	0.239048	0.317789	0.25278	H6PD	1
GO:0045580	regulation of T cell differentiation	1/27	191/18986	0.0052356	3.6816	1.40562	0.239048	0.317789	0.25278	PRKCZ	1
GO:0000910	cytokinesis	1/27	192/18986	0.00520833	3.66242	1.39926	0.240141	0.317789	0.25278	KLHL21	1
GO:0060538	skeletal muscle organ development	1/27	192/18986	0.00520833	3.66242	1.39926	0.240141	0.317789	0.25278	SKI	1
GO:0061025	membrane fusion	1/27	192/18986	0.00520833	3.66242	1.39926	0.240141	0.317789	0.25278	VAMP3	1
GO:0043087	regulation of GTPase activity	1/27	193/18986	0.00518135	3.64345	1.39293	0.241233	0.318731	0.253529	AGRN	1
GO:0006941	striated muscle contraction	1/27	194/18986	0.00515464	3.62467	1.38665	0.242323	0.319166	0.253875	RNF207	1
GO:1905475	regulation of protein localization to membrane	1/27	194/18986	0.00515464	3.62467	1.38665	0.242323	0.319166	0.253875	PRKCZ	1
GO:0002695	negative regulation of leukocyte activation	1/27	196/18986	0.00510204	3.58768	1.37421	0.244498	0.320443	0.254891	TNFRSF14	1
GO:0046890	regulation of lipid biosynthetic process	1/27	196/18986	0.00510204	3.58768	1.37421	0.244498	0.320443	0.254891	H6PD	1
GO:0050954	sensory perception of mechanical stimulus	1/27	196/18986	0.00510204	3.58768	1.37421	0.244498	0.320443	0.254891	ESPN	1
GO:0006006	glucose metabolic process	1/27	197/18986	0.00507614	3.56947	1.36806	0.245584	0.320443	0.254891	H6PD	1
GO:0006164	purine nucleotide biosynthetic process	1/27	197/18986	0.00507614	3.56947	1.36806	0.245584	0.320443	0.254891	NADK	1
GO:0070374	positive regulation of ERK1 and ERK2 cascade	1/27	197/18986	0.00507614	3.56947	1.36806	0.245584	0.320443	0.254891	PRKCZ	1
GO:0002706	regulation of lymphocyte mediated immunity	1/27	198/18986	0.00505051	3.55144	1.36194	0.246668	0.321358	0.255619	PRKCZ	1
GO:0060759	regulation of response to cytokine stimulus	1/27	199/18986	0.00502513	3.53359	1.35586	0.247751	0.322176	0.256269	ISG15	1
GO:0000302	response to reactive oxygen species	1/27	200/18986	0.005	3.51593	1.34982	0.248832	0.322176	0.256269	PEX14	1
GO:0009060	aerobic respiration	1/27	200/18986	0.005	3.51593	1.34982	0.248832	0.322176	0.256269	SLC25A33	1
GO:0031334	positive regulation of protein-containing complex assembly	1/27	200/18986	0.005	3.51593	1.34982	0.248832	0.322176	0.256269	ISG15	1
GO:0018108	peptidyl-tyrosine phosphorylation	1/27	204/18986	0.00490196	3.44699	1.32604	0.253141	0.323922	0.257658	PRKCZ	1
GO:0051701	biological process involved in interaction with host	1/27	204/18986	0.00490196	3.44699	1.32604	0.253141	0.323922	0.257658	TNFRSF14	1
GO:0090276	regulation of peptide hormone secretion	1/27	204/18986	0.00490196	3.44699	1.32604	0.253141	0.323922	0.257658	NADK	1
GO:0031396	regulation of protein ubiquitination	1/27	205/18986	0.00487805	3.43017	1.32018	0.254215	0.323922	0.257658	ISG15	1
GO:0055001	muscle cell development	1/27	205/18986	0.00487805	3.43017	1.32018	0.254215	0.323922	0.257658	SKI	1
GO:0090101	negative regulation of transmembrane receptor protein serine/threonine kinase signaling pathway	1/27	205/18986	0.00487805	3.43017	1.32018	0.254215	0.323922	0.257658	SKI	1
GO:0120032	regulation of plasma membrane bounded cell projection assembly	1/27	205/18986	0.00487805	3.43017	1.32018	0.254215	0.323922	0.257658	AGRN	1
GO:0002822	regulation of adaptive immune response based on somatic recombination of immune receptors built from immunoglobulin superfamily domains	1/27	206/18986	0.00485437	3.41352	1.31437	0.255287	0.323922	0.257658	PRKCZ	1
GO:0009749	response to glucose	1/27	206/18986	0.00485437	3.41352	1.31437	0.255287	0.323922	0.257658	NADK	1
GO:0018212	peptidyl-tyrosine modification	1/27	206/18986	0.00485437	3.41352	1.31437	0.255287	0.323922	0.257658	PRKCZ	1
GO:0030073	insulin secretion	1/27	206/18986	0.00485437	3.41352	1.31437	0.255287	0.323922	0.257658	NADK	1
GO:0001763	morphogenesis of a branching structure	1/27	207/18986	0.00483092	3.39703	1.30858	0.256358	0.323922	0.257658	CTNNBIP1	1
GO:0002791	regulation of peptide secretion	1/27	207/18986	0.00483092	3.39703	1.30858	0.256358	0.323922	0.257658	NADK	1
GO:0022408	negative regulation of cell-cell adhesion	1/27	207/18986	0.00483092	3.39703	1.30858	0.256358	0.323922	0.257658	TNFRSF14	1
GO:0060491	regulation of cell projection assembly	1/27	207/18986	0.00483092	3.39703	1.30858	0.256358	0.323922	0.257658	AGRN	1
GO:0090087	regulation of peptide transport	1/27	207/18986	0.00483092	3.39703	1.30858	0.256358	0.323922	0.257658	NADK	1
GO:0051091	positive regulation of DNA-binding transcription factor activity	1/27	208/18986	0.00480769	3.3807	1.30284	0.257427	0.324784	0.258344	PRKCZ	1
GO:0006352	DNA-templated transcription initiation	1/27	209/18986	0.00478469	3.36452	1.29713	0.258495	0.325153	0.258637	CTNNBIP1	1
GO:0006836	neurotransmitter transport	1/27	209/18986	0.00478469	3.36452	1.29713	0.258495	0.325153	0.258637	TPRG1L	1
GO:0048469	cell maturation	1/27	210/18986	0.0047619	3.3485	1.29145	0.259561	0.326005	0.259316	AGRN	1
GO:0009746	response to hexose	1/27	211/18986	0.00473934	3.33263	1.28581	0.260626	0.326853	0.25999	NADK	1
GO:0008016	regulation of heart contraction	1/27	213/18986	0.00469484	3.30134	1.27463	0.262751	0.329027	0.261719	RNF207	1
GO:0042098	T cell proliferation	1/27	215/18986	0.00465116	3.27063	1.26358	0.26487	0.331186	0.263436	TNFRSF14	1
GO:0060348	bone development	1/27	217/18986	0.00460829	3.24048	1.25265	0.266983	0.333332	0.265143	SKI	1
GO:0034284	response to monosaccharide	1/27	218/18986	0.00458716	3.22562	1.24724	0.268038	0.334151	0.265795	NADK	1
GO:0050866	negative regulation of cell activation	1/27	219/18986	0.00456621	3.21089	1.24186	0.269091	0.334966	0.266443	TNFRSF14	1
GO:0048167	regulation of synaptic plasticity	1/27	220/18986	0.00454545	3.1963	1.23651	0.270142	0.335777	0.267088	PRKCZ	1
GO:0071356	cellular response to tumor necrosis factor	1/27	221/18986	0.00452489	3.18183	1.23118	0.271192	0.336584	0.26773	TNFRSF14	1
GO:0099504	synaptic vesicle cycle	1/27	222/18986	0.0045045	3.1675	1.22589	0.272241	0.337386	0.268368	TPRG1L	1
GO:0010810	regulation of cell-substrate adhesion	1/27	223/18986	0.0044843	3.1533	1.22063	0.273288	0.337686	0.268607	PRKCZ	1
GO:0045619	regulation of lymphocyte differentiation	1/27	223/18986	0.0044843	3.1533	1.22063	0.273288	0.337686	0.268607	PRKCZ	1
GO:0051651	maintenance of location in cell	1/27	224/18986	0.00446429	3.13922	1.2154	0.274334	0.33848	0.269238	PLCH2	1
GO:0060541	respiratory system development	1/27	225/18986	0.00444444	3.12527	1.2102	0.275378	0.339269	0.269866	SKI	1
GO:0002285	lymphocyte activation involved in immune response	1/27	227/18986	0.00440529	3.09773	1.19988	0.277463	0.340836	0.271112	PRKCZ	1
GO:0007163	establishment or maintenance of cell polarity	1/27	227/18986	0.00440529	3.09773	1.19988	0.277463	0.340836	0.271112	PRKCZ	1
GO:0046034	ATP metabolic process	1/27	228/18986	0.00438596	3.08415	1.19476	0.278503	0.341614	0.271731	NADK	1
GO:0071674	mononuclear cell migration	1/27	231/18986	0.004329	3.04409	1.17958	0.281614	0.344925	0.274365	TNFRSF14	1
GO:0048588	developmental cell growth	1/27	232/18986	0.00431034	3.03097	1.17457	0.282648	0.345184	0.274571	PRKCZ	1
GO:0048705	skeletal system morphogenesis	1/27	232/18986	0.00431034	3.03097	1.17457	0.282648	0.345184	0.274571	SKI	1
GO:0009165	nucleotide biosynthetic process	1/27	233/18986	0.00429185	3.01796	1.16959	0.283681	0.345942	0.275174	NADK	1
GO:0019722	calcium-mediated signaling	1/27	235/18986	0.00425532	2.99228	1.15971	0.285742	0.34795	0.276771	TPRG1L	1
GO:0001933	negative regulation of protein phosphorylation	1/27	236/18986	0.00423729	2.9796	1.15481	0.28677	0.348192	0.276963	PRKCZ	1
GO:0002685	regulation of leukocyte migration	1/27	236/18986	0.00423729	2.9796	1.15481	0.28677	0.348192	0.276963	TNFRSF14	1
GO:0042180	cellular ketone metabolic process	1/27	237/18986	0.00421941	2.96703	1.14994	0.287798	0.348934	0.277553	H6PD	1
GO:0019318	hexose metabolic process	1/27	238/18986	0.00420168	2.95456	1.14509	0.288823	0.349168	0.27774	H6PD	1
GO:0060560	developmental growth involved in morphogenesis	1/27	238/18986	0.00420168	2.95456	1.14509	0.288823	0.349168	0.27774	PRKCZ	1
GO:0015931	nucleobase-containing compound transport	1/27	239/18986	0.0041841	2.9422	1.14027	0.289847	0.349902	0.278324	SLC25A33	1
GO:0050670	regulation of lymphocyte proliferation	1/27	240/18986	0.00416667	2.92994	1.13547	0.29087	0.350632	0.278904	TNFRSF14	1
GO:0007160	cell-matrix adhesion	1/27	241/18986	0.00414938	2.91778	1.13069	0.291891	0.350855	0.279082	PRKCZ	1
GO:0042445	hormone metabolic process	1/27	241/18986	0.00414938	2.91778	1.13069	0.291891	0.350855	0.279082	H6PD	1
GO:0072593	reactive oxygen species metabolic process	1/27	242/18986	0.00413223	2.90572	1.12594	0.292911	0.351578	0.279656	SLC25A33	1
GO:0009743	response to carbohydrate	1/27	243/18986	0.00411523	2.89377	1.12122	0.29393	0.351793	0.279828	NADK	1
GO:0034612	response to tumor necrosis factor	1/27	243/18986	0.00411523	2.89377	1.12122	0.29393	0.351793	0.279828	TNFRSF14	1
GO:0032944	regulation of mononuclear cell proliferation	1/27	245/18986	0.00408163	2.87014	1.11184	0.295963	0.353722	0.281362	TNFRSF14	1
GO:0002573	myeloid leukocyte differentiation	1/27	247/18986	0.00404858	2.8469	1.10255	0.29799	0.355638	0.282886	CTNNBIP1	1
GO:1903320	regulation of protein modification by small protein conjugation or removal	1/27	248/18986	0.00403226	2.83542	1.09794	0.299001	0.356338	0.283443	ISG15	1
GO:0045333	cellular respiration	1/27	249/18986	0.00401606	2.82404	1.09336	0.300012	0.357035	0.283998	SLC25A33	1
GO:0007179	transforming growth factor beta receptor signaling pathway	1/27	250/18986	0.004	2.81274	1.0888	0.30102	0.357222	0.284146	SKI	1
GO:0030072	peptide hormone secretion	1/27	250/18986	0.004	2.81274	1.0888	0.30102	0.357222	0.284146	NADK	1
GO:0034599	cellular response to oxidative stress	1/27	251/18986	0.00398406	2.80153	1.08426	0.302028	0.357406	0.284293	PEX14	1
GO:0045444	fat cell differentiation	1/27	251/18986	0.00398406	2.80153	1.08426	0.302028	0.357406	0.284293	SDF4	1
GO:0009205	purine ribonucleoside triphosphate metabolic process	1/27	252/18986	0.00396825	2.79042	1.07974	0.303033	0.357588	0.284437	NADK	1
GO:0048738	cardiac muscle tissue development	1/27	252/18986	0.00396825	2.79042	1.07974	0.303033	0.357588	0.284437	SKI	1
GO:0060047	heart contraction	1/27	253/18986	0.00395257	2.77939	1.07524	0.304038	0.357767	0.28458	RNF207	1
GO:1901873	regulation of post-translational protein modification	1/27	253/18986	0.00395257	2.77939	1.07524	0.304038	0.357767	0.28458	ISG15	1
GO:0090257	regulation of muscle system process	1/27	254/18986	0.00393701	2.76845	1.07077	0.305041	0.358445	0.285119	RNF207	1
GO:1901617	organic hydroxy compound biosynthetic process	1/27	255/18986	0.00392157	2.75759	1.06632	0.306043	0.359119	0.285655	H6PD	1
GO:0042326	negative regulation of phosphorylation	1/27	256/18986	0.00390625	2.74682	1.06189	0.307043	0.359789	0.286188	PRKCZ	1
GO:0002790	peptide secretion	1/27	257/18986	0.00389105	2.73613	1.05748	0.308042	0.360117	0.286449	NADK	1
GO:0002703	regulation of leukocyte mediated immunity	1/27	258/18986	0.00387597	2.72552	1.05309	0.309039	0.360117	0.286449	PRKCZ	1
GO:0009199	ribonucleoside triphosphate metabolic process	1/27	258/18986	0.00387597	2.72552	1.05309	0.309039	0.360117	0.286449	NADK	1
GO:0032984	protein-containing complex disassembly	1/27	258/18986	0.00387597	2.72552	1.05309	0.309039	0.360117	0.286449	PEX14	1
GO:0009144	purine nucleoside triphosphate metabolic process	1/27	259/18986	0.003861	2.715	1.04872	0.310036	0.360777	0.286974	NADK	1
GO:0046883	regulation of hormone secretion	1/27	261/18986	0.00383142	2.6942	1.04005	0.312024	0.362587	0.288414	NADK	1
GO:0003015	heart process	1/27	262/18986	0.00381679	2.68391	1.03574	0.313016	0.362735	0.288532	RNF207	1
GO:0005996	monosaccharide metabolic process	1/27	262/18986	0.00381679	2.68391	1.03574	0.313016	0.362735	0.288532	H6PD	1
GO:0000209	protein polyubiquitination	1/27	263/18986	0.00380228	2.67371	1.03145	0.314006	0.362881	0.288647	UBE4B	1
GO:0072522	purine-containing compound biosynthetic process	1/27	263/18986	0.00380228	2.67371	1.03145	0.314006	0.362881	0.288647	NADK	1
GO:0042593	glucose homeostasis	1/27	265/18986	0.00377358	2.65353	1.02294	0.315984	0.364663	0.290065	NADK	1
GO:0033500	carbohydrate homeostasis	1/27	266/18986	0.0037594	2.64355	1.01871	0.31697	0.365299	0.290571	NADK	1
GO:0010001	glial cell differentiation	1/27	267/18986	0.00374532	2.63365	1.0145	0.317955	0.365431	0.290676	SKI	1
GO:1903522	regulation of blood circulation	1/27	267/18986	0.00374532	2.63365	1.0145	0.317955	0.365431	0.290676	RNF207	1
GO:0032886	regulation of microtubule-based process	1/27	269/18986	0.00371747	2.61407	1.00614	0.319921	0.367187	0.292073	CCNL2	1
GO:0015833	peptide transport	1/27	270/18986	0.0037037	2.60439	1.00199	0.320902	0.367308	0.292169	NADK	1
GO:0070663	regulation of leukocyte proliferation	1/27	270/18986	0.0037037	2.60439	1.00199	0.320902	0.367308	0.292169	TNFRSF14	1
GO:0050708	regulation of protein secretion	1/27	272/18986	0.00367647	2.58524	0.993746	0.32286	0.369046	0.293552	NADK	1
GO:0003007	heart morphogenesis	1/27	274/18986	0.00364964	2.56637	0.985573	0.324813	0.370269	0.294524	RNF207	1
GO:0009141	nucleoside triphosphate metabolic process	1/27	274/18986	0.00364964	2.56637	0.985573	0.324813	0.370269	0.294524	NADK	1
GO:0051259	protein complex oligomerization	1/27	275/18986	0.00363636	2.55704	0.981513	0.325787	0.370475	0.294688	ISG15	1
GO:0003018	vascular process in circulatory system	1/27	276/18986	0.00362319	2.54777	0.977472	0.32676	0.370475	0.294688	CTNNBIP1	1
GO:0060828	regulation of canonical Wnt signaling pathway	1/27	276/18986	0.00362319	2.54777	0.977472	0.32676	0.370475	0.294688	CTNNBIP1	1
GO:0071695	anatomical structure maturation	1/27	276/18986	0.00362319	2.54777	0.977472	0.32676	0.370475	0.294688	AGRN	1
GO:0034976	response to endoplasmic reticulum stress	1/27	277/18986	0.00361011	2.53857	0.973448	0.327732	0.371075	0.295166	UBE4B	1
GO:0098742	cell-cell adhesion via plasma-membrane adhesion molecules	1/27	280/18986	0.00357143	2.51138	0.96148	0.330638	0.373862	0.297382	CLSTN1	1
GO:0010721	negative regulation of cell development	1/27	281/18986	0.00355872	2.50244	0.957526	0.331604	0.373946	0.297449	SKI	1
GO:0021537	telencephalon development	1/27	281/18986	0.00355872	2.50244	0.957526	0.331604	0.373946	0.297449	SKI	1
GO:0007611	learning or memory	1/27	282/18986	0.0035461	2.49356	0.953588	0.332569	0.374531	0.297914	PRKCZ	1
GO:0090596	sensory organ morphogenesis	1/27	285/18986	0.00350877	2.46732	0.941875	0.335455	0.377275	0.300097	SKI	1
GO:0006650	glycerophospholipid metabolic process	1/27	294/18986	0.00340136	2.39179	0.907607	0.344043	0.385898	0.306956	PLCH2	1
GO:0016197	endosomal transport	1/27	294/18986	0.00340136	2.39179	0.907607	0.344043	0.385898	0.306956	VAMP3	1
GO:0070372	regulation of ERK1 and ERK2 cascade	1/27	296/18986	0.00337838	2.37563	0.900163	0.345936	0.387504	0.308234	PRKCZ	1
GO:0031348	negative regulation of defense response	1/27	297/18986	0.003367	2.36763	0.896463	0.346881	0.387528	0.308252	ISG15	1
GO:0046651	lymphocyte proliferation	1/27	297/18986	0.003367	2.36763	0.896463	0.346881	0.387528	0.308252	TNFRSF14	1
GO:1903532	positive regulation of secretion by cell	1/27	298/18986	0.0033557	2.35968	0.892778	0.347825	0.388065	0.30868	NADK	1
GO:0048562	embryonic organ morphogenesis	1/27	300/18986	0.00333333	2.34395	0.885452	0.349708	0.389648	0.309939	RNF207	1
GO:0006874	intracellular calcium ion homeostasis	1/27	304/18986	0.00328947	2.31311	0.870974	0.353459	0.393296	0.312841	PLCH2	1
GO:0032943	mononuclear cell proliferation	1/27	305/18986	0.00327869	2.30553	0.86739	0.354393	0.393296	0.312841	TNFRSF14	1
GO:0010563	negative regulation of phosphorus metabolic process	1/27	306/18986	0.00326797	2.29799	0.86382	0.355326	0.393296	0.312841	PRKCZ	1
GO:0045936	negative regulation of phosphate metabolic process	1/27	306/18986	0.00326797	2.29799	0.86382	0.355326	0.393296	0.312841	PRKCZ	1
GO:0071560	cellular response to transforming growth factor beta stimulus	1/27	306/18986	0.00326797	2.29799	0.86382	0.355326	0.393296	0.312841	SKI	1
GO:0048193	Golgi vesicle transport	1/27	308/18986	0.00324675	2.28307	0.856721	0.357189	0.394837	0.314066	VAMP3	1
GO:0071559	response to transforming growth factor beta	1/27	313/18986	0.00319489	2.2466	0.839211	0.361822	0.3994	0.317696	SKI	1
GO:0007162	negative regulation of cell adhesion	1/27	314/18986	0.00318471	2.23944	0.835748	0.362744	0.3994	0.317696	TNFRSF14	1
GO:0051146	striated muscle cell differentiation	1/27	314/18986	0.00318471	2.23944	0.835748	0.362744	0.3994	0.317696	SKI	1
GO:0002366	leukocyte activation involved in immune response	1/27	315/18986	0.0031746	2.23233	0.832299	0.363666	0.39989	0.318085	PRKCZ	1
GO:0002263	cell activation involved in immune response	1/27	319/18986	0.0031348	2.20434	0.81863	0.367339	0.401679	0.319508	PRKCZ	1
GO:0046879	hormone secretion	1/27	319/18986	0.0031348	2.20434	0.81863	0.367339	0.401679	0.319508	NADK	1
GO:0070371	ERK1 and ERK2 cascade	1/27	319/18986	0.0031348	2.20434	0.81863	0.367339	0.401679	0.319508	PRKCZ	1
GO:0030217	T cell differentiation	1/27	320/18986	0.003125	2.19745	0.815244	0.368254	0.401679	0.319508	PRKCZ	1
GO:0051607	defense response to virus	1/27	320/18986	0.003125	2.19745	0.815244	0.368254	0.401679	0.319508	ISG15	1
GO:0062197	cellular response to chemical stress	1/27	321/18986	0.00311526	2.19061	0.811871	0.369168	0.401679	0.319508	PEX14	1
GO:1901293	nucleoside phosphate biosynthetic process	1/27	321/18986	0.00311526	2.19061	0.811871	0.369168	0.401679	0.319508	NADK	1
GO:0001822	kidney development	1/27	322/18986	0.00310559	2.1838	0.80851	0.37008	0.401679	0.319508	CTNNBIP1	1
GO:0044403	biological process involved in symbiotic interaction	1/27	322/18986	0.00310559	2.1838	0.80851	0.37008	0.401679	0.319508	TNFRSF14	1
GO:0051047	positive regulation of secretion	1/27	322/18986	0.00310559	2.1838	0.80851	0.37008	0.401679	0.319508	NADK	1
GO:0048638	regulation of developmental growth	1/27	325/18986	0.00307692	2.16365	0.7985	0.37281	0.404119	0.32145	AGRN	1
GO:0090092	regulation of transmembrane receptor protein serine/threonine kinase signaling pathway	1/27	326/18986	0.00306748	2.15701	0.795187	0.373718	0.40458	0.321816	SKI	1
GO:0042886	amide transport	1/27	328/18986	0.00304878	2.14386	0.788598	0.375529	0.405947	0.322904	NADK	1
GO:0050890	cognition	1/27	329/18986	0.00303951	2.13734	0.785321	0.376433	0.405947	0.322904	PRKCZ	1
GO:0055074	calcium ion homeostasis	1/27	329/18986	0.00303951	2.13734	0.785321	0.376433	0.405947	0.322904	PLCH2	1
GO:0009914	hormone transport	1/27	330/18986	0.0030303	2.13086	0.782056	0.377335	0.406398	0.323263	NADK	1
GO:0051345	positive regulation of hydrolase activity	1/27	331/18986	0.00302115	2.12443	0.778802	0.378236	0.406771	0.323559	AGRN	1
GO:0060070	canonical Wnt signaling pathway	1/27	332/18986	0.00301205	2.11803	0.775559	0.379136	0.406771	0.323559	CTNNBIP1	1
GO:0072001	renal system development	1/27	332/18986	0.00301205	2.11803	0.775559	0.379136	0.406771	0.323559	CTNNBIP1	1
GO:0008202	steroid metabolic process	1/27	334/18986	0.00299401	2.10534	0.769109	0.380932	0.408176	0.324677	H6PD	1
GO:0030198	extracellular matrix organization	1/27	339/18986	0.00294985	2.07429	0.753178	0.3854	0.411912	0.327649	MMP23B	1
GO:0048872	homeostasis of number of cells	1/27	339/18986	0.00294985	2.07429	0.753178	0.3854	0.411912	0.327649	ISG15	1
GO:0043062	extracellular structure organization	1/27	340/18986	0.00294118	2.06819	0.750024	0.38629	0.412238	0.327907	MMP23B	1
GO:0045229	external encapsulating structure organization	1/27	341/18986	0.00293255	2.06213	0.746882	0.387179	0.412238	0.327907	MMP23B	1
GO:0070661	leukocyte proliferation	1/27	341/18986	0.00293255	2.06213	0.746882	0.387179	0.412238	0.327907	TNFRSF14	1
GO:0019216	regulation of lipid metabolic process	1/27	344/18986	0.00290698	2.04414	0.737518	0.389838	0.414542	0.329741	H6PD	1
GO:0051235	maintenance of location	1/27	345/18986	0.00289855	2.03822	0.734417	0.390721	0.414956	0.33007	PLCH2	1
GO:0009150	purine ribonucleotide metabolic process	1/27	348/18986	0.00287356	2.02065	0.725179	0.393365	0.416183	0.331046	NADK	1
GO:0062012	regulation of small molecule metabolic process	1/27	348/18986	0.00287356	2.02065	0.725179	0.393365	0.416183	0.331046	H6PD	1
GO:0070588	calcium ion transmembrane transport	1/27	348/18986	0.00287356	2.02065	0.725179	0.393365	0.416183	0.331046	PLCH2	1
GO:0016042	lipid catabolic process	1/27	351/18986	0.002849	2.00338	0.716032	0.395998	0.418441	0.332842	PLCH2	1
GO:0042063	gliogenesis	1/27	355/18986	0.0028169	1.9808	0.703975	0.399491	0.421601	0.335356	SKI	1
GO:0015980	energy derivation by oxidation of organic compounds	1/27	356/18986	0.00280899	1.97524	0.700986	0.400361	0.421989	0.335664	SLC25A33	1
GO:0006936	muscle contraction	1/27	358/18986	0.0027933	1.9642	0.695036	0.402098	0.423288	0.336697	RNF207	1
GO:0043010	camera-type eye development	1/27	362/18986	0.00276243	1.9425	0.683249	0.405557	0.426232	0.339039	SKI	1
GO:0006066	alcohol metabolic process	1/27	363/18986	0.00275482	1.93715	0.680325	0.406419	0.426232	0.339039	H6PD	1
GO:0031346	positive regulation of cell projection organization	1/27	363/18986	0.00275482	1.93715	0.680325	0.406419	0.426232	0.339039	AGRN	1
GO:0009259	ribonucleotide metabolic process	1/27	368/18986	0.00271739	1.91083	0.665846	0.41071	0.430194	0.342191	NADK	1
GO:0007517	muscle organ development	1/27	369/18986	0.00271003	1.90565	0.662977	0.411565	0.430552	0.342475	SKI	1
GO:0009306	protein secretion	1/27	371/18986	0.00269542	1.89538	0.657266	0.41327	0.431798	0.343466	NADK	1
GO:0006644	phospholipid metabolic process	1/27	374/18986	0.0026738	1.88017	0.648765	0.41582	0.433382	0.344727	PLCH2	1
GO:0035592	establishment of protein localization to extracellular region	1/27	374/18986	0.0026738	1.88017	0.648765	0.41582	0.433382	0.344727	NADK	1
GO:0019693	ribose phosphate metabolic process	1/27	376/18986	0.00265957	1.87017	0.643141	0.417514	0.434608	0.345701	NADK	1
GO:0090287	regulation of cellular response to growth factor stimulus	1/27	381/18986	0.00262467	1.84563	0.629228	0.421727	0.43845	0.348758	SKI	1
GO:0071692	protein localization to extracellular region	1/27	382/18986	0.0026178	1.8408	0.62647	0.422566	0.438779	0.349019	NADK	1
GO:0050767	regulation of neurogenesis	1/27	383/18986	0.00261097	1.83599	0.62372	0.423404	0.439105	0.349279	SKI	1
GO:0046486	glycerolipid metabolic process	1/27	385/18986	0.0025974	1.82646	0.618245	0.425077	0.440074	0.350049	PLCH2	1
GO:0002449	lymphocyte mediated immunity	1/27	386/18986	0.00259067	1.82172	0.61552	0.425911	0.440074	0.350049	PRKCZ	1
GO:0016050	vesicle organization	1/27	386/18986	0.00259067	1.82172	0.61552	0.425911	0.440074	0.350049	VAMP3	1
GO:0141091	transforming growth factor beta receptor superfamily signaling pathway	1/27	397/18986	0.00251889	1.77125	0.586058	0.435015	0.448926	0.357091	SKI	1
GO:0002460	adaptive immune response based on somatic recombination of immune receptors built from immunoglobulin superfamily domains	1/27	400/18986	0.0025	1.75796	0.578182	0.437473	0.450909	0.358668	PRKCZ	1
GO:0001701	in utero embryonic development	1/27	403/18986	0.00248139	1.74488	0.570372	0.439921	0.452876	0.360232	SLC35E2B	1
GO:0050900	leukocyte migration	1/27	404/18986	0.00247525	1.74056	0.567783	0.440735	0.453158	0.360457	TNFRSF14	1
GO:0006979	response to oxidative stress	1/27	405/18986	0.00246914	1.73626	0.565202	0.441548	0.453437	0.360679	PEX14	1
GO:0001654	eye development	1/27	411/18986	0.00243309	1.71091	0.54986	0.446399	0.45786	0.364197	SKI	1
GO:0150063	visual system development	1/27	415/18986	0.00240964	1.69442	0.539771	0.449611	0.460591	0.366369	SKI	1
GO:0030900	forebrain development	1/27	416/18986	0.00240385	1.69035	0.537265	0.450412	0.460848	0.366574	SKI	1
GO:0048880	sensory system development	1/27	422/18986	0.00236967	1.66632	0.522372	0.455189	0.465169	0.370011	SKI	1
GO:0014706	striated muscle tissue development	1/27	424/18986	0.00235849	1.65846	0.51746	0.456773	0.465893	0.370586	SKI	1
GO:0007178	cell surface receptor protein serine/threonine kinase signaling pathway	1/27	425/18986	0.00235294	1.65455	0.515013	0.457563	0.465893	0.370586	SKI	1
GO:0009615	response to virus	1/27	425/18986	0.00235294	1.65455	0.515013	0.457563	0.465893	0.370586	ISG15	1
GO:0030098	lymphocyte differentiation	1/27	426/18986	0.00234742	1.65067	0.512573	0.458352	0.46613	0.370776	PRKCZ	1
GO:0042692	muscle cell differentiation	1/27	432/18986	0.00231481	1.62774	0.498064	0.463063	0.470351	0.374133	SKI	1
GO:0032102	negative regulation of response to external stimulus	1/27	437/18986	0.00228833	1.60912	0.486141	0.466959	0.473735	0.376825	ISG15	1
GO:0006816	calcium ion transport	1/27	445/18986	0.00224719	1.58019	0.467374	0.473136	0.479422	0.381348	PLCH2	1
GO:0060537	muscle tissue development	1/27	447/18986	0.00223714	1.57312	0.462739	0.47467	0.480395	0.382122	SKI	1
GO:0022411	cellular component disassembly	1/27	450/18986	0.00222222	1.56263	0.455831	0.476962	0.482133	0.383505	PEX14	1
GO:0048568	embryonic organ development	1/27	458/18986	0.00218341	1.53534	0.43765	0.483027	0.487677	0.387914	RNF207	1
GO:0072594	establishment of protein localization to organelle	1/27	462/18986	0.0021645	1.52205	0.428688	0.486034	0.490123	0.38986	PEX14	1
GO:0003012	muscle system process	1/27	465/18986	0.00215054	1.51223	0.422022	0.488278	0.491205	0.390721	RNF207	1
GO:0007015	actin filament organization	1/27	465/18986	0.00215054	1.51223	0.422022	0.488278	0.491205	0.390721	ESPN	1
GO:0051051	negative regulation of transport	1/27	467/18986	0.00214133	1.50575	0.417604	0.489769	0.492115	0.391445	VAMP3	1
GO:0045088	regulation of innate immune response	1/27	470/18986	0.00212766	1.49614	0.411015	0.491998	0.493763	0.392756	ISG15	1
GO:0043410	positive regulation of MAPK cascade	1/27	472/18986	0.00211864	1.4898	0.406648	0.493478	0.494657	0.393467	PRKCZ	1
GO:0008380	RNA splicing	1/27	484/18986	0.00206612	1.45286	0.380854	0.502274	0.502874	0.400002	CCNL2	1
GO:0002443	leukocyte mediated immunity	1/27	485/18986	0.00206186	1.44987	0.378736	0.503001	0.503001	0.400103	PRKCZ	1
Table S20: Go Enrichment Analysis (CC) of the Top30 Genes in Epithelial Cells of the Testing set (pvalueCutoff = 1, qvalueCutoff = 1)
ID	Description	GeneRatio	BgRatio	RichFactor	FoldEnrichment	zScore	pvalue	p.adjust	qvalue	geneID	Count
GO:0017053	transcription repressor complex	2/29	79/19960	0.0253165	17.4247	5.57951	0.00585952	0.261305	0.230604	SKI/CTNNBIP1	2
GO:0005796	Golgi lumen	2/29	106/19960	0.0188679	12.9863	4.71975	0.0103307	0.261305	0.230604	AGRN/SDF4	2
GO:1902554	serine/threonine protein kinase complex	2/29	139/19960	0.0143885	9.90325	4.01788	0.0172869	0.261305	0.230604	CCNL2/PRKCZ	2
GO:0030877	beta-catenin destruction complex	1/29	12/19960	0.0833333	57.3563	7.44882	0.017301	0.261305	0.230604	CTNNBIP1	1
GO:0030672	synaptic vesicle membrane	2/29	143/19960	0.013986	9.62624	3.94888	0.0182346	0.261305	0.230604	TPRG1L/KIF1B	2
GO:0099501	exocytic vesicle membrane	2/29	143/19960	0.013986	9.62624	3.94888	0.0182346	0.261305	0.230604	TPRG1L/KIF1B	2
GO:1902911	protein kinase complex	2/29	153/19960	0.0130719	8.99707	3.78766	0.0206982	0.261305	0.230604	CCNL2/PRKCZ	2
GO:0090571	RNA polymerase II transcription repressor complex	1/29	15/19960	0.0666667	45.8851	6.63337	0.0215808	0.261305	0.230604	CTNNBIP1	1
GO:0030133	transport vesicle	3/29	453/19960	0.00662252	4.55812	2.92199	0.0274127	0.261305	0.230604	TPRG1L/VAMP3/KIF1B	3
GO:0032426	stereocilium tip	1/29	21/19960	0.047619	32.775	5.5571	0.0300866	0.261305	0.230604	ESPN	1
GO:0044305	calyx of Held	1/29	21/19960	0.047619	32.775	5.5571	0.0300866	0.261305	0.230604	TPRG1L	1
GO:0005847	mRNA cleavage and polyadenylation specificity factor complex	1/29	24/19960	0.0416667	28.6782	5.17521	0.0343127	0.261305	0.230604	SSU72	1
GO:0098845	postsynaptic endosome	1/29	24/19960	0.0416667	28.6782	5.17521	0.0343127	0.261305	0.230604	CLSTN1	1
GO:0005849	mRNA cleavage factor complex	1/29	29/19960	0.0344828	23.7337	4.67313	0.0413167	0.263288	0.232354	SSU72	1
GO:0008021	synaptic vesicle	2/29	233/19960	0.00858369	5.90795	2.87443	0.0448089	0.263288	0.232354	TPRG1L/KIF1B	2
GO:0031941	filamentous actin	1/29	32/19960	0.03125	21.5086	4.42877	0.0454956	0.263288	0.232354	ESPN	1
GO:0099738	cell cortex region	1/29	36/19960	0.0277778	19.1188	4.15045	0.05104	0.263288	0.232354	PRKCZ	1
GO:0070382	exocytic vesicle	2/29	253/19960	0.00790514	5.44092	2.7116	0.0519223	0.263288	0.232354	TPRG1L/KIF1B	2
GO:0030658	transport vesicle membrane	2/29	254/19960	0.00787402	5.41949	2.70392	0.0522882	0.263288	0.232354	TPRG1L/KIF1B	2
GO:0005871	kinesin complex	1/29	48/19960	0.0208333	14.3391	3.52934	0.0674873	0.263288	0.232354	KIF1B	1
GO:0043209	myelin sheath	1/29	48/19960	0.0208333	14.3391	3.52934	0.0674873	0.263288	0.232354	PRKCZ	1
GO:0031201	SNARE complex	1/29	50/19960	0.02	13.7655	3.4474	0.0702017	0.263288	0.232354	VAMP3	1
GO:0061695	transferase complex, transferring phosphorus-containing groups	2/29	302/19960	0.00662252	4.55812	2.37661	0.0708974	0.263288	0.232354	CCNL2/PRKCZ	2
GO:0099568	cytoplasmic region	2/29	311/19960	0.00643087	4.42621	2.32289	0.0746	0.263288	0.232354	PRKCZ/KIF1B	2
GO:0000307	cyclin-dependent protein kinase holoenzyme complex	1/29	59/19960	0.0169492	11.6657	3.12955	0.082322	0.263288	0.232354	CCNL2	1
GO:0031463	Cul3-RING ubiquitin ligase complex	1/29	59/19960	0.0169492	11.6657	3.12955	0.082322	0.263288	0.232354	KLHL21	1
GO:0032420	stereocilium	1/29	63/19960	0.015873	10.925	3.00962	0.0876598	0.263288	0.232354	ESPN	1
GO:1904115	axon cytoplasm	1/29	64/19960	0.015625	10.7543	2.98131	0.0889895	0.263288	0.232354	KIF1B	1
GO:0005778	peroxisomal membrane	1/29	65/19960	0.0153846	10.5889	2.95363	0.0903174	0.263288	0.232354	PEX14	1
GO:0031903	microbody membrane	1/29	65/19960	0.0153846	10.5889	2.95363	0.0903174	0.263288	0.232354	PEX14	1
GO:0000151	ubiquitin ligase complex	2/29	355/19960	0.0056338	3.87761	2.08673	0.0935559	0.263288	0.232354	KLHL21/UBE4B	2
GO:0014069	postsynaptic density	2/29	359/19960	0.00557103	3.83441	2.06716	0.0953444	0.263288	0.232354	PRKCZ/CLSTN1	2
GO:0032421	stereocilium bundle	1/29	70/19960	0.0142857	9.83251	2.82371	0.0969287	0.263288	0.232354	ESPN	1
GO:0032279	asymmetric synapse	2/29	375/19960	0.00533333	3.6708	1.99159	0.102598	0.263288	0.232354	PRKCZ/CLSTN1	2
GO:0030669	clathrin-coated endocytic vesicle membrane	1/29	75/19960	0.0133333	9.17701	2.70624	0.103494	0.263288	0.232354	VAMP3	1
GO:0099572	postsynaptic specialization	2/29	396/19960	0.00505051	3.47614	1.89844	0.112346	0.263288	0.232354	PRKCZ/CLSTN1	2
GO:0030670	phagocytic vesicle membrane	1/29	82/19960	0.0121951	8.39361	2.55906	0.112607	0.263288	0.232354	VAMP3	1
GO:0005876	spindle microtubule	1/29	83/19960	0.0120482	8.29248	2.53947	0.113902	0.263288	0.232354	KLHL21	1
GO:0001725	stress fiber	1/29	85/19960	0.0117647	8.09736	2.50125	0.116486	0.263288	0.232354	PRKCZ	1
GO:0097517	contractile actin filament bundle	1/29	85/19960	0.0117647	8.09736	2.50125	0.116486	0.263288	0.232354	PRKCZ	1
GO:0098984	neuron to neuron synapse	2/29	412/19960	0.00485437	3.34114	1.8316	0.119935	0.263288	0.232354	PRKCZ/CLSTN1	2
GO:0048786	presynaptic active zone	1/29	89/19960	0.011236	7.73344	2.42843	0.121631	0.263288	0.232354	TPRG1L	1
GO:0120111	neuron projection cytoplasm	1/29	89/19960	0.011236	7.73344	2.42843	0.121631	0.263288	0.232354	KIF1B	1
GO:0042641	actomyosin	1/29	91/19960	0.010989	7.56347	2.3937	0.124193	0.263288	0.232354	PRKCZ	1
GO:0005604	basement membrane	1/29	92/19960	0.0108696	7.48126	2.37673	0.125472	0.263288	0.232354	AGRN	1
GO:0045334	clathrin-coated endocytic vesicle	1/29	93/19960	0.0107527	7.40082	2.36001	0.126748	0.263288	0.232354	VAMP3	1
GO:0062023	collagen-containing extracellular matrix	2/29	430/19960	0.00465116	3.20128	1.7602	0.128624	0.263288	0.232354	AGRN/MMP23B	2
GO:0032432	actin filament bundle	1/29	95/19960	0.0105263	7.24501	2.32731	0.129296	0.263288	0.232354	PRKCZ	1
GO:0043202	lysosomal lumen	1/29	98/19960	0.0102041	7.02322	2.28	0.133104	0.263288	0.232354	AGRN	1
GO:0098685	Schaffer collateral - CA1 synapse	1/29	99/19960	0.010101	6.95228	2.26467	0.134369	0.263288	0.232354	PRKCZ	1
GO:0005902	microvillus	1/29	100/19960	0.01	6.88276	2.24955	0.135633	0.263288	0.232354	ESPN	1
GO:0005903	brush border	1/29	109/19960	0.00917431	6.31446	2.12219	0.146929	0.26937	0.237721	ESPN	1
GO:0016605	PML body	1/29	109/19960	0.00917431	6.31446	2.12219	0.146929	0.26937	0.237721	SKI	1
GO:0055038	recycling endosome membrane	1/29	109/19960	0.00917431	6.31446	2.12219	0.146929	0.26937	0.237721	VAMP3	1
GO:0032588	trans-Golgi network membrane	1/29	112/19960	0.00892857	6.14532	2.08289	0.150662	0.271192	0.23933	VAMP3	1
GO:0043679	axon terminus	1/29	117/19960	0.00854701	5.8827	2.02047	0.15685	0.27457	0.24231	TPRG1L	1
GO:0005874	microtubule	2/29	489/19960	0.00408998	2.81503	1.55006	0.158086	0.27457	0.24231	KLHL21/KIF1B	2
GO:0005884	actin filament	1/29	123/19960	0.00813008	5.59574	1.95018	0.164217	0.280302	0.247369	ESPN	1
GO:0005923	bicellular tight junction	1/29	128/19960	0.0078125	5.37716	1.89504	0.170309	0.283012	0.249761	PRKCZ	1
GO:0016363	nuclear matrix	1/29	129/19960	0.00775194	5.33547	1.88436	0.171522	0.283012	0.249761	PRKCZ	1
GO:0044306	neuron projection terminus	1/29	133/19960	0.0075188	5.17501	1.84272	0.176358	0.283528	0.250216	TPRG1L	1
GO:0070160	tight junction	1/29	134/19960	0.00746269	5.13639	1.83257	0.177563	0.283528	0.250216	PRKCZ	1
GO:0030665	clathrin-coated vesicle membrane	1/29	138/19960	0.00724638	4.98751	1.79296	0.182365	0.286573	0.252904	VAMP3	1
GO:0045335	phagocytic vesicle	1/29	145/19960	0.00689655	4.74673	1.7272	0.190703	0.287831	0.254014	VAMP3	1
GO:0005777	peroxisome	1/29	146/19960	0.00684932	4.71422	1.71815	0.191887	0.287831	0.254014	PEX14	1
GO:0042579	microbody	1/29	146/19960	0.00684932	4.71422	1.71815	0.191887	0.287831	0.254014	PEX14	1
GO:0001650	fibrillar center	1/29	150/19960	0.00666667	4.58851	1.68275	0.196608	0.289655	0.255623	PEX14	1
GO:0043296	apical junction complex	1/29	154/19960	0.00649351	4.46932	1.64858	0.201303	0.289655	0.255623	PRKCZ	1
GO:0034399	nuclear periphery	1/29	155/19960	0.00645161	4.44049	1.64022	0.202472	0.289655	0.255623	PRKCZ	1
GO:0005875	microtubule associated complex	1/29	157/19960	0.00636943	4.38392	1.62371	0.204806	0.289655	0.255623	KIF1B	1
GO:0098862	cluster of actin-based cell projections	1/29	173/19960	0.00578035	3.97847	1.50083	0.223242	0.311281	0.274708	ESPN	1
GO:0005775	vacuolar lumen	1/29	178/19960	0.00561798	3.86672	1.46543	0.228918	0.313514	0.276679	AGRN	1
GO:0000922	spindle pole	1/29	180/19960	0.00555556	3.82375	1.45162	0.231177	0.313514	0.276679	KLHL21	1
GO:0031901	early endosome membrane	1/29	200/19960	0.005	3.44138	1.32361	0.25342	0.339035	0.299202	VAMP3	1
GO:0030662	coated vesicle membrane	1/29	205/19960	0.00487805	3.35744	1.29415	0.258883	0.339824	0.299898	VAMP3	1
GO:0030666	endocytic vesicle membrane	1/29	207/19960	0.00483092	3.325	1.28261	0.261058	0.339824	0.299898	VAMP3	1
GO:0055037	recycling endosome	1/29	210/19960	0.0047619	3.2775	1.26558	0.264308	0.339824	0.299898	VAMP3	1
GO:0030136	clathrin-coated vesicle	1/29	220/19960	0.00454545	3.12853	1.21093	0.275041	0.349091	0.308076	VAMP3	1
GO:0031461	cullin-RING ubiquitin ligase complex	1/29	230/19960	0.00434783	2.9925	1.15932	0.285624	0.357934	0.31588	KLHL21	1
GO:0098858	actin-based cell projection	1/29	234/19960	0.0042735	2.94135	1.13945	0.289815	0.358646	0.316509	ESPN	1
GO:0005802	trans-Golgi network	1/29	269/19960	0.00371747	2.55865	0.981734	0.325489	0.39782	0.35108	VAMP3	1
GO:0032838	plasma membrane bounded cell projection cytoplasm	1/29	275/19960	0.00363636	2.50282	0.957216	0.331428	0.400139	0.353126	KIF1B	1
GO:0150034	distal axon	1/29	281/19960	0.00355872	2.44938	0.933336	0.337317	0.402342	0.35507	TPRG1L	1
GO:0005788	endoplasmic reticulum lumen	1/29	314/19960	0.00318471	2.19196	0.812071	0.36882	0.426371	0.376276	H6PD	1
GO:0005770	late endosome	1/29	318/19960	0.00314465	2.16439	0.798404	0.372539	0.426371	0.376276	SDF4	1
GO:0030135	coated vesicle	1/29	320/19960	0.003125	2.15086	0.791647	0.37439	0.426371	0.376276	VAMP3	1
GO:0045211	postsynaptic membrane	1/29	321/19960	0.00311526	2.14416	0.788286	0.375314	0.426371	0.376276	CLSTN1	1
GO:0005938	cell cortex	1/29	325/19960	0.00307692	2.11777	0.774967	0.378996	0.426371	0.376276	PRKCZ	1
GO:0030139	endocytic vesicle	1/29	356/19960	0.00280899	1.93336	0.677806	0.406829	0.45254	0.399371	VAMP3	1
GO:0098791	Golgi apparatus subcompartment	1/29	391/19960	0.00255754	1.7603	0.57915	0.436806	0.480486	0.424034	VAMP3	1
GO:0009897	external side of plasma membrane	1/29	407/19960	0.002457	1.6911	0.537319	0.450017	0.485136	0.428137	TNFRSF14	1
GO:0016324	apical plasma membrane	1/29	408/19960	0.00245098	1.68695	0.534766	0.450833	0.485136	0.428137	PRKCZ	1
GO:0016607	nuclear speck	1/29	416/19960	0.00240385	1.65451	0.514588	0.457317	0.486821	0.429624	CCNL2	1
GO:0031252	cell leading edge	1/29	433/19960	0.00230947	1.58955	0.473099	0.47085	0.489605	0.432081	PRKCZ	1
GO:0005819	spindle	1/29	434/19960	0.00230415	1.58589	0.470714	0.471636	0.489605	0.432081	KLHL21	1
GO:0005769	early endosome	1/29	438/19960	0.00228311	1.57141	0.461236	0.474768	0.489605	0.432081	VAMP3	1
GO:0097060	synaptic membrane	1/29	453/19960	0.00220751	1.51937	0.426518	0.486355	0.496383	0.438062	CLSTN1	1
GO:0045177	apical part of cell	1/29	474/19960	0.0021097	1.45206	0.37995	0.502163	0.507287	0.447685	PRKCZ	1
GO:0005635	nuclear envelope	1/29	498/19960	0.00200803	1.38208	0.329366	0.519653	0.519653	0.458599	PRKCZ	1
Table S20: Go Enrichment Analysis (MF) of the Top30 Genes in Epithelial Cells of the Testing set (pvalueCutoff = 1, qvalueCutoff = 1)
ID	Description	GeneRatio	BgRatio	RichFactor	FoldEnrichment	zScore	pvalue	p.adjust	qvalue	geneID	Count
GO:0019894	kinesin binding	2/30	42/18737	0.047619	29.7413	7.46732	0.00205049	0.181171	0.141264	CLSTN1/KIF1B	2
GO:0031625	ubiquitin protein ligase binding	3/30	301/18737	0.00996678	6.22492	3.65954	0.0120937	0.181171	0.141264	ISG15/SKI/TNFRSF14	3
GO:0008013	beta-catenin binding	2/30	106/18737	0.0188679	11.7843	4.45885	0.0124389	0.181171	0.141264	CTNNBIP1/LZIC	2
GO:0044389	ubiquitin-like protein ligase binding	3/30	321/18737	0.00934579	5.83707	3.50053	0.0143665	0.181171	0.141264	ISG15/SKI/TNFRSF14	3
GO:0005031	tumor necrosis factor receptor activity	1/30	10/18737	0.1	62.4567	7.78452	0.0159	0.181171	0.141264	TNFRSF14	1
GO:0035374	chondroitin sulfate binding	1/30	10/18737	0.1	62.4567	7.78452	0.0159	0.181171	0.141264	AGRN	1
GO:0002162	dystroglycan binding	1/30	11/18737	0.0909091	56.7788	7.41037	0.0174765	0.181171	0.141264	AGRN	1
GO:0005035	death receptor activity	1/30	13/18737	0.0769231	48.0436	6.79469	0.0206222	0.181171	0.141264	TNFRSF14	1
GO:0008420	RNA polymerase II CTD heptapeptide repeat phosphatase activity	1/30	13/18737	0.0769231	48.0436	6.79469	0.0206222	0.181171	0.141264	SSU72	1
GO:0043560	insulin receptor substrate binding	1/30	13/18737	0.0769231	48.0436	6.79469	0.0206222	0.181171	0.141264	PRKCZ	1
GO:0031386	protein tag activity	1/30	14/18737	0.0714286	44.6119	6.537	0.0221914	0.181171	0.141264	ISG15	1
GO:0141047	molecular tag activity	1/30	14/18737	0.0714286	44.6119	6.537	0.0221914	0.181171	0.141264	ISG15	1
GO:0034450	ubiquitin-ubiquitin ligase activity	1/30	15/18737	0.0666667	41.6378	6.30516	0.0237581	0.181171	0.141264	UBE4B	1
GO:0004697	diacylglycerol-dependent serine/threonine kinase activity	1/30	16/18737	0.0625	39.0354	6.0951	0.0253224	0.181171	0.141264	PRKCZ	1
GO:0008574	plus-end-directed microtubule motor activity	1/30	18/18737	0.0555556	34.6981	5.72793	0.0284438	0.181171	0.141264	KIF1B	1
GO:0017075	syntaxin-1 binding	1/30	19/18737	0.0526316	32.8719	5.56612	0.0300009	0.181171	0.141264	VAMP3	1
GO:0043395	heparan sulfate proteoglycan binding	1/30	19/18737	0.0526316	32.8719	5.56612	0.0300009	0.181171	0.141264	AGRN	1
GO:0016881	acid-amino acid ligase activity	1/30	22/18737	0.0454545	28.3894	5.14749	0.0346576	0.181171	0.141264	TTLL10	1
GO:0033691	sialic acid binding	1/30	22/18737	0.0454545	28.3894	5.14749	0.0346576	0.181171	0.141264	AGRN	1
GO:0043274	phospholipase binding	1/30	23/18737	0.0434783	27.1551	5.02613	0.0362051	0.181171	0.141264	PRKCZ	1
GO:0140994	RNA polymerase II CTD heptapeptide repeat modifying activity	1/30	23/18737	0.0434783	27.1551	5.02613	0.0362051	0.181171	0.141264	SSU72	1
GO:0052689	carboxylic ester hydrolase activity	2/30	195/18737	0.0102564	6.40581	3.03876	0.0387344	0.181171	0.141264	PLCH2/H6PD	2
GO:0004435	phosphatidylinositol phospholipase C activity	1/30	26/18737	0.0384615	24.0218	4.70408	0.040833	0.181171	0.141264	PLCH2	1
GO:0097602	cullin family protein binding	1/30	26/18737	0.0384615	24.0218	4.70408	0.040833	0.181171	0.141264	KLHL21	1
GO:0008320	protein transmembrane transporter activity	1/30	27/18737	0.037037	23.1321	4.60855	0.0423709	0.181171	0.141264	PEX14	1
GO:0004629	phospholipase C activity	1/30	29/18737	0.0344828	21.5368	4.43215	0.0454394	0.181171	0.141264	PLCH2	1
GO:0043236	laminin binding	1/30	29/18737	0.0344828	21.5368	4.43215	0.0454394	0.181171	0.141264	AGRN	1
GO:0015215	nucleotide transmembrane transporter activity	1/30	30/18737	0.0333333	20.8189	4.35046	0.0469702	0.181171	0.141264	SLC25A33	1
GO:0022884	macromolecule transmembrane transporter activity	1/30	32/18737	0.03125	19.5177	4.19837	0.0500245	0.185573	0.144696	PEX14	1
GO:0071889	14-3-3 protein binding	1/30	33/18737	0.030303	18.9263	4.1274	0.0515481	0.185573	0.144696	PRKCZ	1
GO:0005484	SNAP receptor activity	1/30	37/18737	0.027027	16.8802	3.87197	0.057619	0.194464	0.151629	VAMP3	1
GO:0043394	proteoglycan binding	1/30	37/18737	0.027027	16.8802	3.87197	0.057619	0.194464	0.151629	AGRN	1
GO:0140318	protein transporter activity	1/30	41/18737	0.0243902	15.2333	3.6536	0.0636523	0.206962	0.161374	PEX14	1
GO:0048487	beta-tubulin binding	1/30	42/18737	0.0238095	14.8706	3.60375	0.0651548	0.206962	0.161374	PEX14	1
GO:0016538	cyclin-dependent protein serine/threonine kinase regulator activity	1/30	47/18737	0.0212766	13.2887	3.37789	0.0726323	0.216353	0.168696	CCNL2	1
GO:0008017	microtubule binding	2/30	280/18737	0.00714286	4.46119	2.3368	0.0736211	0.216353	0.168696	KIF1B/PEX14	2
GO:0016879	ligase activity, forming carbon-nitrogen bonds	1/30	48/18737	0.0208333	13.0118	3.33682	0.0741209	0.216353	0.168696	TTLL10	1
GO:0015605	organophosphate ester transmembrane transporter activity	1/30	50/18737	0.02	12.4913	3.25824	0.077091	0.217586	0.169658	SLC25A33	1
GO:0030544	Hsp70 protein binding	1/30	51/18737	0.0196078	12.2464	3.22061	0.0785727	0.217586	0.169658	RNF207	1
GO:0050661	NADP binding	1/30	54/18737	0.0185185	11.566	3.11375	0.0830038	0.22411	0.174745	H6PD	1
GO:0015932	nucleobase-containing compound transmembrane transporter activity	1/30	57/18737	0.0175439	10.9573	3.015	0.0874143	0.230262	0.179542	SLC25A33	1
GO:0015459	potassium channel regulator activity	1/30	59/18737	0.0169492	10.5859	2.95318	0.0903433	0.232311	0.181139	PRKCZ	1
GO:0019905	syntaxin binding	1/30	61/18737	0.0163934	10.2388	2.89425	0.0932631	0.234242	0.182645	VAMP3	1
GO:0050840	extracellular matrix binding	1/30	65/18737	0.0153846	9.60872	2.78418	0.0990757	0.243186	0.189618	AGRN	1
GO:0003777	microtubule motor activity	1/30	68/18737	0.0147059	9.1848	2.70769	0.103411	0.248187	0.193518	KIF1B	1
GO:0042578	phosphoric ester hydrolase activity	2/30	363/18737	0.00550964	3.44114	1.88079	0.114282	0.26571	0.207181	SSU72/PLCH2	2
GO:0001618	virus receptor activity	1/30	79/18737	0.0126582	7.90591	2.46319	0.119137	0.26571	0.207181	TNFRSF14	1
GO:0046332	SMAD binding	1/30	79/18737	0.0126582	7.90591	2.46319	0.119137	0.26571	0.207181	SKI	1
GO:0140272	exogenous protein binding	1/30	80/18737	0.0125	7.80708	2.44333	0.120554	0.26571	0.207181	TNFRSF14	1
GO:0001540	amyloid-beta binding	1/30	83/18737	0.0120482	7.5249	2.38574	0.124789	0.265734	0.2072	CLSTN1	1
GO:0017018	myosin phosphatase activity	1/30	84/18737	0.0119048	7.43532	2.36719	0.126197	0.265734	0.2072	SSU72	1
GO:0015631	tubulin binding	2/30	392/18737	0.00510204	3.18656	1.75204	0.129631	0.265734	0.2072	KIF1B/PEX14	2
GO:0008081	phosphoric diester hydrolase activity	1/30	87/18737	0.0114943	7.17893	2.31329	0.130406	0.265734	0.2072	PLCH2	1
GO:0016887	ATP hydrolysis activity	2/30	418/18737	0.00478469	2.98836	1.64637	0.143789	0.287578	0.224233	ATAD3C/KIF1B	2
GO:0004620	phospholipase activity	1/30	104/18737	0.00961538	6.00545	2.04982	0.153893	0.289295	0.225571	PLCH2	1
GO:0004722	protein serine/threonine phosphatase activity	1/30	105/18737	0.00952381	5.94825	2.03617	0.155255	0.289295	0.225571	SSU72	1
GO:0000149	SNARE binding	1/30	107/18737	0.00934579	5.83707	2.00939	0.157973	0.289295	0.225571	VAMP3	1
GO:0004222	metalloendopeptidase activity	1/30	110/18737	0.00909091	5.67788	1.97047	0.162035	0.289295	0.225571	MMP23B	1
GO:0004842	ubiquitin-protein transferase activity	2/30	452/18737	0.00442478	2.76357	1.51989	0.162784	0.289295	0.225571	KLHL21/UBE4B	2
GO:0003774	cytoskeletal motor activity	1/30	113/18737	0.00884956	5.52714	1.93296	0.166077	0.289295	0.225571	KIF1B	1
GO:0005200	structural constituent of cytoskeleton	1/30	113/18737	0.00884956	5.52714	1.93296	0.166077	0.289295	0.225571	AGRN	1
GO:0017124	SH3 domain binding	1/30	113/18737	0.00884956	5.52714	1.93296	0.166077	0.289295	0.225571	ESPN	1
GO:1990756	ubiquitin-like ligase-substrate adaptor activity	1/30	119/18737	0.00840336	5.24846	1.86181	0.174106	0.292555	0.228113	KLHL21	1
GO:0016616	oxidoreductase activity, acting on the CH-OH group of donors, NAD or NADP as acceptor	1/30	122/18737	0.00819672	5.1194	1.82801	0.178092	0.292555	0.228113	H6PD	1
GO:0019787	ubiquitin-like protein transferase activity	2/30	482/18737	0.00414938	2.59156	1.4176	0.179918	0.292555	0.228113	KLHL21/UBE4B	2
GO:0016298	lipase activity	1/30	129/18737	0.00775194	4.8416	1.75329	0.187321	0.292555	0.228113	PLCH2	1
GO:0016755	aminoacyltransferase activity	2/30	499/18737	0.00400802	2.50327	1.363	0.189756	0.292555	0.228113	KLHL21/UBE4B	2
GO:0031072	heat shock protein binding	1/30	131/18737	0.00763359	4.76768	1.73293	0.189939	0.292555	0.228113	RNF207	1
GO:0016614	oxidoreductase activity, acting on CH-OH group of donors	1/30	132/18737	0.00757576	4.73157	1.7229	0.191245	0.292555	0.228113	H6PD	1
GO:0140767	enzyme-substrate adaptor activity	1/30	132/18737	0.00757576	4.73157	1.7229	0.191245	0.292555	0.228113	KLHL21	1
GO:0051087	protein-folding chaperone binding	1/30	134/18737	0.00746269	4.66095	1.70314	0.193851	0.292555	0.228113	RNF207	1
GO:0015297	antiporter activity	1/30	136/18737	0.00735294	4.5924	1.68377	0.196449	0.292555	0.228113	SLC35E2B	1
GO:0044325	transmembrane transporter binding	1/30	137/18737	0.00729927	4.55888	1.67423	0.197745	0.292555	0.228113	RNF207	1
GO:0019955	cytokine binding	1/30	143/18737	0.00699301	4.3676	1.61882	0.205479	0.299888	0.233831	TNFRSF14	1
GO:0099106	ion channel regulator activity	1/30	159/18737	0.00628931	3.92809	1.48484	0.225751	0.321524	0.250701	PRKCZ	1
GO:0005178	integrin binding	1/30	161/18737	0.00621118	3.8793	1.46933	0.22825	0.321524	0.250701	ISG15	1
GO:0005201	extracellular matrix structural constituent	1/30	166/18737	0.0060241	3.76245	1.43162	0.234462	0.321524	0.250701	AGRN	1
GO:0016247	channel regulator activity	1/30	167/18737	0.00598802	3.73992	1.42425	0.235699	0.321524	0.250701	PRKCZ	1
GO:0016874	ligase activity	1/30	167/18737	0.00598802	3.73992	1.42425	0.235699	0.321524	0.250701	TTLL10	1
GO:0141108	transporter regulator activity	1/30	169/18737	0.00591716	3.69566	1.40969	0.238166	0.321524	0.250701	PRKCZ	1
GO:0004721	phosphoprotein phosphatase activity	1/30	178/18737	0.00561798	3.5088	1.34678	0.249175	0.331376	0.258383	SSU72	1
GO:0016853	isomerase activity	1/30	180/18737	0.00555556	3.46981	1.33335	0.251601	0.331376	0.258383	KIF1B	1
GO:0008237	metallopeptidase activity	1/30	185/18737	0.00540541	3.37604	1.30059	0.257631	0.334325	0.260682	MMP23B	1
GO:0031406	carboxylic acid binding	1/30	187/18737	0.00534759	3.33993	1.2878	0.26003	0.334325	0.260682	AGRN	1
GO:0043177	organic acid binding	1/30	199/18737	0.00502513	3.13853	1.21453	0.274268	0.348482	0.271721	AGRN	1
GO:0003714	transcription corepressor activity	1/30	205/18737	0.00487805	3.04667	1.17994	0.281287	0.350628	0.273394	PEX14	1
GO:0005516	calmodulin binding	1/30	206/18737	0.00485437	3.03188	1.1743	0.282451	0.350628	0.273394	TPRG1L	1
GO:0051015	actin filament binding	1/30	211/18737	0.00473934	2.96003	1.1466	0.288241	0.35375	0.275828	ESPN	1
GO:0019887	protein kinase regulator activity	1/30	243/18737	0.00411523	2.57023	0.986618	0.324242	0.388322	0.302786	CCNL2	1
GO:0033218	amide binding	1/30	244/18737	0.00409836	2.5597	0.98204	0.325338	0.388322	0.302786	CLSTN1	1
GO:0005539	glycosaminoglycan binding	1/30	246/18737	0.00406504	2.53889	0.972952	0.327525	0.388322	0.302786	AGRN	1
GO:0042277	peptide binding	1/30	249/18737	0.00401606	2.5083	0.959488	0.330793	0.388322	0.302786	CLSTN1	1
GO:0001227	DNA-binding transcription repressor activity, RNA polymerase II-specific	1/30	268/18737	0.00373134	2.33047	0.878514	0.351137	0.400785	0.312503	SKI	1
GO:0016791	phosphatase activity	1/30	273/18737	0.003663	2.28779	0.858342	0.35639	0.400785	0.312503	SSU72	1
GO:0019207	kinase regulator activity	1/30	273/18737	0.003663	2.28779	0.858342	0.35639	0.400785	0.312503	CCNL2	1
GO:1901681	sulfur compound binding	1/30	277/18737	0.00361011	2.25475	0.842518	0.360563	0.400785	0.312503	AGRN	1
GO:0001217	DNA-binding transcription repressor activity	1/30	278/18737	0.00359712	2.24664	0.838605	0.361602	0.400785	0.312503	SKI	1
GO:0030246	carbohydrate binding	1/30	280/18737	0.00357143	2.2306	0.830827	0.363676	0.400785	0.312503	H6PD	1
GO:0015291	secondary active transmembrane transporter activity	1/30	288/18737	0.00347222	2.16863	0.80036	0.371905	0.405714	0.316346	SLC35E2B	1
GO:0061630	ubiquitin protein ligase activity	1/30	355/18737	0.0028169	1.75934	0.578432	0.436899	0.471851	0.367915	UBE4B	1
GO:0106310	protein serine kinase activity	1/30	363/18737	0.00275482	1.72057	0.555168	0.444211	0.474997	0.370368	PRKCZ	1
GO:0061659	ubiquitin-like protein ligase activity	1/30	374/18737	0.0026738	1.66996	0.524098	0.454114	0.480827	0.374914	UBE4B	1
GO:0004175	endopeptidase activity	1/30	404/18737	0.00247525	1.54596	0.444252	0.480265	0.503579	0.392654	MMP23B	1
GO:0004857	enzyme inhibitor activity	1/30	410/18737	0.00243902	1.52333	0.429064	0.485348	0.504015	0.392994	SKI	1
GO:0004674	protein serine/threonine kinase activity	1/30	429/18737	0.002331	1.45587	0.38251	0.501128	0.515446	0.401907	PRKCZ	1
GO:0003779	actin binding	1/30	441/18737	0.00226757	1.41625	0.354237	0.510853	0.520492	0.405841	ESPN	1
GO:0022804	active transmembrane transporter activity	1/30	458/18737	0.00218341	1.36368	0.315556	0.524316	0.529216	0.412644	SLC35E2B	1
GO:0140297	DNA-binding transcription factor binding	1/30	488/18737	0.00204918	1.27985	0.250849	0.547206	0.547206	0.426671	SKI	1

## Sheet: Table S20(GO_TOP30_B)
Table S20: Go Enrichment Analysis (BP) of the Top30 Genes in B Cells of the Testing set (pvalueCutoff = 1, qvalueCutoff = 1)
ID	Description	GeneRatio	BgRatio	RichFactor	FoldEnrichment	zScore	pvalue	p.adjust	qvalue	geneID	Count
GO:2001235	positive regulation of apoptotic signaling pathway	3/30	153/18986	0.0196078	12.4092	5.63679	0.00177597	0.247286	0.208666	FAF1/CTSS/BCL2L11	3
GO:0051017	actin filament bundle assembly	3/30	164/18986	0.0182927	11.5768	5.41174	0.00216469	0.247286	0.208666	CCDC88A/CD47/ADD1	3
GO:0061572	actin filament bundle organization	3/30	168/18986	0.0178571	11.3012	5.33517	0.00231813	0.247286	0.208666	CCDC88A/CD47/ADD1	3
GO:0072599	establishment of protein localization to endoplasmic reticulum	2/30	50/18986	0.04	25.3147	6.8486	0.00282062	0.247286	0.208666	RAB10/SEC62	2
GO:0051496	positive regulation of stress fiber assembly	2/30	51/18986	0.0392157	24.8183	6.77573	0.00293287	0.247286	0.208666	CCDC88A/CD47	2
GO:0032233	positive regulation of actin filament bundle assembly	2/30	61/18986	0.0327869	20.7497	6.14611	0.00416851	0.247286	0.208666	CCDC88A/CD47	2
GO:0010720	positive regulation of cell development	4/30	460/18986	0.00869565	5.50319	3.88956	0.00565829	0.247286	0.208666	SPEN/CXCR4/PBRM1/ADD1	4
GO:0045806	negative regulation of endocytosis	2/30	76/18986	0.0263158	16.6544	5.43988	0.00639737	0.247286	0.208666	CD47/RUBCN	2
GO:1903036	positive regulation of response to wounding	2/30	81/18986	0.0246914	15.6263	5.24786	0.00723735	0.247286	0.208666	PUM2/CXCR4	2
GO:0070972	protein localization to endoplasmic reticulum	2/30	83/18986	0.0240964	15.2498	5.17577	0.00758661	0.247286	0.208666	RAB10/SEC62	2
GO:0043242	negative regulation of protein-containing complex disassembly	2/30	84/18986	0.0238095	15.0683	5.14066	0.00776406	0.247286	0.208666	RUBCN/ADD1	2
GO:0110053	regulation of actin filament organization	3/30	273/18986	0.010989	6.95458	3.94233	0.00896139	0.247286	0.208666	CCDC88A/CD47/ADD1	3
GO:0045185	maintenance of protein location	2/30	95/18986	0.0210526	13.3235	4.79028	0.00983826	0.247286	0.208666	FAF1/CCDC88A	2
GO:0051492	regulation of stress fiber assembly	2/30	95/18986	0.0210526	13.3235	4.79028	0.00983826	0.247286	0.208666	CCDC88A/CD47	2
GO:0110020	regulation of actomyosin structure organization	2/30	106/18986	0.0188679	11.9409	4.49362	0.0121311	0.247286	0.208666	CCDC88A/CD47	2
GO:0032231	regulation of actin filament bundle assembly	2/30	107/18986	0.0186916	11.8293	4.46884	0.0123502	0.247286	0.208666	CCDC88A/CD47	2
GO:0030038	contractile actin filament bundle assembly	2/30	112/18986	0.0178571	11.3012	4.34968	0.0134712	0.247286	0.208666	CCDC88A/CD47	2
GO:0043149	stress fiber assembly	2/30	112/18986	0.0178571	11.3012	4.34968	0.0134712	0.247286	0.208666	CCDC88A/CD47	2
GO:0048638	regulation of developmental growth	3/30	325/18986	0.00923077	5.84185	3.5025	0.0143364	0.247286	0.208666	PUM2/BCL2L11/CXCR4	3
GO:0006368	transcription elongation by RNA polymerase II	2/30	118/18986	0.0169492	10.7266	4.21628	0.0148729	0.247286	0.208666	PBRM1/EAF2	2
GO:0019882	antigen processing and presentation	2/30	118/18986	0.0169492	10.7266	4.21628	0.0148729	0.247286	0.208666	CTSS/RAB10	2
GO:0042994	cytoplasmic sequestering of transcription factor	1/30	10/18986	0.1	63.2867	7.83764	0.0156929	0.247286	0.208666	FAF1	1
GO:0060368	regulation of Fc receptor mediated stimulatory signaling pathway	1/30	10/18986	0.1	63.2867	7.83764	0.0156929	0.247286	0.208666	CD47	1
GO:0060768	regulation of epithelial cell proliferation involved in prostate gland development	1/30	10/18986	0.1	63.2867	7.83764	0.0156929	0.247286	0.208666	EAF2	1
GO:1902237	positive regulation of endoplasmic reticulum stress-induced intrinsic apoptotic signaling pathway	1/30	10/18986	0.1	63.2867	7.83764	0.0156929	0.247286	0.208666	BCL2L11	1
GO:1904669	ATP export	1/30	10/18986	0.1	63.2867	7.83764	0.0156929	0.247286	0.208666	CD47	1
GO:0045446	endothelial cell differentiation	2/30	125/18986	0.016	10.1259	4.0723	0.0165844	0.247286	0.208666	CXCR4/ADD1	2
GO:0006275	regulation of DNA replication	2/30	127/18986	0.015748	9.9664	4.03323	0.0170882	0.247286	0.208666	FAF1/ZBTB38	2
GO:0035696	monocyte extravasation	1/30	11/18986	0.0909091	57.5333	7.4611	0.0172491	0.247286	0.208666	CD47	1
GO:0060767	epithelial cell proliferation involved in prostate gland development	1/30	11/18986	0.0909091	57.5333	7.4611	0.0172491	0.247286	0.208666	EAF2	1
GO:0071349	cellular response to interleukin-12	1/30	11/18986	0.0909091	57.5333	7.4611	0.0172491	0.247286	0.208666	CD47	1
GO:1900246	positive regulation of RIG-I signaling pathway	1/30	11/18986	0.0909091	57.5333	7.4611	0.0172491	0.247286	0.208666	PUM2	1
GO:1903564	regulation of protein localization to cilium	1/30	11/18986	0.0909091	57.5333	7.4611	0.0172491	0.247286	0.208666	CCDC88A	1
GO:2000271	positive regulation of fibroblast apoptotic process	1/30	11/18986	0.0909091	57.5333	7.4611	0.0172491	0.247286	0.208666	BCL2L11	1
GO:0043244	regulation of protein-containing complex disassembly	2/30	129/18986	0.0155039	9.81189	3.99503	0.0175985	0.247286	0.208666	RUBCN/ADD1	2
GO:0032956	regulation of actin cytoskeleton organization	3/30	352/18986	0.00852273	5.39375	3.31014	0.0177155	0.247286	0.208666	CCDC88A/CD47/ADD1	3
GO:0048755	branching morphogenesis of a nerve	1/30	12/18986	0.0833333	52.7389	7.13216	0.0188028	0.247286	0.208666	RERE	1
GO:0060148	positive regulation of post-transcriptional gene silencing	1/30	12/18986	0.0833333	52.7389	7.13216	0.0188028	0.247286	0.208666	PUM2	1
GO:0070671	response to interleukin-12	1/30	12/18986	0.0833333	52.7389	7.13216	0.0188028	0.247286	0.208666	CD47	1
GO:0097067	cellular response to thyroid hormone stimulus	1/30	12/18986	0.0833333	52.7389	7.13216	0.0188028	0.247286	0.208666	CTSS	1
GO:1900370	positive regulation of post-transcriptional gene silencing by RNA	1/30	12/18986	0.0833333	52.7389	7.13216	0.0188028	0.247286	0.208666	PUM2	1
GO:1902043	positive regulation of extrinsic apoptotic signaling pathway via death domain receptors	1/30	12/18986	0.0833333	52.7389	7.13216	0.0188028	0.247286	0.208666	FAF1	1
GO:2000637	positive regulation of miRNA-mediated gene silencing	1/30	12/18986	0.0833333	52.7389	7.13216	0.0188028	0.247286	0.208666	PUM2	1
GO:0006354	DNA-templated transcription elongation	2/30	134/18986	0.0149254	9.44577	3.90306	0.0189026	0.247286	0.208666	PBRM1/EAF2	2
GO:0051983	regulation of chromosome segregation	2/30	135/18986	0.0148148	9.3758	3.88525	0.0191682	0.247286	0.208666	PUM2/PBRM1	2
GO:0048680	positive regulation of axon regeneration	1/30	13/18986	0.0769231	48.6821	6.8415	0.0203542	0.247286	0.208666	PUM2	1
GO:0070572	positive regulation of neuron projection regeneration	1/30	13/18986	0.0769231	48.6821	6.8415	0.0203542	0.247286	0.208666	PUM2	1
GO:1900103	positive regulation of endoplasmic reticulum unfolded protein response	1/30	13/18986	0.0769231	48.6821	6.8415	0.0203542	0.247286	0.208666	BCL2L11	1
GO:0021534	cell proliferation in hindbrain	1/30	14/18986	0.0714286	45.2048	6.58217	0.0219032	0.247286	0.208666	RERE	1
GO:0021924	cell proliferation in external granule layer	1/30	14/18986	0.0714286	45.2048	6.58217	0.0219032	0.247286	0.208666	RERE	1
GO:0021930	cerebellar granule cell precursor proliferation	1/30	14/18986	0.0714286	45.2048	6.58217	0.0219032	0.247286	0.208666	RERE	1
GO:0043353	enucleate erythrocyte differentiation	1/30	14/18986	0.0714286	45.2048	6.58217	0.0219032	0.247286	0.208666	SP3	1
GO:0060816	random inactivation of X chromosome	1/30	14/18986	0.0714286	45.2048	6.58217	0.0219032	0.247286	0.208666	SPEN	1
GO:0003158	endothelium development	2/30	148/18986	0.0135135	8.55225	3.66929	0.0227632	0.247286	0.208666	CXCR4/ADD1	2
GO:0006620	post-translational protein targeting to endoplasmic reticulum membrane	1/30	15/18986	0.0666667	42.1911	6.34887	0.0234499	0.247286	0.208666	SEC62	1
GO:0008298	intracellular mRNA localization	1/30	15/18986	0.0666667	42.1911	6.34887	0.0234499	0.247286	0.208666	PUM2	1
GO:0048070	regulation of developmental pigmentation	1/30	15/18986	0.0666667	42.1911	6.34887	0.0234499	0.247286	0.208666	BCL2L11	1
GO:0050966	detection of mechanical stimulus involved in sensory perception of pain	1/30	15/18986	0.0666667	42.1911	6.34887	0.0234499	0.247286	0.208666	CXCR4	1
GO:0055057	neuroblast division	1/30	15/18986	0.0666667	42.1911	6.34887	0.0234499	0.247286	0.208666	RAB10	1
GO:0070234	positive regulation of T cell apoptotic process	1/30	15/18986	0.0666667	42.1911	6.34887	0.0234499	0.247286	0.208666	BCL2L11	1
GO:1903894	regulation of IRE1-mediated unfolded protein response	1/30	15/18986	0.0666667	42.1911	6.34887	0.0234499	0.247286	0.208666	BCL2L11	1
GO:0032970	regulation of actin filament-based process	3/30	395/18986	0.00759494	4.80658	3.04141	0.0239466	0.247286	0.208666	CCDC88A/CD47/ADD1	3
GO:1902903	regulation of supramolecular fiber organization	3/30	400/18986	0.0075	4.7465	3.0127	0.0247394	0.247286	0.208666	CCDC88A/CD47/ADD1	3
GO:0061043	regulation of vascular wound healing	1/30	16/18986	0.0625	39.5542	6.13748	0.0249941	0.247286	0.208666	CXCR4	1
GO:2001233	regulation of apoptotic signaling pathway	3/30	403/18986	0.00744417	4.71117	2.9957	0.0252218	0.247286	0.208666	FAF1/CTSS/BCL2L11	3
GO:0001558	regulation of cell growth	3/30	408/18986	0.00735294	4.65343	2.96773	0.0260373	0.247286	0.208666	PUM2/CXCR4/EAF2	3
GO:0021535	cell migration in hindbrain	1/30	17/18986	0.0588235	37.2275	5.94474	0.026536	0.247286	0.208666	RERE	1
GO:0120305	regulation of pigmentation	1/30	17/18986	0.0588235	37.2275	5.94474	0.026536	0.247286	0.208666	BCL2L11	1
GO:1901096	regulation of autophagosome maturation	1/30	17/18986	0.0588235	37.2275	5.94474	0.026536	0.247286	0.208666	RUBCN	1
GO:1901550	regulation of endothelial cell development	1/30	17/18986	0.0588235	37.2275	5.94474	0.026536	0.247286	0.208666	ADD1	1
GO:1903140	regulation of establishment of endothelial barrier	1/30	17/18986	0.0588235	37.2275	5.94474	0.026536	0.247286	0.208666	ADD1	1
GO:0003159	morphogenesis of an endothelium	1/30	18/18986	0.0555556	35.1593	5.76802	0.0280756	0.247286	0.208666	CXCR4	1
GO:0043217	myelin maintenance	1/30	18/18986	0.0555556	35.1593	5.76802	0.0280756	0.247286	0.208666	CXCR4	1
GO:0061154	endothelial tube morphogenesis	1/30	18/18986	0.0555556	35.1593	5.76802	0.0280756	0.247286	0.208666	CXCR4	1
GO:0070230	positive regulation of lymphocyte apoptotic process	1/30	18/18986	0.0555556	35.1593	5.76802	0.0280756	0.247286	0.208666	BCL2L11	1
GO:0030307	positive regulation of cell growth	2/30	166/18986	0.0120482	7.6249	3.41048	0.0281618	0.247286	0.208666	PUM2/CXCR4	2
GO:0001829	trophectodermal cell differentiation	1/30	19/18986	0.0526316	33.3088	5.60519	0.0296128	0.247286	0.208666	SP3	1
GO:0002693	positive regulation of cellular extravasation	1/30	19/18986	0.0526316	33.3088	5.60519	0.0296128	0.247286	0.208666	CD47	1
GO:0008356	asymmetric cell division	1/30	19/18986	0.0526316	33.3088	5.60519	0.0296128	0.247286	0.208666	RAB10	1
GO:0061158	3'-UTR-mediated mRNA destabilization	1/30	19/18986	0.0526316	33.3088	5.60519	0.0296128	0.247286	0.208666	PUM2	1
GO:0048639	positive regulation of developmental growth	2/30	171/18986	0.0116959	7.40195	3.34542	0.0297446	0.247286	0.208666	PUM2/CXCR4	2
GO:0061351	neural precursor cell proliferation	2/30	171/18986	0.0116959	7.40195	3.34542	0.0297446	0.247286	0.208666	RERE/RAB10	2
GO:0043254	regulation of protein-containing complex assembly	3/30	433/18986	0.00692841	4.38476	2.83437	0.0303282	0.247286	0.208666	FAF1/BCL2L11/ADD1	3
GO:0051220	cytoplasmic sequestering of protein	1/30	20/18986	0.05	31.6433	5.45451	0.0311477	0.247286	0.208666	FAF1	1
GO:0060216	definitive hemopoiesis	1/30	20/18986	0.05	31.6433	5.45451	0.0311477	0.247286	0.208666	SP3	1
GO:1902905	positive regulation of supramolecular fiber organization	2/30	177/18986	0.0112994	7.15104	3.27073	0.0316901	0.247286	0.208666	CCDC88A/CD47	2
GO:0009048	dosage compensation by inactivation of X chromosome	1/30	21/18986	0.047619	30.1365	5.31451	0.0326802	0.247286	0.208666	SPEN	1
GO:0036498	IRE1-mediated unfolded protein response	1/30	21/18986	0.047619	30.1365	5.31451	0.0326802	0.247286	0.208666	BCL2L11	1
GO:0039535	regulation of RIG-I signaling pathway	1/30	21/18986	0.047619	30.1365	5.31451	0.0326802	0.247286	0.208666	PUM2	1
GO:0050965	detection of temperature stimulus involved in sensory perception of pain	1/30	21/18986	0.047619	30.1365	5.31451	0.0326802	0.247286	0.208666	CXCR4	1
GO:0070242	thymocyte apoptotic process	1/30	21/18986	0.047619	30.1365	5.31451	0.0326802	0.247286	0.208666	BCL2L11	1
GO:0071786	endoplasmic reticulum tubular network organization	1/30	21/18986	0.047619	30.1365	5.31451	0.0326802	0.247286	0.208666	RAB10	1
GO:0090200	positive regulation of release of cytochrome c from mitochondria	1/30	21/18986	0.047619	30.1365	5.31451	0.0326802	0.247286	0.208666	BCL2L11	1
GO:2000269	regulation of fibroblast apoptotic process	1/30	21/18986	0.047619	30.1365	5.31451	0.0326802	0.247286	0.208666	BCL2L11	1
GO:1903034	regulation of response to wounding	2/30	181/18986	0.0110497	6.993	3.22285	0.0330146	0.247286	0.208666	PUM2/CXCR4	2
GO:0022411	cellular component disassembly	3/30	450/18986	0.00666667	4.21911	2.74933	0.0334486	0.247286	0.208666	CTSS/RUBCN/ADD1	3
GO:0048732	gland development	3/30	450/18986	0.00666667	4.21911	2.74933	0.0334486	0.247286	0.208666	BCL2L11/SP3/EAF2	3
GO:0002262	myeloid cell homeostasis	2/30	183/18986	0.010929	6.91658	3.19945	0.033685	0.247286	0.208666	BCL2L11/SP3	2
GO:0048025	negative regulation of mRNA splicing, via spliceosome	1/30	22/18986	0.0454545	28.7667	5.18397	0.0342103	0.247286	0.208666	SRSF4	1
GO:0050765	negative regulation of phagocytosis	1/30	22/18986	0.0454545	28.7667	5.18397	0.0342103	0.247286	0.208666	CD47	1
GO:0051495	positive regulation of cytoskeleton organization	2/30	186/18986	0.0107527	6.80502	3.165	0.0347006	0.247286	0.208666	CCDC88A/CD47	2
GO:0007549	sex-chromosome dosage compensation	1/30	23/18986	0.0434783	27.5159	5.06186	0.0357382	0.247286	0.208666	SPEN	1
GO:0050686	negative regulation of mRNA processing	1/30	23/18986	0.0434783	27.5159	5.06186	0.0357382	0.247286	0.208666	SRSF4	1
GO:0007015	actin filament organization	3/30	465/18986	0.00645161	4.08301	2.6777	0.0363373	0.247286	0.208666	CCDC88A/CD47/ADD1	3
GO:0001779	natural killer cell differentiation	1/30	24/18986	0.0416667	26.3694	4.94729	0.0372637	0.247286	0.208666	SP3	1
GO:0002407	dendritic cell chemotaxis	1/30	24/18986	0.0416667	26.3694	4.94729	0.0372637	0.247286	0.208666	CXCR4	1
GO:0015867	ATP transport	1/30	24/18986	0.0416667	26.3694	4.94729	0.0372637	0.247286	0.208666	CD47	1
GO:0042659	regulation of cell fate specification	1/30	24/18986	0.0416667	26.3694	4.94729	0.0372637	0.247286	0.208666	GATAD2B	1
GO:0097066	response to thyroid hormone	1/30	24/18986	0.0416667	26.3694	4.94729	0.0372637	0.247286	0.208666	CTSS	1
GO:1903861	positive regulation of dendrite extension	1/30	24/18986	0.0416667	26.3694	4.94729	0.0372637	0.247286	0.208666	CXCR4	1
GO:0030859	polarized epithelial cell differentiation	1/30	25/18986	0.04	25.3147	4.8395	0.0387868	0.247286	0.208666	RAB10	1
GO:0050961	detection of temperature stimulus involved in sensory perception	1/30	25/18986	0.04	25.3147	4.8395	0.0387868	0.247286	0.208666	CXCR4	1
GO:0051016	barbed-end actin filament capping	1/30	25/18986	0.04	25.3147	4.8395	0.0387868	0.247286	0.208666	ADD1	1
GO:0061042	vascular wound healing	1/30	25/18986	0.04	25.3147	4.8395	0.0387868	0.247286	0.208666	CXCR4	1
GO:0071466	cellular response to xenobiotic stimulus	2/30	198/18986	0.010101	6.39259	3.03447	0.0388814	0.247286	0.208666	RNF149/CXCR4	2
GO:0031334	positive regulation of protein-containing complex assembly	2/30	200/18986	0.01	6.32867	3.01376	0.0395963	0.247286	0.208666	FAF1/BCL2L11	2
GO:0031048	regulatory ncRNA-mediated heterochromatin formation	1/30	26/18986	0.0384615	24.341	4.73784	0.0403076	0.247286	0.208666	SPEN	1
GO:0048596	embryonic camera-type eye morphogenesis	1/30	26/18986	0.0384615	24.341	4.73784	0.0403076	0.247286	0.208666	SP3	1
GO:0060561	apoptotic process involved in morphogenesis	1/30	26/18986	0.0384615	24.341	4.73784	0.0403076	0.247286	0.208666	BCL2L11	1
GO:0016049	cell growth	3/30	490/18986	0.00612245	3.87469	2.56474	0.0414319	0.247286	0.208666	PUM2/CXCR4/EAF2	3
GO:0010447	response to acidic pH	1/30	27/18986	0.037037	23.4395	4.64173	0.0418261	0.247286	0.208666	CTSS	1
GO:0033119	negative regulation of RNA splicing	1/30	27/18986	0.037037	23.4395	4.64173	0.0418261	0.247286	0.208666	SRSF4	1
GO:0044346	fibroblast apoptotic process	1/30	27/18986	0.037037	23.4395	4.64173	0.0418261	0.247286	0.208666	BCL2L11	1
GO:1903859	regulation of dendrite extension	1/30	27/18986	0.037037	23.4395	4.64173	0.0418261	0.247286	0.208666	CXCR4	1
GO:0016048	detection of temperature stimulus	1/30	28/18986	0.0357143	22.6024	4.55069	0.0433423	0.247286	0.208666	CXCR4	1
GO:0021680	cerebellar Purkinje cell layer development	1/30	28/18986	0.0357143	22.6024	4.55069	0.0433423	0.247286	0.208666	RERE	1
GO:0039529	RIG-I signaling pathway	1/30	28/18986	0.0357143	22.6024	4.55069	0.0433423	0.247286	0.208666	PUM2	1
GO:0048714	positive regulation of oligodendrocyte differentiation	1/30	28/18986	0.0357143	22.6024	4.55069	0.0433423	0.247286	0.208666	CXCR4	1
GO:2000819	regulation of nucleotide-excision repair	1/30	28/18986	0.0357143	22.6024	4.55069	0.0433423	0.247286	0.208666	PBRM1	1
GO:0045742	positive regulation of epidermal growth factor receptor signaling pathway	1/30	29/18986	0.0344828	21.823	4.46426	0.0448562	0.247493	0.20884	CCDC88A	1
GO:0031032	actomyosin structure organization	2/30	216/18986	0.00925926	5.85988	2.85767	0.0454937	0.247493	0.20884	CCDC88A/CD47	2
GO:0062149	detection of stimulus involved in sensory perception of pain	1/30	30/18986	0.0333333	21.0956	4.38208	0.0463677	0.247493	0.20884	CXCR4	1
GO:2000108	positive regulation of leukocyte apoptotic process	1/30	30/18986	0.0333333	21.0956	4.38208	0.0463677	0.247493	0.20884	BCL2L11	1
GO:0002064	epithelial cell development	2/30	219/18986	0.00913242	5.7796	2.83015	0.046634	0.247493	0.20884	CXCR4/ADD1	2
GO:0002431	Fc receptor mediated stimulatory signaling pathway	1/30	31/18986	0.0322581	20.4151	4.30378	0.047877	0.247493	0.20884	CD47	1
GO:0019886	antigen processing and presentation of exogenous peptide antigen via MHC class II	1/30	31/18986	0.0322581	20.4151	4.30378	0.047877	0.247493	0.20884	CTSS	1
GO:0036336	dendritic cell migration	1/30	31/18986	0.0322581	20.4151	4.30378	0.047877	0.247493	0.20884	CXCR4	1
GO:0045724	positive regulation of cilium assembly	1/30	31/18986	0.0322581	20.4151	4.30378	0.047877	0.247493	0.20884	CCDC88A	1
GO:0050951	sensory perception of temperature stimulus	1/30	31/18986	0.0322581	20.4151	4.30378	0.047877	0.247493	0.20884	CXCR4	1
GO:0060964	regulation of miRNA-mediated gene silencing	1/30	31/18986	0.0322581	20.4151	4.30378	0.047877	0.247493	0.20884	PUM2	1
GO:0065002	intracellular protein transmembrane transport	1/30	31/18986	0.0322581	20.4151	4.30378	0.047877	0.247493	0.20884	SEC62	1
GO:1901186	positive regulation of ERBB signaling pathway	1/30	31/18986	0.0322581	20.4151	4.30378	0.047877	0.247493	0.20884	CCDC88A	1
GO:0006613	cotranslational protein targeting to membrane	1/30	32/18986	0.03125	19.7771	4.22907	0.0493839	0.247493	0.20884	SEC62	1
GO:0048679	regulation of axon regeneration	1/30	32/18986	0.03125	19.7771	4.22907	0.0493839	0.247493	0.20884	PUM2	1
GO:1900101	regulation of endoplasmic reticulum unfolded protein response	1/30	32/18986	0.03125	19.7771	4.22907	0.0493839	0.247493	0.20884	BCL2L11	1
GO:1900368	regulation of post-transcriptional gene silencing by regulatory ncRNA	1/30	32/18986	0.03125	19.7771	4.22907	0.0493839	0.247493	0.20884	PUM2	1
GO:0060147	regulation of post-transcriptional gene silencing	1/30	33/18986	0.030303	19.1778	4.15768	0.0508885	0.247493	0.20884	PUM2	1
GO:0071674	mononuclear cell migration	2/30	231/18986	0.00865801	5.47937	2.72494	0.0512998	0.247493	0.20884	CXCR4/CD47	2
GO:0048588	developmental cell growth	2/30	232/18986	0.00862069	5.45575	2.7165	0.051696	0.247493	0.20884	PUM2/CXCR4	2
GO:0060055	angiogenesis involved in wound healing	1/30	34/18986	0.0294118	18.6137	4.08936	0.0523908	0.247493	0.20884	CXCR4	1
GO:0060966	regulation of gene silencing by regulatory ncRNA	1/30	34/18986	0.0294118	18.6137	4.08936	0.0523908	0.247493	0.20884	PUM2	1
GO:0070570	regulation of neuron projection regeneration	1/30	34/18986	0.0294118	18.6137	4.08936	0.0523908	0.247493	0.20884	PUM2	1
GO:1902235	regulation of endoplasmic reticulum stress-induced intrinsic apoptotic signaling pathway	1/30	34/18986	0.0294118	18.6137	4.08936	0.0523908	0.247493	0.20884	BCL2L11	1
GO:0097191	extrinsic apoptotic signaling pathway	2/30	236/18986	0.00847458	5.36328	2.68325	0.0532921	0.247493	0.20884	FAF1/BCL2L11	2
GO:0002495	antigen processing and presentation of peptide antigen via MHC class II	1/30	35/18986	0.0285714	18.0819	4.0239	0.0538908	0.247493	0.20884	CTSS	1
GO:0034063	stress granule assembly	1/30	35/18986	0.0285714	18.0819	4.0239	0.0538908	0.247493	0.20884	PUM2	1
GO:0048048	embryonic eye morphogenesis	1/30	35/18986	0.0285714	18.0819	4.0239	0.0538908	0.247493	0.20884	SP3	1
GO:0060560	developmental growth involved in morphogenesis	2/30	238/18986	0.00840336	5.31821	2.6669	0.0540968	0.247493	0.20884	PUM2/CXCR4	2
GO:0006909	phagocytosis	2/30	239/18986	0.0083682	5.29596	2.6588	0.0545008	0.247493	0.20884	CD47/RUBCN	2
GO:0001782	B cell homeostasis	1/30	36/18986	0.0277778	17.5796	3.96108	0.0553885	0.247493	0.20884	BCL2L11	1
GO:0015868	purine ribonucleotide transport	1/30	36/18986	0.0277778	17.5796	3.96108	0.0553885	0.247493	0.20884	CD47	1
GO:0030224	monocyte differentiation	1/30	36/18986	0.0277778	17.5796	3.96108	0.0553885	0.247493	0.20884	SP3	1
GO:0002504	antigen processing and presentation of peptide or polysaccharide antigen via MHC class II	1/30	37/18986	0.027027	17.1045	3.90075	0.056884	0.247493	0.20884	CTSS	1
GO:0016242	negative regulation of macroautophagy	1/30	37/18986	0.027027	17.1045	3.90075	0.056884	0.247493	0.20884	RUBCN	1
GO:0031076	embryonic camera-type eye development	1/30	37/18986	0.027027	17.1045	3.90075	0.056884	0.247493	0.20884	SP3	1
GO:0097484	dendrite extension	1/30	37/18986	0.027027	17.1045	3.90075	0.056884	0.247493	0.20884	CXCR4	1
GO:0050769	positive regulation of neurogenesis	2/30	247/18986	0.00809717	5.12443	2.59556	0.0577717	0.247493	0.20884	SPEN/CXCR4	2
GO:0070316	regulation of G0 to G1 transition	1/30	38/18986	0.0263158	16.6544	3.84272	0.0583771	0.247493	0.20884	PBRM1	1
GO:0071711	basement membrane organization	1/30	38/18986	0.0263158	16.6544	3.84272	0.0583771	0.247493	0.20884	CTSS	1
GO:0050974	detection of mechanical stimulus involved in sensory perception	1/30	39/18986	0.025641	16.2274	3.78686	0.059868	0.247493	0.20884	CXCR4	1
GO:0009268	response to pH	1/30	40/18986	0.025	15.8217	3.73302	0.0613565	0.247493	0.20884	CTSS	1
GO:0045023	G0 to G1 transition	1/30	40/18986	0.025	15.8217	3.73302	0.0613565	0.247493	0.20884	PBRM1	1
GO:0048536	spleen development	1/30	40/18986	0.025	15.8217	3.73302	0.0613565	0.247493	0.20884	BCL2L11	1
GO:0051503	adenine nucleotide transport	1/30	40/18986	0.025	15.8217	3.73302	0.0613565	0.247493	0.20884	CD47	1
GO:0051693	actin filament capping	1/30	40/18986	0.025	15.8217	3.73302	0.0613565	0.247493	0.20884	ADD1	1
GO:0090199	regulation of release of cytochrome c from mitochondria	1/30	40/18986	0.025	15.8217	3.73302	0.0613565	0.247493	0.20884	BCL2L11	1
GO:1902110	positive regulation of mitochondrial membrane permeability involved in apoptotic process	1/30	40/18986	0.025	15.8217	3.73302	0.0613565	0.247493	0.20884	BCL2L11	1
GO:1905898	positive regulation of response to endoplasmic reticulum stress	1/30	40/18986	0.025	15.8217	3.73302	0.0613565	0.247493	0.20884	BCL2L11	1
GO:0032984	protein-containing complex disassembly	2/30	258/18986	0.00775194	4.90594	2.51294	0.0623794	0.247493	0.20884	RUBCN/ADD1	2
GO:0045927	positive regulation of growth	2/30	259/18986	0.00772201	4.887	2.50567	0.0628044	0.247493	0.20884	PUM2/CXCR4	2
GO:0002478	antigen processing and presentation of exogenous peptide antigen	1/30	41/18986	0.0243902	15.4358	3.6811	0.0628428	0.247493	0.20884	CTSS	1
GO:0050870	positive regulation of T cell activation	2/30	260/18986	0.00769231	4.86821	2.49842	0.0632305	0.247493	0.20884	PBRM1/CD47	2
GO:0002691	regulation of cellular extravasation	1/30	42/18986	0.0238095	15.0683	3.63096	0.0643268	0.247493	0.20884	CD47	1
GO:0015865	purine nucleotide transport	1/30	42/18986	0.0238095	15.0683	3.63096	0.0643268	0.247493	0.20884	CD47	1
GO:0030851	granulocyte differentiation	1/30	42/18986	0.0238095	15.0683	3.63096	0.0643268	0.247493	0.20884	SP3	1
GO:0043001	Golgi to plasma membrane protein transport	1/30	42/18986	0.0238095	15.0683	3.63096	0.0643268	0.247493	0.20884	RAB10	1
GO:0070232	regulation of T cell apoptotic process	1/30	42/18986	0.0238095	15.0683	3.63096	0.0643268	0.247493	0.20884	BCL2L11	1
GO:1902686	mitochondrial outer membrane permeabilization involved in programmed cell death	1/30	42/18986	0.0238095	15.0683	3.63096	0.0643268	0.247493	0.20884	BCL2L11	1
GO:1902742	apoptotic process involved in development	1/30	42/18986	0.0238095	15.0683	3.63096	0.0643268	0.247493	0.20884	BCL2L11	1
GO:0045740	positive regulation of DNA replication	1/30	43/18986	0.0232558	14.7178	3.58251	0.0658086	0.247493	0.20884	FAF1	1
GO:0030835	negative regulation of actin filament depolymerization	1/30	44/18986	0.0227273	14.3833	3.53566	0.0672881	0.247493	0.20884	ADD1	1
GO:0035794	positive regulation of mitochondrial membrane permeability	1/30	44/18986	0.0227273	14.3833	3.53566	0.0672881	0.247493	0.20884	BCL2L11	1
GO:0150052	regulation of postsynapse assembly	1/30	44/18986	0.0227273	14.3833	3.53566	0.0672881	0.247493	0.20884	PUM2	1
GO:0001825	blastocyst formation	1/30	45/18986	0.0222222	14.0637	3.49031	0.0687653	0.247493	0.20884	SP3	1
GO:0030574	collagen catabolic process	1/30	45/18986	0.0222222	14.0637	3.49031	0.0687653	0.247493	0.20884	CTSS	1
GO:0035196	miRNA processing	1/30	45/18986	0.0222222	14.0637	3.49031	0.0687653	0.247493	0.20884	PUM2	1
GO:2001259	positive regulation of cation channel activity	1/30	45/18986	0.0222222	14.0637	3.49031	0.0687653	0.247493	0.20884	CTSS	1
GO:0032868	response to insulin	2/30	276/18986	0.00724638	4.58599	2.38737	0.0701813	0.247493	0.20884	SRSF4/RAB10	2
GO:0008038	neuron recognition	1/30	46/18986	0.0217391	13.758	3.44638	0.0702402	0.247493	0.20884	CXCR4	1
GO:0045047	protein targeting to ER	1/30	46/18986	0.0217391	13.758	3.44638	0.0702402	0.247493	0.20884	SEC62	1
GO:0045601	regulation of endothelial cell differentiation	1/30	46/18986	0.0217391	13.758	3.44638	0.0702402	0.247493	0.20884	ADD1	1
GO:0045663	positive regulation of myoblast differentiation	1/30	46/18986	0.0217391	13.758	3.44638	0.0702402	0.247493	0.20884	PBRM1	1
GO:0045687	positive regulation of glial cell differentiation	1/30	46/18986	0.0217391	13.758	3.44638	0.0702402	0.247493	0.20884	CXCR4	1
GO:0048713	regulation of oligodendrocyte differentiation	1/30	46/18986	0.0217391	13.758	3.44638	0.0702402	0.247493	0.20884	CXCR4	1
GO:0034976	response to endoplasmic reticulum stress	2/30	277/18986	0.00722022	4.56943	2.38071	0.0706239	0.247493	0.20884	FAF1/BCL2L11	2
GO:0002221	pattern recognition receptor signaling pathway	2/30	278/18986	0.00719424	4.553	2.37408	0.0710675	0.247493	0.20884	CTSS/PUM2	2
GO:0051896	regulation of phosphatidylinositol 3-kinase/protein kinase B signal transduction	2/30	280/18986	0.00714286	4.52048	2.36093	0.0719574	0.247493	0.20884	CCDC88A/RUBCN	2
GO:0090150	establishment of protein localization to membrane	2/30	280/18986	0.00714286	4.52048	2.36093	0.0719574	0.247493	0.20884	RAB10/SEC62	2
GO:0006862	nucleotide transport	1/30	48/18986	0.0208333	13.1847	3.3625	0.0731834	0.247493	0.20884	CD47	1
GO:0010453	regulation of cell fate commitment	1/30	48/18986	0.0208333	13.1847	3.3625	0.0731834	0.247493	0.20884	GATAD2B	1
GO:1902108	regulation of mitochondrial membrane permeability involved in apoptotic process	1/30	48/18986	0.0208333	13.1847	3.3625	0.0731834	0.247493	0.20884	BCL2L11	1
GO:0006260	DNA replication	2/30	283/18986	0.00706714	4.47256	2.34142	0.0732991	0.247493	0.20884	FAF1/ZBTB38	2
GO:0042113	B cell activation	2/30	284/18986	0.00704225	4.45681	2.33498	0.0737482	0.247493	0.20884	FCRL5/SP3	2
GO:1903039	positive regulation of leukocyte cell-cell adhesion	2/30	284/18986	0.00704225	4.45681	2.33498	0.0737482	0.247493	0.20884	PBRM1/CD47	2
GO:0030850	prostate gland development	1/30	49/18986	0.0204082	12.9156	3.32241	0.0746515	0.247493	0.20884	EAF2	1
GO:0032092	positive regulation of protein binding	1/30	49/18986	0.0204082	12.9156	3.32241	0.0746515	0.247493	0.20884	ADD1	1
GO:0043029	T cell homeostasis	1/30	49/18986	0.0204082	12.9156	3.32241	0.0746515	0.247493	0.20884	BCL2L11	1
GO:0048066	developmental pigmentation	1/30	49/18986	0.0204082	12.9156	3.32241	0.0746515	0.247493	0.20884	BCL2L11	1
GO:0061028	establishment of endothelial barrier	1/30	49/18986	0.0204082	12.9156	3.32241	0.0746515	0.247493	0.20884	ADD1	1
GO:0071985	multivesicular body sorting pathway	1/30	49/18986	0.0204082	12.9156	3.32241	0.0746515	0.247493	0.20884	RUBCN	1
GO:1902041	regulation of extrinsic apoptotic signaling pathway via death domain receptors	1/30	49/18986	0.0204082	12.9156	3.32241	0.0746515	0.247493	0.20884	FAF1	1
GO:1905710	positive regulation of membrane permeability	1/30	49/18986	0.0204082	12.9156	3.32241	0.0746515	0.247493	0.20884	BCL2L11	1
GO:0019884	antigen processing and presentation of exogenous antigen	1/30	50/18986	0.02	12.6573	3.28347	0.0761175	0.2501	0.21104	CTSS	1
GO:0048538	thymus development	1/30	50/18986	0.02	12.6573	3.28347	0.0761175	0.2501	0.21104	BCL2L11	1
GO:0051054	positive regulation of DNA metabolic process	2/30	295/18986	0.00677966	4.29062	2.26603	0.0787477	0.256051	0.216062	FAF1/PBRM1	2
GO:0072659	protein localization to plasma membrane	2/30	295/18986	0.00677966	4.29062	2.26603	0.0787477	0.256051	0.216062	RAB10/CCDC88A	2
GO:0002758	innate immune response-activating signaling pathway	2/30	297/18986	0.00673401	4.26173	2.25385	0.0796681	0.256051	0.216062	CTSS/PUM2	2
GO:0045165	cell fate commitment	2/30	297/18986	0.00673401	4.26173	2.25385	0.0796681	0.256051	0.216062	GATAD2B/RAB10	2
GO:0051962	positive regulation of nervous system development	2/30	297/18986	0.00673401	4.26173	2.25385	0.0796681	0.256051	0.216062	SPEN/CXCR4	2
GO:0021695	cerebellar cortex development	1/30	53/18986	0.0188679	11.9409	3.17302	0.0805018	0.256491	0.216432	RERE	1
GO:0030834	regulation of actin filament depolymerization	1/30	53/18986	0.0188679	11.9409	3.17302	0.0805018	0.256491	0.216432	ADD1	1
GO:0001738	morphogenesis of a polarized epithelium	1/30	54/18986	0.0185185	11.7198	3.13817	0.0819588	0.257785	0.217525	RAB10	1
GO:0001836	release of cytochrome c from mitochondria	1/30	54/18986	0.0185185	11.7198	3.13817	0.0819588	0.257785	0.217525	BCL2L11	1
GO:0031103	axon regeneration	1/30	54/18986	0.0185185	11.7198	3.13817	0.0819588	0.257785	0.217525	PUM2	1
GO:0071385	cellular response to glucocorticoid stimulus	1/30	55/18986	0.0181818	11.5067	3.10422	0.0834136	0.261244	0.220443	BCL2L11	1
GO:0030100	regulation of endocytosis	2/30	307/18986	0.00651466	4.12291	2.19454	0.0843217	0.262969	0.221899	CD47/RUBCN	2
GO:0048608	reproductive structure development	2/30	309/18986	0.00647249	4.09622	2.18298	0.0852624	0.263763	0.222569	BCL2L11/EAF2	2
GO:0050982	detection of mechanical stimulus	1/30	57/18986	0.0175439	11.1029	3.03888	0.0863164	0.263763	0.222569	CXCR4	1
GO:0061458	reproductive system development	2/30	313/18986	0.00638978	4.04388	2.16015	0.0871538	0.263763	0.222569	BCL2L11/EAF2	2
GO:0030042	actin filament depolymerization	1/30	58/18986	0.0172414	10.9115	3.00741	0.0877644	0.263763	0.222569	ADD1	1
GO:0034332	adherens junction organization	1/30	58/18986	0.0172414	10.9115	3.00741	0.0877644	0.263763	0.222569	ADD1	1
GO:2001238	positive regulation of extrinsic apoptotic signaling pathway	1/30	58/18986	0.0172414	10.9115	3.00741	0.0877644	0.263763	0.222569	FAF1	1
GO:0002218	activation of innate immune response	2/30	317/18986	0.00630915	3.99285	2.1377	0.089058	0.263763	0.222569	CTSS/PUM2	2
GO:0043491	phosphatidylinositol 3-kinase/protein kinase B signal transduction	2/30	317/18986	0.00630915	3.99285	2.1377	0.089058	0.263763	0.222569	CCDC88A/RUBCN	2
GO:0042733	embryonic digit morphogenesis	1/30	59/18986	0.0169492	10.7266	2.97671	0.0892103	0.263763	0.222569	BCL2L11	1
GO:0046902	regulation of mitochondrial membrane permeability	1/30	59/18986	0.0169492	10.7266	2.97671	0.0892103	0.263763	0.222569	BCL2L11	1
GO:0030217	T cell differentiation	2/30	320/18986	0.00625	3.95542	2.1211	0.0904945	0.263763	0.222569	SP3/PBRM1	2
GO:0001961	positive regulation of cytokine-mediated signaling pathway	1/30	61/18986	0.0163934	10.3749	2.91746	0.0920953	0.263763	0.222569	CXCR4	1
GO:0031102	neuron projection regeneration	1/30	61/18986	0.0163934	10.3749	2.91746	0.0920953	0.263763	0.222569	PUM2	1
GO:0032147	activation of protein kinase activity	1/30	61/18986	0.0163934	10.3749	2.91746	0.0920953	0.263763	0.222569	CCDC88A	1
GO:0060612	adipose tissue development	1/30	61/18986	0.0163934	10.3749	2.91746	0.0920953	0.263763	0.222569	PUM2	1
GO:0070228	regulation of lymphocyte apoptotic process	1/30	61/18986	0.0163934	10.3749	2.91746	0.0920953	0.263763	0.222569	BCL2L11	1
GO:0070231	T cell apoptotic process	1/30	61/18986	0.0163934	10.3749	2.91746	0.0920953	0.263763	0.222569	BCL2L11	1
GO:0022029	telencephalon cell migration	1/30	62/18986	0.016129	10.2075	2.88885	0.0935346	0.263763	0.222569	CXCR4	1
GO:0006919	activation of cysteine-type endopeptidase activity involved in apoptotic process	1/30	63/18986	0.015873	10.0455	2.86089	0.0949716	0.263763	0.222569	BCL2L11	1
GO:0034113	heterotypic cell-cell adhesion	1/30	63/18986	0.015873	10.0455	2.86089	0.0949716	0.263763	0.222569	CD47	1
GO:0097352	autophagosome maturation	1/30	63/18986	0.015873	10.0455	2.86089	0.0949716	0.263763	0.222569	RUBCN	1
GO:0021885	forebrain cell migration	1/30	65/18986	0.0153846	9.73641	2.80679	0.097839	0.263763	0.222569	CXCR4	1
GO:0022617	extracellular matrix disassembly	1/30	65/18986	0.0153846	9.73641	2.80679	0.097839	0.263763	0.222569	CTSS	1
GO:0030837	negative regulation of actin filament polymerization	1/30	65/18986	0.0153846	9.73641	2.80679	0.097839	0.263763	0.222569	ADD1	1
GO:0031122	cytoplasmic microtubule organization	1/30	65/18986	0.0153846	9.73641	2.80679	0.097839	0.263763	0.222569	CCDC88A	1
GO:0032615	interleukin-12 production	1/30	65/18986	0.0153846	9.73641	2.80679	0.097839	0.263763	0.222569	CD47	1
GO:0032655	regulation of interleukin-12 production	1/30	65/18986	0.0153846	9.73641	2.80679	0.097839	0.263763	0.222569	CD47	1
GO:0071384	cellular response to corticosteroid stimulus	1/30	65/18986	0.0153846	9.73641	2.80679	0.097839	0.263763	0.222569	BCL2L11	1
GO:0097192	extrinsic apoptotic signaling pathway in absence of ligand	1/30	65/18986	0.0153846	9.73641	2.80679	0.097839	0.263763	0.222569	BCL2L11	1
GO:2001244	positive regulation of intrinsic apoptotic signaling pathway	1/30	65/18986	0.0153846	9.73641	2.80679	0.097839	0.263763	0.222569	BCL2L11	1
GO:0022409	positive regulation of cell-cell adhesion	2/30	336/18986	0.00595238	3.76706	2.03583	0.0982724	0.263763	0.222569	PBRM1/CD47	2
GO:0051251	positive regulation of lymphocyte activation	2/30	336/18986	0.00595238	3.76706	2.03583	0.0982724	0.263763	0.222569	PBRM1/CD47	2
GO:0001655	urogenital system development	1/30	66/18986	0.0151515	9.58889	2.78062	0.0992694	0.263763	0.222569	EAF2	1
GO:0001885	endothelial cell development	1/30	66/18986	0.0151515	9.58889	2.78062	0.0992694	0.263763	0.222569	ADD1	1
GO:0006893	Golgi to plasma membrane transport	1/30	66/18986	0.0151515	9.58889	2.78062	0.0992694	0.263763	0.222569	RAB10	1
GO:0032613	interleukin-10 production	1/30	66/18986	0.0151515	9.58889	2.78062	0.0992694	0.263763	0.222569	CD47	1
GO:0032653	regulation of interleukin-10 production	1/30	66/18986	0.0151515	9.58889	2.78062	0.0992694	0.263763	0.222569	CD47	1
GO:0045428	regulation of nitric oxide biosynthetic process	1/30	66/18986	0.0151515	9.58889	2.78062	0.0992694	0.263763	0.222569	CD47	1
GO:0061951	establishment of protein localization to plasma membrane	1/30	66/18986	0.0151515	9.58889	2.78062	0.0992694	0.263763	0.222569	RAB10	1
GO:0070059	intrinsic apoptotic signaling pathway in response to endoplasmic reticulum stress	1/30	66/18986	0.0151515	9.58889	2.78062	0.0992694	0.263763	0.222569	BCL2L11	1
GO:0090303	positive regulation of wound healing	1/30	66/18986	0.0151515	9.58889	2.78062	0.0992694	0.263763	0.222569	CXCR4	1
GO:0048872	homeostasis of number of cells	2/30	339/18986	0.00589971	3.73373	2.02043	0.0997519	0.264091	0.222846	BCL2L11/SP3	2
GO:0030219	megakaryocyte differentiation	1/30	67/18986	0.0149254	9.44577	2.75499	0.100698	0.264658	0.223325	SP3	1
GO:0038034	signal transduction in absence of ligand	1/30	67/18986	0.0149254	9.44577	2.75499	0.100698	0.264658	0.223325	BCL2L11	1
GO:0032507	maintenance of protein location in cell	1/30	68/18986	0.0147059	9.30686	2.7299	0.102124	0.264658	0.223325	CCDC88A	1
GO:0042058	regulation of epidermal growth factor receptor signaling pathway	1/30	68/18986	0.0147059	9.30686	2.7299	0.102124	0.264658	0.223325	CCDC88A	1
GO:0060760	positive regulation of response to cytokine stimulus	1/30	68/18986	0.0147059	9.30686	2.7299	0.102124	0.264658	0.223325	CXCR4	1
GO:0080164	regulation of nitric oxide metabolic process	1/30	68/18986	0.0147059	9.30686	2.7299	0.102124	0.264658	0.223325	CD47	1
GO:0051235	maintenance of location	2/30	345/18986	0.0057971	3.66879	1.99013	0.10273	0.265296	0.223863	FAF1/CCDC88A	2
GO:0070918	regulatory ncRNA processing	1/30	69/18986	0.0144928	9.17198	2.70532	0.103547	0.266472	0.224855	PUM2	1
GO:0043525	positive regulation of neuron apoptotic process	1/30	70/18986	0.0142857	9.04095	2.68123	0.104969	0.269189	0.227148	BCL2L11	1
GO:0062208	positive regulation of pattern recognition receptor signaling pathway	1/30	71/18986	0.0140845	8.91362	2.65762	0.106389	0.270377	0.22815	PUM2	1
GO:0030032	lamellipodium assembly	1/30	72/18986	0.0138889	8.78981	2.63448	0.107806	0.270377	0.22815	CCDC88A	1
GO:0048002	antigen processing and presentation of peptide antigen	1/30	72/18986	0.0138889	8.78981	2.63448	0.107806	0.270377	0.22815	CTSS	1
GO:0050766	positive regulation of phagocytosis	1/30	73/18986	0.0136986	8.66941	2.61177	0.109221	0.270377	0.22815	CD47	1
GO:0051898	negative regulation of phosphatidylinositol 3-kinase/protein kinase B signal transduction	1/30	73/18986	0.0136986	8.66941	2.61177	0.109221	0.270377	0.22815	RUBCN	1
GO:0006887	exocytosis	2/30	360/18986	0.00555556	3.51593	1.91726	0.110284	0.270377	0.22815	SYTL1/RAB10	2
GO:0014015	positive regulation of gliogenesis	1/30	74/18986	0.0135135	8.55225	2.5895	0.110634	0.270377	0.22815	CXCR4	1
GO:0071806	protein transmembrane transport	1/30	74/18986	0.0135135	8.55225	2.5895	0.110634	0.270377	0.22815	SEC62	1
GO:1901880	negative regulation of protein depolymerization	1/30	74/18986	0.0135135	8.55225	2.5895	0.110634	0.270377	0.22815	ADD1	1
GO:0032535	regulation of cellular component size	2/30	361/18986	0.00554017	3.50619	1.91254	0.110793	0.270377	0.22815	PUM2/ADD1	2
GO:1990778	protein localization to cell periphery	2/30	362/18986	0.00552486	3.4965	1.90784	0.111303	0.270377	0.22815	RAB10/CCDC88A	2
GO:0031346	positive regulation of cell projection organization	2/30	363/18986	0.00550964	3.48687	1.90315	0.111813	0.270377	0.22815	PUM2/CCDC88A	2
GO:0032414	positive regulation of ion transmembrane transporter activity	1/30	75/18986	0.0133333	8.43822	2.56765	0.112045	0.270377	0.22815	CTSS	1
GO:0045123	cellular extravasation	1/30	75/18986	0.0133333	8.43822	2.56765	0.112045	0.270377	0.22815	CD47	1
GO:0061512	protein localization to cilium	1/30	75/18986	0.0133333	8.43822	2.56765	0.112045	0.270377	0.22815	CCDC88A	1
GO:0090559	regulation of membrane permeability	1/30	75/18986	0.0133333	8.43822	2.56765	0.112045	0.270377	0.22815	BCL2L11	1
GO:1901184	regulation of ERBB signaling pathway	1/30	75/18986	0.0133333	8.43822	2.56765	0.112045	0.270377	0.22815	CCDC88A	1
GO:1902017	regulation of cilium assembly	1/30	75/18986	0.0133333	8.43822	2.56765	0.112045	0.270377	0.22815	CCDC88A	1
GO:0045661	regulation of myoblast differentiation	1/30	76/18986	0.0131579	8.32719	2.54619	0.113453	0.271993	0.229513	PBRM1	1
GO:2000242	negative regulation of reproductive process	1/30	76/18986	0.0131579	8.32719	2.54619	0.113453	0.271993	0.229513	EAF2	1
GO:0002696	positive regulation of leukocyte activation	2/30	371/18986	0.00539084	3.41168	1.86624	0.115917	0.276927	0.233677	PBRM1/CD47	2
GO:0071277	cellular response to calcium ion	1/30	78/18986	0.0128205	8.11368	2.50444	0.116264	0.276927	0.233677	ADD1	1
GO:0032272	negative regulation of protein polymerization	1/30	80/18986	0.0125	7.91083	2.46416	0.119066	0.281778	0.23777	ADD1	1
GO:0045685	regulation of glial cell differentiation	1/30	80/18986	0.0125	7.91083	2.46416	0.119066	0.281778	0.23777	CXCR4	1
GO:0002260	lymphocyte homeostasis	1/30	81/18986	0.0123457	7.81317	2.44453	0.120464	0.282362	0.238263	BCL2L11	1
GO:0006809	nitric oxide biosynthetic process	1/30	81/18986	0.0123457	7.81317	2.44453	0.120464	0.282362	0.238263	CD47	1
GO:0032088	negative regulation of NF-kappaB transcription factor activity	1/30	81/18986	0.0123457	7.81317	2.44453	0.120464	0.282362	0.238263	FAF1	1
GO:0002224	toll-like receptor signaling pathway	1/30	82/18986	0.0121951	7.71789	2.42524	0.12186	0.283144	0.238923	CTSS	1
GO:0014823	response to activity	1/30	82/18986	0.0121951	7.71789	2.42524	0.12186	0.283144	0.238923	CXCR4	1
GO:0050767	regulation of neurogenesis	2/30	383/18986	0.00522193	3.30479	1.81272	0.122148	0.283144	0.238923	SPEN/CXCR4	2
GO:0006289	nucleotide-excision repair	1/30	83/18986	0.0120482	7.6249	2.40628	0.123254	0.283144	0.238923	PBRM1	1
GO:0007405	neuroblast proliferation	1/30	83/18986	0.0120482	7.6249	2.40628	0.123254	0.283144	0.238923	RAB10	1
GO:0019233	sensory perception of pain	1/30	83/18986	0.0120482	7.6249	2.40628	0.123254	0.283144	0.238923	CXCR4	1
GO:0045089	positive regulation of innate immune response	2/30	387/18986	0.00516796	3.27063	1.79535	0.124243	0.283144	0.238923	CTSS/PUM2	2
GO:0032411	positive regulation of transporter activity	1/30	84/18986	0.0119048	7.53413	2.38762	0.124645	0.283144	0.238923	CTSS	1
GO:0070227	lymphocyte apoptotic process	1/30	84/18986	0.0119048	7.53413	2.38762	0.124645	0.283144	0.238923	BCL2L11	1
GO:2000736	regulation of stem cell differentiation	1/30	84/18986	0.0119048	7.53413	2.38762	0.124645	0.283144	0.238923	GATAD2B	1
GO:0030968	endoplasmic reticulum unfolded protein response	1/30	85/18986	0.0117647	7.44549	2.36928	0.126034	0.284189	0.239804	BCL2L11	1
GO:0050867	positive regulation of cell activation	2/30	391/18986	0.00511509	3.23717	1.7782	0.126348	0.284189	0.239804	PBRM1/CD47	2
GO:1903037	regulation of leukocyte cell-cell adhesion	2/30	392/18986	0.00510204	3.22891	1.77395	0.126875	0.284189	0.239804	PBRM1/CD47	2
GO:0050863	regulation of T cell activation	2/30	393/18986	0.00508906	3.2207	1.76971	0.127403	0.284189	0.239804	PBRM1/CD47	2
GO:0006446	regulation of translational initiation	1/30	86/18986	0.0116279	7.35891	2.35122	0.127422	0.284189	0.239804	EIF4G3	1
GO:0048678	response to axon injury	1/30	86/18986	0.0116279	7.35891	2.35122	0.127422	0.284189	0.239804	PUM2	1
GO:0001892	embryonic placenta development	1/30	87/18986	0.0114943	7.27433	2.33346	0.128807	0.28469	0.240227	SP3	1
GO:0008625	extrinsic apoptotic signaling pathway via death domain receptors	1/30	87/18986	0.0114943	7.27433	2.33346	0.128807	0.28469	0.240227	FAF1	1
GO:0099068	postsynapse assembly	1/30	87/18986	0.0114943	7.27433	2.33346	0.128807	0.28469	0.240227	PUM2	1
GO:0034243	regulation of transcription elongation by RNA polymerase II	1/30	88/18986	0.0113636	7.19167	2.31597	0.130189	0.285177	0.240638	EAF2	1
GO:0071347	cellular response to interleukin-1	1/30	88/18986	0.0113636	7.19167	2.31597	0.130189	0.285177	0.240638	CD47	1
GO:1905897	regulation of response to endoplasmic reticulum stress	1/30	88/18986	0.0113636	7.19167	2.31597	0.130189	0.285177	0.240638	BCL2L11	1
GO:0009791	post-embryonic development	1/30	89/18986	0.011236	7.11086	2.29876	0.13157	0.285651	0.241039	BCL2L11	1
GO:0046209	nitric oxide metabolic process	1/30	89/18986	0.011236	7.11086	2.29876	0.13157	0.285651	0.241039	CD47	1
GO:1902117	positive regulation of organelle assembly	1/30	89/18986	0.011236	7.11086	2.29876	0.13157	0.285651	0.241039	CCDC88A	1
GO:0001701	in utero embryonic development	2/30	403/18986	0.00496278	3.14078	1.72806	0.132714	0.286561	0.241806	BCL2L11/SP3	2
GO:1901264	carbohydrate derivative transport	1/30	90/18986	0.0111111	7.03185	2.28181	0.132949	0.286561	0.241806	CD47	1
GO:0050900	leukocyte migration	2/30	404/18986	0.0049505	3.133	1.72397	0.133248	0.286561	0.241806	CXCR4/CD47	2
GO:1903311	regulation of mRNA metabolic process	2/30	406/18986	0.00492611	3.11757	1.71582	0.134317	0.286561	0.241806	SRSF4/PUM2	2
GO:0097581	lamellipodium organization	1/30	91/18986	0.010989	6.95458	2.26512	0.134326	0.286561	0.241806	CCDC88A	1
GO:2001057	reactive nitrogen species metabolic process	1/30	91/18986	0.010989	6.95458	2.26512	0.134326	0.286561	0.241806	CD47	1
GO:1901879	regulation of protein depolymerization	1/30	92/18986	0.0108696	6.87899	2.24868	0.1357	0.288657	0.243575	ADD1	1
GO:0030071	regulation of mitotic metaphase/anaphase transition	1/30	93/18986	0.0107527	6.80502	2.23248	0.137072	0.289069	0.243923	PBRM1	1
GO:0070098	chemokine-mediated signaling pathway	1/30	93/18986	0.0107527	6.80502	2.23248	0.137072	0.289069	0.243923	CXCR4	1
GO:2000106	regulation of leukocyte apoptotic process	1/30	93/18986	0.0107527	6.80502	2.23248	0.137072	0.289069	0.243923	BCL2L11	1
GO:0042475	odontogenesis of dentin-containing tooth	1/30	94/18986	0.0106383	6.73262	2.21652	0.138443	0.289471	0.244262	BCL2L11	1
GO:0071677	positive regulation of mononuclear cell migration	1/30	94/18986	0.0106383	6.73262	2.21652	0.138443	0.289471	0.244262	CD47	1
GO:2000781	positive regulation of double-strand break repair	1/30	94/18986	0.0106383	6.73262	2.21652	0.138443	0.289471	0.244262	PBRM1	1
GO:0002833	positive regulation of response to biotic stimulus	2/30	416/18986	0.00480769	3.04263	1.6758	0.139695	0.291263	0.245774	CTSS/PUM2	2
GO:0001942	hair follicle development	1/30	96/18986	0.0104167	6.59236	2.18528	0.141177	0.291871	0.246287	PUM2	1
GO:0010507	negative regulation of autophagy	1/30	96/18986	0.0104167	6.59236	2.18528	0.141177	0.291871	0.246287	RUBCN	1
GO:1902099	regulation of metaphase/anaphase transition of cell cycle	1/30	96/18986	0.0104167	6.59236	2.18528	0.141177	0.291871	0.246287	PBRM1	1
GO:0007091	metaphase/anaphase transition of mitotic cell cycle	1/30	97/18986	0.0103093	6.5244	2.17	0.142541	0.293083	0.24731	PBRM1	1
GO:0071346	cellular response to type II interferon	1/30	98/18986	0.0102041	6.45782	2.15492	0.143902	0.293083	0.24731	CD47	1
GO:0030098	lymphocyte differentiation	2/30	426/18986	0.00469484	2.97121	1.63697	0.145122	0.293083	0.24731	SP3/PBRM1	2
GO:0022404	molting cycle process	1/30	99/18986	0.010101	6.39259	2.14006	0.145262	0.293083	0.24731	PUM2	1
GO:0022405	hair cycle process	1/30	99/18986	0.010101	6.39259	2.14006	0.145262	0.293083	0.24731	PUM2	1
GO:0034620	cellular response to unfolded protein	1/30	99/18986	0.010101	6.39259	2.14006	0.145262	0.293083	0.24731	BCL2L11	1
GO:0043280	positive regulation of cysteine-type endopeptidase activity involved in apoptotic process	1/30	99/18986	0.010101	6.39259	2.14006	0.145262	0.293083	0.24731	BCL2L11	1
GO:0061387	regulation of extent of cell growth	1/30	99/18986	0.010101	6.39259	2.14006	0.145262	0.293083	0.24731	PUM2	1
GO:0007029	endoplasmic reticulum organization	1/30	100/18986	0.01	6.32867	2.1254	0.14662	0.293083	0.24731	RAB10	1
GO:0032784	regulation of DNA-templated transcription elongation	1/30	100/18986	0.01	6.32867	2.1254	0.14662	0.293083	0.24731	EAF2	1
GO:0044784	metaphase/anaphase transition of cell cycle	1/30	100/18986	0.01	6.32867	2.1254	0.14662	0.293083	0.24731	PBRM1	1
GO:0007059	chromosome segregation	2/30	429/18986	0.004662	2.95043	1.62554	0.146759	0.293083	0.24731	PUM2/PBRM1	2
GO:0007159	leukocyte cell-cell adhesion	2/30	430/18986	0.00465116	2.94357	1.62175	0.147305	0.293083	0.24731	PBRM1/CD47	2
GO:0120162	positive regulation of cold-induced thermogenesis	1/30	101/18986	0.00990099	6.26601	2.11094	0.147975	0.293083	0.24731	CXCR4	1
GO:0030101	natural killer cell activation	1/30	102/18986	0.00980392	6.20458	2.09667	0.149329	0.293083	0.24731	SP3	1
GO:0048534	hematopoietic or lymphoid organ development	1/30	102/18986	0.00980392	6.20458	2.09667	0.149329	0.293083	0.24731	BCL2L11	1
GO:0050764	regulation of phagocytosis	1/30	102/18986	0.00980392	6.20458	2.09667	0.149329	0.293083	0.24731	CD47	1
GO:1990868	response to chemokine	1/30	102/18986	0.00980392	6.20458	2.09667	0.149329	0.293083	0.24731	CXCR4	1
GO:1990869	cellular response to chemokine	1/30	102/18986	0.00980392	6.20458	2.09667	0.149329	0.293083	0.24731	CXCR4	1
GO:0046620	regulation of organ growth	1/30	103/18986	0.00970874	6.14434	2.0826	0.15068	0.294166	0.248224	BCL2L11	1
GO:1903312	negative regulation of mRNA metabolic process	1/30	103/18986	0.00970874	6.14434	2.0826	0.15068	0.294166	0.248224	SRSF4	1
GO:0008630	intrinsic apoptotic signaling pathway in response to DNA damage	1/30	106/18986	0.00943396	5.97044	2.04145	0.154722	0.300901	0.253907	BCL2L11	1
GO:0051099	positive regulation of binding	1/30	107/18986	0.00934579	5.91464	2.02809	0.156065	0.300901	0.253907	ADD1	1
GO:0043434	response to peptide hormone	2/30	446/18986	0.0044843	2.83797	1.56258	0.156109	0.300901	0.253907	SRSF4/RAB10	2
GO:0008637	apoptotic mitochondrial changes	1/30	108/18986	0.00925926	5.85988	2.01489	0.157406	0.300901	0.253907	BCL2L11	1
GO:0033045	regulation of sister chromatid segregation	1/30	108/18986	0.00925926	5.85988	2.01489	0.157406	0.300901	0.253907	PBRM1	1
GO:2001257	regulation of cation channel activity	1/30	108/18986	0.00925926	5.85988	2.01489	0.157406	0.300901	0.253907	CTSS	1
GO:0021549	cerebellum development	1/30	109/18986	0.00917431	5.80612	2.00186	0.158745	0.300901	0.253907	RERE	1
GO:0009410	response to xenobiotic stimulus	2/30	451/18986	0.00443459	2.8065	1.54463	0.158882	0.300901	0.253907	RNF149/CXCR4	2
GO:0007005	mitochondrion organization	2/30	452/18986	0.00442478	2.80029	1.54106	0.159438	0.300901	0.253907	PUM2/BCL2L11	2
GO:0010975	regulation of neuron projection development	2/30	452/18986	0.00442478	2.80029	1.54106	0.159438	0.300901	0.253907	PUM2/CCDC88A	2
GO:0001708	cell fate specification	1/30	110/18986	0.00909091	5.75333	1.98899	0.160082	0.300901	0.253907	GATAD2B	1
GO:0048709	oligodendrocyte differentiation	1/30	110/18986	0.00909091	5.75333	1.98899	0.160082	0.300901	0.253907	CXCR4	1
GO:0006892	post-Golgi vesicle-mediated transport	1/30	111/18986	0.00900901	5.7015	1.97627	0.161417	0.300901	0.253907	RAB10	1
GO:0007229	integrin-mediated signaling pathway	1/30	111/18986	0.00900901	5.7015	1.97627	0.161417	0.300901	0.253907	CD47	1
GO:0032963	collagen metabolic process	1/30	111/18986	0.00900901	5.7015	1.97627	0.161417	0.300901	0.253907	CTSS	1
GO:0014013	regulation of gliogenesis	1/30	112/18986	0.00892857	5.6506	1.96371	0.16275	0.300901	0.253907	CXCR4	1
GO:0001776	leukocyte homeostasis	1/30	113/18986	0.00884956	5.60059	1.9513	0.164081	0.300901	0.253907	BCL2L11	1
GO:0036503	ERAD pathway	1/30	113/18986	0.00884956	5.60059	1.9513	0.164081	0.300901	0.253907	FAF1	1
GO:0120034	positive regulation of plasma membrane bounded cell projection assembly	1/30	113/18986	0.00884956	5.60059	1.9513	0.164081	0.300901	0.253907	CCDC88A	1
GO:0006417	regulation of translation	2/30	461/18986	0.00433839	2.74563	1.50944	0.164458	0.300901	0.253907	EIF4G3/PUM2	2
GO:0072594	establishment of protein localization to organelle	2/30	462/18986	0.004329	2.73968	1.50597	0.165017	0.300901	0.253907	RAB10/SEC62	2
GO:0007173	epidermal growth factor receptor signaling pathway	1/30	114/18986	0.00877193	5.55146	1.93904	0.16541	0.300901	0.253907	CCDC88A	1
GO:0010821	regulation of mitochondrion organization	1/30	114/18986	0.00877193	5.55146	1.93904	0.16541	0.300901	0.253907	BCL2L11	1
GO:0035967	cellular response to topologically incorrect protein	1/30	114/18986	0.00877193	5.55146	1.93904	0.16541	0.300901	0.253907	BCL2L11	1
GO:0043473	pigmentation	1/30	114/18986	0.00877193	5.55146	1.93904	0.16541	0.300901	0.253907	BCL2L11	1
GO:0048024	regulation of mRNA splicing, via spliceosome	1/30	114/18986	0.00877193	5.55146	1.93904	0.16541	0.300901	0.253907	SRSF4	1
GO:2001056	positive regulation of cysteine-type endopeptidase activity	1/30	114/18986	0.00877193	5.55146	1.93904	0.16541	0.300901	0.253907	BCL2L11	1
GO:0051960	regulation of nervous system development	2/30	463/18986	0.00431965	2.73377	1.50251	0.165577	0.300901	0.253907	SPEN/CXCR4	2
GO:0045445	myoblast differentiation	1/30	115/18986	0.00869565	5.50319	1.92692	0.166736	0.302261	0.255054	PBRM1	1
GO:0051051	negative regulation of transport	2/30	467/18986	0.00428266	2.71035	1.48877	0.167821	0.302428	0.255195	CD47/RUBCN	2
GO:0043393	regulation of protein binding	1/30	116/18986	0.00862069	5.45575	1.91494	0.168061	0.302428	0.255195	ADD1	1
GO:0070555	response to interleukin-1	1/30	116/18986	0.00862069	5.45575	1.91494	0.168061	0.302428	0.255195	CD47	1
GO:0045088	regulation of innate immune response	2/30	470/18986	0.00425532	2.69305	1.47856	0.169507	0.304286	0.256763	CTSS/PUM2	2
GO:0001824	blastocyst development	1/30	118/18986	0.00847458	5.36328	1.8914	0.170704	0.305689	0.257947	SP3	1
GO:0022037	metencephalon development	1/30	119/18986	0.00840336	5.31821	1.87983	0.172023	0.306899	0.258968	RERE	1
GO:0007006	mitochondrial membrane organization	1/30	120/18986	0.00833333	5.27389	1.86839	0.173339	0.306899	0.258968	BCL2L11	1
GO:0042303	molting cycle	1/30	120/18986	0.00833333	5.27389	1.86839	0.173339	0.306899	0.258968	PUM2	1
GO:0042633	hair cycle	1/30	120/18986	0.00833333	5.27389	1.86839	0.173339	0.306899	0.258968	PUM2	1
GO:0034341	response to type II interferon	1/30	121/18986	0.00826446	5.2303	1.85707	0.174654	0.306899	0.258968	CD47	1
GO:0043269	regulation of monoatomic ion transport	2/30	480/18986	0.00416667	2.63694	1.44508	0.17515	0.306899	0.258968	CTSS/CXCR4	2
GO:0031330	negative regulation of cellular catabolic process	1/30	122/18986	0.00819672	5.18743	1.84588	0.175966	0.306899	0.258968	RUBCN	1
GO:0039531	regulation of cytoplasmic pattern recognition receptor signaling pathway	1/30	122/18986	0.00819672	5.18743	1.84588	0.175966	0.306899	0.258968	PUM2	1
GO:0045582	positive regulation of T cell differentiation	1/30	122/18986	0.00819672	5.18743	1.84588	0.175966	0.306899	0.258968	PBRM1	1
GO:0051261	protein depolymerization	1/30	122/18986	0.00819672	5.18743	1.84588	0.175966	0.306899	0.258968	ADD1	1
GO:0071887	leukocyte apoptotic process	1/30	122/18986	0.00819672	5.18743	1.84588	0.175966	0.306899	0.258968	BCL2L11	1
GO:0030326	embryonic limb morphogenesis	1/30	123/18986	0.00813008	5.14526	1.83481	0.177277	0.307244	0.259259	BCL2L11	1
GO:0035113	embryonic appendage morphogenesis	1/30	123/18986	0.00813008	5.14526	1.83481	0.177277	0.307244	0.259259	BCL2L11	1
GO:0008380	RNA splicing	2/30	484/18986	0.00413223	2.61515	1.43192	0.177417	0.307244	0.259259	SRSF4/ZRANB2	2
GO:0032609	type II interferon production	1/30	124/18986	0.00806452	5.10376	1.82386	0.178585	0.307819	0.259745	CD47	1
GO:0032649	regulation of type II interferon production	1/30	124/18986	0.00806452	5.10376	1.82386	0.178585	0.307819	0.259745	CD47	1
GO:0022904	respiratory electron transport chain	1/30	125/18986	0.008	5.06293	1.81303	0.179892	0.309347	0.261033	PUM2	1
GO:0006413	translational initiation	1/30	127/18986	0.00787402	4.9832	1.79171	0.182499	0.313098	0.264199	EIF4G3	1
GO:0006612	protein targeting to membrane	1/30	129/18986	0.00775194	4.90594	1.77083	0.185098	0.316818	0.267338	SEC62	1
GO:0045785	positive regulation of cell adhesion	2/30	499/18986	0.00400802	2.53654	1.38374	0.18596	0.317556	0.26796	PBRM1/CD47	2
GO:0002009	morphogenesis of an epithelium	2/30	500/18986	0.004	2.53147	1.38059	0.186532	0.317795	0.268162	RAB10/CXCR4	2
GO:0007127	meiosis I	1/30	132/18986	0.00757576	4.79444	1.74031	0.188981	0.320484	0.270431	BCL2L11	1
GO:0098773	skin epidermis development	1/30	132/18986	0.00757576	4.79444	1.74031	0.188981	0.320484	0.270431	PUM2	1
GO:0048706	embryonic skeletal system development	1/30	134/18986	0.00746269	4.72289	1.72047	0.19156	0.321755	0.271504	SP3	1
GO:0051384	response to glucocorticoid	1/30	134/18986	0.00746269	4.72289	1.72047	0.19156	0.321755	0.271504	BCL2L11	1
GO:0002244	hematopoietic progenitor cell differentiation	1/30	135/18986	0.00740741	4.6879	1.71069	0.192846	0.321755	0.271504	SP3	1
GO:0022900	electron transport chain	1/30	135/18986	0.00740741	4.6879	1.71069	0.192846	0.321755	0.271504	PUM2	1
GO:0030833	regulation of actin filament polymerization	1/30	135/18986	0.00740741	4.6879	1.71069	0.192846	0.321755	0.271504	ADD1	1
GO:0030879	mammary gland development	1/30	136/18986	0.00735294	4.65343	1.70101	0.194131	0.321755	0.271504	BCL2L11	1
GO:0038127	ERBB signaling pathway	1/30	136/18986	0.00735294	4.65343	1.70101	0.194131	0.321755	0.271504	CCDC88A	1
GO:0042476	odontogenesis	1/30	136/18986	0.00735294	4.65343	1.70101	0.194131	0.321755	0.271504	BCL2L11	1
GO:0048593	camera-type eye morphogenesis	1/30	136/18986	0.00735294	4.65343	1.70101	0.194131	0.321755	0.271504	SP3	1
GO:0050684	regulation of mRNA processing	1/30	136/18986	0.00735294	4.65343	1.70101	0.194131	0.321755	0.271504	SRSF4	1
GO:0010950	positive regulation of endopeptidase activity	1/30	137/18986	0.00729927	4.61946	1.69143	0.195414	0.321755	0.271504	BCL2L11	1
GO:0045621	positive regulation of lymphocyte differentiation	1/30	137/18986	0.00729927	4.61946	1.69143	0.195414	0.321755	0.271504	PBRM1	1
GO:0051592	response to calcium ion	1/30	137/18986	0.00729927	4.61946	1.69143	0.195414	0.321755	0.271504	ADD1	1
GO:0045739	positive regulation of DNA repair	1/30	138/18986	0.00724638	4.58599	1.68193	0.196694	0.323077	0.27262	PBRM1	1
GO:0030183	B cell differentiation	1/30	139/18986	0.00719424	4.553	1.67253	0.197973	0.323077	0.27262	SP3	1
GO:0030218	erythrocyte differentiation	1/30	139/18986	0.00719424	4.553	1.67253	0.197973	0.323077	0.27262	SP3	1
GO:0045727	positive regulation of translation	1/30	139/18986	0.00719424	4.553	1.67253	0.197973	0.323077	0.27262	EIF4G3	1
GO:0061041	regulation of wound healing	1/30	140/18986	0.00714286	4.52048	1.66322	0.199249	0.323725	0.273166	CXCR4	1
GO:0061982	meiosis I cell cycle process	1/30	140/18986	0.00714286	4.52048	1.66322	0.199249	0.323725	0.273166	BCL2L11	1
GO:0035148	tube formation	1/30	142/18986	0.00704225	4.45681	1.64485	0.201797	0.327142	0.276049	BCL2L11	1
GO:0006986	response to unfolded protein	1/30	143/18986	0.00699301	4.42564	1.63579	0.203067	0.32765	0.276478	BCL2L11	1
GO:0048813	dendrite morphogenesis	1/30	143/18986	0.00699301	4.42564	1.63579	0.203067	0.32765	0.276478	RERE	1
GO:0009581	detection of external stimulus	1/30	144/18986	0.00694444	4.39491	1.62682	0.204336	0.32765	0.276478	CXCR4	1
GO:0043281	regulation of cysteine-type endopeptidase activity involved in apoptotic process	1/30	144/18986	0.00694444	4.39491	1.62682	0.204336	0.32765	0.276478	BCL2L11	1
GO:1904064	positive regulation of cation transmembrane transport	1/30	144/18986	0.00694444	4.39491	1.62682	0.204336	0.32765	0.276478	CTSS	1
GO:0050921	positive regulation of chemotaxis	1/30	145/18986	0.00689655	4.3646	1.61792	0.205603	0.328251	0.276986	CXCR4	1
GO:2000779	regulation of double-strand break repair	1/30	145/18986	0.00689655	4.3646	1.61792	0.205603	0.328251	0.276986	PBRM1	1
GO:0009582	detection of abiotic stimulus	1/30	146/18986	0.00684932	4.3347	1.60911	0.206868	0.328722	0.277383	CXCR4	1
GO:0001889	liver development	1/30	147/18986	0.00680272	4.30522	1.60038	0.208131	0.328722	0.277383	SP3	1
GO:0010952	positive regulation of peptidase activity	1/30	147/18986	0.00680272	4.30522	1.60038	0.208131	0.328722	0.277383	BCL2L11	1
GO:0060048	cardiac muscle contraction	1/30	147/18986	0.00680272	4.30522	1.60038	0.208131	0.328722	0.277383	CXCR4	1
GO:0071675	regulation of mononuclear cell migration	1/30	147/18986	0.00680272	4.30522	1.60038	0.208131	0.328722	0.277383	CD47	1
GO:0034101	erythrocyte homeostasis	1/30	150/18986	0.00666667	4.21911	1.57463	0.211908	0.33084	0.27917	SP3	1
GO:0061008	hepaticobiliary system development	1/30	150/18986	0.00666667	4.21911	1.57463	0.211908	0.33084	0.27917	SP3	1
GO:0099175	regulation of postsynapse organization	1/30	150/18986	0.00666667	4.21911	1.57463	0.211908	0.33084	0.27917	PUM2	1
GO:0008584	male gonad development	1/30	151/18986	0.00662252	4.19117	1.5662	0.213163	0.33084	0.27917	BCL2L11	1
GO:0035107	appendage morphogenesis	1/30	151/18986	0.00662252	4.19117	1.5662	0.213163	0.33084	0.27917	BCL2L11	1
GO:0035108	limb morphogenesis	1/30	151/18986	0.00662252	4.19117	1.5662	0.213163	0.33084	0.27917	BCL2L11	1
GO:0120161	regulation of cold-induced thermogenesis	1/30	151/18986	0.00662252	4.19117	1.5662	0.213163	0.33084	0.27917	CXCR4	1
GO:0001890	placenta development	1/30	152/18986	0.00657895	4.1636	1.55784	0.214417	0.33084	0.27917	SP3	1
GO:0002687	positive regulation of leukocyte migration	1/30	152/18986	0.00657895	4.1636	1.55784	0.214417	0.33084	0.27917	CD47	1
GO:0031333	negative regulation of protein-containing complex assembly	1/30	152/18986	0.00657895	4.1636	1.55784	0.214417	0.33084	0.27917	ADD1	1
GO:0046546	development of primary male sexual characteristics	1/30	152/18986	0.00657895	4.1636	1.55784	0.214417	0.33084	0.27917	BCL2L11	1
GO:0008064	regulation of actin polymerization or depolymerization	1/30	153/18986	0.00653595	4.13638	1.54956	0.215668	0.331381	0.279627	ADD1	1
GO:0106106	cold-induced thermogenesis	1/30	153/18986	0.00653595	4.13638	1.54956	0.215668	0.331381	0.279627	CXCR4	1
GO:0008037	cell recognition	1/30	156/18986	0.00641026	4.05684	1.52511	0.21941	0.335033	0.282708	CXCR4	1
GO:0030832	regulation of actin filament length	1/30	156/18986	0.00641026	4.05684	1.52511	0.21941	0.335033	0.282708	ADD1	1
GO:0031960	response to corticosteroid	1/30	156/18986	0.00641026	4.05684	1.52511	0.21941	0.335033	0.282708	BCL2L11	1
GO:0034767	positive regulation of monoatomic ion transmembrane transport	1/30	157/18986	0.00636943	4.031	1.5171	0.220654	0.33554	0.283136	CTSS	1
GO:0098876	vesicle-mediated transport to the plasma membrane	1/30	157/18986	0.00636943	4.031	1.5171	0.220654	0.33554	0.283136	RAB10	1
GO:0042552	myelination	1/30	158/18986	0.00632911	4.00549	1.50915	0.221896	0.33604	0.283557	CXCR4	1
GO:0043433	negative regulation of DNA-binding transcription factor activity	1/30	158/18986	0.00632911	4.00549	1.50915	0.221896	0.33604	0.283557	FAF1	1
GO:0045807	positive regulation of endocytosis	1/30	159/18986	0.00628931	3.98029	1.50127	0.223136	0.336332	0.283804	CD47	1
GO:0046718	symbiont entry into host cell	1/30	159/18986	0.00628931	3.98029	1.50127	0.223136	0.336332	0.283804	CXCR4	1
GO:0007272	ensheathment of neurons	1/30	160/18986	0.00625	3.95542	1.49346	0.224373	0.336332	0.283804	CXCR4	1
GO:0008366	axon ensheathment	1/30	160/18986	0.00625	3.95542	1.49346	0.224373	0.336332	0.283804	CXCR4	1
GO:0035966	response to topologically incorrect protein	1/30	160/18986	0.00625	3.95542	1.49346	0.224373	0.336332	0.283804	BCL2L11	1
GO:0031507	heterochromatin formation	1/30	161/18986	0.00621118	3.93085	1.4857	0.225609	0.337497	0.284787	SPEN	1
GO:0030902	hindbrain development	1/30	162/18986	0.00617284	3.90658	1.47801	0.226844	0.337969	0.285186	RERE	1
GO:0050729	positive regulation of inflammatory response	1/30	162/18986	0.00617284	3.90658	1.47801	0.226844	0.337969	0.285186	CD47	1
GO:0010976	positive regulation of neuron projection development	1/30	164/18986	0.00609756	3.85894	1.46281	0.229306	0.338894	0.285966	PUM2	1
GO:0030010	establishment of cell polarity	1/30	164/18986	0.00609756	3.85894	1.46281	0.229306	0.338894	0.285966	RAB10	1
GO:0044409	symbiont entry into host	1/30	164/18986	0.00609756	3.85894	1.46281	0.229306	0.338894	0.285966	CXCR4	1
GO:2001236	regulation of extrinsic apoptotic signaling pathway	1/30	164/18986	0.00609756	3.85894	1.46281	0.229306	0.338894	0.285966	FAF1	1
GO:0030041	actin filament polymerization	1/30	167/18986	0.00598802	3.78962	1.44045	0.232985	0.34227	0.288815	ADD1	1
GO:0048592	eye morphogenesis	1/30	167/18986	0.00598802	3.78962	1.44045	0.232985	0.34227	0.288815	SP3	1
GO:2000116	regulation of cysteine-type endopeptidase activity	1/30	167/18986	0.00598802	3.78962	1.44045	0.232985	0.34227	0.288815	BCL2L11	1
GO:0051494	negative regulation of cytoskeleton organization	1/30	168/18986	0.00595238	3.76706	1.43311	0.234208	0.342698	0.289176	ADD1	1
GO:0051963	regulation of synapse assembly	1/30	168/18986	0.00595238	3.76706	1.43311	0.234208	0.342698	0.289176	PUM2	1
GO:1990138	neuron projection extension	1/30	169/18986	0.00591716	3.74477	1.42583	0.235429	0.343801	0.290107	CXCR4	1
GO:0007204	positive regulation of cytosolic calcium ion concentration	1/30	170/18986	0.00588235	3.72275	1.4186	0.236648	0.344215	0.290456	CXCR4	1
GO:1990845	adaptive thermogenesis	1/30	170/18986	0.00588235	3.72275	1.4186	0.236648	0.344215	0.290456	CXCR4	1
GO:0030856	regulation of epithelial cell differentiation	1/30	172/18986	0.00581395	3.67946	1.40431	0.23908	0.344749	0.290906	ADD1	1
GO:0043409	negative regulation of MAPK cascade	1/30	172/18986	0.00581395	3.67946	1.40431	0.23908	0.344749	0.290906	RNF149	1
GO:0007009	plasma membrane organization	1/30	173/18986	0.00578035	3.65819	1.39724	0.240294	0.344749	0.290906	CXCR4	1
GO:0015748	organophosphate ester transport	1/30	173/18986	0.00578035	3.65819	1.39724	0.240294	0.344749	0.290906	CD47	1
GO:0030308	negative regulation of cell growth	1/30	173/18986	0.00578035	3.65819	1.39724	0.240294	0.344749	0.290906	EAF2	1
GO:0050792	regulation of viral process	1/30	173/18986	0.00578035	3.65819	1.39724	0.240294	0.344749	0.290906	CXCR4	1
GO:1902904	negative regulation of supramolecular fiber organization	1/30	173/18986	0.00578035	3.65819	1.39724	0.240294	0.344749	0.290906	ADD1	1
GO:0007338	single fertilization	1/30	175/18986	0.00571429	3.61638	1.38327	0.242715	0.346198	0.292129	FCRL5	1
GO:0046661	male sex differentiation	1/30	175/18986	0.00571429	3.61638	1.38327	0.242715	0.346198	0.292129	BCL2L11	1
GO:0050680	negative regulation of epithelial cell proliferation	1/30	175/18986	0.00571429	3.61638	1.38327	0.242715	0.346198	0.292129	EAF2	1
GO:0009266	response to temperature stimulus	1/30	176/18986	0.00568182	3.59583	1.37636	0.243922	0.347247	0.293015	CXCR4	1
GO:0032635	interleukin-6 production	1/30	177/18986	0.00564972	3.57552	1.3695	0.245128	0.347619	0.293329	CD47	1
GO:0032675	regulation of interleukin-6 production	1/30	177/18986	0.00564972	3.57552	1.3695	0.245128	0.347619	0.293329	CD47	1
GO:0002753	cytoplasmic pattern recognition receptor signaling pathway	1/30	178/18986	0.00561798	3.55543	1.36268	0.246332	0.347986	0.293638	PUM2	1
GO:0031929	TOR signaling	1/30	178/18986	0.00561798	3.55543	1.36268	0.246332	0.347986	0.293638	CCDC88A	1
GO:0008361	regulation of cell size	1/30	179/18986	0.00558659	3.53557	1.35592	0.247534	0.349014	0.294506	PUM2	1
GO:0035265	organ growth	1/30	181/18986	0.00552486	3.4965	1.34254	0.249933	0.351722	0.296791	BCL2L11	1
GO:0071248	cellular response to metal ion	1/30	183/18986	0.00546448	3.45829	1.32934	0.252325	0.35441	0.299059	ADD1	1
GO:0062207	regulation of pattern recognition receptor signaling pathway	1/30	184/18986	0.00543478	3.43949	1.32281	0.253517	0.354941	0.299507	PUM2	1
GO:0001659	temperature homeostasis	1/30	185/18986	0.00540541	3.4209	1.31633	0.254708	0.354941	0.299507	CXCR4	1
GO:0001959	regulation of cytokine-mediated signaling pathway	1/30	187/18986	0.00534759	3.38431	1.3035	0.257085	0.354941	0.299507	CXCR4	1
GO:0007219	Notch signaling pathway	1/30	187/18986	0.00534759	3.38431	1.3035	0.257085	0.354941	0.299507	SPEN	1
GO:0006839	mitochondrial transport	1/30	188/18986	0.00531915	3.36631	1.29714	0.258271	0.354941	0.299507	BCL2L11	1
GO:0032412	regulation of monoatomic ion transmembrane transporter activity	1/30	188/18986	0.00531915	3.36631	1.29714	0.258271	0.354941	0.299507	CTSS	1
GO:0032640	tumor necrosis factor production	1/30	188/18986	0.00531915	3.36631	1.29714	0.258271	0.354941	0.299507	CD47	1
GO:0032680	regulation of tumor necrosis factor production	1/30	188/18986	0.00531915	3.36631	1.29714	0.258271	0.354941	0.299507	CD47	1
GO:0001764	neuron migration	1/30	189/18986	0.00529101	3.3485	1.29083	0.259454	0.354941	0.299507	CXCR4	1
GO:0007565	female pregnancy	1/30	189/18986	0.00529101	3.3485	1.29083	0.259454	0.354941	0.299507	SP3	1
GO:0045766	positive regulation of angiogenesis	1/30	189/18986	0.00529101	3.3485	1.29083	0.259454	0.354941	0.299507	CXCR4	1
GO:0048736	appendage development	1/30	189/18986	0.00529101	3.3485	1.29083	0.259454	0.354941	0.299507	BCL2L11	1
GO:0060173	limb development	1/30	189/18986	0.00529101	3.3485	1.29083	0.259454	0.354941	0.299507	BCL2L11	1
GO:2001242	regulation of intrinsic apoptotic signaling pathway	1/30	189/18986	0.00529101	3.3485	1.29083	0.259454	0.354941	0.299507	BCL2L11	1
GO:0043484	regulation of RNA splicing	1/30	190/18986	0.00526316	3.33088	1.28456	0.260636	0.355163	0.299695	SRSF4	1
GO:0016241	regulation of macroautophagy	1/30	191/18986	0.0052356	3.31344	1.27834	0.261816	0.355163	0.299695	RUBCN	1
GO:0045580	regulation of T cell differentiation	1/30	191/18986	0.0052356	3.31344	1.27834	0.261816	0.355163	0.299695	PBRM1	1
GO:2000045	regulation of G1/S transition of mitotic cell cycle	1/30	191/18986	0.0052356	3.31344	1.27834	0.261816	0.355163	0.299695	PBRM1	1
GO:0045814	negative regulation of gene expression, epigenetic	1/30	192/18986	0.00520833	3.29618	1.27215	0.262995	0.355163	0.299695	SPEN	1
GO:0051897	positive regulation of phosphatidylinositol 3-kinase/protein kinase B signal transduction	1/30	192/18986	0.00520833	3.29618	1.27215	0.262995	0.355163	0.299695	CCDC88A	1
GO:1904018	positive regulation of vasculature development	1/30	192/18986	0.00520833	3.29618	1.27215	0.262995	0.355163	0.299695	CXCR4	1
GO:0071706	tumor necrosis factor superfamily cytokine production	1/30	193/18986	0.00518135	3.2791	1.26601	0.264171	0.355448	0.299935	CD47	1
GO:1903555	regulation of tumor necrosis factor superfamily cytokine production	1/30	193/18986	0.00518135	3.2791	1.26601	0.264171	0.355448	0.299935	CD47	1
GO:0006941	striated muscle contraction	1/30	194/18986	0.00515464	3.2622	1.25991	0.265346	0.355728	0.300171	CXCR4	1
GO:0061157	mRNA destabilization	1/30	194/18986	0.00515464	3.2622	1.25991	0.265346	0.355728	0.300171	PUM2	1
GO:1902107	positive regulation of leukocyte differentiation	1/30	195/18986	0.00512821	3.24547	1.25384	0.266519	0.356003	0.300403	PBRM1	1
GO:1903708	positive regulation of hemopoiesis	1/30	195/18986	0.00512821	3.24547	1.25384	0.266519	0.356003	0.300403	PBRM1	1
GO:0008154	actin polymerization or depolymerization	1/30	196/18986	0.00510204	3.22891	1.24781	0.26769	0.356274	0.300632	ADD1	1
GO:0050954	sensory perception of mechanical stimulus	1/30	196/18986	0.00510204	3.22891	1.24781	0.26769	0.356274	0.300632	CXCR4	1
GO:0022898	regulation of transmembrane transporter activity	1/30	197/18986	0.00507614	3.21252	1.24183	0.268859	0.357184	0.3014	CTSS	1
GO:0030324	lung development	1/30	198/18986	0.00505051	3.1963	1.23588	0.270026	0.357445	0.30162	SP3	1
GO:0050779	RNA destabilization	1/30	198/18986	0.00505051	3.1963	1.23588	0.270026	0.357445	0.30162	PUM2	1
GO:0060759	regulation of response to cytokine stimulus	1/30	199/18986	0.00502513	3.18023	1.22997	0.271192	0.357701	0.301836	CXCR4	1
GO:0061014	positive regulation of mRNA catabolic process	1/30	199/18986	0.00502513	3.18023	1.22997	0.271192	0.357701	0.301836	PUM2	1
GO:0140013	meiotic nuclear division	1/30	200/18986	0.005	3.16433	1.22409	0.272356	0.358593	0.302589	BCL2L11	1
GO:0002520	immune system development	1/30	202/18986	0.0049505	3.133	1.21246	0.274678	0.360362	0.304081	BCL2L11	1
GO:0030323	respiratory tube development	1/30	202/18986	0.0049505	3.133	1.21246	0.274678	0.360362	0.304081	SP3	1
GO:0006403	RNA localization	1/30	204/18986	0.00490196	3.10229	1.20096	0.276993	0.361466	0.305013	PUM2	1
GO:0031099	regeneration	1/30	204/18986	0.00490196	3.10229	1.20096	0.276993	0.361466	0.305013	PUM2	1
GO:0051701	biological process involved in interaction with host	1/30	204/18986	0.00490196	3.10229	1.20096	0.276993	0.361466	0.305013	CXCR4	1
GO:0120032	regulation of plasma membrane bounded cell projection assembly	1/30	205/18986	0.00487805	3.08715	1.19527	0.278148	0.36233	0.305742	CCDC88A	1
GO:0001763	morphogenesis of a branching structure	1/30	207/18986	0.00483092	3.05733	1.18398	0.280452	0.362764	0.306108	RERE	1
GO:0032271	regulation of protein polymerization	1/30	207/18986	0.00483092	3.05733	1.18398	0.280452	0.362764	0.306108	ADD1	1
GO:0060491	regulation of cell projection assembly	1/30	207/18986	0.00483092	3.05733	1.18398	0.280452	0.362764	0.306108	CCDC88A	1
GO:2000241	regulation of reproductive process	1/30	207/18986	0.00483092	3.05733	1.18398	0.280452	0.362764	0.306108	EAF2	1
GO:0030705	cytoskeleton-dependent intracellular transport	1/30	208/18986	0.00480769	3.04263	1.17839	0.281602	0.363612	0.306823	CCDC88A	1
GO:0044703	multi-organism reproductive process	1/30	210/18986	0.0047619	3.01365	1.16731	0.283895	0.365931	0.308781	SP3	1
GO:0032869	cellular response to insulin stimulus	1/30	213/18986	0.00469484	2.97121	1.15093	0.287322	0.368413	0.310875	RAB10	1
GO:0045732	positive regulation of protein catabolic process	1/30	213/18986	0.00469484	2.97121	1.15093	0.287322	0.368413	0.310875	FAF1	1
GO:0071383	cellular response to steroid hormone stimulus	1/30	213/18986	0.00469484	2.97121	1.15093	0.287322	0.368413	0.310875	BCL2L11	1
GO:0043270	positive regulation of monoatomic ion transport	1/30	215/18986	0.00465116	2.94357	1.14016	0.289598	0.370208	0.312389	CTSS	1
GO:0009566	fertilization	1/30	216/18986	0.00462963	2.92994	1.13483	0.290734	0.370208	0.312389	FCRL5	1
GO:0034764	positive regulation of transmembrane transport	1/30	216/18986	0.00462963	2.92994	1.13483	0.290734	0.370208	0.312389	CTSS	1
GO:0050920	regulation of chemotaxis	1/30	216/18986	0.00462963	2.92994	1.13483	0.290734	0.370208	0.312389	CXCR4	1
GO:0044706	multi-multicellular organism process	1/30	218/18986	0.00458716	2.90306	1.12425	0.292999	0.371806	0.313738	SP3	1
GO:0045216	cell-cell junction organization	1/30	218/18986	0.00458716	2.90306	1.12425	0.292999	0.371806	0.313738	ADD1	1
GO:0051098	regulation of binding	1/30	219/18986	0.00456621	2.8898	1.11901	0.294129	0.372598	0.314406	ADD1	1
GO:1902806	regulation of cell cycle G1/S phase transition	1/30	220/18986	0.00454545	2.87667	1.11379	0.295258	0.373384	0.31507	PBRM1	1
GO:0009612	response to mechanical stimulus	1/30	222/18986	0.0045045	2.85075	1.10345	0.297509	0.374943	0.316385	CXCR4	1
GO:1903046	meiotic cell cycle process	1/30	222/18986	0.0045045	2.85075	1.10345	0.297509	0.374943	0.316385	BCL2L11	1
GO:0045619	regulation of lymphocyte differentiation	1/30	223/18986	0.0044843	2.83797	1.09833	0.298632	0.375715	0.317037	PBRM1	1
GO:0051651	maintenance of location in cell	1/30	224/18986	0.00446429	2.8253	1.09323	0.299754	0.376483	0.317684	CCDC88A	1
GO:0032409	regulation of transporter activity	1/30	225/18986	0.00444444	2.81274	1.08816	0.300874	0.376604	0.317786	CTSS	1
GO:0060541	respiratory system development	1/30	225/18986	0.00444444	2.81274	1.08816	0.300874	0.376604	0.317786	SP3	1
GO:0006282	regulation of DNA repair	1/30	227/18986	0.00440529	2.78796	1.0781	0.303108	0.378114	0.319061	PBRM1	1
GO:0007163	establishment or maintenance of cell polarity	1/30	227/18986	0.00440529	2.78796	1.0781	0.303108	0.378114	0.319061	RAB10	1
GO:0043583	ear development	1/30	229/18986	0.00436681	2.76361	1.06815	0.305335	0.379606	0.320319	BCL2L11	1
GO:0045055	regulated exocytosis	1/30	229/18986	0.00436681	2.76361	1.06815	0.305335	0.379606	0.320319	RAB10	1
GO:0007286	spermatid development	1/30	232/18986	0.00431034	2.72787	1.05342	0.308663	0.382451	0.32272	EIF4G3	1
GO:0045926	negative regulation of growth	1/30	232/18986	0.00431034	2.72787	1.05342	0.308663	0.382451	0.32272	EAF2	1
GO:1902115	regulation of organelle assembly	1/30	234/18986	0.0042735	2.70456	1.04373	0.310873	0.38404	0.324061	CCDC88A	1
GO:0000819	sister chromatid segregation	1/30	235/18986	0.00425532	2.69305	1.03892	0.311976	0.38404	0.324061	PBRM1	1
GO:0019722	calcium-mediated signaling	1/30	235/18986	0.00425532	2.69305	1.03892	0.311976	0.38404	0.324061	CXCR4	1
GO:0002685	regulation of leukocyte migration	1/30	236/18986	0.00423729	2.68164	1.03414	0.313076	0.38404	0.324061	CD47	1
GO:0008406	gonad development	1/30	236/18986	0.00423729	2.68164	1.03414	0.313076	0.38404	0.324061	BCL2L11	1
GO:1903313	positive regulation of mRNA metabolic process	1/30	236/18986	0.00423729	2.68164	1.03414	0.313076	0.38404	0.324061	PUM2	1
GO:0015931	nucleobase-containing compound transport	1/30	239/18986	0.0041841	2.64798	1.01995	0.316368	0.386789	0.326381	CD47	1
GO:0016358	dendrite development	1/30	239/18986	0.0041841	2.64798	1.01995	0.316368	0.386789	0.326381	RERE	1
GO:0030595	leukocyte chemotaxis	1/30	240/18986	0.00416667	2.63694	1.01526	0.317462	0.386842	0.326425	CXCR4	1
GO:0048515	spermatid differentiation	1/30	240/18986	0.00416667	2.63694	1.01526	0.317462	0.386842	0.326425	EIF4G3	1
GO:0007160	cell-matrix adhesion	1/30	241/18986	0.00414938	2.626	1.0106	0.318555	0.386892	0.326467	BCL2L11	1
GO:0045137	development of primary sexual characteristics	1/30	241/18986	0.00414938	2.626	1.0106	0.318555	0.386892	0.326467	BCL2L11	1
GO:0045860	positive regulation of protein kinase activity	1/30	243/18986	0.00411523	2.60439	1.00135	0.320734	0.388257	0.32762	CCDC88A	1
GO:0097529	myeloid leukocyte migration	1/30	243/18986	0.00411523	2.60439	1.00135	0.320734	0.388257	0.32762	CD47	1
GO:0016485	protein processing	1/30	246/18986	0.00406504	2.57263	0.987647	0.323991	0.390914	0.329861	CTSS	1
GO:0099173	postsynapse organization	1/30	246/18986	0.00406504	2.57263	0.987647	0.323991	0.390914	0.329861	PUM2	1
GO:0002573	myeloid leukocyte differentiation	1/30	247/18986	0.00404858	2.56221	0.983124	0.325073	0.391577	0.330421	SP3	1
GO:0022604	regulation of cell morphogenesis	1/30	248/18986	0.00403226	2.55188	0.978623	0.326154	0.391597	0.330438	CXCR4	1
GO:0052548	regulation of endopeptidase activity	1/30	248/18986	0.00403226	2.55188	0.978623	0.326154	0.391597	0.330438	BCL2L11	1
GO:0045333	cellular respiration	1/30	249/18986	0.00401606	2.54163	0.974144	0.327232	0.392253	0.330991	PUM2	1
GO:0048863	stem cell differentiation	1/30	251/18986	0.00398406	2.52138	0.965252	0.329385	0.394191	0.332627	GATAD2B	1
GO:0060047	heart contraction	1/30	253/18986	0.00395257	2.50145	0.956445	0.331531	0.396115	0.33425	CXCR4	1
GO:0043523	regulation of neuron apoptotic process	1/30	254/18986	0.00393701	2.4916	0.952073	0.332602	0.39675	0.334786	BCL2L11	1
GO:0000082	G1/S transition of mitotic cell cycle	1/30	256/18986	0.00390625	2.47214	0.94339	0.334738	0.398652	0.336391	PBRM1	1
GO:0033044	regulation of chromosome organization	1/30	258/18986	0.00387597	2.45297	0.93479	0.336867	0.39925	0.336896	PBRM1	1
GO:0033674	positive regulation of kinase activity	1/30	258/18986	0.00387597	2.45297	0.93479	0.336867	0.39925	0.336896	CCDC88A	1
GO:0051924	regulation of calcium ion transport	1/30	258/18986	0.00387597	2.45297	0.93479	0.336867	0.39925	0.336896	CXCR4	1
GO:0003015	heart process	1/30	262/18986	0.00381679	2.41552	0.917826	0.341106	0.403624	0.340587	CXCR4	1
GO:0010001	glial cell differentiation	1/30	267/18986	0.00374532	2.37029	0.897054	0.346369	0.409193	0.345286	CXCR4	1
GO:1901888	regulation of cell junction assembly	1/30	268/18986	0.00373134	2.36144	0.892955	0.347416	0.409773	0.345775	PUM2	1
GO:0007416	synapse assembly	1/30	269/18986	0.00371747	2.35266	0.888875	0.348462	0.410349	0.346261	PUM2	1
GO:0043488	regulation of mRNA stability	1/30	273/18986	0.003663	2.31819	0.872733	0.352629	0.414593	0.349843	PUM2	1
GO:0071695	anatomical structure maturation	1/30	276/18986	0.00362319	2.293	0.86081	0.355738	0.417581	0.352364	RERE	1
GO:0021537	telencephalon development	1/30	281/18986	0.00355872	2.25219	0.841276	0.360887	0.422951	0.356895	CXCR4	1
GO:0043487	regulation of RNA stability	1/30	285/18986	0.00350877	2.22058	0.825944	0.364978	0.426387	0.359794	PUM2	1
GO:0090596	sensory organ morphogenesis	1/30	285/18986	0.00350877	2.22058	0.825944	0.364978	0.426387	0.359794	SP3	1
GO:0044843	cell cycle G1/S phase transition	1/30	287/18986	0.00348432	2.20511	0.818373	0.367014	0.428086	0.361228	PBRM1	1
GO:0061013	regulation of mRNA catabolic process	1/30	289/18986	0.00346021	2.18985	0.810864	0.369043	0.429772	0.362651	PUM2	1
GO:0061448	connective tissue development	1/30	290/18986	0.00344828	2.1823	0.807132	0.370056	0.43027	0.363071	PUM2	1
GO:0007548	sex differentiation	1/30	292/18986	0.00342466	2.16735	0.799714	0.372076	0.431936	0.364477	BCL2L11	1
GO:0051258	protein polymerization	1/30	293/18986	0.00341297	2.15995	0.796027	0.373083	0.432424	0.364889	ADD1	1
GO:0016197	endosomal transport	1/30	294/18986	0.00340136	2.15261	0.792355	0.37409	0.43271	0.36513	RAB10	1
GO:0040029	epigenetic regulation of gene expression	1/30	295/18986	0.00338983	2.14531	0.788698	0.375094	0.43271	0.36513	SPEN	1
GO:0051321	meiotic cell cycle	1/30	295/18986	0.00338983	2.14531	0.788698	0.375094	0.43271	0.36513	BCL2L11	1
GO:0048562	embryonic organ morphogenesis	1/30	300/18986	0.00333333	2.10956	0.770627	0.380094	0.437792	0.369418	SP3	1
GO:0051347	positive regulation of transferase activity	1/30	304/18986	0.00328947	2.0818	0.756422	0.384065	0.441675	0.372695	CCDC88A	1
GO:0051402	neuron apoptotic process	1/30	307/18986	0.00325733	2.06145	0.74591	0.387028	0.444388	0.374984	BCL2L11	1
GO:0048193	Golgi vesicle transport	1/30	308/18986	0.00324675	2.05476	0.742433	0.388012	0.444824	0.375352	RAB10	1
GO:0050807	regulation of synapse organization	1/30	312/18986	0.00320513	2.02842	0.728654	0.391935	0.448622	0.378557	PUM2	1
GO:0001666	response to hypoxia	1/30	317/18986	0.00315457	1.99642	0.711715	0.396804	0.453191	0.382412	CXCR4	1
GO:0050803	regulation of synapse structure or activity	1/30	318/18986	0.00314465	1.99015	0.708365	0.397774	0.453191	0.382412	PUM2	1
GO:1904062	regulation of monoatomic cation transmembrane transport	1/30	318/18986	0.00314465	1.99015	0.708365	0.397774	0.453191	0.382412	CTSS	1
GO:0071375	cellular response to peptide hormone stimulus	1/30	321/18986	0.00311526	1.97155	0.698385	0.400672	0.454852	0.383814	RAB10	1
GO:0001822	kidney development	1/30	322/18986	0.00310559	1.96542	0.695083	0.401636	0.454852	0.383814	BCL2L11	1
GO:0044403	biological process involved in symbiotic interaction	1/30	322/18986	0.00310559	1.96542	0.695083	0.401636	0.454852	0.383814	CXCR4	1
GO:0006302	double-strand break repair	1/30	323/18986	0.00309598	1.95934	0.691792	0.402598	0.454852	0.383814	PBRM1	1
GO:0019058	viral life cycle	1/30	323/18986	0.00309598	1.95934	0.691792	0.402598	0.454852	0.383814	CXCR4	1
GO:0043588	skin development	1/30	324/18986	0.00308642	1.95329	0.688513	0.403558	0.454852	0.383814	PUM2	1
GO:0098813	nuclear chromosome segregation	1/30	324/18986	0.00308642	1.95329	0.688513	0.403558	0.454852	0.383814	PBRM1	1
GO:0045862	positive regulation of proteolysis	1/30	325/18986	0.00307692	1.94728	0.685245	0.404517	0.455236	0.384138	BCL2L11	1
GO:0097193	intrinsic apoptotic signaling pathway	1/30	327/18986	0.0030581	1.93537	0.678745	0.40643	0.456691	0.385365	BCL2L11	1
GO:0060326	cell chemotaxis	1/30	328/18986	0.00304878	1.92947	0.675512	0.407384	0.457065	0.385681	CXCR4	1
GO:0036293	response to decreased oxygen levels	1/30	331/18986	0.00302115	1.91198	0.66588	0.410238	0.458172	0.386615	CXCR4	1
GO:0051345	positive regulation of hydrolase activity	1/30	331/18986	0.00302115	1.91198	0.66588	0.410238	0.458172	0.386615	BCL2L11	1
GO:0060562	epithelial tube morphogenesis	1/30	331/18986	0.00302115	1.91198	0.66588	0.410238	0.458172	0.386615	CXCR4	1
GO:0072001	renal system development	1/30	332/18986	0.00301205	1.90622	0.662692	0.411187	0.458535	0.386922	BCL2L11	1
GO:0006605	protein targeting	1/30	335/18986	0.00298507	1.88915	0.653192	0.414023	0.461	0.389002	SEC62	1
GO:0002429	immune response-activating cell surface receptor signaling pathway	1/30	336/18986	0.00297619	1.88353	0.650047	0.414966	0.461346	0.389293	CD47	1
GO:1902105	regulation of leukocyte differentiation	1/30	337/18986	0.00296736	1.87794	0.646913	0.415907	0.461346	0.389293	PBRM1	1
GO:0000377	RNA splicing, via transesterification reactions with bulged adenosine as nucleophile	1/30	338/18986	0.00295858	1.87239	0.643789	0.416846	0.461346	0.389293	SRSF4	1
GO:0000398	mRNA splicing, via spliceosome	1/30	338/18986	0.00295858	1.87239	0.643789	0.416846	0.461346	0.389293	SRSF4	1
GO:0030198	extracellular matrix organization	1/30	339/18986	0.00294985	1.86686	0.640676	0.417785	0.461346	0.389293	CTSS	1
GO:0043062	extracellular structure organization	1/30	340/18986	0.00294118	1.86137	0.637573	0.418721	0.461346	0.389293	CTSS	1
GO:0048545	response to steroid hormone	1/30	340/18986	0.00294118	1.86137	0.637573	0.418721	0.461346	0.389293	BCL2L11	1
GO:0045229	external encapsulating structure organization	1/30	341/18986	0.00293255	1.85591	0.634481	0.419656	0.461685	0.38958	CTSS	1
GO:0000375	RNA splicing, via transesterification reactions	1/30	342/18986	0.00292398	1.85049	0.631399	0.42059	0.462022	0.389864	SRSF4	1
GO:0010038	response to metal ion	1/30	345/18986	0.00289855	1.8344	0.622214	0.423383	0.464396	0.391867	ADD1	1
GO:0052547	regulation of peptidase activity	1/30	346/18986	0.00289017	1.82909	0.619173	0.424311	0.464721	0.392142	BCL2L11	1
GO:0021700	developmental maturation	1/30	350/18986	0.00285714	1.80819	0.607105	0.428008	0.468075	0.394971	RERE	1
GO:0034765	regulation of monoatomic ion transmembrane transport	1/30	354/18986	0.00282486	1.78776	0.595193	0.431683	0.471292	0.397686	CTSS	1
GO:0042063	gliogenesis	1/30	355/18986	0.0028169	1.78272	0.592239	0.432598	0.471292	0.397686	CXCR4	1
GO:0006402	mRNA catabolic process	1/30	356/18986	0.00280899	1.77772	0.589294	0.433512	0.471292	0.397686	PUM2	1
GO:0015980	energy derivation by oxidation of organic compounds	1/30	356/18986	0.00280899	1.77772	0.589294	0.433512	0.471292	0.397686	PUM2	1
GO:0006936	muscle contraction	1/30	358/18986	0.0027933	1.76778	0.583432	0.435335	0.47188	0.398182	CXCR4	1
GO:0070482	response to oxygen levels	1/30	358/18986	0.0027933	1.76778	0.583432	0.435335	0.47188	0.398182	CXCR4	1
GO:0045765	regulation of angiogenesis	1/30	360/18986	0.00277778	1.75796	0.577606	0.437152	0.473153	0.399256	CXCR4	1
GO:0031589	cell-substrate adhesion	1/30	361/18986	0.00277008	1.75309	0.574707	0.438059	0.473438	0.399497	BCL2L11	1
GO:0043010	camera-type eye development	1/30	362/18986	0.00276243	1.74825	0.571817	0.438964	0.47372	0.399735	SP3	1
GO:0051090	regulation of DNA-binding transcription factor activity	1/30	363/18986	0.00275482	1.74343	0.568936	0.439867	0.474001	0.399972	FAF1	1
GO:0045787	positive regulation of cell cycle	1/30	365/18986	0.00273973	1.73388	0.563201	0.441671	0.475248	0.401024	BCL2L11	1
GO:0009895	negative regulation of catabolic process	1/30	367/18986	0.0027248	1.72443	0.5575	0.443468	0.476325	0.401933	RUBCN	1
GO:1901990	regulation of mitotic cell cycle phase transition	1/30	368/18986	0.00271739	1.71975	0.554663	0.444365	0.476325	0.401933	PBRM1	1
GO:0002768	immune response-regulating cell surface receptor signaling pathway	1/30	369/18986	0.00271003	1.71509	0.551835	0.44526	0.476325	0.401933	CD47	1
GO:1901342	regulation of vasculature development	1/30	369/18986	0.00271003	1.71509	0.551835	0.44526	0.476325	0.401933	CXCR4	1
GO:0010639	negative regulation of organelle organization	1/30	371/18986	0.00269542	1.70584	0.546203	0.447047	0.477542	0.40296	ADD1	1
GO:0016236	macroautophagy	1/30	372/18986	0.00268817	1.70125	0.5434	0.447938	0.4778	0.403178	RUBCN	1
GO:0010506	regulation of autophagy	1/30	373/18986	0.00268097	1.69669	0.540606	0.448828	0.478057	0.403395	RUBCN	1
GO:0042176	regulation of protein catabolic process	1/30	374/18986	0.0026738	1.69216	0.537819	0.449716	0.478311	0.403609	FAF1	1
GO:0030522	intracellular receptor signaling pathway	1/30	384/18986	0.00260417	1.64809	0.510404	0.458524	0.486975	0.41092	PUM2	1
GO:0031647	regulation of protein stability	1/30	387/18986	0.00258398	1.63531	0.502333	0.46114	0.489047	0.412669	RNF149	1
GO:0007281	germ cell development	1/30	390/18986	0.0025641	1.62274	0.494332	0.463743	0.491101	0.414401	EIF4G3	1
GO:0008544	epidermis development	1/30	393/18986	0.00254453	1.61035	0.486398	0.466334	0.493135	0.416118	PUM2	1
GO:0060271	cilium assembly	1/30	398/18986	0.00251256	1.59012	0.473321	0.470626	0.49696	0.419345	CCDC88A	1
GO:0050678	regulation of epithelial cell proliferation	1/30	406/18986	0.00246305	1.55878	0.45277	0.477424	0.503416	0.424793	EAF2	1
GO:0010959	regulation of metal ion transport	1/30	408/18986	0.00245098	1.55114	0.447701	0.47911	0.504471	0.425683	CXCR4	1
GO:0001654	eye development	1/30	411/18986	0.00243309	1.53982	0.440149	0.48163	0.506399	0.427311	SP3	1
GO:0006401	RNA catabolic process	1/30	412/18986	0.00242718	1.53608	0.437644	0.482467	0.506556	0.427443	PUM2	1
GO:0150063	visual system development	1/30	415/18986	0.00240964	1.52498	0.430172	0.484971	0.508459	0.429049	SP3	1
GO:0030900	forebrain development	1/30	416/18986	0.00240385	1.52131	0.427694	0.485803	0.508607	0.429174	CXCR4	1
GO:0048880	sensory system development	1/30	422/18986	0.00236967	1.49968	0.41296	0.490768	0.513075	0.432944	SP3	1
GO:0009615	response to virus	1/30	425/18986	0.00235294	1.4891	0.405679	0.493233	0.513715	0.433484	CXCR4	1
GO:0140694	non-membrane-bounded organelle assembly	1/30	425/18986	0.00235294	1.4891	0.405679	0.493233	0.513715	0.433484	PUM2	1
GO:0022412	cellular process involved in reproduction in multicellular organism	1/30	427/18986	0.00234192	1.48212	0.400855	0.494869	0.513715	0.433484	EIF4G3	1
GO:0044782	cilium organization	1/30	427/18986	0.00234192	1.48212	0.400855	0.494869	0.513715	0.433484	CCDC88A	1
GO:0045859	regulation of protein kinase activity	1/30	427/18986	0.00234192	1.48212	0.400855	0.494869	0.513715	0.433484	CCDC88A	1
GO:1903706	regulation of hemopoiesis	1/30	433/18986	0.00230947	1.46159	0.386529	0.499749	0.51805	0.437142	PBRM1	1
GO:0050727	regulation of inflammatory response	1/30	438/18986	0.00228311	1.4449	0.374752	0.503781	0.521495	0.440049	CD47	1
GO:0141188	nucleic acid catabolic process	1/30	441/18986	0.00226757	1.43507	0.367756	0.506185	0.523248	0.441528	PUM2	1
GO:0042060	wound healing	1/30	444/18986	0.00225225	1.42538	0.36081	0.508578	0.524984	0.442993	CXCR4	1
GO:0006816	calcium ion transport	1/30	445/18986	0.00224719	1.42217	0.358505	0.509373	0.525068	0.443064	CXCR4	1
GO:0000280	nuclear division	1/30	451/18986	0.00221729	1.40325	0.344795	0.514118	0.528479	0.445942	BCL2L11	1
GO:0030099	myeloid cell differentiation	1/30	451/18986	0.00221729	1.40325	0.344795	0.514118	0.528479	0.445942	SP3	1
GO:0016032	viral process	1/30	452/18986	0.00221239	1.40015	0.342529	0.514904	0.528549	0.446001	CXCR4	1
GO:0001934	positive regulation of protein phosphorylation	1/30	455/18986	0.0021978	1.39092	0.335762	0.517256	0.530224	0.447414	CCDC88A	1
GO:0001503	ossification	1/30	456/18986	0.00219298	1.38787	0.333517	0.518038	0.530286	0.447467	SP3	1
GO:0048568	embryonic organ development	1/30	458/18986	0.00218341	1.3818	0.329043	0.519597	0.531144	0.44819	SP3	1
GO:0007409	axonogenesis	1/30	459/18986	0.00217865	1.37879	0.326814	0.520375	0.531201	0.448239	RAB10	1
GO:0043549	regulation of kinase activity	1/30	460/18986	0.00217391	1.3758	0.324589	0.521151	0.531257	0.448286	CCDC88A	1
GO:0015711	organic anion transport	1/30	462/18986	0.0021645	1.36984	0.320156	0.522701	0.5321	0.448997	CD47	1
GO:0003012	muscle system process	1/30	465/18986	0.00215054	1.361	0.313544	0.525016	0.533718	0.450363	CXCR4	1
GO:0043161	proteasome-mediated ubiquitin-dependent protein catabolic process	1/30	467/18986	0.00214133	1.35517	0.309161	0.526554	0.533807	0.450438	FAF1	1
GO:0044772	mitotic cell cycle phase transition	1/30	467/18986	0.00214133	1.35517	0.309161	0.526554	0.533807	0.450438	PBRM1	1
GO:0006935	chemotaxis	1/30	472/18986	0.00211864	1.34082	0.298289	0.530377	0.536205	0.452461	CXCR4	1
GO:0031329	regulation of cellular catabolic process	1/30	472/18986	0.00211864	1.34082	0.298289	0.530377	0.536205	0.452461	RUBCN	1
GO:0042330	taxis	1/30	474/18986	0.0021097	1.33516	0.293974	0.531898	0.537005	0.453136	CXCR4	1
GO:0042327	positive regulation of phosphorylation	1/30	479/18986	0.00208768	1.32122	0.283271	0.535679	0.539343	0.455109	CCDC88A	1
GO:1901987	regulation of cell cycle phase transition	1/30	479/18986	0.00208768	1.32122	0.283271	0.535679	0.539343	0.455109	PBRM1	1
GO:0050673	epithelial cell proliferation	1/30	482/18986	0.00207469	1.313	0.276904	0.537933	0.540873	0.4564	EAF2	1
GO:0034762	regulation of transmembrane transport	1/30	487/18986	0.00205339	1.29952	0.266385	0.541667	0.543884	0.458941	CTSS	1
GO:0006091	generation of precursor metabolites and energy	1/30	490/18986	0.00204082	1.29156	0.260128	0.543893	0.545374	0.460199	PUM2	1
GO:0007264	small GTPase-mediated signal transduction	1/30	491/18986	0.00203666	1.28893	0.258051	0.544633	0.545374	0.460199	CCDC88A	1
GO:1903829	positive regulation of protein localization	1/30	497/18986	0.00201207	1.27337	0.24568	0.549048	0.549048	0.463298	CCDC88A	1
Table S20: Go Enrichment Analysis (CC) of the Top30 Genes in B Cells of the Testing set (pvalueCutoff = 1, qvalueCutoff = 1)
ID	Description	GeneRatio	BgRatio	RichFactor	FoldEnrichment	zScore	pvalue	p.adjust	qvalue	geneID	Count
GO:0005770	late endosome	4/30	318/19960	0.0125786	8.36897	5.1393	0.0012493	0.116185	0.0894238	CTSS/RNF149/CXCR4/RUBCN	4
GO:0005769	early endosome	4/30	438/19960	0.00913242	6.0761	4.16756	0.003989	0.138282	0.106431	RABGAP1L/CXCR4/CYTIP/RUBCN	4
GO:0017053	transcription repressor complex	2/30	79/19960	0.0253165	16.8439	5.47435	0.00626204	0.138282	0.106431	SPEN/SP3	2
GO:0000118	histone deacetylase complex	2/30	82/19960	0.0243902	16.2276	5.3608	0.00673103	0.138282	0.106431	RERE/GATAD2B	2
GO:0070603	SWI/SNF superfamily-type complex	2/30	94/19960	0.0212766	14.156	4.96032	0.00876094	0.138282	0.106431	GATAD2B/PBRM1	2
GO:0097136	Bcl-2 family protein complex	1/30	10/19960	0.1	66.5333	8.04206	0.0149322	0.138282	0.106431	BCL2L11	1
GO:1904949	ATPase complex	2/30	126/19960	0.015873	10.5608	4.17689	0.0153225	0.138282	0.106431	GATAD2B/PBRM1	2
GO:0016281	eukaryotic translation initiation factor 4F complex	1/30	13/19960	0.0769231	51.1795	7.02159	0.0193696	0.138282	0.106431	EIF4G3	1
GO:0045335	phagocytic vesicle	2/30	145/19960	0.0137931	9.17701	3.83405	0.0199592	0.138282	0.106431	CTSS/RAB10	2
GO:0016586	RSC-type complex	1/30	15/19960	0.0666667	44.3556	6.51703	0.0223172	0.138282	0.106431	PBRM1	1
GO:0016581	NuRD complex	1/30	16/19960	0.0625	41.5833	6.30054	0.0237877	0.138282	0.106431	GATAD2B	1
GO:0090545	CHD-type complex	1/30	16/19960	0.0625	41.5833	6.30054	0.0237877	0.138282	0.106431	GATAD2B	1
GO:0016607	nuclear speck	3/30	416/19960	0.00721154	4.79808	3.03725	0.0240622	0.138282	0.106431	SRSF4/GATAD2B/EAF2	3
GO:0070820	tertiary granule	2/30	164/19960	0.0121951	8.11382	3.54905	0.0251084	0.138282	0.106431	CTSS/CD47	2
GO:0000145	exocyst	1/30	17/19960	0.0588235	39.1373	6.10316	0.0252562	0.138282	0.106431	RAB10	1
GO:0034518	RNA cap binding complex	1/30	17/19960	0.0588235	39.1373	6.10316	0.0252562	0.138282	0.106431	EIF4G3	1
GO:0005925	focal adhesion	3/30	424/19960	0.00707547	4.70755	2.99384	0.0252774	0.138282	0.106431	RAB10/LPP/ADD1	3
GO:0030055	cell-substrate junction	3/30	434/19960	0.00691244	4.59908	2.94107	0.0268429	0.138688	0.106744	RAB10/LPP/ADD1	3
GO:0030133	transport vesicle	3/30	453/19960	0.00662252	4.40618	2.8451	0.029959	0.146641	0.112865	SYTL1/RAB10/CCDC88A	3
GO:0005912	adherens junction	2/30	189/19960	0.010582	7.04056	3.23721	0.0326133	0.151652	0.116721	RAB10/ADD1	2
GO:0030137	COPI-coated vesicle	1/30	25/19960	0.04	26.6133	4.97169	0.036927	0.163534	0.125866	CCDC88A	1
GO:0036019	endolysosome	1/30	28/19960	0.0357143	23.7619	4.67615	0.0412686	0.171091	0.131683	CTSS	1
GO:0016514	SWI/SNF complex	1/30	30/19960	0.0333333	22.1778	4.50364	0.0441525	0.171091	0.131683	PBRM1	1
GO:0071782	endoplasmic reticulum tubular network	1/30	30/19960	0.0333333	22.1778	4.50364	0.0441525	0.171091	0.131683	RAB10	1
GO:0031528	microvillus membrane	1/30	33/19960	0.030303	20.1616	4.2741	0.0484627	0.180281	0.138756	SYTL1	1
GO:0070382	exocytic vesicle	2/30	253/19960	0.00790514	5.25955	2.64539	0.0551778	0.184686	0.142147	SYTL1/RAB10	2
GO:0031904	endosome lumen	1/30	38/19960	0.0263158	17.5088	3.952	0.0556045	0.184686	0.142147	CTSS	1
GO:0080008	Cul4-RING E3 ubiquitin ligase complex	1/30	38/19960	0.0263158	17.5088	3.952	0.0556045	0.184686	0.142147	DCAF8	1
GO:0008023	transcription elongation factor complex	1/30	51/19960	0.0196078	13.0458	3.34172	0.0739317	0.237091	0.182481	EAF2	1
GO:1904724	tertiary granule lumen	1/30	55/19960	0.0181818	12.097	3.19728	0.0795013	0.240489	0.185096	CTSS	1
GO:0030667	secretory granule membrane	2/30	320/19960	0.00625	4.15833	2.20973	0.0831027	0.240489	0.185096	RAB10/CD47	2
GO:0005791	rough endoplasmic reticulum	1/30	58/19960	0.0172414	11.4713	3.09843	0.0836573	0.240489	0.185096	SEC62	1
GO:0005938	cell cortex	2/30	325/19960	0.00615385	4.09436	2.18209	0.0853349	0.240489	0.185096	RAB10/CYTIP	2
GO:0099023	vesicle tethering complex	1/30	67/19960	0.0149254	9.93035	2.84074	0.0960166	0.262634	0.20214	RAB10	1
GO:0030139	endocytic vesicle	2/30	356/19960	0.00561798	3.73783	2.02225	0.099574	0.264582	0.20364	CTSS/RAB10	2
GO:0070821	tertiary granule membrane	1/30	73/19960	0.0136986	9.11416	2.69461	0.104166	0.265658	0.204468	CD47	1
GO:0030670	phagocytic vesicle membrane	1/30	82/19960	0.0121951	8.11382	2.50438	0.116258	0.265658	0.204468	RAB10	1
GO:0001725	stress fiber	1/30	85/19960	0.0117647	7.82745	2.44732	0.120254	0.265658	0.204468	LPP	1
GO:0097517	contractile actin filament bundle	1/30	85/19960	0.0117647	7.82745	2.44732	0.120254	0.265658	0.204468	LPP	1
GO:0098687	chromosomal region	2/30	404/19960	0.0049505	3.29373	1.80705	0.122825	0.265658	0.204468	GATAD2B/PBRM1	2
GO:0009897	external side of plasma membrane	2/30	407/19960	0.004914	3.26945	1.79468	0.124321	0.265658	0.204468	FCRL5/CXCR4	2
GO:0035579	specific granule membrane	1/30	91/19960	0.010989	7.31136	2.34116	0.128192	0.265658	0.204468	CD47	1
GO:0042641	actomyosin	1/30	91/19960	0.010989	7.31136	2.34116	0.128192	0.265658	0.204468	LPP	1
GO:0010494	cytoplasmic stress granule	1/30	94/19960	0.0106383	7.07801	2.29164	0.132135	0.265658	0.204468	PUM2	1
GO:0005798	Golgi-associated vesicle	1/30	95/19960	0.0105263	7.00351	2.27562	0.133446	0.265658	0.204468	CCDC88A	1
GO:0032432	actin filament bundle	1/30	95/19960	0.0105263	7.00351	2.27562	0.133446	0.265658	0.204468	LPP	1
GO:0043202	lysosomal lumen	1/30	98/19960	0.0102041	6.78912	2.2289	0.137366	0.265658	0.204468	CTSS	1
GO:0031252	cell leading edge	2/30	433/19960	0.00461894	3.07313	1.69211	0.137473	0.265658	0.204468	CCDC88A/CXCR4	2
GO:0005902	microvillus	1/30	100/19960	0.01	6.65333	2.19883	0.13997	0.265658	0.204468	SYTL1	1
GO:0016605	PML body	1/30	109/19960	0.00917431	6.10398	2.07304	0.151594	0.272745	0.209922	SP3	1
GO:0055038	recycling endosome membrane	1/30	109/19960	0.00917431	6.10398	2.07304	0.151594	0.272745	0.209922	RAB10	1
GO:0042470	melanosome	1/30	112/19960	0.00892857	5.94048	2.03421	0.155435	0.272745	0.209922	SYTL1	1
GO:0048770	pigment granule	1/30	112/19960	0.00892857	5.94048	2.03421	0.155435	0.272745	0.209922	SYTL1	1
GO:0140534	endoplasmic reticulum protein-containing complex	1/30	116/19960	0.00862069	5.73563	1.98458	0.16053	0.276469	0.212789	FAF1	1
GO:1904813	ficolin-1-rich granule lumen	1/30	124/19960	0.00806452	5.36559	1.89192	0.170631	0.284969	0.219331	CTSS	1
GO:0005635	nuclear envelope	2/30	498/19960	0.00401606	2.67202	1.46602	0.171594	0.284969	0.219331	FAF1/PUM2	2
GO:0016363	nuclear matrix	1/30	129/19960	0.00775194	5.15762	1.83799	0.176885	0.288601	0.222127	PBRM1	1
GO:0072562	blood microparticle	1/30	144/19960	0.00694444	4.62037	1.69162	0.195373	0.31327	0.241113	ZBTB38	1
GO:0034399	nuclear periphery	1/30	155/19960	0.00645161	4.29247	1.59653	0.208675	0.328928	0.253164	PBRM1	1
GO:0042581	specific granule	1/30	160/19960	0.00625	4.15833	1.55619	0.21465	0.332688	0.256059	CD47	1
GO:0005814	centriole	1/30	163/19960	0.00613497	4.0818	1.53276	0.218215	0.332688	0.256059	CCDC88A	1
GO:0000776	kinetochore	1/30	173/19960	0.00578035	3.84586	1.45855	0.229984	0.338522	0.260549	PBRM1	1
GO:0000781	chromosome, telomeric region	1/30	173/19960	0.00578035	3.84586	1.45855	0.229984	0.338522	0.260549	GATAD2B	1
GO:0005775	vacuolar lumen	1/30	178/19960	0.00561798	3.73783	1.4235	0.235804	0.338522	0.260549	CTSS	1
GO:0036064	ciliary basal body	1/30	180/19960	0.00555556	3.6963	1.40983	0.23812	0.338522	0.260549	CCDC88A	1
GO:0000779	condensed chromosome, centromeric region	1/30	185/19960	0.00540541	3.5964	1.3765	0.243881	0.338522	0.260549	PBRM1	1
GO:0101002	ficolin-1-rich granule	1/30	185/19960	0.00540541	3.5964	1.3765	0.243881	0.338522	0.260549	CTSS	1
GO:0030027	lamellipodium	1/30	203/19960	0.00492611	3.2775	1.26539	0.264273	0.361433	0.278182	CCDC88A	1
GO:0030666	endocytic vesicle membrane	1/30	207/19960	0.00483092	3.21417	1.24238	0.268732	0.36145	0.278196	RAB10	1
GO:0055037	recycling endosome	1/30	210/19960	0.0047619	3.16825	1.2255	0.272059	0.36145	0.278196	RAB10	1
GO:0005741	mitochondrial outer membrane	1/30	223/19960	0.0044843	2.98356	1.15567	0.286308	0.375023	0.288642	BCL2L11	1
GO:0031461	cullin-RING ubiquitin ligase complex	1/30	230/19960	0.00434783	2.89275	1.12014	0.293868	0.377387	0.290462	DCAF8	1
GO:0098858	actin-based cell projection	1/30	234/19960	0.0042735	2.8433	1.10043	0.298153	0.377387	0.290462	SYTL1	1
GO:0000228	nuclear chromosome	1/30	236/19960	0.00423729	2.81921	1.09073	0.300286	0.377387	0.290462	PBRM1	1
GO:0032993	protein-DNA complex	1/30	240/19960	0.00416667	2.77222	1.07163	0.304534	0.377622	0.290643	SP3	1
GO:0031968	organelle outer membrane	1/30	252/19960	0.00396825	2.64021	1.01661	0.317128	0.385484	0.296694	BCL2L11	1
GO:0019867	outer membrane	1/30	254/19960	0.00393701	2.61942	1.00775	0.319205	0.385484	0.296694	BCL2L11	1
GO:0036464	cytoplasmic ribonucleoprotein granule	1/30	258/19960	0.00387597	2.57881	0.990288	0.323342	0.385484	0.296694	PUM2	1
GO:0000775	chromosome, centromeric region	1/30	262/19960	0.00381679	2.53944	0.973148	0.327454	0.385484	0.296694	PBRM1	1
GO:0005802	trans-Golgi network	1/30	269/19960	0.00371747	2.47336	0.943902	0.334593	0.388964	0.299372	RAB10	1
GO:0035770	ribonucleoprotein granule	1/30	277/19960	0.00361011	2.40193	0.911582	0.342661	0.393426	0.302806	PUM2	1
GO:0000793	condensed chromosome	1/30	284/19960	0.00352113	2.34272	0.884206	0.349643	0.396547	0.305209	PBRM1	1
GO:0031965	nuclear membrane	1/30	312/19960	0.00320513	2.13248	0.782212	0.376862	0.422268	0.325005	PUM2	1
GO:0030135	coated vesicle	1/30	320/19960	0.003125	2.07917	0.755039	0.384435	0.425624	0.327589	CCDC88A	1
GO:0000151	ubiquitin ligase complex	1/30	355/19960	0.0028169	1.87418	0.644774	0.416531	0.449067	0.345631	DCAF8	1
GO:0031253	cell projection membrane	1/30	358/19960	0.0027933	1.85847	0.635908	0.419206	0.449067	0.345631	SYTL1	1
GO:0014069	postsynaptic density	1/30	359/19960	0.00278552	1.8533	0.632972	0.420095	0.449067	0.345631	ADD1	1
GO:0032279	asymmetric synapse	1/30	375/19960	0.00266667	1.77422	0.587213	0.434139	0.458806	0.353127	ADD1	1
GO:0098791	Golgi apparatus subcompartment	1/30	391/19960	0.00255754	1.70162	0.543604	0.447854	0.467143	0.359544	RAB10	1
GO:0099572	postsynaptic specialization	1/30	396/19960	0.00252525	1.68013	0.530384	0.452074	0.467143	0.359544	ADD1	1
GO:0098984	neuron to neuron synapse	1/30	412/19960	0.00242718	1.61489	0.489293	0.465369	0.475597	0.366051	ADD1	1
GO:0062023	collagen-containing extracellular matrix	1/30	430/19960	0.00232558	1.54729	0.445117	0.479953	0.48517	0.373419	CTSS	1
GO:0005874	microtubule	1/30	489/19960	0.00204499	1.3606	0.313229	0.525109	0.525109	0.404159	BCL2L11	1
Table S20: Go Enrichment Analysis (MF) of the Top30 Genes in B Cells of the Testing set (pvalueCutoff = 1, qvalueCutoff = 1)
ID	Description	GeneRatio	BgRatio	RichFactor	FoldEnrichment	zScore	pvalue	p.adjust	qvalue	geneID	Count
GO:0061629	RNA polymerase II-specific DNA-binding transcription factor binding	4/30	349/18737	0.0114613	7.15836	4.65058	0.00221124	0.129861	0.089427	SPEN/FAF1/SP3/ADD1	4
GO:0098632	cell-cell adhesion mediator activity	2/30	53/18737	0.0377358	23.5686	6.58876	0.00324608	0.129861	0.089427	RAB10/CD47	2
GO:0015026	coreceptor activity	2/30	61/18737	0.0327869	20.4776	6.10176	0.00427675	0.129861	0.089427	FCRL5/CXCR4	2
GO:0098631	cell adhesion mediator activity	2/30	69/18737	0.0289855	18.1034	5.69973	0.00543934	0.129861	0.089427	RAB10/CD47	2
GO:0017022	myosin binding	2/30	75/18737	0.0266667	16.6551	5.44007	0.00639586	0.129861	0.089427	RAB10/CXCR4	2
GO:0140297	DNA-binding transcription factor binding	4/30	488/18737	0.00819672	5.1194	3.69251	0.00728192	0.129861	0.089427	SPEN/FAF1/SP3/ADD1	4
GO:0019207	kinase regulator activity	3/30	273/18737	0.010989	6.86337	3.90807	0.0092881	0.140252	0.0965831	FAF1/CCDC88A/RUBCN	3
GO:0043130	ubiquitin binding	2/30	100/18737	0.02	12.4913	4.61402	0.0111301	0.140252	0.0965831	FAF1/CXCR4	2
GO:0032182	ubiquitin-like protein binding	2/30	120/18737	0.0166667	10.4094	4.14092	0.0157403	0.140252	0.0965831	FAF1/CXCR4	2
GO:0043422	protein kinase B binding	1/30	10/18737	0.1	62.4567	7.78452	0.0159	0.140252	0.0965831	CCDC88A	1
GO:0045296	cadherin binding	3/30	334/18737	0.00898204	5.60988	3.4042	0.015966	0.140252	0.0965831	RAB10/LRRFIP1/ADD1	3
GO:0035014	phosphatidylinositol 3-kinase regulator activity	1/30	12/18737	0.0833333	52.0472	7.08351	0.0190506	0.140252	0.0965831	RUBCN	1
GO:0005172	vascular endothelial growth factor receptor binding	1/30	13/18737	0.0769231	48.0436	6.79469	0.0206222	0.140252	0.0965831	CCDC88A	1
GO:0086080	protein binding involved in heterotypic cell-cell adhesion	1/30	13/18737	0.0769231	48.0436	6.79469	0.0206222	0.140252	0.0965831	CD47	1
GO:1990825	sequence-specific mRNA binding	1/30	14/18737	0.0714286	44.6119	6.537	0.0221914	0.140252	0.0965831	SRSF4	1
GO:0042043	neurexin family protein binding	1/30	15/18737	0.0666667	41.6378	6.30516	0.0237581	0.140252	0.0965831	SYTL1	1
GO:0005092	GDP-dissociation inhibitor activity	1/30	17/18737	0.0588235	36.7392	5.90355	0.0268843	0.140252	0.0965831	CCDC88A	1
GO:0031489	myosin V binding	1/30	17/18737	0.0588235	36.7392	5.90355	0.0268843	0.140252	0.0965831	RAB10	1
GO:0098641	cadherin binding involved in cell-cell adhesion	1/30	18/18737	0.0555556	34.6981	5.72793	0.0284438	0.140252	0.0965831	RAB10	1
GO:0000339	RNA cap binding	1/30	20/18737	0.05	31.2283	5.41637	0.0315555	0.140252	0.0965831	EIF4G3	1
GO:0003779	actin binding	3/30	441/18737	0.00680272	4.24875	2.76474	0.0328584	0.140252	0.0965831	CCDC88A/CXCR4/ADD1	3
GO:0008656	cysteine-type endopeptidase activator activity involved in apoptotic process	1/30	21/18737	0.047619	29.7413	5.27723	0.0331078	0.140252	0.0965831	CTSS	1
GO:0005158	insulin receptor binding	1/30	23/18737	0.0434783	27.1551	5.02613	0.0362051	0.140252	0.0965831	CCDC88A	1
GO:0016493	C-C chemokine receptor activity	1/30	23/18737	0.0434783	27.1551	5.02613	0.0362051	0.140252	0.0965831	CXCR4	1
GO:0016505	peptidase activator activity involved in apoptotic process	1/30	24/18737	0.0416667	26.0236	4.91225	0.0377501	0.140252	0.0965831	CTSS	1
GO:0019957	C-C chemokine binding	1/30	24/18737	0.0416667	26.0236	4.91225	0.0377501	0.140252	0.0965831	CXCR4	1
GO:0001637	G protein-coupled chemoattractant receptor activity	1/30	26/18737	0.0384615	24.0218	4.70408	0.040833	0.140252	0.0965831	CXCR4	1
GO:0004950	chemokine receptor activity	1/30	26/18737	0.0384615	24.0218	4.70408	0.040833	0.140252	0.0965831	CXCR4	1
GO:0030507	spectrin binding	1/30	26/18737	0.0384615	24.0218	4.70408	0.040833	0.140252	0.0965831	ADD1	1
GO:0003714	transcription corepressor activity	2/30	205/18737	0.0097561	6.09333	2.9364	0.0424025	0.140252	0.0965831	RERE/SPEN	2
GO:0051959	dynein light intermediate chain binding	1/30	28/18737	0.0357143	22.306	4.51806	0.0439063	0.140252	0.0965831	CCDC88A	1
GO:0043236	laminin binding	1/30	29/18737	0.0344828	21.5368	4.43215	0.0454394	0.140252	0.0965831	CTSS	1
GO:0106222	lncRNA binding	1/30	29/18737	0.0344828	21.5368	4.43215	0.0454394	0.140252	0.0965831	PUM2	1
GO:0001965	G-protein alpha-subunit binding	1/30	30/18737	0.0333333	20.8189	4.35046	0.0469702	0.140252	0.0965831	CCDC88A	1
GO:0001968	fibronectin binding	1/30	30/18737	0.0333333	20.8189	4.35046	0.0469702	0.140252	0.0965831	CTSS	1
GO:0008327	methyl-CpG binding	1/30	31/18737	0.0322581	20.1473	4.27263	0.0484985	0.140252	0.0965831	ZBTB38	1
GO:0051059	NF-kappaB binding	1/30	31/18737	0.0322581	20.1473	4.27263	0.0484985	0.140252	0.0965831	FAF1	1
GO:0019956	chemokine binding	1/30	33/18737	0.030303	18.9263	4.1274	0.0515481	0.145149	0.0999548	CXCR4	1
GO:0005154	epidermal growth factor receptor binding	1/30	35/18737	0.0285714	17.8448	3.9944	0.0545883	0.149768	0.103136	CCDC88A	1
GO:0019887	protein kinase regulator activity	2/30	243/18737	0.00823045	5.14047	2.60156	0.0574519	0.150372	0.103551	FAF1/CCDC88A	2
GO:0043394	proteoglycan binding	1/30	37/18737	0.027027	16.8802	3.87197	0.057619	0.150372	0.103551	CTSS	1
GO:0001530	lipopolysaccharide binding	1/30	41/18737	0.0243902	15.2333	3.6536	0.0636523	0.154924	0.106686	ZRANB2	1
GO:0042169	SH2 domain binding	1/30	41/18737	0.0243902	15.2333	3.6536	0.0636523	0.154924	0.106686	CCDC88A	1
GO:0031492	nucleosomal DNA binding	1/30	42/18737	0.0238095	14.8706	3.60375	0.0651548	0.154924	0.106686	GATAD2B	1
GO:0035198	miRNA binding	1/30	42/18737	0.0238095	14.8706	3.60375	0.0651548	0.154924	0.106686	PUM2	1
GO:0043028	cysteine-type endopeptidase regulator activity involved in apoptotic process	1/30	44/18737	0.0227273	14.1947	3.509	0.0681528	0.155324	0.106962	CTSS	1
GO:0001227	DNA-binding transcription repressor activity, RNA polymerase II-specific	2/30	268/18737	0.00746269	4.66095	2.41733	0.0682265	0.155324	0.106962	SP3/LRRFIP1	2
GO:0001217	DNA-binding transcription repressor activity	2/30	278/18737	0.00719424	4.49329	2.3499	0.0727125	0.157549	0.108494	SP3/LRRFIP1	2
GO:0008017	microtubule binding	2/30	280/18737	0.00714286	4.46119	2.3368	0.0736211	0.157549	0.108494	CCDC88A/BCL2L11	2
GO:0035091	phosphatidylinositol binding	2/30	280/18737	0.00714286	4.46119	2.3368	0.0736211	0.157549	0.108494	CCDC88A/RUBCN	2
GO:0031267	small GTPase binding	2/30	284/18737	0.00704225	4.39836	2.31096	0.0754497	0.158296	0.109009	SYTL1/RABGAP1L	2
GO:0003743	translation initiation factor activity	1/30	51/18737	0.0196078	12.2464	3.22061	0.0785727	0.161548	0.111248	EIF4G3	1
GO:0005080	protein kinase C binding	1/30	52/18737	0.0192308	12.0109	3.18401	0.080052	0.161548	0.111248	CCDC88A	1
GO:0003925	G protein activity	1/30	53/18737	0.0188679	11.7843	3.14841	0.0815291	0.161548	0.111248	RAB10	1
GO:0031625	ubiquitin protein ligase binding	2/30	301/18737	0.00664452	4.14994	2.20623	0.0833826	0.162217	0.111709	FAF1/CXCR4	2
GO:0061980	regulatory RNA binding	1/30	58/18737	0.0172414	10.7684	2.98371	0.0888799	0.16712	0.115085	PUM2	1
GO:0016504	peptidase activator activity	1/30	59/18737	0.0169492	10.5859	2.95318	0.0903433	0.16712	0.115085	CTSS	1
GO:0051020	GTPase binding	2/30	316/18737	0.00632911	3.95295	2.12002	0.0905886	0.16712	0.115085	SYTL1/RABGAP1L	2
GO:0044389	ubiquitin-like protein ligase binding	2/30	321/18737	0.00623053	3.89138	2.09246	0.0930313	0.168718	0.116185	FAF1/CXCR4	2
GO:0050840	extracellular matrix binding	1/30	65/18737	0.0153846	9.60872	2.78418	0.0990757	0.176685	0.121672	CTSS	1
GO:0005518	collagen binding	1/30	69/18737	0.0144928	9.05169	2.68324	0.104852	0.180955	0.124612	CTSS	1
GO:0043539	protein serine/threonine kinase activator activity	1/30	69/18737	0.0144928	9.05169	2.68324	0.104852	0.180955	0.124612	CCDC88A	1
GO:0003725	double-stranded RNA binding	1/30	73/18737	0.0136986	8.55571	2.59019	0.110593	0.187288	0.128973	LRRFIP1	1
GO:0031491	nucleosome binding	1/30	74/18737	0.0135135	8.44009	2.56803	0.112023	0.187288	0.128973	GATAD2B	1
GO:0019003	GDP binding	1/30	76/18737	0.0131579	8.21798	2.52495	0.114875	0.189102	0.130223	RAB10	1
GO:0001618	virus receptor activity	1/30	79/18737	0.0126582	7.90591	2.46319	0.119137	0.192526	0.132581	CXCR4	1
GO:0140272	exogenous protein binding	1/30	80/18737	0.0125	7.80708	2.44333	0.120554	0.192526	0.132581	CXCR4	1
GO:0008135	translation factor activity, RNA binding	1/30	83/18737	0.0120482	7.5249	2.38574	0.124789	0.19636	0.135221	EIF4G3	1
GO:0004197	cysteine-type endopeptidase activity	1/30	85/18737	0.0117647	7.34784	2.34893	0.127602	0.197876	0.136265	CTSS	1
GO:0015631	tubulin binding	2/30	392/18737	0.00510204	3.18656	1.75204	0.129631	0.19815	0.136453	CCDC88A/BCL2L11	2
GO:0004896	cytokine receptor activity	1/30	97/18737	0.0103093	6.43883	2.15063	0.144297	0.217462	0.149752	CXCR4	1
GO:0090079	translation regulator activity, nucleic acid binding	1/30	110/18737	0.00909091	5.67788	1.97047	0.162035	0.240801	0.165825	EIF4G3	1
GO:0030695	GTPase regulator activity	2/30	491/18737	0.00407332	2.54406	1.38841	0.185116	0.263071	0.18116	RABGAP1L/CCDC88A	2
GO:0060589	nucleoside-triphosphatase regulator activity	2/30	491/18737	0.00407332	2.54406	1.38841	0.185116	0.263071	0.18116	RABGAP1L/CCDC88A	2
GO:0031490	chromatin DNA binding	1/30	128/18737	0.0078125	4.87943	1.76363	0.186008	0.263071	0.18116	GATAD2B	1
GO:0005543	phospholipid binding	2/30	494/18737	0.00404858	2.52861	1.37882	0.186854	0.263071	0.18116	CCDC88A/RUBCN	2
GO:0031072	heat shock protein binding	1/30	131/18737	0.00763359	4.76768	1.73293	0.189939	0.263941	0.18176	FAF1	1
GO:0030295	protein kinase activator activity	1/30	134/18737	0.00746269	4.66095	1.70314	0.193851	0.265924	0.183125	CCDC88A	1
GO:0070851	growth factor receptor binding	1/30	138/18737	0.00724638	4.52585	1.66477	0.199039	0.269585	0.185646	CCDC88A	1
GO:0019209	kinase activator activity	1/30	142/18737	0.00704225	4.39836	1.62784	0.204195	0.271435	0.18692	CCDC88A	1
GO:0019955	cytokine binding	1/30	143/18737	0.00699301	4.3676	1.61882	0.205479	0.271435	0.18692	CXCR4	1
GO:0140375	immune receptor activity	1/30	154/18737	0.00649351	4.05563	1.52475	0.21947	0.286382	0.197213	CXCR4	1
GO:0004252	serine-type endopeptidase activity	1/30	178/18737	0.00561798	3.5088	1.34678	0.249175	0.321226	0.221208	CTSS	1
GO:1901981	phosphatidylinositol phosphate binding	1/30	181/18737	0.00552486	3.45064	1.32671	0.252811	0.322032	0.221764	RUBCN	1
GO:0008234	cysteine-type peptidase activity	1/30	184/18737	0.00543478	3.39438	1.30705	0.256429	0.322799	0.222291	CTSS	1
GO:0008236	serine-type peptidase activity	1/30	195/18737	0.00512821	3.20291	1.23832	0.269552	0.335373	0.23095	CTSS	1
GO:0017171	serine hydrolase activity	1/30	199/18737	0.00502513	3.13853	1.21453	0.274268	0.337318	0.23229	CTSS	1
GO:0005516	calmodulin binding	1/30	206/18737	0.00485437	3.03188	1.1743	0.282451	0.343434	0.236502	ADD1	1
GO:0051015	actin filament binding	1/30	211/18737	0.00473934	2.96003	1.1466	0.288241	0.346537	0.238638	ADD1	1
GO:0005085	guanyl-nucleotide exchange factor activity	1/30	230/18737	0.00434783	2.71551	1.0483	0.309834	0.368358	0.253665	CCDC88A	1
GO:0061134	peptidase regulator activity	1/30	235/18737	0.00425532	2.65773	1.02408	0.31541	0.370867	0.255393	CTSS	1
GO:0003730	mRNA 3'-UTR binding	1/30	262/18737	0.00381679	2.38384	0.903321	0.344778	0.400992	0.276138	PUM2	1
GO:0005096	GTPase activator activity	1/30	272/18737	0.00367647	2.2962	0.862341	0.355343	0.408835	0.281539	RABGAP1L	1
GO:0005126	cytokine receptor binding	1/30	277/18737	0.00361011	2.25475	0.842518	0.360563	0.410428	0.282636	CCDC88A	1
GO:0003713	transcription coactivator activity	1/30	285/18737	0.00350877	2.19146	0.811667	0.368831	0.41542	0.286074	RERE	1
GO:0003924	GTPase activity	1/30	333/18737	0.003003	1.87558	0.64559	0.41631	0.464012	0.319536	RAB10	1
GO:0061630	ubiquitin protein ligase activity	1/30	355/18737	0.0028169	1.75934	0.578432	0.436899	0.48194	0.331882	RNF149	1
GO:0046982	protein heterodimerization activity	1/30	363/18737	0.00275482	1.72057	0.555168	0.444211	0.485005	0.333993	ADD1	1
GO:0061659	ubiquitin-like protein ligase activity	1/30	374/18737	0.0026738	1.66996	0.524098	0.454114	0.49081	0.33799	RNF149	1
GO:0005525	GTP binding	1/30	380/18737	0.00263158	1.6436	0.507577	0.459444	0.491605	0.338538	RAB10	1
GO:0019001	guanyl nucleotide binding	1/30	402/18737	0.00248756	1.55365	0.44937	0.47856	0.498916	0.343572	RAB10	1
GO:0032561	guanyl ribonucleotide binding	1/30	402/18737	0.00248756	1.55365	0.44937	0.47856	0.498916	0.343572	RAB10	1
GO:0004175	endopeptidase activity	1/30	404/18737	0.00247525	1.54596	0.444252	0.480265	0.498916	0.343572	CTSS	1
GO:0045182	translation regulator activity	1/30	438/18737	0.00228311	1.42595	0.361227	0.508439	0.523106	0.36023	EIF4G3	1
GO:0004842	ubiquitin-protein transferase activity	1/30	452/18737	0.00221239	1.38178	0.329031	0.519606	0.529503	0.364636	RNF149	1
GO:0019787	ubiquitin-like protein transferase activity	1/30	482/18737	0.00207469	1.29578	0.263451	0.542715	0.547835	0.37726	RNF149	1
GO:0016755	aminoacyltransferase activity	1/30	499/18737	0.00200401	1.25164	0.228156	0.555329	0.555329	0.382421	RNF149	1

## Sheet: Table S20(GO_TOP30_EN)
Table S20: Go Enrichment Analysis (BP) of the Top30 Genes in Endothelial Cells of the Testing set (pvalueCutoff = 1, qvalueCutoff = 1)
ID	Description	GeneRatio	BgRatio	RichFactor	FoldEnrichment	zScore	pvalue	p.adjust	qvalue	geneID	Count
GO:0015937	coenzyme A biosynthetic process	2/29	10/18986	0.2	130.938	16.0751	0.000100607	0.0913514	0.0716959	PANK4/ACOT7	2
GO:0015936	coenzyme A metabolic process	2/29	18/18986	0.111111	72.7433	11.9104	0.000339481	0.154124	0.120962	PANK4/ACOT7	2
GO:0001666	response to hypoxia	4/29	317/18986	0.0126183	8.26107	5.09905	0.0013026	0.169894	0.133339	ENO1/MTOR/AGTRAP/MTHFR	4
GO:1903580	positive regulation of ATP metabolic process	2/29	36/18986	0.0555556	36.3716	8.30848	0.00137424	0.169894	0.133339	ENO1/MTOR	2
GO:0036293	response to decreased oxygen levels	4/29	331/18986	0.0120846	7.91166	4.96156	0.00152698	0.169894	0.133339	ENO1/MTOR/AGTRAP/MTHFR	4
GO:0006904	vesicle docking involved in exocytosis	2/29	39/18986	0.0512821	33.5738	7.96435	0.00161179	0.169894	0.133339	TPRG1L/VAMP3	2
GO:0072523	purine-containing compound catabolic process	3/29	155/18986	0.0193548	12.6714	5.70653	0.0016687	0.169894	0.133339	ACOT7/ENO1/MTOR	3
GO:0045981	positive regulation of nucleotide metabolic process	2/29	40/18986	0.05	32.7345	7.85818	0.00169502	0.169894	0.133339	ENO1/MTOR	2
GO:1900544	positive regulation of purine nucleotide metabolic process	2/29	40/18986	0.05	32.7345	7.85818	0.00169502	0.169894	0.133339	ENO1/MTOR	2
GO:0070482	response to oxygen levels	4/29	358/18986	0.0111732	7.31497	4.7179	0.00203377	0.169894	0.133339	ENO1/MTOR/AGTRAP/MTHFR	4
GO:0033173	calcineurin-NFAT signaling cascade	2/29	47/18986	0.0425532	27.8591	7.21077	0.00233363	0.169894	0.133339	TPRG1L/MTOR	2
GO:0097720	calcineurin-mediated signaling	2/29	49/18986	0.0408163	26.722	7.05127	0.00253391	0.169894	0.133339	TPRG1L/MTOR	2
GO:0044272	sulfur compound biosynthetic process	3/29	182/18986	0.0164835	10.7916	5.19138	0.00263549	0.169894	0.133339	PANK4/ACOT7/MTHFR	3
GO:1901292	nucleoside phosphate catabolic process	3/29	184/18986	0.0163043	10.6743	5.15757	0.00271826	0.169894	0.133339	ACOT7/ENO1/MTOR	3
GO:0031529	ruffle organization	2/29	57/18986	0.0350877	22.9716	6.49762	0.00341299	0.169894	0.133339	MTOR/RCC2	2
GO:0120032	regulation of plasma membrane bounded cell projection assembly	3/29	205/18986	0.0146341	9.58082	4.83132	0.00368561	0.169894	0.133339	WRAP73/MTOR/RCC2	3
GO:0060491	regulation of cell projection assembly	3/29	207/18986	0.0144928	9.48826	4.80272	0.00378733	0.169894	0.133339	WRAP73/MTOR/RCC2	3
GO:0048278	vesicle docking	2/29	61/18986	0.0327869	21.4652	6.26157	0.00389864	0.169894	0.133339	TPRG1L/VAMP3	2
GO:0010833	telomere maintenance via telomere lengthening	2/29	75/18986	0.0266667	17.4584	5.58573	0.00583428	0.169894	0.133339	ZBTB48/EXOSC10	2
GO:1903578	regulation of ATP metabolic process	2/29	75/18986	0.0266667	17.4584	5.58573	0.00583428	0.169894	0.133339	ENO1/MTOR	2
GO:0046434	organophosphate catabolic process	3/29	242/18986	0.0123967	8.11599	4.35744	0.00585147	0.169894	0.133339	ACOT7/ENO1/MTOR	3
GO:0140056	organelle localization by membrane tethering	2/29	80/18986	0.025	16.3672	5.38717	0.00661247	0.169894	0.133339	TPRG1L/VAMP3	2
GO:0001843	neural tube closure	2/29	82/18986	0.0243902	15.968	5.31269	0.00693629	0.169894	0.133339	SKI/MTHFR	2
GO:1901136	carbohydrate derivative catabolic process	3/29	258/18986	0.0116279	7.61267	4.18274	0.00698112	0.169894	0.133339	ENO1/MTOR/FBXO6	3
GO:0060606	tube closure	2/29	83/18986	0.0240964	15.7757	5.27643	0.00710086	0.169894	0.133339	SKI/MTHFR	2
GO:0072522	purine-containing compound biosynthetic process	3/29	263/18986	0.0114068	7.46794	4.1312	0.00735893	0.169894	0.133339	PANK4/ACOT7/ENO1	3
GO:1900542	regulation of purine nucleotide metabolic process	2/29	86/18986	0.0232558	15.2253	5.17131	0.00760516	0.169894	0.133339	ENO1/MTOR	2
GO:0006140	regulation of nucleotide metabolic process	2/29	87/18986	0.0229885	15.0503	5.13744	0.00777678	0.169894	0.133339	ENO1/MTOR	2
GO:0014020	primary neural tube formation	2/29	87/18986	0.0229885	15.0503	5.13744	0.00777678	0.169894	0.133339	SKI/MTHFR	2
GO:0022406	membrane docking	2/29	90/18986	0.0222222	14.5487	5.03909	0.00830208	0.169894	0.133339	TPRG1L/VAMP3	2
GO:0060021	roof of mouth development	2/29	92/18986	0.0217391	14.2324	4.97611	0.00866095	0.169894	0.133339	SKI/DHRS3	2
GO:0140029	exocytic process	2/29	92/18986	0.0217391	14.2324	4.97611	0.00866095	0.169894	0.133339	TPRG1L/VAMP3	2
GO:0001841	neural tube formation	2/29	94/18986	0.0212766	13.9296	4.91506	0.00902671	0.169894	0.133339	SKI/MTHFR	2
GO:0006096	glycolytic process	2/29	96/18986	0.0208333	13.6394	4.85584	0.0093993	0.169894	0.133339	ENO1/MTOR	2
GO:0046032	ADP catabolic process	2/29	98/18986	0.0204082	13.361	4.79837	0.0097787	0.169894	0.133339	ENO1/MTOR	2
GO:0019364	pyridine nucleotide catabolic process	2/29	100/18986	0.02	13.0938	4.74255	0.0101648	0.169894	0.133339	ENO1/MTOR	2
GO:0060349	bone morphogenesis	2/29	100/18986	0.02	13.0938	4.74255	0.0101648	0.169894	0.133339	SKI/DHRS3	2
GO:0009137	purine nucleoside diphosphate catabolic process	2/29	101/18986	0.019802	12.9642	4.71524	0.0103604	0.169894	0.133339	ENO1/MTOR	2
GO:0009181	purine ribonucleoside diphosphate catabolic process	2/29	101/18986	0.019802	12.9642	4.71524	0.0103604	0.169894	0.133339	ENO1/MTOR	2
GO:0034446	substrate adhesion-dependent cell spreading	2/29	101/18986	0.019802	12.9642	4.71524	0.0103604	0.169894	0.133339	VAMP3/RCC2	2
GO:0072526	pyridine-containing compound catabolic process	2/29	103/18986	0.0194175	12.7124	4.66175	0.0107567	0.169894	0.133339	ENO1/MTOR	2
GO:0009191	ribonucleoside diphosphate catabolic process	2/29	104/18986	0.0192308	12.5902	4.63556	0.0109573	0.169894	0.133339	ENO1/MTOR	2
GO:0046031	ADP metabolic process	2/29	104/18986	0.0192308	12.5902	4.63556	0.0109573	0.169894	0.133339	ENO1/MTOR	2
GO:0009134	nucleoside diphosphate catabolic process	2/29	108/18986	0.0185185	12.1239	4.5343	0.0117762	0.169894	0.133339	ENO1/MTOR	2
GO:0014013	regulation of gliogenesis	2/29	112/18986	0.0178571	11.6909	4.43823	0.0126213	0.169894	0.133339	SKI/MTOR	2
GO:1901293	nucleoside phosphate biosynthetic process	3/29	321/18986	0.00934579	6.11859	3.6175	0.0126387	0.169894	0.133339	PANK4/ACOT7/ENO1	3
GO:0120034	positive regulation of plasma membrane bounded cell projection assembly	2/29	113/18986	0.0176991	11.5874	4.41498	0.0128367	0.169894	0.133339	WRAP73/MTOR	2
GO:0001838	embryonic epithelial tube formation	2/29	115/18986	0.0173913	11.3859	4.36934	0.0132722	0.169894	0.133339	SKI/MTHFR	2
GO:0009135	purine nucleoside diphosphate metabolic process	2/29	116/18986	0.0172414	11.2878	4.34693	0.0134923	0.169894	0.133339	ENO1/MTOR	2
GO:0009179	purine ribonucleoside diphosphate metabolic process	2/29	116/18986	0.0172414	11.2878	4.34693	0.0134923	0.169894	0.133339	ENO1/MTOR	2
GO:0006766	vitamin metabolic process	2/29	117/18986	0.017094	11.1913	4.32481	0.0137141	0.169894	0.133339	PANK4/UBIAD1	2
GO:0006790	sulfur compound metabolic process	3/29	338/18986	0.00887574	5.81085	3.49047	0.0145088	0.169894	0.133339	PANK4/ACOT7/MTHFR	3
GO:1900038	negative regulation of cellular response to hypoxia	1/29	10/18986	0.1	65.469	7.97568	0.0151734	0.169894	0.133339	ENO1	1
GO:1901838	positive regulation of transcription of nucleolar large rRNA by RNA polymerase I	1/29	10/18986	0.1	65.469	7.97568	0.0151734	0.169894	0.133339	MTOR	1
GO:2001171	positive regulation of ATP biosynthetic process	1/29	10/18986	0.1	65.469	7.97568	0.0151734	0.169894	0.133339	ENO1	1
GO:0006090	pyruvate metabolic process	2/29	126/18986	0.015873	10.3919	4.13702	0.0157809	0.169894	0.133339	ENO1/MTOR	2
GO:0009185	ribonucleoside diphosphate metabolic process	2/29	126/18986	0.015873	10.3919	4.13702	0.0157809	0.169894	0.133339	ENO1/MTOR	2
GO:1905037	autophagosome organization	2/29	127/18986	0.015748	10.3101	4.11732	0.0160183	0.169894	0.133339	MTOR/DNAJC16	2
GO:0072175	epithelial tube formation	2/29	128/18986	0.015625	10.2295	4.09785	0.0162573	0.169894	0.133339	SKI/MTHFR	2
GO:0009154	purine ribonucleotide catabolic process	2/29	129/18986	0.0155039	10.1502	4.07859	0.0164978	0.169894	0.133339	ENO1/MTOR	2
GO:0043200	response to amino acid	2/29	129/18986	0.0155039	10.1502	4.07859	0.0164978	0.169894	0.133339	MTOR/MTHFR	2
GO:0010624	regulation of Schwann cell proliferation	1/29	11/18986	0.0909091	59.5172	7.59292	0.0166785	0.169894	0.133339	SKI	1
GO:0014010	Schwann cell proliferation	1/29	11/18986	0.0909091	59.5172	7.59292	0.0166785	0.169894	0.133339	SKI	1
GO:0042373	vitamin K metabolic process	1/29	11/18986	0.0909091	59.5172	7.59292	0.0166785	0.169894	0.133339	UBIAD1	1
GO:0051593	response to folic acid	1/29	11/18986	0.0909091	59.5172	7.59292	0.0166785	0.169894	0.133339	MTHFR	1
GO:0051987	positive regulation of attachment of spindle microtubules to kinetochore	1/29	11/18986	0.0909091	59.5172	7.59292	0.0166785	0.169894	0.133339	RCC2	1
GO:0071028	nuclear mRNA surveillance	1/29	11/18986	0.0909091	59.5172	7.59292	0.0166785	0.169894	0.133339	EXOSC10	1
GO:0071044	histone mRNA catabolic process	1/29	11/18986	0.0909091	59.5172	7.59292	0.0166785	0.169894	0.133339	EXOSC10	1
GO:1902855	regulation of non-motile cilium assembly	1/29	11/18986	0.0909091	59.5172	7.59292	0.0166785	0.169894	0.133339	WRAP73	1
GO:1903689	regulation of wound healing, spreading of epidermal cells	1/29	11/18986	0.0909091	59.5172	7.59292	0.0166785	0.169894	0.133339	MTOR	1
GO:0032535	regulation of cellular component size	3/29	361/18986	0.00831025	5.44063	3.33173	0.017278	0.169894	0.133339	MTOR/CLCN6/DNAJC16	3
GO:0009132	nucleoside diphosphate metabolic process	2/29	133/18986	0.0150376	9.84496	4.0036	0.0174752	0.169894	0.133339	ENO1/MTOR	2
GO:0014902	myotube differentiation	2/29	133/18986	0.0150376	9.84496	4.0036	0.0174752	0.169894	0.133339	SKI/MTOR	2
GO:0009261	ribonucleotide catabolic process	2/29	135/18986	0.0148148	9.69911	3.96729	0.017973	0.169894	0.133339	ENO1/MTOR	2
GO:0009086	methionine biosynthetic process	1/29	12/18986	0.0833333	54.5575	7.25856	0.0181813	0.169894	0.133339	MTHFR	1
GO:0031126	sno(s)RNA 3'-end processing	1/29	12/18986	0.0833333	54.5575	7.25856	0.0181813	0.169894	0.133339	EXOSC10	1
GO:0051549	positive regulation of keratinocyte migration	1/29	12/18986	0.0833333	54.5575	7.25856	0.0181813	0.169894	0.133339	MTOR	1
GO:0071233	cellular response to L-leucine	1/29	12/18986	0.0833333	54.5575	7.25856	0.0181813	0.169894	0.133339	MTOR	1
GO:1904872	regulation of telomerase RNA localization to Cajal body	1/29	12/18986	0.0833333	54.5575	7.25856	0.0181813	0.169894	0.133339	EXOSC10	1
GO:1905671	regulation of lysosome organization	1/29	12/18986	0.0833333	54.5575	7.25856	0.0181813	0.169894	0.133339	MTOR	1
GO:1990253	cellular response to leucine starvation	1/29	12/18986	0.0833333	54.5575	7.25856	0.0181813	0.169894	0.133339	MTOR	1
GO:0006195	purine nucleotide catabolic process	2/29	138/18986	0.0144928	9.48826	3.91422	0.0187309	0.169894	0.133339	ENO1/MTOR	2
GO:0016081	synaptic vesicle docking	1/29	13/18986	0.0769231	50.3607	6.96314	0.0196819	0.169894	0.133339	TPRG1L	1
GO:0030810	positive regulation of nucleotide biosynthetic process	1/29	13/18986	0.0769231	50.3607	6.96314	0.0196819	0.169894	0.133339	ENO1	1
GO:0031125	rRNA 3'-end processing	1/29	13/18986	0.0769231	50.3607	6.96314	0.0196819	0.169894	0.133339	EXOSC10	1
GO:0042362	fat-soluble vitamin biosynthetic process	1/29	13/18986	0.0769231	50.3607	6.96314	0.0196819	0.169894	0.133339	UBIAD1	1
GO:0070828	heterochromatin organization	1/29	13/18986	0.0769231	50.3607	6.96314	0.0196819	0.169894	0.133339	MTHFR	1
GO:1900373	positive regulation of purine nucleotide biosynthetic process	1/29	13/18986	0.0769231	50.3607	6.96314	0.0196819	0.169894	0.133339	ENO1	1
GO:0035148	tube formation	2/29	142/18986	0.0140845	9.22098	3.84592	0.0197623	0.169894	0.133339	SKI/MTHFR	2
GO:0016331	morphogenesis of embryonic epithelium	2/29	143/18986	0.013986	9.1565	3.82927	0.0200238	0.169894	0.133339	SKI/MTHFR	2
GO:0001101	response to acid chemical	2/29	144/18986	0.0138889	9.09291	3.81278	0.0202868	0.169894	0.133339	MTOR/MTHFR	2
GO:0001921	positive regulation of receptor recycling	1/29	14/18986	0.0714286	46.7635	6.69957	0.0211803	0.169894	0.133339	VAMP3	1
GO:0043144	sno(s)RNA processing	1/29	14/18986	0.0714286	46.7635	6.69957	0.0211803	0.169894	0.133339	EXOSC10	1
GO:0046500	S-adenosylmethionine metabolic process	1/29	14/18986	0.0714286	46.7635	6.69957	0.0211803	0.169894	0.133339	MTHFR	1
GO:0050667	homocysteine metabolic process	1/29	14/18986	0.0714286	46.7635	6.69957	0.0211803	0.169894	0.133339	MTHFR	1
GO:0051547	regulation of keratinocyte migration	1/29	14/18986	0.0714286	46.7635	6.69957	0.0211803	0.169894	0.133339	MTOR	1
GO:1900025	negative regulation of substrate adhesion-dependent cell spreading	1/29	14/18986	0.0714286	46.7635	6.69957	0.0211803	0.169894	0.133339	RCC2	1
GO:0021915	neural tube development	2/29	151/18986	0.013245	8.67139	3.70168	0.0221684	0.169894	0.133339	SKI/MTHFR	2
GO:0034501	protein localization to kinetochore	1/29	15/18986	0.0666667	43.646	6.46246	0.0226765	0.169894	0.133339	RCC2	1
GO:0043201	response to L-leucine	1/29	15/18986	0.0666667	43.646	6.46246	0.0226765	0.169894	0.133339	MTOR	1
GO:0051791	medium-chain fatty acid metabolic process	1/29	15/18986	0.0666667	43.646	6.46246	0.0226765	0.169894	0.133339	ACOT7	1
GO:0070885	negative regulation of calcineurin-NFAT signaling cascade	1/29	15/18986	0.0666667	43.646	6.46246	0.0226765	0.169894	0.133339	MTOR	1
GO:0071027	nuclear RNA surveillance	1/29	15/18986	0.0666667	43.646	6.46246	0.0226765	0.169894	0.133339	EXOSC10	1
GO:0106057	negative regulation of calcineurin-mediated signaling	1/29	15/18986	0.0666667	43.646	6.46246	0.0226765	0.169894	0.133339	MTOR	1
GO:1901836	regulation of transcription of nucleolar large rRNA by RNA polymerase I	1/29	15/18986	0.0666667	43.646	6.46246	0.0226765	0.169894	0.133339	MTOR	1
GO:1903083	protein localization to condensed chromosome	1/29	15/18986	0.0666667	43.646	6.46246	0.0226765	0.169894	0.133339	RCC2	1
GO:0062013	positive regulation of small molecule metabolic process	2/29	153/18986	0.0130719	8.55803	3.67125	0.0227189	0.169894	0.133339	ENO1/MTOR	2
GO:0071456	cellular response to hypoxia	2/29	156/18986	0.0128205	8.39346	3.62664	0.0235553	0.169894	0.133339	ENO1/MTOR	2
GO:0042552	myelination	2/29	158/18986	0.0126582	8.28721	3.59755	0.0241199	0.169894	0.133339	SKI/MTOR	2
GO:0006206	pyrimidine nucleobase metabolic process	1/29	16/18986	0.0625	40.9181	6.24764	0.0241705	0.169894	0.133339	MTOR	1
GO:0006555	methionine metabolic process	1/29	16/18986	0.0625	40.9181	6.24764	0.0241705	0.169894	0.133339	MTHFR	1
GO:0016074	sno(s)RNA metabolic process	1/29	16/18986	0.0625	40.9181	6.24764	0.0241705	0.169894	0.133339	EXOSC10	1
GO:0016078	tRNA decay	1/29	16/18986	0.0625	40.9181	6.24764	0.0241705	0.169894	0.133339	EXOSC10	1
GO:0043584	nose development	1/29	16/18986	0.0625	40.9181	6.24764	0.0241705	0.169894	0.133339	SKI	1
GO:0048385	regulation of retinoic acid receptor signaling pathway	1/29	16/18986	0.0625	40.9181	6.24764	0.0241705	0.169894	0.133339	DHRS3	1
GO:0051895	negative regulation of focal adhesion assembly	1/29	16/18986	0.0625	40.9181	6.24764	0.0241705	0.169894	0.133339	RCC2	1
GO:0150118	negative regulation of cell-substrate junction organization	1/29	16/18986	0.0625	40.9181	6.24764	0.0241705	0.169894	0.133339	RCC2	1
GO:1900034	regulation of cellular response to heat	1/29	16/18986	0.0625	40.9181	6.24764	0.0241705	0.169894	0.133339	MTOR	1
GO:0007272	ensheathment of neurons	2/29	160/18986	0.0125	8.18362	3.56898	0.0246901	0.169894	0.133339	SKI/MTOR	2
GO:0008366	axon ensheathment	2/29	160/18986	0.0125	8.18362	3.56898	0.0246901	0.169894	0.133339	SKI/MTOR	2
GO:0009166	nucleotide catabolic process	2/29	161/18986	0.0124224	8.13279	3.55488	0.0249772	0.169894	0.133339	ENO1/MTOR	2
GO:0000723	telomere maintenance	2/29	162/18986	0.0123457	8.08259	3.54089	0.0252658	0.169894	0.133339	ZBTB48/EXOSC10	2
GO:0036294	cellular response to decreased oxygen levels	2/29	163/18986	0.0122699	8.033	3.52703	0.0255557	0.169894	0.133339	ENO1/MTOR	2
GO:0000097	sulfur amino acid biosynthetic process	1/29	17/18986	0.0588235	38.5112	6.05177	0.0256623	0.169894	0.133339	MTHFR	1
GO:0006744	ubiquinone biosynthetic process	1/29	17/18986	0.0588235	38.5112	6.05177	0.0256623	0.169894	0.133339	UBIAD1	1
GO:0010831	positive regulation of myotube differentiation	1/29	17/18986	0.0588235	38.5112	6.05177	0.0256623	0.169894	0.133339	MTOR	1
GO:0046112	nucleobase biosynthetic process	1/29	17/18986	0.0588235	38.5112	6.05177	0.0256623	0.169894	0.133339	MTOR	1
GO:0060253	negative regulation of glial cell proliferation	1/29	17/18986	0.0588235	38.5112	6.05177	0.0256623	0.169894	0.133339	SKI	1
GO:1901663	quinone biosynthetic process	1/29	17/18986	0.0588235	38.5112	6.05177	0.0256623	0.169894	0.133339	UBIAD1	1
GO:2001169	regulation of ATP biosynthetic process	1/29	17/18986	0.0588235	38.5112	6.05177	0.0256623	0.169894	0.133339	ENO1	1
GO:0007584	response to nutrient	2/29	168/18986	0.0119048	7.79392	3.45946	0.0270258	0.169894	0.133339	MTOR/MTHFR	2
GO:0006735	NADH regeneration	1/29	18/18986	0.0555556	36.3716	5.87219	0.0271519	0.169894	0.133339	ENO1	1
GO:0010755	regulation of plasminogen activation	1/29	18/18986	0.0555556	36.3716	5.87219	0.0271519	0.169894	0.133339	ENO1	1
GO:0032926	negative regulation of activin receptor signaling pathway	1/29	18/18986	0.0555556	36.3716	5.87219	0.0271519	0.169894	0.133339	SKI	1
GO:0045475	locomotor rhythm	1/29	18/18986	0.0555556	36.3716	5.87219	0.0271519	0.169894	0.133339	MTOR	1
GO:0046653	tetrahydrofolate metabolic process	1/29	18/18986	0.0555556	36.3716	5.87219	0.0271519	0.169894	0.133339	MTHFR	1
GO:0061621	canonical glycolysis	1/29	18/18986	0.0555556	36.3716	5.87219	0.0271519	0.169894	0.133339	ENO1	1
GO:0061718	glucose catabolic process to pyruvate	1/29	18/18986	0.0555556	36.3716	5.87219	0.0271519	0.169894	0.133339	ENO1	1
GO:0071025	RNA surveillance	1/29	18/18986	0.0555556	36.3716	5.87219	0.0271519	0.169894	0.133339	EXOSC10	1
GO:1901569	fatty acid derivative catabolic process	1/29	18/18986	0.0555556	36.3716	5.87219	0.0271519	0.169894	0.133339	ACOT7	1
GO:0019362	pyridine nucleotide metabolic process	2/29	172/18986	0.0116279	7.61267	3.40738	0.0282262	0.169894	0.133339	ENO1/MTOR	2
GO:0046496	nicotinamide nucleotide metabolic process	2/29	172/18986	0.0116279	7.61267	3.40738	0.0282262	0.169894	0.133339	ENO1/MTOR	2
GO:0006743	ubiquinone metabolic process	1/29	19/18986	0.0526316	34.4574	5.70675	0.0286393	0.169894	0.133339	UBIAD1	1
GO:0045945	positive regulation of transcription by RNA polymerase III	1/29	19/18986	0.0526316	34.4574	5.70675	0.0286393	0.169894	0.133339	MTOR	1
GO:0090670	RNA localization to Cajal body	1/29	19/18986	0.0526316	34.4574	5.70675	0.0286393	0.169894	0.133339	EXOSC10	1
GO:0090671	telomerase RNA localization to Cajal body	1/29	19/18986	0.0526316	34.4574	5.70675	0.0286393	0.169894	0.133339	EXOSC10	1
GO:0090672	telomerase RNA localization	1/29	19/18986	0.0526316	34.4574	5.70675	0.0286393	0.169894	0.133339	EXOSC10	1
GO:0090685	RNA localization to nucleus	1/29	19/18986	0.0526316	34.4574	5.70675	0.0286393	0.169894	0.133339	EXOSC10	1
GO:0043604	amide biosynthetic process	2/29	175/18986	0.0114286	7.48217	3.3694	0.0291405	0.169894	0.133339	PANK4/ACOT7	2
GO:0071897	DNA biosynthetic process	2/29	175/18986	0.0114286	7.48217	3.3694	0.0291405	0.169894	0.133339	FAAP20/EXOSC10	2
GO:0055002	striated muscle cell development	2/29	177/18986	0.0112994	7.39762	3.34458	0.0297566	0.169894	0.133339	SKI/MTOR	2
GO:0071453	cellular response to oxygen levels	2/29	178/18986	0.011236	7.35606	3.33232	0.0300666	0.169894	0.133339	ENO1/MTOR	2
GO:0072524	pyridine-containing compound metabolic process	2/29	178/18986	0.011236	7.35606	3.33232	0.0300666	0.169894	0.133339	ENO1/MTOR	2
GO:0006098	pentose-phosphate shunt	1/29	20/18986	0.05	32.7345	5.55364	0.0301244	0.169894	0.133339	MTOR	1
GO:0008334	histone mRNA metabolic process	1/29	20/18986	0.05	32.7345	5.55364	0.0301244	0.169894	0.133339	EXOSC10	1
GO:0034260	negative regulation of GTPase activity	1/29	20/18986	0.05	32.7345	5.55364	0.0301244	0.169894	0.133339	RCC2	1
GO:0048266	behavioral response to pain	1/29	20/18986	0.05	32.7345	5.55364	0.0301244	0.169894	0.133339	MTOR	1
GO:0051546	keratinocyte migration	1/29	20/18986	0.05	32.7345	5.55364	0.0301244	0.169894	0.133339	MTOR	1
GO:0061620	glycolytic process through glucose-6-phosphate	1/29	20/18986	0.05	32.7345	5.55364	0.0301244	0.169894	0.133339	ENO1	1
GO:0070314	G1 to G0 transition	1/29	20/18986	0.05	32.7345	5.55364	0.0301244	0.169894	0.133339	ZBTB17	1
GO:1900037	regulation of cellular response to hypoxia	1/29	20/18986	0.05	32.7345	5.55364	0.0301244	0.169894	0.133339	ENO1	1
GO:0008361	regulation of cell size	2/29	179/18986	0.0111732	7.31497	3.32015	0.0303779	0.170267	0.133631	MTOR/CLCN6	2
GO:0016052	carbohydrate catabolic process	2/29	180/18986	0.0111111	7.27433	3.30807	0.0306906	0.170963	0.134178	ENO1/MTOR	2
GO:0007398	ectoderm development	1/29	21/18986	0.047619	31.1757	5.41141	0.0316074	0.170986	0.134196	ZBTB17	1
GO:0009067	aspartate family amino acid biosynthetic process	1/29	21/18986	0.047619	31.1757	5.41141	0.0316074	0.170986	0.134196	MTHFR	1
GO:0019677	NAD catabolic process	1/29	21/18986	0.047619	31.1757	5.41141	0.0316074	0.170986	0.134196	ENO1	1
GO:0038166	angiotensin-activated signaling pathway	1/29	21/18986	0.047619	31.1757	5.41141	0.0316074	0.170986	0.134196	AGTRAP	1
GO:0006575	cellular modified amino acid metabolic process	2/29	183/18986	0.010929	7.15508	3.27239	0.0316362	0.170986	0.134196	PANK4/MTHFR	2
GO:0002089	lens morphogenesis in camera-type eye	1/29	22/18986	0.0454545	29.7586	5.27878	0.0330882	0.173665	0.136299	SKI	1
GO:0030808	regulation of nucleotide biosynthetic process	1/29	22/18986	0.0454545	29.7586	5.27878	0.0330882	0.173665	0.136299	ENO1	1
GO:0032211	negative regulation of telomere maintenance via telomerase	1/29	22/18986	0.0454545	29.7586	5.27878	0.0330882	0.173665	0.136299	EXOSC10	1
GO:0050849	negative regulation of calcium-mediated signaling	1/29	22/18986	0.0454545	29.7586	5.27878	0.0330882	0.173665	0.136299	MTOR	1
GO:1900371	regulation of purine nucleotide biosynthetic process	1/29	22/18986	0.0454545	29.7586	5.27878	0.0330882	0.173665	0.136299	ENO1	1
GO:0043484	regulation of RNA splicing	2/29	190/18986	0.0105263	6.89147	3.19218	0.0338873	0.176371	0.138423	CCNL2/EXOSC10	2
GO:0006740	NADPH regeneration	1/29	23/18986	0.0434783	28.4648	5.15473	0.0345668	0.176371	0.138423	MTOR	1
GO:0035493	SNARE complex assembly	1/29	23/18986	0.0434783	28.4648	5.15473	0.0345668	0.176371	0.138423	VAMP3	1
GO:0051988	regulation of attachment of spindle microtubules to kinetochore	1/29	23/18986	0.0434783	28.4648	5.15473	0.0345668	0.176371	0.138423	RCC2	1
GO:0043603	amide metabolic process	3/29	472/18986	0.00635593	4.16116	2.72011	0.034575	0.176371	0.138423	PANK4/ACOT7/MTOR	3
GO:0032200	telomere organization	2/29	193/18986	0.0103627	6.78435	3.15904	0.034871	0.176887	0.138828	ZBTB48/EXOSC10	2
GO:0000466	maturation of 5.8S rRNA from tricistronic rRNA transcript (SSU-rRNA, 5.8S rRNA, LSU-rRNA)	1/29	24/18986	0.0416667	27.2787	5.03834	0.0360433	0.177866	0.139596	EXOSC10	1
GO:0042790	nucleolar large rRNA transcription by RNA polymerase I	1/29	24/18986	0.0416667	27.2787	5.03834	0.0360433	0.177866	0.139596	MTOR	1
GO:0045063	T-helper 1 cell differentiation	1/29	24/18986	0.0416667	27.2787	5.03834	0.0360433	0.177866	0.139596	MTOR	1
GO:0061615	glycolytic process through fructose-6-phosphate	1/29	24/18986	0.0416667	27.2787	5.03834	0.0360433	0.177866	0.139596	ENO1	1
GO:1901661	quinone metabolic process	1/29	24/18986	0.0416667	27.2787	5.03834	0.0360433	0.177866	0.139596	UBIAD1	1
GO:0001919	regulation of receptor recycling	1/29	25/18986	0.04	26.1876	4.92885	0.0375175	0.178356	0.13998	VAMP3	1
GO:0009110	vitamin biosynthetic process	1/29	25/18986	0.04	26.1876	4.92885	0.0375175	0.178356	0.13998	UBIAD1	1
GO:0010954	positive regulation of protein processing	1/29	25/18986	0.04	26.1876	4.92885	0.0375175	0.178356	0.13998	ENO1	1
GO:0030813	positive regulation of nucleotide catabolic process	1/29	25/18986	0.04	26.1876	4.92885	0.0375175	0.178356	0.13998	MTOR	1
GO:0033123	positive regulation of purine nucleotide catabolic process	1/29	25/18986	0.04	26.1876	4.92885	0.0375175	0.178356	0.13998	MTOR	1
GO:0035336	long-chain fatty-acyl-CoA metabolic process	1/29	25/18986	0.04	26.1876	4.92885	0.0375175	0.178356	0.13998	ACOT7	1
GO:0045821	positive regulation of glycolytic process	1/29	25/18986	0.04	26.1876	4.92885	0.0375175	0.178356	0.13998	MTOR	1
GO:0006399	tRNA metabolic process	2/29	203/18986	0.00985222	6.45014	3.05347	0.0382296	0.180794	0.141894	LRRC47/EXOSC10	2
GO:0055001	muscle cell development	2/29	205/18986	0.0097561	6.38722	3.0332	0.0389159	0.181867	0.142736	SKI/MTOR	2
GO:0019985	translesion synthesis	1/29	26/18986	0.0384615	25.1804	4.82558	0.0389896	0.181867	0.142736	FAAP20	1
GO:0002009	morphogenesis of an epithelium	3/29	500/18986	0.006	3.92814	2.59522	0.0399671	0.181867	0.142736	SKI/MTOR/MTHFR	3
GO:0006007	glucose catabolic process	1/29	27/18986	0.037037	24.2478	4.72797	0.0404595	0.181867	0.142736	ENO1	1
GO:0006760	folic acid-containing compound metabolic process	1/29	27/18986	0.037037	24.2478	4.72797	0.0404595	0.181867	0.142736	MTHFR	1
GO:0031639	plasminogen activation	1/29	27/18986	0.037037	24.2478	4.72797	0.0404595	0.181867	0.142736	ENO1	1
GO:0032925	regulation of activin receptor signaling pathway	1/29	27/18986	0.037037	24.2478	4.72797	0.0404595	0.181867	0.142736	SKI	1
GO:0035313	wound healing, spreading of epidermal cells	1/29	27/18986	0.037037	24.2478	4.72797	0.0404595	0.181867	0.142736	MTOR	1
GO:0042759	long-chain fatty acid biosynthetic process	1/29	27/18986	0.037037	24.2478	4.72797	0.0404595	0.181867	0.142736	ACOT7	1
GO:1903319	positive regulation of protein maturation	1/29	27/18986	0.037037	24.2478	4.72797	0.0404595	0.181867	0.142736	ENO1	1
GO:0001702	gastrulation with mouth forming second	1/29	28/18986	0.0357143	23.3818	4.6355	0.0419272	0.183618	0.14411	ZBTB17	1
GO:0002295	T-helper cell lineage commitment	1/29	28/18986	0.0357143	23.3818	4.6355	0.0419272	0.183618	0.14411	MTOR	1
GO:0010592	positive regulation of lamellipodium assembly	1/29	28/18986	0.0357143	23.3818	4.6355	0.0419272	0.183618	0.14411	MTOR	1
GO:0010971	positive regulation of G2/M transition of mitotic cell cycle	1/29	28/18986	0.0357143	23.3818	4.6355	0.0419272	0.183618	0.14411	RCC2	1
GO:0048714	positive regulation of oligodendrocyte differentiation	1/29	28/18986	0.0357143	23.3818	4.6355	0.0419272	0.183618	0.14411	MTOR	1
GO:0031503	protein-containing complex localization	2/29	214/18986	0.00934579	6.11859	2.94525	0.0420622	0.183618	0.14411	KLHL21/RCC2	2
GO:0060348	bone development	2/29	217/18986	0.00921659	6.03401	2.91704	0.0431319	0.18498	0.145179	SKI/DHRS3	2
GO:0022011	myelination in peripheral nervous system	1/29	29/18986	0.0344828	22.5755	4.54773	0.0433928	0.18498	0.145179	SKI	1
GO:0032292	peripheral nervous system axon ensheathment	1/29	29/18986	0.0344828	22.5755	4.54773	0.0433928	0.18498	0.145179	SKI	1
GO:0045948	positive regulation of translational initiation	1/29	29/18986	0.0344828	22.5755	4.54773	0.0433928	0.18498	0.145179	MTOR	1
GO:0051156	glucose 6-phosphate metabolic process	1/29	29/18986	0.0344828	22.5755	4.54773	0.0433928	0.18498	0.145179	MTOR	1
GO:0051984	positive regulation of chromosome segregation	1/29	30/18986	0.0333333	21.823	4.46426	0.0448562	0.189439	0.148679	RCC2	1
GO:1904357	negative regulation of telomere maintenance via telomere lengthening	1/29	30/18986	0.0333333	21.823	4.46426	0.0448562	0.189439	0.148679	EXOSC10	1
GO:0006359	regulation of transcription by RNA polymerase III	1/29	31/18986	0.0322581	21.119	4.38475	0.0463174	0.191165	0.150033	MTOR	1
GO:0043373	CD4-positive, alpha-beta T cell lineage commitment	1/29	31/18986	0.0322581	21.119	4.38475	0.0463174	0.191165	0.150033	MTOR	1
GO:0045724	positive regulation of cilium assembly	1/29	31/18986	0.0322581	21.119	4.38475	0.0463174	0.191165	0.150033	WRAP73	1
GO:1900027	regulation of ruffle assembly	1/29	31/18986	0.0322581	21.119	4.38475	0.0463174	0.191165	0.150033	RCC2	1
GO:1902751	positive regulation of cell cycle G2/M phase transition	1/29	31/18986	0.0322581	21.119	4.38475	0.0463174	0.191165	0.150033	RCC2	1
GO:0046034	ATP metabolic process	2/29	228/18986	0.00877193	5.74289	2.81797	0.0471409	0.191952	0.150651	ENO1/MTOR	2
GO:0045055	regulated exocytosis	2/29	229/18986	0.00873362	5.71781	2.80929	0.047512	0.191952	0.150651	TPRG1L/VAMP3	2
GO:0006734	NADH metabolic process	1/29	32/18986	0.03125	20.4591	4.30889	0.0477765	0.191952	0.150651	ENO1	1
GO:0035767	endothelial cell chemotaxis	1/29	32/18986	0.03125	20.4591	4.30889	0.0477765	0.191952	0.150651	PLEKHG5	1
GO:0060325	face morphogenesis	1/29	32/18986	0.03125	20.4591	4.30889	0.0477765	0.191952	0.150651	SKI	1
GO:2000279	negative regulation of DNA biosynthetic process	1/29	32/18986	0.03125	20.4591	4.30889	0.0477765	0.191952	0.150651	EXOSC10	1
GO:0048705	skeletal system morphogenesis	2/29	232/18986	0.00862069	5.64388	2.78354	0.0486318	0.19324	0.151662	SKI/DHRS3	2
GO:0002363	alpha-beta T cell lineage commitment	1/29	33/18986	0.030303	19.8391	4.2364	0.0492334	0.19324	0.151662	MTOR	1
GO:0042558	pteridine-containing compound metabolic process	1/29	33/18986	0.030303	19.8391	4.2364	0.0492334	0.19324	0.151662	MTHFR	1
GO:1902115	regulation of organelle assembly	2/29	234/18986	0.00854701	5.59564	2.76662	0.0493837	0.19324	0.151662	WRAP73/MTOR	2
GO:0019722	calcium-mediated signaling	2/29	235/18986	0.00851064	5.57183	2.75823	0.0497613	0.19324	0.151662	TPRG1L/MTOR	2
GO:0000096	sulfur amino acid metabolic process	1/29	34/18986	0.0294118	19.2556	4.16703	0.0506882	0.19324	0.151662	MTHFR	1
GO:0006516	glycoprotein catabolic process	1/29	34/18986	0.0294118	19.2556	4.16703	0.0506882	0.19324	0.151662	FBXO6	1
GO:0009112	nucleobase metabolic process	1/29	34/18986	0.0294118	19.2556	4.16703	0.0506882	0.19324	0.151662	MTOR	1
GO:1901889	negative regulation of cell junction assembly	1/29	34/18986	0.0294118	19.2556	4.16703	0.0506882	0.19324	0.151662	RCC2	1
GO:0007033	vacuole organization	2/29	240/18986	0.00833333	5.45575	2.71701	0.0516652	0.19324	0.151662	MTOR/DNAJC16	2
GO:0001667	ameboidal-type cell migration	2/29	241/18986	0.00829876	5.43311	2.7089	0.0520492	0.19324	0.151662	MTOR/RCC2	2
GO:0000460	maturation of 5.8S rRNA	1/29	35/18986	0.0285714	18.7054	4.10056	0.0521408	0.19324	0.151662	EXOSC10	1
GO:0006884	cell volume homeostasis	1/29	35/18986	0.0285714	18.7054	4.10056	0.0521408	0.19324	0.151662	CLCN6	1
GO:0021772	olfactory bulb development	1/29	35/18986	0.0285714	18.7054	4.10056	0.0521408	0.19324	0.151662	SKI	1
GO:0043276	anoikis	1/29	35/18986	0.0285714	18.7054	4.10056	0.0521408	0.19324	0.151662	MTOR	1
GO:0043369	CD4-positive or CD8-positive, alpha-beta T cell lineage commitment	1/29	35/18986	0.0285714	18.7054	4.10056	0.0521408	0.19324	0.151662	MTOR	1
GO:0048147	negative regulation of fibroblast proliferation	1/29	35/18986	0.0285714	18.7054	4.10056	0.0521408	0.19324	0.151662	SKI	1
GO:0048384	retinoic acid receptor signaling pathway	1/29	35/18986	0.0285714	18.7054	4.10056	0.0521408	0.19324	0.151662	DHRS3	1
GO:0051647	nucleus localization	1/29	35/18986	0.0285714	18.7054	4.10056	0.0521408	0.19324	0.151662	MTOR	1
GO:0006301	postreplication repair	1/29	36/18986	0.0277778	18.1858	4.03679	0.0535913	0.194644	0.152763	FAAP20	1
GO:0045943	positive regulation of transcription by RNA polymerase I	1/29	36/18986	0.0277778	18.1858	4.03679	0.0535913	0.194644	0.152763	MTOR	1
GO:0048026	positive regulation of mRNA splicing, via spliceosome	1/29	36/18986	0.0277778	18.1858	4.03679	0.0535913	0.194644	0.152763	EXOSC10	1
GO:1902745	positive regulation of lamellipodium organization	1/29	36/18986	0.0277778	18.1858	4.03679	0.0535913	0.194644	0.152763	MTOR	1
GO:2000765	regulation of cytoplasmic translation	1/29	36/18986	0.0277778	18.1858	4.03679	0.0535913	0.194644	0.152763	MTOR	1
GO:0016242	negative regulation of macroautophagy	1/29	37/18986	0.027027	17.6943	3.97554	0.0550396	0.195984	0.153816	MTOR	1
GO:0021988	olfactory lobe development	1/29	37/18986	0.027027	17.6943	3.97554	0.0550396	0.195984	0.153816	SKI	1
GO:0043388	positive regulation of DNA binding	1/29	37/18986	0.027027	17.6943	3.97554	0.0550396	0.195984	0.153816	SKI	1
GO:0048265	response to pain	1/29	37/18986	0.027027	17.6943	3.97554	0.0550396	0.195984	0.153816	MTOR	1
GO:1904385	cellular response to angiotensin	1/29	37/18986	0.027027	17.6943	3.97554	0.0550396	0.195984	0.153816	AGTRAP	1
GO:0009205	purine ribonucleoside triphosphate metabolic process	2/29	252/18986	0.00793651	5.19595	2.62262	0.0563405	0.197746	0.155198	ENO1/MTOR	2
GO:0048738	cardiac muscle tissue development	2/29	252/18986	0.00793651	5.19595	2.62262	0.0563405	0.197746	0.155198	SKI/MTOR	2
GO:1900181	negative regulation of protein localization to nucleus	1/29	38/18986	0.0263158	17.2287	3.91663	0.0564858	0.197746	0.155198	MTOR	1
GO:0019228	neuronal action potential	1/29	39/18986	0.025641	16.7869	3.85992	0.0579298	0.197746	0.155198	MTOR	1
GO:0032205	negative regulation of telomere maintenance	1/29	39/18986	0.025641	16.7869	3.85992	0.0579298	0.197746	0.155198	EXOSC10	1
GO:0048741	skeletal muscle fiber development	1/29	39/18986	0.025641	16.7869	3.85992	0.0579298	0.197746	0.155198	SKI	1
GO:0050685	positive regulation of mRNA processing	1/29	39/18986	0.025641	16.7869	3.85992	0.0579298	0.197746	0.155198	EXOSC10	1
GO:0060323	head morphogenesis	1/29	39/18986	0.025641	16.7869	3.85992	0.0579298	0.197746	0.155198	SKI	1
GO:0060392	negative regulation of SMAD protein signal transduction	1/29	39/18986	0.025641	16.7869	3.85992	0.0579298	0.197746	0.155198	SKI	1
GO:0070884	regulation of calcineurin-NFAT signaling cascade	1/29	39/18986	0.025641	16.7869	3.85992	0.0579298	0.197746	0.155198	MTOR	1
GO:0090630	activation of GTPase activity	1/29	39/18986	0.025641	16.7869	3.85992	0.0579298	0.197746	0.155198	RCC2	1
GO:0009199	ribonucleoside triphosphate metabolic process	2/29	258/18986	0.00775194	5.07511	2.57765	0.0587328	0.198068	0.155451	ENO1/MTOR	2
GO:0009144	purine nucleoside triphosphate metabolic process	2/29	259/18986	0.00772201	5.05552	2.57029	0.0591349	0.198068	0.155451	ENO1/MTOR	2
GO:0001953	negative regulation of cell-matrix adhesion	1/29	40/18986	0.025	16.3672	3.80528	0.0593718	0.198068	0.155451	RCC2	1
GO:0006730	one-carbon metabolic process	1/29	40/18986	0.025	16.3672	3.80528	0.0593718	0.198068	0.155451	MTHFR	1
GO:0009303	rRNA transcription	1/29	40/18986	0.025	16.3672	3.80528	0.0593718	0.198068	0.155451	MTOR	1
GO:0106056	regulation of calcineurin-mediated signaling	1/29	40/18986	0.025	16.3672	3.80528	0.0593718	0.198068	0.155451	MTOR	1
GO:0002360	T cell lineage commitment	1/29	41/18986	0.0243902	15.968	3.75257	0.0608116	0.198068	0.155451	MTOR	1
GO:0006418	tRNA aminoacylation for protein translation	1/29	41/18986	0.0243902	15.968	3.75257	0.0608116	0.198068	0.155451	LRRC47	1
GO:0010591	regulation of lamellipodium assembly	1/29	41/18986	0.0243902	15.968	3.75257	0.0608116	0.198068	0.155451	MTOR	1
GO:0010762	regulation of fibroblast migration	1/29	41/18986	0.0243902	15.968	3.75257	0.0608116	0.198068	0.155451	RCC2	1
GO:0035337	fatty-acyl-CoA metabolic process	1/29	41/18986	0.0243902	15.968	3.75257	0.0608116	0.198068	0.155451	ACOT7	1
GO:0071459	protein localization to chromosome, centromeric region	1/29	41/18986	0.0243902	15.968	3.75257	0.0608116	0.198068	0.155451	RCC2	1
GO:0014044	Schwann cell development	1/29	42/18986	0.0238095	15.5878	3.70169	0.0622492	0.198068	0.155451	SKI	1
GO:0036297	interstrand cross-link repair	1/29	42/18986	0.0238095	15.5878	3.70169	0.0622492	0.198068	0.155451	FAAP20	1
GO:0043001	Golgi to plasma membrane protein transport	1/29	42/18986	0.0238095	15.5878	3.70169	0.0622492	0.198068	0.155451	VAMP3	1
GO:0044319	wound healing, spreading of cells	1/29	42/18986	0.0238095	15.5878	3.70169	0.0622492	0.198068	0.155451	MTOR	1
GO:0060251	regulation of glial cell proliferation	1/29	42/18986	0.0238095	15.5878	3.70169	0.0622492	0.198068	0.155451	SKI	1
GO:0072528	pyrimidine-containing compound biosynthetic process	1/29	42/18986	0.0238095	15.5878	3.70169	0.0622492	0.198068	0.155451	MTOR	1
GO:0090505	epiboly involved in wound healing	1/29	42/18986	0.0238095	15.5878	3.70169	0.0622492	0.198068	0.155451	MTOR	1
GO:0010001	glial cell differentiation	2/29	267/18986	0.00749064	4.90404	2.51274	0.062387	0.198068	0.155451	SKI/MTOR	2
GO:0016072	rRNA metabolic process	2/29	268/18986	0.00746269	4.88574	2.50571	0.0627978	0.198677	0.155929	EXOSC10/MTOR	2
GO:0009066	aspartate family amino acid metabolic process	1/29	43/18986	0.0232558	15.2253	3.65252	0.0636848	0.199399	0.156496	MTHFR	1
GO:0014904	myotube cell development	1/29	43/18986	0.0232558	15.2253	3.65252	0.0636848	0.199399	0.156496	SKI	1
GO:0090504	epiboly	1/29	43/18986	0.0232558	15.2253	3.65252	0.0636848	0.199399	0.156496	MTOR	1
GO:0043039	tRNA aminoacylation	1/29	44/18986	0.0227273	14.8793	3.60496	0.0651182	0.201621	0.158239	LRRC47	1
GO:0097178	ruffle assembly	1/29	44/18986	0.0227273	14.8793	3.60496	0.0651182	0.201621	0.158239	RCC2	1
GO:0003007	heart morphogenesis	2/29	274/18986	0.00729927	4.77876	2.46424	0.0652824	0.201621	0.158239	MTOR/DHRS3	2
GO:0009141	nucleoside triphosphate metabolic process	2/29	274/18986	0.00729927	4.77876	2.46424	0.0652824	0.201621	0.158239	ENO1/MTOR	2
GO:0000184	nuclear-transcribed mRNA catabolic process, nonsense-mediated decay	1/29	45/18986	0.0222222	14.5487	3.55894	0.0665495	0.202097	0.158613	EXOSC10	1
GO:0002183	cytoplasmic translational initiation	1/29	45/18986	0.0222222	14.5487	3.55894	0.0665495	0.202097	0.158613	MTOR	1
GO:0014014	negative regulation of gliogenesis	1/29	45/18986	0.0222222	14.5487	3.55894	0.0665495	0.202097	0.158613	SKI	1
GO:0043038	amino acid activation	1/29	45/18986	0.0222222	14.5487	3.55894	0.0665495	0.202097	0.158613	LRRC47	1
GO:1990776	response to angiotensin	1/29	45/18986	0.0222222	14.5487	3.55894	0.0665495	0.202097	0.158613	AGTRAP	1
GO:0006739	NADP metabolic process	1/29	46/18986	0.0217391	14.2324	3.51436	0.0679786	0.202376	0.158832	MTOR	1
GO:0030890	positive regulation of B cell proliferation	1/29	46/18986	0.0217391	14.2324	3.51436	0.0679786	0.202376	0.158832	TNFRSF4	1
GO:0031146	SCF-dependent proteasomal ubiquitin-dependent protein catabolic process	1/29	46/18986	0.0217391	14.2324	3.51436	0.0679786	0.202376	0.158832	FBXO6	1
GO:0045687	positive regulation of glial cell differentiation	1/29	46/18986	0.0217391	14.2324	3.51436	0.0679786	0.202376	0.158832	MTOR	1
GO:0048512	circadian behavior	1/29	46/18986	0.0217391	14.2324	3.51436	0.0679786	0.202376	0.158832	MTOR	1
GO:0048713	regulation of oligodendrocyte differentiation	1/29	46/18986	0.0217391	14.2324	3.51436	0.0679786	0.202376	0.158832	MTOR	1
GO:0000731	DNA synthesis involved in DNA repair	1/29	47/18986	0.0212766	13.9296	3.47115	0.0694057	0.203526	0.159735	FAAP20	1
GO:0006775	fat-soluble vitamin metabolic process	1/29	47/18986	0.0212766	13.9296	3.47115	0.0694057	0.203526	0.159735	UBIAD1	1
GO:0010830	regulation of myotube differentiation	1/29	47/18986	0.0212766	13.9296	3.47115	0.0694057	0.203526	0.159735	MTOR	1
GO:0031641	regulation of myelination	1/29	47/18986	0.0212766	13.9296	3.47115	0.0694057	0.203526	0.159735	MTOR	1
GO:0001881	receptor recycling	1/29	48/18986	0.0208333	13.6394	3.42924	0.0708307	0.203526	0.159735	VAMP3	1
GO:0006356	regulation of transcription by RNA polymerase I	1/29	48/18986	0.0208333	13.6394	3.42924	0.0708307	0.203526	0.159735	MTOR	1
GO:0007622	rhythmic behavior	1/29	48/18986	0.0208333	13.6394	3.42924	0.0708307	0.203526	0.159735	MTOR	1
GO:0010634	positive regulation of epithelial cell migration	1/29	48/18986	0.0208333	13.6394	3.42924	0.0708307	0.203526	0.159735	MTOR	1
GO:0031295	T cell costimulation	1/29	48/18986	0.0208333	13.6394	3.42924	0.0708307	0.203526	0.159735	MTOR	1
GO:0032210	regulation of telomere maintenance via telomerase	1/29	48/18986	0.0208333	13.6394	3.42924	0.0708307	0.203526	0.159735	EXOSC10	1
GO:0045292	mRNA cis splicing, via spliceosome	1/29	48/18986	0.0208333	13.6394	3.42924	0.0708307	0.203526	0.159735	EXOSC10	1
GO:0006520	amino acid metabolic process	2/29	289/18986	0.00692042	4.53072	2.36563	0.0716375	0.203746	0.159907	LRRC47/MTHFR	2
GO:0014037	Schwann cell differentiation	1/29	49/18986	0.0204082	13.361	3.38857	0.0722535	0.203746	0.159907	SKI	1
GO:0031294	lymphocyte costimulation	1/29	49/18986	0.0204082	13.361	3.38857	0.0722535	0.203746	0.159907	MTOR	1
GO:0042088	T-helper 1 type immune response	1/29	49/18986	0.0204082	13.361	3.38857	0.0722535	0.203746	0.159907	MTOR	1
GO:0044273	sulfur compound catabolic process	1/29	49/18986	0.0204082	13.361	3.38857	0.0722535	0.203746	0.159907	ACOT7	1
GO:2000785	regulation of autophagosome assembly	1/29	49/18986	0.0204082	13.361	3.38857	0.0722535	0.203746	0.159907	MTOR	1
GO:0019320	hexose catabolic process	1/29	50/18986	0.02	13.0938	3.34906	0.0736743	0.204576	0.160558	ENO1	1
GO:0031670	cellular response to nutrient	1/29	50/18986	0.02	13.0938	3.34906	0.0736743	0.204576	0.160558	MTOR	1
GO:0033120	positive regulation of RNA splicing	1/29	50/18986	0.02	13.0938	3.34906	0.0736743	0.204576	0.160558	EXOSC10	1
GO:0042181	ketone biosynthetic process	1/29	50/18986	0.02	13.0938	3.34906	0.0736743	0.204576	0.160558	UBIAD1	1
GO:0043368	positive T cell selection	1/29	50/18986	0.02	13.0938	3.34906	0.0736743	0.204576	0.160558	MTOR	1
GO:0045933	positive regulation of muscle contraction	1/29	51/18986	0.0196078	12.8371	3.31067	0.0750929	0.206619	0.162162	ENO1	1
GO:0051155	positive regulation of striated muscle cell differentiation	1/29	51/18986	0.0196078	12.8371	3.31067	0.0750929	0.206619	0.162162	MTOR	1
GO:0051496	positive regulation of stress fiber assembly	1/29	51/18986	0.0196078	12.8371	3.31067	0.0750929	0.206619	0.162162	MTOR	1
GO:0010171	body morphogenesis	1/29	52/18986	0.0192308	12.5902	3.27333	0.0765094	0.207996	0.163243	SKI	1
GO:0030838	positive regulation of actin filament polymerization	1/29	52/18986	0.0192308	12.5902	3.27333	0.0765094	0.207996	0.163243	MTOR	1
GO:0032924	activin receptor signaling pathway	1/29	52/18986	0.0192308	12.5902	3.27333	0.0765094	0.207996	0.163243	SKI	1
GO:0042572	retinol metabolic process	1/29	52/18986	0.0192308	12.5902	3.27333	0.0765094	0.207996	0.163243	DHRS3	1
GO:0031648	protein destabilization	1/29	53/18986	0.0188679	12.3526	3.23701	0.0779239	0.209955	0.16478	MTOR	1
GO:0060324	face development	1/29	53/18986	0.0188679	12.3526	3.23701	0.0779239	0.209955	0.16478	SKI	1
GO:1902743	regulation of lamellipodium organization	1/29	53/18986	0.0188679	12.3526	3.23701	0.0779239	0.209955	0.16478	MTOR	1
GO:0008608	attachment of spindle microtubules to kinetochore	1/29	54/18986	0.0185185	12.1239	3.20165	0.0793363	0.212499	0.166777	RCC2	1
GO:0046365	monosaccharide catabolic process	1/29	54/18986	0.0185185	12.1239	3.20165	0.0793363	0.212499	0.166777	ENO1	1
GO:0002639	positive regulation of immunoglobulin production	1/29	55/18986	0.0181818	11.9034	3.16722	0.0807465	0.213133	0.167275	TNFRSF4	1
GO:0006110	regulation of glycolytic process	1/29	55/18986	0.0181818	11.9034	3.16722	0.0807465	0.213133	0.167275	MTOR	1
GO:0030811	regulation of nucleotide catabolic process	1/29	55/18986	0.0181818	11.9034	3.16722	0.0807465	0.213133	0.167275	MTOR	1
GO:0033121	regulation of purine nucleotide catabolic process	1/29	55/18986	0.0181818	11.9034	3.16722	0.0807465	0.213133	0.167275	MTOR	1
GO:0034198	cellular response to amino acid starvation	1/29	55/18986	0.0181818	11.9034	3.16722	0.0807465	0.213133	0.167275	MTOR	1
GO:0010761	fibroblast migration	1/29	56/18986	0.0178571	11.6909	3.13366	0.0821547	0.215597	0.169208	RCC2	1
GO:0046605	regulation of centrosome cycle	1/29	56/18986	0.0178571	11.6909	3.13366	0.0821547	0.215597	0.169208	CCNL2	1
GO:0051146	striated muscle cell differentiation	2/29	314/18986	0.00636943	4.17	2.21538	0.0826585	0.216294	0.169755	SKI/MTOR	2
GO:0071470	cellular response to osmotic stress	1/29	57/18986	0.0175439	11.4858	3.10094	0.0835608	0.217402	0.170625	MTOR	1
GO:1904356	regulation of telomere maintenance via telomere lengthening	1/29	57/18986	0.0175439	11.4858	3.10094	0.0835608	0.217402	0.170625	EXOSC10	1
GO:0031638	zymogen activation	1/29	58/18986	0.0172414	11.2878	3.06903	0.0849648	0.21855	0.171526	ENO1	1
GO:0050805	negative regulation of synaptic transmission	1/29	58/18986	0.0172414	11.2878	3.06903	0.0849648	0.21855	0.171526	TPRG1L	1
GO:0170038	proteinogenic amino acid biosynthetic process	1/29	58/18986	0.0172414	11.2878	3.06903	0.0849648	0.21855	0.171526	MTHFR	1
GO:1990928	response to amino acid starvation	1/29	58/18986	0.0172414	11.2878	3.06903	0.0849648	0.21855	0.171526	MTOR	1
GO:0071375	cellular response to peptide hormone stimulus	2/29	321/18986	0.00623053	4.07906	2.17609	0.0858346	0.219667	0.172403	MTOR/AGTRAP	2
GO:0009948	anterior/posterior axis specification	1/29	59/18986	0.0169492	11.0964	3.03789	0.0863668	0.219667	0.172403	SKI	1
GO:0016073	snRNA metabolic process	1/29	59/18986	0.0169492	11.0964	3.03789	0.0863668	0.219667	0.172403	EXOSC10	1
GO:0170034	L-amino acid biosynthetic process	1/29	59/18986	0.0169492	11.0964	3.03789	0.0863668	0.219667	0.172403	MTHFR	1
GO:0098813	nuclear chromosome segregation	2/29	324/18986	0.00617284	4.04129	2.15959	0.0872073	0.220754	0.173256	WRAP73/RCC2	2
GO:0010718	positive regulation of epithelial to mesenchymal transition	1/29	60/18986	0.0166667	10.9115	3.00749	0.0877666	0.220754	0.173256	MTOR	1
GO:0044088	regulation of vacuole organization	1/29	60/18986	0.0166667	10.9115	3.00749	0.0877666	0.220754	0.173256	MTOR	1
GO:0050881	musculoskeletal movement	1/29	60/18986	0.0166667	10.9115	3.00749	0.0877666	0.220754	0.173256	MTOR	1
GO:0014009	glial cell proliferation	1/29	61/18986	0.0163934	10.7326	2.9778	0.0891644	0.221641	0.173952	SKI	1
GO:0032233	positive regulation of actin filament bundle assembly	1/29	61/18986	0.0163934	10.7326	2.9778	0.0891644	0.221641	0.173952	MTOR	1
GO:0060038	cardiac muscle cell proliferation	1/29	61/18986	0.0163934	10.7326	2.9778	0.0891644	0.221641	0.173952	SKI	1
GO:0046394	carboxylic acid biosynthetic process	2/29	331/18986	0.0060423	3.95583	2.12185	0.0904365	0.221641	0.173952	ACOT7/MTHFR	2
GO:0060562	epithelial tube morphogenesis	2/29	331/18986	0.0060423	3.95583	2.12185	0.0904365	0.221641	0.173952	SKI/MTHFR	2
GO:0003179	heart valve morphogenesis	1/29	62/18986	0.016129	10.5595	2.94879	0.0905602	0.221641	0.173952	MTOR	1
GO:0006383	transcription by RNA polymerase III	1/29	62/18986	0.016129	10.5595	2.94879	0.0905602	0.221641	0.173952	MTOR	1
GO:0007004	telomere maintenance via telomerase	1/29	62/18986	0.016129	10.5595	2.94879	0.0905602	0.221641	0.173952	EXOSC10	1
GO:0050879	multicellular organismal movement	1/29	62/18986	0.016129	10.5595	2.94879	0.0905602	0.221641	0.173952	MTOR	1
GO:1900024	regulation of substrate adhesion-dependent cell spreading	1/29	62/18986	0.016129	10.5595	2.94879	0.0905602	0.221641	0.173952	RCC2	1
GO:0016053	organic acid biosynthetic process	2/29	334/18986	0.00598802	3.9203	2.10599	0.0918315	0.222651	0.174745	ACOT7/MTHFR	2
GO:0045058	T cell selection	1/29	63/18986	0.015873	10.3919	2.92044	0.0919538	0.222651	0.174745	MTOR	1
GO:0051893	regulation of focal adhesion assembly	1/29	63/18986	0.015873	10.3919	2.92044	0.0919538	0.222651	0.174745	RCC2	1
GO:0090109	regulation of cell-substrate junction assembly	1/29	63/18986	0.015873	10.3919	2.92044	0.0919538	0.222651	0.174745	RCC2	1
GO:0051251	positive regulation of lymphocyte activation	2/29	336/18986	0.00595238	3.89696	2.09552	0.0927652	0.224018	0.175818	TNFRSF4/MTOR	2
GO:0002011	morphogenesis of an epithelial sheet	1/29	64/18986	0.015625	10.2295	2.89271	0.0933455	0.224227	0.175981	MTOR	1
GO:0019674	NAD metabolic process	1/29	64/18986	0.015625	10.2295	2.89271	0.0933455	0.224227	0.175981	ENO1	1
GO:0170041	non-proteinogenic amino acid metabolic process	1/29	65/18986	0.0153846	10.0721	2.86559	0.094735	0.224368	0.176092	MTHFR	1
GO:1901607	alpha-amino acid biosynthetic process	1/29	65/18986	0.0153846	10.0721	2.86559	0.094735	0.224368	0.176092	MTHFR	1
GO:1905515	non-motile cilium assembly	1/29	65/18986	0.0153846	10.0721	2.86559	0.094735	0.224368	0.176092	WRAP73	1
GO:0006767	water-soluble vitamin metabolic process	1/29	66/18986	0.0151515	9.91954	2.83905	0.0961225	0.224368	0.176092	PANK4	1
GO:0006893	Golgi to plasma membrane transport	1/29	66/18986	0.0151515	9.91954	2.83905	0.0961225	0.224368	0.176092	VAMP3	1
GO:0010812	negative regulation of cell-substrate adhesion	1/29	66/18986	0.0151515	9.91954	2.83905	0.0961225	0.224368	0.176092	RCC2	1
GO:0017156	calcium-ion regulated exocytosis	1/29	66/18986	0.0151515	9.91954	2.83905	0.0961225	0.224368	0.176092	VAMP3	1
GO:0043470	regulation of carbohydrate catabolic process	1/29	66/18986	0.0151515	9.91954	2.83905	0.0961225	0.224368	0.176092	MTOR	1
GO:0044380	protein localization to cytoskeleton	1/29	66/18986	0.0151515	9.91954	2.83905	0.0961225	0.224368	0.176092	KLHL21	1
GO:0061951	establishment of protein localization to plasma membrane	1/29	66/18986	0.0151515	9.91954	2.83905	0.0961225	0.224368	0.176092	VAMP3	1
GO:0090303	positive regulation of wound healing	1/29	66/18986	0.0151515	9.91954	2.83905	0.0961225	0.224368	0.176092	MTOR	1
GO:0030888	regulation of B cell proliferation	1/29	67/18986	0.0149254	9.77149	2.81307	0.0975079	0.226438	0.177717	TNFRSF4	1
GO:0070613	regulation of protein processing	1/29	67/18986	0.0149254	9.77149	2.81307	0.0975079	0.226438	0.177717	ENO1	1
GO:0009150	purine ribonucleotide metabolic process	2/29	348/18986	0.00574713	3.76258	2.03435	0.0984262	0.226751	0.177962	ENO1/MTOR	2
GO:0062012	regulation of small molecule metabolic process	2/29	348/18986	0.00574713	3.76258	2.03435	0.0984262	0.226751	0.177962	ENO1/MTOR	2
GO:0035019	somatic stem cell population maintenance	1/29	68/18986	0.0147059	9.62779	2.78763	0.0988913	0.226751	0.177962	SKI	1
GO:0045668	negative regulation of osteoblast differentiation	1/29	68/18986	0.0147059	9.62779	2.78763	0.0988913	0.226751	0.177962	SKI	1
GO:0150116	regulation of cell-substrate junction organization	1/29	68/18986	0.0147059	9.62779	2.78763	0.0988913	0.226751	0.177962	RCC2	1
GO:0006278	RNA-templated DNA biosynthetic process	1/29	69/18986	0.0144928	9.48826	2.76272	0.100273	0.228189	0.179091	EXOSC10	1
GO:0010632	regulation of epithelial cell migration	1/29	69/18986	0.0144928	9.48826	2.76272	0.100273	0.228189	0.179091	MTOR	1
GO:0034605	cellular response to heat	1/29	69/18986	0.0144928	9.48826	2.76272	0.100273	0.228189	0.179091	MTOR	1
GO:0042063	gliogenesis	2/29	355/18986	0.0056338	3.68839	1.9999	0.101774	0.231027	0.181318	SKI/MTOR	2
GO:0006936	muscle contraction	2/29	358/18986	0.00558659	3.65748	1.9854	0.103219	0.233722	0.183434	ENO1/MTOR	2
GO:0006887	exocytosis	2/29	360/18986	0.00555556	3.63716	1.97582	0.104185	0.235003	0.184439	TPRG1L/VAMP3	2
GO:0030032	lamellipodium assembly	1/29	72/18986	0.0138889	9.09291	2.69091	0.104404	0.235003	0.184439	MTOR	1
GO:0031589	cell-substrate adhesion	2/29	361/18986	0.00554017	3.62709	1.97106	0.104669	0.235003	0.184439	VAMP3/RCC2	2
GO:0031346	positive regulation of cell projection organization	2/29	363/18986	0.00550964	3.60711	1.96158	0.105639	0.235003	0.184439	WRAP73/MTOR	2
GO:0045670	regulation of osteoclast differentiation	1/29	73/18986	0.0136986	8.96835	2.6679	0.105778	0.235003	0.184439	MTOR	1
GO:0051101	regulation of DNA binding	1/29	73/18986	0.0136986	8.96835	2.6679	0.105778	0.235003	0.184439	SKI	1
GO:1903317	regulation of protein maturation	1/29	73/18986	0.0136986	8.96835	2.6679	0.105778	0.235003	0.184439	ENO1	1
GO:0008652	amino acid biosynthetic process	1/29	74/18986	0.0135135	8.84716	2.64532	0.107149	0.235003	0.184439	MTHFR	1
GO:0014015	positive regulation of gliogenesis	1/29	74/18986	0.0135135	8.84716	2.64532	0.107149	0.235003	0.184439	MTOR	1
GO:0030514	negative regulation of BMP signaling pathway	1/29	74/18986	0.0135135	8.84716	2.64532	0.107149	0.235003	0.184439	SKI	1
GO:0043112	receptor metabolic process	1/29	74/18986	0.0135135	8.84716	2.64532	0.107149	0.235003	0.184439	VAMP3	1
GO:0060411	cardiac septum morphogenesis	1/29	74/18986	0.0135135	8.84716	2.64532	0.107149	0.235003	0.184439	DHRS3	1
GO:0072527	pyrimidine-containing compound metabolic process	1/29	74/18986	0.0135135	8.84716	2.64532	0.107149	0.235003	0.184439	MTOR	1
GO:0009259	ribonucleotide metabolic process	2/29	368/18986	0.00543478	3.5581	1.93818	0.108076	0.235165	0.184566	ENO1/MTOR	2
GO:0003170	heart valve development	1/29	75/18986	0.0133333	8.7292	2.62317	0.108518	0.235165	0.184566	MTOR	1
GO:0006360	transcription by RNA polymerase I	1/29	75/18986	0.0133333	8.7292	2.62317	0.108518	0.235165	0.184566	MTOR	1
GO:0090559	regulation of membrane permeability	1/29	75/18986	0.0133333	8.7292	2.62317	0.108518	0.235165	0.184566	MTOR	1
GO:1902017	regulation of cilium assembly	1/29	75/18986	0.0133333	8.7292	2.62317	0.108518	0.235165	0.184566	WRAP73	1
GO:0002696	positive regulation of leukocyte activation	2/29	371/18986	0.00539084	3.52932	1.92433	0.109546	0.235645	0.184942	TNFRSF4/MTOR	2
GO:0010639	negative regulation of organelle organization	2/29	371/18986	0.00539084	3.52932	1.92433	0.109546	0.235645	0.184942	EXOSC10/MTOR	2
GO:0050795	regulation of behavior	1/29	76/18986	0.0131579	8.61434	2.60143	0.109885	0.235645	0.184942	MTOR	1
GO:0090307	mitotic spindle assembly	1/29	76/18986	0.0131579	8.61434	2.60143	0.109885	0.235645	0.184942	WRAP73	1
GO:0016236	macroautophagy	2/29	372/18986	0.00537634	3.51984	1.91974	0.110037	0.235645	0.184942	MTOR/DNAJC16	2
GO:0002637	regulation of immunoglobulin production	1/29	77/18986	0.012987	8.50246	2.58009	0.11125	0.237124	0.186104	TNFRSF4	1
GO:0051966	regulation of synaptic transmission, glutamatergic	1/29	77/18986	0.012987	8.50246	2.58009	0.11125	0.237124	0.186104	TPRG1L	1
GO:0044282	small molecule catabolic process	2/29	375/18986	0.00533333	3.49168	1.90608	0.111513	0.237129	0.186108	ACOT7/ENO1	2
GO:0019693	ribose phosphate metabolic process	2/29	376/18986	0.00531915	3.48239	1.90156	0.112007	0.237622	0.186495	ENO1/MTOR	2
GO:0019226	transmission of nerve impulse	1/29	78/18986	0.0128205	8.39346	2.55913	0.112613	0.238351	0.187067	MTOR	1
GO:1901568	fatty acid derivative metabolic process	1/29	79/18986	0.0126582	8.28721	2.53853	0.113974	0.240671	0.188887	ACOT7	1
GO:0045685	regulation of glial cell differentiation	1/29	80/18986	0.0125	8.18362	2.5183	0.115333	0.242157	0.190053	MTOR	1
GO:0060390	regulation of SMAD protein signal transduction	1/29	80/18986	0.0125	8.18362	2.5183	0.115333	0.242157	0.190053	SKI	1
GO:0050767	regulation of neurogenesis	2/29	383/18986	0.00522193	3.41874	1.87033	0.115478	0.242157	0.190053	SKI/MTOR	2
GO:0042093	T-helper cell differentiation	1/29	81/18986	0.0123457	8.08259	2.49842	0.11669	0.243574	0.191166	MTOR	1
GO:1903036	positive regulation of response to wounding	1/29	81/18986	0.0123457	8.08259	2.49842	0.11669	0.243574	0.191166	MTOR	1
GO:0003151	outflow tract morphogenesis	1/29	82/18986	0.0121951	7.98402	2.47888	0.118045	0.245837	0.192942	DHRS3	1
GO:0002294	CD4-positive, alpha-beta T cell differentiation involved in immune response	1/29	83/18986	0.0120482	7.88783	2.45966	0.119398	0.247495	0.194243	MTOR	1
GO:0050867	positive regulation of cell activation	2/29	391/18986	0.00511509	3.3488	1.8355	0.119479	0.247495	0.194243	TNFRSF4/MTOR	2
GO:0001523	retinoid metabolic process	1/29	84/18986	0.0119048	7.79392	2.44077	0.120749	0.247495	0.194243	DHRS3	1
GO:0002287	alpha-beta T cell activation involved in immune response	1/29	84/18986	0.0119048	7.79392	2.44077	0.120749	0.247495	0.194243	MTOR	1
GO:0002293	alpha-beta T cell differentiation involved in immune response	1/29	84/18986	0.0119048	7.79392	2.44077	0.120749	0.247495	0.194243	MTOR	1
GO:0034248	regulation of amide metabolic process	1/29	84/18986	0.0119048	7.79392	2.44077	0.120749	0.247495	0.194243	MTOR	1
GO:0051149	positive regulation of muscle cell differentiation	1/29	84/18986	0.0119048	7.79392	2.44077	0.120749	0.247495	0.194243	MTOR	1
GO:0006970	response to osmotic stress	1/29	85/18986	0.0117647	7.70223	2.42218	0.122098	0.248576	0.195092	MTOR	1
GO:0014855	striated muscle cell proliferation	1/29	85/18986	0.0117647	7.70223	2.42218	0.122098	0.248576	0.195092	SKI	1
GO:0048041	focal adhesion assembly	1/29	85/18986	0.0117647	7.70223	2.42218	0.122098	0.248576	0.195092	RCC2	1
GO:0006446	regulation of translational initiation	1/29	86/18986	0.0116279	7.61267	2.40389	0.123445	0.250196	0.196363	MTOR	1
GO:0050871	positive regulation of B cell activation	1/29	86/18986	0.0116279	7.61267	2.40389	0.123445	0.250196	0.196363	TNFRSF4	1
GO:0007422	peripheral nervous system development	1/29	87/18986	0.0114943	7.52517	2.3859	0.12479	0.251798	0.197621	SKI	1
GO:0045913	positive regulation of carbohydrate metabolic process	1/29	87/18986	0.0114943	7.52517	2.3859	0.12479	0.251798	0.197621	MTOR	1
GO:0055013	cardiac muscle cell development	1/29	88/18986	0.0113636	7.43966	2.36818	0.126133	0.253944	0.199304	MTOR	1
GO:0006094	gluconeogenesis	1/29	89/18986	0.011236	7.35606	2.35075	0.127474	0.254387	0.199653	ENO1	1
GO:0009791	post-embryonic development	1/29	89/18986	0.011236	7.35606	2.35075	0.127474	0.254387	0.199653	MTOR	1
GO:0016101	diterpenoid metabolic process	1/29	89/18986	0.011236	7.35606	2.35075	0.127474	0.254387	0.199653	DHRS3	1
GO:1902117	positive regulation of organelle assembly	1/29	89/18986	0.011236	7.35606	2.35075	0.127474	0.254387	0.199653	WRAP73	1
GO:0001558	regulation of cell growth	2/29	408/18986	0.00490196	3.20926	1.7644	0.128099	0.255074	0.200191	ENO1/MTOR	2
GO:0048145	regulation of fibroblast proliferation	1/29	90/18986	0.0111111	7.27433	2.33358	0.128813	0.255935	0.200867	SKI	1
GO:0002088	lens development in camera-type eye	1/29	91/18986	0.010989	7.19439	2.31668	0.13015	0.256749	0.201506	SKI	1
GO:0071230	cellular response to amino acid stimulus	1/29	91/18986	0.010989	7.19439	2.31668	0.13015	0.256749	0.201506	MTOR	1
GO:0097581	lamellipodium organization	1/29	91/18986	0.010989	7.19439	2.31668	0.13015	0.256749	0.201506	MTOR	1
GO:0002292	T cell differentiation involved in immune response	1/29	92/18986	0.0108696	7.11619	2.30002	0.131485	0.256749	0.201506	MTOR	1
GO:0019319	hexose biosynthetic process	1/29	92/18986	0.0108696	7.11619	2.30002	0.131485	0.256749	0.201506	ENO1	1
GO:0032273	positive regulation of protein polymerization	1/29	92/18986	0.0108696	7.11619	2.30002	0.131485	0.256749	0.201506	MTOR	1
GO:0042100	B cell proliferation	1/29	92/18986	0.0108696	7.11619	2.30002	0.131485	0.256749	0.201506	TNFRSF4	1
GO:0055017	cardiac muscle tissue growth	1/29	92/18986	0.0108696	7.11619	2.30002	0.131485	0.256749	0.201506	SKI	1
GO:0033273	response to vitamin	1/29	93/18986	0.0107527	7.03967	2.28362	0.132818	0.258796	0.203112	MTHFR	1
GO:0045786	negative regulation of cell cycle	2/29	419/18986	0.00477327	3.12501	1.72035	0.133756	0.259165	0.203402	FBXO6/ZBTB17	2
GO:0031123	RNA 3'-end processing	1/29	94/18986	0.0106383	6.96478	2.26746	0.134149	0.259165	0.203402	EXOSC10	1
GO:0046889	positive regulation of lipid biosynthetic process	1/29	94/18986	0.0106383	6.96478	2.26746	0.134149	0.259165	0.203402	MTOR	1
GO:2000278	regulation of DNA biosynthetic process	1/29	94/18986	0.0106383	6.96478	2.26746	0.134149	0.259165	0.203402	EXOSC10	1
GO:0032465	regulation of cytokinesis	1/29	95/18986	0.0105263	6.89147	2.25153	0.135478	0.260072	0.204114	KLHL21	1
GO:0051492	regulation of stress fiber assembly	1/29	95/18986	0.0105263	6.89147	2.25153	0.135478	0.260072	0.204114	MTOR	1
GO:0055006	cardiac cell development	1/29	95/18986	0.0105263	6.89147	2.25153	0.135478	0.260072	0.204114	MTOR	1
GO:0014706	striated muscle tissue development	2/29	424/18986	0.00471698	3.08816	1.7008	0.136347	0.260418	0.204385	SKI/MTOR	2
GO:0007044	cell-substrate junction assembly	1/29	96/18986	0.0104167	6.81968	2.23583	0.136805	0.260418	0.204385	RCC2	1
GO:0010507	negative regulation of autophagy	1/29	96/18986	0.0104167	6.81968	2.23583	0.136805	0.260418	0.204385	MTOR	1
GO:0046364	monosaccharide biosynthetic process	1/29	96/18986	0.0104167	6.81968	2.23583	0.136805	0.260418	0.204385	ENO1	1
GO:0010631	epithelial cell migration	1/29	97/18986	0.0103093	6.74938	2.22035	0.138131	0.260754	0.204649	MTOR	1
GO:0033555	multicellular organismal response to stress	1/29	97/18986	0.0103093	6.74938	2.22035	0.138131	0.260754	0.204649	MTOR	1
GO:0051153	regulation of striated muscle cell differentiation	1/29	97/18986	0.0103093	6.74938	2.22035	0.138131	0.260754	0.204649	MTOR	1
GO:0060395	SMAD protein signal transduction	1/29	97/18986	0.0103093	6.74938	2.22035	0.138131	0.260754	0.204649	SKI	1
GO:0007059	chromosome segregation	2/29	429/18986	0.004662	3.05217	1.68154	0.138949	0.261177	0.204982	WRAP73/RCC2	2
GO:0071346	cellular response to type II interferon	1/29	98/18986	0.0102041	6.68051	2.20509	0.139454	0.261177	0.204982	VAMP3	1
GO:0042692	muscle cell differentiation	2/29	432/18986	0.00462963	3.03097	1.67011	0.140516	0.261177	0.204982	SKI/MTOR	2
GO:0006637	acyl-CoA metabolic process	1/29	99/18986	0.010101	6.61303	2.19004	0.140775	0.261177	0.204982	ACOT7	1
GO:0009798	axis specification	1/29	99/18986	0.010101	6.61303	2.19004	0.140775	0.261177	0.204982	SKI	1
GO:0035383	thioester metabolic process	1/29	99/18986	0.010101	6.61303	2.19004	0.140775	0.261177	0.204982	ACOT7	1
GO:0050848	regulation of calcium-mediated signaling	1/29	99/18986	0.010101	6.61303	2.19004	0.140775	0.261177	0.204982	MTOR	1
GO:0098869	cellular oxidant detoxification	1/29	99/18986	0.010101	6.61303	2.19004	0.140775	0.261177	0.204982	UBIAD1	1
GO:0006721	terpenoid metabolic process	1/29	100/18986	0.01	6.5469	2.1752	0.142094	0.261177	0.204982	DHRS3	1
GO:0006754	ATP biosynthetic process	1/29	100/18986	0.01	6.5469	2.1752	0.142094	0.261177	0.204982	ENO1	1
GO:0060419	heart growth	1/29	100/18986	0.01	6.5469	2.1752	0.142094	0.261177	0.204982	SKI	1
GO:0071229	cellular response to acid chemical	1/29	100/18986	0.01	6.5469	2.1752	0.142094	0.261177	0.204982	MTOR	1
GO:0090132	epithelium migration	1/29	100/18986	0.01	6.5469	2.1752	0.142094	0.261177	0.204982	MTOR	1
GO:2001251	negative regulation of chromosome organization	1/29	101/18986	0.00990099	6.48208	2.16056	0.143412	0.263066	0.206464	EXOSC10	1
GO:0006163	purine nucleotide metabolic process	2/29	440/18986	0.00454545	2.97586	1.64013	0.144715	0.263351	0.206688	ENO1/MTOR	2
GO:0006112	energy reserve metabolic process	1/29	102/18986	0.00980392	6.41853	2.14612	0.144727	0.263351	0.206688	MTOR	1
GO:0016079	synaptic vesicle exocytosis	1/29	102/18986	0.00980392	6.41853	2.14612	0.144727	0.263351	0.206688	TPRG1L	1
GO:0043367	CD4-positive, alpha-beta T cell differentiation	1/29	102/18986	0.00980392	6.41853	2.14612	0.144727	0.263351	0.206688	MTOR	1
GO:0034308	primary alcohol metabolic process	1/29	103/18986	0.00970874	6.35621	2.13187	0.146041	0.263628	0.206905	DHRS3	1
GO:0042147	retrograde transport, endosome to Golgi	1/29	103/18986	0.00970874	6.35621	2.13187	0.146041	0.263628	0.206905	VAMP3	1
GO:0051310	metaphase chromosome alignment	1/29	103/18986	0.00970874	6.35621	2.13187	0.146041	0.263628	0.206905	RCC2	1
GO:0150115	cell-substrate junction organization	1/29	103/18986	0.00970874	6.35621	2.13187	0.146041	0.263628	0.206905	RCC2	1
GO:0043434	response to peptide hormone	2/29	446/18986	0.0044843	2.93583	1.61808	0.147882	0.266242	0.208956	MTOR/AGTRAP	2
GO:0060537	muscle tissue development	2/29	447/18986	0.00447427	2.92926	1.61444	0.148411	0.266242	0.208956	SKI/MTOR	2
GO:0090130	tissue migration	1/29	105/18986	0.00952381	6.23514	2.10392	0.148662	0.266242	0.208956	MTOR	1
GO:1901992	positive regulation of mitotic cell cycle phase transition	1/29	105/18986	0.00952381	6.23514	2.10392	0.148662	0.266242	0.208956	RCC2	1
GO:0009062	fatty acid catabolic process	1/29	106/18986	0.00943396	6.17632	2.09022	0.149969	0.267004	0.209554	ACOT7	1
GO:0009408	response to heat	1/29	106/18986	0.00943396	6.17632	2.09022	0.149969	0.267004	0.209554	MTOR	1
GO:0110020	regulation of actomyosin structure organization	1/29	106/18986	0.00943396	6.17632	2.09022	0.149969	0.267004	0.209554	MTOR	1
GO:0002377	immunoglobulin production	1/29	107/18986	0.00934579	6.11859	2.07669	0.151275	0.267233	0.209734	TNFRSF4	1
GO:0010389	regulation of G2/M transition of mitotic cell cycle	1/29	107/18986	0.00934579	6.11859	2.07669	0.151275	0.267233	0.209734	RCC2	1
GO:0032231	regulation of actin filament bundle assembly	1/29	107/18986	0.00934579	6.11859	2.07669	0.151275	0.267233	0.209734	MTOR	1
GO:0051099	positive regulation of binding	1/29	107/18986	0.00934579	6.11859	2.07669	0.151275	0.267233	0.209734	SKI	1
GO:0042274	ribosomal small subunit biogenesis	1/29	108/18986	0.00925926	6.06194	2.06334	0.152579	0.267669	0.210077	EXOSC10	1
GO:0001503	ossification	2/29	456/18986	0.00438596	2.87145	1.58213	0.153193	0.267669	0.210077	SKI/DHRS3	2
GO:0001676	long-chain fatty acid metabolic process	1/29	109/18986	0.00917431	6.00633	2.05015	0.15388	0.267669	0.210077	ACOT7	1
GO:0048144	fibroblast proliferation	1/29	109/18986	0.00917431	6.00633	2.05015	0.15388	0.267669	0.210077	SKI	1
GO:0048709	oligodendrocyte differentiation	1/29	110/18986	0.00909091	5.95172	2.03712	0.15518	0.267669	0.210077	MTOR	1
GO:1901796	regulation of signal transduction by p53 class mediator	1/29	110/18986	0.00909091	5.95172	2.03712	0.15518	0.267669	0.210077	MTOR	1
GO:0003279	cardiac septum development	1/29	111/18986	0.00900901	5.89811	2.02426	0.156478	0.267669	0.210077	DHRS3	1
GO:0006892	post-Golgi vesicle-mediated transport	1/29	111/18986	0.00900901	5.89811	2.02426	0.156478	0.267669	0.210077	VAMP3	1
GO:0007229	integrin-mediated signaling pathway	1/29	111/18986	0.00900901	5.89811	2.02426	0.156478	0.267669	0.210077	RCC2	1
GO:0009206	purine ribonucleoside triphosphate biosynthetic process	1/29	111/18986	0.00900901	5.89811	2.02426	0.156478	0.267669	0.210077	ENO1	1
GO:0035249	synaptic transmission, glutamatergic	1/29	111/18986	0.00900901	5.89811	2.02426	0.156478	0.267669	0.210077	TPRG1L	1
GO:0051960	regulation of nervous system development	2/29	463/18986	0.00431965	2.82803	1.55754	0.156935	0.267669	0.210077	SKI/MTOR	2
GO:0007040	lysosome organization	1/29	112/18986	0.00892857	5.84544	2.01155	0.157774	0.267669	0.210077	MTOR	1
GO:0009145	purine nucleoside triphosphate biosynthetic process	1/29	112/18986	0.00892857	5.84544	2.01155	0.157774	0.267669	0.210077	ENO1	1
GO:0030038	contractile actin filament bundle assembly	1/29	112/18986	0.00892857	5.84544	2.01155	0.157774	0.267669	0.210077	MTOR	1
GO:0030316	osteoclast differentiation	1/29	112/18986	0.00892857	5.84544	2.01155	0.157774	0.267669	0.210077	MTOR	1
GO:0032204	regulation of telomere maintenance	1/29	112/18986	0.00892857	5.84544	2.01155	0.157774	0.267669	0.210077	EXOSC10	1
GO:0043149	stress fiber assembly	1/29	112/18986	0.00892857	5.84544	2.01155	0.157774	0.267669	0.210077	MTOR	1
GO:0080171	lytic vacuole organization	1/29	112/18986	0.00892857	5.84544	2.01155	0.157774	0.267669	0.210077	MTOR	1
GO:1902476	chloride transmembrane transport	1/29	112/18986	0.00892857	5.84544	2.01155	0.157774	0.267669	0.210077	CLCN6	1
GO:2001243	negative regulation of intrinsic apoptotic signaling pathway	1/29	112/18986	0.00892857	5.84544	2.01155	0.157774	0.267669	0.210077	ENO1	1
GO:0003012	muscle system process	2/29	465/18986	0.00430108	2.81587	1.5506	0.158007	0.267669	0.210077	ENO1/MTOR	2
GO:0036503	ERAD pathway	1/29	113/18986	0.00884956	5.79371	1.99899	0.159068	0.267989	0.210327	FBXO6	1
GO:0038202	TORC1 signaling	1/29	113/18986	0.00884956	5.79371	1.99899	0.159068	0.267989	0.210327	MTOR	1
GO:0043161	proteasome-mediated ubiquitin-dependent protein catabolic process	2/29	467/18986	0.00428266	2.80381	1.54369	0.159081	0.267989	0.210327	KLHL21/FBXO6	2
GO:0042752	regulation of circadian rhythm	1/29	114/18986	0.00877193	5.74289	1.98658	0.16036	0.269145	0.211234	MTOR	1
GO:0048024	regulation of mRNA splicing, via spliceosome	1/29	114/18986	0.00877193	5.74289	1.98658	0.16036	0.269145	0.211234	EXOSC10	1
GO:0051303	establishment of chromosome localization	1/29	115/18986	0.00869565	5.69295	1.97432	0.161651	0.27081	0.212541	RCC2	1
GO:0009201	ribonucleoside triphosphate biosynthetic process	1/29	116/18986	0.00862069	5.64388	1.9622	0.162939	0.271964	0.213447	ENO1	1
GO:0070555	response to interleukin-1	1/29	116/18986	0.00862069	5.64388	1.9622	0.162939	0.271964	0.213447	MTHFR	1
GO:0050731	positive regulation of peptidyl-tyrosine phosphorylation	1/29	118/18986	0.00847458	5.54822	1.93838	0.16551	0.275319	0.216081	MTOR	1
GO:1901987	regulation of cell cycle phase transition	2/29	479/18986	0.00417537	2.73357	1.503	0.165555	0.275319	0.216081	FBXO6/RCC2	2
GO:0033209	tumor necrosis factor-mediated signaling pathway	1/29	119/18986	0.00840336	5.50159	1.92667	0.166792	0.276788	0.217233	TNFRSF4	1
GO:0000045	autophagosome assembly	1/29	120/18986	0.00833333	5.45575	1.9151	0.168073	0.276788	0.217233	MTOR	1
GO:0006720	isoprenoid metabolic process	1/29	120/18986	0.00833333	5.45575	1.9151	0.168073	0.276788	0.217233	DHRS3	1
GO:0015908	fatty acid transport	1/29	120/18986	0.00833333	5.45575	1.9151	0.168073	0.276788	0.217233	RBP7	1
GO:1902749	regulation of cell cycle G2/M phase transition	1/29	120/18986	0.00833333	5.45575	1.9151	0.168073	0.276788	0.217233	RCC2	1
GO:0008380	RNA splicing	2/29	484/18986	0.00413223	2.70533	1.48642	0.168268	0.276788	0.217233	CCNL2/EXOSC10	2
GO:0034341	response to type II interferon	1/29	121/18986	0.00826446	5.41066	1.90365	0.169352	0.278068	0.218238	VAMP3	1
GO:0031330	negative regulation of cellular catabolic process	1/29	122/18986	0.00819672	5.36631	1.89233	0.170629	0.279229	0.219149	MTOR	1
GO:0006091	generation of precursor metabolites and energy	2/29	490/18986	0.00408163	2.6722	1.46679	0.171533	0.279229	0.219149	ENO1/MTOR	2
GO:0016049	cell growth	2/29	490/18986	0.00408163	2.6722	1.46679	0.171533	0.279229	0.219149	ENO1/MTOR	2
GO:0030326	embryonic limb morphogenesis	1/29	123/18986	0.00813008	5.32268	1.88113	0.171904	0.279229	0.219149	SKI	1
GO:0035113	embryonic appendage morphogenesis	1/29	123/18986	0.00813008	5.32268	1.88113	0.171904	0.279229	0.219149	SKI	1
GO:0050000	chromosome localization	1/29	123/18986	0.00813008	5.32268	1.88113	0.171904	0.279229	0.219149	RCC2	1
GO:0000956	nuclear-transcribed mRNA catabolic process	1/29	124/18986	0.00806452	5.27976	1.87006	0.173177	0.279795	0.219593	EXOSC10	1
GO:0009142	nucleoside triphosphate biosynthetic process	1/29	124/18986	0.00806452	5.27976	1.87006	0.173177	0.279795	0.219593	ENO1	1
GO:0030510	regulation of BMP signaling pathway	1/29	124/18986	0.00806452	5.27976	1.87006	0.173177	0.279795	0.219593	SKI	1
GO:0001952	regulation of cell-matrix adhesion	1/29	125/18986	0.008	5.23752	1.8591	0.174448	0.279857	0.219642	RCC2	1
GO:0030278	regulation of ossification	1/29	125/18986	0.008	5.23752	1.8591	0.174448	0.279857	0.219642	DHRS3	1
GO:1901989	positive regulation of cell cycle phase transition	1/29	125/18986	0.008	5.23752	1.8591	0.174448	0.279857	0.219642	RCC2	1
GO:1990748	cellular detoxification	1/29	125/18986	0.008	5.23752	1.8591	0.174448	0.279857	0.219642	UBIAD1	1
GO:0010717	regulation of epithelial to mesenchymal transition	1/29	126/18986	0.00793651	5.19595	1.84826	0.175718	0.280901	0.220461	MTOR	1
GO:0034502	protein localization to chromosome	1/29	126/18986	0.00793651	5.19595	1.84826	0.175718	0.280901	0.220461	RCC2	1
GO:0006413	translational initiation	1/29	127/18986	0.00787402	5.15504	1.83754	0.176985	0.281959	0.221292	MTOR	1
GO:0009117	nucleotide metabolic process	2/29	500/18986	0.004	2.61876	1.43471	0.177001	0.281959	0.221292	ENO1/MTOR	2
GO:0006821	chloride transport	1/29	128/18986	0.0078125	5.11476	1.82693	0.178251	0.282957	0.222075	CLCN6	1
GO:0006906	vesicle fusion	1/29	128/18986	0.0078125	5.11476	1.82693	0.178251	0.282957	0.222075	VAMP3	1
GO:0003206	cardiac chamber morphogenesis	1/29	129/18986	0.00775194	5.07511	1.81643	0.179514	0.28397	0.22287	DHRS3	1
GO:0035710	CD4-positive, alpha-beta T cell activation	1/29	129/18986	0.00775194	5.07511	1.81643	0.179514	0.28397	0.22287	MTOR	1
GO:0002761	regulation of myeloid leukocyte differentiation	1/29	130/18986	0.00769231	5.03607	1.80603	0.180776	0.284973	0.223658	MTOR	1
GO:0090174	organelle membrane fusion	1/29	130/18986	0.00769231	5.03607	1.80603	0.180776	0.284973	0.223658	VAMP3	1
GO:0000077	DNA damage checkpoint signaling	1/29	131/18986	0.00763359	4.99763	1.79574	0.182036	0.285473	0.224049	FBXO6	1
GO:0055007	cardiac muscle cell differentiation	1/29	131/18986	0.00763359	4.99763	1.79574	0.182036	0.285473	0.224049	MTOR	1
GO:0072329	monocarboxylic acid catabolic process	1/29	131/18986	0.00763359	4.99763	1.79574	0.182036	0.285473	0.224049	ACOT7	1
GO:0030512	negative regulation of transforming growth factor beta receptor signaling pathway	1/29	132/18986	0.00757576	4.95977	1.78556	0.183294	0.286456	0.224821	SKI	1
GO:0045834	positive regulation of lipid metabolic process	1/29	132/18986	0.00757576	4.95977	1.78556	0.183294	0.286456	0.224821	MTOR	1
GO:0046632	alpha-beta T cell differentiation	1/29	133/18986	0.0075188	4.92248	1.77548	0.18455	0.286938	0.225199	MTOR	1
GO:0050864	regulation of B cell activation	1/29	133/18986	0.0075188	4.92248	1.77548	0.18455	0.286938	0.225199	TNFRSF4	1
GO:0098661	inorganic anion transmembrane transport	1/29	133/18986	0.0075188	4.92248	1.77548	0.18455	0.286938	0.225199	CLCN6	1
GO:0007052	mitotic spindle organization	1/29	134/18986	0.00746269	4.88574	1.7655	0.185805	0.287851	0.225916	WRAP73	1
GO:0051225	spindle assembly	1/29	134/18986	0.00746269	4.88574	1.7655	0.185805	0.287851	0.225916	WRAP73	1
GO:0030833	regulation of actin filament polymerization	1/29	135/18986	0.00740741	4.84955	1.75562	0.187057	0.287851	0.225916	MTOR	1
GO:0051983	regulation of chromosome segregation	1/29	135/18986	0.00740741	4.84955	1.75562	0.187057	0.287851	0.225916	RCC2	1
GO:0097237	cellular response to toxic substance	1/29	135/18986	0.00740741	4.84955	1.75562	0.187057	0.287851	0.225916	UBIAD1	1
GO:0002286	T cell activation involved in immune response	1/29	136/18986	0.00735294	4.81389	1.74583	0.188308	0.287851	0.225916	MTOR	1
GO:0021782	glial cell development	1/29	136/18986	0.00735294	4.81389	1.74583	0.188308	0.287851	0.225916	SKI	1
GO:0045931	positive regulation of mitotic cell cycle	1/29	136/18986	0.00735294	4.81389	1.74583	0.188308	0.287851	0.225916	RCC2	1
GO:0048593	camera-type eye morphogenesis	1/29	136/18986	0.00735294	4.81389	1.74583	0.188308	0.287851	0.225916	SKI	1
GO:0050684	regulation of mRNA processing	1/29	136/18986	0.00735294	4.81389	1.74583	0.188308	0.287851	0.225916	EXOSC10	1
GO:0050768	negative regulation of neurogenesis	1/29	138/18986	0.00724638	4.74413	1.72654	0.190803	0.290687	0.228142	SKI	1
GO:0051053	negative regulation of DNA metabolic process	1/29	138/18986	0.00724638	4.74413	1.72654	0.190803	0.290687	0.228142	EXOSC10	1
GO:0007266	Rho protein signal transduction	1/29	139/18986	0.00719424	4.71	1.71704	0.192048	0.291059	0.228434	PLEKHG5	1
GO:0045727	positive regulation of translation	1/29	139/18986	0.00719424	4.71	1.71704	0.192048	0.291059	0.228434	MTOR	1
GO:0090288	negative regulation of cellular response to growth factor stimulus	1/29	139/18986	0.00719424	4.71	1.71704	0.192048	0.291059	0.228434	SKI	1
GO:0002702	positive regulation of production of molecular mediator of immune response	1/29	140/18986	0.00714286	4.67635	1.70762	0.193292	0.291059	0.228434	TNFRSF4	1
GO:0031570	DNA integrity checkpoint signaling	1/29	140/18986	0.00714286	4.67635	1.70762	0.193292	0.291059	0.228434	FBXO6	1
GO:0043547	positive regulation of GTPase activity	1/29	140/18986	0.00714286	4.67635	1.70762	0.193292	0.291059	0.228434	RCC2	1
GO:0061041	regulation of wound healing	1/29	140/18986	0.00714286	4.67635	1.70762	0.193292	0.291059	0.228434	MTOR	1
GO:0000086	G2/M transition of mitotic cell cycle	1/29	141/18986	0.0070922	4.64319	1.69829	0.194533	0.292444	0.22952	RCC2	1
GO:0016482	cytosolic transport	1/29	142/18986	0.00704225	4.61049	1.68905	0.195773	0.293821	0.230601	VAMP3	1
GO:0006986	response to unfolded protein	1/29	143/18986	0.00699301	4.57825	1.6799	0.19701	0.294704	0.231294	FBXO6	1
GO:0007098	centrosome cycle	1/29	143/18986	0.00699301	4.57825	1.6799	0.19701	0.294704	0.231294	CCNL2	1
GO:0050671	positive regulation of lymphocyte proliferation	1/29	145/18986	0.00689655	4.5151	1.66184	0.19948	0.297303	0.233334	TNFRSF4	1
GO:0007269	neurotransmitter secretion	1/29	146/18986	0.00684932	4.48418	1.65293	0.200712	0.297303	0.233334	TPRG1L	1
GO:0043467	regulation of generation of precursor metabolites and energy	1/29	146/18986	0.00684932	4.48418	1.65293	0.200712	0.297303	0.233334	MTOR	1
GO:0051961	negative regulation of nervous system development	1/29	146/18986	0.00684932	4.48418	1.65293	0.200712	0.297303	0.233334	SKI	1
GO:0099643	signal release from synapse	1/29	146/18986	0.00684932	4.48418	1.65293	0.200712	0.297303	0.233334	TPRG1L	1
GO:1900180	regulation of protein localization to nucleus	1/29	146/18986	0.00684932	4.48418	1.65293	0.200712	0.297303	0.233334	MTOR	1
GO:0060048	cardiac muscle contraction	1/29	147/18986	0.00680272	4.45367	1.64411	0.201943	0.298638	0.234382	MTOR	1
GO:0032946	positive regulation of mononuclear cell proliferation	1/29	148/18986	0.00675676	4.42358	1.63536	0.203171	0.299966	0.235425	TNFRSF4	1
GO:0035107	appendage morphogenesis	1/29	151/18986	0.00662252	4.33569	1.60958	0.206846	0.303909	0.238519	SKI	1
GO:0035108	limb morphogenesis	1/29	151/18986	0.00662252	4.33569	1.60958	0.206846	0.303909	0.238519	SKI	1
GO:0098656	monoatomic anion transmembrane transport	1/29	151/18986	0.00662252	4.33569	1.60958	0.206846	0.303909	0.238519	CLCN6	1
GO:0030177	positive regulation of Wnt signaling pathway	1/29	152/18986	0.00657895	4.30717	1.60113	0.208067	0.305209	0.239539	SKI	1
GO:0008064	regulation of actin polymerization or depolymerization	1/29	153/18986	0.00653595	4.27902	1.59276	0.209286	0.306503	0.240555	MTOR	1
GO:1903531	negative regulation of secretion by cell	1/29	154/18986	0.00649351	4.25123	1.58445	0.210504	0.30779	0.241565	VAMP3	1
GO:0009152	purine ribonucleotide biosynthetic process	1/29	156/18986	0.00641026	4.19673	1.56806	0.212933	0.30935	0.242789	ENO1	1
GO:0030832	regulation of actin filament length	1/29	156/18986	0.00641026	4.19673	1.56806	0.212933	0.30935	0.242789	MTOR	1
GO:0031023	microtubule organizing center organization	1/29	156/18986	0.00641026	4.19673	1.56806	0.212933	0.30935	0.242789	CCNL2	1
GO:0045667	regulation of osteoblast differentiation	1/29	156/18986	0.00641026	4.19673	1.56806	0.212933	0.30935	0.242789	SKI	1
GO:0098876	vesicle-mediated transport to the plasma membrane	1/29	157/18986	0.00636943	4.17	1.55996	0.214146	0.310614	0.243781	VAMP3	1
GO:0035264	multicellular organism growth	1/29	158/18986	0.00632911	4.14361	1.55194	0.215356	0.31088	0.24399	MTOR	1
GO:0043433	negative regulation of DNA-binding transcription factor activity	1/29	158/18986	0.00632911	4.14361	1.55194	0.215356	0.31088	0.24399	TNFRSF4	1
GO:0044839	cell cycle G2/M phase transition	1/29	158/18986	0.00632911	4.14361	1.55194	0.215356	0.31088	0.24399	RCC2	1
GO:0018105	peptidyl-serine phosphorylation	1/29	159/18986	0.00628931	4.11755	1.54397	0.216565	0.311633	0.244581	MTOR	1
GO:0046718	symbiont entry into host cell	1/29	159/18986	0.00628931	4.11755	1.54397	0.216565	0.311633	0.244581	TNFRSF4	1
GO:0035966	response to topologically incorrect protein	1/29	160/18986	0.00625	4.09181	1.53608	0.217771	0.312874	0.245555	FBXO6	1
GO:0050730	regulation of peptidyl-tyrosine phosphorylation	1/29	162/18986	0.00617284	4.04129	1.52048	0.220179	0.315834	0.247878	MTOR	1
GO:0120254	olefinic compound metabolic process	1/29	163/18986	0.00613497	4.0165	1.51277	0.221381	0.317056	0.248837	DHRS3	1
GO:0044409	symbiont entry into host	1/29	164/18986	0.00609756	3.99201	1.50512	0.22258	0.317772	0.249399	TNFRSF4	1
GO:0051017	actin filament bundle assembly	1/29	164/18986	0.00609756	3.99201	1.50512	0.22258	0.317772	0.249399	MTOR	1
GO:0002181	cytoplasmic translation	1/29	165/18986	0.00606061	3.96782	1.49754	0.223778	0.317896	0.249497	MTOR	1
GO:0006633	fatty acid biosynthetic process	1/29	165/18986	0.00606061	3.96782	1.49754	0.223778	0.317896	0.249497	ACOT7	1
GO:0030307	positive regulation of cell growth	1/29	166/18986	0.0060241	3.94391	1.49001	0.224974	0.317896	0.249497	MTOR	1
GO:0051147	regulation of muscle cell differentiation	1/29	166/18986	0.0060241	3.94391	1.49001	0.224974	0.317896	0.249497	MTOR	1
GO:0070665	positive regulation of leukocyte proliferation	1/29	166/18986	0.0060241	3.94391	1.49001	0.224974	0.317896	0.249497	TNFRSF4	1
GO:0030041	actin filament polymerization	1/29	167/18986	0.00598802	3.9203	1.48254	0.226168	0.317896	0.249497	MTOR	1
GO:0035051	cardiocyte differentiation	1/29	167/18986	0.00598802	3.9203	1.48254	0.226168	0.317896	0.249497	MTOR	1
GO:0048592	eye morphogenesis	1/29	167/18986	0.00598802	3.9203	1.48254	0.226168	0.317896	0.249497	SKI	1
GO:0098754	detoxification	1/29	167/18986	0.00598802	3.9203	1.48254	0.226168	0.317896	0.249497	UBIAD1	1
GO:1902850	microtubule cytoskeleton organization involved in mitosis	1/29	167/18986	0.00598802	3.9203	1.48254	0.226168	0.317896	0.249497	WRAP73	1
GO:0061572	actin filament bundle organization	1/29	168/18986	0.00595238	3.89696	1.47513	0.227361	0.319078	0.250424	MTOR	1
GO:0009260	ribonucleotide biosynthetic process	1/29	171/18986	0.00584795	3.82859	1.45324	0.230928	0.323085	0.253569	ENO1	1
GO:0018209	peptidyl-serine modification	1/29	171/18986	0.00584795	3.82859	1.45324	0.230928	0.323085	0.253569	MTOR	1
GO:0003205	cardiac chamber development	1/29	172/18986	0.00581395	3.80634	1.44605	0.232113	0.32325	0.253698	DHRS3	1
GO:0030509	BMP signaling pathway	1/29	172/18986	0.00581395	3.80634	1.44605	0.232113	0.32325	0.253698	SKI	1
GO:0048284	organelle fusion	1/29	172/18986	0.00581395	3.80634	1.44605	0.232113	0.32325	0.253698	VAMP3	1
GO:0030308	negative regulation of cell growth	1/29	173/18986	0.00578035	3.78433	1.43891	0.233297	0.324059	0.254333	ENO1	1
GO:0006937	regulation of muscle contraction	1/29	174/18986	0.00574713	3.76258	1.43183	0.234479	0.324059	0.254333	ENO1	1
GO:0015698	inorganic anion transport	1/29	174/18986	0.00574713	3.76258	1.43183	0.234479	0.324059	0.254333	CLCN6	1
GO:0060041	retina development in camera-type eye	1/29	174/18986	0.00574713	3.76258	1.43183	0.234479	0.324059	0.254333	SKI	1
GO:0170039	proteinogenic amino acid metabolic process	1/29	174/18986	0.00574713	3.76258	1.43183	0.234479	0.324059	0.254333	MTHFR	1
GO:0051048	negative regulation of secretion	1/29	175/18986	0.00571429	3.74108	1.4248	0.235659	0.325195	0.255225	VAMP3	1
GO:0009266	response to temperature stimulus	1/29	176/18986	0.00568182	3.71983	1.41783	0.236837	0.32583	0.255724	MTOR	1
GO:0050905	neuromuscular process	1/29	176/18986	0.00568182	3.71983	1.41783	0.236837	0.32583	0.255724	MTOR	1
GO:0001508	action potential	1/29	177/18986	0.00564972	3.69881	1.4109	0.238014	0.325967	0.255831	MTOR	1
GO:0006820	monoatomic anion transport	1/29	177/18986	0.00564972	3.69881	1.4109	0.238014	0.325967	0.255831	CLCN6	1
GO:1902905	positive regulation of supramolecular fiber organization	1/29	177/18986	0.00564972	3.69881	1.4109	0.238014	0.325967	0.255831	MTOR	1
GO:0007519	skeletal muscle tissue development	1/29	178/18986	0.00561798	3.67803	1.40402	0.239189	0.326101	0.255936	SKI	1
GO:0031929	TOR signaling	1/29	178/18986	0.00561798	3.67803	1.40402	0.239189	0.326101	0.255936	MTOR	1
GO:0046390	ribose phosphate biosynthetic process	1/29	178/18986	0.00561798	3.67803	1.40402	0.239189	0.326101	0.255936	ENO1	1
GO:0015718	monocarboxylic acid transport	1/29	179/18986	0.00558659	3.65748	1.39719	0.240362	0.327209	0.256805	RBP7	1
GO:0017015	regulation of transforming growth factor beta receptor signaling pathway	1/29	180/18986	0.00555556	3.63716	1.39042	0.241533	0.327331	0.256901	SKI	1
GO:0046777	protein autophosphorylation	1/29	180/18986	0.00555556	3.63716	1.39042	0.241533	0.327331	0.256901	MTOR	1
GO:0141193	nuclear receptor-mediated signaling pathway	1/29	180/18986	0.00555556	3.63716	1.39042	0.241533	0.327331	0.256901	DHRS3	1
GO:0035265	organ growth	1/29	181/18986	0.00552486	3.61707	1.38369	0.242703	0.32745	0.256995	SKI	1
GO:0170033	L-amino acid metabolic process	1/29	181/18986	0.00552486	3.61707	1.38369	0.242703	0.32745	0.256995	MTHFR	1
GO:1903034	regulation of response to wounding	1/29	181/18986	0.00552486	3.61707	1.38369	0.242703	0.32745	0.256995	MTOR	1
GO:0072331	signal transduction by p53 class mediator	1/29	183/18986	0.00546448	3.57754	1.37037	0.245037	0.32962	0.258697	MTOR	1
GO:1903844	regulation of cellular response to transforming growth factor beta stimulus	1/29	183/18986	0.00546448	3.57754	1.37037	0.245037	0.32962	0.258697	SKI	1
GO:0071772	response to BMP	1/29	184/18986	0.00543478	3.5581	1.36378	0.246201	0.330207	0.259159	SKI	1
GO:0071773	cellular response to BMP stimulus	1/29	184/18986	0.00543478	3.5581	1.36378	0.246201	0.330207	0.259159	SKI	1
GO:0019827	stem cell population maintenance	1/29	186/18986	0.00537634	3.51984	1.35073	0.248524	0.332342	0.260834	SKI	1
GO:0051495	positive regulation of cytoskeleton organization	1/29	186/18986	0.00537634	3.51984	1.35073	0.248524	0.332342	0.260834	MTOR	1
GO:0048736	appendage development	1/29	189/18986	0.00529101	3.46397	1.3315	0.251997	0.335074	0.262979	SKI	1
GO:0060173	limb development	1/29	189/18986	0.00529101	3.46397	1.3315	0.251997	0.335074	0.262979	SKI	1
GO:2001242	regulation of intrinsic apoptotic signaling pathway	1/29	189/18986	0.00529101	3.46397	1.3315	0.251997	0.335074	0.262979	ENO1	1
GO:0008217	regulation of blood pressure	1/29	190/18986	0.00526316	3.44574	1.32517	0.253151	0.335074	0.262979	AGTRAP	1
GO:0009267	cellular response to starvation	1/29	190/18986	0.00526316	3.44574	1.32517	0.253151	0.335074	0.262979	MTOR	1
GO:0051302	regulation of cell division	1/29	190/18986	0.00526316	3.44574	1.32517	0.253151	0.335074	0.262979	KLHL21	1
GO:0098727	maintenance of cell number	1/29	190/18986	0.00526316	3.44574	1.32517	0.253151	0.335074	0.262979	SKI	1
GO:0016241	regulation of macroautophagy	1/29	191/18986	0.0052356	3.42769	1.31889	0.254303	0.335191	0.26307	MTOR	1
GO:0000910	cytokinesis	1/29	192/18986	0.00520833	3.40984	1.31265	0.255454	0.335191	0.26307	KLHL21	1
GO:0001837	epithelial to mesenchymal transition	1/29	192/18986	0.00520833	3.40984	1.31265	0.255454	0.335191	0.26307	MTOR	1
GO:0051897	positive regulation of phosphatidylinositol 3-kinase/protein kinase B signal transduction	1/29	192/18986	0.00520833	3.40984	1.31265	0.255454	0.335191	0.26307	MTOR	1
GO:0060538	skeletal muscle organ development	1/29	192/18986	0.00520833	3.40984	1.31265	0.255454	0.335191	0.26307	SKI	1
GO:0061025	membrane fusion	1/29	192/18986	0.00520833	3.40984	1.31265	0.255454	0.335191	0.26307	VAMP3	1
GO:0006109	regulation of carbohydrate metabolic process	1/29	193/18986	0.00518135	3.39217	1.30645	0.256603	0.335296	0.263153	MTOR	1
GO:0043087	regulation of GTPase activity	1/29	193/18986	0.00518135	3.39217	1.30645	0.256603	0.335296	0.263153	RCC2	1
GO:0000070	mitotic sister chromatid segregation	1/29	194/18986	0.00515464	3.37469	1.30029	0.25775	0.335296	0.263153	WRAP73	1
GO:0006941	striated muscle contraction	1/29	194/18986	0.00515464	3.37469	1.30029	0.25775	0.335296	0.263153	MTOR	1
GO:0042770	signal transduction in response to DNA damage	1/29	194/18986	0.00515464	3.37469	1.30029	0.25775	0.335296	0.263153	FBXO6	1
GO:0045664	regulation of neuron differentiation	1/29	194/18986	0.00515464	3.37469	1.30029	0.25775	0.335296	0.263153	CASZ1	1
GO:0002700	regulation of production of molecular mediator of immune response	1/29	196/18986	0.00510204	3.34025	1.28809	0.260039	0.336347	0.263977	TNFRSF4	1
GO:0008154	actin polymerization or depolymerization	1/29	196/18986	0.00510204	3.34025	1.28809	0.260039	0.336347	0.263977	MTOR	1
GO:0046631	alpha-beta T cell activation	1/29	196/18986	0.00510204	3.34025	1.28809	0.260039	0.336347	0.263977	MTOR	1
GO:0046890	regulation of lipid biosynthetic process	1/29	196/18986	0.00510204	3.34025	1.28809	0.260039	0.336347	0.263977	MTOR	1
GO:0006006	glucose metabolic process	1/29	197/18986	0.00507614	3.3233	1.28205	0.261181	0.336864	0.264383	ENO1	1
GO:0006164	purine nucleotide biosynthetic process	1/29	197/18986	0.00507614	3.3233	1.28205	0.261181	0.336864	0.264383	ENO1	1
GO:0031334	positive regulation of protein-containing complex assembly	1/29	200/18986	0.005	3.27345	1.26416	0.264597	0.340786	0.267461	MTOR	1
GO:0007369	gastrulation	1/29	202/18986	0.0049505	3.24104	1.25242	0.266866	0.343221	0.269372	ZBTB17	1
GO:0000075	cell cycle checkpoint signaling	1/29	203/18986	0.00492611	3.22507	1.24661	0.267998	0.343696	0.269745	FBXO6	1
GO:0006403	RNA localization	1/29	204/18986	0.00490196	3.20926	1.24083	0.269128	0.343696	0.269745	EXOSC10	1
GO:0007051	spindle organization	1/29	204/18986	0.00490196	3.20926	1.24083	0.269128	0.343696	0.269745	WRAP73	1
GO:0018108	peptidyl-tyrosine phosphorylation	1/29	204/18986	0.00490196	3.20926	1.24083	0.269128	0.343696	0.269745	MTOR	1
GO:0051701	biological process involved in interaction with host	1/29	204/18986	0.00490196	3.20926	1.24083	0.269128	0.343696	0.269745	TNFRSF4	1
GO:0090101	negative regulation of transmembrane receptor protein serine/threonine kinase signaling pathway	1/29	205/18986	0.00487805	3.19361	1.23508	0.270256	0.344653	0.270496	SKI	1
GO:0007623	circadian rhythm	1/29	206/18986	0.00485437	3.17811	1.22937	0.271383	0.34512	0.270863	MTOR	1
GO:0018212	peptidyl-tyrosine modification	1/29	206/18986	0.00485437	3.17811	1.22937	0.271383	0.34512	0.270863	MTOR	1
GO:0016051	carbohydrate biosynthetic process	1/29	207/18986	0.00483092	3.16275	1.2237	0.272508	0.345583	0.271226	ENO1	1
GO:0032271	regulation of protein polymerization	1/29	207/18986	0.00483092	3.16275	1.2237	0.272508	0.345583	0.271226	MTOR	1
GO:0006836	neurotransmitter transport	1/29	209/18986	0.00478469	3.13249	1.21246	0.274753	0.34746	0.272699	TPRG1L	1
GO:1901605	alpha-amino acid metabolic process	1/29	209/18986	0.00478469	3.13249	1.21246	0.274753	0.34746	0.272699	MTHFR	1
GO:0007626	locomotory behavior	1/29	213/18986	0.00469484	3.07366	1.19036	0.279224	0.352132	0.276366	MTOR	1
GO:0032869	cellular response to insulin stimulus	1/29	213/18986	0.00469484	3.07366	1.19036	0.279224	0.352132	0.276366	MTOR	1
GO:0042098	T cell proliferation	1/29	215/18986	0.00465116	3.04507	1.17951	0.281449	0.354446	0.278182	TNFRSF4	1
GO:0031032	actomyosin structure organization	1/29	216/18986	0.00462963	3.03097	1.17413	0.282559	0.355351	0.278893	MTOR	1
GO:0045637	regulation of myeloid cell differentiation	1/29	219/18986	0.00456621	2.98945	1.15818	0.28588	0.358534	0.281391	MTOR	1
GO:0051098	regulation of binding	1/29	219/18986	0.00456621	2.98945	1.15818	0.28588	0.358534	0.281391	SKI	1
GO:0009952	anterior/posterior pattern specification	1/29	220/18986	0.00454545	2.97586	1.15293	0.286983	0.359422	0.282087	SKI	1
GO:0071356	cellular response to tumor necrosis factor	1/29	221/18986	0.00452489	2.9624	1.1477	0.288085	0.359587	0.282217	TNFRSF4	1
GO:0007601	visual perception	1/29	222/18986	0.0045045	2.94905	1.1425	0.289185	0.359587	0.282217	DHRS3	1
GO:0009612	response to mechanical stimulus	1/29	222/18986	0.0045045	2.94905	1.1425	0.289185	0.359587	0.282217	CLCN6	1
GO:0099504	synaptic vesicle cycle	1/29	222/18986	0.0045045	2.94905	1.1425	0.289185	0.359587	0.282217	TPRG1L	1
GO:0009755	hormone-mediated signaling pathway	1/29	223/18986	0.0044843	2.93583	1.13733	0.290284	0.359587	0.282217	DHRS3	1
GO:0010810	regulation of cell-substrate adhesion	1/29	223/18986	0.0044843	2.93583	1.13733	0.290284	0.359587	0.282217	RCC2	1
GO:0043123	positive regulation of canonical NF-kappaB signal transduction	1/29	223/18986	0.0044843	2.93583	1.13733	0.290284	0.359587	0.282217	PLEKHG5	1
GO:1903828	negative regulation of protein localization	1/29	223/18986	0.0044843	2.93583	1.13733	0.290284	0.359587	0.282217	MTOR	1
GO:0072330	monocarboxylic acid biosynthetic process	1/29	224/18986	0.00446429	2.92272	1.13219	0.291381	0.360455	0.282898	ACOT7	1
GO:0006364	rRNA processing	1/29	225/18986	0.00444444	2.90973	1.12708	0.292476	0.360826	0.28319	EXOSC10	1
GO:0060541	respiratory system development	1/29	225/18986	0.00444444	2.90973	1.12708	0.292476	0.360826	0.28319	SKI	1
GO:0050953	sensory perception of light stimulus	1/29	226/18986	0.00442478	2.89686	1.122	0.29357	0.361684	0.283863	DHRS3	1
GO:0002285	lymphocyte activation involved in immune response	1/29	227/18986	0.00440529	2.8841	1.11694	0.294662	0.362538	0.284533	MTOR	1
GO:0002440	production of molecular mediator of immune response	1/29	230/18986	0.00434783	2.84648	1.10194	0.297928	0.365566	0.286909	TNFRSF4	1
GO:0042594	response to starvation	1/29	230/18986	0.00434783	2.84648	1.10194	0.297928	0.365566	0.286909	MTOR	1
GO:0045926	negative regulation of growth	1/29	232/18986	0.00431034	2.82194	1.09207	0.300097	0.367731	0.288608	ENO1	1
GO:0009165	nucleotide biosynthetic process	1/29	233/18986	0.00429185	2.80983	1.08717	0.30118	0.368559	0.289259	ENO1	1
GO:0000819	sister chromatid segregation	1/29	235/18986	0.00425532	2.78591	1.07746	0.303339	0.370205	0.29055	WRAP73	1
GO:0031331	positive regulation of cellular catabolic process	1/29	235/18986	0.00425532	2.78591	1.07746	0.303339	0.370205	0.29055	MTOR	1
GO:1903313	positive regulation of mRNA metabolic process	1/29	236/18986	0.00423729	2.77411	1.07264	0.304417	0.371021	0.291191	EXOSC10	1
GO:0042180	cellular ketone metabolic process	1/29	237/18986	0.00421941	2.7624	1.06785	0.305493	0.371833	0.291828	UBIAD1	1
GO:0019318	hexose metabolic process	1/29	238/18986	0.00420168	2.7508	1.06308	0.306567	0.372143	0.292071	ENO1	1
GO:0044242	cellular lipid catabolic process	1/29	238/18986	0.00420168	2.7508	1.06308	0.306567	0.372143	0.292071	ACOT7	1
GO:0050670	regulation of lymphocyte proliferation	1/29	240/18986	0.00416667	2.72787	1.05362	0.308711	0.374245	0.293721	TNFRSF4	1
GO:0007160	cell-matrix adhesion	1/29	241/18986	0.00414938	2.71655	1.04892	0.30978	0.374541	0.293953	RCC2	1
GO:0042445	hormone metabolic process	1/29	241/18986	0.00414938	2.71655	1.04892	0.30978	0.374541	0.293953	DHRS3	1
GO:0034612	response to tumor necrosis factor	1/29	243/18986	0.00411523	2.6942	1.0396	0.311914	0.37662	0.295585	TNFRSF4	1
GO:2001234	negative regulation of apoptotic signaling pathway	1/29	244/18986	0.00409836	2.68315	1.03498	0.312979	0.377403	0.2962	ENO1	1
GO:0032944	regulation of mononuclear cell proliferation	1/29	245/18986	0.00408163	2.6722	1.03037	0.314042	0.378183	0.296812	TNFRSF4	1
GO:0016485	protein processing	1/29	246/18986	0.00406504	2.66134	1.0258	0.315103	0.378959	0.29742	ENO1	1
GO:0002573	myeloid leukocyte differentiation	1/29	247/18986	0.00404858	2.65057	1.02124	0.316163	0.379229	0.297632	MTOR	1
GO:0050769	positive regulation of neurogenesis	1/29	247/18986	0.00404858	2.65057	1.02124	0.316163	0.379229	0.297632	MTOR	1
GO:0016054	organic acid catabolic process	1/29	249/18986	0.00401606	2.62928	1.01219	0.318278	0.380759	0.298834	ACOT7	1
GO:0046395	carboxylic acid catabolic process	1/29	249/18986	0.00401606	2.62928	1.01219	0.318278	0.380759	0.298834	ACOT7	1
GO:0007179	transforming growth factor beta receptor signaling pathway	1/29	250/18986	0.004	2.61876	1.0077	0.319333	0.381519	0.29943	SKI	1
GO:0033002	muscle cell proliferation	1/29	252/18986	0.00396825	2.59797	0.998791	0.321439	0.383027	0.300613	SKI	1
GO:0051346	negative regulation of hydrolase activity	1/29	252/18986	0.00396825	2.59797	0.998791	0.321439	0.383027	0.300613	RCC2	1
GO:0060047	heart contraction	1/29	253/18986	0.00395257	2.58771	0.994366	0.322489	0.383775	0.3012	MTOR	1
GO:0090257	regulation of muscle system process	1/29	254/18986	0.00393701	2.57752	0.989962	0.323538	0.384519	0.301784	ENO1	1
GO:0031669	cellular response to nutrient levels	1/29	257/18986	0.00389105	2.54743	0.976877	0.326675	0.38774	0.304312	MTOR	1
GO:0033044	regulation of chromosome organization	1/29	258/18986	0.00387597	2.53756	0.972556	0.327718	0.387963	0.304488	EXOSC10	1
GO:0099003	vesicle-mediated transport in synapse	1/29	258/18986	0.00387597	2.53756	0.972556	0.327718	0.387963	0.304488	TPRG1L	1
GO:0045927	positive regulation of growth	1/29	259/18986	0.003861	2.52776	0.968256	0.328759	0.388689	0.305057	MTOR	1
GO:0050870	positive regulation of T cell activation	1/29	260/18986	0.00384615	2.51804	0.963976	0.329798	0.38941	0.305624	MTOR	1
GO:0001649	osteoblast differentiation	1/29	262/18986	0.00381679	2.49882	0.955474	0.331872	0.390337	0.306351	SKI	1
GO:0003015	heart process	1/29	262/18986	0.00381679	2.49882	0.955474	0.331872	0.390337	0.306351	MTOR	1
GO:0005996	monosaccharide metabolic process	1/29	262/18986	0.00381679	2.49882	0.955474	0.331872	0.390337	0.306351	ENO1	1
GO:1901888	regulation of cell junction assembly	1/29	268/18986	0.00373134	2.44287	0.930433	0.338058	0.397098	0.311657	RCC2	1
GO:0032886	regulation of microtubule-based process	1/29	269/18986	0.00371747	2.43379	0.926325	0.339084	0.397788	0.312199	CCNL2	1
GO:0009636	response to toxic substance	1/29	270/18986	0.0037037	2.42478	0.922235	0.340108	0.397961	0.312334	UBIAD1	1
GO:0070663	regulation of leukocyte proliferation	1/29	270/18986	0.0037037	2.42478	0.922235	0.340108	0.397961	0.312334	TNFRSF4	1
GO:0002699	positive regulation of immune effector process	1/29	272/18986	0.00367647	2.40695	0.91411	0.342151	0.399837	0.313806	TNFRSF4	1
GO:0110053	regulation of actin filament organization	1/29	273/18986	0.003663	2.39813	0.910074	0.34317	0.400513	0.314337	MTOR	1
GO:0048762	mesenchymal cell differentiation	1/29	274/18986	0.00364964	2.38938	0.906056	0.344188	0.400671	0.314461	MTOR	1
GO:0090068	positive regulation of cell cycle process	1/29	274/18986	0.00364964	2.38938	0.906056	0.344188	0.400671	0.314461	RCC2	1
GO:0032868	response to insulin	1/29	276/18986	0.00362319	2.37206	0.898073	0.34622	0.402519	0.315912	MTOR	1
GO:0034976	response to endoplasmic reticulum stress	1/29	277/18986	0.00361011	2.3635	0.894107	0.347233	0.403181	0.316431	FBXO6	1
GO:0051896	regulation of phosphatidylinositol 3-kinase/protein kinase B signal transduction	1/29	280/18986	0.00357143	2.33818	0.882311	0.350264	0.405663	0.318379	MTOR	1
GO:0090150	establishment of protein localization to membrane	1/29	280/18986	0.00357143	2.33818	0.882311	0.350264	0.405663	0.318379	VAMP3	1
GO:0010721	negative regulation of cell development	1/29	281/18986	0.00355872	2.32986	0.878413	0.351271	0.405794	0.318482	SKI	1
GO:0021537	telencephalon development	1/29	281/18986	0.00355872	2.32986	0.878413	0.351271	0.405794	0.318482	SKI	1
GO:0140014	mitotic nuclear division	1/29	282/18986	0.0035461	2.32159	0.874531	0.352277	0.406439	0.318988	WRAP73	1
GO:0042113	B cell activation	1/29	284/18986	0.00352113	2.30525	0.866816	0.354284	0.407718	0.319992	TNFRSF4	1
GO:1903039	positive regulation of leukocyte cell-cell adhesion	1/29	284/18986	0.00352113	2.30525	0.866816	0.354284	0.407718	0.319992	MTOR	1
GO:0090596	sensory organ morphogenesis	1/29	285/18986	0.00350877	2.29716	0.862982	0.355285	0.408353	0.320491	SKI	1
GO:0043542	endothelial cell migration	1/29	287/18986	0.00348432	2.28115	0.855364	0.357283	0.409613	0.321479	PLEKHG5	1
GO:1901988	negative regulation of cell cycle phase transition	1/29	287/18986	0.00348432	2.28115	0.855364	0.357283	0.409613	0.321479	FBXO6	1
GO:0051258	protein polymerization	1/29	293/18986	0.00341297	2.23444	0.83288	0.363242	0.415919	0.326428	MTOR	1
GO:0016197	endosomal transport	1/29	294/18986	0.00340136	2.22684	0.829185	0.36423	0.416524	0.326904	VAMP3	1
GO:0072659	protein localization to plasma membrane	1/29	295/18986	0.00338983	2.21929	0.825506	0.365216	0.417127	0.327377	VAMP3	1
GO:0045165	cell fate commitment	1/29	297/18986	0.003367	2.20434	0.818191	0.367184	0.417799	0.327904	MTOR	1
GO:0046651	lymphocyte proliferation	1/29	297/18986	0.003367	2.20434	0.818191	0.367184	0.417799	0.327904	TNFRSF4	1
GO:0051962	positive regulation of nervous system development	1/29	297/18986	0.003367	2.20434	0.818191	0.367184	0.417799	0.327904	MTOR	1
GO:0048511	rhythmic process	1/29	299/18986	0.00334448	2.1896	0.810934	0.369147	0.419506	0.329244	MTOR	1
GO:0051056	regulation of small GTPase mediated signal transduction	1/29	300/18986	0.00333333	2.1823	0.807327	0.370126	0.420093	0.329704	PLEKHG5	1
GO:0032943	mononuclear cell proliferation	1/29	305/18986	0.00327869	2.14652	0.7895	0.374999	0.424562	0.333212	TNFRSF4	1
GO:0043122	regulation of canonical NF-kappaB signal transduction	1/29	305/18986	0.00327869	2.14652	0.7895	0.374999	0.424562	0.333212	PLEKHG5	1
GO:0071560	cellular response to transforming growth factor beta stimulus	1/29	306/18986	0.00326797	2.13951	0.785976	0.375969	0.425131	0.333658	SKI	1
GO:0048193	Golgi vesicle transport	1/29	308/18986	0.00324675	2.12562	0.778968	0.377905	0.426788	0.334959	VAMP3	1
GO:0071559	response to transforming growth factor beta	1/29	313/18986	0.00319489	2.09166	0.761679	0.38272	0.431689	0.338805	SKI	1
GO:0007162	negative regulation of cell adhesion	1/29	314/18986	0.00318471	2.085	0.75826	0.383679	0.432234	0.339233	RCC2	1
GO:0002366	leukocyte activation involved in immune response	1/29	315/18986	0.0031746	2.07838	0.754854	0.384636	0.432775	0.339658	MTOR	1
GO:0042254	ribosome biogenesis	1/29	317/18986	0.00315457	2.06527	0.748078	0.386546	0.433849	0.340501	EXOSC10	1
GO:0043491	phosphatidylinositol 3-kinase/protein kinase B signal transduction	1/29	317/18986	0.00315457	2.06527	0.748078	0.386546	0.433849	0.340501	MTOR	1
GO:0002263	cell activation involved in immune response	1/29	319/18986	0.0031348	2.05232	0.741353	0.388451	0.435448	0.341756	MTOR	1
GO:0030217	T cell differentiation	1/29	320/18986	0.003125	2.04591	0.738008	0.389401	0.435962	0.342159	MTOR	1
GO:0034504	protein localization to nucleus	1/29	321/18986	0.00311526	2.03953	0.734676	0.390349	0.435962	0.342159	MTOR	1
GO:0062197	cellular response to chemical stress	1/29	321/18986	0.00311526	2.03953	0.734676	0.390349	0.435962	0.342159	MTOR	1
GO:0044403	biological process involved in symbiotic interaction	1/29	322/18986	0.00310559	2.0332	0.731355	0.391296	0.436483	0.342568	TNFRSF4	1
GO:0019058	viral life cycle	1/29	323/18986	0.00309598	2.0269	0.728047	0.392242	0.437001	0.342974	TNFRSF4	1
GO:0045862	positive regulation of proteolysis	1/29	325/18986	0.00307692	2.01443	0.721466	0.39413	0.438566	0.344202	ENO1	1
GO:0090092	regulation of transmembrane receptor protein serine/threonine kinase signaling pathway	1/29	326/18986	0.00306748	2.00825	0.718193	0.395071	0.439045	0.344579	SKI	1
GO:0007249	canonical NF-kappaB signal transduction	1/29	327/18986	0.0030581	2.00211	0.714931	0.396011	0.439045	0.344579	PLEKHG5	1
GO:0097193	intrinsic apoptotic signaling pathway	1/29	327/18986	0.0030581	2.00211	0.714931	0.396011	0.439045	0.344579	ENO1	1
GO:0060326	cell chemotaxis	1/29	328/18986	0.00304878	1.99601	0.711681	0.39695	0.43955	0.344975	PLEKHG5	1
GO:0010948	negative regulation of cell cycle process	1/29	329/18986	0.00303951	1.98994	0.708442	0.397887	0.440051	0.345368	FBXO6	1
GO:0051345	positive regulation of hydrolase activity	1/29	331/18986	0.00302115	1.97791	0.701999	0.399758	0.441582	0.346569	RCC2	1
GO:0022409	positive regulation of cell-cell adhesion	1/29	336/18986	0.00297619	1.94848	0.686086	0.404409	0.446177	0.350176	MTOR	1
GO:1902105	regulation of leukocyte differentiation	1/29	337/18986	0.00296736	1.9427	0.682936	0.405335	0.446591	0.350501	MTOR	1
GO:0000377	RNA splicing, via transesterification reactions with bulged adenosine as nucleophile	1/29	338/18986	0.00295858	1.93695	0.679796	0.40626	0.446591	0.350501	EXOSC10	1
GO:0000398	mRNA splicing, via spliceosome	1/29	338/18986	0.00295858	1.93695	0.679796	0.40626	0.446591	0.350501	EXOSC10	1
GO:0060485	mesenchyme development	1/29	341/18986	0.00293255	1.91991	0.670442	0.409026	0.44793	0.351552	MTOR	1
GO:0070661	leukocyte proliferation	1/29	341/18986	0.00293255	1.91991	0.670442	0.409026	0.44793	0.351552	TNFRSF4	1
GO:0000375	RNA splicing, via transesterification reactions	1/29	342/18986	0.00292398	1.9143	0.667345	0.409945	0.44793	0.351552	EXOSC10	1
GO:0071214	cellular response to abiotic stimulus	1/29	342/18986	0.00292398	1.9143	0.667345	0.409945	0.44793	0.351552	MTOR	1
GO:0104004	cellular response to environmental stimulus	1/29	342/18986	0.00292398	1.9143	0.667345	0.409945	0.44793	0.351552	MTOR	1
GO:0019216	regulation of lipid metabolic process	1/29	344/18986	0.00290698	1.90317	0.661182	0.411779	0.449394	0.352701	MTOR	1
GO:0030111	regulation of Wnt signaling pathway	1/29	349/18986	0.00286533	1.8759	0.645951	0.416341	0.453827	0.35618	SKI	1
GO:0016042	lipid catabolic process	1/29	351/18986	0.002849	1.86521	0.639928	0.418156	0.455259	0.357304	ACOT7	1
GO:0032956	regulation of actin cytoskeleton organization	1/29	352/18986	0.00284091	1.85991	0.636931	0.419061	0.455698	0.357648	MTOR	1
GO:0006402	mRNA catabolic process	1/29	356/18986	0.00280899	1.83902	0.625041	0.42267	0.458523	0.359866	EXOSC10	1
GO:0015980	energy derivation by oxidation of organic compounds	1/29	356/18986	0.00280899	1.83902	0.625041	0.42267	0.458523	0.359866	MTOR	1
GO:0046942	carboxylic acid transport	1/29	357/18986	0.00280112	1.83386	0.622092	0.423568	0.45895	0.360201	RBP7	1
GO:0015849	organic acid transport	1/29	358/18986	0.0027933	1.82874	0.619152	0.424466	0.459374	0.360534	RBP7	1
GO:0043010	camera-type eye development	1/29	362/18986	0.00276243	1.80853	0.607486	0.428042	0.462005	0.362599	SKI	1
GO:1990778	protein localization to cell periphery	1/29	362/18986	0.00276243	1.80853	0.607486	0.428042	0.462005	0.362599	VAMP3	1
GO:0006066	alcohol metabolic process	1/29	363/18986	0.00275482	1.80355	0.604592	0.428932	0.462005	0.362599	DHRS3	1
GO:0051090	regulation of DNA-binding transcription factor activity	1/29	363/18986	0.00275482	1.80355	0.604592	0.428932	0.462005	0.362599	TNFRSF4	1
GO:0045787	positive regulation of cell cycle	1/29	365/18986	0.00273973	1.79367	0.598831	0.430709	0.46337	0.36367	RCC2	1
GO:0009895	negative regulation of catabolic process	1/29	367/18986	0.0027248	1.7839	0.593106	0.432481	0.464726	0.364734	MTOR	1
GO:1901990	regulation of mitotic cell cycle phase transition	1/29	368/18986	0.00271739	1.77905	0.590257	0.433365	0.465125	0.365047	RCC2	1
GO:0007517	muscle organ development	1/29	369/18986	0.00271003	1.77423	0.587416	0.434248	0.465522	0.365359	SKI	1
GO:0010506	regulation of autophagy	1/29	373/18986	0.00268097	1.7552	0.57614	0.437765	0.468739	0.367884	MTOR	1
GO:0090287	regulation of cellular response to growth factor stimulus	1/29	381/18986	0.00262467	1.71835	0.553988	0.444736	0.475642	0.373302	SKI	1
GO:0030522	intracellular receptor signaling pathway	1/29	384/18986	0.00260417	1.70492	0.545815	0.447329	0.477852	0.375036	DHRS3	1
GO:0016050	vesicle organization	1/29	386/18986	0.00259067	1.69609	0.540406	0.449051	0.479128	0.376037	VAMP3	1
GO:0031647	regulation of protein stability	1/29	387/18986	0.00258398	1.6917	0.537713	0.44991	0.479481	0.376314	MTOR	1
GO:0007281	germ cell development	1/29	390/18986	0.0025641	1.67869	0.529681	0.452479	0.481654	0.37802	MTOR	1
GO:0009100	glycoprotein metabolic process	1/29	392/18986	0.00255102	1.67013	0.524364	0.454185	0.48234	0.378558	FBXO6	1
GO:1903037	regulation of leukocyte cell-cell adhesion	1/29	392/18986	0.00255102	1.67013	0.524364	0.454185	0.48234	0.378558	MTOR	1
GO:0050863	regulation of T cell activation	1/29	393/18986	0.00254453	1.66588	0.521717	0.455037	0.482679	0.378824	MTOR	1
GO:0032970	regulation of actin filament-based process	1/29	395/18986	0.00253165	1.65744	0.516445	0.456735	0.483916	0.379795	MTOR	1
GO:0141091	transforming growth factor beta receptor superfamily signaling pathway	1/29	397/18986	0.00251889	1.64909	0.511203	0.458429	0.485144	0.380759	SKI	1
GO:0060271	cilium assembly	1/29	398/18986	0.00251256	1.64495	0.508593	0.459274	0.485472	0.381016	WRAP73	1
GO:0002460	adaptive immune response based on somatic recombination of immune receptors built from immunoglobulin superfamily domains	1/29	400/18986	0.0025	1.63672	0.503394	0.46096	0.486123	0.381527	MTOR	1
GO:1902903	regulation of supramolecular fiber organization	1/29	400/18986	0.0025	1.63672	0.503394	0.46096	0.486123	0.381527	MTOR	1
GO:2001233	regulation of apoptotic signaling pathway	1/29	403/18986	0.00248139	1.62454	0.495649	0.463479	0.488212	0.383167	ENO1	1
GO:0006631	fatty acid metabolic process	1/29	405/18986	0.00246914	1.61652	0.490521	0.465153	0.489407	0.384105	ACOT7	1
GO:1903311	regulation of mRNA metabolic process	1/29	406/18986	0.00246305	1.61254	0.487968	0.465987	0.489718	0.384349	EXOSC10	1
GO:0002697	regulation of immune effector process	1/29	410/18986	0.00243902	1.5968	0.477823	0.469314	0.492644	0.386645	TNFRSF4	1
GO:0001654	eye development	1/29	411/18986	0.00243309	1.59292	0.475304	0.470142	0.492944	0.38688	SKI	1
GO:0006401	RNA catabolic process	1/29	412/18986	0.00242718	1.58905	0.472791	0.470969	0.493241	0.387114	EXOSC10	1
GO:0150063	visual system development	1/29	415/18986	0.00240964	1.57757	0.465294	0.473444	0.495261	0.388699	SKI	1
GO:0030900	forebrain development	1/29	416/18986	0.00240385	1.57377	0.462808	0.474266	0.495551	0.388926	SKI	1
GO:0048880	sensory system development	1/29	422/18986	0.00236967	1.5514	0.448027	0.479173	0.500103	0.392499	SKI	1
GO:0007178	cell surface receptor protein serine/threonine kinase signaling pathway	1/29	425/18986	0.00235294	1.54045	0.440723	0.481611	0.500882	0.39311	SKI	1
GO:0009615	response to virus	1/29	425/18986	0.00235294	1.54045	0.440723	0.481611	0.500882	0.39311	ENO1	1
GO:0140694	non-membrane-bounded organelle assembly	1/29	425/18986	0.00235294	1.54045	0.440723	0.481611	0.500882	0.39311	WRAP73	1
GO:0030098	lymphocyte differentiation	1/29	426/18986	0.00234742	1.53683	0.438301	0.482421	0.500882	0.39311	MTOR	1
GO:0022412	cellular process involved in reproduction in multicellular organism	1/29	427/18986	0.00234192	1.53323	0.435885	0.483229	0.500882	0.39311	MTOR	1
GO:0044782	cilium organization	1/29	427/18986	0.00234192	1.53323	0.435885	0.483229	0.500882	0.39311	WRAP73	1
GO:0003002	regionalization	1/29	430/18986	0.00232558	1.52253	0.428673	0.485648	0.502242	0.394178	SKI	1
GO:0007159	leukocyte cell-cell adhesion	1/29	430/18986	0.00232558	1.52253	0.428673	0.485648	0.502242	0.394178	MTOR	1
GO:0043254	regulation of protein-containing complex assembly	1/29	433/18986	0.00230947	1.51199	0.421516	0.488056	0.503585	0.395232	MTOR	1
GO:1903706	regulation of hemopoiesis	1/29	433/18986	0.00230947	1.51199	0.421516	0.488056	0.503585	0.395232	MTOR	1
GO:0141188	nucleic acid catabolic process	1/29	441/18986	0.00226757	1.48456	0.402689	0.494424	0.509577	0.399934	EXOSC10	1
GO:0042060	wound healing	1/29	444/18986	0.00225225	1.47453	0.395724	0.496792	0.511437	0.401394	MTOR	1
GO:0000280	nuclear division	1/29	451/18986	0.00221729	1.45164	0.379668	0.502277	0.514965	0.404164	WRAP73	1
GO:0009410	response to xenobiotic stimulus	1/29	451/18986	0.00221729	1.45164	0.379668	0.502277	0.514965	0.404164	MTHFR	1
GO:0030099	myeloid cell differentiation	1/29	451/18986	0.00221729	1.45164	0.379668	0.502277	0.514965	0.404164	MTOR	1
GO:0007005	mitochondrion organization	1/29	452/18986	0.00221239	1.44843	0.377396	0.503055	0.514965	0.404164	ATAD3B	1
GO:0016032	viral process	1/29	452/18986	0.00221239	1.44843	0.377396	0.503055	0.514965	0.404164	TNFRSF4	1
GO:0001934	positive regulation of protein phosphorylation	1/29	455/18986	0.0021978	1.43888	0.370612	0.505384	0.516767	0.405578	MTOR	1
GO:0006869	lipid transport	1/29	459/18986	0.00217865	1.42634	0.361642	0.508474	0.519341	0.407598	RBP7	1
GO:0010720	positive regulation of cell development	1/29	460/18986	0.00217391	1.42324	0.359412	0.509243	0.519542	0.407756	MTOR	1
GO:0006417	regulation of translation	1/29	461/18986	0.0021692	1.42015	0.357188	0.510011	0.519742	0.407913	MTOR	1
GO:0015711	organic anion transport	1/29	462/18986	0.0021645	1.41708	0.354968	0.510778	0.51994	0.408068	RBP7	1
GO:0007015	actin filament organization	1/29	465/18986	0.00215054	1.40793	0.348341	0.513073	0.521488	0.409283	MTOR	1
GO:0042391	regulation of membrane potential	1/29	466/18986	0.00214592	1.40491	0.346142	0.513835	0.521488	0.409283	MTOR	1
GO:0044772	mitotic cell cycle phase transition	1/29	467/18986	0.00214133	1.40191	0.343948	0.514596	0.521488	0.409283	RCC2	1
GO:0051051	negative regulation of transport	1/29	467/18986	0.00214133	1.40191	0.343948	0.514596	0.521488	0.409283	VAMP3	1
GO:0006935	chemotaxis	1/29	472/18986	0.00211864	1.38705	0.333052	0.518385	0.524158	0.411378	PLEKHG5	1
GO:0031329	regulation of cellular catabolic process	1/29	472/18986	0.00211864	1.38705	0.333052	0.518385	0.524158	0.411378	MTOR	1
GO:0042330	taxis	1/29	474/18986	0.0021097	1.3812	0.328728	0.519893	0.525098	0.412116	PLEKHG5	1
GO:0007389	pattern specification process	1/29	476/18986	0.00210084	1.3754	0.324423	0.521396	0.525447	0.41239	SKI	1
GO:0016055	Wnt signaling pathway	1/29	476/18986	0.00210084	1.3754	0.324423	0.521396	0.525447	0.41239	SKI	1
GO:0042327	positive regulation of phosphorylation	1/29	479/18986	0.00208768	1.36678	0.318002	0.523642	0.527125	0.413707	MTOR	1
GO:0043086	negative regulation of catalytic activity	1/29	486/18986	0.00205761	1.3471	0.303182	0.528844	0.531772	0.417354	RCC2	1
GO:0051656	establishment of organelle localization	1/29	488/18986	0.00204918	1.34158	0.298989	0.53032	0.532666	0.418056	RCC2	1
GO:0007264	small GTPase-mediated signal transduction	1/29	491/18986	0.00203666	1.33338	0.292734	0.532525	0.534291	0.419331	PLEKHG5	1
GO:0022613	ribonucleoprotein complex biogenesis	1/29	492/18986	0.00203252	1.33067	0.290657	0.533258	0.534435	0.419444	EXOSC10	1
GO:0023061	signal release	1/29	493/18986	0.0020284	1.32797	0.288586	0.53399	0.534579	0.419557	TPRG1L	1
GO:0045785	positive regulation of cell adhesion	1/29	499/18986	0.00200401	1.312	0.276246	0.538358	0.538358	0.422523	MTOR	1
Table S20: Go Enrichment Analysis (CC) of the Top30 Genes in Endothelial Cells of the Testing set (pvalueCutoff = 1, qvalueCutoff = 1)
ID	Description	GeneRatio	BgRatio	RichFactor	FoldEnrichment	zScore	pvalue	p.adjust	qvalue	geneID	Count
GO:0016605	PML body	2/30	109/19960	0.0183486	12.208	4.55223	0.0116344	0.245014	0.210334	SKI/MTOR	2
GO:0101019	nucleolar exosome (RNase complex)	1/30	10/19960	0.1	66.5333	8.04206	0.0149322	0.245014	0.210334	EXOSC10	1
GO:0030139	endocytic vesicle	3/30	356/19960	0.00842697	5.60674	3.40269	0.0159955	0.245014	0.210334	PLEKHG5/VAMP3/MTOR	3
GO:0038201	TOR complex	1/30	12/19960	0.0833333	55.4444	7.31932	0.0178926	0.245014	0.210334	MTOR	1
GO:0043240	Fanconi anaemia nuclear complex	1/30	13/19960	0.0769231	51.1795	7.02159	0.0193696	0.245014	0.210334	FAAP20	1
GO:0045335	phagocytic vesicle	2/30	145/19960	0.0137931	9.17701	3.83405	0.0199592	0.245014	0.210334	VAMP3/MTOR	2
GO:1990023	mitotic spindle midzone	1/30	14/19960	0.0714286	47.5238	6.75597	0.0208445	0.245014	0.210334	RCC2	1
GO:0000176	nuclear exosome (RNase complex)	1/30	16/19960	0.0625	41.5833	6.30054	0.0237877	0.245014	0.210334	EXOSC10	1
GO:0000177	cytoplasmic exosome (RNase complex)	1/30	16/19960	0.0625	41.5833	6.30054	0.0237877	0.245014	0.210334	EXOSC10	1
GO:0042622	photoreceptor outer segment membrane	1/30	16/19960	0.0625	41.5833	6.30054	0.0237877	0.245014	0.210334	DHRS3	1
GO:0034506	chromosome, centromeric core domain	1/30	19/19960	0.0526316	35.0175	5.75549	0.0281866	0.247048	0.21208	RCC2	1
GO:0044305	calyx of Held	1/30	21/19960	0.047619	31.6825	5.4579	0.0311086	0.247048	0.21208	TPRG1L	1
GO:0000178	exosome (RNase complex)	1/30	23/19960	0.0434783	28.9275	5.19928	0.034022	0.247048	0.21208	EXOSC10	1
GO:0031901	early endosome membrane	2/30	200/19960	0.01	6.65333	3.11747	0.0361626	0.247048	0.21208	VAMP3/RCC2	2
GO:0044322	endoplasmic reticulum quality control compartment	1/30	25/19960	0.04	26.6133	4.97169	0.036927	0.247048	0.21208	FBXO6	1
GO:1905354	exoribonuclease complex	1/30	26/19960	0.0384615	25.5897	4.86766	0.0383763	0.247048	0.21208	EXOSC10	1
GO:0031430	M band	1/30	28/19960	0.0357143	23.7619	4.67615	0.0412686	0.250039	0.214648	ENO1	1
GO:0005640	nuclear outer membrane	1/30	31/19960	0.0322581	21.4624	4.42354	0.0455913	0.252376	0.216654	ENO1	1
GO:0031461	cullin-RING ubiquitin ligase complex	2/30	230/19960	0.00869565	5.78551	2.83207	0.0465549	0.252376	0.216654	KLHL21/FBXO6	2
GO:0031968	organelle outer membrane	2/30	252/19960	0.00793651	5.28042	2.65303	0.0547918	0.26033	0.223482	ENO1/MTOR	2
GO:0019867	outer membrane	2/30	254/19960	0.00787402	5.23885	2.6378	0.0555648	0.26033	0.223482	ENO1/MTOR	2
GO:0051233	spindle midzone	1/30	38/19960	0.0263158	17.5088	3.952	0.0556045	0.26033	0.223482	RCC2	1
GO:0031672	A band	1/30	41/19960	0.0243902	16.2276	3.78675	0.0598647	0.26809	0.230144	ENO1	1
GO:0031201	SNARE complex	1/30	50/19960	0.02	13.3067	3.38039	0.0725342	0.311293	0.267231	VAMP3	1
GO:0000307	cyclin-dependent protein kinase holoenzyme complex	1/30	59/19960	0.0169492	11.2768	3.06707	0.0850386	0.317152	0.272262	CCNL2	1
GO:0031463	Cul3-RING ubiquitin ligase complex	1/30	59/19960	0.0169492	11.2768	3.06707	0.0850386	0.317152	0.272262	KLHL21	1
GO:0005938	cell cortex	2/30	325/19960	0.00615385	4.09436	2.18209	0.0853349	0.317152	0.272262	ENO1/AGTRAP	2
GO:0101003	ficolin-1-rich granule membrane	1/30	61/19960	0.0163934	10.9071	3.00658	0.0877951	0.317152	0.272262	ATAD3B	1
GO:0000791	euchromatin	1/30	63/19960	0.015873	10.5608	2.94883	0.0905436	0.317152	0.272262	EXOSC10	1
GO:0019005	SCF ubiquitin ligase complex	1/30	65/19960	0.0153846	10.2359	2.89361	0.0932841	0.317152	0.272262	FBXO6	1
GO:0000151	ubiquitin ligase complex	2/30	355/19960	0.0056338	3.74836	2.02712	0.0991044	0.317152	0.272262	KLHL21/FBXO6	2
GO:0032040	small-subunit processome	1/30	74/19960	0.0135135	8.99099	2.67189	0.105518	0.317152	0.272262	EXOSC10	1
GO:0030669	clathrin-coated endocytic vesicle membrane	1/30	75/19960	0.0133333	8.87111	2.6496	0.106867	0.317152	0.272262	VAMP3	1
GO:0060170	ciliary membrane	1/30	78/19960	0.0128205	8.52991	2.58514	0.110904	0.317152	0.272262	DHRS3	1
GO:0017053	transcription repressor complex	1/30	79/19960	0.0126582	8.42194	2.56441	0.112245	0.317152	0.272262	SKI	1
GO:0030670	phagocytic vesicle membrane	1/30	82/19960	0.0121951	8.11382	2.50438	0.116258	0.317152	0.272262	VAMP3	1
GO:0005876	spindle microtubule	1/30	83/19960	0.0120482	8.01606	2.48504	0.117592	0.317152	0.272262	KLHL21	1
GO:0098687	chromosomal region	2/30	404/19960	0.0049505	3.29373	1.80705	0.122825	0.317152	0.272262	ZBTB48/RCC2	2
GO:0048786	presynaptic active zone	1/30	89/19960	0.011236	7.47566	2.37545	0.125554	0.317152	0.272262	TPRG1L	1
GO:0045334	clathrin-coated endocytic vesicle	1/30	93/19960	0.0107527	7.15412	2.3079	0.130823	0.317152	0.272262	VAMP3	1
GO:0001750	photoreceptor outer segment	1/30	96/19960	0.0104167	6.93056	2.25982	0.134755	0.317152	0.272262	DHRS3	1
GO:0005819	spindle	2/30	434/19960	0.00460829	3.06605	1.68832	0.137986	0.317152	0.272262	KLHL21/RCC2	2
GO:0005769	early endosome	2/30	438/19960	0.00456621	3.03805	1.67327	0.140039	0.317152	0.272262	VAMP3/RCC2	2
GO:0005765	lysosomal membrane	2/30	447/19960	0.00447427	2.97688	1.64002	0.144684	0.317152	0.272262	MTOR/CLCN6	2
GO:0098852	lytic vacuole membrane	2/30	447/19960	0.00447427	2.97688	1.64002	0.144684	0.317152	0.272262	MTOR/CLCN6	2
GO:0005811	lipid droplet	1/30	106/19960	0.00943396	6.27673	2.11334	0.147737	0.317152	0.272262	DHRS3	1
GO:0030684	preribosome	1/30	106/19960	0.00943396	6.27673	2.11334	0.147737	0.317152	0.272262	EXOSC10	1
GO:0030133	transport vesicle	2/30	453/19960	0.00441501	2.93745	1.61831	0.147799	0.317152	0.272262	TPRG1L/VAMP3	2
GO:0055038	recycling endosome membrane	1/30	109/19960	0.00917431	6.10398	2.07304	0.151594	0.318658	0.273554	VAMP3	1
GO:0032588	trans-Golgi network membrane	1/30	112/19960	0.00892857	5.94048	2.03421	0.155435	0.320197	0.274875	VAMP3	1
GO:0043679	axon terminus	1/30	117/19960	0.00854701	5.68661	1.97253	0.161799	0.320668	0.275279	TPRG1L	1
GO:0005874	microtubule	2/30	489/19960	0.00408998	2.7212	1.49509	0.16678	0.320668	0.275279	KLHL21/RCC2	2
GO:0005774	vacuolar membrane	2/30	491/19960	0.00407332	2.71012	1.48857	0.167847	0.320668	0.275279	MTOR/CLCN6	2
GO:0097733	photoreceptor cell cilium	1/30	122/19960	0.00819672	5.45355	1.91432	0.168117	0.320668	0.275279	DHRS3	1
GO:0005635	nuclear envelope	2/30	498/19960	0.00401606	2.67202	1.46602	0.171594	0.320751	0.275351	ENO1/MTOR	2
GO:0034451	centriolar satellite	1/30	127/19960	0.00787402	5.23885	1.85922	0.174389	0.320751	0.275351	WRAP73	1
GO:0044306	neuron projection terminus	1/30	133/19960	0.0075188	5.00251	1.79682	0.181855	0.322544	0.27689	TPRG1L	1
GO:0097731	9+0 non-motile cilium	1/30	134/19960	0.00746269	4.96517	1.78679	0.183092	0.322544	0.27689	DHRS3	1
GO:0030665	clathrin-coated vesicle membrane	1/30	138/19960	0.00724638	4.82126	1.74763	0.188026	0.322544	0.27689	VAMP3	1
GO:1902554	serine/threonine protein kinase complex	1/30	139/19960	0.00719424	4.78657	1.73807	0.189255	0.322544	0.27689	CCNL2	1
GO:0030672	synaptic vesicle membrane	1/30	143/19960	0.00699301	4.65268	1.70074	0.194153	0.322544	0.27689	TPRG1L	1
GO:0099501	exocytic vesicle membrane	1/30	143/19960	0.00699301	4.65268	1.70074	0.194153	0.322544	0.27689	TPRG1L	1
GO:1902911	protein kinase complex	1/30	153/19960	0.00653595	4.34858	1.61315	0.206272	0.337238	0.289504	CCNL2	1
GO:0005814	centriole	1/30	163/19960	0.00613497	4.0818	1.53276	0.218215	0.347664	0.298455	WRAP73	1
GO:0070820	tertiary granule	1/30	164/19960	0.00609756	4.05691	1.52508	0.2194	0.347664	0.298455	ATAD3B	1
GO:0097730	non-motile cilium	1/30	171/19960	0.00584795	3.89084	1.47294	0.227644	0.348886	0.299503	DHRS3	1
GO:0000781	chromosome, telomeric region	1/30	173/19960	0.00578035	3.84586	1.45855	0.229984	0.348886	0.299503	ZBTB48	1
GO:0031902	late endosome membrane	1/30	175/19960	0.00571429	3.8019	1.44438	0.232317	0.348886	0.299503	CLCN6	1
GO:0000922	spindle pole	1/30	180/19960	0.00555556	3.6963	1.40983	0.23812	0.348886	0.299503	KLHL21	1
GO:0036064	ciliary basal body	1/30	180/19960	0.00555556	3.6963	1.40983	0.23812	0.348886	0.299503	WRAP73	1
GO:0072686	mitotic spindle	1/30	184/19960	0.00543478	3.61594	1.38307	0.242732	0.348886	0.299503	RCC2	1
GO:0101002	ficolin-1-rich granule	1/30	185/19960	0.00540541	3.5964	1.3765	0.243881	0.348886	0.299503	ATAD3B	1
GO:0030027	lamellipodium	1/30	203/19960	0.00492611	3.2775	1.26539	0.264273	0.363923	0.312412	PLEKHG5	1
GO:0030662	coated vesicle membrane	1/30	205/19960	0.00487805	3.24553	1.25381	0.266506	0.363923	0.312412	VAMP3	1
GO:0030496	midbody	1/30	207/19960	0.00483092	3.21417	1.24238	0.268732	0.363923	0.312412	RCC2	1
GO:0030666	endocytic vesicle membrane	1/30	207/19960	0.00483092	3.21417	1.24238	0.268732	0.363923	0.312412	VAMP3	1
GO:0055037	recycling endosome	1/30	210/19960	0.0047619	3.16825	1.2255	0.272059	0.363923	0.312412	VAMP3	1
GO:0005882	intermediate filament	1/30	218/19960	0.00458716	3.05199	1.18191	0.28086	0.36407	0.312538	IFFO2	1
GO:0030136	clathrin-coated vesicle	1/30	220/19960	0.00454545	3.02424	1.17132	0.283044	0.36407	0.312538	VAMP3	1
GO:0030017	sarcomere	1/30	222/19960	0.0045045	2.997	1.16086	0.285221	0.36407	0.312538	ENO1	1
GO:0005741	mitochondrial outer membrane	1/30	223/19960	0.0044843	2.98356	1.15567	0.286308	0.36407	0.312538	MTOR	1
GO:0008021	synaptic vesicle	1/30	233/19960	0.00429185	2.85551	1.10532	0.297084	0.373167	0.320347	TPRG1L	1
GO:0032993	protein-DNA complex	1/30	240/19960	0.00416667	2.77222	1.07163	0.304534	0.373615	0.320733	ZBTB17	1
GO:0030016	myofibril	1/30	243/19960	0.00411523	2.738	1.05757	0.307703	0.373615	0.320733	ENO1	1
GO:0043292	contractile muscle fiber	1/30	253/19960	0.00395257	2.62978	1.01217	0.318167	0.373615	0.320733	ENO1	1
GO:0070382	exocytic vesicle	1/30	253/19960	0.00395257	2.62978	1.01217	0.318167	0.373615	0.320733	TPRG1L	1
GO:0030658	transport vesicle membrane	1/30	254/19960	0.00393701	2.61942	1.00775	0.319205	0.373615	0.320733	TPRG1L	1
GO:0045111	intermediate filament cytoskeleton	1/30	254/19960	0.00393701	2.61942	1.00775	0.319205	0.373615	0.320733	IFFO2	1
GO:0000775	chromosome, centromeric region	1/30	262/19960	0.00381679	2.53944	0.973148	0.327454	0.378964	0.325324	RCC2	1
GO:0005802	trans-Golgi network	1/30	269/19960	0.00371747	2.47336	0.943902	0.334593	0.382923	0.328723	VAMP3	1
GO:0150034	distal axon	1/30	281/19960	0.00355872	2.36773	0.895839	0.34666	0.392373	0.336835	TPRG1L	1
GO:0045121	membrane raft	1/30	293/19960	0.00341297	2.27076	0.850169	0.358515	0.399231	0.342723	EFHD2	1
GO:0098857	membrane microdomain	1/30	295/19960	0.00338983	2.25537	0.842774	0.360471	0.399231	0.342723	EFHD2	1
GO:0061695	transferase complex, transferring phosphorus-containing groups	1/30	302/19960	0.00331126	2.20309	0.817351	0.36727	0.402434	0.345473	CCNL2	1
GO:0031965	nuclear membrane	1/30	312/19960	0.00320513	2.13248	0.782212	0.376862	0.404049	0.346859	ENO1	1
GO:0005770	late endosome	1/30	318/19960	0.00314465	2.09224	0.761757	0.38255	0.404049	0.346859	CLCN6	1
GO:0030135	coated vesicle	1/30	320/19960	0.003125	2.07917	0.755039	0.384435	0.404049	0.346859	VAMP3	1
GO:0030667	secretory granule membrane	1/30	320/19960	0.003125	2.07917	0.755039	0.384435	0.404049	0.346859	ATAD3B	1
GO:0031253	cell projection membrane	1/30	358/19960	0.0027933	1.85847	0.635908	0.419206	0.436143	0.37441	DHRS3	1
GO:0098791	Golgi apparatus subcompartment	1/30	391/19960	0.00255754	1.70162	0.543604	0.447854	0.46129	0.395998	VAMP3	1
GO:0009897	external side of plasma membrane	1/30	407/19960	0.002457	1.63473	0.501941	0.461248	0.470382	0.403803	TNFRSF4	1
GO:0016607	nuclear speck	1/30	416/19960	0.00240385	1.59936	0.479295	0.468644	0.473238	0.406255	CCNL2	1
GO:0031252	cell leading edge	1/30	433/19960	0.00230947	1.53657	0.437952	0.482346	0.482346	0.414073	PLEKHG5	1
Table S20: Go Enrichment Analysis (MF) of the Top30 Genes in Endothelial Cells of the Testing set (pvalueCutoff = 1, qvalueCutoff = 1)
ID	Description	GeneRatio	BgRatio	RichFactor	FoldEnrichment	zScore	pvalue	p.adjust	qvalue	geneID	Count
GO:0001227	DNA-binding transcription repressor activity, RNA polymerase II-specific	3/29	268/18737	0.011194	7.2325	4.04606	0.00803289	0.200554	0.165216	SKI/ENO1/ZBTB17	3
GO:0001217	DNA-binding transcription repressor activity	3/29	278/18737	0.0107914	6.97234	3.9499	0.00887753	0.200554	0.165216	SKI/ENO1/ZBTB17	3
GO:0001221	transcription coregulator binding	2/29	117/18737	0.017094	11.0445	4.29097	0.0140608	0.200554	0.165216	ENO1/ZBTB17	2
GO:0000182	rDNA binding	1/29	10/18737	0.1	64.6103	7.92168	0.0153737	0.200554	0.165216	MTOR	1
GO:0005031	tumor necrosis factor receptor activity	1/29	10/18737	0.1	64.6103	7.92168	0.0153737	0.200554	0.165216	TNFRSF4	1
GO:0005247	voltage-gated chloride channel activity	1/29	12/18737	0.0833333	53.842	7.20912	0.0184209	0.200554	0.165216	CLCN6	1
GO:0005035	death receptor activity	1/29	13/18737	0.0769231	49.7003	6.91556	0.0199412	0.200554	0.165216	TNFRSF4	1
GO:0052650	all-trans-retinol dehydrogenase (NADP+) activity	1/29	13/18737	0.0769231	49.7003	6.91556	0.0199412	0.200554	0.165216	DHRS3	1
GO:0052816	long-chain fatty acyl-CoA hydrolase activity	1/29	14/18737	0.0714286	46.1502	6.65365	0.0214591	0.200554	0.165216	ACOT7	1
GO:0000062	fatty-acyl-CoA binding	1/29	16/18737	0.0625	40.3815	6.20456	0.0244881	0.200554	0.165216	ACOT7	1
GO:0019841	retinol binding	1/29	16/18737	0.0625	40.3815	6.20456	0.0244881	0.200554	0.165216	RBP7	1
GO:0004659	prenyltransferase activity	1/29	17/18737	0.0588235	38.0061	6.00992	0.0259993	0.200554	0.165216	UBIAD1	1
GO:0140036	ubiquitin-modified protein reader activity	1/29	17/18737	0.0588235	38.0061	6.00992	0.0259993	0.200554	0.165216	FAAP20	1
GO:0008308	voltage-gated monoatomic anion channel activity	1/29	18/18737	0.0555556	35.8946	5.83146	0.0275081	0.200554	0.165216	CLCN6	1
GO:0016646	oxidoreductase activity, acting on the CH-NH group of donors, NAD or NADP as acceptor	1/29	18/18737	0.0555556	35.8946	5.83146	0.0275081	0.200554	0.165216	MTHFR	1
GO:1901567	fatty acid derivative binding	1/29	18/18737	0.0555556	35.8946	5.83146	0.0275081	0.200554	0.165216	ACOT7	1
GO:0016918	retinal binding	1/29	19/18737	0.0526316	34.0054	5.66704	0.0290147	0.200554	0.165216	RBP7	1
GO:0017075	syntaxin-1 binding	1/29	19/18737	0.0526316	34.0054	5.66704	0.0290147	0.200554	0.165216	VAMP3	1
GO:0120227	acyl-CoA binding	1/29	19/18737	0.0526316	34.0054	5.66704	0.0290147	0.200554	0.165216	ACOT7	1
GO:0004745	all-trans-retinol dehydrogenase (NAD+) activity	1/29	20/18737	0.05	32.3052	5.51489	0.0305191	0.200554	0.165216	DHRS3	1
GO:0140035	ubiquitin-like protein reader activity	1/29	20/18737	0.05	32.3052	5.51489	0.0305191	0.200554	0.165216	FAAP20	1
GO:0070034	telomerase RNA binding	1/29	22/18737	0.0454545	29.3683	5.24172	0.0335211	0.201879	0.166308	EXOSC10	1
GO:0004022	alcohol dehydrogenase (NAD+) activity	1/29	23/18737	0.0434783	28.0915	5.11843	0.0350187	0.201879	0.166308	DHRS3	1
GO:0047617	fatty acyl-CoA hydrolase activity	1/29	25/18737	0.04	25.8441	4.89393	0.0380072	0.201879	0.166308	ACOT7	1
GO:0070530	K63-linked polyubiquitin modification-dependent protein binding	1/29	25/18737	0.04	25.8441	4.89393	0.0380072	0.201879	0.166308	FAAP20	1
GO:0016289	acyl-CoA hydrolase activity	1/29	26/18737	0.0384615	24.8501	4.79129	0.0394981	0.201879	0.166308	ACOT7	1
GO:0097602	cullin family protein binding	1/29	26/18737	0.0384615	24.8501	4.79129	0.0394981	0.201879	0.166308	KLHL21	1
GO:0016645	oxidoreductase activity, acting on the CH-NH group of donors	1/29	28/18737	0.0357143	23.0751	4.60236	0.0424732	0.207322	0.170792	MTHFR	1
GO:0008106	alcohol dehydrogenase (NADP+) activity	1/29	30/18737	0.0333333	21.5368	4.43215	0.0454394	0.207322	0.170792	DHRS3	1
GO:0005085	guanyl-nucleotide exchange factor activity	2/29	230/18737	0.00869565	5.61829	2.7746	0.0490268	0.207322	0.170792	PLEKHG5/RCC2	2
GO:0000175	3'-5'-RNA exonuclease activity	1/29	35/18737	0.0285714	18.4601	4.07062	0.0528162	0.207322	0.170792	EXOSC10	1
GO:0004033	aldo-keto reductase (NADPH) activity	1/29	36/18737	0.0277778	17.9473	4.00722	0.054285	0.207322	0.170792	DHRS3	1
GO:0005484	SNAP receptor activity	1/29	37/18737	0.027027	17.4623	3.94633	0.0557515	0.207322	0.170792	VAMP3	1
GO:0005501	retinoid binding	1/29	38/18737	0.0263158	17.0027	3.88777	0.0572158	0.207322	0.170792	RBP7	1
GO:0016896	RNA exonuclease activity, producing 5'-phosphomonoesters	1/29	38/18737	0.0263158	17.0027	3.88777	0.0572158	0.207322	0.170792	EXOSC10	1
GO:0019840	isoprenoid binding	1/29	38/18737	0.0263158	17.0027	3.88777	0.0572158	0.207322	0.170792	RBP7	1
GO:0042162	telomeric DNA binding	1/29	38/18737	0.0263158	17.0027	3.88777	0.0572158	0.207322	0.170792	ZBTB48	1
GO:0004532	RNA exonuclease activity	1/29	40/18737	0.025	16.1526	3.77707	0.060138	0.207322	0.170792	EXOSC10	1
GO:0071949	FAD binding	1/29	40/18737	0.025	16.1526	3.77707	0.060138	0.207322	0.170792	MTHFR	1
GO:0004812	aminoacyl-tRNA ligase activity	1/29	41/18737	0.0243902	15.7586	3.72466	0.0615957	0.207322	0.170792	LRRC47	1
GO:0016875	ligase activity, forming carbon-oxygen bonds	1/29	41/18737	0.0243902	15.7586	3.72466	0.0615957	0.207322	0.170792	LRRC47	1
GO:0001046	core promoter sequence-specific DNA binding	1/29	43/18737	0.0232558	15.0257	3.62519	0.0645047	0.21089	0.173731	ZBTB17	1
GO:0016790	thiolester hydrolase activity	1/29	44/18737	0.0227273	14.6842	3.57791	0.065956	0.21089	0.173731	ACOT7	1
GO:0001223	transcription coactivator binding	1/29	45/18737	0.0222222	14.3579	3.53215	0.067405	0.21089	0.173731	ZBTB17	1
GO:0005504	fatty acid binding	1/29	47/18737	0.0212766	13.7469	3.44486	0.0702966	0.21089	0.173731	RBP7	1
GO:0016538	cyclin-dependent protein serine/threonine kinase regulator activity	1/29	47/18737	0.0212766	13.7469	3.44486	0.0702966	0.21089	0.173731	CCNL2	1
GO:0001222	transcription corepressor binding	1/29	49/18737	0.0204082	13.1858	3.36274	0.0731796	0.214868	0.177008	ENO1	1
GO:0018455	alcohol dehydrogenase [NAD(P)+] activity	1/29	52/18737	0.0192308	12.4251	3.24816	0.0774878	0.218614	0.180094	DHRS3	1
GO:0140296	general transcription initiation factor binding	1/29	53/18737	0.0188679	12.1906	3.21204	0.0789196	0.218614	0.180094	MTOR	1
GO:0050661	NADP binding	1/29	54/18737	0.0185185	11.9649	3.17688	0.0803493	0.218614	0.180094	MTHFR	1
GO:0051020	GTPase binding	2/29	316/18737	0.00632911	4.08926	2.18055	0.0854678	0.218614	0.180094	ENO1/RCC2	2
GO:0008408	3'-5' exonuclease activity	1/29	58/18737	0.0172414	11.1397	3.045	0.0860464	0.218614	0.180094	EXOSC10	1
GO:0031593	polyubiquitin modification-dependent protein binding	1/29	58/18737	0.0172414	11.1397	3.045	0.0860464	0.218614	0.180094	FAAP20	1
GO:0016796	exonuclease activity, active with either ribo- or deoxyribonucleic acids and producing 5'-phosphomonoesters	1/29	60/18737	0.0166667	10.7684	2.98379	0.0888822	0.218614	0.180094	EXOSC10	1
GO:0016765	transferase activity, transferring alkyl or aryl (other than methyl) groups	1/29	61/18737	0.0163934	10.5919	2.95427	0.0902969	0.218614	0.180094	UBIAD1	1
GO:0016836	hydro-lyase activity	1/29	61/18737	0.0163934	10.5919	2.95427	0.0902969	0.218614	0.180094	ENO1	1
GO:0019905	syntaxin binding	1/29	61/18737	0.0163934	10.5919	2.95427	0.0902969	0.218614	0.180094	VAMP3	1
GO:0045296	cadherin binding	2/29	334/18737	0.00598802	3.86888	2.08289	0.0939058	0.223431	0.184062	ENO1/EFHD2	2
GO:0001618	virus receptor activity	1/29	79/18737	0.0126582	8.17852	2.51733	0.115402	0.251756	0.207396	TNFRSF4	1
GO:0016835	carbon-oxygen lyase activity	1/29	79/18737	0.0126582	8.17852	2.51733	0.115402	0.251756	0.207396	ENO1	1
GO:0033293	monocarboxylic acid binding	1/29	79/18737	0.0126582	8.17852	2.51733	0.115402	0.251756	0.207396	RBP7	1
GO:0046332	SMAD binding	1/29	79/18737	0.0126582	8.17852	2.51733	0.115402	0.251756	0.207396	SKI	1
GO:0140272	exogenous protein binding	1/29	80/18737	0.0125	8.07629	2.4972	0.116777	0.251756	0.207396	TNFRSF4	1
GO:0005254	chloride channel activity	1/29	82/18737	0.0121951	7.87931	2.45798	0.11952	0.251756	0.207396	CLCN6	1
GO:0004527	exonuclease activity	1/29	84/18737	0.0119048	7.69171	2.42006	0.122256	0.251756	0.207396	EXOSC10	1
GO:0016209	antioxidant activity	1/29	86/18737	0.0116279	7.51283	2.38337	0.124983	0.251756	0.207396	UBIAD1	1
GO:0050660	flavin adenine dinucleotide binding	1/29	86/18737	0.0116279	7.51283	2.38337	0.124983	0.251756	0.207396	MTHFR	1
GO:0140098	catalytic activity, acting on RNA	2/29	397/18737	0.00503778	3.25493	1.78794	0.125178	0.251756	0.207396	LRRC47/EXOSC10	2
GO:0003727	single-stranded RNA binding	1/29	87/18737	0.0114943	7.42648	2.36547	0.126344	0.251756	0.207396	EXOSC10	1
GO:0072341	modified amino acid binding	1/29	88/18737	0.0113636	7.34208	2.34784	0.127702	0.251756	0.207396	MTHFR	1
GO:0043178	alcohol binding	1/29	91/18737	0.010989	7.10004	2.29659	0.131765	0.256107	0.210981	RBP7	1
GO:0051219	phosphoprotein binding	1/29	93/18737	0.0107527	6.94735	2.2637	0.134464	0.257723	0.212312	MTOR	1
GO:0043130	ubiquitin binding	1/29	100/18737	0.01	6.46103	2.15581	0.143846	0.271928	0.224014	FAAP20	1
GO:0005253	monoatomic anion channel activity	1/29	102/18737	0.00980392	6.33435	2.12687	0.146508	0.272327	0.224343	CLCN6	1
GO:0000149	SNARE binding	1/29	107/18737	0.00934579	6.03835	2.05777	0.153129	0.272327	0.224343	VAMP3	1
GO:0004842	ubiquitin-protein transferase activity	2/29	452/18737	0.00442478	2.85886	1.57505	0.154263	0.272327	0.224343	KLHL21/FBXO6	2
GO:0043022	ribosome binding	1/29	110/18737	0.00909091	5.87367	2.01839	0.157078	0.272327	0.224343	MTOR	1
GO:0009055	electron transfer activity	1/29	116/18737	0.00862069	5.56986	1.94381	0.164923	0.272327	0.224343	DHRS3	1
GO:1990756	ubiquitin-like ligase-substrate adaptor activity	1/29	119/18737	0.00840336	5.42944	1.90844	0.168818	0.272327	0.224343	KLHL21	1
GO:0001228	DNA-binding transcription activator activity, RNA polymerase II-specific	2/29	480/18737	0.00416667	2.6921	1.47861	0.16956	0.272327	0.224343	CASZ1/ZBTB17	2
GO:0015108	chloride transmembrane transporter activity	1/29	120/18737	0.00833333	5.3842	1.89692	0.170113	0.272327	0.224343	CLCN6	1
GO:0032182	ubiquitin-like protein binding	1/29	120/18737	0.00833333	5.3842	1.89692	0.170113	0.272327	0.224343	FAAP20	1
GO:0019787	ubiquitin-like protein transferase activity	2/29	482/18737	0.00414938	2.68093	1.47199	0.170663	0.272327	0.224343	KLHL21/FBXO6	2
GO:0004540	RNA nuclease activity	1/29	121/18737	0.00826446	5.3397	1.88553	0.171406	0.272327	0.224343	EXOSC10	1
GO:0016616	oxidoreductase activity, acting on the CH-OH group of donors, NAD or NADP as acceptor	1/29	122/18737	0.00819672	5.29593	1.87426	0.172697	0.272327	0.224343	DHRS3	1
GO:0001216	DNA-binding transcription activator activity	2/29	487/18737	0.00410678	2.6534	1.45558	0.173427	0.272327	0.224343	CASZ1/ZBTB17	2
GO:0140297	DNA-binding transcription factor binding	2/29	488/18737	0.00409836	2.64796	1.45232	0.173981	0.272327	0.224343	SKI/ZBTB17	2
GO:0030695	GTPase regulator activity	2/29	491/18737	0.00407332	2.63179	1.44259	0.175644	0.272327	0.224343	PLEKHG5/RCC2	2
GO:0060589	nucleoside-triphosphatase regulator activity	2/29	491/18737	0.00407332	2.63179	1.44259	0.175644	0.272327	0.224343	PLEKHG5/RCC2	2
GO:0008528	G protein-coupled peptide receptor activity	1/29	126/18737	0.00793651	5.12781	1.83039	0.17784	0.272327	0.224343	AGTRAP	1
GO:0016755	aminoacyltransferase activity	2/29	499/18737	0.00400802	2.58959	1.417	0.180092	0.272327	0.224343	KLHL21/FBXO6	2
GO:0001653	peptide receptor activity	1/29	132/18737	0.00757576	4.89472	1.76796	0.185498	0.272327	0.224343	AGTRAP	1
GO:0016614	oxidoreductase activity, acting on CH-OH group of donors	1/29	132/18737	0.00757576	4.89472	1.76796	0.185498	0.272327	0.224343	DHRS3	1
GO:0140767	enzyme-substrate adaptor activity	1/29	132/18737	0.00757576	4.89472	1.76796	0.185498	0.272327	0.224343	KLHL21	1
GO:0015297	antiporter activity	1/29	136/18737	0.00735294	4.75076	1.7284	0.190565	0.276821	0.228045	CLCN6	1
GO:0140101	catalytic activity, acting on a tRNA	1/29	139/18737	0.00719424	4.64823	1.69973	0.194345	0.279371	0.230146	LRRC47	1
GO:0008509	monoatomic anion transmembrane transporter activity	1/29	148/18737	0.00675676	4.36556	1.61839	0.205584	0.29248	0.240945	CLCN6	1
GO:0019842	vitamin binding	1/29	150/18737	0.00666667	4.30736	1.6012	0.208061	0.292983	0.241359	RBP7	1
GO:0005244	voltage-gated monoatomic ion channel activity	1/29	164/18737	0.00609756	3.93966	1.48868	0.225191	0.309573	0.255025	CLCN6	1
GO:0015103	inorganic anion transmembrane transporter activity	1/29	166/18737	0.0060241	3.89219	1.47362	0.227608	0.309573	0.255025	CLCN6	1
GO:0022832	voltage-gated channel activity	1/29	166/18737	0.0060241	3.89219	1.47362	0.227608	0.309573	0.255025	CLCN6	1
GO:0016874	ligase activity	1/29	167/18737	0.00598802	3.86888	1.46619	0.228815	0.309573	0.255025	LRRC47	1
GO:0043021	ribonucleoprotein complex binding	1/29	174/18737	0.00574713	3.71324	1.41567	0.237207	0.317811	0.261812	MTOR	1
GO:0031406	carboxylic acid binding	1/29	187/18737	0.00534759	3.4551	1.32844	0.252559	0.33347	0.274713	RBP7	1
GO:0140030	modification-dependent protein binding	1/29	188/18737	0.00531915	3.43672	1.32205	0.253728	0.33347	0.274713	FAAP20	1
GO:0052689	carboxylic ester hydrolase activity	1/29	195/18737	0.00512821	3.31335	1.27851	0.261858	0.340909	0.280841	ACOT7	1
GO:0043177	organic acid binding	1/29	199/18737	0.00502513	3.24675	1.25451	0.266465	0.343414	0.282904	RBP7	1
GO:0016829	lyase activity	1/29	201/18737	0.00497512	3.21445	1.24274	0.268759	0.343414	0.282904	ENO1	1
GO:0003714	transcription corepressor activity	1/29	205/18737	0.00487805	3.15172	1.21962	0.273324	0.344324	0.283654	ENO1	1
GO:0005516	calmodulin binding	1/29	206/18737	0.00485437	3.13642	1.21394	0.274462	0.344324	0.283654	TPRG1L	1
GO:0004518	nuclease activity	1/29	210/18737	0.0047619	3.07668	1.19152	0.278993	0.346856	0.28574	EXOSC10	1
GO:0000287	magnesium ion binding	1/29	231/18737	0.004329	2.79698	1.08198	0.302338	0.372524	0.306885	ENO1	1
GO:0019887	protein kinase regulator activity	1/29	243/18737	0.00411523	2.65886	1.02476	0.315349	0.378982	0.312205	CCNL2	1
GO:0033218	amide binding	1/29	244/18737	0.00409836	2.64796	1.02015	0.316422	0.378982	0.312205	ACOT7	1
GO:0044024	histone H2AS1 kinase activity	1/29	246/18737	0.00406504	2.62644	1.01099	0.318565	0.378982	0.312205	MTOR	1
GO:0140995	histone H2A kinase activity	1/29	246/18737	0.00406504	2.62644	1.01099	0.318565	0.378982	0.312205	MTOR	1
GO:0035173	histone kinase activity	1/29	256/18737	0.00390625	2.52384	0.966542	0.329179	0.388263	0.31985	MTOR	1
GO:0016791	phosphatase activity	1/29	273/18737	0.003663	2.36668	0.895589	0.346859	0.400434	0.329877	PANK4	1
GO:0019207	kinase regulator activity	1/29	273/18737	0.003663	2.36668	0.895589	0.346859	0.400434	0.329877	CCNL2	1
GO:1901681	sulfur compound binding	1/29	277/18737	0.00361011	2.3325	0.879663	0.350953	0.400434	0.329877	ACOT7	1
GO:0008017	microtubule binding	1/29	280/18737	0.00357143	2.30751	0.867897	0.354007	0.400434	0.329877	RCC2	1
GO:0030246	carbohydrate binding	1/29	280/18737	0.00357143	2.30751	0.867897	0.354007	0.400434	0.329877	FBXO6	1
GO:0031267	small GTPase binding	1/29	284/18737	0.00352113	2.27501	0.85244	0.358058	0.401724	0.330939	RCC2	1
GO:0015291	secondary active transmembrane transporter activity	1/29	288/18737	0.00347222	2.24341	0.837239	0.362084	0.402965	0.331962	CLCN6	1
GO:0031625	ubiquitin protein ligase binding	1/29	301/18737	0.00332226	2.14652	0.789508	0.375002	0.414002	0.341054	SKI	1
GO:0022836	gated channel activity	1/29	308/18737	0.00324675	2.09774	0.764799	0.381852	0.418219	0.344528	CLCN6	1
GO:0044389	ubiquitin-like protein ligase binding	1/29	321/18737	0.00311526	2.01278	0.720602	0.394383	0.428542	0.353032	SKI	1
GO:0061630	ubiquitin protein ligase activity	1/29	355/18737	0.0028169	1.82001	0.61413	0.426007	0.459289	0.378362	FBXO6	1
GO:0042578	phosphoric ester hydrolase activity	1/29	363/18737	0.00275482	1.7799	0.590764	0.433213	0.459872	0.378842	PANK4	1
GO:0106310	protein serine kinase activity	1/29	363/18737	0.00275482	1.7799	0.590764	0.433213	0.459872	0.378842	MTOR	1
GO:0061659	ubiquitin-like protein ligase activity	1/29	374/18737	0.0026738	1.72755	0.559565	0.442979	0.466649	0.384425	FBXO6	1
GO:0015631	tubulin binding	1/29	392/18737	0.00255102	1.64822	0.510661	0.458609	0.479455	0.394974	RCC2	1
GO:0004857	enzyme inhibitor activity	1/29	410/18737	0.00243902	1.57586	0.464182	0.473816	0.491629	0.405003	SKI	1
GO:0016887	ATP hydrolysis activity	1/29	418/18737	0.00239234	1.5457	0.444239	0.480441	0.494783	0.407602	ATAD3B	1
GO:0004674	protein serine/threonine kinase activity	1/29	429/18737	0.002331	1.50607	0.417485	0.48942	0.500296	0.412143	MTOR	1
GO:0140993	histone modifying activity	1/29	438/18737	0.00228311	1.47512	0.396143	0.496654	0.501083	0.412792	MTOR	1
GO:0005216	monoatomic ion channel activity	1/29	439/18737	0.0022779	1.47176	0.393801	0.497452	0.501083	0.412792	CLCN6	1
GO:0022804	active transmembrane transporter activity	1/29	458/18737	0.00218341	1.41071	0.350358	0.512378	0.512378	0.422097	CLCN6	1
