# Supplementary material
Source: Research Square preprint supplement (doi:10.21203/rs.3.rs-9392286/v1)
Supplement: Supplementary file 20 [file eedf78d1bb20086d486993e8.xlsx]

## Sheet: Table S12(test_features_Matrix)
Table S12: Feature matrix for model validation(Testing set）
sample	Endothelial_cells__NOC2L	Endothelial_cells__HES4	Endothelial_cells__ISG15	Endothelial_cells__AGRN	Endothelial_cells__TNFRSF4	Endothelial_cells__SDF4	Endothelial_cells__B3GALT6	Endothelial_cells__UBE2J2	Endothelial_cells__ACAP3	Endothelial_cells__PUSL1	Endothelial_cells__CPTP	Endothelial_cells__DVL1	Endothelial_cells__MXRA8	Endothelial_cells__AURKAIP1	Endothelial_cells__CCNL2	Endothelial_cells__ATAD3B	Endothelial_cells__ATAD3A	Endothelial_cells__SSU72	Endothelial_cells__MIB2	Endothelial_cells__CDK11B	Endothelial_cells__SLC35E2B	Endothelial_cells__CDK11A	Endothelial_cells__NADK	Endothelial_cells__GNB1	Endothelial_cells__PRKCZ	Endothelial_cells__FAAP20	Endothelial_cells__SKI	Endothelial_cells__RER1	Endothelial_cells__PEX10	Endothelial_cells__PANK4	Endothelial_cells__TNFRSF14	Endothelial_cells__MEGF6	Endothelial_cells__TPRG1L	Endothelial_cells__WRAP73	Endothelial_cells__LRRC47	Endothelial_cells__CEP104	Endothelial_cells__C1ORF174	Endothelial_cells__ICMT	Endothelial_cells__ACOT7	Endothelial_cells__TNFRSF25	Endothelial_cells__PLEKHG5	Endothelial_cells__NOL9	Endothelial_cells__ZBTB48	Endothelial_cells__KLHL21	Endothelial_cells__PHF13	Endothelial_cells__THAP3	Endothelial_cells__DNAJC11	Endothelial_cells__CAMTA1	Endothelial_cells__VAMP3
GSM3891623	-0.101053	-0.927244	-0.959733	-1.16465	-0.154577	-1.87167	-0.947486	-0.845208	0.0724936772404396	-1.01168	0.474536280540159	0.193579547000717	-1.34975	-2.15424	0.587197919800671	-1.39809	-1.22857	-1.36362	-0.713235	2.04402177312097	0.251709203984661	1.38870529542859	-2.16506	0.0195559242431553	-1.91487	-1.13723	0.428445224802681	-0.341654	-0.452858	1.04360898702874	-0.210319	-1.30778	0.329827195897431	-0.436154	0.696973674691185	0.548747312599656	-1.30222	-1.72331	-2.09165	-0.977405	-0.21088	1.05801149951872	0.55396392112257	-2.04596	0.538596309334456	-0.0225872	0.964969881368264	-0.774588	1.6873539178326
GSM3891625	0.406166908369935	-2.75228	-1.59981	0.0151710475286086	-0.196341	0.17735780853443	0.0761370397698898	0.661560432646907	0.333944203121476	-0.29196	1.02208319517816	0.334895914606965	-3.67117	-0.820378	0.296442006987035	-1.42465	-0.108747	-0.352451	-2.4835	1.40616541414521	0.0243853635170807	0.916003229081708	-0.58385	-0.307169	-1.71133	-0.469619	0.599509635670345	0.793124216164899	0.191060826576396	0.792786327061881	-0.894808	-1.1967	0.121930602275462	0.300794099749098	1.05343226131884	-0.0958527	-0.622315	-1.13197	-0.455318	-0.796821	0.730809905880433	0.690973528725185	0.376722715820718	-1.16379	-1.43272	0.067109816089479	0.366805921226312	0.574292285720287	1.96780876384566
GSM3891627	1.2449632039655	-1.52105	-2.00066	-0.294787	-0.0779973	0.127007160762788	-0.577182	-0.16818	0.904364620984286	0.269516926417815	0.767391571434137	0.220824751303159	-1.91918	-1.10758	-0.0279101	-0.157949	0.369072154927322	-0.979773	-1.07102	1.32433444906762	-1.25939	0.94442096422843	-0.616649	-0.035327	-1.60873	0.39813754528608	1.11384673944997	0.408537457366919	-0.130305	0.224904253088561	-1.43559	-2.1186	-0.241497	-0.81943	0.441951511017562	0.379963913667521	-1.16503	-0.158648	0.301218955697392	-0.65577	3.40461589600815	1.43633406981393	-0.110752	0.141807733489697	-0.117223	-0.675489	0.560853571394192	-0.292647	0.655880026880292
GSM3891629	0.261792724975855	0.206682025921604	-1.47548	0.635029440601178	0.788701896834088	-0.812544	1.50114307915693	-0.113112	0.116401003868431	-1.13664	0.259936855145765	0.784459068971265	-3.75048	-1.90655	0.250990138718203	-0.0725643	-0.204337	-1.74885	-0.570441	2.15845413723118	0.146731656975864	1.2237526414322	-0.450101	-0.319049	-2.33564	-0.320887	0.748461189312423	-0.250023	-0.338759	-0.243177	-1.26283	-0.58766	-0.731613	-0.887486	0.371890769480078	0.357989223802743	-0.305073	-1.2896	-0.219736	-0.878336	1.13551720447583	1.2085476312719	-0.194086	-0.303469	-1.08505	-0.840531	-0.228514	-0.402134	1.2441123329201
GSM3891631	0.555390194985502	-0.223959	0.519999519972764	0.638594769620232	0.59814712808799	-0.887733	0.563759894718179	-0.479019	0.106278146044534	-0.325129	0.656713169329536	0.203451152366494	-0.858275	-0.832525	-0.166798	-0.576513	-0.307526	0.297583304741022	0.281364672919036	1.40140312002251	-0.929931	1.40097834877168	-0.655028	-0.440331	-1.76502	0.274869366568389	0.919718658103801	0.107445537624617	0.00208516655639469	-1.31832	-0.58644	-0.875179	0.0473944803663299	-0.555272	0.0752673626639615	-0.0737855	-0.269318	-1.35877	0.479570687615758	-0.242019	1.37825789197257	0.116672253945923	0.198879422349846	-0.54766	0.00685307298886427	0.321220676520797	0.181728745730015	0.166782052163144	0.848181987193741
[truncated: 5,000 more columns]

## Sheet: TableS12(test_gene_feature)
Table S12: Gene feature(Testing set)
Feature	Test_AUC	Direction	Wilcox_p	FDR_BH	NonmissRate	celltype	gene
Endothelial_cells__TNFRSF4	1	1	0.2	0.567216062331435	1	Endothelial_cells	TNFRSF4
Endothelial_cells__CCNL2	1	1	0.2	0.567216062331435	1	Endothelial_cells	CCNL2
Endothelial_cells__ATAD3B	1	1	0.2	0.567216062331435	1	Endothelial_cells	ATAD3B
Endothelial_cells__FAAP20	1	1	0.2	0.567216062331435	1	Endothelial_cells	FAAP20
Endothelial_cells__SKI	1	1	0.2	0.567216062331435	1	Endothelial_cells	SKI
Endothelial_cells__PANK4	1	1	0.2	0.567216062331435	1	Endothelial_cells	PANK4
Endothelial_cells__TPRG1L	1	1	0.2	0.567216062331435	1	Endothelial_cells	TPRG1L
Endothelial_cells__WRAP73	1	1	0.2	0.567216062331435	1	Endothelial_cells	WRAP73
Endothelial_cells__LRRC47	1	1	0.2	0.567216062331435	1	Endothelial_cells	LRRC47
Endothelial_cells__ACOT7	1	1	0.2	0.567216062331435	1	Endothelial_cells	ACOT7
Endothelial_cells__PLEKHG5	1	1	0.2	0.567216062331435	1	Endothelial_cells	PLEKHG5
Endothelial_cells__ZBTB48	1	1	0.2	0.567216062331435	1	Endothelial_cells	ZBTB48
Endothelial_cells__KLHL21	1	1	0.2	0.567216062331435	1	Endothelial_cells	KLHL21
Endothelial_cells__VAMP3	1	1	0.2	0.567216062331435	1	Endothelial_cells	VAMP3
Endothelial_cells__ENO1	1	1	0.2	0.567216062331435	1	Endothelial_cells	ENO1
Endothelial_cells__RBP7	1	1	0.2	0.567216062331435	1	Endothelial_cells	RBP7
Endothelial_cells__CASZ1	1	1	0.2	0.567216062331435	1	Endothelial_cells	CASZ1
Endothelial_cells__EXOSC10	1	1	0.2	0.567216062331435	1	Endothelial_cells	EXOSC10
Endothelial_cells__MTOR	1	1	0.2	0.567216062331435	1	Endothelial_cells	MTOR
Endothelial_cells__UBIAD1	1	1	0.2	0.567216062331435	1	Endothelial_cells	UBIAD1
Endothelial_cells__FBXO6	1	1	0.2	0.567216062331435	1	Endothelial_cells	FBXO6
Endothelial_cells__AGTRAP	1	1	0.2	0.567216062331435	1	Endothelial_cells	AGTRAP
Endothelial_cells__MTHFR	1	1	0.2	0.567216062331435	1	Endothelial_cells	MTHFR
Endothelial_cells__CLCN6	1	1	0.2	0.567216062331435	1	Endothelial_cells	CLCN6
Endothelial_cells__DHRS3	1	1	0.2	0.567216062331435	1	Endothelial_cells	DHRS3
Endothelial_cells__TMEM51	1	1	0.2	0.567216062331435	1	Endothelial_cells	TMEM51
Endothelial_cells__EFHD2	1	1	0.2	0.567216062331435	1	Endothelial_cells	EFHD2
Endothelial_cells__DNAJC16	1	1	0.2	0.567216062331435	1	Endothelial_cells	DNAJC16
Endothelial_cells__ZBTB17	1	1	0.2	0.567216062331435	1	Endothelial_cells	ZBTB17
Endothelial_cells__RCC2	1	1	0.2	0.567216062331435	1	Endothelial_cells	RCC2
Endothelial_cells__IFFO2	1	1	0.2	0.567216062331435	1	Endothelial_cells	IFFO2
Endothelial_cells__AKR7A2	1	1	0.2	0.567216062331435	1	Endothelial_cells	AKR7A2
Endothelial_cells__MUL1	1	1	0.2	0.567216062331435	1	Endothelial_cells	MUL1
Endothelial_cells__CDA	1	1	0.2	0.567216062331435	1	Endothelial_cells	CDA
Endothelial_cells__ECE1	1	1	0.2	0.567216062331435	1	Endothelial_cells	ECE1
Endothelial_cells__HSPG2	1	1	0.2	0.567216062331435	1	Endothelial_cells	HSPG2
Endothelial_cells__ZNF436	1	1	0.2	0.567216062331435	1	Endothelial_cells	ZNF436
Endothelial_cells__TCEA3	1	1	0.2	0.567216062331435	1	Endothelial_cells	TCEA3
Endothelial_cells__ID3	1	1	0.2	0.567216062331435	1	Endothelial_cells	ID3
Endothelial_cells__LYPLA2	1	1	0.2	0.567216062331435	1	Endothelial_cells	LYPLA2
Endothelial_cells__GALE	1	1	0.2	0.567216062331435	1	Endothelial_cells	GALE
Endothelial_cells__HMGCL	1	1	0.2	0.567216062331435	1	Endothelial_cells	HMGCL
Endothelial_cells__PNRC2	1	1	0.2	0.567216062331435	1	Endothelial_cells	PNRC2
Endothelial_cells__SRSF10	1	1	0.2	0.567216062331435	1	Endothelial_cells	SRSF10
Endothelial_cells__RSRP1	1	1	0.2	0.567216062331435	1	Endothelial_cells	RSRP1
Endothelial_cells__TMEM50A	1	1	0.2	0.567216062331435	1	Endothelial_cells	TMEM50A
Endothelial_cells__LDLRAP1	1	1	0.2	0.567216062331435	1	Endothelial_cells	LDLRAP1
Endothelial_cells__MAN1C1	1	1	0.2	0.567216062331435	1	Endothelial_cells	MAN1C1
Endothelial_cells__STMN1	1	1	0.2	0.567216062331435	1	Endothelial_cells	STMN1
Endothelial_cells__ZNF593	1	1	0.2	0.567216062331435	1	Endothelial_cells	ZNF593
Endothelial_cells__UBXN11	1	1	0.2	0.567216062331435	1	Endothelial_cells	UBXN11
Endothelial_cells__WDTC1	1	1	0.2	0.567216062331435	1	Endothelial_cells	WDTC1
Endothelial_cells__TMEM222	1	1	0.2	0.567216062331435	1	Endothelial_cells	TMEM222
Endothelial_cells__MAP3K6	1	1	0.2	0.567216062331435	1	Endothelial_cells	MAP3K6
Endothelial_cells__WASF2	1	1	0.2	0.567216062331435	1	Endothelial_cells	WASF2
Endothelial_cells__FGR	1	1	0.2	0.567216062331435	1	Endothelial_cells	FGR
Endothelial_cells__STX12	1	1	0.2	0.567216062331435	1	Endothelial_cells	STX12
Endothelial_cells__EYA3	1	1	0.2	0.567216062331435	1	Endothelial_cells	EYA3
Endothelial_cells__SESN2	1	1	0.2	0.567216062331435	1	Endothelial_cells	SESN2
Endothelial_cells__RCC1	1	1	0.2	0.567216062331435	1	Endothelial_cells	RCC1
Endothelial_cells__TAF12	1	1	0.2	0.567216062331435	1	Endothelial_cells	TAF12
Endothelial_cells__YTHDF2	1	1	0.2	0.567216062331435	1	Endothelial_cells	YTHDF2
Endothelial_cells__SDC3	1	1	0.2	0.567216062331435	1	Endothelial_cells	SDC3
Endothelial_cells__MARCKSL1	1	1	0.2	0.567216062331435	1	Endothelial_cells	MARCKSL1
Endothelial_cells__ZBTB8OS	1	1	0.2	0.567216062331435	1	Endothelial_cells	ZBTB8OS
Endothelial_cells__SYNC	1	1	0.2	0.567216062331435	1	Endothelial_cells	SYNC
Endothelial_cells__RNF19B	1	1	0.2	0.567216062331435	1	Endothelial_cells	RNF19B
Endothelial_cells__ZNF362	1	1	0.2	0.567216062331435	1	Endothelial_cells	ZNF362
Endothelial_cells__ZMYM6	1	1	0.2	0.567216062331435	1	Endothelial_cells	ZMYM6
Endothelial_cells__SFPQ	1	1	0.2	0.567216062331435	1	Endothelial_cells	SFPQ
Endothelial_cells__KIAA0319L	1	1	0.2	0.567216062331435	1	Endothelial_cells	KIAA0319L
Endothelial_cells__AGO4	1	1	0.2	0.567216062331435	1	Endothelial_cells	AGO4
Endothelial_cells__ADPRHL2	1	1	0.2	0.567216062331435	1	Endothelial_cells	ADPRHL2
Endothelial_cells__GNL2	1	1	0.2	0.567216062331435	1	Endothelial_cells	GNL2
Endothelial_cells__C1ORF122	1	1	0.2	0.567216062331435	1	Endothelial_cells	C1ORF122
Endothelial_cells__MTF1	1	1	0.2	0.567216062331435	1	Endothelial_cells	MTF1
Endothelial_cells__SF3A3	1	1	0.2	0.567216062331435	1	Endothelial_cells	SF3A3
Endothelial_cells__FHL3	1	1	0.2	0.567216062331435	1	Endothelial_cells	FHL3
Endothelial_cells__NDUFS5	1	1	0.2	0.567216062331435	1	Endothelial_cells	NDUFS5
Endothelial_cells__PABPC4	1	1	0.2	0.567216062331435	1	Endothelial_cells	PABPC4
Endothelial_cells__NFYC	1	1	0.2	0.567216062331435	1	Endothelial_cells	NFYC
Endothelial_cells__SCMH1	1	1	0.2	0.567216062331435	1	Endothelial_cells	SCMH1
Endothelial_cells__HIVEP3	1	1	0.2	0.567216062331435	1	Endothelial_cells	HIVEP3
Endothelial_cells__FOXJ3	1	1	0.2	0.567216062331435	1	Endothelial_cells	FOXJ3
Endothelial_cells__YBX1	1	1	0.2	0.567216062331435	1	Endothelial_cells	YBX1
Endothelial_cells__SLC2A1	1	1	0.2	0.567216062331435	1	Endothelial_cells	SLC2A1
Endothelial_cells__ST3GAL3	1	1	0.2	0.567216062331435	1	Endothelial_cells	ST3GAL3
Endothelial_cells__ATP6V0B	1	1	0.2	0.567216062331435	1	Endothelial_cells	ATP6V0B
Endothelial_cells__RNF220	1	1	0.2	0.567216062331435	1	Endothelial_cells	RNF220
Endothelial_cells__AKR1A1	1	1	0.2	0.567216062331435	1	Endothelial_cells	AKR1A1
Endothelial_cells__GPBP1L1	1	1	0.2	0.567216062331435	1	Endothelial_cells	GPBP1L1
Endothelial_cells__IPP	1	1	0.2	0.567216062331435	1	Endothelial_cells	IPP
Endothelial_cells__POMGNT1	1	1	0.2	0.567216062331435	1	Endothelial_cells	POMGNT1
Endothelial_cells__UQCRH	1	1	0.2	0.567216062331435	1	Endothelial_cells	UQCRH
Endothelial_cells__TAL1	1	1	0.2	0.567216062331435	1	Endothelial_cells	TAL1
Endothelial_cells__CMPK1	1	1	0.2	0.567216062331435	1	Endothelial_cells	CMPK1
Endothelial_cells__RNF11	1	1	0.2	0.567216062331435	1	Endothelial_cells	RNF11
Endothelial_cells__TXNDC12	1	1	0.2	0.567216062331435	1	Endothelial_cells	TXNDC12
Endothelial_cells__CC2D1B	1	1	0.2	0.567216062331435	1	Endothelial_cells	CC2D1B
Endothelial_cells__PRPF38A	1	1	0.2	0.567216062331435	1	Endothelial_cells	PRPF38A
Endothelial_cells__ECHDC2	1	1	0.2	0.567216062331435	1	Endothelial_cells	ECHDC2
Endothelial_cells__CPT2	1	1	0.2	0.567216062331435	1	Endothelial_cells	CPT2
Endothelial_cells__YIPF1	1	1	0.2	0.567216062331435	1	Endothelial_cells	YIPF1
Endothelial_cells__TMEM59	1	1	0.2	0.567216062331435	1	Endothelial_cells	TMEM59
Endothelial_cells__SSBP3	1	1	0.2	0.567216062331435	1	Endothelial_cells	SSBP3
Endothelial_cells__PLPP3	1	1	0.2	0.567216062331435	1	Endothelial_cells	PLPP3
Endothelial_cells__USP1	1	1	0.2	0.567216062331435	1	Endothelial_cells	USP1
Endothelial_cells__ATG4C	1	1	0.2	0.567216062331435	1	Endothelial_cells	ATG4C
Endothelial_cells__PGM1	1	1	0.2	0.567216062331435	1	Endothelial_cells	PGM1
Endothelial_cells__CACHD1	1	1	0.2	0.567216062331435	1	Endothelial_cells	CACHD1
Endothelial_cells__AK4	1	1	0.2	0.567216062331435	1	Endothelial_cells	AK4
Endothelial_cells__LEPR	1	1	0.2	0.567216062331435	1	Endothelial_cells	LEPR
Endothelial_cells__SERBP1	1	1	0.2	0.567216062331435	1	Endothelial_cells	SERBP1
Endothelial_cells__GADD45A	1	1	0.2	0.567216062331435	1	Endothelial_cells	GADD45A
Endothelial_cells__WLS	1	1	0.2	0.567216062331435	1	Endothelial_cells	WLS
Endothelial_cells__FPGT	1	1	0.2	0.567216062331435	1	Endothelial_cells	FPGT
Endothelial_cells__ST6GALNAC3	1	1	0.2	0.567216062331435	1	Endothelial_cells	ST6GALNAC3
Endothelial_cells__PIGK	1	1	0.2	0.567216062331435	1	Endothelial_cells	PIGK
Endothelial_cells__RPF1	1	1	0.2	0.567216062331435	1	Endothelial_cells	RPF1
Endothelial_cells__CTBS	1	1	0.2	0.567216062331435	1	Endothelial_cells	CTBS
Endothelial_cells__C1ORF52	1	1	0.2	0.567216062331435	1	Endothelial_cells	C1ORF52
Endothelial_cells__BCL10	1	1	0.2	0.567216062331435	1	Endothelial_cells	BCL10
Endothelial_cells__ZNHIT6	1	1	0.2	0.567216062331435	1	Endothelial_cells	ZNHIT6
Endothelial_cells__ODF2L	1	1	0.2	0.567216062331435	1	Endothelial_cells	ODF2L
Endothelial_cells__SH3GLB1	1	1	0.2	0.567216062331435	1	Endothelial_cells	SH3GLB1
Endothelial_cells__GBP1	1	1	0.2	0.567216062331435	1	Endothelial_cells	GBP1
Endothelial_cells__GBP4	1	1	0.2	0.567216062331435	1	Endothelial_cells	GBP4
Endothelial_cells__LRRC8C	1	1	0.2	0.567216062331435	1	Endothelial_cells	LRRC8C
Endothelial_cells__ZNF326	1	1	0.2	0.567216062331435	1	Endothelial_cells	ZNF326
Endothelial_cells__ZNF644	1	1	0.2	0.567216062331435	1	Endothelial_cells	ZNF644
Endothelial_cells__EVI5	1	1	0.2	0.567216062331435	1	Endothelial_cells	EVI5
Endothelial_cells__MTF2	1	1	0.2	0.567216062331435	1	Endothelial_cells	MTF2
Endothelial_cells__ARHGAP29	1	1	0.2	0.567216062331435	1	Endothelial_cells	ARHGAP29
Endothelial_cells__ABCD3	1	1	0.2	0.567216062331435	1	Endothelial_cells	ABCD3
Endothelial_cells__PTBP2	1	1	0.2	0.567216062331435	1	Endothelial_cells	PTBP2
Endothelial_cells__DPYD	1	1	0.2	0.567216062331435	1	Endothelial_cells	DPYD
Endothelial_cells__AGL	1	1	0.2	0.567216062331435	1	Endothelial_cells	AGL
Endothelial_cells__SLC35A3	1	1	0.2	0.567216062331435	1	Endothelial_cells	SLC35A3
Endothelial_cells__SASS6	1	1	0.2	0.567216062331435	1	Endothelial_cells	SASS6
Endothelial_cells__DBT	1	1	0.2	0.567216062331435	1	Endothelial_cells	DBT
Endothelial_cells__CDC14A	1	1	0.2	0.567216062331435	1	Endothelial_cells	CDC14A
Endothelial_cells__VAV3	1	1	0.2	0.567216062331435	1	Endothelial_cells	VAV3
Endothelial_cells__PRPF38B	1	1	0.2	0.567216062331435	1	Endothelial_cells	PRPF38B
Endothelial_cells__TMEM167B	1	1	0.2	0.567216062331435	1	Endothelial_cells	TMEM167B
Endothelial_cells__SARS	1	1	0.2	0.567216062331435	1	Endothelial_cells	SARS
Endothelial_cells__SORT1	1	1	0.2	0.567216062331435	1	Endothelial_cells	SORT1
Endothelial_cells__GNAI3	1	1	0.2	0.567216062331435	1	Endothelial_cells	GNAI3
Endothelial_cells__CSF1	1	1	0.2	0.567216062331435	1	Endothelial_cells	CSF1
Endothelial_cells__KCNC4	1	1	0.2	0.567216062331435	1	Endothelial_cells	KCNC4
Endothelial_cells__CEPT1	1	1	0.2	0.567216062331435	1	Endothelial_cells	CEPT1
Endothelial_cells__WDR77	1	1	0.2	0.567216062331435	1	Endothelial_cells	WDR77
Endothelial_cells__CTTNBP2NL	1	1	0.2	0.567216062331435	1	Endothelial_cells	CTTNBP2NL
Endothelial_cells__WNT2B	1	1	0.2	0.567216062331435	1	Endothelial_cells	WNT2B
Endothelial_cells__MAGI3	1	1	0.2	0.567216062331435	1	Endothelial_cells	MAGI3
Endothelial_cells__AP4B1	1	1	0.2	0.567216062331435	1	Endothelial_cells	AP4B1
Endothelial_cells__CSDE1	1	1	0.2	0.567216062331435	1	Endothelial_cells	CSDE1
Endothelial_cells__SIKE1	1	1	0.2	0.567216062331435	1	Endothelial_cells	SIKE1
Endothelial_cells__VANGL1	1	1	0.2	0.567216062331435	1	Endothelial_cells	VANGL1
Endothelial_cells__ATP1A1	1	1	0.2	0.567216062331435	1	Endothelial_cells	ATP1A1
Endothelial_cells__CD58	1	1	0.2	0.567216062331435	1	Endothelial_cells	CD58
Endothelial_cells__MAN1A2	1	1	0.2	0.567216062331435	1	Endothelial_cells	MAN1A2
Endothelial_cells__GDAP2	1	1	0.2	0.567216062331435	1	Endothelial_cells	GDAP2
Endothelial_cells__WDR3	1	1	0.2	0.567216062331435	1	Endothelial_cells	WDR3
Endothelial_cells__SRGAP2C	1	1	0.2	0.567216062331435	1	Endothelial_cells	SRGAP2C
Endothelial_cells__RNF115	1	1	0.2	0.567216062331435	1	Endothelial_cells	RNF115
Endothelial_cells__PEX11B	1	1	0.2	0.567216062331435	1	Endothelial_cells	PEX11B
Endothelial_cells__LIX1L	1	1	0.2	0.567216062331435	1	Endothelial_cells	LIX1L
Endothelial_cells__TXNIP	1	1	0.2	0.567216062331435	1	Endothelial_cells	TXNIP
Endothelial_cells__NBPF12	1	1	0.2	0.567216062331435	1	Endothelial_cells	NBPF12
Endothelial_cells__PRKAB2	1	1	0.2	0.567216062331435	1	Endothelial_cells	PRKAB2
Endothelial_cells__PLEKHO1	1	1	0.2	0.567216062331435	1	Endothelial_cells	PLEKHO1
Endothelial_cells__C1ORF54	1	1	0.2	0.567216062331435	1	Endothelial_cells	C1ORF54
Endothelial_cells__CERS2	1	1	0.2	0.567216062331435	1	Endothelial_cells	CERS2
Endothelial_cells__ZNF687	1	1	0.2	0.567216062331435	1	Endothelial_cells	ZNF687
Endothelial_cells__RFX5	1	1	0.2	0.567216062331435	1	Endothelial_cells	RFX5
Endothelial_cells__POGZ	1	1	0.2	0.567216062331435	1	Endothelial_cells	POGZ
Endothelial_cells__S100A11	1	1	0.2	0.567216062331435	1	Endothelial_cells	S100A11
Endothelial_cells__SNAPIN	1	1	0.2	0.567216062331435	1	Endothelial_cells	SNAPIN
Endothelial_cells__SLC27A3	1	1	0.2	0.567216062331435	1	Endothelial_cells	SLC27A3
Endothelial_cells__SLC39A1	1	1	0.2	0.567216062331435	1	Endothelial_cells	SLC39A1
Endothelial_cells__CREB3L4	1	1	0.2	0.567216062331435	1	Endothelial_cells	CREB3L4
Endothelial_cells__RAB13	1	1	0.2	0.567216062331435	1	Endothelial_cells	RAB13
Endothelial_cells__UBAP2L	1	1	0.2	0.567216062331435	1	Endothelial_cells	UBAP2L
Endothelial_cells__ATP8B2	1	1	0.2	0.567216062331435	1	Endothelial_cells	ATP8B2
Endothelial_cells__SHC1	1	1	0.2	0.567216062331435	1	Endothelial_cells	SHC1
Endothelial_cells__CKS1B	1	1	0.2	0.567216062331435	1	Endothelial_cells	CKS1B
Endothelial_cells__DPM3	1	1	0.2	0.567216062331435	1	Endothelial_cells	DPM3
Endothelial_cells__GBA	1	1	0.2	0.567216062331435	1	Endothelial_cells	GBA
Endothelial_cells__SCAMP3	1	1	0.2	0.567216062331435	1	Endothelial_cells	SCAMP3
Endothelial_cells__LMNA	1	1	0.2	0.567216062331435	1	Endothelial_cells	LMNA
Endothelial_cells__SEMA4A	1	1	0.2	0.567216062331435	1	Endothelial_cells	SEMA4A
Endothelial_cells__SLC25A44	1	1	0.2	0.567216062331435	1	Endothelial_cells	SLC25A44
Endothelial_cells__GLMP	1	1	0.2	0.567216062331435	1	Endothelial_cells	GLMP
Endothelial_cells__GPATCH4	1	1	0.2	0.567216062331435	1	Endothelial_cells	GPATCH4
Endothelial_cells__ISG20L2	1	1	0.2	0.567216062331435	1	Endothelial_cells	ISG20L2
Endothelial_cells__HDGF	1	1	0.2	0.567216062331435	1	Endothelial_cells	HDGF
Endothelial_cells__PRCC	1	1	0.2	0.567216062331435	1	Endothelial_cells	PRCC
Endothelial_cells__IFI16	1	1	0.2	0.567216062331435	1	Endothelial_cells	IFI16
Endothelial_cells__DUSP23	1	1	0.2	0.567216062331435	1	Endothelial_cells	DUSP23
Endothelial_cells__PEX19	1	1	0.2	0.567216062331435	1	Endothelial_cells	PEX19
Endothelial_cells__F11R	1	1	0.2	0.567216062331435	1	Endothelial_cells	F11R
Endothelial_cells__PFDN2	1	1	0.2	0.567216062331435	1	Endothelial_cells	PFDN2
Endothelial_cells__DEDD	1	1	0.2	0.567216062331435	1	Endothelial_cells	DEDD
Endothelial_cells__UFC1	1	1	0.2	0.567216062331435	1	Endothelial_cells	UFC1
Endothelial_cells__B4GALT3	1	1	0.2	0.567216062331435	1	Endothelial_cells	B4GALT3
Endothelial_cells__UHMK1	1	1	0.2	0.567216062331435	1	Endothelial_cells	UHMK1
Endothelial_cells__PBX1	1	1	0.2	0.567216062331435	1	Endothelial_cells	PBX1
Endothelial_cells__ALDH9A1	1	1	0.2	0.567216062331435	1	Endothelial_cells	ALDH9A1
Endothelial_cells__UCK2	1	1	0.2	0.567216062331435	1	Endothelial_cells	UCK2
Endothelial_cells__POU2F1	1	1	0.2	0.567216062331435	1	Endothelial_cells	POU2F1
Endothelial_cells__RCSD1	1	1	0.2	0.567216062331435	1	Endothelial_cells	RCSD1
Endothelial_cells__MPZL1	1	1	0.2	0.567216062331435	1	Endothelial_cells	MPZL1
Endothelial_cells__DCAF6	1	1	0.2	0.567216062331435	1	Endothelial_cells	DCAF6
Endothelial_cells__TIPRL	1	1	0.2	0.567216062331435	1	Endothelial_cells	TIPRL
Endothelial_cells__BLZF1	1	1	0.2	0.567216062331435	1	Endothelial_cells	BLZF1
Endothelial_cells__SCYL3	1	1	0.2	0.567216062331435	1	Endothelial_cells	SCYL3
Endothelial_cells__PRRC2C	1	1	0.2	0.567216062331435	1	Endothelial_cells	PRRC2C
Endothelial_cells__DNM3	1	1	0.2	0.567216062331435	1	Endothelial_cells	DNM3
Endothelial_cells__PIGC	1	1	0.2	0.567216062331435	1	Endothelial_cells	PIGC
Endothelial_cells__PRDX6	1	1	0.2	0.567216062331435	1	Endothelial_cells	PRDX6
Endothelial_cells__KLHL20	1	1	0.2	0.567216062331435	1	Endothelial_cells	KLHL20
Endothelial_cells__ZBTB37	1	1	0.2	0.567216062331435	1	Endothelial_cells	ZBTB37
Endothelial_cells__RABGAP1L	1	1	0.2	0.567216062331435	1	Endothelial_cells	RABGAP1L
Endothelial_cells__ABL2	1	1	0.2	0.567216062331435	1	Endothelial_cells	ABL2
Endothelial_cells__TOR1AIP2	1	1	0.2	0.567216062331435	1	Endothelial_cells	TOR1AIP2
Endothelial_cells__ACBD6	1	1	0.2	0.567216062331435	1	Endothelial_cells	ACBD6
Endothelial_cells__RGS16	1	1	0.2	0.567216062331435	1	Endothelial_cells	RGS16
Endothelial_cells__LAMC1	1	1	0.2	0.567216062331435	1	Endothelial_cells	LAMC1
Endothelial_cells__RGL1	1	1	0.2	0.567216062331435	1	Endothelial_cells	RGL1
Endothelial_cells__C1ORF21	1	1	0.2	0.567216062331435	1	Endothelial_cells	C1ORF21
Endothelial_cells__TRMT1L	1	1	0.2	0.567216062331435	1	Endothelial_cells	TRMT1L
Endothelial_cells__PTGS2	1	1	0.2	0.567216062331435	1	Endothelial_cells	PTGS2
Endothelial_cells__RGS2	1	1	0.2	0.567216062331435	1	Endothelial_cells	RGS2
Endothelial_cells__GLRX2	1	1	0.2	0.567216062331435	1	Endothelial_cells	GLRX2
Endothelial_cells__CFH	1	1	0.2	0.567216062331435	1	Endothelial_cells	CFH
Endothelial_cells__NEK7	1	1	0.2	0.567216062331435	1	Endothelial_cells	NEK7
Endothelial_cells__DDX59	1	1	0.2	0.567216062331435	1	Endothelial_cells	DDX59
Endothelial_cells__PHLDA3	1	1	0.2	0.567216062331435	1	Endothelial_cells	PHLDA3
Endothelial_cells__KDM5B	1	1	0.2	0.567216062331435	1	Endothelial_cells	KDM5B
Endothelial_cells__KLHL12	1	1	0.2	0.567216062331435	1	Endothelial_cells	KLHL12
Endothelial_cells__SNRPE	1	1	0.2	0.567216062331435	1	Endothelial_cells	SNRPE
Endothelial_cells__SOX13	1	1	0.2	0.567216062331435	1	Endothelial_cells	SOX13
Endothelial_cells__MDM4	1	1	0.2	0.567216062331435	1	Endothelial_cells	MDM4
Endothelial_cells__NUAK2	1	1	0.2	0.567216062331435	1	Endothelial_cells	NUAK2
Endothelial_cells__NUCKS1	1	1	0.2	0.567216062331435	1	Endothelial_cells	NUCKS1
Endothelial_cells__SRGAP2	1	1	0.2	0.567216062331435	1	Endothelial_cells	SRGAP2
Endothelial_cells__EIF2D	1	1	0.2	0.567216062331435	1	Endothelial_cells	EIF2D
Endothelial_cells__DYRK3	1	1	0.2	0.567216062331435	1	Endothelial_cells	DYRK3
Endothelial_cells__MAPKAPK2	1	1	0.2	0.567216062331435	1	Endothelial_cells	MAPKAPK2
Endothelial_cells__CD55	1	1	0.2	0.567216062331435	1	Endothelial_cells	CD55
Endothelial_cells__RCOR3	1	1	0.2	0.567216062331435	1	Endothelial_cells	RCOR3
Endothelial_cells__SLC30A1	1	1	0.2	0.567216062331435	1	Endothelial_cells	SLC30A1
Endothelial_cells__BATF3	1	1	0.2	0.567216062331435	1	Endothelial_cells	BATF3
Endothelial_cells__NSL1	1	1	0.2	0.567216062331435	1	Endothelial_cells	NSL1
Endothelial_cells__KCTD3	1	1	0.2	0.567216062331435	1	Endothelial_cells	KCTD3
Endothelial_cells__RRP15	1	1	0.2	0.567216062331435	1	Endothelial_cells	RRP15
Endothelial_cells__IARS2	1	1	0.2	0.567216062331435	1	Endothelial_cells	IARS2
Endothelial_cells__C1ORF115	1	1	0.2	0.567216062331435	1	Endothelial_cells	C1ORF115
Endothelial_cells__MARC2	1	1	0.2	0.567216062331435	1	Endothelial_cells	MARC2
Endothelial_cells__HLX	1	1	0.2	0.567216062331435	1	Endothelial_cells	HLX
Endothelial_cells__DUSP10	1	1	0.2	0.567216062331435	1	Endothelial_cells	DUSP10
Endothelial_cells__AIDA	1	1	0.2	0.567216062331435	1	Endothelial_cells	AIDA
Endothelial_cells__DISP1	1	1	0.2	0.567216062331435	1	Endothelial_cells	DISP1
Endothelial_cells__CAPN2	1	1	0.2	0.567216062331435	1	Endothelial_cells	CAPN2
Endothelial_cells__SRP9	1	1	0.2	0.567216062331435	1	Endothelial_cells	SRP9
Endothelial_cells__ACBD3	1	1	0.2	0.567216062331435	1	Endothelial_cells	ACBD3
Endothelial_cells__PSEN2	1	1	0.2	0.567216062331435	1	Endothelial_cells	PSEN2
Endothelial_cells__CDC42BPA	1	1	0.2	0.567216062331435	1	Endothelial_cells	CDC42BPA
Endothelial_cells__SNAP47	1	1	0.2	0.567216062331435	1	Endothelial_cells	SNAP47
Endothelial_cells__RHOU	1	1	0.2	0.567216062331435	1	Endothelial_cells	RHOU
Endothelial_cells__RAB4A	1	1	0.2	0.567216062331435	1	Endothelial_cells	RAB4A
Endothelial_cells__EGLN1	1	1	0.2	0.567216062331435	1	Endothelial_cells	EGLN1
Endothelial_cells__DISC1	1	1	0.2	0.567216062331435	1	Endothelial_cells	DISC1
Endothelial_cells__SIPA1L2	1	1	0.2	0.567216062331435	1	Endothelial_cells	SIPA1L2
Endothelial_cells__NTPCR	1	1	0.2	0.567216062331435	1	Endothelial_cells	NTPCR
Endothelial_cells__COA6	1	1	0.2	0.567216062331435	1	Endothelial_cells	COA6
Endothelial_cells__IRF2BP2	1	1	0.2	0.567216062331435	1	Endothelial_cells	IRF2BP2
Endothelial_cells__GGPS1	1	1	0.2	0.567216062331435	1	Endothelial_cells	GGPS1
Endothelial_cells__LYST	1	1	0.2	0.567216062331435	1	Endothelial_cells	LYST
Endothelial_cells__NID1	1	1	0.2	0.567216062331435	1	Endothelial_cells	NID1
Endothelial_cells__HEATR1	1	1	0.2	0.567216062331435	1	Endothelial_cells	HEATR1
Endothelial_cells__AKT3	1	1	0.2	0.567216062331435	1	Endothelial_cells	AKT3
Endothelial_cells__COX20	1	1	0.2	0.567216062331435	1	Endothelial_cells	COX20
Endothelial_cells__EFCAB2	1	1	0.2	0.567216062331435	1	Endothelial_cells	EFCAB2
Endothelial_cells__TFB2M	1	1	0.2	0.567216062331435	1	Endothelial_cells	TFB2M
Endothelial_cells__SCCPDH	1	1	0.2	0.567216062331435	1	Endothelial_cells	SCCPDH
Endothelial_cells__AHCTF1	1	1	0.2	0.567216062331435	1	Endothelial_cells	AHCTF1
Endothelial_cells__ZNF496	1	1	0.2	0.567216062331435	1	Endothelial_cells	ZNF496
Endothelial_cells__SH3YL1	1	1	0.2	0.567216062331435	1	Endothelial_cells	SH3YL1
Endothelial_cells__TMEM18	1	1	0.2	0.567216062331435	1	Endothelial_cells	TMEM18
Endothelial_cells__PXDN	1	1	0.2	0.567216062331435	1	Endothelial_cells	PXDN
Endothelial_cells__ADI1	1	1	0.2	0.567216062331435	1	Endothelial_cells	ADI1
Endothelial_cells__CMPK2	1	1	0.2	0.567216062331435	1	Endothelial_cells	CMPK2
Endothelial_cells__RSAD2	1	1	0.2	0.567216062331435	1	Endothelial_cells	RSAD2
Endothelial_cells__ID2	1	1	0.2	0.567216062331435	1	Endothelial_cells	ID2
Endothelial_cells__IAH1	1	1	0.2	0.567216062331435	1	Endothelial_cells	IAH1
Endothelial_cells__HPCAL1	1	1	0.2	0.567216062331435	1	Endothelial_cells	HPCAL1
Endothelial_cells__TRIB2	1	1	0.2	0.567216062331435	1	Endothelial_cells	TRIB2
Endothelial_cells__FAM49A	1	1	0.2	0.567216062331435	1	Endothelial_cells	FAM49A
Endothelial_cells__SMC6	1	1	0.2	0.567216062331435	1	Endothelial_cells	SMC6
Endothelial_cells__RDH14	1	1	0.2	0.567216062331435	1	Endothelial_cells	RDH14
Endothelial_cells__RHOB	1	1	0.2	0.567216062331435	1	Endothelial_cells	RHOB
Endothelial_cells__HS1BP3	1	1	0.2	0.567216062331435	1	Endothelial_cells	HS1BP3
Endothelial_cells__DNAJC27	1	1	0.2	0.567216062331435	1	Endothelial_cells	DNAJC27
Endothelial_cells__DNMT3A	1	1	0.2	0.567216062331435	1	Endothelial_cells	DNMT3A
Endothelial_cells__KIF3C	1	1	0.2	0.567216062331435	1	Endothelial_cells	KIF3C
Endothelial_cells__SLC35F6	1	1	0.2	0.567216062331435	1	Endothelial_cells	SLC35F6
Endothelial_cells__OST4	1	1	0.2	0.567216062331435	1	Endothelial_cells	OST4
Endothelial_cells__KHK	1	1	0.2	0.567216062331435	1	Endothelial_cells	KHK
Endothelial_cells__PREB	1	1	0.2	0.567216062331435	1	Endothelial_cells	PREB
Endothelial_cells__GTF3C2	1	1	0.2	0.567216062331435	1	Endothelial_cells	GTF3C2
Endothelial_cells__EIF2B4	1	1	0.2	0.567216062331435	1	Endothelial_cells	EIF2B4
Endothelial_cells__PPM1G	1	1	0.2	0.567216062331435	1	Endothelial_cells	PPM1G
Endothelial_cells__NRBP1	1	1	0.2	0.567216062331435	1	Endothelial_cells	NRBP1
Endothelial_cells__WDR43	1	1	0.2	0.567216062331435	1	Endothelial_cells	WDR43
Endothelial_cells__YIPF4	1	1	0.2	0.567216062331435	1	Endothelial_cells	YIPF4
Endothelial_cells__FEZ2	1	1	0.2	0.567216062331435	1	Endothelial_cells	FEZ2
Endothelial_cells__EIF2AK2	1	1	0.2	0.567216062331435	1	Endothelial_cells	EIF2AK2
Endothelial_cells__QPCT	1	1	0.2	0.567216062331435	1	Endothelial_cells	QPCT
Endothelial_cells__RMDN2	1	1	0.2	0.567216062331435	1	Endothelial_cells	RMDN2
Endothelial_cells__ATL2	1	1	0.2	0.567216062331435	1	Endothelial_cells	ATL2
Endothelial_cells__SLC8A1	1	1	0.2	0.567216062331435	1	Endothelial_cells	SLC8A1
Endothelial_cells__EML4	1	1	0.2	0.567216062331435	1	Endothelial_cells	EML4
Endothelial_cells__COX7A2L	1	1	0.2	0.567216062331435	1	Endothelial_cells	COX7A2L
Endothelial_cells__ZFP36L2	1	1	0.2	0.567216062331435	1	Endothelial_cells	ZFP36L2
Endothelial_cells__PRKCE	1	1	0.2	0.567216062331435	1	Endothelial_cells	PRKCE
Endothelial_cells__EPAS1	1	1	0.2	0.567216062331435	1	Endothelial_cells	EPAS1
Endothelial_cells__MCFD2	1	1	0.2	0.567216062331435	1	Endothelial_cells	MCFD2
Endothelial_cells__TTC7A	1	1	0.2	0.567216062331435	1	Endothelial_cells	TTC7A
Endothelial_cells__PPP1R21	1	1	0.2	0.567216062331435	1	Endothelial_cells	PPP1R21
Endothelial_cells__PSME4	1	1	0.2	0.567216062331435	1	Endothelial_cells	PSME4
Endothelial_cells__SPTBN1	1	1	0.2	0.567216062331435	1	Endothelial_cells	SPTBN1
Endothelial_cells__RTN4	1	1	0.2	0.567216062331435	1	Endothelial_cells	RTN4
Endothelial_cells__PPP4R3B	1	1	0.2	0.567216062331435	1	Endothelial_cells	PPP4R3B
Endothelial_cells__PNPT1	1	1	0.2	0.567216062331435	1	Endothelial_cells	PNPT1
Endothelial_cells__CCT4	1	1	0.2	0.567216062331435	1	Endothelial_cells	CCT4
Endothelial_cells__WDPCP	1	1	0.2	0.567216062331435	1	Endothelial_cells	WDPCP
Endothelial_cells__SERTAD2	1	1	0.2	0.567216062331435	1	Endothelial_cells	SERTAD2
Endothelial_cells__CEP68	1	1	0.2	0.567216062331435	1	Endothelial_cells	CEP68
Endothelial_cells__RAB1A	1	1	0.2	0.567216062331435	1	Endothelial_cells	RAB1A
Endothelial_cells__MEIS1	1	1	0.2	0.567216062331435	1	Endothelial_cells	MEIS1
Endothelial_cells__C1D	1	1	0.2	0.567216062331435	1	Endothelial_cells	C1D
Endothelial_cells__PNO1	1	1	0.2	0.567216062331435	1	Endothelial_cells	PNO1
Endothelial_cells__ARHGAP25	1	1	0.2	0.567216062331435	1	Endothelial_cells	ARHGAP25
Endothelial_cells__NFU1	1	1	0.2	0.567216062331435	1	Endothelial_cells	NFU1
Endothelial_cells__ANXA4	1	1	0.2	0.567216062331435	1	Endothelial_cells	ANXA4
Endothelial_cells__MXD1	1	1	0.2	0.567216062331435	1	Endothelial_cells	MXD1
Endothelial_cells__FAM136A	1	1	0.2	0.567216062331435	1	Endothelial_cells	FAM136A
Endothelial_cells__MCEE	1	1	0.2	0.567216062331435	1	Endothelial_cells	MCEE
Endothelial_cells__MPHOSPH10	1	1	0.2	0.567216062331435	1	Endothelial_cells	MPHOSPH10
Endothelial_cells__ALMS1	1	1	0.2	0.567216062331435	1	Endothelial_cells	ALMS1
Endothelial_cells__MTHFD2	1	1	0.2	0.567216062331435	1	Endothelial_cells	MTHFD2
Endothelial_cells__WDR54	1	1	0.2	0.567216062331435	1	Endothelial_cells	WDR54
Endothelial_cells__RTKN	1	1	0.2	0.567216062331435	1	Endothelial_cells	RTKN
Endothelial_cells__INO80B	1	1	0.2	0.567216062331435	1	Endothelial_cells	INO80B
Endothelial_cells__PCGF1	1	1	0.2	0.567216062331435	1	Endothelial_cells	PCGF1
Endothelial_cells__HTRA2	1	1	0.2	0.567216062331435	1	Endothelial_cells	HTRA2
Endothelial_cells__TGOLN2	1	1	0.2	0.567216062331435	1	Endothelial_cells	TGOLN2
Endothelial_cells__VAMP8	1	1	0.2	0.567216062331435	1	Endothelial_cells	VAMP8
Endothelial_cells__VAMP5	1	1	0.2	0.567216062331435	1	Endothelial_cells	VAMP5
Endothelial_cells__C2ORF68	1	1	0.2	0.567216062331435	1	Endothelial_cells	C2ORF68
Endothelial_cells__KRCC1	1	1	0.2	0.567216062331435	1	Endothelial_cells	KRCC1
Endothelial_cells__TMEM127	1	1	0.2	0.567216062331435	1	Endothelial_cells	TMEM127
Endothelial_cells__INPP4A	1	1	0.2	0.567216062331435	1	Endothelial_cells	INPP4A
Endothelial_cells__MGAT4A	1	1	0.2	0.567216062331435	1	Endothelial_cells	MGAT4A
Endothelial_cells__TXNDC9	1	1	0.2	0.567216062331435	1	Endothelial_cells	TXNDC9
Endothelial_cells__EIF5B	1	1	0.2	0.567216062331435	1	Endothelial_cells	EIF5B
Endothelial_cells__AFF3	1	1	0.2	0.567216062331435	1	Endothelial_cells	AFF3
Endothelial_cells__PDCL3	1	1	0.2	0.567216062331435	1	Endothelial_cells	PDCL3
Endothelial_cells__MAP4K4	1	1	0.2	0.567216062331435	1	Endothelial_cells	MAP4K4
Endothelial_cells__IL18R1	1	1	0.2	0.567216062331435	1	Endothelial_cells	IL18R1
Endothelial_cells__TGFBRAP1	1	1	0.2	0.567216062331435	1	Endothelial_cells	TGFBRAP1
Endothelial_cells__FHL2	1	1	0.2	0.567216062331435	1	Endothelial_cells	FHL2
Endothelial_cells__NCK2	1	1	0.2	0.567216062331435	1	Endothelial_cells	NCK2
Endothelial_cells__GCC2	1	1	0.2	0.567216062331435	1	Endothelial_cells	GCC2
Endothelial_cells__LIMS1	1	1	0.2	0.567216062331435	1	Endothelial_cells	LIMS1
Endothelial_cells__BCL2L11	1	1	0.2	0.567216062331435	1	Endothelial_cells	BCL2L11
Endothelial_cells__TMEM87B	1	1	0.2	0.567216062331435	1	Endothelial_cells	TMEM87B
Endothelial_cells__TTL	1	1	0.2	0.567216062331435	1	Endothelial_cells	TTL
Endothelial_cells__C2ORF76	1	1	0.2	0.567216062331435	1	Endothelial_cells	C2ORF76
Endothelial_cells__CLASP1	1	1	0.2	0.567216062331435	1	Endothelial_cells	CLASP1
Endothelial_cells__NIFK	1	1	0.2	0.567216062331435	1	Endothelial_cells	NIFK
Endothelial_cells__TSN	1	1	0.2	0.567216062331435	1	Endothelial_cells	TSN
Endothelial_cells__BIN1	1	1	0.2	0.567216062331435	1	Endothelial_cells	BIN1
Endothelial_cells__ERCC3	1	1	0.2	0.567216062331435	1	Endothelial_cells	ERCC3
Endothelial_cells__MZT2B	1	1	0.2	0.567216062331435	1	Endothelial_cells	MZT2B
Endothelial_cells__PLEKHB2	1	1	0.2	0.567216062331435	1	Endothelial_cells	PLEKHB2
Endothelial_cells__MZT2A	1	1	0.2	0.567216062331435	1	Endothelial_cells	MZT2A
Endothelial_cells__MGAT5	1	1	0.2	0.567216062331435	1	Endothelial_cells	MGAT5
Endothelial_cells__DARS	1	1	0.2	0.567216062331435	1	Endothelial_cells	DARS
Endothelial_cells__GTDC1	1	1	0.2	0.567216062331435	1	Endothelial_cells	GTDC1
Endothelial_cells__ORC4	1	1	0.2	0.567216062331435	1	Endothelial_cells	ORC4
Endothelial_cells__FMNL2	1	1	0.2	0.567216062331435	1	Endothelial_cells	FMNL2
Endothelial_cells__ARL6IP6	1	1	0.2	0.567216062331435	1	Endothelial_cells	ARL6IP6
Endothelial_cells__NR4A2	1	1	0.2	0.567216062331435	1	Endothelial_cells	NR4A2
Endothelial_cells__BAZ2B	1	1	0.2	0.567216062331435	1	Endothelial_cells	BAZ2B
Endothelial_cells__RBMS1	1	1	0.2	0.567216062331435	1	Endothelial_cells	RBMS1
Endothelial_cells__PSMD14	1	1	0.2	0.567216062331435	1	Endothelial_cells	PSMD14
Endothelial_cells__IFIH1	1	1	0.2	0.567216062331435	1	Endothelial_cells	IFIH1
Endothelial_cells__GCA	1	1	0.2	0.567216062331435	1	Endothelial_cells	GCA
Endothelial_cells__SCN9A	1	1	0.2	0.567216062331435	1	Endothelial_cells	SCN9A
Endothelial_cells__CERS6	1	1	0.2	0.567216062331435	1	Endothelial_cells	CERS6
Endothelial_cells__KLHL23	1	1	0.2	0.567216062331435	1	Endothelial_cells	KLHL23
Endothelial_cells__METTL8	1	1	0.2	0.567216062331435	1	Endothelial_cells	METTL8
Endothelial_cells__PDK1	1	1	0.2	0.567216062331435	1	Endothelial_cells	PDK1
Endothelial_cells__CHN1	1	1	0.2	0.567216062331435	1	Endothelial_cells	CHN1
Endothelial_cells__MTX2	1	1	0.2	0.567216062331435	1	Endothelial_cells	MTX2
Endothelial_cells__RBM45	1	1	0.2	0.567216062331435	1	Endothelial_cells	RBM45
Endothelial_cells__PLEKHA3	1	1	0.2	0.567216062331435	1	Endothelial_cells	PLEKHA3
Endothelial_cells__TTN	1	1	0.2	0.567216062331435	1	Endothelial_cells	TTN
Endothelial_cells__CWC22	1	1	0.2	0.567216062331435	1	Endothelial_cells	CWC22
Endothelial_cells__NCKAP1	1	1	0.2	0.567216062331435	1	Endothelial_cells	NCKAP1
Endothelial_cells__ZC3H15	1	1	0.2	0.567216062331435	1	Endothelial_cells	ZC3H15
Endothelial_cells__FAM171B	1	1	0.2	0.567216062331435	1	Endothelial_cells	FAM171B
Endothelial_cells__TFPI	1	1	0.2	0.567216062331435	1	Endothelial_cells	TFPI
Endothelial_cells__ORMDL1	1	1	0.2	0.567216062331435	1	Endothelial_cells	ORMDL1
Endothelial_cells__C2ORF88	1	1	0.2	0.567216062331435	1	Endothelial_cells	C2ORF88
Endothelial_cells__HIBCH	1	1	0.2	0.567216062331435	1	Endothelial_cells	HIBCH
Endothelial_cells__INPP1	1	1	0.2	0.567216062331435	1	Endothelial_cells	INPP1
Endothelial_cells__MFSD6	1	1	0.2	0.567216062331435	1	Endothelial_cells	MFSD6
Endothelial_cells__MYO1B	1	1	0.2	0.567216062331435	1	Endothelial_cells	MYO1B
Endothelial_cells__NABP1	1	1	0.2	0.567216062331435	1	Endothelial_cells	NABP1
Endothelial_cells__SLC39A10	1	1	0.2	0.567216062331435	1	Endothelial_cells	SLC39A10
Endothelial_cells__HECW2	1	1	0.2	0.567216062331435	1	Endothelial_cells	HECW2
Endothelial_cells__GTF3C3	1	1	0.2	0.567216062331435	1	Endothelial_cells	GTF3C3
Endothelial_cells__ANKRD44	1	1	0.2	0.567216062331435	1	Endothelial_cells	ANKRD44
Endothelial_cells__HSPD1	1	1	0.2	0.567216062331435	1	Endothelial_cells	HSPD1
Endothelial_cells__HSPE1	1	1	0.2	0.567216062331435	1	Endothelial_cells	HSPE1
Endothelial_cells__C2ORF69	1	1	0.2	0.567216062331435	1	Endothelial_cells	C2ORF69
Endothelial_cells__PPIL3	1	1	0.2	0.567216062331435	1	Endothelial_cells	PPIL3
Endothelial_cells__ORC2	1	1	0.2	0.567216062331435	1	Endothelial_cells	ORC2
Endothelial_cells__FAM126B	1	1	0.2	0.567216062331435	1	Endothelial_cells	FAM126B
Endothelial_cells__CFLAR	1	1	0.2	0.567216062331435	1	Endothelial_cells	CFLAR
Endothelial_cells__TRAK2	1	1	0.2	0.567216062331435	1	Endothelial_cells	TRAK2
Endothelial_cells__STRADB	1	1	0.2	0.567216062331435	1	Endothelial_cells	STRADB
Endothelial_cells__NOP58	1	1	0.2	0.567216062331435	1	Endothelial_cells	NOP58
Endothelial_cells__BMPR2	1	1	0.2	0.567216062331435	1	Endothelial_cells	BMPR2
Endothelial_cells__WDR12	1	1	0.2	0.567216062331435	1	Endothelial_cells	WDR12
Endothelial_cells__CYP20A1	1	1	0.2	0.567216062331435	1	Endothelial_cells	CYP20A1
Endothelial_cells__NRP2	1	1	0.2	0.567216062331435	1	Endothelial_cells	NRP2
Endothelial_cells__EEF1B2	1	1	0.2	0.567216062331435	1	Endothelial_cells	EEF1B2
Endothelial_cells__ADAM23	1	1	0.2	0.567216062331435	1	Endothelial_cells	ADAM23
Endothelial_cells__KLF7	1	1	0.2	0.567216062331435	1	Endothelial_cells	KLF7
Endothelial_cells__SPAG16	1	1	0.2	0.567216062331435	1	Endothelial_cells	SPAG16
Endothelial_cells__BARD1	1	1	0.2	0.567216062331435	1	Endothelial_cells	BARD1
Endothelial_cells__FN1	1	1	0.2	0.567216062331435	1	Endothelial_cells	FN1
Endothelial_cells__ARPC2	1	1	0.2	0.567216062331435	1	Endothelial_cells	ARPC2
Endothelial_cells__TMBIM1	1	1	0.2	0.567216062331435	1	Endothelial_cells	TMBIM1
Endothelial_cells__CTDSP1	1	1	0.2	0.567216062331435	1	Endothelial_cells	CTDSP1
Endothelial_cells__CYP27A1	1	1	0.2	0.567216062331435	1	Endothelial_cells	CYP27A1
Endothelial_cells__DNPEP	1	1	0.2	0.567216062331435	1	Endothelial_cells	DNPEP
Endothelial_cells__EPHA4	1	1	0.2	0.567216062331435	1	Endothelial_cells	EPHA4
Endothelial_cells__FAM124B	1	1	0.2	0.567216062331435	1	Endothelial_cells	FAM124B
Endothelial_cells__SP100	1	1	0.2	0.567216062331435	1	Endothelial_cells	SP100
Endothelial_cells__NCL	1	1	0.2	0.567216062331435	1	Endothelial_cells	NCL
Endothelial_cells__COPS7B	1	1	0.2	0.567216062331435	1	Endothelial_cells	COPS7B
Endothelial_cells__DIS3L2	1	1	0.2	0.567216062331435	1	Endothelial_cells	DIS3L2
Endothelial_cells__EIF4E2	1	1	0.2	0.567216062331435	1	Endothelial_cells	EIF4E2
Endothelial_cells__COPS8	1	1	0.2	0.567216062331435	1	Endothelial_cells	COPS8
Endothelial_cells__COL6A3	1	1	0.2	0.567216062331435	1	Endothelial_cells	COL6A3
Endothelial_cells__UBE2F	1	1	0.2	0.567216062331435	1	Endothelial_cells	UBE2F
Endothelial_cells__RNPEPL1	1	1	0.2	0.567216062331435	1	Endothelial_cells	RNPEPL1
Endothelial_cells__HDLBP	1	1	0.2	0.567216062331435	1	Endothelial_cells	HDLBP
Endothelial_cells__STK25	1	1	0.2	0.567216062331435	1	Endothelial_cells	STK25
Endothelial_cells__THAP4	1	1	0.2	0.567216062331435	1	Endothelial_cells	THAP4
Endothelial_cells__CHL1	1	1	0.2	0.567216062331435	1	Endothelial_cells	CHL1
Endothelial_cells__SETMAR	1	1	0.2	0.567216062331435	1	Endothelial_cells	SETMAR
Endothelial_cells__BHLHE40	1	1	0.2	0.567216062331435	1	Endothelial_cells	BHLHE40
Endothelial_cells__THUMPD3	1	1	0.2	0.567216062331435	1	Endothelial_cells	THUMPD3
Endothelial_cells__MTMR14	1	1	0.2	0.567216062331435	1	Endothelial_cells	MTMR14
Endothelial_cells__BRPF1	1	1	0.2	0.567216062331435	1	Endothelial_cells	BRPF1
Endothelial_cells__OGG1	1	1	0.2	0.567216062331435	1	Endothelial_cells	OGG1
Endothelial_cells__CAMK1	1	1	0.2	0.567216062331435	1	Endothelial_cells	CAMK1
Endothelial_cells__TADA3	1	1	0.2	0.567216062331435	1	Endothelial_cells	TADA3
Endothelial_cells__TTLL3	1	1	0.2	0.567216062331435	1	Endothelial_cells	TTLL3
Endothelial_cells__RPUSD3	1	1	0.2	0.567216062331435	1	Endothelial_cells	RPUSD3
Endothelial_cells__CRELD1	1	1	0.2	0.567216062331435	1	Endothelial_cells	CRELD1
Endothelial_cells__HRH1	1	1	0.2	0.567216062331435	1	Endothelial_cells	HRH1
Endothelial_cells__ATG7	1	1	0.2	0.567216062331435	1	Endothelial_cells	ATG7
Endothelial_cells__VGLL4	1	1	0.2	0.567216062331435	1	Endothelial_cells	VGLL4
Endothelial_cells__PPARG	1	1	0.2	0.567216062331435	1	Endothelial_cells	PPARG
Endothelial_cells__MKRN2	1	1	0.2	0.567216062331435	1	Endothelial_cells	MKRN2
Endothelial_cells__IQSEC1	1	1	0.2	0.567216062331435	1	Endothelial_cells	IQSEC1
Endothelial_cells__HDAC11	1	1	0.2	0.567216062331435	1	Endothelial_cells	HDAC11
Endothelial_cells__FBLN2	1	1	0.2	0.567216062331435	1	Endothelial_cells	FBLN2
Endothelial_cells__SLC6A6	1	1	0.2	0.567216062331435	1	Endothelial_cells	SLC6A6
Endothelial_cells__SH3BP5	1	1	0.2	0.567216062331435	1	Endothelial_cells	SH3BP5
Endothelial_cells__ANKRD28	1	1	0.2	0.567216062331435	1	Endothelial_cells	ANKRD28
Endothelial_cells__DPH3	1	1	0.2	0.567216062331435	1	Endothelial_cells	DPH3
Endothelial_cells__RFTN1	1	1	0.2	0.567216062331435	1	Endothelial_cells	RFTN1
Endothelial_cells__RAB5A	1	1	0.2	0.567216062331435	1	Endothelial_cells	RAB5A
Endothelial_cells__UBE2E1	1	1	0.2	0.567216062331435	1	Endothelial_cells	UBE2E1
Endothelial_cells__THRB	1	1	0.2	0.567216062331435	1	Endothelial_cells	THRB
Endothelial_cells__CMC1	1	1	0.2	0.567216062331435	1	Endothelial_cells	CMC1
Endothelial_cells__RBMS3	1	1	0.2	0.567216062331435	1	Endothelial_cells	RBMS3
Endothelial_cells__TGFBR2	1	1	0.2	0.567216062331435	1	Endothelial_cells	TGFBR2
Endothelial_cells__GPD1L	1	1	0.2	0.567216062331435	1	Endothelial_cells	GPD1L
Endothelial_cells__CMTM8	1	1	0.2	0.567216062331435	1	Endothelial_cells	CMTM8
Endothelial_cells__CMTM6	1	1	0.2	0.567216062331435	1	Endothelial_cells	CMTM6
Endothelial_cells__GLB1	1	1	0.2	0.567216062331435	1	Endothelial_cells	GLB1
Endothelial_cells__CRTAP	1	1	0.2	0.567216062331435	1	Endothelial_cells	CRTAP
Endothelial_cells__UBP1	1	1	0.2	0.567216062331435	1	Endothelial_cells	UBP1
Endothelial_cells__CLASP2	1	1	0.2	0.567216062331435	1	Endothelial_cells	CLASP2
Endothelial_cells__CTDSPL	1	1	0.2	0.567216062331435	1	Endothelial_cells	CTDSPL
Endothelial_cells__PLCD1	1	1	0.2	0.567216062331435	1	Endothelial_cells	PLCD1
Endothelial_cells__MYD88	1	1	0.2	0.567216062331435	1	Endothelial_cells	MYD88
Endothelial_cells__WDR48	1	1	0.2	0.567216062331435	1	Endothelial_cells	WDR48
Endothelial_cells__SLC25A38	1	1	0.2	0.567216062331435	1	Endothelial_cells	SLC25A38
Endothelial_cells__ULK4	1	1	0.2	0.567216062331435	1	Endothelial_cells	ULK4
Endothelial_cells__VIPR1	1	1	0.2	0.567216062331435	1	Endothelial_cells	VIPR1
Endothelial_cells__SEC22C	1	1	0.2	0.567216062331435	1	Endothelial_cells	SEC22C
Endothelial_cells__NKTR	1	1	0.2	0.567216062331435	1	Endothelial_cells	NKTR
Endothelial_cells__POMGNT2	1	1	0.2	0.567216062331435	1	Endothelial_cells	POMGNT2
Endothelial_cells__TCAIM	1	1	0.2	0.567216062331435	1	Endothelial_cells	TCAIM
Endothelial_cells__ZNF445	1	1	0.2	0.567216062331435	1	Endothelial_cells	ZNF445
Endothelial_cells__ZNF197	1	1	0.2	0.567216062331435	1	Endothelial_cells	ZNF197
Endothelial_cells__ZNF35	1	1	0.2	0.567216062331435	1	Endothelial_cells	ZNF35
Endothelial_cells__LIMD1	1	1	0.2	0.567216062331435	1	Endothelial_cells	LIMD1
Endothelial_cells__FYCO1	1	1	0.2	0.567216062331435	1	Endothelial_cells	FYCO1
Endothelial_cells__ALS2CL	1	1	0.2	0.567216062331435	1	Endothelial_cells	ALS2CL
Endothelial_cells__CCDC12	1	1	0.2	0.567216062331435	1	Endothelial_cells	CCDC12
Endothelial_cells__KLHL18	1	1	0.2	0.567216062331435	1	Endothelial_cells	KLHL18
Endothelial_cells__PTPN23	1	1	0.2	0.567216062331435	1	Endothelial_cells	PTPN23
Endothelial_cells__SMARCC1	1	1	0.2	0.567216062331435	1	Endothelial_cells	SMARCC1
Endothelial_cells__NME6	1	1	0.2	0.567216062331435	1	Endothelial_cells	NME6
Endothelial_cells__WDR6	1	1	0.2	0.567216062331435	1	Endothelial_cells	WDR6
Endothelial_cells__DALRD3	1	1	0.2	0.567216062331435	1	Endothelial_cells	DALRD3
Endothelial_cells__IMPDH2	1	1	0.2	0.567216062331435	1	Endothelial_cells	IMPDH2
Endothelial_cells__KLHDC8B	1	1	0.2	0.567216062331435	1	Endothelial_cells	KLHDC8B
Endothelial_cells__C3ORF62	1	1	0.2	0.567216062331435	1	Endothelial_cells	C3ORF62
Endothelial_cells__UBA7	1	1	0.2	0.567216062331435	1	Endothelial_cells	UBA7
Endothelial_cells__MON1A	1	1	0.2	0.567216062331435	1	Endothelial_cells	MON1A
Endothelial_cells__GNAI2	1	1	0.2	0.567216062331435	1	Endothelial_cells	GNAI2
Endothelial_cells__IFRD2	1	1	0.2	0.567216062331435	1	Endothelial_cells	IFRD2
Endothelial_cells__HYAL2	1	1	0.2	0.567216062331435	1	Endothelial_cells	HYAL2
Endothelial_cells__RASSF1	1	1	0.2	0.567216062331435	1	Endothelial_cells	RASSF1
Endothelial_cells__TEX264	1	1	0.2	0.567216062331435	1	Endothelial_cells	TEX264
Endothelial_cells__ABHD14B	1	1	0.2	0.567216062331435	1	Endothelial_cells	ABHD14B
Endothelial_cells__ABHD14A	1	1	0.2	0.567216062331435	1	Endothelial_cells	ABHD14A
Endothelial_cells__TWF2	1	1	0.2	0.567216062331435	1	Endothelial_cells	TWF2
Endothelial_cells__WDR82	1	1	0.2	0.567216062331435	1	Endothelial_cells	WDR82
Endothelial_cells__STAB1	1	1	0.2	0.567216062331435	1	Endothelial_cells	STAB1
Endothelial_cells__NT5DC2	1	1	0.2	0.567216062331435	1	Endothelial_cells	NT5DC2
Endothelial_cells__SMIM4	1	1	0.2	0.567216062331435	1	Endothelial_cells	SMIM4
Endothelial_cells__GNL3	1	1	0.2	0.567216062331435	1	Endothelial_cells	GNL3
Endothelial_cells__CCDC66	1	1	0.2	0.567216062331435	1	Endothelial_cells	CCDC66
Endothelial_cells__DENND6A	1	1	0.2	0.567216062331435	1	Endothelial_cells	DENND6A
Endothelial_cells__FLNB	1	1	0.2	0.567216062331435	1	Endothelial_cells	FLNB
Endothelial_cells__ABHD6	1	1	0.2	0.567216062331435	1	Endothelial_cells	ABHD6
Endothelial_cells__RPP14	1	1	0.2	0.567216062331435	1	Endothelial_cells	RPP14
Endothelial_cells__SLC25A26	1	1	0.2	0.567216062331435	1	Endothelial_cells	SLC25A26
Endothelial_cells__UBA3	1	1	0.2	0.567216062331435	1	Endothelial_cells	UBA3
Endothelial_cells__FRMD4B	1	1	0.2	0.567216062331435	1	Endothelial_cells	FRMD4B
Endothelial_cells__SHQ1	1	1	0.2	0.567216062331435	1	Endothelial_cells	SHQ1
Endothelial_cells__PPP4R2	1	1	0.2	0.567216062331435	1	Endothelial_cells	PPP4R2
Endothelial_cells__ROBO1	1	1	0.2	0.567216062331435	1	Endothelial_cells	ROBO1
Endothelial_cells__GBE1	1	1	0.2	0.567216062331435	1	Endothelial_cells	GBE1
Endothelial_cells__CHMP2B	1	1	0.2	0.567216062331435	1	Endothelial_cells	CHMP2B
Endothelial_cells__C3ORF38	1	1	0.2	0.567216062331435	1	Endothelial_cells	C3ORF38
Endothelial_cells__NSUN3	1	1	0.2	0.567216062331435	1	Endothelial_cells	NSUN3
Endothelial_cells__TRMT10C	1	1	0.2	0.567216062331435	1	Endothelial_cells	TRMT10C
Endothelial_cells__CEP97	1	1	0.2	0.567216062331435	1	Endothelial_cells	CEP97
Endothelial_cells__NXPE3	1	1	0.2	0.567216062331435	1	Endothelial_cells	NXPE3
Endothelial_cells__NFKBIZ	1	1	0.2	0.567216062331435	1	Endothelial_cells	NFKBIZ
Endothelial_cells__ALCAM	1	1	0.2	0.567216062331435	1	Endothelial_cells	ALCAM
Endothelial_cells__CBLB	1	1	0.2	0.567216062331435	1	Endothelial_cells	CBLB
Endothelial_cells__IFT57	1	1	0.2	0.567216062331435	1	Endothelial_cells	IFT57
Endothelial_cells__ABHD10	1	1	0.2	0.567216062331435	1	Endothelial_cells	ABHD10
Endothelial_cells__CD200	1	1	0.2	0.567216062331435	1	Endothelial_cells	CD200
Endothelial_cells__GTPBP8	1	1	0.2	0.567216062331435	1	Endothelial_cells	GTPBP8
Endothelial_cells__B4GALT4	1	1	0.2	0.567216062331435	1	Endothelial_cells	B4GALT4
Endothelial_cells__PLA1A	1	1	0.2	0.567216062331435	1	Endothelial_cells	PLA1A
Endothelial_cells__GTF2E1	1	1	0.2	0.567216062331435	1	Endothelial_cells	GTF2E1
Endothelial_cells__HCLS1	1	1	0.2	0.567216062331435	1	Endothelial_cells	HCLS1
Endothelial_cells__FAM162A	1	1	0.2	0.567216062331435	1	Endothelial_cells	FAM162A
Endothelial_cells__PARP9	1	1	0.2	0.567216062331435	1	Endothelial_cells	PARP9
Endothelial_cells__PARP14	1	1	0.2	0.567216062331435	1	Endothelial_cells	PARP14
Endothelial_cells__HSPBAP1	1	1	0.2	0.567216062331435	1	Endothelial_cells	HSPBAP1
Endothelial_cells__PDIA5	1	1	0.2	0.567216062331435	1	Endothelial_cells	PDIA5
Endothelial_cells__MYLK	1	1	0.2	0.567216062331435	1	Endothelial_cells	MYLK
Endothelial_cells__KALRN	1	1	0.2	0.567216062331435	1	Endothelial_cells	KALRN
Endothelial_cells__ITGB5	1	1	0.2	0.567216062331435	1	Endothelial_cells	ITGB5
Endothelial_cells__SNX4	1	1	0.2	0.567216062331435	1	Endothelial_cells	SNX4
Endothelial_cells__MGLL	1	1	0.2	0.567216062331435	1	Endothelial_cells	MGLL
Endothelial_cells__RPN1	1	1	0.2	0.567216062331435	1	Endothelial_cells	RPN1
Endothelial_cells__HMCES	1	1	0.2	0.567216062331435	1	Endothelial_cells	HMCES
Endothelial_cells__PLXND1	1	1	0.2	0.567216062331435	1	Endothelial_cells	PLXND1
Endothelial_cells__UBA5	1	1	0.2	0.567216062331435	1	Endothelial_cells	UBA5
Endothelial_cells__SRPRB	1	1	0.2	0.567216062331435	1	Endothelial_cells	SRPRB
Endothelial_cells__SLC35G2	1	1	0.2	0.567216062331435	1	Endothelial_cells	SLC35G2
Endothelial_cells__DBR1	1	1	0.2	0.567216062331435	1	Endothelial_cells	DBR1
Endothelial_cells__MRAS	1	1	0.2	0.567216062331435	1	Endothelial_cells	MRAS
Endothelial_cells__ATP1B3	1	1	0.2	0.567216062331435	1	Endothelial_cells	ATP1B3
Endothelial_cells__U2SURP	1	1	0.2	0.567216062331435	1	Endothelial_cells	U2SURP
Endothelial_cells__CHST2	1	1	0.2	0.567216062331435	1	Endothelial_cells	CHST2
Endothelial_cells__SLC9A9	1	1	0.2	0.567216062331435	1	Endothelial_cells	SLC9A9
Endothelial_cells__GYG1	1	1	0.2	0.567216062331435	1	Endothelial_cells	GYG1
Endothelial_cells__HPS3	1	1	0.2	0.567216062331435	1	Endothelial_cells	HPS3
Endothelial_cells__WWTR1	1	1	0.2	0.567216062331435	1	Endothelial_cells	WWTR1
Endothelial_cells__RNF13	1	1	0.2	0.567216062331435	1	Endothelial_cells	RNF13
Endothelial_cells__P2RY1	1	1	0.2	0.567216062331435	1	Endothelial_cells	P2RY1
Endothelial_cells__SLC33A1	1	1	0.2	0.567216062331435	1	Endothelial_cells	SLC33A1
Endothelial_cells__SSR3	1	1	0.2	0.567216062331435	1	Endothelial_cells	SSR3
Endothelial_cells__TIPARP	1	1	0.2	0.567216062331435	1	Endothelial_cells	TIPARP
Endothelial_cells__CCNL1	1	1	0.2	0.567216062331435	1	Endothelial_cells	CCNL1
Endothelial_cells__PTX3	1	1	0.2	0.567216062331435	1	Endothelial_cells	PTX3
Endothelial_cells__MLF1	1	1	0.2	0.567216062331435	1	Endothelial_cells	MLF1
Endothelial_cells__LXN	1	1	0.2	0.567216062331435	1	Endothelial_cells	LXN
Endothelial_cells__SMC4	1	1	0.2	0.567216062331435	1	Endothelial_cells	SMC4
Endothelial_cells__B3GALNT1	1	1	0.2	0.567216062331435	1	Endothelial_cells	B3GALNT1
Endothelial_cells__NMD3	1	1	0.2	0.567216062331435	1	Endothelial_cells	NMD3
Endothelial_cells__GPR160	1	1	0.2	0.567216062331435	1	Endothelial_cells	GPR160
Endothelial_cells__PRKCI	1	1	0.2	0.567216062331435	1	Endothelial_cells	PRKCI
Endothelial_cells__TNFSF10	1	1	0.2	0.567216062331435	1	Endothelial_cells	TNFSF10
Endothelial_cells__NCEH1	1	1	0.2	0.567216062331435	1	Endothelial_cells	NCEH1
Endothelial_cells__ZMAT3	1	1	0.2	0.567216062331435	1	Endothelial_cells	ZMAT3
Endothelial_cells__TTC14	1	1	0.2	0.567216062331435	1	Endothelial_cells	TTC14
Endothelial_cells__YEATS2	1	1	0.2	0.567216062331435	1	Endothelial_cells	YEATS2
Endothelial_cells__ABCC5	1	1	0.2	0.567216062331435	1	Endothelial_cells	ABCC5
Endothelial_cells__EIF4G1	1	1	0.2	0.567216062331435	1	Endothelial_cells	EIF4G1
Endothelial_cells__POLR2H	1	1	0.2	0.567216062331435	1	Endothelial_cells	POLR2H
Endothelial_cells__SENP2	1	1	0.2	0.567216062331435	1	Endothelial_cells	SENP2
Endothelial_cells__ETV5	1	1	0.2	0.567216062331435	1	Endothelial_cells	ETV5
Endothelial_cells__ST6GAL1	1	1	0.2	0.567216062331435	1	Endothelial_cells	ST6GAL1
Endothelial_cells__RTP4	1	1	0.2	0.567216062331435	1	Endothelial_cells	RTP4
Endothelial_cells__BCL6	1	1	0.2	0.567216062331435	1	Endothelial_cells	BCL6
Endothelial_cells__CCDC50	1	1	0.2	0.567216062331435	1	Endothelial_cells	CCDC50
Endothelial_cells__XXYLT1	1	1	0.2	0.567216062331435	1	Endothelial_cells	XXYLT1
Endothelial_cells__TNK2	1	1	0.2	0.567216062331435	1	Endothelial_cells	TNK2
Endothelial_cells__TFRC	1	1	0.2	0.567216062331435	1	Endothelial_cells	TFRC
Endothelial_cells__NCBP2	1	1	0.2	0.567216062331435	1	Endothelial_cells	NCBP2
Endothelial_cells__PCGF3	1	1	0.2	0.567216062331435	1	Endothelial_cells	PCGF3
Endothelial_cells__CPLX1	1	1	0.2	0.567216062331435	1	Endothelial_cells	CPLX1
Endothelial_cells__UVSSA	1	1	0.2	0.567216062331435	1	Endothelial_cells	UVSSA
Endothelial_cells__SLBP	1	1	0.2	0.567216062331435	1	Endothelial_cells	SLBP
Endothelial_cells__TMEM129	1	1	0.2	0.567216062331435	1	Endothelial_cells	TMEM129
Endothelial_cells__C4ORF48	1	1	0.2	0.567216062331435	1	Endothelial_cells	C4ORF48
Endothelial_cells__MXD4	1	1	0.2	0.567216062331435	1	Endothelial_cells	MXD4
Endothelial_cells__RNF4	1	1	0.2	0.567216062331435	1	Endothelial_cells	RNF4
Endothelial_cells__ADD1	1	1	0.2	0.567216062331435	1	Endothelial_cells	ADD1
Endothelial_cells__MFSD10	1	1	0.2	0.567216062331435	1	Endothelial_cells	MFSD10
Endothelial_cells__RGS12	1	1	0.2	0.567216062331435	1	Endothelial_cells	RGS12
Endothelial_cells__TMEM128	1	1	0.2	0.567216062331435	1	Endothelial_cells	TMEM128
Endothelial_cells__LYAR	1	1	0.2	0.567216062331435	1	Endothelial_cells	LYAR
Endothelial_cells__WFS1	1	1	0.2	0.567216062331435	1	Endothelial_cells	WFS1
Endothelial_cells__BLOC1S4	1	1	0.2	0.567216062331435	1	Endothelial_cells	BLOC1S4
Endothelial_cells__GRPEL1	1	1	0.2	0.567216062331435	1	Endothelial_cells	GRPEL1
Endothelial_cells__AFAP1	1	1	0.2	0.567216062331435	1	Endothelial_cells	AFAP1
Endothelial_cells__ABLIM2	1	1	0.2	0.567216062331435	1	Endothelial_cells	ABLIM2
Endothelial_cells__SH3TC1	1	1	0.2	0.567216062331435	1	Endothelial_cells	SH3TC1
Endothelial_cells__ACOX3	1	1	0.2	0.567216062331435	1	Endothelial_cells	ACOX3
Endothelial_cells__ZNF518B	1	1	0.2	0.567216062331435	1	Endothelial_cells	ZNF518B
Endothelial_cells__RAB28	1	1	0.2	0.567216062331435	1	Endothelial_cells	RAB28
Endothelial_cells__LDB2	1	1	0.2	0.567216062331435	1	Endothelial_cells	LDB2
Endothelial_cells__QDPR	1	1	0.2	0.567216062331435	1	Endothelial_cells	QDPR
Endothelial_cells__LAP3	1	1	0.2	0.567216062331435	1	Endothelial_cells	LAP3
Endothelial_cells__SEL1L3	1	1	0.2	0.567216062331435	1	Endothelial_cells	SEL1L3
Endothelial_cells__SMIM20	1	1	0.2	0.567216062331435	1	Endothelial_cells	SMIM20
Endothelial_cells__TBC1D19	1	1	0.2	0.567216062331435	1	Endothelial_cells	TBC1D19
Endothelial_cells__RELL1	1	1	0.2	0.567216062331435	1	Endothelial_cells	RELL1
Endothelial_cells__PGM2	1	1	0.2	0.567216062331435	1	Endothelial_cells	PGM2
Endothelial_cells__WDR19	1	1	0.2	0.567216062331435	1	Endothelial_cells	WDR19
Endothelial_cells__SMIM14	1	1	0.2	0.567216062331435	1	Endothelial_cells	SMIM14
Endothelial_cells__N4BP2	1	1	0.2	0.567216062331435	1	Endothelial_cells	N4BP2
Endothelial_cells__SLC30A9	1	1	0.2	0.567216062331435	1	Endothelial_cells	SLC30A9
Endothelial_cells__GNPDA2	1	1	0.2	0.567216062331435	1	Endothelial_cells	GNPDA2
Endothelial_cells__COMMD8	1	1	0.2	0.567216062331435	1	Endothelial_cells	COMMD8
Endothelial_cells__ATP10D	1	1	0.2	0.567216062331435	1	Endothelial_cells	ATP10D
Endothelial_cells__FRYL	1	1	0.2	0.567216062331435	1	Endothelial_cells	FRYL
Endothelial_cells__SGCB	1	1	0.2	0.567216062331435	1	Endothelial_cells	SGCB
Endothelial_cells__CLOCK	1	1	0.2	0.567216062331435	1	Endothelial_cells	CLOCK
Endothelial_cells__PPAT	1	1	0.2	0.567216062331435	1	Endothelial_cells	PPAT
Endothelial_cells__PAICS	1	1	0.2	0.567216062331435	1	Endothelial_cells	PAICS
Endothelial_cells__HOPX	1	1	0.2	0.567216062331435	1	Endothelial_cells	HOPX
Endothelial_cells__REST	1	1	0.2	0.567216062331435	1	Endothelial_cells	REST
Endothelial_cells__NOA1	1	1	0.2	0.567216062331435	1	Endothelial_cells	NOA1
Endothelial_cells__IGFBP7	1	1	0.2	0.567216062331435	1	Endothelial_cells	IGFBP7
Endothelial_cells__UBA6	1	1	0.2	0.567216062331435	1	Endothelial_cells	UBA6
Endothelial_cells__RUFY3	1	1	0.2	0.567216062331435	1	Endothelial_cells	RUFY3
Endothelial_cells__DCK	1	1	0.2	0.567216062331435	1	Endothelial_cells	DCK
Endothelial_cells__COX18	1	1	0.2	0.567216062331435	1	Endothelial_cells	COX18
Endothelial_cells__CXCL8	1	1	0.2	0.567216062331435	1	Endothelial_cells	CXCL8
Endothelial_cells__CXCL1	1	1	0.2	0.567216062331435	1	Endothelial_cells	CXCL1
Endothelial_cells__AREG	1	1	0.2	0.567216062331435	1	Endothelial_cells	AREG
Endothelial_cells__RCHY1	1	1	0.2	0.567216062331435	1	Endothelial_cells	RCHY1
Endothelial_cells__NUP54	1	1	0.2	0.567216062331435	1	Endothelial_cells	NUP54
Endothelial_cells__SCARB2	1	1	0.2	0.567216062331435	1	Endothelial_cells	SCARB2
Endothelial_cells__CNOT6L	1	1	0.2	0.567216062331435	1	Endothelial_cells	CNOT6L
Endothelial_cells__HNRNPD	1	1	0.2	0.567216062331435	1	Endothelial_cells	HNRNPD
Endothelial_cells__ENOPH1	1	1	0.2	0.567216062331435	1	Endothelial_cells	ENOPH1
Endothelial_cells__SEC31A	1	1	0.2	0.567216062331435	1	Endothelial_cells	SEC31A
Endothelial_cells__LIN54	1	1	0.2	0.567216062331435	1	Endothelial_cells	LIN54
Endothelial_cells__WDFY3	1	1	0.2	0.567216062331435	1	Endothelial_cells	WDFY3
Endothelial_cells__ARHGAP24	1	1	0.2	0.567216062331435	1	Endothelial_cells	ARHGAP24
Endothelial_cells__PTPN13	1	1	0.2	0.567216062331435	1	Endothelial_cells	PTPN13
Endothelial_cells__PPM1K	1	1	0.2	0.567216062331435	1	Endothelial_cells	PPM1K
Endothelial_cells__HERC6	1	1	0.2	0.567216062331435	1	Endothelial_cells	HERC6
Endothelial_cells__PYURF	1	1	0.2	0.567216062331435	1	Endothelial_cells	PYURF
Endothelial_cells__HERC3	1	1	0.2	0.567216062331435	1	Endothelial_cells	HERC3
Endothelial_cells__EIF4E	1	1	0.2	0.567216062331435	1	Endothelial_cells	EIF4E
Endothelial_cells__ADH5	1	1	0.2	0.567216062331435	1	Endothelial_cells	ADH5
Endothelial_cells__LAMTOR3	1	1	0.2	0.567216062331435	1	Endothelial_cells	LAMTOR3
Endothelial_cells__PPP3CA	1	1	0.2	0.567216062331435	1	Endothelial_cells	PPP3CA
Endothelial_cells__NFKB1	1	1	0.2	0.567216062331435	1	Endothelial_cells	NFKB1
Endothelial_cells__BDH2	1	1	0.2	0.567216062331435	1	Endothelial_cells	BDH2
Endothelial_cells__PPA2	1	1	0.2	0.567216062331435	1	Endothelial_cells	PPA2
Endothelial_cells__SGMS2	1	1	0.2	0.567216062331435	1	Endothelial_cells	SGMS2
Endothelial_cells__CYP2U1	1	1	0.2	0.567216062331435	1	Endothelial_cells	CYP2U1
Endothelial_cells__LEF1	1	1	0.2	0.567216062331435	1	Endothelial_cells	LEF1
Endothelial_cells__GAR1	1	1	0.2	0.567216062331435	1	Endothelial_cells	GAR1
Endothelial_cells__AP1AR	1	1	0.2	0.567216062331435	1	Endothelial_cells	AP1AR
Endothelial_cells__SEC24D	1	1	0.2	0.567216062331435	1	Endothelial_cells	SEC24D
Endothelial_cells__PDE5A	1	1	0.2	0.567216062331435	1	Endothelial_cells	PDE5A
Endothelial_cells__BBS7	1	1	0.2	0.567216062331435	1	Endothelial_cells	BBS7
Endothelial_cells__SPRY1	1	1	0.2	0.567216062331435	1	Endothelial_cells	SPRY1
Endothelial_cells__PGRMC2	1	1	0.2	0.567216062331435	1	Endothelial_cells	PGRMC2
Endothelial_cells__JADE1	1	1	0.2	0.567216062331435	1	Endothelial_cells	JADE1
Endothelial_cells__C4ORF33	1	1	0.2	0.567216062331435	1	Endothelial_cells	C4ORF33
Endothelial_cells__NAA15	1	1	0.2	0.567216062331435	1	Endothelial_cells	NAA15
Endothelial_cells__SETD7	1	1	0.2	0.567216062331435	1	Endothelial_cells	SETD7
Endothelial_cells__ZNF330	1	1	0.2	0.567216062331435	1	Endothelial_cells	ZNF330
Endothelial_cells__ANAPC10	1	1	0.2	0.567216062331435	1	Endothelial_cells	ANAPC10
Endothelial_cells__OTUD4	1	1	0.2	0.567216062331435	1	Endothelial_cells	OTUD4
Endothelial_cells__SMAD1	1	1	0.2	0.567216062331435	1	Endothelial_cells	SMAD1
Endothelial_cells__LSM6	1	1	0.2	0.567216062331435	1	Endothelial_cells	LSM6
Endothelial_cells__NR3C2	1	1	0.2	0.567216062331435	1	Endothelial_cells	NR3C2
Endothelial_cells__SH3D19	1	1	0.2	0.567216062331435	1	Endothelial_cells	SH3D19
Endothelial_cells__ARFIP1	1	1	0.2	0.567216062331435	1	Endothelial_cells	ARFIP1
Endothelial_cells__CTSO	1	1	0.2	0.567216062331435	1	Endothelial_cells	CTSO
Endothelial_cells__RAPGEF2	1	1	0.2	0.567216062331435	1	Endothelial_cells	RAPGEF2
Endothelial_cells__TMA16	1	1	0.2	0.567216062331435	1	Endothelial_cells	TMA16
Endothelial_cells__MSMO1	1	1	0.2	0.567216062331435	1	Endothelial_cells	MSMO1
Endothelial_cells__DDX60L	1	1	0.2	0.567216062331435	1	Endothelial_cells	DDX60L
Endothelial_cells__CBR4	1	1	0.2	0.567216062331435	1	Endothelial_cells	CBR4
Endothelial_cells__SH3RF1	1	1	0.2	0.567216062331435	1	Endothelial_cells	SH3RF1
Endothelial_cells__FBXO8	1	1	0.2	0.567216062331435	1	Endothelial_cells	FBXO8
Endothelial_cells__HPGD	1	1	0.2	0.567216062331435	1	Endothelial_cells	HPGD
Endothelial_cells__DCTD	1	1	0.2	0.567216062331435	1	Endothelial_cells	DCTD
Endothelial_cells__ING2	1	1	0.2	0.567216062331435	1	Endothelial_cells	ING2
Endothelial_cells__TRAPPC11	1	1	0.2	0.567216062331435	1	Endothelial_cells	TRAPPC11
Endothelial_cells__IRF2	1	1	0.2	0.567216062331435	1	Endothelial_cells	IRF2
Endothelial_cells__PRIMPOL	1	1	0.2	0.567216062331435	1	Endothelial_cells	PRIMPOL
Endothelial_cells__SLC25A4	1	1	0.2	0.567216062331435	1	Endothelial_cells	SLC25A4
Endothelial_cells__CFAP97	1	1	0.2	0.567216062331435	1	Endothelial_cells	CFAP97
Endothelial_cells__UFSP2	1	1	0.2	0.567216062331435	1	Endothelial_cells	UFSP2
Endothelial_cells__TLR3	1	1	0.2	0.567216062331435	1	Endothelial_cells	TLR3
Endothelial_cells__CYP4V2	1	1	0.2	0.567216062331435	1	Endothelial_cells	CYP4V2
Endothelial_cells__PDCD6	1	1	0.2	0.567216062331435	1	Endothelial_cells	PDCD6
Endothelial_cells__SLC12A7	1	1	0.2	0.567216062331435	1	Endothelial_cells	SLC12A7
Endothelial_cells__CLPTM1L	1	1	0.2	0.567216062331435	1	Endothelial_cells	CLPTM1L
Endothelial_cells__MED10	1	1	0.2	0.567216062331435	1	Endothelial_cells	MED10
Endothelial_cells__DAP	1	1	0.2	0.567216062331435	1	Endothelial_cells	DAP
Endothelial_cells__ANKH	1	1	0.2	0.567216062331435	1	Endothelial_cells	ANKH
Endothelial_cells__MYO10	1	1	0.2	0.567216062331435	1	Endothelial_cells	MYO10
Endothelial_cells__PDZD2	1	1	0.2	0.567216062331435	1	Endothelial_cells	PDZD2
Endothelial_cells__TARS	1	1	0.2	0.567216062331435	1	Endothelial_cells	TARS
Endothelial_cells__RAI14	1	1	0.2	0.567216062331435	1	Endothelial_cells	RAI14
Endothelial_cells__RAD1	1	1	0.2	0.567216062331435	1	Endothelial_cells	RAD1
Endothelial_cells__BRIX1	1	1	0.2	0.567216062331435	1	Endothelial_cells	BRIX1
Endothelial_cells__IL7R	1	1	0.2	0.567216062331435	1	Endothelial_cells	IL7R
Endothelial_cells__TTC33	1	1	0.2	0.567216062331435	1	Endothelial_cells	TTC33
Endothelial_cells__OXCT1	1	1	0.2	0.567216062331435	1	Endothelial_cells	OXCT1
Endothelial_cells__C5ORF51	1	1	0.2	0.567216062331435	1	Endothelial_cells	C5ORF51
Endothelial_cells__HMGCS1	1	1	0.2	0.567216062331435	1	Endothelial_cells	HMGCS1
Endothelial_cells__PARP8	1	1	0.2	0.567216062331435	1	Endothelial_cells	PARP8
Endothelial_cells__ITGA1	1	1	0.2	0.567216062331435	1	Endothelial_cells	ITGA1
Endothelial_cells__ITGA2	1	1	0.2	0.567216062331435	1	Endothelial_cells	ITGA2
Endothelial_cells__MOCS2	1	1	0.2	0.567216062331435	1	Endothelial_cells	MOCS2
Endothelial_cells__SNX18	1	1	0.2	0.567216062331435	1	Endothelial_cells	SNX18
Endothelial_cells__ESM1	1	1	0.2	0.567216062331435	1	Endothelial_cells	ESM1
Endothelial_cells__SLC38A9	1	1	0.2	0.567216062331435	1	Endothelial_cells	SLC38A9
Endothelial_cells__MIER3	1	1	0.2	0.567216062331435	1	Endothelial_cells	MIER3
Endothelial_cells__PLK2	1	1	0.2	0.567216062331435	1	Endothelial_cells	PLK2
Endothelial_cells__PDE4D	1	1	0.2	0.567216062331435	1	Endothelial_cells	PDE4D
Endothelial_cells__IPO11	1	1	0.2	0.567216062331435	1	Endothelial_cells	IPO11
Endothelial_cells__PPWD1	1	1	0.2	0.567216062331435	1	Endothelial_cells	PPWD1
Endothelial_cells__TRIM23	1	1	0.2	0.567216062331435	1	Endothelial_cells	TRIM23
Endothelial_cells__TRAPPC13	1	1	0.2	0.567216062331435	1	Endothelial_cells	TRAPPC13
Endothelial_cells__NLN	1	1	0.2	0.567216062331435	1	Endothelial_cells	NLN
Endothelial_cells__MAST4	1	1	0.2	0.567216062331435	1	Endothelial_cells	MAST4
Endothelial_cells__MARVELD2	1	1	0.2	0.567216062331435	1	Endothelial_cells	MARVELD2
Endothelial_cells__OCLN	1	1	0.2	0.567216062331435	1	Endothelial_cells	OCLN
Endothelial_cells__NAIP	1	1	0.2	0.567216062331435	1	Endothelial_cells	NAIP
Endothelial_cells__ARHGEF28	1	1	0.2	0.567216062331435	1	Endothelial_cells	ARHGEF28
Endothelial_cells__ENC1	1	1	0.2	0.567216062331435	1	Endothelial_cells	ENC1
Endothelial_cells__NSA2	1	1	0.2	0.567216062331435	1	Endothelial_cells	NSA2
Endothelial_cells__POLK	1	1	0.2	0.567216062331435	1	Endothelial_cells	POLK
Endothelial_cells__POC5	1	1	0.2	0.567216062331435	1	Endothelial_cells	POC5
Endothelial_cells__WDR41	1	1	0.2	0.567216062331435	1	Endothelial_cells	WDR41
Endothelial_cells__HOMER1	1	1	0.2	0.567216062331435	1	Endothelial_cells	HOMER1
Endothelial_cells__RASGRF2	1	1	0.2	0.567216062331435	1	Endothelial_cells	RASGRF2
Endothelial_cells__COX7C	1	1	0.2	0.567216062331435	1	Endothelial_cells	COX7C
Endothelial_cells__MEF2C	1	1	0.2	0.567216062331435	1	Endothelial_cells	MEF2C
Endothelial_cells__KIAA0825	1	1	0.2	0.567216062331435	1	Endothelial_cells	KIAA0825
Endothelial_cells__SLF1	1	1	0.2	0.567216062331435	1	Endothelial_cells	SLF1
Endothelial_cells__MCTP1	1	1	0.2	0.567216062331435	1	Endothelial_cells	MCTP1
Endothelial_cells__RHOBTB3	1	1	0.2	0.567216062331435	1	Endothelial_cells	RHOBTB3
Endothelial_cells__GLRX	1	1	0.2	0.567216062331435	1	Endothelial_cells	GLRX
Endothelial_cells__ERAP1	1	1	0.2	0.567216062331435	1	Endothelial_cells	ERAP1
Endothelial_cells__ERAP2	1	1	0.2	0.567216062331435	1	Endothelial_cells	ERAP2
Endothelial_cells__GIN1	1	1	0.2	0.567216062331435	1	Endothelial_cells	GIN1
Endothelial_cells__NUDT12	1	1	0.2	0.567216062331435	1	Endothelial_cells	NUDT12
Endothelial_cells__EFNA5	1	1	0.2	0.567216062331435	1	Endothelial_cells	EFNA5
Endothelial_cells__FBXL17	1	1	0.2	0.567216062331435	1	Endothelial_cells	FBXL17
Endothelial_cells__WDR36	1	1	0.2	0.567216062331435	1	Endothelial_cells	WDR36
Endothelial_cells__NREP	1	1	0.2	0.567216062331435	1	Endothelial_cells	NREP
Endothelial_cells__MCC	1	1	0.2	0.567216062331435	1	Endothelial_cells	MCC
Endothelial_cells__TMED7	1	1	0.2	0.567216062331435	1	Endothelial_cells	TMED7
Endothelial_cells__AP3S1	1	1	0.2	0.567216062331435	1	Endothelial_cells	AP3S1
Endothelial_cells__DMXL1	1	1	0.2	0.567216062331435	1	Endothelial_cells	DMXL1
Endothelial_cells__SNX2	1	1	0.2	0.567216062331435	1	Endothelial_cells	SNX2
Endothelial_cells__CEP120	1	1	0.2	0.567216062331435	1	Endothelial_cells	CEP120
Endothelial_cells__PHAX	1	1	0.2	0.567216062331435	1	Endothelial_cells	PHAX
Endothelial_cells__LMNB1	1	1	0.2	0.567216062331435	1	Endothelial_cells	LMNB1
Endothelial_cells__RAPGEF6	1	1	0.2	0.567216062331435	1	Endothelial_cells	RAPGEF6
Endothelial_cells__IRF1	1	1	0.2	0.567216062331435	1	Endothelial_cells	IRF1
Endothelial_cells__UQCRQ	1	1	0.2	0.567216062331435	1	Endothelial_cells	UQCRQ
Endothelial_cells__VDAC1	1	1	0.2	0.567216062331435	1	Endothelial_cells	VDAC1
Endothelial_cells__UBE2B	1	1	0.2	0.567216062331435	1	Endothelial_cells	UBE2B
Endothelial_cells__SAR1B	1	1	0.2	0.567216062331435	1	Endothelial_cells	SAR1B
Endothelial_cells__TXNDC15	1	1	0.2	0.567216062331435	1	Endothelial_cells	TXNDC15
Endothelial_cells__H2AFY	1	1	0.2	0.567216062331435	1	Endothelial_cells	H2AFY
Endothelial_cells__TGFBI	1	1	0.2	0.567216062331435	1	Endothelial_cells	TGFBI
Endothelial_cells__CDC23	1	1	0.2	0.567216062331435	1	Endothelial_cells	CDC23
Endothelial_cells__HSPA9	1	1	0.2	0.567216062331435	1	Endothelial_cells	HSPA9
Endothelial_cells__MZB1	1	1	0.2	0.567216062331435	1	Endothelial_cells	MZB1
Endothelial_cells__CXXC5	1	1	0.2	0.567216062331435	1	Endothelial_cells	CXXC5
Endothelial_cells__PFDN1	1	1	0.2	0.567216062331435	1	Endothelial_cells	PFDN1
Endothelial_cells__HBEGF	1	1	0.2	0.567216062331435	1	Endothelial_cells	HBEGF
Endothelial_cells__CD14	1	1	0.2	0.567216062331435	1	Endothelial_cells	CD14
Endothelial_cells__HARS2	1	1	0.2	0.567216062331435	1	Endothelial_cells	HARS2
Endothelial_cells__TAF7	1	1	0.2	0.567216062331435	1	Endothelial_cells	TAF7
Endothelial_cells__DIAPH1	1	1	0.2	0.567216062331435	1	Endothelial_cells	DIAPH1
Endothelial_cells__PCDH1	1	1	0.2	0.567216062331435	1	Endothelial_cells	PCDH1
Endothelial_cells__PCDH12	1	1	0.2	0.567216062331435	1	Endothelial_cells	PCDH12
Endothelial_cells__NDFIP1	1	1	0.2	0.567216062331435	1	Endothelial_cells	NDFIP1
Endothelial_cells__ARHGAP26	1	1	0.2	0.567216062331435	1	Endothelial_cells	ARHGAP26
Endothelial_cells__NR3C1	1	1	0.2	0.567216062331435	1	Endothelial_cells	NR3C1
Endothelial_cells__YIPF5	1	1	0.2	0.567216062331435	1	Endothelial_cells	YIPF5
Endothelial_cells__TCERG1	1	1	0.2	0.567216062331435	1	Endothelial_cells	TCERG1
Endothelial_cells__SCGB3A2	1	1	0.2	0.567216062331435	1	Endothelial_cells	SCGB3A2
Endothelial_cells__FBXO38	1	1	0.2	0.567216062331435	1	Endothelial_cells	FBXO38
Endothelial_cells__ADRB2	1	1	0.2	0.567216062331435	1	Endothelial_cells	ADRB2
Endothelial_cells__ABLIM3	1	1	0.2	0.567216062331435	1	Endothelial_cells	ABLIM3
Endothelial_cells__GRPEL2	1	1	0.2	0.567216062331435	1	Endothelial_cells	GRPEL2
Endothelial_cells__ARHGEF37	1	1	0.2	0.567216062331435	1	Endothelial_cells	ARHGEF37
Endothelial_cells__PPARGC1B	1	1	0.2	0.567216062331435	1	Endothelial_cells	PPARGC1B
Endothelial_cells__CD74	1	1	0.2	0.567216062331435	1	Endothelial_cells	CD74
Endothelial_cells__SYNPO	1	1	0.2	0.567216062331435	1	Endothelial_cells	SYNPO
Endothelial_cells__ANXA6	1	1	0.2	0.567216062331435	1	Endothelial_cells	ANXA6
Endothelial_cells__LARP1	1	1	0.2	0.567216062331435	1	Endothelial_cells	LARP1
Endothelial_cells__FAXDC2	1	1	0.2	0.567216062331435	1	Endothelial_cells	FAXDC2
Endothelial_cells__CNOT8	1	1	0.2	0.567216062331435	1	Endothelial_cells	CNOT8
Endothelial_cells__GEMIN5	1	1	0.2	0.567216062331435	1	Endothelial_cells	GEMIN5
Endothelial_cells__EBF1	1	1	0.2	0.567216062331435	1	Endothelial_cells	EBF1
Endothelial_cells__UBLCP1	1	1	0.2	0.567216062331435	1	Endothelial_cells	UBLCP1
Endothelial_cells__TTC1	1	1	0.2	0.567216062331435	1	Endothelial_cells	TTC1
Endothelial_cells__SH3PXD2B	1	1	0.2	0.567216062331435	1	Endothelial_cells	SH3PXD2B
Endothelial_cells__CPEB4	1	1	0.2	0.567216062331435	1	Endothelial_cells	CPEB4
Endothelial_cells__SIMC1	1	1	0.2	0.567216062331435	1	Endothelial_cells	SIMC1
Endothelial_cells__NOP16	1	1	0.2	0.567216062331435	1	Endothelial_cells	NOP16
Endothelial_cells__RNF44	1	1	0.2	0.567216062331435	1	Endothelial_cells	RNF44
Endothelial_cells__PRR7	1	1	0.2	0.567216062331435	1	Endothelial_cells	PRR7
Endothelial_cells__DBN1	1	1	0.2	0.567216062331435	1	Endothelial_cells	DBN1
Endothelial_cells__PDLIM7	1	1	0.2	0.567216062331435	1	Endothelial_cells	PDLIM7
Endothelial_cells__DDX41	1	1	0.2	0.567216062331435	1	Endothelial_cells	DDX41
Endothelial_cells__FAM193B	1	1	0.2	0.567216062331435	1	Endothelial_cells	FAM193B
Endothelial_cells__N4BP3	1	1	0.2	0.567216062331435	1	Endothelial_cells	N4BP3
Endothelial_cells__RMND5B	1	1	0.2	0.567216062331435	1	Endothelial_cells	RMND5B
Endothelial_cells__NHP2	1	1	0.2	0.567216062331435	1	Endothelial_cells	NHP2
Endothelial_cells__HNRNPAB	1	1	0.2	0.567216062331435	1	Endothelial_cells	HNRNPAB
Endothelial_cells__ZNF354A	1	1	0.2	0.567216062331435	1	Endothelial_cells	ZNF354A
Endothelial_cells__SCGB3A1	1	1	0.2	0.567216062331435	1	Endothelial_cells	SCGB3A1
Endothelial_cells__TRIM41	1	1	0.2	0.567216062331435	1	Endothelial_cells	TRIM41
Endothelial_cells__DUSP22	1	1	0.2	0.567216062331435	1	Endothelial_cells	DUSP22
Endothelial_cells__GMDS	1	1	0.2	0.567216062331435	1	Endothelial_cells	GMDS
Endothelial_cells__SERPINB1	1	1	0.2	0.567216062331435	1	Endothelial_cells	SERPINB1
Endothelial_cells__SERPINB9	1	1	0.2	0.567216062331435	1	Endothelial_cells	SERPINB9
Endothelial_cells__SERPINB6	1	1	0.2	0.567216062331435	1	Endothelial_cells	SERPINB6
Endothelial_cells__NQO2	1	1	0.2	0.567216062331435	1	Endothelial_cells	NQO2
Endothelial_cells__BPHL	1	1	0.2	0.567216062331435	1	Endothelial_cells	BPHL
Endothelial_cells__PSMG4	1	1	0.2	0.567216062331435	1	Endothelial_cells	PSMG4
Endothelial_cells__FARS2	1	1	0.2	0.567216062331435	1	Endothelial_cells	FARS2
Endothelial_cells__NRN1	1	1	0.2	0.567216062331435	1	Endothelial_cells	NRN1
Endothelial_cells__SSR1	1	1	0.2	0.567216062331435	1	Endothelial_cells	SSR1
Endothelial_cells__TXNDC5	1	1	0.2	0.567216062331435	1	Endothelial_cells	TXNDC5
Endothelial_cells__PAK1IP1	1	1	0.2	0.567216062331435	1	Endothelial_cells	PAK1IP1
Endothelial_cells__TMEM14B	1	1	0.2	0.567216062331435	1	Endothelial_cells	TMEM14B
Endothelial_cells__PHACTR1	1	1	0.2	0.567216062331435	1	Endothelial_cells	PHACTR1
Endothelial_cells__GFOD1	1	1	0.2	0.567216062331435	1	Endothelial_cells	GFOD1
Endothelial_cells__NOL7	1	1	0.2	0.567216062331435	1	Endothelial_cells	NOL7
Endothelial_cells__MCUR1	1	1	0.2	0.567216062331435	1	Endothelial_cells	MCUR1
Endothelial_cells__MYLIP	1	1	0.2	0.567216062331435	1	Endothelial_cells	MYLIP
Endothelial_cells__ATXN1	1	1	0.2	0.567216062331435	1	Endothelial_cells	ATXN1
Endothelial_cells__FAM8A1	1	1	0.2	0.567216062331435	1	Endothelial_cells	FAM8A1
Endothelial_cells__DEK	1	1	0.2	0.567216062331435	1	Endothelial_cells	DEK
Endothelial_cells__RNF144B	1	1	0.2	0.567216062331435	1	Endothelial_cells	RNF144B
Endothelial_cells__E2F3	1	1	0.2	0.567216062331435	1	Endothelial_cells	E2F3
Endothelial_cells__SOX4	1	1	0.2	0.567216062331435	1	Endothelial_cells	SOX4
Endothelial_cells__TRIM38	1	1	0.2	0.567216062331435	1	Endothelial_cells	TRIM38
Endothelial_cells__HIST1H2AC	1	1	0.2	0.567216062331435	1	Endothelial_cells	HIST1H2AC
Endothelial_cells__BTN3A3	1	1	0.2	0.567216062331435	1	Endothelial_cells	BTN3A3
Endothelial_cells__BTN2A1	1	1	0.2	0.567216062331435	1	Endothelial_cells	BTN2A1
Endothelial_cells__ZNF184	1	1	0.2	0.567216062331435	1	Endothelial_cells	ZNF184
Endothelial_cells__ZSCAN9	1	1	0.2	0.567216062331435	1	Endothelial_cells	ZSCAN9
Endothelial_cells__PGBD1	1	1	0.2	0.567216062331435	1	Endothelial_cells	PGBD1
Endothelial_cells__ZSCAN31	1	1	0.2	0.567216062331435	1	Endothelial_cells	ZSCAN31
Endothelial_cells__ZNRD1	1	1	0.2	0.567216062331435	1	Endothelial_cells	ZNRD1
Endothelial_cells__ABCF1	1	1	0.2	0.567216062331435	1	Endothelial_cells	ABCF1
Endothelial_cells__PPP1R10	1	1	0.2	0.567216062331435	1	Endothelial_cells	PPP1R10
Endothelial_cells__ATAT1	1	1	0.2	0.567216062331435	1	Endothelial_cells	ATAT1
Endothelial_cells__MDC1	1	1	0.2	0.567216062331435	1	Endothelial_cells	MDC1
Endothelial_cells__IER3	1	1	0.2	0.567216062331435	1	Endothelial_cells	IER3
Endothelial_cells__C6ORF47	1	1	0.2	0.567216062331435	1	Endothelial_cells	C6ORF47
Endothelial_cells__VARS	1	1	0.2	0.567216062331435	1	Endothelial_cells	VARS
Endothelial_cells__NELFE	1	1	0.2	0.567216062331435	1	Endothelial_cells	NELFE
Endothelial_cells__DXO	1	1	0.2	0.567216062331435	1	Endothelial_cells	DXO
Endothelial_cells__ATF6B	1	1	0.2	0.567216062331435	1	Endothelial_cells	ATF6B
Endothelial_cells__PPT2	1	1	0.2	0.567216062331435	1	Endothelial_cells	PPT2
Endothelial_cells__AGER	1	1	0.2	0.567216062331435	1	Endothelial_cells	AGER
Endothelial_cells__PBX2	1	1	0.2	0.567216062331435	1	Endothelial_cells	PBX2
Endothelial_cells__TAP1	1	1	0.2	0.567216062331435	1	Endothelial_cells	TAP1
Endothelial_cells__BRD2	1	1	0.2	0.567216062331435	1	Endothelial_cells	BRD2
Endothelial_cells__RXRB	1	1	0.2	0.567216062331435	1	Endothelial_cells	RXRB
Endothelial_cells__RING1	1	1	0.2	0.567216062331435	1	Endothelial_cells	RING1
Endothelial_cells__B3GALT4	1	1	0.2	0.567216062331435	1	Endothelial_cells	B3GALT4
Endothelial_cells__WDR46	1	1	0.2	0.567216062331435	1	Endothelial_cells	WDR46
Endothelial_cells__DAXX	1	1	0.2	0.567216062331435	1	Endothelial_cells	DAXX
Endothelial_cells__CUTA	1	1	0.2	0.567216062331435	1	Endothelial_cells	CUTA
Endothelial_cells__SYNGAP1	1	1	0.2	0.567216062331435	1	Endothelial_cells	SYNGAP1
Endothelial_cells__ANKS1A	1	1	0.2	0.567216062331435	1	Endothelial_cells	ANKS1A
Endothelial_cells__FKBP5	1	1	0.2	0.567216062331435	1	Endothelial_cells	FKBP5
Endothelial_cells__STK38	1	1	0.2	0.567216062331435	1	Endothelial_cells	STK38
Endothelial_cells__CPNE5	1	1	0.2	0.567216062331435	1	Endothelial_cells	CPNE5
Endothelial_cells__C6ORF89	1	1	0.2	0.567216062331435	1	Endothelial_cells	C6ORF89
Endothelial_cells__RNF8	1	1	0.2	0.567216062331435	1	Endothelial_cells	RNF8
Endothelial_cells__ZFAND3	1	1	0.2	0.567216062331435	1	Endothelial_cells	ZFAND3
Endothelial_cells__GLO1	1	1	0.2	0.567216062331435	1	Endothelial_cells	GLO1
Endothelial_cells__SAYSD1	1	1	0.2	0.567216062331435	1	Endothelial_cells	SAYSD1
Endothelial_cells__OARD1	1	1	0.2	0.567216062331435	1	Endothelial_cells	OARD1
Endothelial_cells__TFEB	1	1	0.2	0.567216062331435	1	Endothelial_cells	TFEB
Endothelial_cells__BYSL	1	1	0.2	0.567216062331435	1	Endothelial_cells	BYSL
Endothelial_cells__CCND3	1	1	0.2	0.567216062331435	1	Endothelial_cells	CCND3
Endothelial_cells__CNPY3	1	1	0.2	0.567216062331435	1	Endothelial_cells	CNPY3
Endothelial_cells__PPP2R5D	1	1	0.2	0.567216062331435	1	Endothelial_cells	PPP2R5D
Endothelial_cells__RRP36	1	1	0.2	0.567216062331435	1	Endothelial_cells	RRP36
Endothelial_cells__PTK7	1	1	0.2	0.567216062331435	1	Endothelial_cells	PTK7
Endothelial_cells__DNPH1	1	1	0.2	0.567216062331435	1	Endothelial_cells	DNPH1
Endothelial_cells__ZNF318	1	1	0.2	0.567216062331435	1	Endothelial_cells	ZNF318
Endothelial_cells__POLR1C	1	1	0.2	0.567216062331435	1	Endothelial_cells	POLR1C
Endothelial_cells__TMEM63B	1	1	0.2	0.567216062331435	1	Endothelial_cells	TMEM63B
Endothelial_cells__SLC29A1	1	1	0.2	0.567216062331435	1	Endothelial_cells	SLC29A1
Endothelial_cells__HSP90AB1	1	1	0.2	0.567216062331435	1	Endothelial_cells	HSP90AB1
Endothelial_cells__SLC35B2	1	1	0.2	0.567216062331435	1	Endothelial_cells	SLC35B2
Endothelial_cells__NFKBIE	1	1	0.2	0.567216062331435	1	Endothelial_cells	NFKBIE
Endothelial_cells__SUPT3H	1	1	0.2	0.567216062331435	1	Endothelial_cells	SUPT3H
Endothelial_cells__CLIC5	1	1	0.2	0.567216062331435	1	Endothelial_cells	CLIC5
Endothelial_cells__CENPQ	1	1	0.2	0.567216062331435	1	Endothelial_cells	CENPQ
Endothelial_cells__TRAM2	1	1	0.2	0.567216062331435	1	Endothelial_cells	TRAM2
Endothelial_cells__TMEM14A	1	1	0.2	0.567216062331435	1	Endothelial_cells	TMEM14A
Endothelial_cells__SLC17A5	1	1	0.2	0.567216062331435	1	Endothelial_cells	SLC17A5
Endothelial_cells__CD109	1	1	0.2	0.567216062331435	1	Endothelial_cells	CD109
Endothelial_cells__MYO6	1	1	0.2	0.567216062331435	1	Endothelial_cells	MYO6
Endothelial_cells__PHIP	1	1	0.2	0.567216062331435	1	Endothelial_cells	PHIP
Endothelial_cells__SH3BGRL2	1	1	0.2	0.567216062331435	1	Endothelial_cells	SH3BGRL2
Endothelial_cells__TPBG	1	1	0.2	0.567216062331435	1	Endothelial_cells	TPBG
Endothelial_cells__UBE3D	1	1	0.2	0.567216062331435	1	Endothelial_cells	UBE3D
Endothelial_cells__CYB5R4	1	1	0.2	0.567216062331435	1	Endothelial_cells	CYB5R4
Endothelial_cells__NT5E	1	1	0.2	0.567216062331435	1	Endothelial_cells	NT5E
Endothelial_cells__SYNCRIP	1	1	0.2	0.567216062331435	1	Endothelial_cells	SYNCRIP
Endothelial_cells__SMIM8	1	1	0.2	0.567216062331435	1	Endothelial_cells	SMIM8
Endothelial_cells__RARS2	1	1	0.2	0.567216062331435	1	Endothelial_cells	RARS2
Endothelial_cells__ORC3	1	1	0.2	0.567216062331435	1	Endothelial_cells	ORC3
Endothelial_cells__MDN1	1	1	0.2	0.567216062331435	1	Endothelial_cells	MDN1
Endothelial_cells__BACH2	1	1	0.2	0.567216062331435	1	Endothelial_cells	BACH2
Endothelial_cells__MANEA	1	1	0.2	0.567216062331435	1	Endothelial_cells	MANEA
Endothelial_cells__UFL1	1	1	0.2	0.567216062331435	1	Endothelial_cells	UFL1
Endothelial_cells__FBXL4	1	1	0.2	0.567216062331435	1	Endothelial_cells	FBXL4
Endothelial_cells__PREP	1	1	0.2	0.567216062331435	1	Endothelial_cells	PREP
Endothelial_cells__QRSL1	1	1	0.2	0.567216062331435	1	Endothelial_cells	QRSL1
Endothelial_cells__CD24	1	1	0.2	0.567216062331435	1	Endothelial_cells	CD24
Endothelial_cells__PDSS2	1	1	0.2	0.567216062331435	1	Endothelial_cells	PDSS2
Endothelial_cells__SOBP	1	1	0.2	0.567216062331435	1	Endothelial_cells	SOBP
Endothelial_cells__SEC63	1	1	0.2	0.567216062331435	1	Endothelial_cells	SEC63
Endothelial_cells__OSTM1	1	1	0.2	0.567216062331435	1	Endothelial_cells	OSTM1
Endothelial_cells__SNX3	1	1	0.2	0.567216062331435	1	Endothelial_cells	SNX3
Endothelial_cells__FOXO3	1	1	0.2	0.567216062331435	1	Endothelial_cells	FOXO3
Endothelial_cells__SESN1	1	1	0.2	0.567216062331435	1	Endothelial_cells	SESN1
Endothelial_cells__AK9	1	1	0.2	0.567216062331435	1	Endothelial_cells	AK9
Endothelial_cells__AMD1	1	1	0.2	0.567216062331435	1	Endothelial_cells	AMD1
Endothelial_cells__FYN	1	1	0.2	0.567216062331435	1	Endothelial_cells	FYN
Endothelial_cells__TUBE1	1	1	0.2	0.567216062331435	1	Endothelial_cells	TUBE1
Endothelial_cells__TSPYL4	1	1	0.2	0.567216062331435	1	Endothelial_cells	TSPYL4
Endothelial_cells__DSE	1	1	0.2	0.567216062331435	1	Endothelial_cells	DSE
Endothelial_cells__KPNA5	1	1	0.2	0.567216062331435	1	Endothelial_cells	KPNA5
Endothelial_cells__DCBLD1	1	1	0.2	0.567216062331435	1	Endothelial_cells	DCBLD1
Endothelial_cells__ASF1A	1	1	0.2	0.567216062331435	1	Endothelial_cells	ASF1A
Endothelial_cells__SERINC1	1	1	0.2	0.567216062331435	1	Endothelial_cells	SERINC1
Endothelial_cells__SMPDL3A	1	1	0.2	0.567216062331435	1	Endothelial_cells	SMPDL3A
Endothelial_cells__RNF217	1	1	0.2	0.567216062331435	1	Endothelial_cells	RNF217
Endothelial_cells__TPD52L1	1	1	0.2	0.567216062331435	1	Endothelial_cells	TPD52L1
Endothelial_cells__HINT3	1	1	0.2	0.567216062331435	1	Endothelial_cells	HINT3
Endothelial_cells__RNF146	1	1	0.2	0.567216062331435	1	Endothelial_cells	RNF146
Endothelial_cells__PTPRK	1	1	0.2	0.567216062331435	1	Endothelial_cells	PTPRK
Endothelial_cells__ARHGAP18	1	1	0.2	0.567216062331435	1	Endothelial_cells	ARHGAP18
Endothelial_cells__EPB41L2	1	1	0.2	0.567216062331435	1	Endothelial_cells	EPB41L2
Endothelial_cells__AKAP7	1	1	0.2	0.567216062331435	1	Endothelial_cells	AKAP7
Endothelial_cells__MED23	1	1	0.2	0.567216062331435	1	Endothelial_cells	MED23
Endothelial_cells__TBPL1	1	1	0.2	0.567216062331435	1	Endothelial_cells	TBPL1
Endothelial_cells__SGK1	1	1	0.2	0.567216062331435	1	Endothelial_cells	SGK1
Endothelial_cells__AHI1	1	1	0.2	0.567216062331435	1	Endothelial_cells	AHI1
Endothelial_cells__PDE7B	1	1	0.2	0.567216062331435	1	Endothelial_cells	PDE7B
Endothelial_cells__MAP7	1	1	0.2	0.567216062331435	1	Endothelial_cells	MAP7
Endothelial_cells__MAP3K5	1	1	0.2	0.567216062331435	1	Endothelial_cells	MAP3K5
Endothelial_cells__IFNGR1	1	1	0.2	0.567216062331435	1	Endothelial_cells	IFNGR1
Endothelial_cells__HEBP2	1	1	0.2	0.567216062331435	1	Endothelial_cells	HEBP2
Endothelial_cells__NHSL1	1	1	0.2	0.567216062331435	1	Endothelial_cells	NHSL1
Endothelial_cells__ABRACL	1	1	0.2	0.567216062331435	1	Endothelial_cells	ABRACL
Endothelial_cells__CITED2	1	1	0.2	0.567216062331435	1	Endothelial_cells	CITED2
Endothelial_cells__HIVEP2	1	1	0.2	0.567216062331435	1	Endothelial_cells	HIVEP2
Endothelial_cells__AIG1	1	1	0.2	0.567216062331435	1	Endothelial_cells	AIG1
Endothelial_cells__ADAT2	1	1	0.2	0.567216062331435	1	Endothelial_cells	ADAT2
Endothelial_cells__PEX3	1	1	0.2	0.567216062331435	1	Endothelial_cells	PEX3
Endothelial_cells__FUCA2	1	1	0.2	0.567216062331435	1	Endothelial_cells	FUCA2
Endothelial_cells__PHACTR2	1	1	0.2	0.567216062331435	1	Endothelial_cells	PHACTR2
Endothelial_cells__LTV1	1	1	0.2	0.567216062331435	1	Endothelial_cells	LTV1
Endothelial_cells__PLAGL1	1	1	0.2	0.567216062331435	1	Endothelial_cells	PLAGL1
Endothelial_cells__STX11	1	1	0.2	0.567216062331435	1	Endothelial_cells	STX11
Endothelial_cells__SASH1	1	1	0.2	0.567216062331435	1	Endothelial_cells	SASH1
Endothelial_cells__GINM1	1	1	0.2	0.567216062331435	1	Endothelial_cells	GINM1
Endothelial_cells__KATNA1	1	1	0.2	0.567216062331435	1	Endothelial_cells	KATNA1
Endothelial_cells__LATS1	1	1	0.2	0.567216062331435	1	Endothelial_cells	LATS1
Endothelial_cells__PCMT1	1	1	0.2	0.567216062331435	1	Endothelial_cells	PCMT1
Endothelial_cells__PLEKHG1	1	1	0.2	0.567216062331435	1	Endothelial_cells	PLEKHG1
Endothelial_cells__MTHFD1L	1	1	0.2	0.567216062331435	1	Endothelial_cells	MTHFD1L
Endothelial_cells__ARMT1	1	1	0.2	0.567216062331435	1	Endothelial_cells	ARMT1
Endothelial_cells__SYNE1	1	1	0.2	0.567216062331435	1	Endothelial_cells	SYNE1
Endothelial_cells__MTRF1L	1	1	0.2	0.567216062331435	1	Endothelial_cells	MTRF1L
Endothelial_cells__TFB1M	1	1	0.2	0.567216062331435	1	Endothelial_cells	TFB1M
Endothelial_cells__SNX9	1	1	0.2	0.567216062331435	1	Endothelial_cells	SNX9
Endothelial_cells__SYNJ2	1	1	0.2	0.567216062331435	1	Endothelial_cells	SYNJ2
Endothelial_cells__EZR	1	1	0.2	0.567216062331435	1	Endothelial_cells	EZR
Endothelial_cells__ACAT2	1	1	0.2	0.567216062331435	1	Endothelial_cells	ACAT2
Endothelial_cells__QKI	1	1	0.2	0.567216062331435	1	Endothelial_cells	QKI
Endothelial_cells__SFT2D1	1	1	0.2	0.567216062331435	1	Endothelial_cells	SFT2D1
Endothelial_cells__MPC1	1	1	0.2	0.567216062331435	1	Endothelial_cells	MPC1
Endothelial_cells__PHF10	1	1	0.2	0.567216062331435	1	Endothelial_cells	PHF10
Endothelial_cells__MICALL2	1	1	0.2	0.567216062331435	1	Endothelial_cells	MICALL2
Endothelial_cells__BRAT1	1	1	0.2	0.567216062331435	1	Endothelial_cells	BRAT1
Endothelial_cells__IQCE	1	1	0.2	0.567216062331435	1	Endothelial_cells	IQCE
Endothelial_cells__TTYH3	1	1	0.2	0.567216062331435	1	Endothelial_cells	TTYH3
Endothelial_cells__GNA12	1	1	0.2	0.567216062331435	1	Endothelial_cells	GNA12
Endothelial_cells__AP5Z1	1	1	0.2	0.567216062331435	1	Endothelial_cells	AP5Z1
Endothelial_cells__WIPI2	1	1	0.2	0.567216062331435	1	Endothelial_cells	WIPI2
Endothelial_cells__FSCN1	1	1	0.2	0.567216062331435	1	Endothelial_cells	FSCN1
Endothelial_cells__ZNF316	1	1	0.2	0.567216062331435	1	Endothelial_cells	ZNF316
Endothelial_cells__ZNF12	1	1	0.2	0.567216062331435	1	Endothelial_cells	ZNF12
Endothelial_cells__C1GALT1	1	1	0.2	0.567216062331435	1	Endothelial_cells	C1GALT1
Endothelial_cells__UMAD1	1	1	0.2	0.567216062331435	1	Endothelial_cells	UMAD1
Endothelial_cells__TMEM106B	1	1	0.2	0.567216062331435	1	Endothelial_cells	TMEM106B
Endothelial_cells__ARL4A	1	1	0.2	0.567216062331435	1	Endothelial_cells	ARL4A
Endothelial_cells__ANKMY2	1	1	0.2	0.567216062331435	1	Endothelial_cells	ANKMY2
Endothelial_cells__BZW2	1	1	0.2	0.567216062331435	1	Endothelial_cells	BZW2
Endothelial_cells__TSPAN13	1	1	0.2	0.567216062331435	1	Endothelial_cells	TSPAN13
Endothelial_cells__AHR	1	1	0.2	0.567216062331435	1	Endothelial_cells	AHR
Endothelial_cells__HDAC9	1	1	0.2	0.567216062331435	1	Endothelial_cells	HDAC9
Endothelial_cells__CDCA7L	1	1	0.2	0.567216062331435	1	Endothelial_cells	CDCA7L
Endothelial_cells__IL6	1	1	0.2	0.567216062331435	1	Endothelial_cells	IL6
Endothelial_cells__FAM126A	1	1	0.2	0.567216062331435	1	Endothelial_cells	FAM126A
Endothelial_cells__FAM221A	1	1	0.2	0.567216062331435	1	Endothelial_cells	FAM221A
Endothelial_cells__HNRNPA2B1	1	1	0.2	0.567216062331435	1	Endothelial_cells	HNRNPA2B1
Endothelial_cells__CBX3	1	1	0.2	0.567216062331435	1	Endothelial_cells	CBX3
Endothelial_cells__HIBADH	1	1	0.2	0.567216062331435	1	Endothelial_cells	HIBADH
Endothelial_cells__JAZF1	1	1	0.2	0.567216062331435	1	Endothelial_cells	JAZF1
Endothelial_cells__CPVL	1	1	0.2	0.567216062331435	1	Endothelial_cells	CPVL
Endothelial_cells__FKBP14	1	1	0.2	0.567216062331435	1	Endothelial_cells	FKBP14
Endothelial_cells__MTURN	1	1	0.2	0.567216062331435	1	Endothelial_cells	MTURN
Endothelial_cells__GGCT	1	1	0.2	0.567216062331435	1	Endothelial_cells	GGCT
Endothelial_cells__GARS	1	1	0.2	0.567216062331435	1	Endothelial_cells	GARS
Endothelial_cells__INMT	1	1	0.2	0.567216062331435	1	Endothelial_cells	INMT
Endothelial_cells__KBTBD2	1	1	0.2	0.567216062331435	1	Endothelial_cells	KBTBD2
Endothelial_cells__NT5C3A	1	1	0.2	0.567216062331435	1	Endothelial_cells	NT5C3A
Endothelial_cells__EEPD1	1	1	0.2	0.567216062331435	1	Endothelial_cells	EEPD1
Endothelial_cells__ELMO1	1	1	0.2	0.567216062331435	1	Endothelial_cells	ELMO1
Endothelial_cells__VPS41	1	1	0.2	0.567216062331435	1	Endothelial_cells	VPS41
Endothelial_cells__RALA	1	1	0.2	0.567216062331435	1	Endothelial_cells	RALA
Endothelial_cells__STK17A	1	1	0.2	0.567216062331435	1	Endothelial_cells	STK17A
Endothelial_cells__DBNL	1	1	0.2	0.567216062331435	1	Endothelial_cells	DBNL
Endothelial_cells__AEBP1	1	1	0.2	0.567216062331435	1	Endothelial_cells	AEBP1
Endothelial_cells__POLD2	1	1	0.2	0.567216062331435	1	Endothelial_cells	POLD2
Endothelial_cells__DDX56	1	1	0.2	0.567216062331435	1	Endothelial_cells	DDX56
Endothelial_cells__PPIA	1	1	0.2	0.567216062331435	1	Endothelial_cells	PPIA
Endothelial_cells__TBRG4	1	1	0.2	0.567216062331435	1	Endothelial_cells	TBRG4
Endothelial_cells__IGFBP3	1	1	0.2	0.567216062331435	1	Endothelial_cells	IGFBP3
Endothelial_cells__TNS3	1	1	0.2	0.567216062331435	1	Endothelial_cells	TNS3
Endothelial_cells__UPP1	1	1	0.2	0.567216062331435	1	Endothelial_cells	UPP1
Endothelial_cells__GRB10	1	1	0.2	0.567216062331435	1	Endothelial_cells	GRB10
Endothelial_cells__SEC61G	1	1	0.2	0.567216062331435	1	Endothelial_cells	SEC61G
Endothelial_cells__ASL	1	1	0.2	0.567216062331435	1	Endothelial_cells	ASL
Endothelial_cells__SBDS	1	1	0.2	0.567216062331435	1	Endothelial_cells	SBDS
Endothelial_cells__AUTS2	1	1	0.2	0.567216062331435	1	Endothelial_cells	AUTS2
Endothelial_cells__BCL7B	1	1	0.2	0.567216062331435	1	Endothelial_cells	BCL7B
Endothelial_cells__CLIP2	1	1	0.2	0.567216062331435	1	Endothelial_cells	CLIP2
Endothelial_cells__HSPB1	1	1	0.2	0.567216062331435	1	Endothelial_cells	HSPB1
Endothelial_cells__YWHAG	1	1	0.2	0.567216062331435	1	Endothelial_cells	YWHAG
Endothelial_cells__CD36	1	1	0.2	0.567216062331435	1	Endothelial_cells	CD36
Endothelial_cells__SEMA3A	1	1	0.2	0.567216062331435	1	Endothelial_cells	SEMA3A
Endothelial_cells__KIAA1324L	1	1	0.2	0.567216062331435	1	Endothelial_cells	KIAA1324L
Endothelial_cells__TMEM243	1	1	0.2	0.567216062331435	1	Endothelial_cells	TMEM243
Endothelial_cells__CROT	1	1	0.2	0.567216062331435	1	Endothelial_cells	CROT
Endothelial_cells__ABCB1	1	1	0.2	0.567216062331435	1	Endothelial_cells	ABCB1
Endothelial_cells__RUNDC3B	1	1	0.2	0.567216062331435	1	Endothelial_cells	RUNDC3B
Endothelial_cells__DBF4	1	1	0.2	0.567216062331435	1	Endothelial_cells	DBF4
Endothelial_cells__SRI	1	1	0.2	0.567216062331435	1	Endothelial_cells	SRI
Endothelial_cells__GTPBP10	1	1	0.2	0.567216062331435	1	Endothelial_cells	GTPBP10
Endothelial_cells__CDK14	1	1	0.2	0.567216062331435	1	Endothelial_cells	CDK14
Endothelial_cells__MTERF1	1	1	0.2	0.567216062331435	1	Endothelial_cells	MTERF1
Endothelial_cells__GATAD1	1	1	0.2	0.567216062331435	1	Endothelial_cells	GATAD1
Endothelial_cells__SAMD9	1	1	0.2	0.567216062331435	1	Endothelial_cells	SAMD9
Endothelial_cells__VPS50	1	1	0.2	0.567216062331435	1	Endothelial_cells	VPS50
Endothelial_cells__CASD1	1	1	0.2	0.567216062331435	1	Endothelial_cells	CASD1
Endothelial_cells__PON2	1	1	0.2	0.567216062331435	1	Endothelial_cells	PON2
Endothelial_cells__PDK4	1	1	0.2	0.567216062331435	1	Endothelial_cells	PDK4
Endothelial_cells__TECPR1	1	1	0.2	0.567216062331435	1	Endothelial_cells	TECPR1
Endothelial_cells__BRI3	1	1	0.2	0.567216062331435	1	Endothelial_cells	BRI3
Endothelial_cells__BAIAP2L1	1	1	0.2	0.567216062331435	1	Endothelial_cells	BAIAP2L1
Endothelial_cells__SMURF1	1	1	0.2	0.567216062331435	1	Endothelial_cells	SMURF1
Endothelial_cells__ZNF394	1	1	0.2	0.567216062331435	1	Endothelial_cells	ZNF394
Endothelial_cells__ZNF655	1	1	0.2	0.567216062331435	1	Endothelial_cells	ZNF655
Endothelial_cells__CYP3A5	1	1	0.2	0.567216062331435	1	Endothelial_cells	CYP3A5
Endothelial_cells__TRIM4	1	1	0.2	0.567216062331435	1	Endothelial_cells	TRIM4
Endothelial_cells__ZKSCAN1	1	1	0.2	0.567216062331435	1	Endothelial_cells	ZKSCAN1
Endothelial_cells__MOSPD3	1	1	0.2	0.567216062331435	1	Endothelial_cells	MOSPD3
Endothelial_cells__GIGYF1	1	1	0.2	0.567216062331435	1	Endothelial_cells	GIGYF1
Endothelial_cells__TRIM56	1	1	0.2	0.567216062331435	1	Endothelial_cells	TRIM56
Endothelial_cells__AP1S1	1	1	0.2	0.567216062331435	1	Endothelial_cells	AP1S1
Endothelial_cells__CLDN15	1	1	0.2	0.567216062331435	1	Endothelial_cells	CLDN15
Endothelial_cells__LRWD1	1	1	0.2	0.567216062331435	1	Endothelial_cells	LRWD1
Endothelial_cells__RASA4	1	1	0.2	0.567216062331435	1	Endothelial_cells	RASA4
Endothelial_cells__DNAJC2	1	1	0.2	0.567216062331435	1	Endothelial_cells	DNAJC2
Endothelial_cells__ORC5	1	1	0.2	0.567216062331435	1	Endothelial_cells	ORC5
Endothelial_cells__RINT1	1	1	0.2	0.567216062331435	1	Endothelial_cells	RINT1
Endothelial_cells__SYPL1	1	1	0.2	0.567216062331435	1	Endothelial_cells	SYPL1
Endothelial_cells__BCAP29	1	1	0.2	0.567216062331435	1	Endothelial_cells	BCAP29
Endothelial_cells__IMMP2L	1	1	0.2	0.567216062331435	1	Endothelial_cells	IMMP2L
Endothelial_cells__TES	1	1	0.2	0.567216062331435	1	Endothelial_cells	TES
Endothelial_cells__CAPZA2	1	1	0.2	0.567216062331435	1	Endothelial_cells	CAPZA2
Endothelial_cells__AASS	1	1	0.2	0.567216062331435	1	Endothelial_cells	AASS
Endothelial_cells__NDUFA5	1	1	0.2	0.567216062331435	1	Endothelial_cells	NDUFA5
Endothelial_cells__IMPDH1	1	1	0.2	0.567216062331435	1	Endothelial_cells	IMPDH1
Endothelial_cells__CALU	1	1	0.2	0.567216062331435	1	Endothelial_cells	CALU
Endothelial_cells__NRF1	1	1	0.2	0.567216062331435	1	Endothelial_cells	NRF1
Endothelial_cells__CEP41	1	1	0.2	0.567216062331435	1	Endothelial_cells	CEP41
Endothelial_cells__MKLN1	1	1	0.2	0.567216062331435	1	Endothelial_cells	MKLN1
Endothelial_cells__AKR1B1	1	1	0.2	0.567216062331435	1	Endothelial_cells	AKR1B1
Endothelial_cells__BPGM	1	1	0.2	0.567216062331435	1	Endothelial_cells	BPGM
Endothelial_cells__TMEM140	1	1	0.2	0.567216062331435	1	Endothelial_cells	TMEM140
Endothelial_cells__CNOT4	1	1	0.2	0.567216062331435	1	Endothelial_cells	CNOT4
Endothelial_cells__MTPN	1	1	0.2	0.567216062331435	1	Endothelial_cells	MTPN
Endothelial_cells__CREB3L2	1	1	0.2	0.567216062331435	1	Endothelial_cells	CREB3L2
Endothelial_cells__ZC3HAV1	1	1	0.2	0.567216062331435	1	Endothelial_cells	ZC3HAV1
Endothelial_cells__UBN2	1	1	0.2	0.567216062331435	1	Endothelial_cells	UBN2
Endothelial_cells__HIPK2	1	1	0.2	0.567216062331435	1	Endothelial_cells	HIPK2
Endothelial_cells__TBXAS1	1	1	0.2	0.567216062331435	1	Endothelial_cells	TBXAS1
Endothelial_cells__PARP12	1	1	0.2	0.567216062331435	1	Endothelial_cells	PARP12
Endothelial_cells__KDM7A	1	1	0.2	0.567216062331435	1	Endothelial_cells	KDM7A
Endothelial_cells__MKRN1	1	1	0.2	0.567216062331435	1	Endothelial_cells	MKRN1
Endothelial_cells__ADCK2	1	1	0.2	0.567216062331435	1	Endothelial_cells	ADCK2
Endothelial_cells__NDUFB2	1	1	0.2	0.567216062331435	1	Endothelial_cells	NDUFB2
Endothelial_cells__GSTK1	1	1	0.2	0.567216062331435	1	Endothelial_cells	GSTK1
Endothelial_cells__CASP2	1	1	0.2	0.567216062331435	1	Endothelial_cells	CASP2
Endothelial_cells__ZYX	1	1	0.2	0.567216062331435	1	Endothelial_cells	ZYX
Endothelial_cells__ZNF467	1	1	0.2	0.567216062331435	1	Endothelial_cells	ZNF467
Endothelial_cells__GIMAP8	1	1	0.2	0.567216062331435	1	Endothelial_cells	GIMAP8
Endothelial_cells__GIMAP6	1	1	0.2	0.567216062331435	1	Endothelial_cells	GIMAP6
Endothelial_cells__GIMAP5	1	1	0.2	0.567216062331435	1	Endothelial_cells	GIMAP5
Endothelial_cells__NOS3	1	1	0.2	0.567216062331435	1	Endothelial_cells	NOS3
Endothelial_cells__ABCB8	1	1	0.2	0.567216062331435	1	Endothelial_cells	ABCB8
Endothelial_cells__TMUB1	1	1	0.2	0.567216062331435	1	Endothelial_cells	TMUB1
Endothelial_cells__PRKAG2	1	1	0.2	0.567216062331435	1	Endothelial_cells	PRKAG2
Endothelial_cells__INSIG1	1	1	0.2	0.567216062331435	1	Endothelial_cells	INSIG1
Endothelial_cells__UBE3C	1	1	0.2	0.567216062331435	1	Endothelial_cells	UBE3C
Endothelial_cells__DNAJB6	1	1	0.2	0.567216062331435	1	Endothelial_cells	DNAJB6
Endothelial_cells__ESYT2	1	1	0.2	0.567216062331435	1	Endothelial_cells	ESYT2
Endothelial_cells__GTPBP6	1	1	0.2	0.567216062331435	1	Endothelial_cells	GTPBP6
Endothelial_cells__SLC25A6	1	1	0.2	0.567216062331435	1	Endothelial_cells	SLC25A6
Endothelial_cells__ASMTL	1	1	0.2	0.567216062331435	1	Endothelial_cells	ASMTL
Endothelial_cells__DHRSX	1	1	0.2	0.567216062331435	1	Endothelial_cells	DHRSX
Endothelial_cells__ARSD	1	1	0.2	0.567216062331435	1	Endothelial_cells	ARSD
Endothelial_cells__PUDP	1	1	0.2	0.567216062331435	1	Endothelial_cells	PUDP
Endothelial_cells__PNPLA4	1	1	0.2	0.567216062331435	1	Endothelial_cells	PNPLA4
Endothelial_cells__WWC3	1	1	0.2	0.567216062331435	1	Endothelial_cells	WWC3
Endothelial_cells__ARHGAP6	1	1	0.2	0.567216062331435	1	Endothelial_cells	ARHGAP6
Endothelial_cells__PRPS2	1	1	0.2	0.567216062331435	1	Endothelial_cells	PRPS2
Endothelial_cells__TRAPPC2	1	1	0.2	0.567216062331435	1	Endothelial_cells	TRAPPC2
Endothelial_cells__PIGA	1	1	0.2	0.567216062331435	1	Endothelial_cells	PIGA
Endothelial_cells__CA5B	1	1	0.2	0.567216062331435	1	Endothelial_cells	CA5B
Endothelial_cells__SYAP1	1	1	0.2	0.567216062331435	1	Endothelial_cells	SYAP1
Endothelial_cells__SMS	1	1	0.2	0.567216062331435	1	Endothelial_cells	SMS
Endothelial_cells__PRDX4	1	1	0.2	0.567216062331435	1	Endothelial_cells	PRDX4
Endothelial_cells__ACOT9	1	1	0.2	0.567216062331435	1	Endothelial_cells	ACOT9
Endothelial_cells__SAT1	1	1	0.2	0.567216062331435	1	Endothelial_cells	SAT1
Endothelial_cells__APOO	1	1	0.2	0.567216062331435	1	Endothelial_cells	APOO
Endothelial_cells__DYNLT3	1	1	0.2	0.567216062331435	1	Endothelial_cells	DYNLT3
Endothelial_cells__BCOR	1	1	0.2	0.567216062331435	1	Endothelial_cells	BCOR
Endothelial_cells__ATP6AP2	1	1	0.2	0.567216062331435	1	Endothelial_cells	ATP6AP2
Endothelial_cells__CXORF38	1	1	0.2	0.567216062331435	1	Endothelial_cells	CXORF38
Endothelial_cells__KDM6A	1	1	0.2	0.567216062331435	1	Endothelial_cells	KDM6A
Endothelial_cells__CHST7	1	1	0.2	0.567216062331435	1	Endothelial_cells	CHST7
Endothelial_cells__JADE3	1	1	0.2	0.567216062331435	1	Endothelial_cells	JADE3
Endothelial_cells__USP11	1	1	0.2	0.567216062331435	1	Endothelial_cells	USP11
Endothelial_cells__UXT	1	1	0.2	0.567216062331435	1	Endothelial_cells	UXT
Endothelial_cells__EBP	1	1	0.2	0.567216062331435	1	Endothelial_cells	EBP
Endothelial_cells__HDAC6	1	1	0.2	0.567216062331435	1	Endothelial_cells	HDAC6
Endothelial_cells__PQBP1	1	1	0.2	0.567216062331435	1	Endothelial_cells	PQBP1
Endothelial_cells__GRIPAP1	1	1	0.2	0.567216062331435	1	Endothelial_cells	GRIPAP1
Endothelial_cells__PRAF2	1	1	0.2	0.567216062331435	1	Endothelial_cells	PRAF2
Endothelial_cells__PLP2	1	1	0.2	0.567216062331435	1	Endothelial_cells	PLP2
Endothelial_cells__MAGED1	1	1	0.2	0.567216062331435	1	Endothelial_cells	MAGED1
Endothelial_cells__TSPYL2	1	1	0.2	0.567216062331435	1	Endothelial_cells	TSPYL2
Endothelial_cells__PHF8	1	1	0.2	0.567216062331435	1	Endothelial_cells	PHF8
Endothelial_cells__MAGED2	1	1	0.2	0.567216062331435	1	Endothelial_cells	MAGED2
Endothelial_cells__KLF8	1	1	0.2	0.567216062331435	1	Endothelial_cells	KLF8
Endothelial_cells__AR	1	1	0.2	0.567216062331435	1	Endothelial_cells	AR
Endothelial_cells__OPHN1	1	1	0.2	0.567216062331435	1	Endothelial_cells	OPHN1
Endothelial_cells__YIPF6	1	1	0.2	0.567216062331435	1	Endothelial_cells	YIPF6
Endothelial_cells__EFNB1	1	1	0.2	0.567216062331435	1	Endothelial_cells	EFNB1
Endothelial_cells__IGBP1	1	1	0.2	0.567216062331435	1	Endothelial_cells	IGBP1
Endothelial_cells__SNX12	1	1	0.2	0.567216062331435	1	Endothelial_cells	SNX12
Endothelial_cells__FOXO4	1	1	0.2	0.567216062331435	1	Endothelial_cells	FOXO4
Endothelial_cells__NONO	1	1	0.2	0.567216062331435	1	Endothelial_cells	NONO
Endothelial_cells__NHSL2	1	1	0.2	0.567216062331435	1	Endothelial_cells	NHSL2
Endothelial_cells__PBDC1	1	1	0.2	0.567216062331435	1	Endothelial_cells	PBDC1
Endothelial_cells__MAGT1	1	1	0.2	0.567216062331435	1	Endothelial_cells	MAGT1
Endothelial_cells__ATP7A	1	1	0.2	0.567216062331435	1	Endothelial_cells	ATP7A
Endothelial_cells__CYSLTR1	1	1	0.2	0.567216062331435	1	Endothelial_cells	CYSLTR1
Endothelial_cells__HDX	1	1	0.2	0.567216062331435	1	Endothelial_cells	HDX
Endothelial_cells__APOOL	1	1	0.2	0.567216062331435	1	Endothelial_cells	APOOL
Endothelial_cells__POF1B	1	1	0.2	0.567216062331435	1	Endothelial_cells	POF1B
Endothelial_cells__KLHL4	1	1	0.2	0.567216062331435	1	Endothelial_cells	KLHL4
Endothelial_cells__BEX5	1	1	0.2	0.567216062331435	1	Endothelial_cells	BEX5
Endothelial_cells__TCEAL4	1	1	0.2	0.567216062331435	1	Endothelial_cells	TCEAL4
Endothelial_cells__TCEAL1	1	1	0.2	0.567216062331435	1	Endothelial_cells	TCEAL1
Endothelial_cells__PRPS1	1	1	0.2	0.567216062331435	1	Endothelial_cells	PRPS1
Endothelial_cells__TSC22D3	1	1	0.2	0.567216062331435	1	Endothelial_cells	TSC22D3
Endothelial_cells__MID2	1	1	0.2	0.567216062331435	1	Endothelial_cells	MID2
Endothelial_cells__AMMECR1	1	1	0.2	0.567216062331435	1	Endothelial_cells	AMMECR1
Endothelial_cells__IL13RA1	1	1	0.2	0.567216062331435	1	Endothelial_cells	IL13RA1
Endothelial_cells__NKRF	1	1	0.2	0.567216062331435	1	Endothelial_cells	NKRF
Endothelial_cells__LAMP2	1	1	0.2	0.567216062331435	1	Endothelial_cells	LAMP2
Endothelial_cells__CUL4B	1	1	0.2	0.567216062331435	1	Endothelial_cells	CUL4B
Endothelial_cells__C1GALT1C1	1	1	0.2	0.567216062331435	1	Endothelial_cells	C1GALT1C1
Endothelial_cells__ZDHHC9	1	1	0.2	0.567216062331435	1	Endothelial_cells	ZDHHC9
Endothelial_cells__UTP14A	1	1	0.2	0.567216062331435	1	Endothelial_cells	UTP14A
Endothelial_cells__BCORL1	1	1	0.2	0.567216062331435	1	Endothelial_cells	BCORL1
Endothelial_cells__ELF4	1	1	0.2	0.567216062331435	1	Endothelial_cells	ELF4
Endothelial_cells__FAM122C	1	1	0.2	0.567216062331435	1	Endothelial_cells	FAM122C
Endothelial_cells__MOSPD1	1	1	0.2	0.567216062331435	1	Endothelial_cells	MOSPD1
Endothelial_cells__SMIM10	1	1	0.2	0.567216062331435	1	Endothelial_cells	SMIM10
Endothelial_cells__ZNF75D	1	1	0.2	0.567216062331435	1	Endothelial_cells	ZNF75D
Endothelial_cells__ZNF449	1	1	0.2	0.567216062331435	1	Endothelial_cells	ZNF449
Endothelial_cells__SLC9A6	1	1	0.2	0.567216062331435	1	Endothelial_cells	SLC9A6
Endothelial_cells__FHL1	1	1	0.2	0.567216062331435	1	Endothelial_cells	FHL1
Endothelial_cells__MAP7D3	1	1	0.2	0.567216062331435	1	Endothelial_cells	MAP7D3
Endothelial_cells__ARHGEF6	1	1	0.2	0.567216062331435	1	Endothelial_cells	ARHGEF6
Endothelial_cells__RBMX	1	1	0.2	0.567216062331435	1	Endothelial_cells	RBMX
Endothelial_cells__ATP11C	1	1	0.2	0.567216062331435	1	Endothelial_cells	ATP11C
Endothelial_cells__LDOC1	1	1	0.2	0.567216062331435	1	Endothelial_cells	LDOC1
Endothelial_cells__FMR1	1	1	0.2	0.567216062331435	1	Endothelial_cells	FMR1
Endothelial_cells__IDS	1	1	0.2	0.567216062331435	1	Endothelial_cells	IDS
Endothelial_cells__HMGB3	1	1	0.2	0.567216062331435	1	Endothelial_cells	HMGB3
Endothelial_cells__CETN2	1	1	0.2	0.567216062331435	1	Endothelial_cells	CETN2
Endothelial_cells__NSDHL	1	1	0.2	0.567216062331435	1	Endothelial_cells	NSDHL
Endothelial_cells__SSR4	1	1	0.2	0.567216062331435	1	Endothelial_cells	SSR4
Endothelial_cells__ARHGAP4	1	1	0.2	0.567216062331435	1	Endothelial_cells	ARHGAP4
Endothelial_cells__RENBP	1	1	0.2	0.567216062331435	1	Endothelial_cells	RENBP
Endothelial_cells__HCFC1	1	1	0.2	0.567216062331435	1	Endothelial_cells	HCFC1
Endothelial_cells__FLNA	1	1	0.2	0.567216062331435	1	Endothelial_cells	FLNA
Endothelial_cells__EMD	1	1	0.2	0.567216062331435	1	Endothelial_cells	EMD
Endothelial_cells__TAZ	1	1	0.2	0.567216062331435	1	Endothelial_cells	TAZ
Endothelial_cells__LAGE3	1	1	0.2	0.567216062331435	1	Endothelial_cells	LAGE3
Endothelial_cells__FAM3A	1	1	0.2	0.567216062331435	1	Endothelial_cells	FAM3A
Endothelial_cells__G6PD	1	1	0.2	0.567216062331435	1	Endothelial_cells	G6PD
Endothelial_cells__DKC1	1	1	0.2	0.567216062331435	1	Endothelial_cells	DKC1
Endothelial_cells__MPP1	1	1	0.2	0.567216062331435	1	Endothelial_cells	MPP1
Endothelial_cells__F8	1	1	0.2	0.567216062331435	1	Endothelial_cells	F8
Endothelial_cells__VBP1	1	1	0.2	0.567216062331435	1	Endothelial_cells	VBP1
Endothelial_cells__VAMP7	1	1	0.2	0.567216062331435	1	Endothelial_cells	VAMP7
Endothelial_cells__FBXO25	1	1	0.2	0.567216062331435	1	Endothelial_cells	FBXO25
Endothelial_cells__KBTBD11	1	1	0.2	0.567216062331435	1	Endothelial_cells	KBTBD11
Endothelial_cells__AGPAT5	1	1	0.2	0.567216062331435	1	Endothelial_cells	AGPAT5
Endothelial_cells__MFHAS1	1	1	0.2	0.567216062331435	1	Endothelial_cells	MFHAS1
Endothelial_cells__PINX1	1	1	0.2	0.567216062331435	1	Endothelial_cells	PINX1
Endothelial_cells__MTMR9	1	1	0.2	0.567216062331435	1	Endothelial_cells	MTMR9
Endothelial_cells__NEIL2	1	1	0.2	0.567216062331435	1	Endothelial_cells	NEIL2
Endothelial_cells__CTSB	1	1	0.2	0.567216062331435	1	Endothelial_cells	CTSB
Endothelial_cells__LONRF1	1	1	0.2	0.567216062331435	1	Endothelial_cells	LONRF1
Endothelial_cells__MICU3	1	1	0.2	0.567216062331435	1	Endothelial_cells	MICU3
Endothelial_cells__VPS37A	1	1	0.2	0.567216062331435	1	Endothelial_cells	VPS37A
Endothelial_cells__MTUS1	1	1	0.2	0.567216062331435	1	Endothelial_cells	MTUS1
Endothelial_cells__ASAH1	1	1	0.2	0.567216062331435	1	Endothelial_cells	ASAH1
Endothelial_cells__LPL	1	1	0.2	0.567216062331435	1	Endothelial_cells	LPL
Endothelial_cells__ATP6V1B2	1	1	0.2	0.567216062331435	1	Endothelial_cells	ATP6V1B2
Endothelial_cells__DMTN	1	1	0.2	0.567216062331435	1	Endothelial_cells	DMTN
Endothelial_cells__FAM160B2	1	1	0.2	0.567216062331435	1	Endothelial_cells	FAM160B2
Endothelial_cells__BMP1	1	1	0.2	0.567216062331435	1	Endothelial_cells	BMP1
Endothelial_cells__POLR3D	1	1	0.2	0.567216062331435	1	Endothelial_cells	POLR3D
Endothelial_cells__SLC39A14	1	1	0.2	0.567216062331435	1	Endothelial_cells	SLC39A14
Endothelial_cells__PPP3CC	1	1	0.2	0.567216062331435	1	Endothelial_cells	PPP3CC
Endothelial_cells__PDLIM2	1	1	0.2	0.567216062331435	1	Endothelial_cells	PDLIM2
Endothelial_cells__BIN3	1	1	0.2	0.567216062331435	1	Endothelial_cells	BIN3
Endothelial_cells__EGR3	1	1	0.2	0.567216062331435	1	Endothelial_cells	EGR3
Endothelial_cells__TNFRSF10D	1	1	0.2	0.567216062331435	1	Endothelial_cells	TNFRSF10D
Endothelial_cells__TNFRSF10A	1	1	0.2	0.567216062331435	1	Endothelial_cells	TNFRSF10A
Endothelial_cells__R3HCC1	1	1	0.2	0.567216062331435	1	Endothelial_cells	R3HCC1
Endothelial_cells__LOXL2	1	1	0.2	0.567216062331435	1	Endothelial_cells	LOXL2
Endothelial_cells__PTK2B	1	1	0.2	0.567216062331435	1	Endothelial_cells	PTK2B
Endothelial_cells__EPHX2	1	1	0.2	0.567216062331435	1	Endothelial_cells	EPHX2
Endothelial_cells__KIF13B	1	1	0.2	0.567216062331435	1	Endothelial_cells	KIF13B
Endothelial_cells__DUSP4	1	1	0.2	0.567216062331435	1	Endothelial_cells	DUSP4
Endothelial_cells__DCTN6	1	1	0.2	0.567216062331435	1	Endothelial_cells	DCTN6
Endothelial_cells__GTF2E2	1	1	0.2	0.567216062331435	1	Endothelial_cells	GTF2E2
Endothelial_cells__MAK16	1	1	0.2	0.567216062331435	1	Endothelial_cells	MAK16
Endothelial_cells__ADGRA2	1	1	0.2	0.567216062331435	1	Endothelial_cells	ADGRA2
Endothelial_cells__ASH2L	1	1	0.2	0.567216062331435	1	Endothelial_cells	ASH2L
Endothelial_cells__PLEKHA2	1	1	0.2	0.567216062331435	1	Endothelial_cells	PLEKHA2
Endothelial_cells__GPAT4	1	1	0.2	0.567216062331435	1	Endothelial_cells	GPAT4
Endothelial_cells__KAT6A	1	1	0.2	0.567216062331435	1	Endothelial_cells	KAT6A
Endothelial_cells__VDAC3	1	1	0.2	0.567216062331435	1	Endothelial_cells	VDAC3
Endothelial_cells__RNF170	1	1	0.2	0.567216062331435	1	Endothelial_cells	RNF170
Endothelial_cells__FNTA	1	1	0.2	0.567216062331435	1	Endothelial_cells	FNTA
Endothelial_cells__UBE2V2	1	1	0.2	0.567216062331435	1	Endothelial_cells	UBE2V2
Endothelial_cells__CHD7	1	1	0.2	0.567216062331435	1	Endothelial_cells	CHD7
Endothelial_cells__ASPH	1	1	0.2	0.567216062331435	1	Endothelial_cells	ASPH
Endothelial_cells__ARMC1	1	1	0.2	0.567216062331435	1	Endothelial_cells	ARMC1
Endothelial_cells__MTFR1	1	1	0.2	0.567216062331435	1	Endothelial_cells	MTFR1
Endothelial_cells__RRS1	1	1	0.2	0.567216062331435	1	Endothelial_cells	RRS1
Endothelial_cells__VCPIP1	1	1	0.2	0.567216062331435	1	Endothelial_cells	VCPIP1
Endothelial_cells__CSPP1	1	1	0.2	0.567216062331435	1	Endothelial_cells	CSPP1
Endothelial_cells__NCOA2	1	1	0.2	0.567216062331435	1	Endothelial_cells	NCOA2
Endothelial_cells__TRAM1	1	1	0.2	0.567216062331435	1	Endothelial_cells	TRAM1
Endothelial_cells__LACTB2	1	1	0.2	0.567216062331435	1	Endothelial_cells	LACTB2
Endothelial_cells__TERF1	1	1	0.2	0.567216062331435	1	Endothelial_cells	TERF1
Endothelial_cells__TMEM70	1	1	0.2	0.567216062331435	1	Endothelial_cells	TMEM70
Endothelial_cells__LY96	1	1	0.2	0.567216062331435	1	Endothelial_cells	LY96
Endothelial_cells__PEX2	1	1	0.2	0.567216062331435	1	Endothelial_cells	PEX2
Endothelial_cells__PKIA	1	1	0.2	0.567216062331435	1	Endothelial_cells	PKIA
Endothelial_cells__ZC2HC1A	1	1	0.2	0.567216062331435	1	Endothelial_cells	ZC2HC1A
Endothelial_cells__TPD52	1	1	0.2	0.567216062331435	1	Endothelial_cells	TPD52
Endothelial_cells__ZBTB10	1	1	0.2	0.567216062331435	1	Endothelial_cells	ZBTB10
Endothelial_cells__PAG1	1	1	0.2	0.567216062331435	1	Endothelial_cells	PAG1
Endothelial_cells__FABP5	1	1	0.2	0.567216062331435	1	Endothelial_cells	FABP5
Endothelial_cells__IMPA1	1	1	0.2	0.567216062331435	1	Endothelial_cells	IMPA1
Endothelial_cells__CA2	1	1	0.2	0.567216062331435	1	Endothelial_cells	CA2
Endothelial_cells__NBN	1	1	0.2	0.567216062331435	1	Endothelial_cells	NBN
Endothelial_cells__TMEM64	1	1	0.2	0.567216062331435	1	Endothelial_cells	TMEM64
Endothelial_cells__TRIQK	1	1	0.2	0.567216062331435	1	Endothelial_cells	TRIQK
Endothelial_cells__GEM	1	1	0.2	0.567216062331435	1	Endothelial_cells	GEM
Endothelial_cells__TP53INP1	1	1	0.2	0.567216062331435	1	Endothelial_cells	TP53INP1
Endothelial_cells__PLEKHF2	1	1	0.2	0.567216062331435	1	Endothelial_cells	PLEKHF2
Endothelial_cells__MTERF3	1	1	0.2	0.567216062331435	1	Endothelial_cells	MTERF3
Endothelial_cells__TSPYL5	1	1	0.2	0.567216062331435	1	Endothelial_cells	TSPYL5
Endothelial_cells__MTDH	1	1	0.2	0.567216062331435	1	Endothelial_cells	MTDH
Endothelial_cells__LAPTM4B	1	1	0.2	0.567216062331435	1	Endothelial_cells	LAPTM4B
Endothelial_cells__MATN2	1	1	0.2	0.567216062331435	1	Endothelial_cells	MATN2
Endothelial_cells__NIPAL2	1	1	0.2	0.567216062331435	1	Endothelial_cells	NIPAL2
Endothelial_cells__POLR2K	1	1	0.2	0.567216062331435	1	Endothelial_cells	POLR2K
Endothelial_cells__ANKRD46	1	1	0.2	0.567216062331435	1	Endothelial_cells	ANKRD46
Endothelial_cells__YWHAZ	1	1	0.2	0.567216062331435	1	Endothelial_cells	YWHAZ
Endothelial_cells__NCALD	1	1	0.2	0.567216062331435	1	Endothelial_cells	NCALD
Endothelial_cells__KLF10	1	1	0.2	0.567216062331435	1	Endothelial_cells	KLF10
Endothelial_cells__FZD6	1	1	0.2	0.567216062331435	1	Endothelial_cells	FZD6
Endothelial_cells__EIF3E	1	1	0.2	0.567216062331435	1	Endothelial_cells	EIF3E
Endothelial_cells__NUDCD1	1	1	0.2	0.567216062331435	1	Endothelial_cells	NUDCD1
Endothelial_cells__SYBU	1	1	0.2	0.567216062331435	1	Endothelial_cells	SYBU
Endothelial_cells__TRPS1	1	1	0.2	0.567216062331435	1	Endothelial_cells	TRPS1
Endothelial_cells__EIF3H	1	1	0.2	0.567216062331435	1	Endothelial_cells	EIF3H
Endothelial_cells__RAD21	1	1	0.2	0.567216062331435	1	Endothelial_cells	RAD21
Endothelial_cells__MED30	1	1	0.2	0.567216062331435	1	Endothelial_cells	MED30
Endothelial_cells__SAMD12	1	1	0.2	0.567216062331435	1	Endothelial_cells	SAMD12
Endothelial_cells__DERL1	1	1	0.2	0.567216062331435	1	Endothelial_cells	DERL1
Endothelial_cells__FBXO32	1	1	0.2	0.567216062331435	1	Endothelial_cells	FBXO32
Endothelial_cells__TRMT12	1	1	0.2	0.567216062331435	1	Endothelial_cells	TRMT12
Endothelial_cells__SQLE	1	1	0.2	0.567216062331435	1	Endothelial_cells	SQLE
Endothelial_cells__FAM49B	1	1	0.2	0.567216062331435	1	Endothelial_cells	FAM49B
Endothelial_cells__PHF20L1	1	1	0.2	0.567216062331435	1	Endothelial_cells	PHF20L1
Endothelial_cells__NDRG1	1	1	0.2	0.567216062331435	1	Endothelial_cells	NDRG1
Endothelial_cells__ST3GAL1	1	1	0.2	0.567216062331435	1	Endothelial_cells	ST3GAL1
Endothelial_cells__ARC	1	1	0.2	0.567216062331435	1	Endothelial_cells	ARC
Endothelial_cells__TOP1MT	1	1	0.2	0.567216062331435	1	Endothelial_cells	TOP1MT
Endothelial_cells__RHPN1	1	1	0.2	0.567216062331435	1	Endothelial_cells	RHPN1
Endothelial_cells__ZNF623	1	1	0.2	0.567216062331435	1	Endothelial_cells	ZNF623
Endothelial_cells__PLEC	1	1	0.2	0.567216062331435	1	Endothelial_cells	PLEC
Endothelial_cells__HSF1	1	1	0.2	0.567216062331435	1	Endothelial_cells	HSF1
Endothelial_cells__DGAT1	1	1	0.2	0.567216062331435	1	Endothelial_cells	DGAT1
Endothelial_cells__SLC52A2	1	1	0.2	0.567216062331435	1	Endothelial_cells	SLC52A2
Endothelial_cells__ADCK5	1	1	0.2	0.567216062331435	1	Endothelial_cells	ADCK5
Endothelial_cells__CYHR1	1	1	0.2	0.567216062331435	1	Endothelial_cells	CYHR1
Endothelial_cells__ZNF7	1	1	0.2	0.567216062331435	1	Endothelial_cells	ZNF7
Endothelial_cells__C8ORF33	1	1	0.2	0.567216062331435	1	Endothelial_cells	C8ORF33
Endothelial_cells__KANK1	1	1	0.2	0.567216062331435	1	Endothelial_cells	KANK1
Endothelial_cells__PUM3	1	1	0.2	0.567216062331435	1	Endothelial_cells	PUM3
Endothelial_cells__GLIS3	1	1	0.2	0.567216062331435	1	Endothelial_cells	GLIS3
Endothelial_cells__SPATA6L	1	1	0.2	0.567216062331435	1	Endothelial_cells	SPATA6L
Endothelial_cells__JAK2	1	1	0.2	0.567216062331435	1	Endothelial_cells	JAK2
Endothelial_cells__PLGRKT	1	1	0.2	0.567216062331435	1	Endothelial_cells	PLGRKT
Endothelial_cells__CD274	1	1	0.2	0.567216062331435	1	Endothelial_cells	CD274
Endothelial_cells__PDCD1LG2	1	1	0.2	0.567216062331435	1	Endothelial_cells	PDCD1LG2
Endothelial_cells__KIAA2026	1	1	0.2	0.567216062331435	1	Endothelial_cells	KIAA2026
Endothelial_cells__UHRF2	1	1	0.2	0.567216062331435	1	Endothelial_cells	UHRF2
Endothelial_cells__BNC2	1	1	0.2	0.567216062331435	1	Endothelial_cells	BNC2
Endothelial_cells__DENND4C	1	1	0.2	0.567216062331435	1	Endothelial_cells	DENND4C
Endothelial_cells__KLHL9	1	1	0.2	0.567216062331435	1	Endothelial_cells	KLHL9
Endothelial_cells__CDKN2B	1	1	0.2	0.567216062331435	1	Endothelial_cells	CDKN2B
Endothelial_cells__TUSC1	1	1	0.2	0.567216062331435	1	Endothelial_cells	TUSC1
Endothelial_cells__MOB3B	1	1	0.2	0.567216062331435	1	Endothelial_cells	MOB3B
Endothelial_cells__TOPORS	1	1	0.2	0.567216062331435	1	Endothelial_cells	TOPORS
Endothelial_cells__DNAJA1	1	1	0.2	0.567216062331435	1	Endothelial_cells	DNAJA1
Endothelial_cells__NFX1	1	1	0.2	0.567216062331435	1	Endothelial_cells	NFX1
Endothelial_cells__AQP3	1	1	0.2	0.567216062331435	1	Endothelial_cells	AQP3
Endothelial_cells__UBE2R2	1	1	0.2	0.567216062331435	1	Endothelial_cells	UBE2R2
Endothelial_cells__UBAP2	1	1	0.2	0.567216062331435	1	Endothelial_cells	UBAP2
Endothelial_cells__UBAP1	1	1	0.2	0.567216062331435	1	Endothelial_cells	UBAP1
Endothelial_cells__SIGMAR1	1	1	0.2	0.567216062331435	1	Endothelial_cells	SIGMAR1
Endothelial_cells__IL11RA	1	1	0.2	0.567216062331435	1	Endothelial_cells	IL11RA
Endothelial_cells__FAM214B	1	1	0.2	0.567216062331435	1	Endothelial_cells	FAM214B
Endothelial_cells__UNC13B	1	1	0.2	0.567216062331435	1	Endothelial_cells	UNC13B
Endothelial_cells__CREB3	1	1	0.2	0.567216062331435	1	Endothelial_cells	CREB3
Endothelial_cells__GBA2	1	1	0.2	0.567216062331435	1	Endothelial_cells	GBA2
Endothelial_cells__RGP1	1	1	0.2	0.567216062331435	1	Endothelial_cells	RGP1
Endothelial_cells__HINT2	1	1	0.2	0.567216062331435	1	Endothelial_cells	HINT2
Endothelial_cells__RECK	1	1	0.2	0.567216062331435	1	Endothelial_cells	RECK
Endothelial_cells__GNE	1	1	0.2	0.567216062331435	1	Endothelial_cells	GNE
Endothelial_cells__RNF38	1	1	0.2	0.567216062331435	1	Endothelial_cells	RNF38
Endothelial_cells__ZCCHC7	1	1	0.2	0.567216062331435	1	Endothelial_cells	ZCCHC7
Endothelial_cells__GRHPR	1	1	0.2	0.567216062331435	1	Endothelial_cells	GRHPR
Endothelial_cells__ZBTB5	1	1	0.2	0.567216062331435	1	Endothelial_cells	ZBTB5
Endothelial_cells__POLR1E	1	1	0.2	0.567216062331435	1	Endothelial_cells	POLR1E
Endothelial_cells__DCAF10	1	1	0.2	0.567216062331435	1	Endothelial_cells	DCAF10
Endothelial_cells__KLF9	1	1	0.2	0.567216062331435	1	Endothelial_cells	KLF9
Endothelial_cells__CARNMT1	1	1	0.2	0.567216062331435	1	Endothelial_cells	CARNMT1
Endothelial_cells__PCSK5	1	1	0.2	0.567216062331435	1	Endothelial_cells	PCSK5
Endothelial_cells__RFK	1	1	0.2	0.567216062331435	1	Endothelial_cells	RFK
Endothelial_cells__GNAQ	1	1	0.2	0.567216062331435	1	Endothelial_cells	GNAQ
Endothelial_cells__UBQLN1	1	1	0.2	0.567216062331435	1	Endothelial_cells	UBQLN1
Endothelial_cells__GKAP1	1	1	0.2	0.567216062331435	1	Endothelial_cells	GKAP1
Endothelial_cells__GOLM1	1	1	0.2	0.567216062331435	1	Endothelial_cells	GOLM1
Endothelial_cells__SPIN1	1	1	0.2	0.567216062331435	1	Endothelial_cells	SPIN1
Endothelial_cells__SECISBP2	1	1	0.2	0.567216062331435	1	Endothelial_cells	SECISBP2
Endothelial_cells__IARS	1	1	0.2	0.567216062331435	1	Endothelial_cells	IARS
Endothelial_cells__IPPK	1	1	0.2	0.567216062331435	1	Endothelial_cells	IPPK
Endothelial_cells__CARD19	1	1	0.2	0.567216062331435	1	Endothelial_cells	CARD19
Endothelial_cells__FAM120AOS	1	1	0.2	0.567216062331435	1	Endothelial_cells	FAM120AOS
Endothelial_cells__PHF2	1	1	0.2	0.567216062331435	1	Endothelial_cells	PHF2
Endothelial_cells__PTPDC1	1	1	0.2	0.567216062331435	1	Endothelial_cells	PTPDC1
Endothelial_cells__FANCC	1	1	0.2	0.567216062331435	1	Endothelial_cells	FANCC
Endothelial_cells__HABP4	1	1	0.2	0.567216062331435	1	Endothelial_cells	HABP4
Endothelial_cells__TMOD1	1	1	0.2	0.567216062331435	1	Endothelial_cells	TMOD1
Endothelial_cells__ANP32B	1	1	0.2	0.567216062331435	1	Endothelial_cells	ANP32B
Endothelial_cells__NR4A3	1	1	0.2	0.567216062331435	1	Endothelial_cells	NR4A3
Endothelial_cells__STX17	1	1	0.2	0.567216062331435	1	Endothelial_cells	STX17
Endothelial_cells__TEX10	1	1	0.2	0.567216062331435	1	Endothelial_cells	TEX10
Endothelial_cells__MSANTD3	1	1	0.2	0.567216062331435	1	Endothelial_cells	MSANTD3
Endothelial_cells__ZNF189	1	1	0.2	0.567216062331435	1	Endothelial_cells	ZNF189
Endothelial_cells__SMC2	1	1	0.2	0.567216062331435	1	Endothelial_cells	SMC2
Endothelial_cells__NIPSNAP3A	1	1	0.2	0.567216062331435	1	Endothelial_cells	NIPSNAP3A
Endothelial_cells__SLC44A1	1	1	0.2	0.567216062331435	1	Endothelial_cells	SLC44A1
Endothelial_cells__ZNF462	1	1	0.2	0.567216062331435	1	Endothelial_cells	ZNF462
Endothelial_cells__KLF4	1	1	0.2	0.567216062331435	1	Endothelial_cells	KLF4
Endothelial_cells__TMEM245	1	1	0.2	0.567216062331435	1	Endothelial_cells	TMEM245
Endothelial_cells__DNAJC25	1	1	0.2	0.567216062331435	1	Endothelial_cells	DNAJC25
Endothelial_cells__UGCG	1	1	0.2	0.567216062331435	1	Endothelial_cells	UGCG
Endothelial_cells__SLC31A2	1	1	0.2	0.567216062331435	1	Endothelial_cells	SLC31A2
Endothelial_cells__FKBP15	1	1	0.2	0.567216062331435	1	Endothelial_cells	FKBP15
Endothelial_cells__HDHD3	1	1	0.2	0.567216062331435	1	Endothelial_cells	HDHD3
Endothelial_cells__ZNF618	1	1	0.2	0.567216062331435	1	Endothelial_cells	ZNF618
Endothelial_cells__AKNA	1	1	0.2	0.567216062331435	1	Endothelial_cells	AKNA
Endothelial_cells__TLR4	1	1	0.2	0.567216062331435	1	Endothelial_cells	TLR4
Endothelial_cells__MEGF9	1	1	0.2	0.567216062331435	1	Endothelial_cells	MEGF9
Endothelial_cells__CNTRL	1	1	0.2	0.567216062331435	1	Endothelial_cells	CNTRL
Endothelial_cells__MRRF	1	1	0.2	0.567216062331435	1	Endothelial_cells	MRRF
Endothelial_cells__PDCL	1	1	0.2	0.567216062331435	1	Endothelial_cells	PDCL
Endothelial_cells__DENND1A	1	1	0.2	0.567216062331435	1	Endothelial_cells	DENND1A
Endothelial_cells__NEK6	1	1	0.2	0.567216062331435	1	Endothelial_cells	NEK6
Endothelial_cells__ARPC5L	1	1	0.2	0.567216062331435	1	Endothelial_cells	ARPC5L
Endothelial_cells__GAPVD1	1	1	0.2	0.567216062331435	1	Endothelial_cells	GAPVD1
Endothelial_cells__MVB12B	1	1	0.2	0.567216062331435	1	Endothelial_cells	MVB12B
Endothelial_cells__STXBP1	1	1	0.2	0.567216062331435	1	Endothelial_cells	STXBP1
Endothelial_cells__SH2D3C	1	1	0.2	0.567216062331435	1	Endothelial_cells	SH2D3C
Endothelial_cells__CDK9	1	1	0.2	0.567216062331435	1	Endothelial_cells	CDK9
Endothelial_cells__ST6GALNAC4	1	1	0.2	0.567216062331435	1	Endothelial_cells	ST6GALNAC4
Endothelial_cells__DPM2	1	1	0.2	0.567216062331435	1	Endothelial_cells	DPM2
Endothelial_cells__C9ORF16	1	1	0.2	0.567216062331435	1	Endothelial_cells	C9ORF16
Endothelial_cells__TRUB2	1	1	0.2	0.567216062331435	1	Endothelial_cells	TRUB2
Endothelial_cells__COQ4	1	1	0.2	0.567216062331435	1	Endothelial_cells	COQ4
Endothelial_cells__SPTAN1	1	1	0.2	0.567216062331435	1	Endothelial_cells	SPTAN1
Endothelial_cells__WDR34	1	1	0.2	0.567216062331435	1	Endothelial_cells	WDR34
Endothelial_cells__SET	1	1	0.2	0.567216062331435	1	Endothelial_cells	SET
Endothelial_cells__ZDHHC12	1	1	0.2	0.567216062331435	1	Endothelial_cells	ZDHHC12
Endothelial_cells__LRRC8A	1	1	0.2	0.567216062331435	1	Endothelial_cells	LRRC8A
Endothelial_cells__DOLK	1	1	0.2	0.567216062331435	1	Endothelial_cells	DOLK
Endothelial_cells__IER5L	1	1	0.2	0.567216062331435	1	Endothelial_cells	IER5L
Endothelial_cells__NTMT1	1	1	0.2	0.567216062331435	1	Endothelial_cells	NTMT1
Endothelial_cells__ABL1	1	1	0.2	0.567216062331435	1	Endothelial_cells	ABL1
Endothelial_cells__PRRC2B	1	1	0.2	0.567216062331435	1	Endothelial_cells	PRRC2B
Endothelial_cells__SETX	1	1	0.2	0.567216062331435	1	Endothelial_cells	SETX
Endothelial_cells__GTF3C4	1	1	0.2	0.567216062331435	1	Endothelial_cells	GTF3C4
Endothelial_cells__RALGDS	1	1	0.2	0.567216062331435	1	Endothelial_cells	RALGDS
Endothelial_cells__SURF6	1	1	0.2	0.567216062331435	1	Endothelial_cells	SURF6
Endothelial_cells__REXO4	1	1	0.2	0.567216062331435	1	Endothelial_cells	REXO4
Endothelial_cells__RXRA	1	1	0.2	0.567216062331435	1	Endothelial_cells	RXRA
Endothelial_cells__OLFM1	1	1	0.2	0.567216062331435	1	Endothelial_cells	OLFM1
Endothelial_cells__CAMSAP1	1	1	0.2	0.567216062331435	1	Endothelial_cells	CAMSAP1
Endothelial_cells__GPSM1	1	1	0.2	0.567216062331435	1	Endothelial_cells	GPSM1
Endothelial_cells__EGFL7	1	1	0.2	0.567216062331435	1	Endothelial_cells	EGFL7
Endothelial_cells__RABL6	1	1	0.2	0.567216062331435	1	Endothelial_cells	RABL6
Endothelial_cells__PHPT1	1	1	0.2	0.567216062331435	1	Endothelial_cells	PHPT1
Endothelial_cells__ABCA2	1	1	0.2	0.567216062331435	1	Endothelial_cells	ABCA2
Endothelial_cells__MAN1B1	1	1	0.2	0.567216062331435	1	Endothelial_cells	MAN1B1
Endothelial_cells__DPP7	1	1	0.2	0.567216062331435	1	Endothelial_cells	DPP7
Endothelial_cells__TOR4A	1	1	0.2	0.567216062331435	1	Endothelial_cells	TOR4A
Endothelial_cells__NSMF	1	1	0.2	0.567216062331435	1	Endothelial_cells	NSMF
Endothelial_cells__DPH7	1	1	0.2	0.567216062331435	1	Endothelial_cells	DPH7
Endothelial_cells__SIRT3	1	1	0.2	0.567216062331435	1	Endothelial_cells	SIRT3
Endothelial_cells__IRF7	1	1	0.2	0.567216062331435	1	Endothelial_cells	IRF7
Endothelial_cells__DEAF1	1	1	0.2	0.567216062331435	1	Endothelial_cells	DEAF1
Endothelial_cells__EPS8L2	1	1	0.2	0.567216062331435	1	Endothelial_cells	EPS8L2
Endothelial_cells__CHID1	1	1	0.2	0.567216062331435	1	Endothelial_cells	CHID1
Endothelial_cells__TOLLIP	1	1	0.2	0.567216062331435	1	Endothelial_cells	TOLLIP
Endothelial_cells__CD81	1	1	0.2	0.567216062331435	1	Endothelial_cells	CD81
Endothelial_cells__CDKN1C	1	1	0.2	0.567216062331435	1	Endothelial_cells	CDKN1C
Endothelial_cells__PHLDA2	1	1	0.2	0.567216062331435	1	Endothelial_cells	PHLDA2
Endothelial_cells__CARS	1	1	0.2	0.567216062331435	1	Endothelial_cells	CARS
Endothelial_cells__OSBPL5	1	1	0.2	0.567216062331435	1	Endothelial_cells	OSBPL5
Endothelial_cells__ZNF195	1	1	0.2	0.567216062331435	1	Endothelial_cells	ZNF195
Endothelial_cells__NUP98	1	1	0.2	0.567216062331435	1	Endothelial_cells	NUP98
Endothelial_cells__RRM1	1	1	0.2	0.567216062331435	1	Endothelial_cells	RRM1
Endothelial_cells__SMPD1	1	1	0.2	0.567216062331435	1	Endothelial_cells	SMPD1
Endothelial_cells__TRIM3	1	1	0.2	0.567216062331435	1	Endothelial_cells	TRIM3
Endothelial_cells__TAF10	1	1	0.2	0.567216062331435	1	Endothelial_cells	TAF10
Endothelial_cells__ST5	1	1	0.2	0.567216062331435	1	Endothelial_cells	ST5
Endothelial_cells__AKIP1	1	1	0.2	0.567216062331435	1	Endothelial_cells	AKIP1
Endothelial_cells__TMEM9B	1	1	0.2	0.567216062331435	1	Endothelial_cells	TMEM9B
Endothelial_cells__ZNF143	1	1	0.2	0.567216062331435	1	Endothelial_cells	ZNF143
Endothelial_cells__WEE1	1	1	0.2	0.567216062331435	1	Endothelial_cells	WEE1
Endothelial_cells__SWAP70	1	1	0.2	0.567216062331435	1	Endothelial_cells	SWAP70
Endothelial_cells__ZBED5	1	1	0.2	0.567216062331435	1	Endothelial_cells	ZBED5
Endothelial_cells__PARVA	1	1	0.2	0.567216062331435	1	Endothelial_cells	PARVA
Endothelial_cells__ARNTL	1	1	0.2	0.567216062331435	1	Endothelial_cells	ARNTL
Endothelial_cells__PDE3B	1	1	0.2	0.567216062331435	1	Endothelial_cells	PDE3B
Endothelial_cells__HPS5	1	1	0.2	0.567216062331435	1	Endothelial_cells	HPS5
Endothelial_cells__UEVLD	1	1	0.2	0.567216062331435	1	Endothelial_cells	UEVLD
Endothelial_cells__ZDHHC13	1	1	0.2	0.567216062331435	1	Endothelial_cells	ZDHHC13
Endothelial_cells__METTL15	1	1	0.2	0.567216062331435	1	Endothelial_cells	METTL15
Endothelial_cells__ARL14EP	1	1	0.2	0.567216062331435	1	Endothelial_cells	ARL14EP
Endothelial_cells__ELP4	1	1	0.2	0.567216062331435	1	Endothelial_cells	ELP4
Endothelial_cells__PRRG4	1	1	0.2	0.567216062331435	1	Endothelial_cells	PRRG4
Endothelial_cells__HIPK3	1	1	0.2	0.567216062331435	1	Endothelial_cells	HIPK3
Endothelial_cells__COMMD9	1	1	0.2	0.567216062331435	1	Endothelial_cells	COMMD9
Endothelial_cells__TTC17	1	1	0.2	0.567216062331435	1	Endothelial_cells	TTC17
Endothelial_cells__HSD17B12	1	1	0.2	0.567216062331435	1	Endothelial_cells	HSD17B12
Endothelial_cells__ACCS	1	1	0.2	0.567216062331435	1	Endothelial_cells	ACCS
Endothelial_cells__CD82	1	1	0.2	0.567216062331435	1	Endothelial_cells	CD82
Endothelial_cells__TP53I11	1	1	0.2	0.567216062331435	1	Endothelial_cells	TP53I11
Endothelial_cells__PRDM11	1	1	0.2	0.567216062331435	1	Endothelial_cells	PRDM11
Endothelial_cells__SLC35C1	1	1	0.2	0.567216062331435	1	Endothelial_cells	SLC35C1
Endothelial_cells__PHF21A	1	1	0.2	0.567216062331435	1	Endothelial_cells	PHF21A
Endothelial_cells__DGKZ	1	1	0.2	0.567216062331435	1	Endothelial_cells	DGKZ
Endothelial_cells__MDK	1	1	0.2	0.567216062331435	1	Endothelial_cells	MDK
Endothelial_cells__AMBRA1	1	1	0.2	0.567216062331435	1	Endothelial_cells	AMBRA1
Endothelial_cells__C11ORF49	1	1	0.2	0.567216062331435	1	Endothelial_cells	C11ORF49
Endothelial_cells__ARFGAP2	1	1	0.2	0.567216062331435	1	Endothelial_cells	ARFGAP2
Endothelial_cells__MADD	1	1	0.2	0.567216062331435	1	Endothelial_cells	MADD
Endothelial_cells__CELF1	1	1	0.2	0.567216062331435	1	Endothelial_cells	CELF1
Endothelial_cells__KBTBD4	1	1	0.2	0.567216062331435	1	Endothelial_cells	KBTBD4
Endothelial_cells__SLC43A3	1	1	0.2	0.567216062331435	1	Endothelial_cells	SLC43A3
Endothelial_cells__TIMM10	1	1	0.2	0.567216062331435	1	Endothelial_cells	TIMM10
Endothelial_cells__MED19	1	1	0.2	0.567216062331435	1	Endothelial_cells	MED19
Endothelial_cells__FAM111A	1	1	0.2	0.567216062331435	1	Endothelial_cells	FAM111A
Endothelial_cells__STX3	1	1	0.2	0.567216062331435	1	Endothelial_cells	STX3
Endothelial_cells__PRPF19	1	1	0.2	0.567216062331435	1	Endothelial_cells	PRPF19
Endothelial_cells__TMEM109	1	1	0.2	0.567216062331435	1	Endothelial_cells	TMEM109
Endothelial_cells__SLC15A3	1	1	0.2	0.567216062331435	1	Endothelial_cells	SLC15A3
Endothelial_cells__TKFC	1	1	0.2	0.567216062331435	1	Endothelial_cells	TKFC
Endothelial_cells__TMEM258	1	1	0.2	0.567216062331435	1	Endothelial_cells	TMEM258
Endothelial_cells__FADS1	1	1	0.2	0.567216062331435	1	Endothelial_cells	FADS1
Endothelial_cells__FADS3	1	1	0.2	0.567216062331435	1	Endothelial_cells	FADS3
Endothelial_cells__ASRGL1	1	1	0.2	0.567216062331435	1	Endothelial_cells	ASRGL1
Endothelial_cells__GANAB	1	1	0.2	0.567216062331435	1	Endothelial_cells	GANAB
Endothelial_cells__UQCC3	1	1	0.2	0.567216062331435	1	Endothelial_cells	UQCC3
Endothelial_cells__NXF1	1	1	0.2	0.567216062331435	1	Endothelial_cells	NXF1
Endothelial_cells__WDR74	1	1	0.2	0.567216062331435	1	Endothelial_cells	WDR74
Endothelial_cells__RTN3	1	1	0.2	0.567216062331435	1	Endothelial_cells	RTN3
Endothelial_cells__MARK2	1	1	0.2	0.567216062331435	1	Endothelial_cells	MARK2
Endothelial_cells__STIP1	1	1	0.2	0.567216062331435	1	Endothelial_cells	STIP1
Endothelial_cells__FERMT3	1	1	0.2	0.567216062331435	1	Endothelial_cells	FERMT3
Endothelial_cells__DNAJC4	1	1	0.2	0.567216062331435	1	Endothelial_cells	DNAJC4
Endothelial_cells__VEGFB	1	1	0.2	0.567216062331435	1	Endothelial_cells	VEGFB
Endothelial_cells__PPP1R14B	1	1	0.2	0.567216062331435	1	Endothelial_cells	PPP1R14B
Endothelial_cells__PLCB3	1	1	0.2	0.567216062331435	1	Endothelial_cells	PLCB3
Endothelial_cells__GPR137	1	1	0.2	0.567216062331435	1	Endothelial_cells	GPR137
Endothelial_cells__ESRRA	1	1	0.2	0.567216062331435	1	Endothelial_cells	ESRRA
Endothelial_cells__TRMT112	1	1	0.2	0.567216062331435	1	Endothelial_cells	TRMT112
Endothelial_cells__PRDX5	1	1	0.2	0.567216062331435	1	Endothelial_cells	PRDX5
Endothelial_cells__RASGRP2	1	1	0.2	0.567216062331435	1	Endothelial_cells	RASGRP2
Endothelial_cells__SF1	1	1	0.2	0.567216062331435	1	Endothelial_cells	SF1
Endothelial_cells__MAP4K2	1	1	0.2	0.567216062331435	1	Endothelial_cells	MAP4K2
Endothelial_cells__ATG2A	1	1	0.2	0.567216062331435	1	Endothelial_cells	ATG2A
Endothelial_cells__PPP2R5B	1	1	0.2	0.567216062331435	1	Endothelial_cells	PPP2R5B
Endothelial_cells__SAC3D1	1	1	0.2	0.567216062331435	1	Endothelial_cells	SAC3D1
Endothelial_cells__NAALADL1	1	1	0.2	0.567216062331435	1	Endothelial_cells	NAALADL1
Endothelial_cells__CAPN1	1	1	0.2	0.567216062331435	1	Endothelial_cells	CAPN1
Endothelial_cells__LTBP3	1	1	0.2	0.567216062331435	1	Endothelial_cells	LTBP3
Endothelial_cells__EHBP1L1	1	1	0.2	0.567216062331435	1	Endothelial_cells	EHBP1L1
Endothelial_cells__SIPA1	1	1	0.2	0.567216062331435	1	Endothelial_cells	SIPA1
Endothelial_cells__RNASEH2C	1	1	0.2	0.567216062331435	1	Endothelial_cells	RNASEH2C
Endothelial_cells__MUS81	1	1	0.2	0.567216062331435	1	Endothelial_cells	MUS81
Endothelial_cells__KDM2A	1	1	0.2	0.567216062331435	1	Endothelial_cells	KDM2A
Endothelial_cells__RAD9A	1	1	0.2	0.567216062331435	1	Endothelial_cells	RAD9A
Endothelial_cells__POLD4	1	1	0.2	0.567216062331435	1	Endothelial_cells	POLD4
Endothelial_cells__CLCF1	1	1	0.2	0.567216062331435	1	Endothelial_cells	CLCF1
Endothelial_cells__CORO1B	1	1	0.2	0.567216062331435	1	Endothelial_cells	CORO1B
Endothelial_cells__AIP	1	1	0.2	0.567216062331435	1	Endothelial_cells	AIP
Endothelial_cells__GSTP1	1	1	0.2	0.567216062331435	1	Endothelial_cells	GSTP1
Endothelial_cells__TCIRG1	1	1	0.2	0.567216062331435	1	Endothelial_cells	TCIRG1
Endothelial_cells__PPP6R3	1	1	0.2	0.567216062331435	1	Endothelial_cells	PPP6R3
Endothelial_cells__RNF121	1	1	0.2	0.567216062331435	1	Endothelial_cells	RNF121
Endothelial_cells__PGM2L1	1	1	0.2	0.567216062331435	1	Endothelial_cells	PGM2L1
Endothelial_cells__RNF169	1	1	0.2	0.567216062331435	1	Endothelial_cells	RNF169
Endothelial_cells__ARRB1	1	1	0.2	0.567216062331435	1	Endothelial_cells	ARRB1
Endothelial_cells__GDPD5	1	1	0.2	0.567216062331435	1	Endothelial_cells	GDPD5
Endothelial_cells__SERPINH1	1	1	0.2	0.567216062331435	1	Endothelial_cells	SERPINH1
Endothelial_cells__LRRC32	1	1	0.2	0.567216062331435	1	Endothelial_cells	LRRC32
Endothelial_cells__ACER3	1	1	0.2	0.567216062331435	1	Endothelial_cells	ACER3
Endothelial_cells__CLNS1A	1	1	0.2	0.567216062331435	1	Endothelial_cells	CLNS1A
Endothelial_cells__AAMDC	1	1	0.2	0.567216062331435	1	Endothelial_cells	AAMDC
Endothelial_cells__GAB2	1	1	0.2	0.567216062331435	1	Endothelial_cells	GAB2
Endothelial_cells__PRCP	1	1	0.2	0.567216062331435	1	Endothelial_cells	PRCP
Endothelial_cells__PCF11	1	1	0.2	0.567216062331435	1	Endothelial_cells	PCF11
Endothelial_cells__ANKRD42	1	1	0.2	0.567216062331435	1	Endothelial_cells	ANKRD42
Endothelial_cells__CCDC90B	1	1	0.2	0.567216062331435	1	Endothelial_cells	CCDC90B
Endothelial_cells__TMEM126B	1	1	0.2	0.567216062331435	1	Endothelial_cells	TMEM126B
Endothelial_cells__TMEM135	1	1	0.2	0.567216062331435	1	Endothelial_cells	TMEM135
Endothelial_cells__CTSC	1	1	0.2	0.567216062331435	1	Endothelial_cells	CTSC
Endothelial_cells__CHORDC1	1	1	0.2	0.567216062331435	1	Endothelial_cells	CHORDC1
Endothelial_cells__SMCO4	1	1	0.2	0.567216062331435	1	Endothelial_cells	SMCO4
Endothelial_cells__TAF1D	1	1	0.2	0.567216062331435	1	Endothelial_cells	TAF1D
Endothelial_cells__C11ORF54	1	1	0.2	0.567216062331435	1	Endothelial_cells	C11ORF54
Endothelial_cells__AMOTL1	1	1	0.2	0.567216062331435	1	Endothelial_cells	AMOTL1
Endothelial_cells__CWC15	1	1	0.2	0.567216062331435	1	Endothelial_cells	CWC15
Endothelial_cells__SESN3	1	1	0.2	0.567216062331435	1	Endothelial_cells	SESN3
Endothelial_cells__CCDC82	1	1	0.2	0.567216062331435	1	Endothelial_cells	CCDC82
Endothelial_cells__BIRC3	1	1	0.2	0.567216062331435	1	Endothelial_cells	BIRC3
Endothelial_cells__TMEM123	1	1	0.2	0.567216062331435	1	Endothelial_cells	TMEM123
Endothelial_cells__DCUN1D5	1	1	0.2	0.567216062331435	1	Endothelial_cells	DCUN1D5
Endothelial_cells__PDGFD	1	1	0.2	0.567216062331435	1	Endothelial_cells	PDGFD
Endothelial_cells__MSANTD4	1	1	0.2	0.567216062331435	1	Endothelial_cells	MSANTD4
Endothelial_cells__KBTBD3	1	1	0.2	0.567216062331435	1	Endothelial_cells	KBTBD3
Endothelial_cells__AASDHPPT	1	1	0.2	0.567216062331435	1	Endothelial_cells	AASDHPPT
Endothelial_cells__ALKBH8	1	1	0.2	0.567216062331435	1	Endothelial_cells	ALKBH8
Endothelial_cells__ACAT1	1	1	0.2	0.567216062331435	1	Endothelial_cells	ACAT1
Endothelial_cells__EXPH5	1	1	0.2	0.567216062331435	1	Endothelial_cells	EXPH5
Endothelial_cells__DDX10	1	1	0.2	0.567216062331435	1	Endothelial_cells	DDX10
Endothelial_cells__ZC3H12C	1	1	0.2	0.567216062331435	1	Endothelial_cells	ZC3H12C
Endothelial_cells__RDX	1	1	0.2	0.567216062331435	1	Endothelial_cells	RDX
Endothelial_cells__ARHGAP20	1	1	0.2	0.567216062331435	1	Endothelial_cells	ARHGAP20
Endothelial_cells__LAYN	1	1	0.2	0.567216062331435	1	Endothelial_cells	LAYN
Endothelial_cells__PPP2R1B	1	1	0.2	0.567216062331435	1	Endothelial_cells	PPP2R1B
Endothelial_cells__ZW10	1	1	0.2	0.567216062331435	1	Endothelial_cells	ZW10
Endothelial_cells__ZBTB16	1	1	0.2	0.567216062331435	1	Endothelial_cells	ZBTB16
Endothelial_cells__C11ORF71	1	1	0.2	0.567216062331435	1	Endothelial_cells	C11ORF71
Endothelial_cells__RBM7	1	1	0.2	0.567216062331435	1	Endothelial_cells	RBM7
Endothelial_cells__REXO2	1	1	0.2	0.567216062331435	1	Endothelial_cells	REXO2
Endothelial_cells__BUD13	1	1	0.2	0.567216062331435	1	Endothelial_cells	BUD13
Endothelial_cells__SIK3	1	1	0.2	0.567216062331435	1	Endothelial_cells	SIK3
Endothelial_cells__SIDT2	1	1	0.2	0.567216062331435	1	Endothelial_cells	SIDT2
Endothelial_cells__MPZL2	1	1	0.2	0.567216062331435	1	Endothelial_cells	MPZL2
Endothelial_cells__TMEM25	1	1	0.2	0.567216062331435	1	Endothelial_cells	TMEM25
Endothelial_cells__PHLDB1	1	1	0.2	0.567216062331435	1	Endothelial_cells	PHLDB1
Endothelial_cells__CCDC84	1	1	0.2	0.567216062331435	1	Endothelial_cells	CCDC84
Endothelial_cells__DPAGT1	1	1	0.2	0.567216062331435	1	Endothelial_cells	DPAGT1
Endothelial_cells__OAF	1	1	0.2	0.567216062331435	1	Endothelial_cells	OAF
Endothelial_cells__HSPA8	1	1	0.2	0.567216062331435	1	Endothelial_cells	HSPA8
Endothelial_cells__SIAE	1	1	0.2	0.567216062331435	1	Endothelial_cells	SIAE
Endothelial_cells__NRGN	1	1	0.2	0.567216062331435	1	Endothelial_cells	NRGN
Endothelial_cells__ESAM	1	1	0.2	0.567216062331435	1	Endothelial_cells	ESAM
Endothelial_cells__MSANTD2	1	1	0.2	0.567216062331435	1	Endothelial_cells	MSANTD2
Endothelial_cells__ROBO3	1	1	0.2	0.567216062331435	1	Endothelial_cells	ROBO3
Endothelial_cells__PUS3	1	1	0.2	0.567216062331435	1	Endothelial_cells	PUS3
Endothelial_cells__DCPS	1	1	0.2	0.567216062331435	1	Endothelial_cells	DCPS
Endothelial_cells__ETS1	1	1	0.2	0.567216062331435	1	Endothelial_cells	ETS1
Endothelial_cells__NFRKB	1	1	0.2	0.567216062331435	1	Endothelial_cells	NFRKB
Endothelial_cells__ZBTB44	1	1	0.2	0.567216062331435	1	Endothelial_cells	ZBTB44
Endothelial_cells__JAM3	1	1	0.2	0.567216062331435	1	Endothelial_cells	JAM3
Endothelial_cells__ACAD8	1	1	0.2	0.567216062331435	1	Endothelial_cells	ACAD8
Endothelial_cells__LARP4B	1	1	0.2	0.567216062331435	1	Endothelial_cells	LARP4B
Endothelial_cells__PFKP	1	1	0.2	0.567216062331435	1	Endothelial_cells	PFKP
Endothelial_cells__KLF6	1	1	0.2	0.567216062331435	1	Endothelial_cells	KLF6
Endothelial_cells__AKR1C3	1	1	0.2	0.567216062331435	1	Endothelial_cells	AKR1C3
Endothelial_cells__NET1	1	1	0.2	0.567216062331435	1	Endothelial_cells	NET1
Endothelial_cells__ANKRD16	1	1	0.2	0.567216062331435	1	Endothelial_cells	ANKRD16
Endothelial_cells__IL15RA	1	1	0.2	0.567216062331435	1	Endothelial_cells	IL15RA
Endothelial_cells__RBM17	1	1	0.2	0.567216062331435	1	Endothelial_cells	RBM17
Endothelial_cells__PFKFB3	1	1	0.2	0.567216062331435	1	Endothelial_cells	PFKFB3
Endothelial_cells__SFMBT2	1	1	0.2	0.567216062331435	1	Endothelial_cells	SFMBT2
Endothelial_cells__GATA3	1	1	0.2	0.567216062331435	1	Endothelial_cells	GATA3
Endothelial_cells__CAMK1D	1	1	0.2	0.567216062331435	1	Endothelial_cells	CAMK1D
Endothelial_cells__CCDC3	1	1	0.2	0.567216062331435	1	Endothelial_cells	CCDC3
Endothelial_cells__SEPHS1	1	1	0.2	0.567216062331435	1	Endothelial_cells	SEPHS1
Endothelial_cells__HSPA14	1	1	0.2	0.567216062331435	1	Endothelial_cells	HSPA14
Endothelial_cells__DCLRE1C	1	1	0.2	0.567216062331435	1	Endothelial_cells	DCLRE1C
Endothelial_cells__FAM171A1	1	1	0.2	0.567216062331435	1	Endothelial_cells	FAM171A1
Endothelial_cells__PTER	1	1	0.2	0.567216062331435	1	Endothelial_cells	PTER
Endothelial_cells__RSU1	1	1	0.2	0.567216062331435	1	Endothelial_cells	RSU1
Endothelial_cells__VIM	1	1	0.2	0.567216062331435	1	Endothelial_cells	VIM
Endothelial_cells__ST8SIA6	1	1	0.2	0.567216062331435	1	Endothelial_cells	ST8SIA6
Endothelial_cells__STAM	1	1	0.2	0.567216062331435	1	Endothelial_cells	STAM
Endothelial_cells__DNAJC1	1	1	0.2	0.567216062331435	1	Endothelial_cells	DNAJC1
Endothelial_cells__YME1L1	1	1	0.2	0.567216062331435	1	Endothelial_cells	YME1L1
Endothelial_cells__MPP7	1	1	0.2	0.567216062331435	1	Endothelial_cells	MPP7
Endothelial_cells__SVIL	1	1	0.2	0.567216062331435	1	Endothelial_cells	SVIL
Endothelial_cells__PARD3	1	1	0.2	0.567216062331435	1	Endothelial_cells	PARD3
Endothelial_cells__CREM	1	1	0.2	0.567216062331435	1	Endothelial_cells	CREM
Endothelial_cells__TIMM23	1	1	0.2	0.567216062331435	1	Endothelial_cells	TIMM23
Endothelial_cells__CSTF2T	1	1	0.2	0.567216062331435	1	Endothelial_cells	CSTF2T
Endothelial_cells__IPMK	1	1	0.2	0.567216062331435	1	Endothelial_cells	IPMK
Endothelial_cells__CISD1	1	1	0.2	0.567216062331435	1	Endothelial_cells	CISD1
Endothelial_cells__UBE2D1	1	1	0.2	0.567216062331435	1	Endothelial_cells	UBE2D1
Endothelial_cells__TFAM	1	1	0.2	0.567216062331435	1	Endothelial_cells	TFAM
Endothelial_cells__RHOBTB1	1	1	0.2	0.567216062331435	1	Endothelial_cells	RHOBTB1
Endothelial_cells__ARID5B	1	1	0.2	0.567216062331435	1	Endothelial_cells	ARID5B
Endothelial_cells__REEP3	1	1	0.2	0.567216062331435	1	Endothelial_cells	REEP3
Endothelial_cells__DDX21	1	1	0.2	0.567216062331435	1	Endothelial_cells	DDX21
Endothelial_cells__KIF1BP	1	1	0.2	0.567216062331435	1	Endothelial_cells	KIF1BP
Endothelial_cells__TSPAN15	1	1	0.2	0.567216062331435	1	Endothelial_cells	TSPAN15
Endothelial_cells__PPA1	1	1	0.2	0.567216062331435	1	Endothelial_cells	PPA1
Endothelial_cells__EIF4EBP2	1	1	0.2	0.567216062331435	1	Endothelial_cells	EIF4EBP2
Endothelial_cells__UNC5B	1	1	0.2	0.567216062331435	1	Endothelial_cells	UNC5B
Endothelial_cells__PSAP	1	1	0.2	0.567216062331435	1	Endothelial_cells	PSAP
Endothelial_cells__SPOCK2	1	1	0.2	0.567216062331435	1	Endothelial_cells	SPOCK2
Endothelial_cells__ASCC1	1	1	0.2	0.567216062331435	1	Endothelial_cells	ASCC1
Endothelial_cells__DDIT4	1	1	0.2	0.567216062331435	1	Endothelial_cells	DDIT4
Endothelial_cells__MCU	1	1	0.2	0.567216062331435	1	Endothelial_cells	MCU
Endothelial_cells__ECD	1	1	0.2	0.567216062331435	1	Endothelial_cells	ECD
Endothelial_cells__USP54	1	1	0.2	0.567216062331435	1	Endothelial_cells	USP54
Endothelial_cells__CAMK2G	1	1	0.2	0.567216062331435	1	Endothelial_cells	CAMK2G
Endothelial_cells__PLAU	1	1	0.2	0.567216062331435	1	Endothelial_cells	PLAU
Endothelial_cells__VCL	1	1	0.2	0.567216062331435	1	Endothelial_cells	VCL
Endothelial_cells__COMTD1	1	1	0.2	0.567216062331435	1	Endothelial_cells	COMTD1
Endothelial_cells__PPIF	1	1	0.2	0.567216062331435	1	Endothelial_cells	PPIF
Endothelial_cells__ZCCHC24	1	1	0.2	0.567216062331435	1	Endothelial_cells	ZCCHC24
Endothelial_cells__TSPAN14	1	1	0.2	0.567216062331435	1	Endothelial_cells	TSPAN14
Endothelial_cells__ADIRF	1	1	0.2	0.567216062331435	1	Endothelial_cells	ADIRF
Endothelial_cells__GLUD1	1	1	0.2	0.567216062331435	1	Endothelial_cells	GLUD1
Endothelial_cells__PAPSS2	1	1	0.2	0.567216062331435	1	Endothelial_cells	PAPSS2
Endothelial_cells__ATAD1	1	1	0.2	0.567216062331435	1	Endothelial_cells	ATAD1
Endothelial_cells__FAS	1	1	0.2	0.567216062331435	1	Endothelial_cells	FAS
Endothelial_cells__IFIT2	1	1	0.2	0.567216062331435	1	Endothelial_cells	IFIT2
Endothelial_cells__IFIT3	1	1	0.2	0.567216062331435	1	Endothelial_cells	IFIT3
Endothelial_cells__IFIT1	1	1	0.2	0.567216062331435	1	Endothelial_cells	IFIT1
Endothelial_cells__KIF20B	1	1	0.2	0.567216062331435	1	Endothelial_cells	KIF20B
Endothelial_cells__PCGF5	1	1	0.2	0.567216062331435	1	Endothelial_cells	PCGF5
Endothelial_cells__HECTD2	1	1	0.2	0.567216062331435	1	Endothelial_cells	HECTD2
Endothelial_cells__CPEB3	1	1	0.2	0.567216062331435	1	Endothelial_cells	CPEB3
Endothelial_cells__IDE	1	1	0.2	0.567216062331435	1	Endothelial_cells	IDE
Endothelial_cells__HHEX	1	1	0.2	0.567216062331435	1	Endothelial_cells	HHEX
Endothelial_cells__MYOF	1	1	0.2	0.567216062331435	1	Endothelial_cells	MYOF
Endothelial_cells__TBC1D12	1	1	0.2	0.567216062331435	1	Endothelial_cells	TBC1D12
Endothelial_cells__SORBS1	1	1	0.2	0.567216062331435	1	Endothelial_cells	SORBS1
Endothelial_cells__TCTN3	1	1	0.2	0.567216062331435	1	Endothelial_cells	TCTN3
Endothelial_cells__ENTPD1	1	1	0.2	0.567216062331435	1	Endothelial_cells	ENTPD1
Endothelial_cells__LCOR	1	1	0.2	0.567216062331435	1	Endothelial_cells	LCOR
Endothelial_cells__RRP12	1	1	0.2	0.567216062331435	1	Endothelial_cells	RRP12
Endothelial_cells__UBTD1	1	1	0.2	0.567216062331435	1	Endothelial_cells	UBTD1
Endothelial_cells__MARVELD1	1	1	0.2	0.567216062331435	1	Endothelial_cells	MARVELD1
Endothelial_cells__GOT1	1	1	0.2	0.567216062331435	1	Endothelial_cells	GOT1
Endothelial_cells__COX15	1	1	0.2	0.567216062331435	1	Endothelial_cells	COX15
Endothelial_cells__DNMBP	1	1	0.2	0.567216062331435	1	Endothelial_cells	DNMBP
Endothelial_cells__BLOC1S2	1	1	0.2	0.567216062331435	1	Endothelial_cells	BLOC1S2
Endothelial_cells__HIF1AN	1	1	0.2	0.567216062331435	1	Endothelial_cells	HIF1AN
Endothelial_cells__SFXN3	1	1	0.2	0.567216062331435	1	Endothelial_cells	SFXN3
Endothelial_cells__NPM3	1	1	0.2	0.567216062331435	1	Endothelial_cells	NPM3
Endothelial_cells__NOLC1	1	1	0.2	0.567216062331435	1	Endothelial_cells	NOLC1
Endothelial_cells__CUEDC2	1	1	0.2	0.567216062331435	1	Endothelial_cells	CUEDC2
Endothelial_cells__NT5C2	1	1	0.2	0.567216062331435	1	Endothelial_cells	NT5C2
Endothelial_cells__PDCD11	1	1	0.2	0.567216062331435	1	Endothelial_cells	PDCD11
Endothelial_cells__CALHM2	1	1	0.2	0.567216062331435	1	Endothelial_cells	CALHM2
Endothelial_cells__SH3PXD2A	1	1	0.2	0.567216062331435	1	Endothelial_cells	SH3PXD2A
Endothelial_cells__SFR1	1	1	0.2	0.567216062331435	1	Endothelial_cells	SFR1
Endothelial_cells__GSTO2	1	1	0.2	0.567216062331435	1	Endothelial_cells	GSTO2
Endothelial_cells__ADD3	1	1	0.2	0.567216062331435	1	Endothelial_cells	ADD3
Endothelial_cells__SMNDC1	1	1	0.2	0.567216062331435	1	Endothelial_cells	SMNDC1
Endothelial_cells__PDCD4	1	1	0.2	0.567216062331435	1	Endothelial_cells	PDCD4
Endothelial_cells__CASP7	1	1	0.2	0.567216062331435	1	Endothelial_cells	CASP7
Endothelial_cells__NHLRC2	1	1	0.2	0.567216062331435	1	Endothelial_cells	NHLRC2
Endothelial_cells__ADRB1	1	1	0.2	0.567216062331435	1	Endothelial_cells	ADRB1
Endothelial_cells__CCDC186	1	1	0.2	0.567216062331435	1	Endothelial_cells	CCDC186
Endothelial_cells__FAM160B1	1	1	0.2	0.567216062331435	1	Endothelial_cells	FAM160B1
Endothelial_cells__FAM204A	1	1	0.2	0.567216062331435	1	Endothelial_cells	FAM204A
Endothelial_cells__SFXN4	1	1	0.2	0.567216062331435	1	Endothelial_cells	SFXN4
Endothelial_cells__PRDX3	1	1	0.2	0.567216062331435	1	Endothelial_cells	PRDX3
Endothelial_cells__GRK5	1	1	0.2	0.567216062331435	1	Endothelial_cells	GRK5
Endothelial_cells__HTRA1	1	1	0.2	0.567216062331435	1	Endothelial_cells	HTRA1
Endothelial_cells__BUB3	1	1	0.2	0.567216062331435	1	Endothelial_cells	BUB3
Endothelial_cells__PTPRE	1	1	0.2	0.567216062331435	1	Endothelial_cells	PTPRE
Endothelial_cells__MGMT	1	1	0.2	0.567216062331435	1	Endothelial_cells	MGMT
Endothelial_cells__FUOM	1	1	0.2	0.567216062331435	1	Endothelial_cells	FUOM
Endothelial_cells__ECHS1	1	1	0.2	0.567216062331435	1	Endothelial_cells	ECHS1
Endothelial_cells__KDM5A	1	1	0.2	0.567216062331435	1	Endothelial_cells	KDM5A
Endothelial_cells__ADIPOR2	1	1	0.2	0.567216062331435	1	Endothelial_cells	ADIPOR2
Endothelial_cells__FKBP4	1	1	0.2	0.567216062331435	1	Endothelial_cells	FKBP4
Endothelial_cells__ITFG2	1	1	0.2	0.567216062331435	1	Endothelial_cells	ITFG2
Endothelial_cells__TULP3	1	1	0.2	0.567216062331435	1	Endothelial_cells	TULP3
Endothelial_cells__CCND2	1	1	0.2	0.567216062331435	1	Endothelial_cells	CCND2
Endothelial_cells__C12ORF4	1	1	0.2	0.567216062331435	1	Endothelial_cells	C12ORF4
Endothelial_cells__CD9	1	1	0.2	0.567216062331435	1	Endothelial_cells	CD9
Endothelial_cells__SCNN1A	1	1	0.2	0.567216062331435	1	Endothelial_cells	SCNN1A
Endothelial_cells__IFFO1	1	1	0.2	0.567216062331435	1	Endothelial_cells	IFFO1
Endothelial_cells__NOP2	1	1	0.2	0.567216062331435	1	Endothelial_cells	NOP2
Endothelial_cells__CHD4	1	1	0.2	0.567216062331435	1	Endothelial_cells	CHD4
Endothelial_cells__ING4	1	1	0.2	0.567216062331435	1	Endothelial_cells	ING4
Endothelial_cells__ZNF384	1	1	0.2	0.567216062331435	1	Endothelial_cells	ZNF384
Endothelial_cells__COPS7A	1	1	0.2	0.567216062331435	1	Endothelial_cells	COPS7A
Endothelial_cells__PTMS	1	1	0.2	0.567216062331435	1	Endothelial_cells	PTMS
Endothelial_cells__ATN1	1	1	0.2	0.567216062331435	1	Endothelial_cells	ATN1
Endothelial_cells__PHB2	1	1	0.2	0.567216062331435	1	Endothelial_cells	PHB2
Endothelial_cells__LPCAT3	1	1	0.2	0.567216062331435	1	Endothelial_cells	LPCAT3
Endothelial_cells__CLSTN3	1	1	0.2	0.567216062331435	1	Endothelial_cells	CLSTN3
Endothelial_cells__NECAP1	1	1	0.2	0.567216062331435	1	Endothelial_cells	NECAP1
Endothelial_cells__CLEC4E	1	1	0.2	0.567216062331435	1	Endothelial_cells	CLEC4E
Endothelial_cells__CLEC1A	1	1	0.2	0.567216062331435	1	Endothelial_cells	CLEC1A
Endothelial_cells__GABARAPL1	1	1	0.2	0.567216062331435	1	Endothelial_cells	GABARAPL1
Endothelial_cells__SMIM10L1	1	1	0.2	0.567216062331435	1	Endothelial_cells	SMIM10L1
Endothelial_cells__ETV6	1	1	0.2	0.567216062331435	1	Endothelial_cells	ETV6
Endothelial_cells__MANSC1	1	1	0.2	0.567216062331435	1	Endothelial_cells	MANSC1
Endothelial_cells__BORCS5	1	1	0.2	0.567216062331435	1	Endothelial_cells	BORCS5
Endothelial_cells__CREBL2	1	1	0.2	0.567216062331435	1	Endothelial_cells	CREBL2
Endothelial_cells__GPRC5A	1	1	0.2	0.567216062331435	1	Endothelial_cells	GPRC5A
Endothelial_cells__ARHGDIB	1	1	0.2	0.567216062331435	1	Endothelial_cells	ARHGDIB
Endothelial_cells__EPS8	1	1	0.2	0.567216062331435	1	Endothelial_cells	EPS8
Endothelial_cells__DERA	1	1	0.2	0.567216062331435	1	Endothelial_cells	DERA
Endothelial_cells__PLEKHA5	1	1	0.2	0.567216062331435	1	Endothelial_cells	PLEKHA5
Endothelial_cells__GOLT1B	1	1	0.2	0.567216062331435	1	Endothelial_cells	GOLT1B
Endothelial_cells__LDHB	1	1	0.2	0.567216062331435	1	Endothelial_cells	LDHB
Endothelial_cells__CMAS	1	1	0.2	0.567216062331435	1	Endothelial_cells	CMAS
Endothelial_cells__C2CD5	1	1	0.2	0.567216062331435	1	Endothelial_cells	C2CD5
Endothelial_cells__BCAT1	1	1	0.2	0.567216062331435	1	Endothelial_cells	BCAT1
Endothelial_cells__MED21	1	1	0.2	0.567216062331435	1	Endothelial_cells	MED21
Endothelial_cells__ARNTL2	1	1	0.2	0.567216062331435	1	Endothelial_cells	ARNTL2
Endothelial_cells__PPFIBP1	1	1	0.2	0.567216062331435	1	Endothelial_cells	PPFIBP1
Endothelial_cells__ERGIC2	1	1	0.2	0.567216062331435	1	Endothelial_cells	ERGIC2
Endothelial_cells__TMTC1	1	1	0.2	0.567216062331435	1	Endothelial_cells	TMTC1
Endothelial_cells__IPO8	1	1	0.2	0.567216062331435	1	Endothelial_cells	IPO8
Endothelial_cells__CAPRIN2	1	1	0.2	0.567216062331435	1	Endothelial_cells	CAPRIN2
Endothelial_cells__DENND5B	1	1	0.2	0.567216062331435	1	Endothelial_cells	DENND5B
Endothelial_cells__AMN1	1	1	0.2	0.567216062331435	1	Endothelial_cells	AMN1
Endothelial_cells__DNM1L	1	1	0.2	0.567216062331435	1	Endothelial_cells	DNM1L
Endothelial_cells__YARS2	1	1	0.2	0.567216062331435	1	Endothelial_cells	YARS2
Endothelial_cells__CPNE8	1	1	0.2	0.567216062331435	1	Endothelial_cells	CPNE8
Endothelial_cells__SLC2A13	1	1	0.2	0.567216062331435	1	Endothelial_cells	SLC2A13
Endothelial_cells__GXYLT1	1	1	0.2	0.567216062331435	1	Endothelial_cells	GXYLT1
Endothelial_cells__PRICKLE1	1	1	0.2	0.567216062331435	1	Endothelial_cells	PRICKLE1
Endothelial_cells__PUS7L	1	1	0.2	0.567216062331435	1	Endothelial_cells	PUS7L
Endothelial_cells__IRAK4	1	1	0.2	0.567216062331435	1	Endothelial_cells	IRAK4
Endothelial_cells__ARID2	1	1	0.2	0.567216062331435	1	Endothelial_cells	ARID2
Endothelial_cells__SLC38A2	1	1	0.2	0.567216062331435	1	Endothelial_cells	SLC38A2
Endothelial_cells__AMIGO2	1	1	0.2	0.567216062331435	1	Endothelial_cells	AMIGO2
Endothelial_cells__SLC48A1	1	1	0.2	0.567216062331435	1	Endothelial_cells	SLC48A1
Endothelial_cells__TMEM106C	1	1	0.2	0.567216062331435	1	Endothelial_cells	TMEM106C
Endothelial_cells__ASB8	1	1	0.2	0.567216062331435	1	Endothelial_cells	ASB8
Endothelial_cells__RND1	1	1	0.2	0.567216062331435	1	Endothelial_cells	RND1
Endothelial_cells__PRKAG1	1	1	0.2	0.567216062331435	1	Endothelial_cells	PRKAG1
Endothelial_cells__SPATS2	1	1	0.2	0.567216062331435	1	Endothelial_cells	SPATS2
Endothelial_cells__FMNL3	1	1	0.2	0.567216062331435	1	Endothelial_cells	FMNL3
Endothelial_cells__TMBIM6	1	1	0.2	0.567216062331435	1	Endothelial_cells	TMBIM6
Endothelial_cells__COX14	1	1	0.2	0.567216062331435	1	Endothelial_cells	COX14
Endothelial_cells__LIMA1	1	1	0.2	0.567216062331435	1	Endothelial_cells	LIMA1
Endothelial_cells__LARP4	1	1	0.2	0.567216062331435	1	Endothelial_cells	LARP4
Endothelial_cells__METTL7A	1	1	0.2	0.567216062331435	1	Endothelial_cells	METTL7A
Endothelial_cells__SLC11A2	1	1	0.2	0.567216062331435	1	Endothelial_cells	SLC11A2
Endothelial_cells__DAZAP2	1	1	0.2	0.567216062331435	1	Endothelial_cells	DAZAP2
Endothelial_cells__ACVRL1	1	1	0.2	0.567216062331435	1	Endothelial_cells	ACVRL1
Endothelial_cells__KRT8	1	1	0.2	0.567216062331435	1	Endothelial_cells	KRT8
Endothelial_cells__KRT18	1	1	0.2	0.567216062331435	1	Endothelial_cells	KRT18
Endothelial_cells__TNS2	1	1	0.2	0.567216062331435	1	Endothelial_cells	TNS2
Endothelial_cells__IGFBP6	1	1	0.2	0.567216062331435	1	Endothelial_cells	IGFBP6
Endothelial_cells__CSAD	1	1	0.2	0.567216062331435	1	Endothelial_cells	CSAD
Endothelial_cells__PFDN5	1	1	0.2	0.567216062331435	1	Endothelial_cells	PFDN5
Endothelial_cells__AAAS	1	1	0.2	0.567216062331435	1	Endothelial_cells	AAAS
Endothelial_cells__MAP3K12	1	1	0.2	0.567216062331435	1	Endothelial_cells	MAP3K12
Endothelial_cells__PYM1	1	1	0.2	0.567216062331435	1	Endothelial_cells	PYM1
Endothelial_cells__DGKA	1	1	0.2	0.567216062331435	1	Endothelial_cells	DGKA
Endothelial_cells__PA2G4	1	1	0.2	0.567216062331435	1	Endothelial_cells	PA2G4
Endothelial_cells__ESYT1	1	1	0.2	0.567216062331435	1	Endothelial_cells	ESYT1
Endothelial_cells__MYL6B	1	1	0.2	0.567216062331435	1	Endothelial_cells	MYL6B
Endothelial_cells__CNPY2	1	1	0.2	0.567216062331435	1	Endothelial_cells	CNPY2
Endothelial_cells__STAT2	1	1	0.2	0.567216062331435	1	Endothelial_cells	STAT2
Endothelial_cells__SPRYD4	1	1	0.2	0.567216062331435	1	Endothelial_cells	SPRYD4
Endothelial_cells__RBMS2	1	1	0.2	0.567216062331435	1	Endothelial_cells	RBMS2
Endothelial_cells__SHMT2	1	1	0.2	0.567216062331435	1	Endothelial_cells	SHMT2
Endothelial_cells__DTX3	1	1	0.2	0.567216062331435	1	Endothelial_cells	DTX3
Endothelial_cells__TSPAN31	1	1	0.2	0.567216062331435	1	Endothelial_cells	TSPAN31
Endothelial_cells__CDK4	1	1	0.2	0.567216062331435	1	Endothelial_cells	CDK4
Endothelial_cells__METTL1	1	1	0.2	0.567216062331435	1	Endothelial_cells	METTL1
Endothelial_cells__TSFM	1	1	0.2	0.567216062331435	1	Endothelial_cells	TSFM
Endothelial_cells__CTDSP2	1	1	0.2	0.567216062331435	1	Endothelial_cells	CTDSP2
Endothelial_cells__SRGAP1	1	1	0.2	0.567216062331435	1	Endothelial_cells	SRGAP1
Endothelial_cells__TBK1	1	1	0.2	0.567216062331435	1	Endothelial_cells	TBK1
Endothelial_cells__TBC1D30	1	1	0.2	0.567216062331435	1	Endothelial_cells	TBC1D30
Endothelial_cells__LLPH	1	1	0.2	0.567216062331435	1	Endothelial_cells	LLPH
Endothelial_cells__IRAK3	1	1	0.2	0.567216062331435	1	Endothelial_cells	IRAK3
Endothelial_cells__MDM1	1	1	0.2	0.567216062331435	1	Endothelial_cells	MDM1
Endothelial_cells__NUP107	1	1	0.2	0.567216062331435	1	Endothelial_cells	NUP107
Endothelial_cells__CPM	1	1	0.2	0.567216062331435	1	Endothelial_cells	CPM
Endothelial_cells__CCT2	1	1	0.2	0.567216062331435	1	Endothelial_cells	CCT2
Endothelial_cells__RAB3IP	1	1	0.2	0.567216062331435	1	Endothelial_cells	RAB3IP
Endothelial_cells__KCNMB4	1	1	0.2	0.567216062331435	1	Endothelial_cells	KCNMB4
Endothelial_cells__TBC1D15	1	1	0.2	0.567216062331435	1	Endothelial_cells	TBC1D15
Endothelial_cells__KRR1	1	1	0.2	0.567216062331435	1	Endothelial_cells	KRR1
Endothelial_cells__DUSP6	1	1	0.2	0.567216062331435	1	Endothelial_cells	DUSP6
Endothelial_cells__ATP2B1	1	1	0.2	0.567216062331435	1	Endothelial_cells	ATP2B1
Endothelial_cells__PLXNC1	1	1	0.2	0.567216062331435	1	Endothelial_cells	PLXNC1
Endothelial_cells__NR2C1	1	1	0.2	0.567216062331435	1	Endothelial_cells	NR2C1
Endothelial_cells__VEZT	1	1	0.2	0.567216062331435	1	Endothelial_cells	VEZT
Endothelial_cells__METAP2	1	1	0.2	0.567216062331435	1	Endothelial_cells	METAP2
Endothelial_cells__NTN4	1	1	0.2	0.567216062331435	1	Endothelial_cells	NTN4
Endothelial_cells__LTA4H	1	1	0.2	0.567216062331435	1	Endothelial_cells	LTA4H
Endothelial_cells__ELK3	1	1	0.2	0.567216062331435	1	Endothelial_cells	ELK3
Endothelial_cells__IKBIP	1	1	0.2	0.567216062331435	1	Endothelial_cells	IKBIP
Endothelial_cells__ACTR6	1	1	0.2	0.567216062331435	1	Endothelial_cells	ACTR6
Endothelial_cells__GAS2L3	1	1	0.2	0.567216062331435	1	Endothelial_cells	GAS2L3
Endothelial_cells__ARL1	1	1	0.2	0.567216062331435	1	Endothelial_cells	ARL1
Endothelial_cells__CHPT1	1	1	0.2	0.567216062331435	1	Endothelial_cells	CHPT1
Endothelial_cells__DRAM1	1	1	0.2	0.567216062331435	1	Endothelial_cells	DRAM1
Endothelial_cells__NUP37	1	1	0.2	0.567216062331435	1	Endothelial_cells	NUP37
Endothelial_cells__C12ORF73	1	1	0.2	0.567216062331435	1	Endothelial_cells	C12ORF73
Endothelial_cells__TDG	1	1	0.2	0.567216062331435	1	Endothelial_cells	TDG
Endothelial_cells__NFYB	1	1	0.2	0.567216062331435	1	Endothelial_cells	NFYB
Endothelial_cells__TXNRD1	1	1	0.2	0.567216062331435	1	Endothelial_cells	TXNRD1
Endothelial_cells__CHST11	1	1	0.2	0.567216062331435	1	Endothelial_cells	CHST11
Endothelial_cells__C12ORF45	1	1	0.2	0.567216062331435	1	Endothelial_cells	C12ORF45
Endothelial_cells__APPL2	1	1	0.2	0.567216062331435	1	Endothelial_cells	APPL2
Endothelial_cells__C12ORF75	1	1	0.2	0.567216062331435	1	Endothelial_cells	C12ORF75
Endothelial_cells__PRDM4	1	1	0.2	0.567216062331435	1	Endothelial_cells	PRDM4
Endothelial_cells__CORO1C	1	1	0.2	0.567216062331435	1	Endothelial_cells	CORO1C
Endothelial_cells__KCTD10	1	1	0.2	0.567216062331435	1	Endothelial_cells	KCTD10
Endothelial_cells__ANKRD13A	1	1	0.2	0.567216062331435	1	Endothelial_cells	ANKRD13A
Endothelial_cells__IFT81	1	1	0.2	0.567216062331435	1	Endothelial_cells	IFT81
Endothelial_cells__ATP2A2	1	1	0.2	0.567216062331435	1	Endothelial_cells	ATP2A2
Endothelial_cells__GPN3	1	1	0.2	0.567216062331435	1	Endothelial_cells	GPN3
Endothelial_cells__PPTC7	1	1	0.2	0.567216062331435	1	Endothelial_cells	PPTC7
Endothelial_cells__ALDH2	1	1	0.2	0.567216062331435	1	Endothelial_cells	ALDH2
Endothelial_cells__MAPKAPK5	1	1	0.2	0.567216062331435	1	Endothelial_cells	MAPKAPK5
Endothelial_cells__ERP29	1	1	0.2	0.567216062331435	1	Endothelial_cells	ERP29
Endothelial_cells__NAA25	1	1	0.2	0.567216062331435	1	Endothelial_cells	NAA25
Endothelial_cells__HECTD4	1	1	0.2	0.567216062331435	1	Endothelial_cells	HECTD4
Endothelial_cells__TPCN1	1	1	0.2	0.567216062331435	1	Endothelial_cells	TPCN1
Endothelial_cells__SLC8B1	1	1	0.2	0.567216062331435	1	Endothelial_cells	SLC8B1
Endothelial_cells__TESC	1	1	0.2	0.567216062331435	1	Endothelial_cells	TESC
Endothelial_cells__FBXO21	1	1	0.2	0.567216062331435	1	Endothelial_cells	FBXO21
Endothelial_cells__VSIG10	1	1	0.2	0.567216062331435	1	Endothelial_cells	VSIG10
Endothelial_cells__PEBP1	1	1	0.2	0.567216062331435	1	Endothelial_cells	PEBP1
Endothelial_cells__TRIAP1	1	1	0.2	0.567216062331435	1	Endothelial_cells	TRIAP1
Endothelial_cells__SRSF9	1	1	0.2	0.567216062331435	1	Endothelial_cells	SRSF9
Endothelial_cells__POP5	1	1	0.2	0.567216062331435	1	Endothelial_cells	POP5
Endothelial_cells__MLEC	1	1	0.2	0.567216062331435	1	Endothelial_cells	MLEC
Endothelial_cells__ACADS	1	1	0.2	0.567216062331435	1	Endothelial_cells	ACADS
Endothelial_cells__RNF34	1	1	0.2	0.567216062331435	1	Endothelial_cells	RNF34
Endothelial_cells__KDM2B	1	1	0.2	0.567216062331435	1	Endothelial_cells	KDM2B
Endothelial_cells__ORAI1	1	1	0.2	0.567216062331435	1	Endothelial_cells	ORAI1
Endothelial_cells__BCL7A	1	1	0.2	0.567216062331435	1	Endothelial_cells	BCL7A
Endothelial_cells__HIP1R	1	1	0.2	0.567216062331435	1	Endothelial_cells	HIP1R
Endothelial_cells__RILPL2	1	1	0.2	0.567216062331435	1	Endothelial_cells	RILPL2
Endothelial_cells__SNRNP35	1	1	0.2	0.567216062331435	1	Endothelial_cells	SNRNP35
Endothelial_cells__RILPL1	1	1	0.2	0.567216062331435	1	Endothelial_cells	RILPL1
Endothelial_cells__SCARB1	1	1	0.2	0.567216062331435	1	Endothelial_cells	SCARB1
Endothelial_cells__PGAM5	1	1	0.2	0.567216062331435	1	Endothelial_cells	PGAM5
Endothelial_cells__CHFR	1	1	0.2	0.567216062331435	1	Endothelial_cells	CHFR
Endothelial_cells__ZNF84	1	1	0.2	0.567216062331435	1	Endothelial_cells	ZNF84
Endothelial_cells__MICU2	1	1	0.2	0.567216062331435	1	Endothelial_cells	MICU2
Endothelial_cells__USP12	1	1	0.2	0.567216062331435	1	Endothelial_cells	USP12
Endothelial_cells__POLR1D	1	1	0.2	0.567216062331435	1	Endothelial_cells	POLR1D
Endothelial_cells__UBL3	1	1	0.2	0.567216062331435	1	Endothelial_cells	UBL3
Endothelial_cells__HSPH1	1	1	0.2	0.567216062331435	1	Endothelial_cells	HSPH1
Endothelial_cells__FRY	1	1	0.2	0.567216062331435	1	Endothelial_cells	FRY
Endothelial_cells__N4BP2L1	1	1	0.2	0.567216062331435	1	Endothelial_cells	N4BP2L1
Endothelial_cells__N4BP2L2	1	1	0.2	0.567216062331435	1	Endothelial_cells	N4BP2L2
Endothelial_cells__RFC3	1	1	0.2	0.567216062331435	1	Endothelial_cells	RFC3
Endothelial_cells__NBEA	1	1	0.2	0.567216062331435	1	Endothelial_cells	NBEA
Endothelial_cells__RFXAP	1	1	0.2	0.567216062331435	1	Endothelial_cells	RFXAP
Endothelial_cells__FOXO1	1	1	0.2	0.567216062331435	1	Endothelial_cells	FOXO1
Endothelial_cells__KBTBD7	1	1	0.2	0.567216062331435	1	Endothelial_cells	KBTBD7
Endothelial_cells__CCDC122	1	1	0.2	0.567216062331435	1	Endothelial_cells	CCDC122
Endothelial_cells__LACC1	1	1	0.2	0.567216062331435	1	Endothelial_cells	LACC1
Endothelial_cells__GPALPP1	1	1	0.2	0.567216062331435	1	Endothelial_cells	GPALPP1
Endothelial_cells__LRCH1	1	1	0.2	0.567216062331435	1	Endothelial_cells	LRCH1
Endothelial_cells__ESD	1	1	0.2	0.567216062331435	1	Endothelial_cells	ESD
Endothelial_cells__MED4	1	1	0.2	0.567216062331435	1	Endothelial_cells	MED4
[truncated: 16,930 more rows]

## Sheet: Table S12(celltype_score)
Table S12: ssGSEAof the Relevant Three Cells in the Test Set
sample	B_cell__ExpoA_ssGSEA	Endothelial_cells__ExpoA_ssGSEA	Epithelial_cells__ExpoA_ssGSEA
GSM3891623	6.16048295776917	9.58357953162686	9.1227248907026
GSM3891625	5.77610511329199	9.46341812715762	8.88019943920845
GSM3891627	5.75146156864002	10.2524715373475	8.98024593728573
GSM3891629	6.52179123303739	10.4634181271576	9.19811851219019
GSM3891631	5.52179123303739	9.5783877549053	8.19811851219019
